# Supplementary material
Source: publisher figshare collection journal article supplement (https://gsajournals.figshare.com/articles/dataset/_/11674221)

# Power simulation in F34 , Body Weight

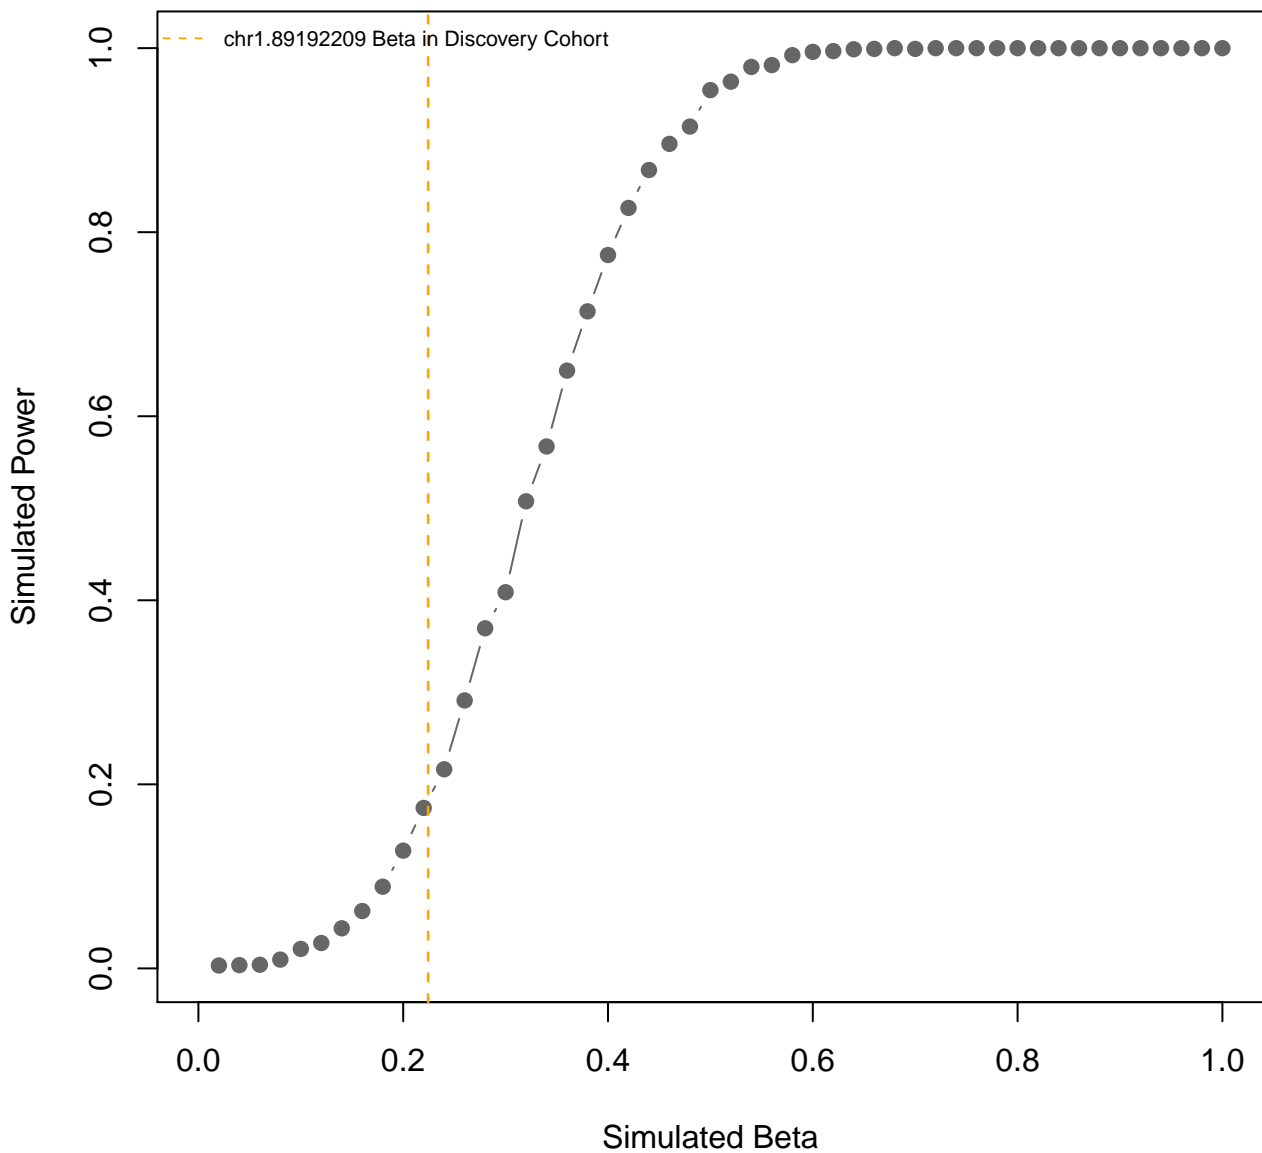

Power simulation in F34, sig. thresh = 0.05 , Body Weight

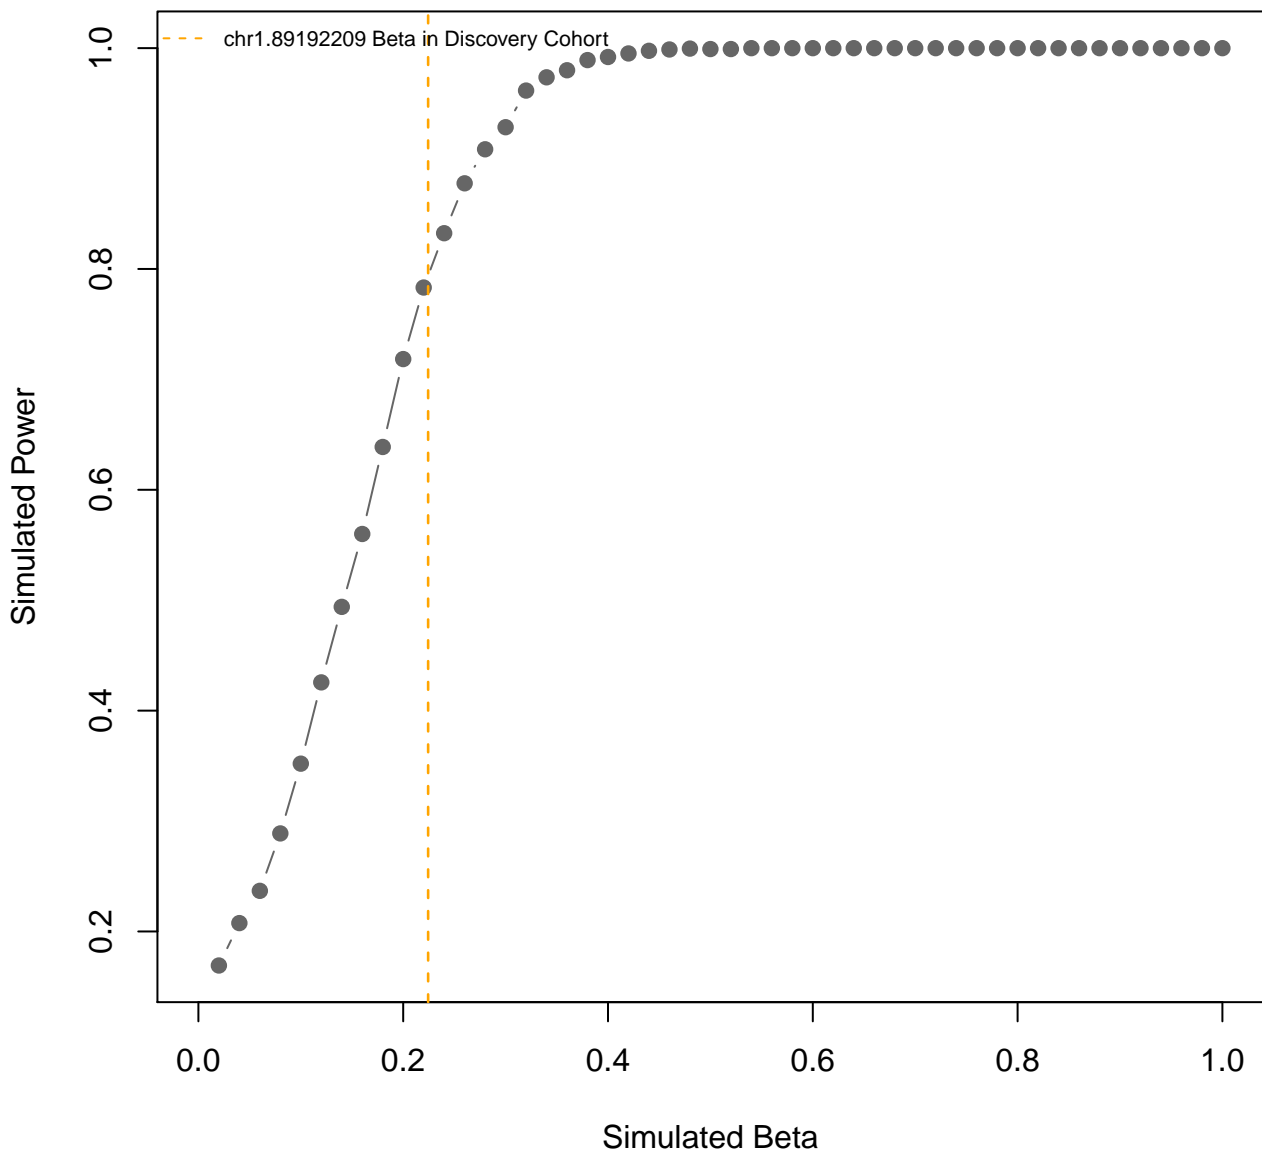

# Power simulation in F34 , Body Weight

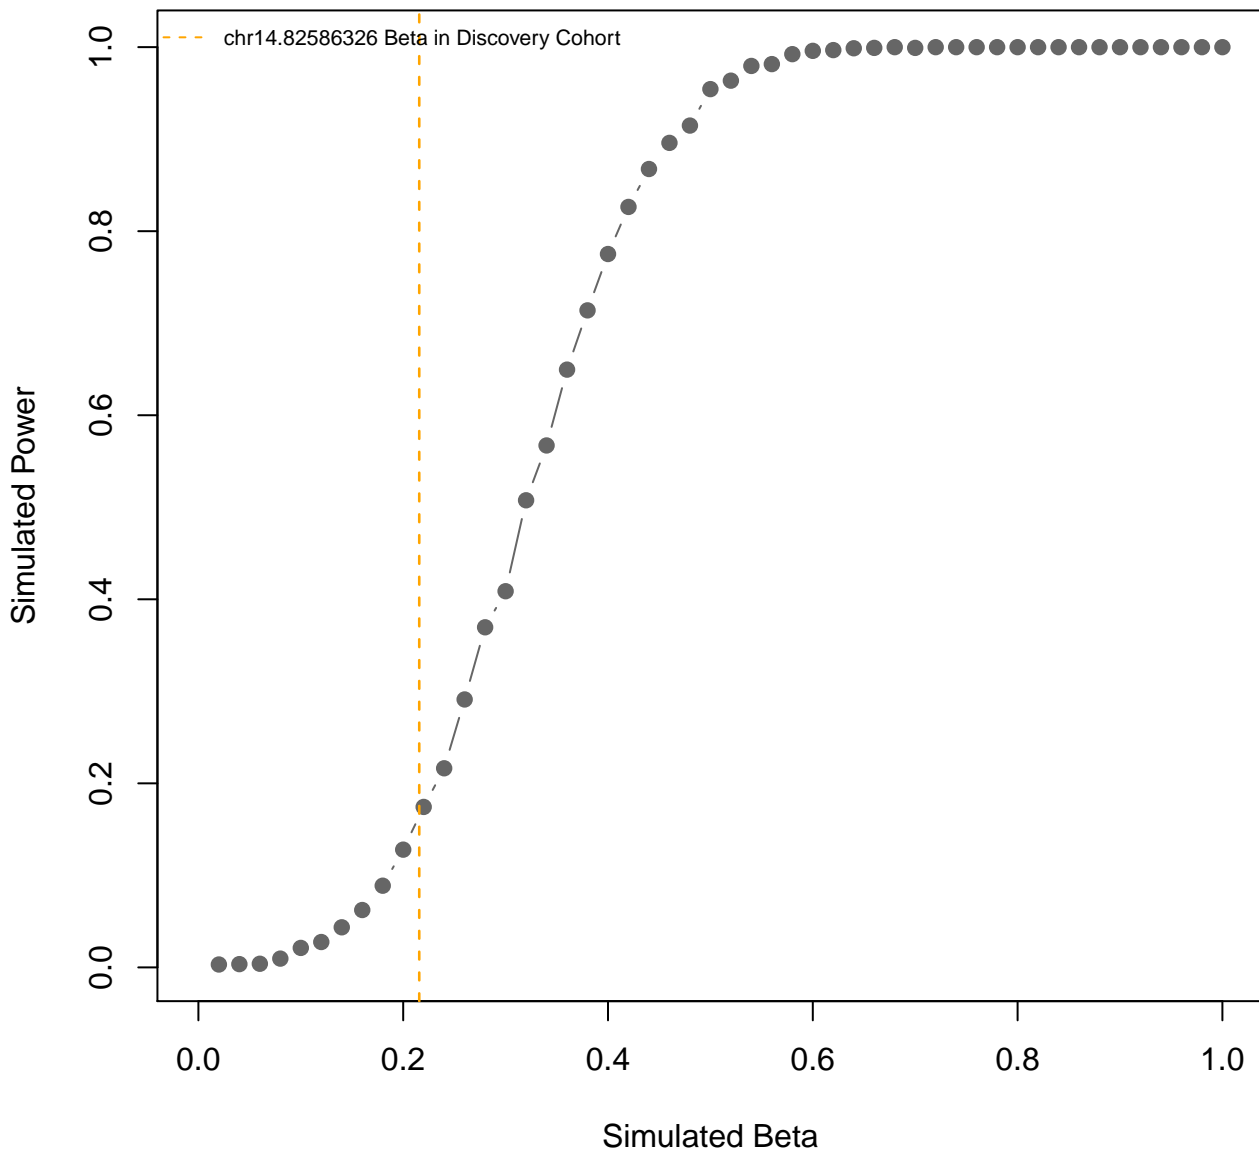

Power simulation in F34, sig. thresh = 0.05 , Body Weight

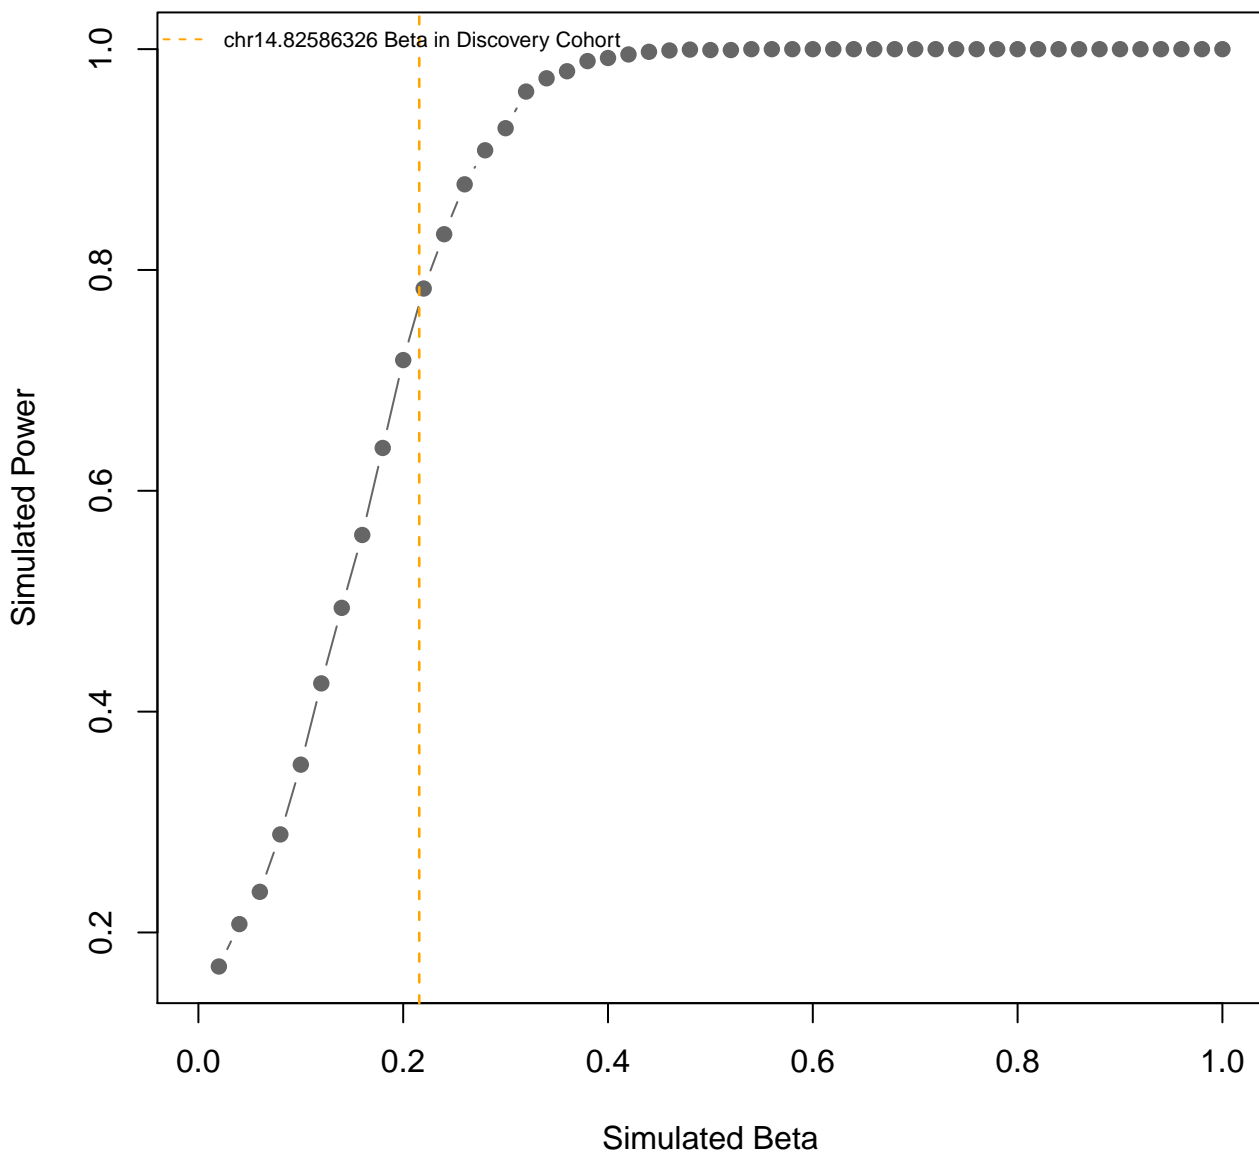

### Power simulation in F34 , Coat Color Albino

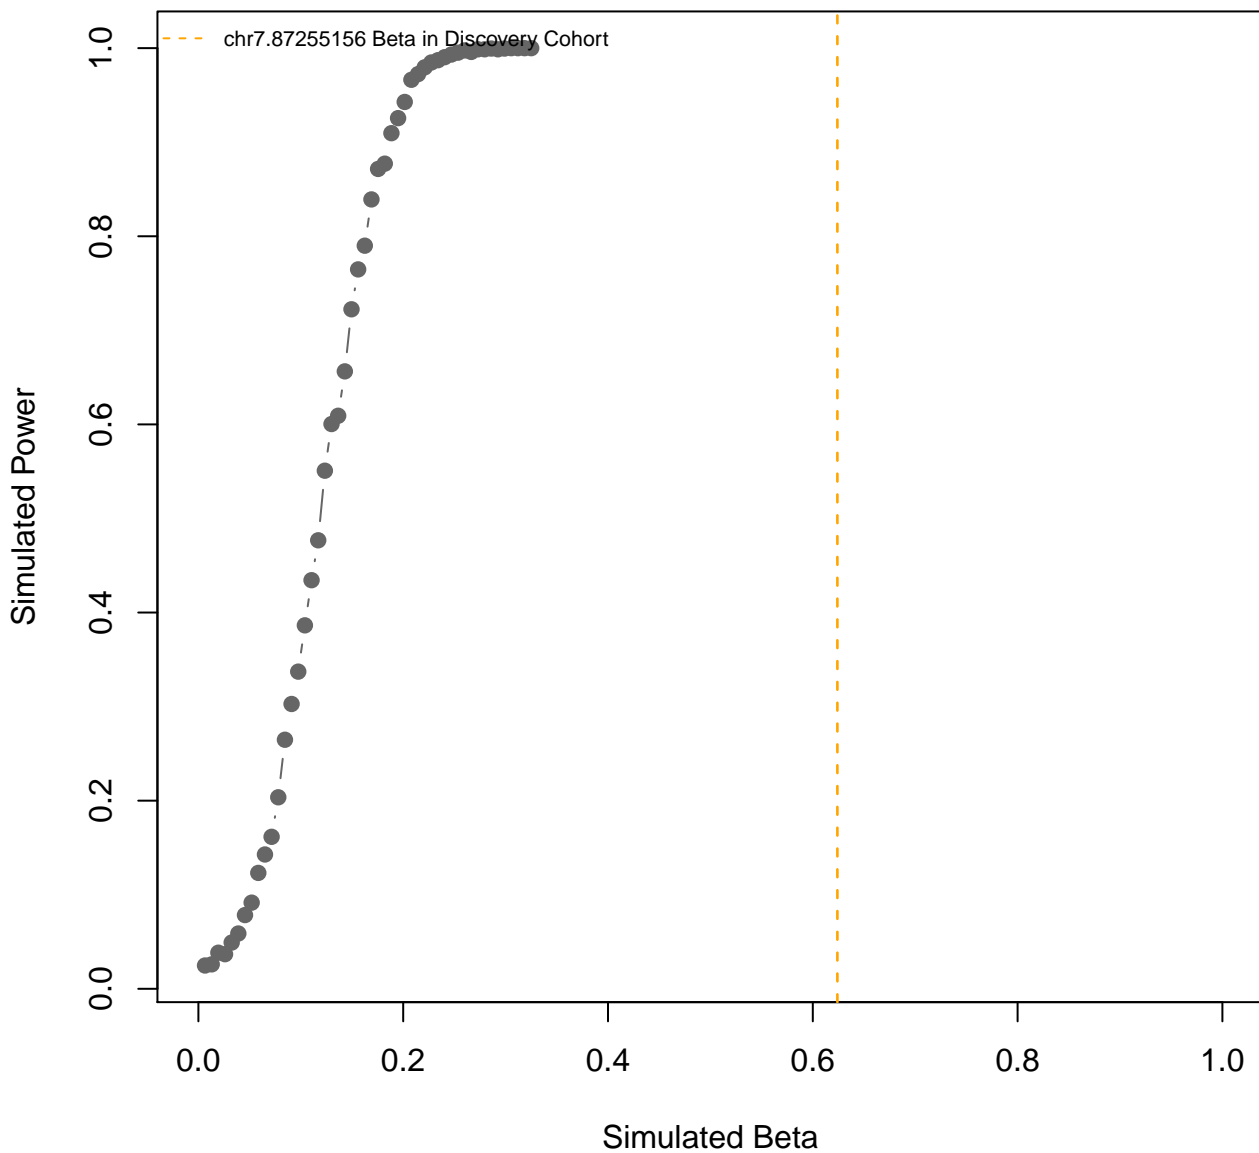

Power simulation in F34, sig. thresh = 0.05 , Coat Color Albino

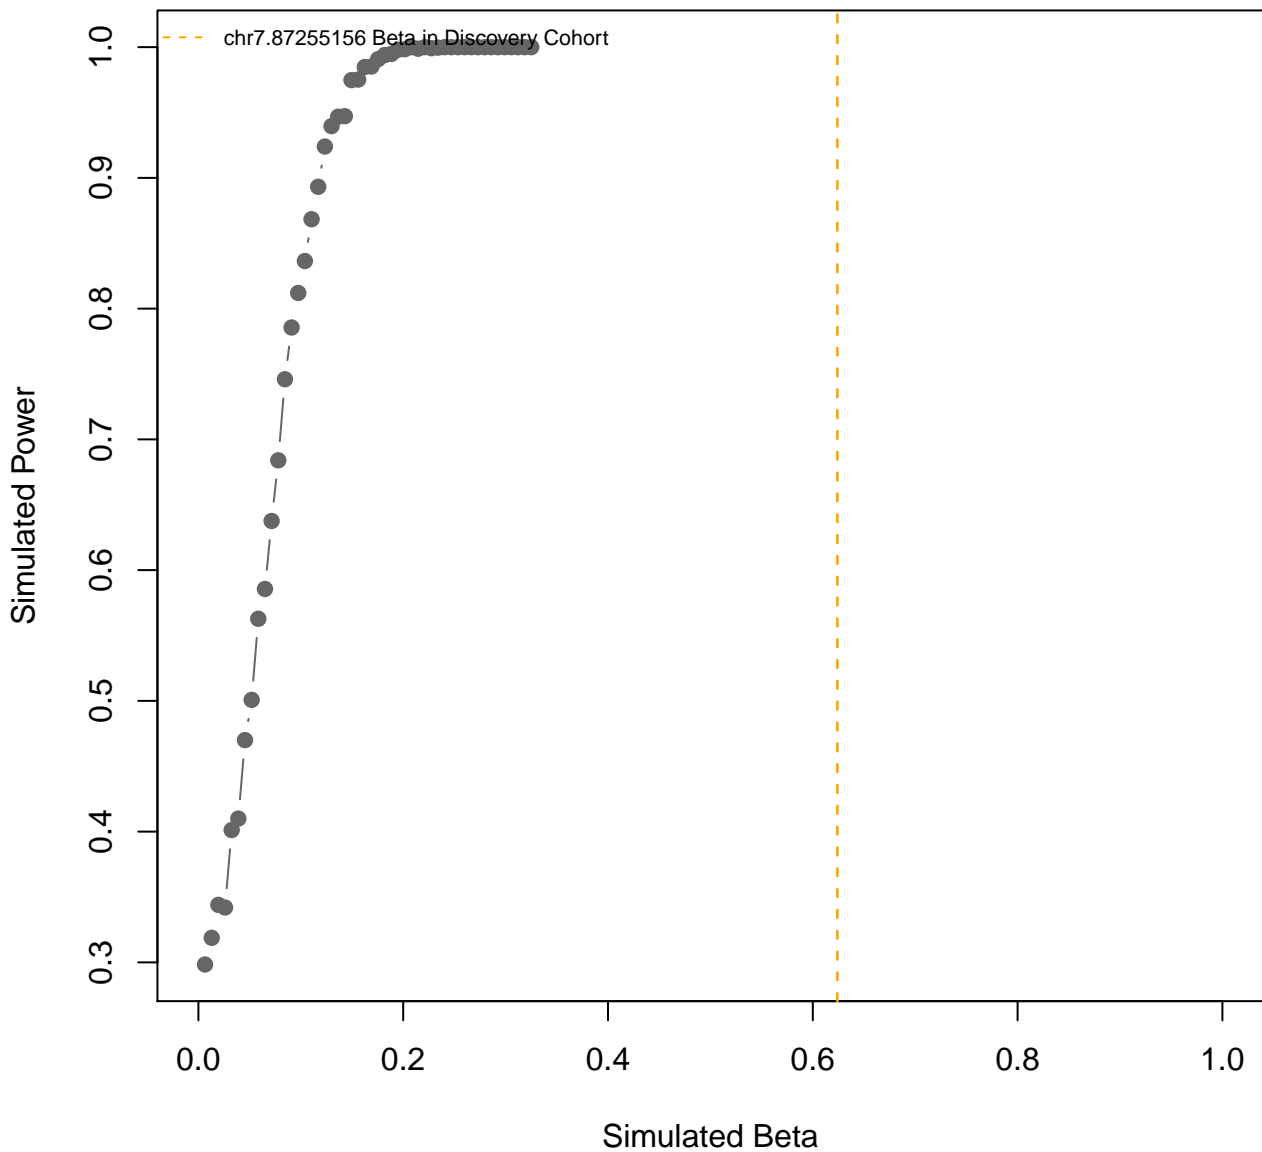

# Power simulation in F34 , Coat Color Agouti

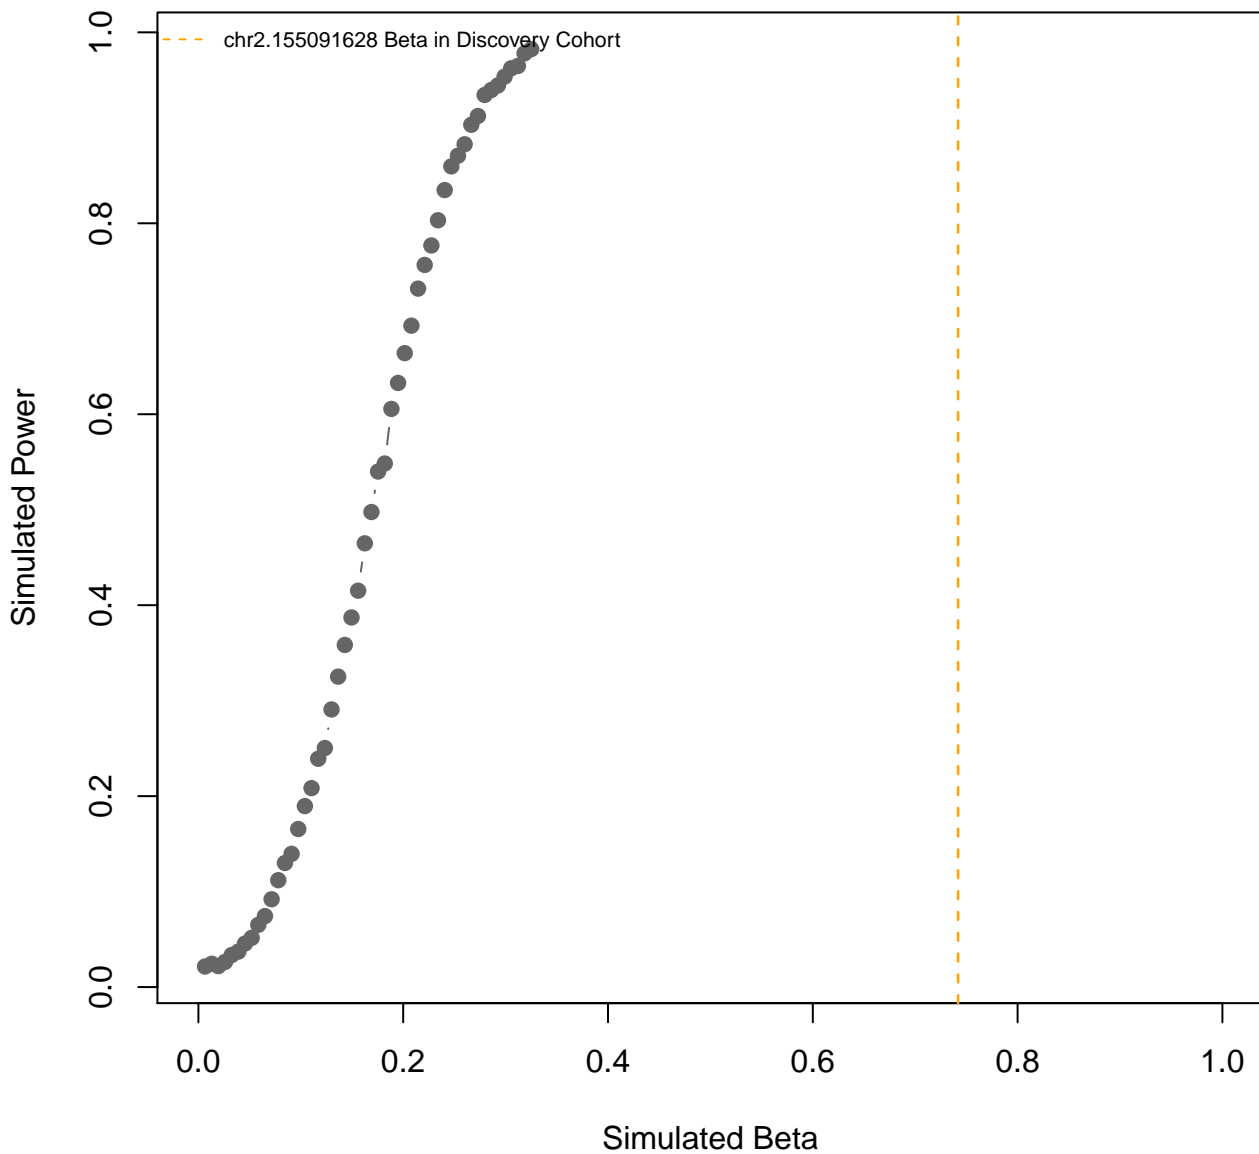

Power simulation in F34, sig. thresh = 0.05 , Coat Color Agouti

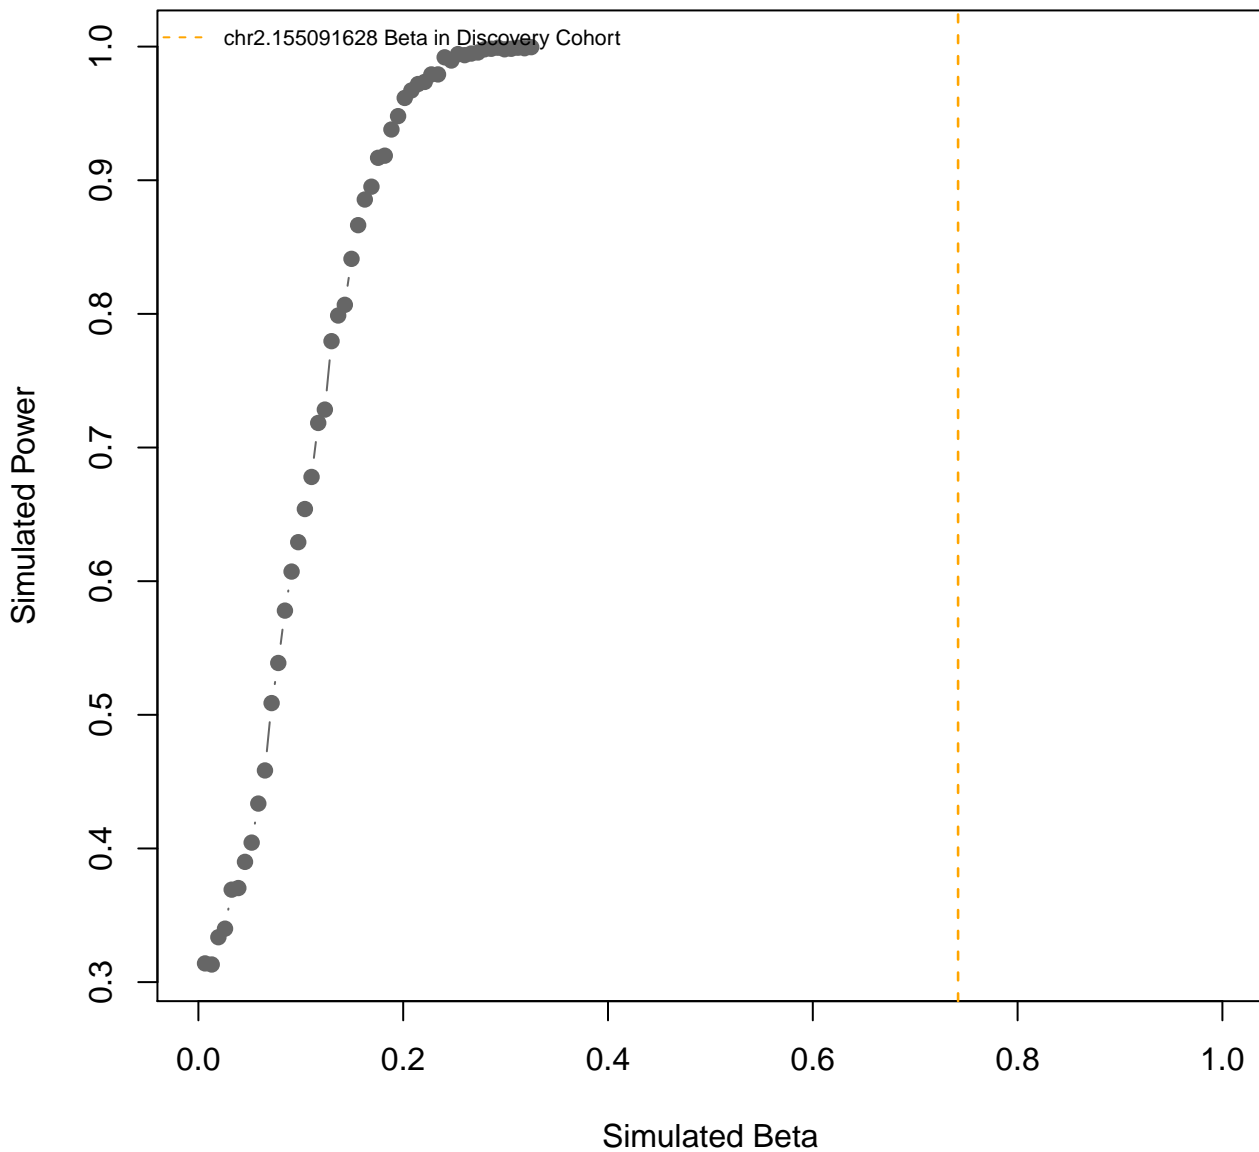



# Power simulation in F34 , Locomotor Day 2

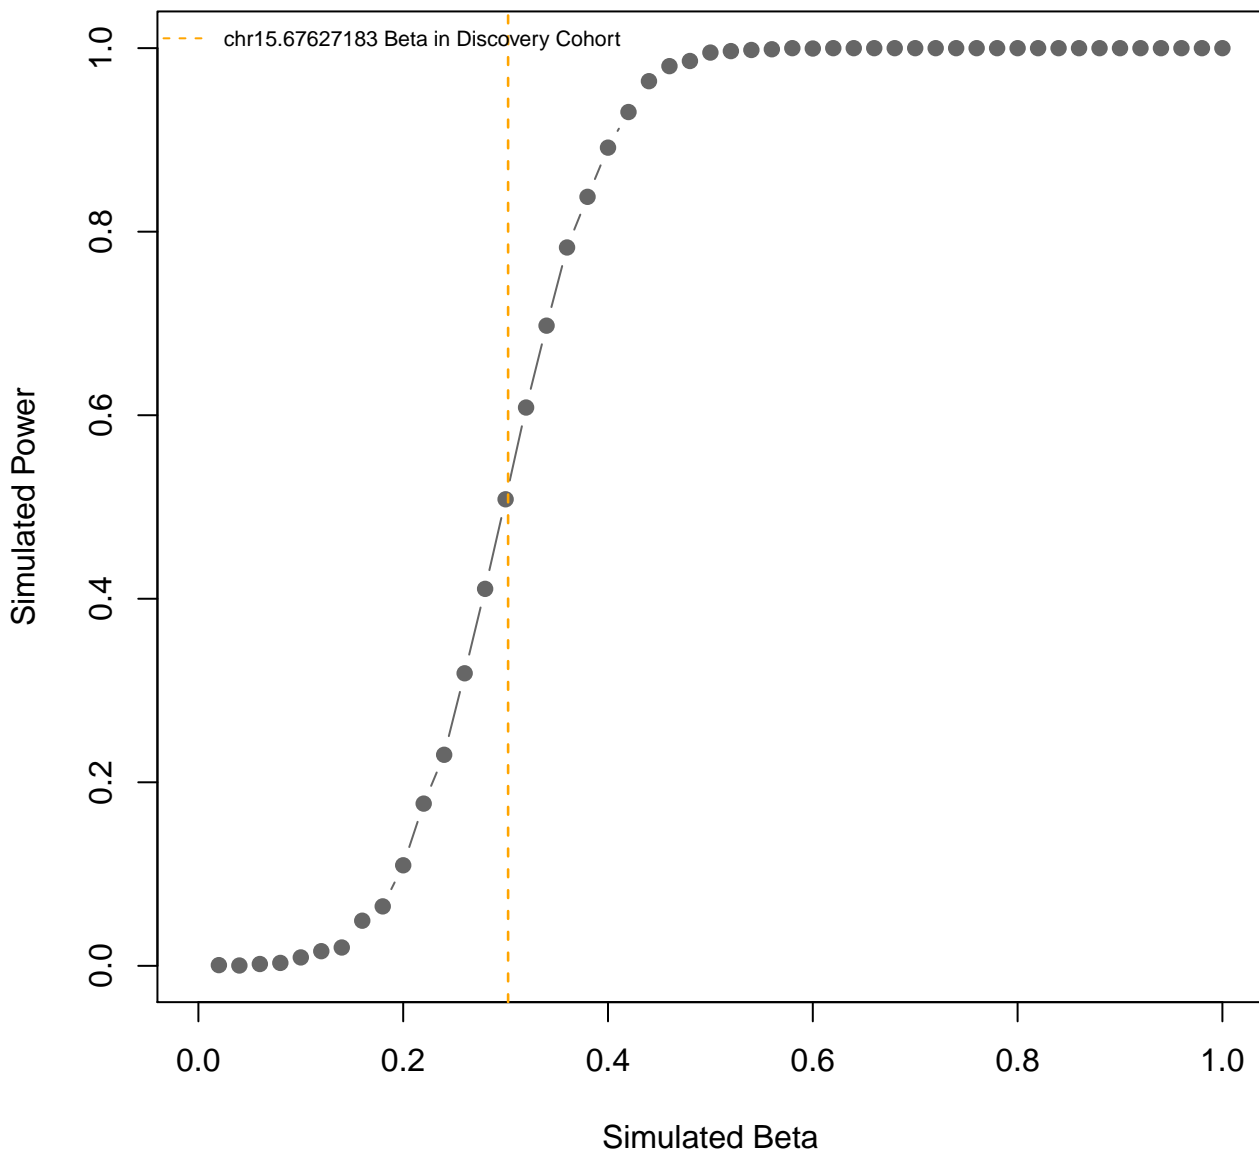

Power simulation in F34, sig. thresh = 0.05 , Locomotor Day 2

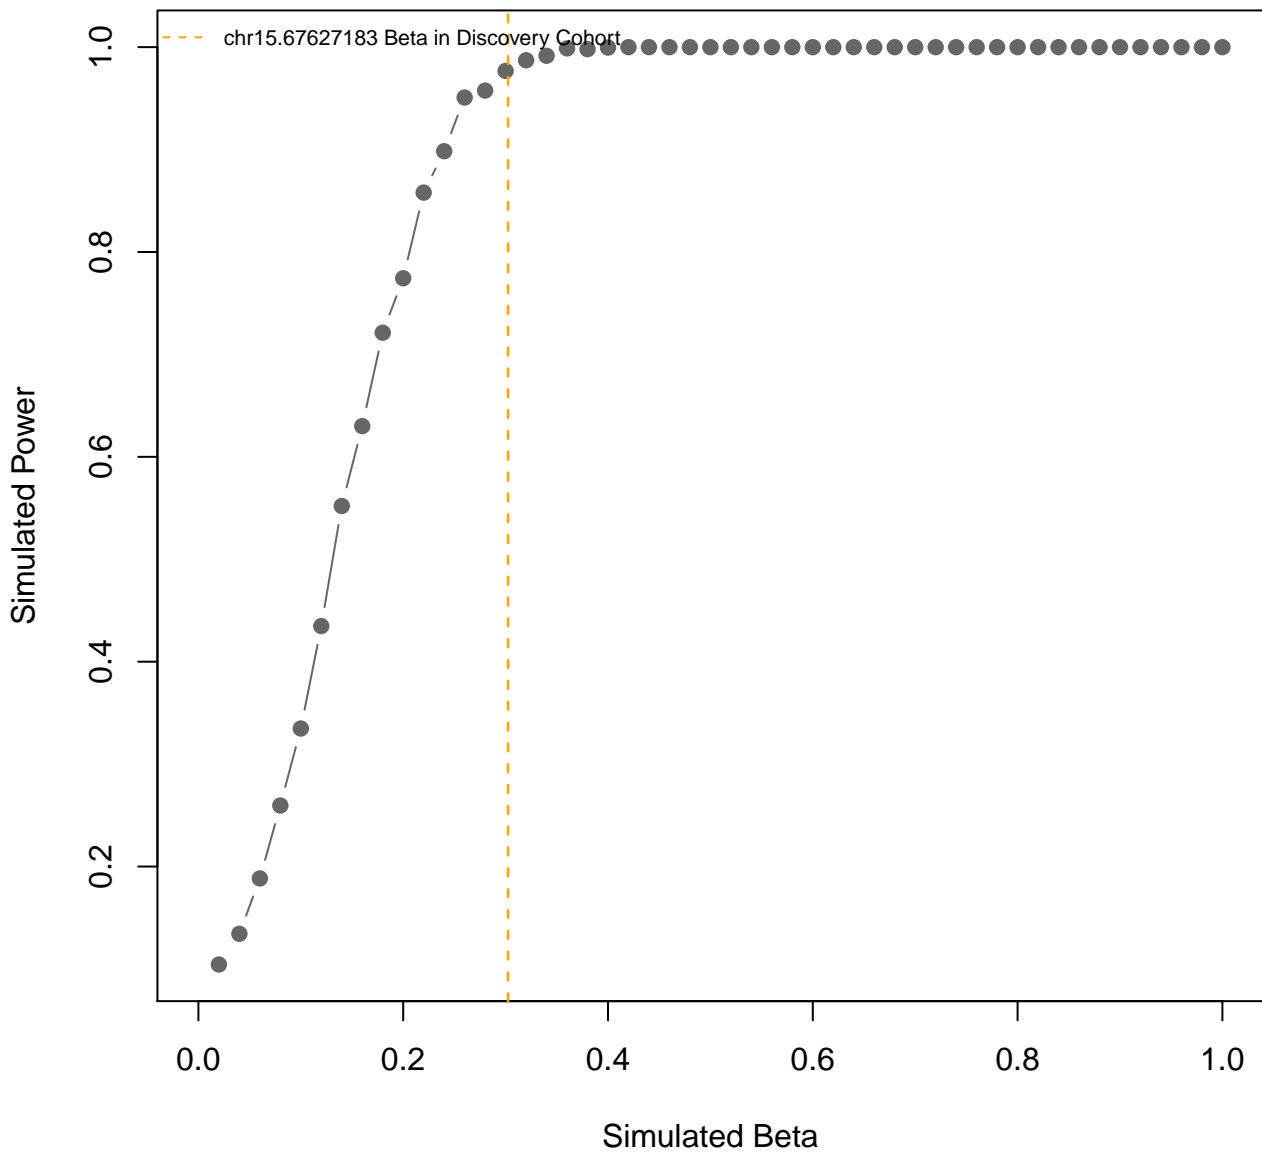

Power simulation in F3943 , Body Weight

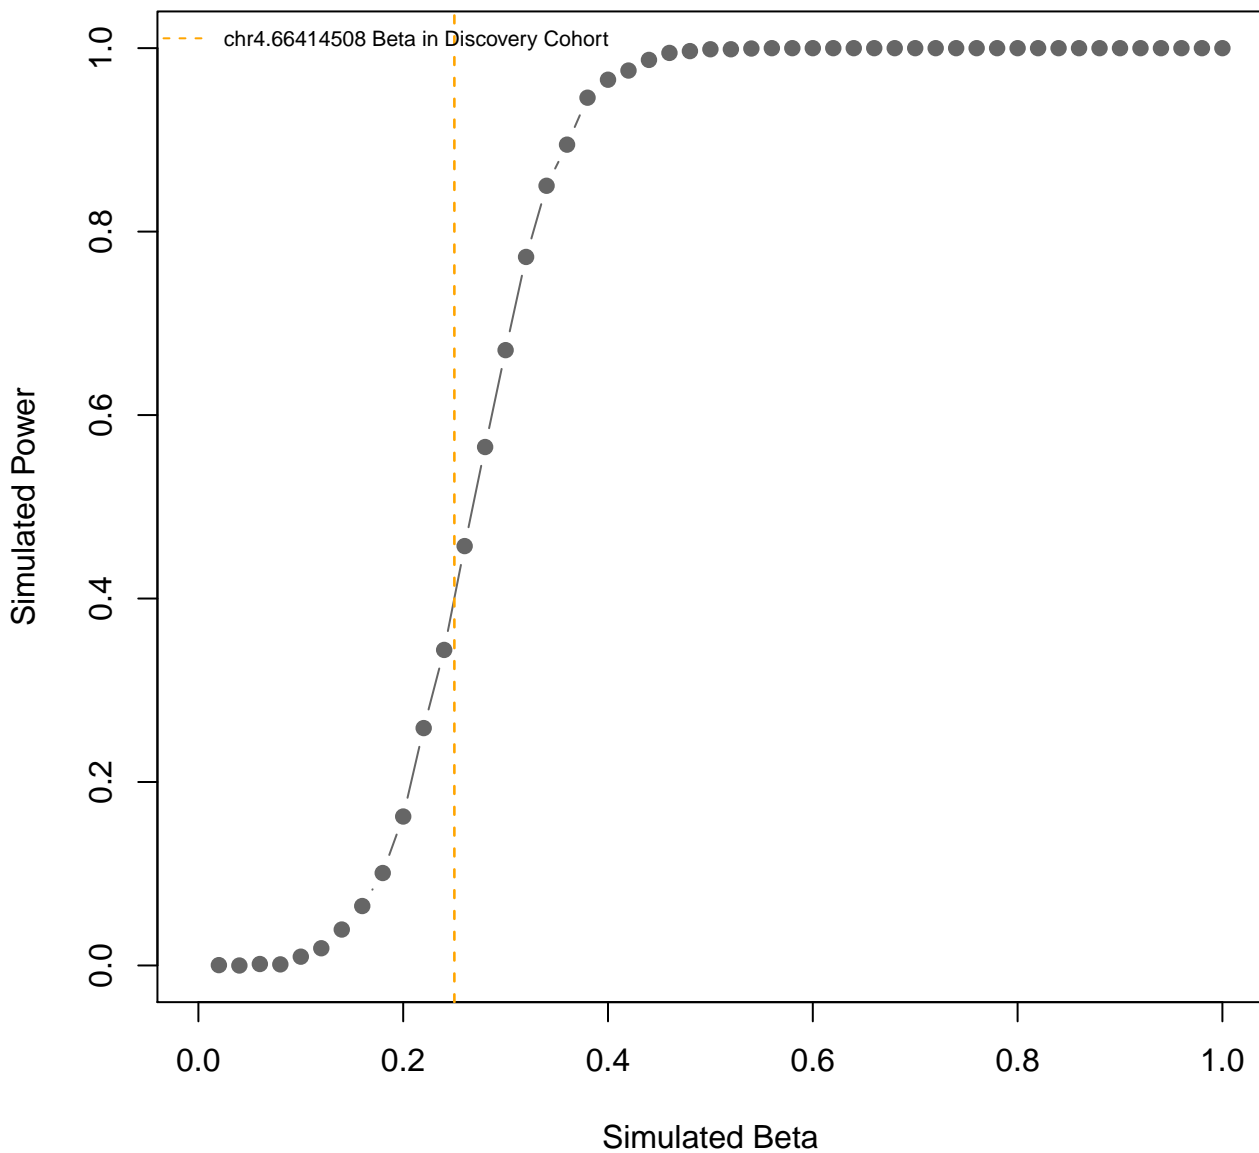

Power simulation in F3943, sig. thresh = 0.05 , Body Weight

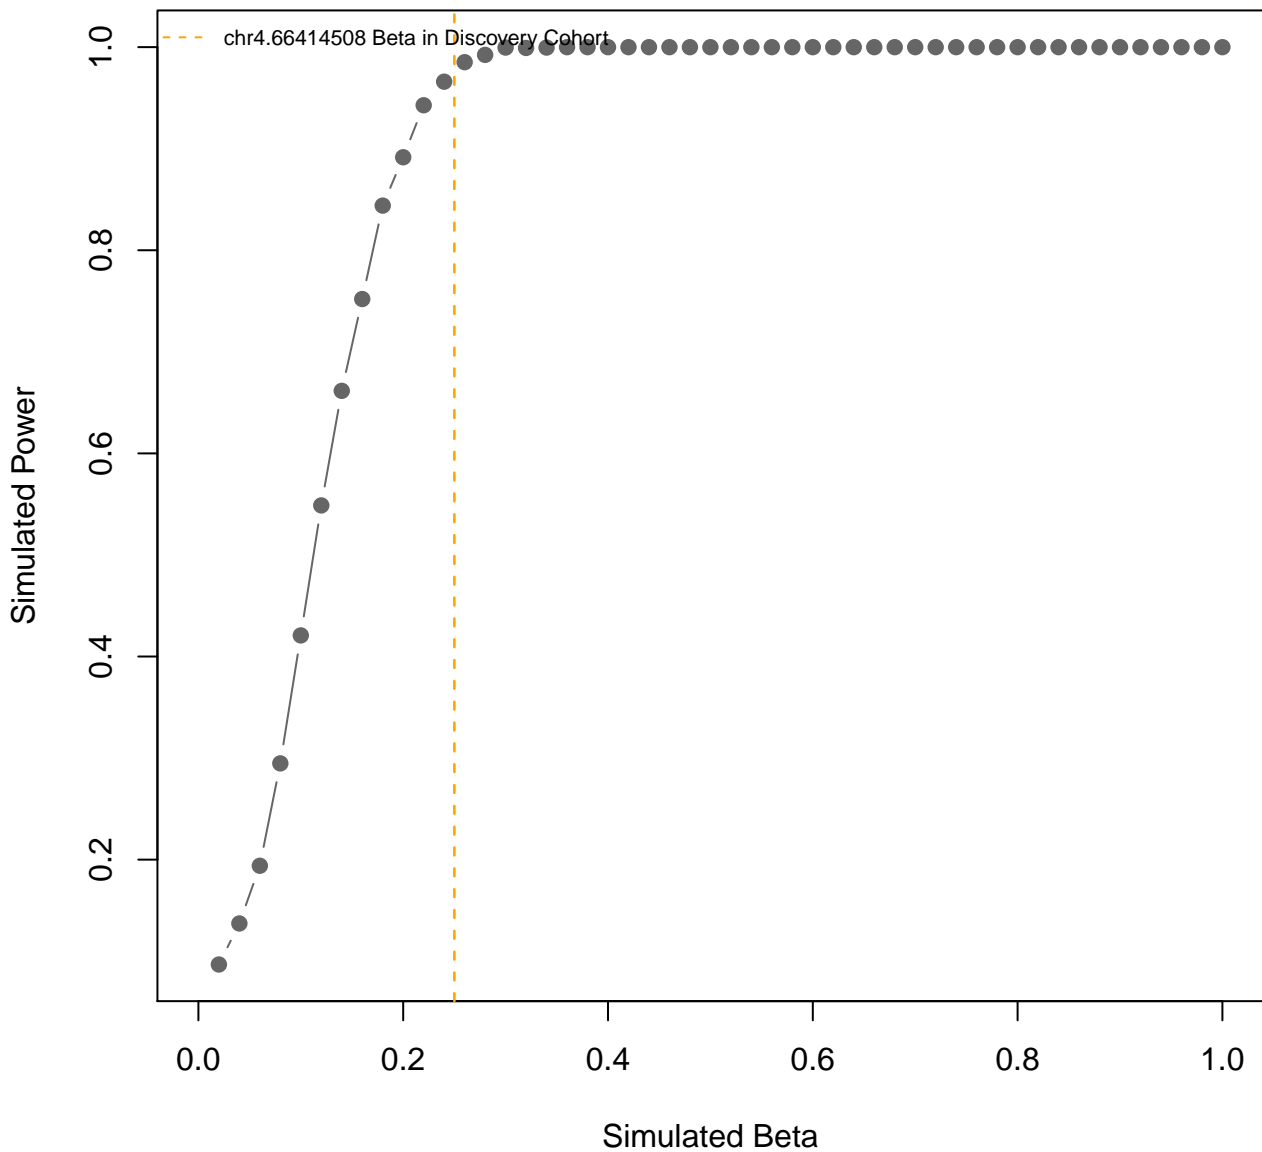

### Power simulation in F3943 , Body Weight

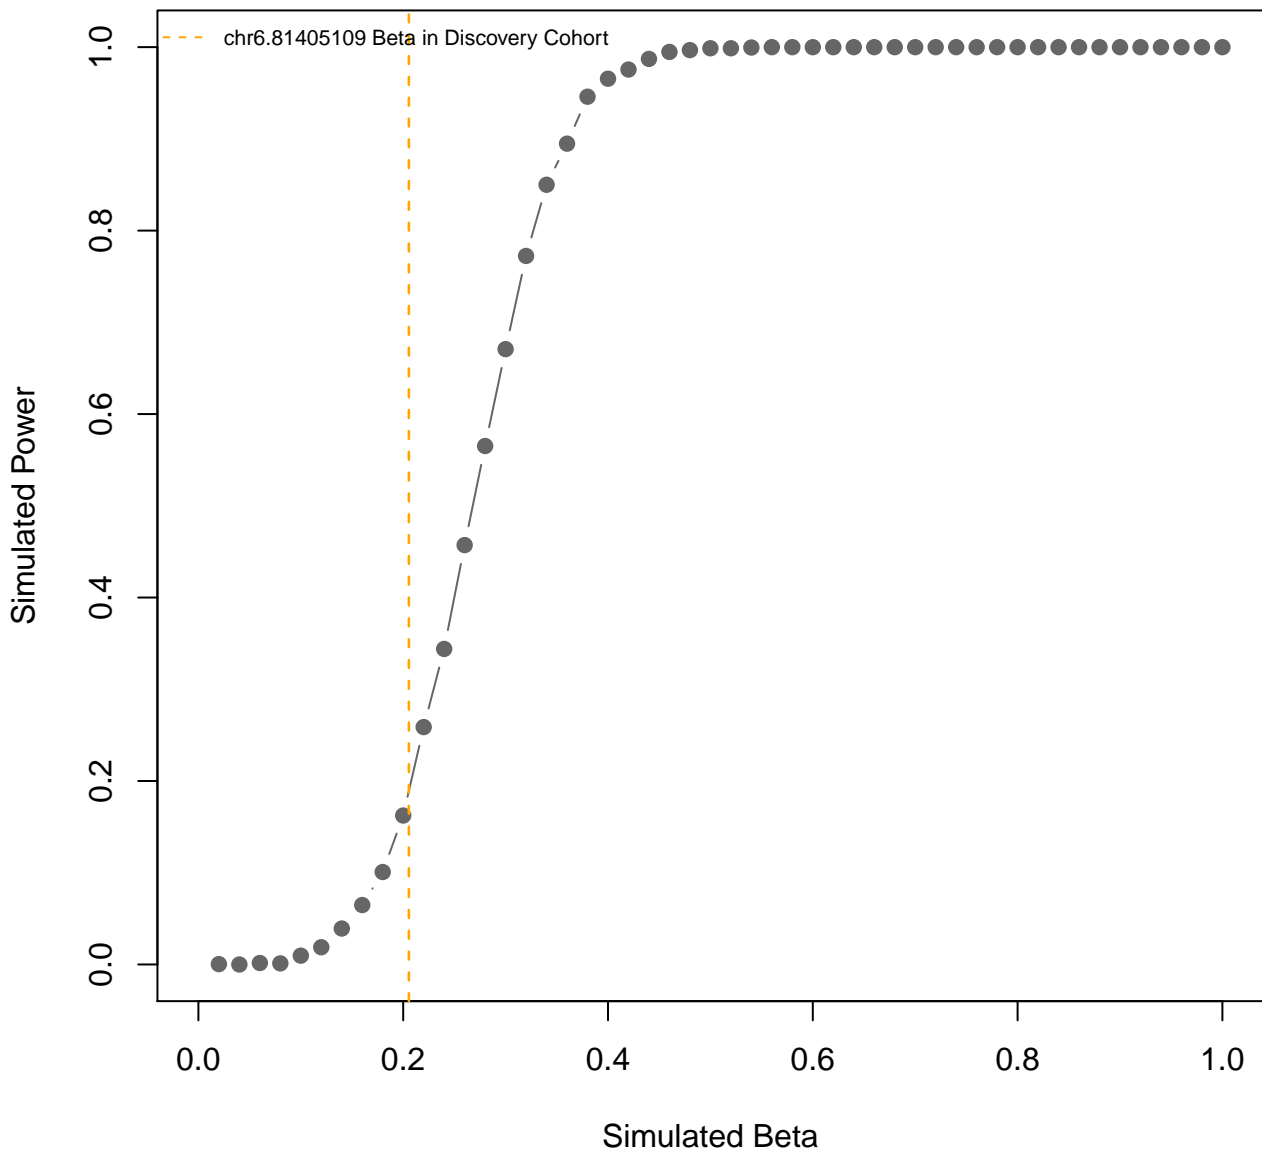

Power simulation in F3943, sig. thresh = 0.05 , Body Weight

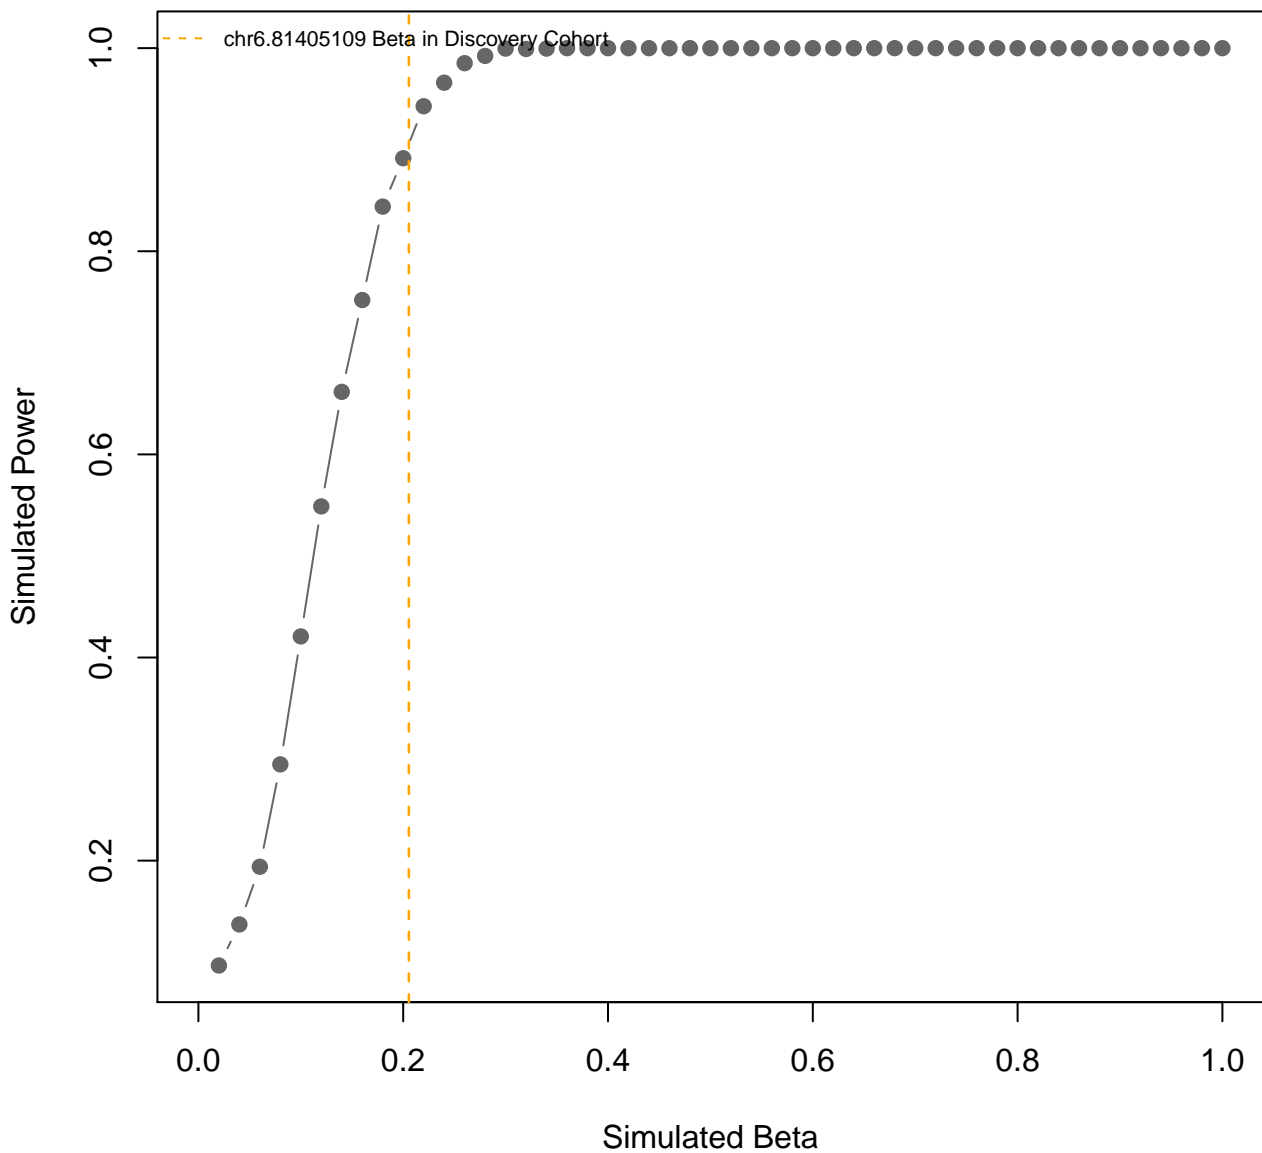

# Power simulation in F3943 , Body Weight

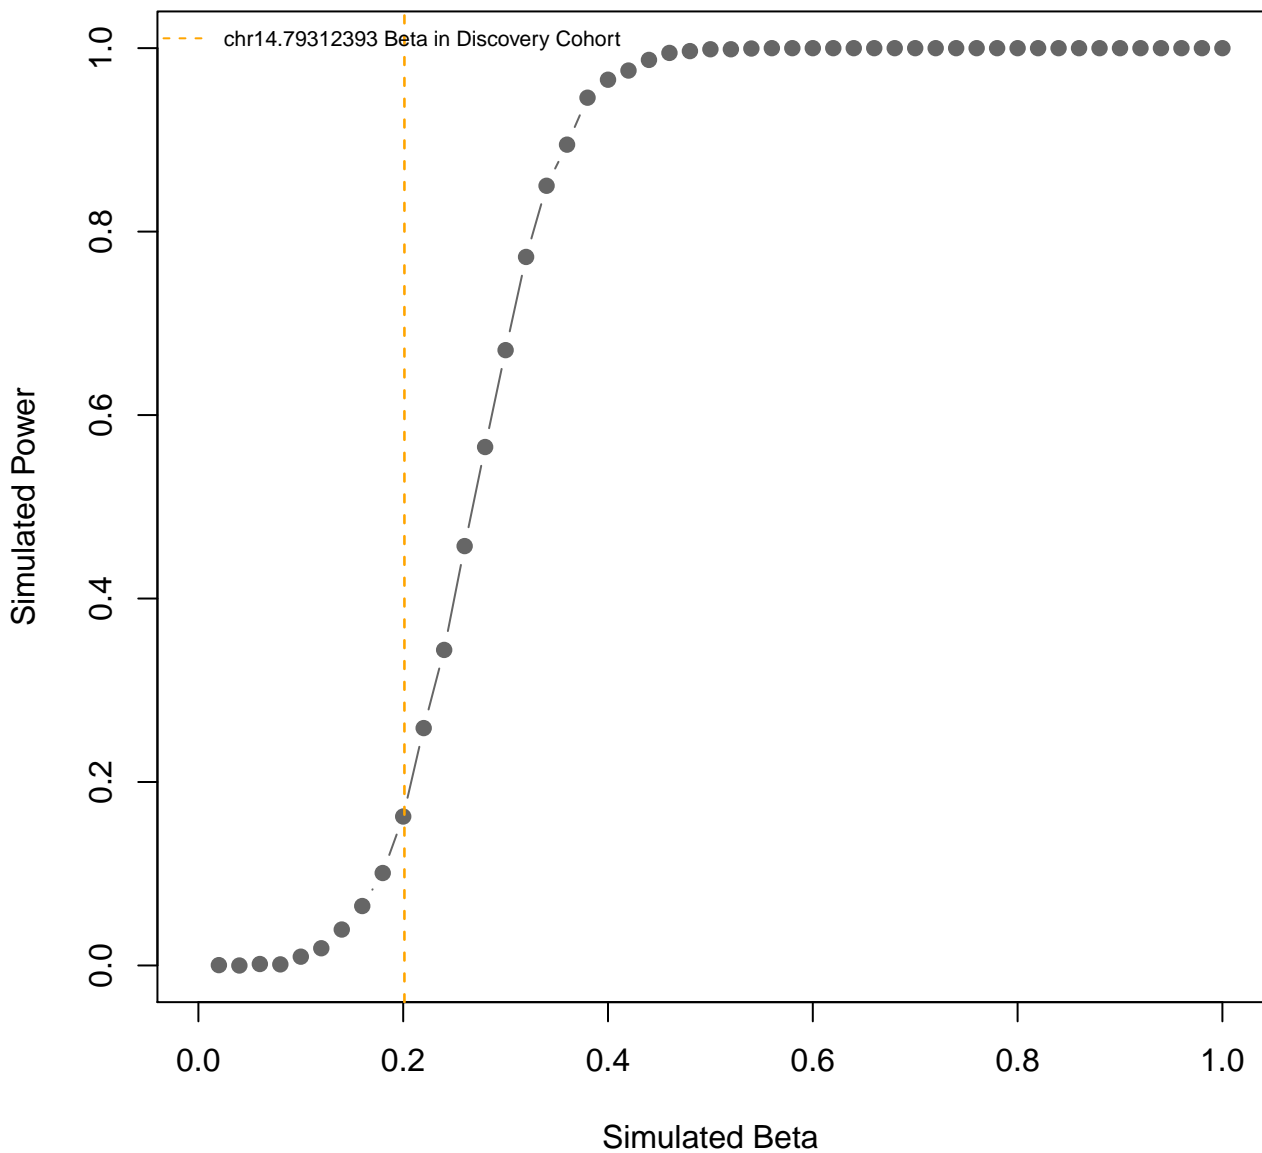

Power simulation in F3943, sig. thresh = 0.05 , Body Weight

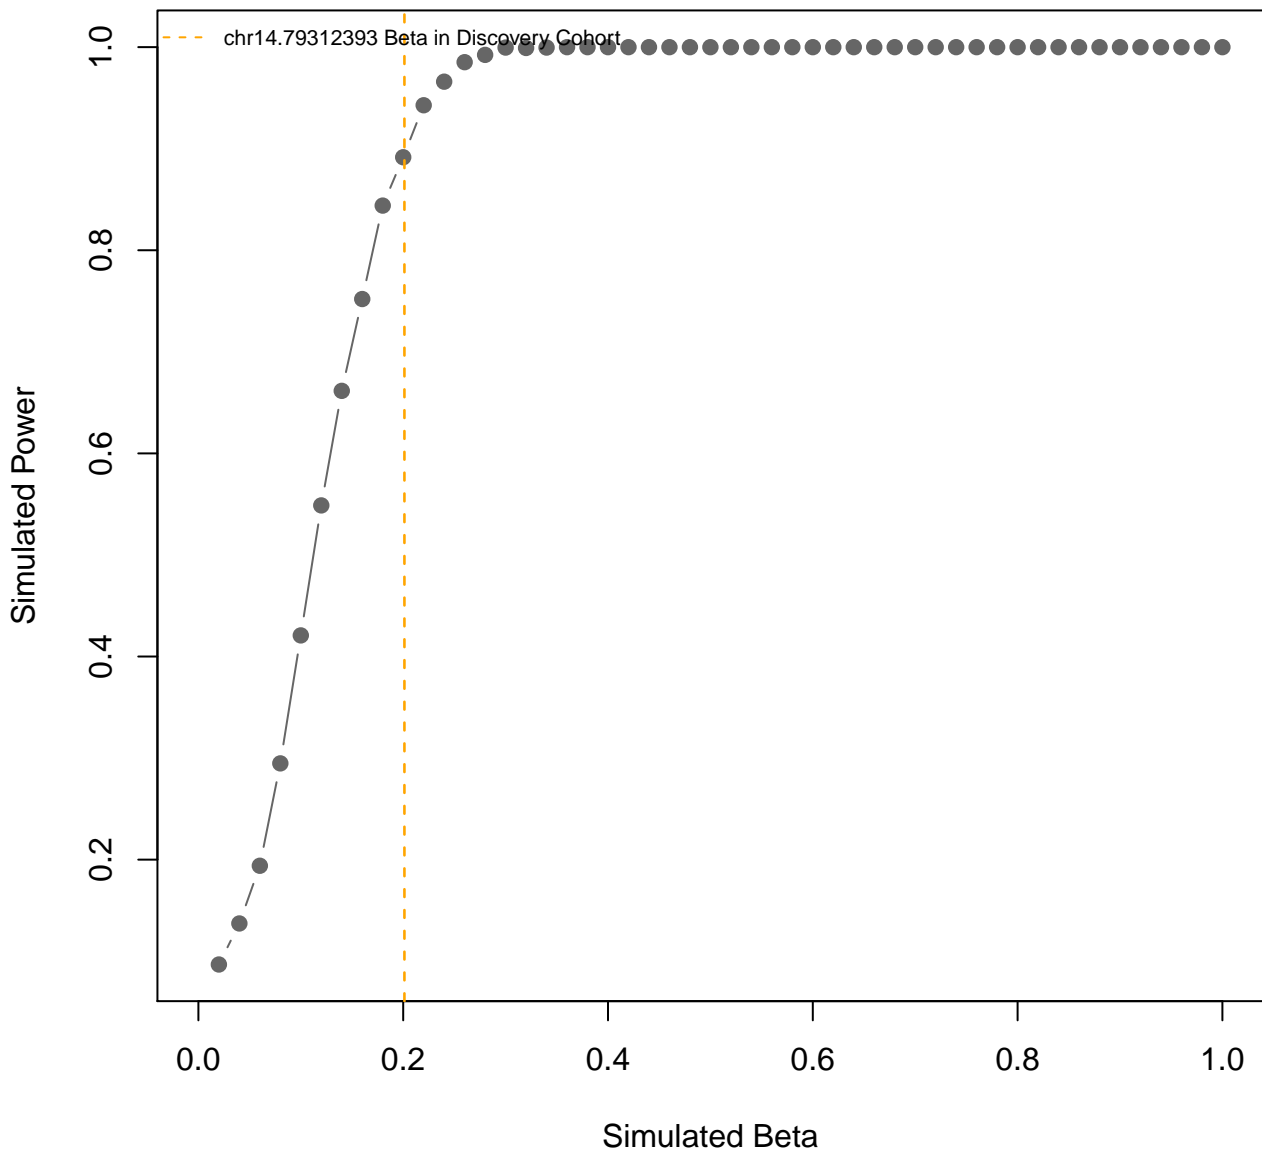



# Power simulation in F3943 , Coat Color Albino

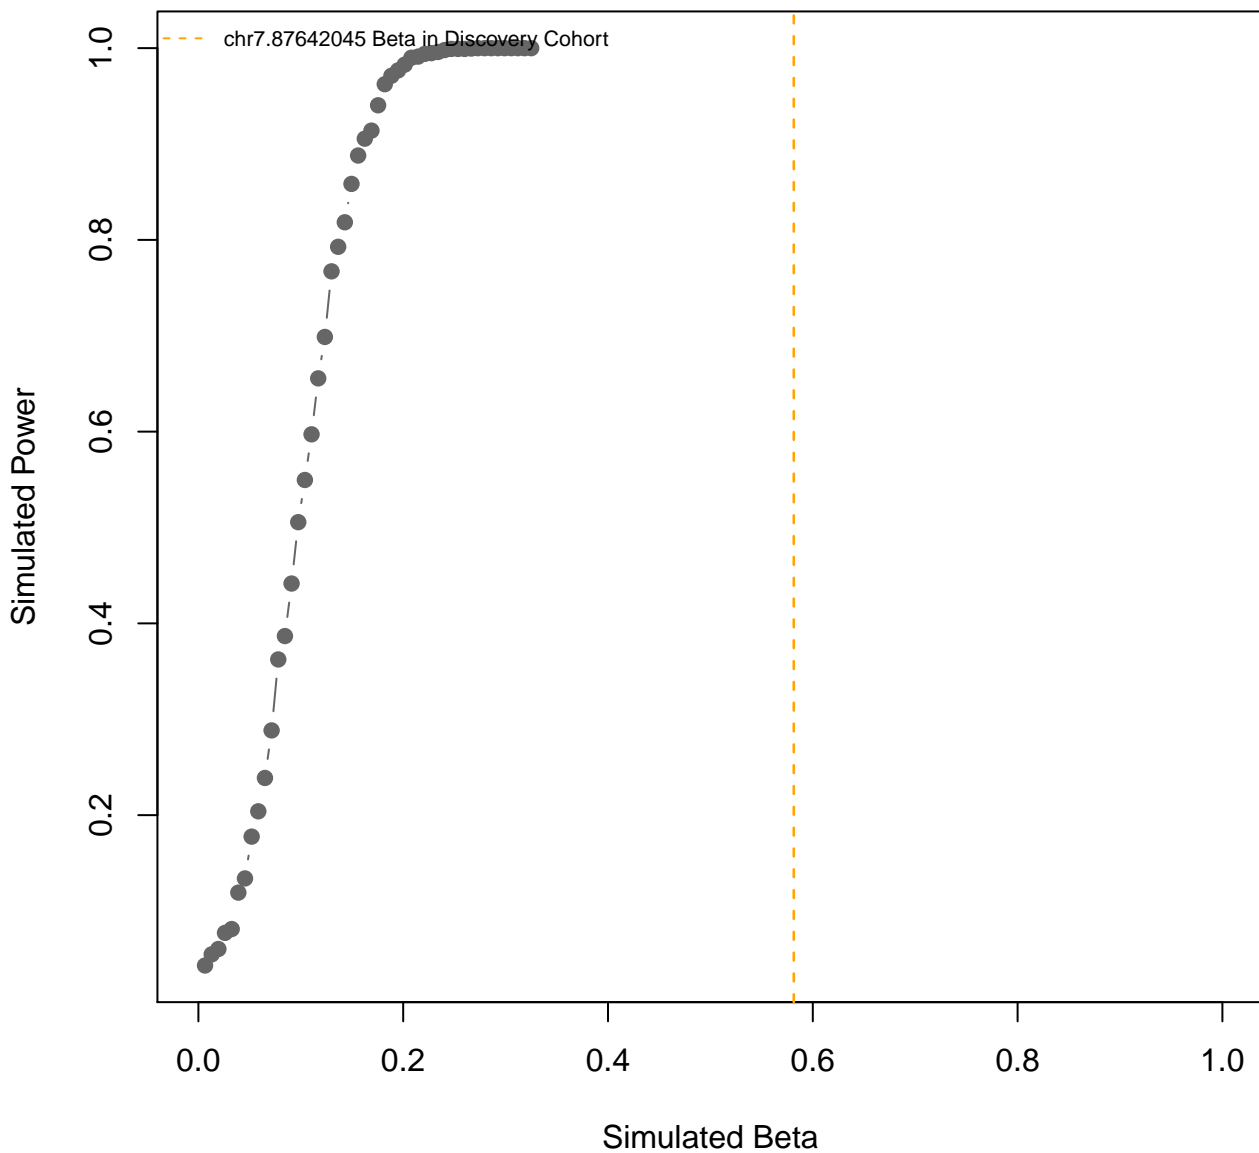

Power simulation in F3943, sig. thresh = 0.05 , Coat Color Albino

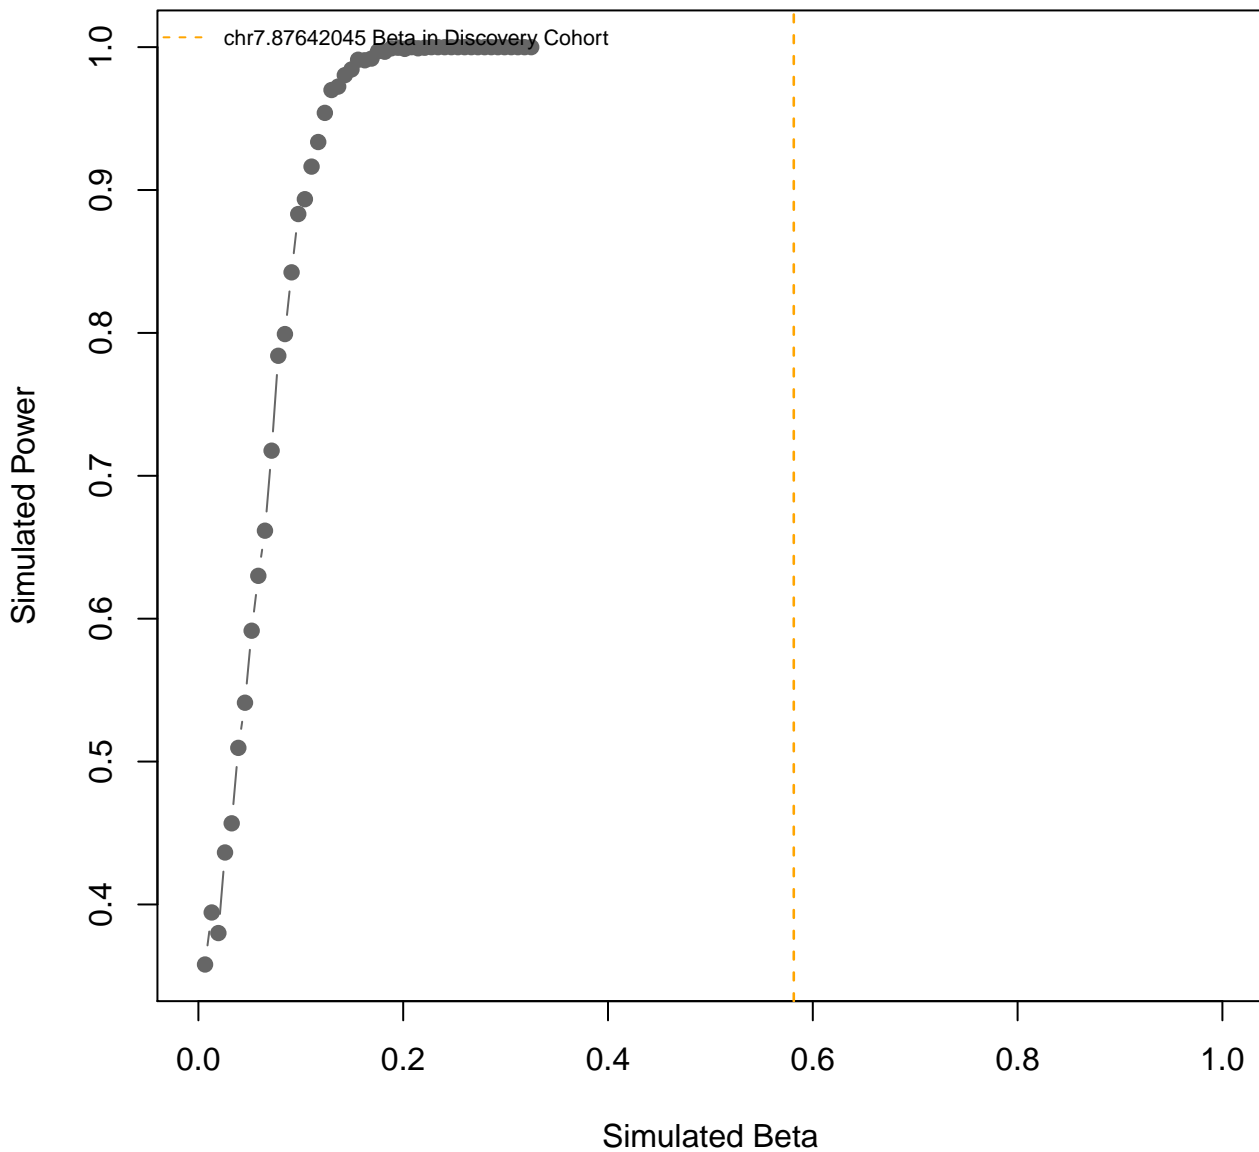

# Power simulation in F3943 , Coat Color Agouti

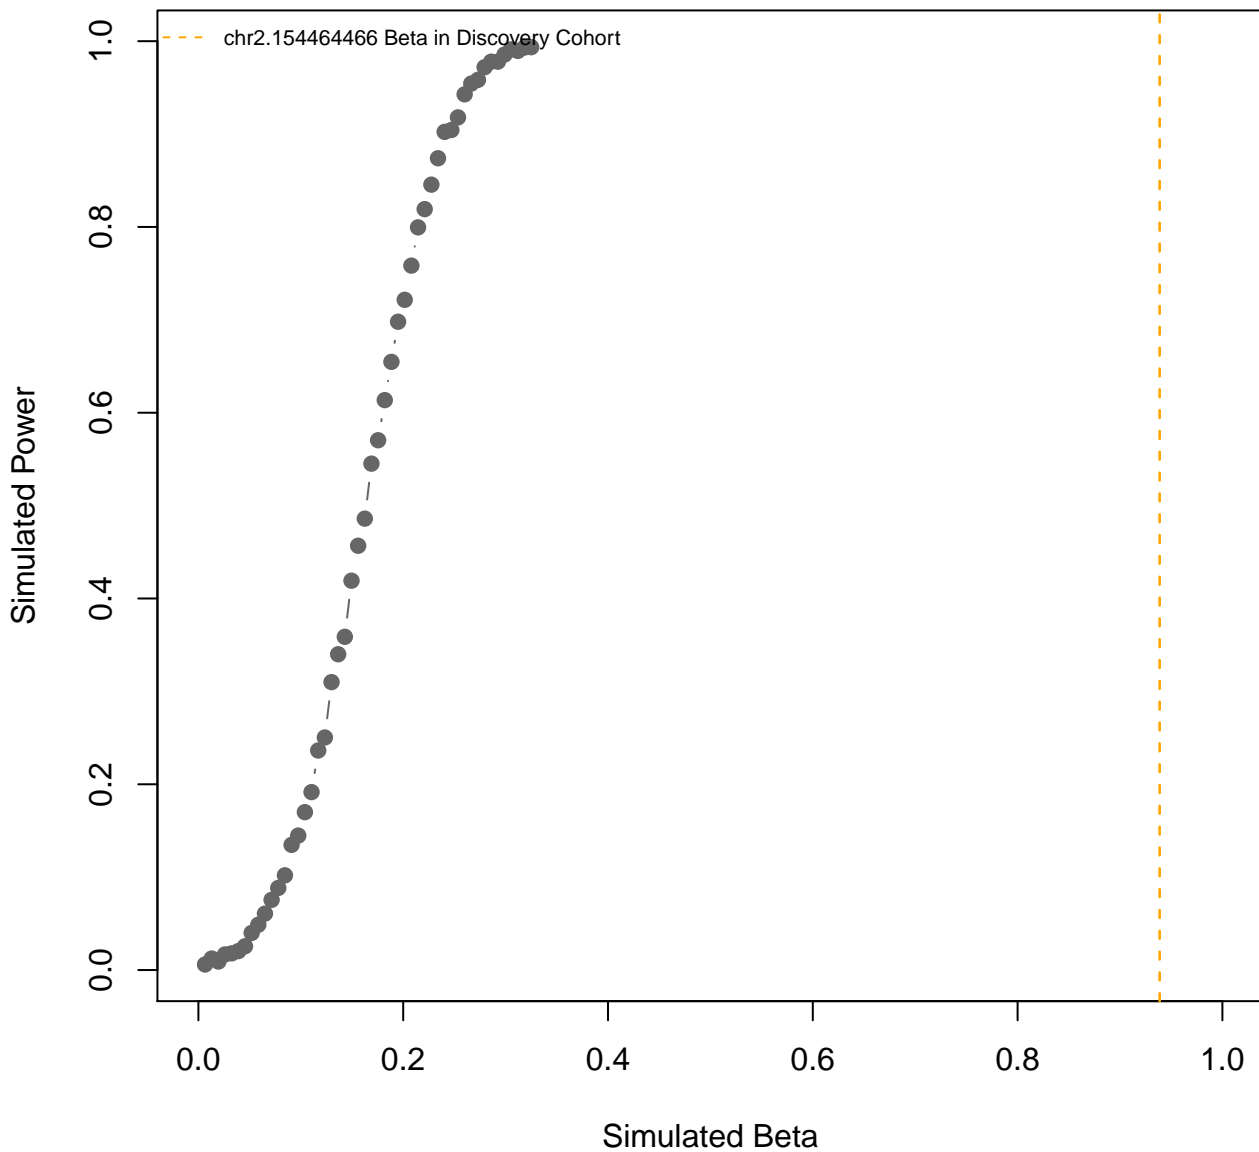

Power simulation in F3943, sig. thresh = 0.05 , Coat Color Agouti

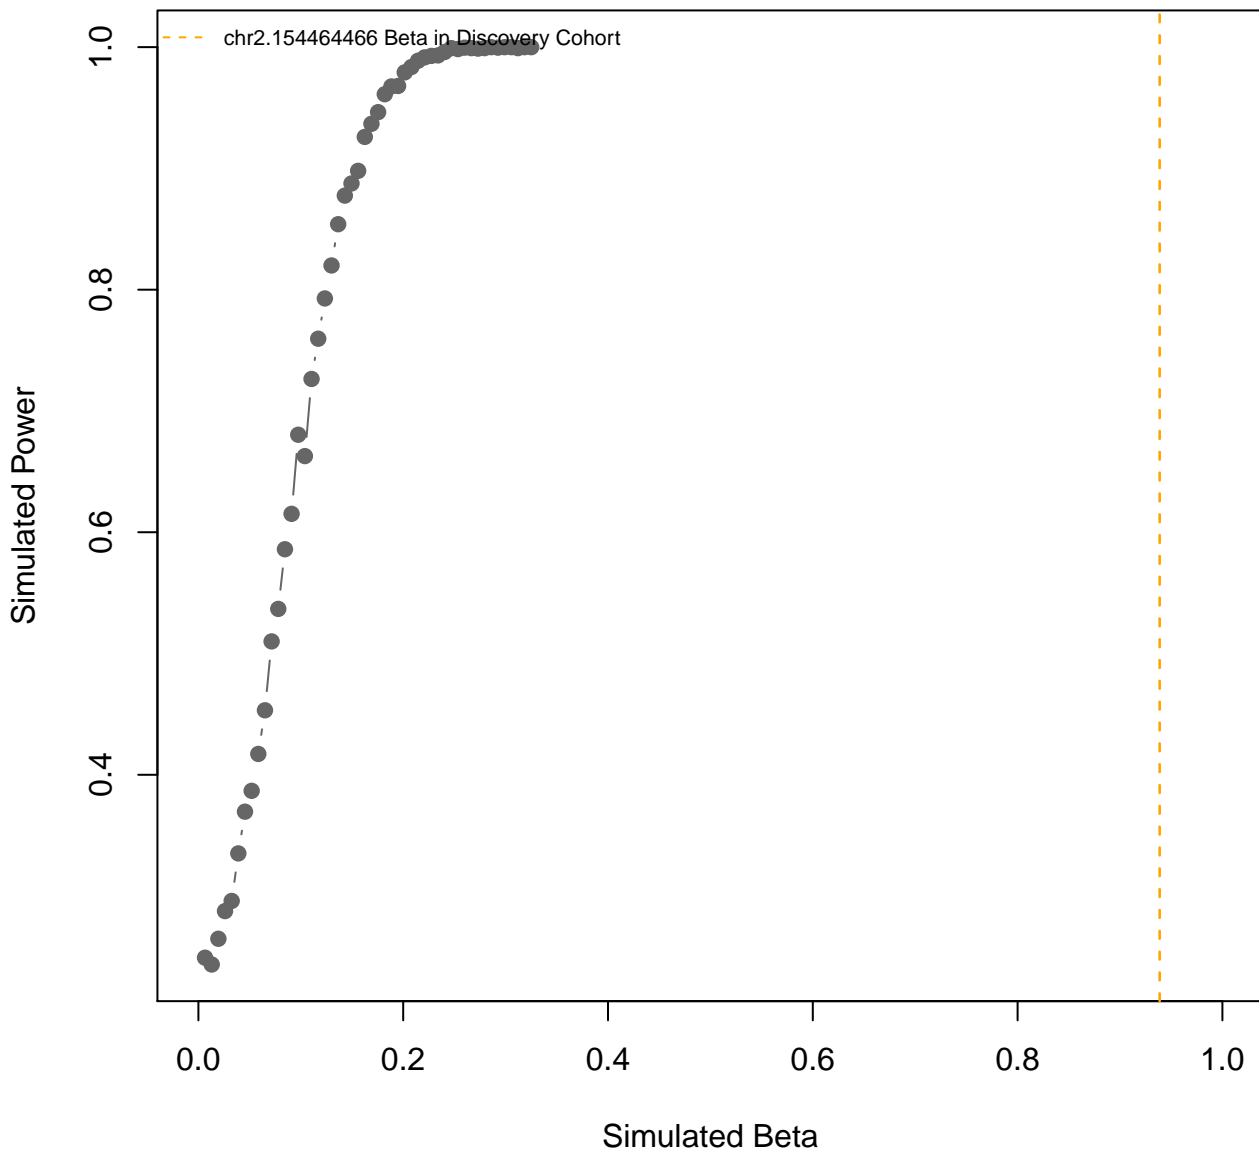

# Power simulation in F3943 , Locomotor Day 1

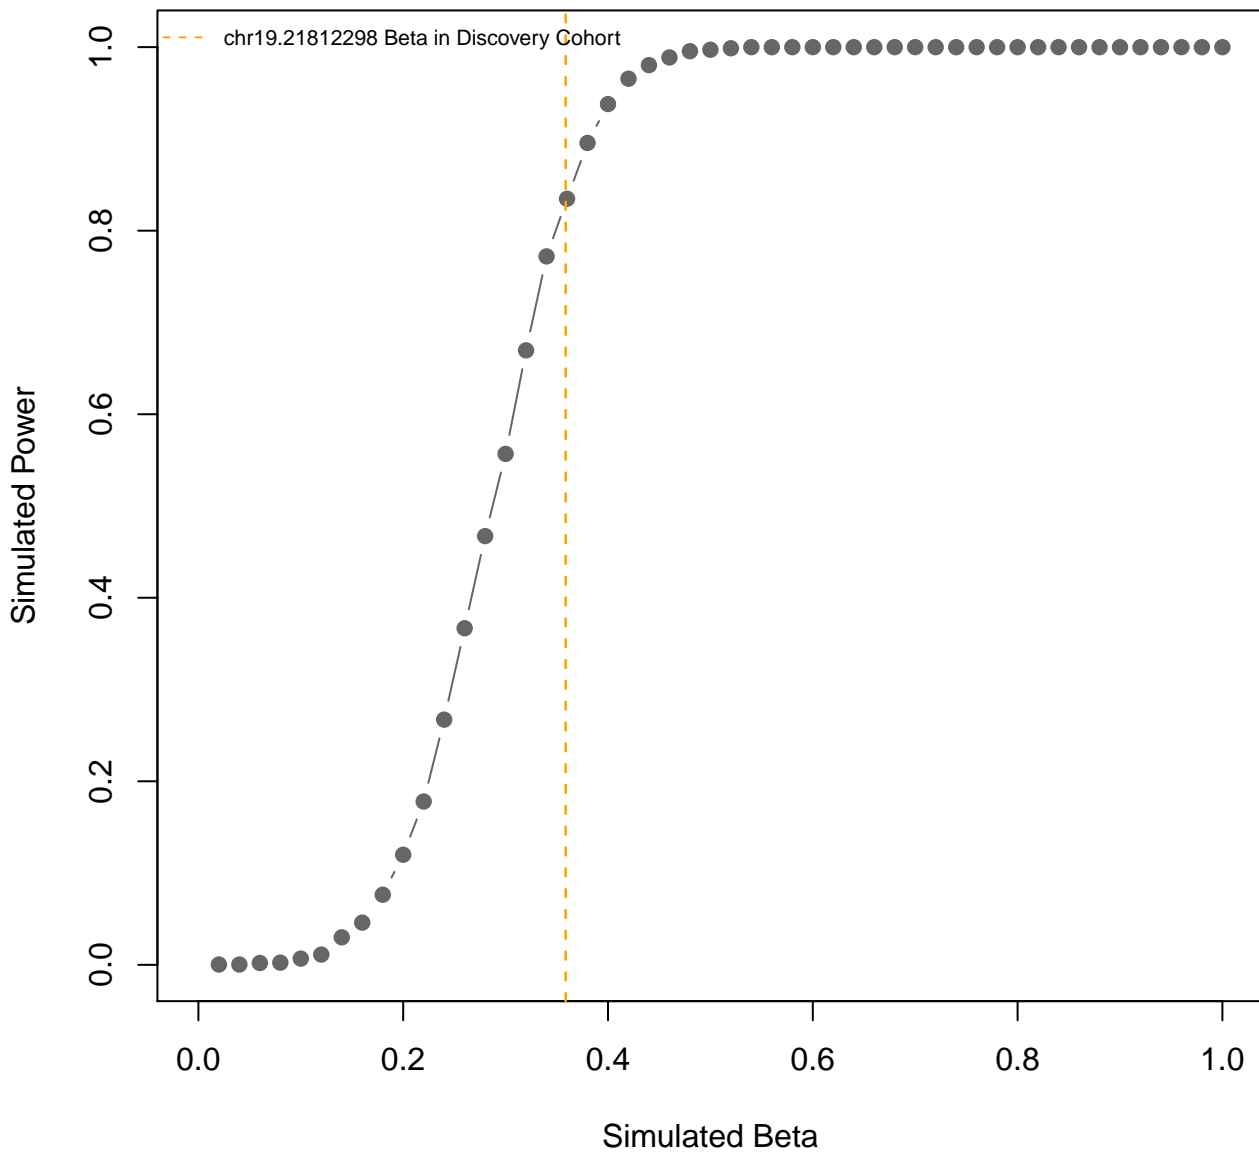

Power simulation in F3943, sig. thresh = 0.05 , Locomotor Day 1

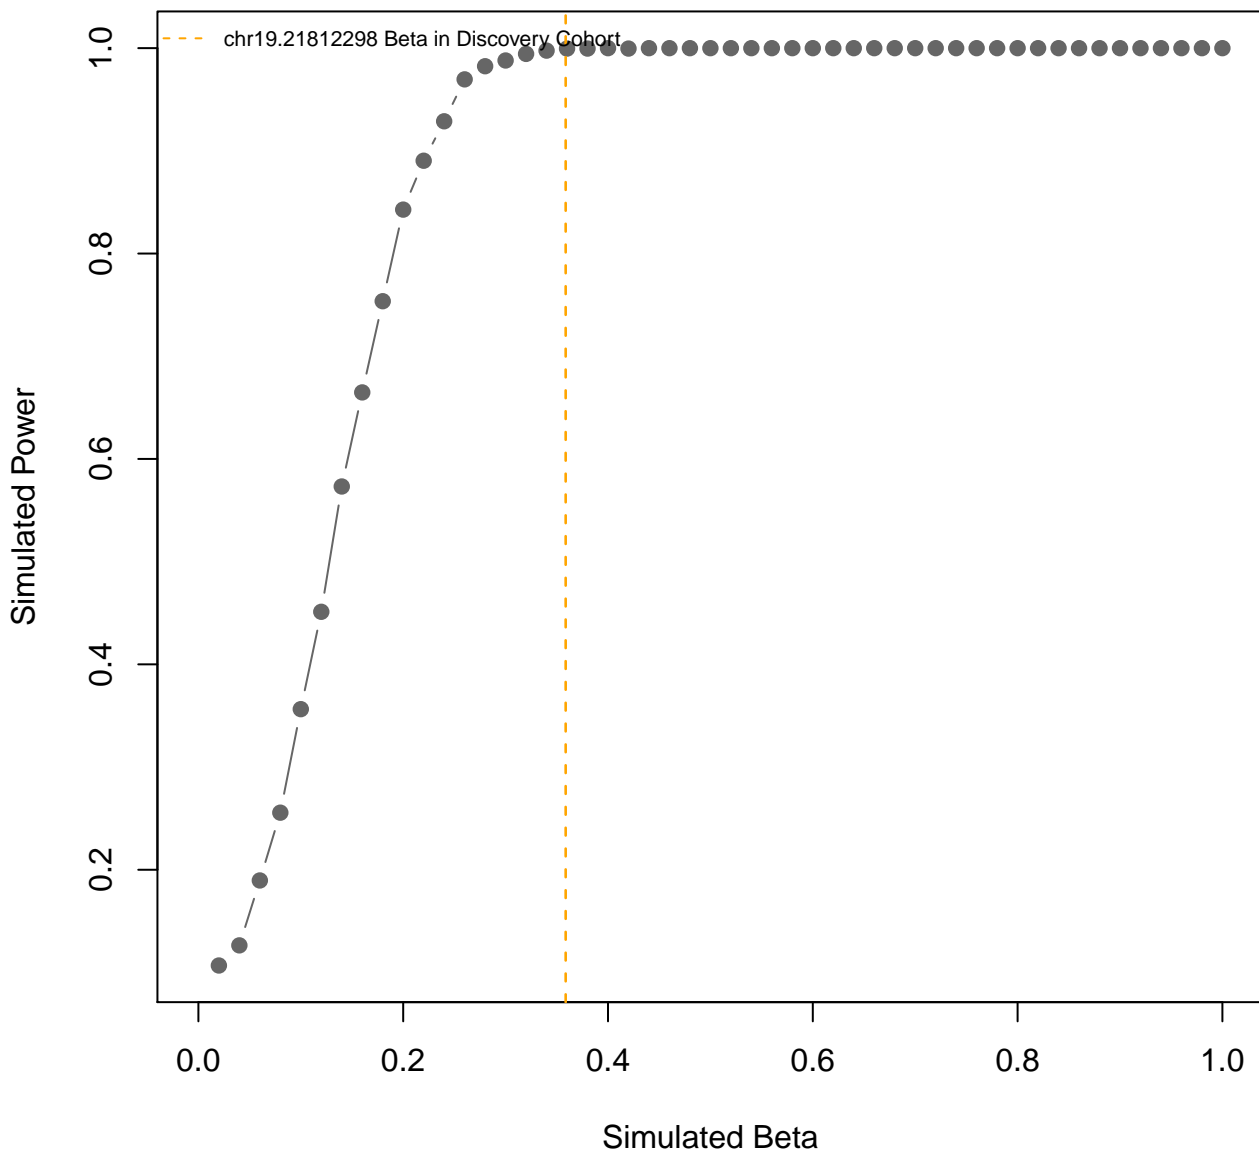

# Power simulation in F3943 , Locomotor Day 2

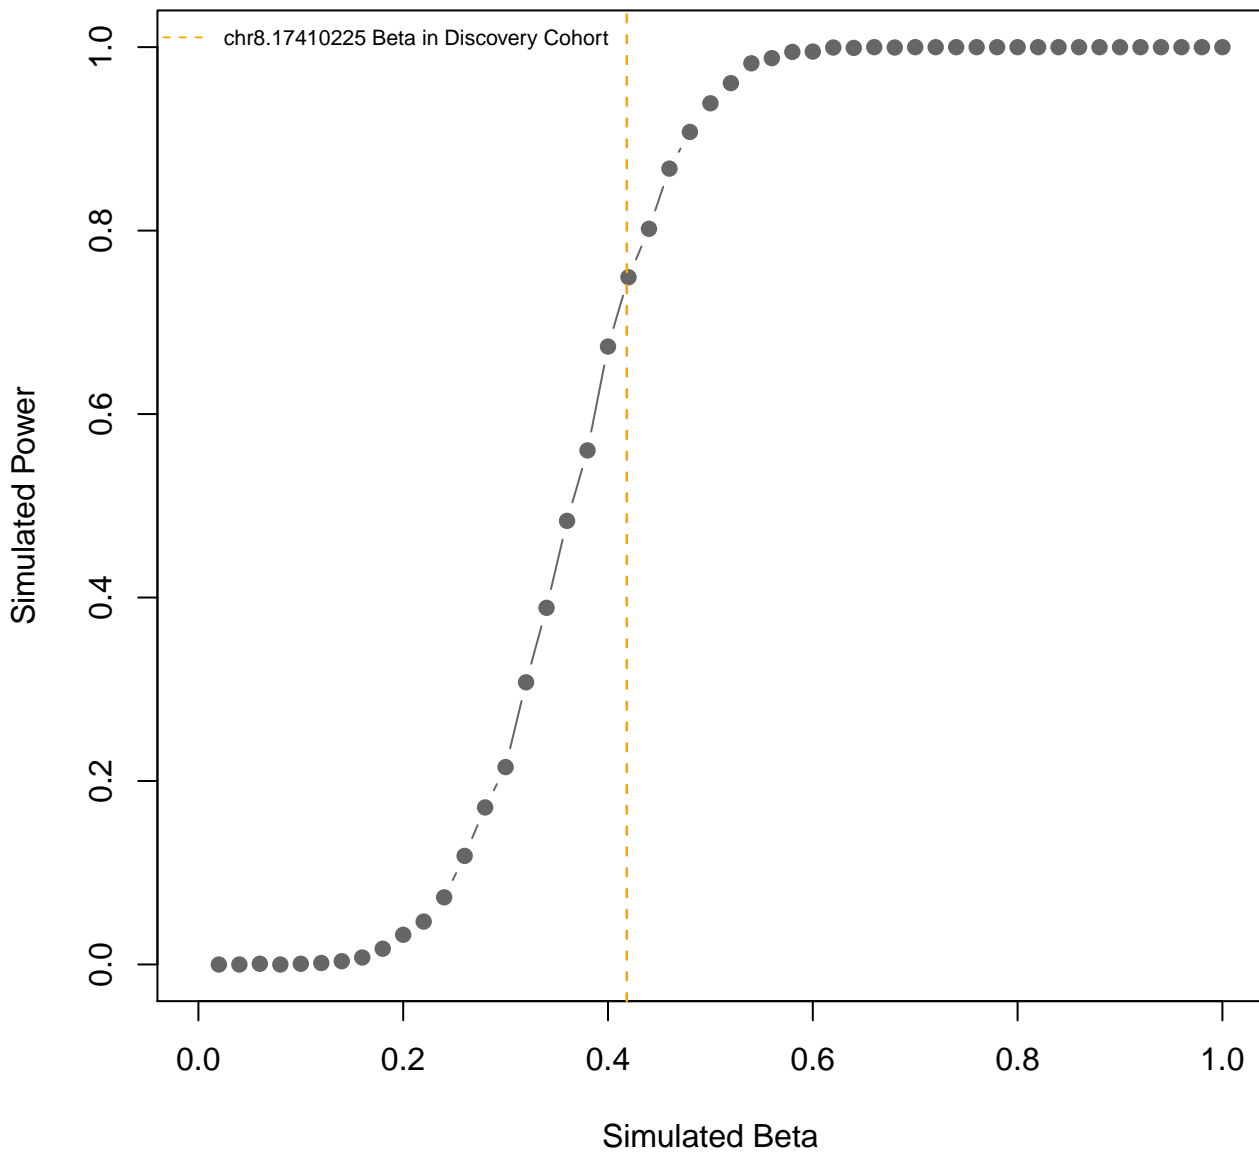

Power simulation in F3943, sig. thresh = 0.05 , Locomotor Day 2

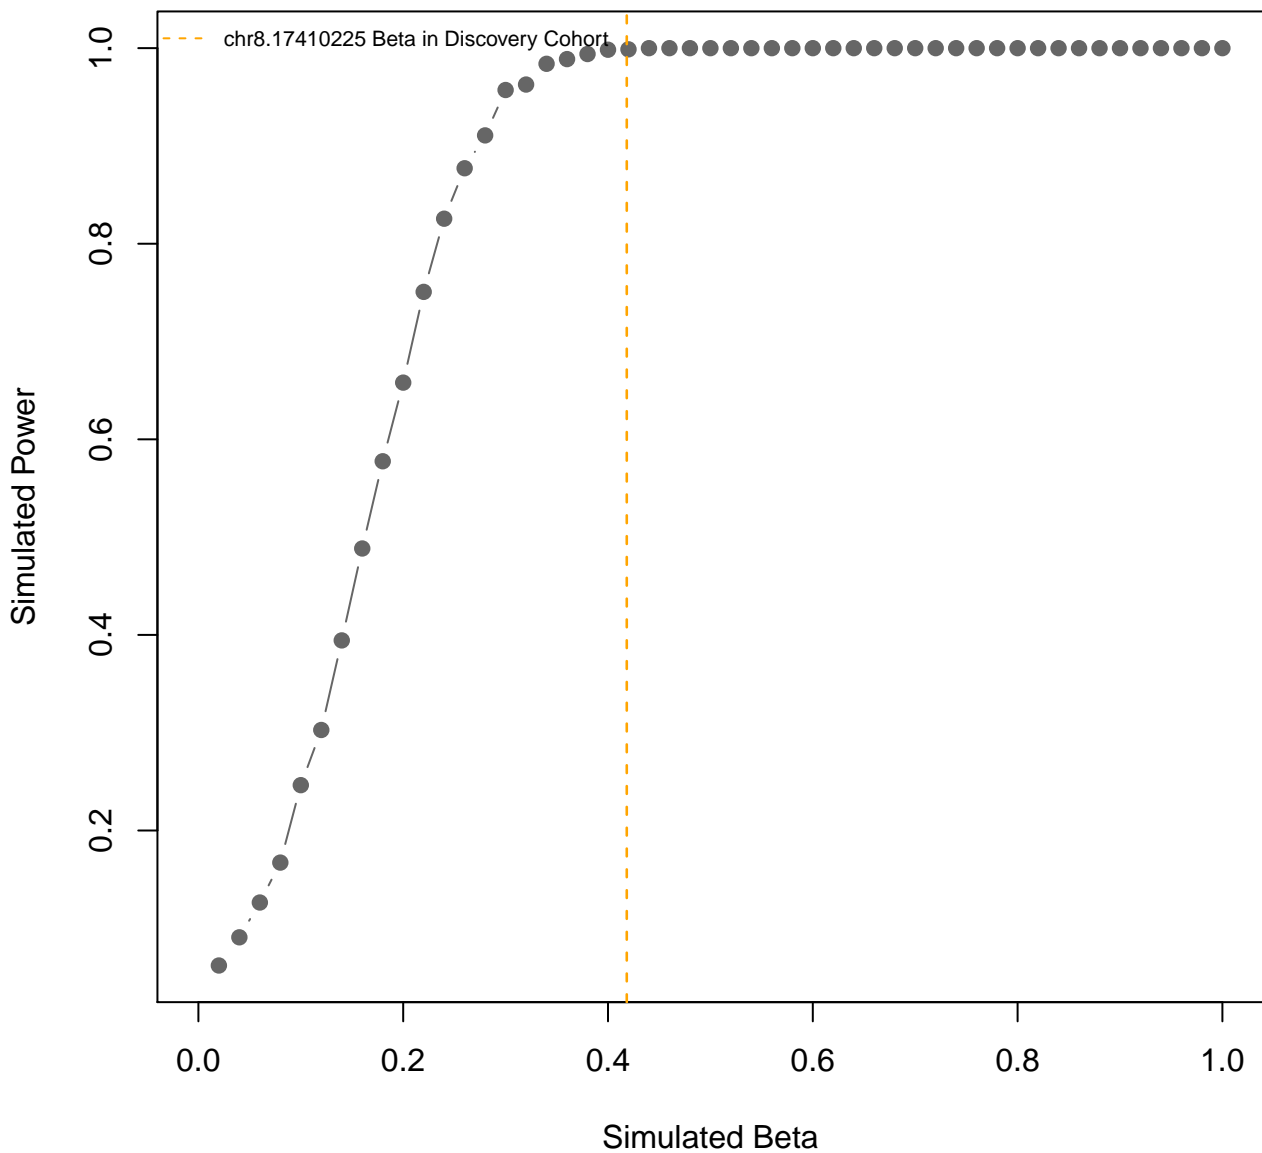

Supplement: Supplementary file 2 [file 2]
