# Supplementary material
Source: publisher figshare collection journal article supplement (https://gsajournals.figshare.com/articles/dataset/_/11674221)
Supplement: Supplementary file 1 [file 2]

# F34 Array, body weight day 1

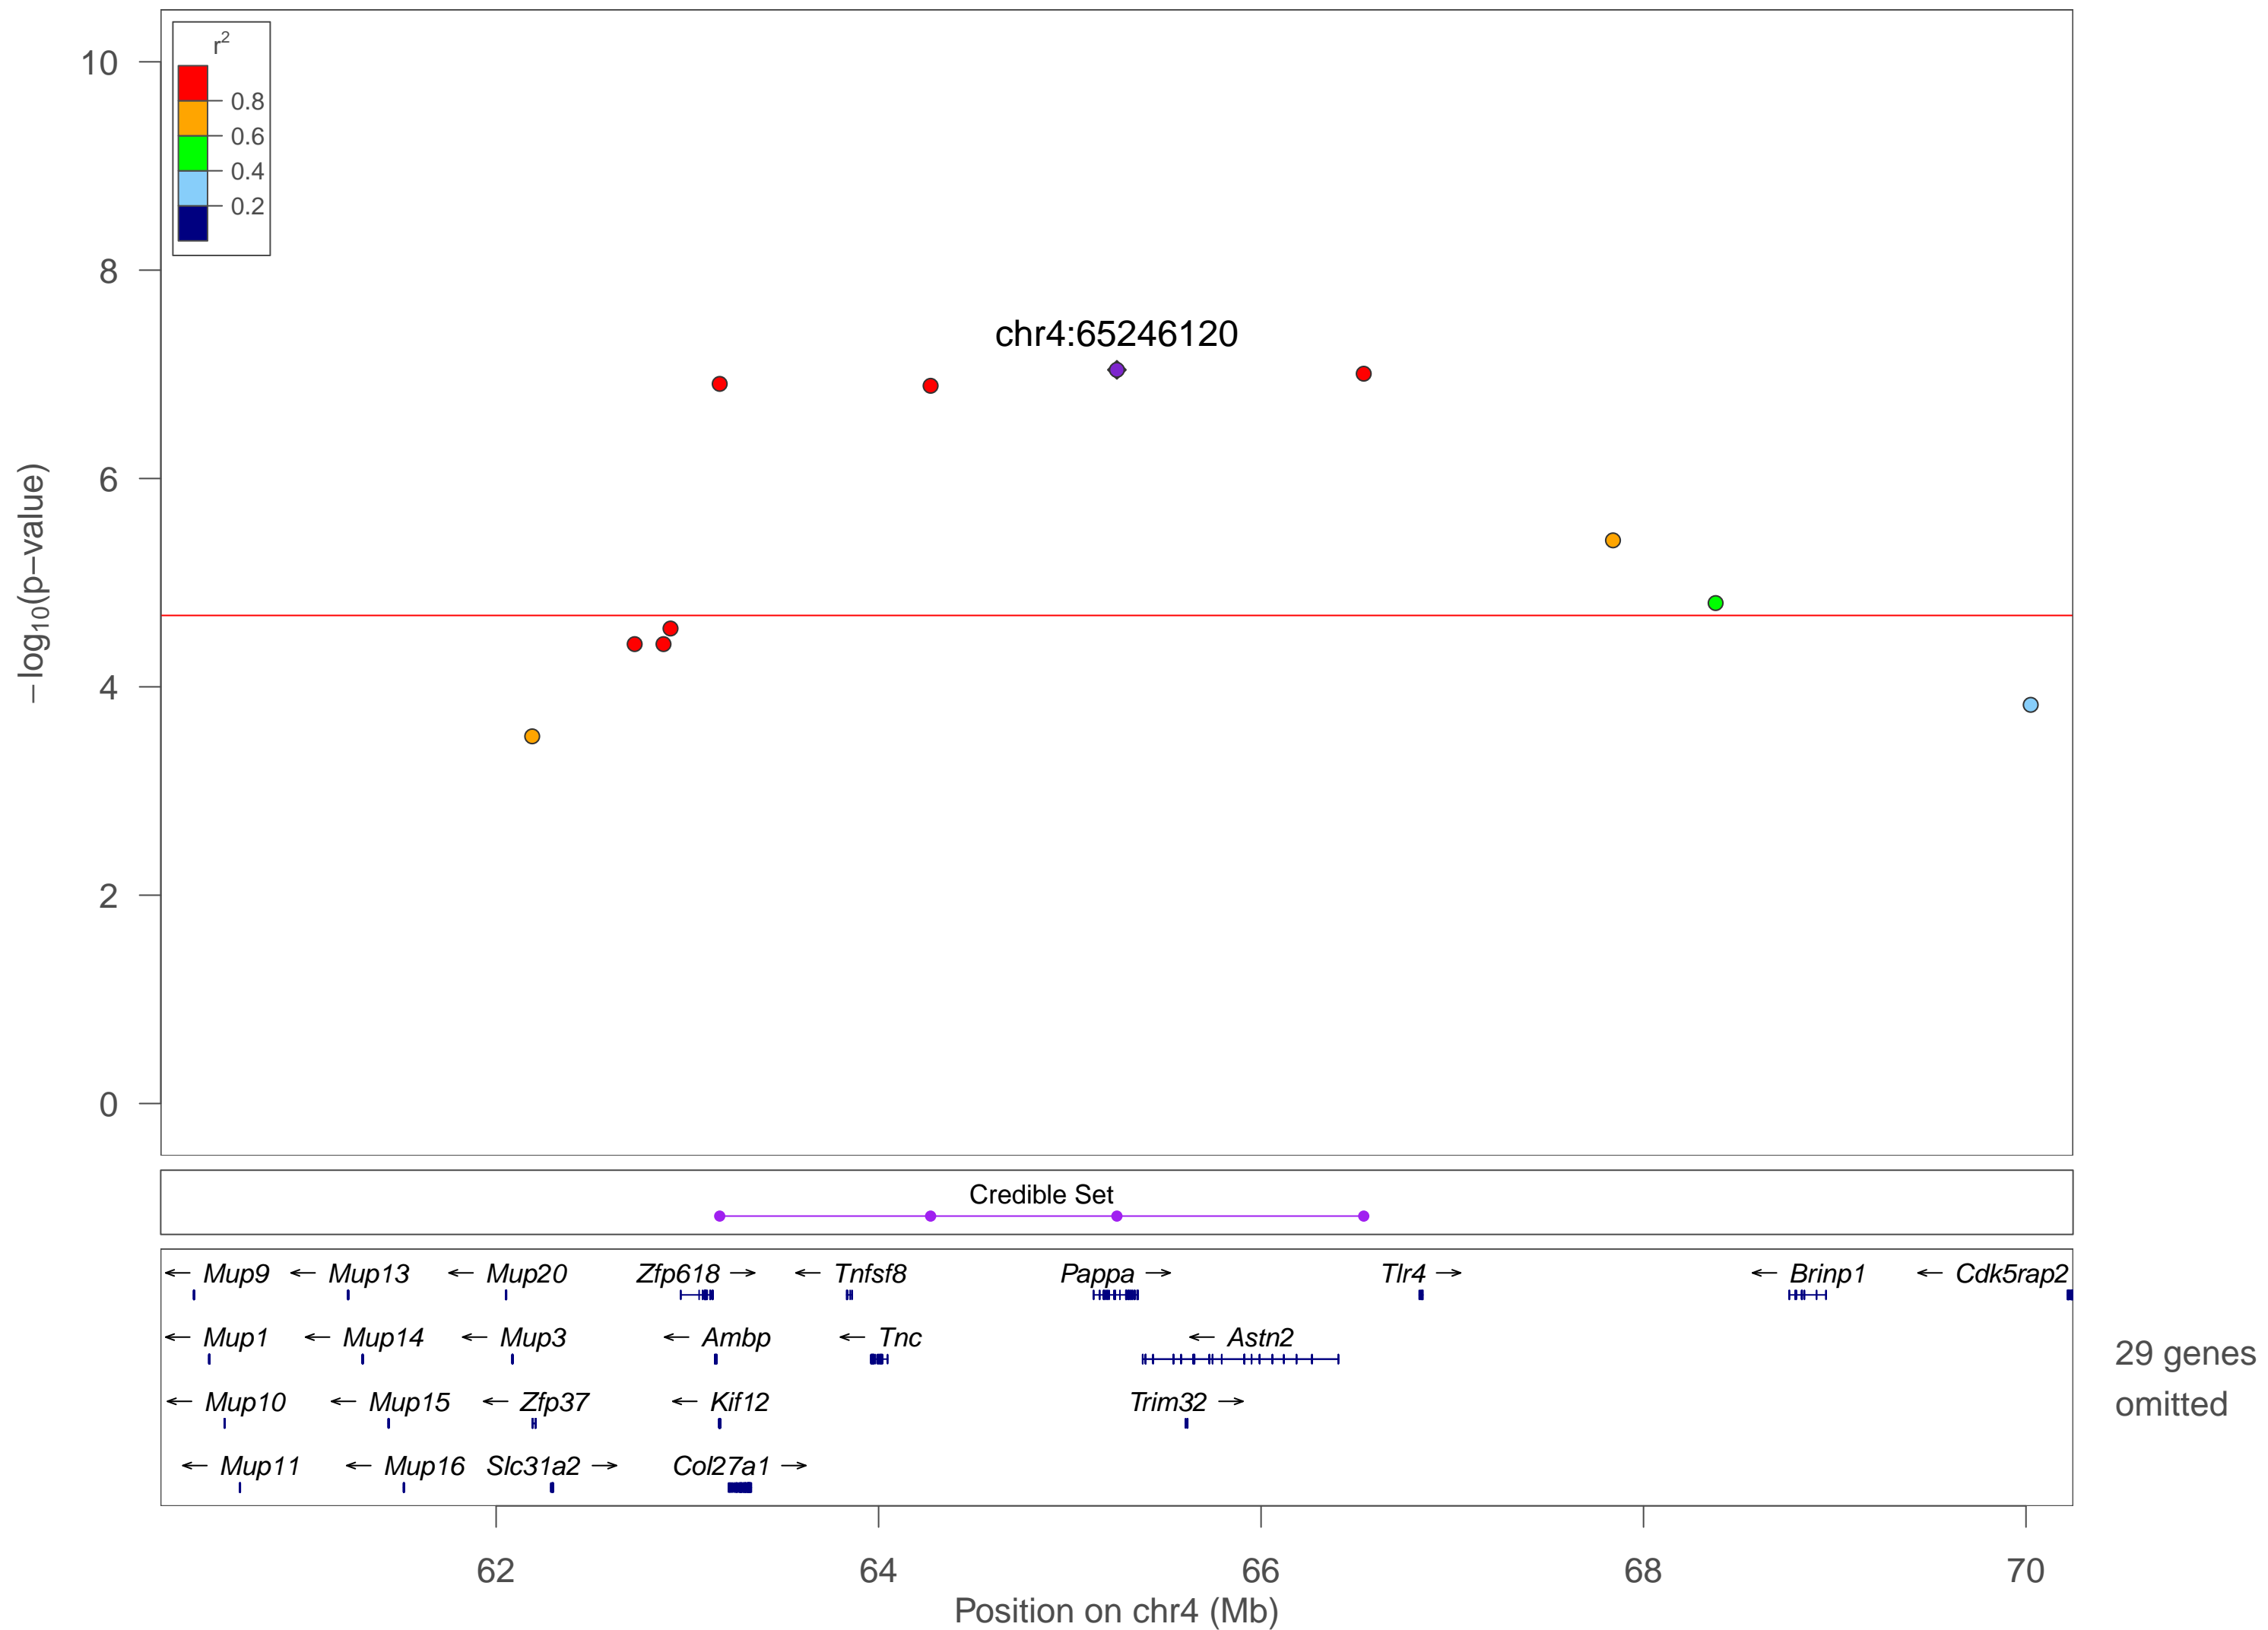

date: Thu Oct 25 16:44:34 2018  
build: F34Array  
display range: chr4:60246120–70246120 [60246120–70246120]  
hilite range: 0 – 0 [ 0 – 0 ]  
reference SNP: chr4:65246120  
number of SNPs plotted: 12  
min P-value: 9.06E–8 [chr4:65246120]  
max P-value: 2.99E–4 [chr4:62188670]  
omitted Genes: Mup12, Mup17, Mup18  
omitted Genes: Mup19, Mup5, Mup21  
omitted Genes: Fkbp15, Slc31a1, Cdc26  
omitted Genes: Prpf4, Rnf183, Wdr31  
omitted Genes: Bspy, Hdhd3, Alad  
omitted Genes: Pole3, 4933430I17Rik, Rgs3  
omitted Genes: Mir455, Orm1, Orm3  
omitted Genes: Orm2, Akna, Whrn  
omitted Genes: Atp6v1g1, 6330416G13Rik, Gm11213  
omitted Genes: 1700018C11Rik, Tnfsf15

Fine-mapping Regions

| snp           | chr | pos (Mb) | pp        | group        | color  |
|---------------|-----|----------|-----------|--------------|--------|
| chr4:63169190 | 4   | 63.16919 | 0.2189622 | Credible Set | purple |
| chr4:64272026 | 4   | 64.27203 | 0.2102491 | Credible Set | purple |
| chr4:65246120 | 4   | 65.24612 | 0.2955478 | Credible Set | purple |
| chr4:66536974 | 4   | 66.53697 | 0.2722694 | Credible Set | purple |

# F34 Array, body weight day 1

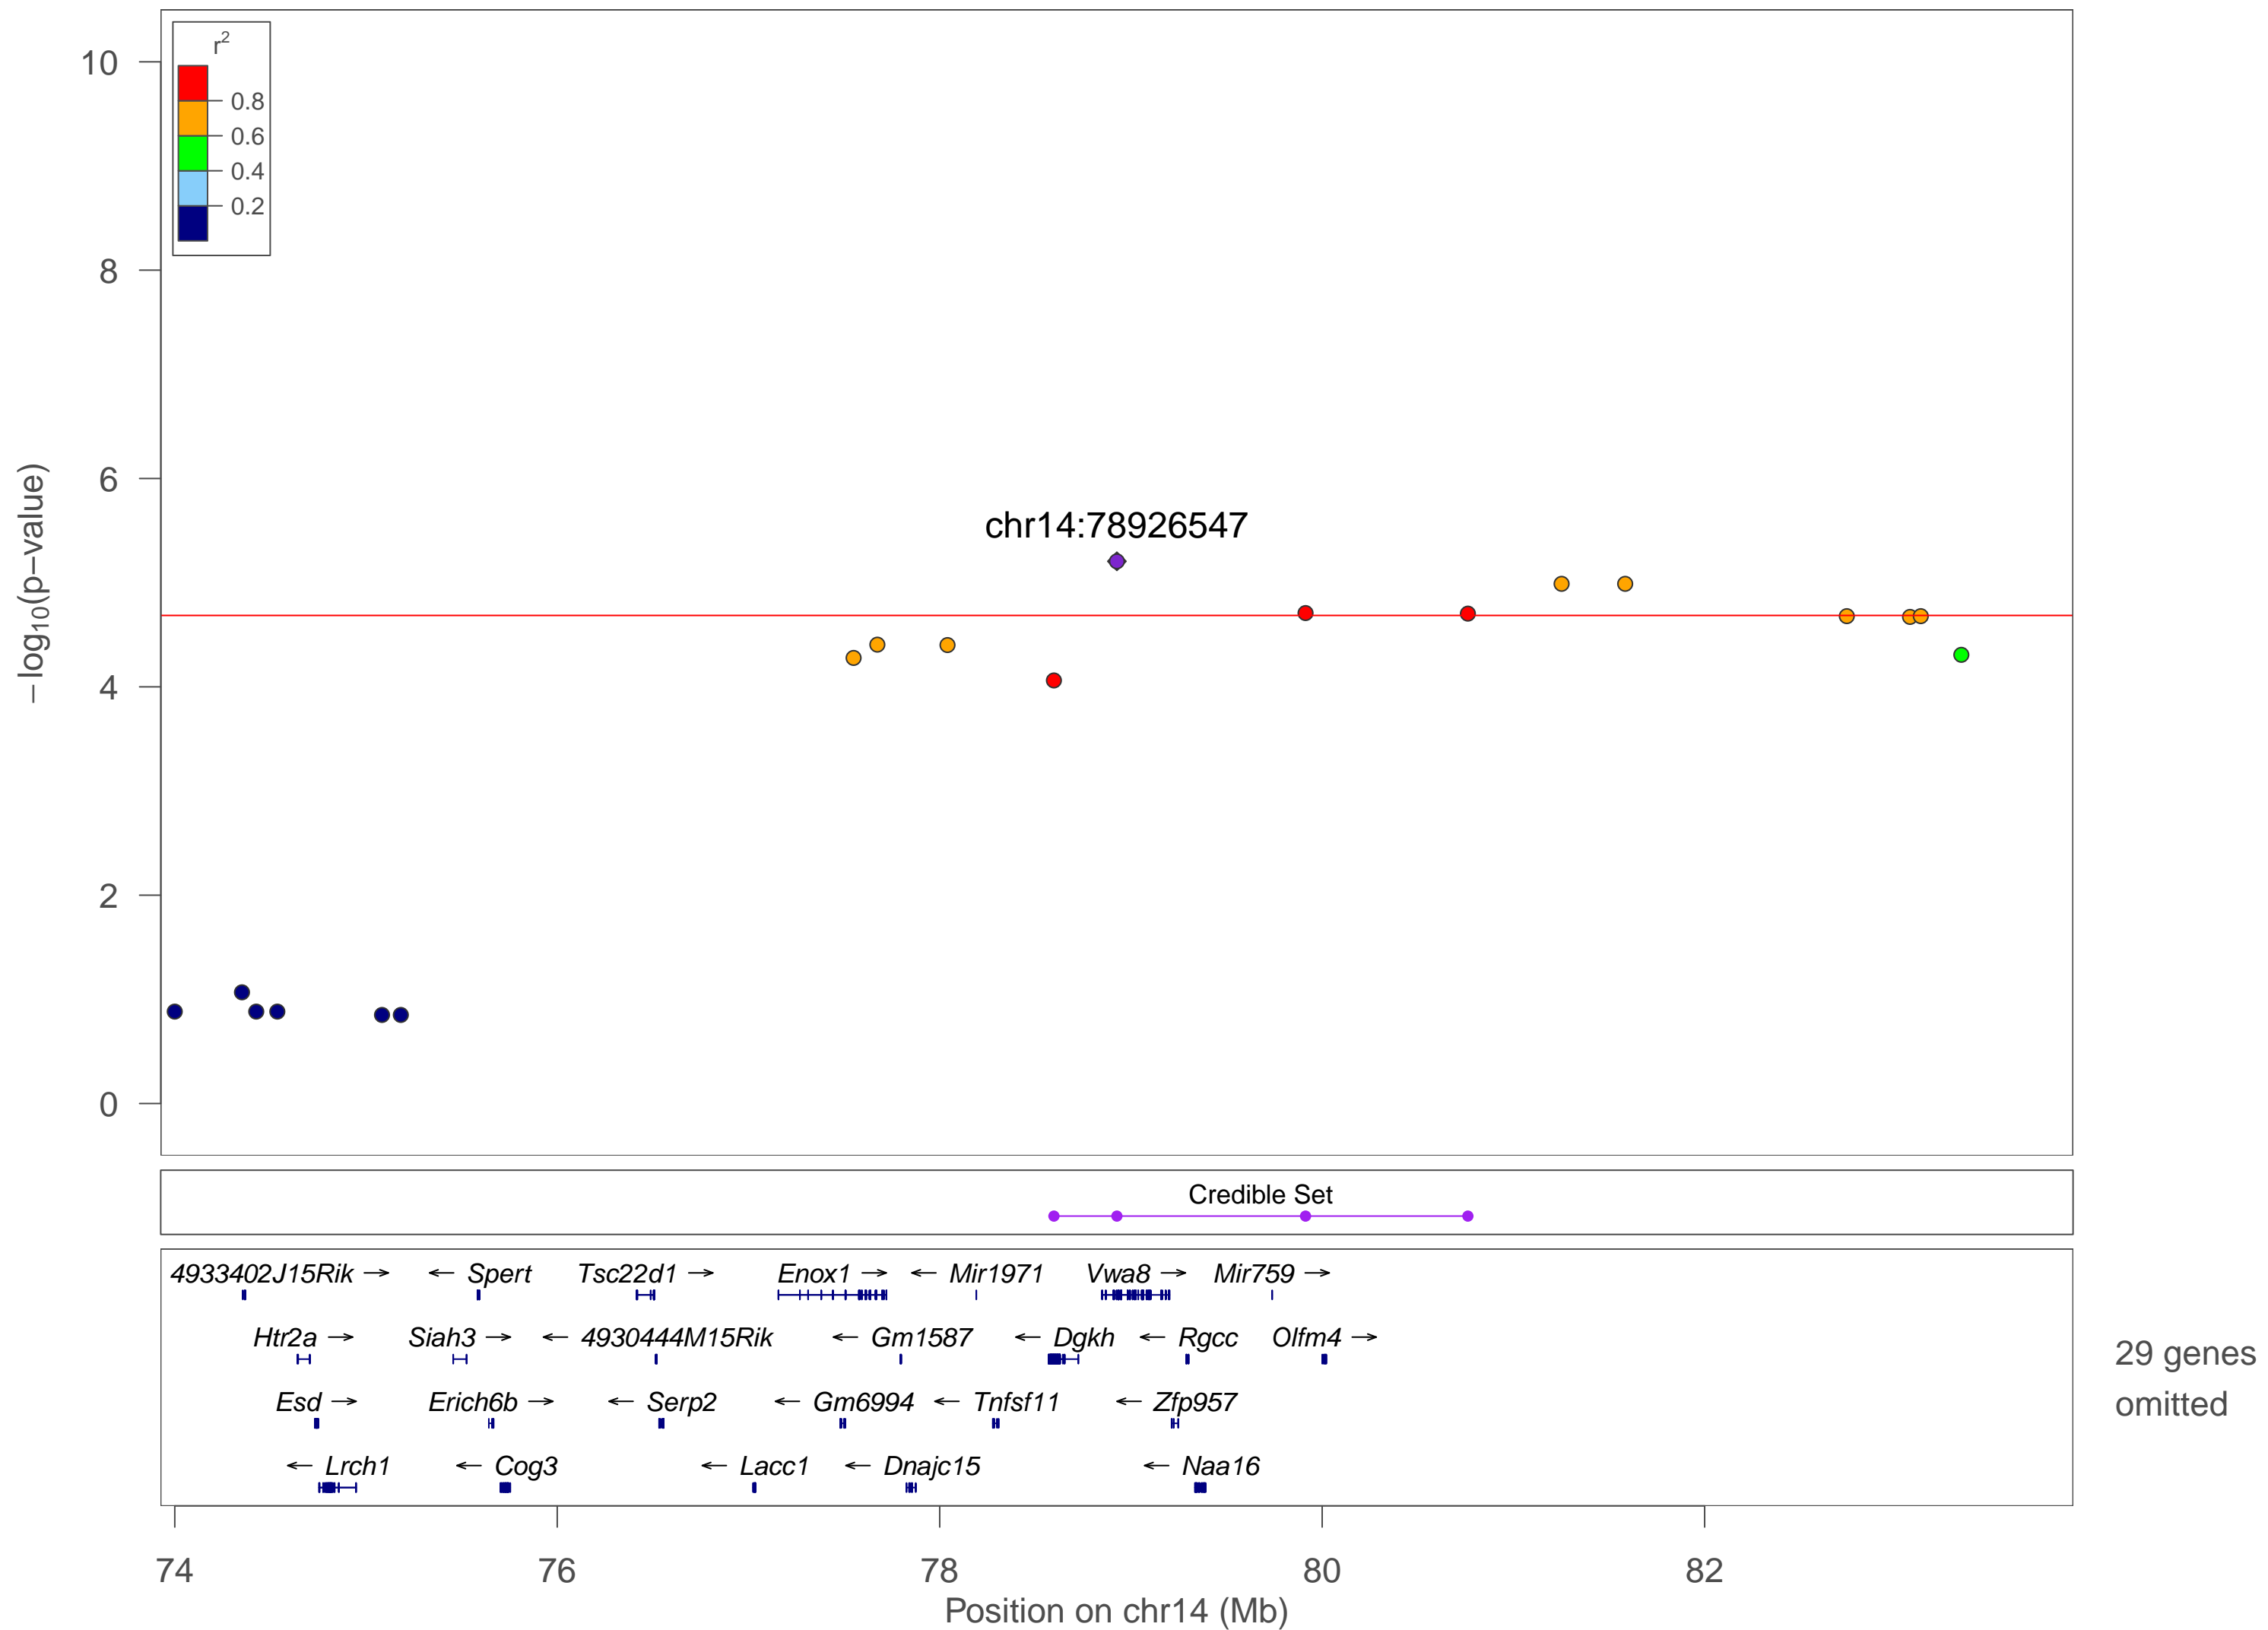

date: Thu Oct 25 16:44:27 2018  
build: F34Array  
display range: chr14:73926547–83926547 [73926547–83926547]  
hilite range: 0 – 0 [ 0 – 0 ]  
reference SNP: chr14:78926547  
number of SNPs plotted: 20  
min P-value: 6.24E–6 [chr14:78926547]  
max P-value: 1.41E–1 [chr14:75083773]  
omitted Genes: Gm4278, 5031414D18Rik, Lrrc63  
omitted Genes: Lcp1, Cpb2, Zc3h13  
omitted Genes: Slc25a30, Gm4285, Tpt1  
omitted Genes: Snora31, Gtf2f2, Kctd4  
omitted Genes: Gpalpp1, Nufip1, 1700108F19Rik  
omitted Genes: Ccdc122, Epsti1, Fam216b  
omitted Genes: Akap11, Mtrf1, Kbtbd7  
omitted Genes: Kbtbd6, Wbp4, Elf1  
omitted Genes: Sugt1, Lect1, 4930452G13Rik  
omitted Genes: Pcdh8, Gm10845

Fine-mapping Regions

| snp            | chr | pos (Mb) | pp         | group        | color  |
|----------------|-----|----------|------------|--------------|--------|
| chr14:78597230 | 14  | 78.59723 | 0.04671101 | Credible Set | purple |
| chr14:78926547 | 14  | 78.92655 | 0.57169961 | Credible Set | purple |
| chr14:79913027 | 14  | 79.91303 | 0.19194230 | Credible Set | purple |
| chr14:80762011 | 14  | 80.76201 | 0.18964708 | Credible Set | purple |

F34 Array, routine CBC white blood cell count

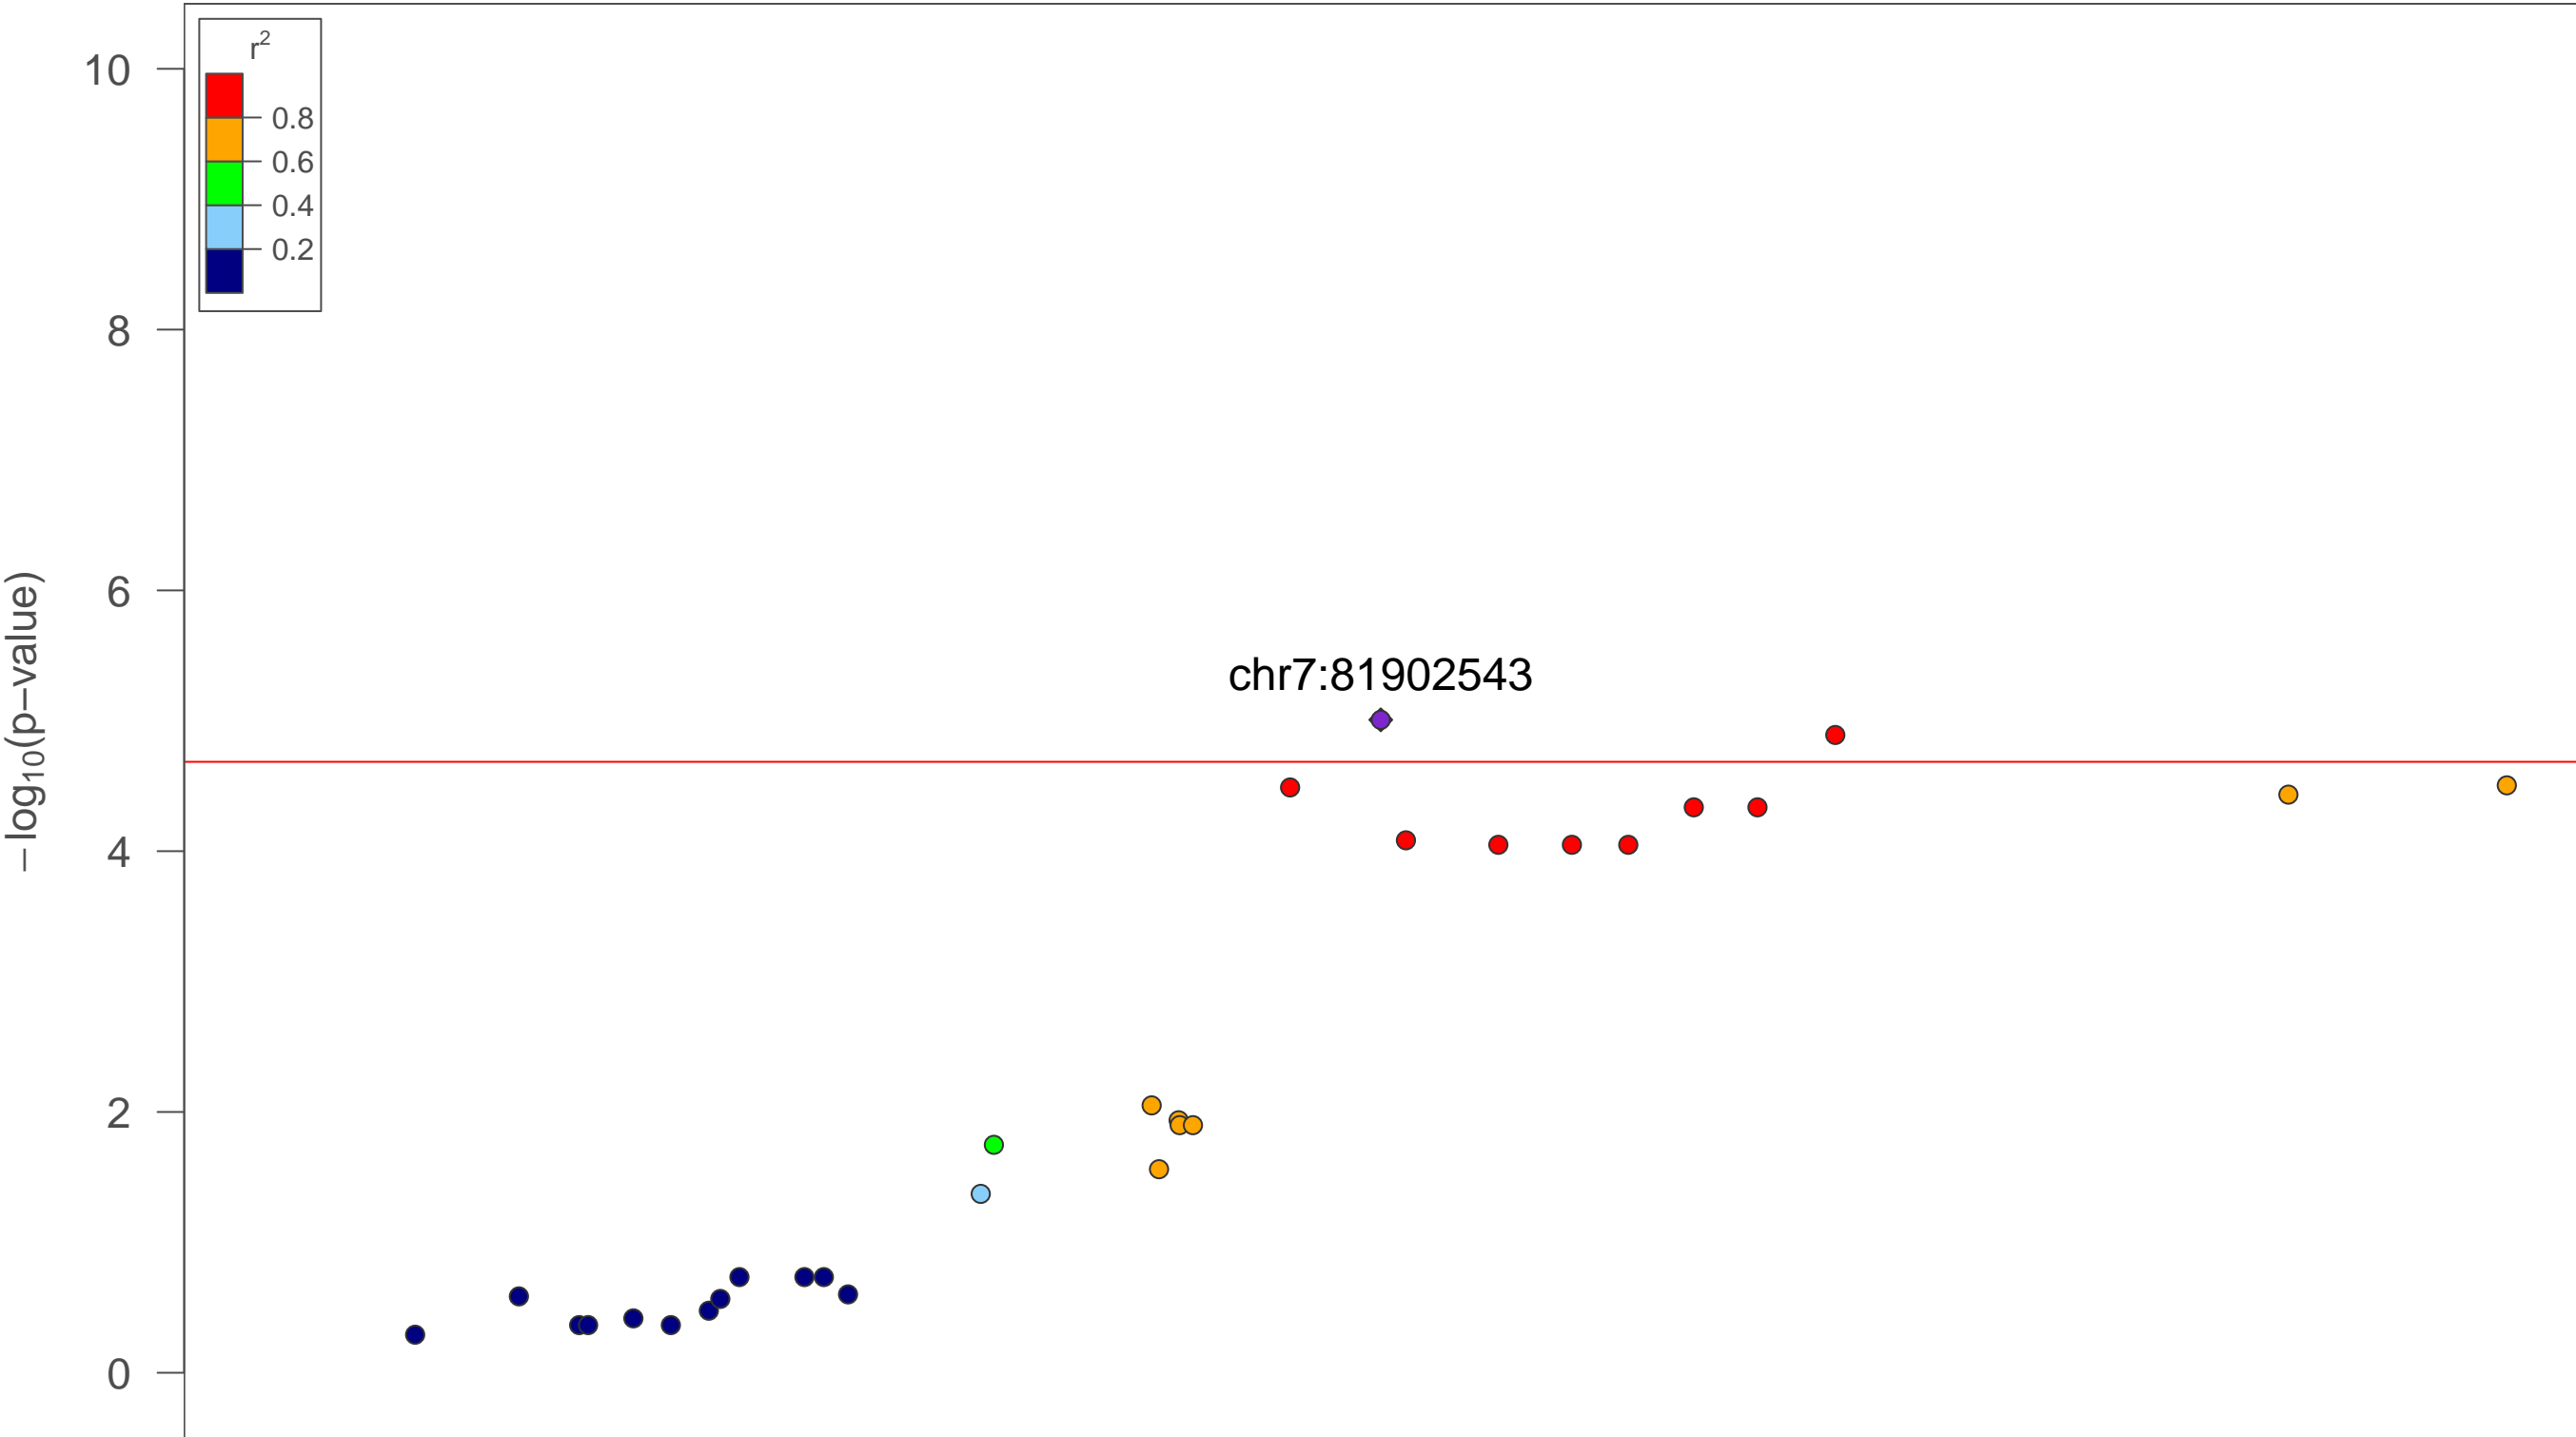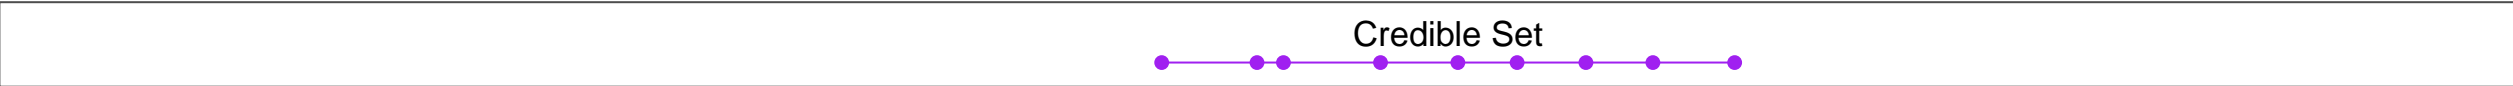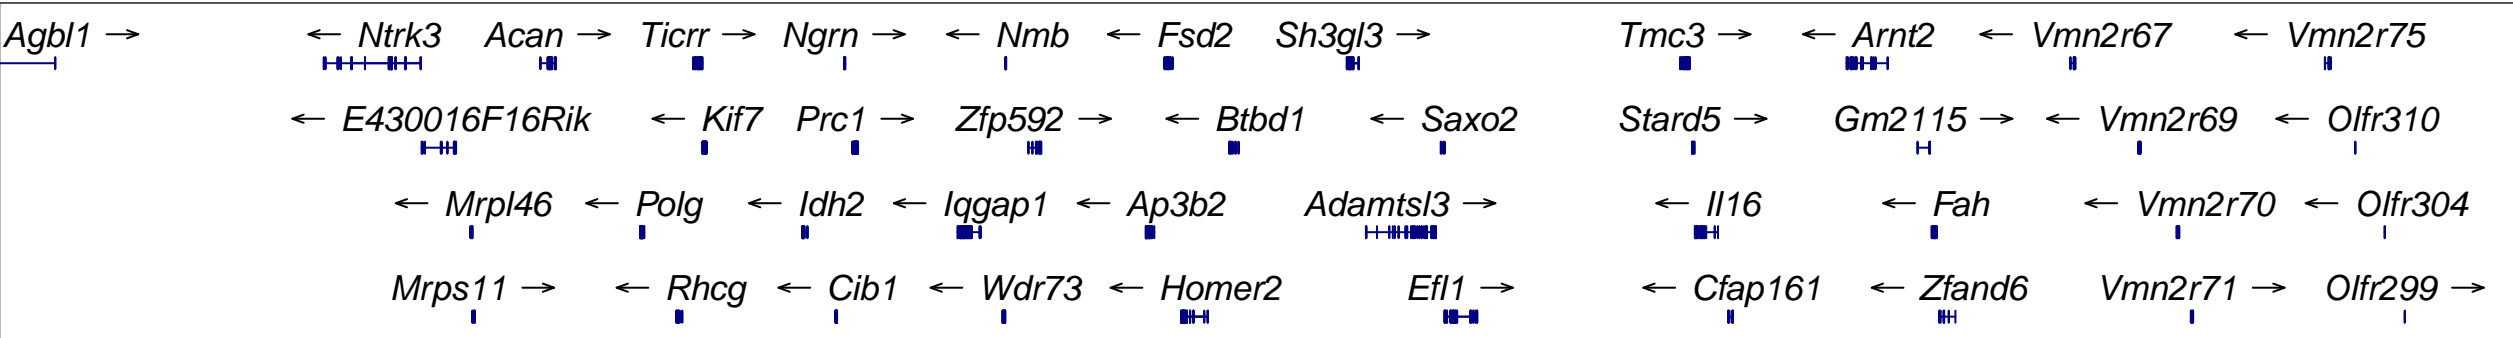

83 genes  
omitted

date: Thu Oct 25 16:44:49 2018  
build: F34Array  
display range: chr7:76902543–86902543 [76902543–86902543]  
hilite range: 0 – 0 [ 0 – 0 ]  
reference SNP: chr7:81902543  
number of SNPs plotted: 31  
min P-value: 9.83E–6 [chr7:81902543]  
max P-value: 5.11E–1 [chr7:77868097]  
omitted Genes: Det1, Mir7–2, Aen  
omitted Genes: Isg20, Gm26633, Hapln3  
omitted Genes: Mfge8, Abhd2, Rlbp1  
omitted Genes: Fanci, Mir9–3hg, Mir9–3  
omitted Genes: Plin1, Pex11a, Wdr93  
omitted Genes: Mesp1, Mesp2, Anpep  
omitted Genes: Ap3s2, Arpin, Zfp710  
omitted Genes: Gm21057, Sema4b, Gdpgp1  
omitted Genes: Ttll13, Vps33b, Rccd1  
omitted Genes: Unc45a, Hddc3, Man2a2  
omitted Genes: Fes, Furin, Blm  
omitted Genes: Crtc3, Gm15880, Zscan2  
omitted Genes: Sec11a, Alpk3, Slc28a1  
omitted Genes: Pde8a, Rps17, Cpeb1  
omitted Genes: BC048679, 2900076A07Rik, Mir1839  
omitted Genes: Whamm, Fam103a1, 3110040N11Rik  
omitted Genes: Tm6sf1, Hdgfrp3, Bnc1  
omitted Genes: Gm20744, 4933406J10Rik, Mex3b  
omitted Genes: 4933430H16Rik, Mesdc1, Mesdc2  
omitted Genes: Cemip, Abhd17c, 2610206C17Rik  
omitted Genes: Olfr291, Olfr290, Vmn2r65  
omitted Genes: Vmn2r66, Vmn2r68, Vmn2r72  
omitted Genes: Vmn2r73, Vmn2r74, Vmn2r76  
omitted Genes: Olfr309, Olfr308, Olfr307  
omitted Genes: Olfr305, Olfr303, Olfr301  
omitted Genes: Olfr298, Olfr297, Olfr295  
omitted Genes: Olfr294, Olfr293, Olfr292  
omitted Genes: Folh1, Vmn2r77



Fine-mapping Regions

| snp           | chr | pos (Mb) | pp         | group        | color  |
|---------------|-----|----------|------------|--------------|--------|
| chr7:81523675 | 7   | 81.52367 | 0.10491650 | Credible Set | purple |
| chr7:81902543 | 7   | 81.90254 | 0.32716949 | Credible Set | purple |
| chr7:82007699 | 7   | 82.00770 | 0.04331532 | Credible Set | purple |
| chr7:82393693 | 7   | 82.39369 | 0.04018994 | Credible Set | purple |
| chr7:82701107 | 7   | 82.70111 | 0.04018994 | Credible Set | purple |
| chr7:82936666 | 7   | 82.93667 | 0.04018994 | Credible Set | purple |
| chr7:83210268 | 7   | 83.21027 | 0.07521401 | Credible Set | purple |
| chr7:83476529 | 7   | 83.47653 | 0.07521401 | Credible Set | purple |
| chr7:83801589 | 7   | 83.80159 | 0.25360084 | Credible Set | purple |

F34 Array, routine CBC white blood cell count

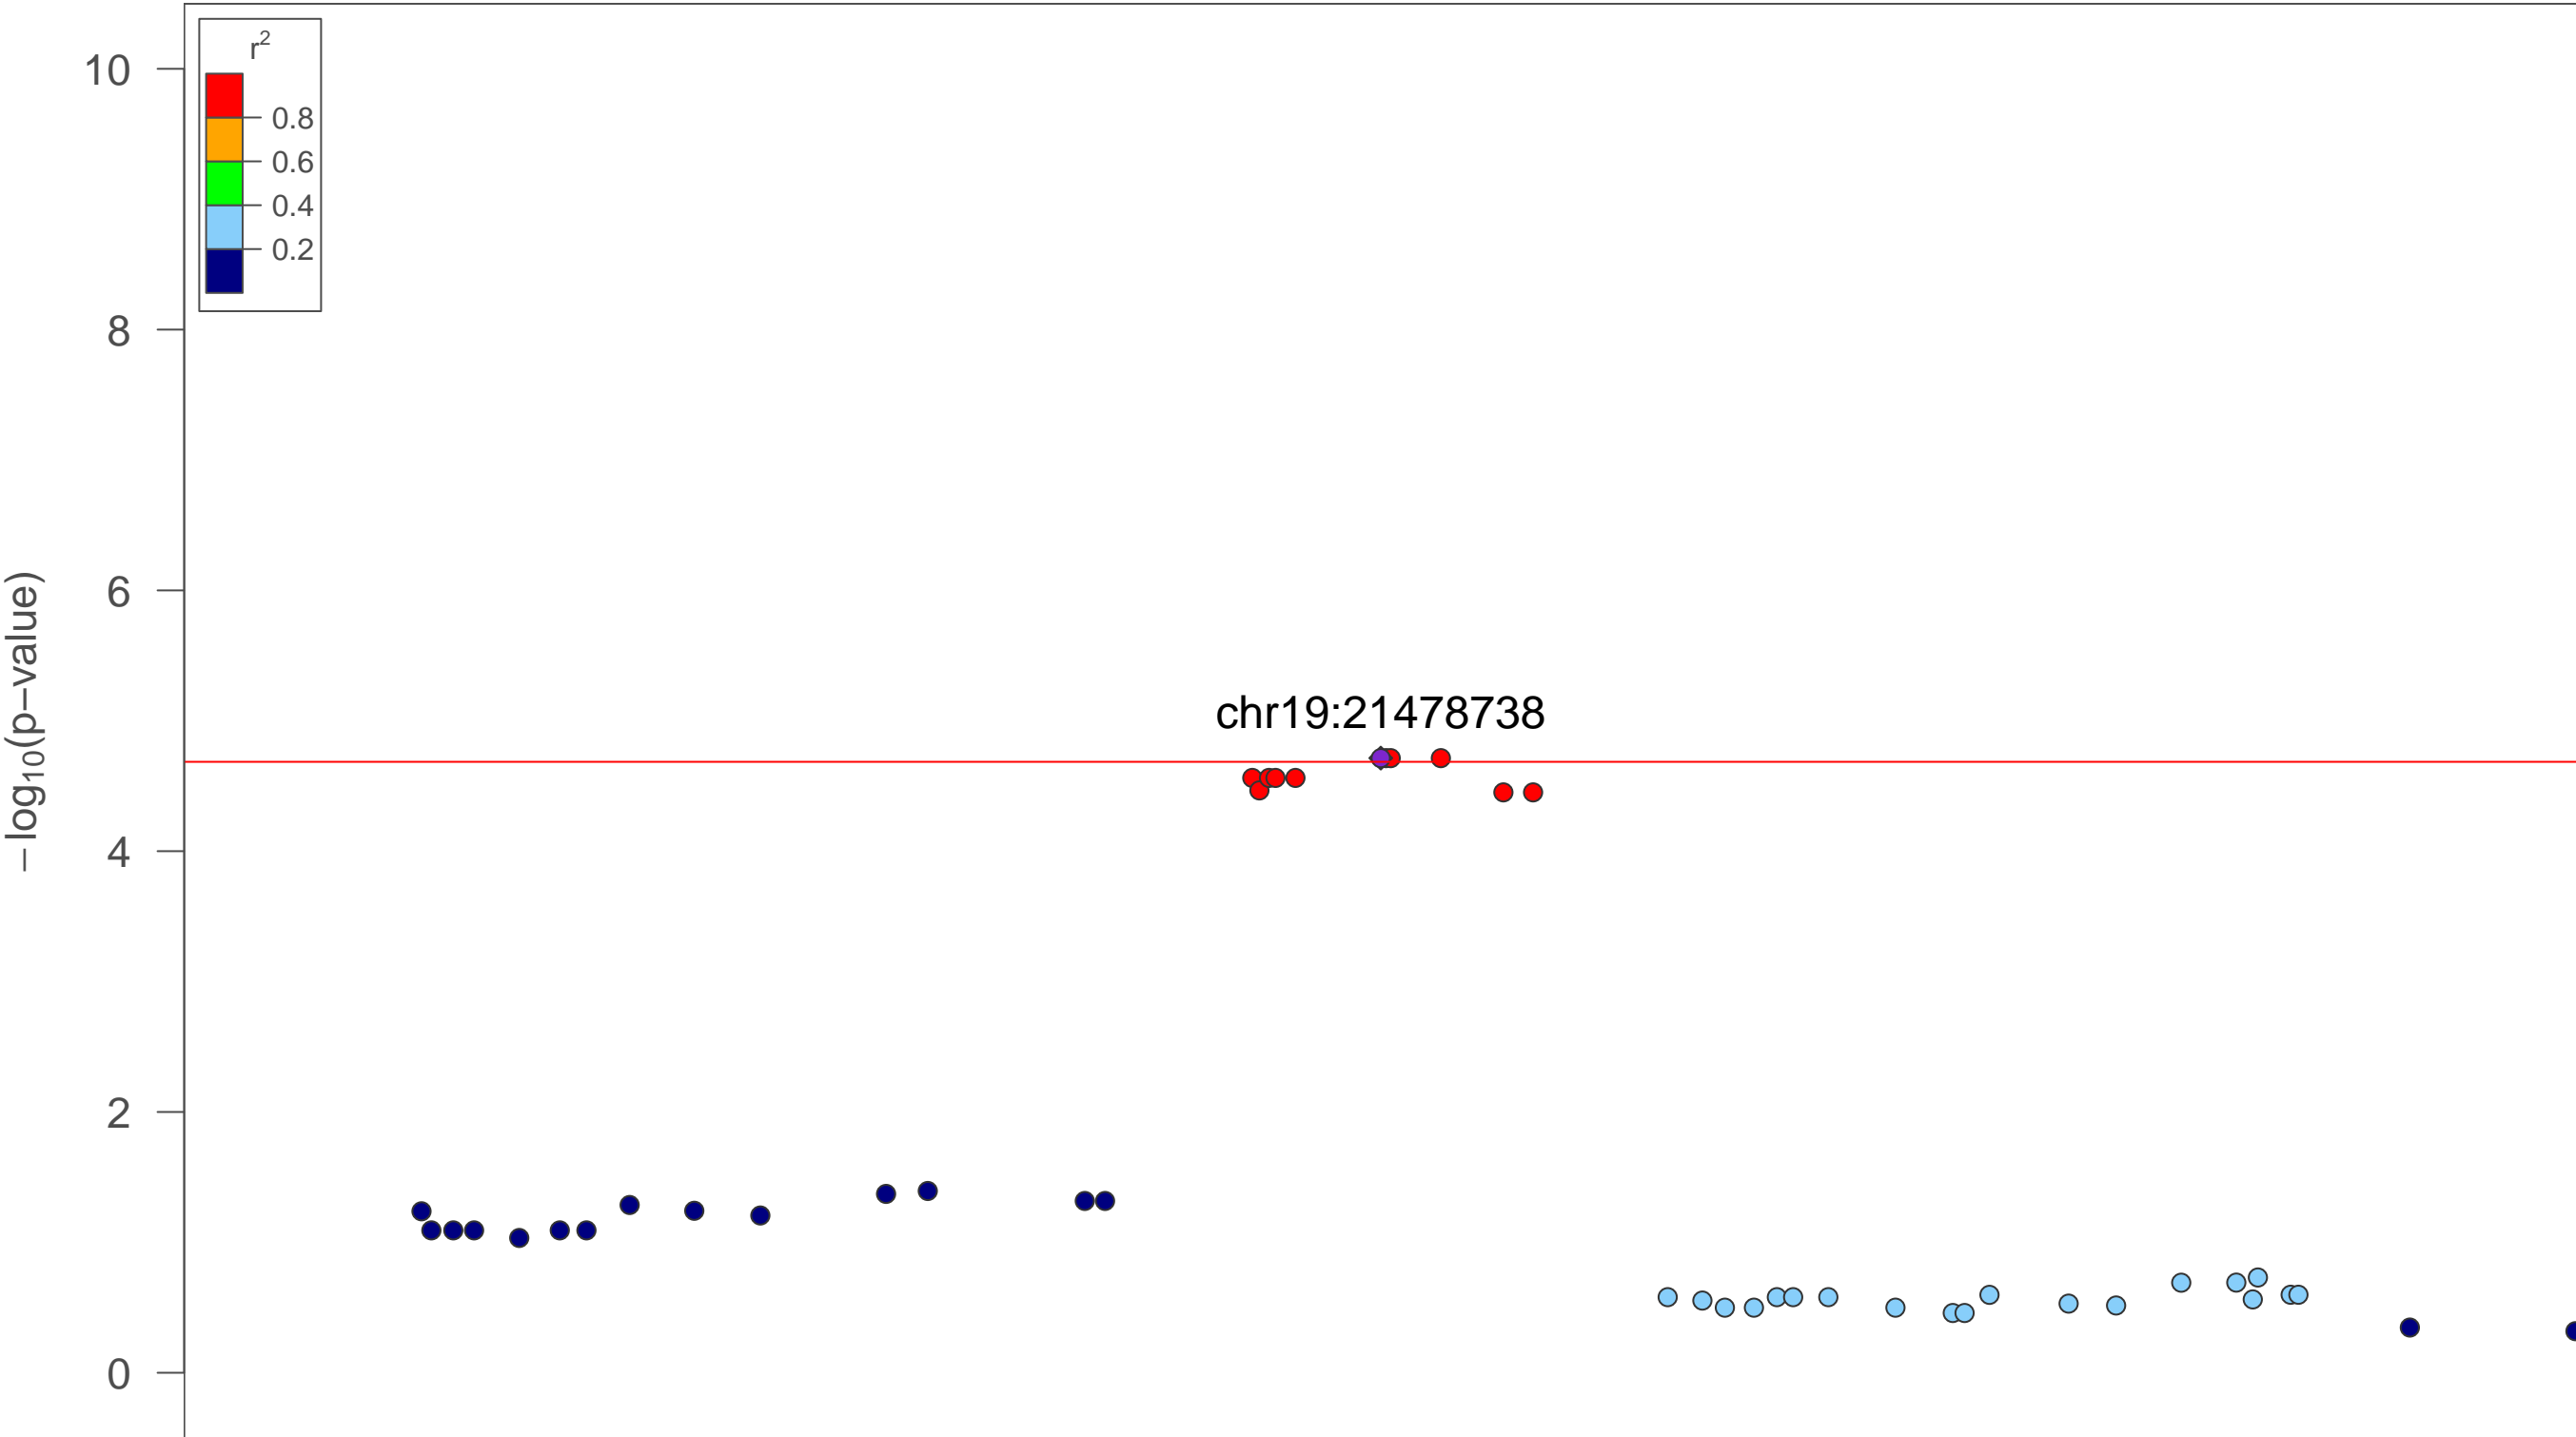

Credible Set

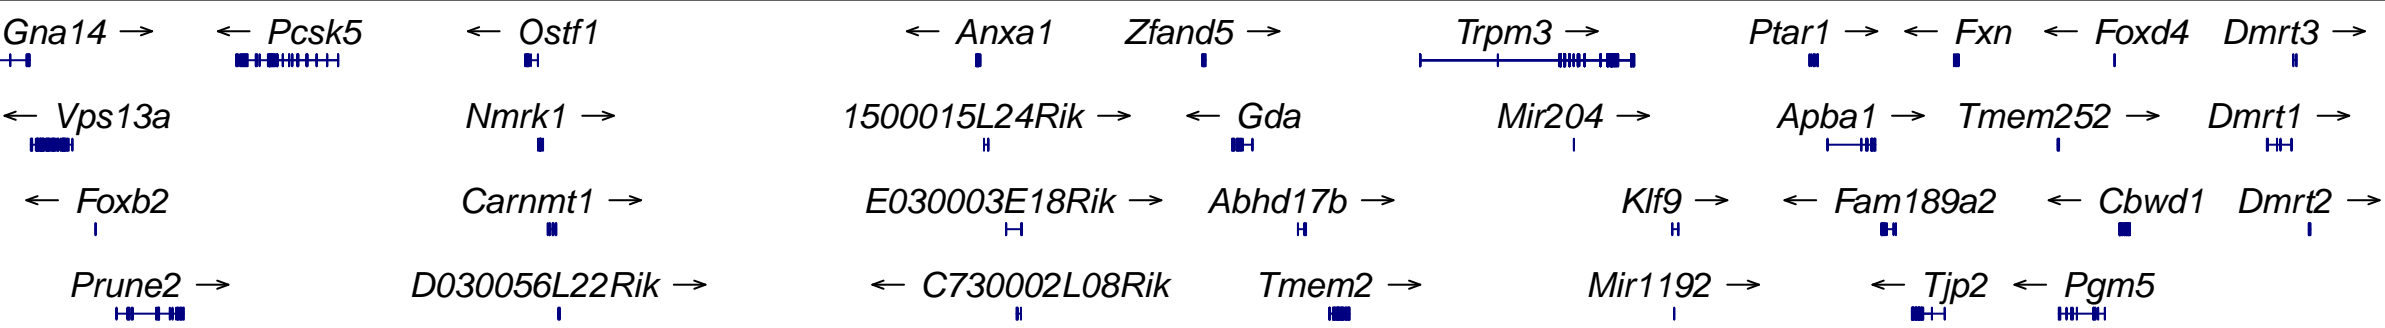

18 genes  
omitted

18

20

22

24

26

Position on chr19 (Mb)

date: Thu Oct 25 16:44:41 2018

build: F34Array

display range: chr19:16478738–26478738 [16478738–26478738]

hilite range: 0 – 0 [ 0 – 0 ]

reference SNP: chr19:21478738

number of SNPs plotted: 47

min P-value: 1.93E–5 [chr19:21478738]

max P-value: 4.8E–1 [chr19:26470094]

omitted Genes: Gcnt1, Rfk, Trpm6

omitted Genes: Rorb, Aldh1a1, Aldh1a7

omitted Genes: Tmc1, 4930554I06Rik, 1110059E24Rik

omitted Genes: Smc5, Mamdc2, 1700028P14Rik

omitted Genes: Pip5k1b, Fam122a, Mir3084–1

omitted Genes: Dock8, Kank1, 2610016A17Rik

Fine-mapping Regions

| snp            | chr | pos (Mb) | pp         | group        | color  |
|----------------|-----|----------|------------|--------------|--------|
| chr19:20941927 | 19  | 20.94193 | 0.08362408 | Credible Set | purple |
| chr19:20971640 | 19  | 20.97164 | 0.06780032 | Credible Set | purple |
| chr19:21011731 | 19  | 21.01173 | 0.08362408 | Credible Set | purple |
| chr19:21038918 | 19  | 21.03892 | 0.08362408 | Credible Set | purple |
| chr19:21122136 | 19  | 21.12214 | 0.08362408 | Credible Set | purple |
| chr19:21478738 | 19  | 21.47874 | 0.11662427 | Credible Set | purple |
| chr19:21500356 | 19  | 21.50036 | 0.11662427 | Credible Set | purple |
| chr19:21520189 | 19  | 21.52019 | 0.11662427 | Credible Set | purple |
| chr19:21729752 | 19  | 21.72975 | 0.11662427 | Credible Set | purple |
| chr19:21991002 | 19  | 21.99100 | 0.06560313 | Credible Set | purple |
| chr19:22115053 | 19  | 22.11505 | 0.06560313 | Credible Set | purple |

# F34 Array, routine CBC red blood cell count

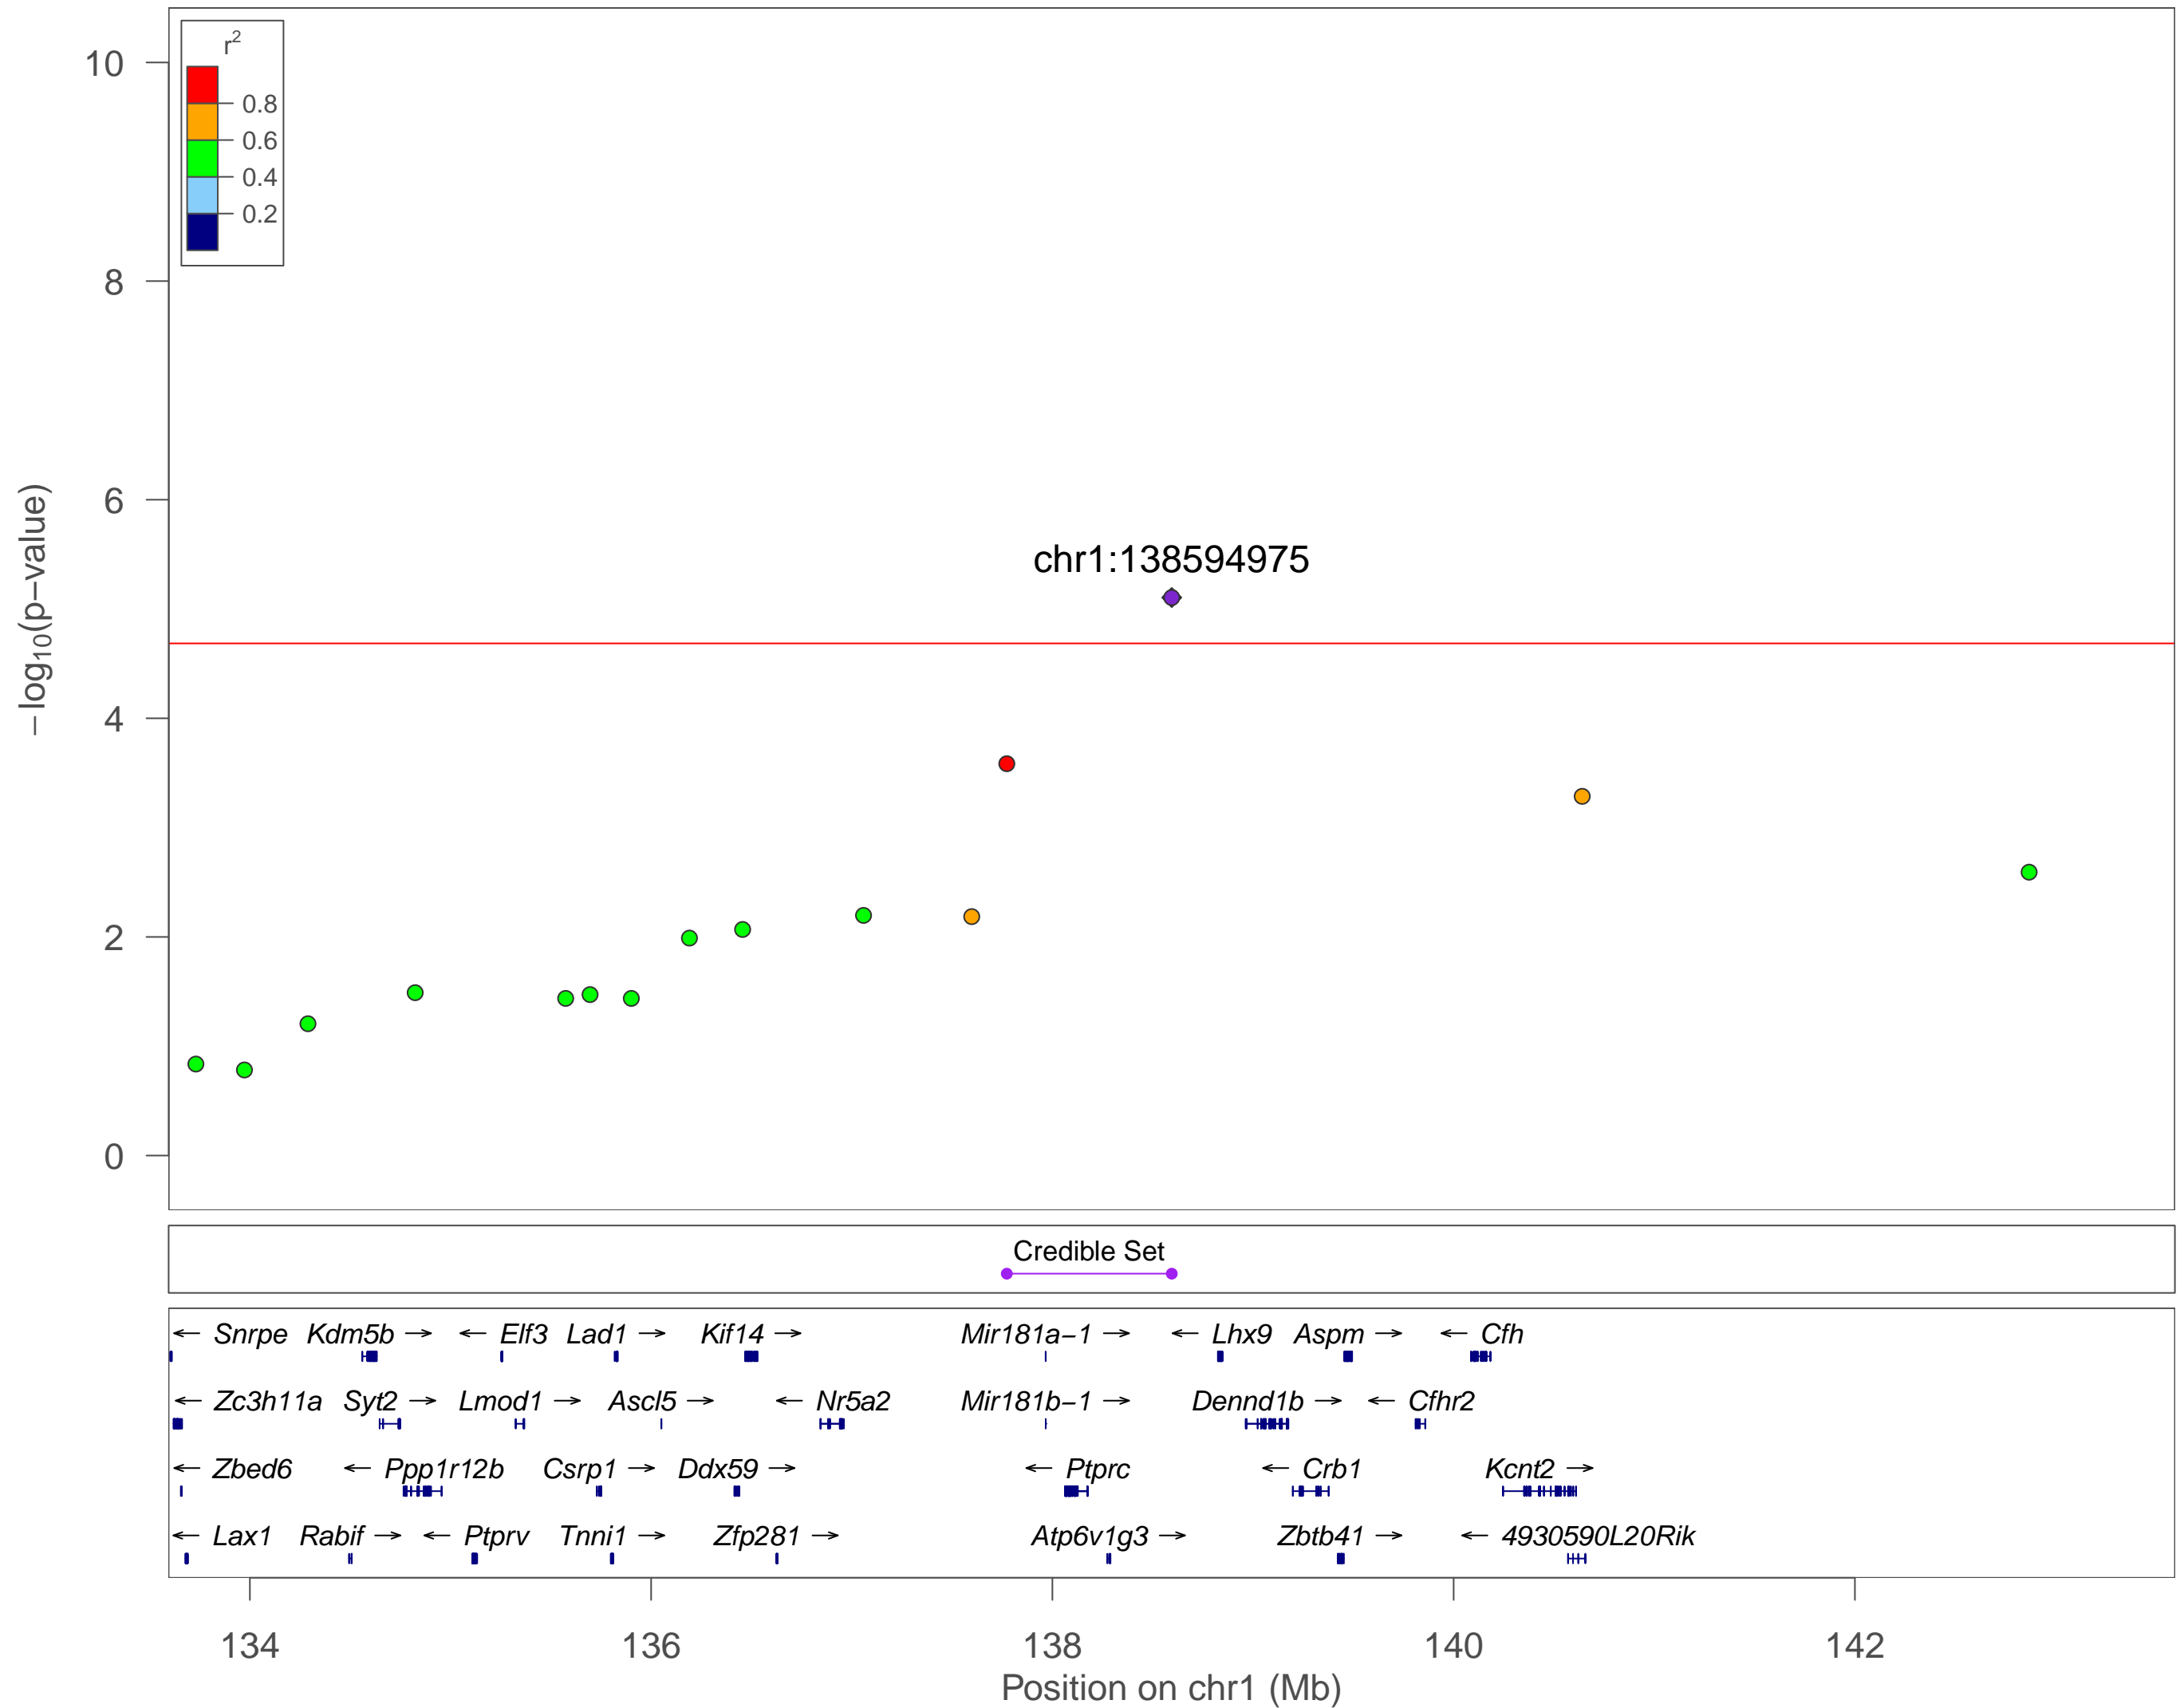

date: Thu Oct 25 16:46:11 2018  
build: F34Array  
display range: chr1:133594975–143594975 [133594975–143594975]  
hilite range: 0 – 0 [ 0 – 0 ]  
reference SNP: chr1:138594975  
number of SNPs plotted: 16  
min P-value: 7.85E–6 [chr1:138594975]  
max P-value: 1.65E–1 [chr1:133972959]  
omitted Genes: Atp2b4, Mir6903, Optc  
omitted Genes: Prelp, Fmod, Btg2  
omitted Genes: Chit1, Chil1, Mybph  
omitted Genes: Adora1, Myog, Ppfia4  
omitted Genes: Tmem183a, 4933406M09Rik, Cyb5r1  
omitted Genes: Adipor1, Klhl12, Mgat4e  
omitted Genes: Ube2t, Lgr6, Ptpn7  
omitted Genes: Arl8a, Gpr3711, Rnpep  
omitted Genes: Timm17a, Shisa4, Ipo9  
omitted Genes: Nav1, Mir1231, Phlda3  
omitted Genes: Tnnt2, Pkp1, Igfn1  
omitted Genes: Tmem9, Cacna1s, Gm15850  
omitted Genes: Kif21b, 5730559C18Rik, Gpr25  
omitted Genes: Camsap2, 9230116N13Rik, Gm19705  
omitted Genes: Platr22, Nek7, Gm5833  
omitted Genes: 2310009B15Rik, 4930596I21Rik, 4933436E23Rik  
omitted Genes: F13b, Cfhr1, Gm4788

Fine-mapping Regions

| snp            | chr | pos (Mb) | pp         | group        | color  |
|----------------|-----|----------|------------|--------------|--------|
| chr1:137772769 | 1   | 137.7728 | 0.03498787 | Credible Set | purple |
| chr1:138594975 | 1   | 138.5950 | 0.96501213 | Credible Set | purple |

# F34 Array, routine CBC hemoglobin

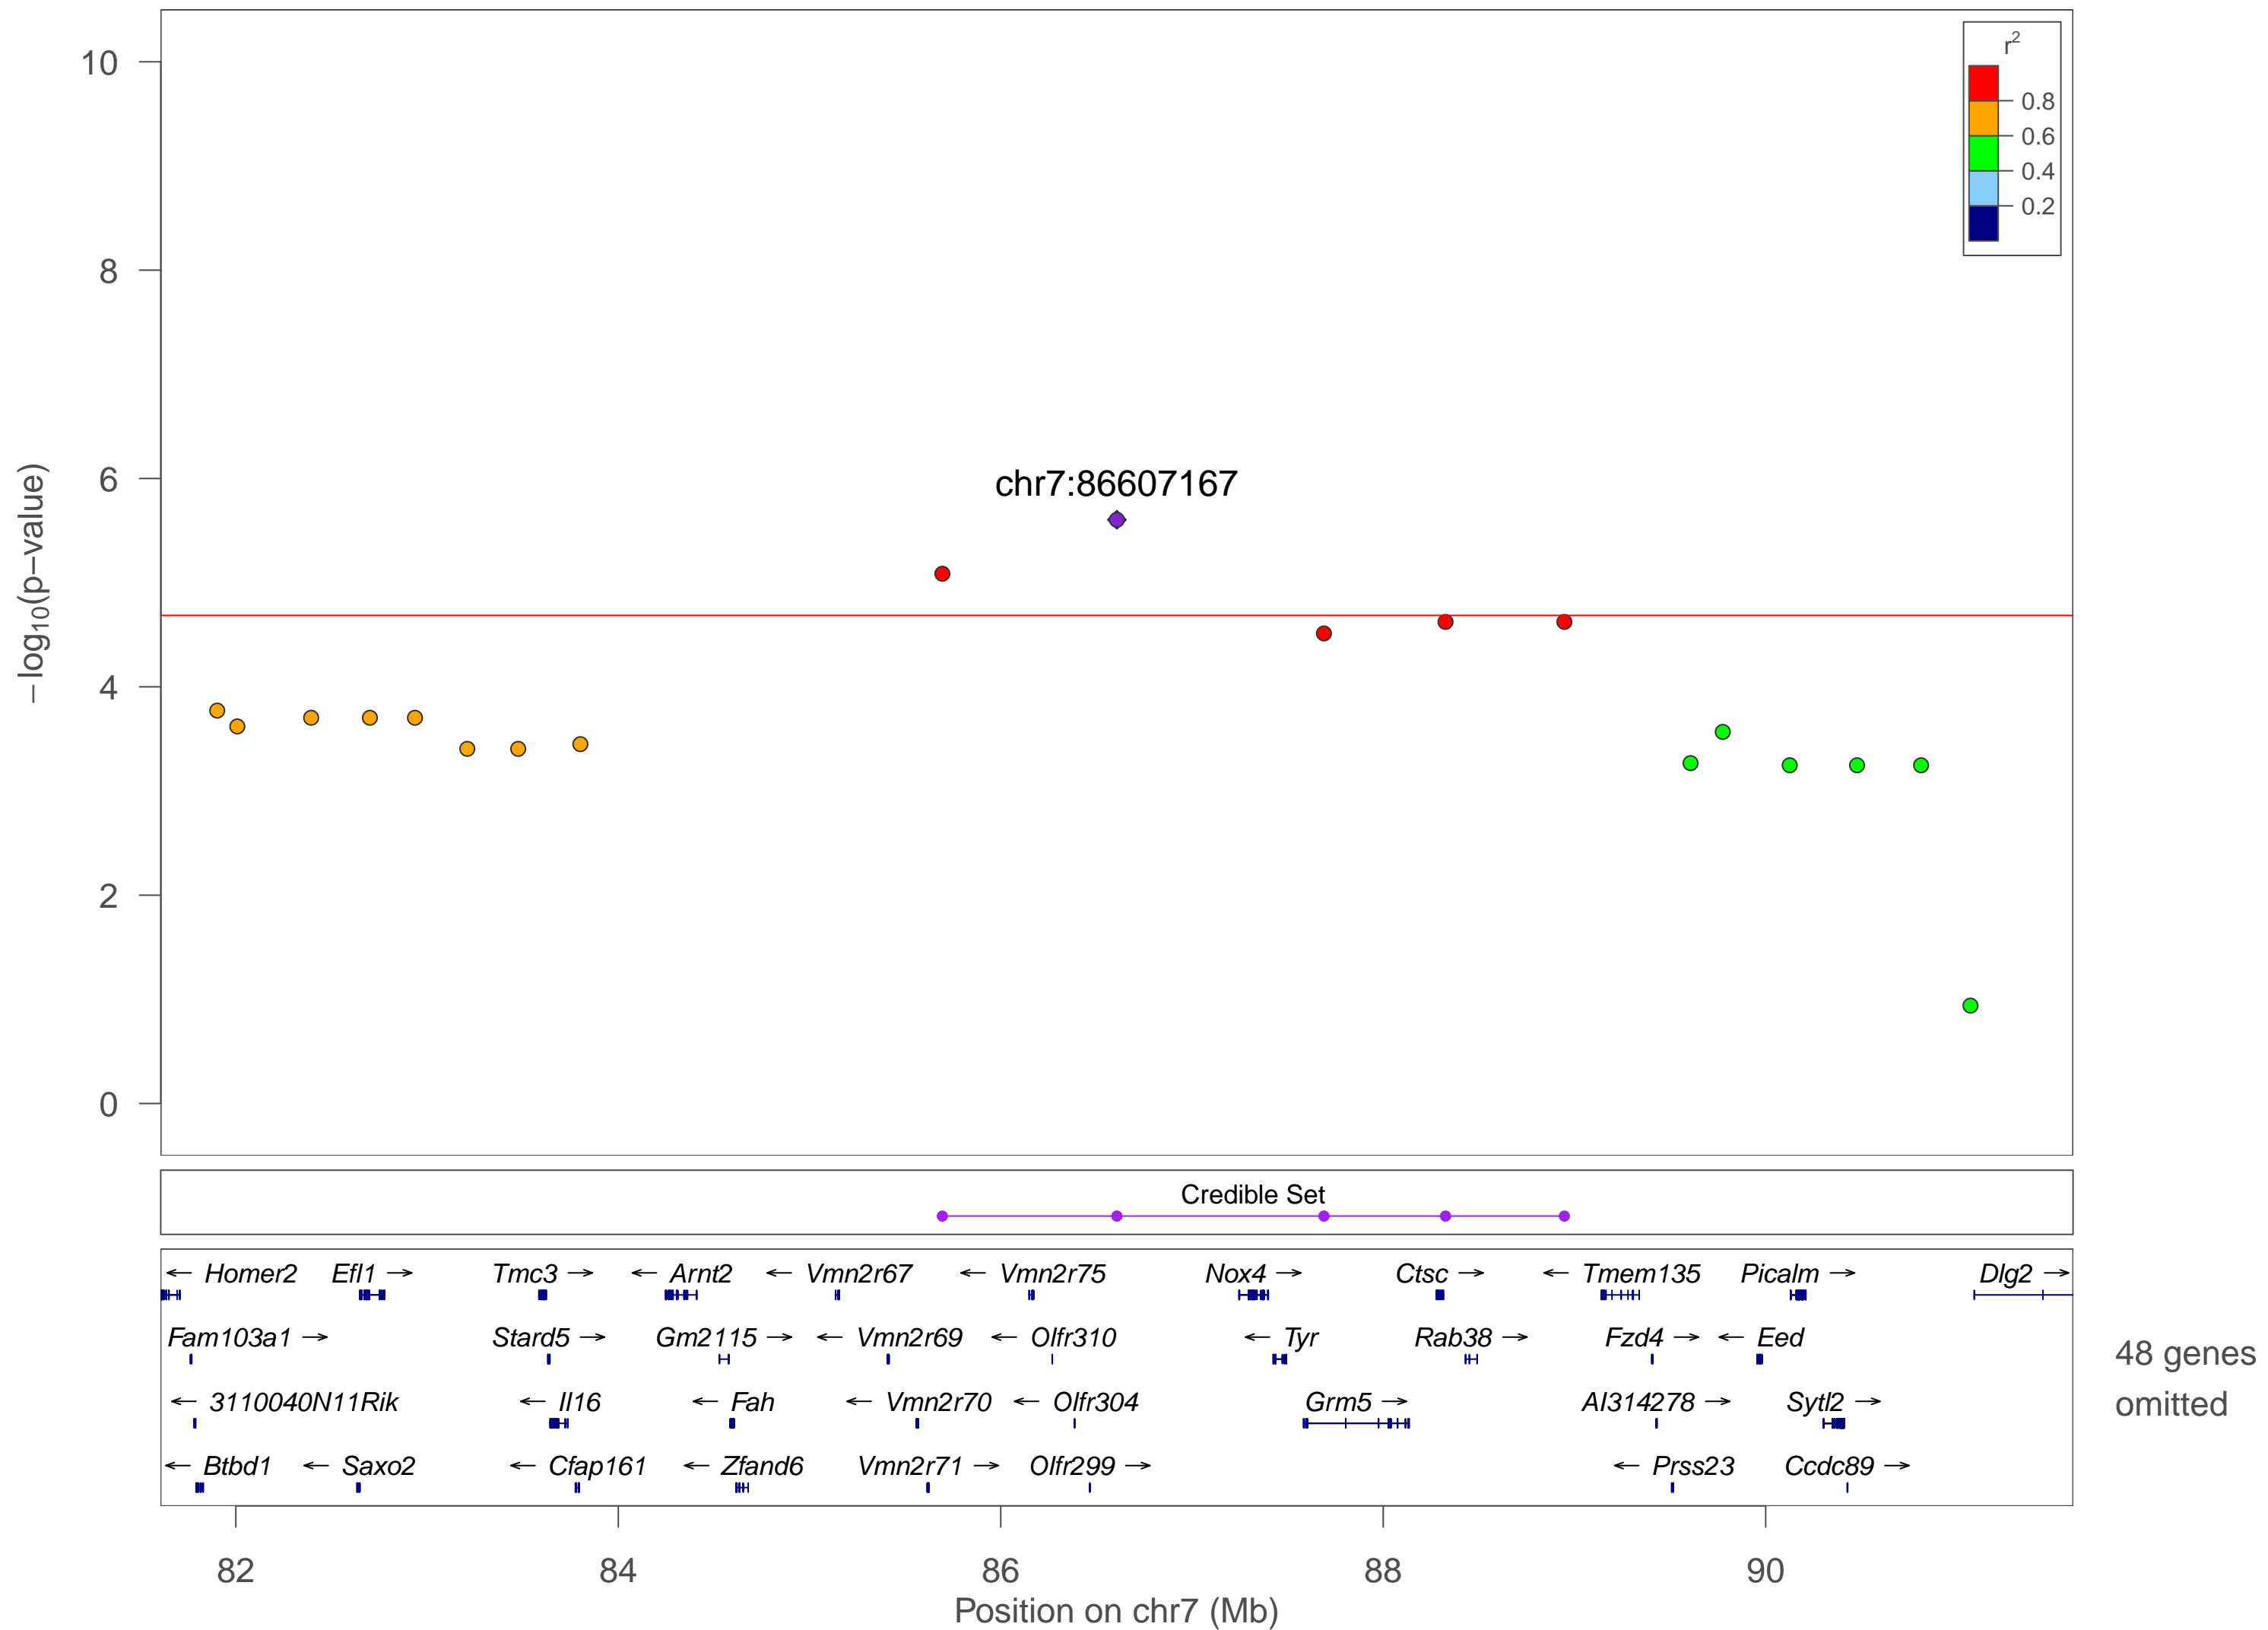



date: Thu Oct 25 16:47:30 2018  
build: F34Array  
display range: chr7:81607167–91607167 [81607167–91607167]  
hilite range: 0 – 0 [ 0 – 0 ]  
reference SNP: chr7:86607167  
number of SNPs plotted: 20  
min P-value: 2.49E–6 [chr7:86607167]  
max P-value: 1.15E–1 [chr7:91070939]  
omitted Genes: Tm6sf1, Hdgfrp3, Bnc1  
omitted Genes: Gm20744, Sh3gl3, Adamtsl3  
omitted Genes: 4933406J10Rik, Mex3b, 4933430H16Rik  
omitted Genes: Mesdc1, Mesdc2, Cemip  
omitted Genes: Abhd17c, 2610206C17Rik, Olfr291  
omitted Genes: Olfr290, Vmn2r65, Vmn2r66  
omitted Genes: Vmn2r68, Vmn2r72, Vmn2r73  
omitted Genes: Vmn2r74, Vmn2r76, Olfr309  
omitted Genes: Olfr308, Olfr307, Olfr305  
omitted Genes: Olfr303, Olfr301, Olfr298  
omitted Genes: Olfr297, Olfr295, Olfr294  
omitted Genes: Olfr293, Olfr292, Folh1  
omitted Genes: Vmn2r77, Vmn2r78, Vmn2r79  
omitted Genes: Me3, Ccdc81, I7Rn6  
omitted Genes: E230029C05Rik, 2310010J17Rik, Ccdc83  
omitted Genes: Crebzf, Tmem126a, Tmem126b

Fine-mapping Regions

| snp           | chr | pos (Mb) | pp         | group        | color  |
|---------------|-----|----------|------------|--------------|--------|
| chr7:85694603 | 7   | 85.69460 | 0.19438670 | Credible Set | purple |
| chr7:86607167 | 7   | 86.60717 | 0.60948915 | Credible Set | purple |
| chr7:87689885 | 7   | 87.68989 | 0.05528989 | Credible Set | purple |
| chr7:88325650 | 7   | 88.32565 | 0.07041713 | Credible Set | purple |
| chr7:88947234 | 7   | 88.94723 | 0.07041713 | Credible Set | purple |

F34 Array, routine CBC mean corpuscular hemoglobin

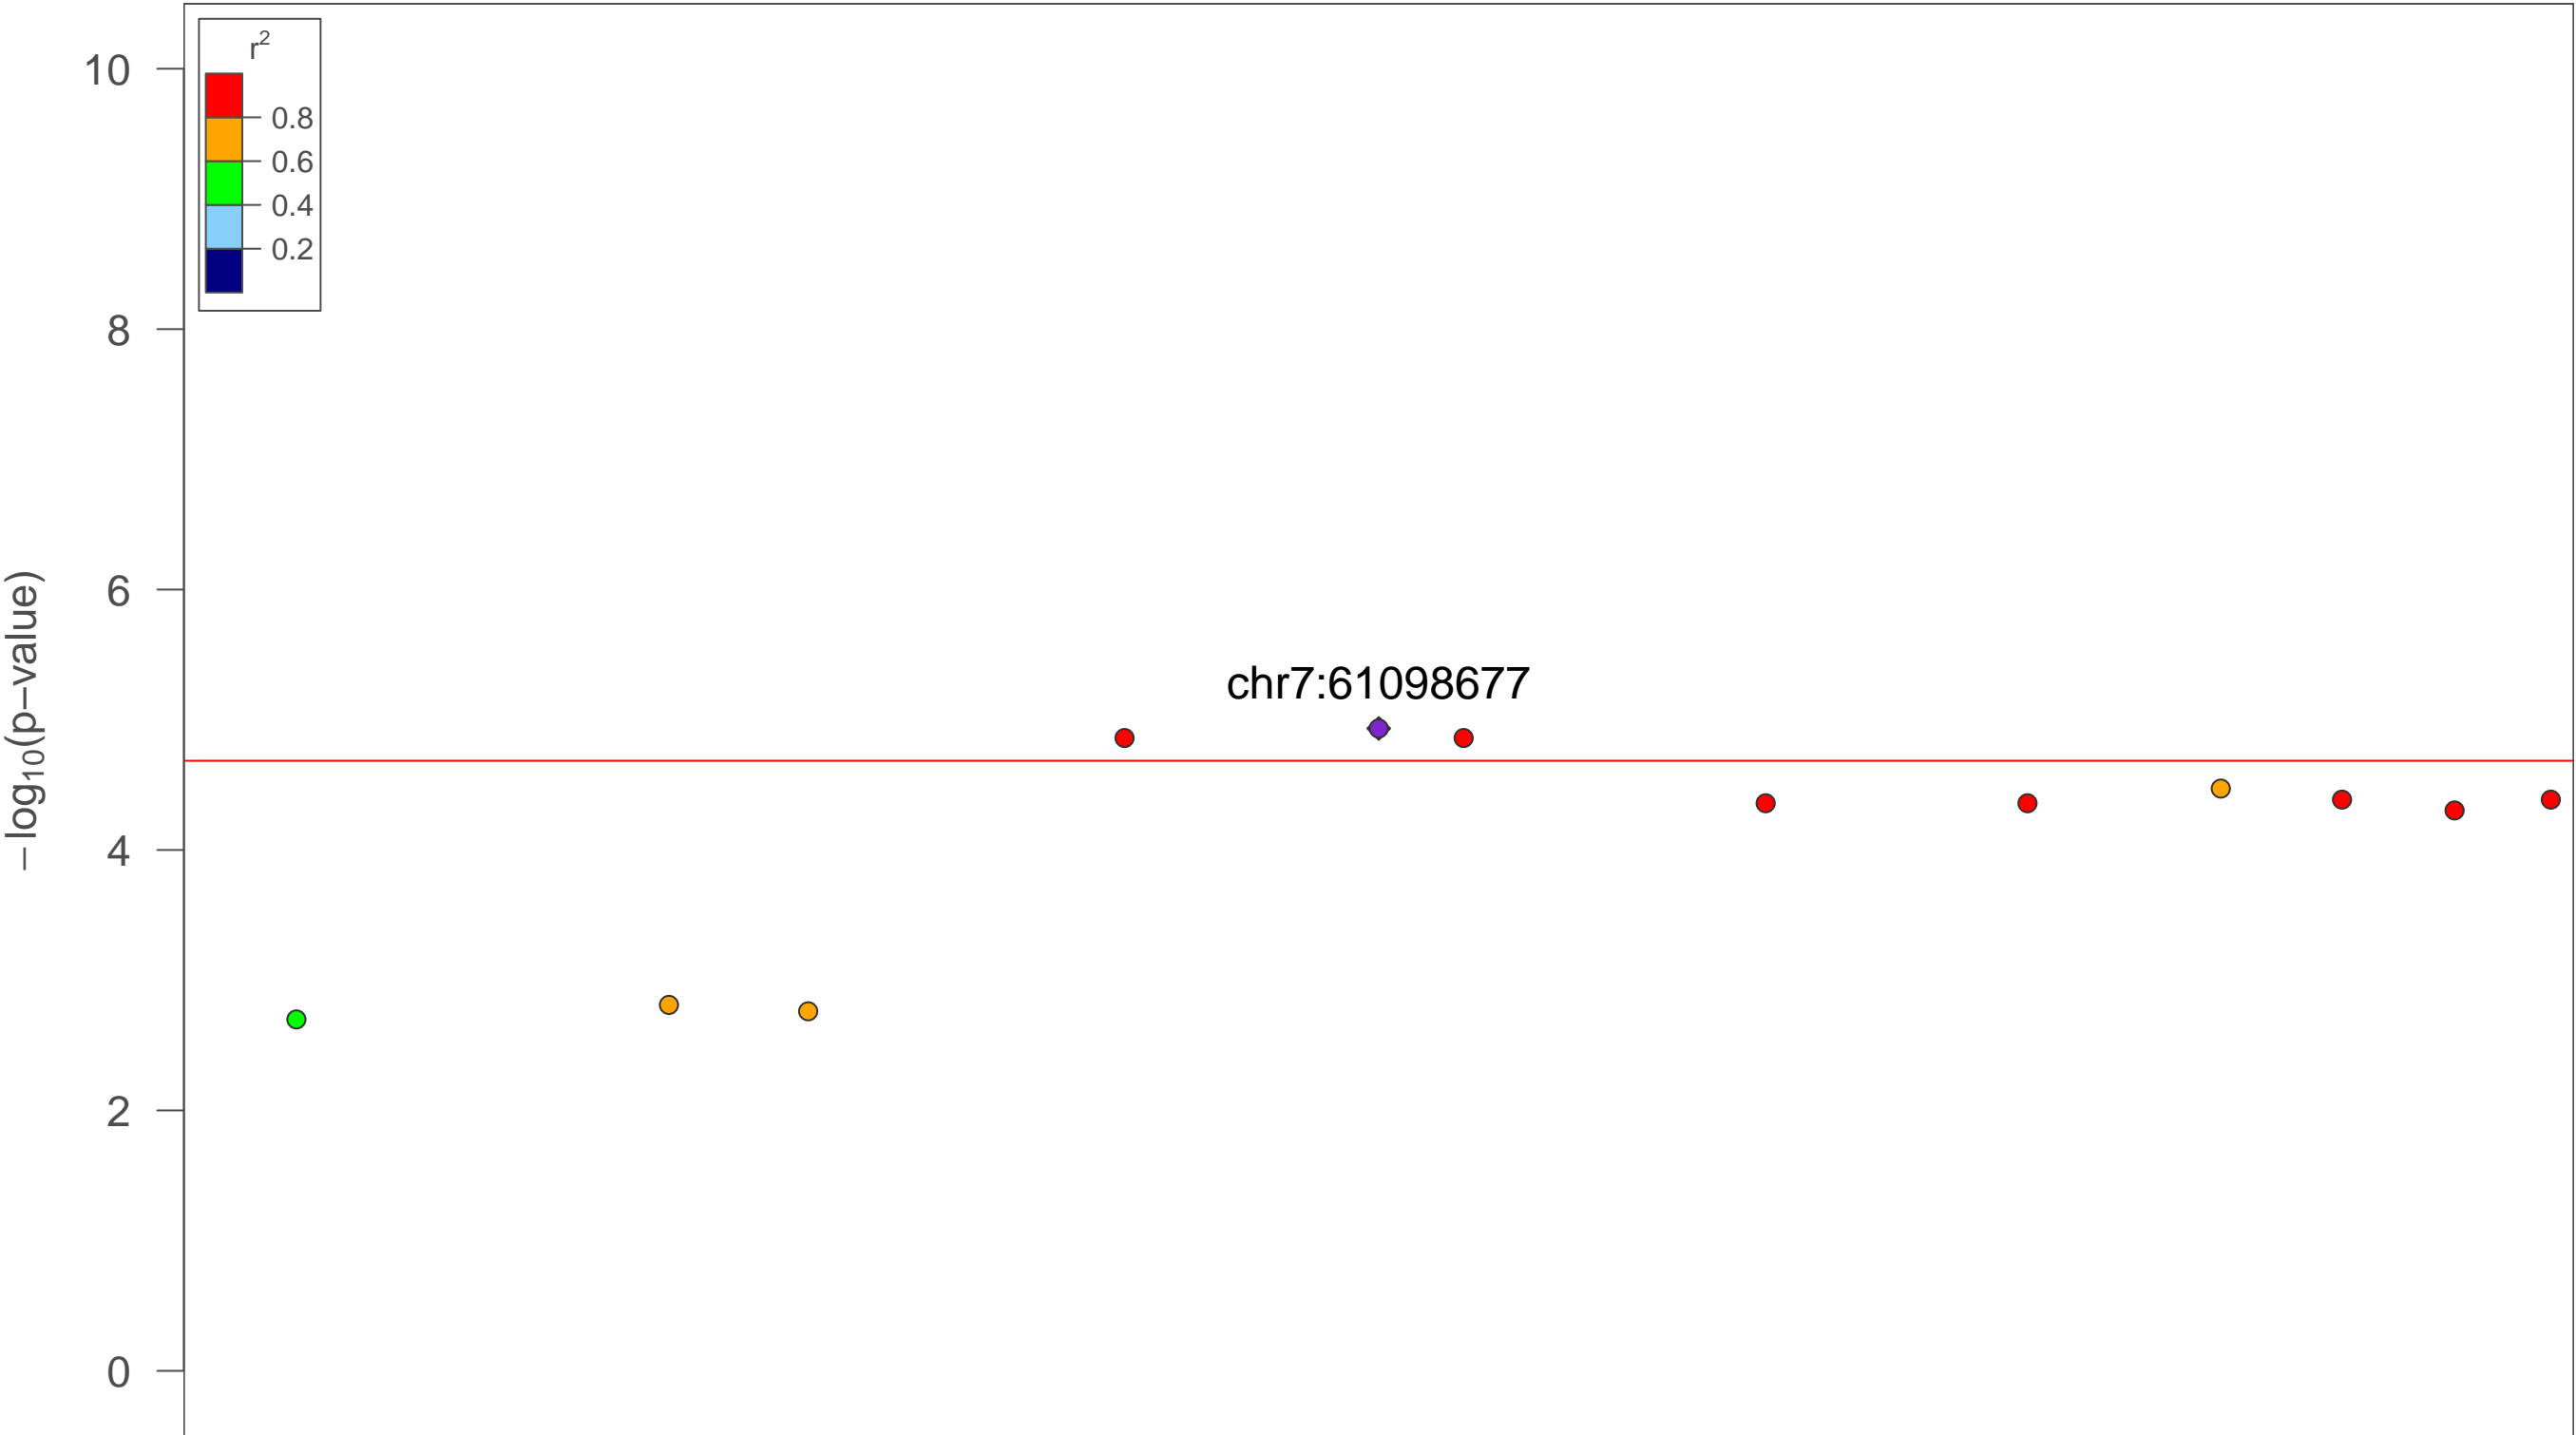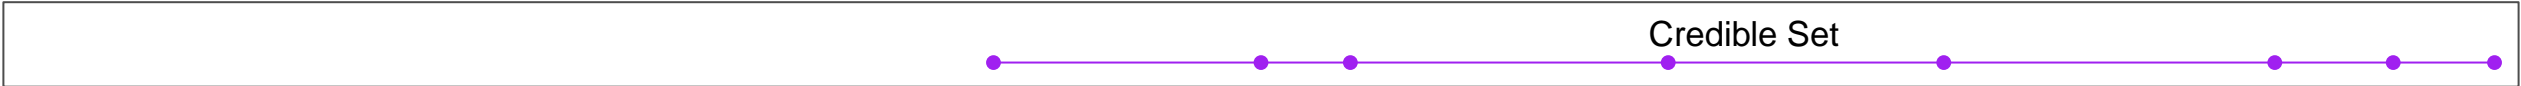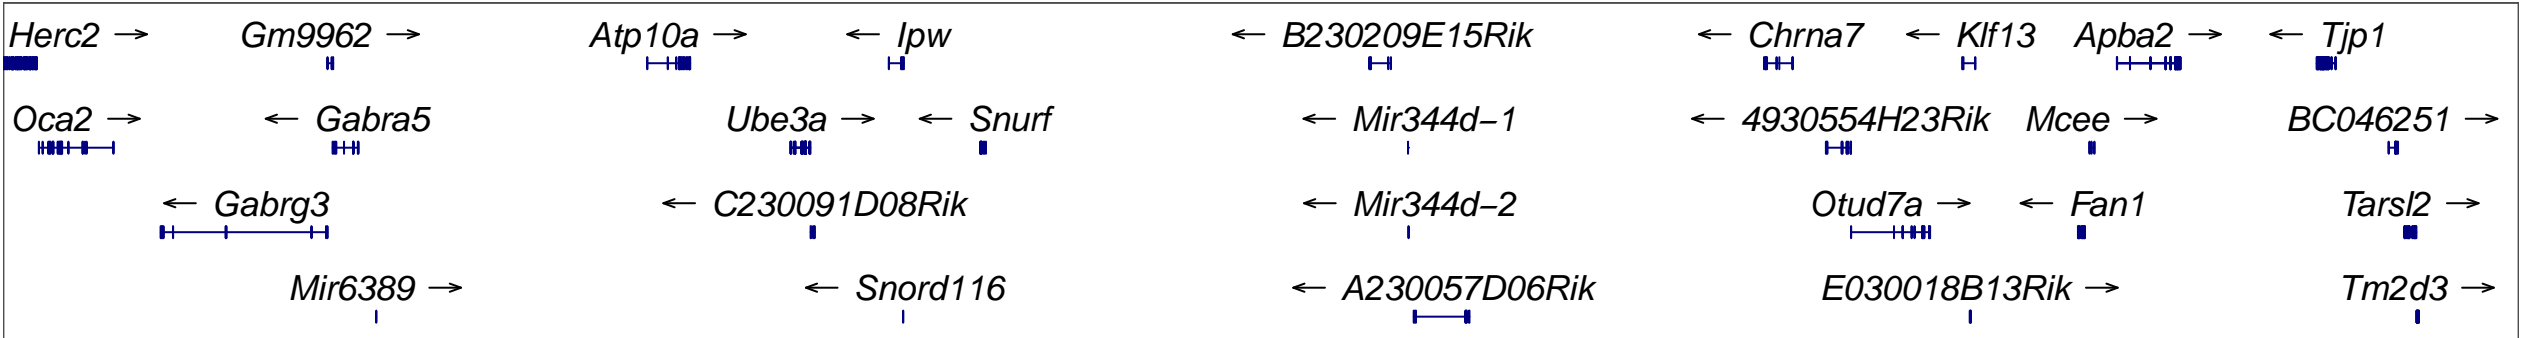

34 genes  
omitted

date: Thu Oct 25 16:52:02 2018

build: F34Array

display range: chr7:56098677–66098677 [56098677–66098677]

hilite range: 0 – 0 [ 0 – 0 ]

reference SNP: chr7:61098677

number of SNPs plotted: 13

min P-value: 1.17E–5 [chr7:61098677]

max P-value: 2E–3 [chr7:56569907]

omitted Genes: Gabrb3, Snord116l2, Snord116l1

omitted Genes: Snhg14, Snord64, Snrpn

omitted Genes: Gm7367, Mir344d–3, Mir344e

omitted Genes: Mir344h–1, Mir344h–2, Mir344b

omitted Genes: Mir344c, Mir344, Mir344–2

omitted Genes: A330076H08Rik, Mir344g, Mir344f

omitted Genes: Mir344i, Ndn, Magel2

omitted Genes: Mkrn3, Peg12, Trpm1

omitted Genes: Mir211, Mir6416, Mtmr10

omitted Genes: Mphosph10, Fam189a1, Ndnl2

omitted Genes: 1810008I18Rik, Pcsk6, Snrpa1

omitted Genes: Vimp

Fine-mapping Regions

| snp           | chr | pos (Mb) | pp         | group        | color  |
|---------------|-----|----------|------------|--------------|--------|
| chr7:60035047 | 7   | 60.03505 | 0.20630661 | Credible Set | purple |
| chr7:61098677 | 7   | 61.09868 | 0.24234896 | Credible Set | purple |
| chr7:61453986 | 7   | 61.45399 | 0.20630661 | Credible Set | purple |
| chr7:62717634 | 7   | 62.71763 | 0.06883805 | Credible Set | purple |
| chr7:63813305 | 7   | 63.81330 | 0.06883805 | Credible Set | purple |
| chr7:65129296 | 7   | 65.12930 | 0.07316961 | Credible Set | purple |
| chr7:65600162 | 7   | 65.60016 | 0.06102250 | Credible Set | purple |
| chr7:66002947 | 7   | 66.00295 | 0.07316961 | Credible Set | purple |

# F34 Array, routine CBC mean corpuscular hemoglobin concentration

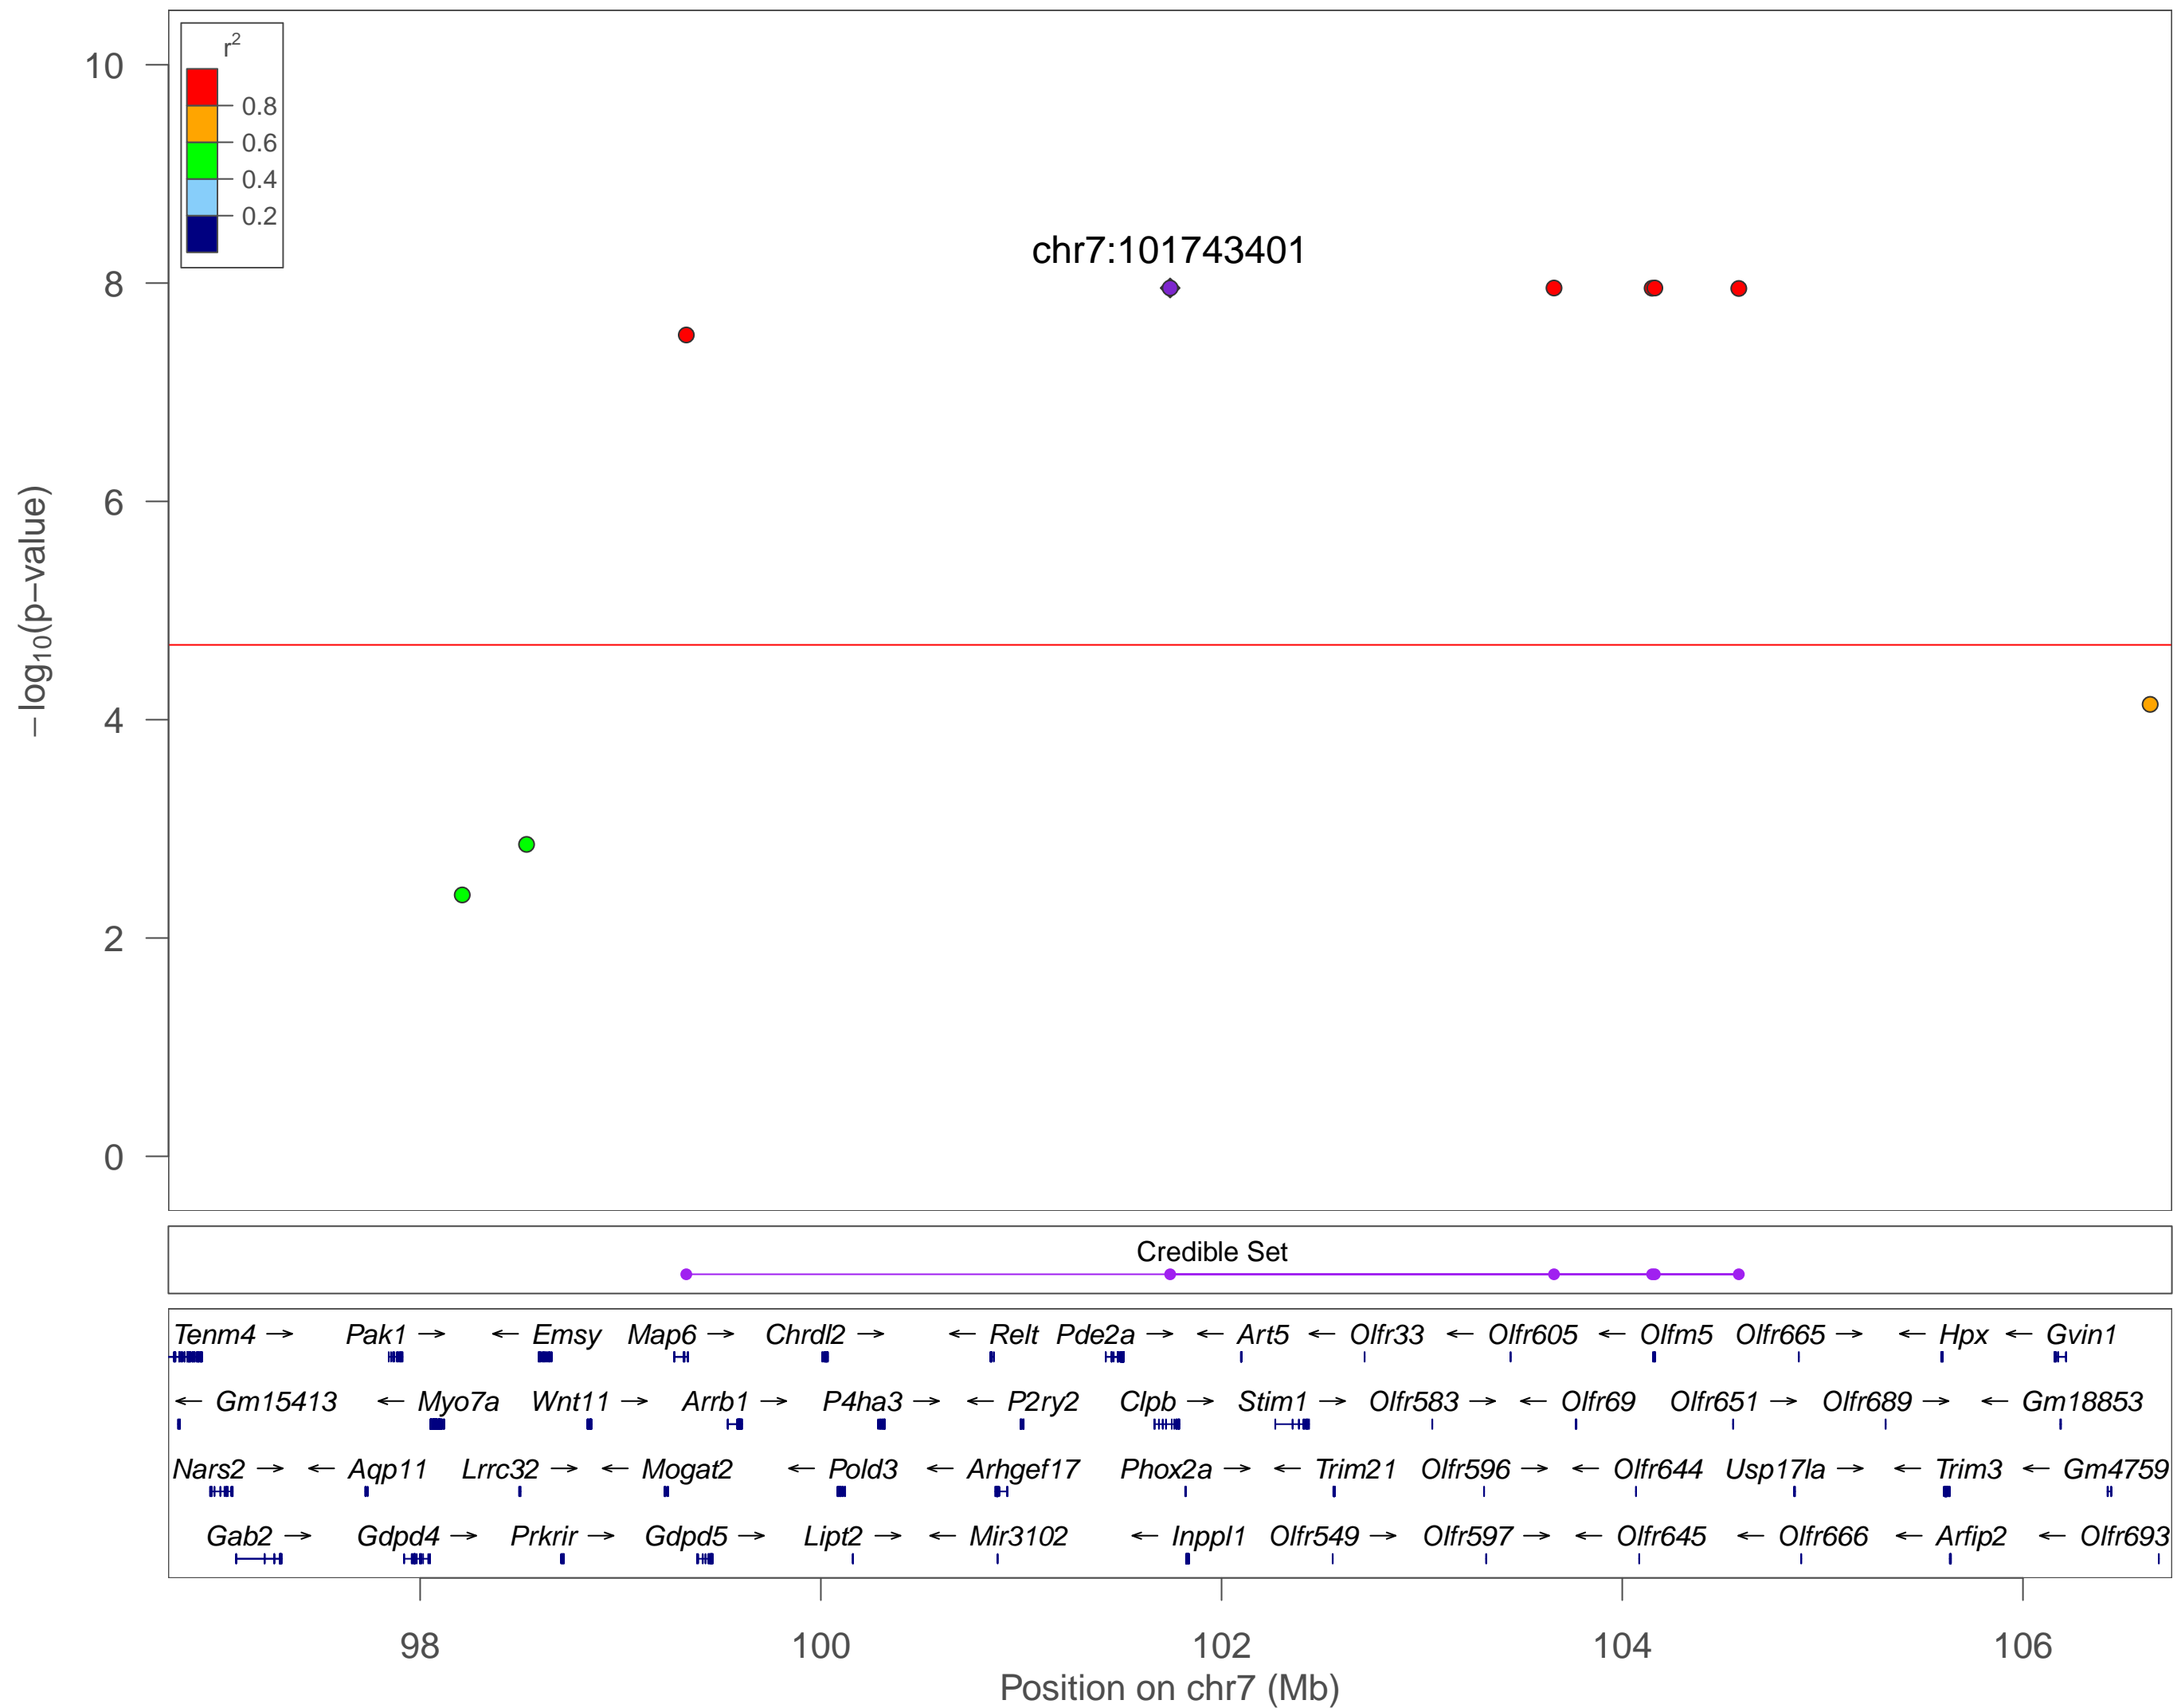

date: Thu Oct 25 16:52:13 2018

build: F34Array

display range: chr7:96743401–106743401 [96743401–106743401]

hilite range: 0 – 0 [ 0 – 0 ]

reference SNP: chr7:101743401

number of SNPs plotted: 10

min P-value: 1.11E–8 [chr7:101743401]

max P-value: 4.03E–3 [chr7:98210049]

omitted Genes: Usp35, Kctd21, Alg8

omitted Genes: Ndufc2, Thrsp, Kctd14

omitted Genes: Ints4, Aamdc, Rsf1

omitted Genes: Rsf1os1, Clns1a, Capn5

omitted Genes: Omp, Gm16938, B3gnt6

omitted Genes: Acer3, Tsku, Gucy2d

omitted Genes: Uvrag, Dgat2, Gm26705

omitted Genes: Serpinh1, Khlh35, Rps3

omitted Genes: Snord15b, Snord15a, Mir326

omitted Genes: Tpbgl, Slco2b1, Olfr520

omitted Genes: Olfr521, Neu3, Spcs2

omitted Genes: Xrra1, Rnf169, Kcne3

omitted Genes: Pgm2l1, Gpx2-ps1, Ppme1

omitted Genes: C2cd3, Ucp3, Ucp2

omitted Genes: Dnajb13, Coa4, Mrpl48

omitted Genes: Rab6a, Plekhhb1, Fam168a

omitted Genes: P2ry6, Fchsd2, Atg16l2

omitted Genes: Stard10, Arap1, Mir139

omitted Genes: Art2a-ps, Art2b, Folr2

omitted Genes: Folr1, Anapc15, Tomt

omitted Genes: Lamtor1, Lrrc51, Numa1

omitted Genes: Il18bp, Rnf121, Xndc1

omitted Genes: Xntrpc, Trpc2, Art1

omitted Genes: Chrna10, Nup98, Pgap2

omitted Genes: Rhog, Rrm1, Olfr543

omitted Genes: Olfr544, Olfr545, Olfr547

omitted Genes: Olfr550, Olfr551, Olfr552

omitted Genes: Olfr553, Olfr554, Olfr555

omitted Genes: Olfr556, Trim68, Olfr557

omitted Genes: Olfr558, Olfr559, Olfr78

omitted Genes: Olfr560, Olfr561, Olfr564

omitted Genes: Olfr566, Olfr568, Olfr569

Make more plots at <http://csg.sph.umich.edu/locuszoom/>

Fine-mapping Regions

| snp            | chr | pos (Mb)  | pp         | group        | color  |
|----------------|-----|-----------|------------|--------------|--------|
| chr7:99328376  | 7   | 99.32838  | 0.07118739 | Credible Set | purple |
| chr7:101743401 | 7   | 101.74340 | 0.18627943 | Credible Set | purple |
| chr7:103659355 | 7   | 103.65936 | 0.18627943 | Credible Set | purple |
| chr7:104149022 | 7   | 104.14902 | 0.18547207 | Credible Set | purple |
| chr7:104162444 | 7   | 104.16244 | 0.18627943 | Credible Set | purple |
| chr7:104581631 | 7   | 104.58163 | 0.18450225 | Credible Set | purple |



F34 Array, routine CBC cell hemoglobin concentration mean

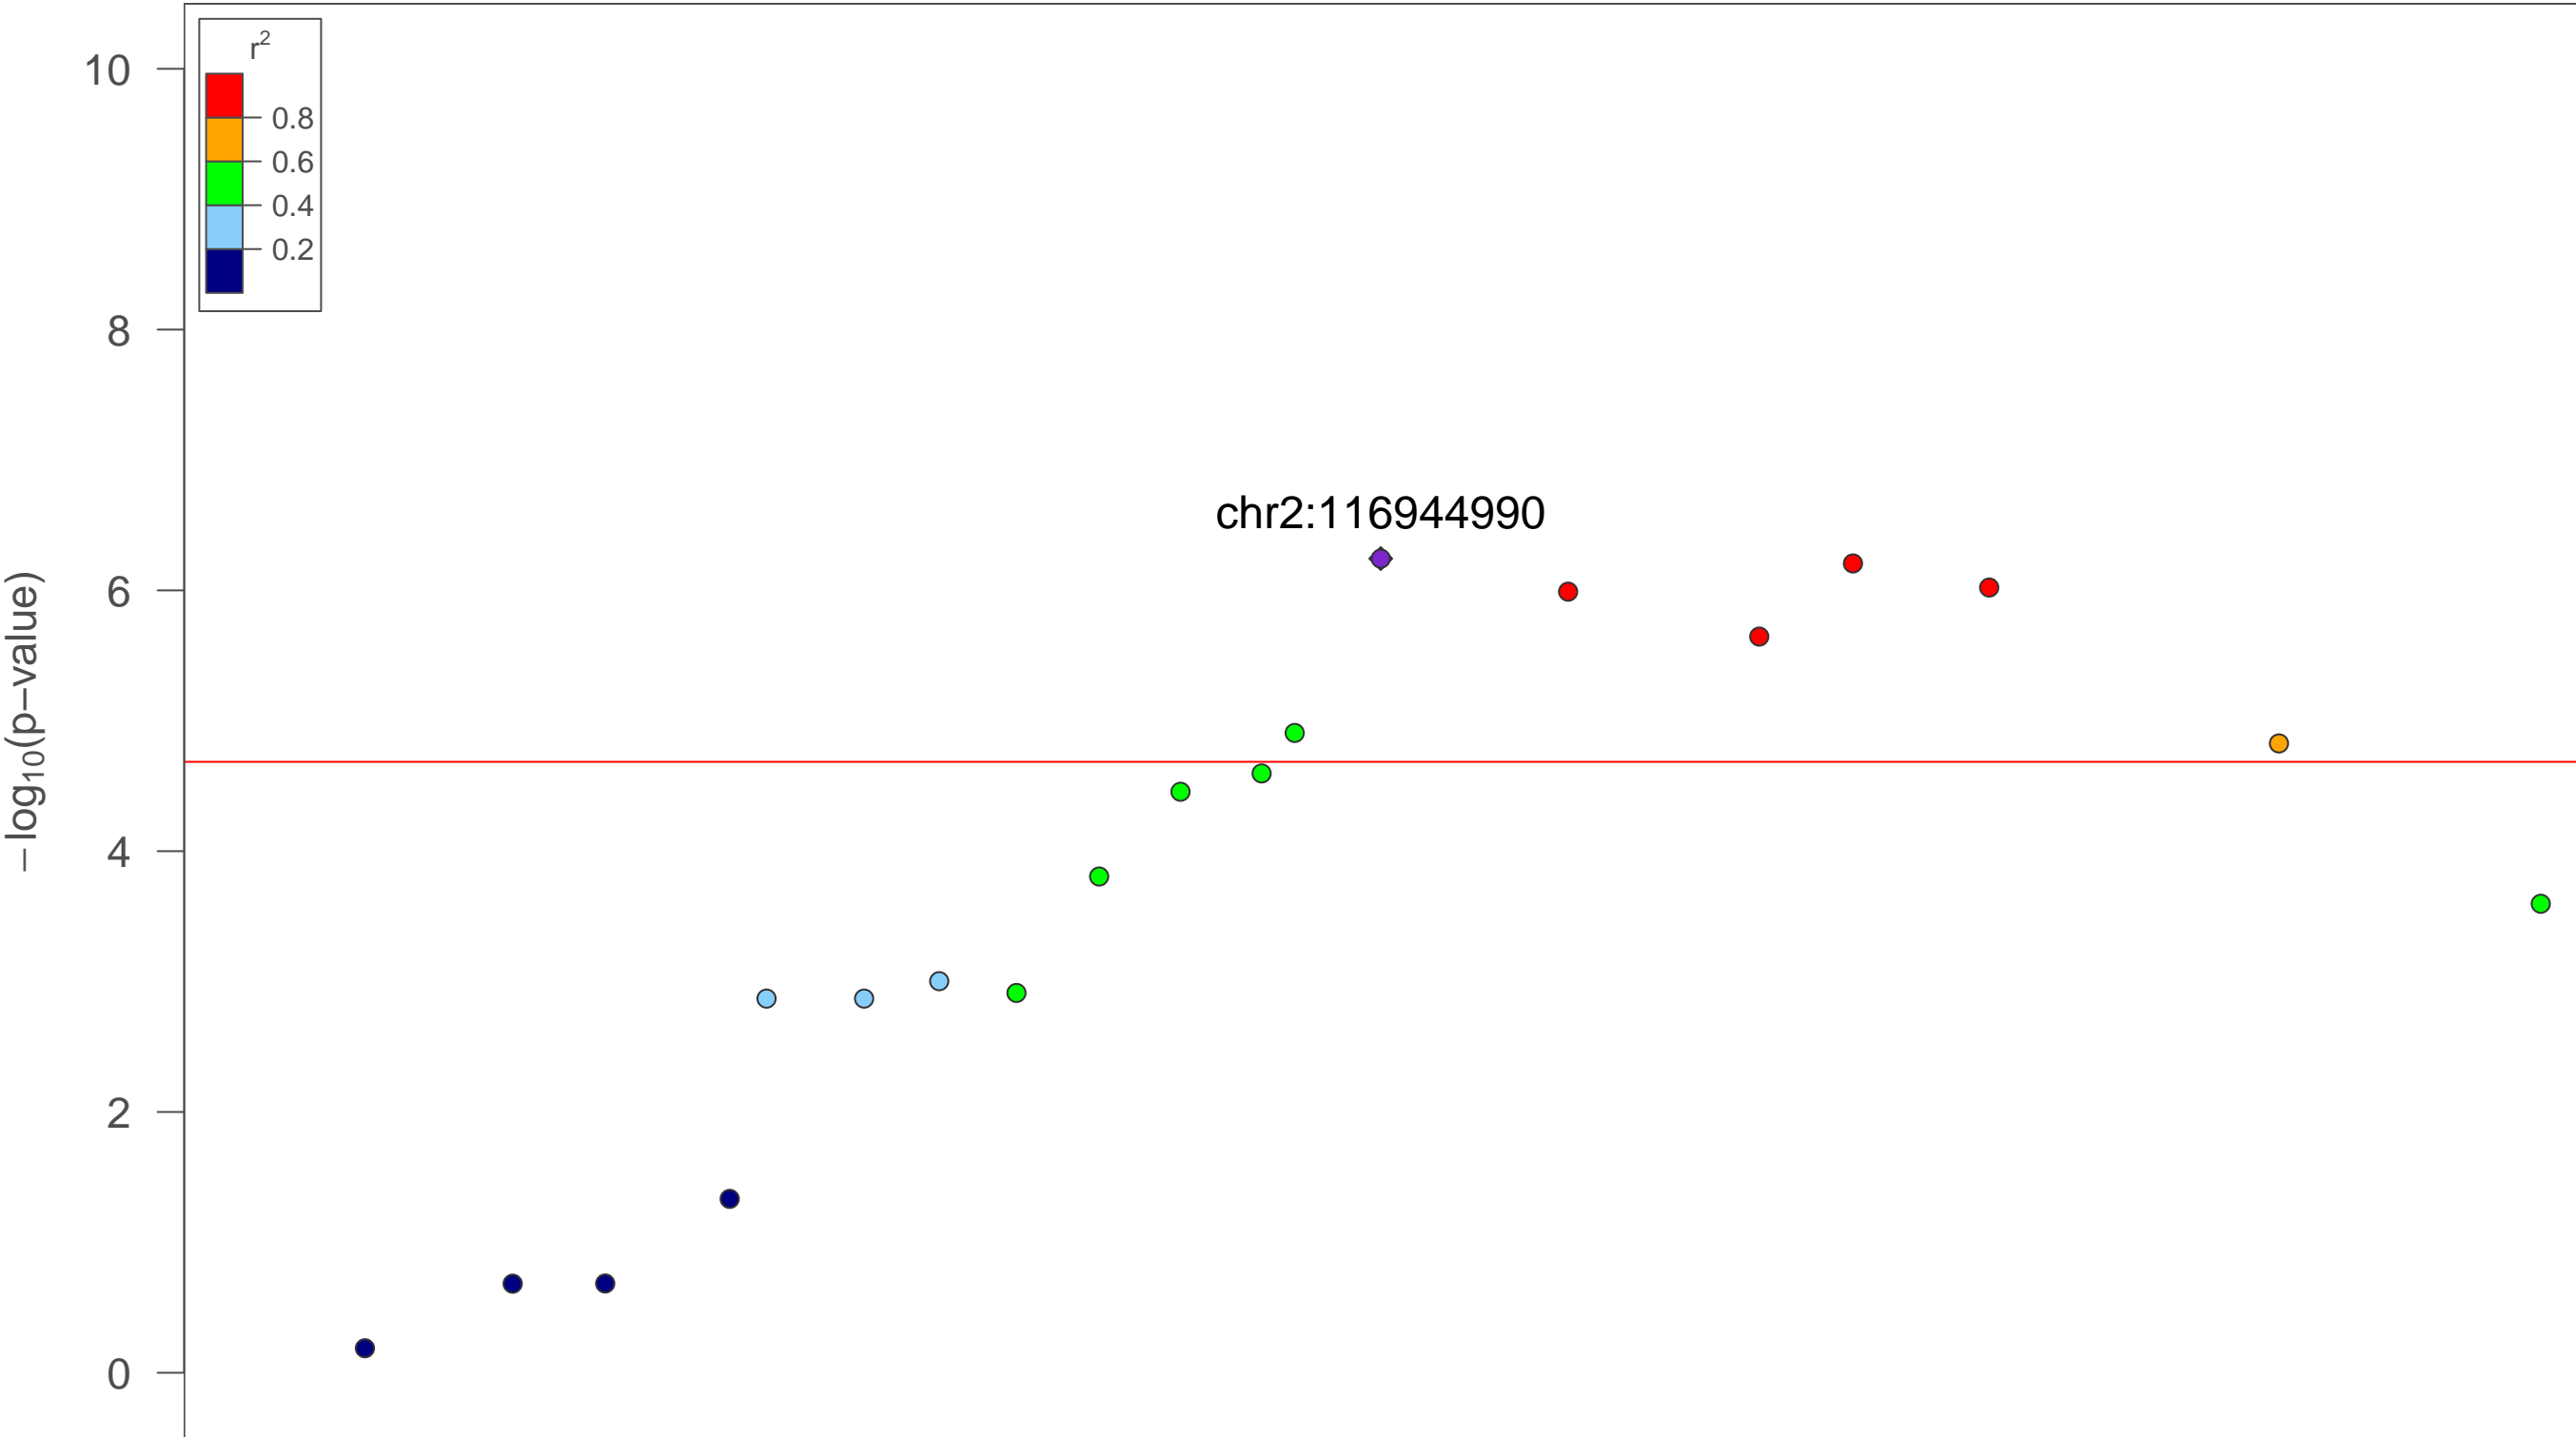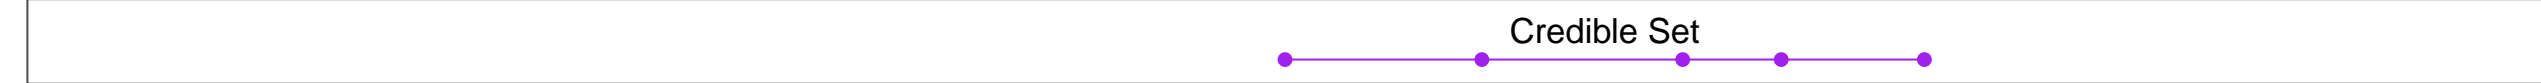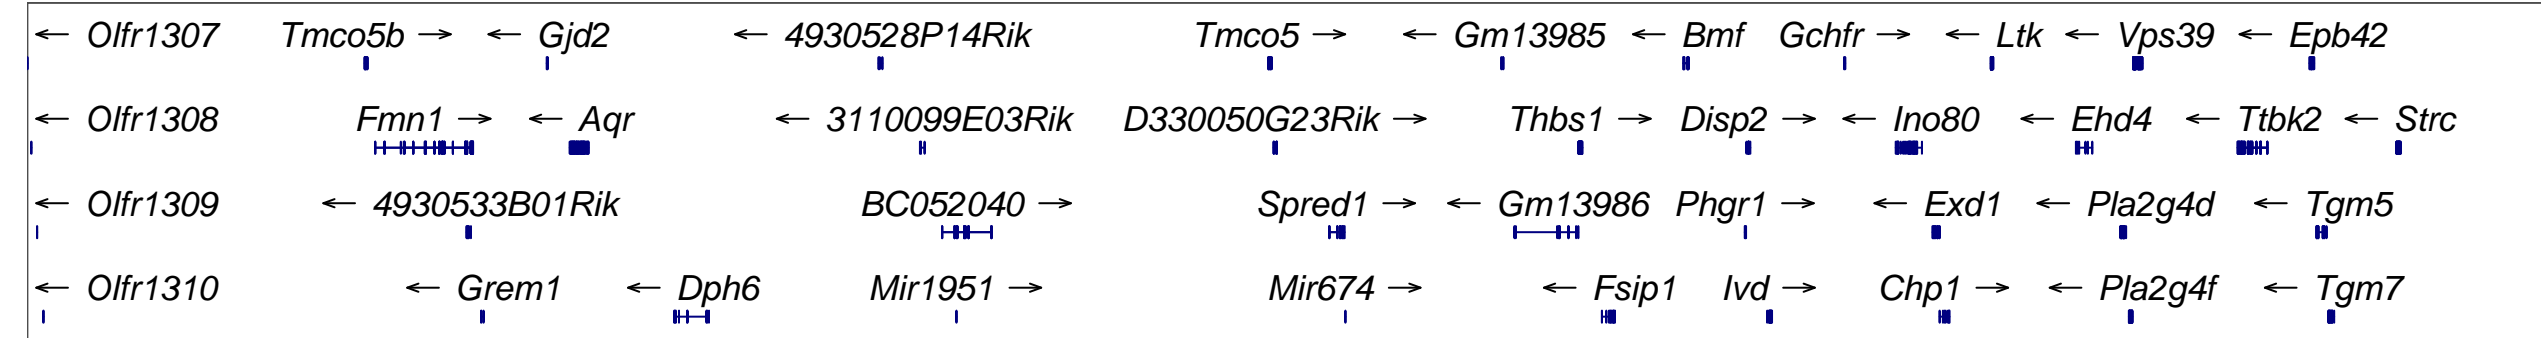

104 genes  
omitted

112 114 116 118 120

Position on chr2 (Mb)

date: Thu Oct 25 16:52:29 2018

build: F34Array

display range: chr2:111944990–121944990 [111944990–121944990]

hilite range: 0 – 0 [ 0 – 0 ]

reference SNP: chr2:116944990

number of SNPs plotted: 20

min P-value: 5.7E–7 [chr2:116944990]

max P-value: 6.48E–1 [chr2:112700792]

omitted Genes: Olfr1311, Olfr1312, Olfr1313

omitted Genes: Olfr1314, Olfr1316, Olfr1317

omitted Genes: Olfr1318, Lpcat4, Nutm1

omitted Genes: Nop10, Slc12a6, Emc4

omitted Genes: Katnbl1, Emc7, Chrm5

omitted Genes: Aven, Ryr3, Scg5

omitted Genes: Arhgap11a, A530058N18Rik, Actc1

omitted Genes: C130080G10Rik, Mir7002, Zfp770

omitted Genes: Meis2, 2810405F15Rik, Fam98b

omitted Genes: Rasgrp1, 4930412B13Rik, Gpr176

omitted Genes: 1700054M17Rik, Eif2ak4, Srp14

omitted Genes: Bub1b, Pak6, Ankrd63

omitted Genes: Plcb2, Inafm2, A430105I19Rik

omitted Genes: Knstrn, Bahd1, Chst14

omitted Genes: Ccdc32, Rpusd2, Casc5

omitted Genes: Rad51, Rmdn3, Dnajc17

omitted Genes: Gm14137, Zfyve19, Ppp1r14d

omitted Genes: Spint1, Rhov, Vps18

omitted Genes: Gm14207, Dll4, Chac1

omitted Genes: 1700020I14Rik, Oip5, Nusap1

omitted Genes: Ndufaf1, Rtf1, Itpka

omitted Genes: Rpap1, Tyro3, Mga

omitted Genes: Mapkbp1, Mir7665, Jmjd7

omitted Genes: Gm28042, Pla2g4b, Pla2g4e

omitted Genes: Tmem87a, Ganc, 4931402G19Rik

omitted Genes: Capn3, Zfp106, Snap23

omitted Genes: Lrrc57, Haus2, Cdan1

omitted Genes: AV039307, Ubr1, Tmem62

omitted Genes: Ccndbp1, Lcmt2, Adal

omitted Genes: Zscan29, Tubgcp4, Trp53bp1

omitted Genes: Map1a, Ppip5k1, Gkmt1

omitted Genes: Catsper2, Rdia3, E112

Make more plots at <http://csg.sph.umich.edu/locuszoom/>

Fine-mapping Regions

| snp            | chr | pos (Mb) | pp         | group        | color  |
|----------------|-----|----------|------------|--------------|--------|
| chr2:116944990 | 2   | 116.9450 | 0.29685060 | Credible Set | purple |
| chr2:117727776 | 2   | 117.7278 | 0.16923215 | Credible Set | purple |
| chr2:118526291 | 2   | 118.5263 | 0.07893283 | Credible Set | purple |
| chr2:118917838 | 2   | 118.9178 | 0.27342629 | Credible Set | purple |
| chr2:119486992 | 2   | 119.4870 | 0.18155814 | Credible Set | purple |

F34 Array, routine CBC cell hemoglobin concentration mean

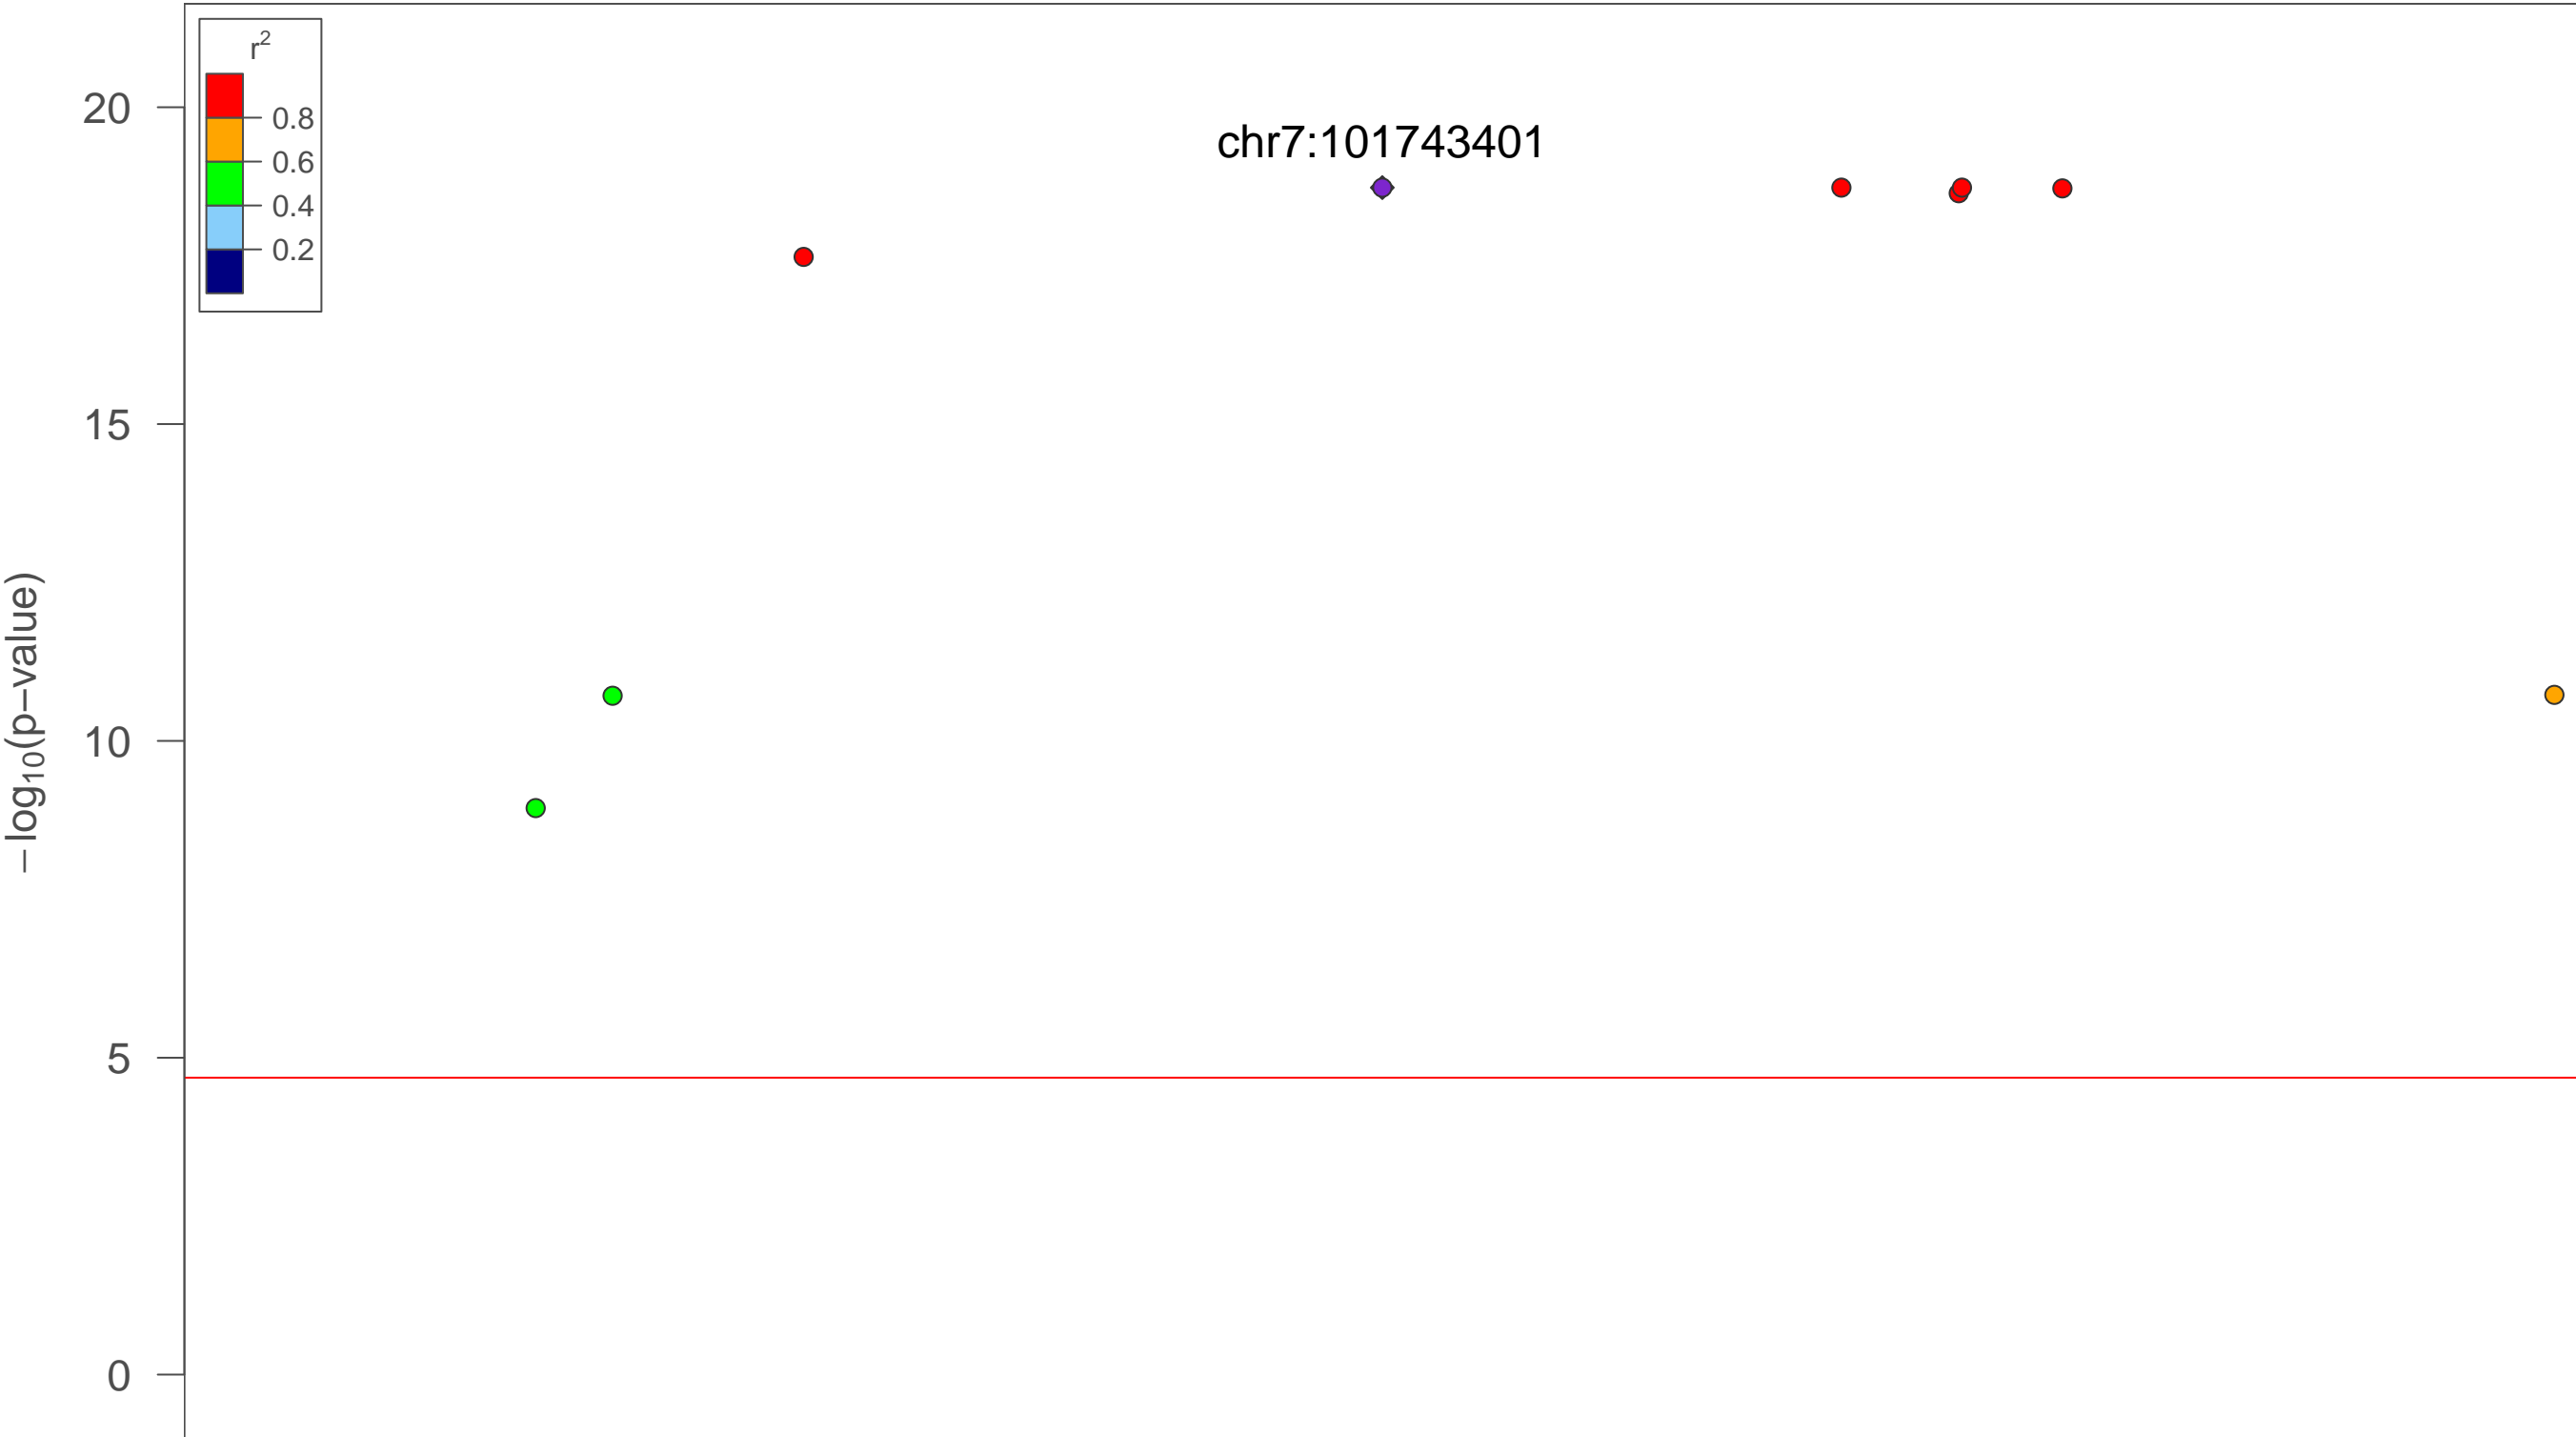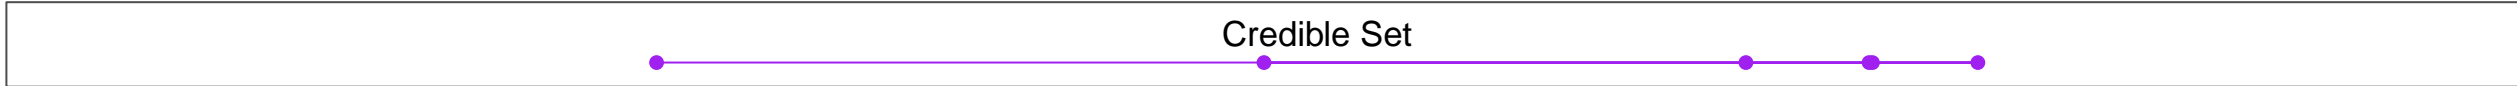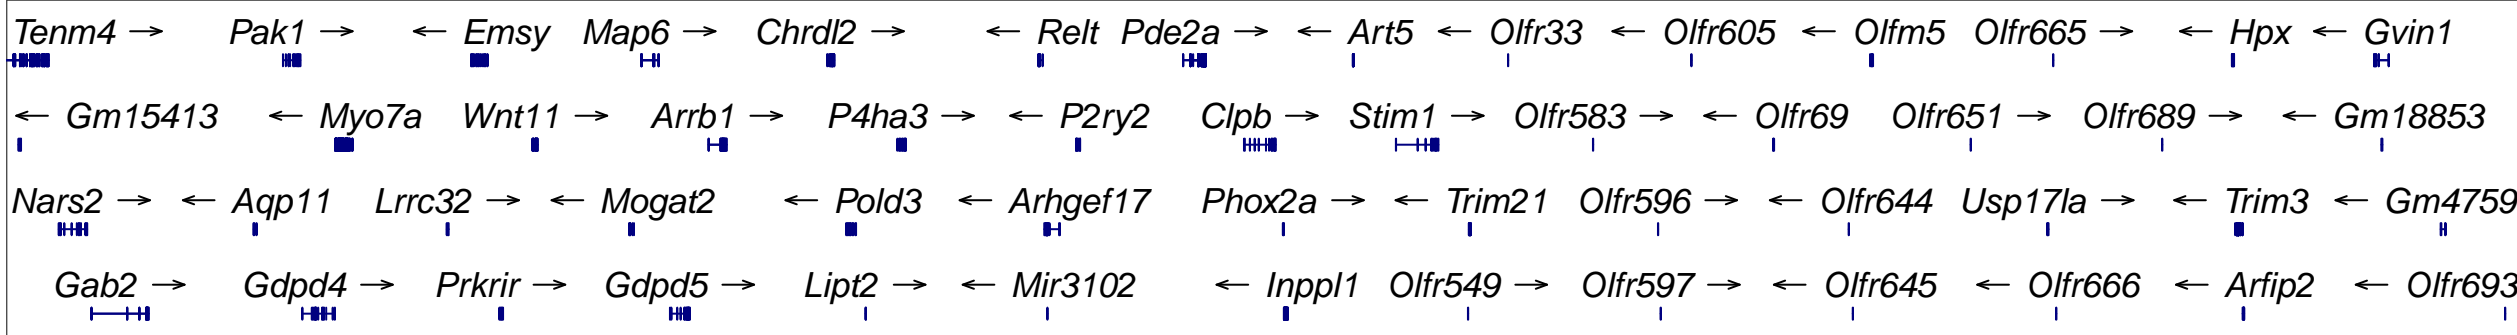

232 genes  
omitted

date: Thu Oct 25 16:52:40 2018

build: F34Array

display range: chr7:96743401–106743401 [96743401–106743401]

hilite range: 0 – 0 [ 0 – 0 ]

reference SNP: chr7:101743401

number of SNPs plotted: 10

min P-value: 1.85E–19 [chr7:101743401]

max P-value: 1.15E–9 [chr7:98210049]

omitted Genes: Usp35, Kctd21, Alg8

omitted Genes: Ndufc2, Thrsp, Kctd14

omitted Genes: Ints4, Aamdc, Rsf1

omitted Genes: Rsf1os1, Clns1a, Capn5

omitted Genes: Omp, Gm16938, B3gnt6

omitted Genes: Acer3, Tsku, Gucy2d

omitted Genes: Uvrag, Dgat2, Gm26705

omitted Genes: Serpinh1, Khlh35, Rps3

omitted Genes: Snord15b, Snord15a, Mir326

omitted Genes: Tpbgl, Slco2b1, Olfr520

omitted Genes: Olfr521, Neu3, Spcs2

omitted Genes: Xrra1, Rnf169, Kcne3

omitted Genes: Pgm2l1, Gpx2-ps1, Ppme1

omitted Genes: C2cd3, Ucp3, Ucp2

omitted Genes: Dnajb13, Coa4, Mrpl48

omitted Genes: Rab6a, Plekhhb1, Fam168a

omitted Genes: P2ry6, Fchsd2, Atg16l2

omitted Genes: Stard10, Arap1, Mir139

omitted Genes: Art2a-ps, Art2b, Folr2

omitted Genes: Folr1, Anapc15, Tomt

omitted Genes: Lamtor1, Lrrc51, Numa1

omitted Genes: Il18bp, Rnf121, Xndc1

omitted Genes: Xntrpc, Trpc2, Art1

omitted Genes: Chrna10, Nup98, Pgap2

omitted Genes: Rhog, Rrm1, Olfr543

omitted Genes: Olfr544, Olfr545, Olfr547

omitted Genes: Olfr550, Olfr551, Olfr552

omitted Genes: Olfr553, Olfr554, Olfr555

omitted Genes: Olfr556, Trim68, Olfr557

omitted Genes: Olfr558, Olfr559, Olfr78

omitted Genes: Olfr560, Olfr561, Olfr564

omitted Genes: Olfr566, Olfr568, Olfr569

Make more plots at <http://csg.sph.umich.edu/locuszoom/>

Fine-mapping Regions

| snp            | chr | pos (Mb)  | pp         | group        | color  |
|----------------|-----|-----------|------------|--------------|--------|
| chr7:99328376  | 7   | 99.32838  | 0.01707747 | Credible Set | purple |
| chr7:101743401 | 7   | 101.74340 | 0.20517644 | Credible Set | purple |
| chr7:103659355 | 7   | 103.65936 | 0.20517644 | Credible Set | purple |
| chr7:104149022 | 7   | 104.14902 | 0.16778480 | Credible Set | purple |
| chr7:104162444 | 7   | 104.16244 | 0.20517644 | Credible Set | purple |
| chr7:104581631 | 7   | 104.58163 | 0.19960843 | Credible Set | purple |

F34 Array, routine CBC cell hemoglobin concentration mean

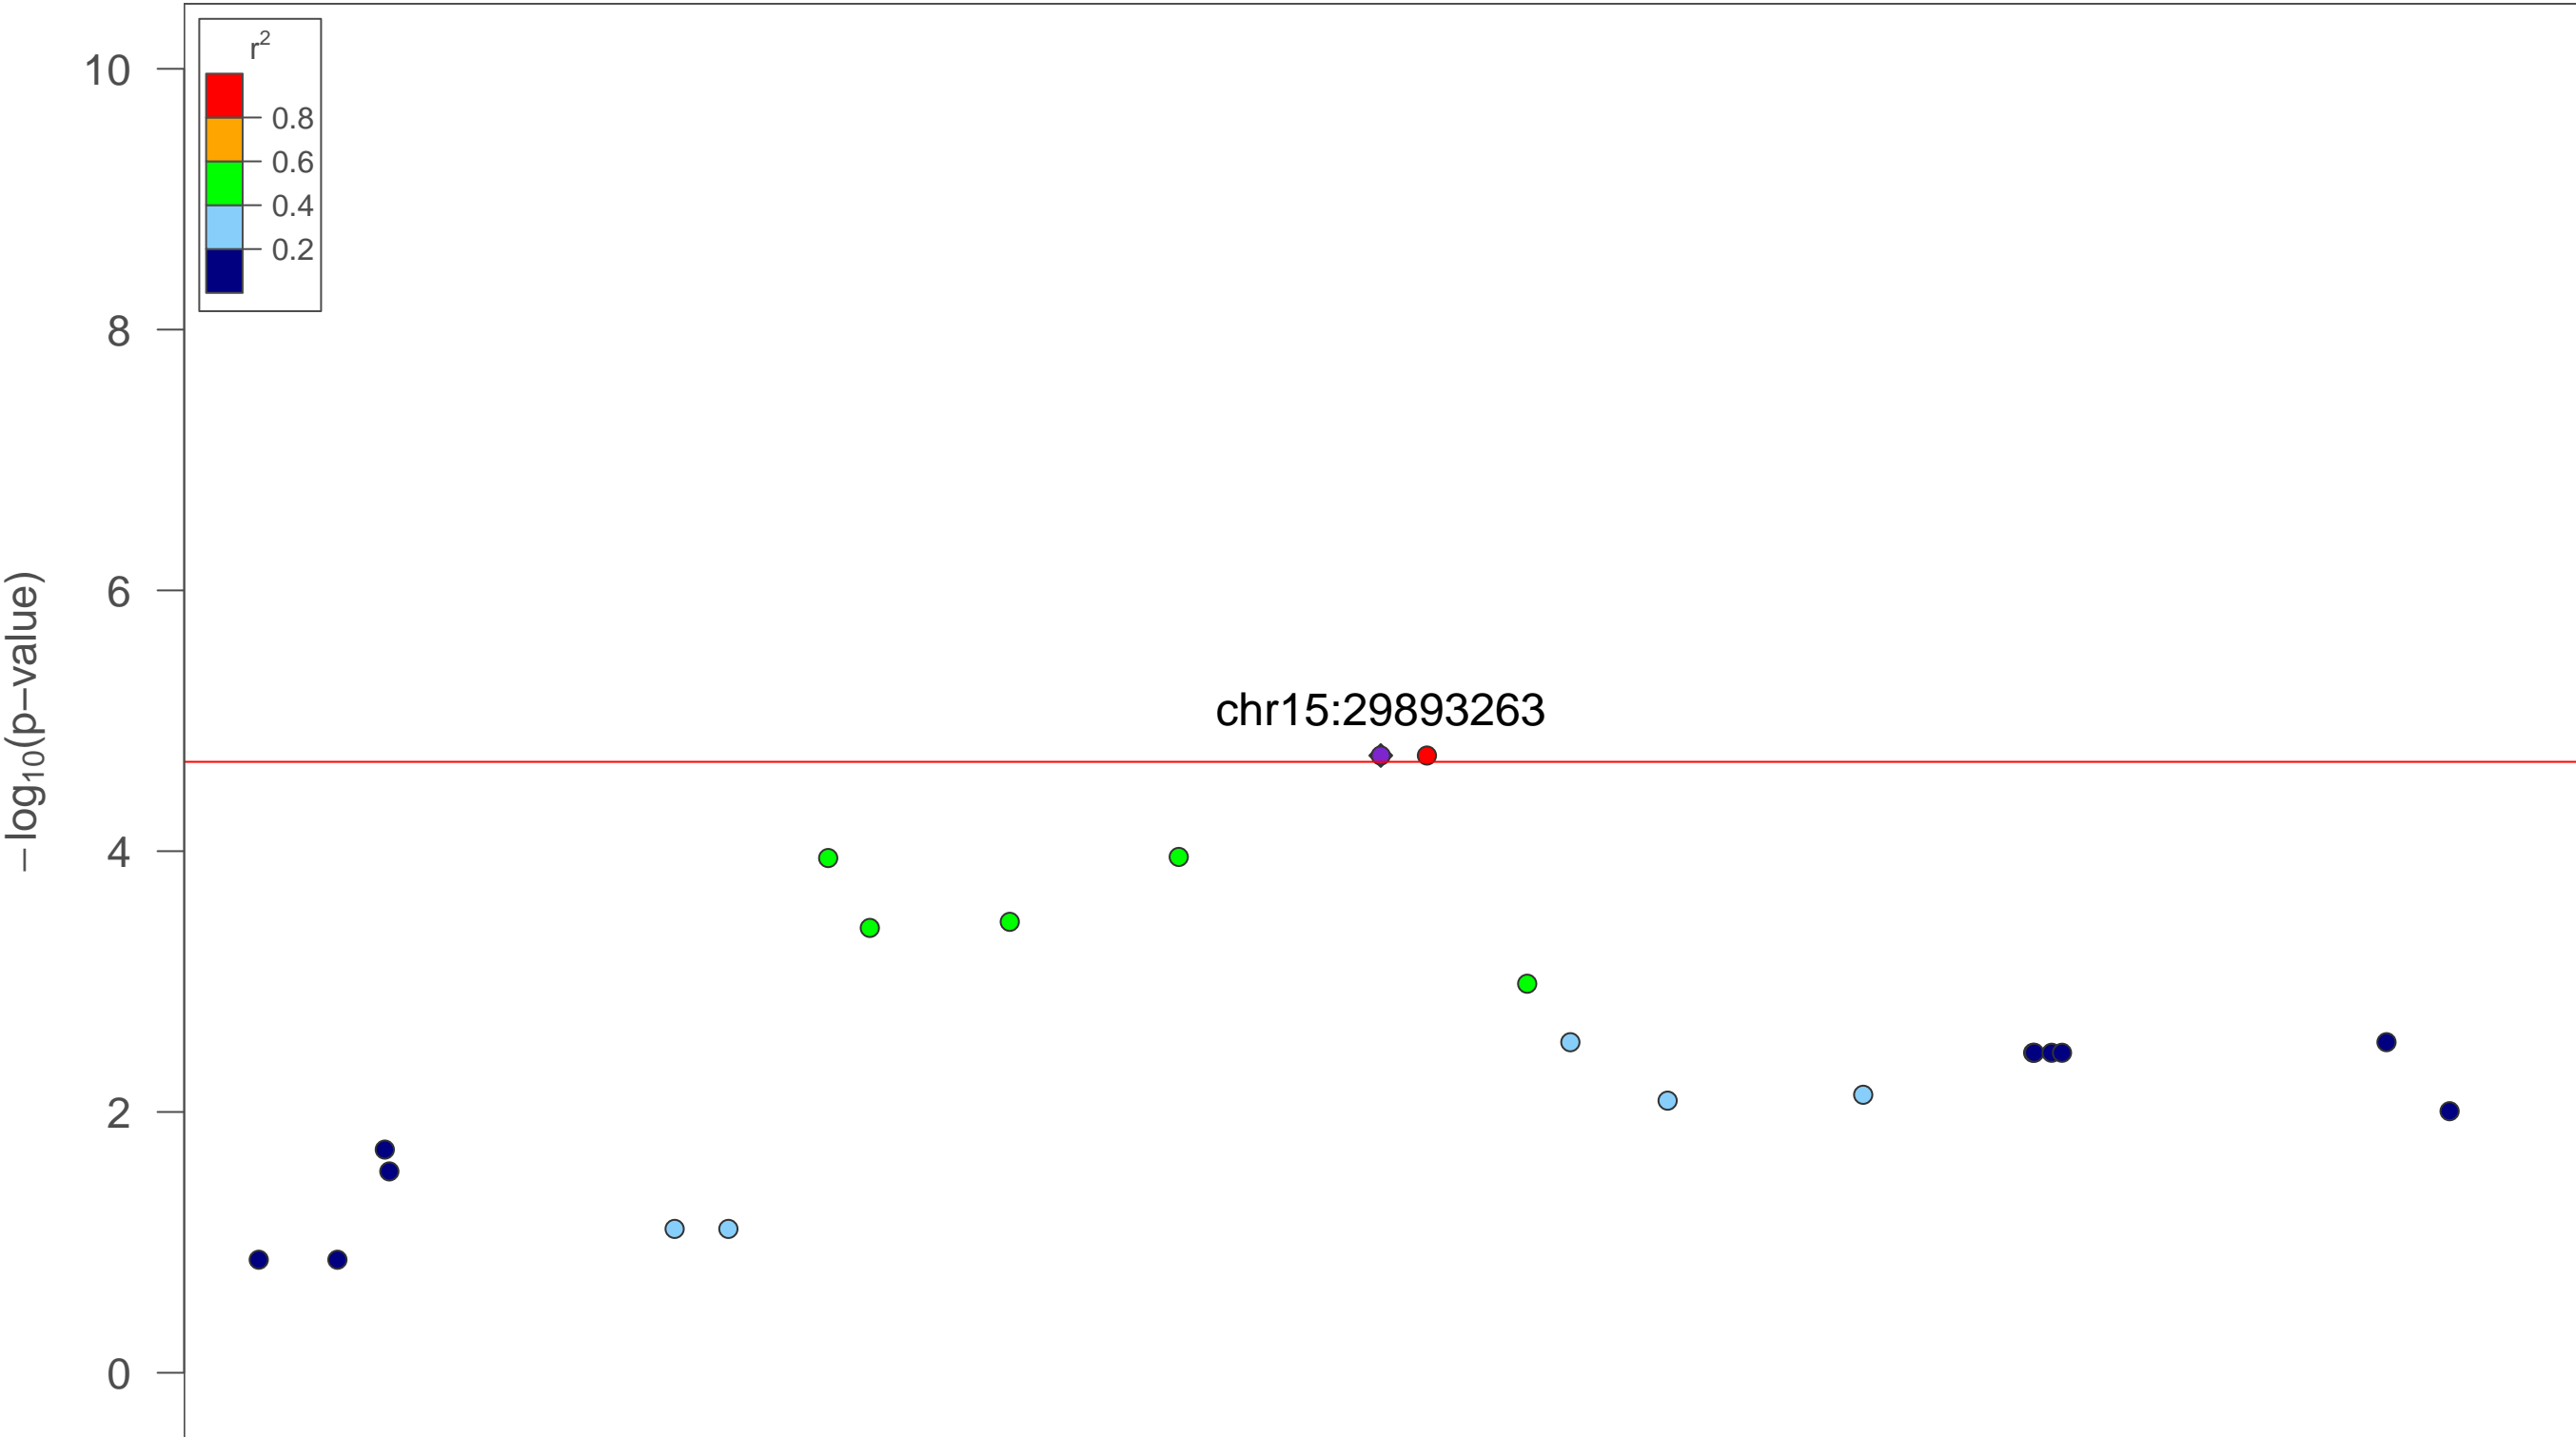

Credible Set

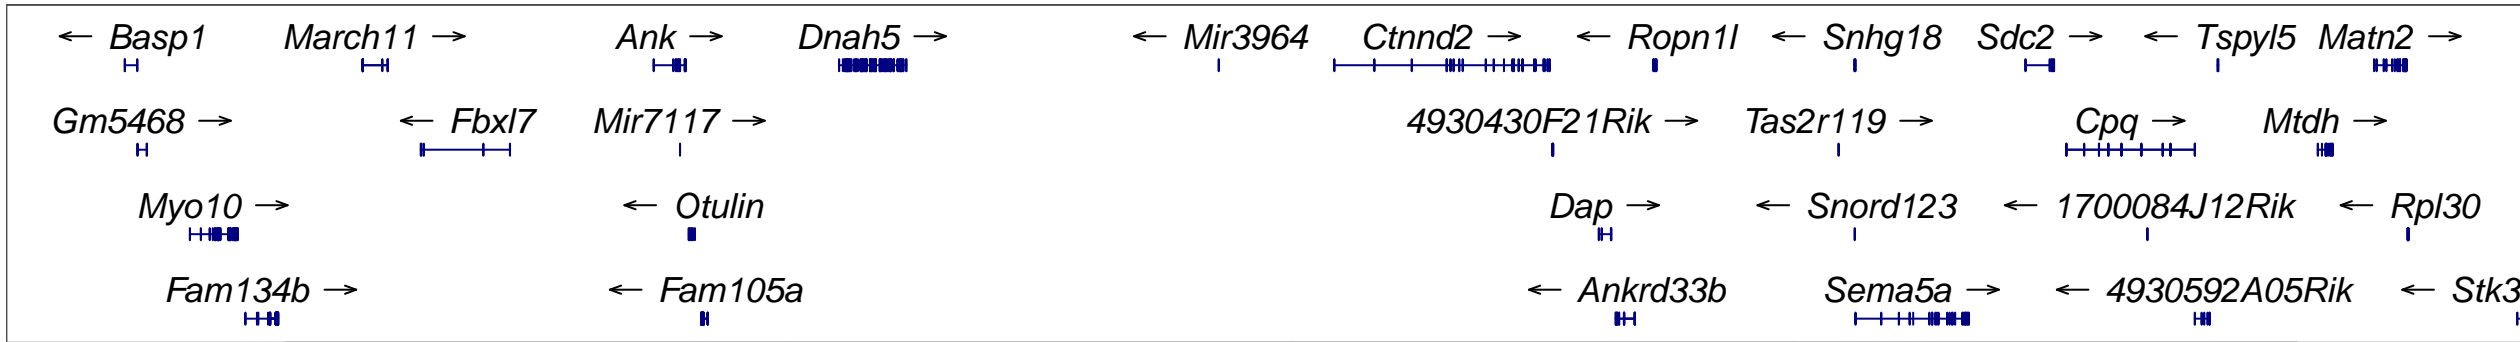

15 genes  
omitted

Position on chr15 (Mb)

date: Thu Oct 25 16:52:20 2018

build: F34Array

display range: chr15:24893263–34893263 [24893263–34893263]

hilite range: 0 – 0 [ 0 – 0 ]

reference SNP: chr15:29893263

number of SNPs plotted: 23

min P-value: 1.85E–5 [chr15:29893263]

max P-value: 1.36E–1 [chr15:25205426]

omitted Genes: Mir7212, Zfp622, Trio

omitted Genes: March6, Cmb1, Cct5

omitted Genes: Fam173b, Laptm4b, 9430069I07Rik

omitted Genes: Erich5, Rida, Pop1

omitted Genes: Nipal2, 4930413F20Rik, Kcns2



Fine-mapping Regions

| snp            | chr | pos (Mb) | pp  | group        | color  |
|----------------|-----|----------|-----|--------------|--------|
| chr15:29893263 | 15  | 29.89326 | 0.5 | Credible Set | purple |
| chr15:30086139 | 15  | 30.08614 | 0.5 | Credible Set | purple |

F34 Array, routine CBC red blood cell distribution width

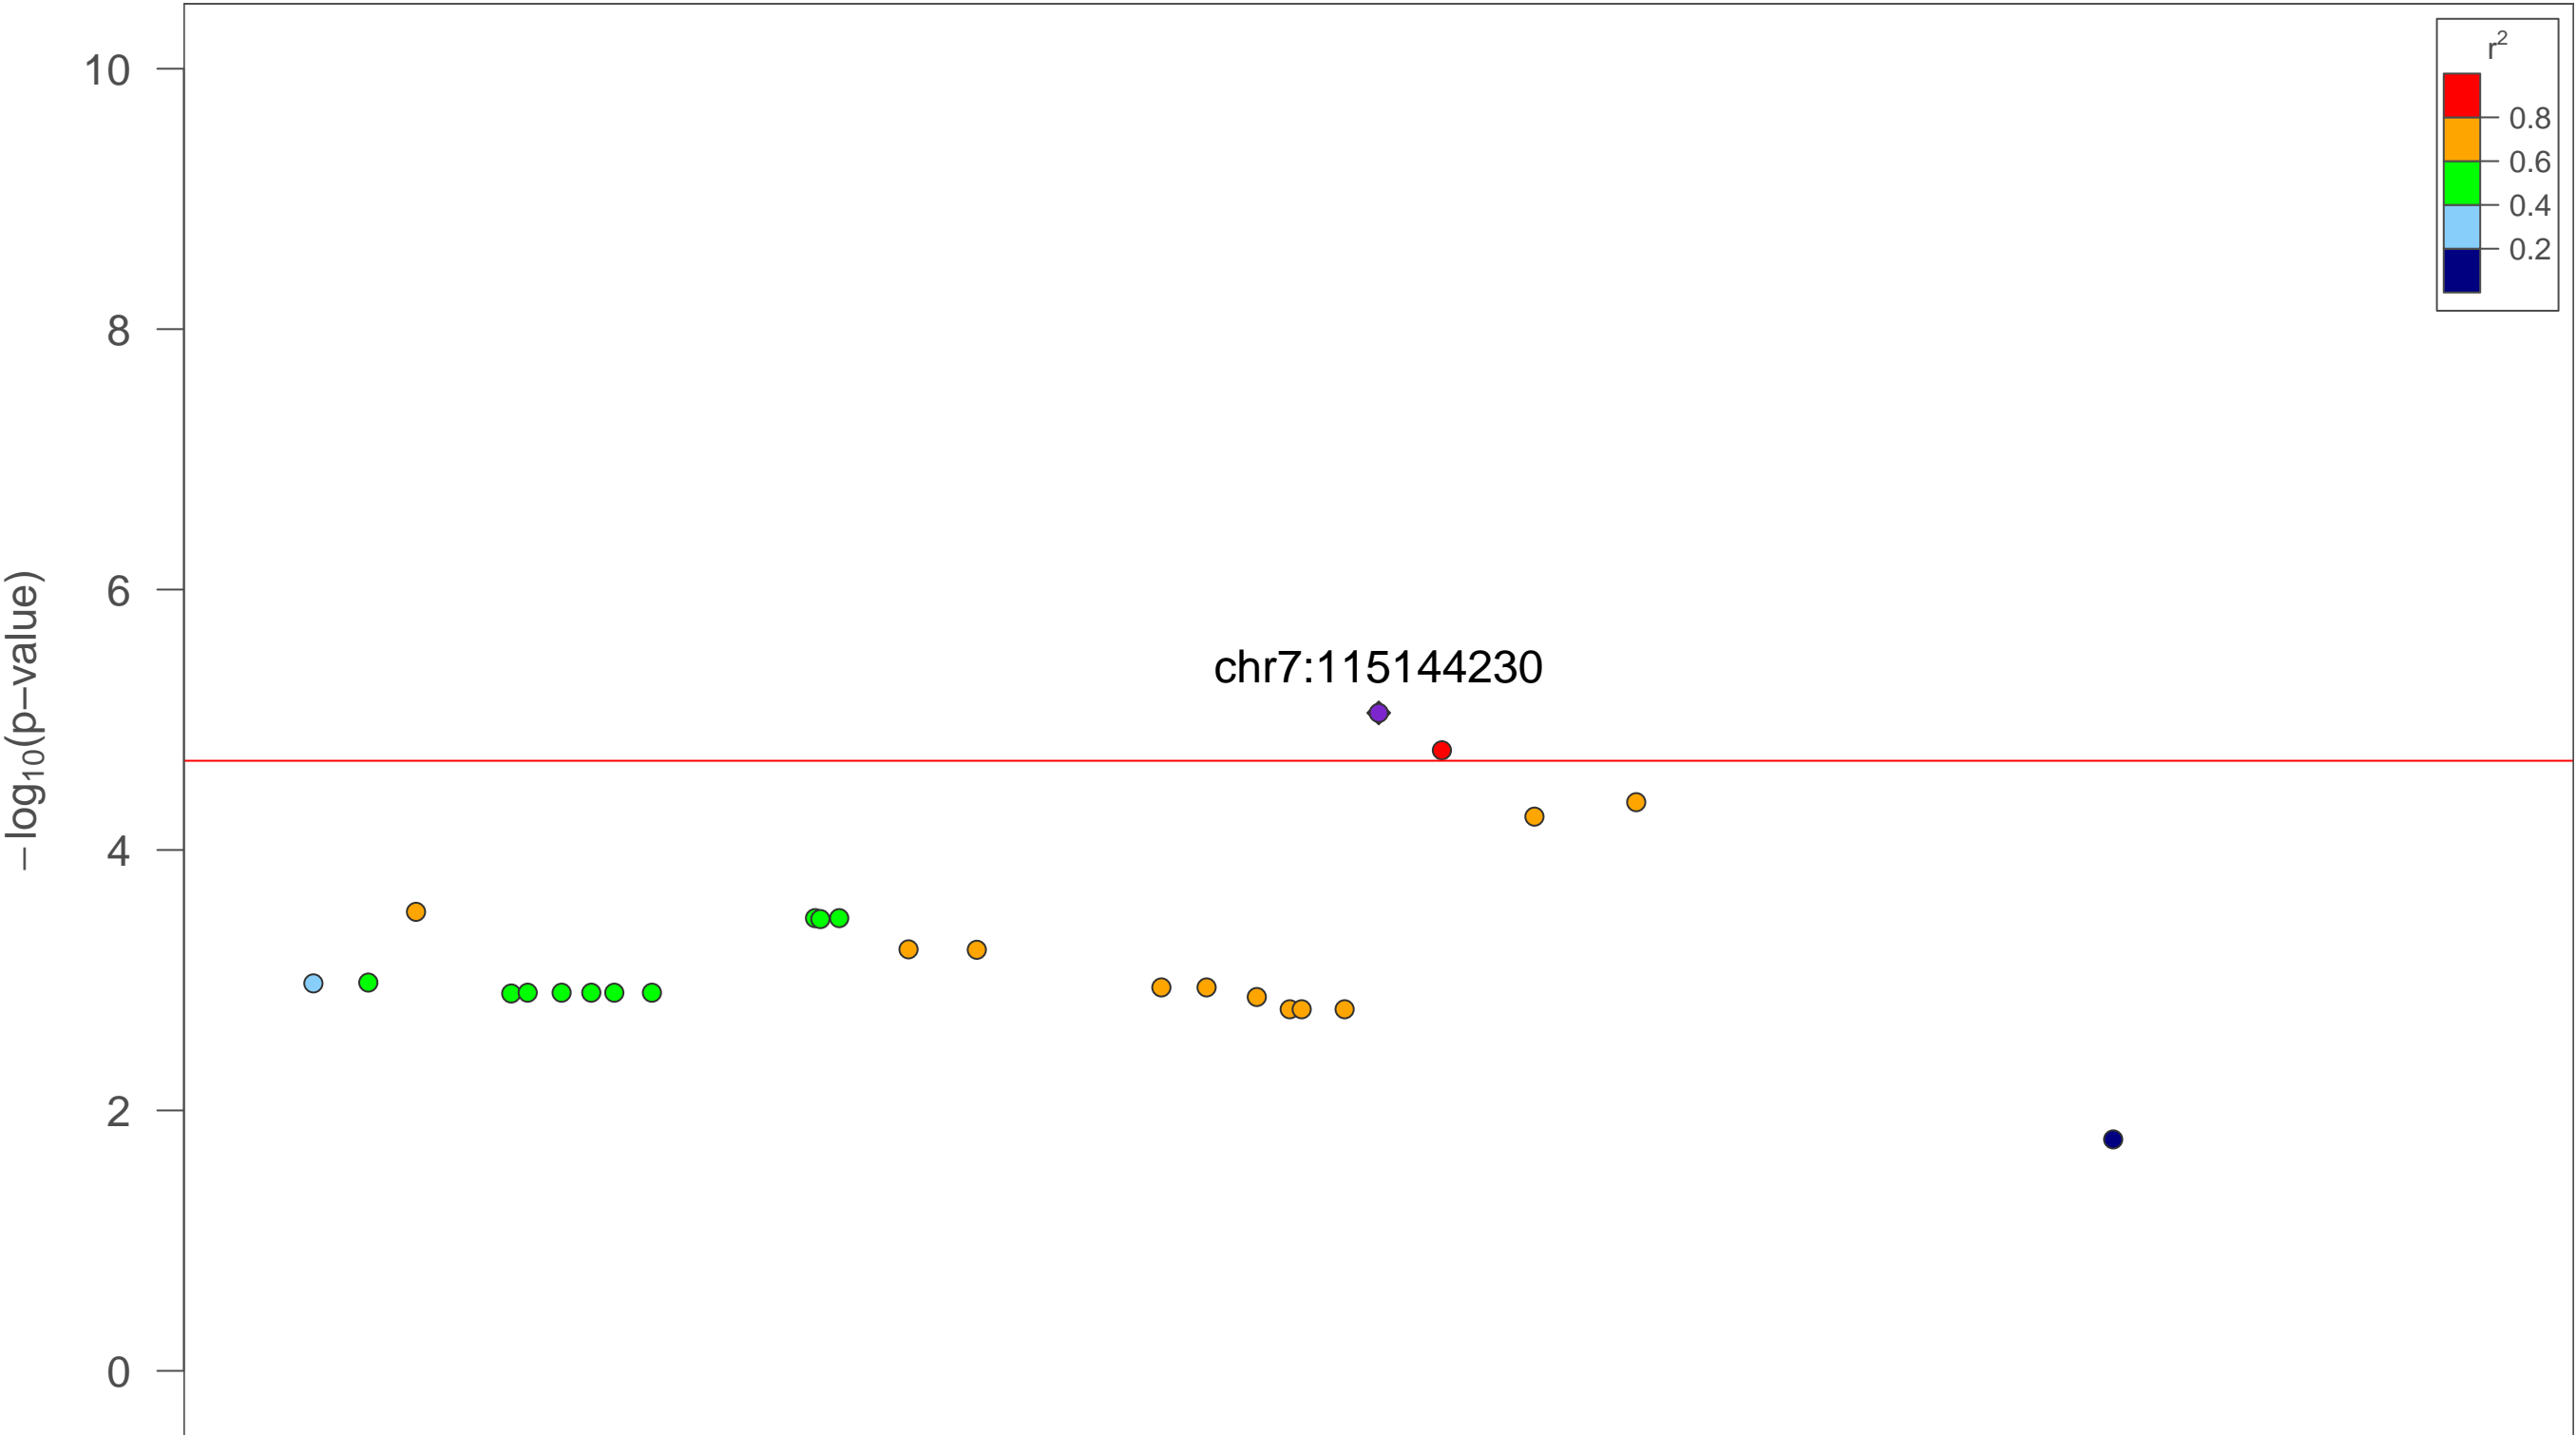

Credible Set

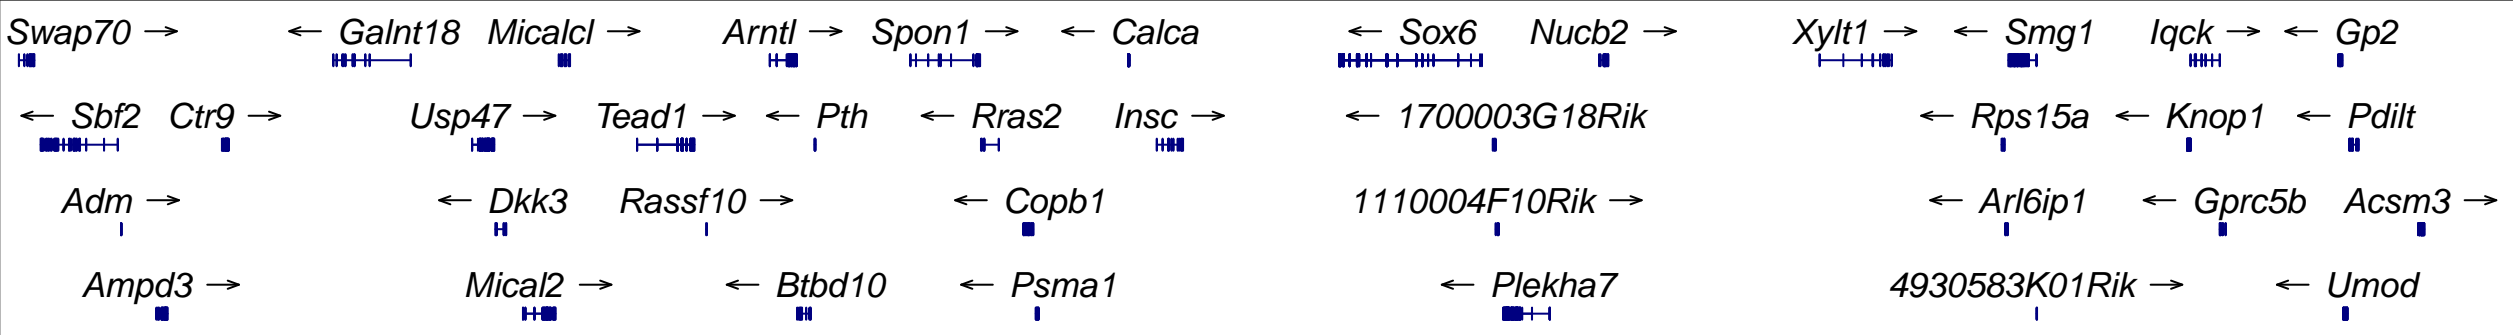

38 genes  
omitted

date: Thu Oct 25 16:53:02 2018  
build: F34Array  
display range: chr7:110144230–120144230 [110144230–120144230]  
hilite range: 0 – 0 [ 0 – 0 ]  
reference SNP: chr7:115144230  
number of SNPs plotted: 26  
min P-value: 8.86E–6 [chr7:115144230]  
max P-value: 1.67E–2 [chr7:118217303]  
omitted Genes: Rnf141, Lyve1, Mrvi1  
omitted Genes: Gm16336, Eif4g2, 1700012D14Rik  
omitted Genes: Parva, 4930543E12Rik, Far1  
omitted Genes: Far1os, 4933406I18Rik, Pde3b  
omitted Genes: Cyp2r1, Calcb, A730082K24Rik  
omitted Genes: Rps13, Snord14a, Pik3c2a  
omitted Genes: Syt17, Itpripl2, Coq7  
omitted Genes: Tmc7, Tmc5, Gde1  
omitted Genes: Ccp110, 9030624J02Rik, Gpr139  
omitted Genes: Acsm5, Acsm2, Acsm1  
omitted Genes: Acsm4, Thumpd1, Eri2  
omitted Genes: 2610020H08Rik, Dcun1d3, Lymr1  
omitted Genes: Tmem159, Zp2

Fine-mapping Regions

| snp            | chr | pos (Mb) | pp        | group        | color  |
|----------------|-----|----------|-----------|--------------|--------|
| chr7:115144230 | 7   | 115.1442 | 0.6525872 | Credible Set | purple |
| chr7:115408492 | 7   | 115.4085 | 0.3474128 | Credible Set | purple |

F34 Array, routine CBC red blood cell distribution width

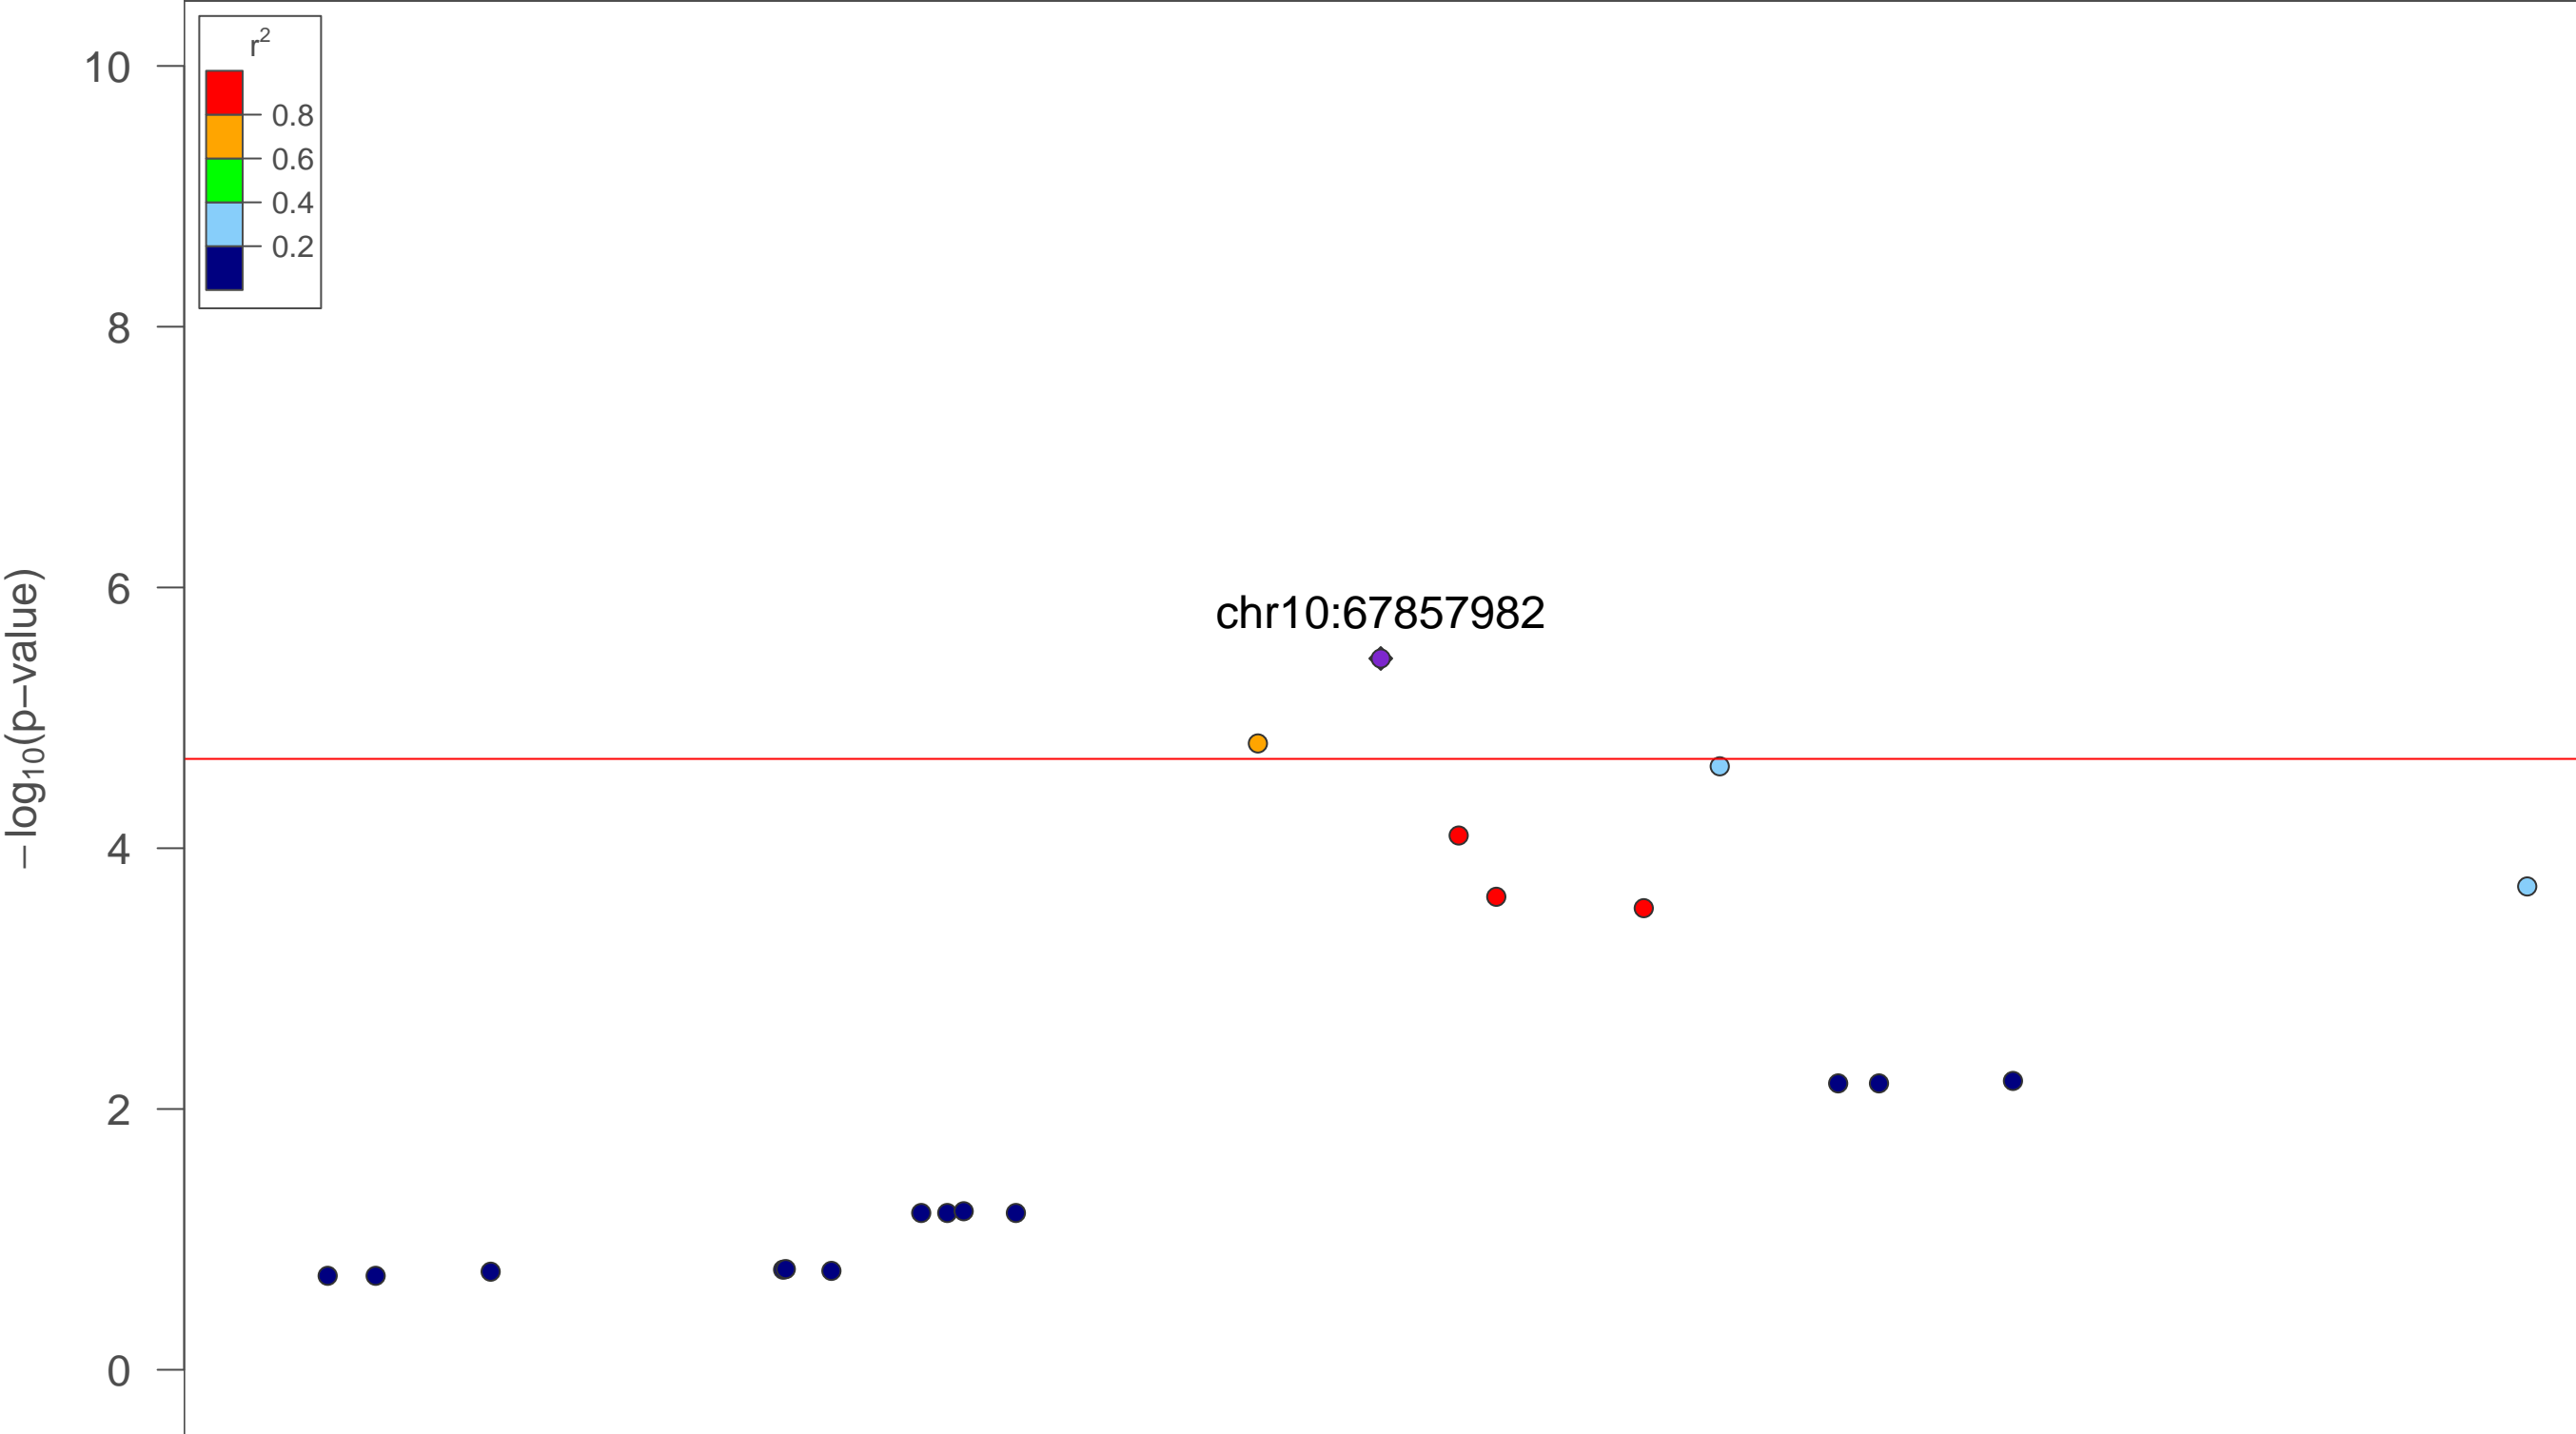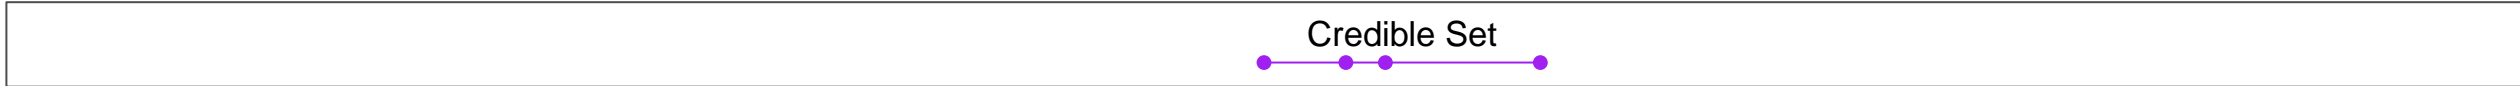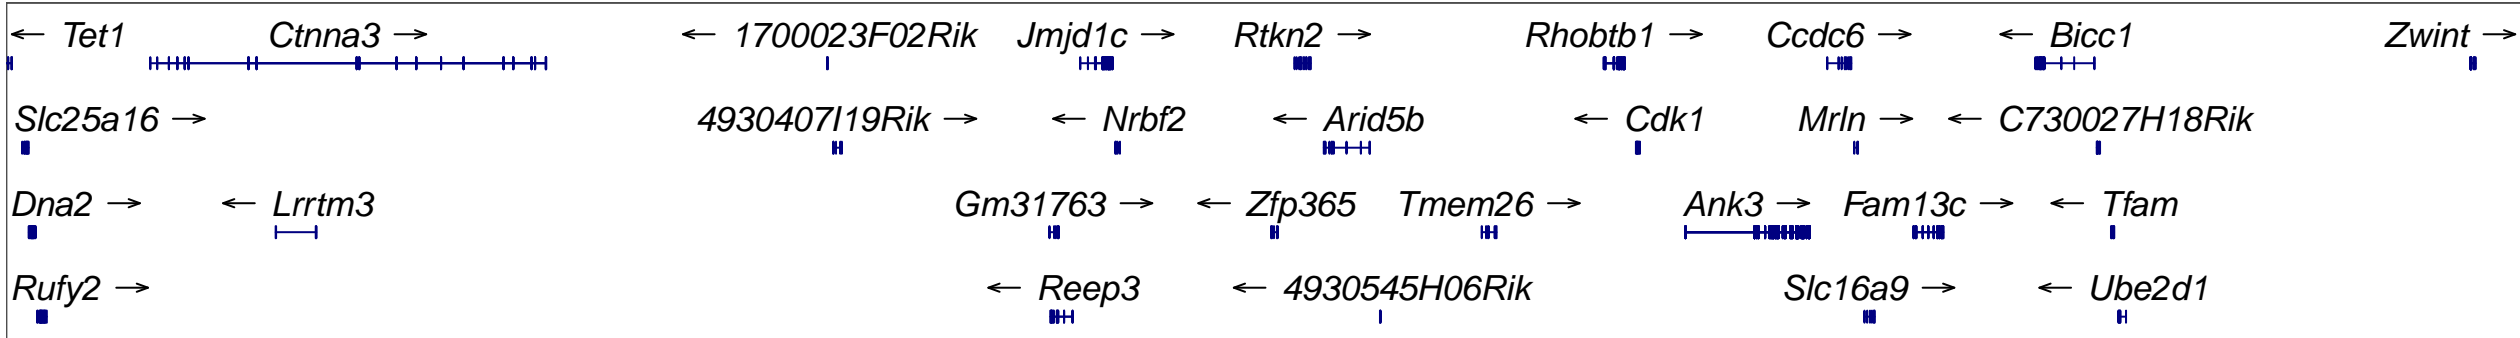

17 genes  
omitted

Position on chr10 (Mb)

date: Thu Oct 25 16:52:55 2018  
build: F34Array  
display range: chr10:62857982–72857982 [62857982–72857982]  
hilite range: 0 – 0 [ 0 – 0 ]  
reference SNP: chr10:67857982  
number of SNPs plotted: 21  
min P-value: 3.5E–6 [chr10:67857982]  
max P-value: 1.9E–1 [chr10:63458094]  
omitted Genes: Hnrnph3, Pbd2, Pbd1  
omitted Genes: Atoh7, Mypn, Herc4  
omitted Genes: Sirt1, Dnajc12, Egr2  
omitted Genes: Ado, 1700040L02Rik, Phyhipl  
omitted Genes: D630013N20Rik, 1700113B09Rik, Cisd1  
omitted Genes: Ipmk, 1700049L16Rik

Fine-mapping Regions

| snp            | chr | pos (Mb) | pp         | group        | color  |
|----------------|-----|----------|------------|--------------|--------|
| chr10:67857982 | 10  | 67.85798 | 0.92212713 | Credible Set | purple |
| chr10:68183490 | 10  | 68.18349 | 0.04691722 | Credible Set | purple |
| chr10:68340621 | 10  | 68.34062 | 0.01693441 | Credible Set | purple |
| chr10:68956755 | 10  | 68.95676 | 0.01402124 | Credible Set | purple |

# F34 Array, routine CBC hemoglobin distribution width

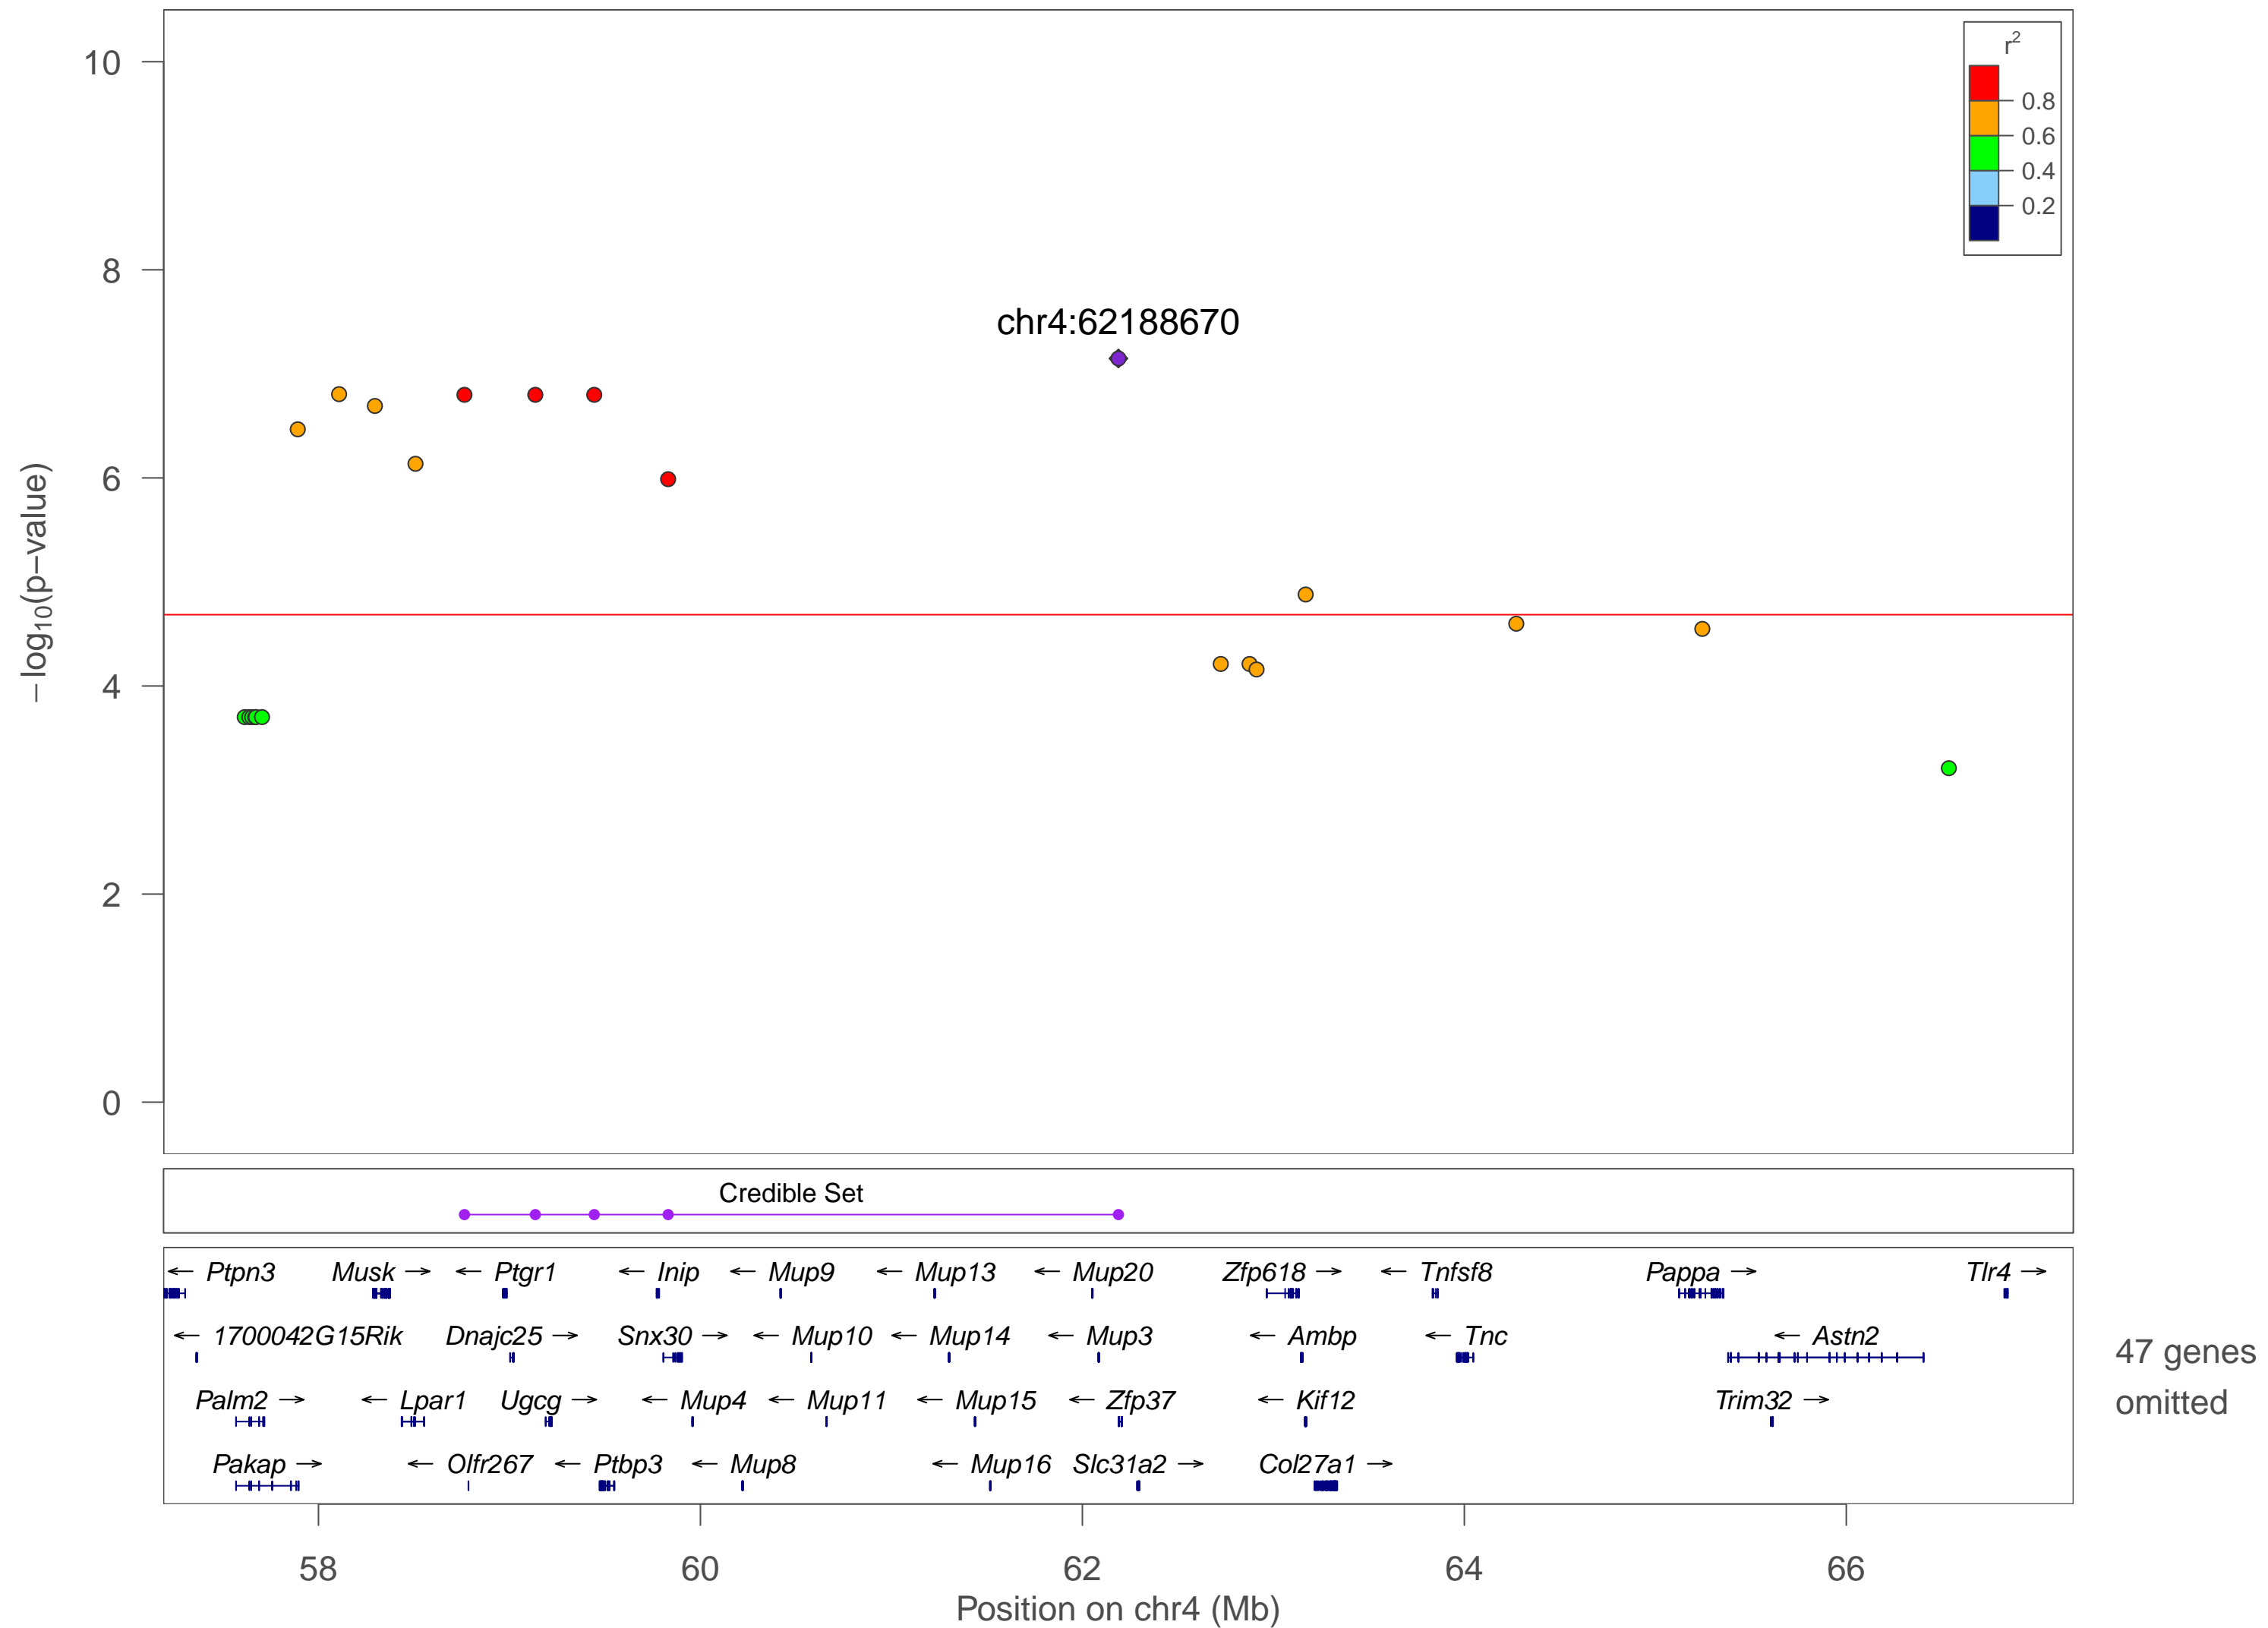



date: Thu Oct 25 16:45:10 2018  
build: F34Array  
display range: chr4:57188670–67188670 [57188670–67188670]  
hilite range: 0 – 0 [ 0 – 0 ]  
reference SNP: chr4:62188670  
number of SNPs plotted: 23  
min P-value: 7.11E–8 [chr4:62188670]  
max P-value: 6.17E–4 [chr4:66536974]  
omitted Genes: Akap2, D630039A03Rik, Txn1  
omitted Genes: Txndc8, Slep1, Mir3095  
omitted Genes: AI314180, Zkscan16, Gng10  
omitted Genes: Gm12596, Susd1, Hsd12  
omitted Genes: E130308A19Rik, Slc46a2, Mup6  
omitted Genes: Mup7, Mup2, Mup1  
omitted Genes: Mup12, Mup17, Mup18  
omitted Genes: Mup19, Mup5, Mup21  
omitted Genes: Fkbp15, Slc31a1, Cdc26  
omitted Genes: Prpf4, Rnf183, Wdr31  
omitted Genes: Bspry, Hdhd3, Alad  
omitted Genes: Pole3, 4933430I17Rik, Rgs3  
omitted Genes: Mir455, Orm1, Orm3  
omitted Genes: Orm2, Akna, Whrn  
omitted Genes: Atp6v1g1, 6330416G13Rik, Gm11213  
omitted Genes: 1700018C11Rik, Tnfsf15

Fine-mapping Regions

| snp           | chr | pos (Mb) | pp         | group        | color  |
|---------------|-----|----------|------------|--------------|--------|
| chr4:58764292 | 4   | 58.76429 | 0.18717006 | Credible Set | purple |
| chr4:59135384 | 4   | 59.13538 | 0.18717006 | Credible Set | purple |
| chr4:59443996 | 4   | 59.44400 | 0.18717006 | Credible Set | purple |
| chr4:59830858 | 4   | 59.83086 | 0.03088785 | Credible Set | purple |
| chr4:62188670 | 4   | 62.18867 | 0.40760197 | Credible Set | purple |

# F34 Array, routine CBC hemoglobin distribution width

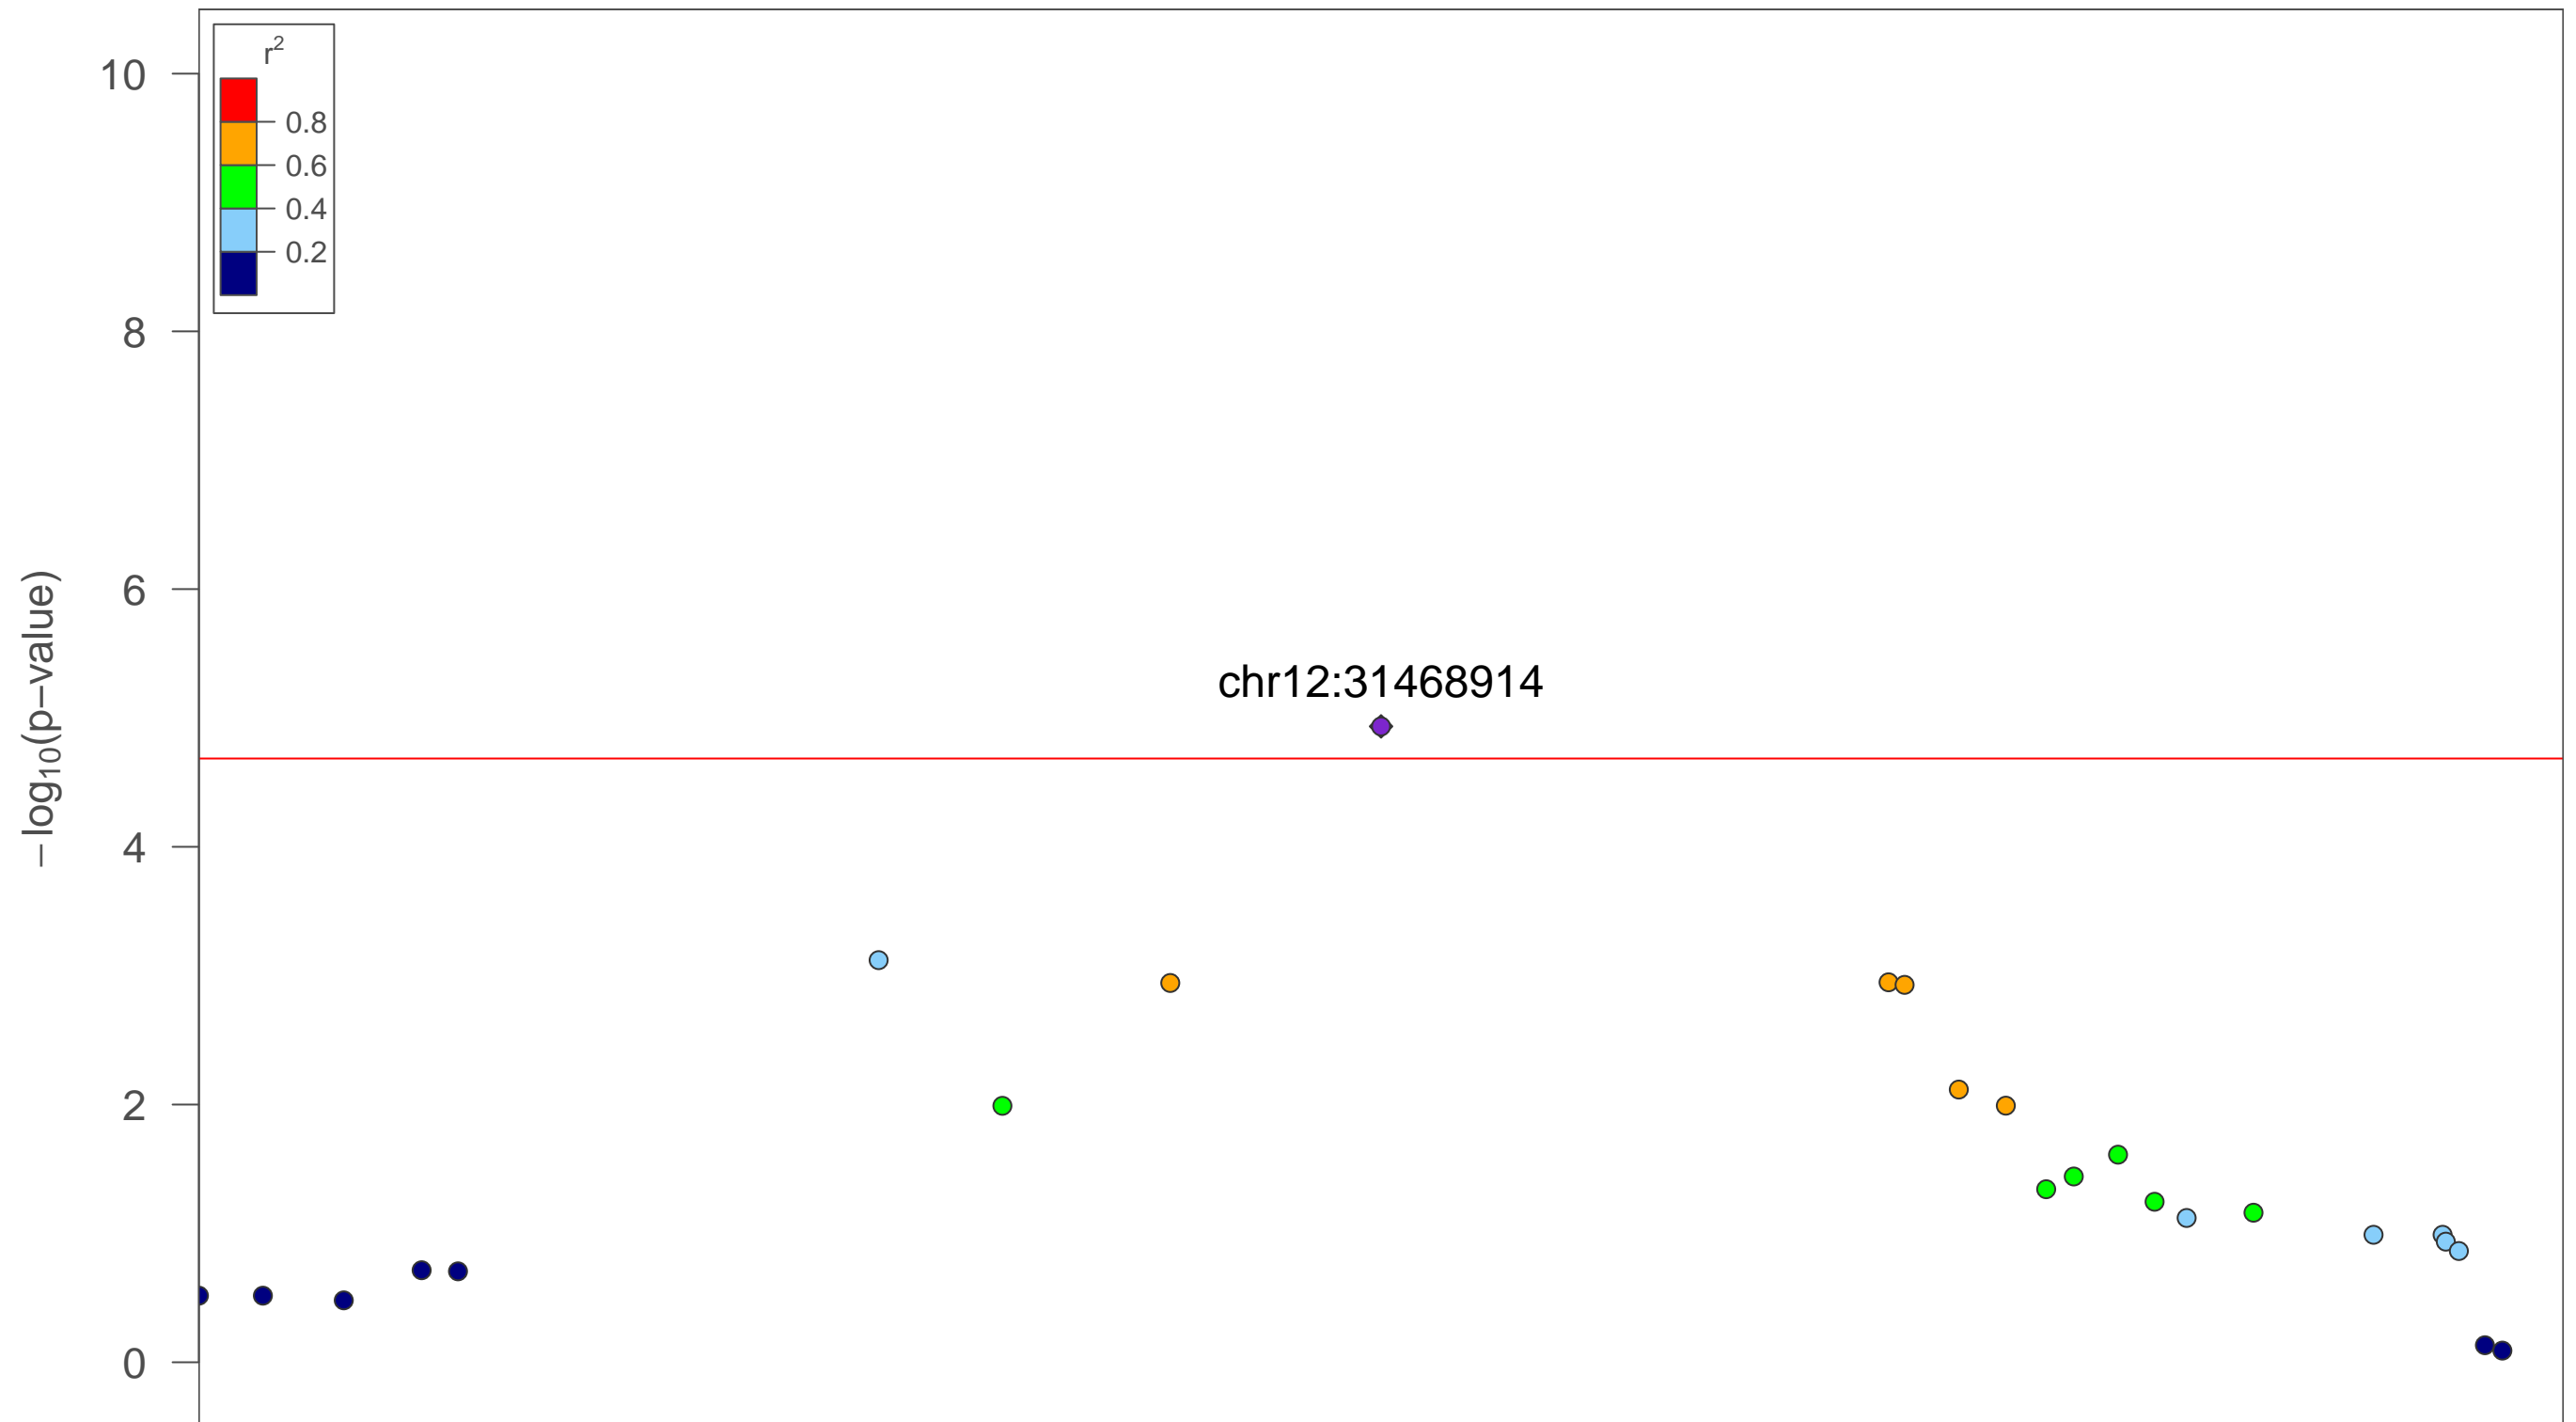

Credible Set

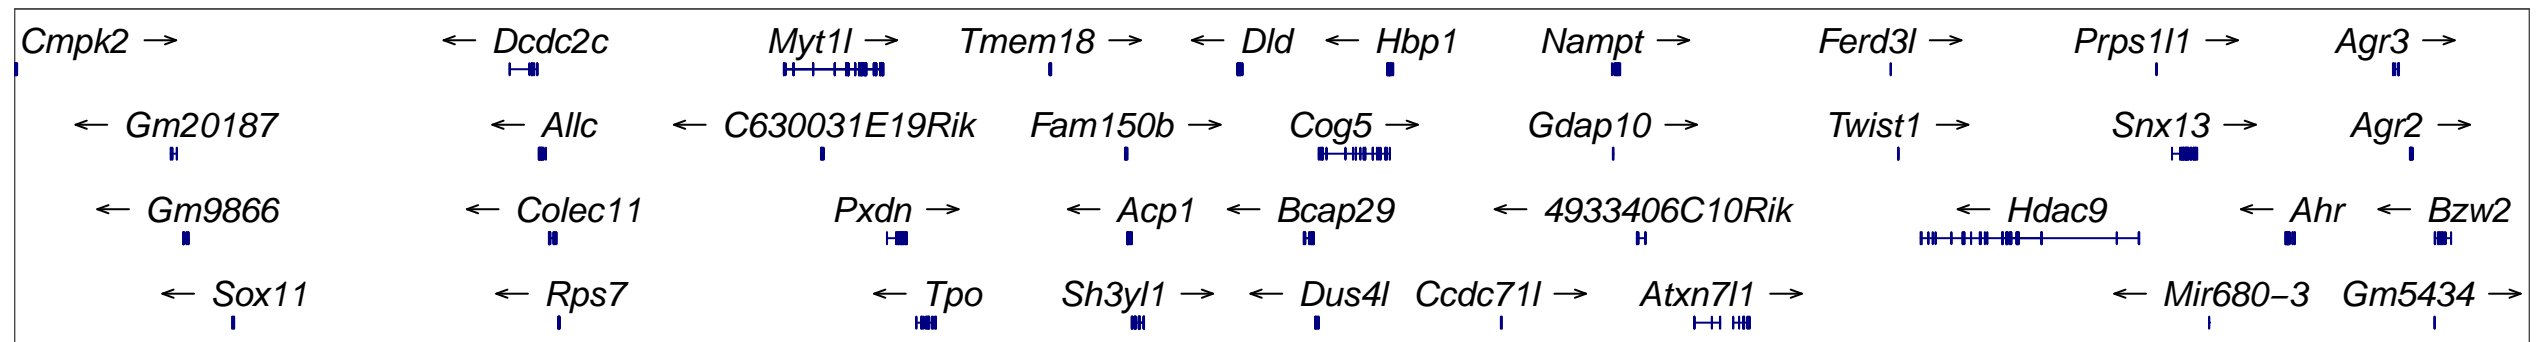

28 genes  
omitted

28

30

32

34

36

Position on chr12 (Mb)

date: Thu Oct 25 16:44:56 2018  
build: F34Array  
display range: chr12:26468914–36468914 [26468914–36468914]  
hilite range: 0 – 0 [ 0 – 0 ]  
reference SNP: chr12:31468914  
number of SNPs plotted: 26  
min P-value: 1.16E–5 [chr12:31468914]  
max P-value: 8.11E–1 [chr12:36210830]  
omitted Genes: Rnaseh1, Adi1, Mir6937  
omitted Genes: Trappc12, Tssc1, Sntg2  
omitted Genes: 2310016D03Rik, Fam110c, 6030469F06Rik  
omitted Genes: Lamb1, Slc26a3, Cbll1  
omitted Genes: Slc26a4, Gpr22, Prkar2b  
omitted Genes: Pik3cg, Sypl, Cdhr3  
omitted Genes: F730043M19Rik, Atxn7l1os2, Efcab10  
omitted Genes: Twistnb, 9130015A21Rik, Tspan13  
omitted Genes: Ankmy2, Lrrc72, Sostdc1  
omitted Genes: lspd

Fine-mapping Regions

| snp            | chr | pos (Mb) | pp | group        | color  |
|----------------|-----|----------|----|--------------|--------|
| chr12:31468914 | 12  | 31.46891 | 1  | Credible Set | purple |

# F34 Array, routine CBC hemoglobin distribution width

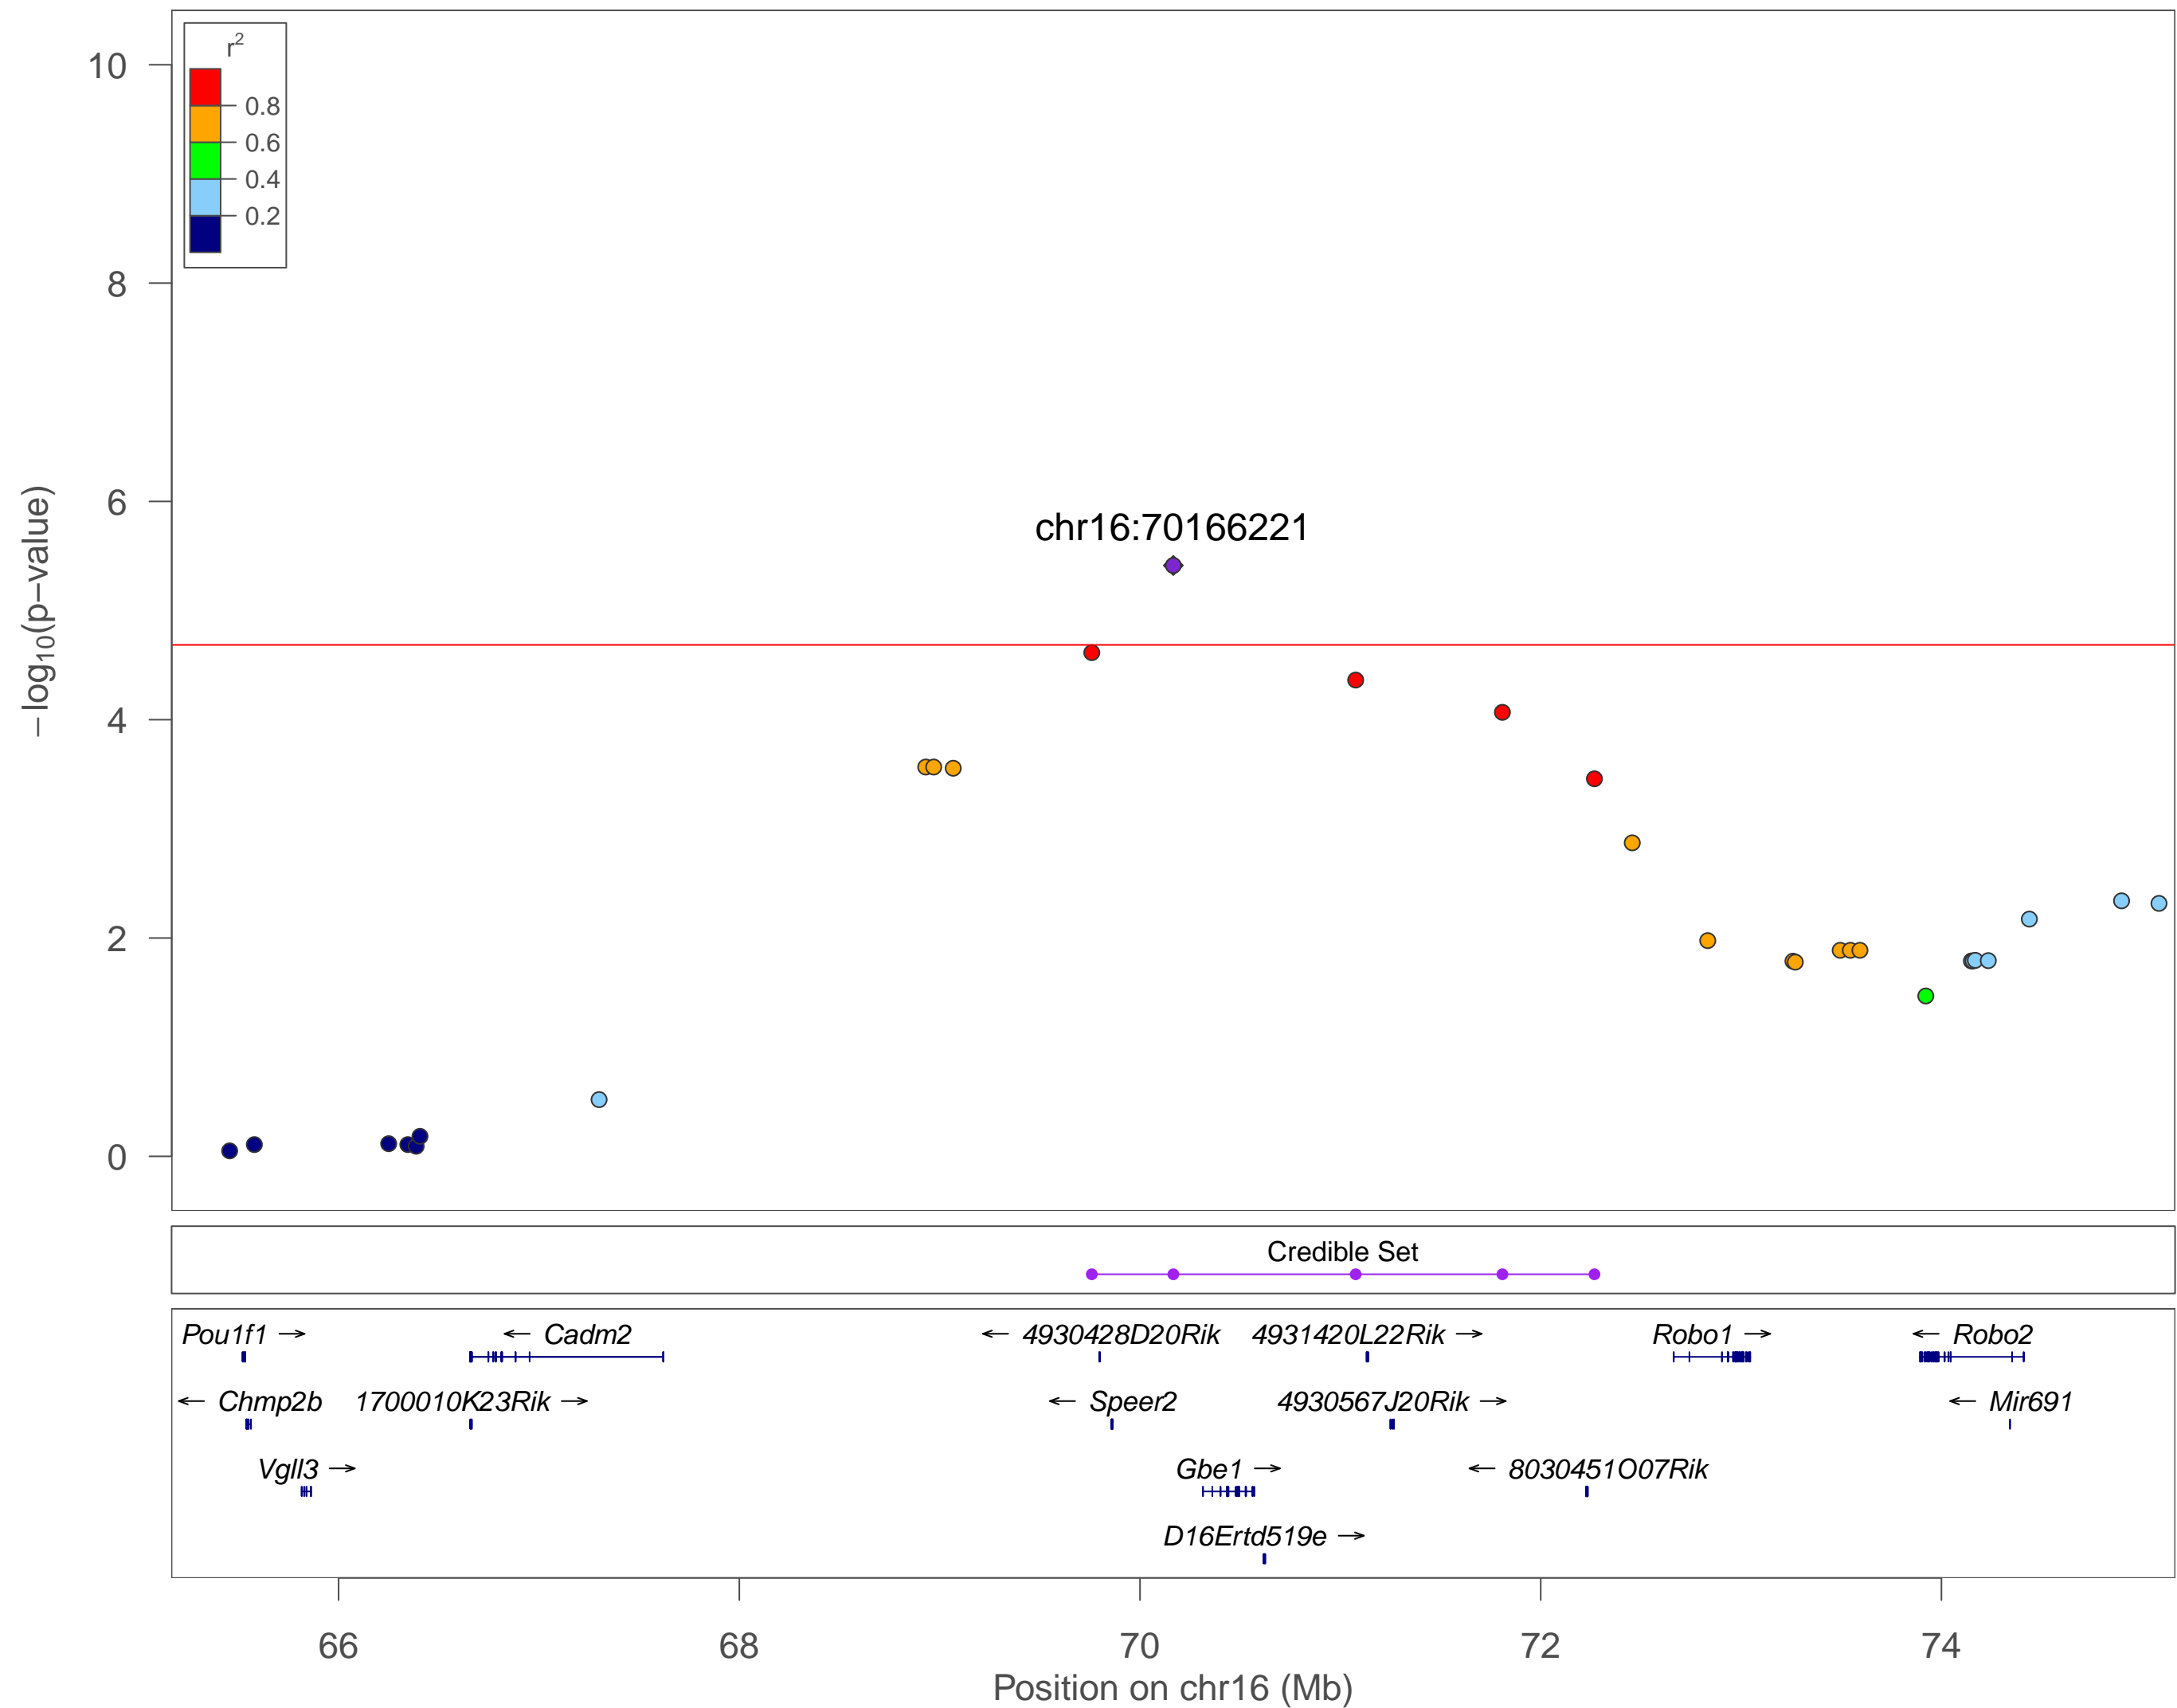

date: Thu Oct 25 16:45:02 2018

build: F34Array

display range: chr16:65166221–75166221 [65166221–75166221]

hilite range: 0 – 0 [ 0 – 0 ]

reference SNP: chr16:70166221

number of SNPs plotted: 31

min P-value: 3.86E–6 [chr16:70166221]

max P-value: 8.91E–1 [chr16:65456201]

Fine-mapping Regions

| snp            | chr | pos (Mb) | pp         | group        | color  |
|----------------|-----|----------|------------|--------------|--------|
| chr16:69759143 | 16  | 69.75914 | 0.12904633 | Credible Set | purple |
| chr16:70166221 | 16  | 70.16622 | 0.74694638 | Credible Set | purple |
| chr16:71076501 | 16  | 71.07650 | 0.07445709 | Credible Set | purple |
| chr16:71808739 | 16  | 71.80874 | 0.03909493 | Credible Set | purple |
| chr16:72268105 | 16  | 72.26811 | 0.01045527 | Credible Set | purple |



F34 Array, routine CBC mean platelet volume

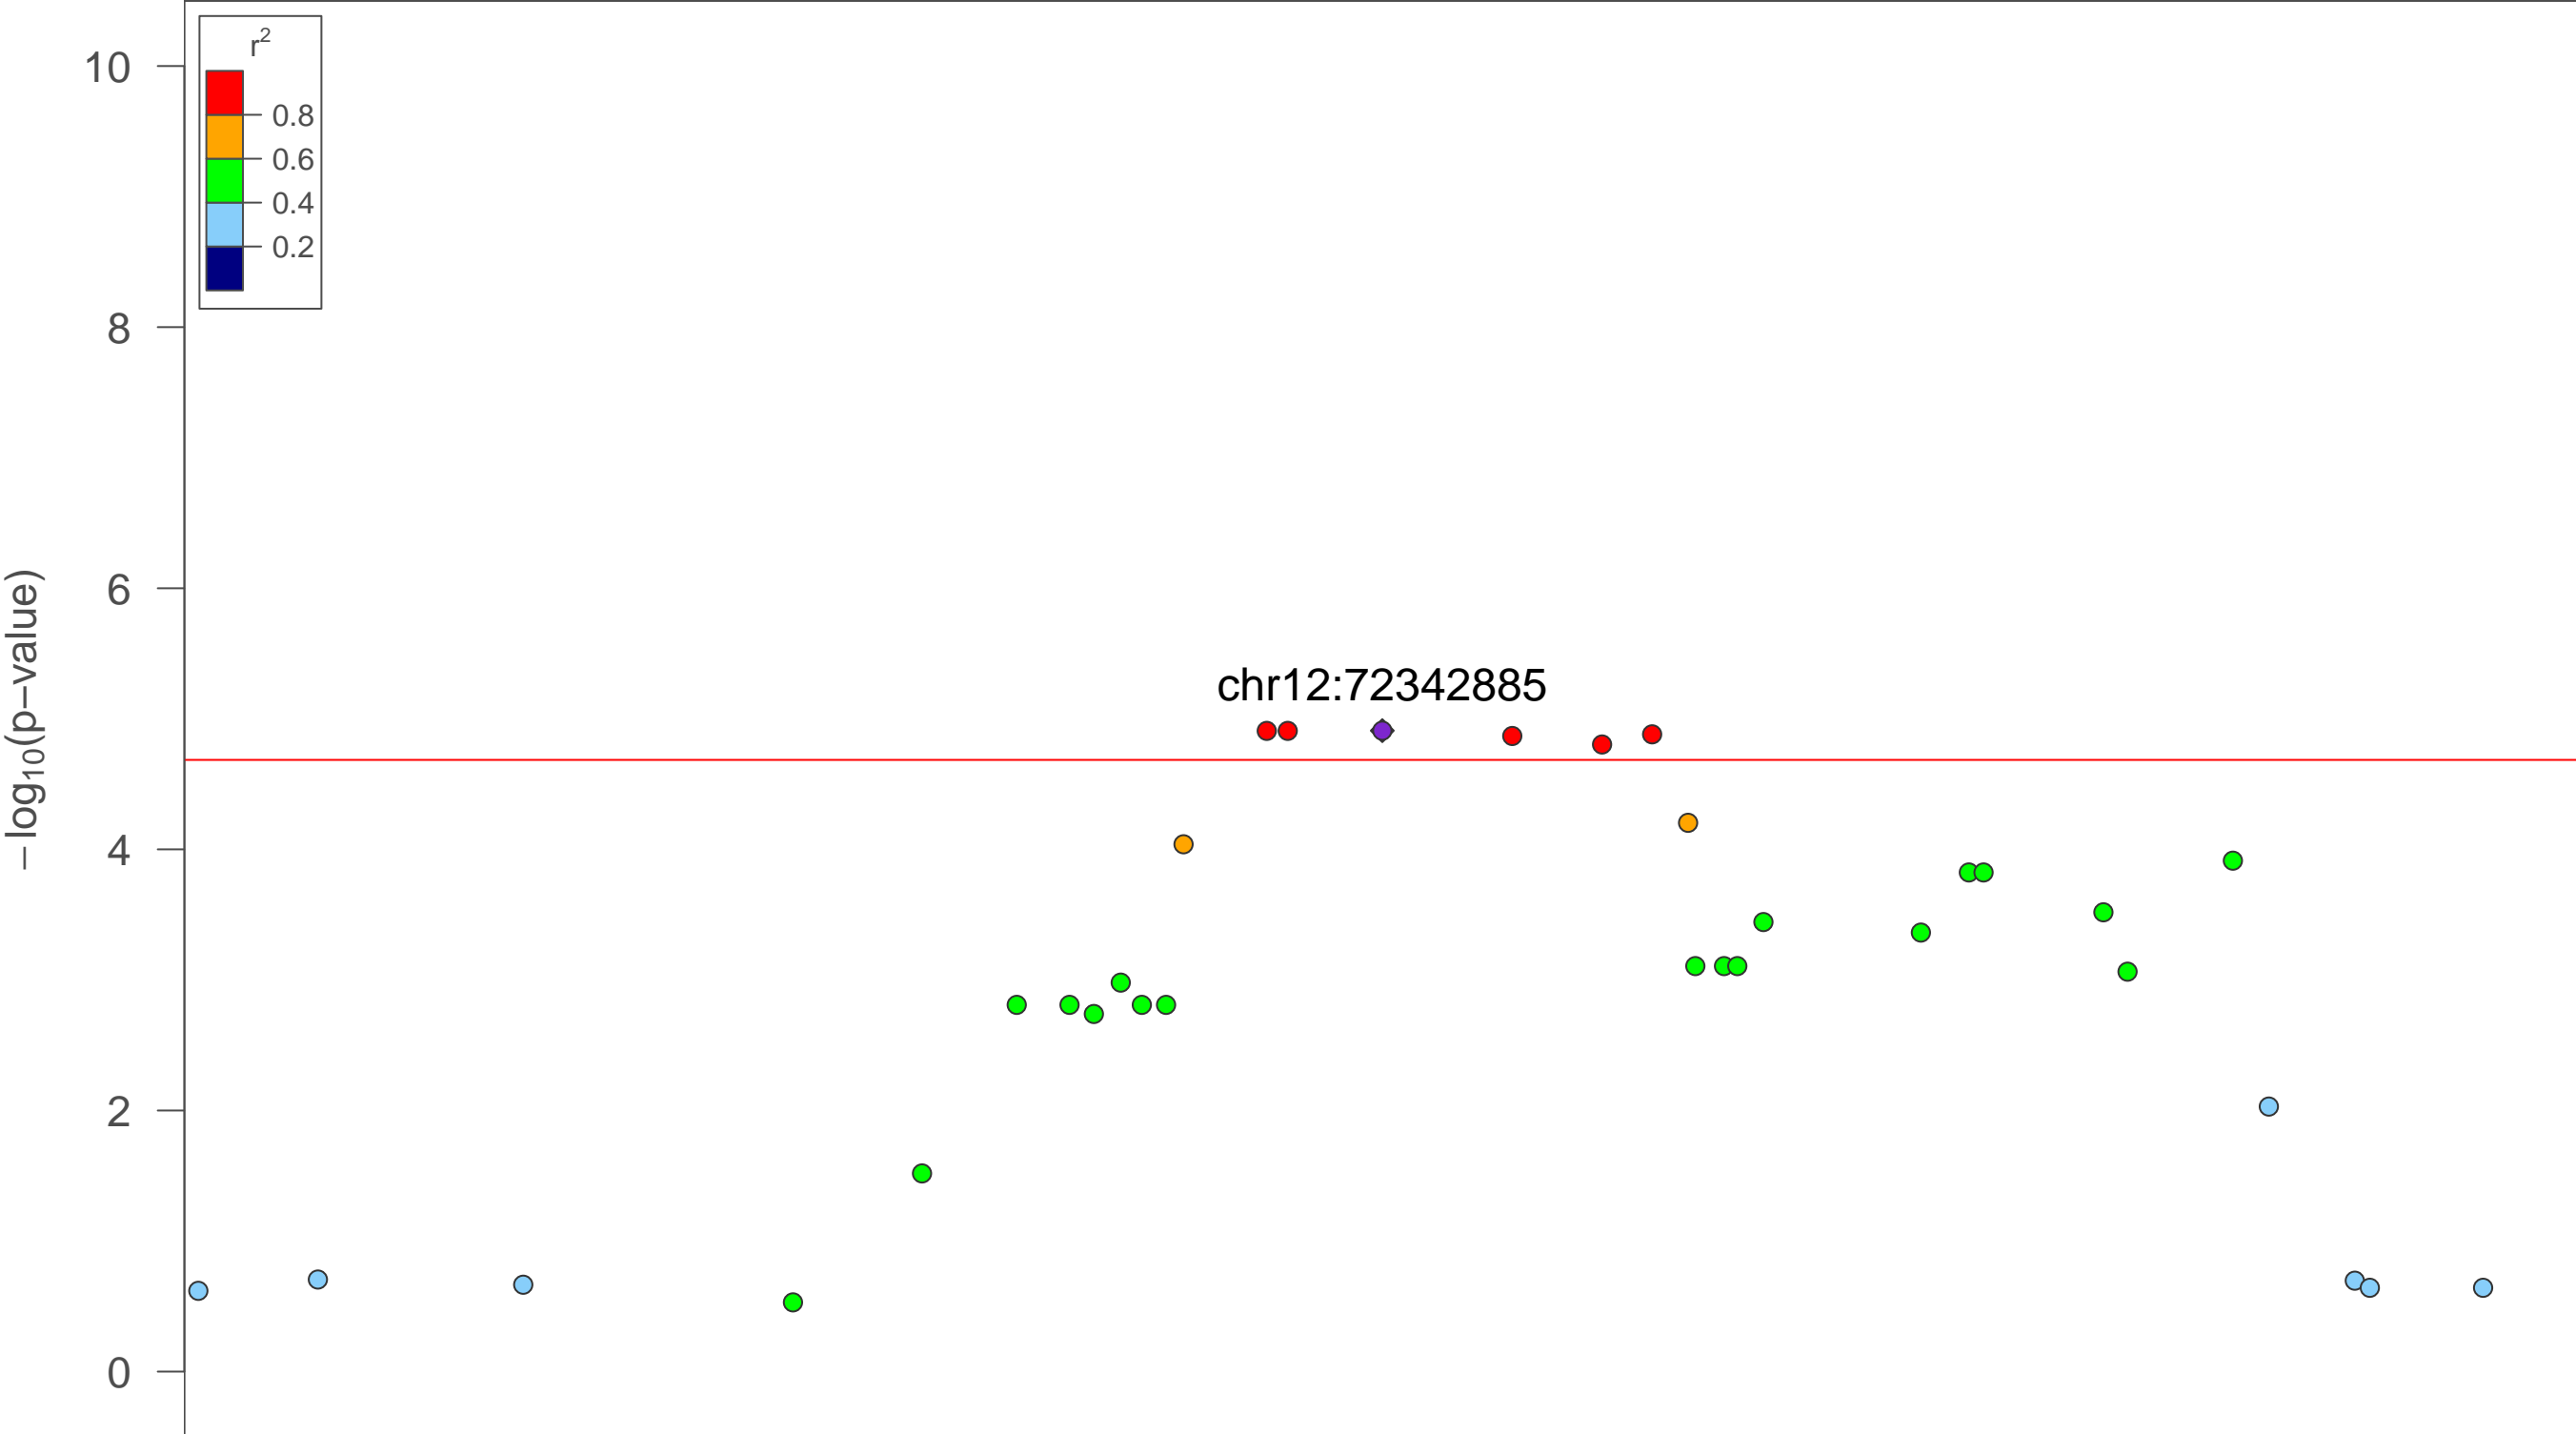

Credible Set

← *Rps29* → *Atf1* → *Frmd6* → *Daam1* → ← *Dhrs7* ← *Tmem30b* ← *Kcnh5* *Syne2* → ← *Sptb*  
← *Rn7s1* → ← *Gm3086* → ← *Actr10* → ← *Gpr135* *Six6* → ← *Prkch* → ← *Rhoj* → ← *Esr2* ← *Gpx2*  
← *Lrr1* → ← *Cdkl1* *Tmx1* → ← *Dact1* → ← *L3hypdh* ← *Six1* *Hif1a* → ← *Gphb5* ← *Tex21* *Fntb* →  
← *Rpl36al* ← *Sav1* *Pasma3* → ← *Jkamp* → ← *Six4* *Snappc1* → ← *Ppp2r5e* *Akap5* → ← *Max*

60 genes  
omitted

Position on chr12 (Mb)

date: Thu Oct 25 16:45:17 2018  
build: F34Array  
display range: chr12:67342885–77342885 [67342885–77342885]  
hilite range: 0 – 0 [ 0 – 0 ]  
reference SNP: chr12:72342885  
number of SNPs plotted: 34  
min P-value: 1.23E–5 [chr12:72342885]  
max P-value: 2.95E–1 [chr12:69883335]  
omitted Genes: Mgat2, Dnaaf2, 9330151L19Rik  
omitted Genes: Pole2, Klhdc1, Klhdc2  
omitted Genes: Nemf, Rn7s2, Arf6  
omitted Genes: 5830428M24Rik, Vcpkmt, Sos2  
omitted Genes: L2hgdh, Atp5s, Mir681  
omitted Genes: 4930512B01Rik, Map4k5, 4931403G20Rik  
omitted Genes: Nin, Abhd12b, Pygl  
omitted Genes: F730035M05Rik, Trim9, 3110056K07Rik  
omitted Genes: Arid4a, Tomm20l, Timm9  
omitted Genes: 2700049A03Rik, 1700083H02Rik, 4930404H11Rik  
omitted Genes: Ccdc175, Rtn1, Lrrc9  
omitted Genes: Pcnx4, Ppm1a, 4930447C04Rik  
omitted Genes: Mnat1, Trmt5, Slc38a6  
omitted Genes: D830013O20Rik, 2210039B01Rik, Syt16  
omitted Genes: 1700086L19Rik, Dbpht2, Wdr89  
omitted Genes: Rplp2-ps1, Sgpp1, Mir5101  
omitted Genes: Mthfd1, Zbtb25, Zbtb1  
omitted Genes: Hspa2, Ppp1r36, Gm10451  
omitted Genes: Mir5135, Plekhg3, AI463170  
omitted Genes: Churc1, Rab15, Fut8

Fine-mapping Regions

| snp            | chr | pos (Mb) | pp        | group        | color  |
|----------------|-----|----------|-----------|--------------|--------|
| chr12:71860639 | 12  | 71.86064 | 0.1766683 | Credible Set | purple |
| chr12:71948169 | 12  | 71.94817 | 0.1766683 | Credible Set | purple |
| chr12:72342885 | 12  | 72.34288 | 0.1773017 | Credible Set | purple |
| chr12:72885260 | 12  | 72.88526 | 0.1621440 | Credible Set | purple |
| chr12:73260123 | 12  | 73.26012 | 0.1405488 | Credible Set | purple |
| chr12:73468910 | 12  | 73.46891 | 0.1666690 | Credible Set | purple |

# F34 Array, routine WBC differential white blood cell count

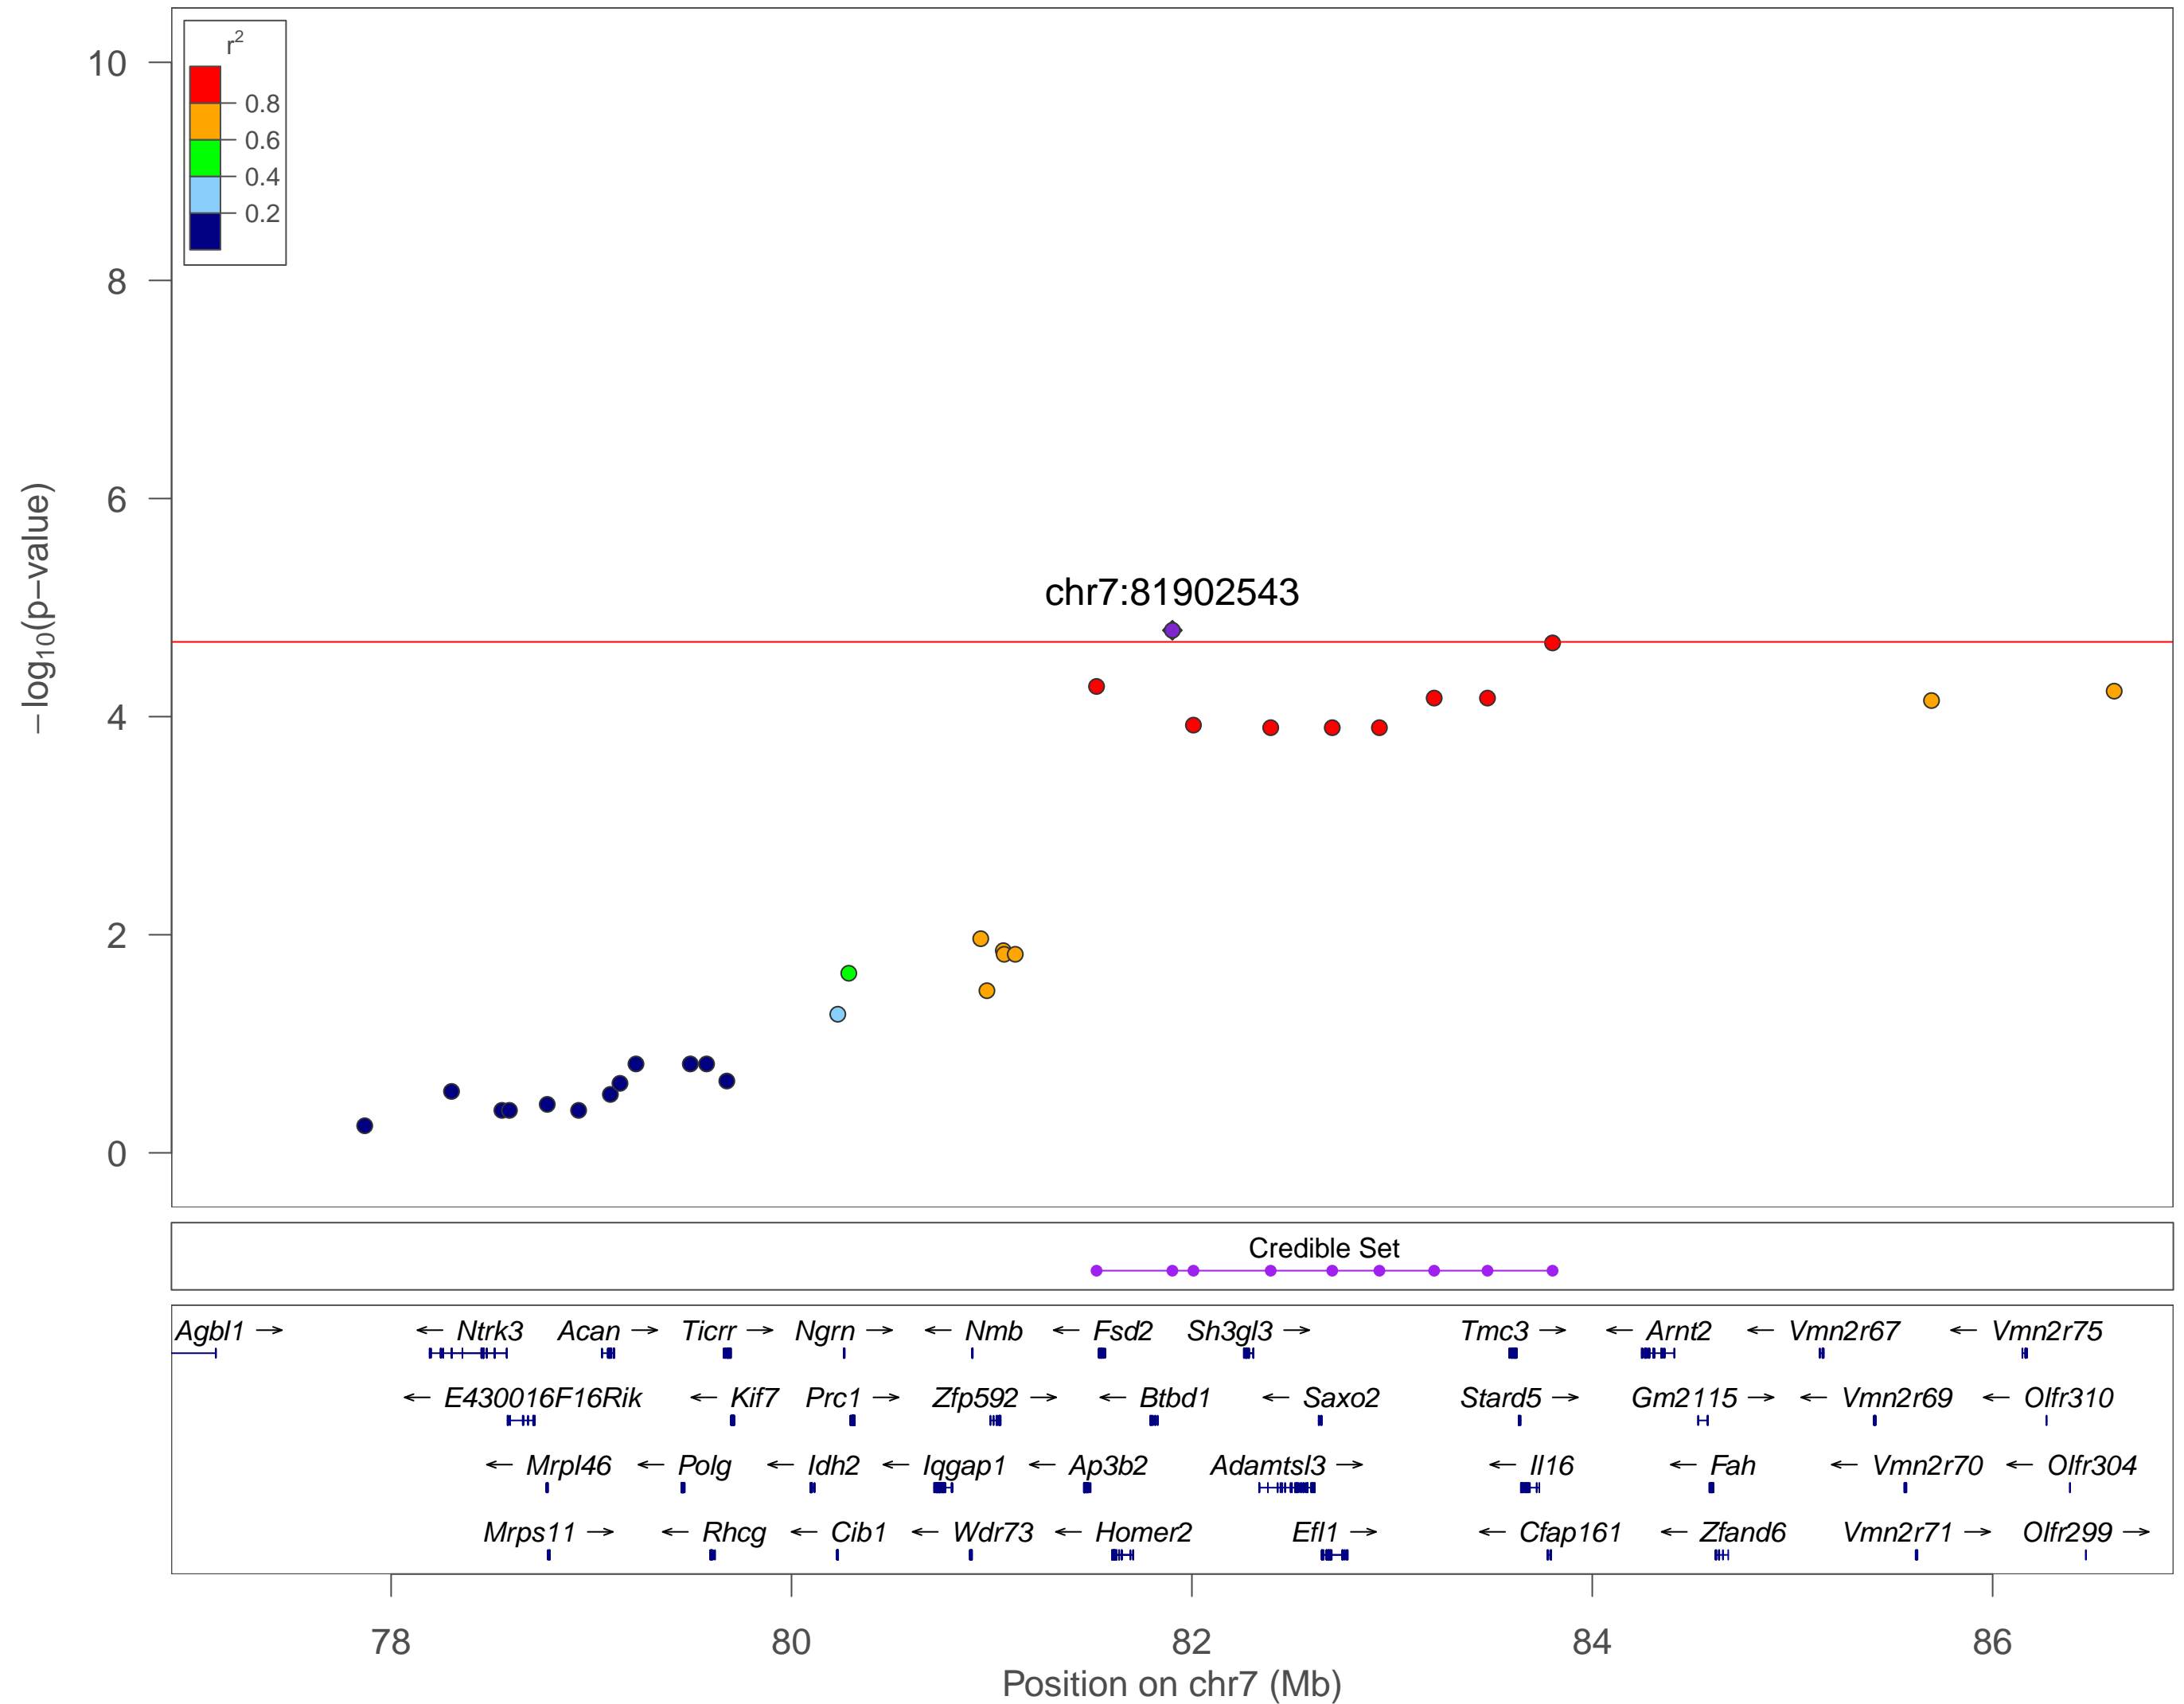

date: Thu Oct 25 16:45:32 2018  
build: F34Array  
display range: chr7:76902543–86902543 [76902543–86902543]  
hilite range: 0 – 0 [ 0 – 0 ]  
reference SNP: chr7:81902543  
number of SNPs plotted: 31  
min P-value: 1.62E–5 [chr7:81902543]  
max P-value: 5.64E–1 [chr7:77868097]  
omitted Genes: Det1, Mir7–2, Aen  
omitted Genes: Isg20, Gm26633, Hapln3  
omitted Genes: Mfge8, Abhd2, Rlbp1  
omitted Genes: Fanci, Mir9–3hg, Mir9–3  
omitted Genes: Plin1, Pex11a, Wdr93  
omitted Genes: Mesp1, Mesp2, Anpep  
omitted Genes: Ap3s2, Arpin, Zfp710  
omitted Genes: Gm21057, Sema4b, Gdpgp1  
omitted Genes: Ttl13, Vps33b, Rccd1  
omitted Genes: Unc45a, Hddc3, Man2a2  
omitted Genes: Fes, Furin, Blm  
omitted Genes: Crtc3, Gm15880, Zscan2  
omitted Genes: Sec11a, Alpk3, Slc28a1  
omitted Genes: Pde8a, Rps17, Cpeb1  
omitted Genes: BC048679, 2900076A07Rik, Mir1839  
omitted Genes: Whamm, Fam103a1, 3110040N11Rik  
omitted Genes: Tm6sf1, Hdgfrp3, Bnc1  
omitted Genes: Gm20744, 4933406J10Rik, Mex3b  
omitted Genes: 4933430H16Rik, Mesdc1, Mesdc2  
omitted Genes: Cemip, Abhd17c, 2610206C17Rik  
omitted Genes: Olfr291, Olfr290, Vmn2r65  
omitted Genes: Vmn2r66, Vmn2r68, Vmn2r72  
omitted Genes: Vmn2r73, Vmn2r74, Vmn2r76  
omitted Genes: Olfr309, Olfr308, Olfr307  
omitted Genes: Olfr305, Olfr303, Olfr301  
omitted Genes: Olfr298, Olfr297, Olfr295  
omitted Genes: Olfr294, Olfr293, Olfr292  
omitted Genes: Folh1, Vmn2r77

Fine-mapping Regions

| snp           | chr | pos (Mb) | pp         | group        | color  |
|---------------|-----|----------|------------|--------------|--------|
| chr7:81523675 | 7   | 81.52367 | 0.10160705 | Credible Set | purple |
| chr7:81902543 | 7   | 81.90254 | 0.31339737 | Credible Set | purple |
| chr7:82007699 | 7   | 82.00770 | 0.04694282 | Credible Set | purple |
| chr7:82393693 | 7   | 82.39369 | 0.04460747 | Credible Set | purple |
| chr7:82701107 | 7   | 82.70111 | 0.04460747 | Credible Set | purple |
| chr7:82936666 | 7   | 82.93667 | 0.04460747 | Credible Set | purple |
| chr7:83210268 | 7   | 83.21027 | 0.08050627 | Credible Set | purple |
| chr7:83476529 | 7   | 83.47653 | 0.08050627 | Credible Set | purple |
| chr7:83801589 | 7   | 83.80159 | 0.24321781 | Credible Set | purple |

# F34 Array, routine WBC differential white blood cell count

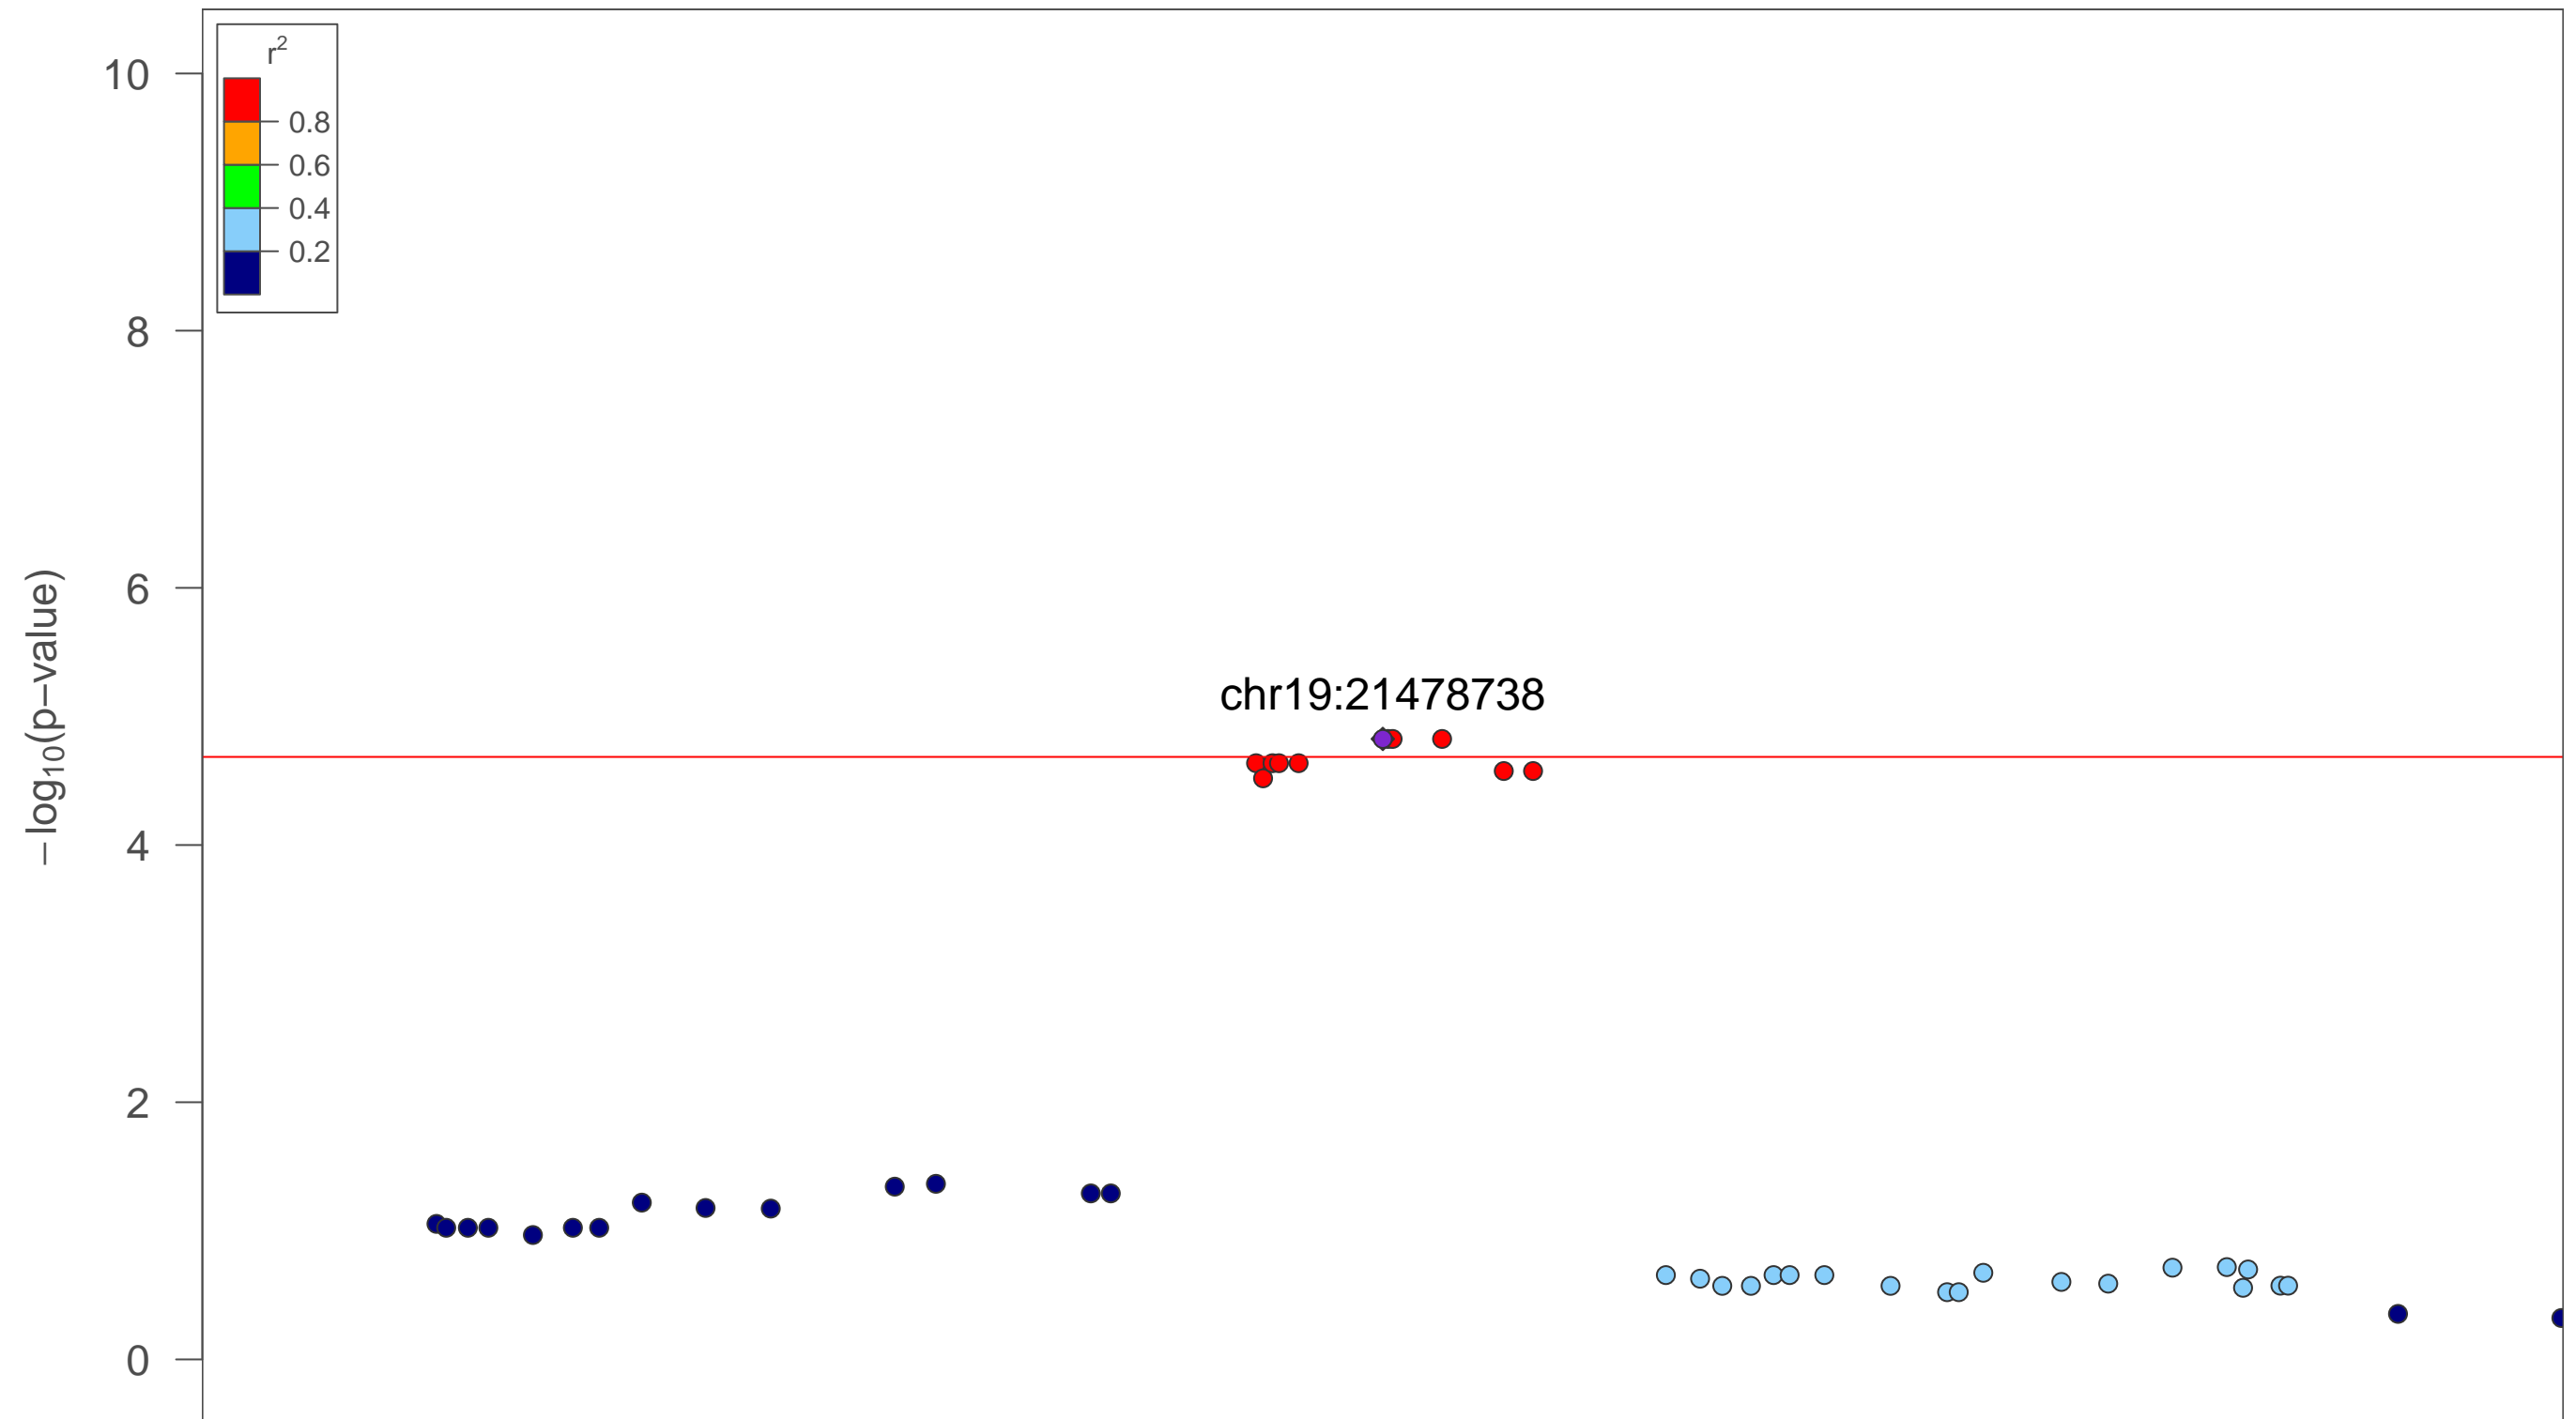

Credible Set

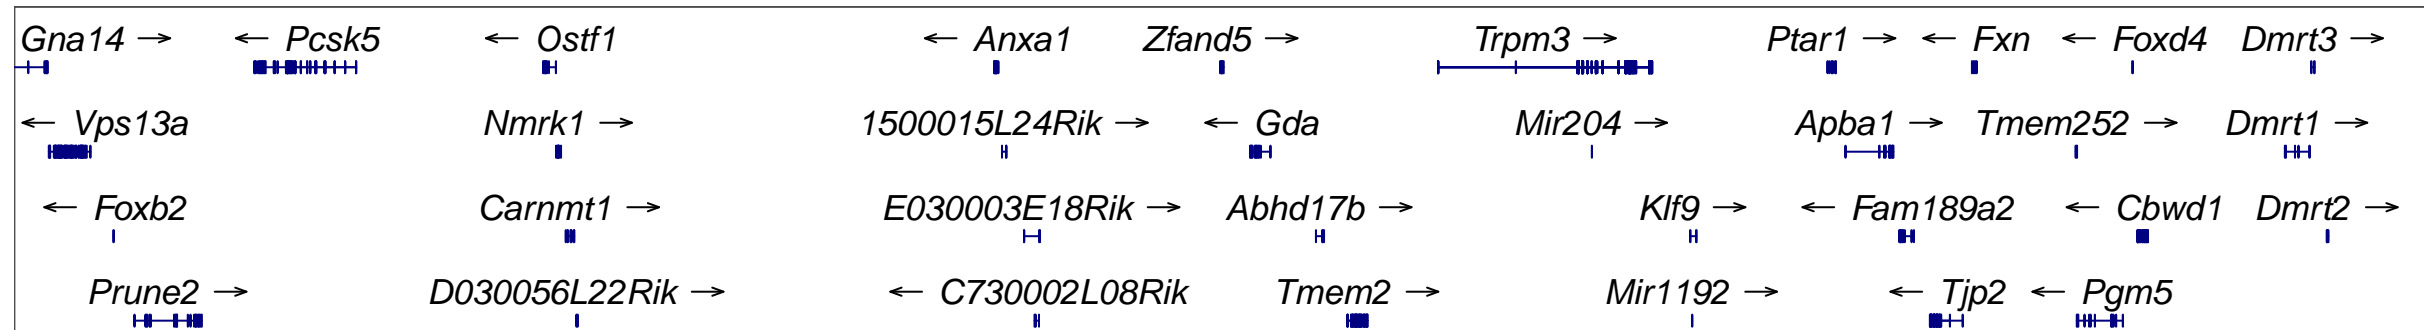

18 genes  
omitted

18

20

22

24

26

Position on chr19 (Mb)

date: Thu Oct 25 16:45:24 2018  
build: F34Array  
display range: chr19:16478738–26478738 [16478738–26478738]  
hilite range: 0 – 0 [ 0 – 0 ]  
reference SNP: chr19:21478738  
number of SNPs plotted: 47  
min P-value: 1.5E–5 [chr19:21478738]  
max P-value: 4.76E–1 [chr19:26470094]  
omitted Genes: Gcnt1, Rfk, Trpm6  
omitted Genes: Rorb, Aldh1a1, Aldh1a7  
omitted Genes: Tmc1, 4930554I06Rik, 1110059E24Rik  
omitted Genes: Smc5, Mamdc2, 1700028P14Rik  
omitted Genes: Pip5k1b, Fam122a, Mir3084–1  
omitted Genes: Dock8, Kank1, 2610016A17Rik



Fine-mapping Regions

| snp            | chr | pos (Mb) | pp         | group        | color  |
|----------------|-----|----------|------------|--------------|--------|
| chr19:20941927 | 19  | 20.94193 | 0.07955138 | Credible Set | purple |
| chr19:20971640 | 19  | 20.97164 | 0.06146381 | Credible Set | purple |
| chr19:21011731 | 19  | 21.01173 | 0.07955138 | Credible Set | purple |
| chr19:21038918 | 19  | 21.03892 | 0.07955138 | Credible Set | purple |
| chr19:21122136 | 19  | 21.12214 | 0.07955138 | Credible Set | purple |
| chr19:21478738 | 19  | 21.47874 | 0.12027742 | Credible Set | purple |
| chr19:21500356 | 19  | 21.50036 | 0.12027742 | Credible Set | purple |
| chr19:21520189 | 19  | 21.52019 | 0.12027742 | Credible Set | purple |
| chr19:21729752 | 19  | 21.72975 | 0.12027742 | Credible Set | purple |
| chr19:21991002 | 19  | 21.99100 | 0.06961049 | Credible Set | purple |
| chr19:22115053 | 19  | 22.11505 | 0.06961049 | Credible Set | purple |

# F34 Array, routine WBC differential lymphocyte number

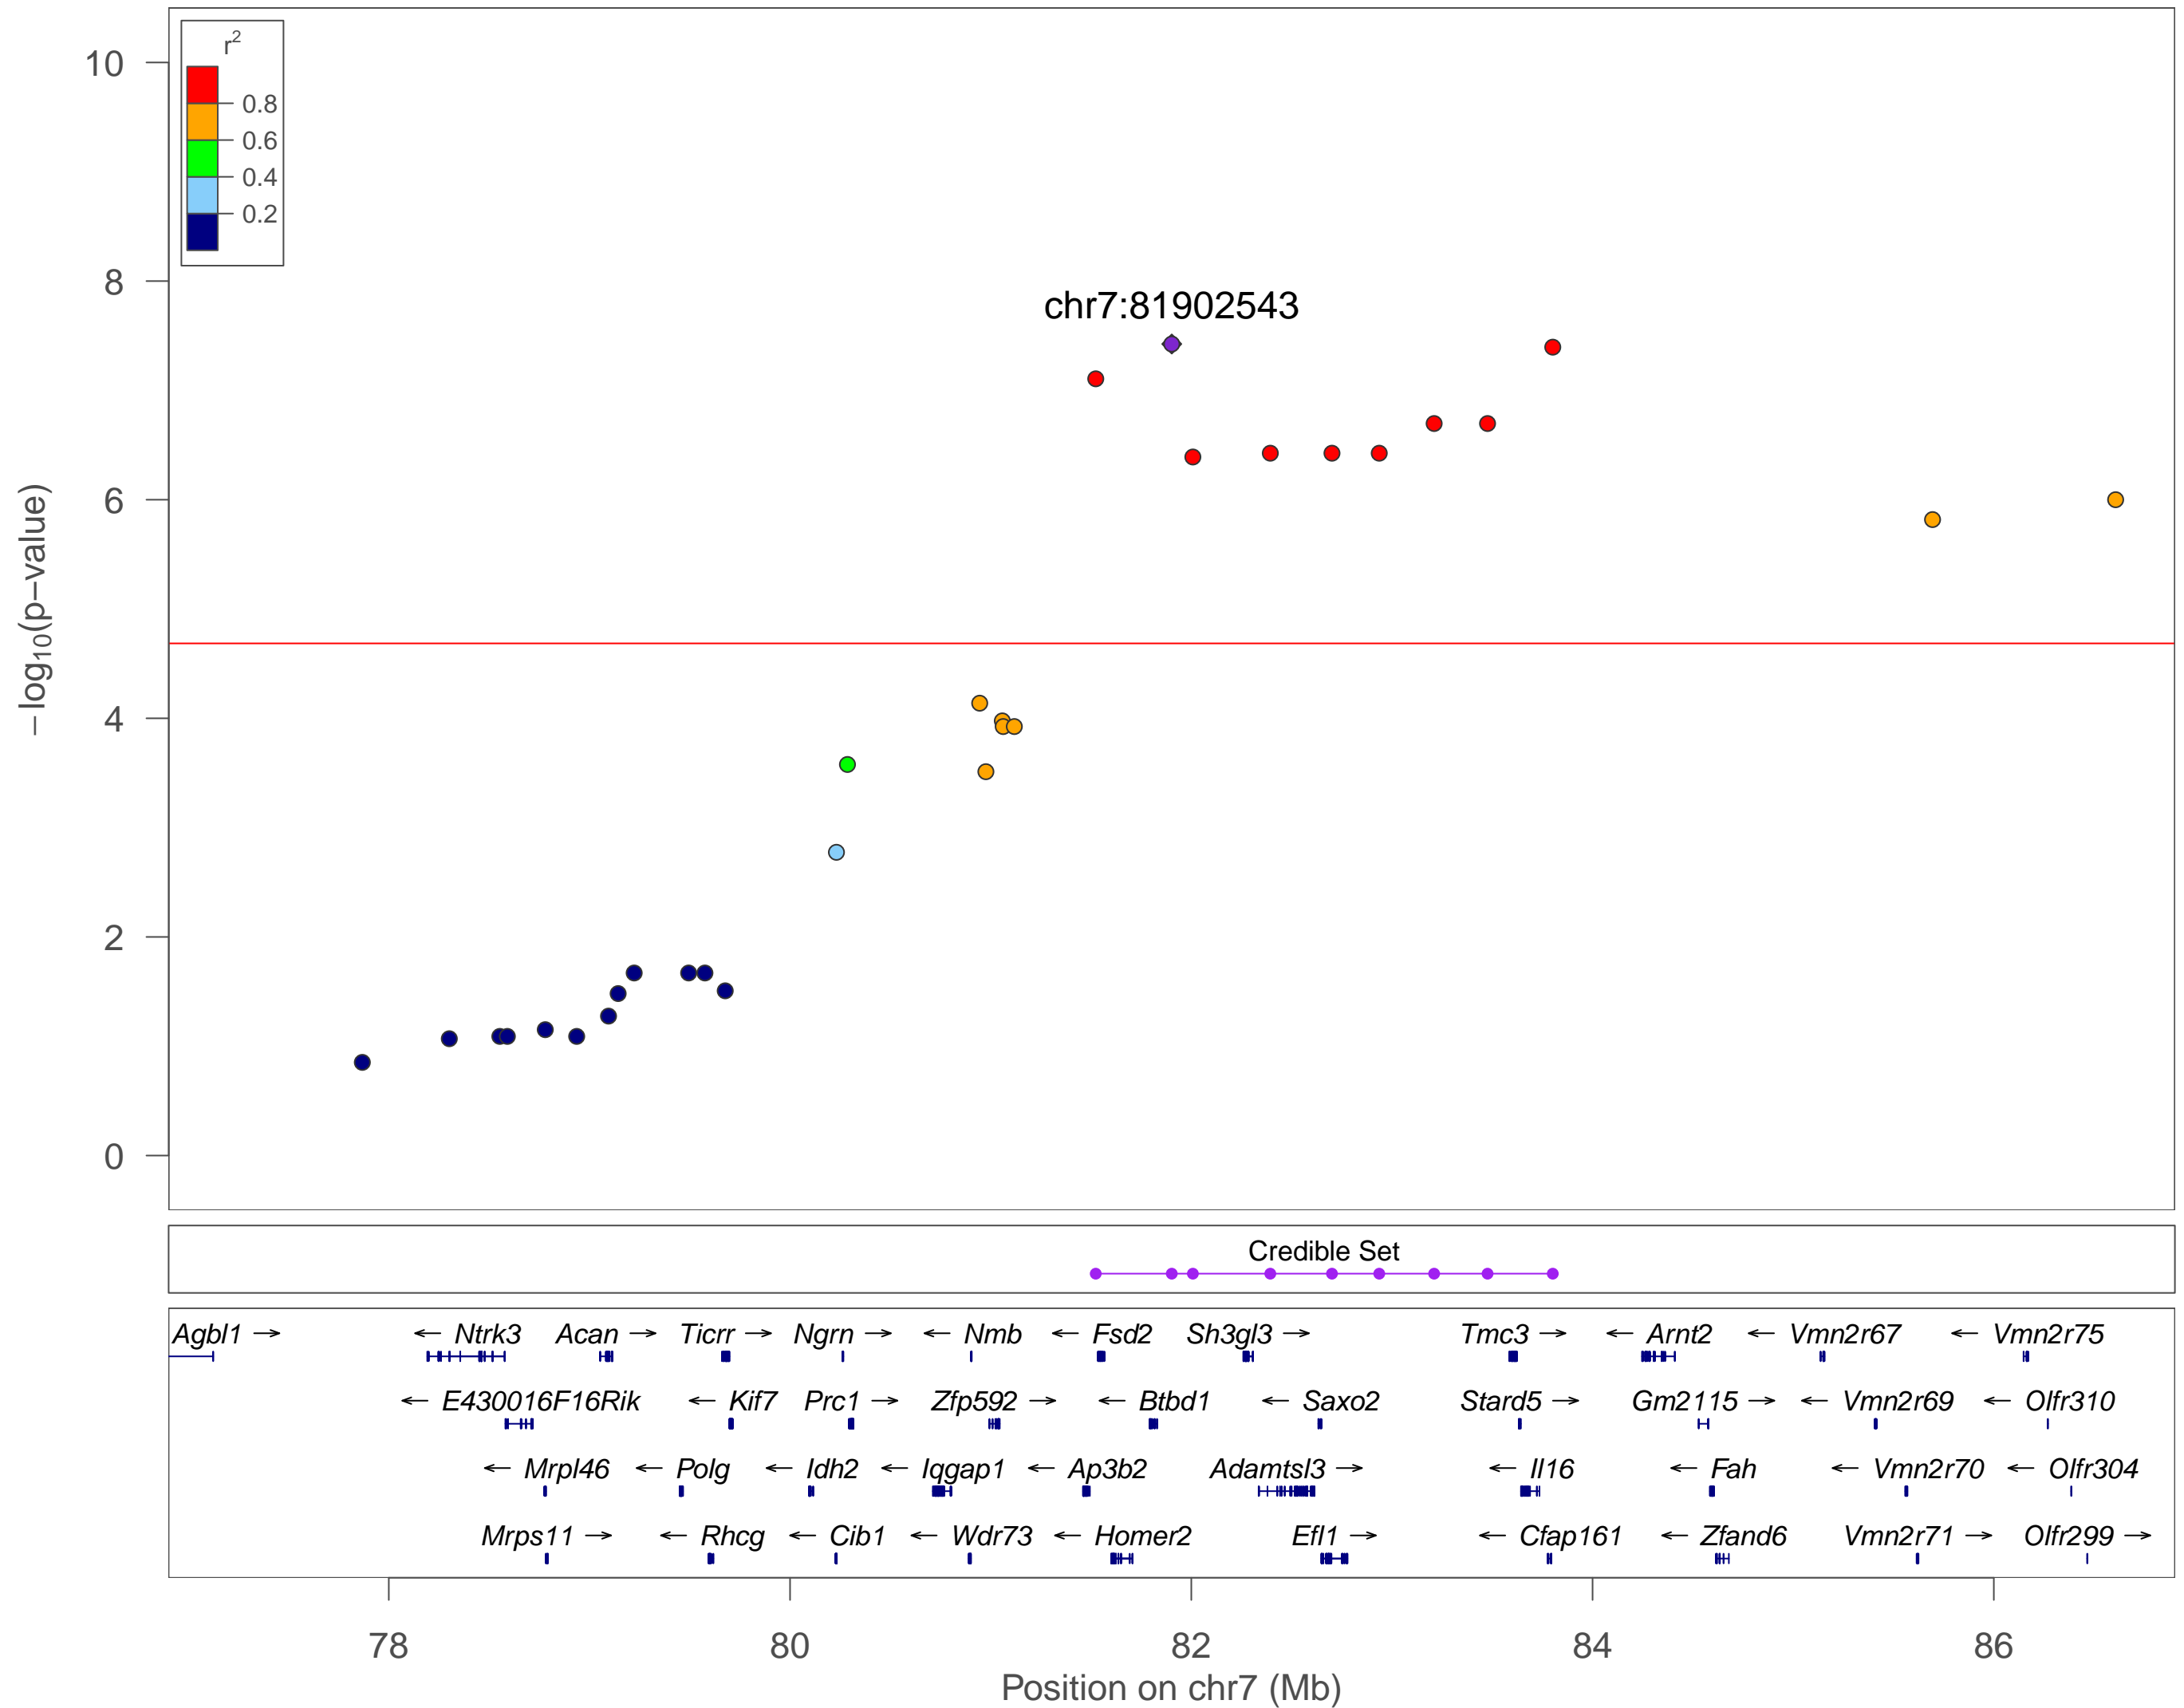

date: Thu Oct 25 16:45:40 2018  
build: F34Array  
display range: chr7:76902543–86902543 [76902543–86902543]  
hilite range: 0 – 0 [ 0 – 0 ]  
reference SNP: chr7:81902543  
number of SNPs plotted: 31  
min P-value: 3.76E–8 [chr7:81902543]  
max P-value: 1.4E–1 [chr7:77868097]  
omitted Genes: Det1, Mir7–2, Aen  
omitted Genes: Isg20, Gm26633, Hapln3  
omitted Genes: Mfge8, Abhd2, Rlbp1  
omitted Genes: Fanci, Mir9–3hg, Mir9–3  
omitted Genes: Plin1, Pex11a, Wdr93  
omitted Genes: Mesp1, Mesp2, Anpep  
omitted Genes: Ap3s2, Arpin, Zfp710  
omitted Genes: Gm21057, Sema4b, Gdpgp1  
omitted Genes: Ttll13, Vps33b, Rccd1  
omitted Genes: Unc45a, Hddc3, Man2a2  
omitted Genes: Fes, Furin, Blm  
omitted Genes: Crtc3, Gm15880, Zscan2  
omitted Genes: Sec11a, Alpk3, Slc28a1  
omitted Genes: Pde8a, Rps17, Cpeb1  
omitted Genes: BC048679, 2900076A07Rik, Mir1839  
omitted Genes: Whamm, Fam103a1, 3110040N11Rik  
omitted Genes: Tm6sf1, Hdgfrp3, Bnc1  
omitted Genes: Gm20744, 4933406J10Rik, Mex3b  
omitted Genes: 4933430H16Rik, Mesdc1, Mesdc2  
omitted Genes: Cemip, Abhd17c, 2610206C17Rik  
omitted Genes: Olfr291, Olfr290, Vmn2r65  
omitted Genes: Vmn2r66, Vmn2r68, Vmn2r72  
omitted Genes: Vmn2r73, Vmn2r74, Vmn2r76  
omitted Genes: Olfr309, Olfr308, Olfr307  
omitted Genes: Olfr305, Olfr303, Olfr301  
omitted Genes: Olfr298, Olfr297, Olfr295  
omitted Genes: Olfr294, Olfr293, Olfr292  
omitted Genes: Folh1, Vmn2r77

Fine-mapping Regions

| snp           | chr | pos (Mb) | pp         | group        | color  |
|---------------|-----|----------|------------|--------------|--------|
| chr7:81523675 | 7   | 81.52367 | 0.15135341 | Credible Set | purple |
| chr7:81902543 | 7   | 81.90254 | 0.30774554 | Credible Set | purple |
| chr7:82007699 | 7   | 82.00770 | 0.03078917 | Credible Set | purple |
| chr7:82393693 | 7   | 82.39369 | 0.03325479 | Credible Set | purple |
| chr7:82701107 | 7   | 82.70111 | 0.03325479 | Credible Set | purple |
| chr7:82936666 | 7   | 82.93667 | 0.03325479 | Credible Set | purple |
| chr7:83210268 | 7   | 83.21027 | 0.06082235 | Credible Set | purple |
| chr7:83476529 | 7   | 83.47653 | 0.06082235 | Credible Set | purple |
| chr7:83801589 | 7   | 83.80159 | 0.28870281 | Credible Set | purple |

# F34 Array, routine WBC differential monocyte percentage

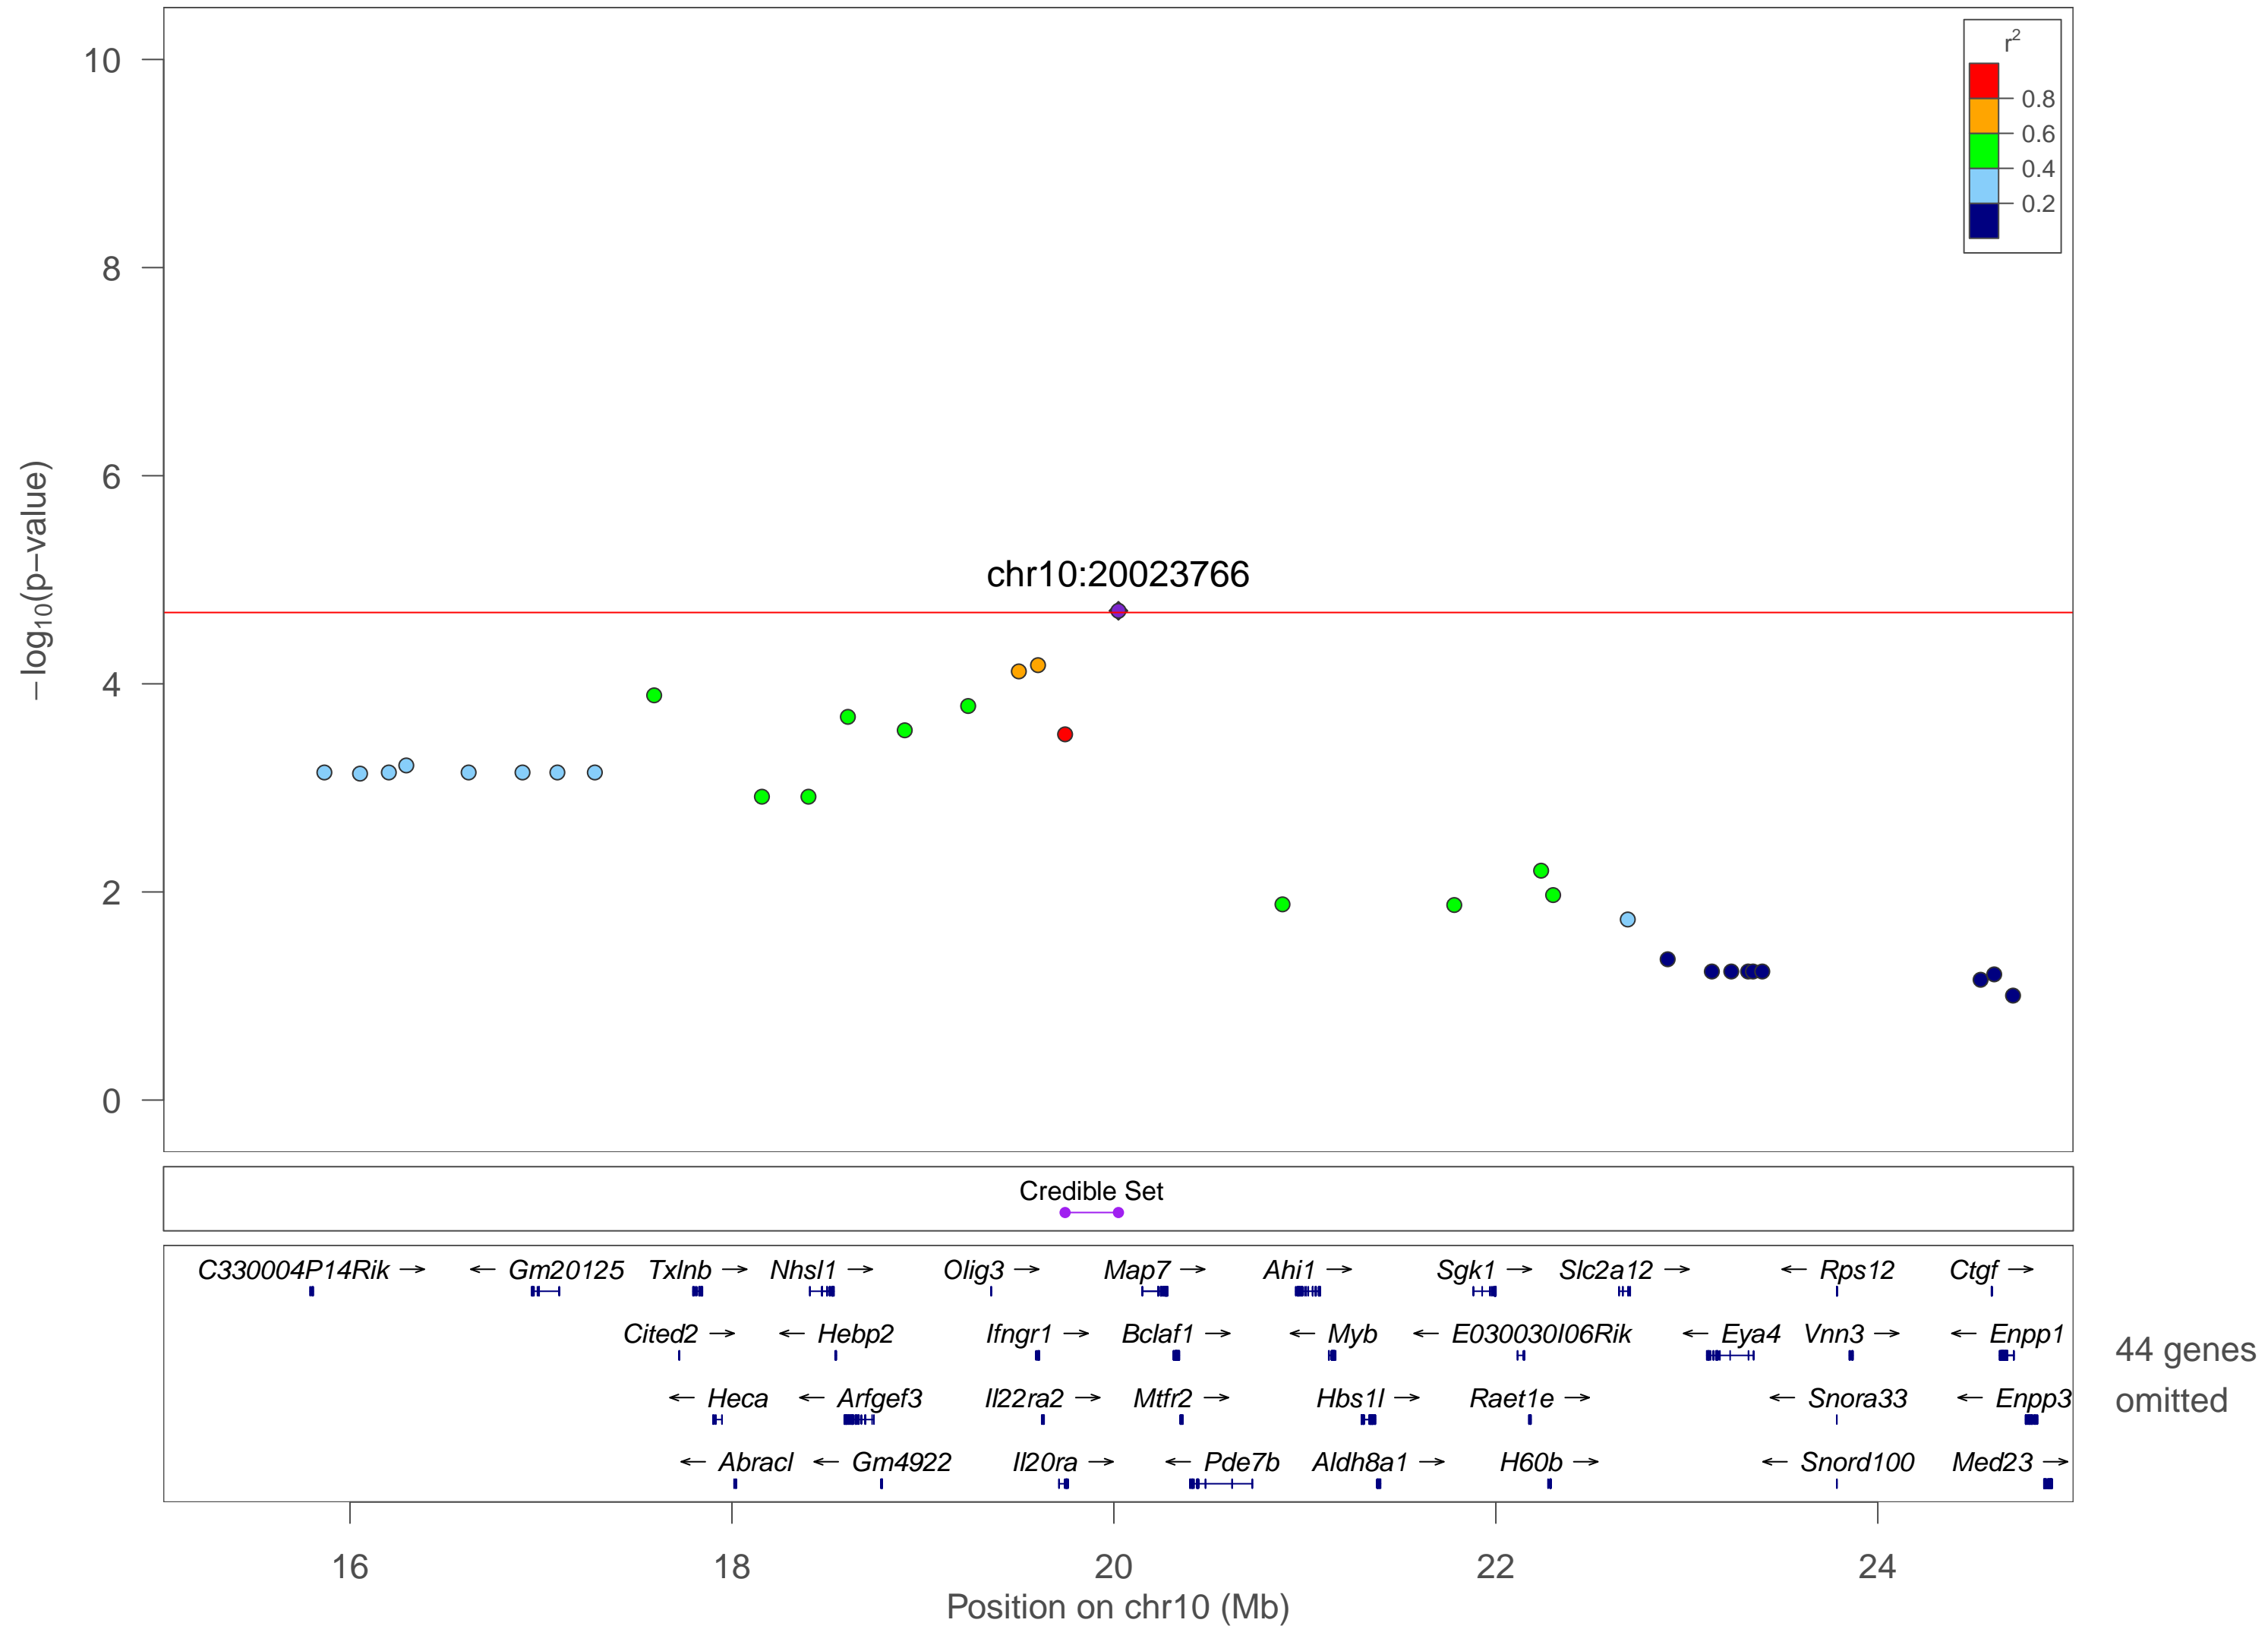

date: Thu Oct 25 16:45:48 2018  
build: F34Array  
display range: chr10:15023766–25023766 [15023766–25023766]  
hilite range: 0 – 0 [ 0 – 0 ]  
reference SNP: chr10:20023766  
number of SNPs plotted: 33  
min P-value: 1.99E–5 [chr10:20023766]  
max P-value: 9.9E–2 [chr10:24708091]  
omitted Genes: Repts1, Ect2l, Ccdc28a  
omitted Genes: 4930444F02Rik, Perp, Tnfaip3  
omitted Genes: Gm20139, Slc35d3, Pex7  
omitted Genes: Map3k5, 4930405J17Rik, Rpl32l  
omitted Genes: Mir6413, 4930455C13Rik, 1700020N01Rik  
omitted Genes: Gm5420, 4930444G20Rik, C920009B18Rik  
omitted Genes: Raet1d, Gm10825, Tbp1l  
omitted Genes: Mir7663, Tcf21, Slc18b1  
omitted Genes: Vnn1, Taar1, Taar2  
omitted Genes: Taar3, Taar4, Taar5  
omitted Genes: Taar6, Taar7a, Taar7b  
omitted Genes: Taar7d, Taar7e, Taar7f  
omitted Genes: Taar8a, Taar8b, Taar8c  
omitted Genes: Taar9, Stx7, Moxd1  
omitted Genes: Mir6905, Arg1

Fine-mapping Regions

| snp            | chr | pos (Mb) | pp        | group        | color  |
|----------------|-----|----------|-----------|--------------|--------|
| chr10:19744511 | 10  | 19.74451 | 0.0702341 | Credible Set | purple |
| chr10:20023766 | 10  | 20.02377 | 0.9297659 | Credible Set | purple |

F34 Array, routine WBC differential monocyte percentage

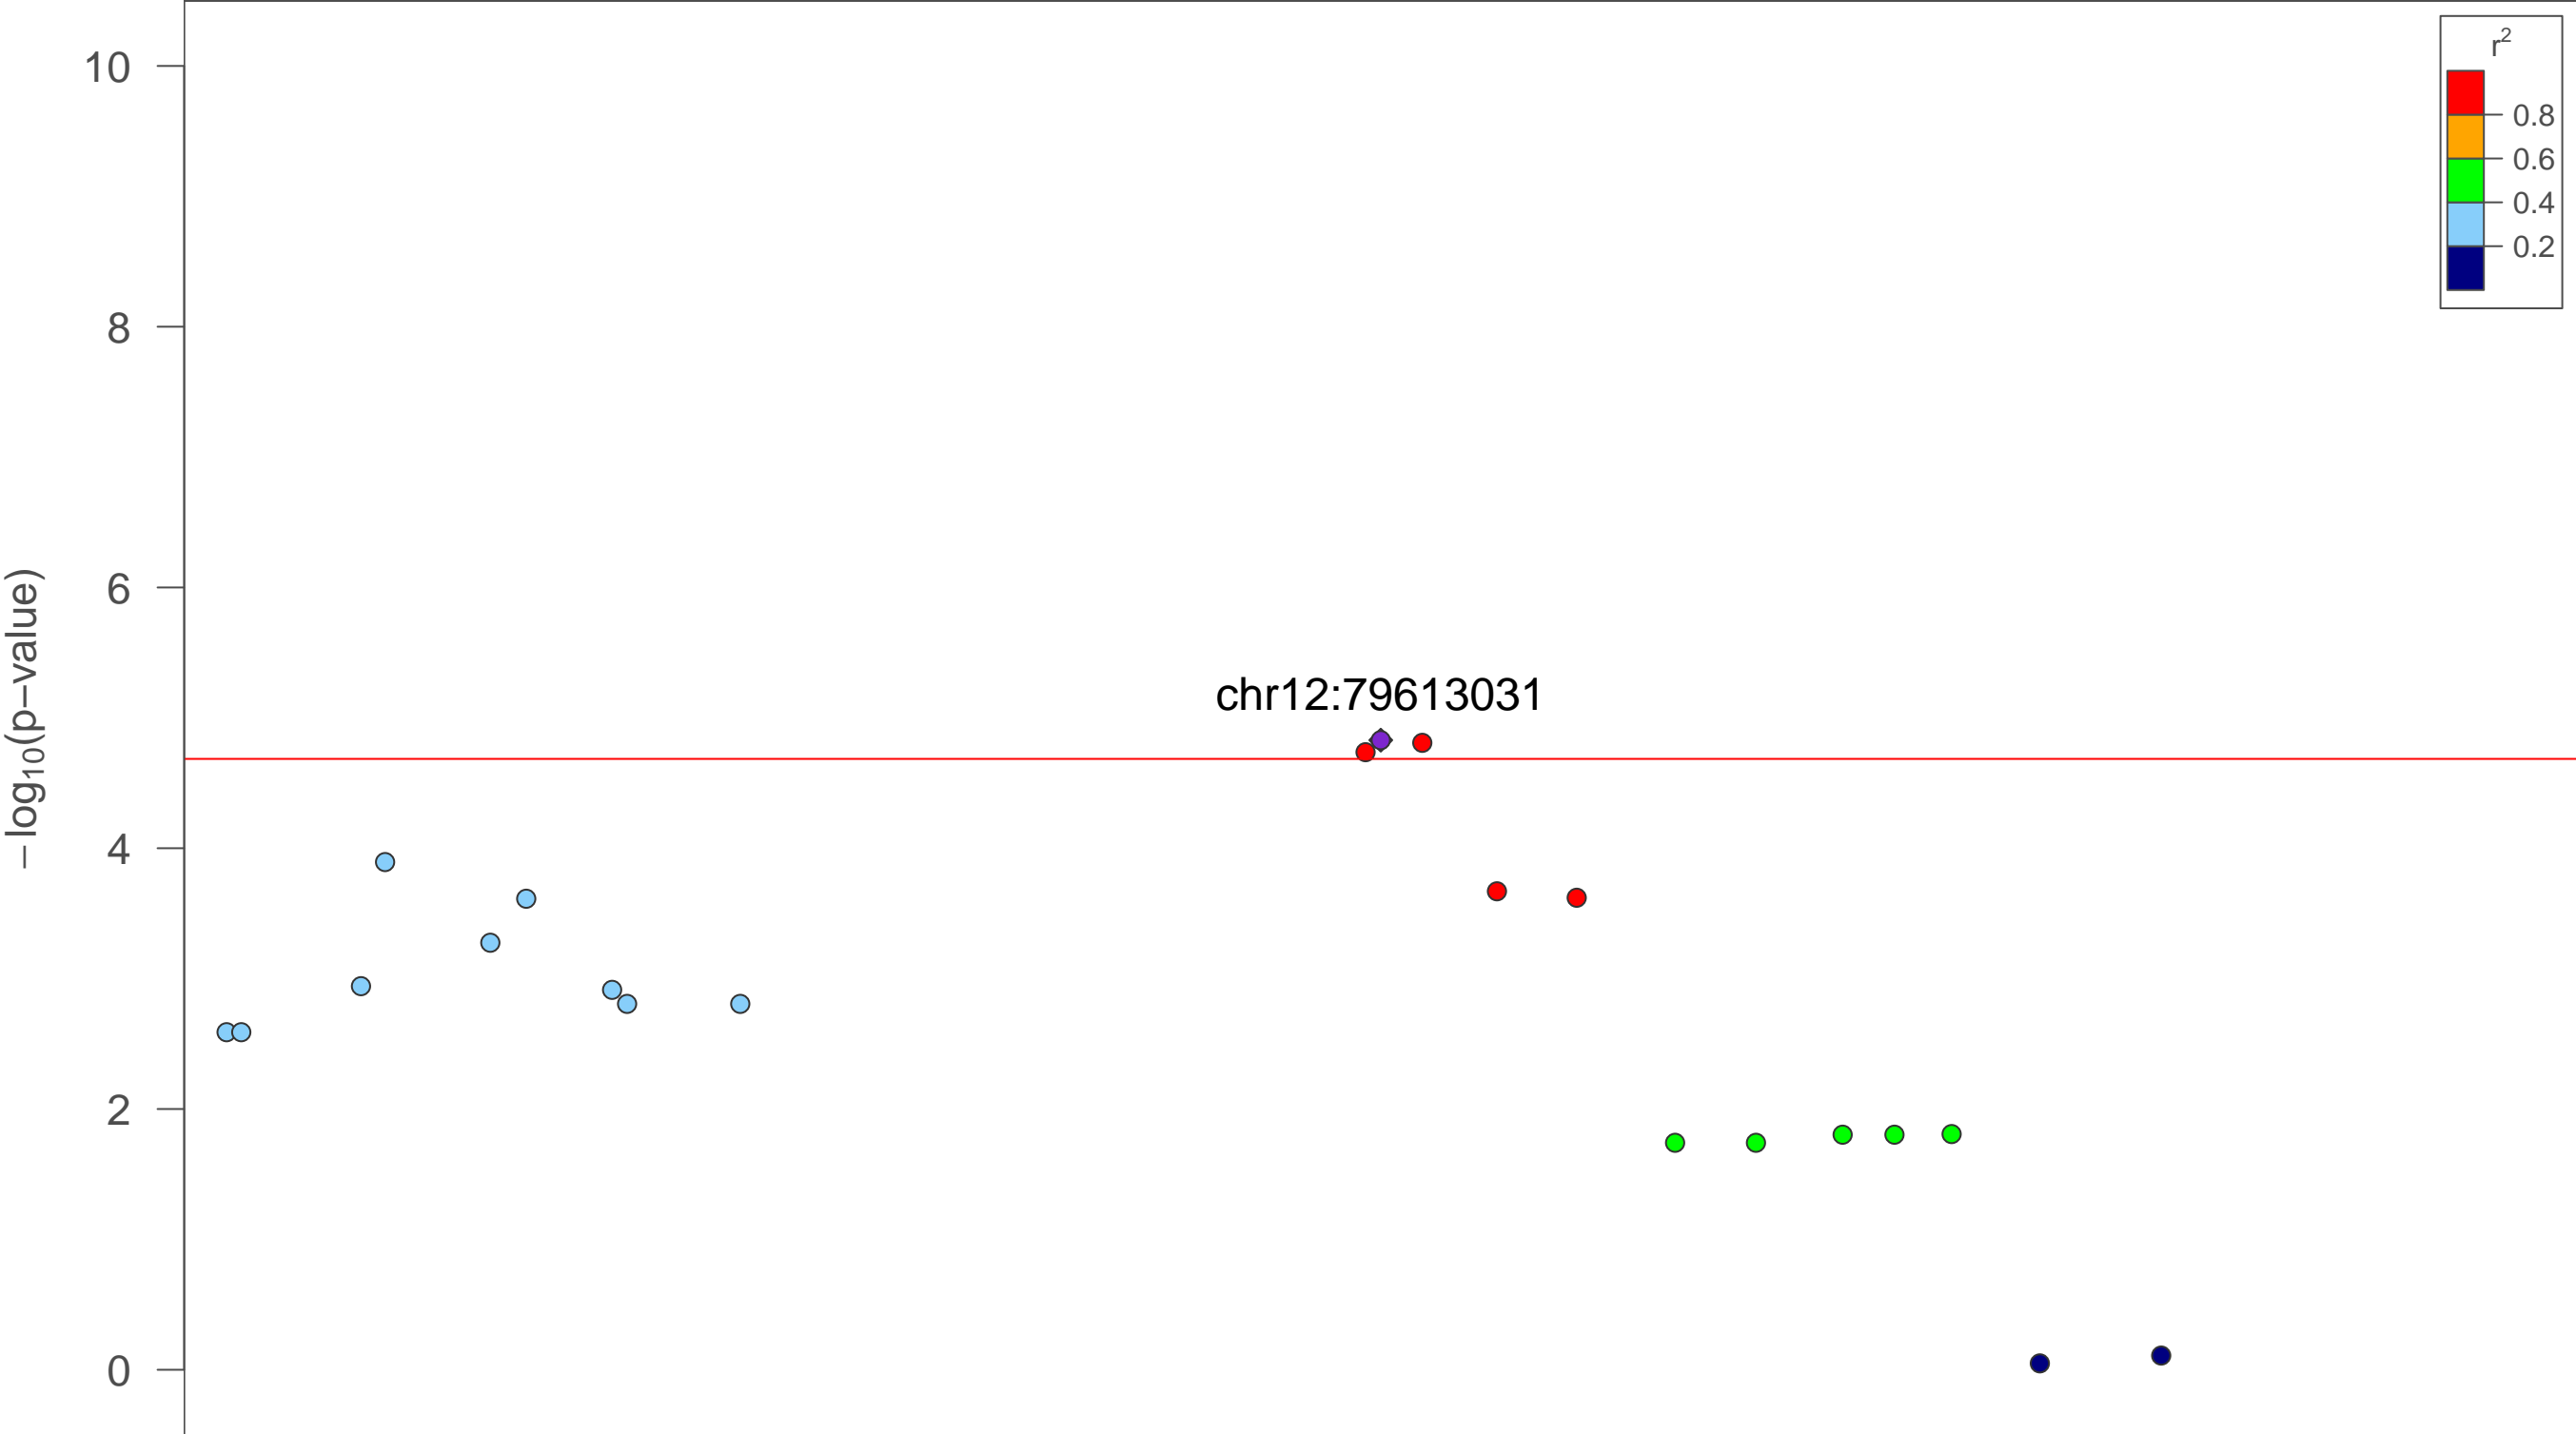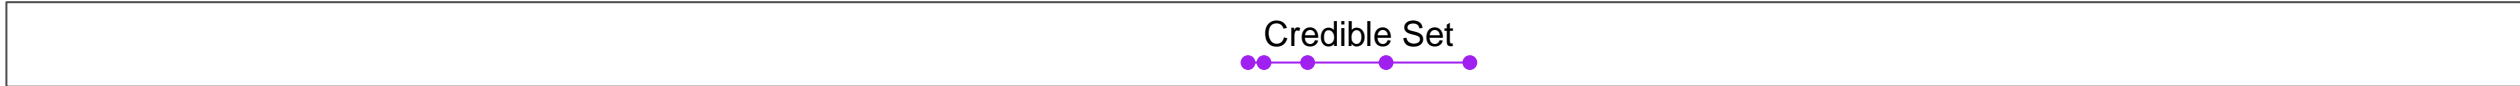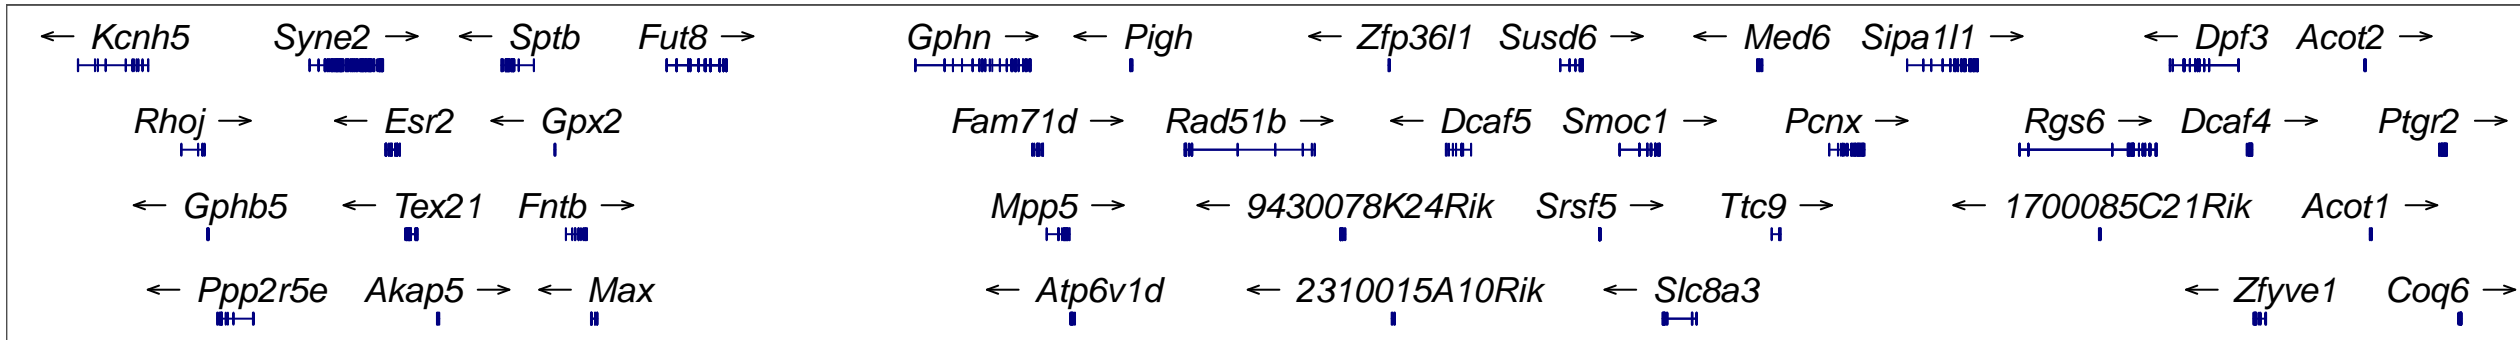

68 genes  
omitted



date: Thu Oct 25 16:45:56 2018  
build: F34Array  
display range: chr12:74613031–84613031 [74613031–84613031]  
hilite range: 0 – 0 [ 0 – 0 ]  
reference SNP: chr12:79613031  
number of SNPs plotted: 22  
min P-value: 1.48E–5 [chr12:79613031]  
max P-value: 8.93E–1 [chr12:82366650]  
omitted Genes: Wdr89, Rplp2-ps1, Sgpp1  
omitted Genes: Mir5101, Mthfd1, Zbtb25  
omitted Genes: Zbtb1, Hspa2, Ppp1r36  
omitted Genes: Gm10451, Mir5135, Plekhg3  
omitted Genes: Al463170, Churc1, Rab15  
omitted Genes: Eif2s1, Plek2, Tmem229b  
omitted Genes: Plekhh1, 9230116L04Rik, Arg2  
omitted Genes: Vti1b, Rdh11, Rdh12  
omitted Genes: Zfyve26, Actn1, Mir1843a  
omitted Genes: Scarna3b, Exd2, 2310002D06Rik  
omitted Genes: Galnt16, Erh, Slc39a9  
omitted Genes: Plekhd1os, Plekhd1, Ccdc177  
omitted Genes: 1700052I22Rik, Gm20337, Slc10a1  
omitted Genes: Mir3067, Cox16, Synj2bp-cox16  
omitted Genes: Gm4787, Adam4, Synj2bp  
omitted Genes: Adam21, Map3k9, Rbm25  
omitted Genes: Psen1, Papln, Numb  
omitted Genes: 2410016O06Rik, Acot4, Acot3  
omitted Genes: Acot5, Acot6, Dnal1  
omitted Genes: Pnma1, Elmsan1, Zfp410  
omitted Genes: Fam161b, Entpd5, Bbof1  
omitted Genes: Rnf113a2, Aldh6a1, Lin52  
omitted Genes: Vsx2, Abcd4

Fine-mapping Regions

| snp            | chr | pos (Mb) | pp         | group        | color  |
|----------------|-----|----------|------------|--------------|--------|
| chr12:79549412 | 12  | 79.54941 | 0.27927771 | Credible Set | purple |
| chr12:79613031 | 12  | 79.61303 | 0.34193524 | Credible Set | purple |
| chr12:79786451 | 12  | 79.78645 | 0.32692496 | Credible Set | purple |
| chr12:80098407 | 12  | 80.09841 | 0.02731771 | Credible Set | purple |
| chr12:80431588 | 12  | 80.43159 | 0.02454438 | Credible Set | purple |

F34 Array, routine WBC differential monocyte percentage

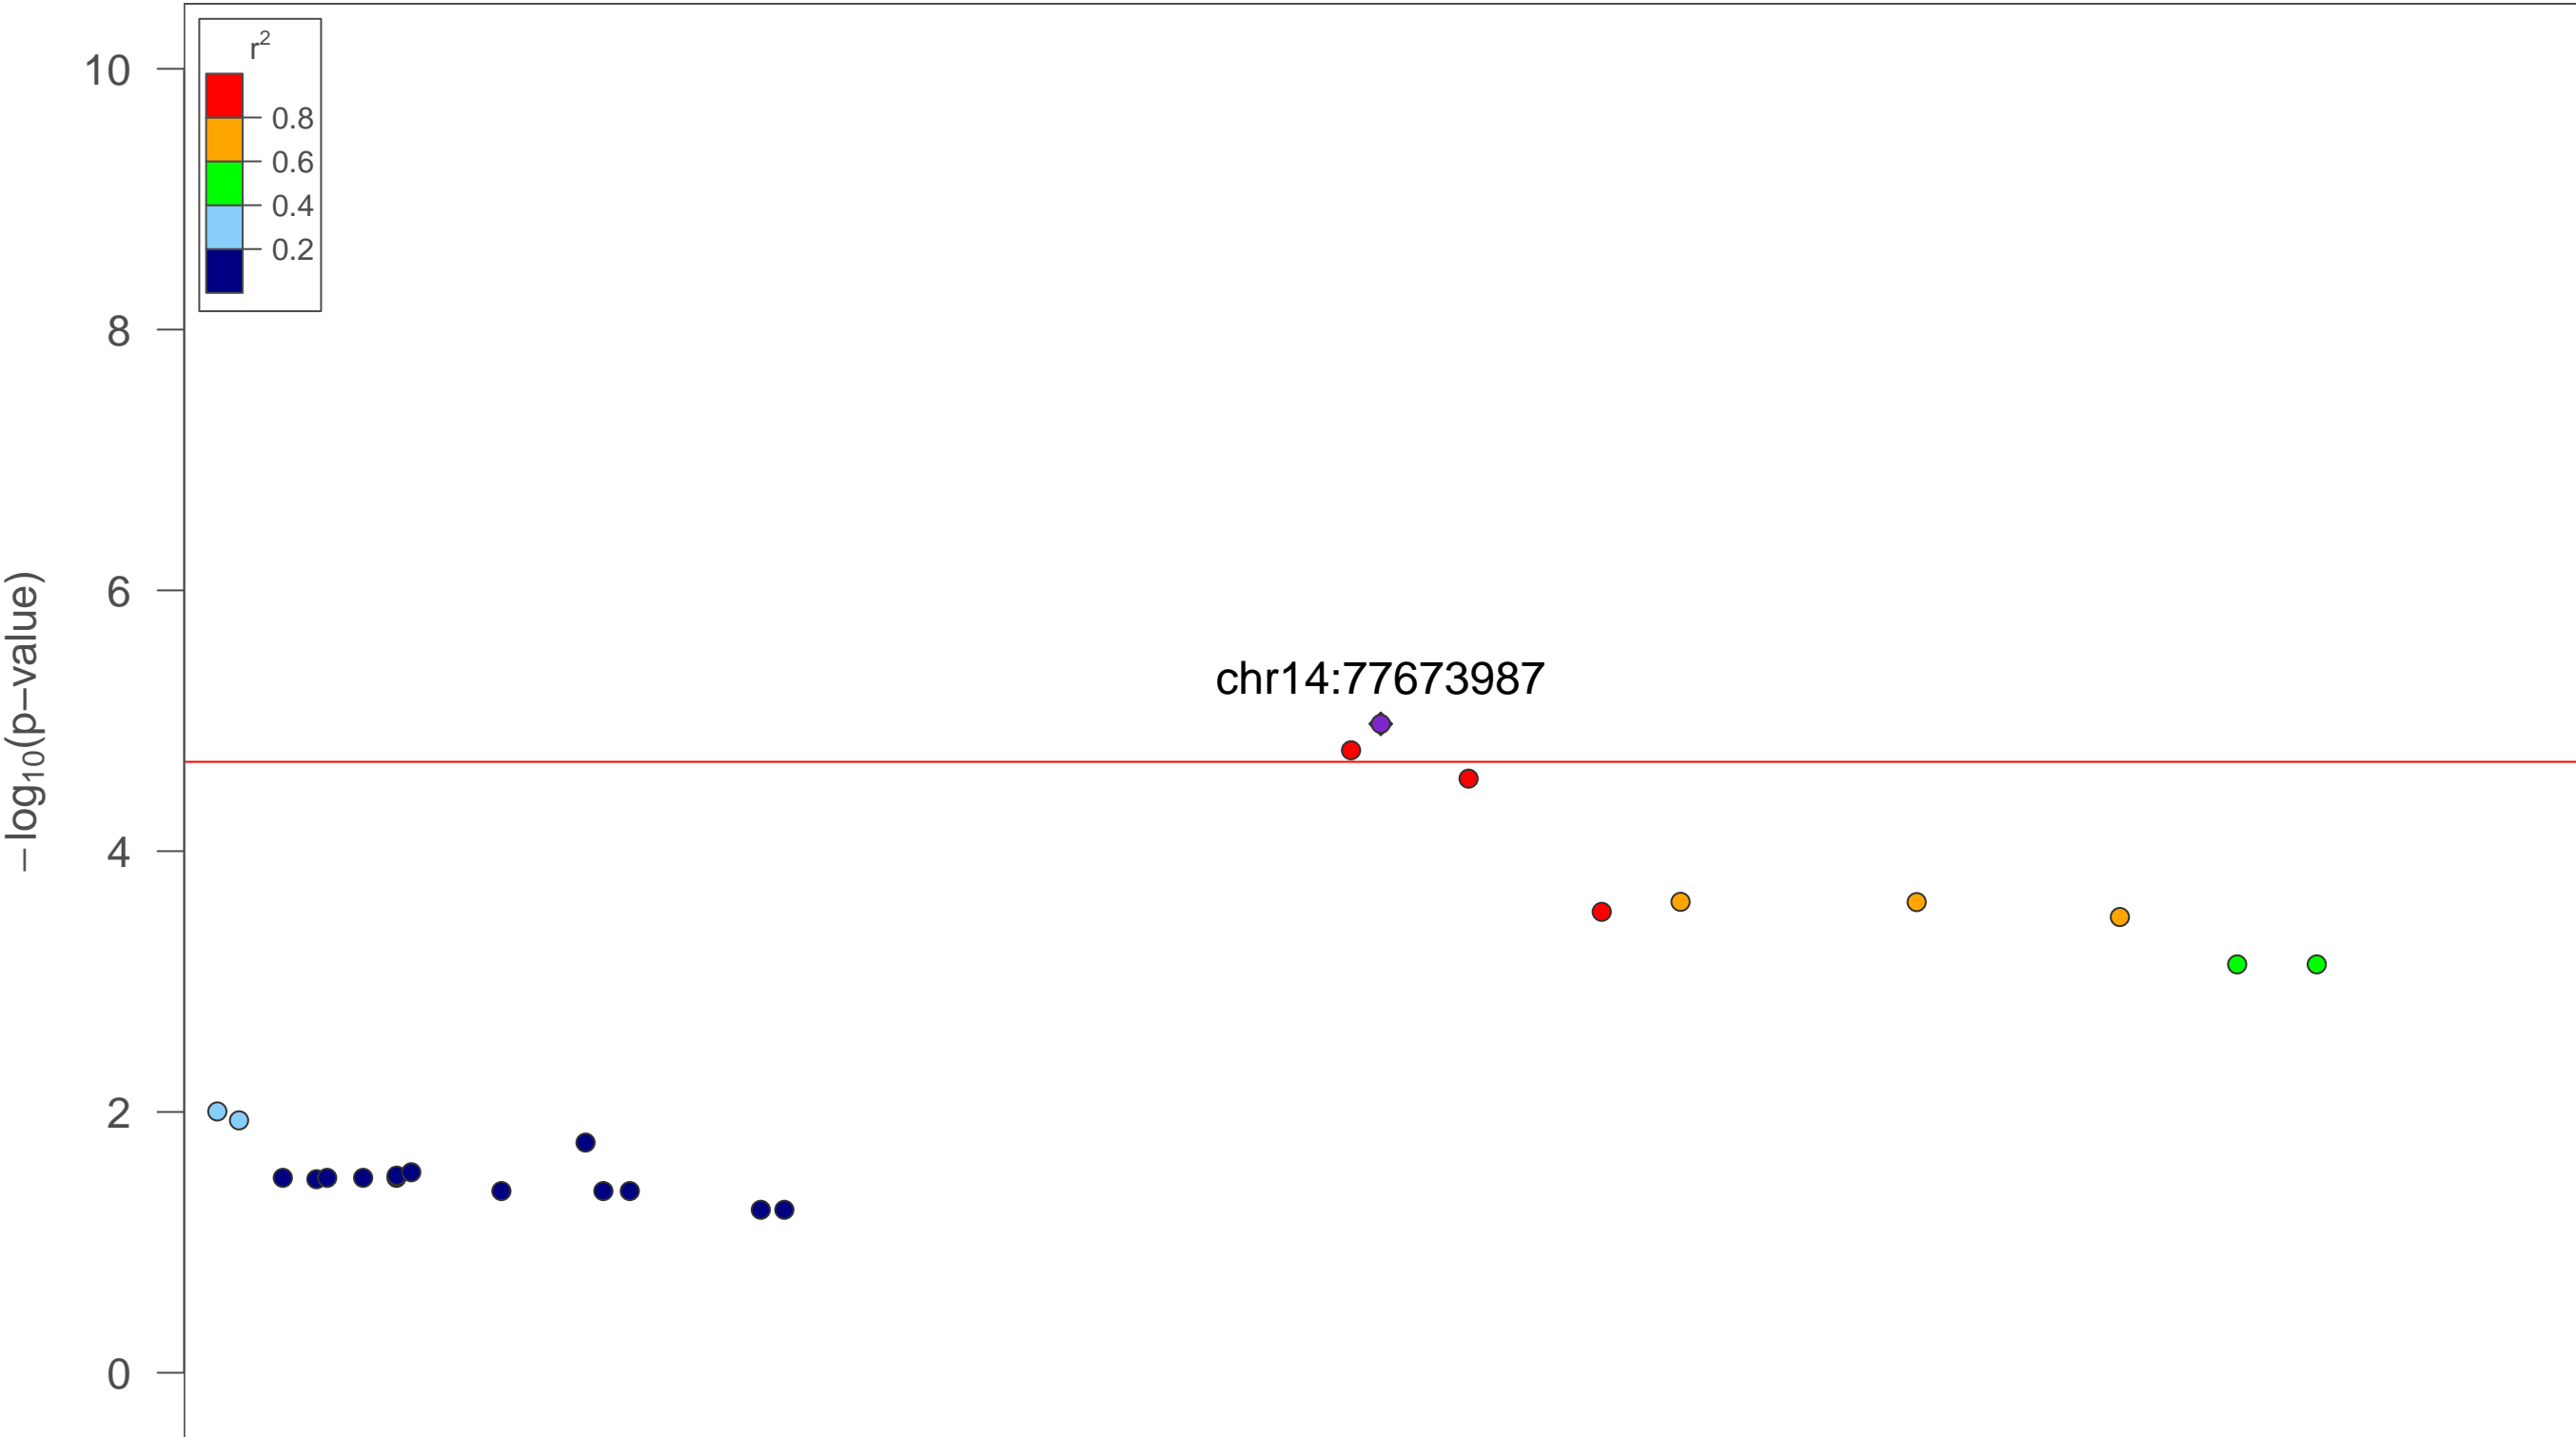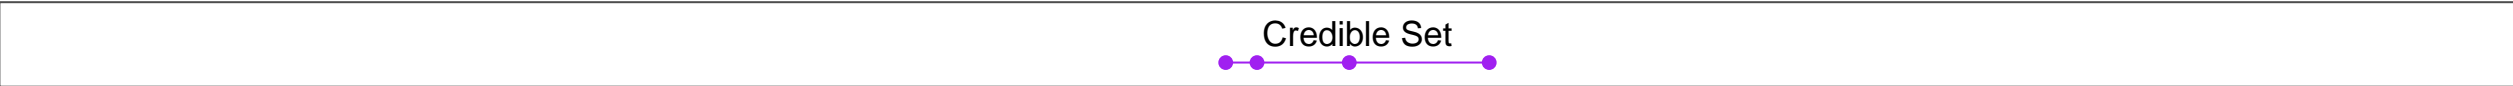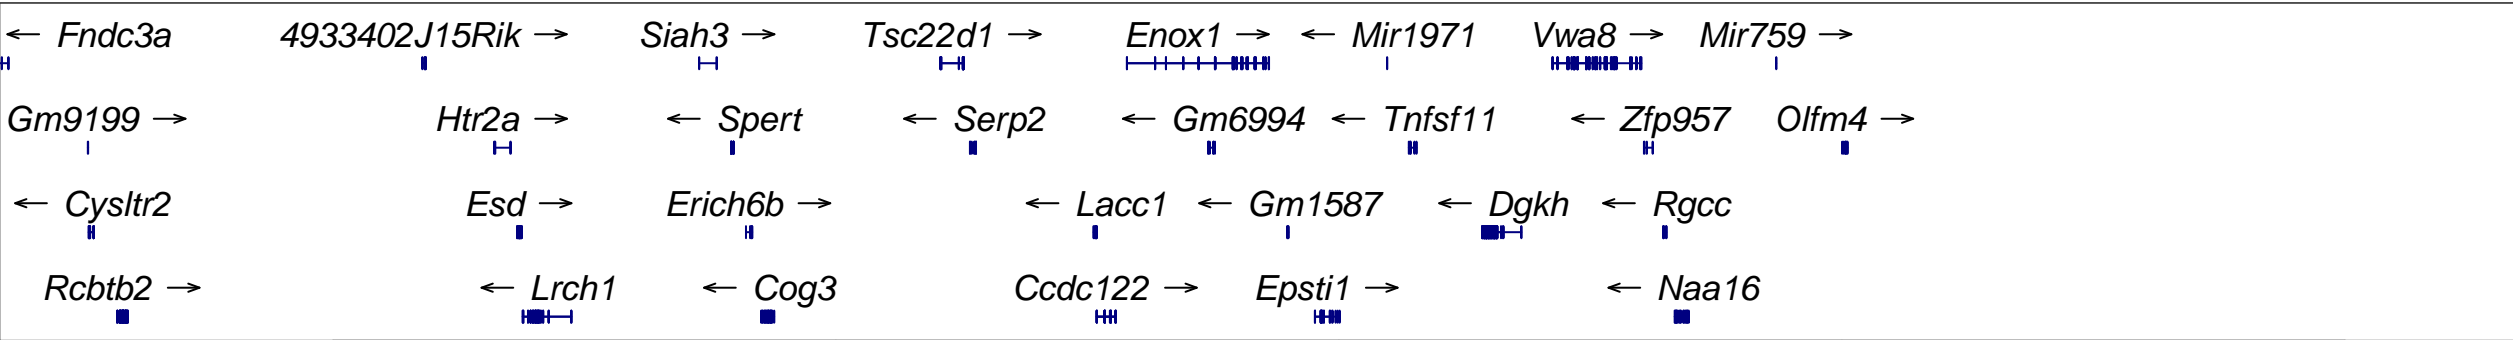

36 genes  
omitted

date: Thu Oct 25 16:46:03 2018  
build: F34Array  
display range: chr14:72673987–82673987 [72673987–82673987]  
hilite range: 0 – 0 [ 0 – 0 ]  
reference SNP: chr14:77673987  
number of SNPs plotted: 25  
min P-value: 1.06E–5 [chr14:77673987]  
max P-value: 5.62E–2 [chr14:75083773]  
omitted Genes: Rb1, Mir687, Lpar6  
omitted Genes: Itm2b, Med4, Nudt15  
omitted Genes: Sucla2, Gm4278, 5031414D18Rik  
omitted Genes: Lrrc63, Lcp1, Cpb2  
omitted Genes: Zc3h13, Slc25a30, Gm4285  
omitted Genes: Tpt1, Snora31, Gtf2f2  
omitted Genes: Kctd4, Gpalpp1, Nufip1  
omitted Genes: 4930444M15Rik, 1700108F19Rik, Dnajc15  
omitted Genes: Fam216b, Akap11, Mtrf1  
omitted Genes: Kbtbd7, Kbtbd6, Wbp4  
omitted Genes: Elf1, Sugt1, Lect1  
omitted Genes: 4930452G13Rik, Pcdh8, Gm10845

Fine-mapping Regions

| snp            | chr | pos (Mb) | pp         | group        | color  |
|----------------|-----|----------|------------|--------------|--------|
| chr14:77549688 | 14  | 77.54969 | 0.30787002 | Credible Set | purple |
| chr14:77673987 | 14  | 77.67399 | 0.48026350 | Credible Set | purple |
| chr14:78040815 | 14  | 78.04081 | 0.19112811 | Credible Set | purple |
| chr14:78597230 | 14  | 78.59723 | 0.02073838 | Credible Set | purple |

F34 Array, routine WBC differential eosinophil percentage

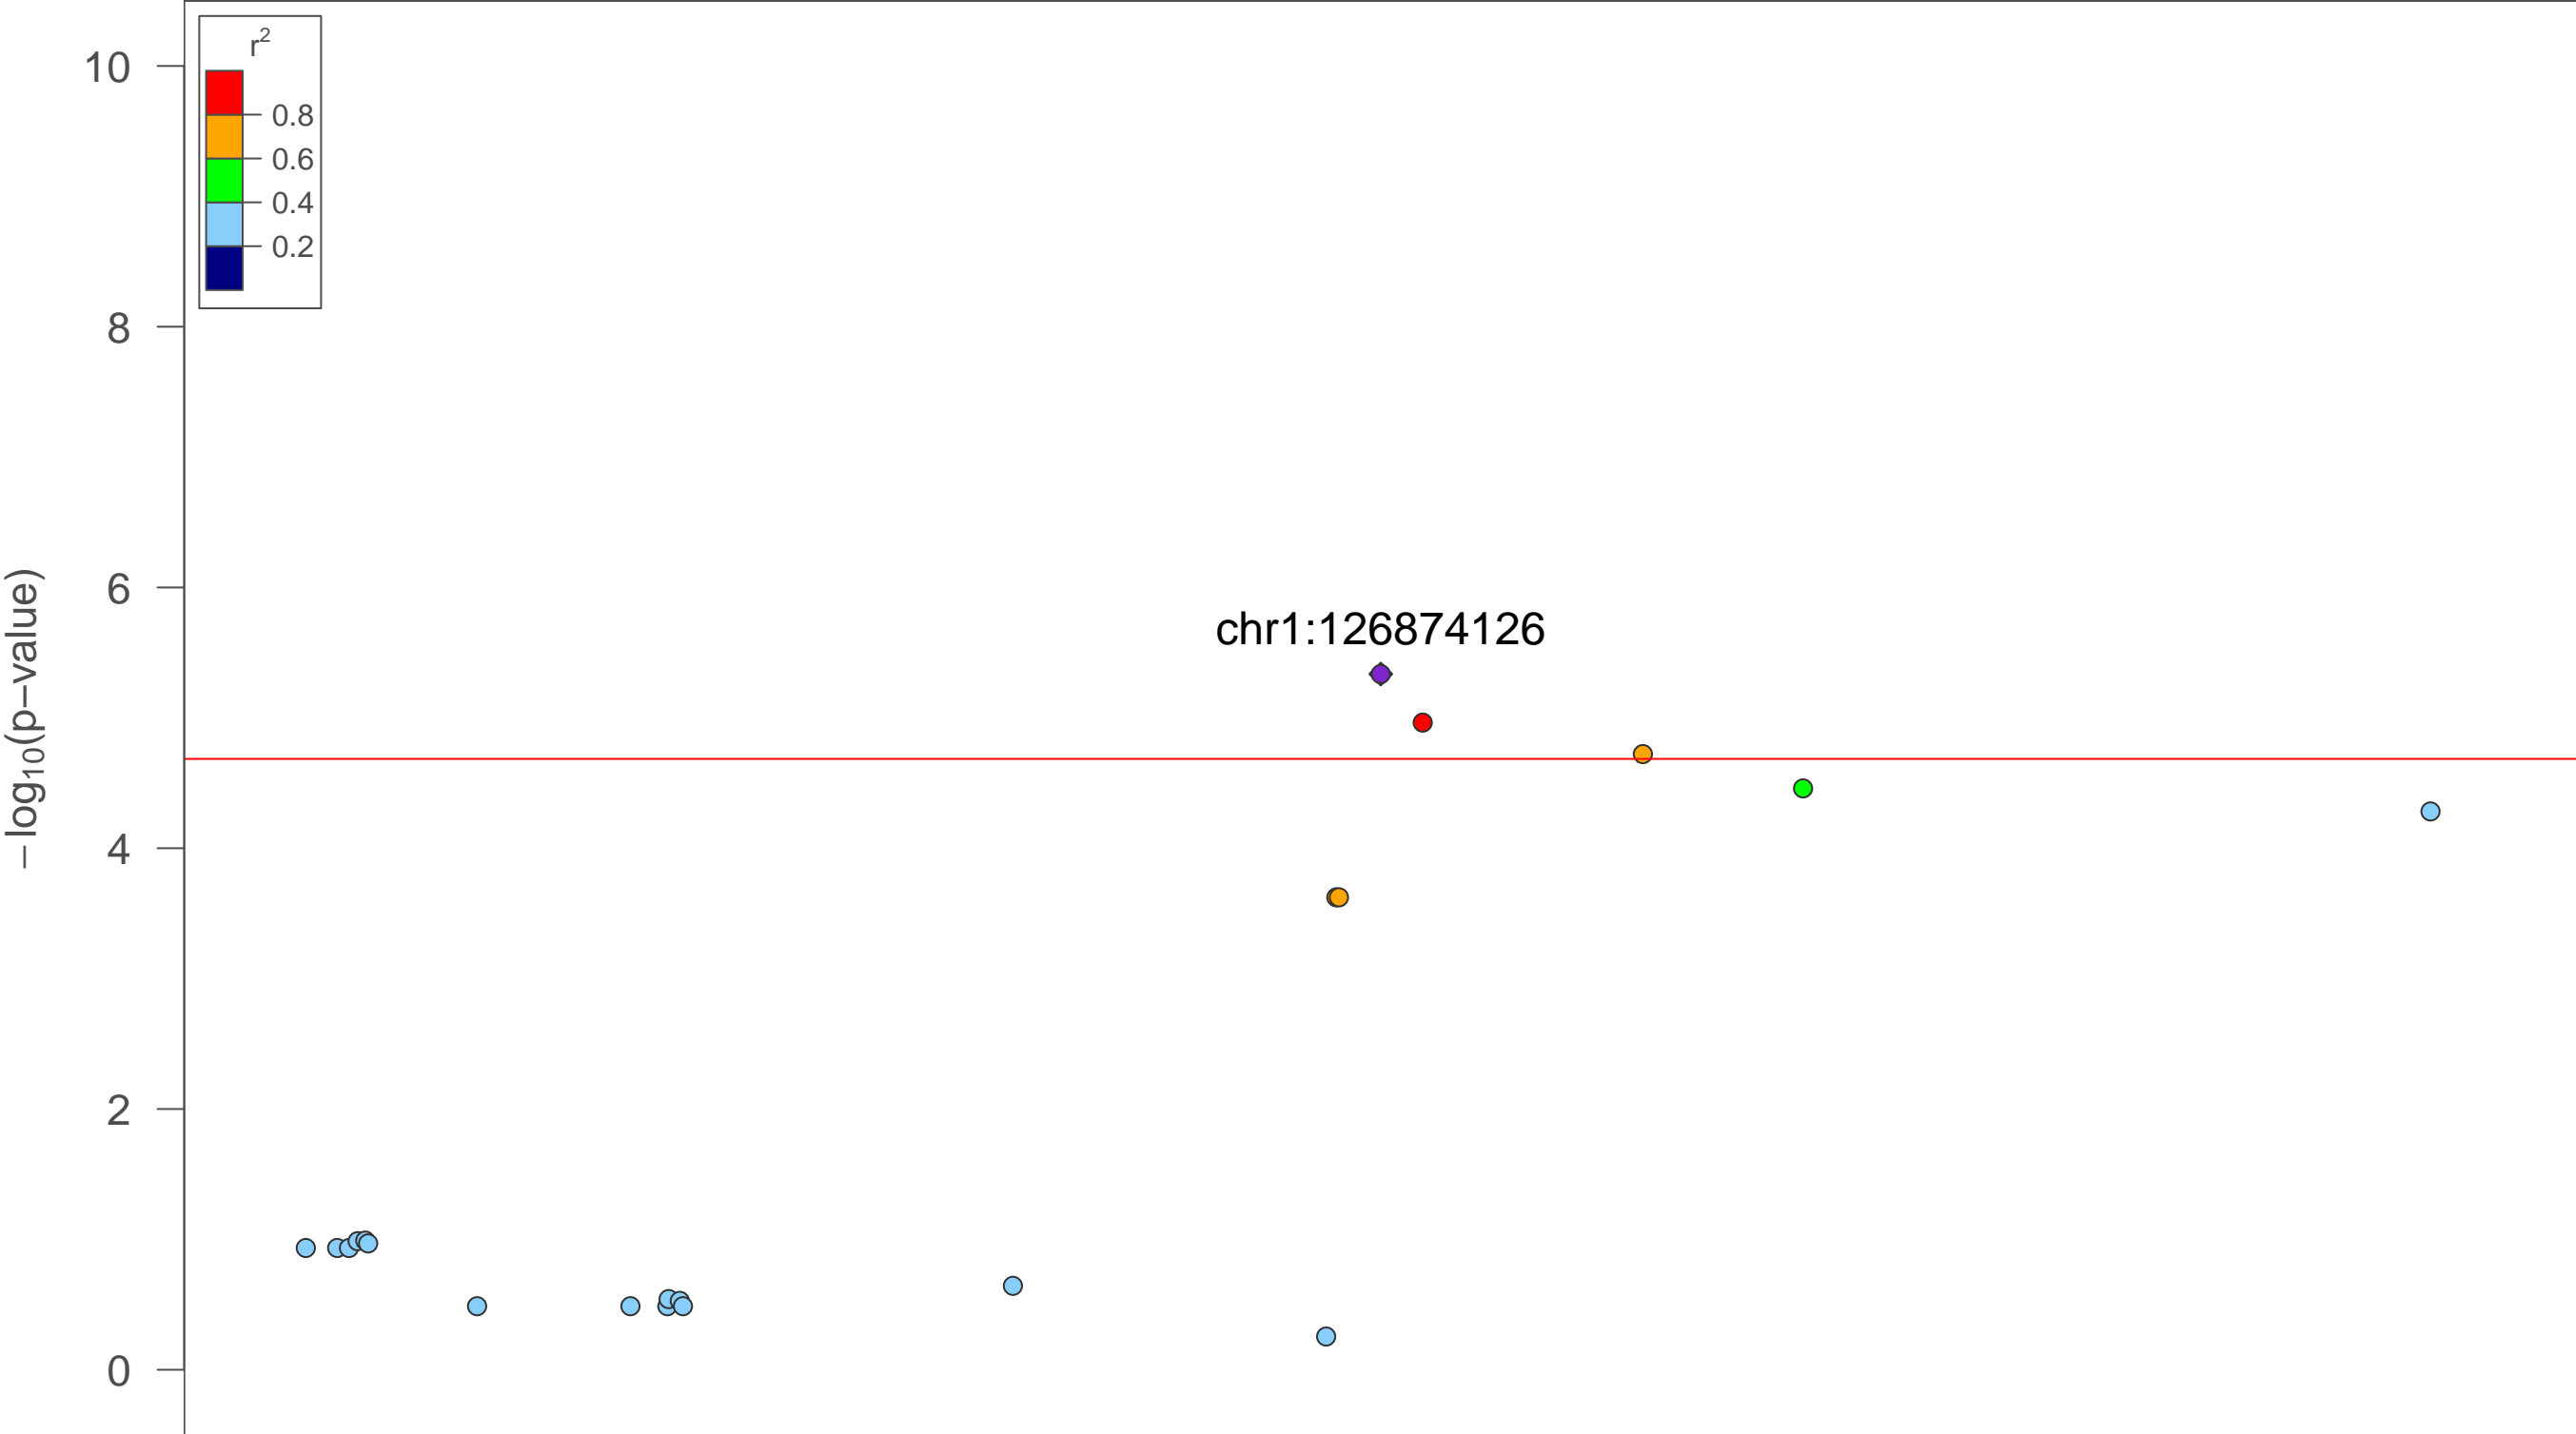

Credible Set

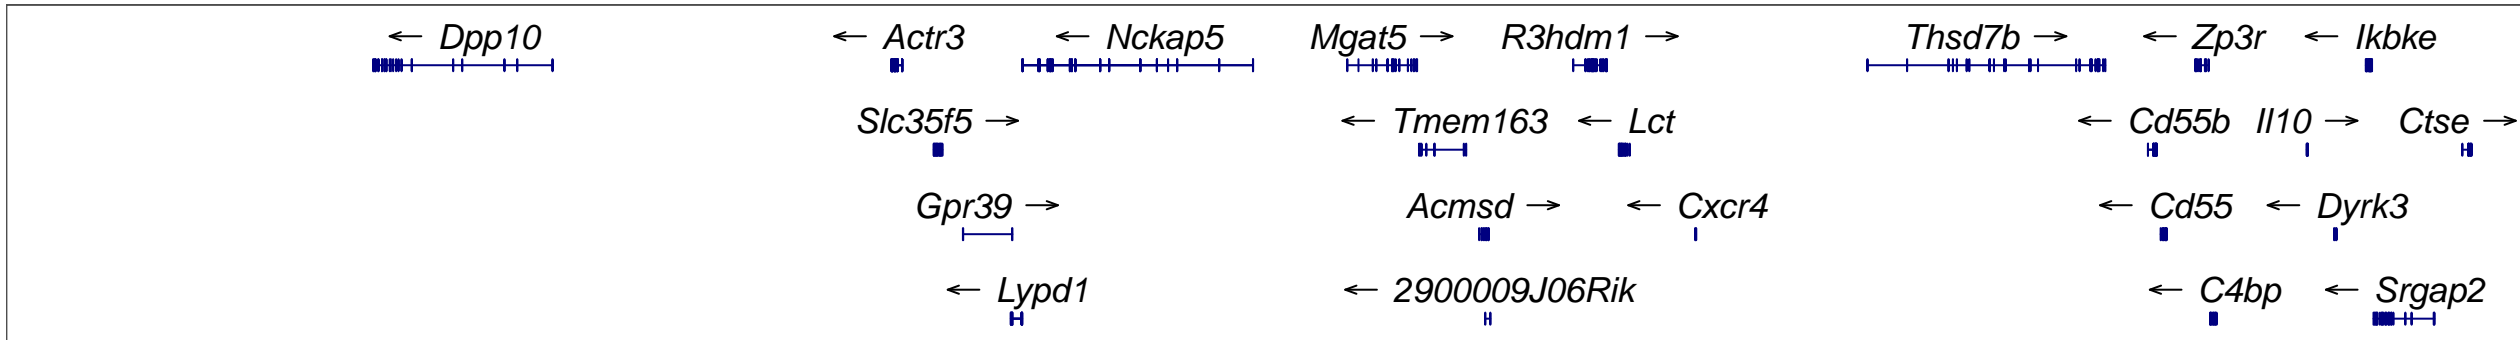

28 genes  
omitted

122

124

126

128

130

Position on chr1 (Mb)

date: Thu Oct 25 16:46:17 2018  
build: F34Array  
display range: chr1:121874126–131874126 [121874126–131874126]  
hilite range: 0 – 0 [ 0 – 0 ]  
reference SNP: chr1:126874126  
number of SNPs plotted: 22  
min P-value: 4.61E–6 [chr1:126874126]  
max P-value: 5.56E–1 [chr1:126645886]  
omitted Genes: Ccnt2, Map3k19, Rab3gap1  
omitted Genes: Zranb3, Mir128–1, Ubxn4  
omitted Genes: Mcm6, Dars, C4bp–ps1  
omitted Genes: Pfkfb2, Yod1, AA986860  
omitted Genes: Fcamr, Pigr, Fcmr  
omitted Genes: Il24, Il20, Il19  
omitted Genes: Mapkapk2, Eif2d, Rassf5  
omitted Genes: Fam72a, Avpr1b, Rab7b  
omitted Genes: Slc26a9, Pm20d1, Slc41a1  
omitted Genes: Rab29

Fine-mapping Regions

| snp            | chr | pos (Mb) | pp       | group        | color  |
|----------------|-----|----------|----------|--------------|--------|
| chr1:126874126 | 1   | 126.8741 | 0.694067 | Credible Set | purple |
| chr1:127049404 | 1   | 127.0494 | 0.305933 | Credible Set | purple |



# F34 Array, routine WBC differential large unstained cell number

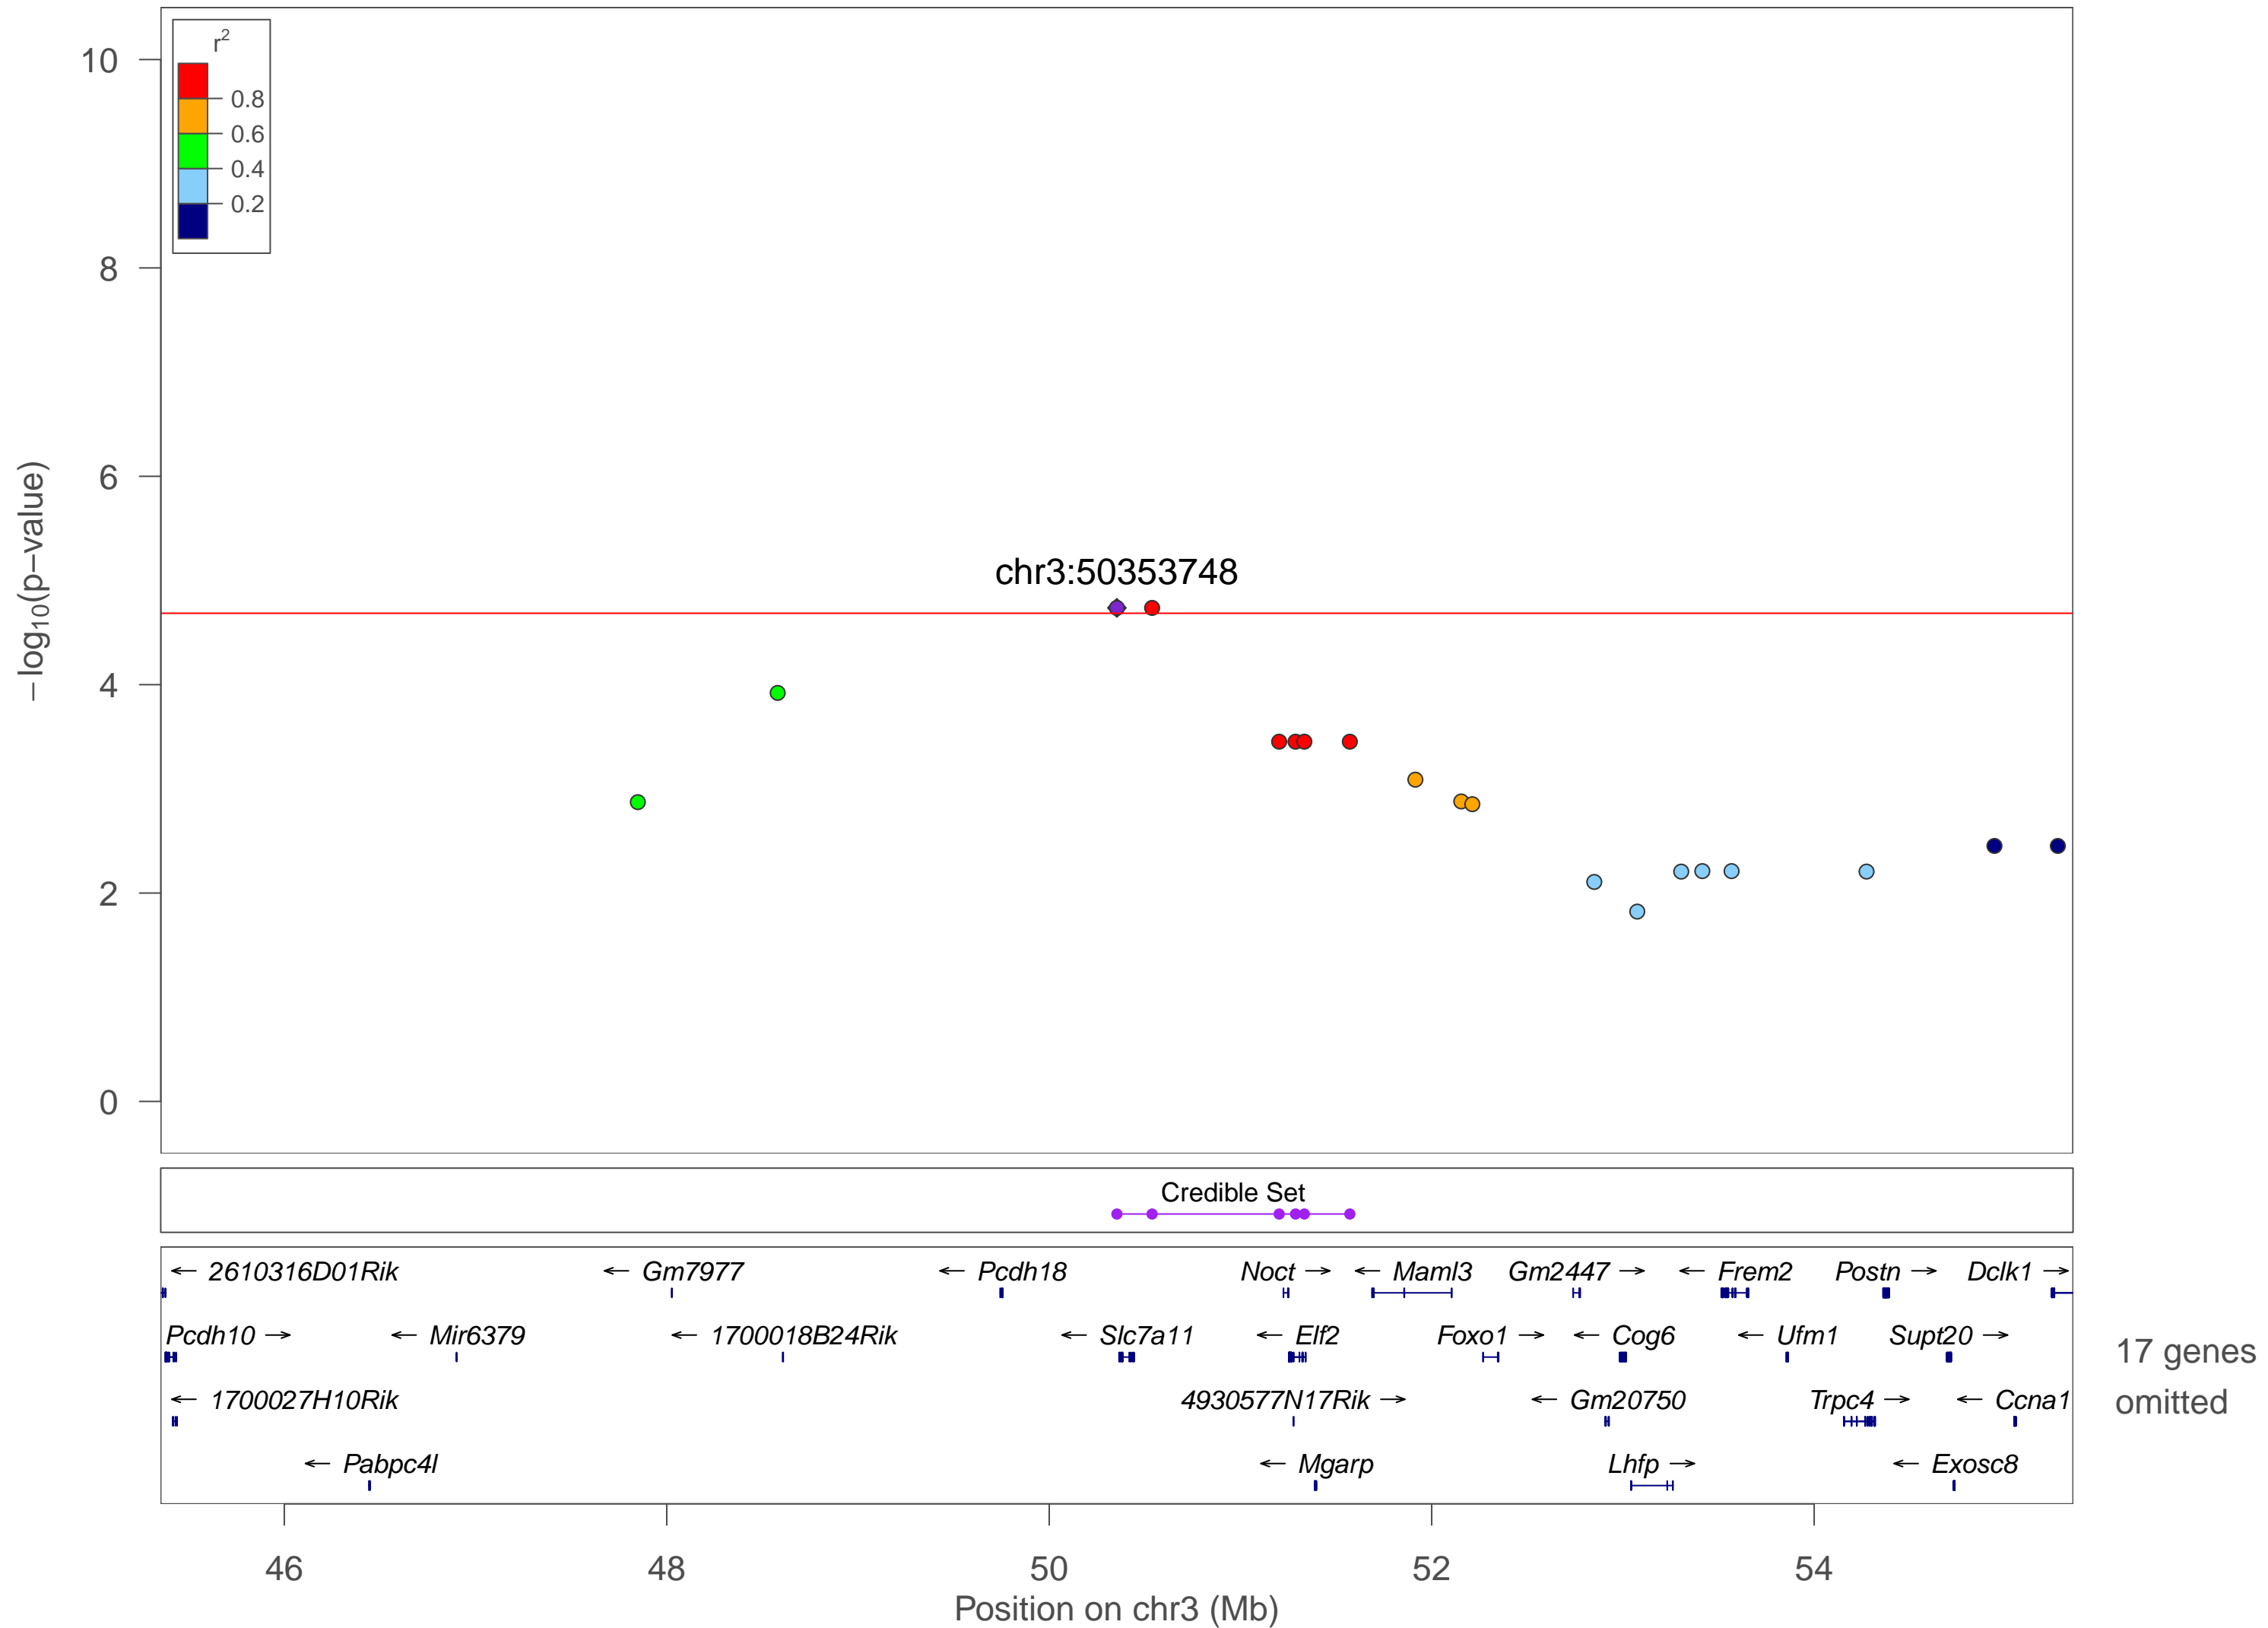

date: Thu Oct 25 16:46:24 2018

build: F34Array

display range: chr3:45353748–55353748 [45353748–55353748]

hilite range: 0 – 0 [ 0 – 0 ]

reference SNP: chr3:50353748

number of SNPs plotted: 20

min P-value: 1.83E–5 [chr3:50353748]

max P-value: 1.51E–2 [chr3:53074908]

omitted Genes: Ndufc1, Naa15, Rab33b

omitted Genes: Setd7, 5031434O11Rik, Mgst2

omitted Genes: Nhlrc3, Proser1, Stoml3

omitted Genes: Alg5, Smad9, Rfxap

omitted Genes: Sertm1, 4931419H13Rik, Spg20

omitted Genes: Ccdc169, Sohlh2

Fine-mapping Regions

| snp           | chr | pos (Mb) | pp         | group        | color  |
|---------------|-----|----------|------------|--------------|--------|
| chr3:50353748 | 3   | 50.35375 | 0.44546368 | Credible Set | purple |
| chr3:50537878 | 3   | 50.53788 | 0.44546368 | Credible Set | purple |
| chr3:51202322 | 3   | 51.20232 | 0.02726816 | Credible Set | purple |
| chr3:51287862 | 3   | 51.28786 | 0.02726816 | Credible Set | purple |
| chr3:51333971 | 3   | 51.33397 | 0.02726816 | Credible Set | purple |
| chr3:51571920 | 3   | 51.57192 | 0.02726816 | Credible Set | purple |

# F34 Array, retic parameters reticulocyte percent

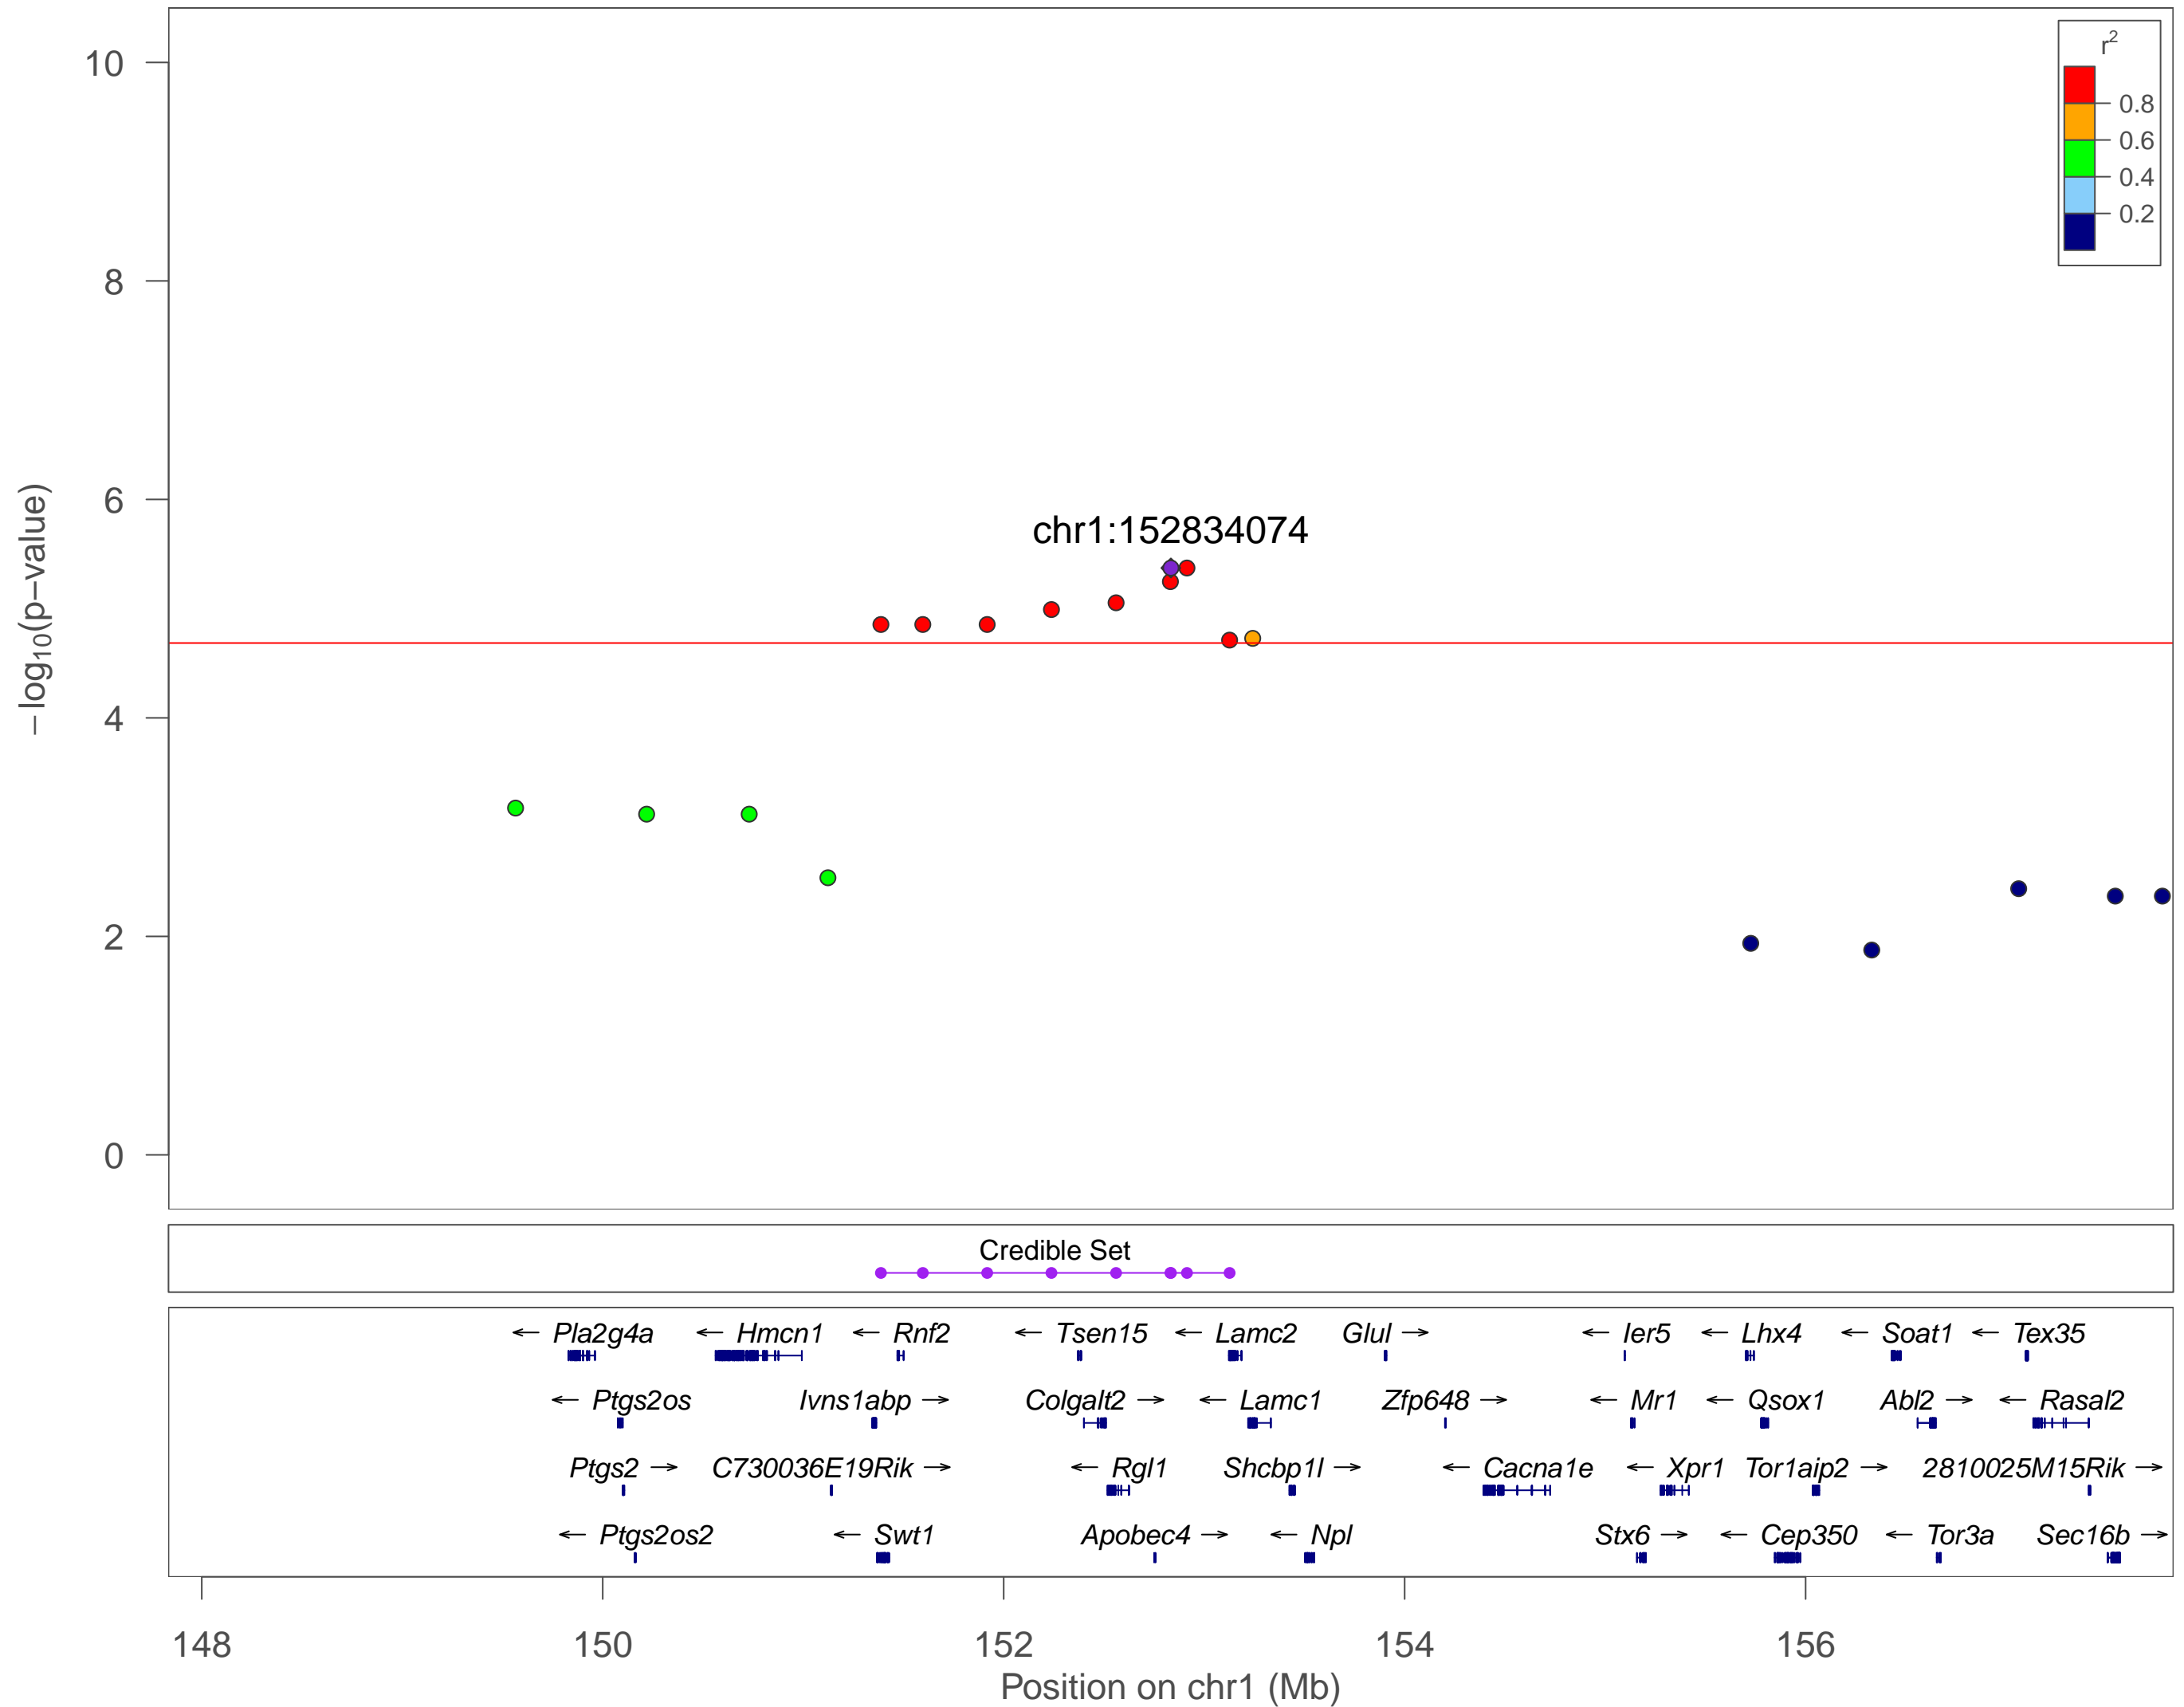

date: Thu Oct 25 16:46:31 2018  
build: F34Array  
display range: chr1:147834074–157834074 [147834074–157834074]  
hilite range: 0 – 0 [ 0 – 0 ]  
reference SNP: chr1:152834074  
number of SNPs plotted: 20  
min P-value: 4.24E–6 [chr1:152834074]  
max P-value: 1.33E–2 [chr1:156329965]  
omitted Genes: Pdc, 2310030A07Rik, BC003331  
omitted Genes: Tpr, Prg4, Trmt1l  
omitted Genes: Mir7682, Fam129a, Edem3  
omitted Genes: 1700025G04Rik, Arpc5, Ncf2  
omitted Genes: Smg7, Nmnat2, E330020D12Rik  
omitted Genes: Dhx9, Rgs8, C230024C17Rik  
omitted Genes: Rgs16, Rnasel, Rgs1  
omitted Genes: Teddm2, Teddm1b, Teddm1a  
omitted Genes: Mir8114, 4930452N14Rik, 4930532M18Rik  
omitted Genes: Gm5532, Acbd6, Tor1aip1  
omitted Genes: Fam163a, Tdrd5, Nphs2  
omitted Genes: Fam20b, Ralgps2, Angptl1  
omitted Genes: BC026585

Fine-mapping Regions

| snp            | chr | pos (Mb) | pp         | group        | color  |
|----------------|-----|----------|------------|--------------|--------|
| chr1:151387651 | 1   | 151.3877 | 0.06561180 | Credible Set | purple |
| chr1:151596615 | 1   | 151.5966 | 0.06561180 | Credible Set | purple |
| chr1:151917608 | 1   | 151.9176 | 0.06561180 | Credible Set | purple |
| chr1:152238182 | 1   | 152.2382 | 0.08858970 | Credible Set | purple |
| chr1:152560587 | 1   | 152.5606 | 0.10155521 | Credible Set | purple |
| chr1:152831634 | 1   | 152.8316 | 0.15553687 | Credible Set | purple |
| chr1:152834074 | 1   | 152.8341 | 0.20476992 | Credible Set | purple |
| chr1:152914150 | 1   | 152.9142 | 0.20476992 | Credible Set | purple |
| chr1:153126949 | 1   | 153.1269 | 0.04794298 | Credible Set | purple |

# F34 Array, retic parameters concentration of hemoglobin in reticulocytes

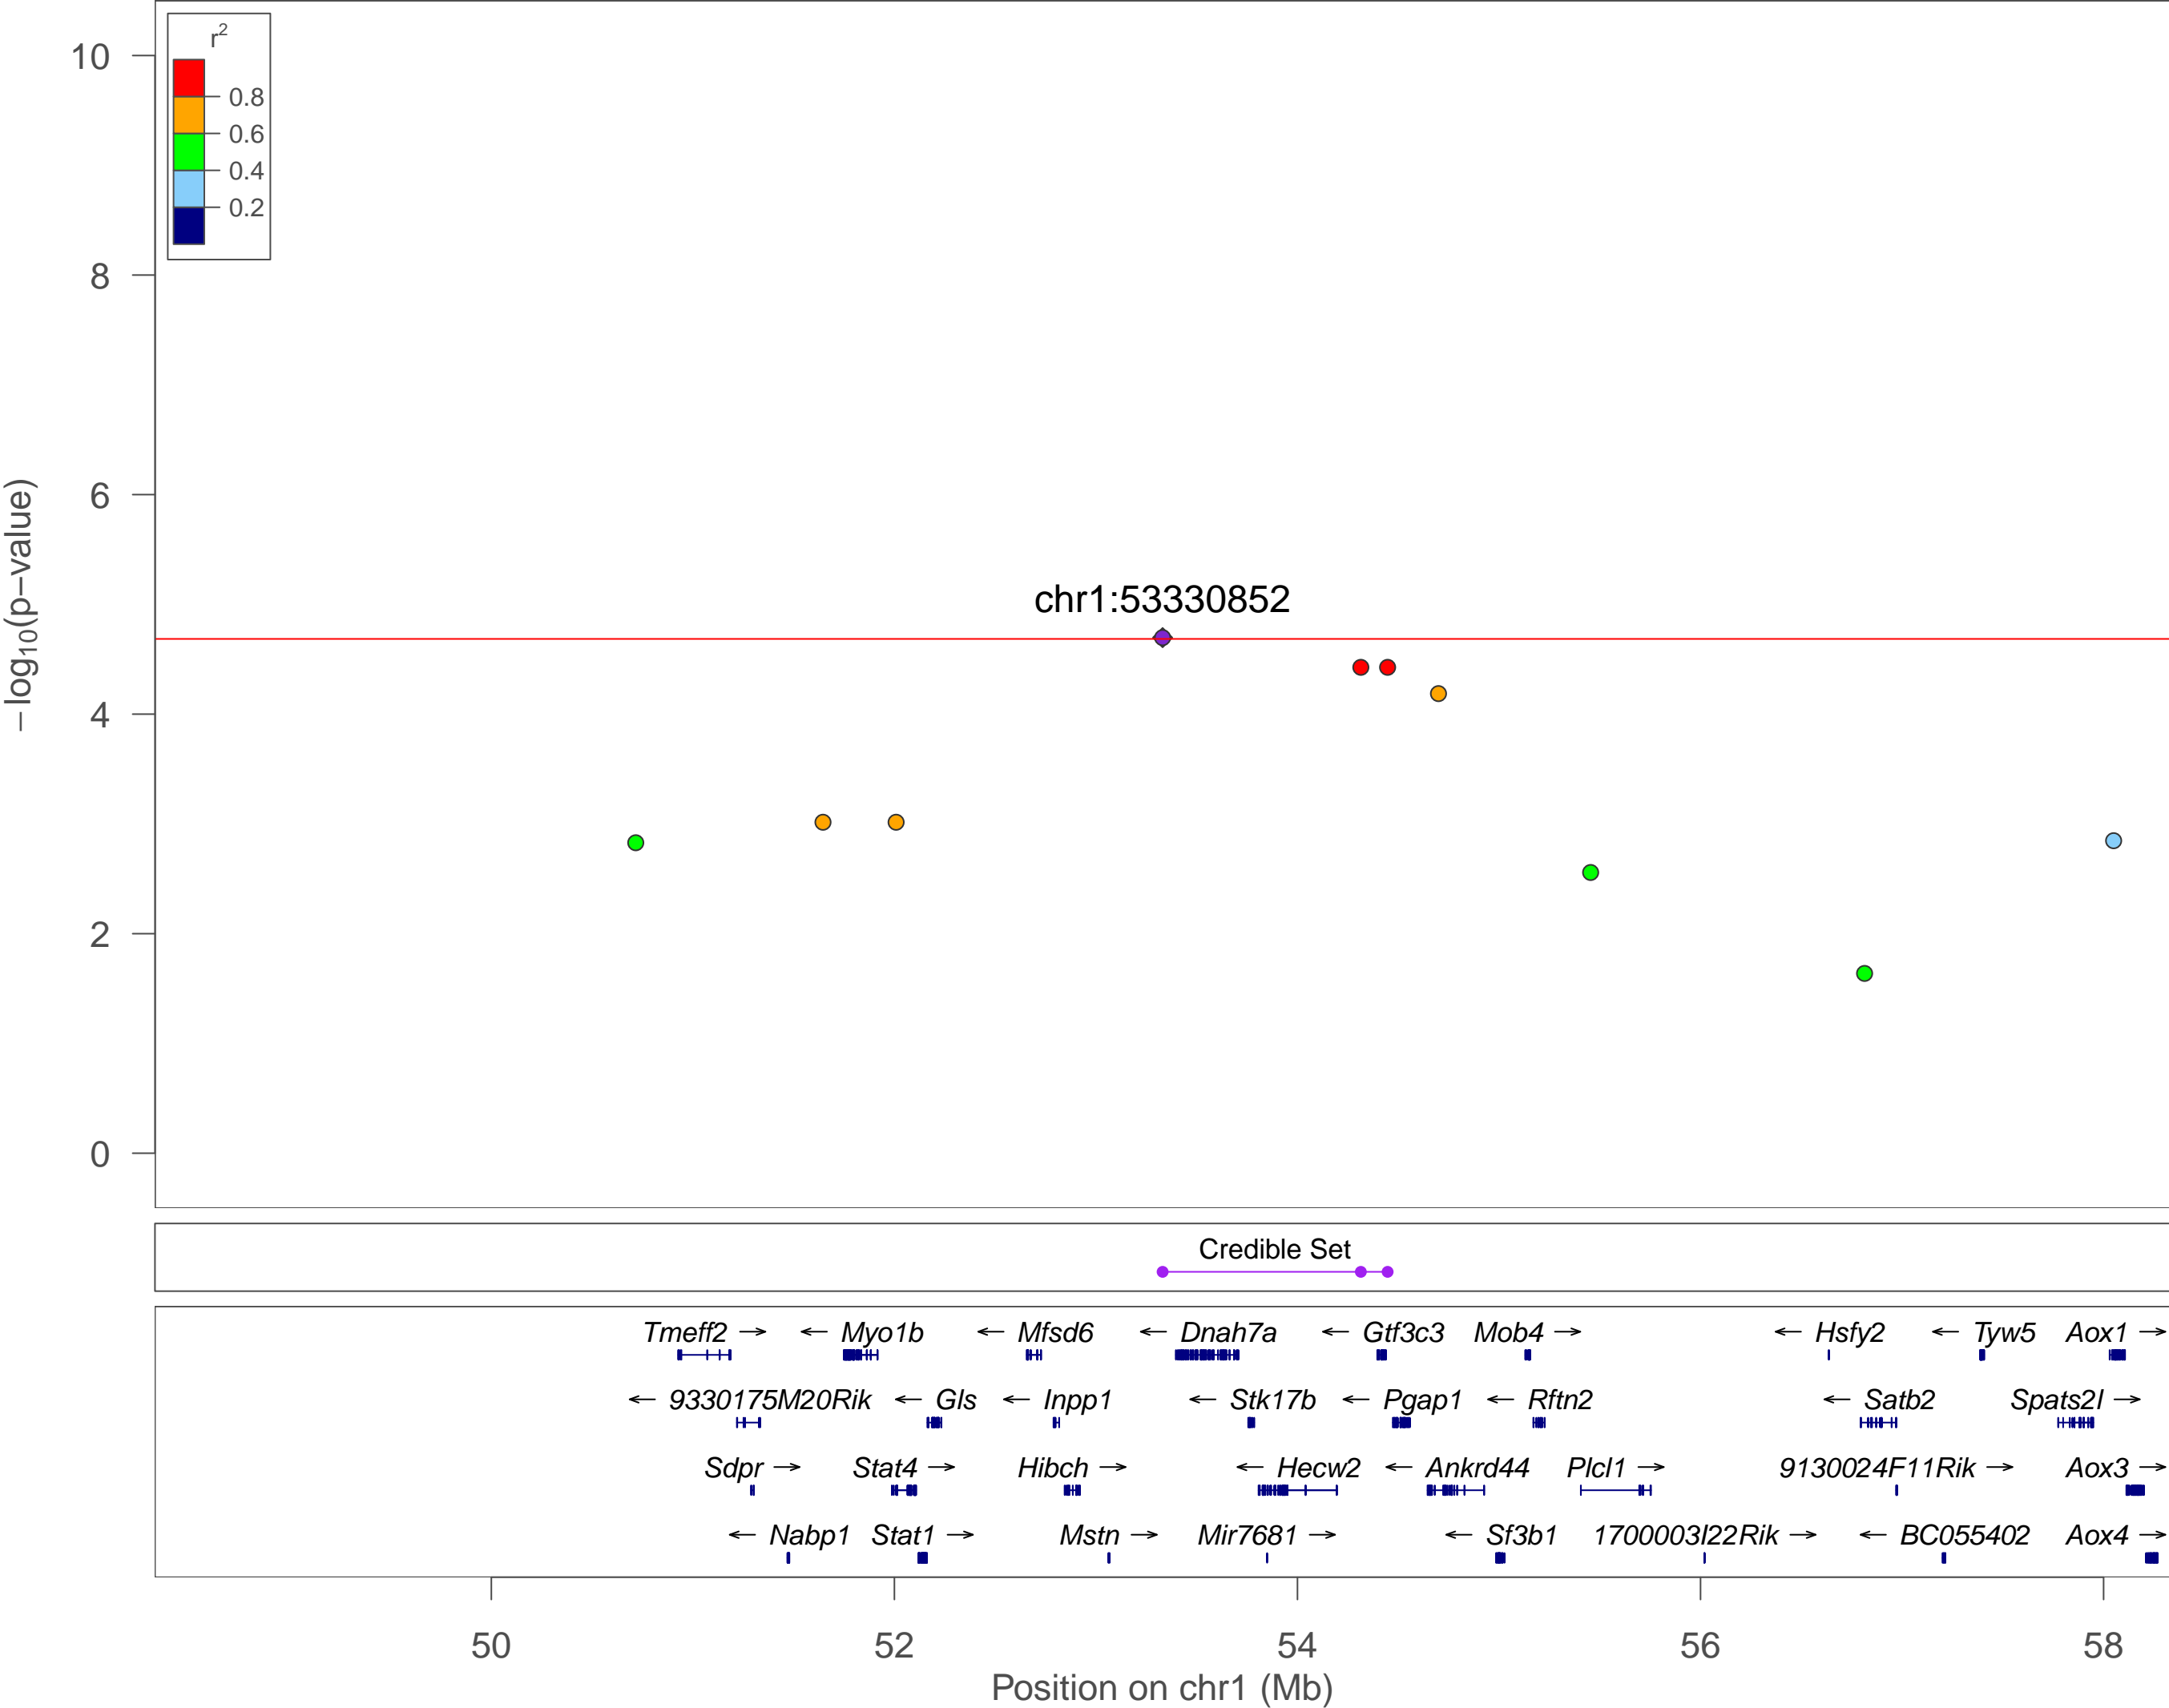

date: Thu Oct 25 16:46:38 2018  
build: F34Array  
display range: chr1:48330852–58330852 [48330852–58330852]  
hilite range: 0 – 0 [ 0 – 0 ]  
reference SNP: chr1:53330852  
number of SNPs plotted: 11  
min P-value: 2.01E–5 [chr1:53330852]  
max P-value: 2.3E–2 [chr1:56814006]  
omitted Genes: Nab1, Tmem194b, 1700019D03Rik  
omitted Genes: 1700019A02Rik, Pms1, Ormdl1  
omitted Genes: Osgepl1, Asnsd1, Ccdc150  
omitted Genes: Coq10b, Hspd1, Hspe1  
omitted Genes: Mars2, Boll, Gm6644  
omitted Genes: 9130227L01Rik, 4930558J18Rik, 1700066M21Rik  
omitted Genes: 9430016H08Rik, Kctd18, Sgol2a  
omitted Genes: Aox2



Fine-mapping Regions

| snp           | chr | pos (Mb) | pp        | group        | color  |
|---------------|-----|----------|-----------|--------------|--------|
| chr1:53330852 | 1   | 53.33085 | 0.4747306 | Credible Set | purple |
| chr1:54314429 | 1   | 54.31443 | 0.2626347 | Credible Set | purple |
| chr1:54447274 | 1   | 54.44727 | 0.2626347 | Credible Set | purple |

# F34 Array, retic parameters concentration of hemoglobin in reticulocytes

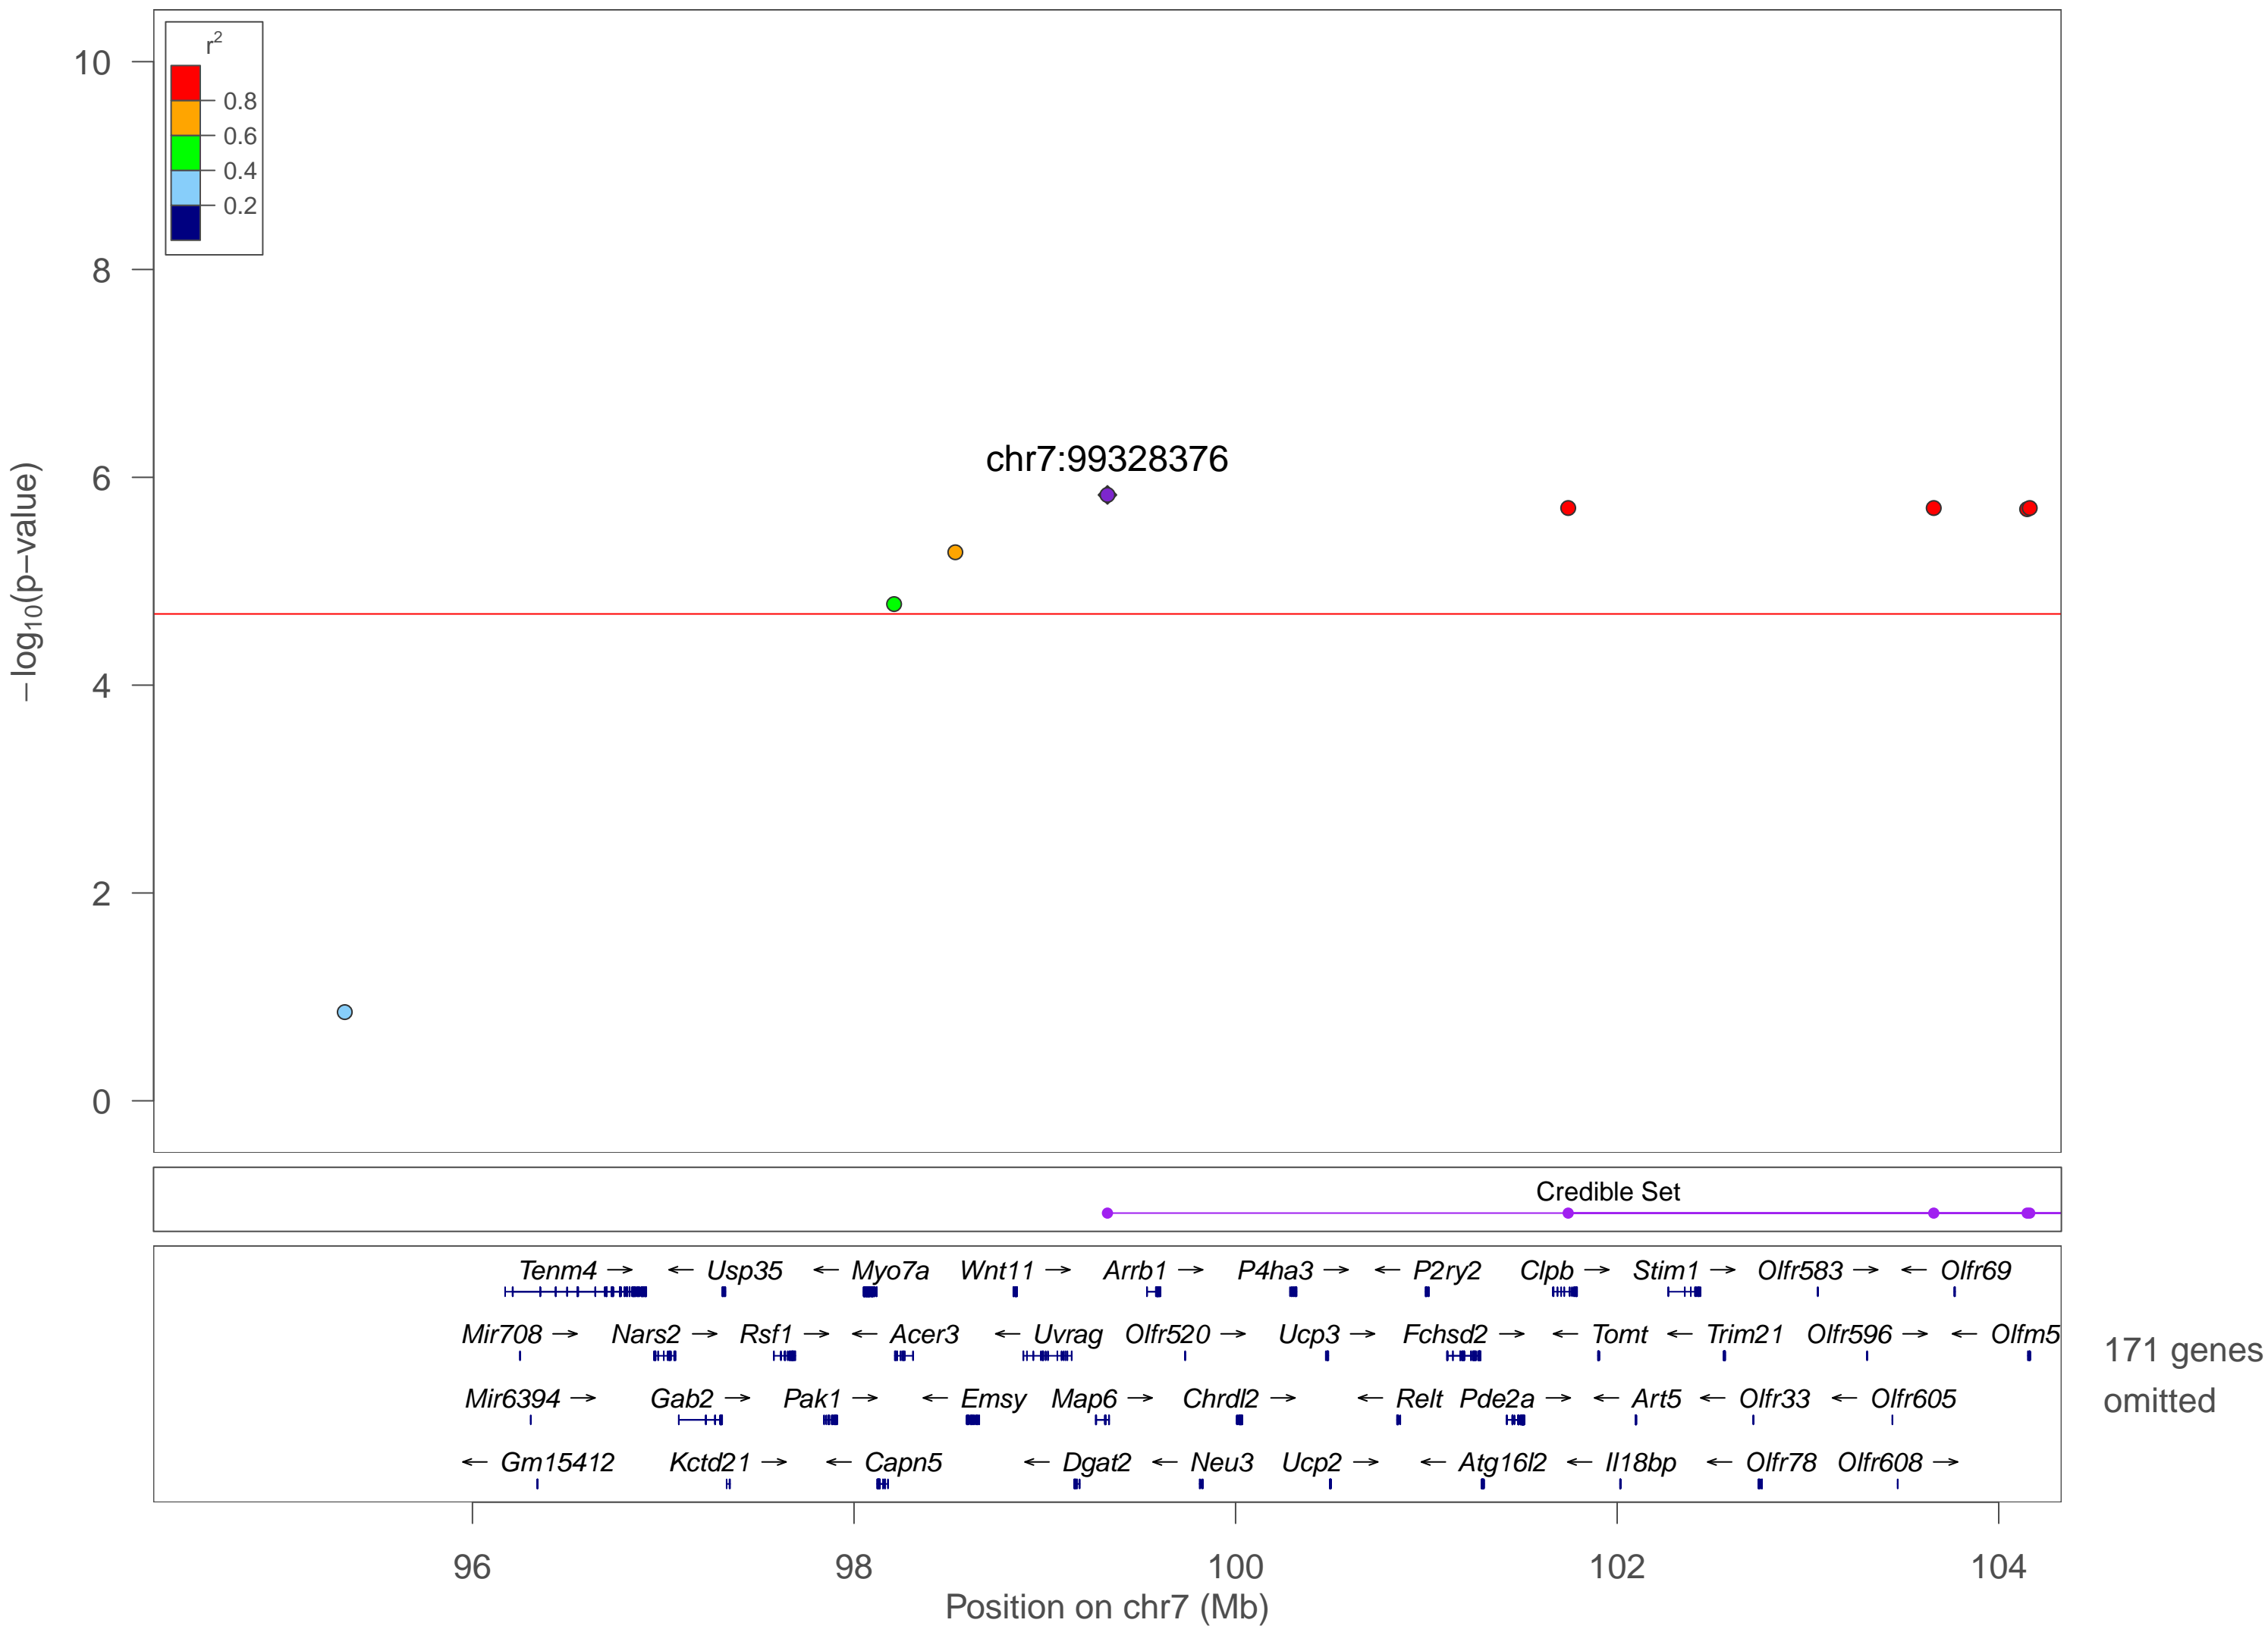

date: Thu Oct 25 16:46:56 2018

build: F34Array

display range: chr7:94328376–104328376 [94328376–104328376]

hilite range: 0 – 0 [ 0 – 0 ]

reference SNP: chr7:99328376

number of SNPs plotted: 9

min P-value: 1.48E–6 [chr7:99328376]

max P-value: 1.4E–1 [chr7:95330810]

omitted Genes: Gm15413, Alg8, Ndufc2

omitted Genes: Thrsp, Kctd14, Ints4

omitted Genes: Aamdc, Rsf1os1, Clns1a

omitted Genes: Aqp11, Gdpd4, Omp

omitted Genes: Gm16938, B3gnt6, Tsku

omitted Genes: Gucy2d, Lrrc32, Prkrir

omitted Genes: Mogat2, Gm26705, Serpinh1

omitted Genes: Gdpd5, Khlh35, Rps3

omitted Genes: Snord15b, Snord15a, Mir326

omitted Genes: Tpbgl, Slco2b1, Olfr521

omitted Genes: Spcs2, Xrra1, Rnf169

omitted Genes: Pold3, Lipt2, Kcne3

omitted Genes: Pgm2l1, Gpx2-ps1, Ppme1

omitted Genes: C2cd3, Dnajb13, Coa4

omitted Genes: Mrpl48, Rab6a, Plekhh1

omitted Genes: Fam168a, Arhgef17, Mir3102

omitted Genes: P2ry6, Stard10, Arap1

omitted Genes: Mir139, Art2a-ps, Art2b

omitted Genes: Phox2a, Inpp1, Folr2

omitted Genes: Folr1, Anapc15, Lamtor1

omitted Genes: Lrrc51, Numa1, Rnf121

omitted Genes: Xndc1, Xntrpc, Trpc2

omitted Genes: Art1, Chrna10, Nup98

omitted Genes: Pgap2, Rhog, Rrm1

omitted Genes: Olfr543, Olfr544, Olfr545

omitted Genes: Olfr547, Olfr549, Olfr550

omitted Genes: Olfr551, Olfr552, Olfr553

omitted Genes: Olfr554, Olfr555, Olfr556

omitted Genes: Trim68, Olfr557, Olfr558

omitted Genes: Olfr559, Olfr560, Olfr561

omitted Genes: Olfr564, Olfr566, Olfr568

omitted Genes: Olfr569, Olfr570, Olfr571

Make more plots at <http://csg.sph.umich.edu/locuszoom/>

Fine-mapping Regions

| snp            | chr | pos (Mb)  | pp        | group        | color  |
|----------------|-----|-----------|-----------|--------------|--------|
| chr7:99328376  | 7   | 99.32838  | 0.2096164 | Credible Set | purple |
| chr7:101743401 | 7   | 101.74340 | 0.1586110 | Credible Set | purple |
| chr7:103659355 | 7   | 103.65936 | 0.1586110 | Credible Set | purple |
| chr7:104149022 | 7   | 104.14902 | 0.1547811 | Credible Set | purple |
| chr7:104162444 | 7   | 104.16244 | 0.1586110 | Credible Set | purple |
| chr7:104581631 | 7   | 104.58163 | 0.1597694 | Credible Set | purple |

# F34 Array, retic parameters concentration of hemoglobin in reticulocytes

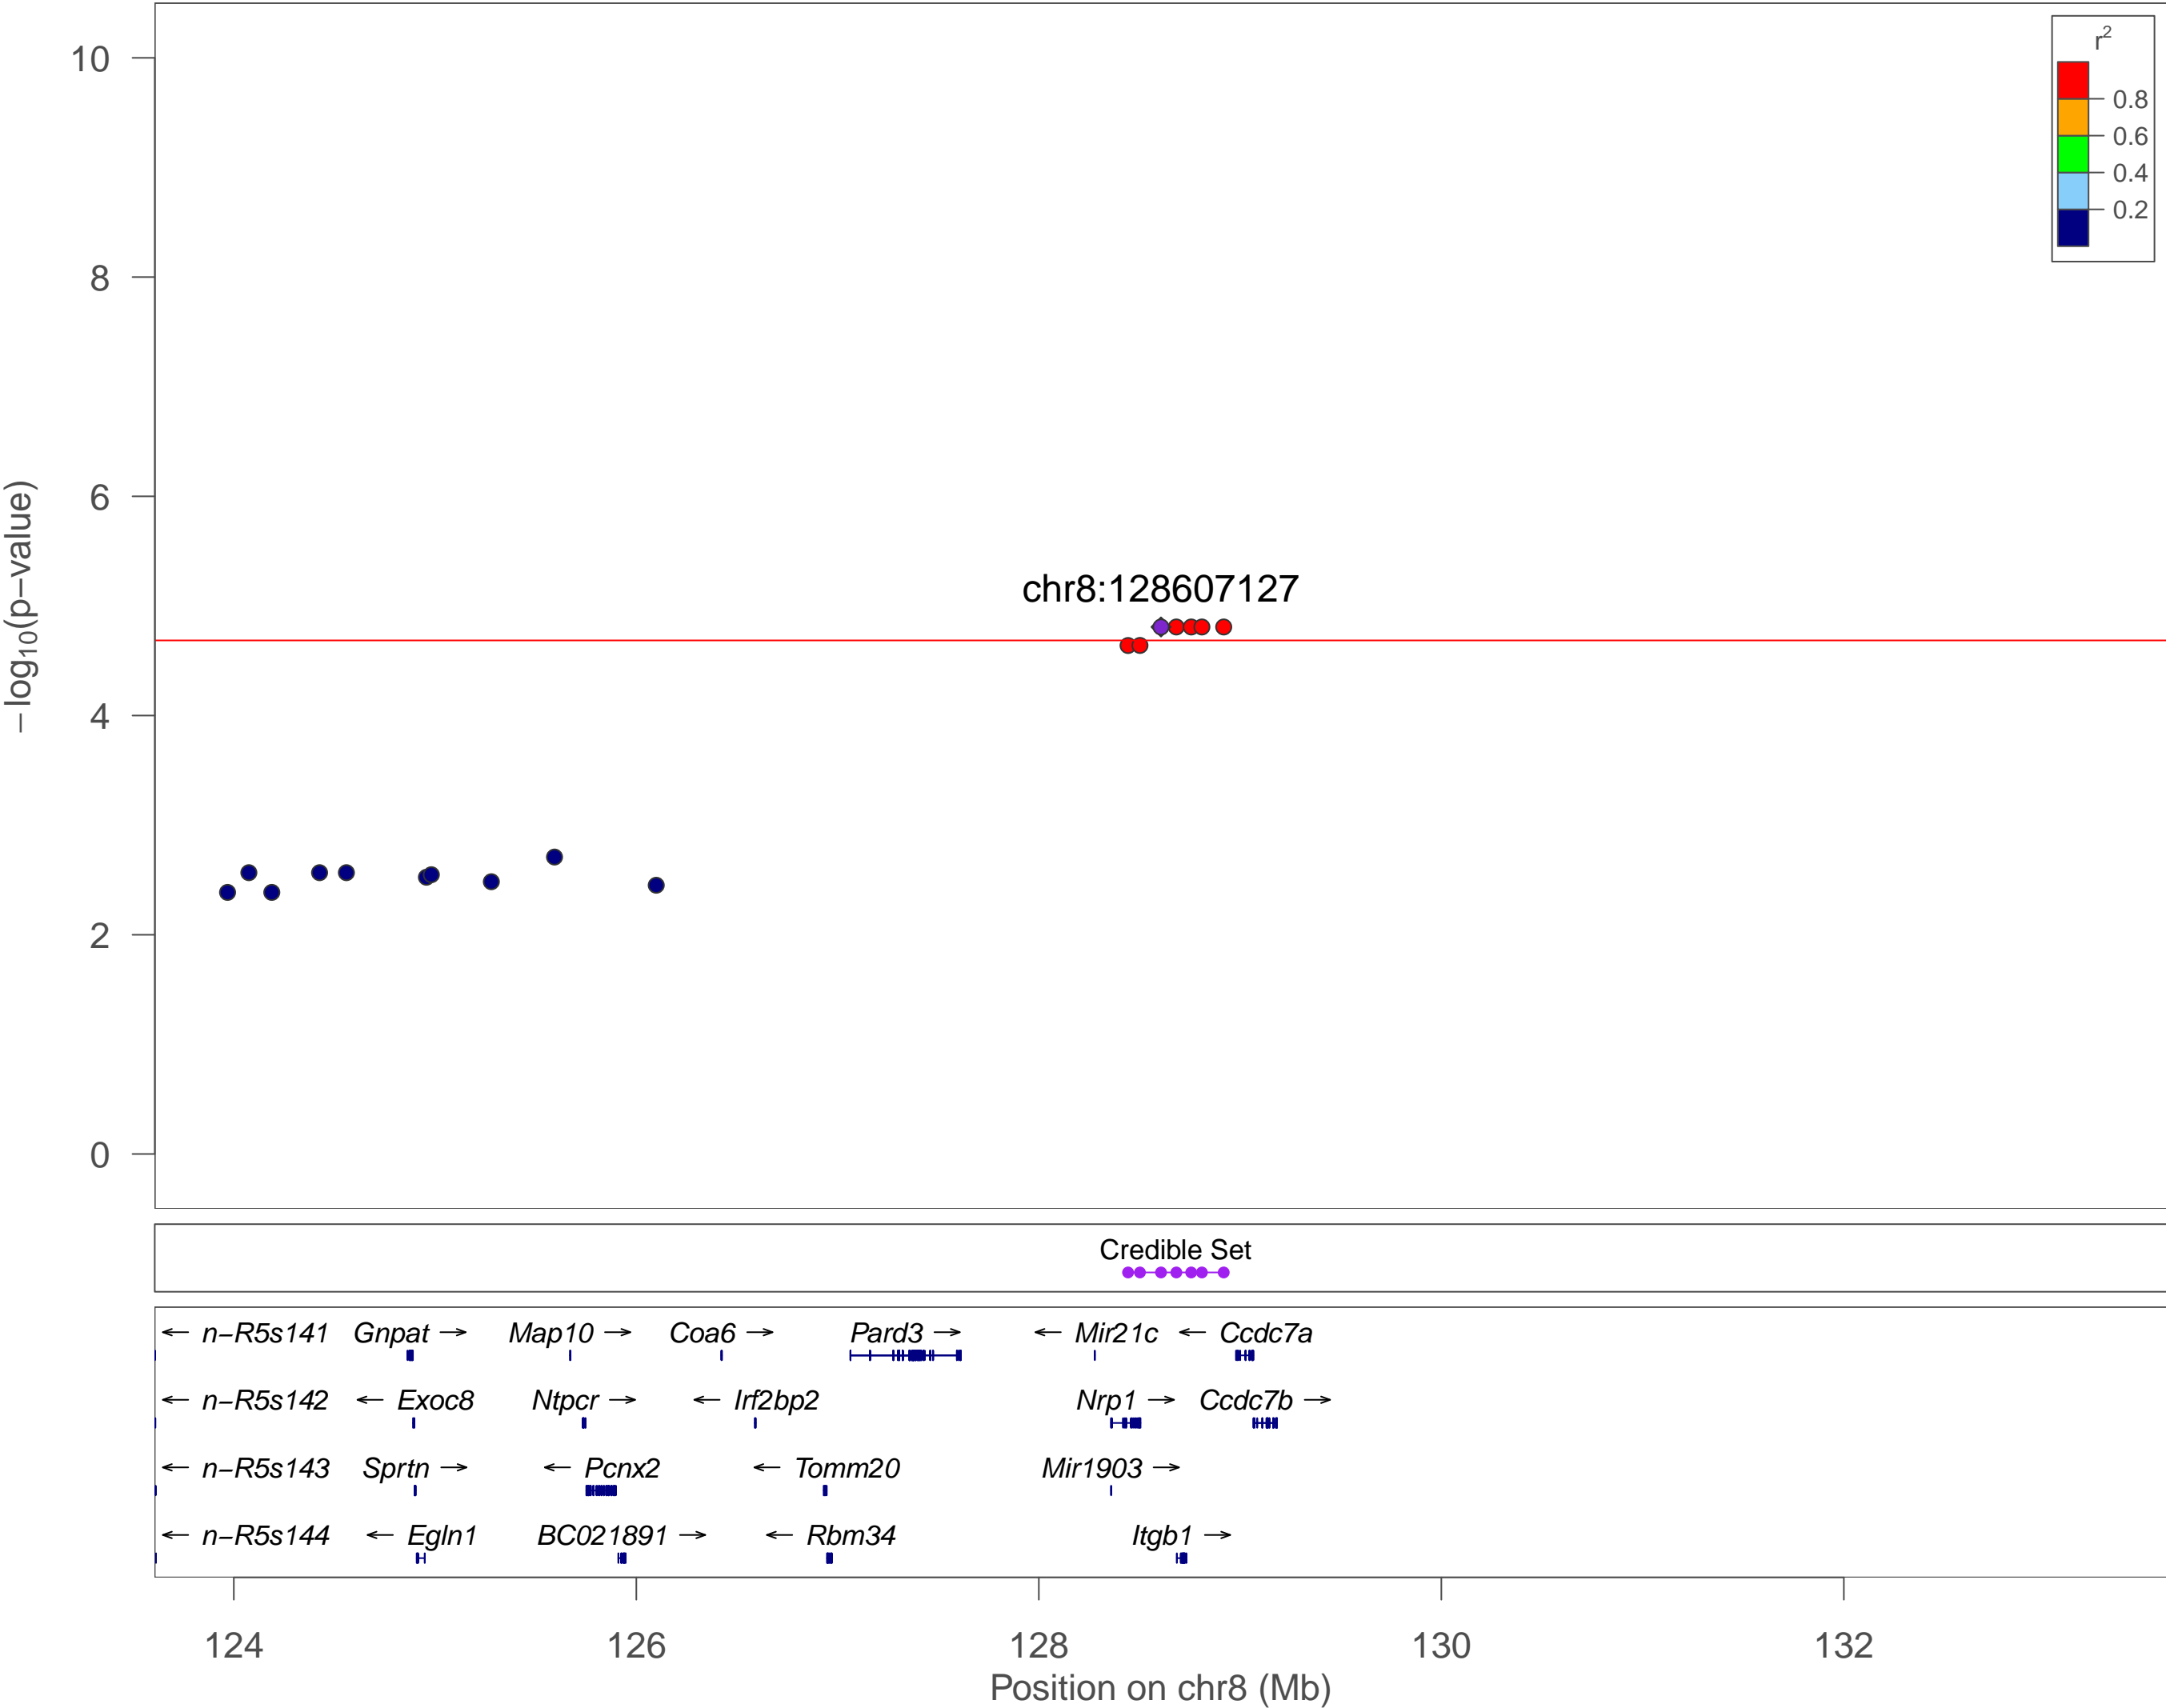

date: Thu Oct 25 16:47:03 2018  
build: F34Array  
display range: chr8:123607127–133607127 [123607127–133607127]  
hilite range: 0 – 0 [ 0 – 0 ]  
reference SNP: chr8:128607127  
number of SNPs plotted: 18  
min P-value: 1.56E–5 [chr8:128607127]  
max P-value: 4.1E–3 [chr8:123968866]  
omitted Genes: Gm25212, n-R5s146, Gm22291  
omitted Genes: Gm23284, n-R5s149, Rhou  
omitted Genes: 6030466F02Rik, Rab4a, Ccsap  
omitted Genes: Acta1, Nup133, Abcb10  
omitted Genes: Taf5l, Mir1967, Urb2  
omitted Genes: Galnt2, Pgbd5, Cog2  
omitted Genes: Agt, Capn9, 2310022B05Rik  
omitted Genes: Ttc13, Arv1, Fam89a  
omitted Genes: Trim67, 2810004N23Rik, Tsnax  
omitted Genes: Disc1, Sipa1l2, 4930567H12Rik  
omitted Genes: Kcnk1, Slc35f3, Gm17296  
omitted Genes: 2610044O15Rik8

Fine-mapping Regions

| snp            | chr | pos (Mb) | pp        | group        | color  |
|----------------|-----|----------|-----------|--------------|--------|
| chr8:128443469 | 8   | 128.4435 | 0.1081470 | Credible Set | purple |
| chr8:128502425 | 8   | 128.5024 | 0.1083470 | Credible Set | purple |
| chr8:128607127 | 8   | 128.6071 | 0.1567012 | Credible Set | purple |
| chr8:128683251 | 8   | 128.6833 | 0.1567012 | Credible Set | purple |
| chr8:128757217 | 8   | 128.7572 | 0.1567012 | Credible Set | purple |
| chr8:128810304 | 8   | 128.8103 | 0.1567012 | Credible Set | purple |
| chr8:128918665 | 8   | 128.9187 | 0.1567012 | Credible Set | purple |

F34 Array, retic parameters mean reticulocyte volume

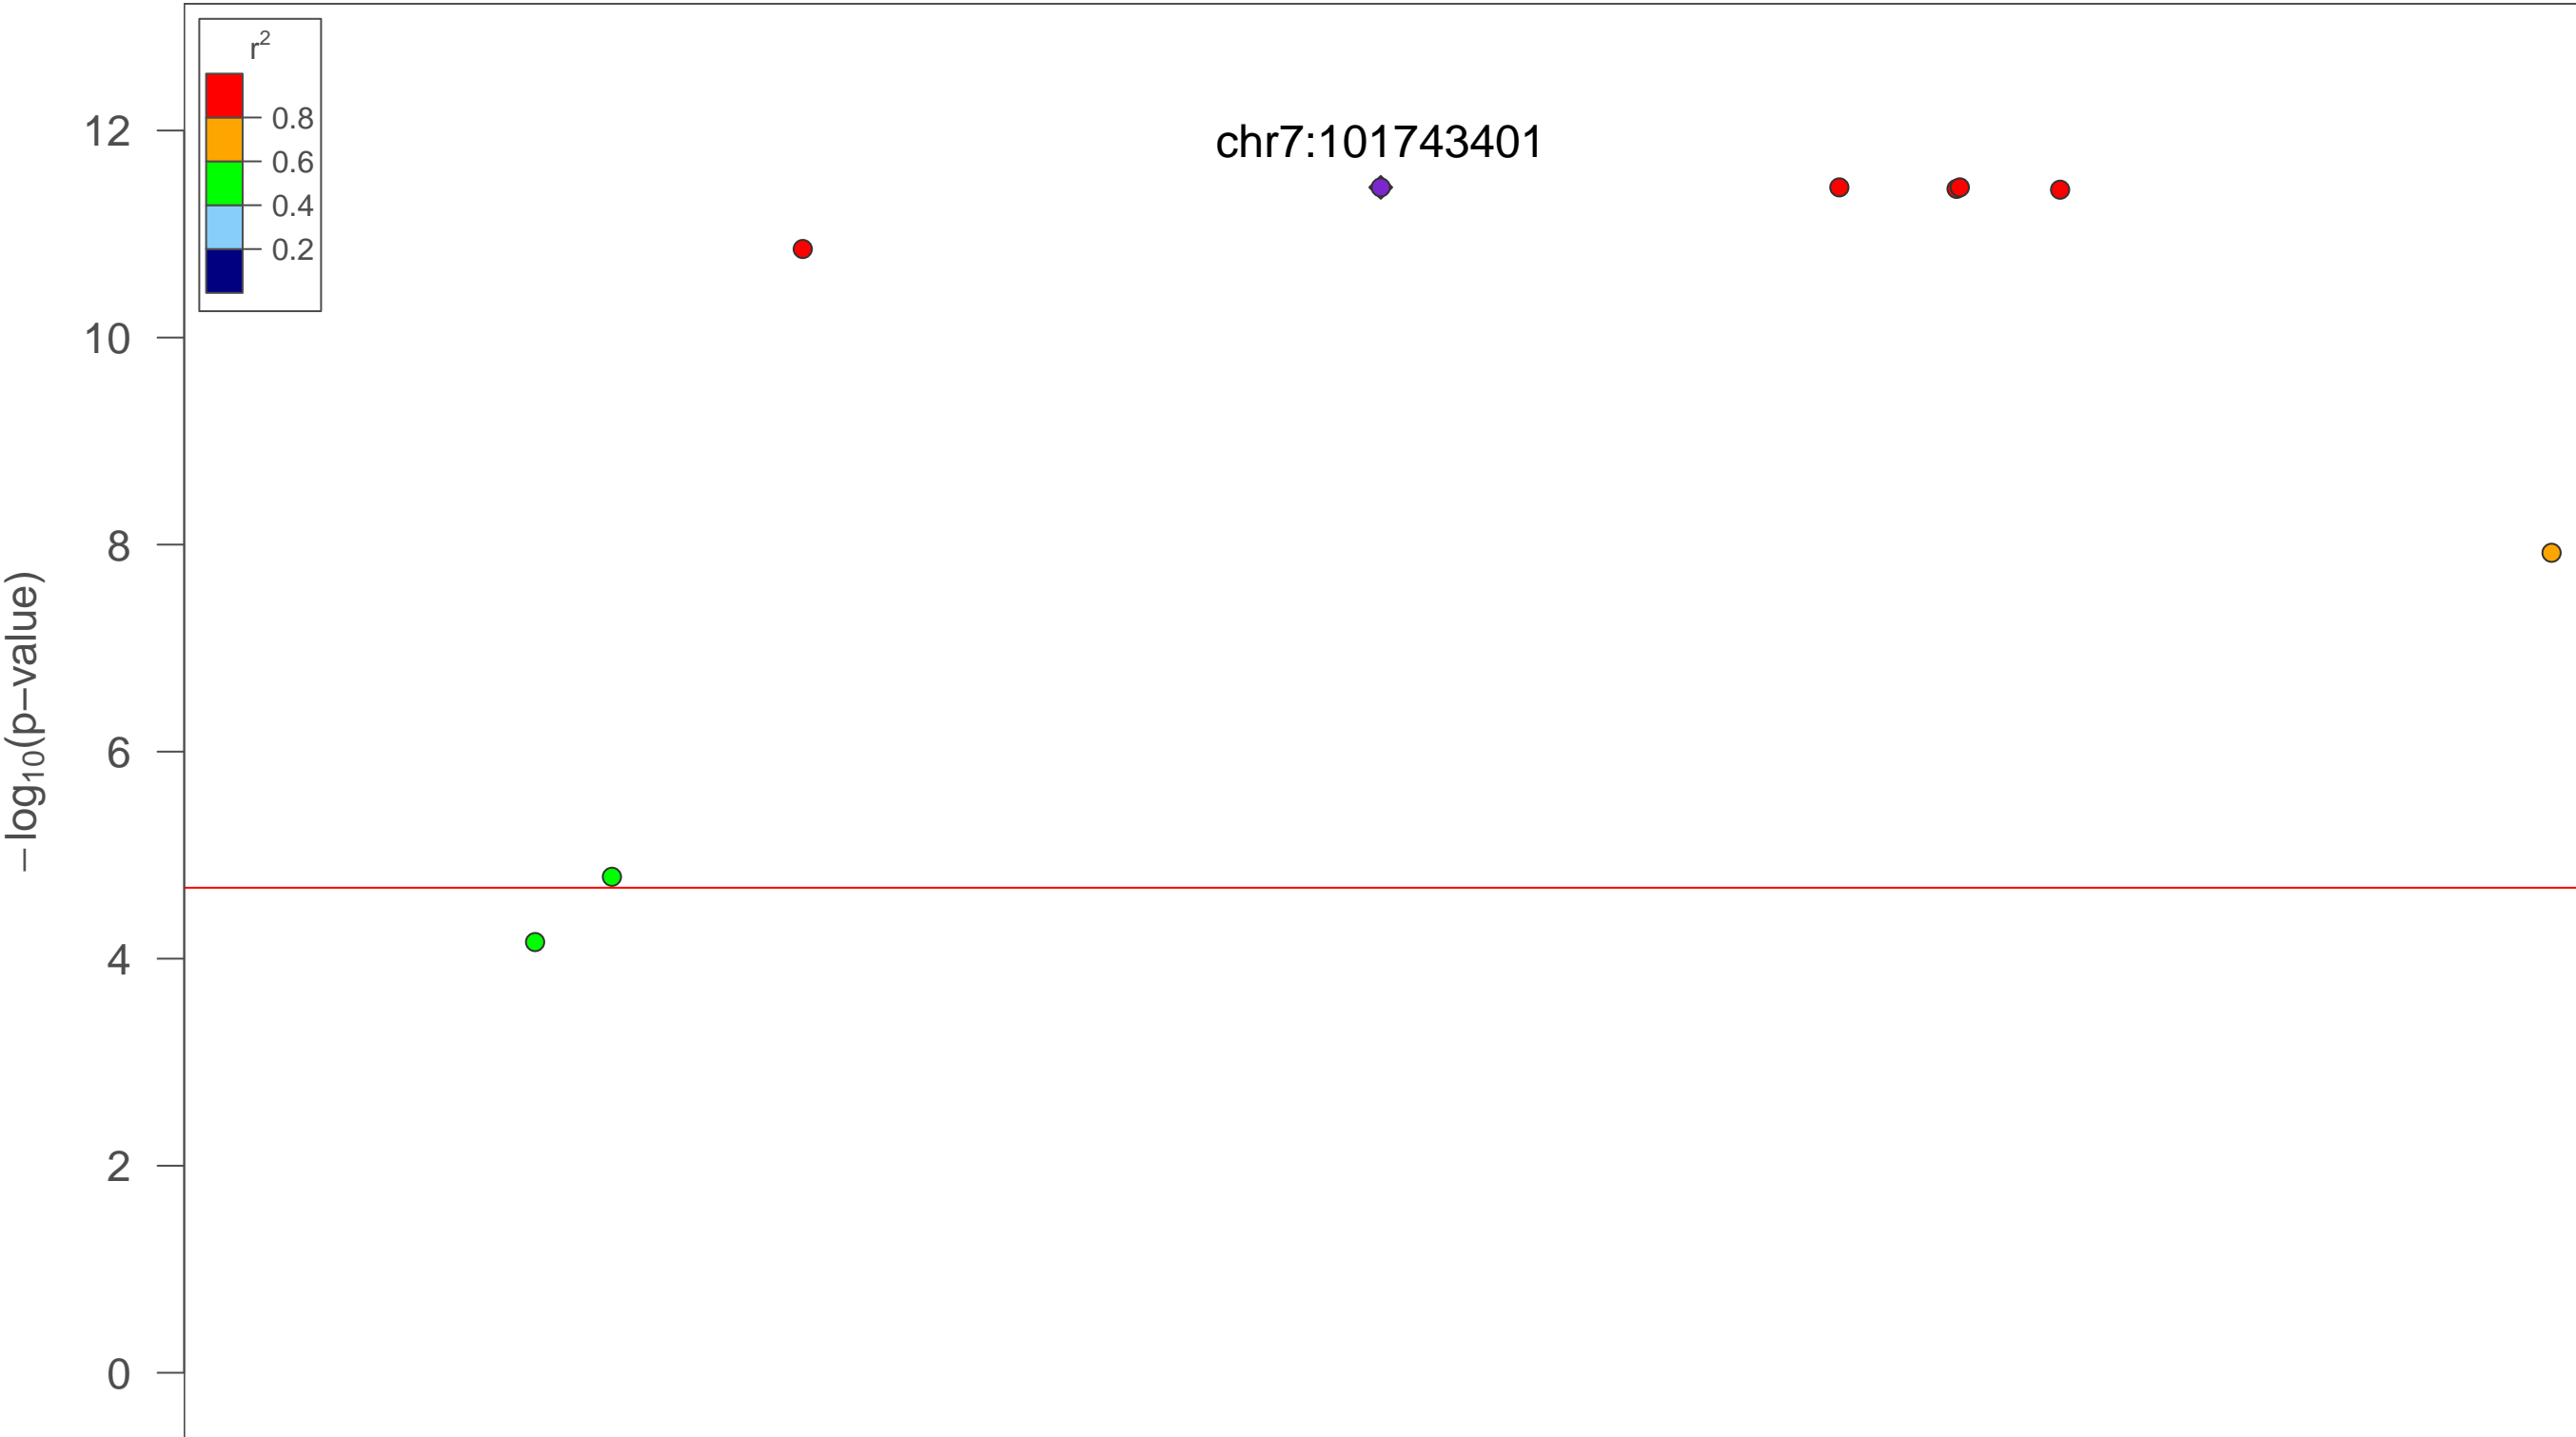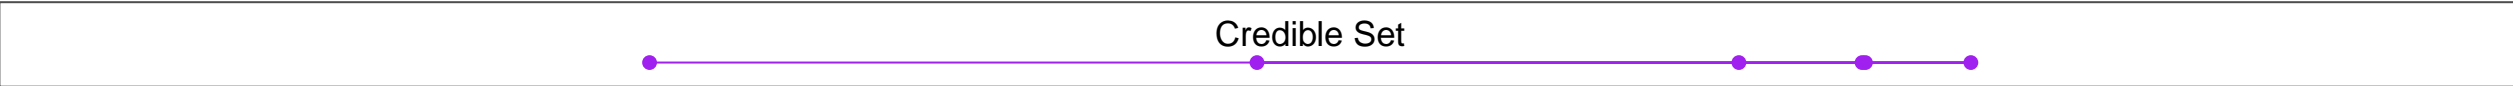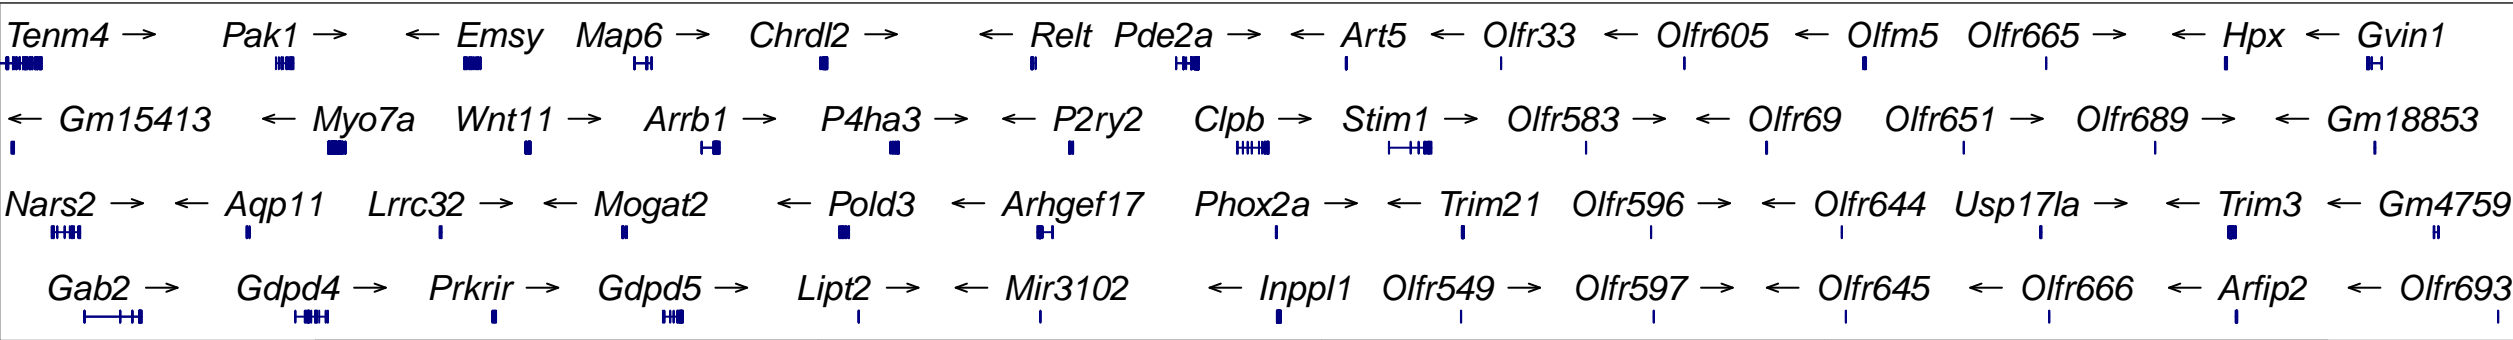

232 genes  
omitted



date: Thu Oct 25 16:47:22 2018

build: F34Array

display range: chr7:96743401–106743401 [96743401–106743401]

hilite range: 0 – 0 [ 0 – 0 ]

reference SNP: chr7:101743401

number of SNPs plotted: 10

min P-value: 3.54E–12 [chr7:101743401]

max P-value: 6.9E–5 [chr7:98210049]

omitted Genes: Usp35, Kctd21, Alg8

omitted Genes: Ndufc2, Thrsp, Kctd14

omitted Genes: Ints4, Aamdc, Rsf1

omitted Genes: Rsf1os1, Clns1a, Capn5

omitted Genes: Omp, Gm16938, B3gnt6

omitted Genes: Acer3, Tsku, Gucy2d

omitted Genes: Uvrag, Dgat2, Gm26705

omitted Genes: Serpinh1, Khlh35, Rps3

omitted Genes: Snord15b, Snord15a, Mir326

omitted Genes: Tpbgl, Slco2b1, Olfr520

omitted Genes: Olfr521, Neu3, Spcs2

omitted Genes: Xrra1, Rnf169, Kcne3

omitted Genes: Pgm2l1, Gpx2-ps1, Ppme1

omitted Genes: C2cd3, Ucp3, Ucp2

omitted Genes: Dnajb13, Coa4, Mrpl48

omitted Genes: Rab6a, Plekha7, Fam168a

omitted Genes: P2ry6, Fchs2, Atg16l2

omitted Genes: Stard10, Arap1, Mir139

omitted Genes: Art2a-ps, Art2b, Folr2

omitted Genes: Folr1, Anapc15, Tomt

omitted Genes: Lamtor1, Lrrc51, Numa1

omitted Genes: Il18bp, Rnf121, Xndc1

omitted Genes: Xntrpc, Trpc2, Art1

omitted Genes: Chrna10, Nup98, Pgap2

omitted Genes: Rhog, Rrm1, Olfr543

omitted Genes: Olfr544, Olfr545, Olfr547

omitted Genes: Olfr550, Olfr551, Olfr552

omitted Genes: Olfr553, Olfr554, Olfr555

omitted Genes: Olfr556, Trim68, Olfr557

omitted Genes: Olfr558, Olfr559, Olfr78

omitted Genes: Olfr560, Olfr561, Olfr564

omitted Genes: Olfr566, Olfr568, Olfr569

Make more plots at <http://csg.sph.umich.edu/locuszoom/>

Fine-mapping Regions

| snp            | chr | pos (Mb)  | pp         | group        | color  |
|----------------|-----|-----------|------------|--------------|--------|
| chr7:99328376  | 7   | 99.32838  | 0.05039541 | Credible Set | purple |
| chr7:101743401 | 7   | 101.74340 | 0.19303482 | Credible Set | purple |
| chr7:103659355 | 7   | 103.65936 | 0.19303482 | Credible Set | purple |
| chr7:104149022 | 7   | 104.14902 | 0.18688221 | Credible Set | purple |
| chr7:104162444 | 7   | 104.16244 | 0.19303482 | Credible Set | purple |
| chr7:104581631 | 7   | 104.58163 | 0.18361792 | Credible Set | purple |

F34 Array, retic parameters mean reticulocyte volume

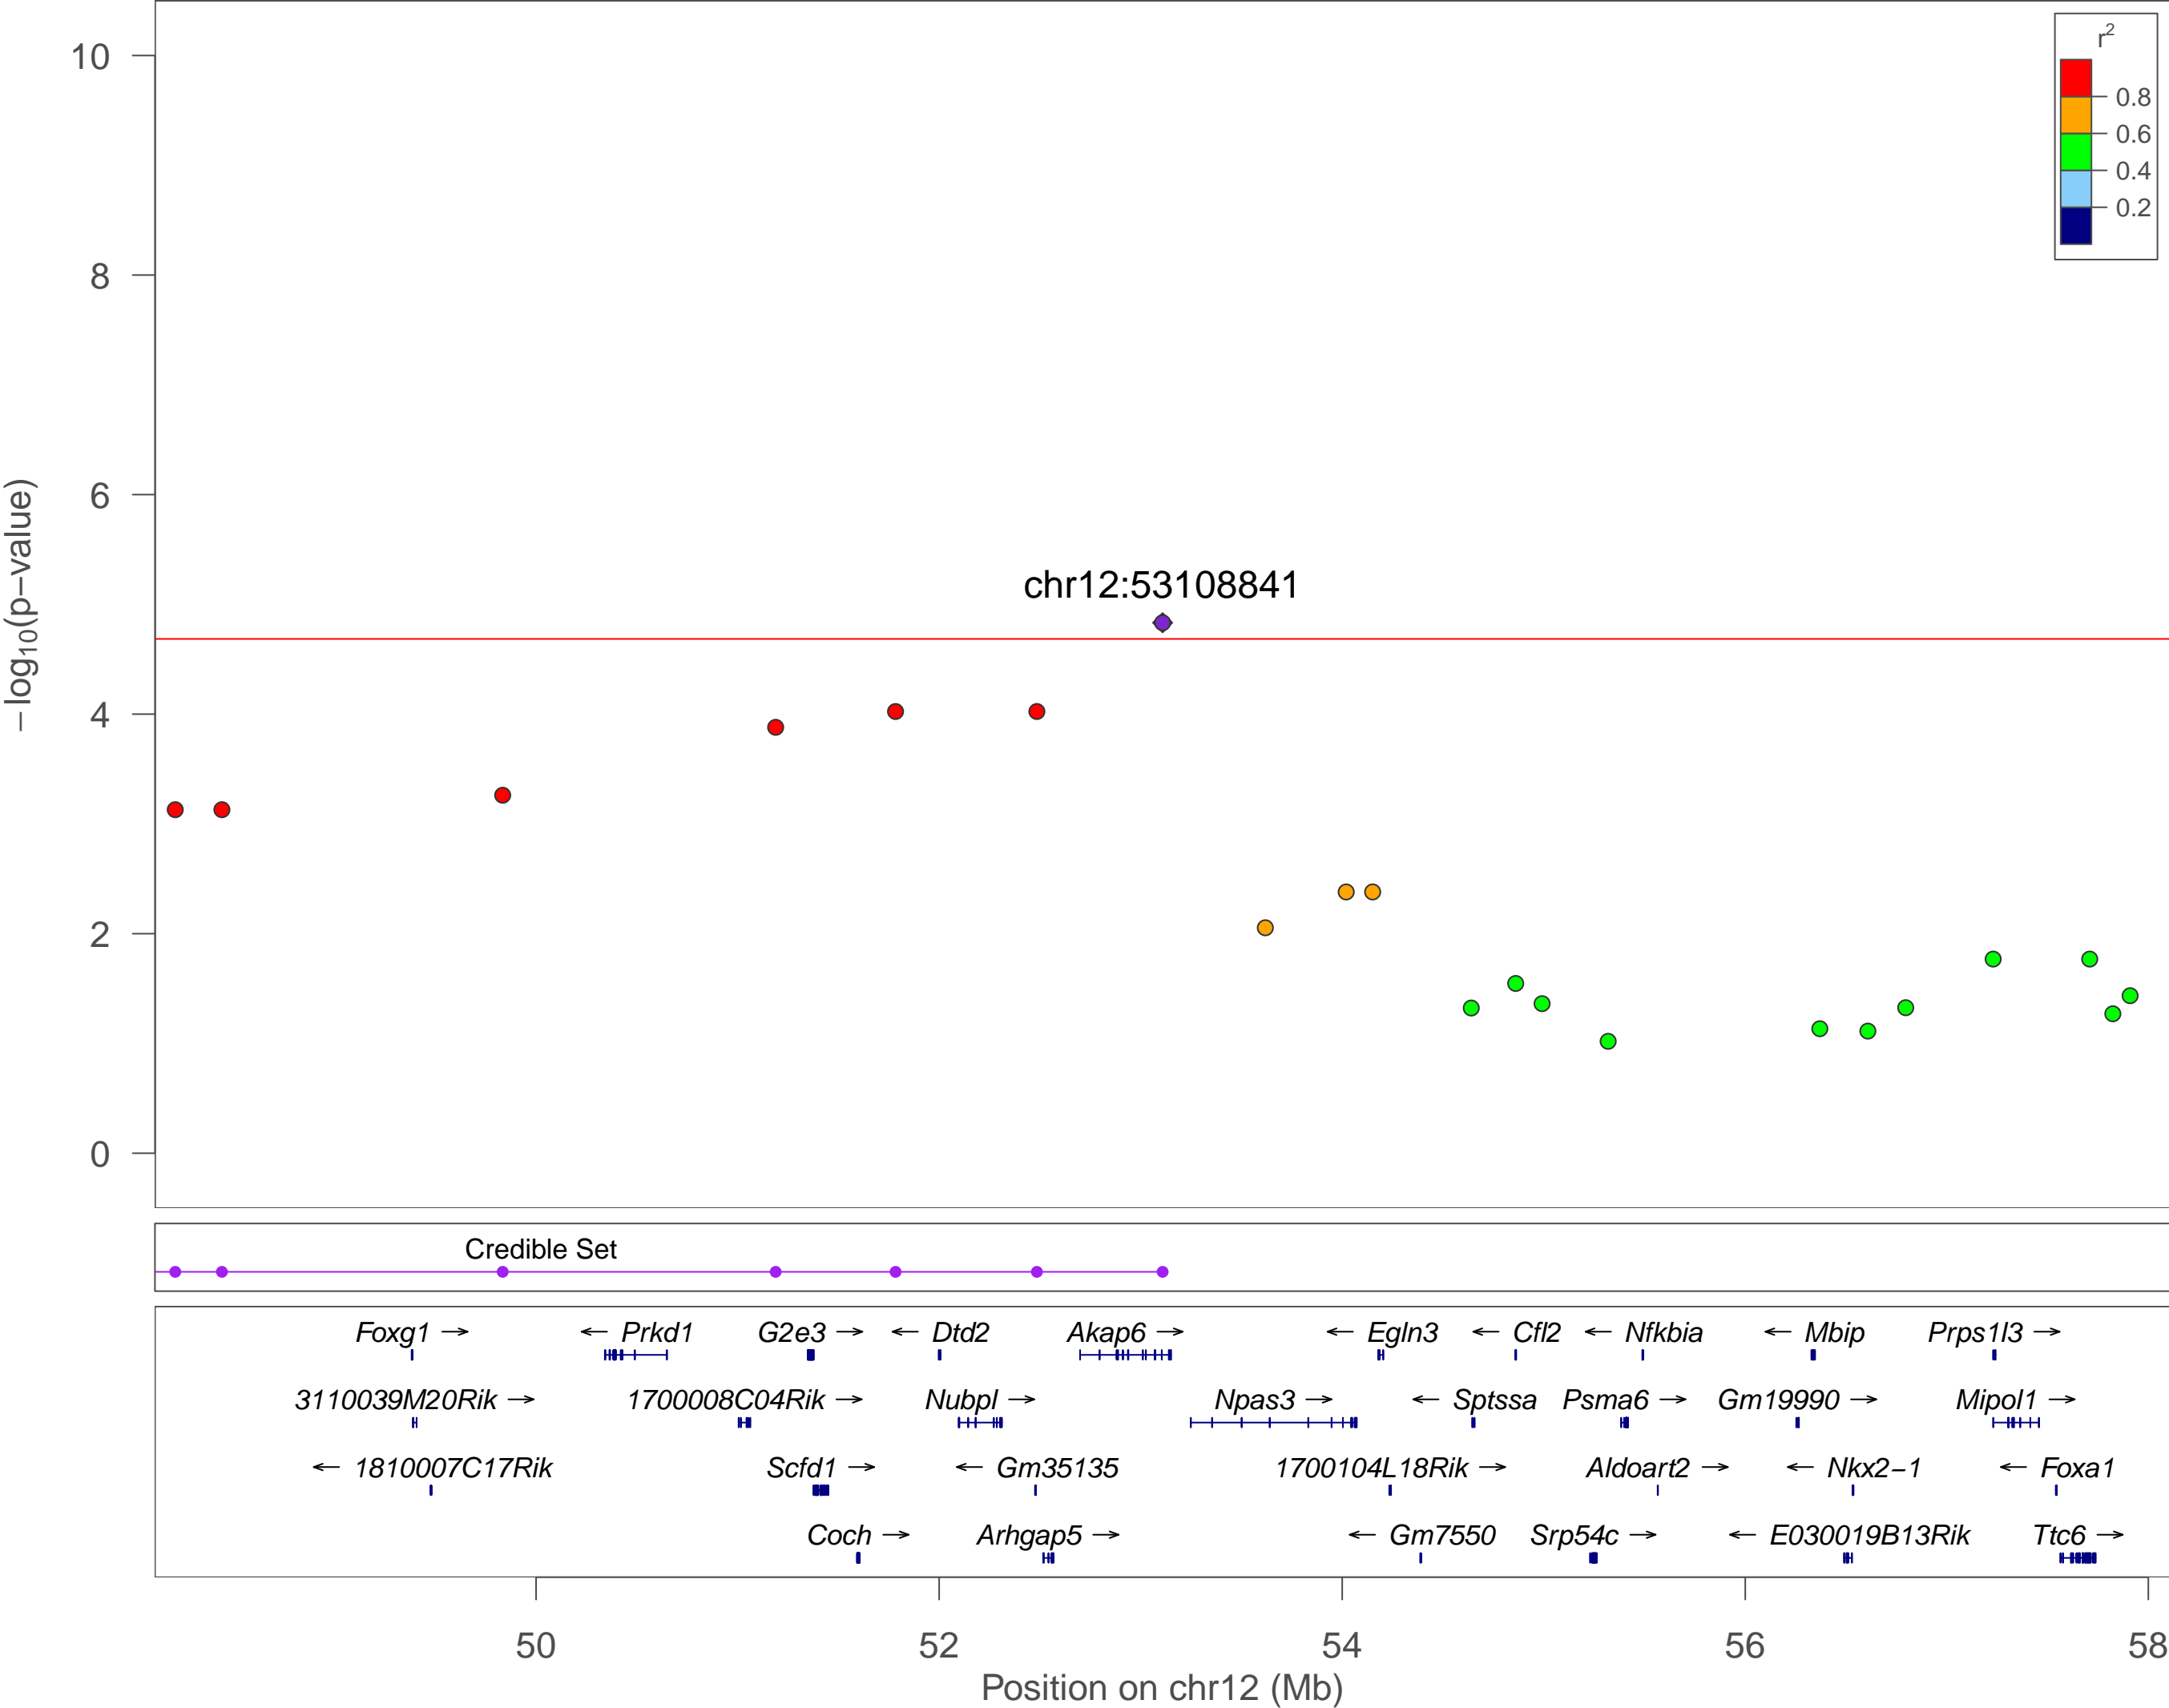

date: Thu Oct 25 16:47:11 2018  
build: F34Array  
display range: chr12:48108841–58108841 [48108841–58108841]  
hilite range: 0 – 0 [ 0 – 0 ]  
reference SNP: chr12:53108841  
number of SNPs plotted: 22  
min P-value: 1.47E–5 [chr12:53108841]  
max P-value: 9.56E–2 [chr12:55319581]  
omitted Genes: Strn3, Ap4s1, Hectd1  
omitted Genes: Heatr5a, Gpr33, 1700031P21Rik  
omitted Genes: Mir1892, Eapp, Snx6  
omitted Genes: Baz1a, 2700097O09Rik, Srp54a  
omitted Genes: Fam177a, Srp54b, 1700047I17Rik2  
omitted Genes: Ppp2r3c, 1110008L16Rik, Insm2  
omitted Genes: Ralgapa1, Brms1l, C87198  
omitted Genes: Nkx2–9, Pax9, Slc25a21  
omitted Genes: 4921518K17Rik, BC042761

Fine-mapping Regions

| snp            | chr | pos (Mb) | pp         | group        | color  |
|----------------|-----|----------|------------|--------------|--------|
| chr12:46941836 | 12  | 46.94184 | 0.01575526 | Credible Set | purple |
| chr12:48209549 | 12  | 48.20955 | 0.01575526 | Credible Set | purple |
| chr12:48441097 | 12  | 48.44110 | 0.01575526 | Credible Set | purple |
| chr12:49834234 | 12  | 49.83423 | 0.02088924 | Credible Set | purple |
| chr12:51188722 | 12  | 51.18872 | 0.07939813 | Credible Set | purple |
| chr12:51783700 | 12  | 51.78370 | 0.10856270 | Credible Set | purple |
| chr12:52484891 | 12  | 52.48489 | 0.10856270 | Credible Set | purple |
| chr12:53108841 | 12  | 53.10884 | 0.63532146 | Credible Set | purple |

# F34 Array, retic parameters cell hemoglobin concentration mean

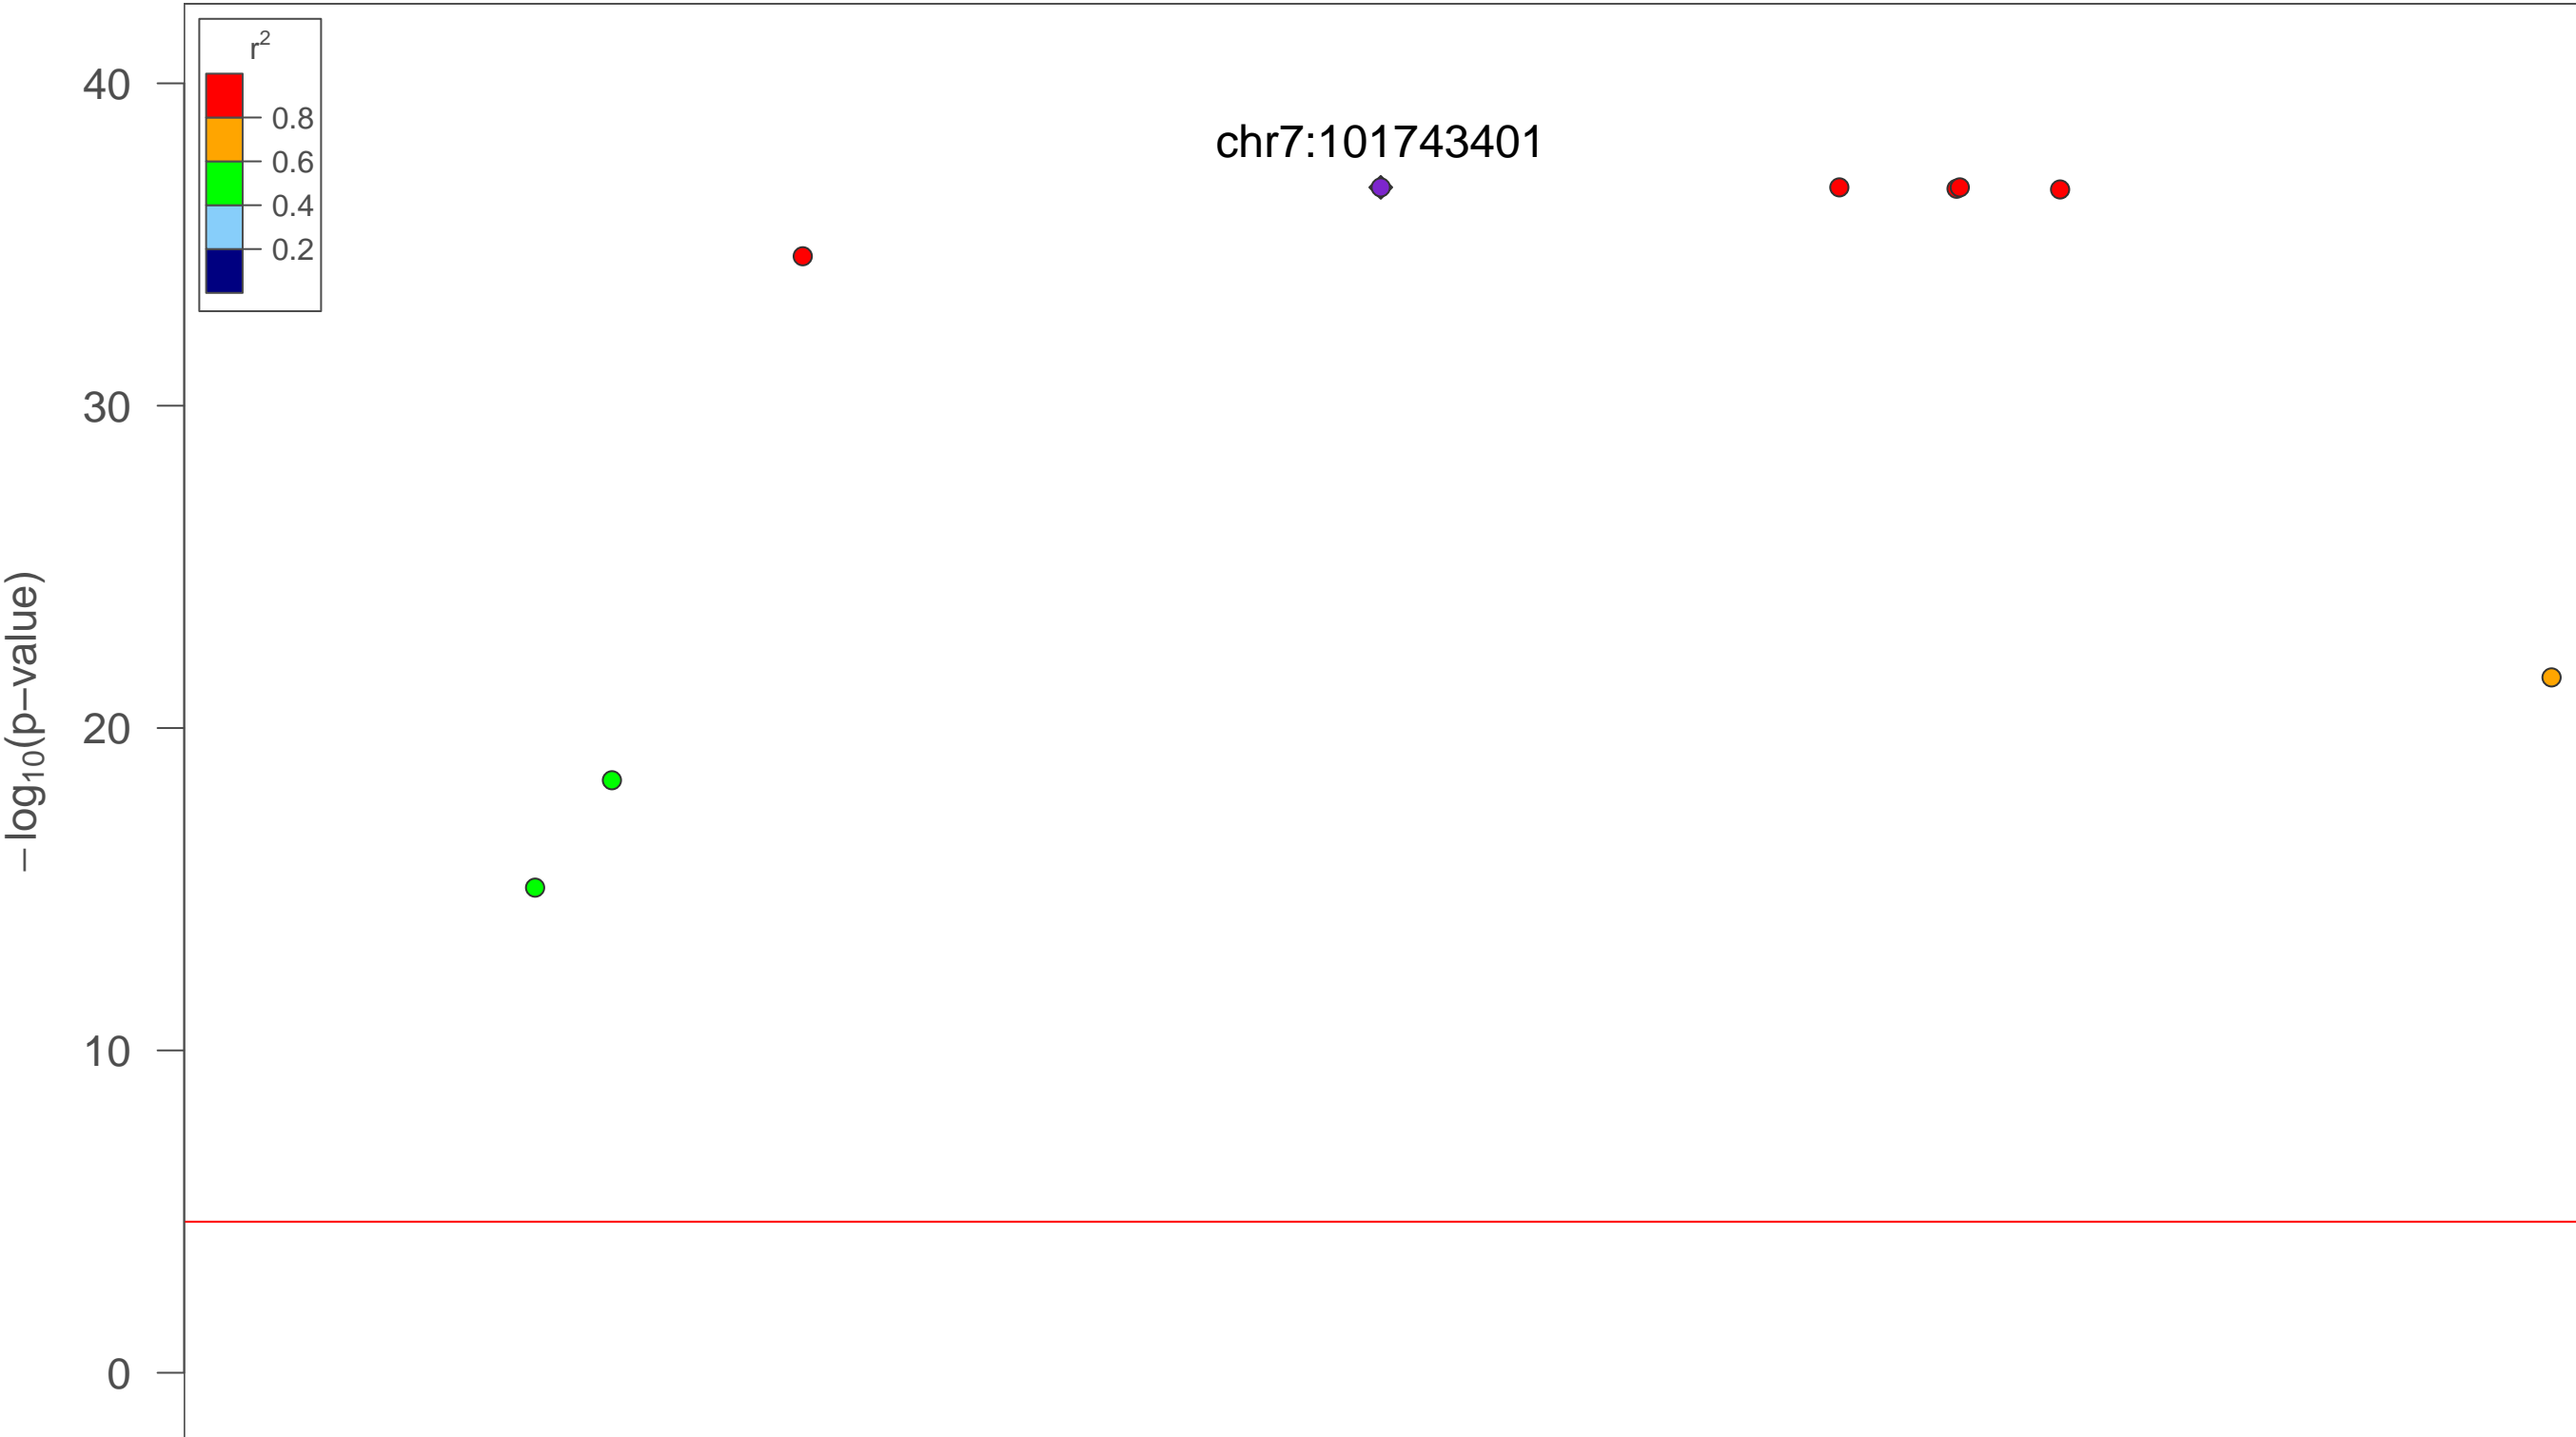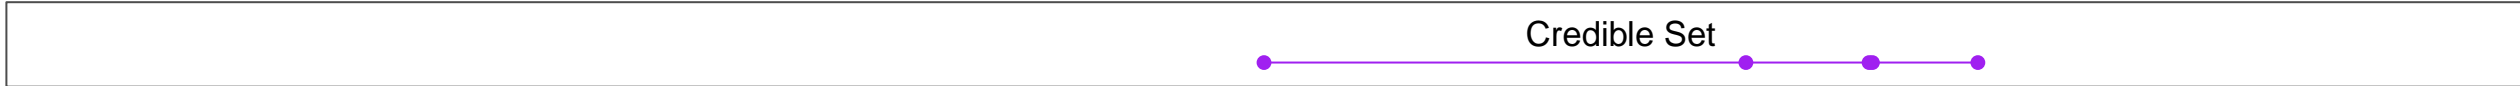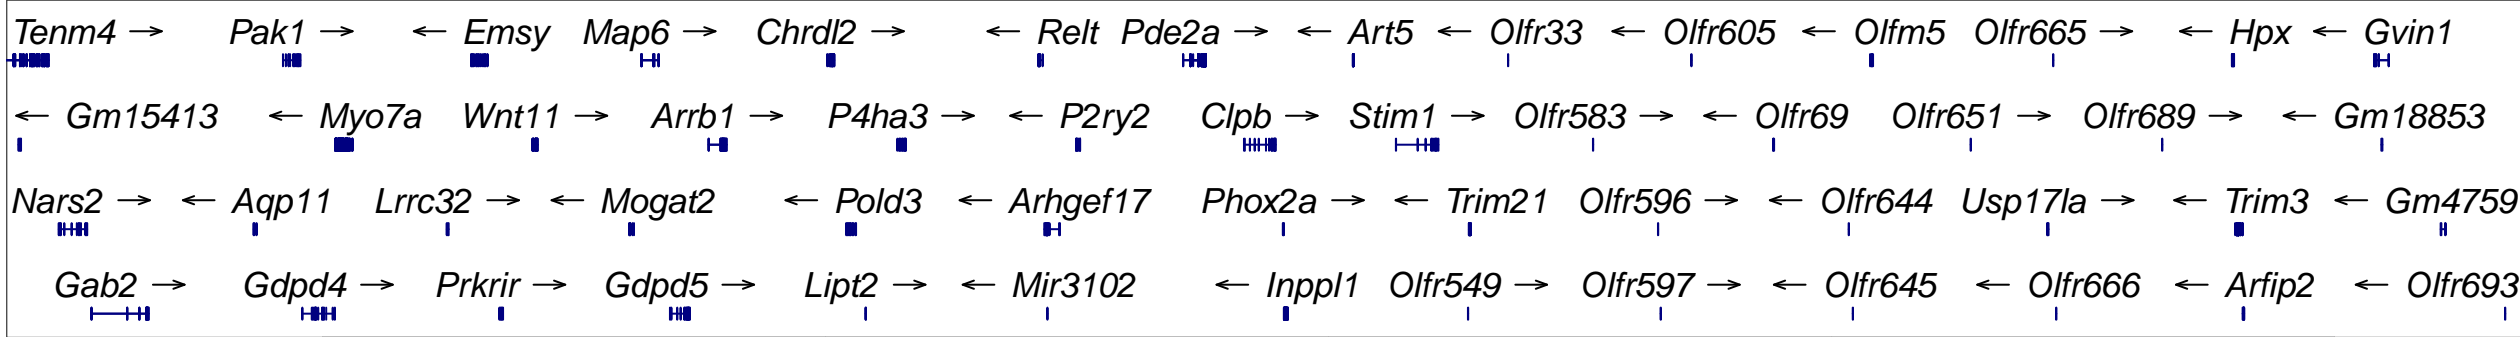

232 genes  
omitted

date: Thu Oct 25 16:47:43 2018

build: F34Array

display range: chr7:96743401–106743401 [96743401–106743401]

hilite range: 0 – 0 [ 0 – 0 ]

reference SNP: chr7:101743401

number of SNPs plotted: 10

min P-value: 1.69E–37 [chr7:101743401]

max P-value: 8.92E–16 [chr7:98210049]

omitted Genes: Usp35, Kctd21, Alg8

omitted Genes: Ndufc2, Thrsp, Kctd14

omitted Genes: Ints4, Aamdc, Rsf1

omitted Genes: Rsf1os1, Clns1a, Capn5

omitted Genes: Omp, Gm16938, B3gnt6

omitted Genes: Acer3, Tsku, Gucy2d

omitted Genes: Uvrag, Dgat2, Gm26705

omitted Genes: Serpinh1, Khlh35, Rps3

omitted Genes: Snord15b, Snord15a, Mir326

omitted Genes: Tpbgl, Slco2b1, Olfr520

omitted Genes: Olfr521, Neu3, Spcs2

omitted Genes: Xrra1, Rnf169, Kcne3

omitted Genes: Pgm2l1, Gpx2-ps1, Ppme1

omitted Genes: C2cd3, Ucp3, Ucp2

omitted Genes: Dnajb13, Coa4, Mrpl48

omitted Genes: Rab6a, Plekhhb1, Fam168a

omitted Genes: P2ry6, Fchsd2, Atg16l2

omitted Genes: Stard10, Arap1, Mir139

omitted Genes: Art2a-ps, Art2b, Folr2

omitted Genes: Folr1, Anapc15, Tomt

omitted Genes: Lamtor1, Lrrc51, Numa1

omitted Genes: Il18bp, Rnf121, Xndc1

omitted Genes: Xntrpc, Trpc2, Art1

omitted Genes: Chrna10, Nup98, Pgap2

omitted Genes: Rhog, Rrm1, Olfr543

omitted Genes: Olfr544, Olfr545, Olfr547

omitted Genes: Olfr550, Olfr551, Olfr552

omitted Genes: Olfr553, Olfr554, Olfr555

omitted Genes: Olfr556, Trim68, Olfr557

omitted Genes: Olfr558, Olfr559, Olfr78

omitted Genes: Olfr560, Olfr561, Olfr564

omitted Genes: Olfr566, Olfr568, Olfr569

Make more plots at <http://csg.sph.umich.edu/locuszoom/>

Fine-mapping Regions

| snp            | chr | pos (Mb) | pp        | group        | color  |
|----------------|-----|----------|-----------|--------------|--------|
| chr7:101743401 | 7   | 101.7434 | 0.2093022 | Credible Set | purple |
| chr7:103659355 | 7   | 103.6594 | 0.2093022 | Credible Set | purple |
| chr7:104149022 | 7   | 104.1490 | 0.1900482 | Credible Set | purple |
| chr7:104162444 | 7   | 104.1624 | 0.2093022 | Credible Set | purple |
| chr7:104581631 | 7   | 104.5816 | 0.1804691 | Credible Set | purple |



# F34 Array, retic parameters concentration of hemoglobin in reticulocytes, repeat

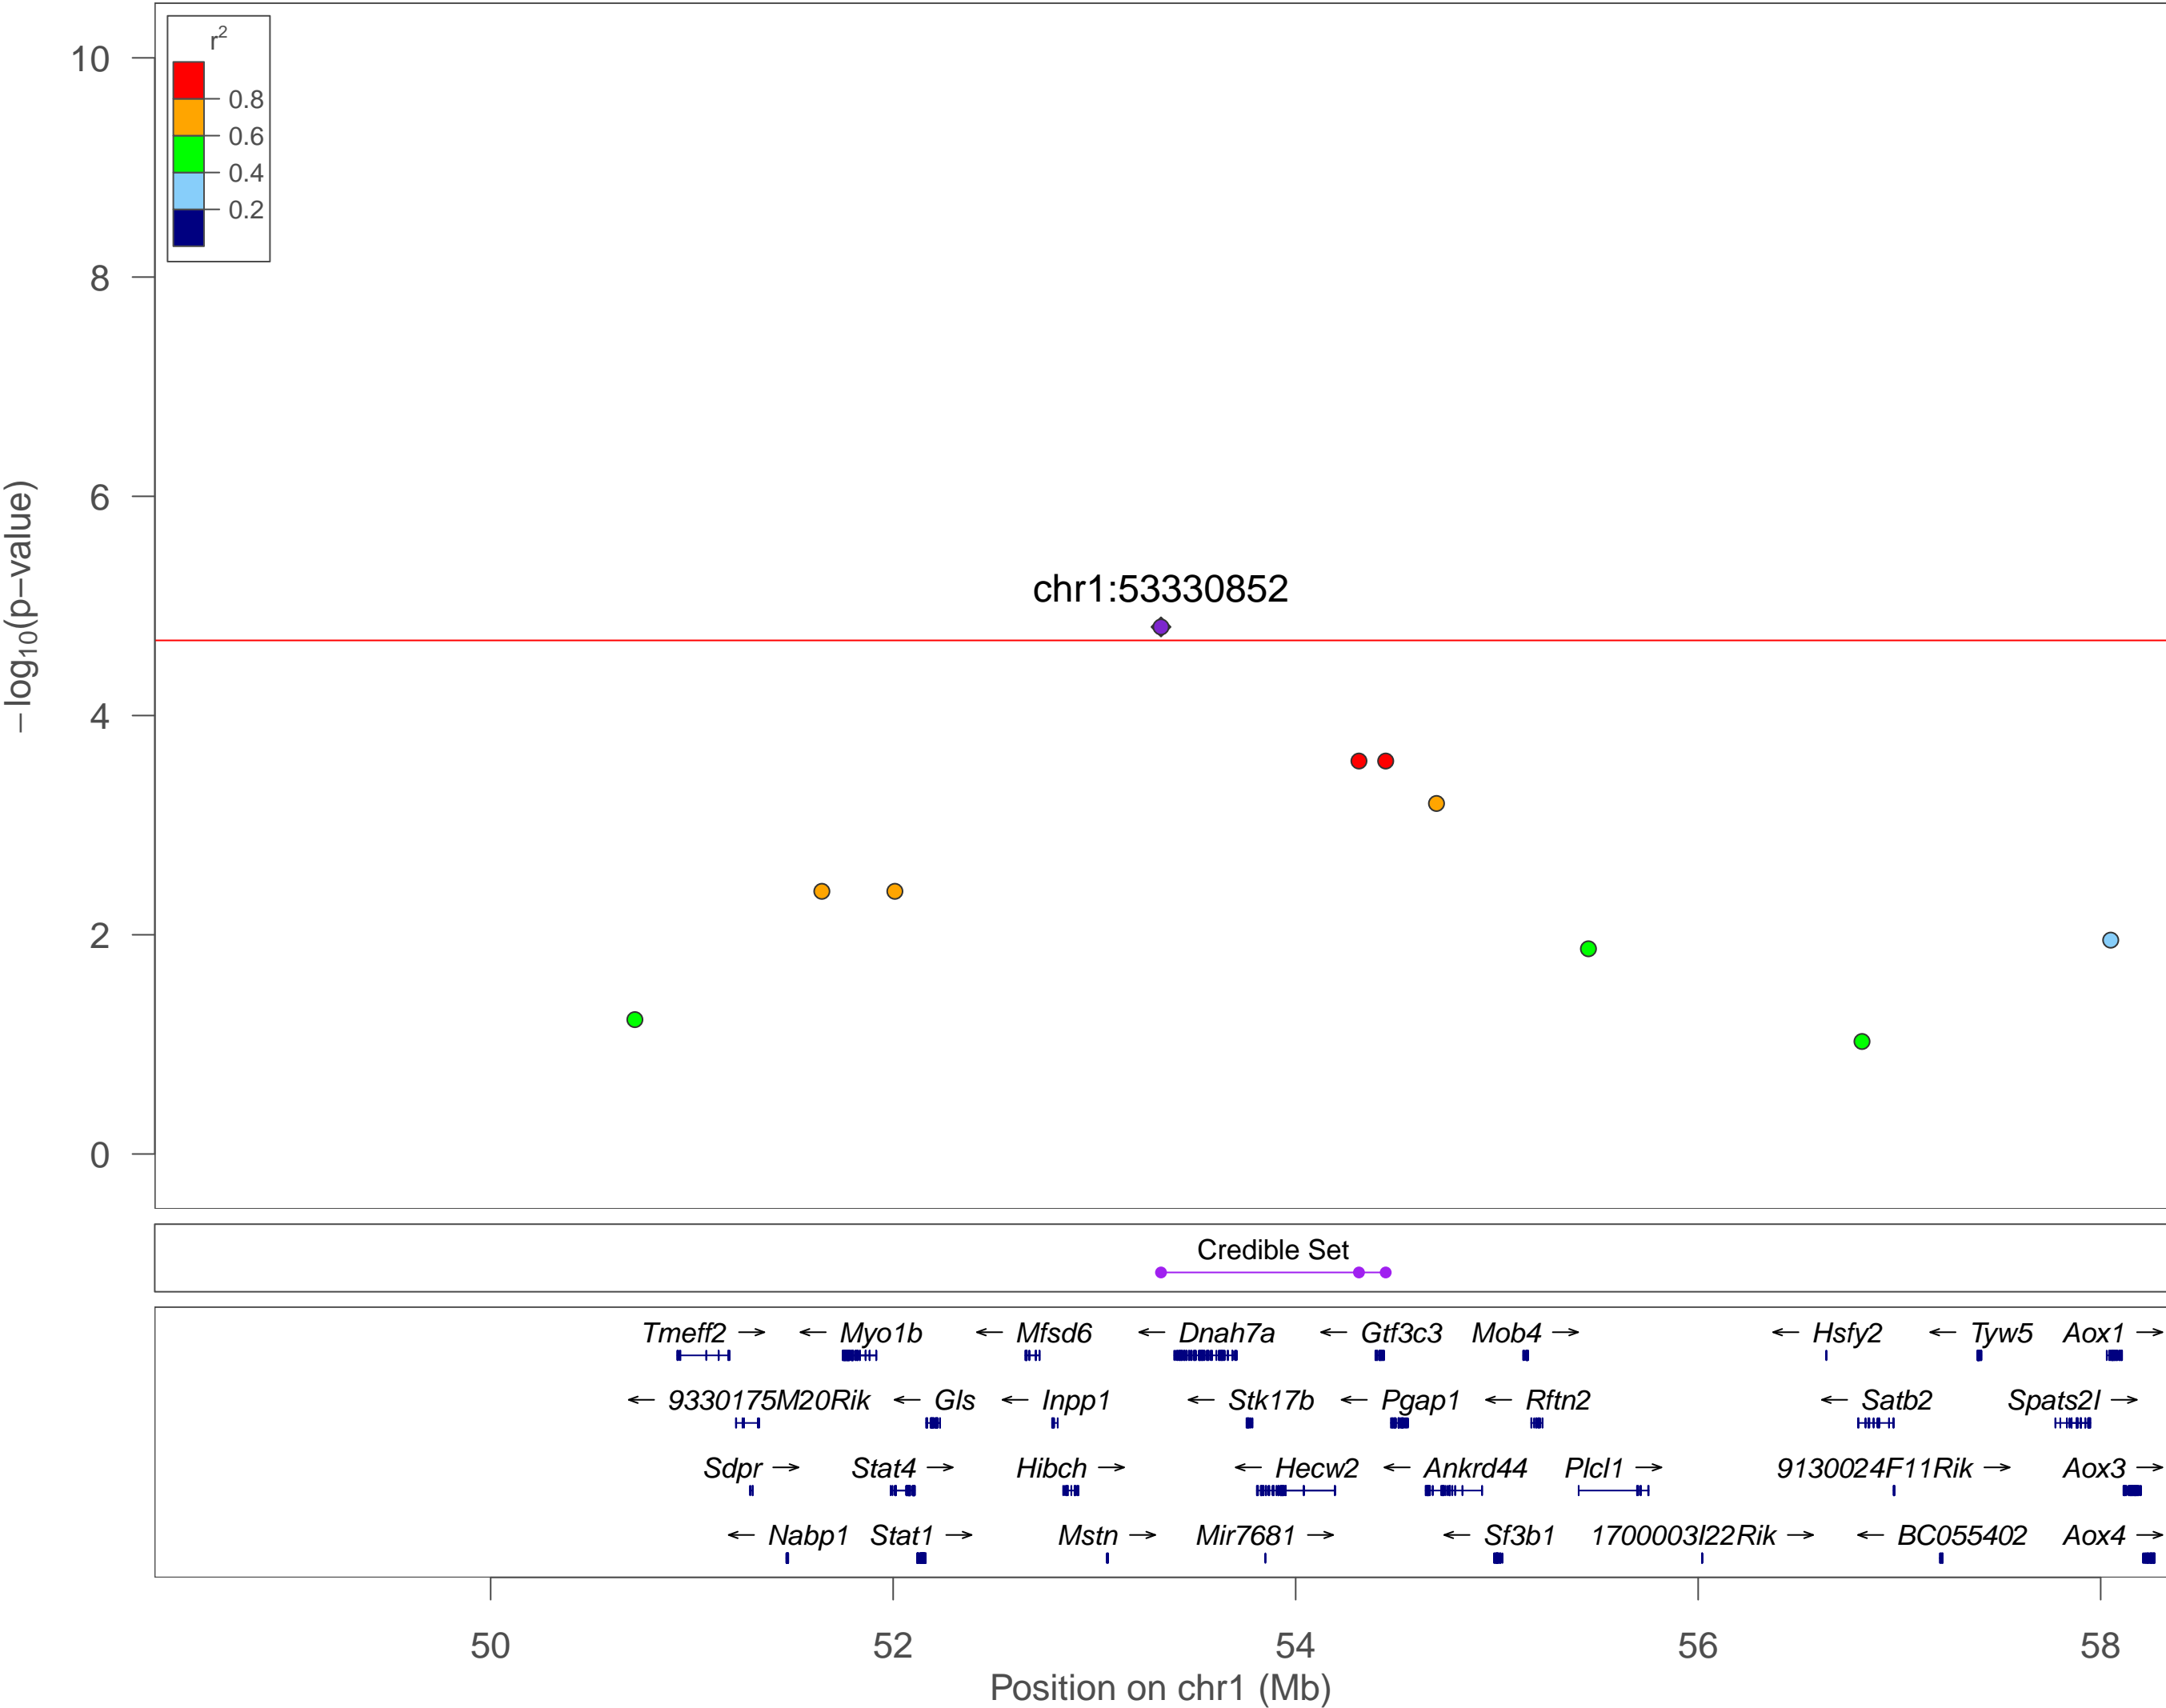

date: Thu Oct 25 16:47:59 2018  
build: F34Array  
display range: chr1:48330852–58330852 [48330852–58330852]  
hilite range: 0 – 0 [ 0 – 0 ]  
reference SNP: chr1:53330852  
number of SNPs plotted: 11  
min P-value: 1.55E–5 [chr1:53330852]  
max P-value: 9.41E–2 [chr1:56814006]  
omitted Genes: Nab1, Tmem194b, 1700019D03Rik  
omitted Genes: 1700019A02Rik, Pms1, Ormdl1  
omitted Genes: Osgepl1, Asnsd1, Ccdc150  
omitted Genes: Coq10b, Hspd1, Hspe1  
omitted Genes: Mars2, Boll, Gm6644  
omitted Genes: 9130227L01Rik, 4930558J18Rik, 1700066M21Rik  
omitted Genes: 9430016H08Rik, Kctd18, Sgol2a  
omitted Genes: Aox2

Fine-mapping Regions

| snp           | chr | pos (Mb) | pp        | group        | color  |
|---------------|-----|----------|-----------|--------------|--------|
| chr1:53330852 | 1   | 53.33085 | 0.8778534 | Credible Set | purple |
| chr1:54314429 | 1   | 54.31443 | 0.0610733 | Credible Set | purple |
| chr1:54447274 | 1   | 54.44727 | 0.0610733 | Credible Set | purple |

F34 Array, retic parameters concentration of hemoglobin in reticulocytes, repeat

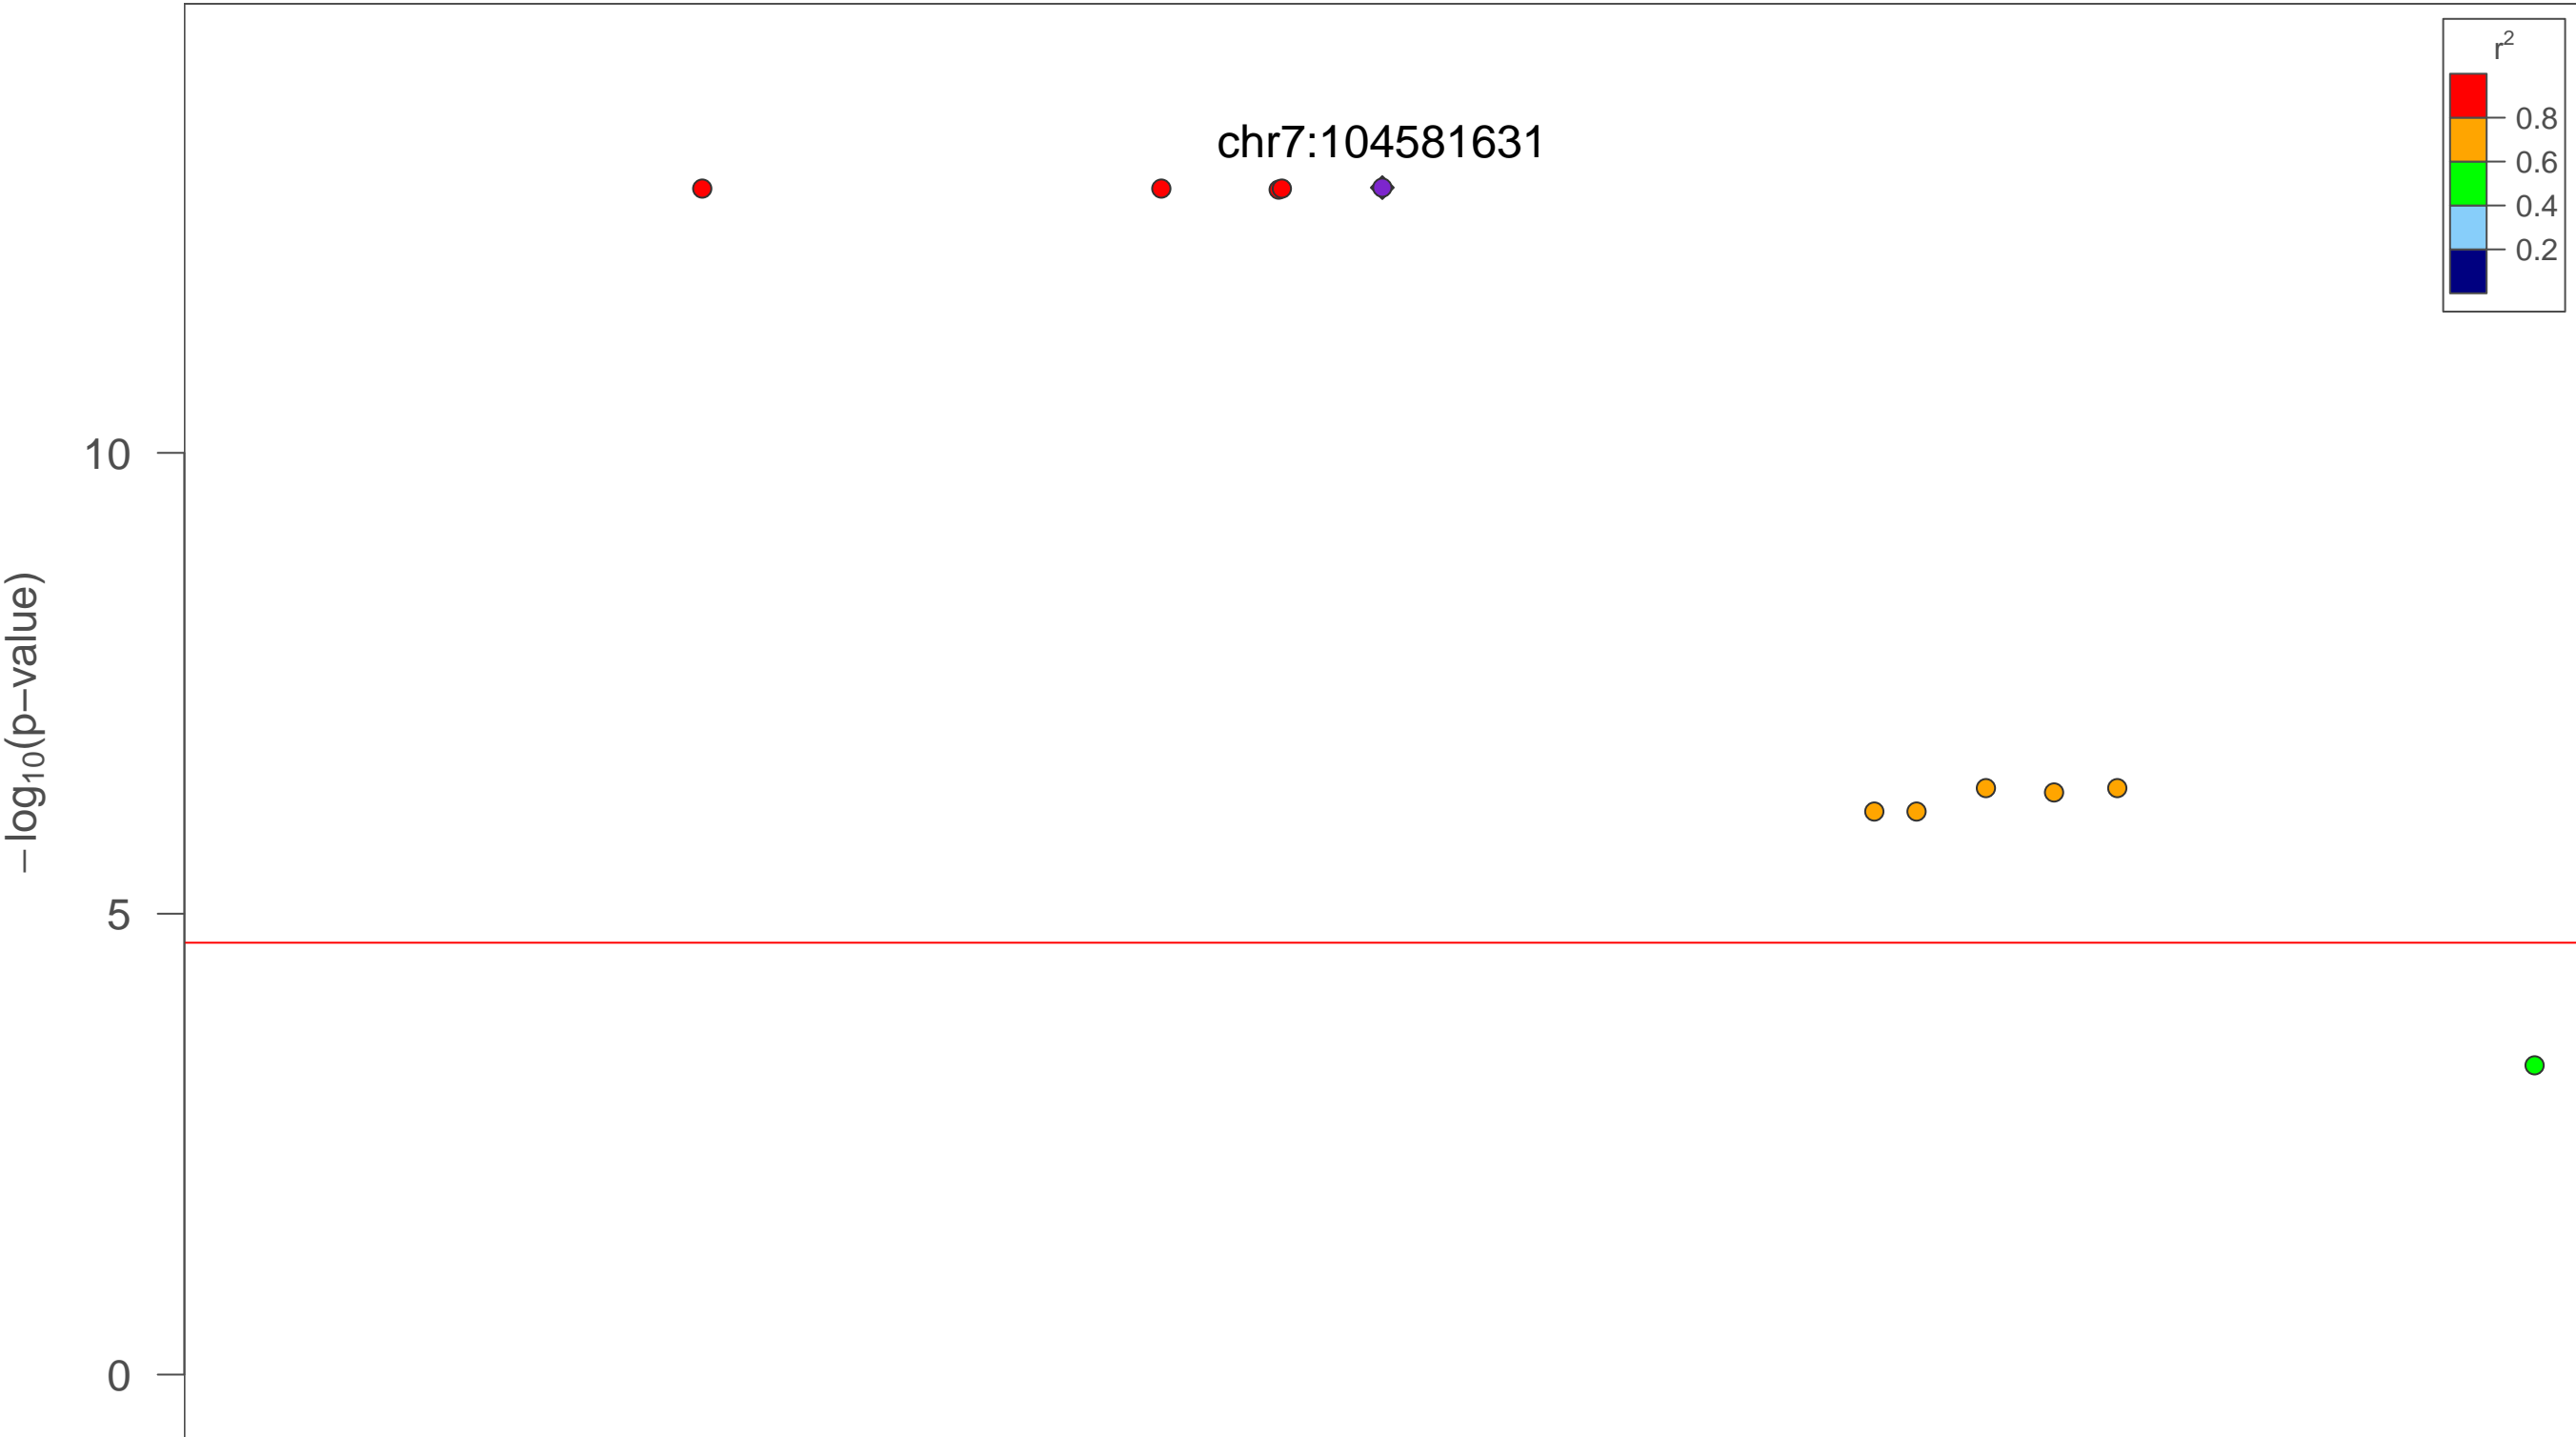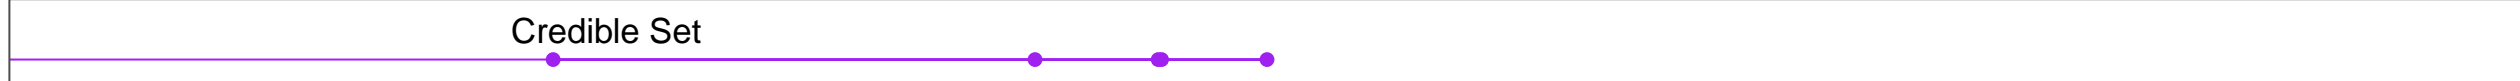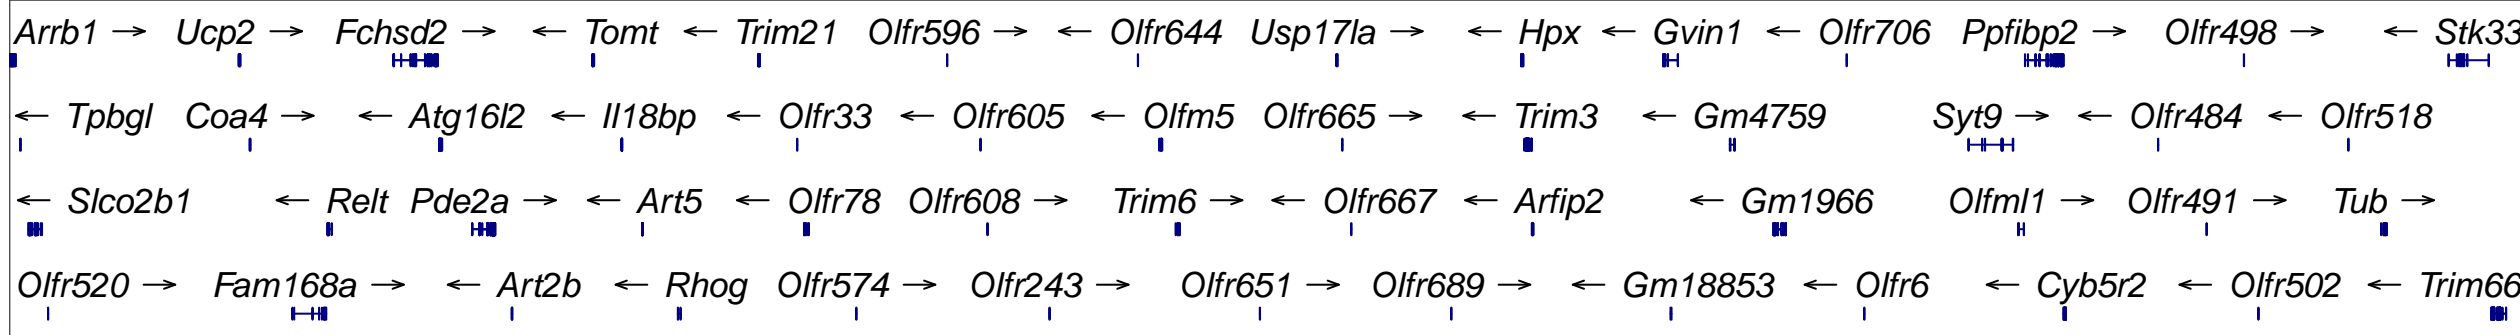

270 genes  
omitted

date: Thu Oct 25 16:48:27 2018

build: F34Array

display range: chr7:99581631–109581631 [99581631–109581631]

hilite range: 0 – 0 [ 0 – 0 ]

reference SNP: chr7:104581631

number of SNPs plotted: 12

min P-value: 1.32E–13 [chr7:104581631]

max P-value: 4.41E–4 [chr7:109390566]

omitted Genes: Olfr521, Neu3, Spcs2

omitted Genes: Xrra1, Rnf169, Chrdl2

omitted Genes: Pold3, Lipt2, Kcne3

omitted Genes: Pgm2l1, Gpx2-ps1, P4ha3

omitted Genes: Ppme1, C2cd3, Ucp3

omitted Genes: Dnajb13, Mrpl48, Rab6a

omitted Genes: Plekhhb1, Arhgef17, Mir3102

omitted Genes: P2ry6, P2ry2, Stard10

omitted Genes: Arap1, Mir139, Art2a-ps

omitted Genes: Clpb, Phox2a, Inpp1

omitted Genes: Folr2, Folr1, Anapc15

omitted Genes: Lamtor1, Lrrc51, Numa1

omitted Genes: Rnf121, Xndc1, Xntrpc

omitted Genes: Trpc2, Art1, Chrna10

omitted Genes: Nup98, Pgap2, Stim1

omitted Genes: Rrm1, Olfr543, Olfr544

omitted Genes: Olfr545, Olfr547, Olfr549

omitted Genes: Olfr550, Olfr551, Olfr552

omitted Genes: Olfr553, Olfr554, Olfr555

omitted Genes: Olfr556, Trim68, Olfr557

omitted Genes: Olfr558, Olfr559, Olfr560

omitted Genes: Olfr561, Olfr564, Olfr566

omitted Genes: Olfr568, Olfr569, Olfr570

omitted Genes: Olfr571, Olfr572, Olfr575

omitted Genes: Olfr576, Olfr577, Olfr578

omitted Genes: Olfr582, Olfr583, Olfr584

omitted Genes: Olfr585, Olfr586, Olfr589

omitted Genes: Olfr591, Olfr592, Olfr593

omitted Genes: Olfr594, Usp17ld, Olfr597

omitted Genes: Olfr598, Olfr599, Olfr600

omitted Genes: Olfr601, Olfr603, Usp17lc

omitted Genes: Olfr606, Olfr609, Olfr610

Make more plots at <http://csg.sph.umich.edu/locuszoom/>

Fine-mapping Regions

| snp            | chr | pos (Mb)  | pp         | group        | color  |
|----------------|-----|-----------|------------|--------------|--------|
| chr7:99328376  | 7   | 99.32838  | 0.06413313 | Credible Set | purple |
| chr7:101743401 | 7   | 101.74340 | 0.18722938 | Credible Set | purple |
| chr7:103659355 | 7   | 103.65936 | 0.18722938 | Credible Set | purple |
| chr7:104149022 | 7   | 104.14902 | 0.18251656 | Credible Set | purple |
| chr7:104162444 | 7   | 104.16244 | 0.18722938 | Credible Set | purple |
| chr7:104581631 | 7   | 104.58163 | 0.19166215 | Credible Set | purple |

F34 Array, retic parameters concentration of hemoglobin in reticulocytes, repeat

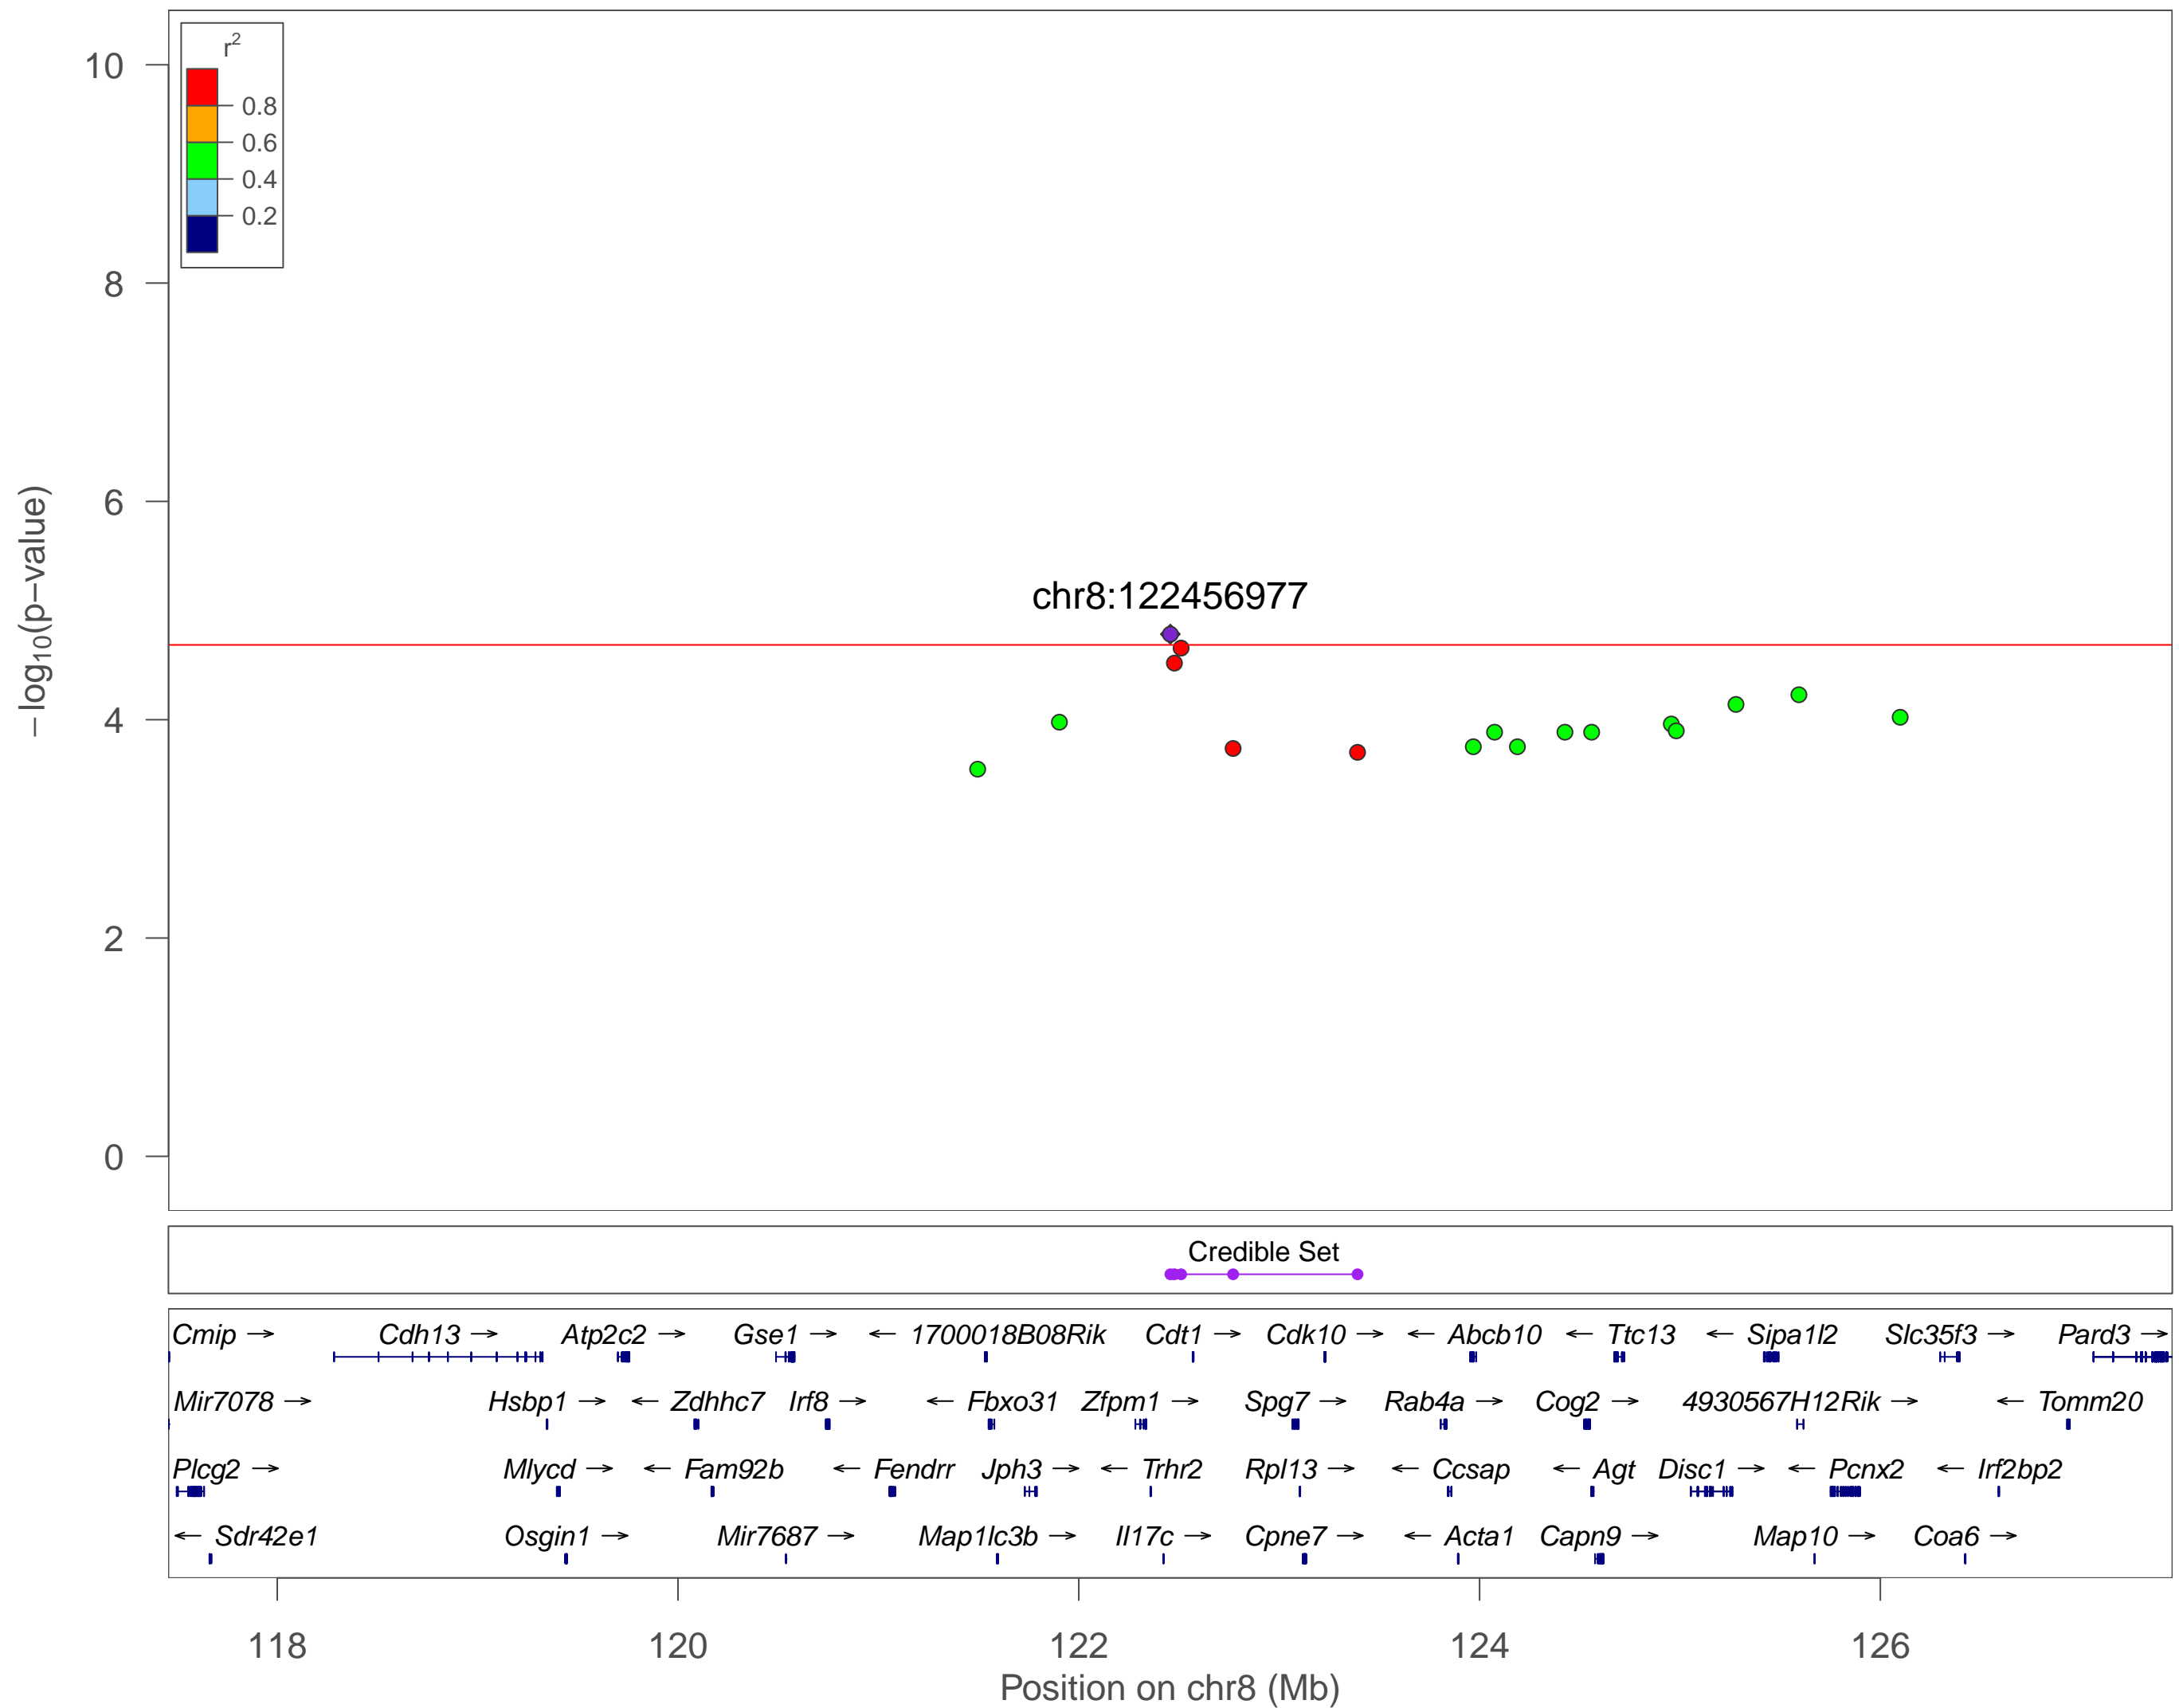

date: Thu Oct 25 16:48:47 2018

build: F34Array

display range: chr8:117456977–127456977 [117456977–127456977]

hilite range: 0 – 0 [ 0 – 0 ]

reference SNP: chr8:122456977

number of SNPs plotted: 18

min P-value: 1.65E–5 [chr8:122456977]

max P-value: 2.84E–4 [chr8:121495351]

omitted Genes: Gm38416, Hsd17b2, Mphosph6

omitted Genes: Necab2, Slc38a8, Mbtps1

omitted Genes: Hsd11, Dnaaf1, Taf1c

omitted Genes: Adad2, Kcng4, Wfdc1

omitted Genes: Tldc1, Cotl1, Klhl36

omitted Genes: Usp10, Crispld2, 6430548M08Rik

omitted Genes: A330074K22Rik, Gins2, Emc8–1190005i06rik

omitted Genes: 1190005I06Rik, Emc8, Cox4i1

omitted Genes: Foxf1, Mthfsd, Foxc2

omitted Genes: Foxl1, 1700030M09Rik, Zcchc14

omitted Genes: Klhdc4, Slc7a5, BC048644

omitted Genes: Car5a, Banp, Mir7237

omitted Genes: Zc3h18, Cyba, Mvd

omitted Genes: 9330133O14Rik, Gm20735, Snai3

omitted Genes: Rnf166, Ctu2, Piezo1

omitted Genes: Aprt, Galns, Trappc2l

omitted Genes: Pabpn1l, Mir6396, Cbfa2t3

omitted Genes: Acsf3, Cdh15, Ankrd11

omitted Genes: 2810013P06Rik, Snord68, Mir7079

omitted Genes: Mir7080, Sult5a1, Dpep1

omitted Genes: Chmp1a, Spata33, Spata2l

omitted Genes: 4933417D19Rik, Vps9d1, Zfp276

omitted Genes: Fanca, Spire2, Tcf25

omitted Genes: Mc1r, Tubb3, Def8

omitted Genes: Afg3l1, Dbn1d1, Gas8

omitted Genes: n-R5s100, n-R5s103, n-R5s104

omitted Genes: n-R5s105, n-R5s108, n-R5s110

omitted Genes: n-R5s111, n-R5s113, Gm25018

omitted Genes: n-R5s117, n-R5s121, n-R5s122

omitted Genes: n-R5s123, n-R5s124, n-R5s128

omitted Genes: Gm26391, n-R5s133, n-R5s134

omitted Genes: n-R5s135, n-R5s136, n-R5s138

Make more plots at <http://csg.sph.umich.edu/locuszoom/>



Fine-mapping Regions

| snp            | chr | pos (Mb) | pp         | group        | color  |
|----------------|-----|----------|------------|--------------|--------|
| chr8:122456977 | 8   | 122.4570 | 0.39795211 | Credible Set | purple |
| chr8:122477261 | 8   | 122.4773 | 0.22278052 | Credible Set | purple |
| chr8:122510562 | 8   | 122.5106 | 0.30110485 | Credible Set | purple |
| chr8:122770060 | 8   | 122.7701 | 0.04056677 | Credible Set | purple |
| chr8:123390979 | 8   | 123.3910 | 0.03759574 | Credible Set | purple |

F34 Array, retic parameters concentration of hemoglobin in reticulocytes, repeat

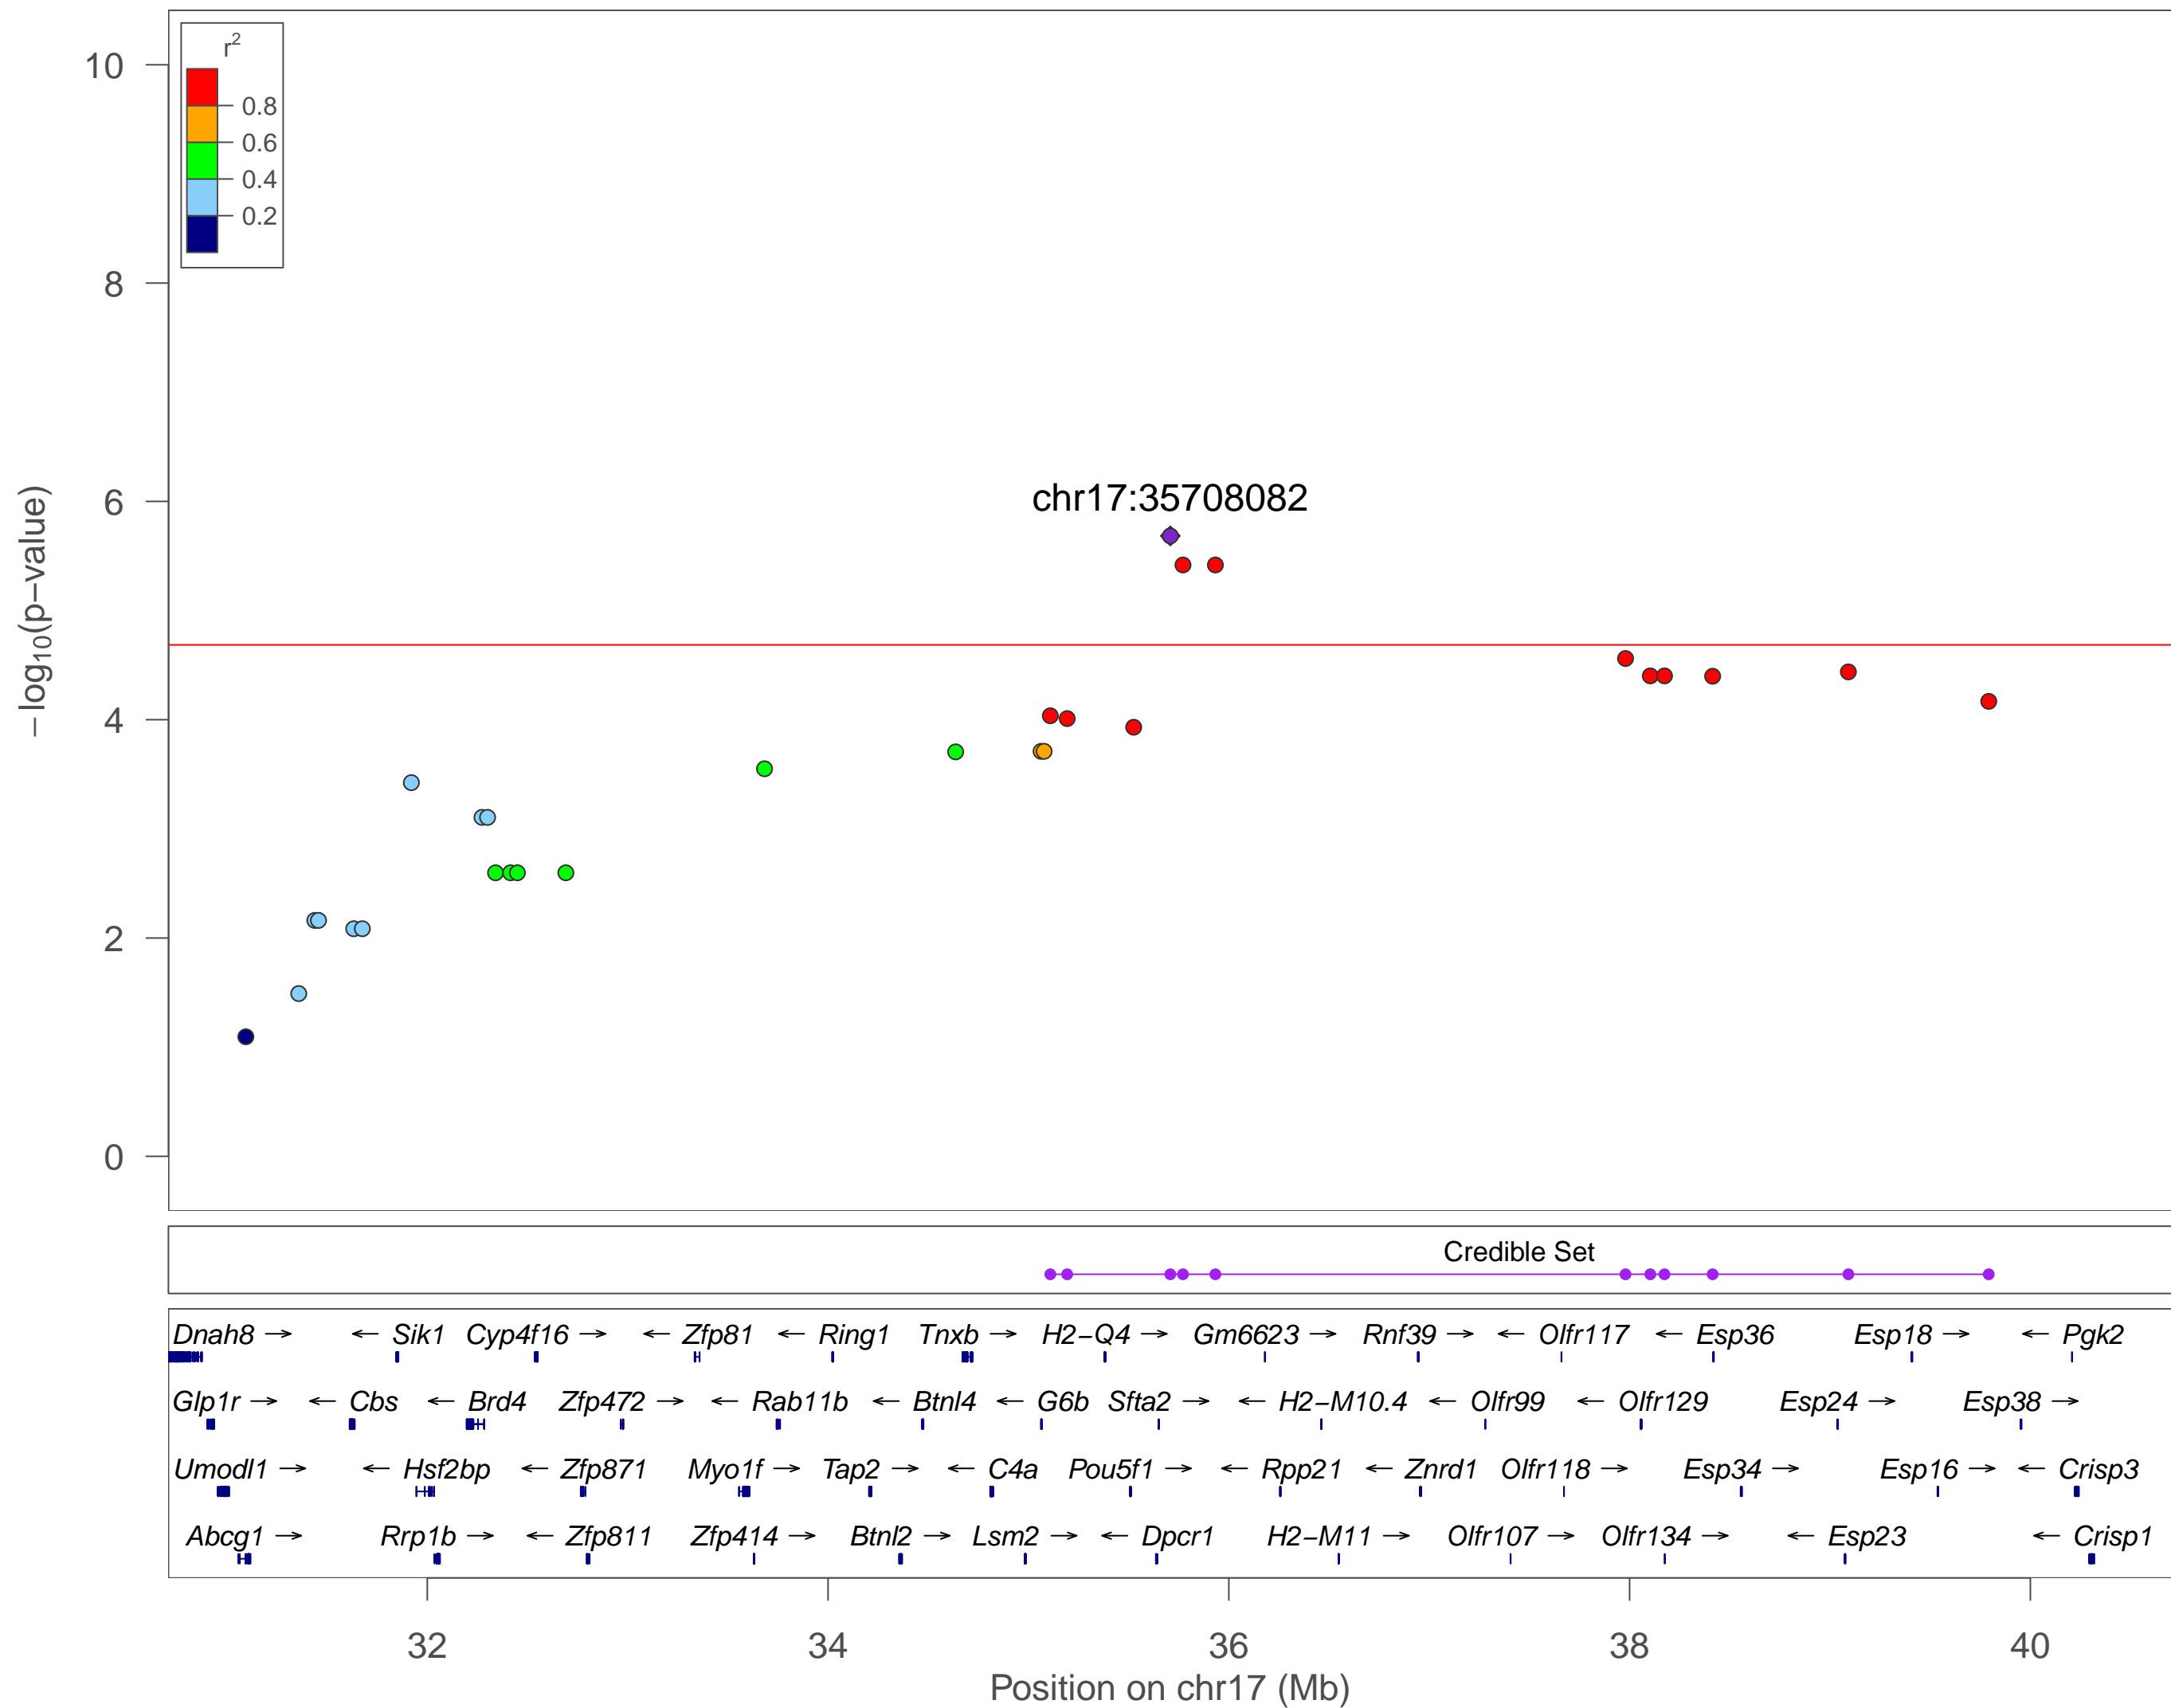

date: Thu Oct 25 16:48:13 2018

build: F34Array

display range: chr17:30708082–40708082 [30708082–40708082]

hilite range: 0 – 0 [ 0 – 0 ]

reference SNP: chr17:35708082

number of SNPs plotted: 30

min P-value: 2.07E–6 [chr17:35708082]

max P-value: 8.03E–2 [chr17:31094466]

omitted Genes: Tff3, Tff2, LOC102631757

omitted Genes: Tff1, Tmprss3, Ubash3a

omitted Genes: Rsph1, Slc37a1, Pde9a

omitted Genes: Wdr4, Ndufv3, Pknox1

omitted Genes: U2af1, Cryaa, Pdxk-ps

omitted Genes: Notch3, Ephx3, Gm4432

omitted Genes: Akap8, Akap8l, Wiz

omitted Genes: Rasal3, A530088E08Rik, Pglyrp2

omitted Genes: Cyp4f39, Cyp4f17, Cyp4f37

omitted Genes: Cyp4f40, Cyp4f15, Zfp799

omitted Genes: Zfp870, Cyp4f14, Cyp4f13

omitted Genes: Cyp4f41-ps, Zfp952, Zfp763

omitted Genes: 4921501E09Rik, Zfp563, Morc2b

omitted Genes: Olfr55, Olfr239, Gm4461

omitted Genes: Zfp955a, Olfr63, Zfp955b

omitted Genes: Zfp101, Actl9, Adamts10

omitted Genes: Pram1, Hnrnpm, March2

omitted Genes: Angptl4, Kank3, Rps28

omitted Genes: Ndufa7, Cd320, Kifc1

omitted Genes: Gm27740, Platr17, BC051226

omitted Genes: Daxx, Zbtb22, Tapbp

omitted Genes: Rgl2, Pfdn6, Wdr46

omitted Genes: B3galt4, Rps18, Vps52

omitted Genes: H2-K2, AA388235, H2-K1

omitted Genes: Mir219a-1, Mir219c, H2-Ke6

omitted Genes: Slc39a7, Rxrb, Col11a2

omitted Genes: BC051537, H2-Oa, Brd2

omitted Genes: H2-DMa, H2-DMb2, H2-DMb1

omitted Genes: Psmb9, Tap1, Psmb8

omitted Genes: H2-Ob, H2-Ab1, H2-Aa

omitted Genes: H2-Eb1, H2-Ep2, Btln1

omitted Genes: BC051143, Btln5, ps, Btln6

Make more plots at <http://csg.sph.umich.edu/locuszoom/>

Fine-mapping Regions

| snp            | chr | pos (Mb) | pp         | group        | color  |
|----------------|-----|----------|------------|--------------|--------|
| chr17:35109063 | 17  | 35.10906 | 0.01054350 | Credible Set | purple |
| chr17:35193207 | 17  | 35.19321 | 0.00996709 | Credible Set | purple |
| chr17:35708082 | 17  | 35.70808 | 0.39239080 | Credible Set | purple |
| chr17:35771114 | 17  | 35.77111 | 0.21807460 | Credible Set | purple |
| chr17:35932844 | 17  | 35.93284 | 0.21807460 | Credible Set | purple |
| chr17:37979659 | 17  | 37.97966 | 0.03314126 | Credible Set | purple |
| chr17:38103272 | 17  | 38.10327 | 0.02339890 | Credible Set | purple |
| chr17:38174076 | 17  | 38.17408 | 0.02339890 | Credible Set | purple |
| chr17:38414260 | 17  | 38.41426 | 0.02322488 | Credible Set | purple |
| chr17:39091675 | 17  | 39.09168 | 0.02533380 | Credible Set | purple |
| chr17:39792213 | 17  | 39.79221 | 0.01405672 | Credible Set | purple |

# F34 Array, retic parameters cell hemoglobin distribution width

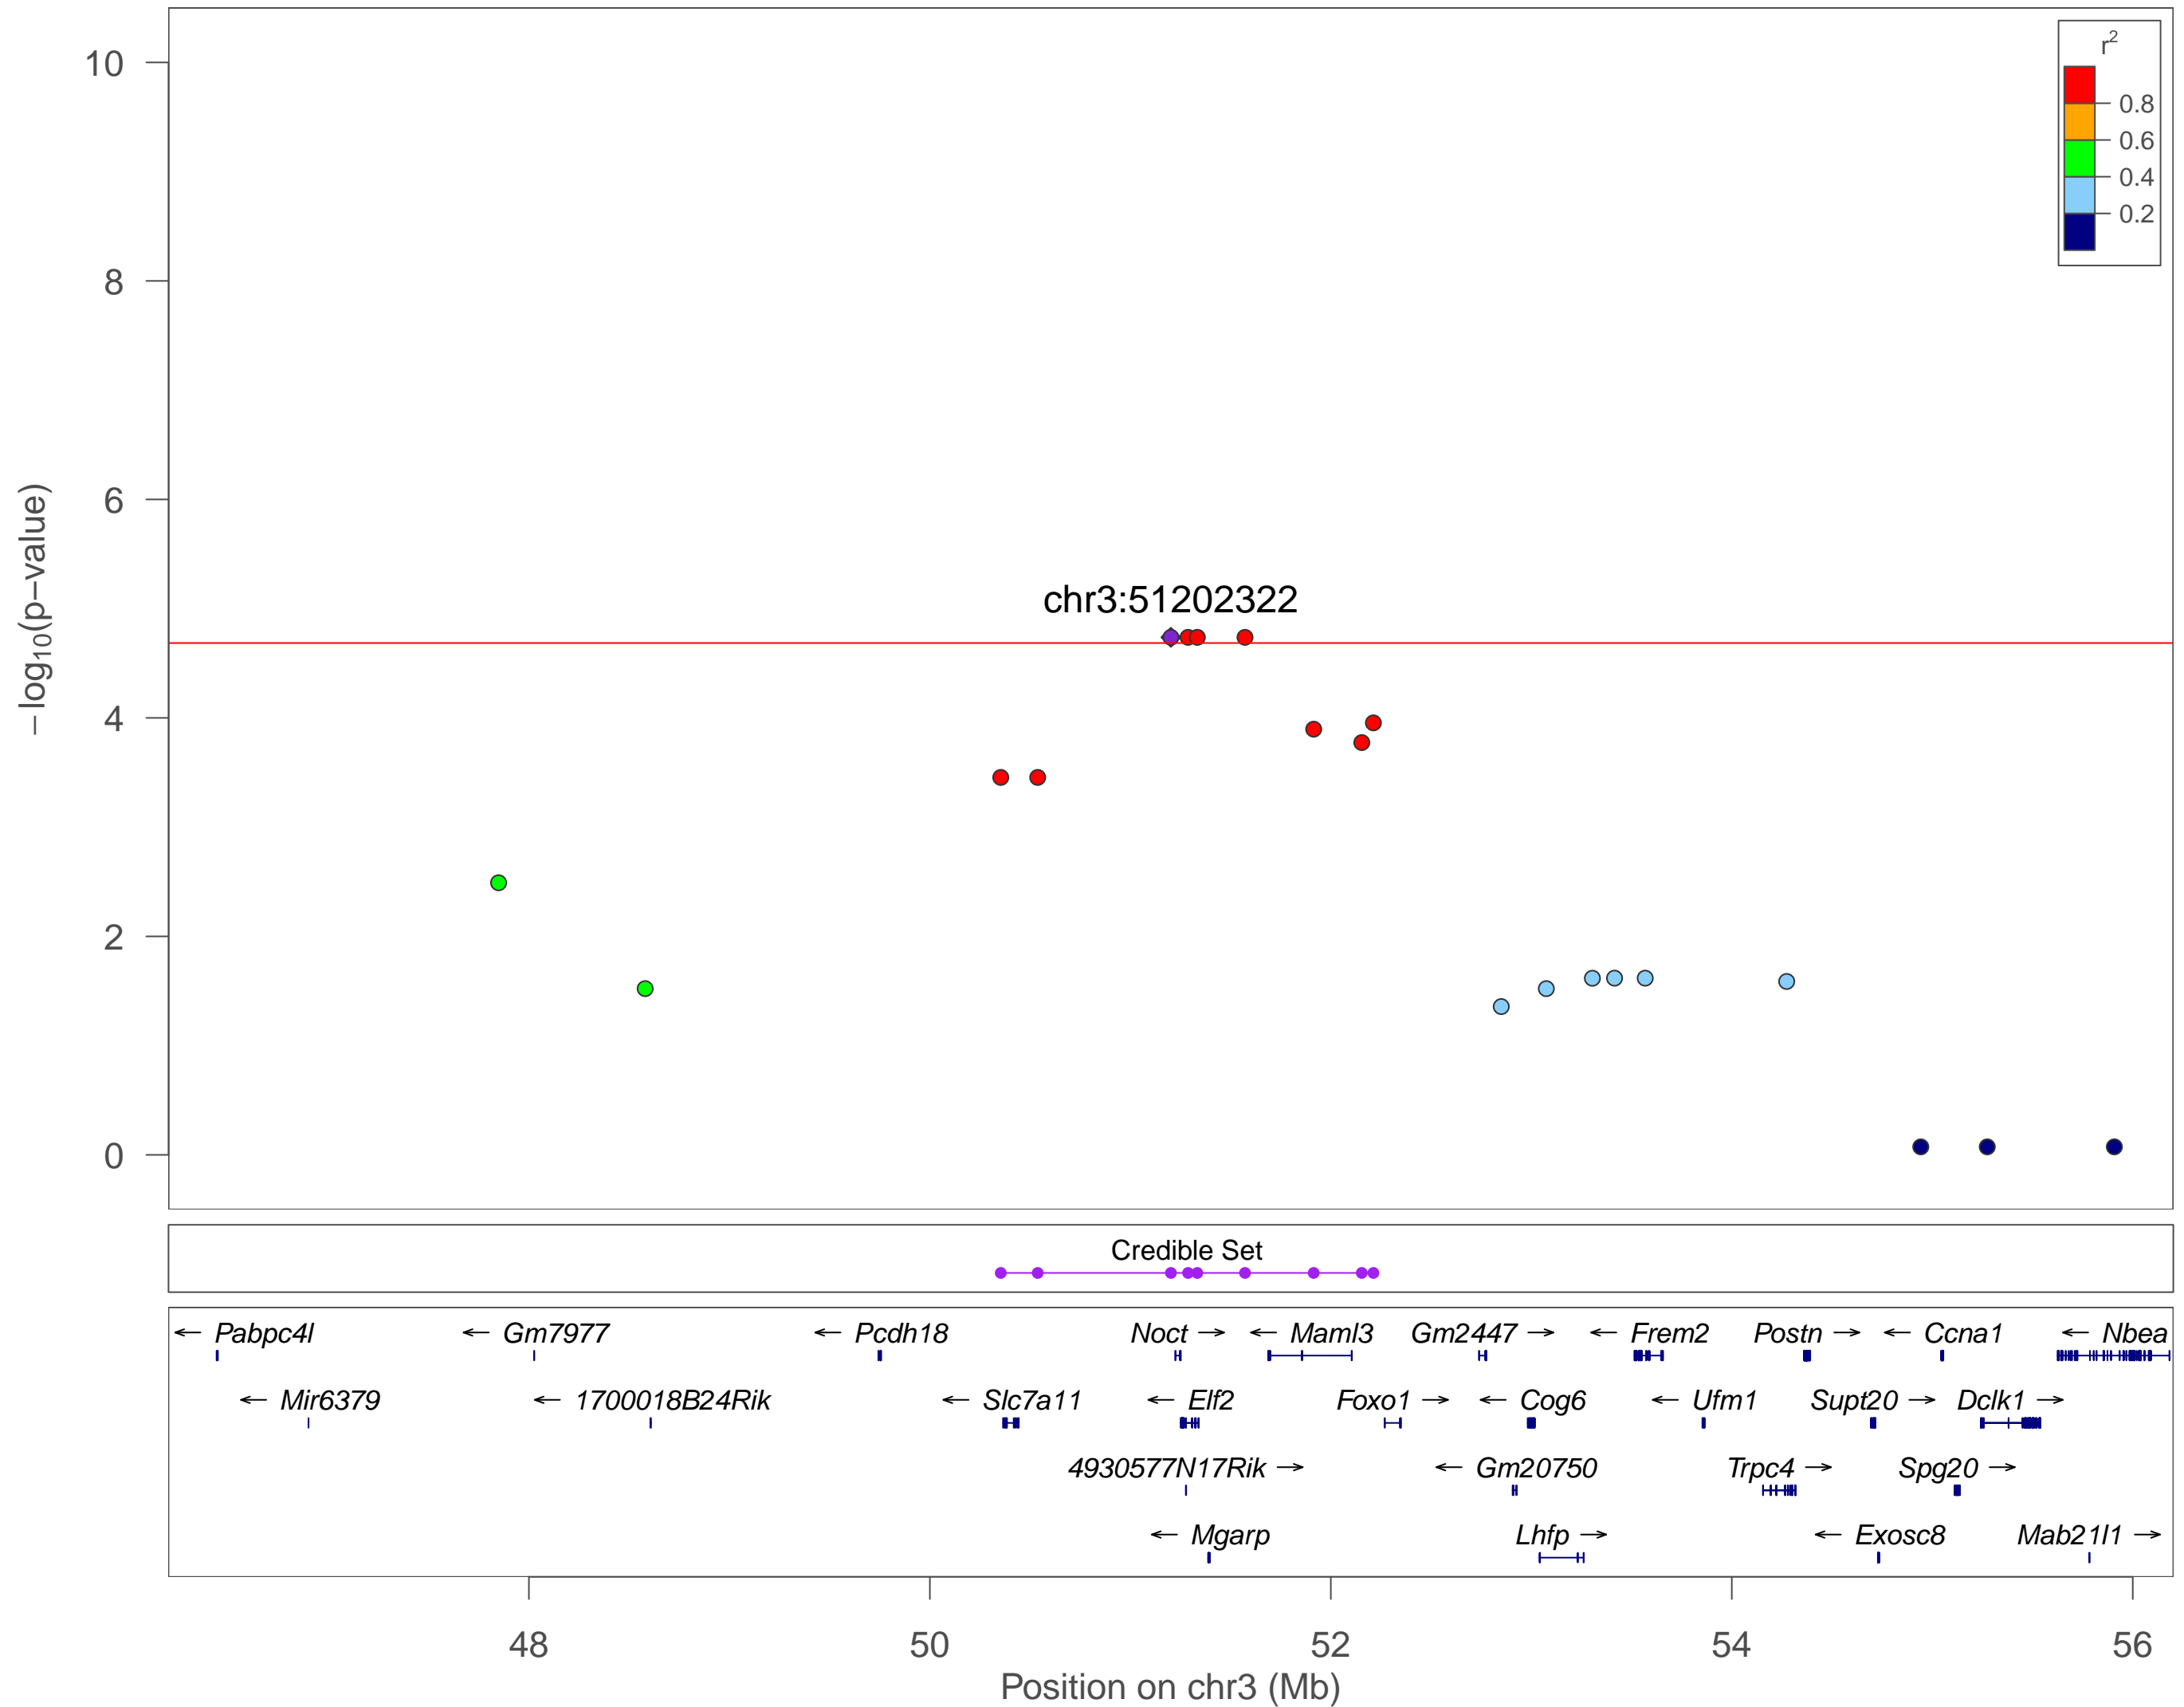

date: Thu Oct 25 16:49:06 2018

build: F34Array

display range: chr3:46202322–56202322 [46202322–56202322]

hilite range: 0 – 0 [ 0 – 0 ]

reference SNP: chr3:51202322

number of SNPs plotted: 21

min P-value: 1.83E–5 [chr3:51202322]

max P-value: 8.44E–1 [chr3:54942736]

omitted Genes: Ndufc1, Naa15, Rab33b

omitted Genes: Setd7, 5031434O11Rik, Mgst2

omitted Genes: Nhlrc3, Proser1, Stoml3

omitted Genes: Alg5, Smad9, Rfxap

omitted Genes: Sertm1, 4931419H13Rik, Ccdc169

omitted Genes: Sohlh2, 4933417G07Rik

Fine-mapping Regions

| snp           | chr | pos (Mb) | pp         | group        | color  |
|---------------|-----|----------|------------|--------------|--------|
| chr3:50353748 | 3   | 50.35375 | 0.01339687 | Credible Set | purple |
| chr3:50537878 | 3   | 50.53788 | 0.01339687 | Credible Set | purple |
| chr3:51202322 | 3   | 51.20232 | 0.21806426 | Credible Set | purple |
| chr3:51287862 | 3   | 51.28786 | 0.21806426 | Credible Set | purple |
| chr3:51333971 | 3   | 51.33397 | 0.21806426 | Credible Set | purple |
| chr3:51571920 | 3   | 51.57192 | 0.21806426 | Credible Set | purple |
| chr3:51914573 | 3   | 51.91457 | 0.03481626 | Credible Set | purple |
| chr3:52154479 | 3   | 52.15448 | 0.02667820 | Credible Set | purple |
| chr3:52212374 | 3   | 52.21237 | 0.03945476 | Credible Set | purple |

F34 Array, retic parameters cell hemoglobin distribution width

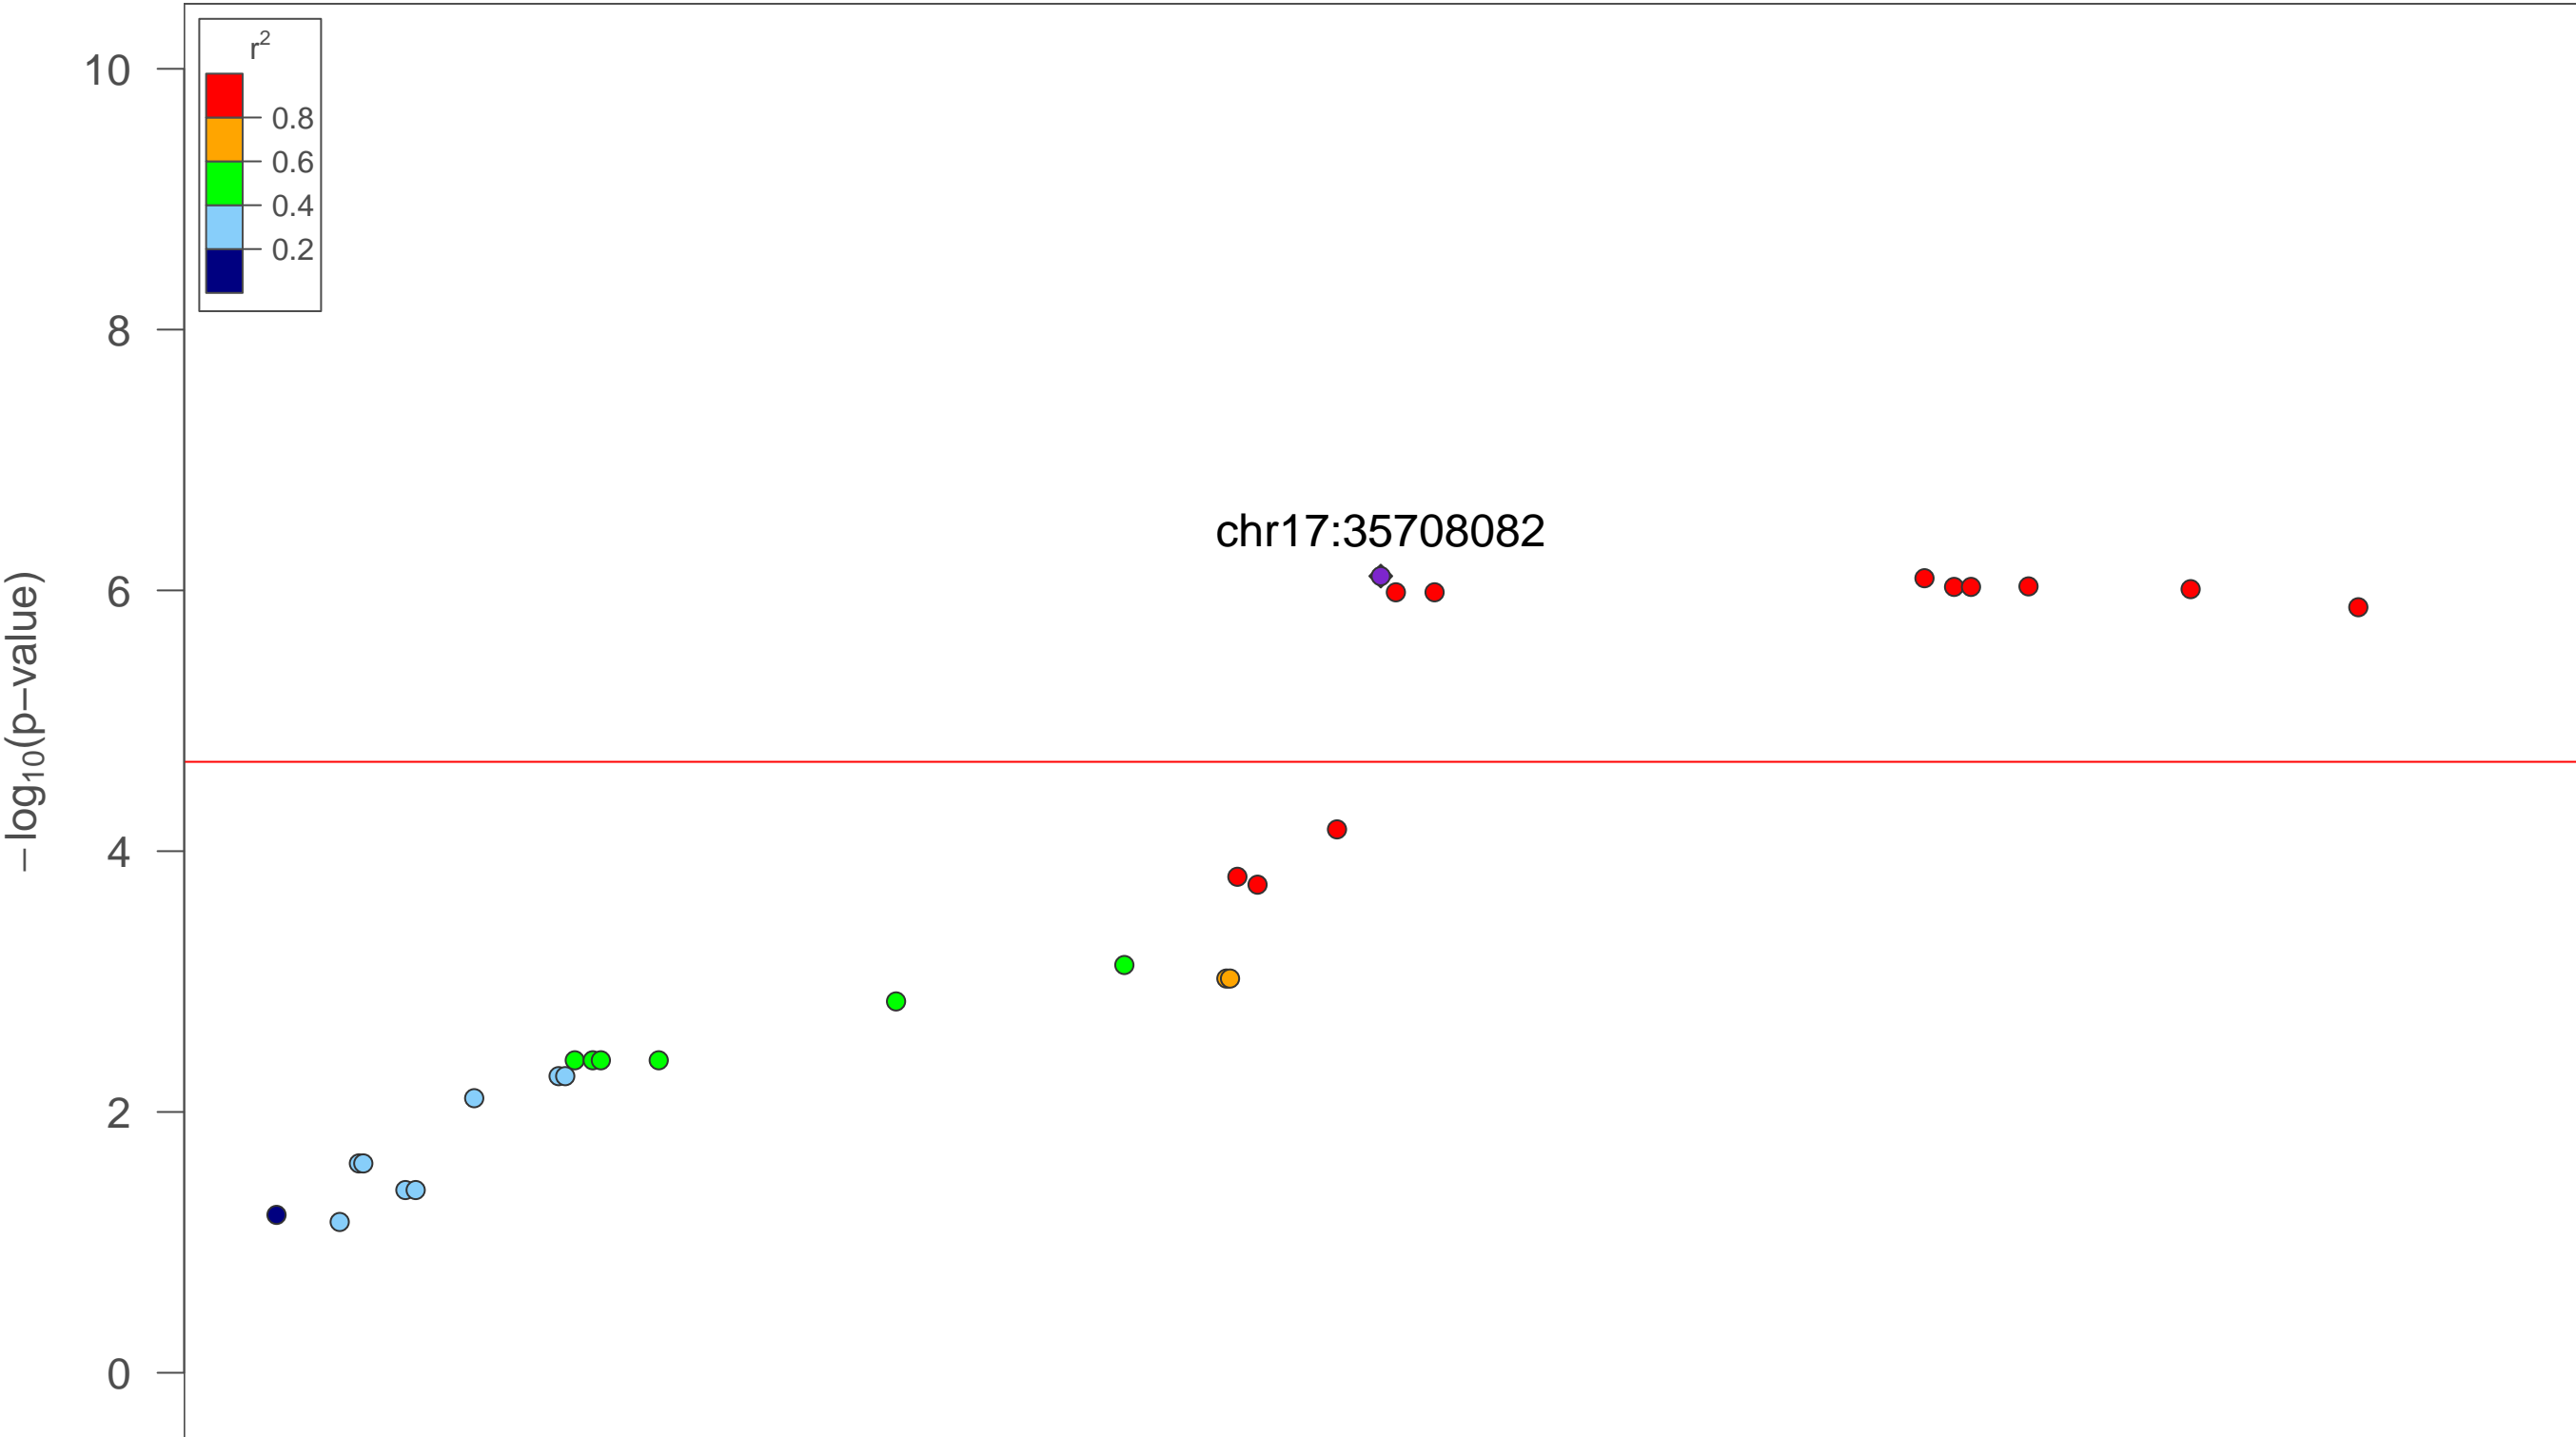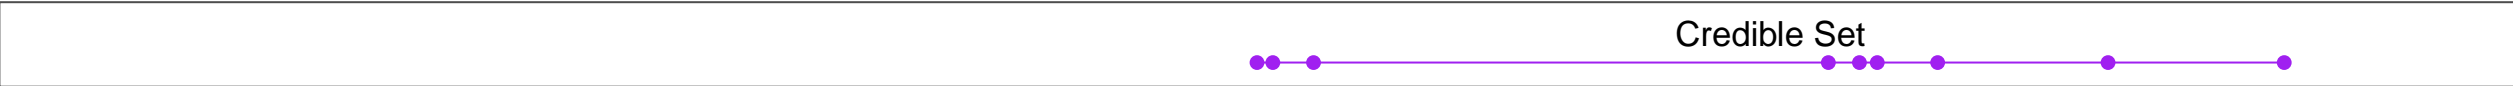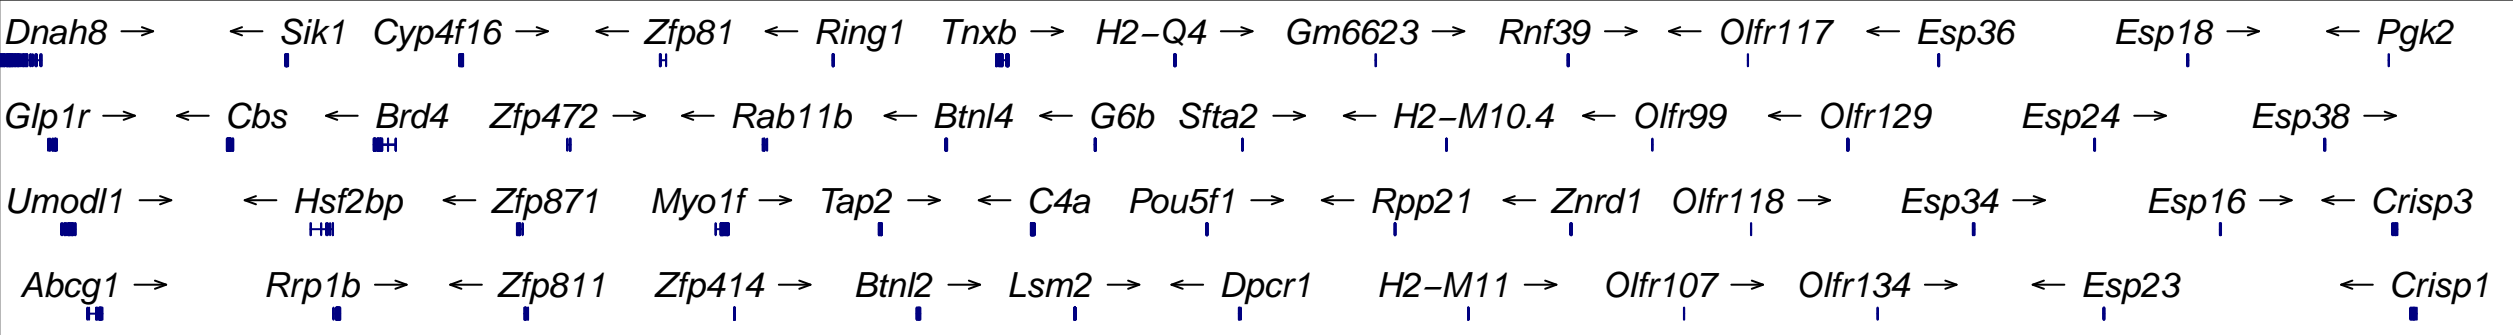

279 genes  
omitted



date: Thu Oct 25 16:49:00 2018

build: F34Array

display range: chr17:30708082–40708082 [30708082–40708082]

hilite range: 0 – 0 [ 0 – 0 ]

reference SNP: chr17:35708082

number of SNPs plotted: 30

min P-value: 7.77E-7 [chr17:35708082]

max P-value: 6.97E-2 [chr17:31358358]

omitted Genes: Tff3, Tff2, LOC102631757

omitted Genes: Tff1, Tmprss3, Ubash3a

omitted Genes: Rsph1, Slc37a1, Pde9a

omitted Genes: Wdr4, Ndufv3, Pknox1

omitted Genes: U2af1, Cryaa, Pdxk-ps

omitted Genes: Notch3, Ephx3, Gm4432

omitted Genes: Akap8, Akap8l, Wiz

omitted Genes: Rasal3, A530088E08Rik, Pglyrp2

omitted Genes: Cyp4f39, Cyp4f17, Cyp4f37

omitted Genes: Cyp4f40, Cyp4f15, Zfp799

omitted Genes: Zfp870, Cyp4f14, Cyp4f13

omitted Genes: Cyp4f41-ps, Zfp952, Zfp763

omitted Genes: 4921501E09Rik, Zfp563, Morc2b

omitted Genes: Olfr55, Olfr239, Gm4461

omitted Genes: Zfp955a, Olfr63, Zfp955b

omitted Genes: Zfp101, Actl9, Adamts10

omitted Genes: Pram1, Hnrnpm, March2

omitted Genes: Angptl4, Kank3, Rps28

omitted Genes: Ndufa7, Cd320, Kifc1

omitted Genes: Gm27740, Platr17, BC051226

omitted Genes: Daxx, Zbtb22, Tapbp

omitted Genes: Rgl2, Pfdn6, Wdr46

omitted Genes: B3galt4, Rps18, Vps52

omitted Genes: H2-K2, AA388235, H2-K1

omitted Genes: Mir219a-1, Mir219c, H2-Ke6

omitted Genes: Slc39a7, Rxrb, Col11a2

omitted Genes: BC051537, H2-Oa, Brd2

omitted Genes: H2-DMa, H2-DMb2, H2-DMb1

omitted Genes: Psmb9, Tap1, Psmb8

omitted Genes: H2-Ob, H2-Ab1, H2-Aa

omitted Genes: H2-Eb1, H2-Ep2, Btln1

omitted Genes: BC051143, Btln5, ps, Btln6

Make more plots at <http://csg.sph.umich.edu/locuszoom/>

Fine-mapping Regions

| snp            | chr | pos (Mb) | pp         | group        | color  |
|----------------|-----|----------|------------|--------------|--------|
| chr17:35708082 | 17  | 35.70808 | 0.13502166 | Credible Set | purple |
| chr17:35771114 | 17  | 35.77111 | 0.10257697 | Credible Set | purple |
| chr17:35932844 | 17  | 35.93284 | 0.10257697 | Credible Set | purple |
| chr17:37979659 | 17  | 37.97966 | 0.13031025 | Credible Set | purple |
| chr17:38103272 | 17  | 38.10327 | 0.11243731 | Credible Set | purple |
| chr17:38174076 | 17  | 38.17408 | 0.11243731 | Credible Set | purple |
| chr17:38414260 | 17  | 38.41426 | 0.11339820 | Credible Set | purple |
| chr17:39091675 | 17  | 39.09168 | 0.10819998 | Credible Set | purple |
| chr17:39792213 | 17  | 39.79221 | 0.07956072 | Credible Set | purple |

# F34 Array, retic parameters red cell distribution width

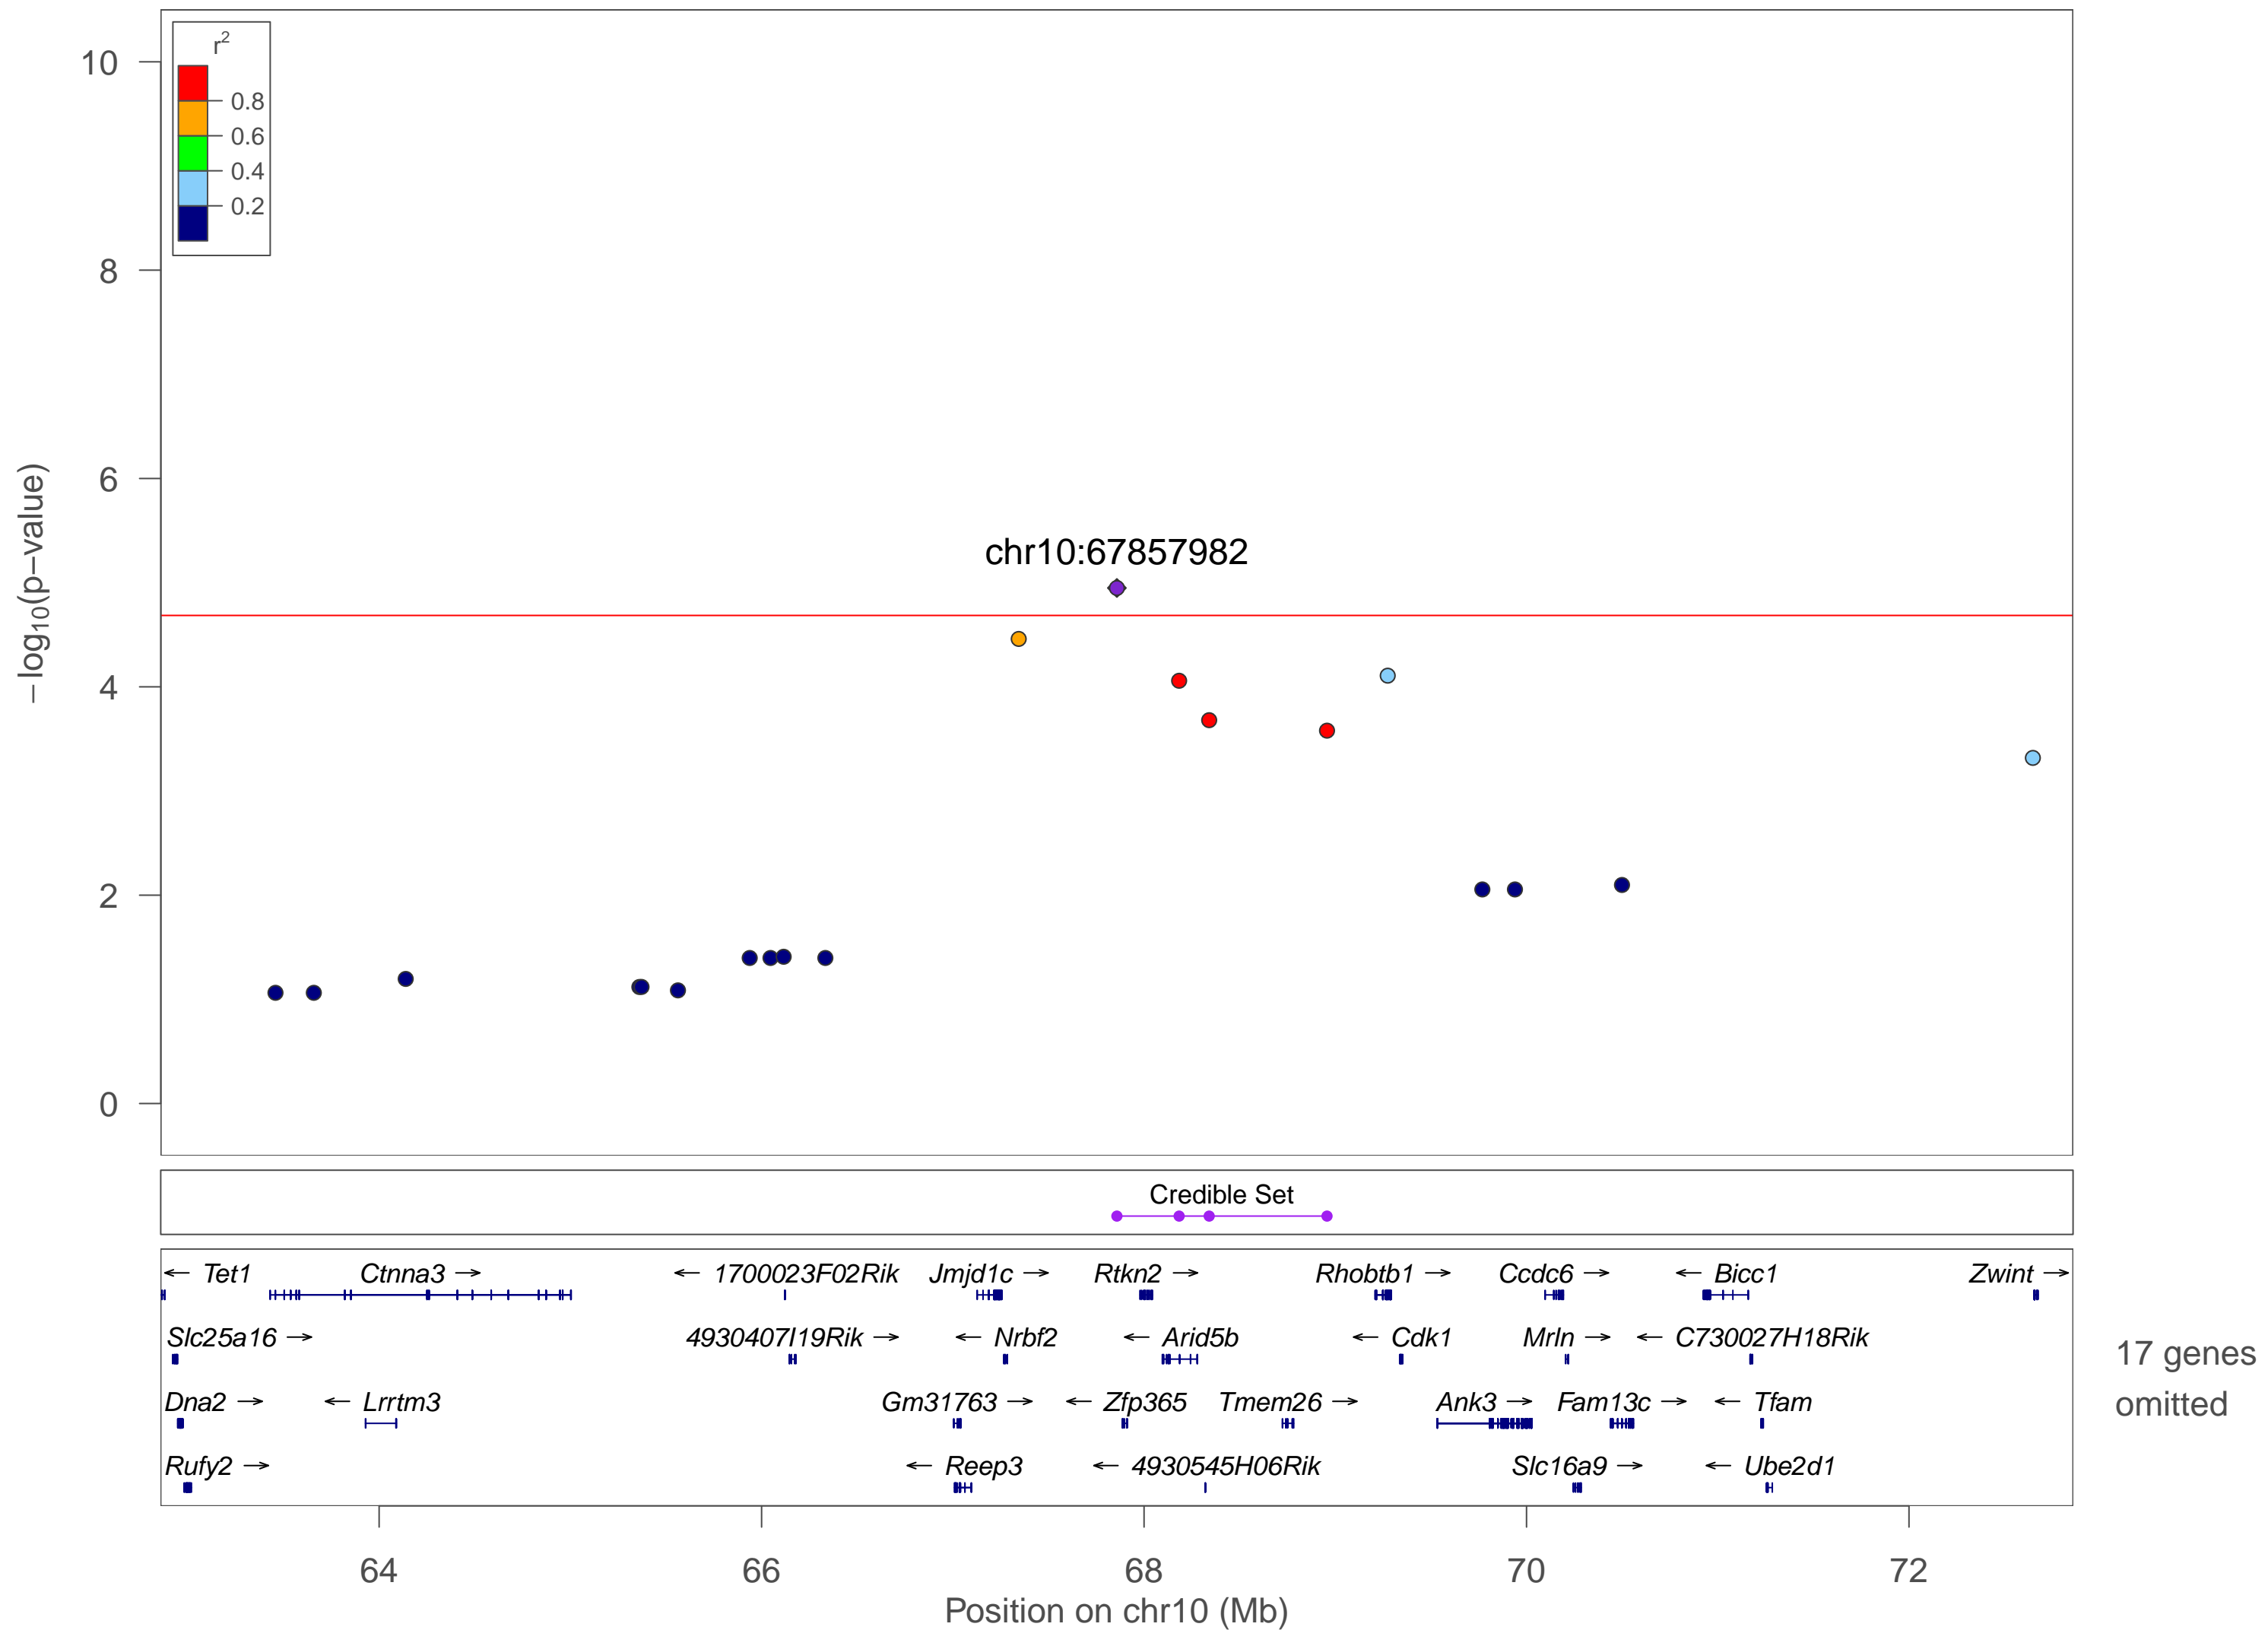

date: Thu Oct 25 16:49:14 2018

build: F34Array

display range: chr10:62857982–72857982 [62857982–72857982]

hilite range: 0 – 0 [ 0 – 0 ]

reference SNP: chr10:67857982

number of SNPs plotted: 21

min P-value: 1.12E–5 [chr10:67857982]

max P-value: 8.65E–2 [chr10:63458094]

omitted Genes: Hnrnph3, Pbld2, Pbld1

omitted Genes: Atoh7, Mypn, Herc4

omitted Genes: Sirt1, Dnajc12, Egr2

omitted Genes: Ado, 1700040L02Rik, Phyhipl

omitted Genes: D630013N20Rik, 1700113B09Rik, Cisd1

omitted Genes: Ipmk, 1700049L16Rik

Fine-mapping Regions

| snp            | chr | pos (Mb) | pp         | group        | color  |
|----------------|-----|----------|------------|--------------|--------|
| chr10:67857982 | 10  | 67.85798 | 0.79629461 | Credible Set | purple |
| chr10:68183490 | 10  | 68.18349 | 0.11355990 | Credible Set | purple |
| chr10:68340621 | 10  | 68.34062 | 0.04993989 | Credible Set | purple |
| chr10:68956755 | 10  | 68.95676 | 0.04020560 | Credible Set | purple |

F34 Array, retic parameters hemoglobin distribution width

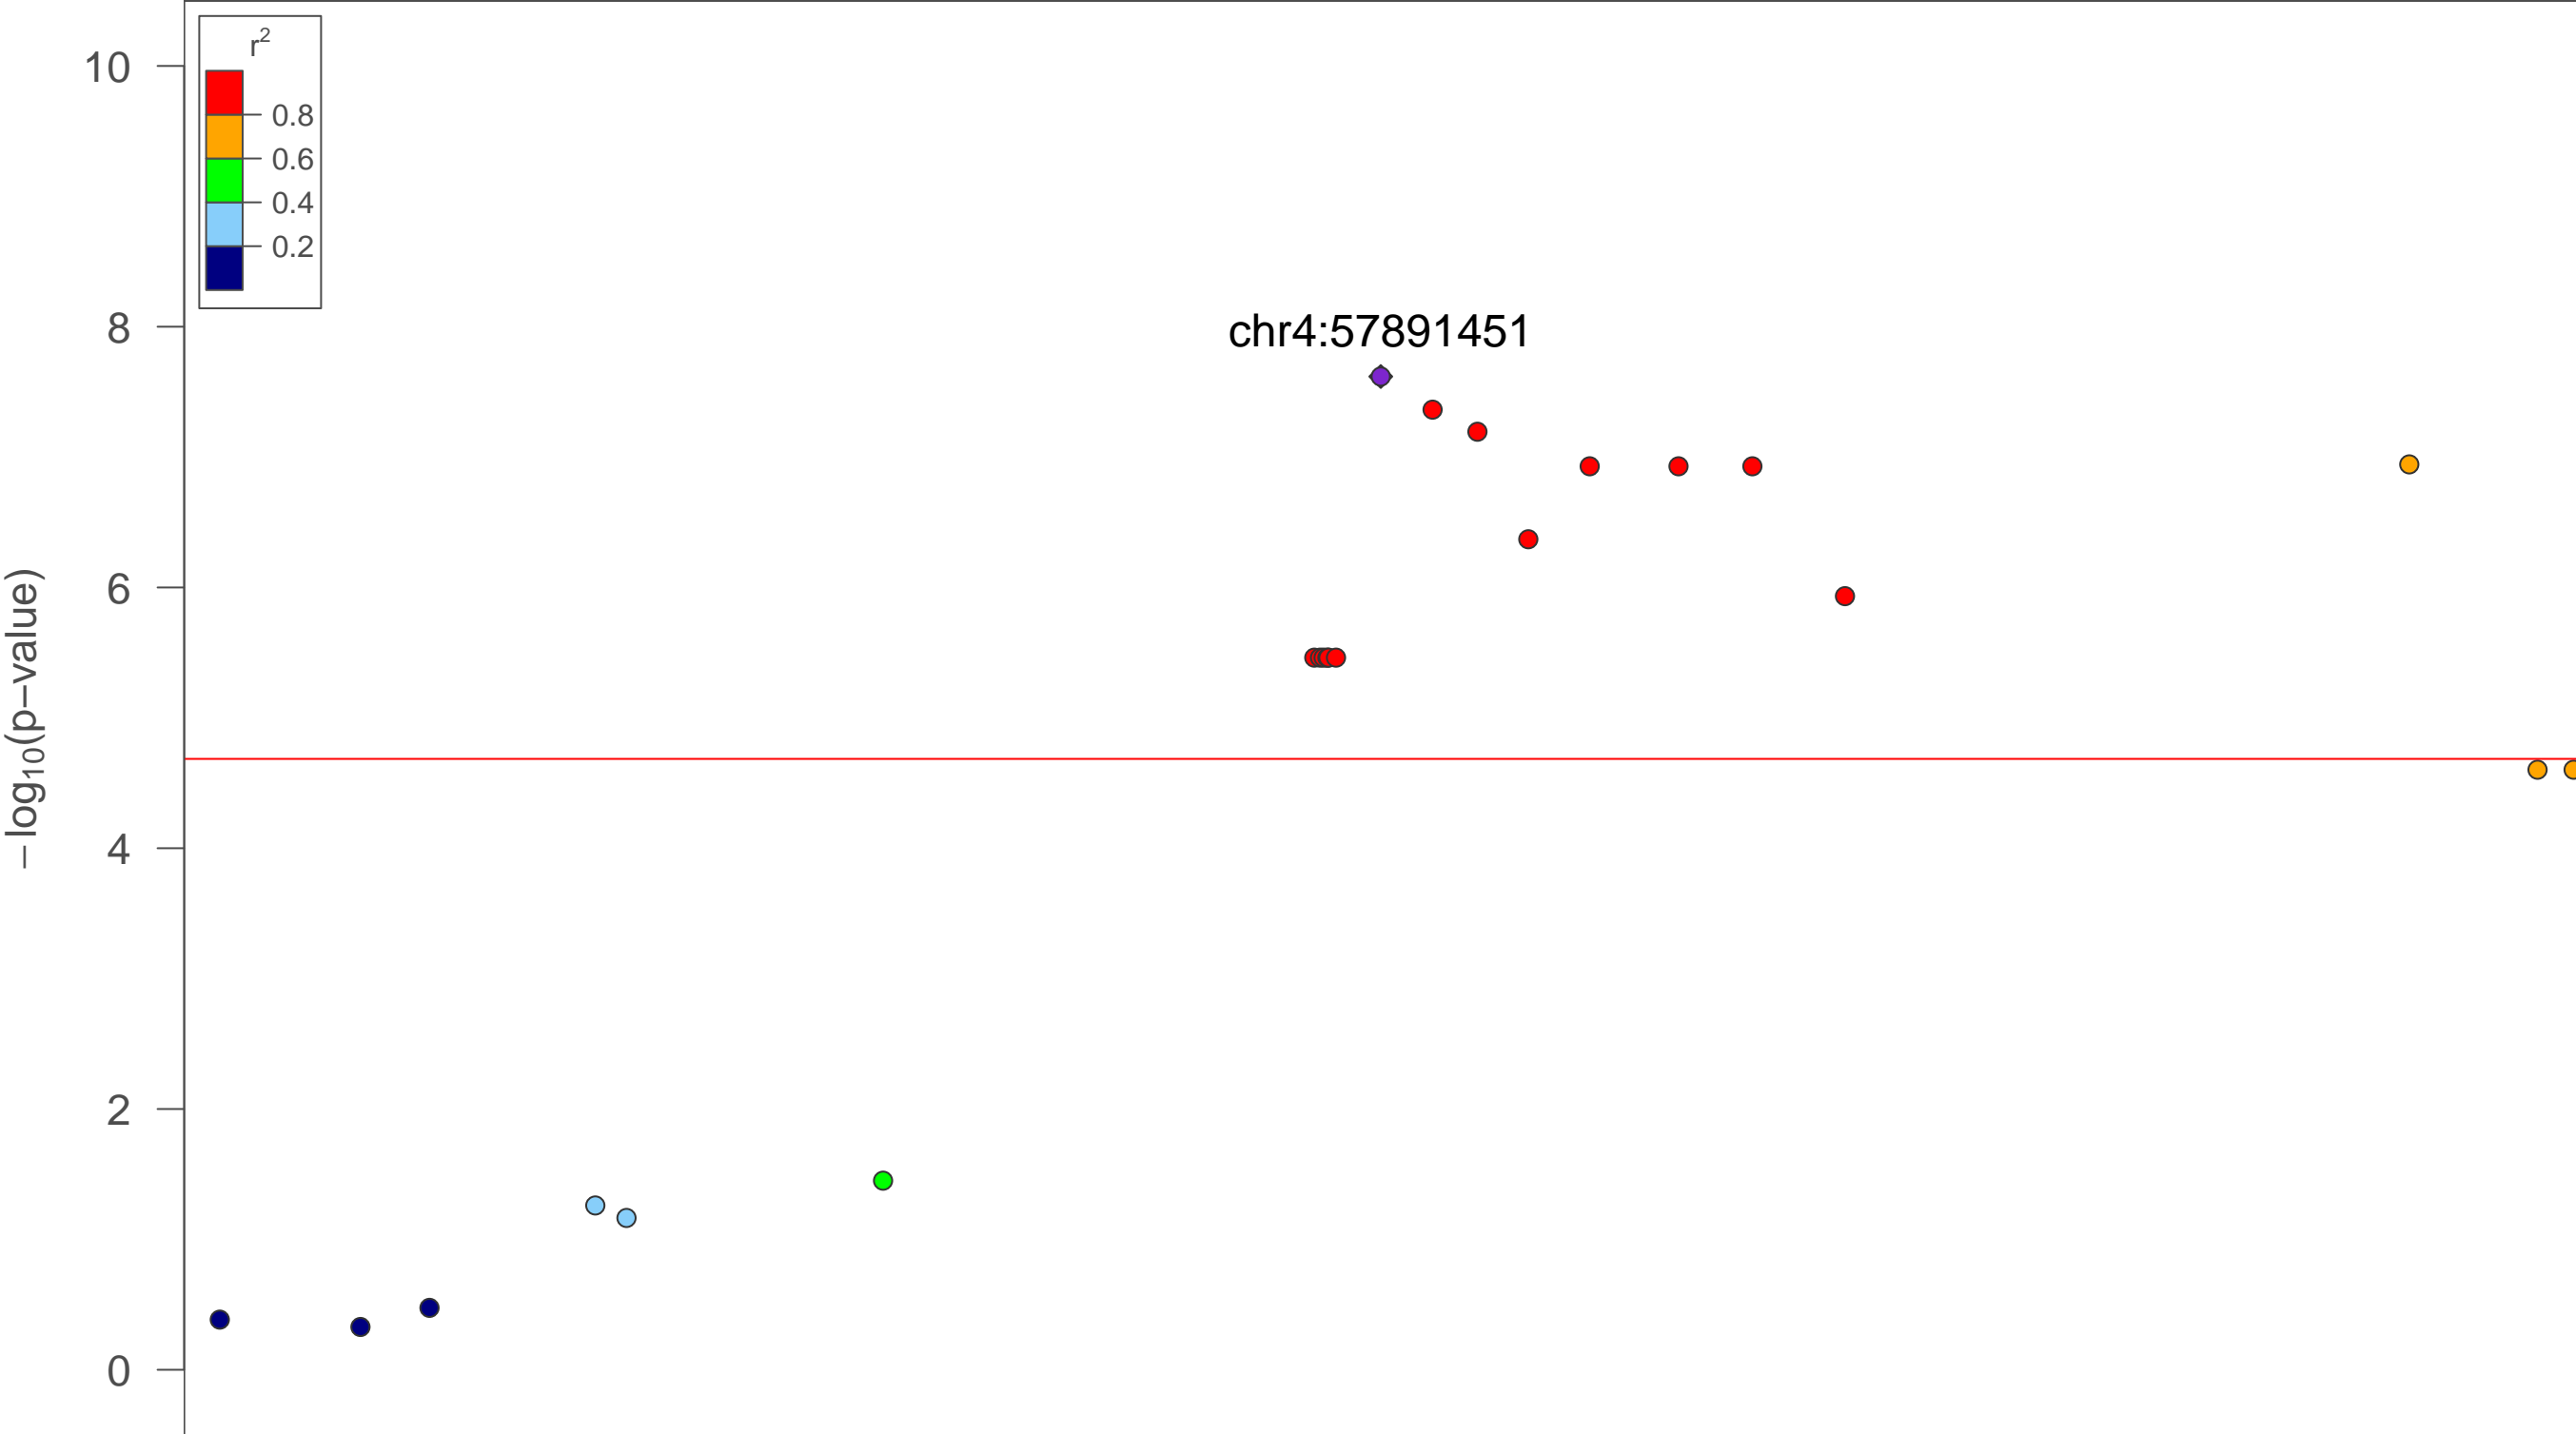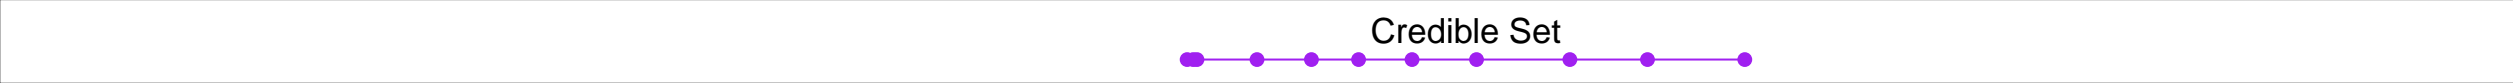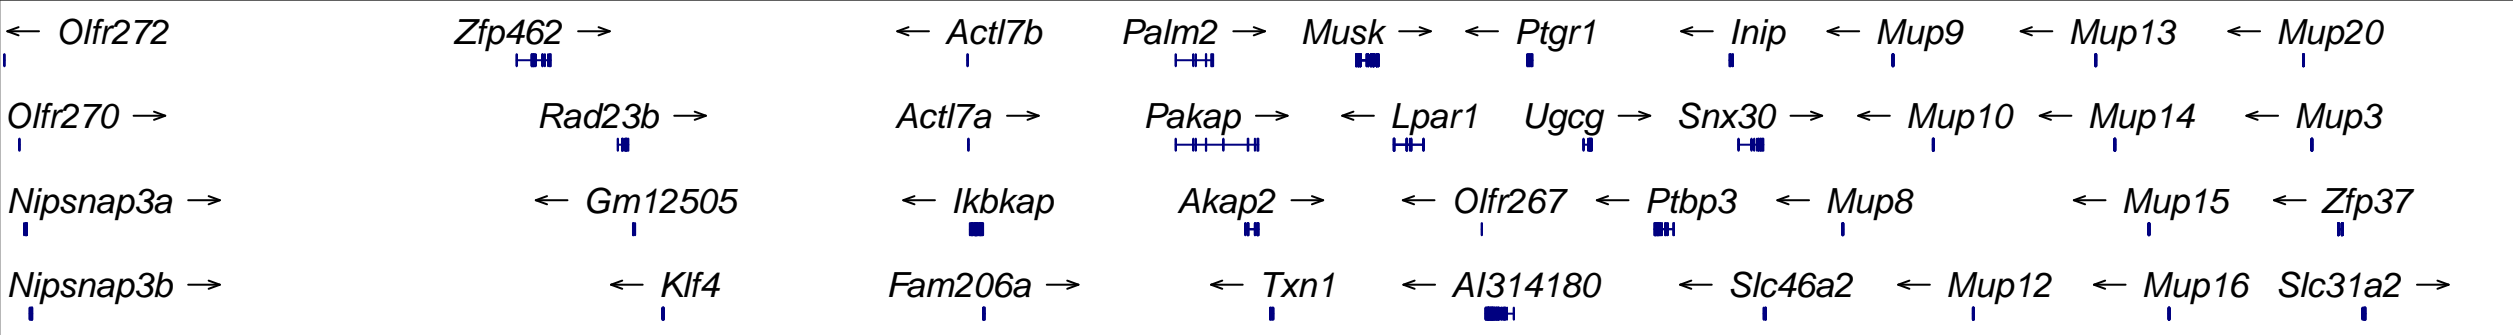

50 genes omitted

date: Thu Oct 25 16:49:21 2018  
build: F34Array  
display range: chr4:52891451–62891451 [52891451–62891451]  
hilite range: 0 – 0 [ 0 – 0 ]  
reference SNP: chr4:57891451  
number of SNPs plotted: 24  
min P-value: 2.41E–8 [chr4:57891451]  
max P-value: 4.69E–1 [chr4:53628462]  
omitted Genes: Abca1, 4930522O17Rik, AI427809  
omitted Genes: Slc44a1, Fsd1l, Fktn  
omitted Genes: Tal2, Tmem38b, Ctnnal1  
omitted Genes: Tmem245, Mir32, Frrs1l  
omitted Genes: Epb41l4b, Gm12530, Ptpn3  
omitted Genes: 1700042G15Rik, D630039A03Rik, Txndc8  
omitted Genes: Sveg1, Mir3095, Zkscan16  
omitted Genes: Dnajc25, Gng10, Gm12596  
omitted Genes: Susd1, Hsd12, E130308A19Rik  
omitted Genes: Mup4, Mup6, Mup7  
omitted Genes: Mup2, Mup1, Mup11  
omitted Genes: Mup17, Mup18, Mup19  
omitted Genes: Mup5, Mup21, Fkbp15  
omitted Genes: Slc31a1, Cdc26, Prpf4  
omitted Genes: Rnf183, Wdr31, Bspry  
omitted Genes: Hdhd3, Alad, Pole3  
omitted Genes: 4933430I17Rik, Rgs3

Fine-mapping Regions

| snp           | chr | pos (Mb) | pp          | group        | color  |
|---------------|-----|----------|-------------|--------------|--------|
| chr4:57613710 | 4   | 57.61371 | 0.003029939 | Credible Set | purple |
| chr4:57637755 | 4   | 57.63775 | 0.003029939 | Credible Set | purple |
| chr4:57652730 | 4   | 57.65273 | 0.003029939 | Credible Set | purple |
| chr4:57891451 | 4   | 57.89145 | 0.365446528 | Credible Set | purple |
| chr4:58107891 | 4   | 58.10789 | 0.207204646 | Credible Set | purple |
| chr4:58295311 | 4   | 58.29531 | 0.141999469 | Credible Set | purple |
| chr4:58507849 | 4   | 58.50785 | 0.022635370 | Credible Set | purple |
| chr4:58764292 | 4   | 58.76429 | 0.078645589 | Credible Set | purple |
| chr4:59135384 | 4   | 59.13538 | 0.078645589 | Credible Set | purple |
| chr4:59443996 | 4   | 59.44400 | 0.078645589 | Credible Set | purple |
| chr4:59830858 | 4   | 59.83086 | 0.008597585 | Credible Set | purple |



# F34 Array, retic parameters mean reticulocyte volume, repeat

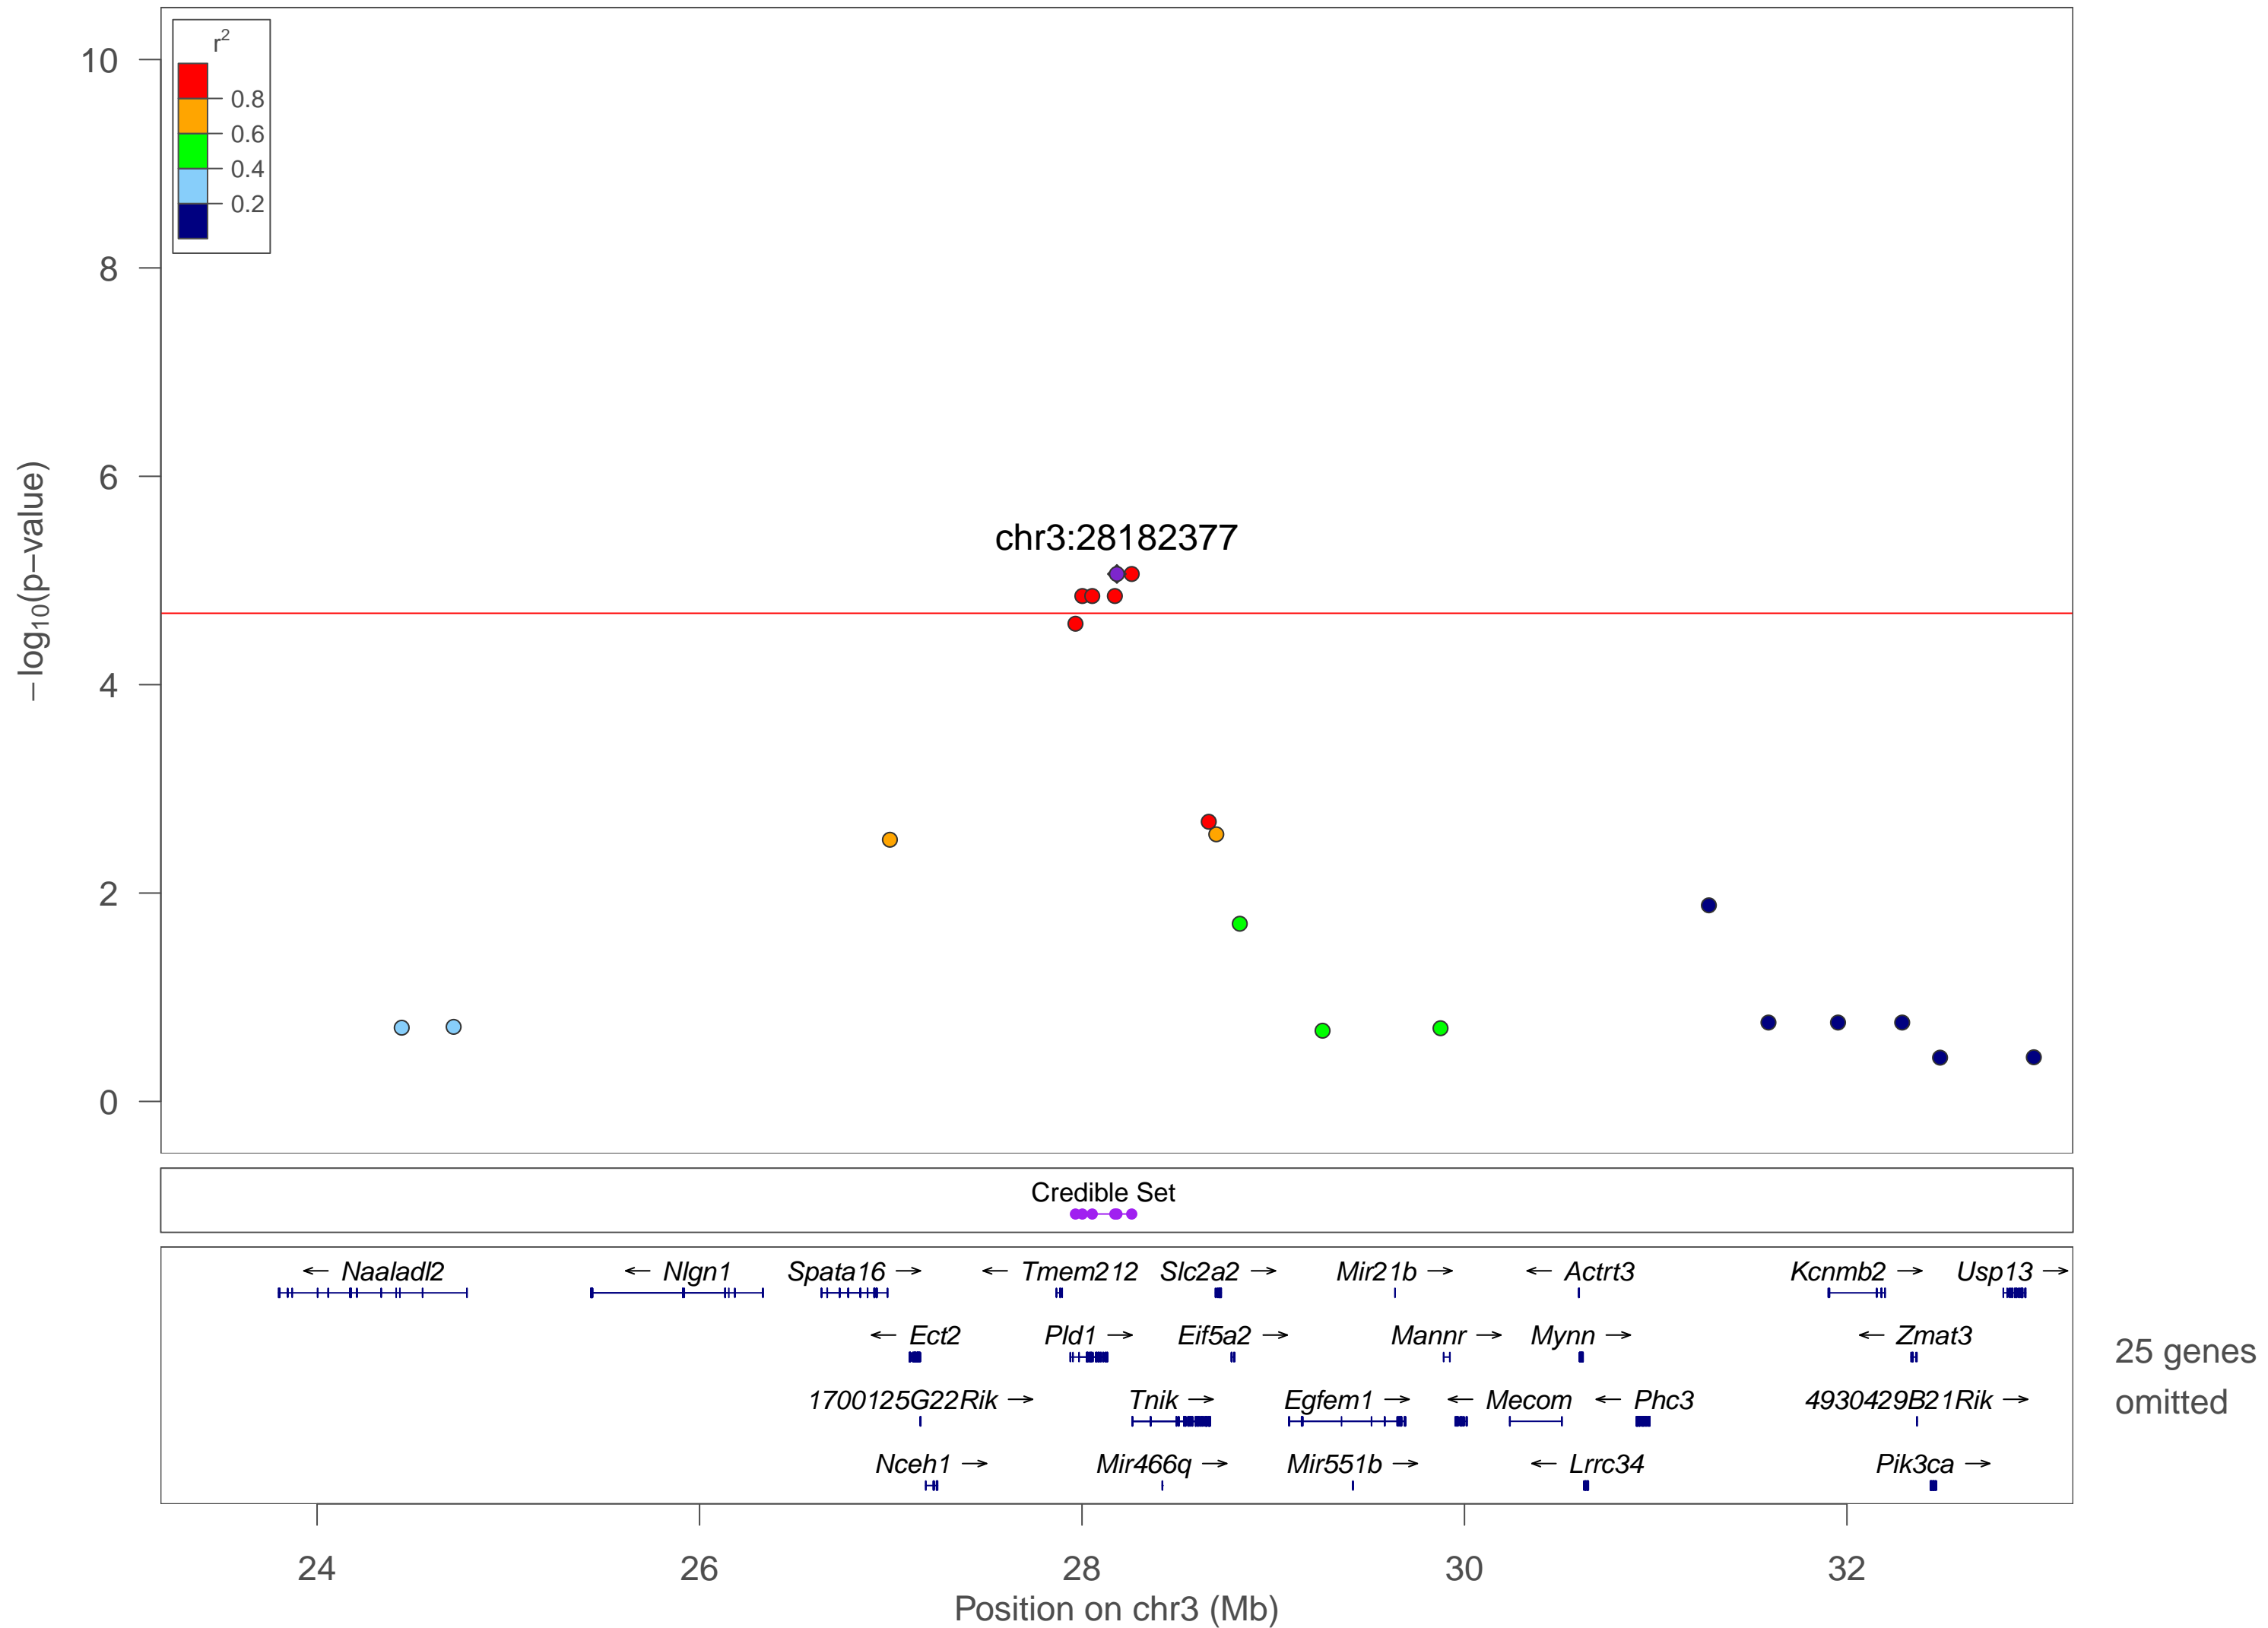

date: Thu Oct 25 16:49:46 2018  
build: F34Array  
display range: chr3:23182377–33182377 [23182377–33182377]  
hilite range: 0 – 0 [ 0 – 0 ]  
reference SNP: chr3:28182377  
number of SNPs plotted: 21  
min P-value: 8.66E–6 [chr3:28182377]  
max P-value: 3.8E–1 [chr3:32486921]  
omitted Genes: Tnfsf10, Ghser, Fndc3b  
omitted Genes: Mir3092, Rpl22l1, Gm1527  
omitted Genes: Lrriq4, Lrrc31, Samd7  
omitted Genes: Sec62, Gpr160, Prkci  
omitted Genes: Mir7008, Skil, Cldn11  
omitted Genes: Slc7a14, Kcnmb3, Zfp639  
omitted Genes: Mfn1, Gnb4, Actl6a  
omitted Genes: Mrpl47, Ndubf5, Pex5l  
omitted Genes: 4930419G24Rik

Fine-mapping Regions

| snp           | chr | pos (Mb) | pp         | group        | color  |
|---------------|-----|----------|------------|--------------|--------|
| chr3:27965717 | 3   | 27.96572 | 0.08266309 | Credible Set | purple |
| chr3:28001696 | 3   | 28.00170 | 0.14814397 | Credible Set | purple |
| chr3:28053395 | 3   | 28.05339 | 0.14814397 | Credible Set | purple |
| chr3:28171809 | 3   | 28.17181 | 0.14814397 | Credible Set | purple |
| chr3:28182377 | 3   | 28.18238 | 0.23576811 | Credible Set | purple |
| chr3:28259887 | 3   | 28.25989 | 0.23576811 | Credible Set | purple |

# F34 Array, retic parameters mean reticulocyte volume, repeat

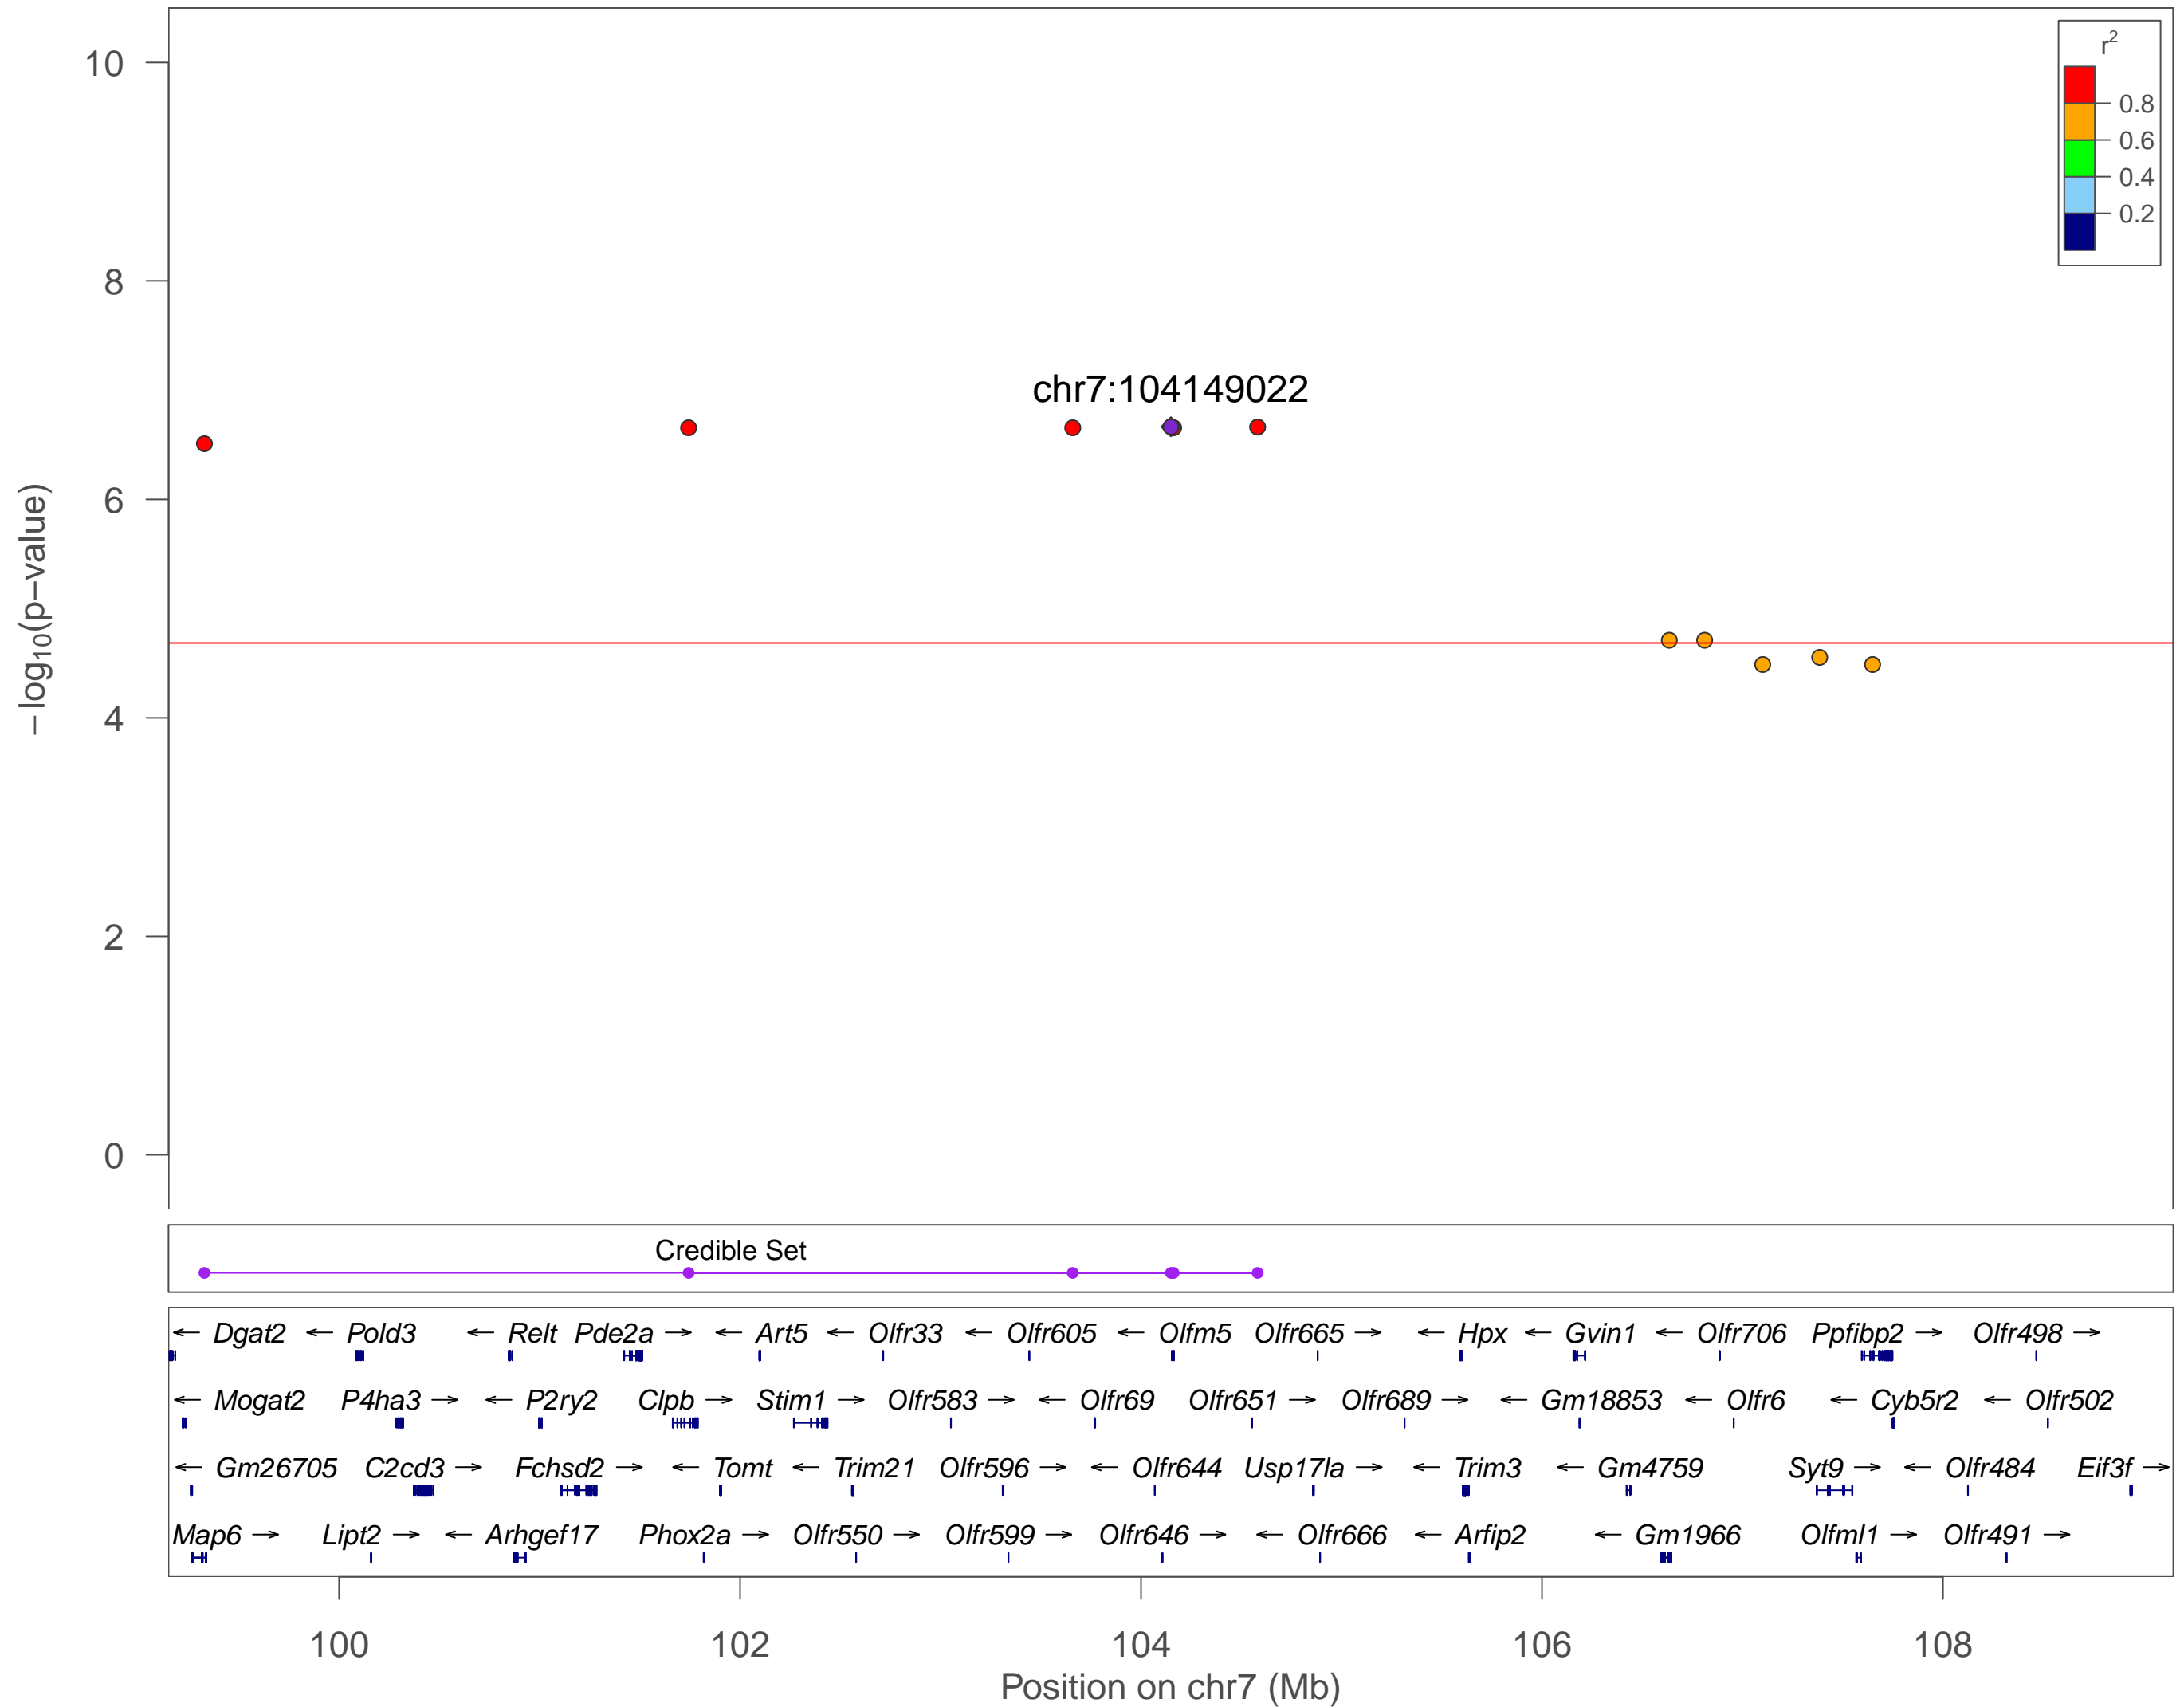

date: Thu Oct 25 16:49:59 2018

build: F34Array

display range: chr7:99149022–109149022 [99149022–109149022]

hilite range: 0 – 0 [ 0 – 0 ]

reference SNP: chr7:104149022

number of SNPs plotted: 12

min P-value: 2.16E–7 [chr7:104149022]

max P-value: 3.24E–5 [chr7:107100725]

omitted Genes: Serpinh1, Gdpd5, Khlh35

omitted Genes: Rps3, Snord15b, Snord15a

omitted Genes: Arrb1, Mir326, Tpbgl

omitted Genes: Slco2b1, Olfr520, Olfr521

omitted Genes: Neu3, Spcs2, Xrra1

omitted Genes: Rnf169, Chrdl2, Kcne3

omitted Genes: Pgm2l1, Gpx2-ps1, Ppme1

omitted Genes: Ucp3, Ucp2, Dnajb13

omitted Genes: Coa4, Mrpl48, Rab6a

omitted Genes: Plekhhb1, Fam168a, Mir3102

omitted Genes: P2ry6, Atg16l2, Stard10

omitted Genes: Arap1, Mir139, Art2a-ps

omitted Genes: Art2b, Inpp1, Folr2

omitted Genes: Folr1, Anapc15, Lamtor1

omitted Genes: Lrrc51, Numa1, Il18bp

omitted Genes: Rnf121, Xndc1, Xntrpc

omitted Genes: Trpc2, Art1, Chrna10

omitted Genes: Nup98, Pgap2, Rhog

omitted Genes: Rrm1, Olfr543, Olfr544

omitted Genes: Olfr545, Olfr547, Olfr549

omitted Genes: Olfr551, Olfr552, Olfr553

omitted Genes: Olfr554, Olfr555, Olfr556

omitted Genes: Trim68, Olfr557, Olfr558

omitted Genes: Olfr559, Olfr78, Olfr560

omitted Genes: Olfr561, Olfr564, Olfr566

omitted Genes: Olfr568, Olfr569, Olfr570

omitted Genes: Olfr571, Olfr572, Olfr574

omitted Genes: Olfr575, Olfr576, Olfr577

omitted Genes: Olfr578, Olfr582, Olfr584

omitted Genes: Olfr585, Olfr586, Olfr589

omitted Genes: Olfr591, Olfr592, Olfr593

omitted Genes: Olfr594, Ucp17ld, Olfr597

Make more plots at <http://csg.sph.umich.edu/locuszoom/>

Fine-mapping Regions

| snp            | chr | pos (Mb)  | pp        | group        | color  |
|----------------|-----|-----------|-----------|--------------|--------|
| chr7:99328376  | 7   | 99.32838  | 0.1256159 | Credible Set | purple |
| chr7:101743401 | 7   | 101.74340 | 0.1736837 | Credible Set | purple |
| chr7:103659355 | 7   | 103.65936 | 0.1736837 | Credible Set | purple |
| chr7:104149022 | 7   | 104.14902 | 0.1770891 | Credible Set | purple |
| chr7:104162444 | 7   | 104.16244 | 0.1736837 | Credible Set | purple |
| chr7:104581631 | 7   | 104.58163 | 0.1762440 | Credible Set | purple |

F34 Array, retic parameters mean reticulocyte volume, repeat

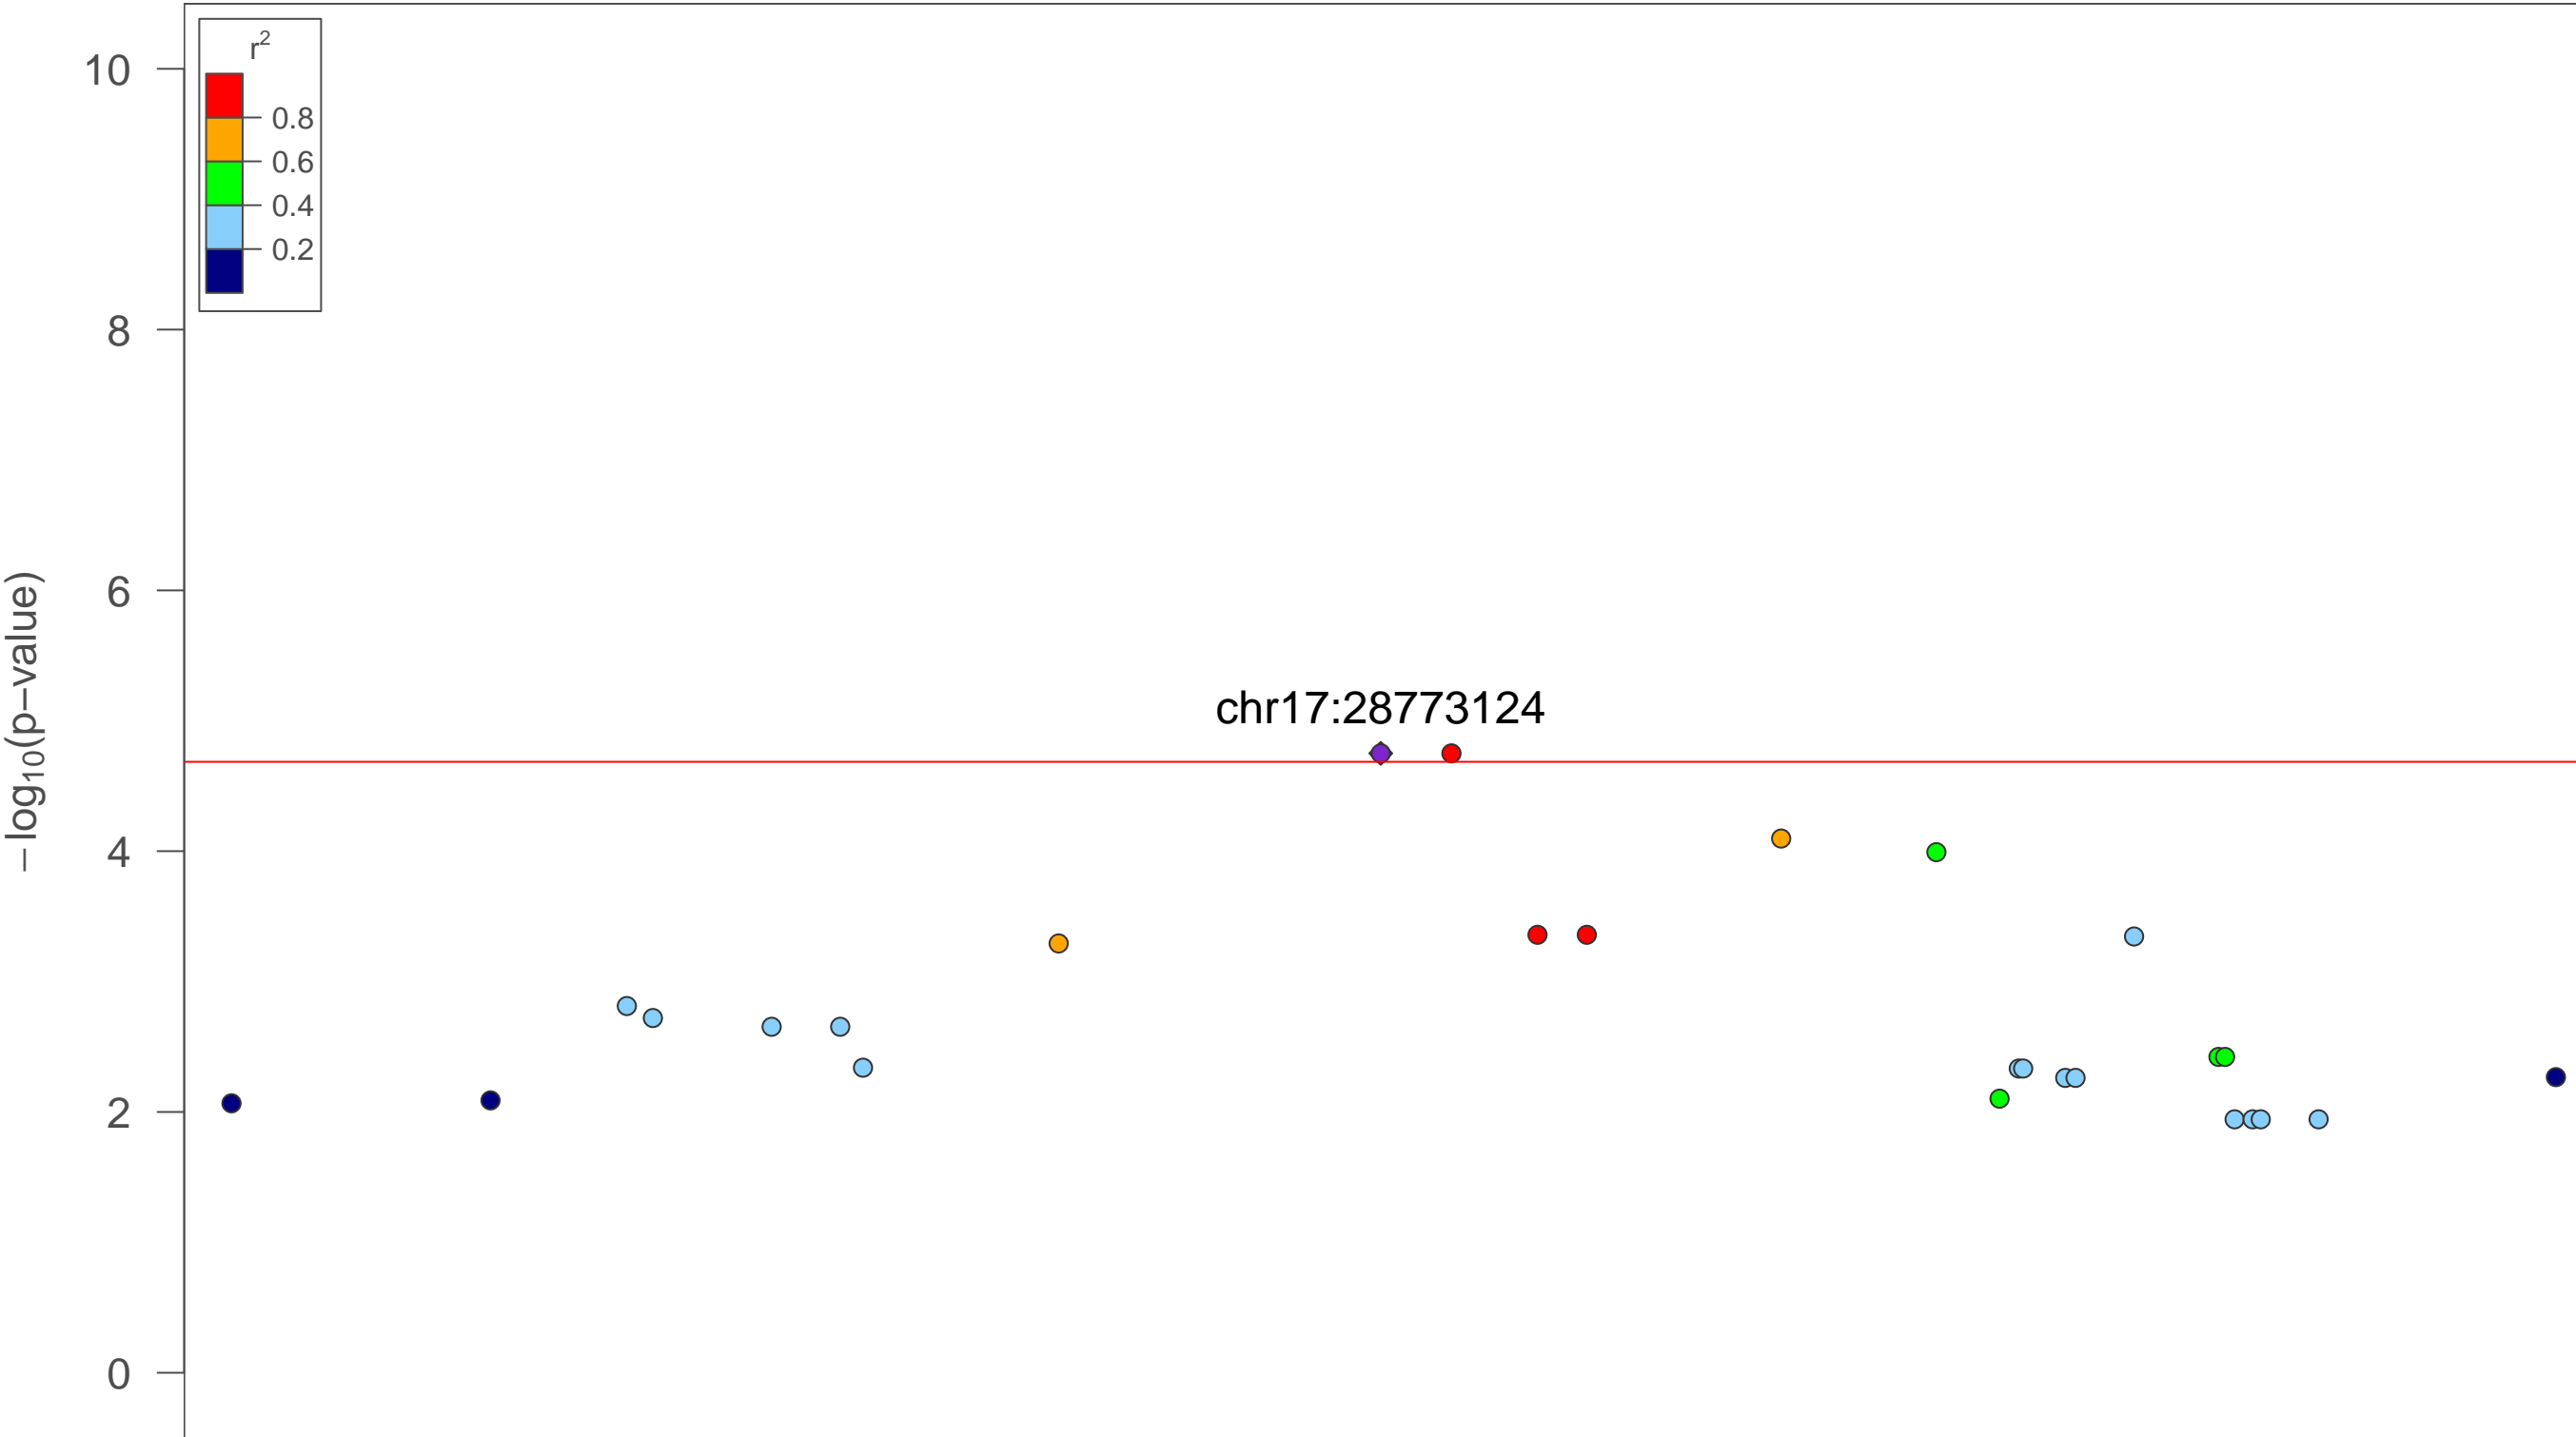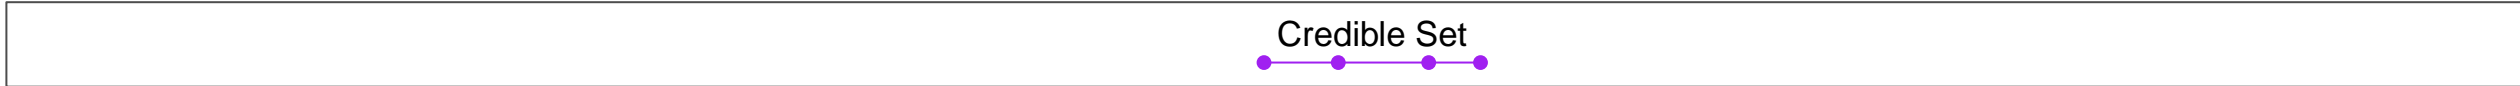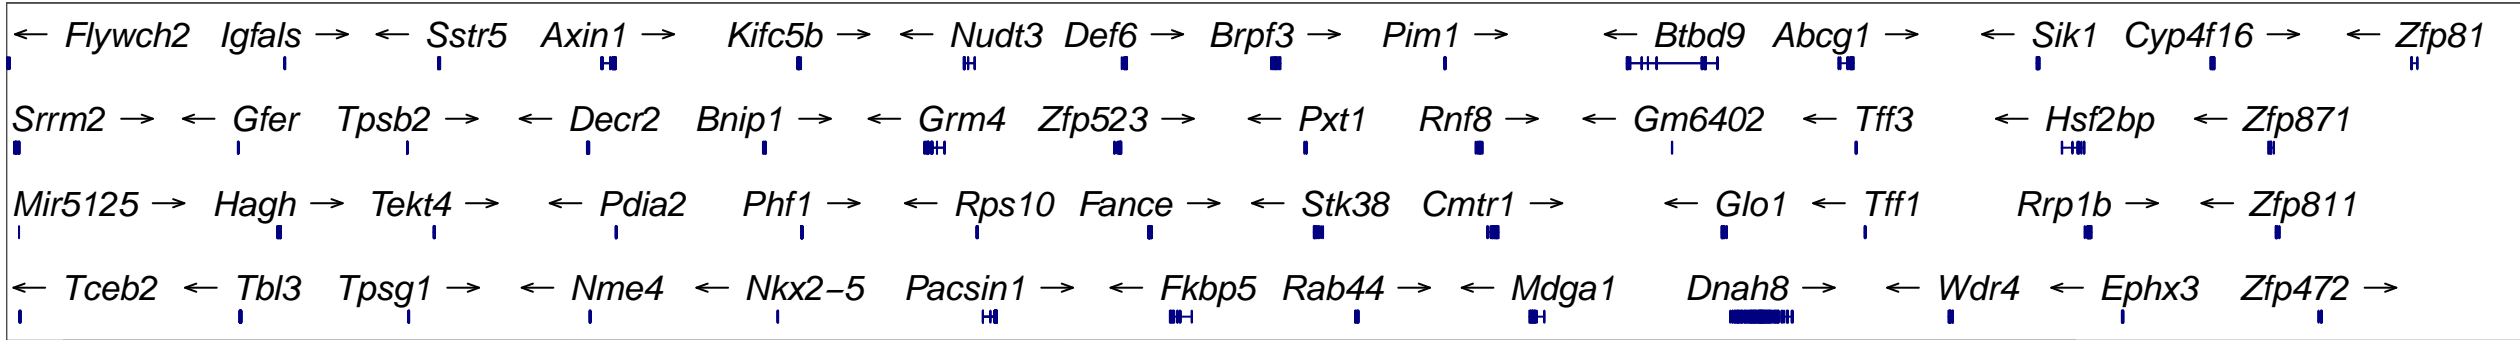

241 genes  
omitted

date: Thu Oct 25 16:49:33 2018

build: F34Array

display range: chr17:23773124–33773124 [23773124–33773124]

hilite range: 0 – 0 [ 0 – 0 ]

reference SNP: chr17:28773124

number of SNPs plotted: 28

min P-value: 1.78E–5 [chr17:28773124]

max P-value: 1.14E–2 [chr17:32340563]

omitted Genes: Prss33, Prss41, Prss32

omitted Genes: Prss21, Dcpp1, Dcpp2

omitted Genes: Dcpp3, Sbp, Sbp1

omitted Genes: Prss30, Prss22, Prss27

omitted Genes: Kctd5, Pdk1, Amdhd2

omitted Genes: Atp6v0c, Tbc1d24, Ntn3

omitted Genes: 1600002H07Rik, Ccnf, Mir5134

omitted Genes: Mir6965, Abca17, Abca3

omitted Genes: D330041H03Rik, Rnps1, Eci1

omitted Genes: Dnase1l2, E4f1, Pgp

omitted Genes: Mlst8, Bricd5, Caskin1

omitted Genes: Traf7, Rab26os, Rab26

omitted Genes: Pkd1, Tsc2, Nthl1

omitted Genes: Slc9a3r2, Npw, Zfp598

omitted Genes: Syng3, Noxo1, Rnf151

omitted Genes: Snhg9, Snora78, Rps2

omitted Genes: Snora64, Ndubf10, Rpl3l

omitted Genes: Msrb1, Hs3st6, Meiob

omitted Genes: Fahd1, Nubp2, Spsb3

omitted Genes: Eme2, Mrps34, Nme3

omitted Genes: Mapk8ip3, Hn1l, Cramp1l

omitted Genes: Ifit140, Tmem204, Telo2

omitted Genes: Ptx4, Clcn7, Ccdc154

omitted Genes: BC003965, Unkl, Gnptg

omitted Genes: Tsr3, Baiap3, Mir3547

omitted Genes: Ube2i, Gm17801, Prss34

omitted Genes: Prss28, Prss29, Tpsab1

omitted Genes: Cacna1h, Sox8, 2810468N07Rik

omitted Genes: Lmf1, Gng13, Chtf18

omitted Genes: Rpusd1, Mslnl, Msln

omitted Genes: Narfl, Haghl, Mir6966

omitted Genes: Ccdc78, Fam173a, Motrn

Make more plots at <http://csg.sph.umich.edu/locuszoom/>



Fine-mapping Regions

| snp            | chr | pos (Mb) | pp         | group        | color  |
|----------------|-----|----------|------------|--------------|--------|
| chr17:28773124 | 17  | 28.77312 | 0.47684602 | Credible Set | purple |
| chr17:29068384 | 17  | 29.06838 | 0.47684602 | Credible Set | purple |
| chr17:29427987 | 17  | 29.42799 | 0.02315398 | Credible Set | purple |
| chr17:29633989 | 17  | 29.63399 | 0.02315398 | Credible Set | purple |

# F34 Array, retic parameters cell hemoglobin concentration mean, repeat

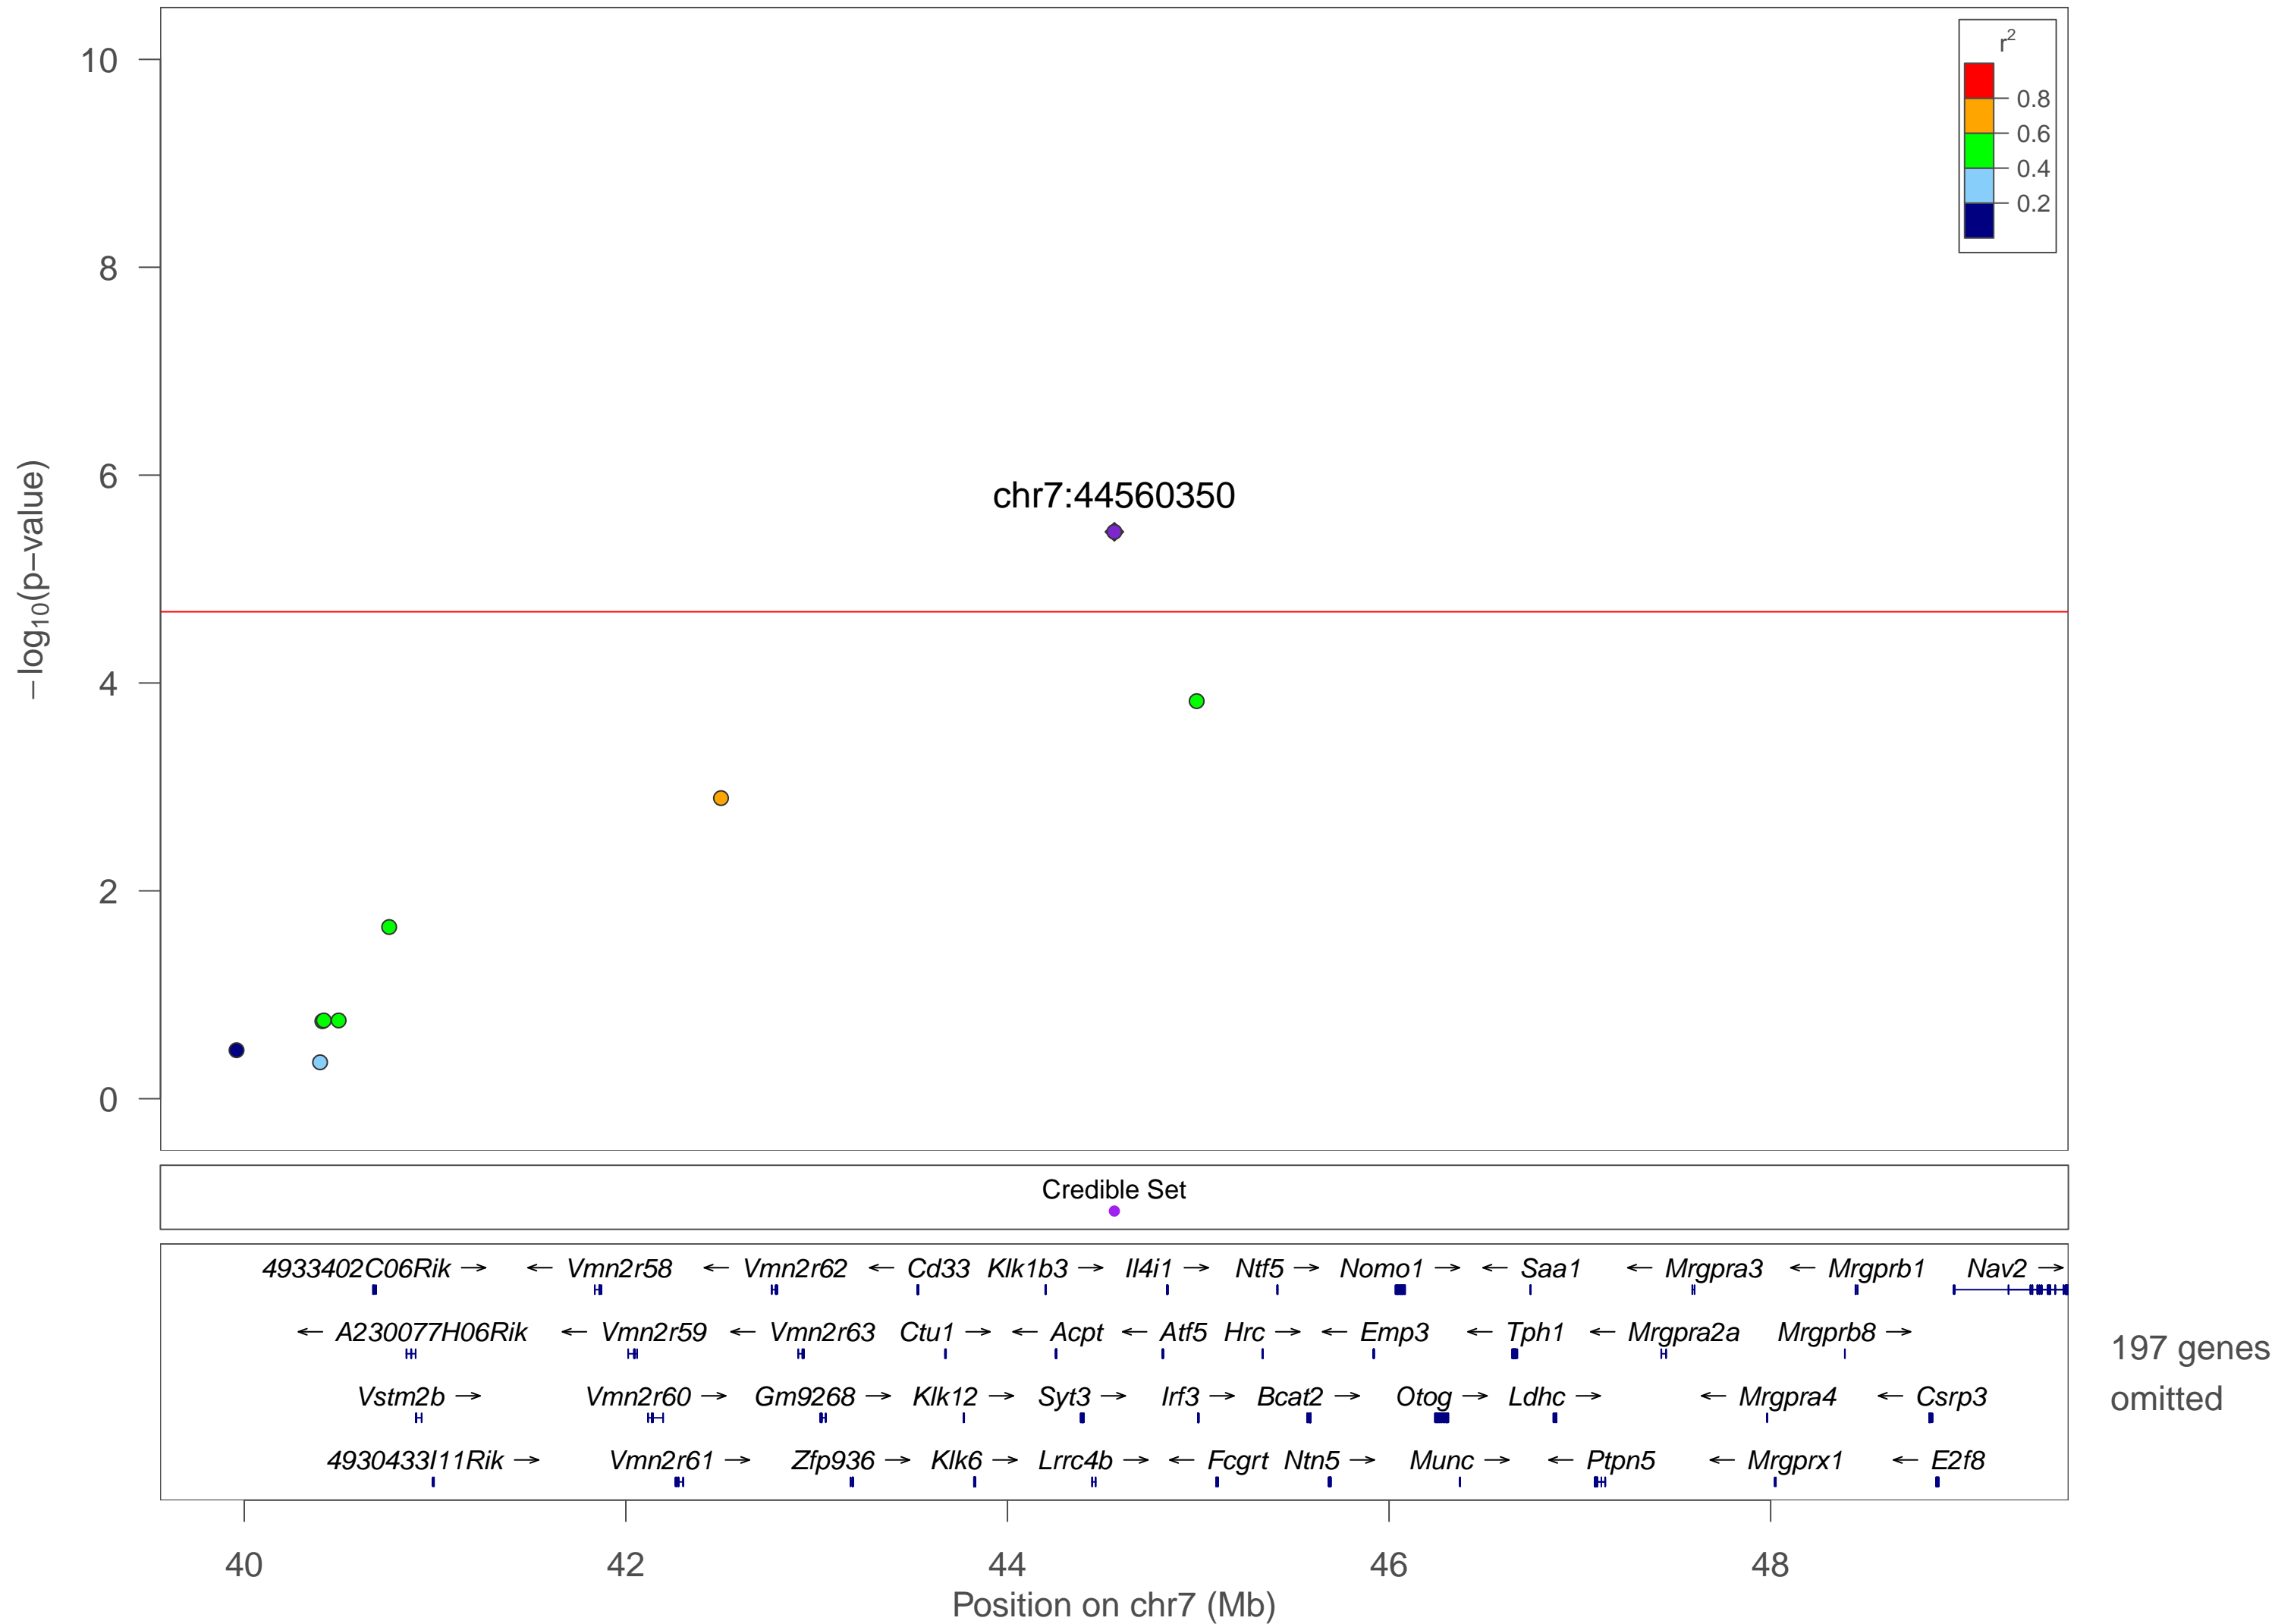

date: Thu Oct 25 16:50:26 2018

build: F34Array

display range: chr7:39560350–49560350 [39560350–49560350]

hilite range: 0 – 0 [ 0 – 0 ]

reference SNP: chr7:44560350

number of SNPs plotted: 10

min P-value: 3.51E–6 [chr7:44560350]

max P-value: 4.46E–1 [chr7:40397482]

omitted Genes: Gm4884, 1700110I07Rik, Gm5592

omitted Genes: AI987944, Vmn2r57, AW146154

omitted Genes: Zfp788, Vmn2r-ps54, Vmn2r-ps60

omitted Genes: 4933421I07Rik, Zfp141, 9830147E19Rik

omitted Genes: Gm5595, Gm2381, EU599041

omitted Genes: Zfp715, Siglecf, Siglecg

omitted Genes: Lim2, Nkg7, Cldnd2

omitted Genes: Etfb, Mir7051, Vsig10l

omitted Genes: Iglon5, 4931406B18Rik, Zfp658

omitted Genes: Zfp719, Zfp819, Ceacam18

omitted Genes: Siglece, Klk14, Klk13

omitted Genes: 2310002F09Rik, Klk11, Klk10

omitted Genes: Klk9, Klk8, Klk7

omitted Genes: Klk5, Klk4, Klk15

omitted Genes: Klk1b7-ps, Klk1b8, Klk1b1

omitted Genes: Klk1b9, Klk1b11, Klk1b26

omitted Genes: Klk1b27, Klk1b21, Klk1b22

omitted Genes: Klk1b16, Klk1b24, Klk1b4

omitted Genes: Klk1b5, Klk1, 1700028J19Rik

omitted Genes: 2410002F23Rik, Snord88c, Snord88a

omitted Genes: Clec11a, Shank1, 1700008O03Rik

omitted Genes: Aspdh, Josd2, Mir7052

omitted Genes: 5430431A17Rik, Emc10, Fam71e1

omitted Genes: Mybpc2, Spib, Pold1

omitted Genes: Mir7053, Nr1h2, Napsa

omitted Genes: Kcnc3, Myh14, Izumo2

omitted Genes: Zfp473, Vrk3, Nup62

omitted Genes: Gm21948, Tbc1d17, Akt1s1

omitted Genes: Mir707, Pnkp, Ptov1

omitted Genes: Med25, Fuz, Ap2a1

omitted Genes: Tsks, Cpt1c, Prrm1

omitted Genes: Gm15545, Bcl2l12, Scf1

Make more plots at <http://csg.sph.umich.edu/locuszoom/>

Fine-mapping Regions

| snp           | chr | pos (Mb) | pp | group        | color  |
|---------------|-----|----------|----|--------------|--------|
| chr7:44560350 | 7   | 44.56035 | 1  | Credible Set | purple |

# F34 Array, retic parameters cell hemoglobin concentration mean, repeat

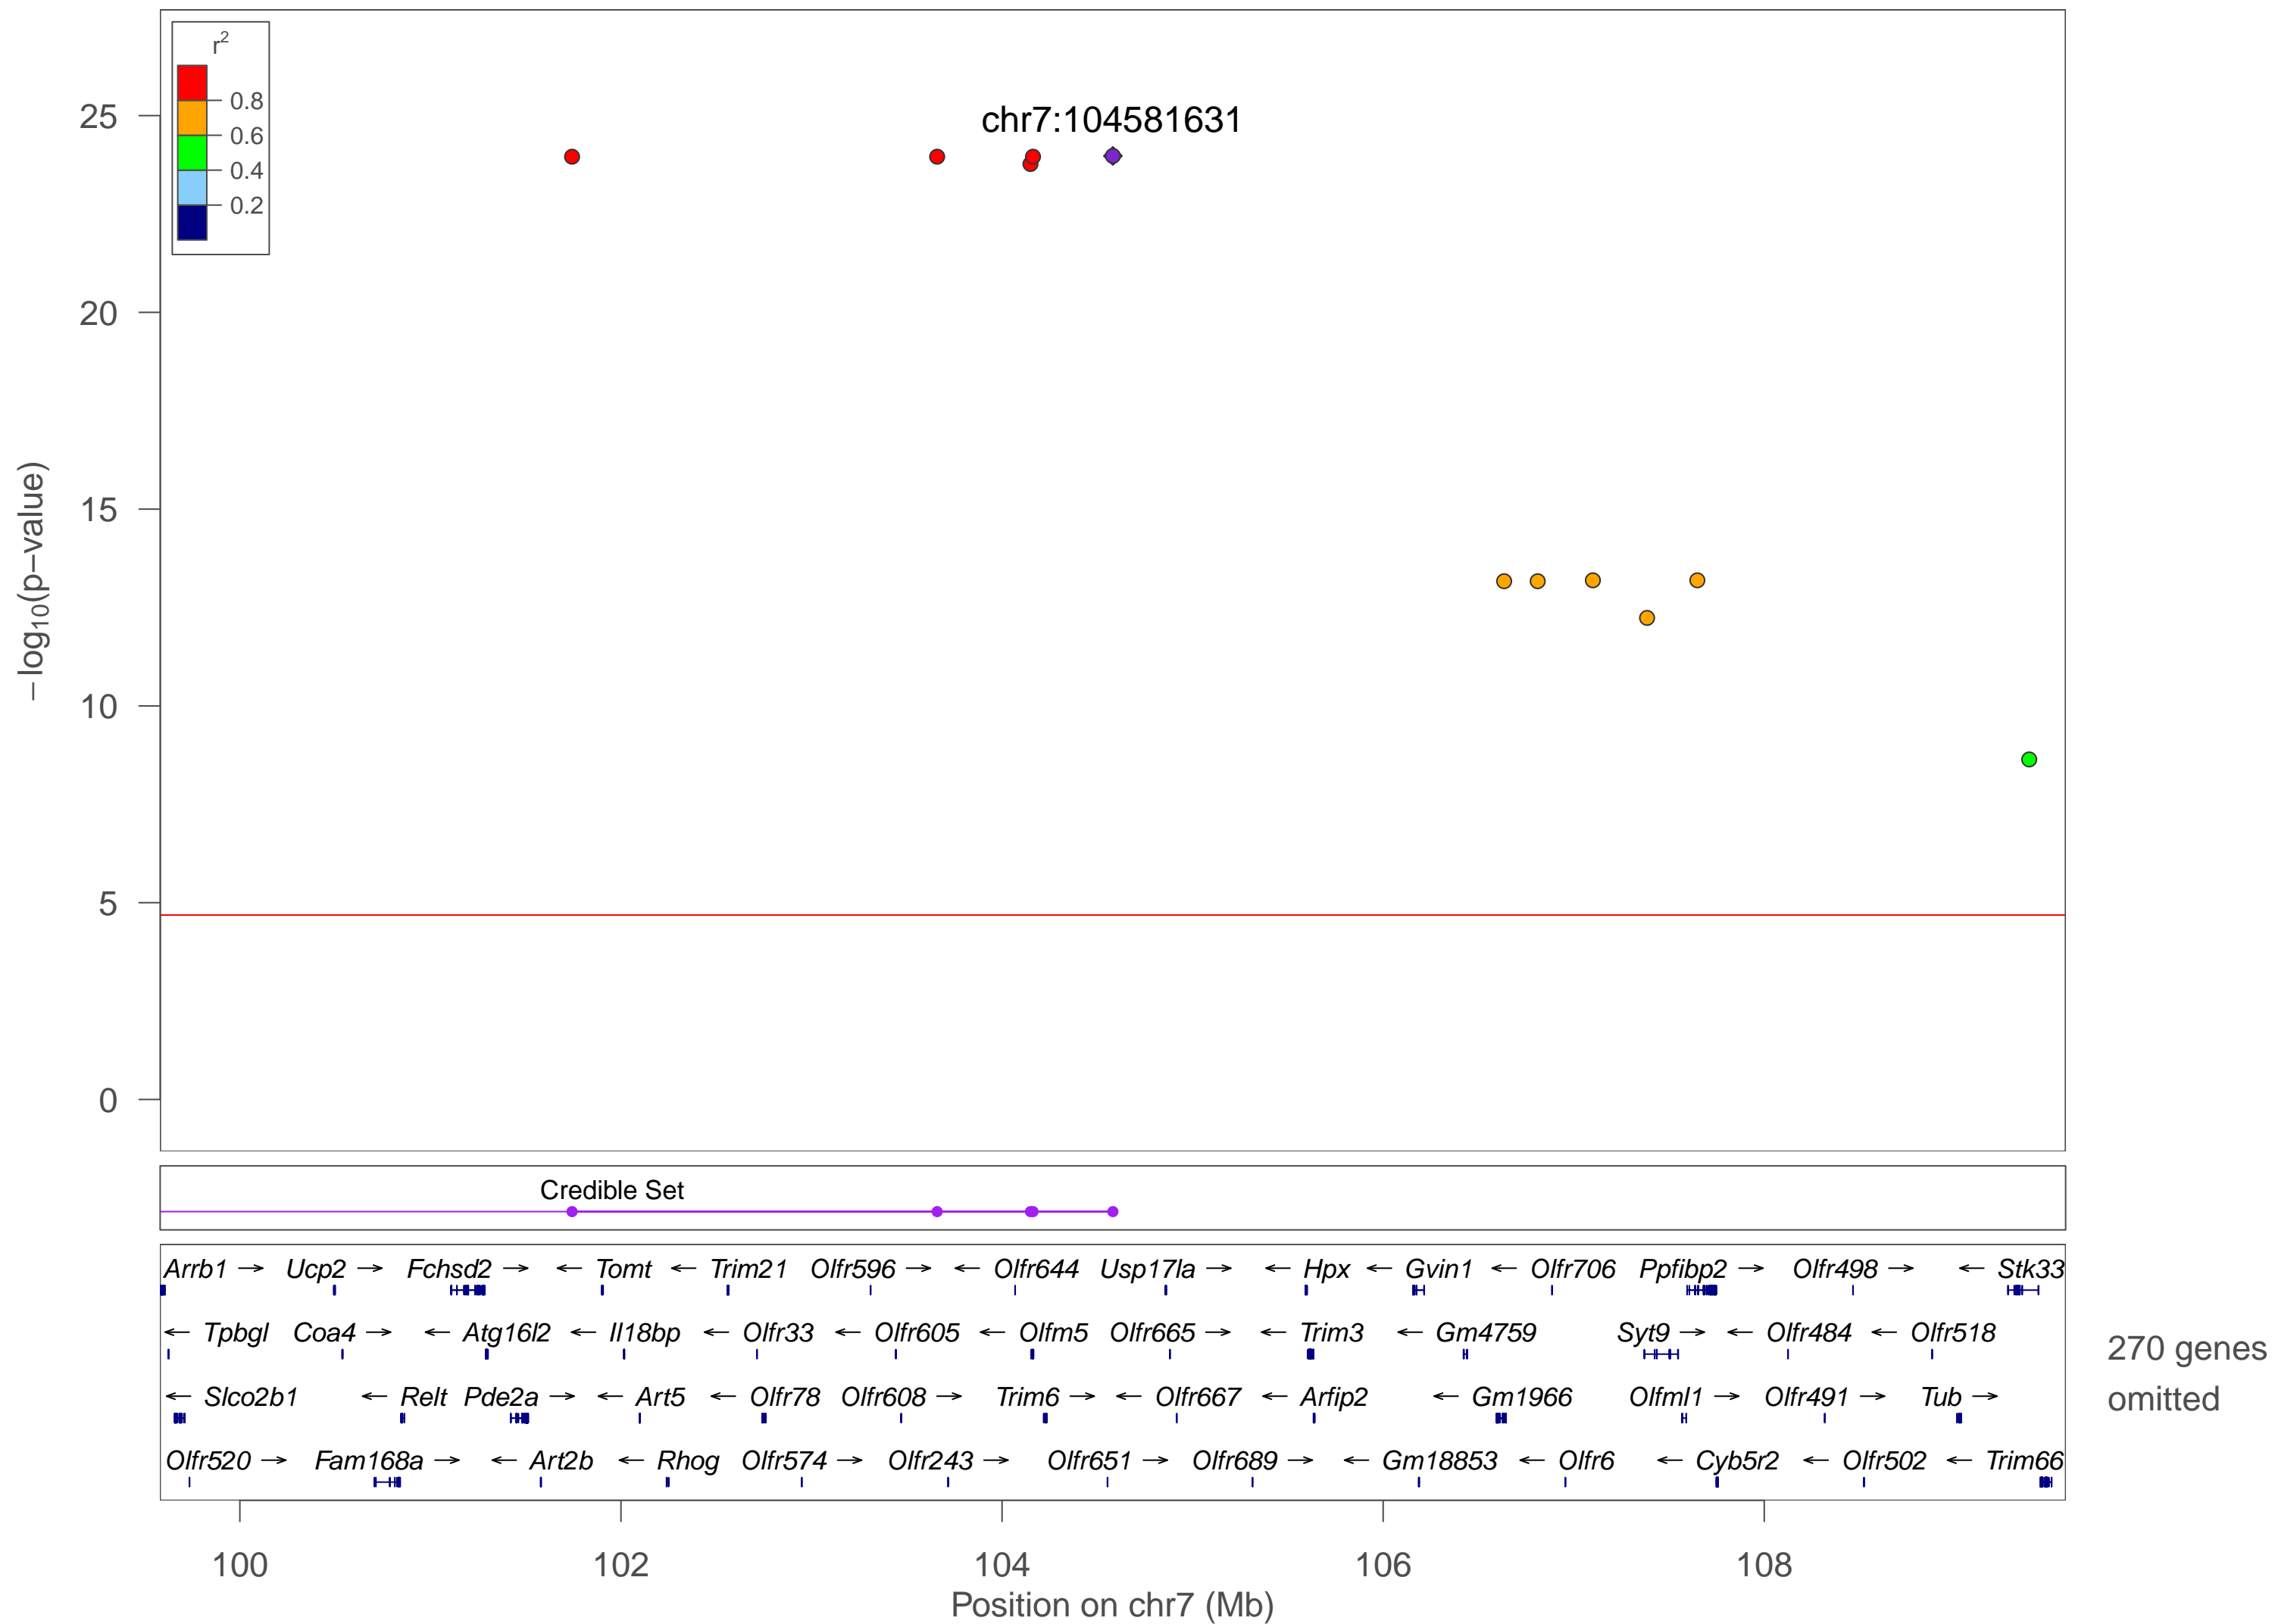

date: Thu Oct 25 16:50:16 2018

build: F34Array

display range: chr7:99581631–109581631 [99581631–109581631]

hilite range: 0 – 0 [ 0 – 0 ]

reference SNP: chr7:104581631

number of SNPs plotted: 12

min P-value: 1.06E–24 [chr7:104581631]

max P-value: 2.29E–9 [chr7:109390566]

omitted Genes: Olfr521, Neu3, Spcs2

omitted Genes: Xrra1, Rnf169, Chrdl2

omitted Genes: Pold3, Lipt2, Kcne3

omitted Genes: Pgm2l1, Gpx2-ps1, P4ha3

omitted Genes: Ppme1, C2cd3, Ucp3

omitted Genes: Dnajb13, Mrpl48, Rab6a

omitted Genes: Plekhhb1, Arhgef17, Mir3102

omitted Genes: P2ry6, P2ry2, Stard10

omitted Genes: Arap1, Mir139, Art2a-ps

omitted Genes: Clpb, Phox2a, Inpp1

omitted Genes: Folr2, Folr1, Anapc15

omitted Genes: Lamtor1, Lrrc51, Numa1

omitted Genes: Rnf121, Xndc1, Xntrpc

omitted Genes: Trpc2, Art1, Chrna10

omitted Genes: Nup98, Pgap2, Stim1

omitted Genes: Rrm1, Olfr543, Olfr544

omitted Genes: Olfr545, Olfr547, Olfr549

omitted Genes: Olfr550, Olfr551, Olfr552

omitted Genes: Olfr553, Olfr554, Olfr555

omitted Genes: Olfr556, Trim68, Olfr557

omitted Genes: Olfr558, Olfr559, Olfr560

omitted Genes: Olfr561, Olfr564, Olfr566

omitted Genes: Olfr568, Olfr569, Olfr570

omitted Genes: Olfr571, Olfr572, Olfr575

omitted Genes: Olfr576, Olfr577, Olfr578

omitted Genes: Olfr582, Olfr583, Olfr584

omitted Genes: Olfr585, Olfr586, Olfr589

omitted Genes: Olfr591, Olfr592, Olfr593

omitted Genes: Olfr594, Usp17ld, Olfr597

omitted Genes: Olfr598, Olfr599, Olfr600

omitted Genes: Olfr601, Olfr603, Usp17lc

omitted Genes: Olfr606, Olfr609, Olfr610

Make more plots at <http://csg.sph.umich.edu/locuszoom/>

Fine-mapping Regions

| snp            | chr | pos (Mb)  | pp        | group        | color  |
|----------------|-----|-----------|-----------|--------------|--------|
| chr7:99328376  | 7   | 99.32838  | 0.1261267 | Credible Set | purple |
| chr7:101743401 | 7   | 101.74340 | 0.1859423 | Credible Set | purple |
| chr7:103659355 | 7   | 103.65936 | 0.1859423 | Credible Set | purple |
| chr7:104149022 | 7   | 104.14902 | 0.1218390 | Credible Set | purple |
| chr7:104162444 | 7   | 104.16244 | 0.1859423 | Credible Set | purple |
| chr7:104581631 | 7   | 104.58163 | 0.1942073 | Credible Set | purple |

# F34 Array, retic parameters cell hemoglobin concentration mean, repeat

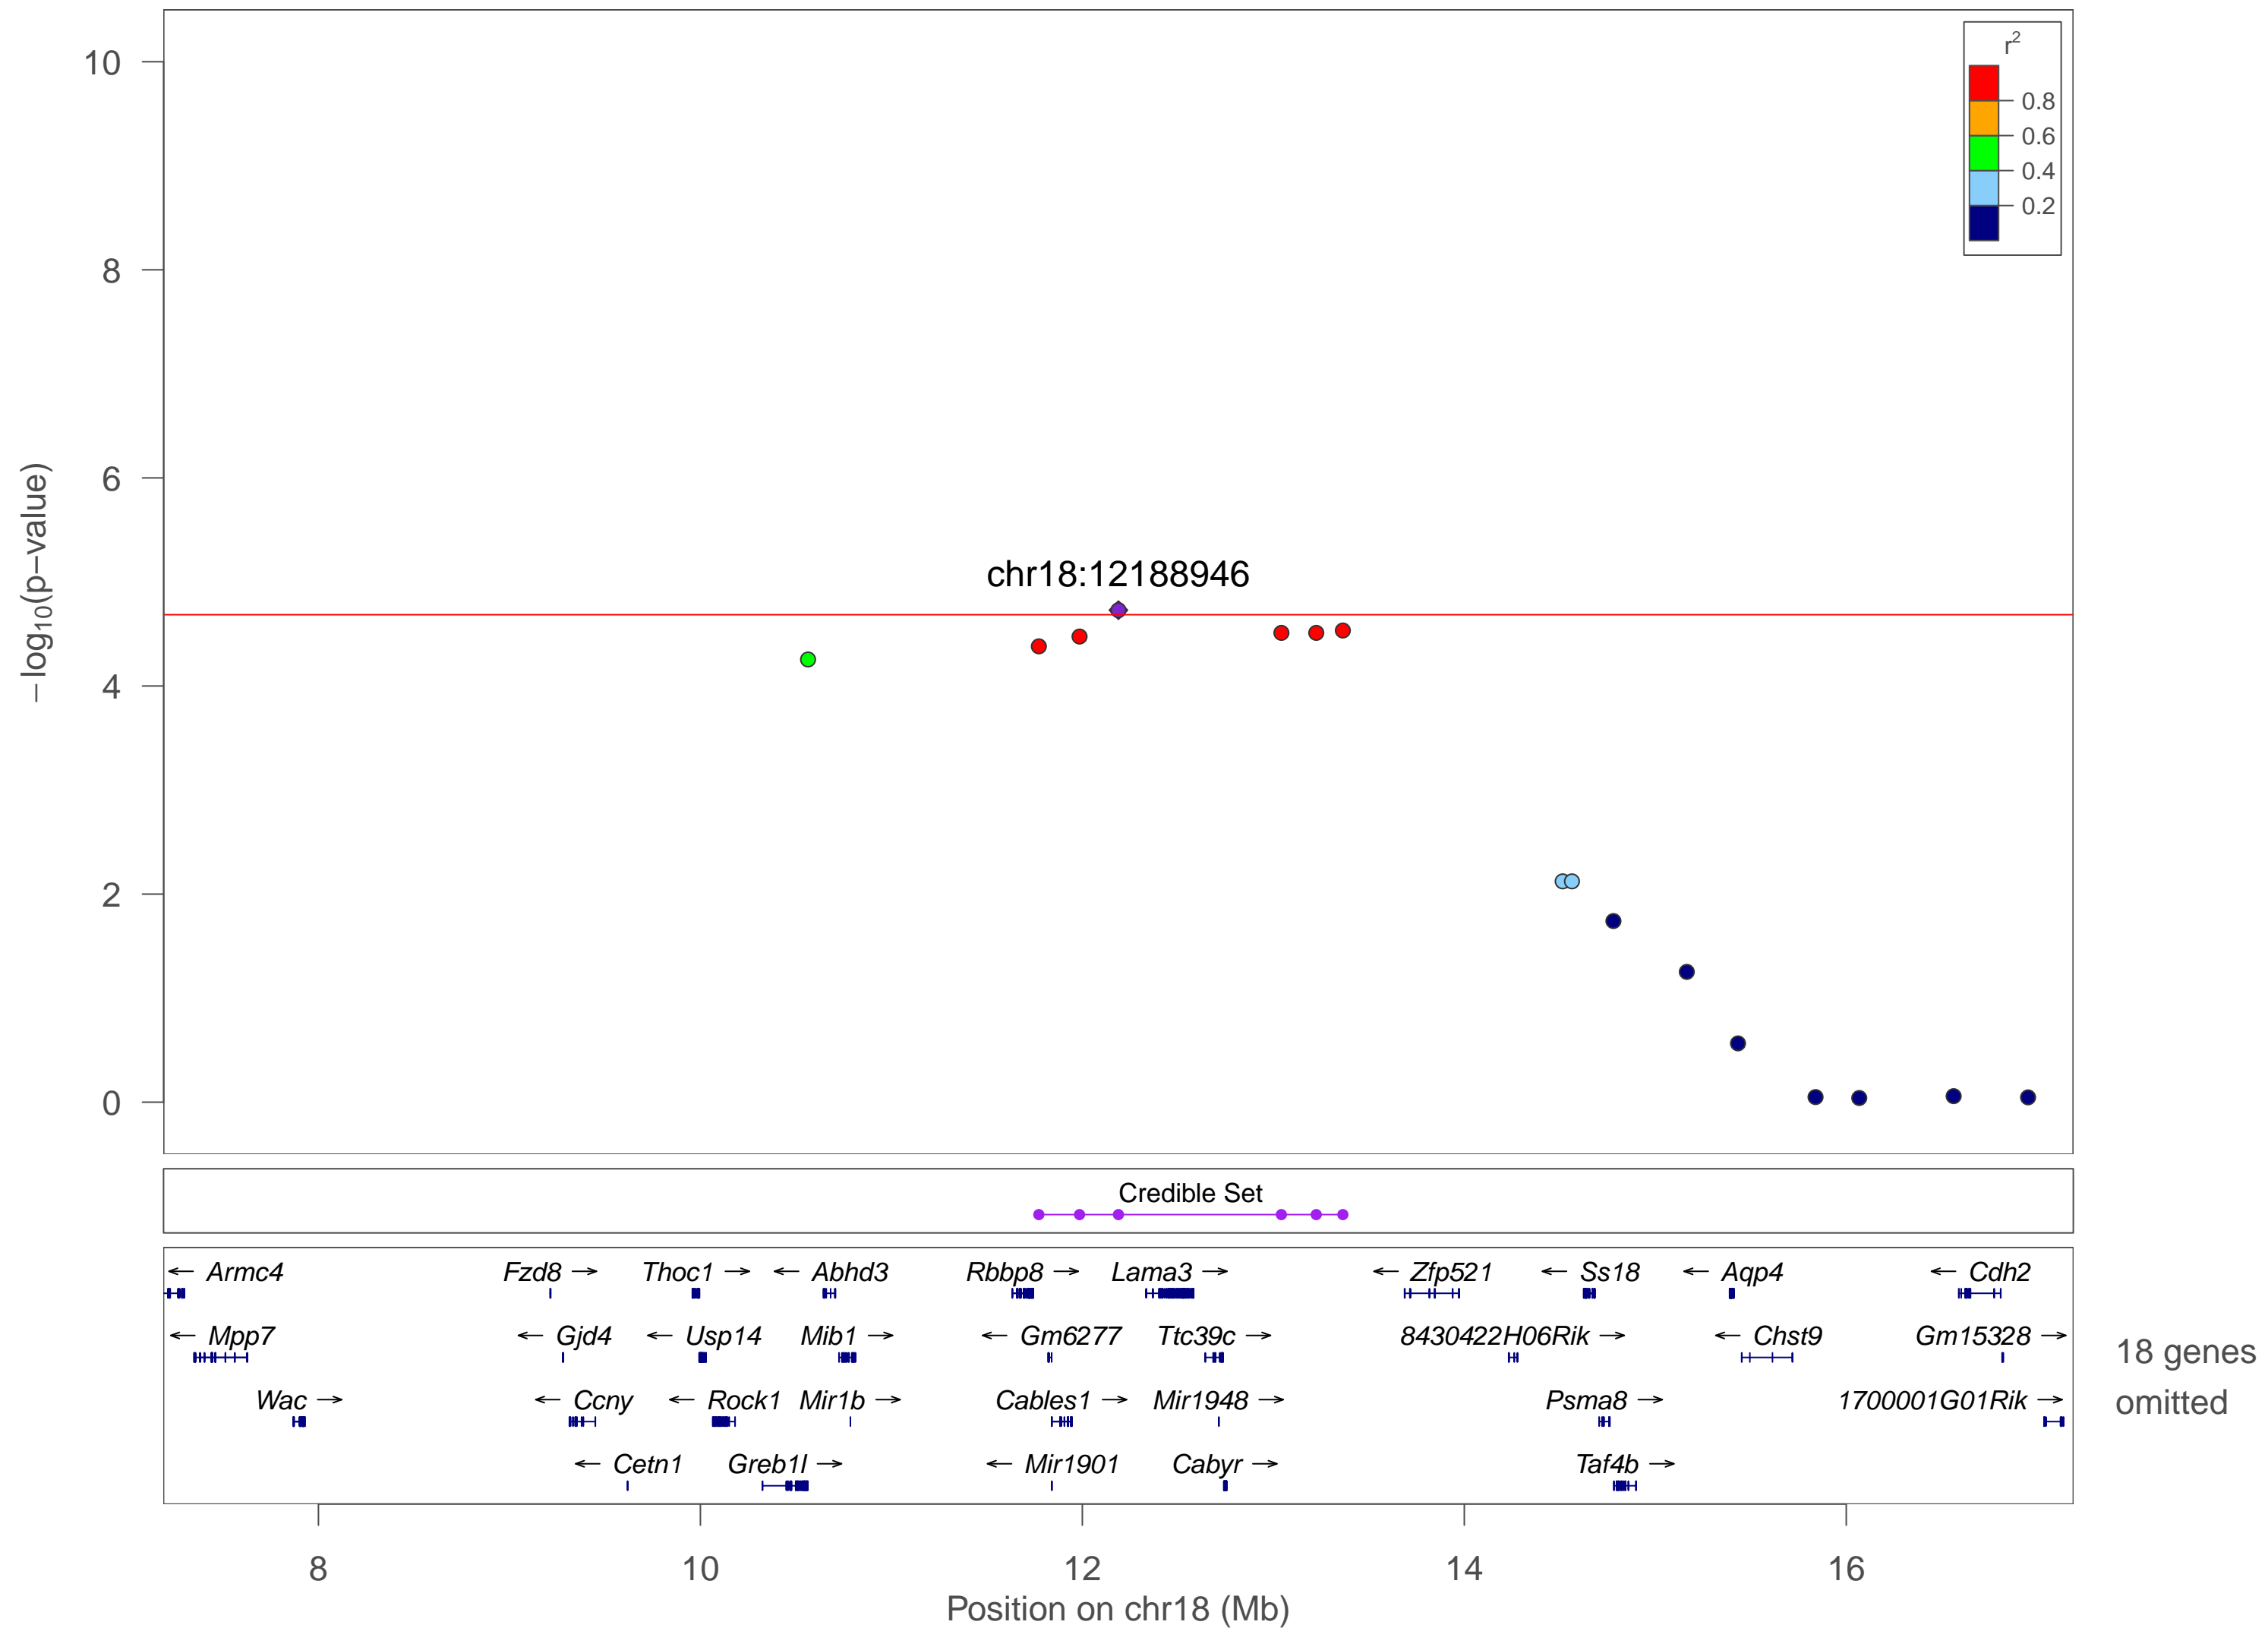



date: Thu Oct 25 16:50:04 2018

build: F34Array

display range: chr18:7188946–17188946 [7188946–17188946]

hilite range: 0 – 0 [ 0 – 0 ]

reference SNP: chr18:12188946

number of SNPs plotted: 17

min P-value: 1.87E–5 [chr18:12188946]

max P-value: 9.11E–1 [chr18:16068097]

omitted Genes: Colec12, Esco1, Snrpd1

omitted Genes: 4930563E18Rik, Mir133a–1, Mir1a–2

omitted Genes: 1010001N08Rik, Gata6, Tmem241

omitted Genes: Riok3, 3110002H16Rik, Npc1

omitted Genes: Ankrd29, Osbp1a, Impact

omitted Genes: Hrh4, Kctd1, 4933424G05Rik

Fine-mapping Regions

| snp            | chr | pos (Mb) | pp        | group        | color  |
|----------------|-----|----------|-----------|--------------|--------|
| chr18:11772246 | 18  | 11.77225 | 0.1187936 | Credible Set | purple |
| chr18:11985350 | 18  | 11.98535 | 0.1459508 | Credible Set | purple |
| chr18:12188946 | 18  | 12.18895 | 0.2541053 | Credible Set | purple |
| chr18:13042279 | 18  | 13.04228 | 0.1577027 | Credible Set | purple |
| chr18:13224851 | 18  | 13.22485 | 0.1577027 | Credible Set | purple |
| chr18:13364094 | 18  | 13.36409 | 0.1657449 | Credible Set | purple |

F34 Array, retic parameters concentration of hemoglobin in reticulocytes, repeat

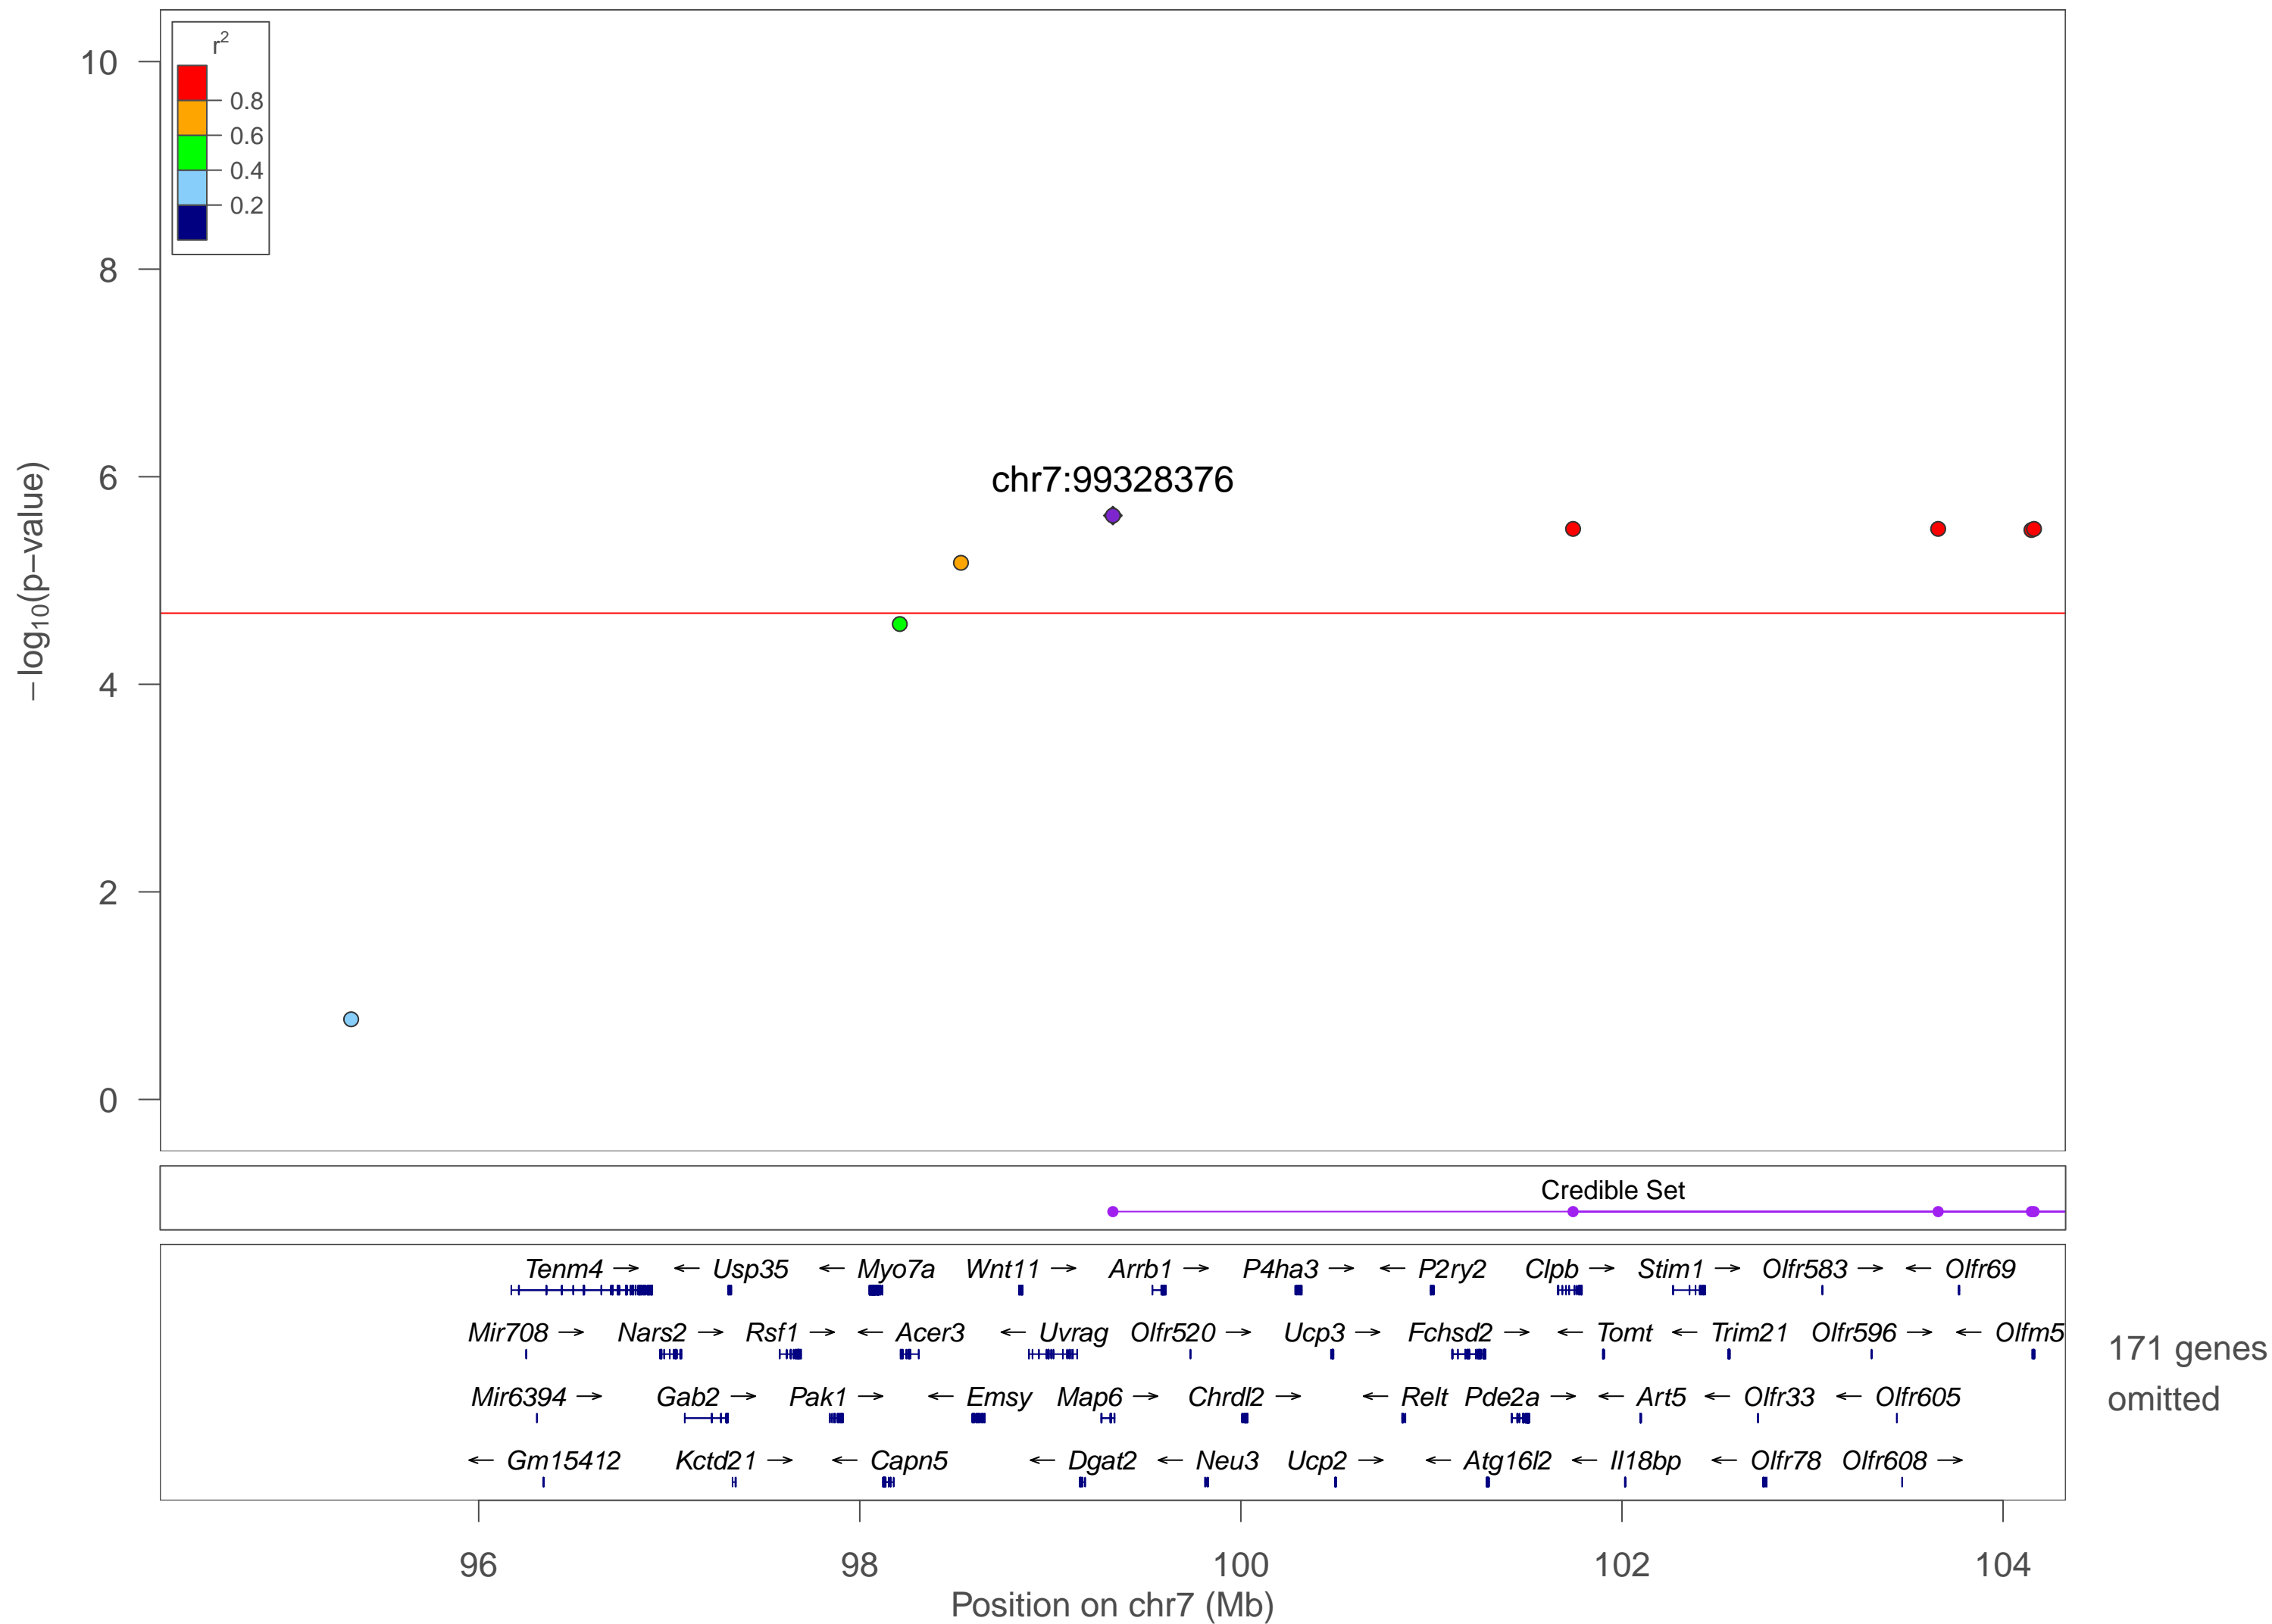

date: Thu Oct 25 16:50:45 2018

build: F34Array

display range: chr7:94328376–104328376 [94328376–104328376]

hilite range: 0 – 0 [ 0 – 0 ]

reference SNP: chr7:99328376

number of SNPs plotted: 9

min P-value: 2.37E–6 [chr7:99328376]

max P-value: 1.69E–1 [chr7:95330810]

omitted Genes: Gm15413, Alg8, Ndufc2

omitted Genes: Thrsp, Kctd14, Ints4

omitted Genes: Aamdc, Rsf1os1, Clns1a

omitted Genes: Aqp11, Gdpd4, Omp

omitted Genes: Gm16938, B3gnt6, Tsku

omitted Genes: Gucy2d, Lrrc32, Prkrir

omitted Genes: Mogat2, Gm26705, Serpinh1

omitted Genes: Gdpd5, Khlh35, Rps3

omitted Genes: Snord15b, Snord15a, Mir326

omitted Genes: Tpbgl, Slco2b1, Olfr521

omitted Genes: Spcs2, Xrra1, Rnf169

omitted Genes: Pold3, Lipt2, Kcne3

omitted Genes: Pgm2l1, Gpx2-ps1, Ppme1

omitted Genes: C2cd3, Dnajb13, Coa4

omitted Genes: Mrpl48, Rab6a, Plekhh1

omitted Genes: Fam168a, Arhgef17, Mir3102

omitted Genes: P2ry6, Stard10, Arap1

omitted Genes: Mir139, Art2a-ps, Art2b

omitted Genes: Phox2a, Inpp1, Folr2

omitted Genes: Folr1, Anapc15, Lamtor1

omitted Genes: Lrrc51, Numa1, Rnf121

omitted Genes: Xndc1, Xntrpc, Trpc2

omitted Genes: Art1, Chrna10, Nup98

omitted Genes: Pgap2, Rhog, Rrm1

omitted Genes: Olfr543, Olfr544, Olfr545

omitted Genes: Olfr547, Olfr549, Olfr550

omitted Genes: Olfr551, Olfr552, Olfr553

omitted Genes: Olfr554, Olfr555, Olfr556

omitted Genes: Trim68, Olfr557, Olfr558

omitted Genes: Olfr559, Olfr560, Olfr561

omitted Genes: Olfr564, Olfr566, Olfr568

omitted Genes: Olfr569, Olfr570, Olfr571

Make more plots at <http://csg.sph.umich.edu/locuszoom/>

Fine-mapping Regions

| snp            | chr | pos (Mb)  | pp        | group        | color  |
|----------------|-----|-----------|-----------|--------------|--------|
| chr7:99328376  | 7   | 99.32838  | 0.2105870 | Credible Set | purple |
| chr7:101743401 | 7   | 101.74340 | 0.1585895 | Credible Set | purple |
| chr7:103659355 | 7   | 103.65936 | 0.1585895 | Credible Set | purple |
| chr7:104149022 | 7   | 104.14902 | 0.1547852 | Credible Set | purple |
| chr7:104162444 | 7   | 104.16244 | 0.1585895 | Credible Set | purple |
| chr7:104581631 | 7   | 104.58163 | 0.1588594 | Credible Set | purple |

F34 Array, retic parameters concentration of hemoglobin in reticulocytes, repeat

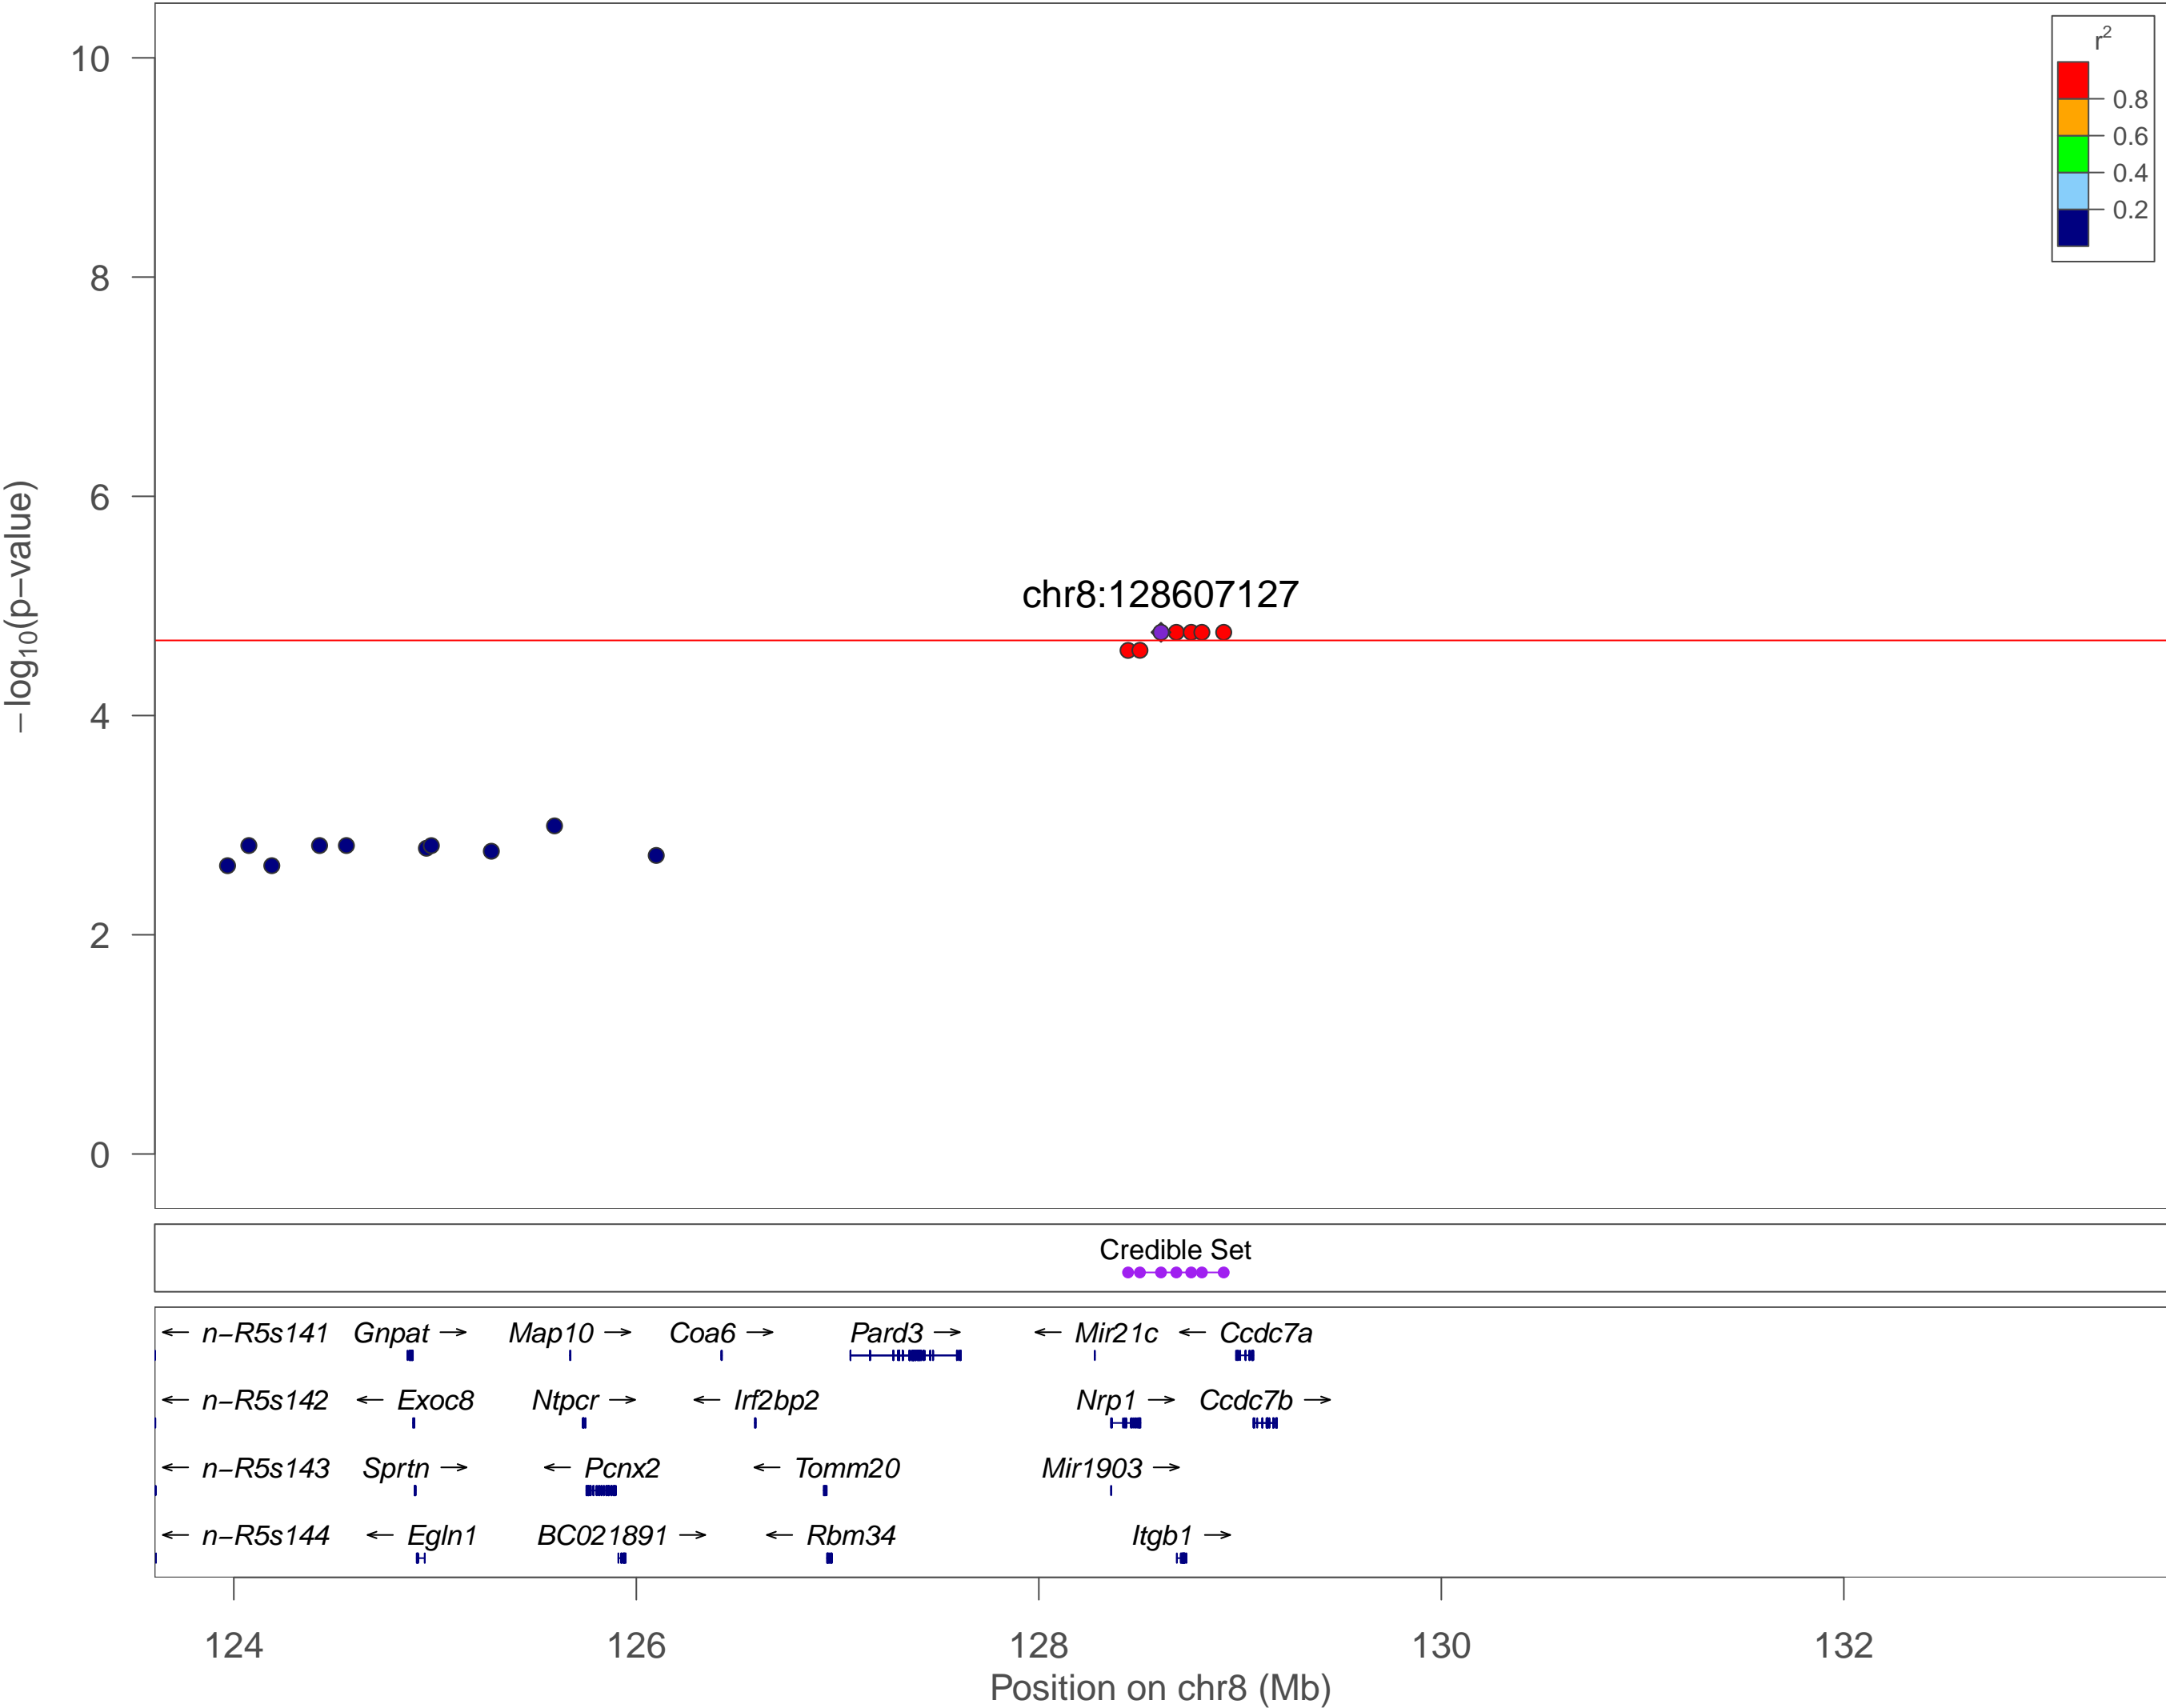

date: Thu Oct 25 16:50:52 2018  
build: F34Array  
display range: chr8:123607127–133607127 [123607127–133607127]  
hilite range: 0 – 0 [ 0 – 0 ]  
reference SNP: chr8:128607127  
number of SNPs plotted: 18  
min P-value: 1.74E–5 [chr8:128607127]  
max P-value: 2.34E–3 [chr8:123968866]  
omitted Genes: Gm25212, n-R5s146, Gm22291  
omitted Genes: Gm23284, n-R5s149, Rhou  
omitted Genes: 6030466F02Rik, Rab4a, Ccsap  
omitted Genes: Acta1, Nup133, Abcb10  
omitted Genes: Taf5l, Mir1967, Urb2  
omitted Genes: Galnt2, Pgbd5, Cog2  
omitted Genes: Agt, Capn9, 2310022B05Rik  
omitted Genes: Ttc13, Arv1, Fam89a  
omitted Genes: Trim67, 2810004N23Rik, Tsnax  
omitted Genes: Disc1, Sipa1l2, 4930567H12Rik  
omitted Genes: Kcnk1, Slc35f3, Gm17296  
omitted Genes: 2610044O15Rik8

Fine-mapping Regions

| snp            | chr | pos (Mb) | pp        | group        | color  |
|----------------|-----|----------|-----------|--------------|--------|
| chr8:128443469 | 8   | 128.4435 | 0.1089254 | Credible Set | purple |
| chr8:128502425 | 8   | 128.5024 | 0.1091172 | Credible Set | purple |
| chr8:128607127 | 8   | 128.6071 | 0.1563915 | Credible Set | purple |
| chr8:128683251 | 8   | 128.6833 | 0.1563915 | Credible Set | purple |
| chr8:128757217 | 8   | 128.7572 | 0.1563915 | Credible Set | purple |
| chr8:128810304 | 8   | 128.8103 | 0.1563915 | Credible Set | purple |
| chr8:128918665 | 8   | 128.9187 | 0.1563915 | Credible Set | purple |



F34 Array, retic parameters cell hemoglobin distribution width, repeat

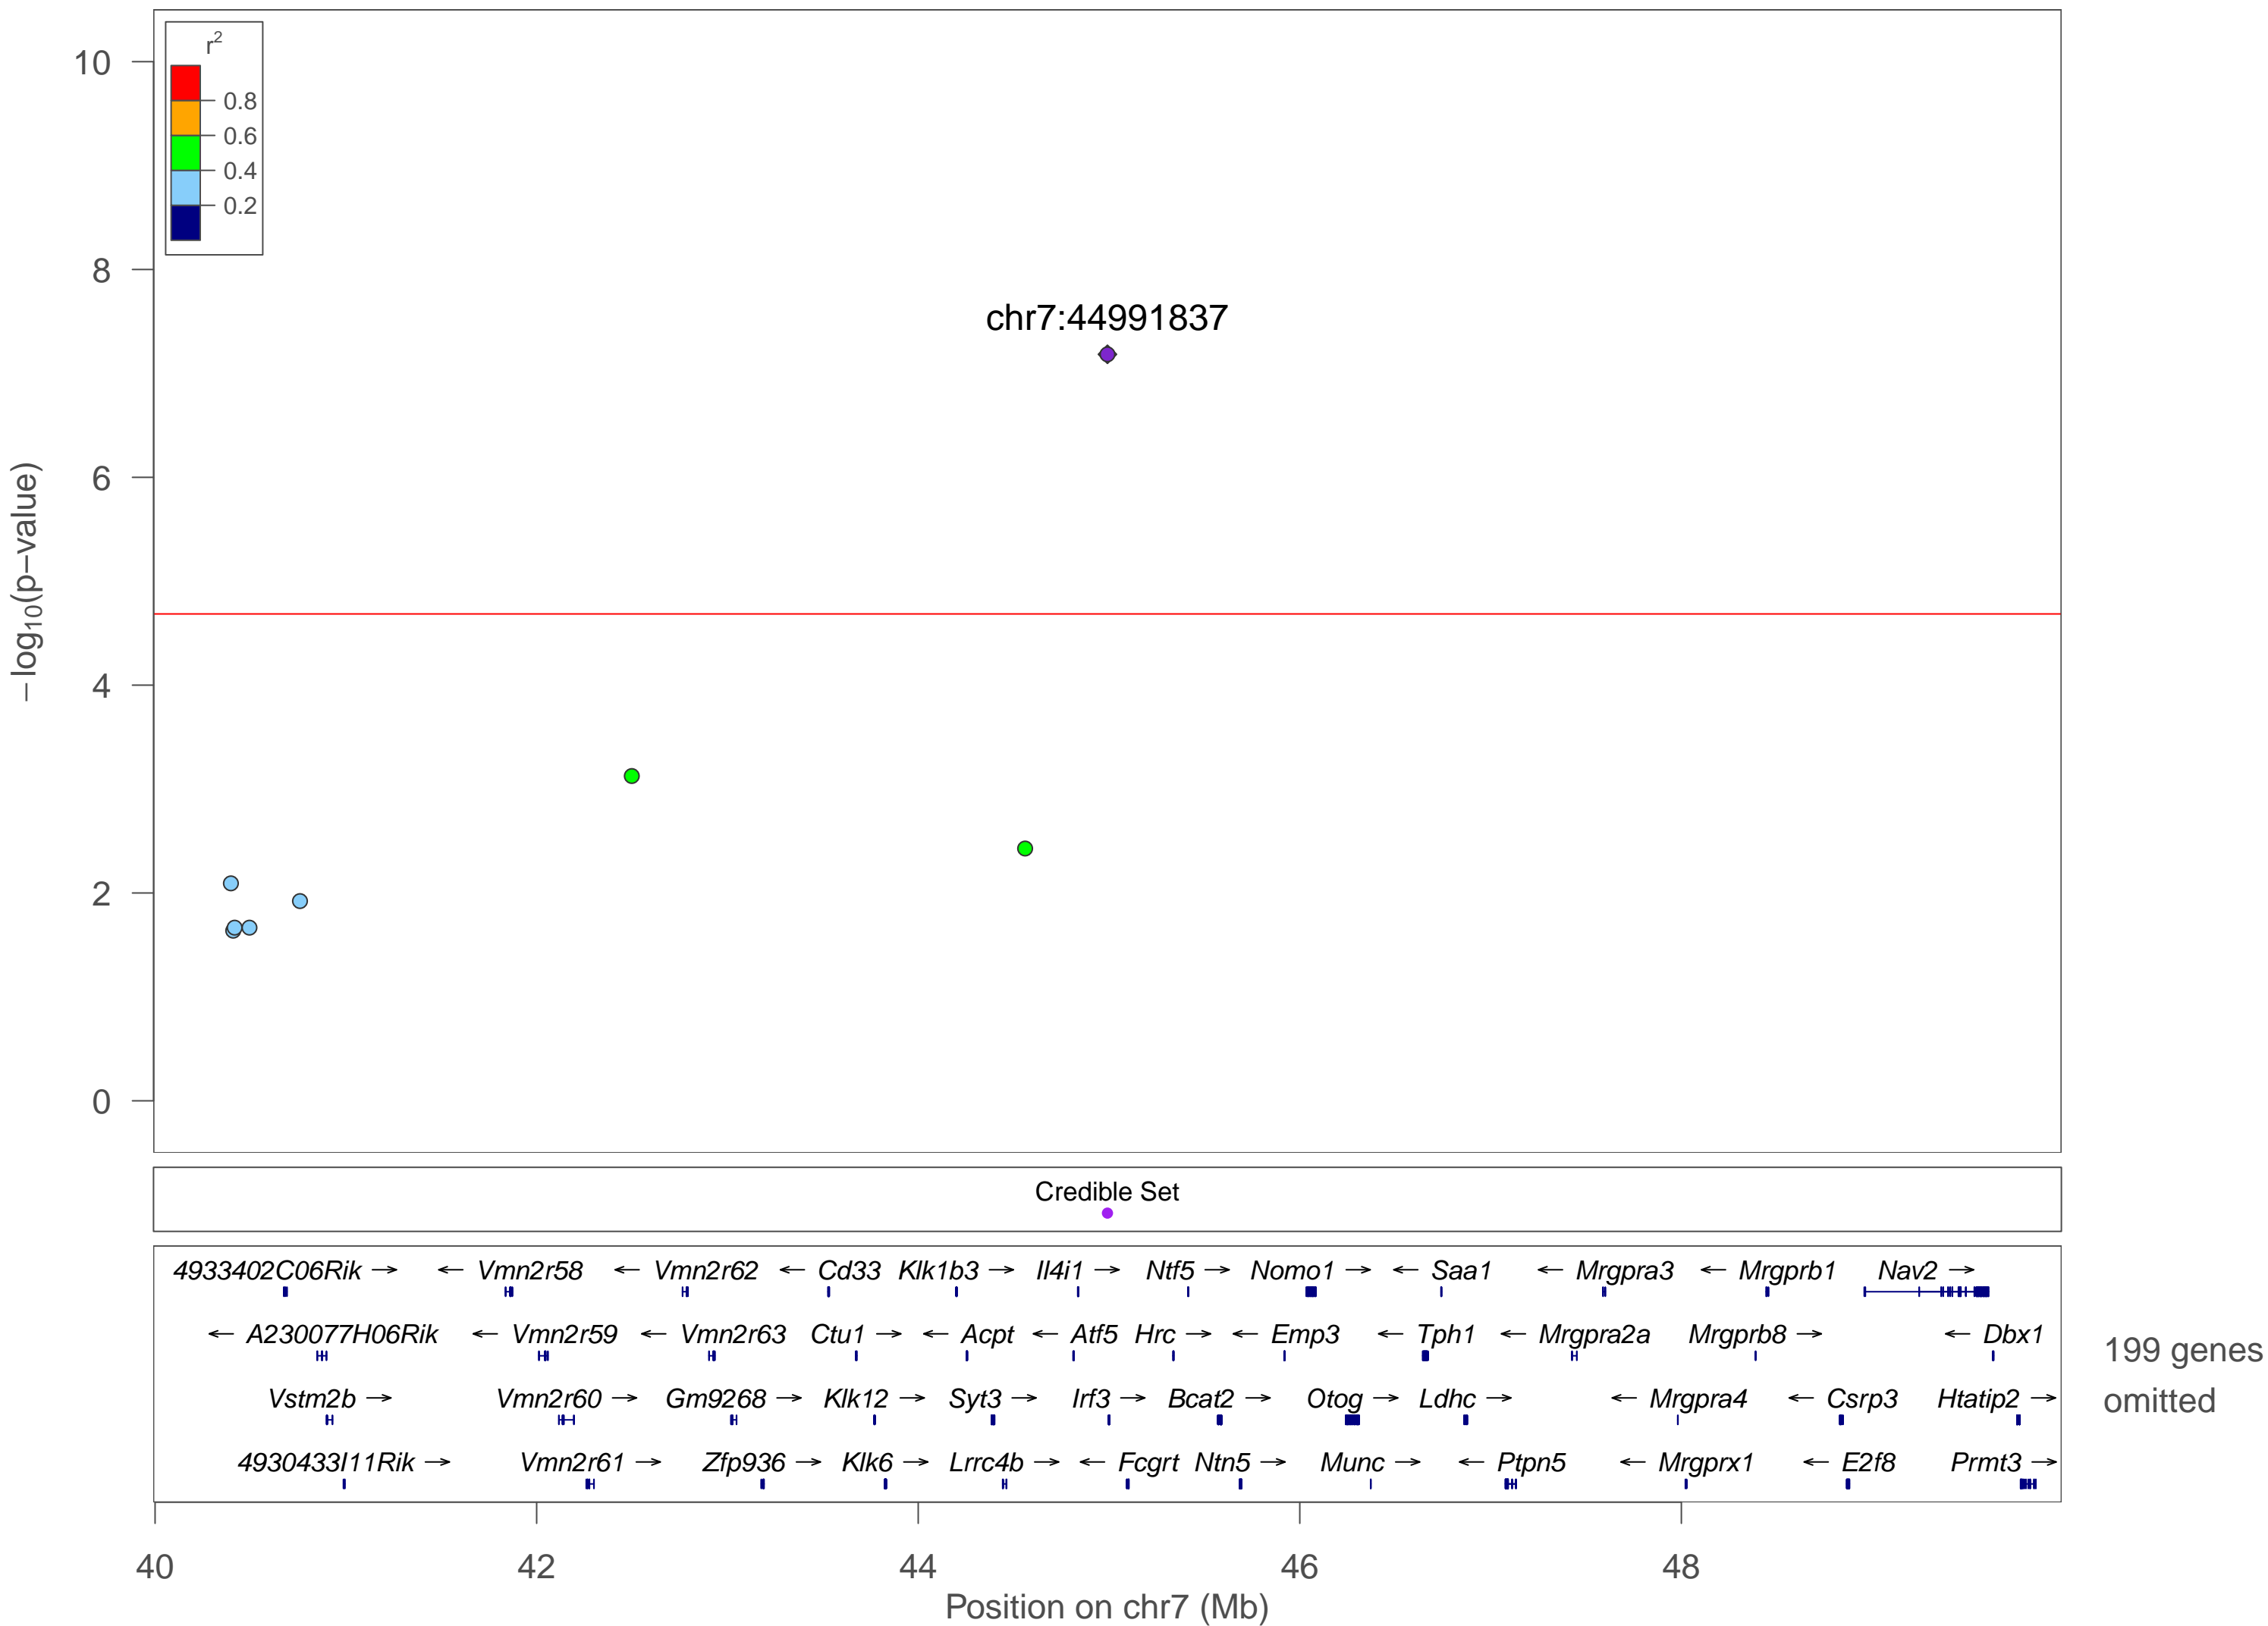

date: Thu Oct 25 16:51:02 2018

build: F34Array

display range: chr7:39991837–49991837 [39991837–49991837]

hilite range: 0 – 0 [ 0 – 0 ]

reference SNP: chr7:44991837

number of SNPs plotted: 9

min P-value: 6.55E–8 [chr7:44991837]

max P-value: 2.31E–2 [chr7:40409511]

omitted Genes: Gm4884, 1700110I07Rik, Gm5592

omitted Genes: AI987944, Vmn2r57, AW146154

omitted Genes: Zfp788, Vmn2r-ps54, Vmn2r-ps60

omitted Genes: 4933421I07Rik, Zfp141, 9830147E19Rik

omitted Genes: Gm5595, Gm2381, EU599041

omitted Genes: Zfp715, Siglecf, Siglecg

omitted Genes: Lim2, Nkg7, Cldnd2

omitted Genes: Etfb, Mir7051, Vsig10l

omitted Genes: Iglon5, 4931406B18Rik, Zfp658

omitted Genes: Zfp719, Zfp819, Ceacam18

omitted Genes: Siglece, Klk14, Klk13

omitted Genes: 2310002F09Rik, Klk11, Klk10

omitted Genes: Klk9, Klk8, Klk7

omitted Genes: Klk5, Klk4, Klk15

omitted Genes: Klk1b7-ps, Klk1b8, Klk1b1

omitted Genes: Klk1b9, Klk1b11, Klk1b26

omitted Genes: Klk1b27, Klk1b21, Klk1b22

omitted Genes: Klk1b16, Klk1b24, Klk1b4

omitted Genes: Klk1b5, Klk1, 1700028J19Rik

omitted Genes: 2410002F23Rik, Snord88c, Snord88a

omitted Genes: Clec11a, Shank1, 1700008O03Rik

omitted Genes: Aspdh, Josd2, Mir7052

omitted Genes: 5430431A17Rik, Emc10, Fam71e1

omitted Genes: Mybpc2, Spib, Pold1

omitted Genes: Mir7053, Nr1h2, Napsa

omitted Genes: Kcnc3, Myh14, Izumo2

omitted Genes: Zfp473, Vrk3, Nup62

omitted Genes: Gm21948, Tbc1d17, Akt1s1

omitted Genes: Mir707, Pnkp, Pto1

omitted Genes: Med25, Fuz, Ap2a1

omitted Genes: Tsks, Cpt1c, Pmt1

omitted Genes: Gm15545, Bcl2l12, Scf1

Make more plots at <http://csg.sph.umich.edu/locuszoom/>

Fine-mapping Regions

| snp           | chr | pos (Mb) | pp | group        | color  |
|---------------|-----|----------|----|--------------|--------|
| chr7:44991837 | 7   | 44.99184 | 1  | Credible Set | purple |

# F34 Array, retic parameters cell hemoglobin distribution width, repeat

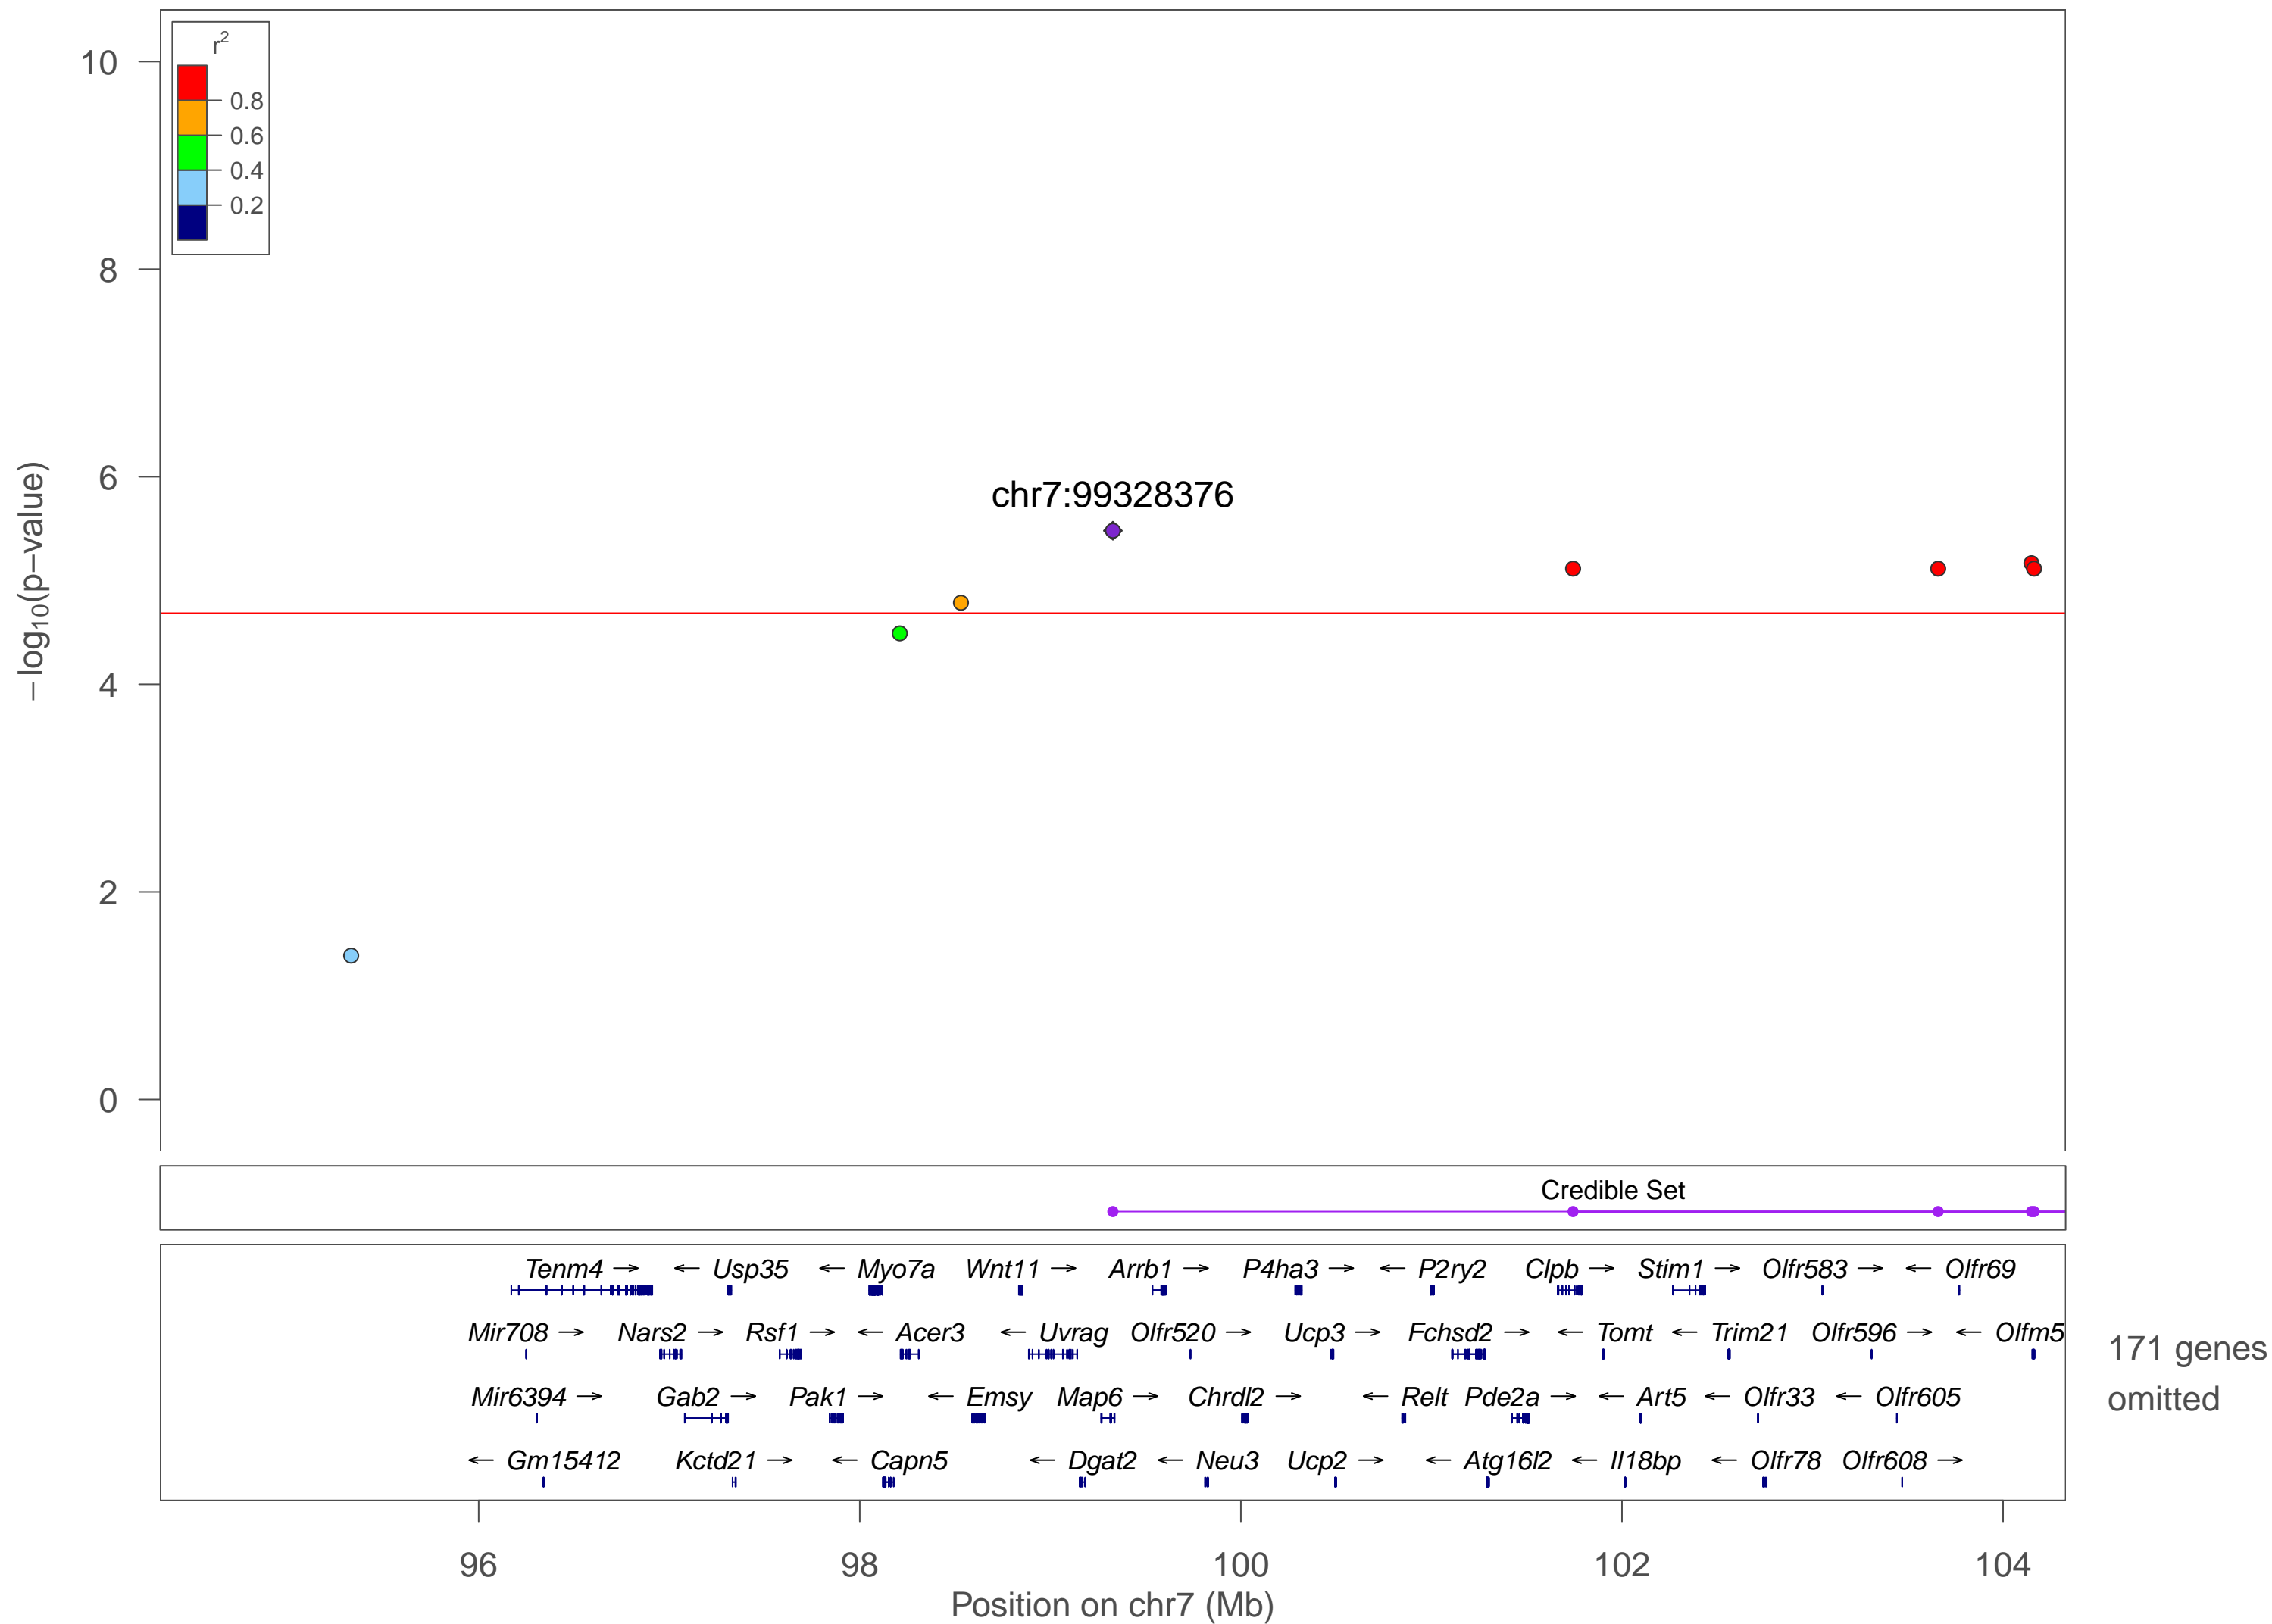

date: Thu Oct 25 16:51:12 2018

build: F34Array

display range: chr7:94328376–104328376 [94328376–104328376]

hilite range: 0 – 0 [ 0 – 0 ]

reference SNP: chr7:99328376

number of SNPs plotted: 9

min P-value: 3.32E–6 [chr7:99328376]

max P-value: 4.12E–2 [chr7:95330810]

omitted Genes: Gm15413, Alg8, Ndufc2

omitted Genes: Thrsp, Kctd14, Ints4

omitted Genes: Aamdc, Rsf1os1, Clns1a

omitted Genes: Aqp11, Gdpd4, Omp

omitted Genes: Gm16938, B3gnt6, Tsku

omitted Genes: Gucy2d, Lrrc32, Prkrir

omitted Genes: Mogat2, Gm26705, Serpinh1

omitted Genes: Gdpd5, Khlh35, Rps3

omitted Genes: Snord15b, Snord15a, Mir326

omitted Genes: Tpbgl, Slco2b1, Olfr521

omitted Genes: Spcs2, Xrra1, Rnf169

omitted Genes: Pold3, Lipt2, Kcne3

omitted Genes: Pgm2l1, Gpx2-ps1, Ppme1

omitted Genes: C2cd3, Dnajb13, Coa4

omitted Genes: Mrpl48, Rab6a, Plekhhb1

omitted Genes: Fam168a, Arhgef17, Mir3102

omitted Genes: P2ry6, Stard10, Arap1

omitted Genes: Mir139, Art2a-ps, Art2b

omitted Genes: Phox2a, Inpp1, Folr2

omitted Genes: Folr1, Anapc15, Lamtor1

omitted Genes: Lrrc51, Numa1, Rnf121

omitted Genes: Xndc1, Xntrpc, Trpc2

omitted Genes: Art1, Chrna10, Nup98

omitted Genes: Pgap2, Rhog, Rrm1

omitted Genes: Olfr543, Olfr544, Olfr545

omitted Genes: Olfr547, Olfr549, Olfr550

omitted Genes: Olfr551, Olfr552, Olfr553

omitted Genes: Olfr554, Olfr555, Olfr556

omitted Genes: Trim68, Olfr557, Olfr558

omitted Genes: Olfr559, Olfr560, Olfr561

omitted Genes: Olfr564, Olfr566, Olfr568

omitted Genes: Olfr569, Olfr570, Olfr571

Make more plots at <http://csg.sph.umich.edu/locuszoom/>

Fine-mapping Regions

| snp            | chr | pos (Mb)  | pp        | group        | color  |
|----------------|-----|-----------|-----------|--------------|--------|
| chr7:99328376  | 7   | 99.32838  | 0.3050743 | Credible Set | purple |
| chr7:101743401 | 7   | 101.74340 | 0.1364009 | Credible Set | purple |
| chr7:103659355 | 7   | 103.65936 | 0.1364009 | Credible Set | purple |
| chr7:104149022 | 7   | 104.14902 | 0.1531233 | Credible Set | purple |
| chr7:104162444 | 7   | 104.16244 | 0.1364009 | Credible Set | purple |
| chr7:104581631 | 7   | 104.58163 | 0.1325995 | Credible Set | purple |

F34 Array, retic parameters red cell distribution width, repeat

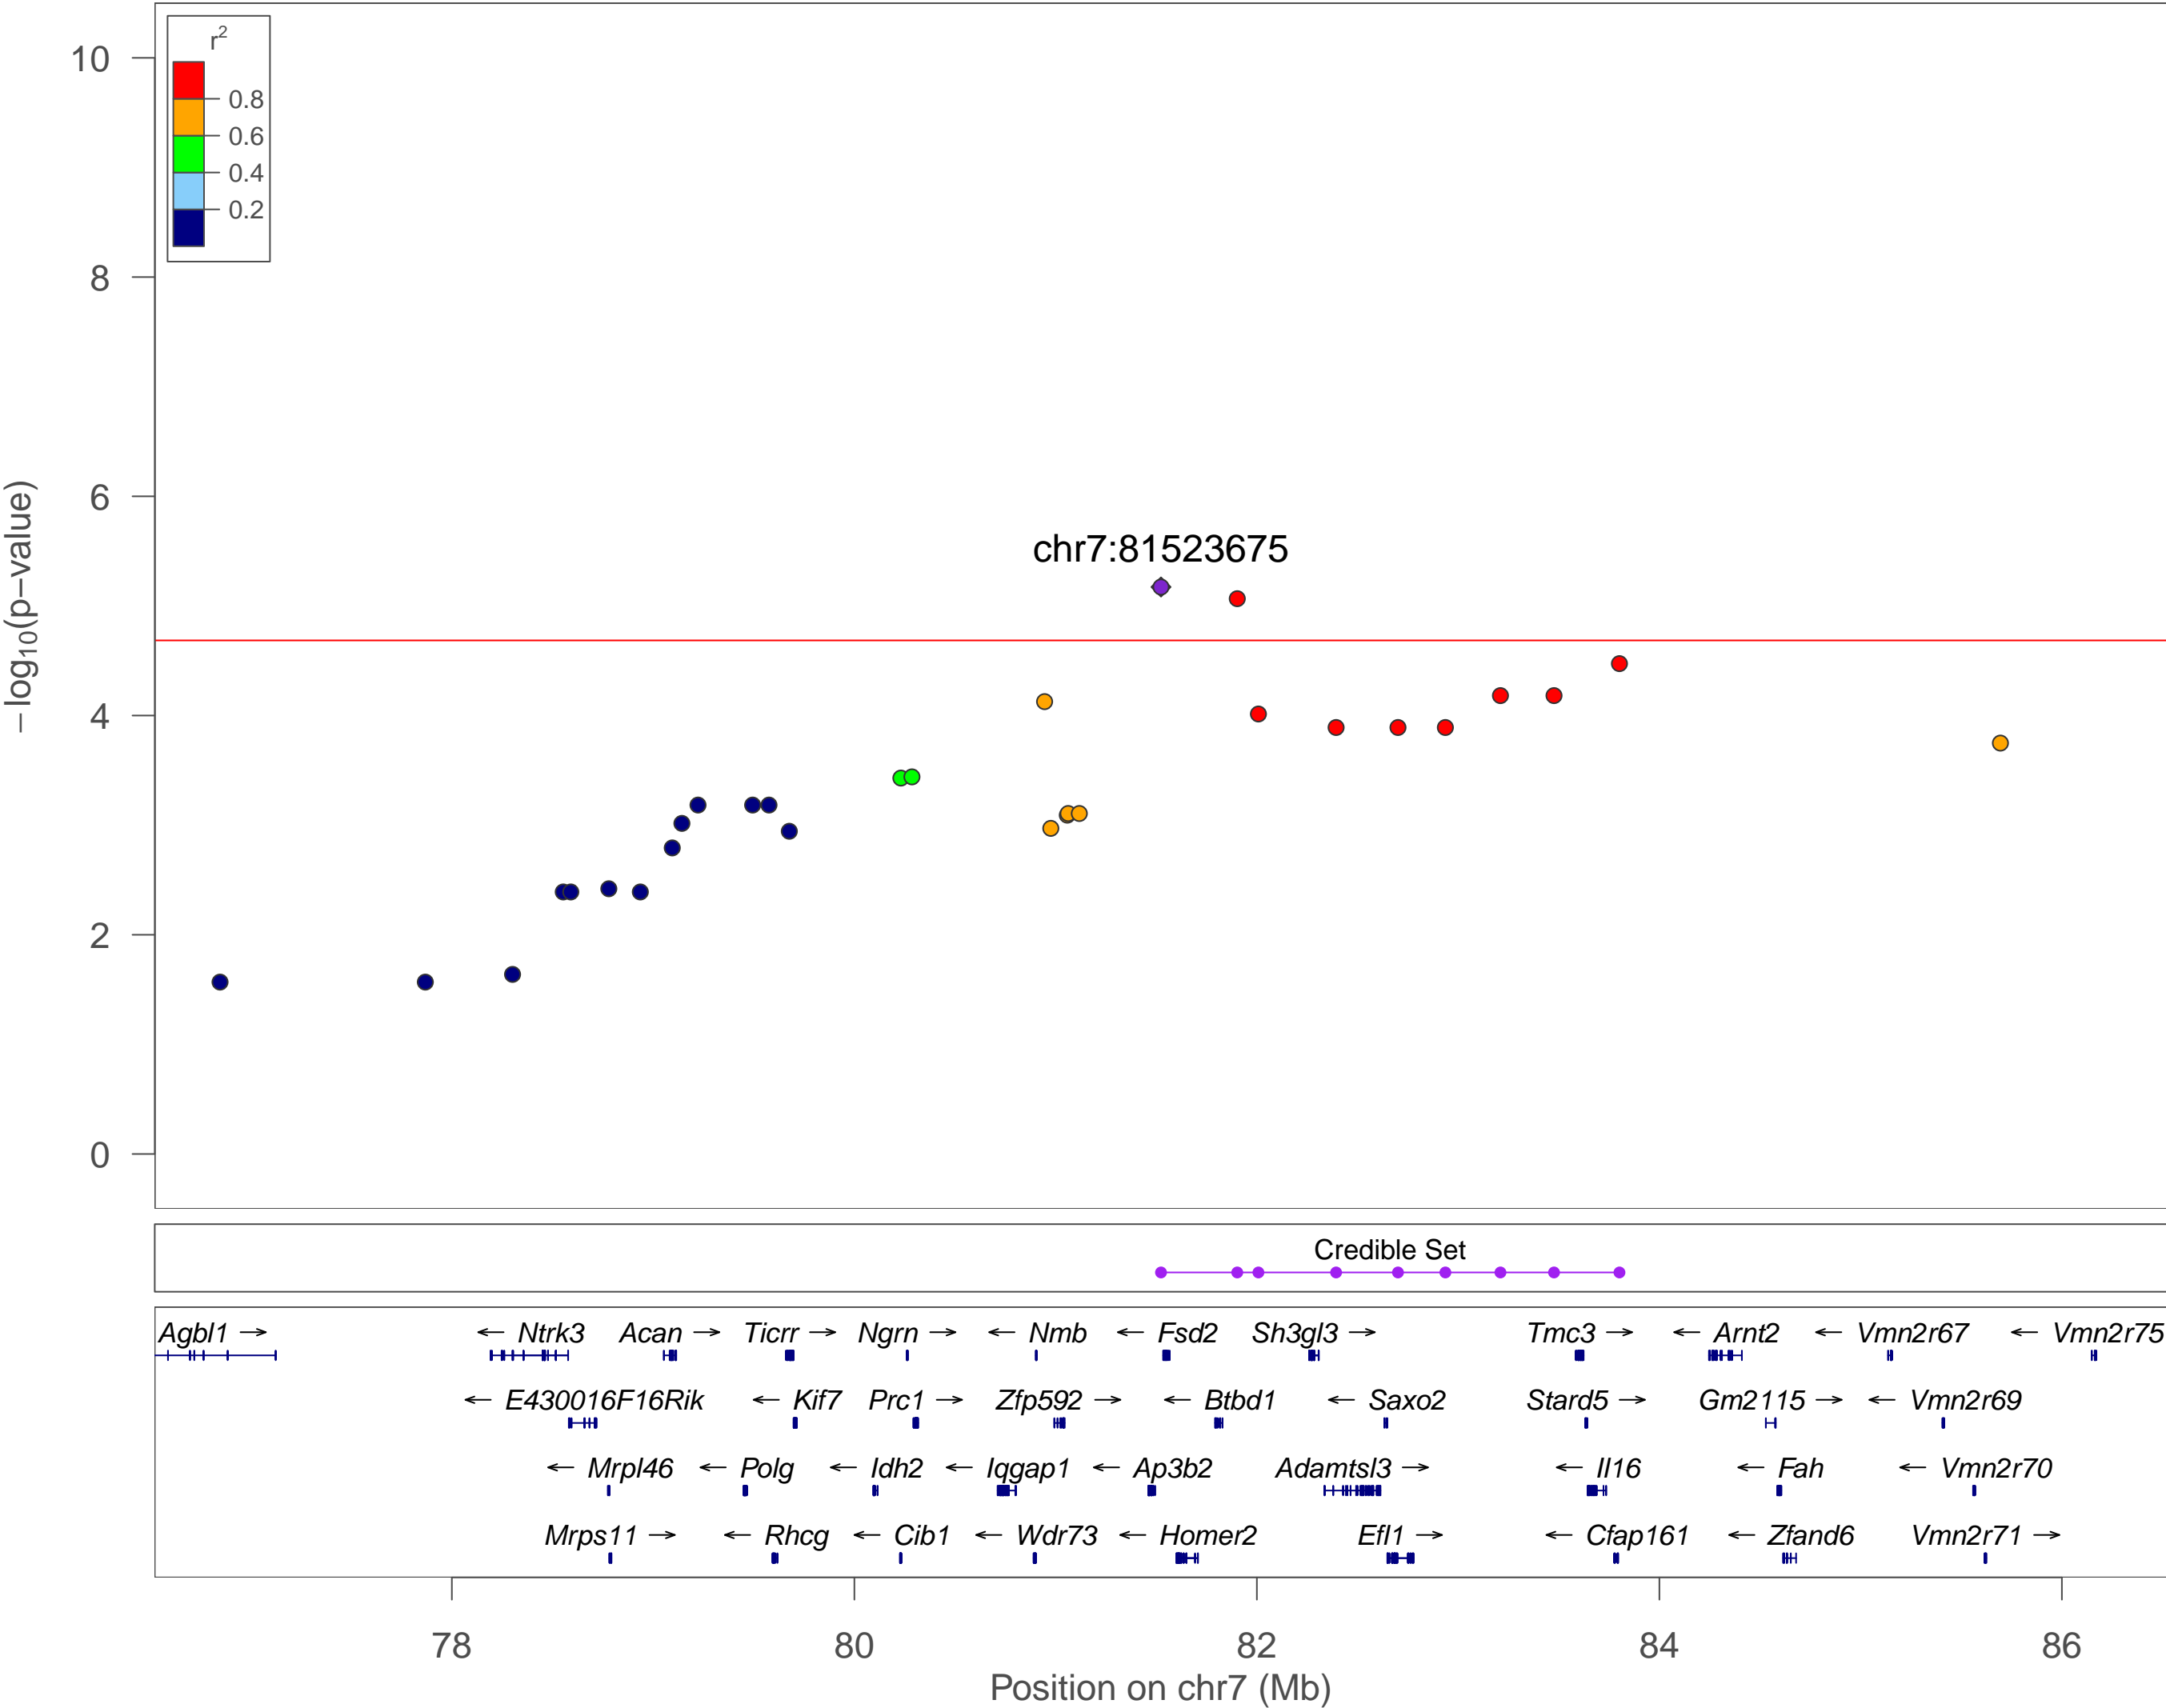

date: Thu Oct 25 16:51:19 2018  
build: F34Array  
display range: chr7:76523675–86523675 [76523675–86523675]  
hilite range: 0 – 0 [ 0 – 0 ]  
reference SNP: chr7:81523675  
number of SNPs plotted: 31  
min P-value: 6.72E–6 [chr7:81523675]  
max P-value: 2.7E–2 [chr7:76848144]  
omitted Genes: Det1, Mir7–2, Aen  
omitted Genes: Isg20, Gm26633, Hapln3  
omitted Genes: Mfge8, Abhd2, Rlbp1  
omitted Genes: Fanci, Mir9–3hg, Mir9–3  
omitted Genes: Plin1, Pex11a, Wdr93  
omitted Genes: Mesp1, Mesp2, Anpep  
omitted Genes: Ap3s2, Arpin, Zfp710  
omitted Genes: Gm21057, Sema4b, Gdpgp1  
omitted Genes: Ttl13, Vps33b, Rccd1  
omitted Genes: Unc45a, Hddc3, Man2a2  
omitted Genes: Fes, Furin, Blm  
omitted Genes: Crtc3, Gm15880, Zscan2  
omitted Genes: Sec11a, Alpk3, Slc28a1  
omitted Genes: Pde8a, Rps17, Cpeb1  
omitted Genes: BC048679, 2900076A07Rik, Mir1839  
omitted Genes: Whamm, Fam103a1, 3110040N11Rik  
omitted Genes: Tm6sf1, Hdgfrp3, Bnc1  
omitted Genes: Gm20744, 4933406J10Rik, Mex3b  
omitted Genes: 4933430H16Rik, Mesdc1, Mesdc2  
omitted Genes: Cemip, Abhd17c, 2610206C17Rik  
omitted Genes: Olfr291, Olfr290, Vmn2r65  
omitted Genes: Vmn2r66, Vmn2r68, Vmn2r72  
omitted Genes: Vmn2r73, Vmn2r74, Vmn2r76  
omitted Genes: Olfr310, Olfr309, Olfr308  
omitted Genes: Olfr307, Olfr305, Olfr304  
omitted Genes: Olfr303, Olfr301, Olfr299  
omitted Genes: Olfr298



Fine-mapping Regions

| snp           | chr | pos (Mb) | pp         | group        | color  |
|---------------|-----|----------|------------|--------------|--------|
| chr7:81523675 | 7   | 81.52367 | 0.40068110 | Credible Set | purple |
| chr7:81902543 | 7   | 81.90254 | 0.31702067 | Credible Set | purple |
| chr7:82007699 | 7   | 82.00770 | 0.03171553 | Credible Set | purple |
| chr7:82393693 | 7   | 82.39369 | 0.02426518 | Credible Set | purple |
| chr7:82701107 | 7   | 82.70111 | 0.02426518 | Credible Set | purple |
| chr7:82936666 | 7   | 82.93667 | 0.02426518 | Credible Set | purple |
| chr7:83210268 | 7   | 83.21027 | 0.04570385 | Credible Set | purple |
| chr7:83476529 | 7   | 83.47653 | 0.04570385 | Credible Set | purple |
| chr7:83801589 | 7   | 83.80159 | 0.08637946 | Credible Set | purple |

F34 Array, retic parameters hemoglobin distribution width, repeat

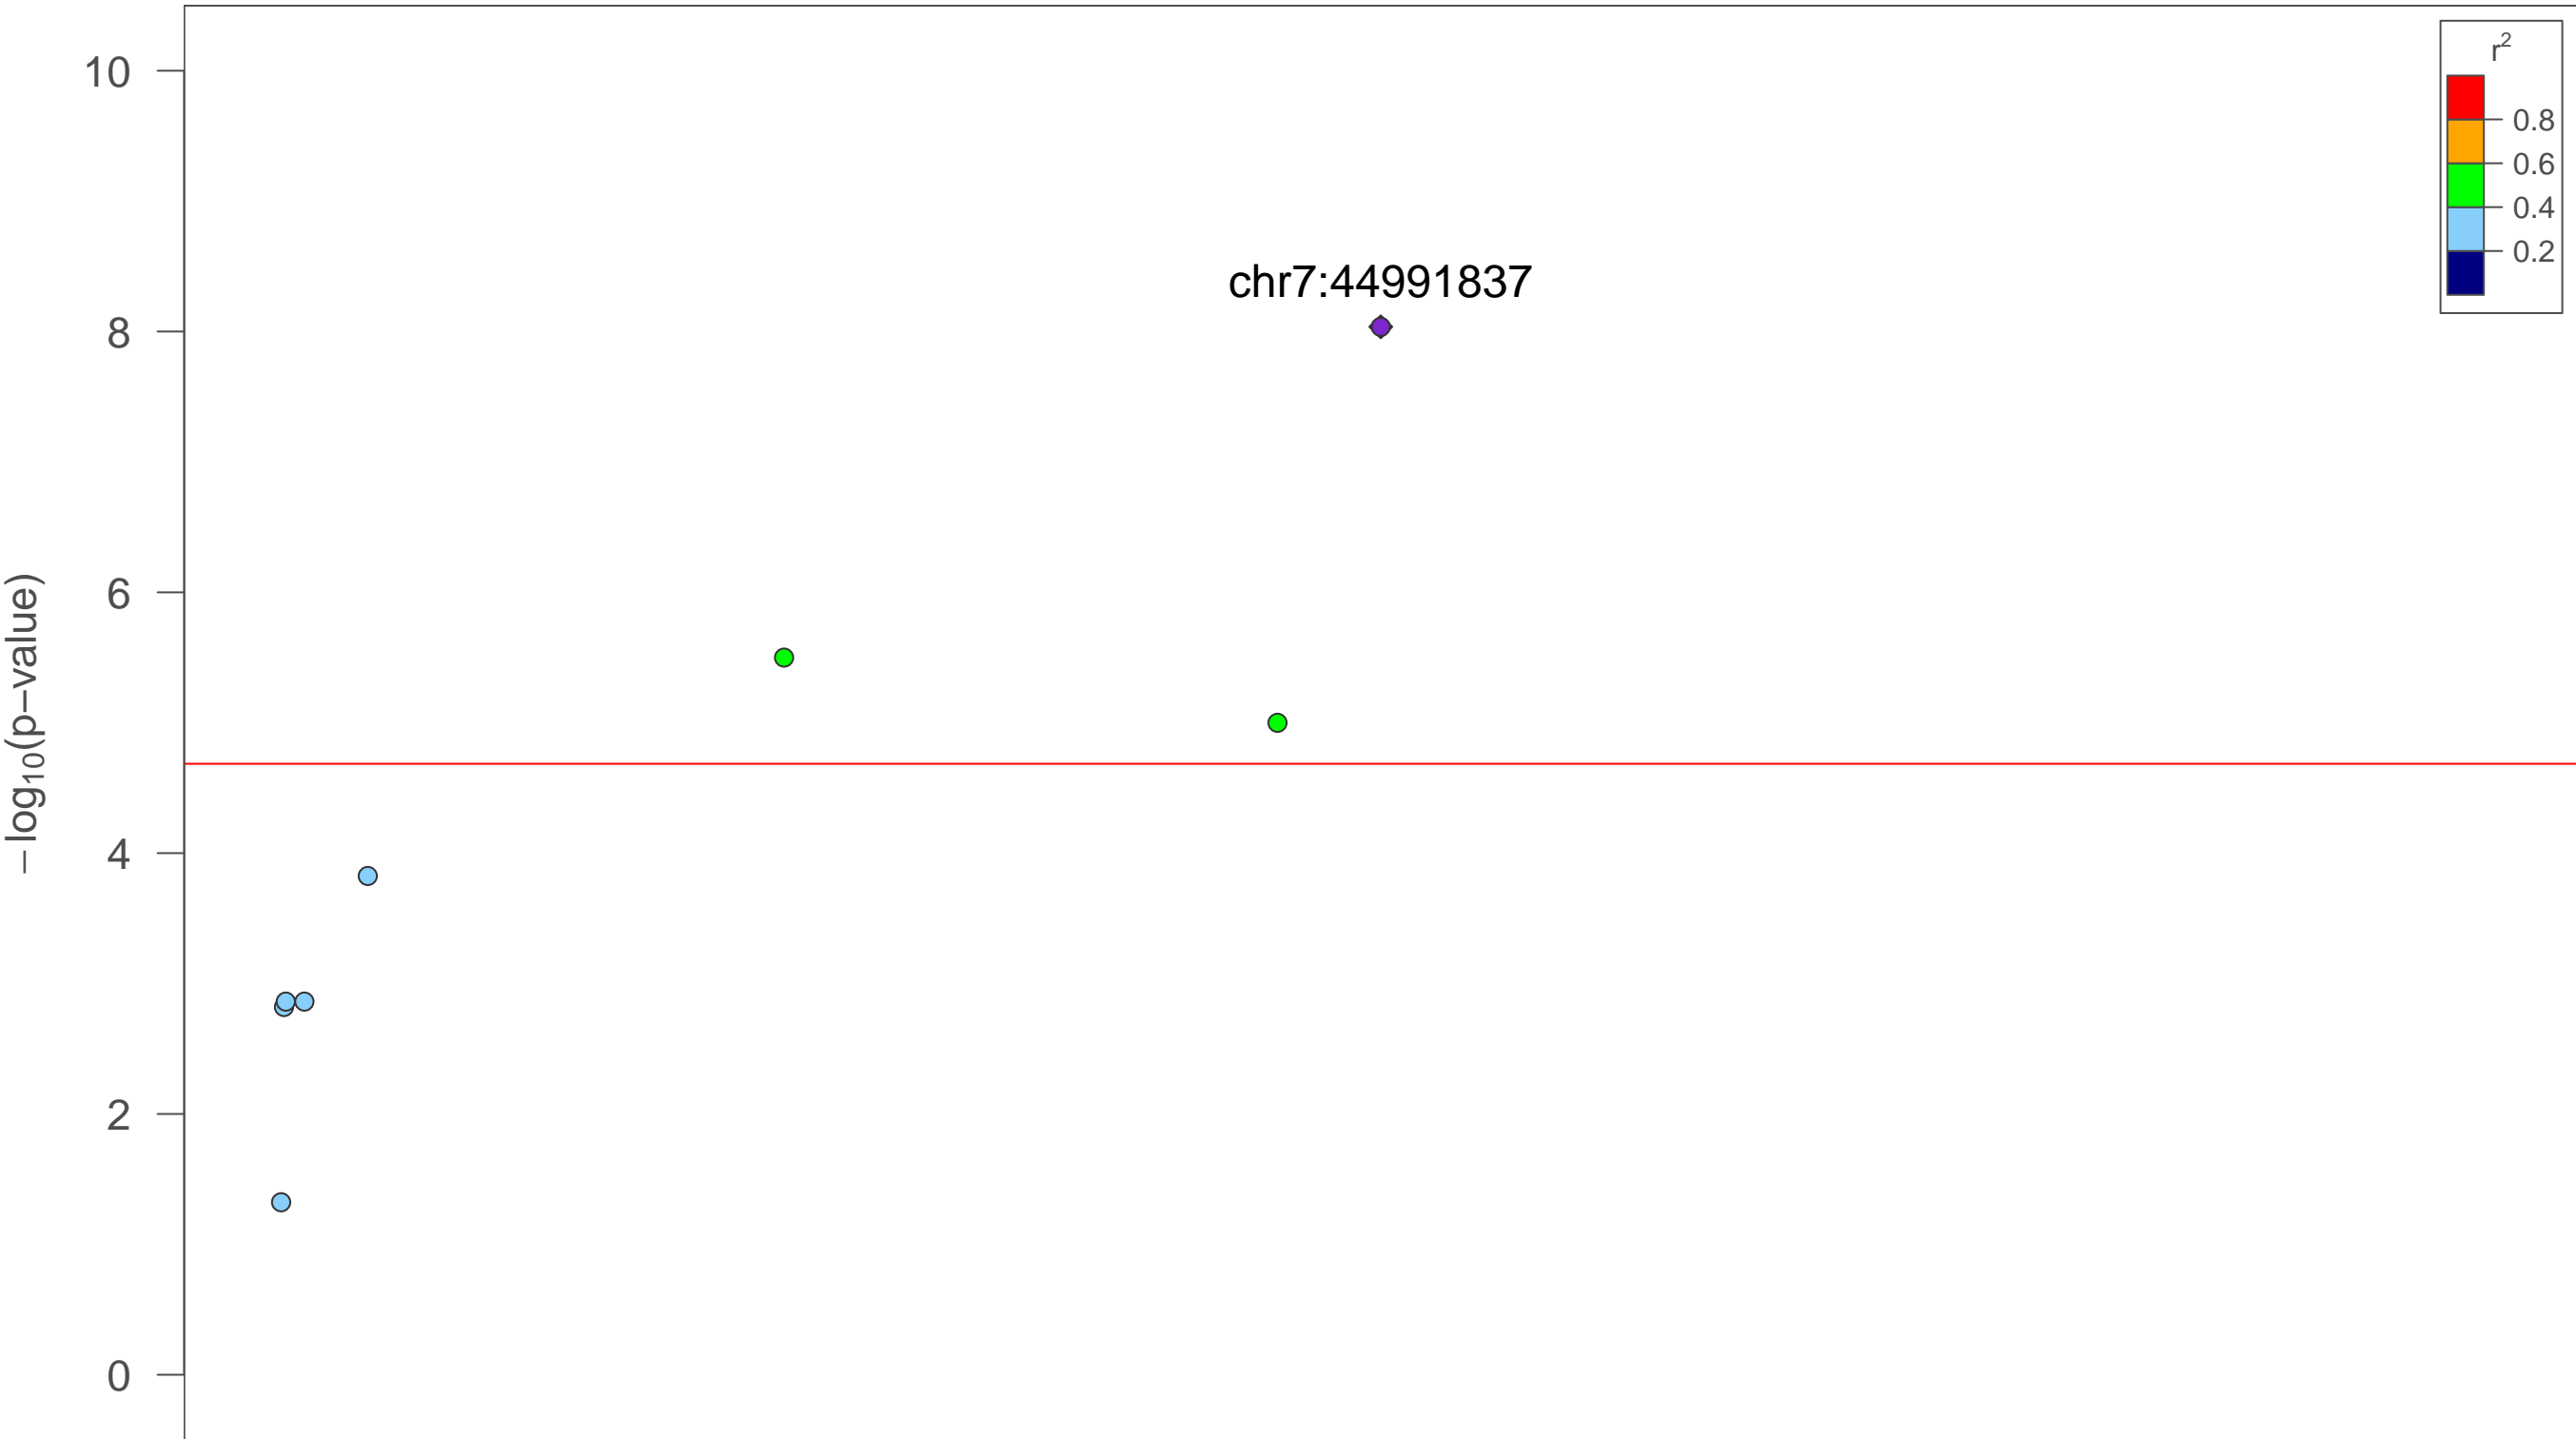

Credible Set

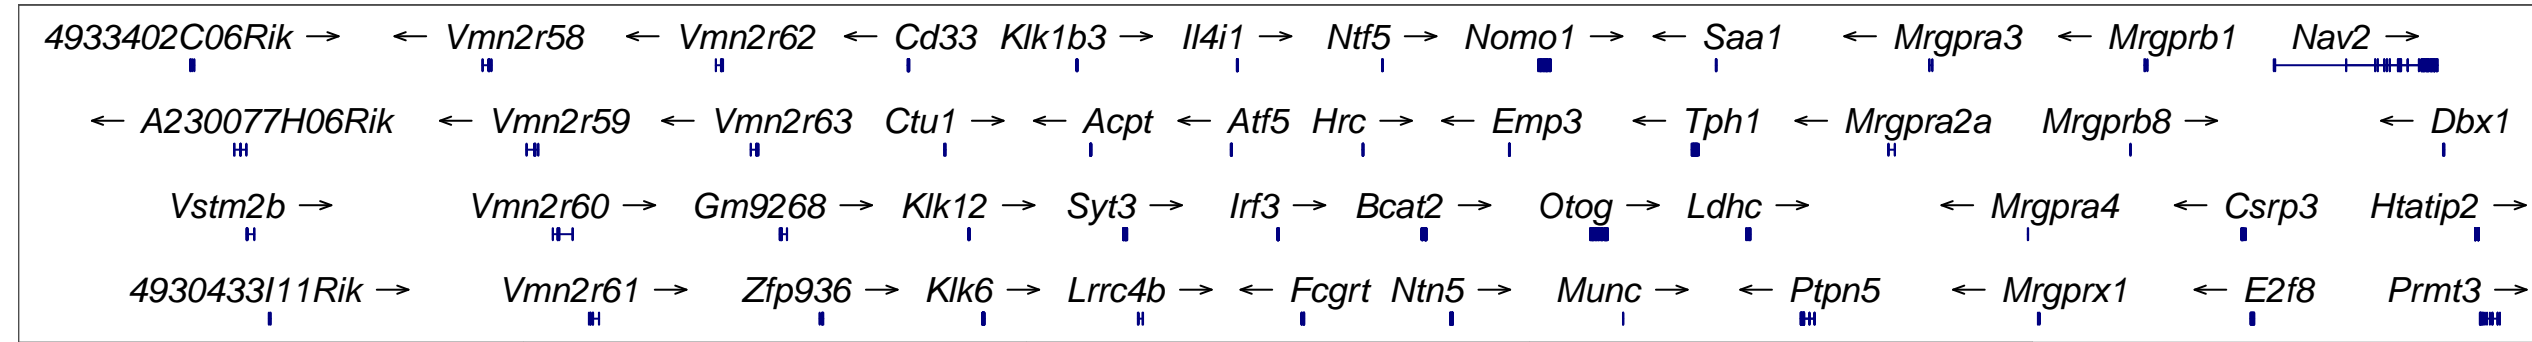

199 genes  
omitted

40 42 44 46 48

Position on chr7 (Mb)

date: Thu Oct 25 16:51:40 2018

build: F34Array

display range: chr7:39991837–49991837 [39991837–49991837]

hilite range: 0 – 0 [ 0 – 0 ]

reference SNP: chr7:44991837

number of SNPs plotted: 9

min P-value: 9.2E–9 [chr7:44991837]

max P-value: 4.75E–2 [chr7:40397482]

omitted Genes: Gm4884, 1700110I07Rik, Gm5592

omitted Genes: AI987944, Vmn2r57, AW146154

omitted Genes: Zfp788, Vmn2r-ps54, Vmn2r-ps60

omitted Genes: 4933421I07Rik, Zfp141, 9830147E19Rik

omitted Genes: Gm5595, Gm2381, EU599041

omitted Genes: Zfp715, Siglecf, Siglecg

omitted Genes: Lim2, Nkg7, Cldnd2

omitted Genes: Etfb, Mir7051, Vsig10l

omitted Genes: Iglon5, 4931406B18Rik, Zfp658

omitted Genes: Zfp719, Zfp819, Ceacam18

omitted Genes: Siglece, Klk14, Klk13

omitted Genes: 2310002F09Rik, Klk11, Klk10

omitted Genes: Klk9, Klk8, Klk7

omitted Genes: Klk5, Klk4, Klk15

omitted Genes: Klk1b7-ps, Klk1b8, Klk1b1

omitted Genes: Klk1b9, Klk1b11, Klk1b26

omitted Genes: Klk1b27, Klk1b21, Klk1b22

omitted Genes: Klk1b16, Klk1b24, Klk1b4

omitted Genes: Klk1b5, Klk1, 1700028J19Rik

omitted Genes: 2410002F23Rik, Snord88c, Snord88a

omitted Genes: Clec11a, Shank1, 1700008O03Rik

omitted Genes: Aspdh, Josd2, Mir7052

omitted Genes: 5430431A17Rik, Emc10, Fam71e1

omitted Genes: Mybpc2, Spib, Pold1

omitted Genes: Mir7053, Nr1h2, Napsa

omitted Genes: Kcnc3, Myh14, Izumo2

omitted Genes: Zfp473, Vrk3, Nup62

omitted Genes: Gm21948, Tbc1d17, Akt1s1

omitted Genes: Mir707, Pnkp, Ptov1

omitted Genes: Med25, Fuz, Ap2a1

omitted Genes: Tsks, Cpt1c, Prr1

omitted Genes: Gm15545, Bcl2l12, Scf1

Make more plots at <http://csg.sph.umich.edu/locuszoom/>

Fine-mapping Regions

| snp           | chr | pos (Mb) | pp | group        | color  |
|---------------|-----|----------|----|--------------|--------|
| chr7:44991837 | 7   | 44.99184 | 1  | Credible Set | purple |

F34 Array, retic parameters hemoglobin distribution width, repeat

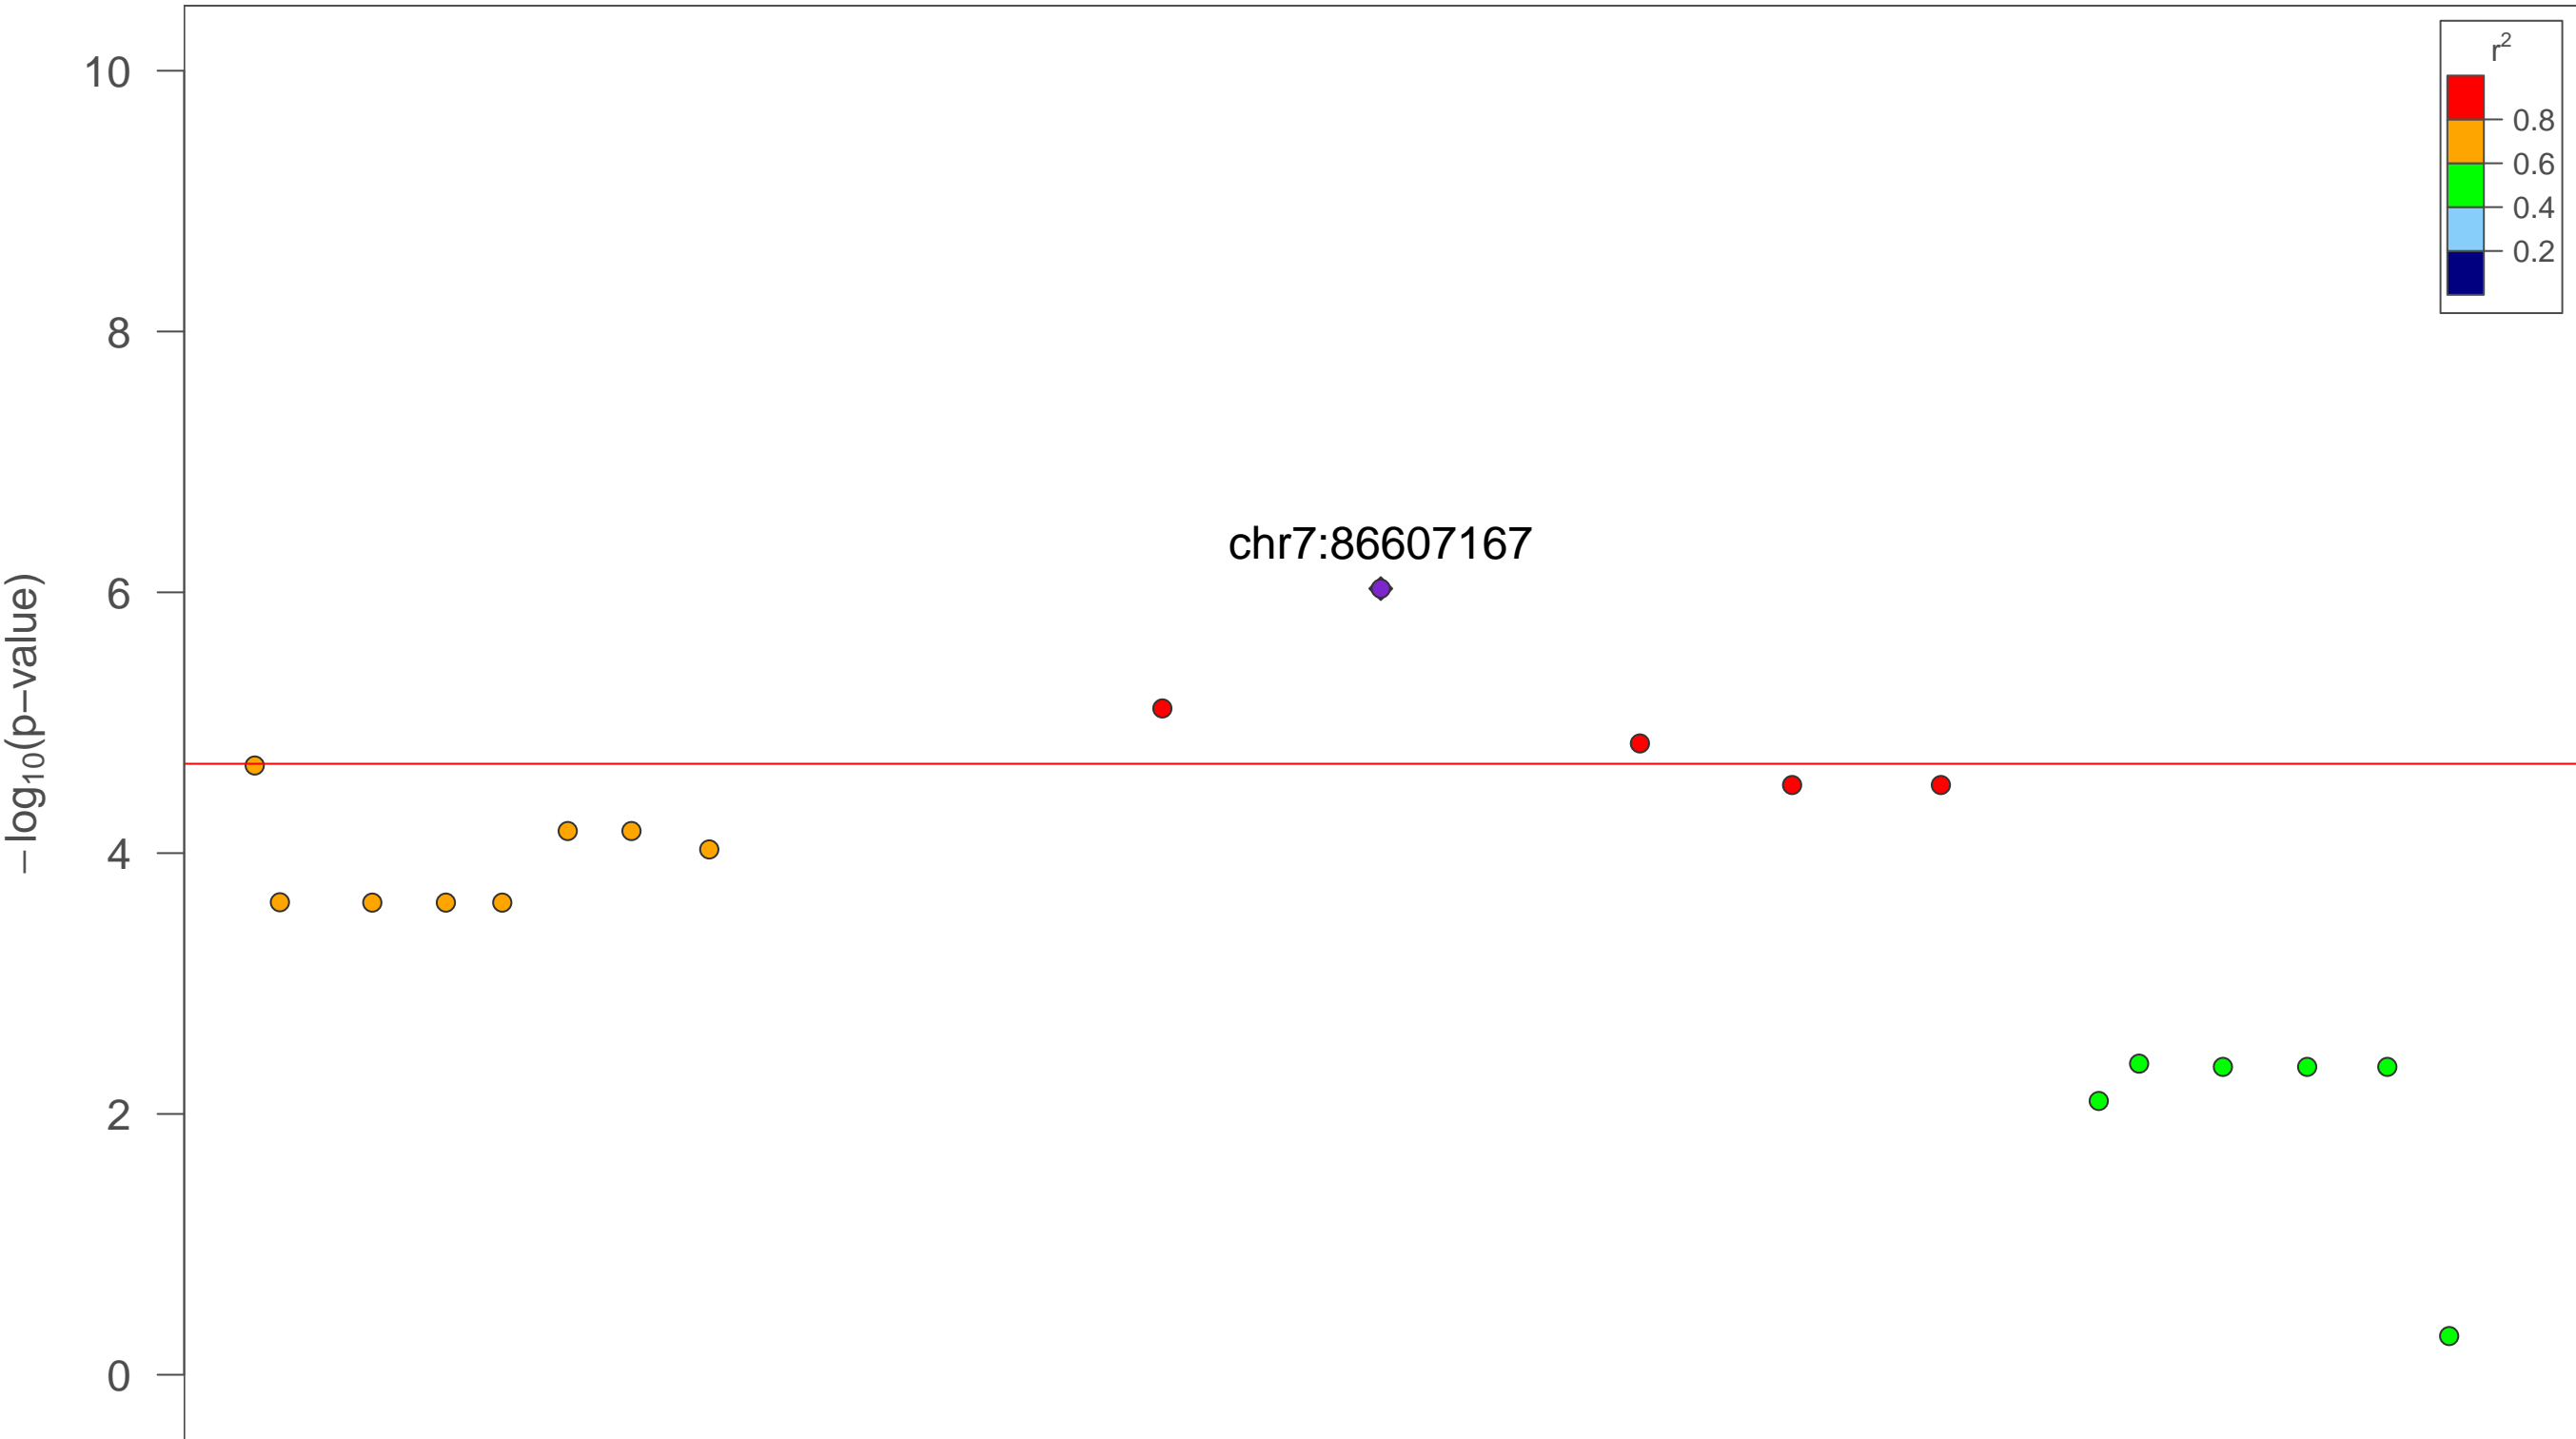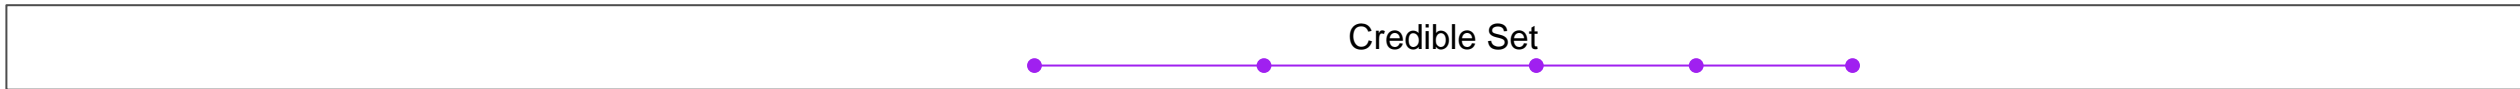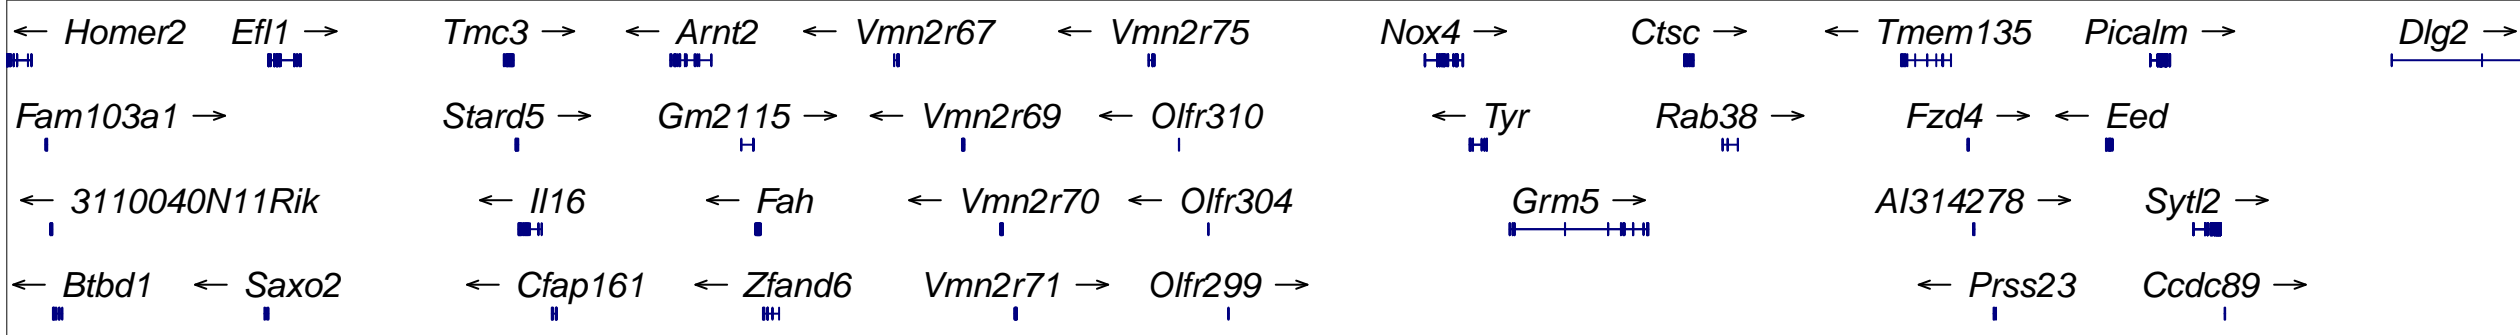

48 genes  
omitted

date: Thu Oct 25 16:51:47 2018  
build: F34Array  
display range: chr7:81607167–91607167 [81607167–91607167]  
hilite range: 0 – 0 [ 0 – 0 ]  
reference SNP: chr7:86607167  
number of SNPs plotted: 20  
min P-value: 9.36E–7 [chr7:86607167]  
max P-value: 5.05E–1 [chr7:91070939]  
omitted Genes: Tm6sf1, Hdgfrp3, Bnc1  
omitted Genes: Gm20744, Sh3gl3, Adamtsl3  
omitted Genes: 4933406J10Rik, Mex3b, 4933430H16Rik  
omitted Genes: Mesdc1, Mesdc2, Cemip  
omitted Genes: Abhd17c, 2610206C17Rik, Olfr291  
omitted Genes: Olfr290, Vmn2r65, Vmn2r66  
omitted Genes: Vmn2r68, Vmn2r72, Vmn2r73  
omitted Genes: Vmn2r74, Vmn2r76, Olfr309  
omitted Genes: Olfr308, Olfr307, Olfr305  
omitted Genes: Olfr303, Olfr301, Olfr298  
omitted Genes: Olfr297, Olfr295, Olfr294  
omitted Genes: Olfr293, Olfr292, Folh1  
omitted Genes: Vmn2r77, Vmn2r78, Vmn2r79  
omitted Genes: Me3, Ccdc81, l7Rn6  
omitted Genes: E230029C05Rik, 2310010J17Rik, Ccdc83  
omitted Genes: Crebzf, Tmem126a, Tmem126b

Fine-mapping Regions

| snp           | chr | pos (Mb) | pp         | group        | color  |
|---------------|-----|----------|------------|--------------|--------|
| chr7:85694603 | 7   | 85.69460 | 0.10284755 | Credible Set | purple |
| chr7:86607167 | 7   | 86.60717 | 0.78343314 | Credible Set | purple |
| chr7:87689885 | 7   | 87.68989 | 0.05701918 | Credible Set | purple |
| chr7:88325650 | 7   | 88.32565 | 0.02835006 | Credible Set | purple |
| chr7:88947234 | 7   | 88.94723 | 0.02835006 | Credible Set | purple |

F34 Array, retic parameters hemoglobin distribution width, repeat

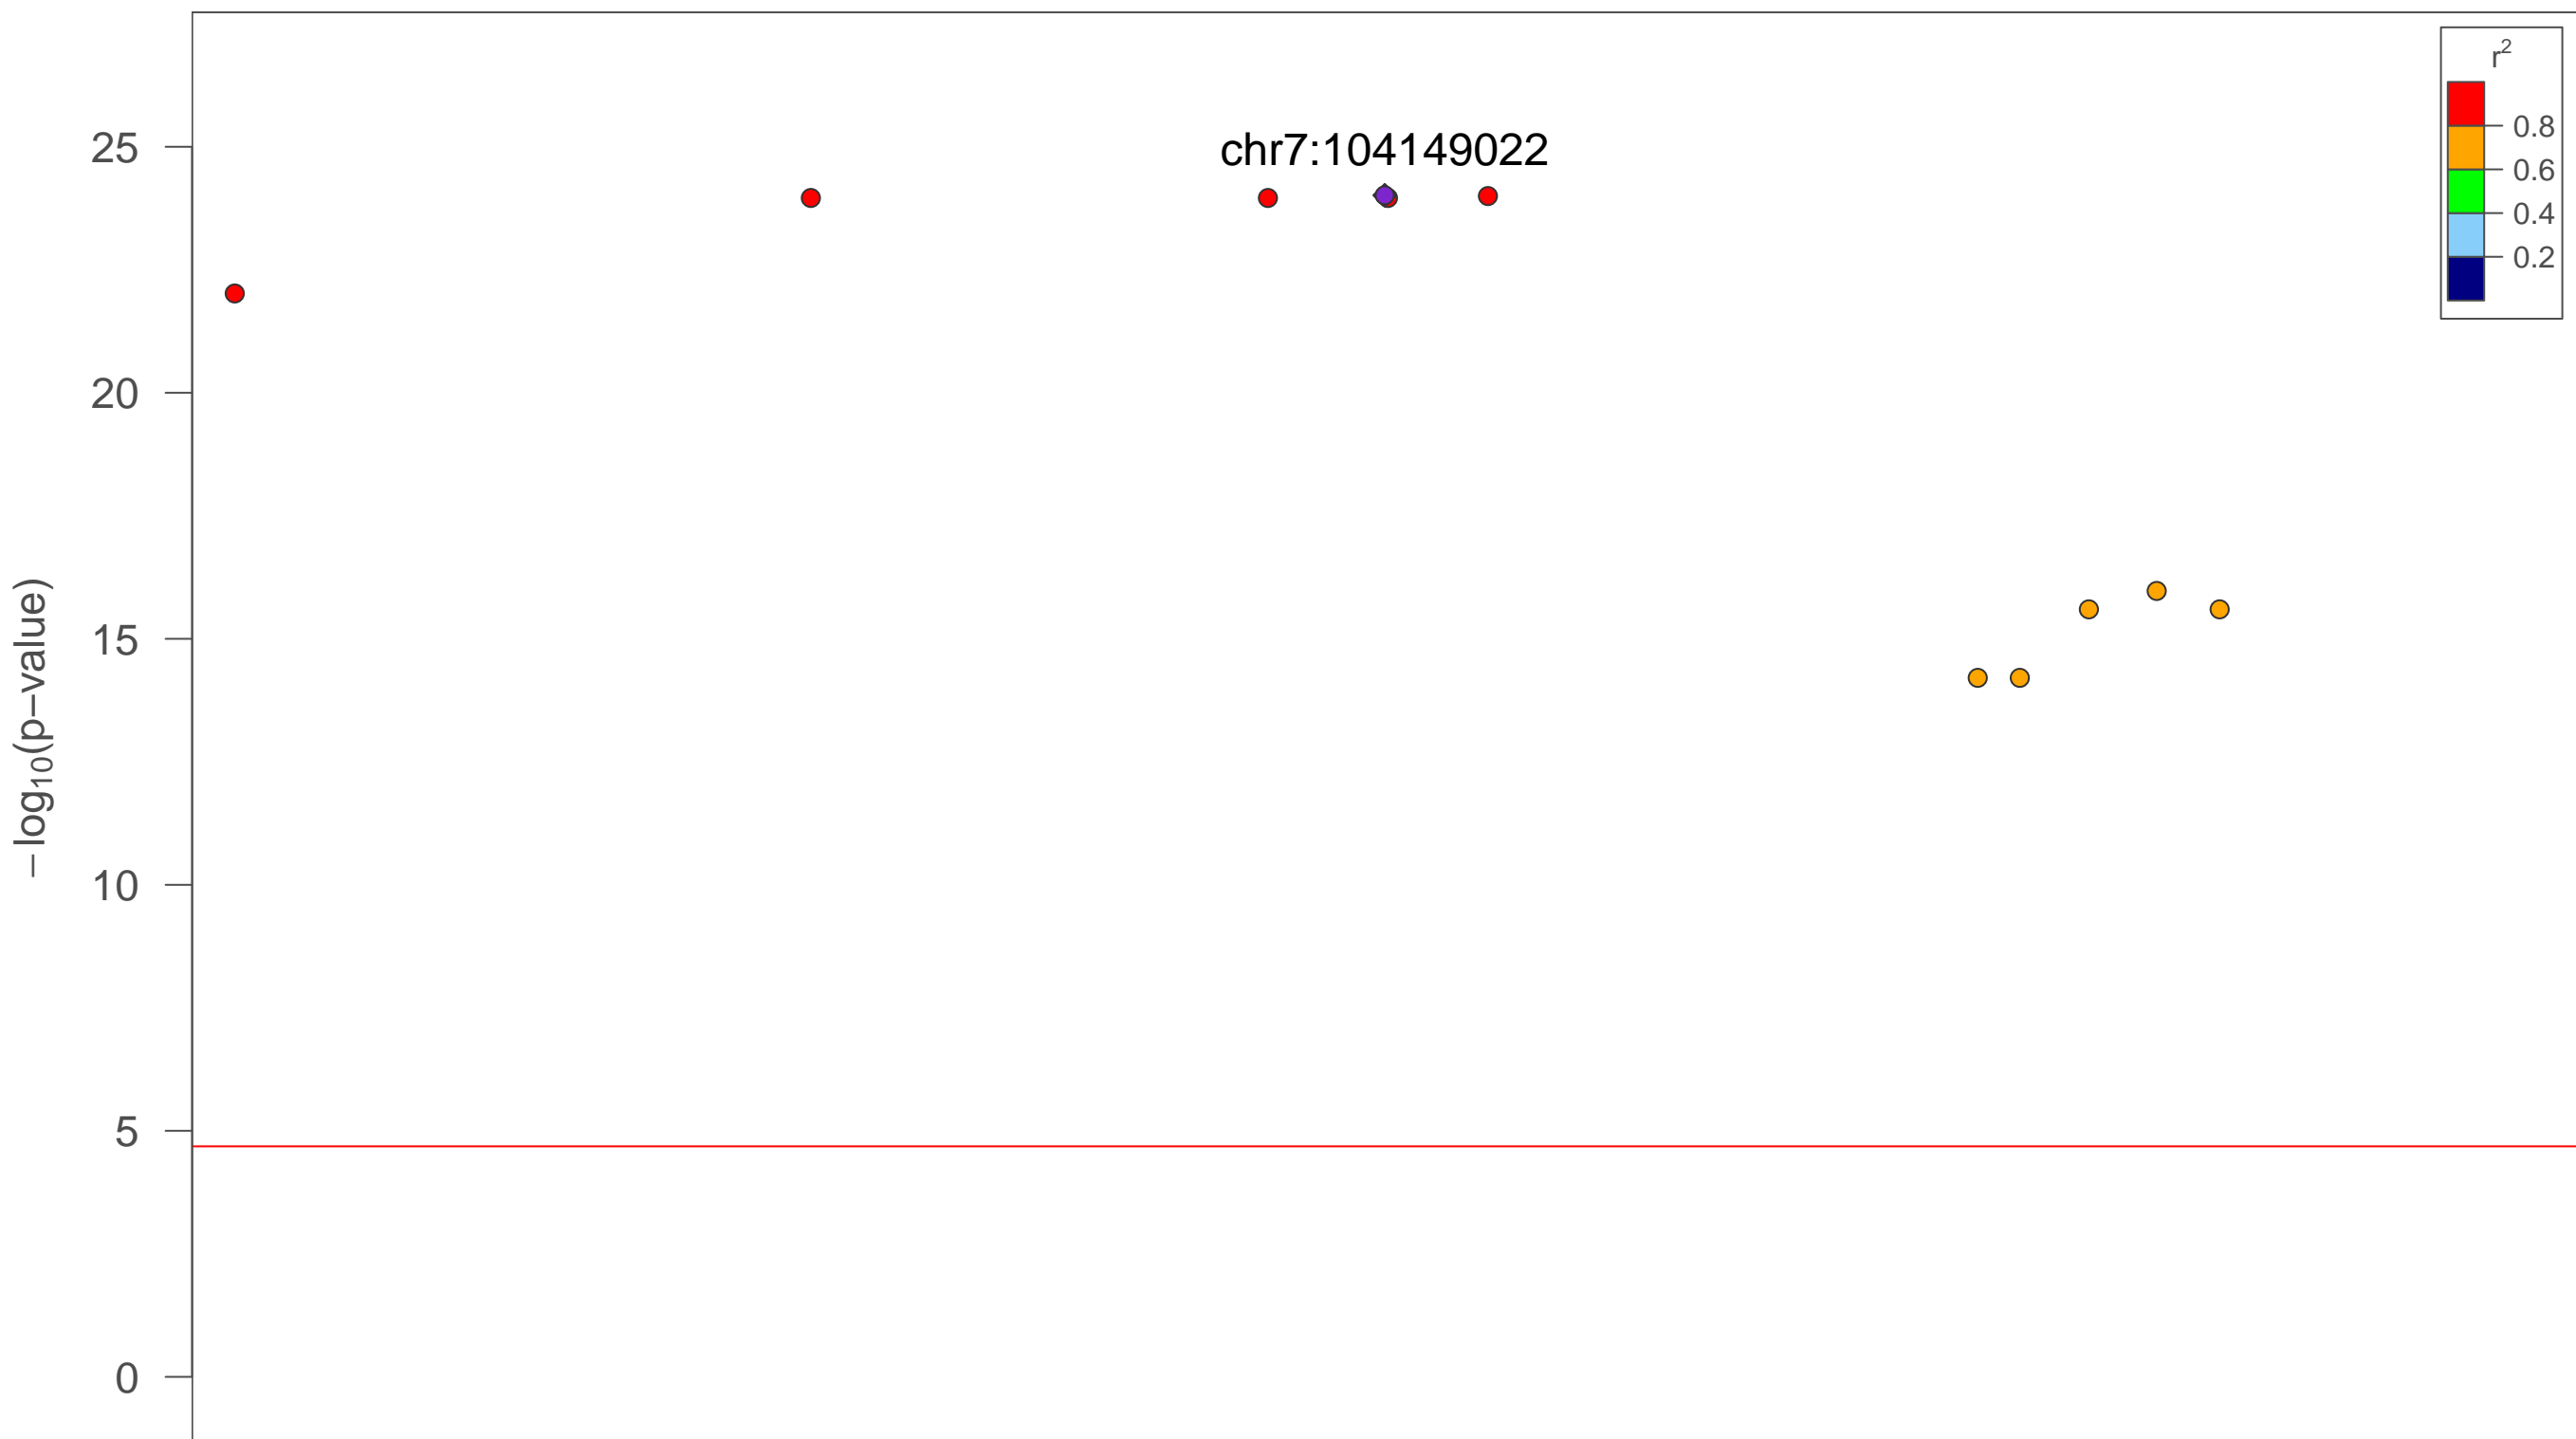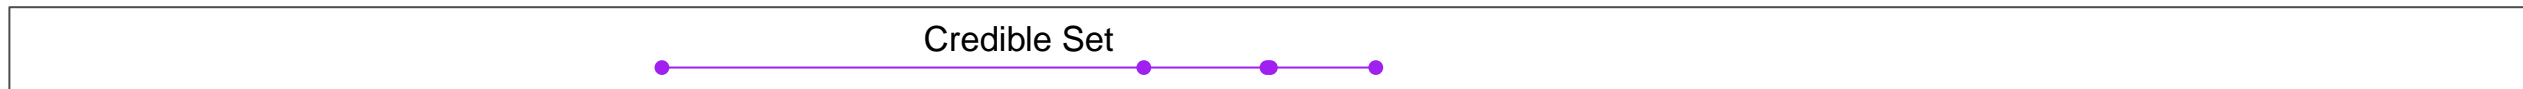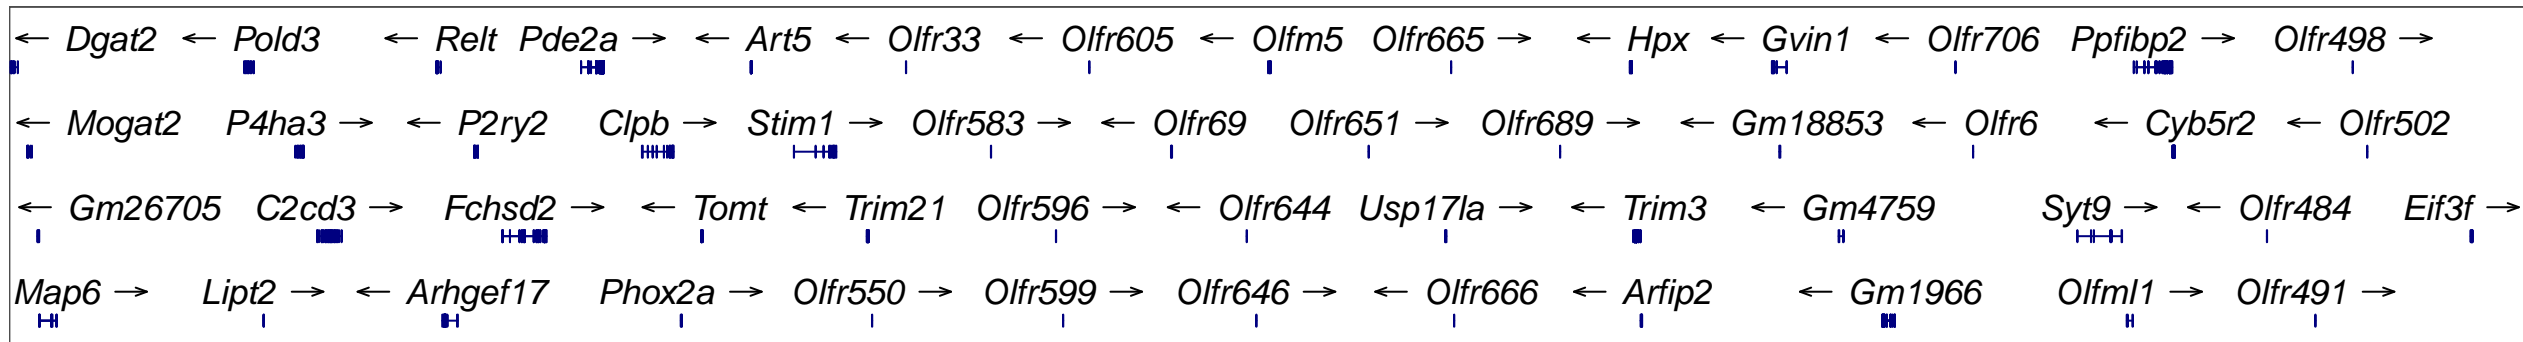

277 genes  
omitted



date: Thu Oct 25 16:51:30 2018

build: F34Array

display range: chr7:99149022–109149022 [99149022–109149022]

hilite range: 0 – 0 [ 0 – 0 ]

reference SNP: chr7:104149022

number of SNPs plotted: 12

min P-value: 9.67E–25 [chr7:104149022]

max P-value: 6.21E–15 [chr7:106634943]

omitted Genes: Serpinh1, Gdpd5, Khlh35

omitted Genes: Rps3, Snord15b, Snord15a

omitted Genes: Arrb1, Mir326, Tpbgl

omitted Genes: Slco2b1, Olfr520, Olfr521

omitted Genes: Neu3, Spcs2, Xrra1

omitted Genes: Rnf169, Chrdl2, Kcne3

omitted Genes: Pgm2l1, Gpx2-ps1, Ppme1

omitted Genes: Ucp3, Ucp2, Dnajb13

omitted Genes: Coa4, Mrpl48, Rab6a

omitted Genes: Plekhhb1, Fam168a, Mir3102

omitted Genes: P2ry6, Atg16l2, Stard10

omitted Genes: Arap1, Mir139, Art2a-ps

omitted Genes: Art2b, Inpp1, Folr2

omitted Genes: Folr1, Anapc15, Lamtor1

omitted Genes: Lrrc51, Numa1, Il18bp

omitted Genes: Rnf121, Xndc1, Xntrpc

omitted Genes: Trpc2, Art1, Chrna10

omitted Genes: Nup98, Pgap2, Rhog

omitted Genes: Rrm1, Olfr543, Olfr544

omitted Genes: Olfr545, Olfr547, Olfr549

omitted Genes: Olfr551, Olfr552, Olfr553

omitted Genes: Olfr554, Olfr555, Olfr556

omitted Genes: Trim68, Olfr557, Olfr558

omitted Genes: Olfr559, Olfr78, Olfr560

omitted Genes: Olfr561, Olfr564, Olfr566

omitted Genes: Olfr568, Olfr569, Olfr570

omitted Genes: Olfr571, Olfr572, Olfr574

omitted Genes: Olfr575, Olfr576, Olfr577

omitted Genes: Olfr578, Olfr582, Olfr584

omitted Genes: Olfr585, Olfr586, Olfr589

omitted Genes: Olfr591, Olfr592, Olfr593

omitted Genes: Olfr594, Ucp17ld, Olfr597

Make more plots at <http://csg.sph.umich.edu/locuszoom/>

Fine-mapping Regions

| snp            | chr | pos (Mb) | pp        | group        | color  |
|----------------|-----|----------|-----------|--------------|--------|
| chr7:101743401 | 7   | 101.7434 | 0.1909593 | Credible Set | purple |
| chr7:103659355 | 7   | 103.6594 | 0.1909593 | Credible Set | purple |
| chr7:104149022 | 7   | 104.1490 | 0.2159842 | Credible Set | purple |
| chr7:104162444 | 7   | 104.1624 | 0.1909593 | Credible Set | purple |
| chr7:104581631 | 7   | 104.5816 | 0.2088515 | Credible Set | purple |

F34 Array, coat color, albino

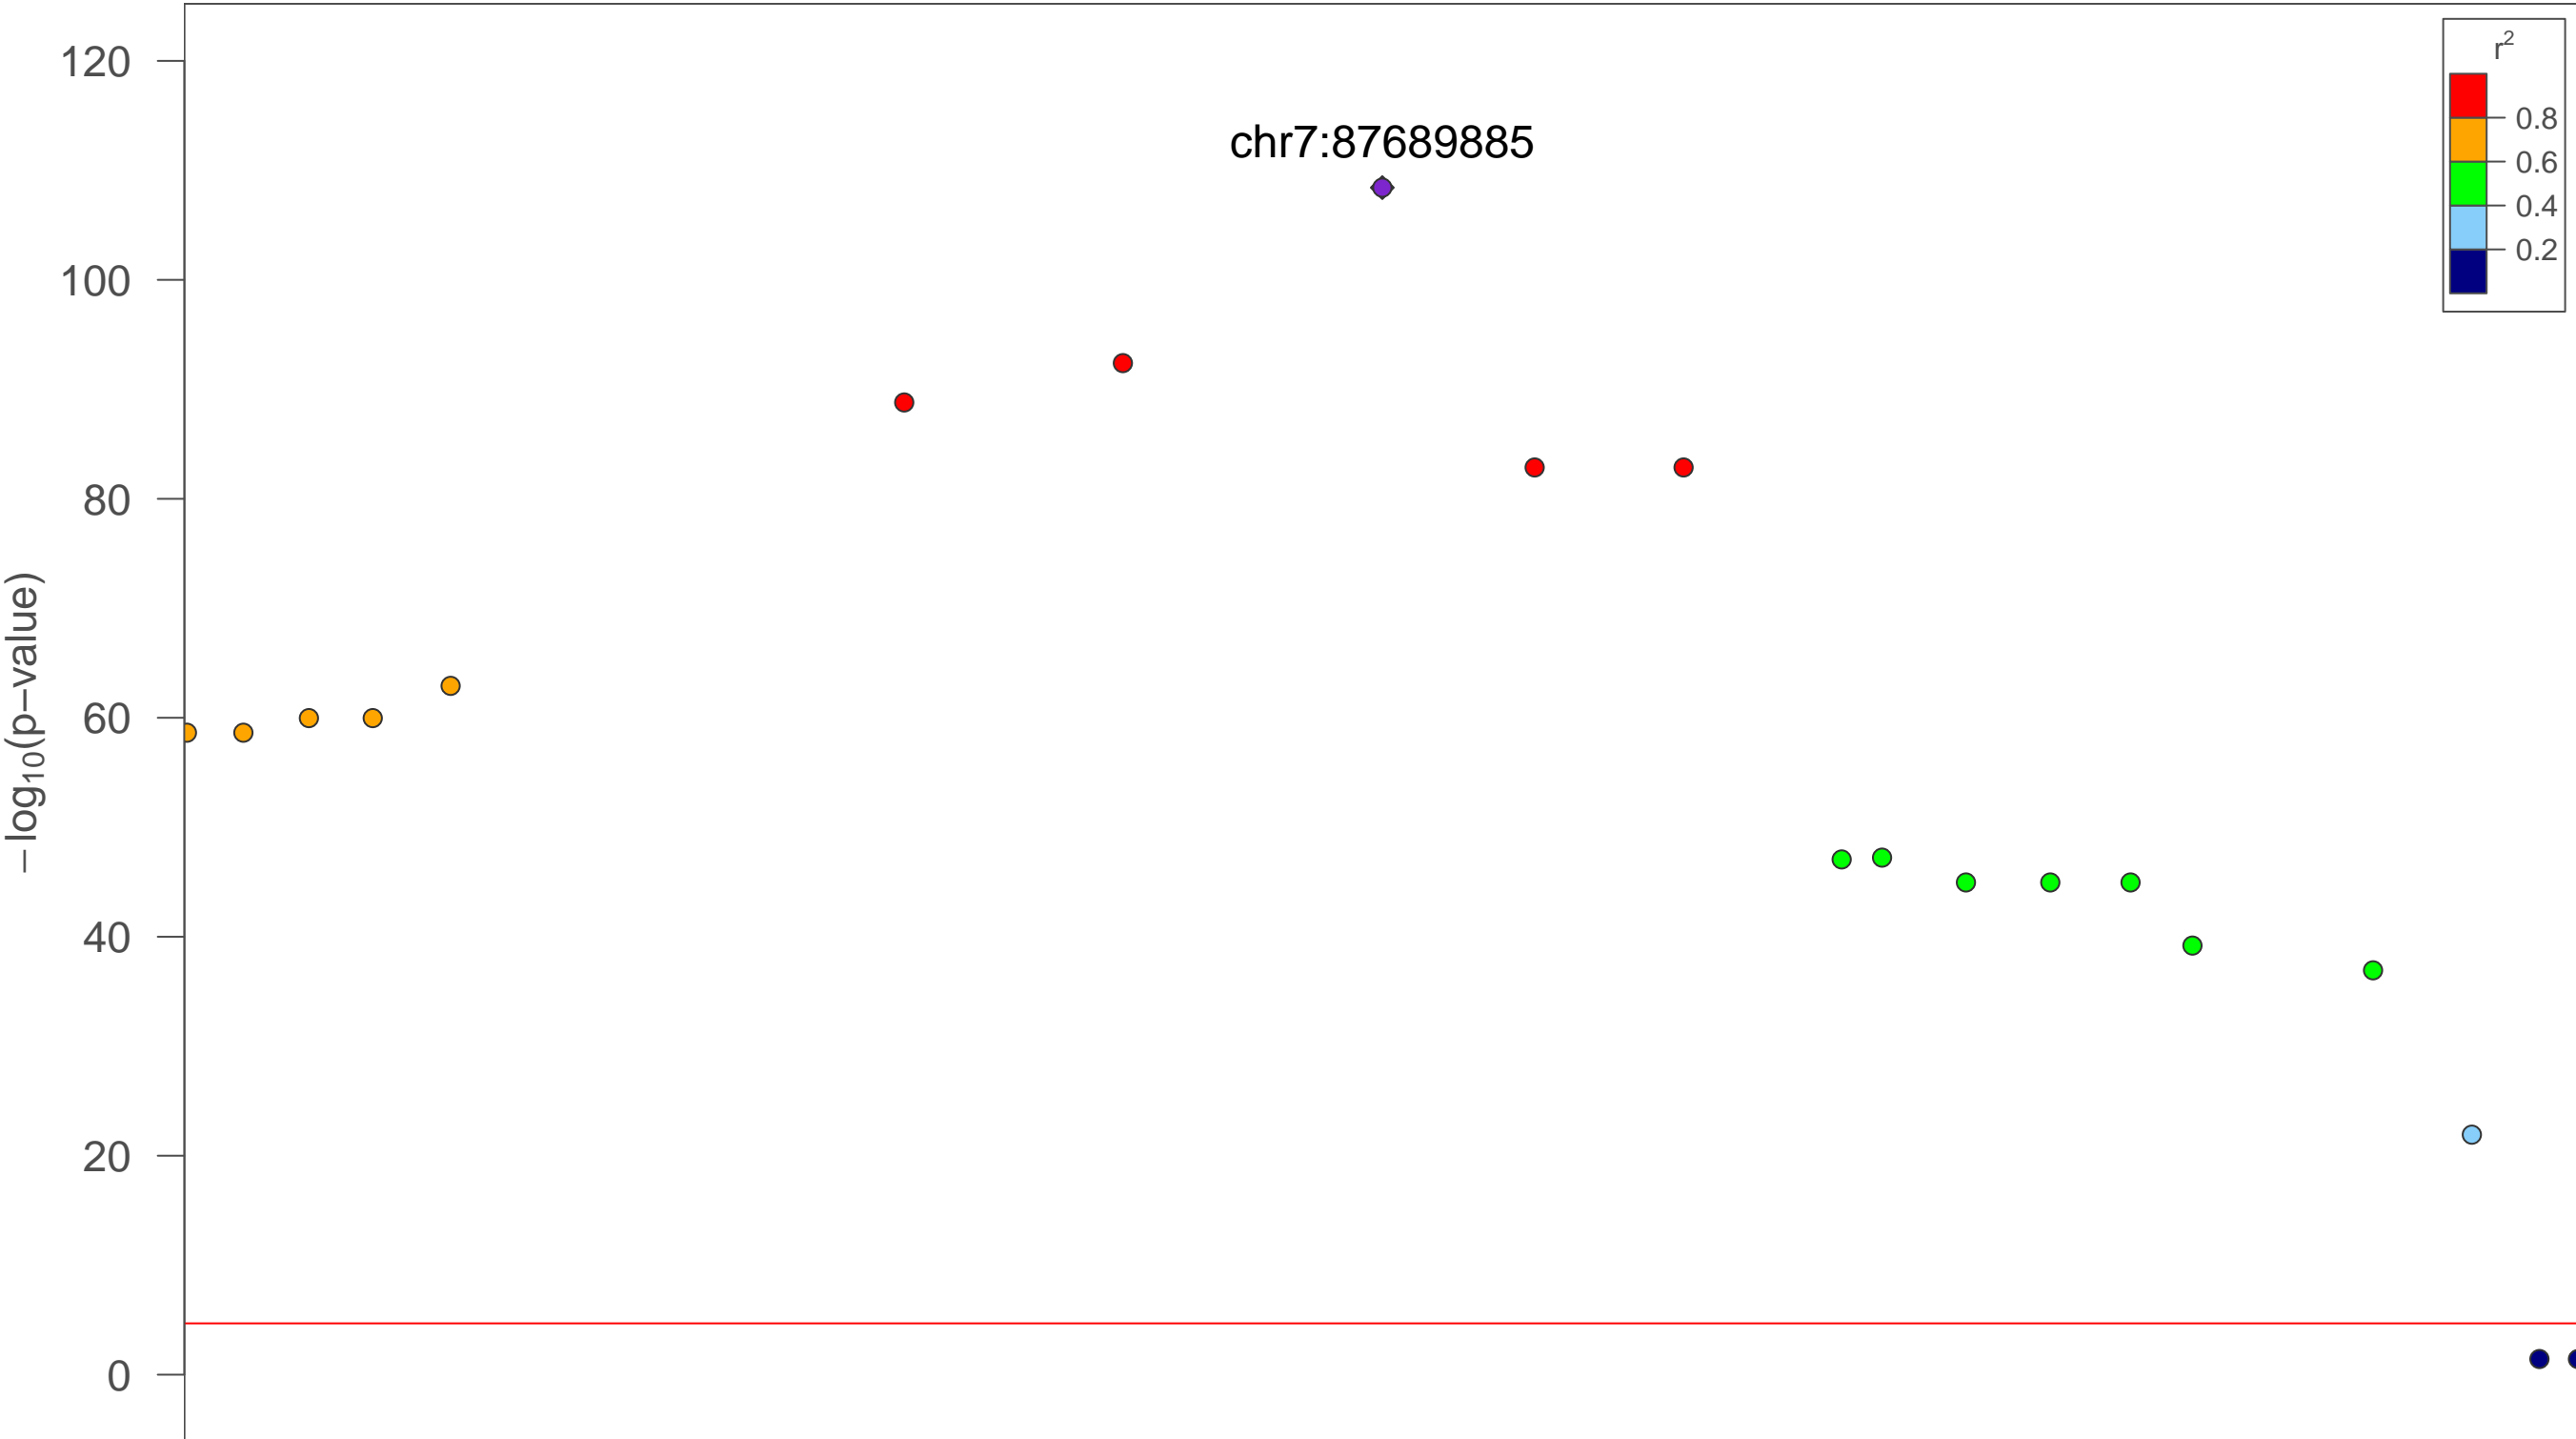

Credible Set

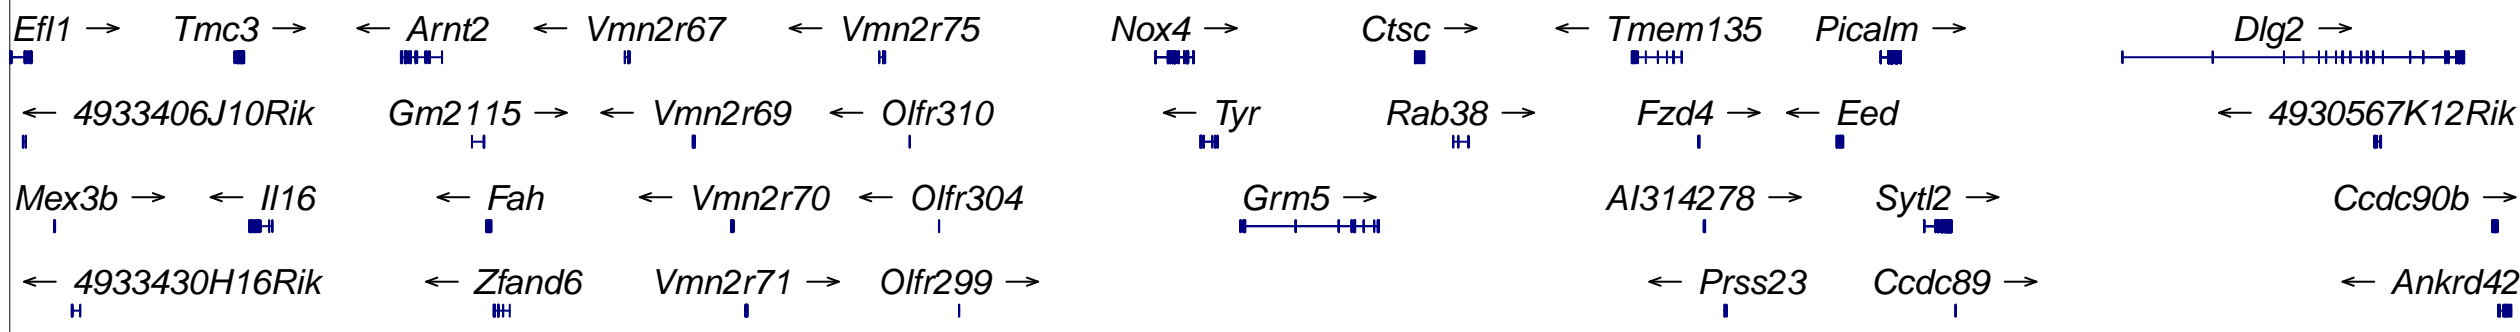

42 genes  
omitted

date: Thu Oct 25 16:53:09 2018  
build: F34Array  
display range: chr7:82689885–92689885 [82689885–92689885]  
hilite range: 0 – 0 [ 0 – 0 ]  
reference SNP: chr7:87689885  
number of SNPs plotted: 21  
min P-value: 3.76E–109 [chr7:87689885]  
max P-value: 3.73E–2 [chr7:92679853]  
omitted Genes: Stard5, Cfap161, Mesdc1  
omitted Genes: Mesdc2, Cemip, Abhd17c  
omitted Genes: 2610206C17Rik, Olfr291, Olfr290  
omitted Genes: Vmn2r65, Vmn2r66, Vmn2r68  
omitted Genes: Vmn2r72, Vmn2r73, Vmn2r74  
omitted Genes: Vmn2r76, Olfr309, Olfr308  
omitted Genes: Olfr307, Olfr305, Olfr303  
omitted Genes: Olfr301, Olfr298, Olfr297  
omitted Genes: Olfr295, Olfr294, Olfr293  
omitted Genes: Olfr292, Folh1, Vmn2r77  
omitted Genes: Vmn2r78, Vmn2r79, Me3  
omitted Genes: Ccdc81, l7Rn6, E230029C05Rik  
omitted Genes: 2310010J17Rik, Ccdc83, Crebzf  
omitted Genes: Tmem126a, Tmem126b, Pcf11

Fine-mapping Regions

| snp           | chr | pos (Mb) | pp | group        | color  |
|---------------|-----|----------|----|--------------|--------|
| chr7:87689885 | 7   | 87.68989 | 1  | Credible Set | purple |

F34 Array, coat color, agouti

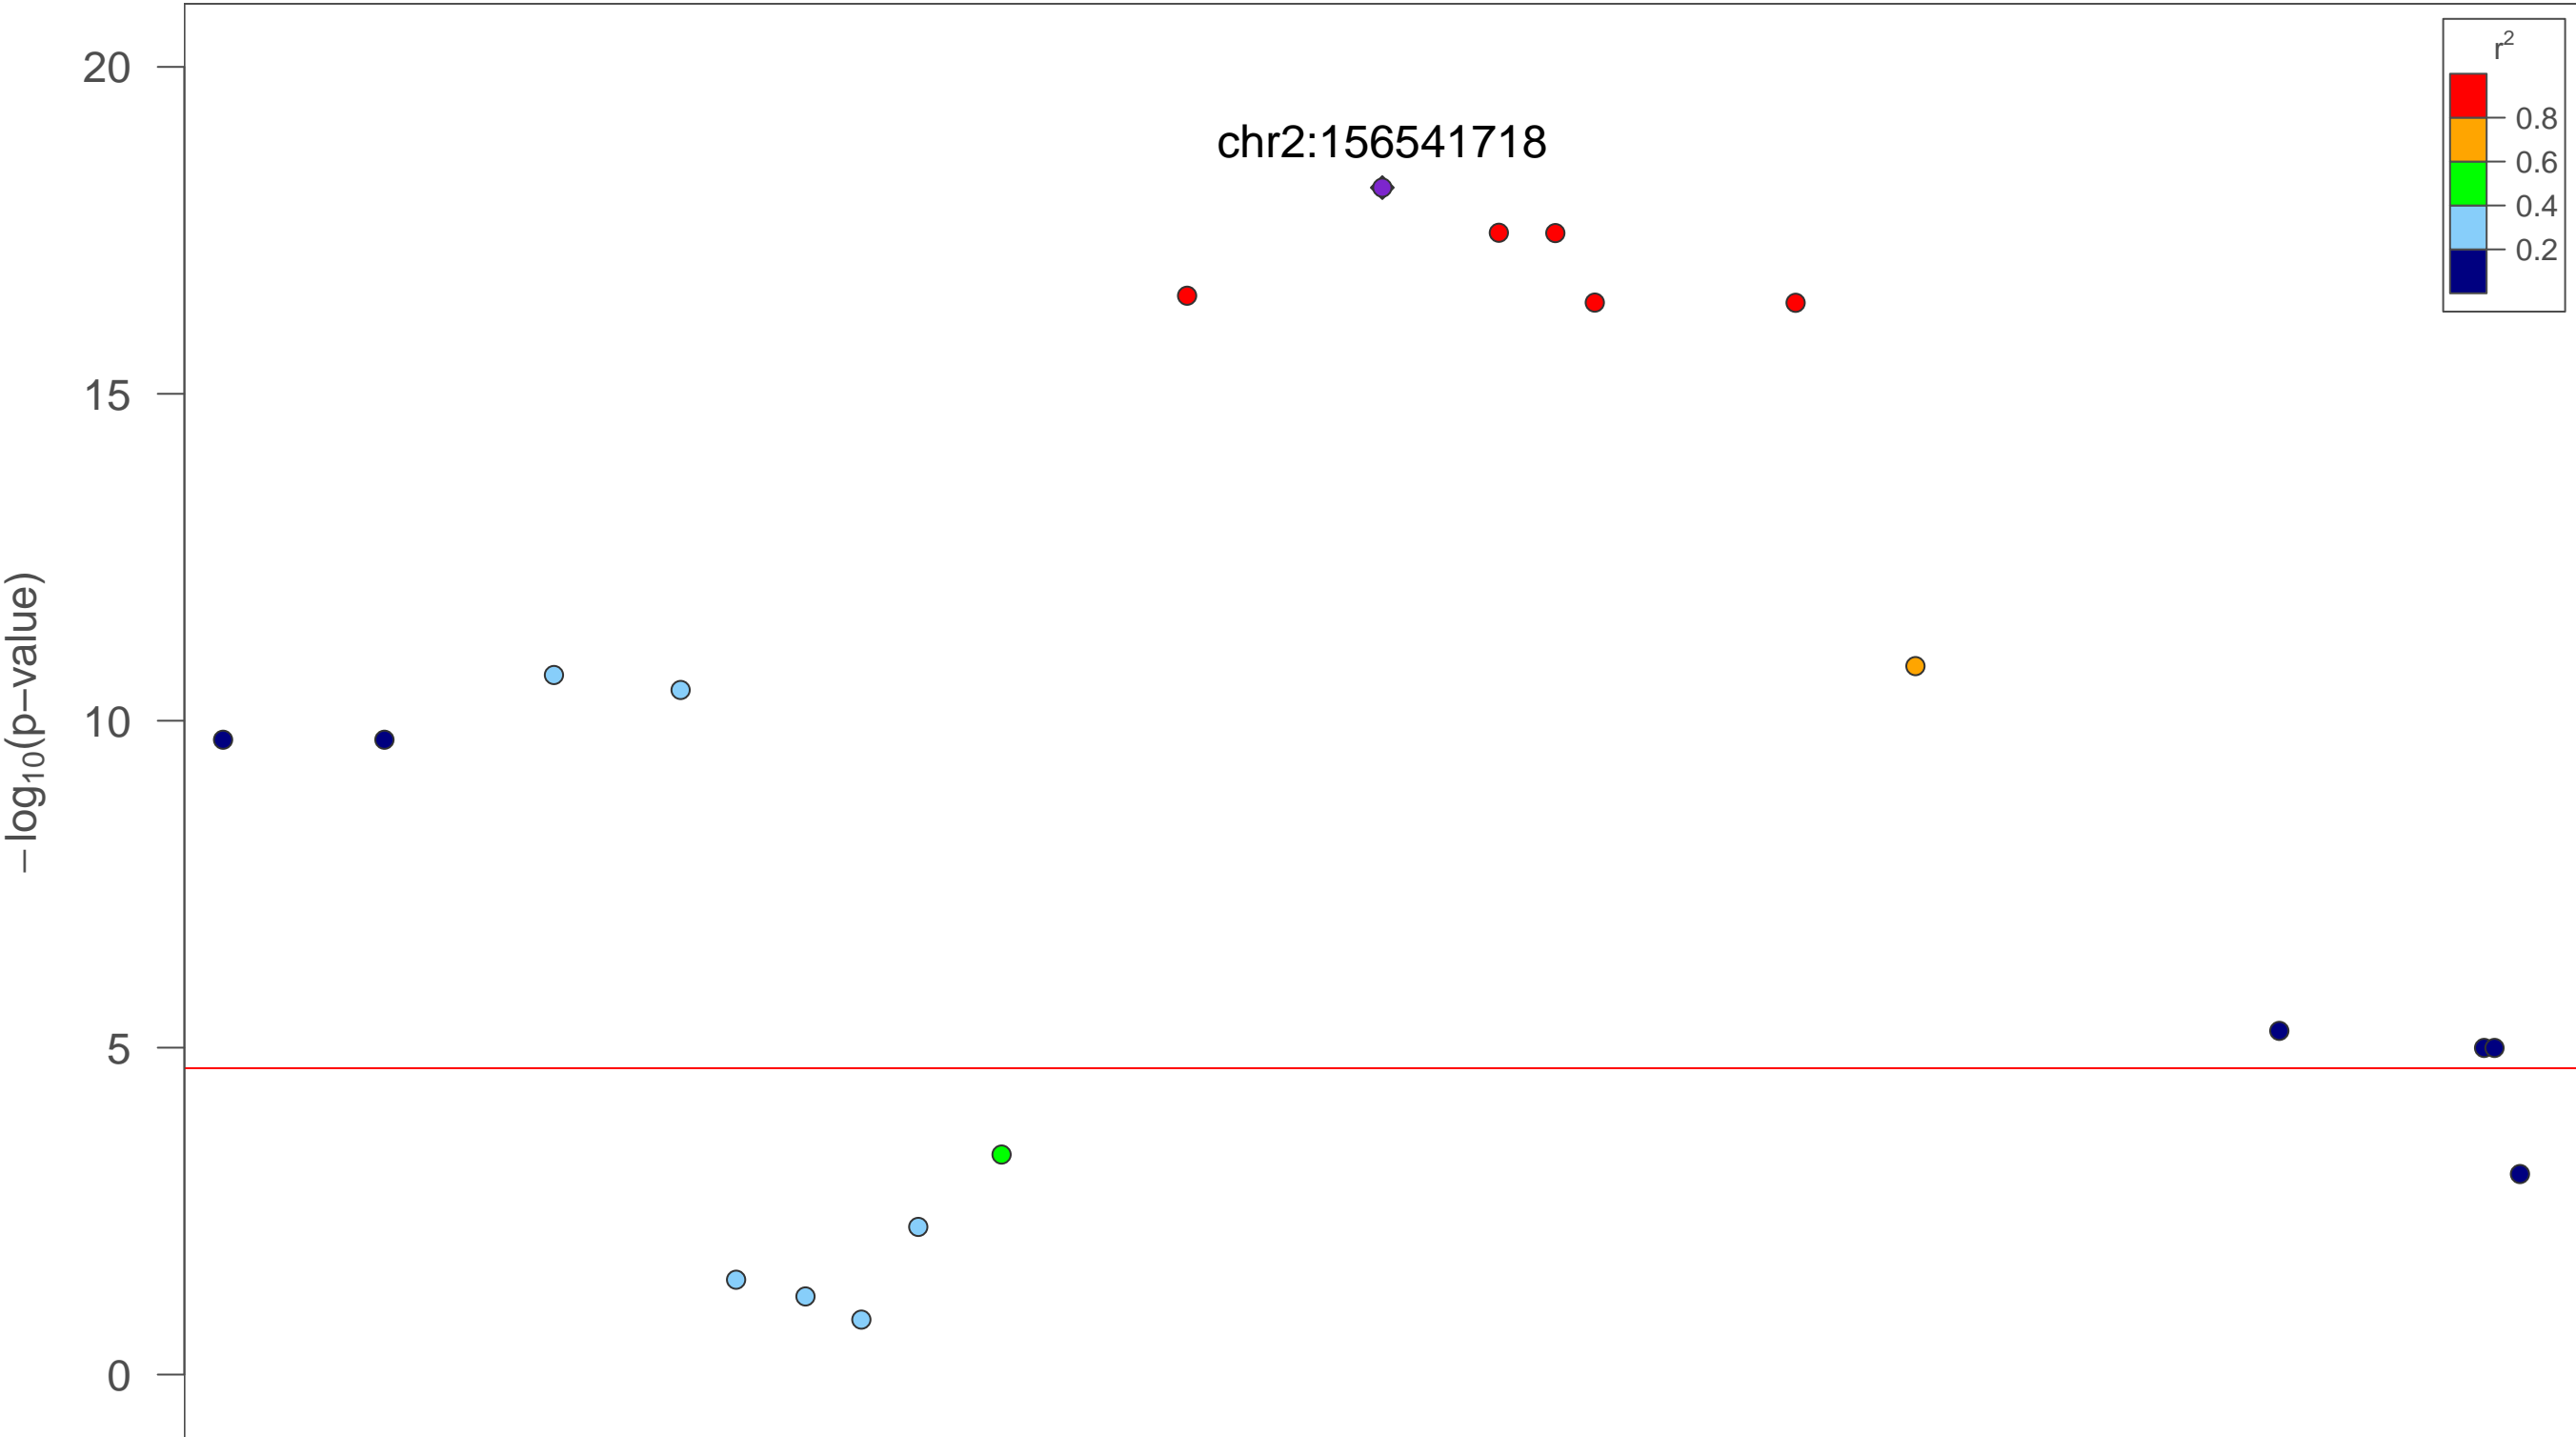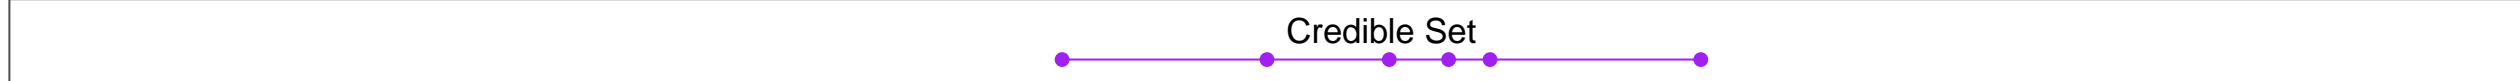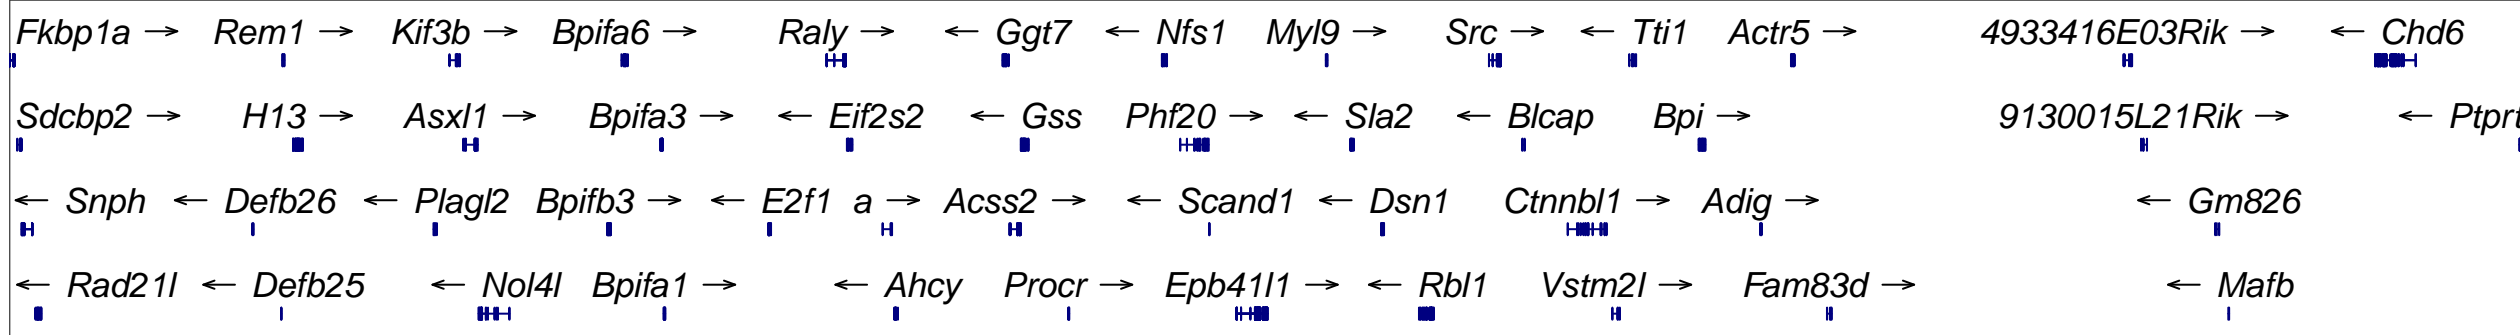

136 genes  
omitted

date: Thu Oct 25 16:53:19 2018

build: F34Array

display range: chr2:151541718–161541718 [151541718–161541718]

hilite range: 0 – 0 [ 0 – 0 ]

reference SNP: chr2:156541718

number of SNPs plotted: 21

min P-value: 7.02E–19 [chr2:156541718]

max P-value: 1.44E–1 [chr2:154367620]

omitted Genes: Tmem74b, Psmf1, Rspo4

omitted Genes: Angpt4, Mir1953, Fam110a

omitted Genes: Slc52a3, Scrt2, Srxn1

omitted Genes: Tcf15, Csnk2a1, Tbc1d20

omitted Genes: Rbck1, Trib3, Gm14164

omitted Genes: Nrsn2, Sox12, Zcchc3

omitted Genes: 6820408C15Rik, Defb23, Defb20

omitted Genes: Defb22, Defb28, Defb29

omitted Genes: Defb21, Defb19, Defb45

omitted Genes: Defb36, Mcts2, Id1

omitted Genes: Cox4i2, Bcl2l1, Tpx2

omitted Genes: Mir5622, Mylk2, Foxs1

omitted Genes: Dusp15, Ttl9, Pdrg1

omitted Genes: Xkr7, Ccm2l, Hck

omitted Genes: Tm9sf4, Tspyl3, Pofut1

omitted Genes: 2500004C02Rik, Commd7, Dnmt3b

omitted Genes: Mapre1, Efcab8, Sun5

omitted Genes: Bpifb2, Bpifb6, Bpifb4

omitted Genes: Bpifa2, Bpifa5, Bpifb1

omitted Genes: Bpifb5, Bpifb9a, Bpifb9b

omitted Genes: Cdk5rap1, Snta1, Cbfa2t2

omitted Genes: Necab3, 1700003F12Rik, Actl10

omitted Genes: Pxmp4, Zfp341, Chmp4b

omitted Genes: 2310005A03Rik, Itch, Dynlrb1

omitted Genes: Map1lc3a, Pigu, Mir695

omitted Genes: Trp53inp2, Ncoa6, Acss2os

omitted Genes: Myh7b, Mir499, Trpc4ap

omitted Genes: Edem2, Mmp24, BC029722

omitted Genes: Eif6, Fam83c, Uqcc1

omitted Genes: Gdf5, Cep250, 6430550D23Rik

omitted Genes: Ergic3, Fer1l4, Spag4

omitted Genes: Cnna1, Rbm12, Rame1

Make more plots at <http://csg.sph.umich.edu/locuszoom/>

Fine-mapping Regions

| snp            | chr | pos (Mb) | pp         | group        | color  |
|----------------|-----|----------|------------|--------------|--------|
| chr2:155727021 | 2   | 155.7270 | 0.01582778 | Credible Set | purple |
| chr2:156541718 | 2   | 156.5417 | 0.67845350 | Credible Set | purple |
| chr2:157028101 | 2   | 157.0281 | 0.14122750 | Credible Set | purple |
| chr2:157263817 | 2   | 157.2638 | 0.13963072 | Credible Set | purple |
| chr2:157428508 | 2   | 157.4285 | 0.01247776 | Credible Set | purple |
| chr2:158266555 | 2   | 158.2666 | 0.01238273 | Credible Set | purple |



F34 Array, open field, distance travelled in periphery (cm)

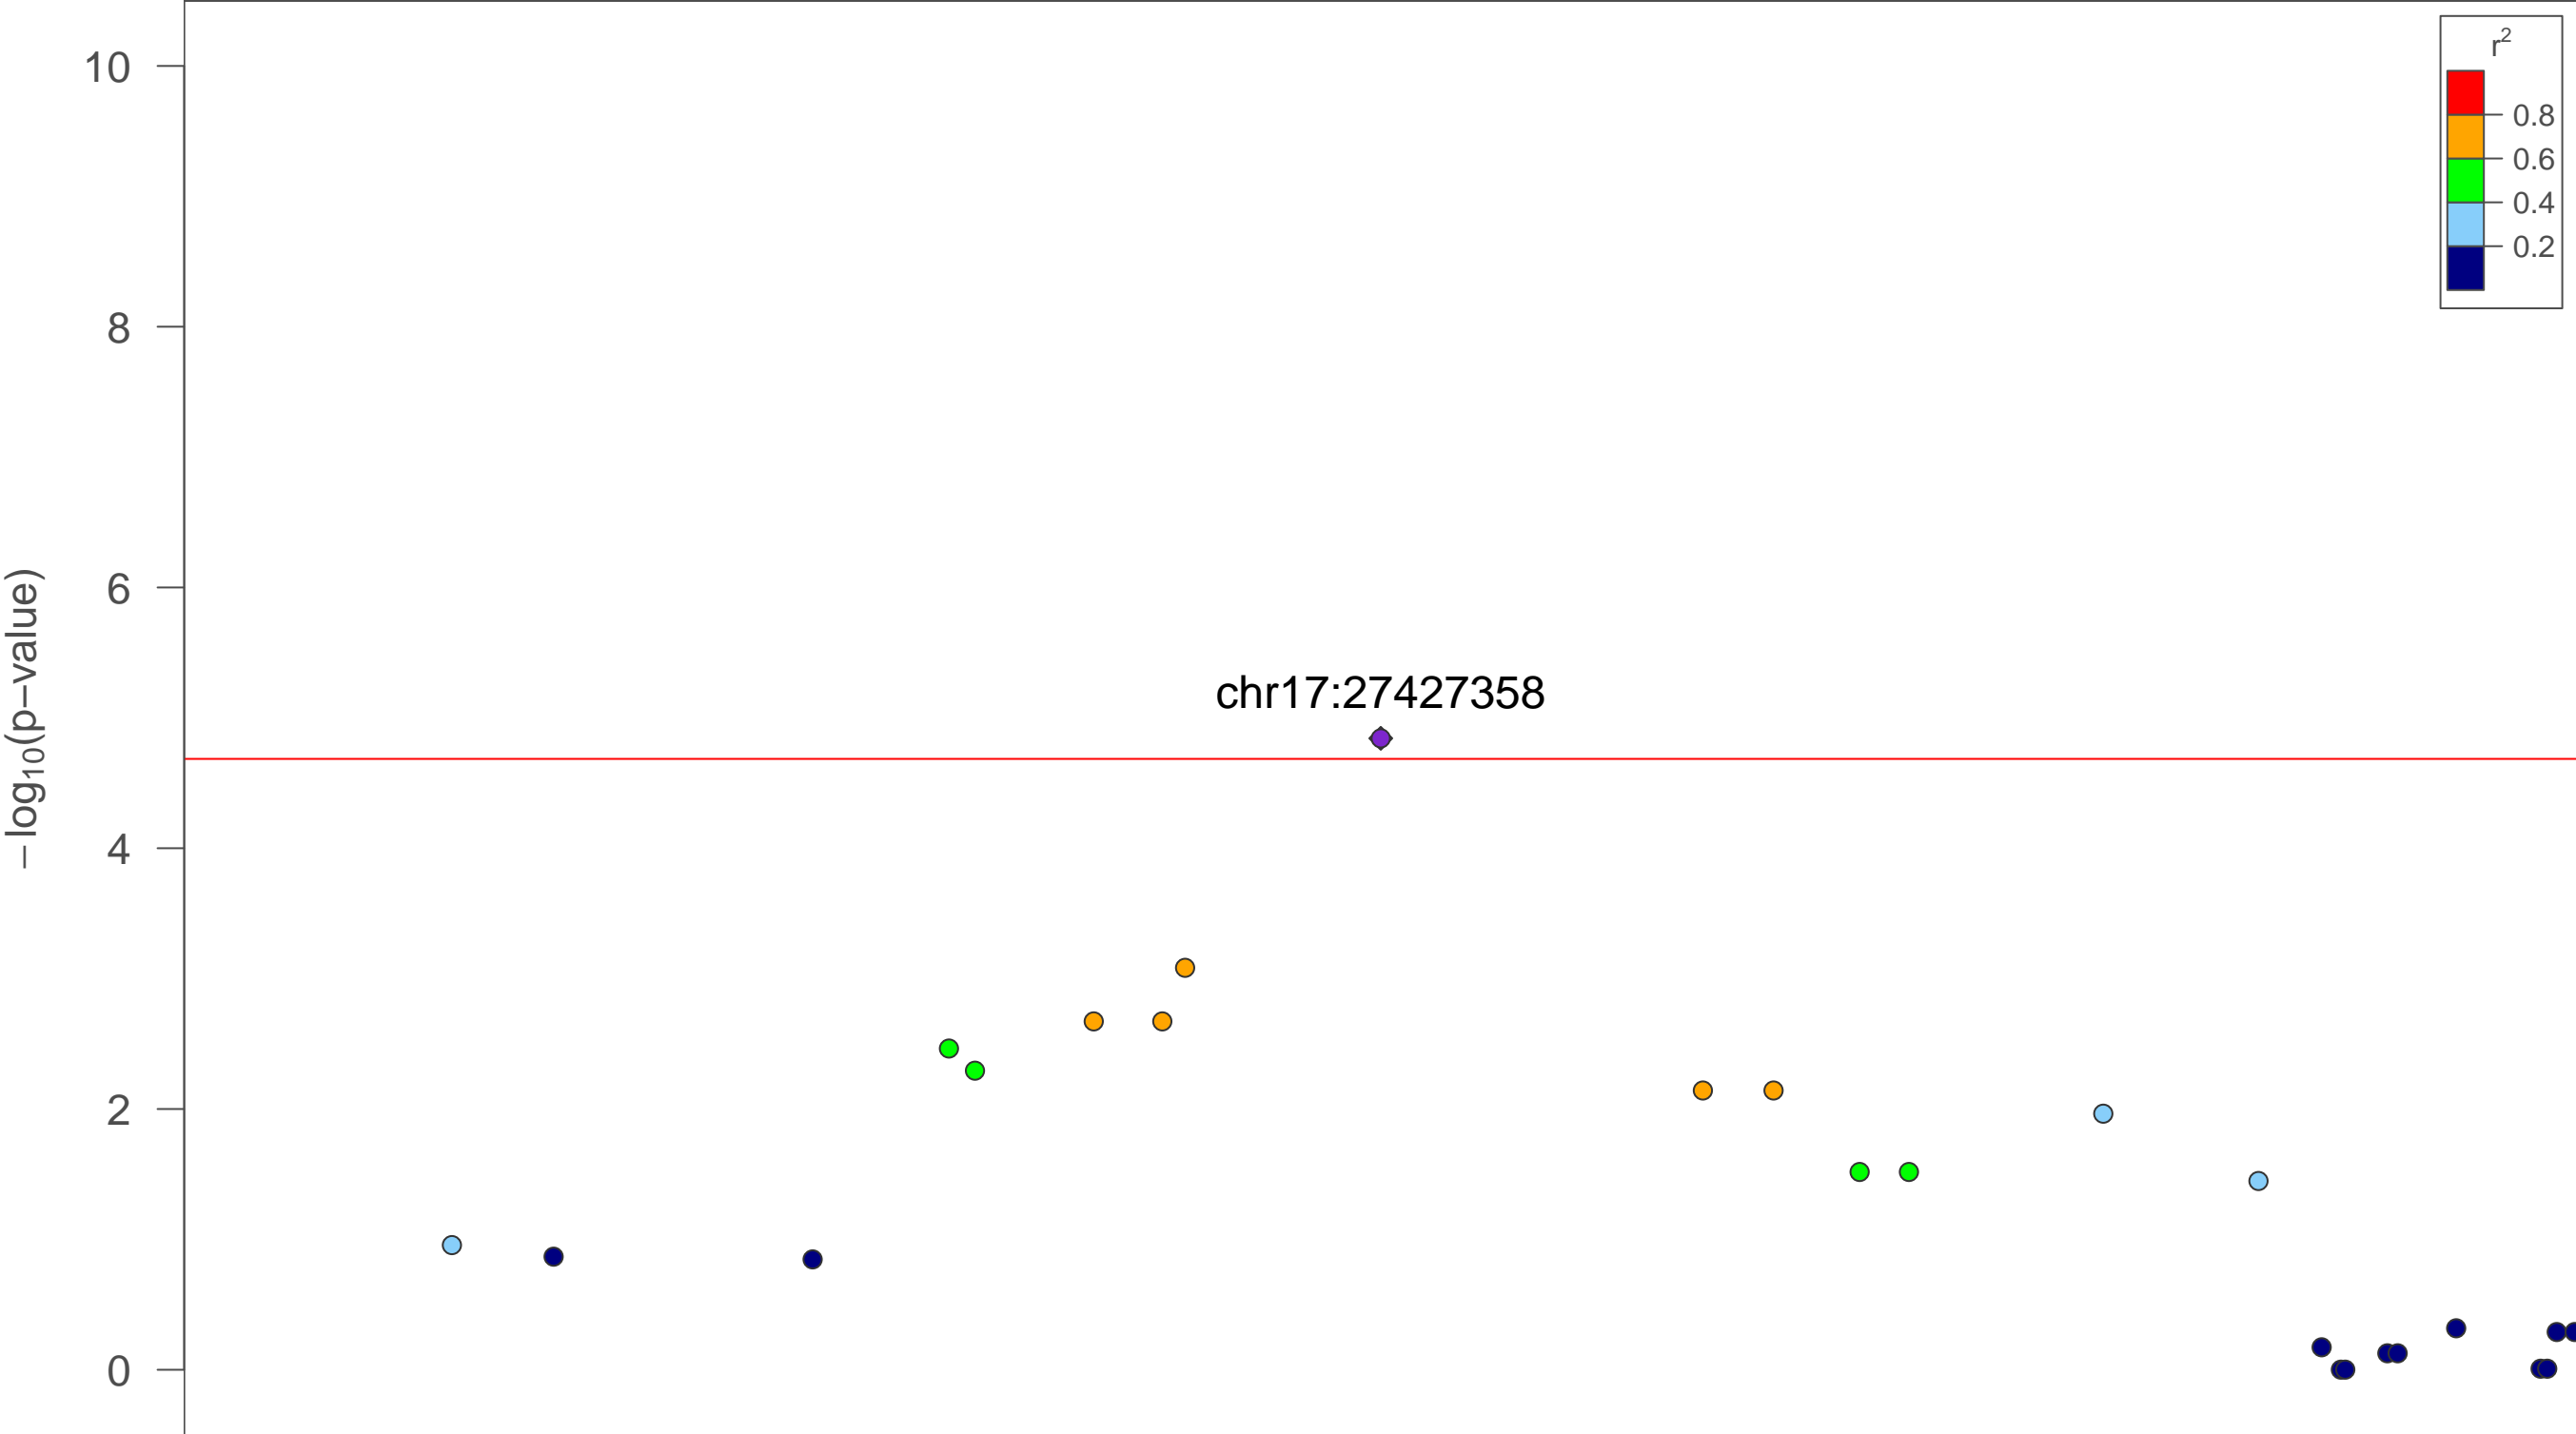

Credible Set

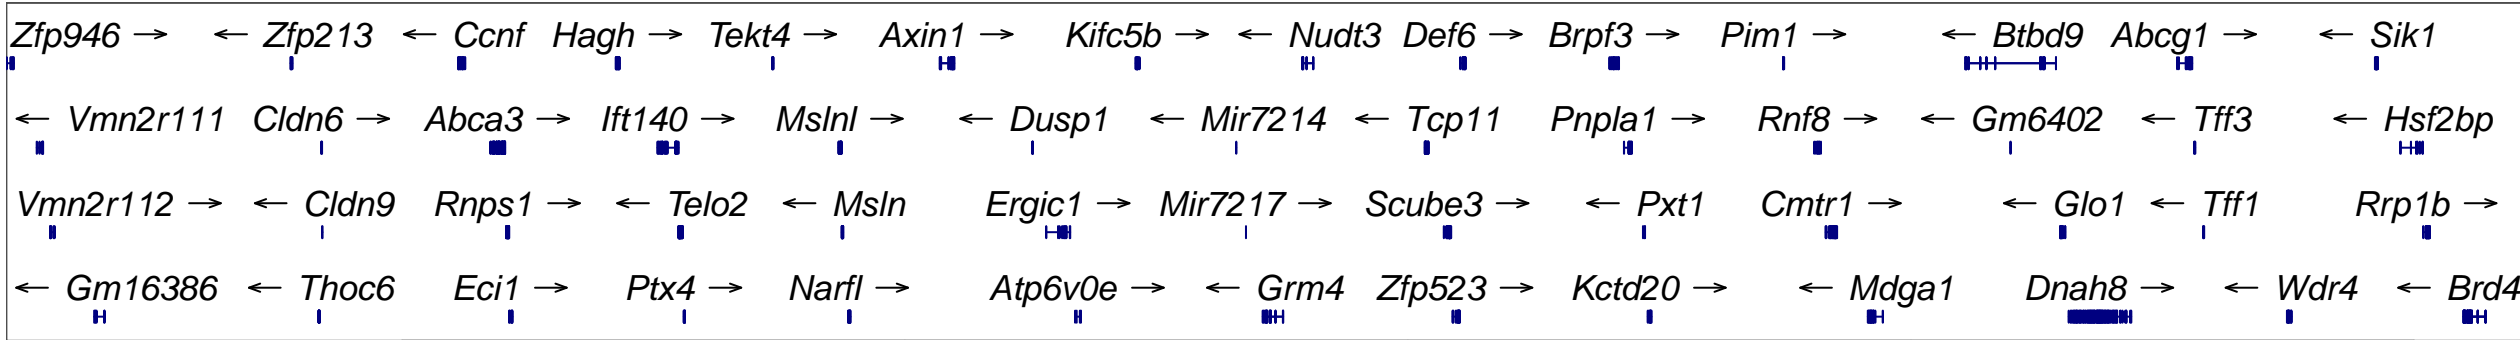

234 genes  
omitted

date: Thu Oct 25 16:53:43 2018

build: F34Array

display range: chr17:22427358–32427358 [22427358–32427358]

hilite range: 0 – 0 [ 0 – 0 ]

reference SNP: chr17:27427358

number of SNPs plotted: 26

min P-value: 1.44E–5 [chr17:27427358]

max P-value: 9.97E–1 [chr17:31438721]

omitted Genes: Zfp945, Vmn2r113, Vmn2r-ps129

omitted Genes: Zfp40, Vmn2r114, Vmn2r115

omitted Genes: Vmn2r116, Vmn2r117, 6330415G19Rik

omitted Genes: Zfp13, Zscan10, Mmp25

omitted Genes: Ccdc64b, Hcfc1r1, Tnfrsf12a

omitted Genes: Pkmyt1, Paqr4, Kremen2

omitted Genes: 9530082P21Rik, Flywch1, Flywch2

omitted Genes: Srrm2, Mir5125, Tceb2

omitted Genes: Prss33, Prss41, Prss32

omitted Genes: Prss21, Dcpp1, Dcpp2

omitted Genes: Dcpp3, Sbp, Sbpl

omitted Genes: Prss30, Prss22, Prss27

omitted Genes: Kctd5, Pdpk1, Amdhd2

omitted Genes: Atp6v0c, Tbc1d24, Ntn3

omitted Genes: 1600002H07Rik, Mir5134, Mir6965

omitted Genes: Abca17, D330041H03Rik, Dnase1l2

omitted Genes: E4f1, Pgp, Mlst8

omitted Genes: Bricd5, Caskin1, Traf7

omitted Genes: Rab26os, Rab26, Pkd1

omitted Genes: Tsc2, Nthl1, Slc9a3r2

omitted Genes: Npw, Zfp598, Syngn3

omitted Genes: Gfer, Noxo1, Tbl3

omitted Genes: Rnf151, Snhg9, Snora78

omitted Genes: Rps2, Snora64, Ndubf10

omitted Genes: Rpl3l, Msrb1, Hs3st6

omitted Genes: Meib, Fahd1, Igfbp3

omitted Genes: Nubp2, Spsb3, Eme2

omitted Genes: Mrps34, Nme3, Mapk8ip3

omitted Genes: Hn1l, Cramp1l, Tmem204

omitted Genes: Clcn7, Ccdc154, BC003965

omitted Genes: Unkl, Gnptg, Tnfrsf12a

omitted Genes: Baicp3, Mir3517, Ube2i

Make more plots at <http://csg.sph.umich.edu/locuszoom/>

Fine-mapping Regions

| snp            | chr | pos (Mb) | pp | group        | color  |
|----------------|-----|----------|----|--------------|--------|
| chr17:27427358 | 17  | 27.42736 | 1  | Credible Set | purple |

# F34 Array, tibia length (cm)

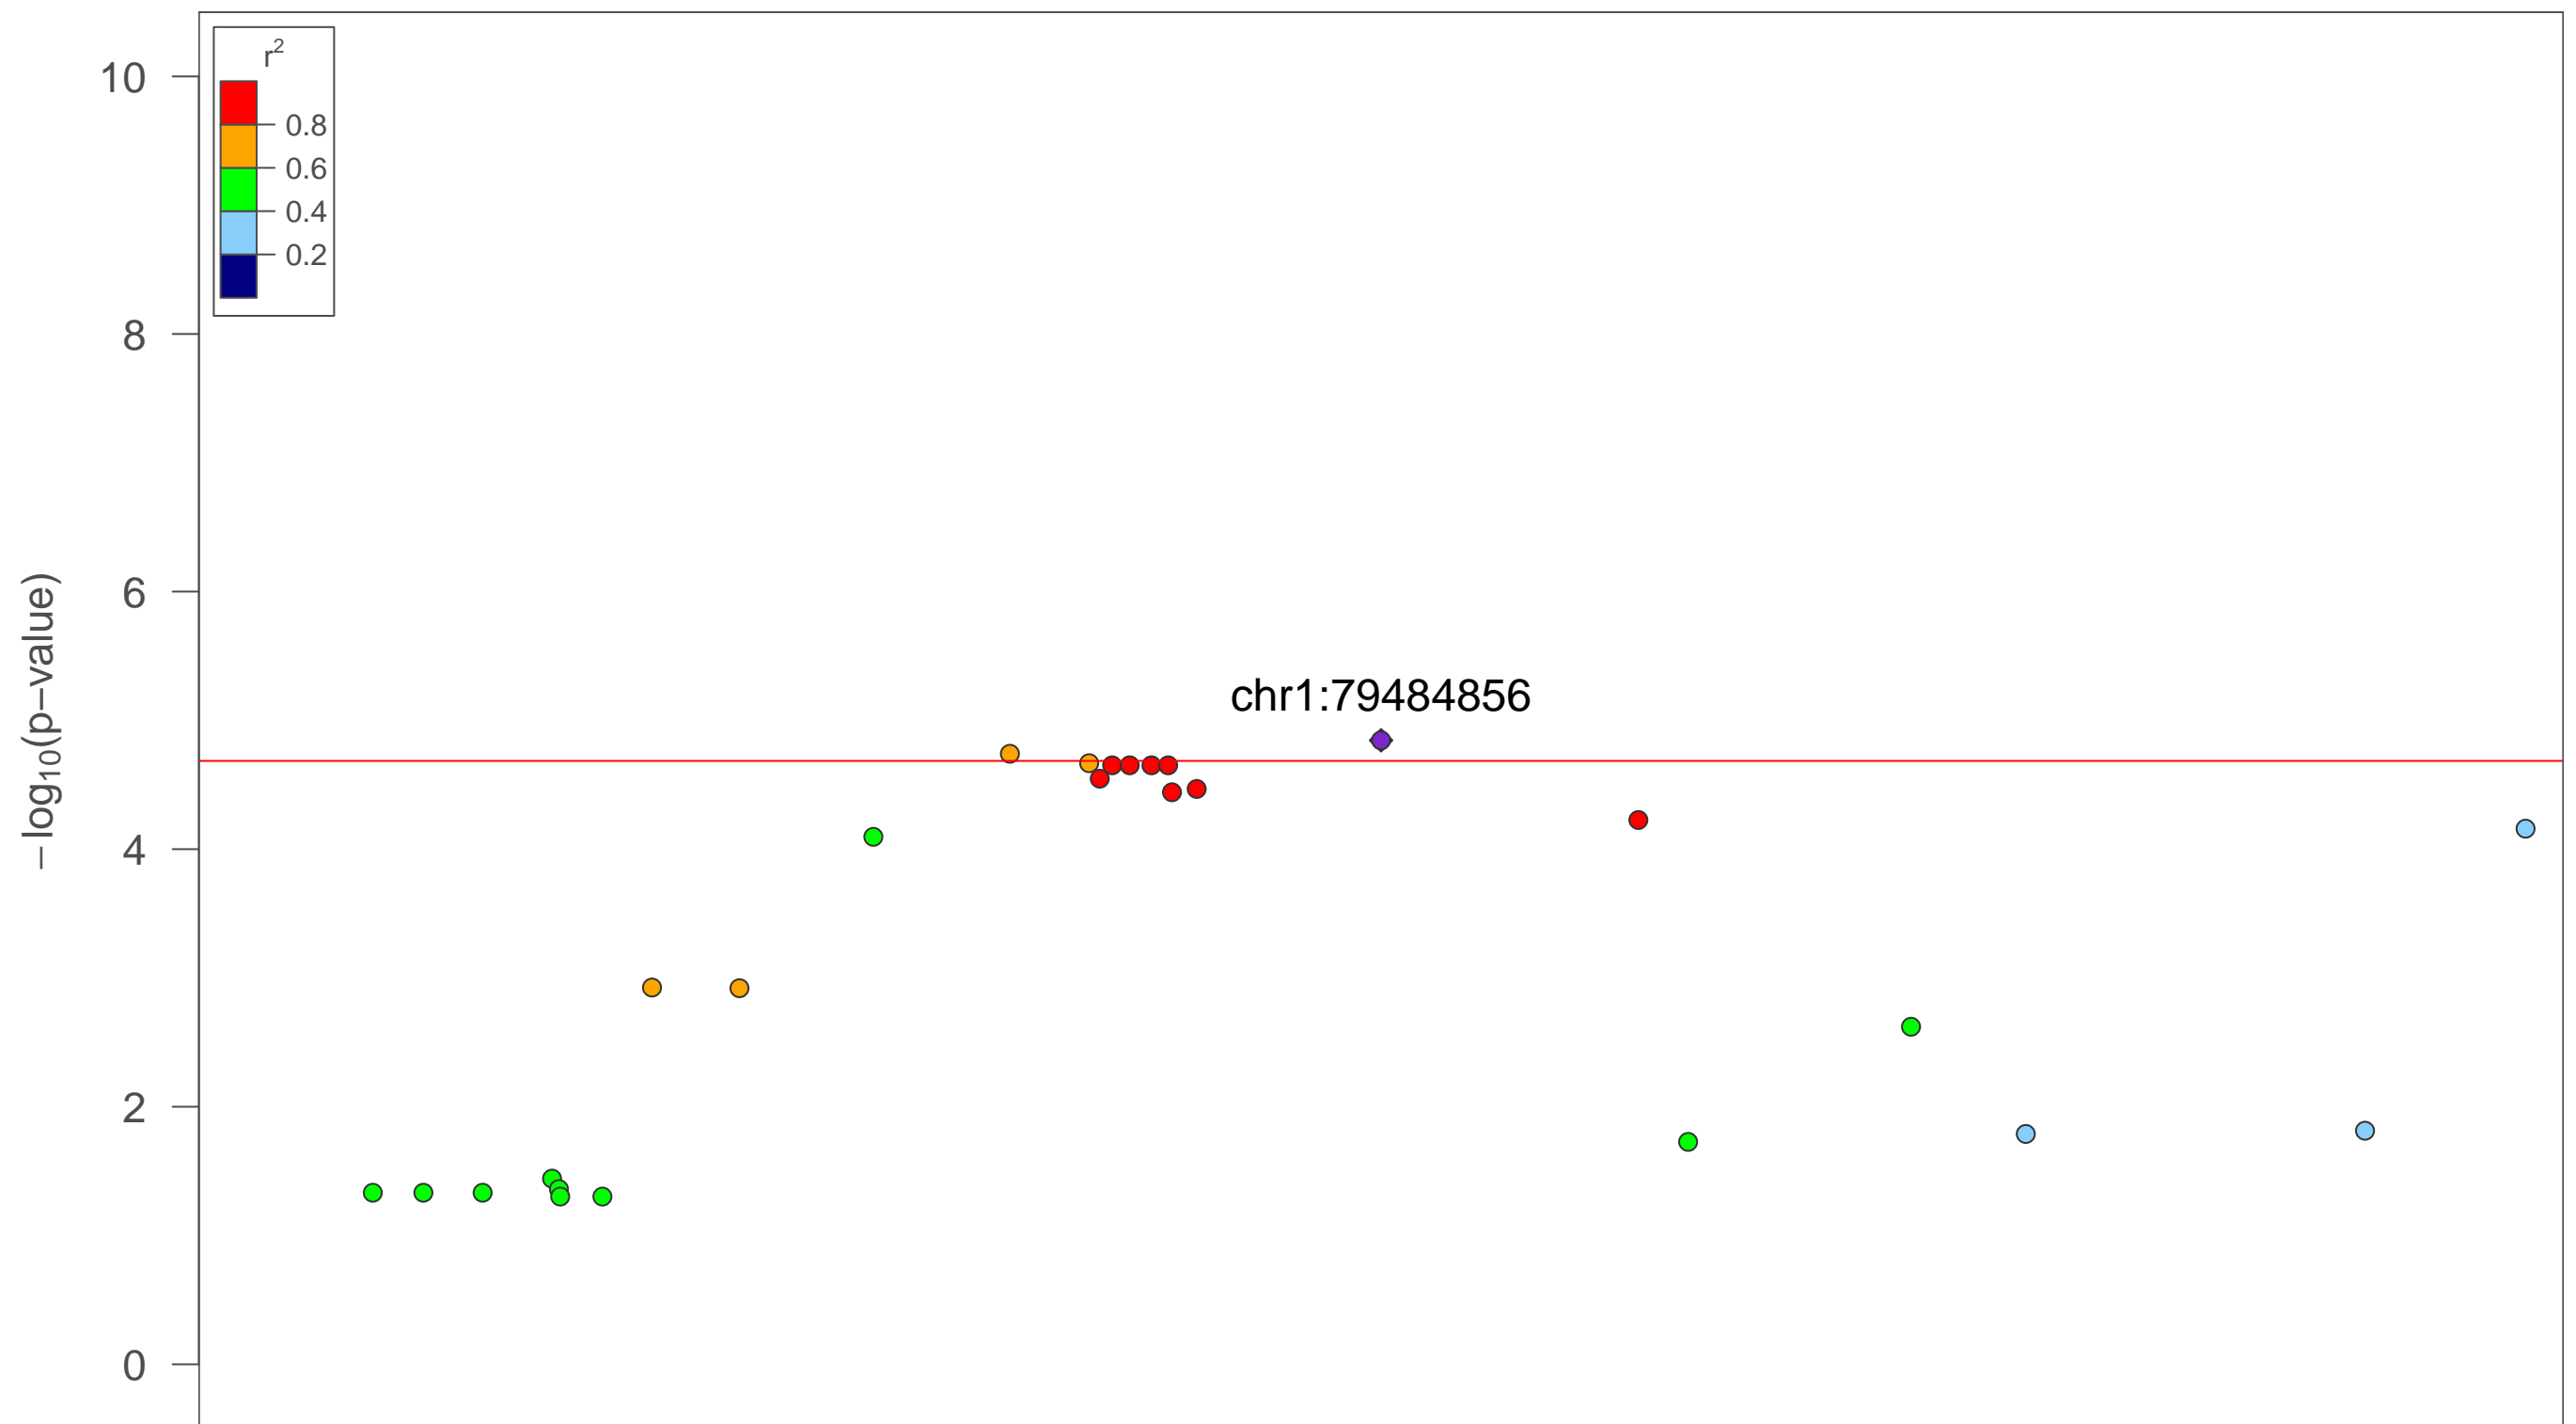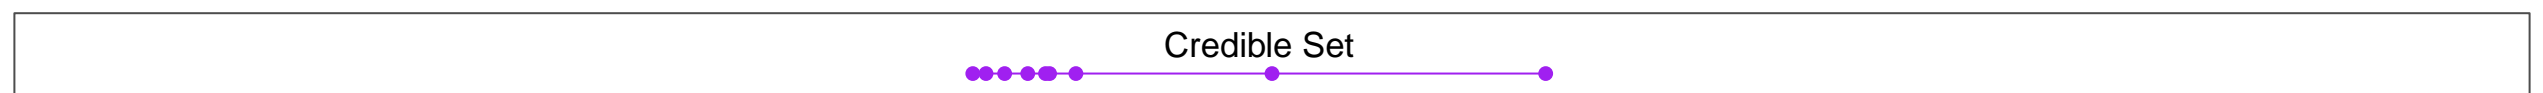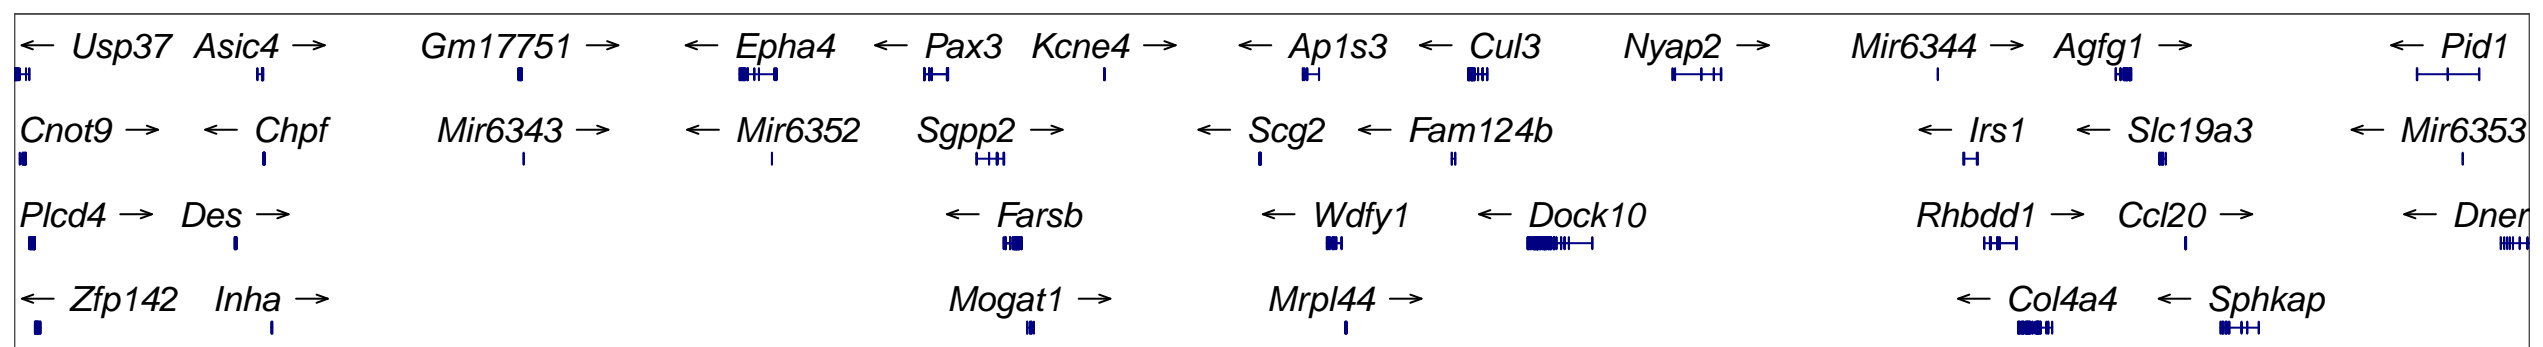

46 genes  
omitted

76

78

80

82

84

Position on chr1 (Mb)

date: Thu Oct 25 16:53:49 2018  
build: F34Array  
display range: chr1:74484856–84484856 [74484856–84484856]  
hilite range: 0 – 0 [ 0 – 0 ]  
reference SNP: chr1:79484856  
number of SNPs plotted: 27  
min P-value: 1.43E–5 [chr1:79484856]  
max P-value: 4.98E–2 [chr1:76013512]  
omitted Genes: Bcs1l, Rnf25, Stk36  
omitted Genes: Tll4, Cyp27a1, Prkag3  
omitted Genes: Wnt6, Wnt10a, Cdk5r2  
omitted Genes: Fev, Cryba2, Mir375  
omitted Genes: Ccdc108, Ihh, Nhej1  
omitted Genes: Slc23a3, Cnppd1, Fam134a  
omitted Genes: Zfand2b, Abcb6, Atg9a  
omitted Genes: Ankzf1, Glb1l, Stk16  
omitted Genes: Tuba4a, A630095N17Rik, Dnajb2  
omitted Genes: Ptpn, Resp18, Dnpep  
omitted Genes: Gm15179, Speg, Gmppa  
omitted Genes: Tmem198, Obsl1, Stk11ip  
omitted Genes: Slc4a3, Utp14b, Acsl3  
omitted Genes: Serpine2, 1700016L21Rik, Col4a3  
omitted Genes: Mff, Tm4sf20, Krtap28–13  
omitted Genes: Daw1

Fine-mapping Regions

| snp           | chr | pos (Mb) | pp         | group        | color  |
|---------------|-----|----------|------------|--------------|--------|
| chr1:78295279 | 1   | 78.29528 | 0.09930320 | Credible Set | purple |
| chr1:78347824 | 1   | 78.34782 | 0.12464403 | Credible Set | purple |
| chr1:78421886 | 1   | 78.42189 | 0.12464403 | Credible Set | purple |
| chr1:78513810 | 1   | 78.51381 | 0.12464403 | Credible Set | purple |
| chr1:78584391 | 1   | 78.58439 | 0.12464403 | Credible Set | purple |
| chr1:78600600 | 1   | 78.60060 | 0.07883549 | Credible Set | purple |
| chr1:78705181 | 1   | 78.70518 | 0.08339751 | Credible Set | purple |
| chr1:79484856 | 1   | 79.48486 | 0.19063059 | Credible Set | purple |
| chr1:80573002 | 1   | 80.57300 | 0.04925710 | Credible Set | purple |

F34 Array, heart\_tibia.gs\_wt

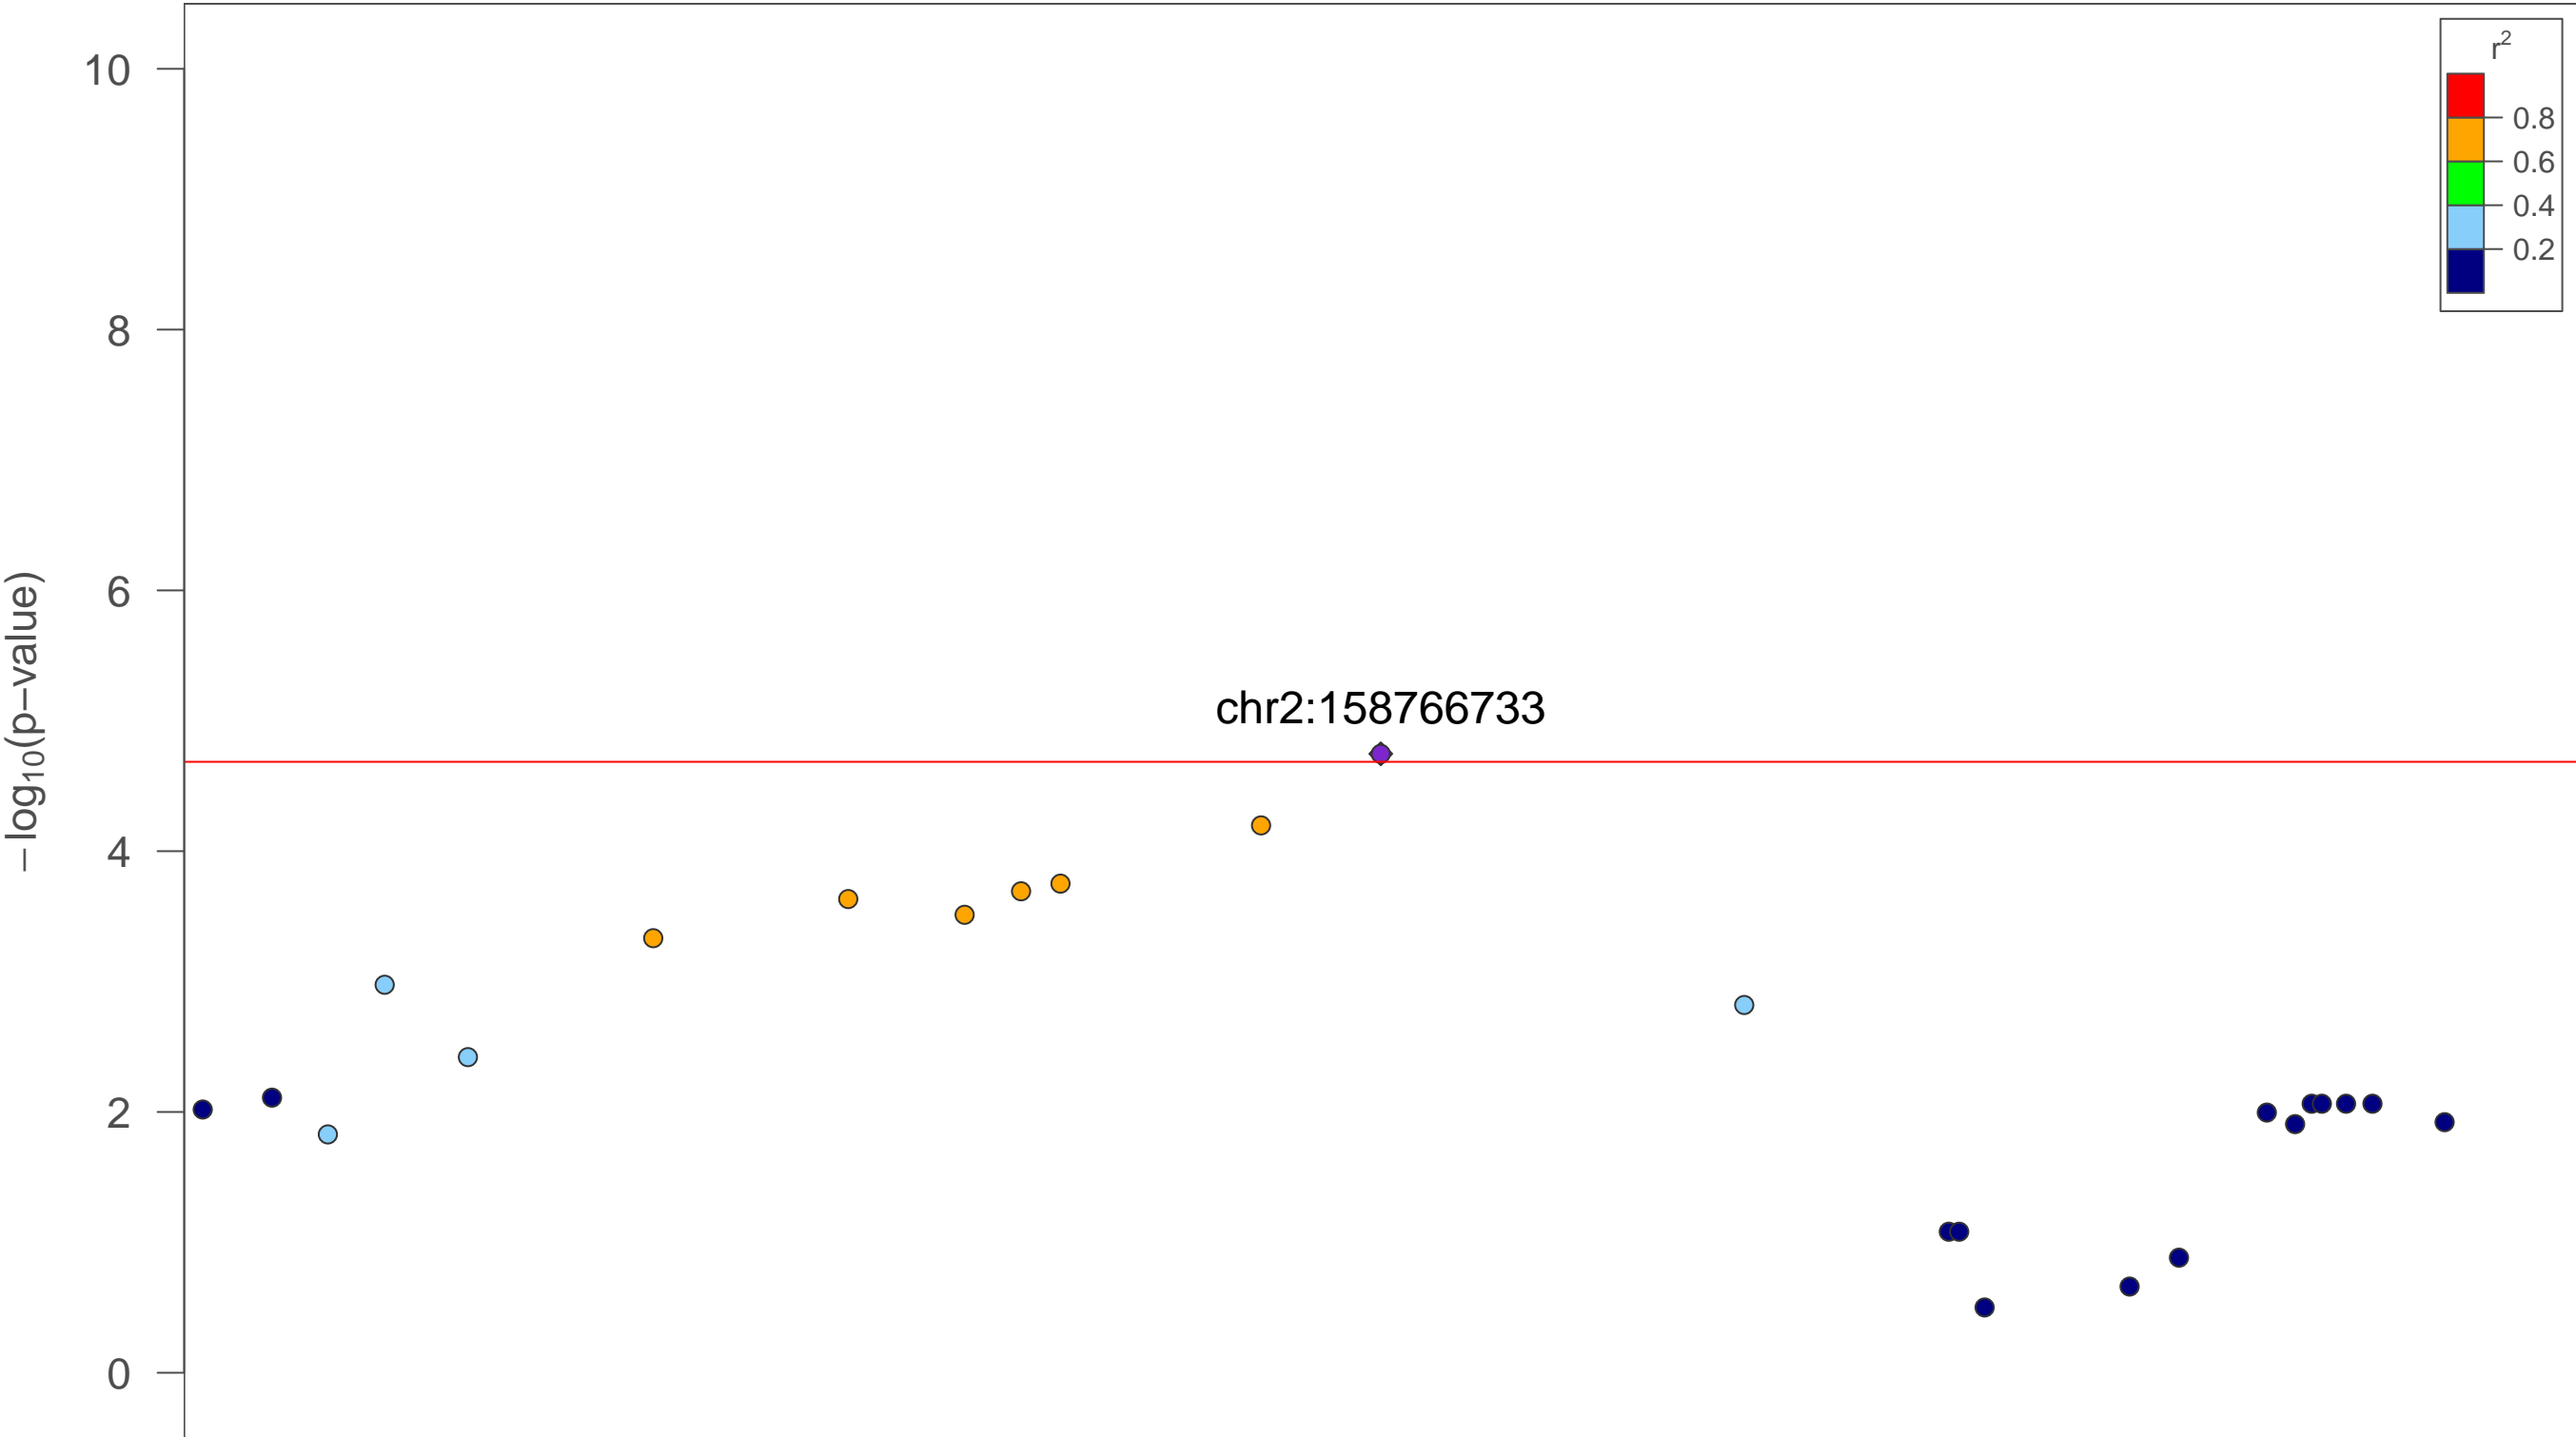

Credible Set

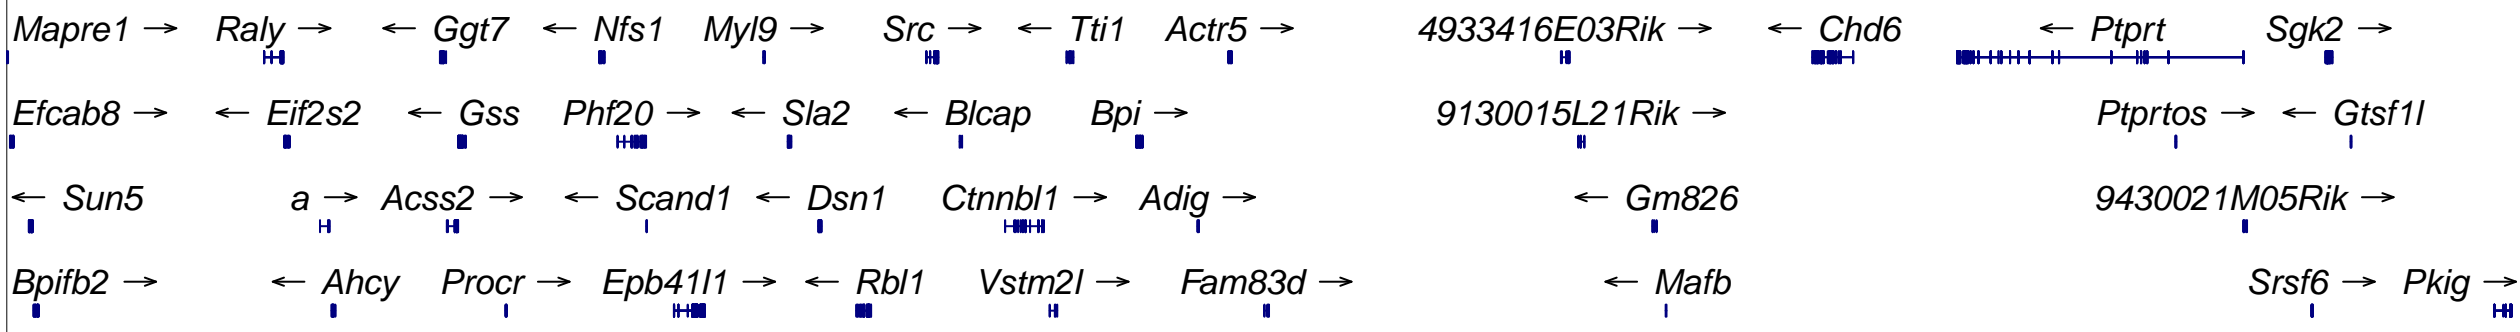

106 genes  
omitted

date: Thu Oct 25 16:53:57 2018

build: F34Array

display range: chr2:153766733–163766733 [153766733–163766733]

hilite range: 0 – 0 [ 0 – 0 ]

reference SNP: chr2:158766733

number of SNPs plotted: 26

min P-value: 1.79E–5 [chr2:158766733]

max P-value: 3.15E–1 [chr2:161289622]

omitted Genes: Bpifb6, Bpifb3, Bpifb4

omitted Genes: Bpifa6, Bpifa2, Bpifa3

omitted Genes: Bpifa1, Bpifa5, Bpifb1

omitted Genes: Bpifb5, Bpifb9a, Bpifb9b

omitted Genes: Cdk5rap1, Snta1, Cbfa2t2

omitted Genes: Necab3, 1700003F12Rik, Actl10

omitted Genes: E2f1, Pxmp4, Zfp341

omitted Genes: Chmp4b, 2310005A03Rik, Itch

omitted Genes: Dynlrb1, Map1lc3a, Pigu

omitted Genes: Mir695, Trp53inp2, Ncoa6

omitted Genes: Acss2os, Myh7b, Mir499

omitted Genes: Trpc4ap, Edem2, Mmp24

omitted Genes: BC029722, Eif6, Fam83c

omitted Genes: Uqcc1, Gdf5, Cep250

omitted Genes: 6430550D23Rik, Ergic3, Fer1l4

omitted Genes: Spag4, Cpne1, Rbm12

omitted Genes: Romo1, Rbm39, Cnbd2

omitted Genes: 2900097C17Rik, Aar2, Gm14169

omitted Genes: Dlgap4, 4930405A21Rik, Tgif2

omitted Genes: 5430405H02Rik, 1110008F13Rik, Ndr3

omitted Genes: Soga1, Tldc2, Samhd1

omitted Genes: Mroh8, Rpn2, Ghrh

omitted Genes: Manbal, Nnat, Rprd1b

omitted Genes: 2010009K17Rik, Tgm2, D630003M21Rik

omitted Genes: 1700060C20Rik, Mir7685, Lbp

omitted Genes: Snhg17, Snhg11, Ralgapb

omitted Genes: Arhgap40, Gm14204, Slc32a1

omitted Genes: Mir3474, Ppp1r16b, Dhx35

omitted Genes: Top1, Plcg1, Zhx3

omitted Genes: Lpin3, Emilin3, L3mbtl1

omitted Genes: Ifi52, Mybl2, Mir7003

omitted Genes: Tor2, Inh2, Ocor1

Make more plots at <http://csg.sph.umich.edu/locuszoom/>



Fine-mapping Regions

| snp            | chr | pos (Mb) | pp | group        | color  |
|----------------|-----|----------|----|--------------|--------|
| chr2:158766733 | 2   | 158.7667 | 1  | Credible Set | purple |

F34 Array, iron content in liver

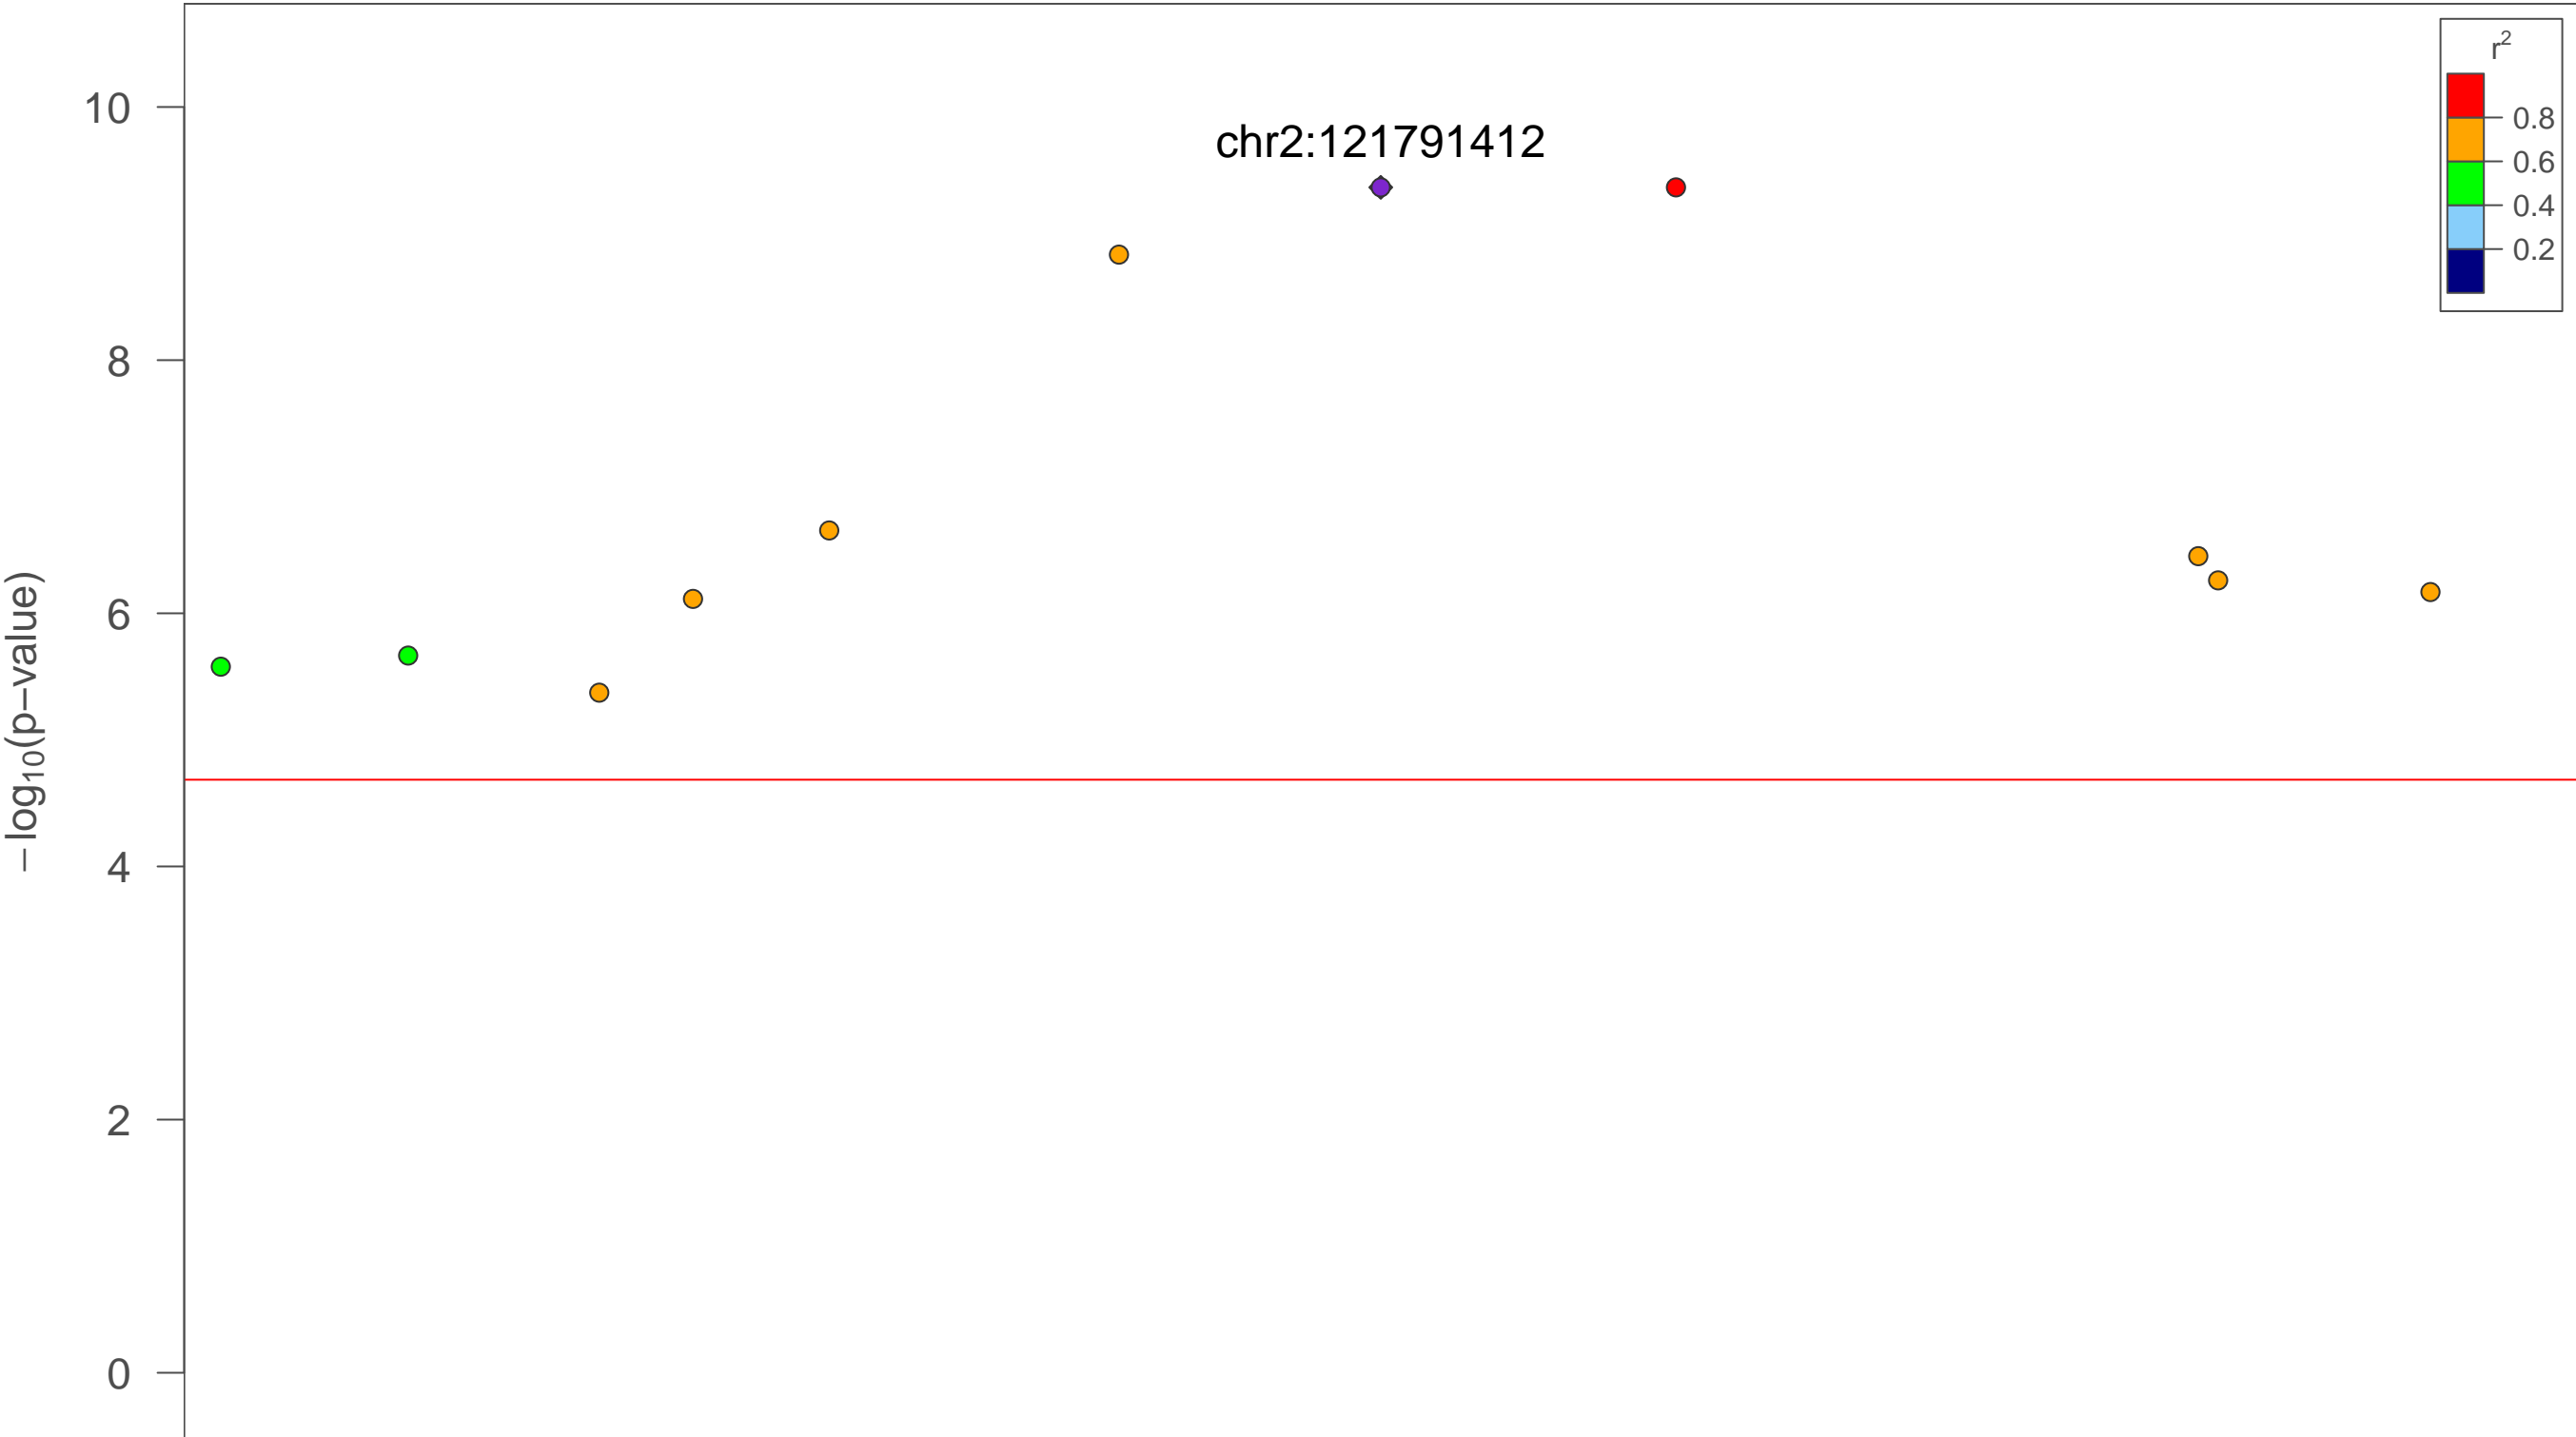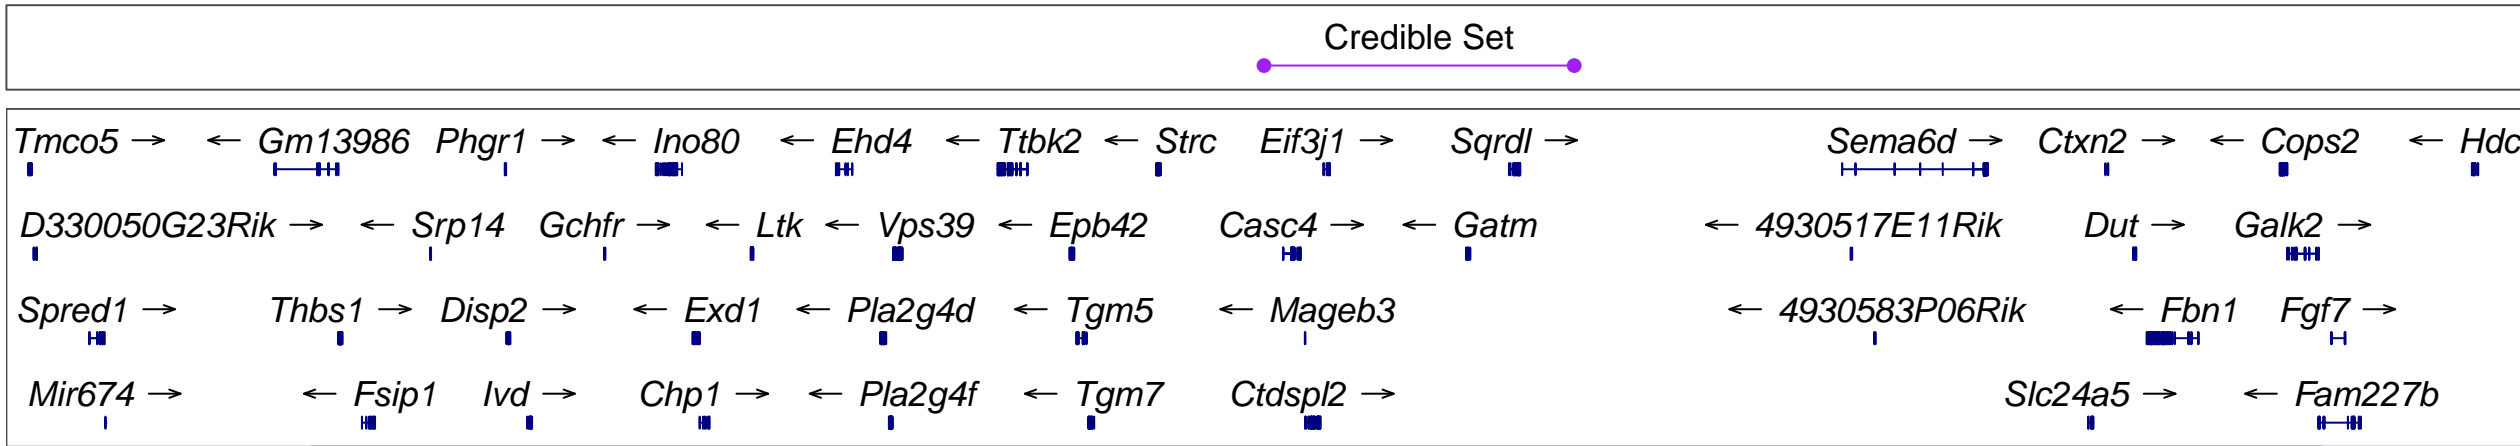

109 genes  
omitted

date: Thu Oct 25 16:54:14 2018

build: F34Array

display range: chr2:116791412–126791412 [116791412–126791412]

hilite range: 0 – 0 [ 0 – 0 ]

reference SNP: chr2:121791412

number of SNPs plotted: 12

min P-value: 4.31E–10 [chr2:121791412]

max P-value: 4.23E–6 [chr2:118526291]

omitted Genes: Fam98b, Rasgrp1, Gm13985

omitted Genes: 4930412B13Rik, Gpr176, 1700054M17Rik

omitted Genes: Eif2ak4, Bmf, Bub1b

omitted Genes: Pak6, Ankrd63, Plcb2

omitted Genes: Inafm2, A430105I19Rik, Knstrn

omitted Genes: Bahd1, Chst14, Ccdc32

omitted Genes: Rpusd2, Casc5, Rad51

omitted Genes: Rmdn3, Dnajc17, Gm14137

omitted Genes: Zfyve19, Ppp1r14d, Spint1

omitted Genes: Rhov, Vps18, Gm14207

omitted Genes: Dll4, Chac1, 1700020I14Rik

omitted Genes: Oip5, Nusap1, Ndufaf1

omitted Genes: Rtf1, Itpka, Rpap1

omitted Genes: Tyro3, Mga, Mapkbp1

omitted Genes: Mir7665, Jmjd7, Gm28042

omitted Genes: Pla2g4b, Pla2g4e, Tmem87a

omitted Genes: Ganc, 4931402G19Rik, Capn3

omitted Genes: Zfp106, Snap23, Lrrc57

omitted Genes: Haus2, Cdan1, AV039307

omitted Genes: Ubr1, Tmem62, Ccndbp1

omitted Genes: Lcmt2, Adal, Zscan29

omitted Genes: Tubgcp4, Trp53bp1, Map1a

omitted Genes: Ppip5k1, Ckmt1, Catsper2

omitted Genes: Pdla3, Ell3, Serf2

omitted Genes: Serinc4, Hypk, Mfap1b

omitted Genes: Mfap1a, Wdr76, Frmd5

omitted Genes: Spg11, Patl2, B2m

omitted Genes: Trim69, Terb2, Sord

omitted Genes: Duox2, Duoxa2, Duoxa1

omitted Genes: Duox1, Shf, Slc28a2

omitted Genes: Bambi-ps1, Gm14085, Spata5l1

omitted Genes: AA467107, Mir147, Slc20a4

Make more plots at <http://csg.sph.umich.edu/locuszoom/>

Fine-mapping Regions

| snp            | chr | pos (Mb) | pp  | group        | color  |
|----------------|-----|----------|-----|--------------|--------|
| chr2:121791412 | 2   | 121.7914 | 0.5 | Credible Set | purple |
| chr2:123024804 | 2   | 123.0248 | 0.5 | Credible Set | purple |

F34 Array, iron content in liver

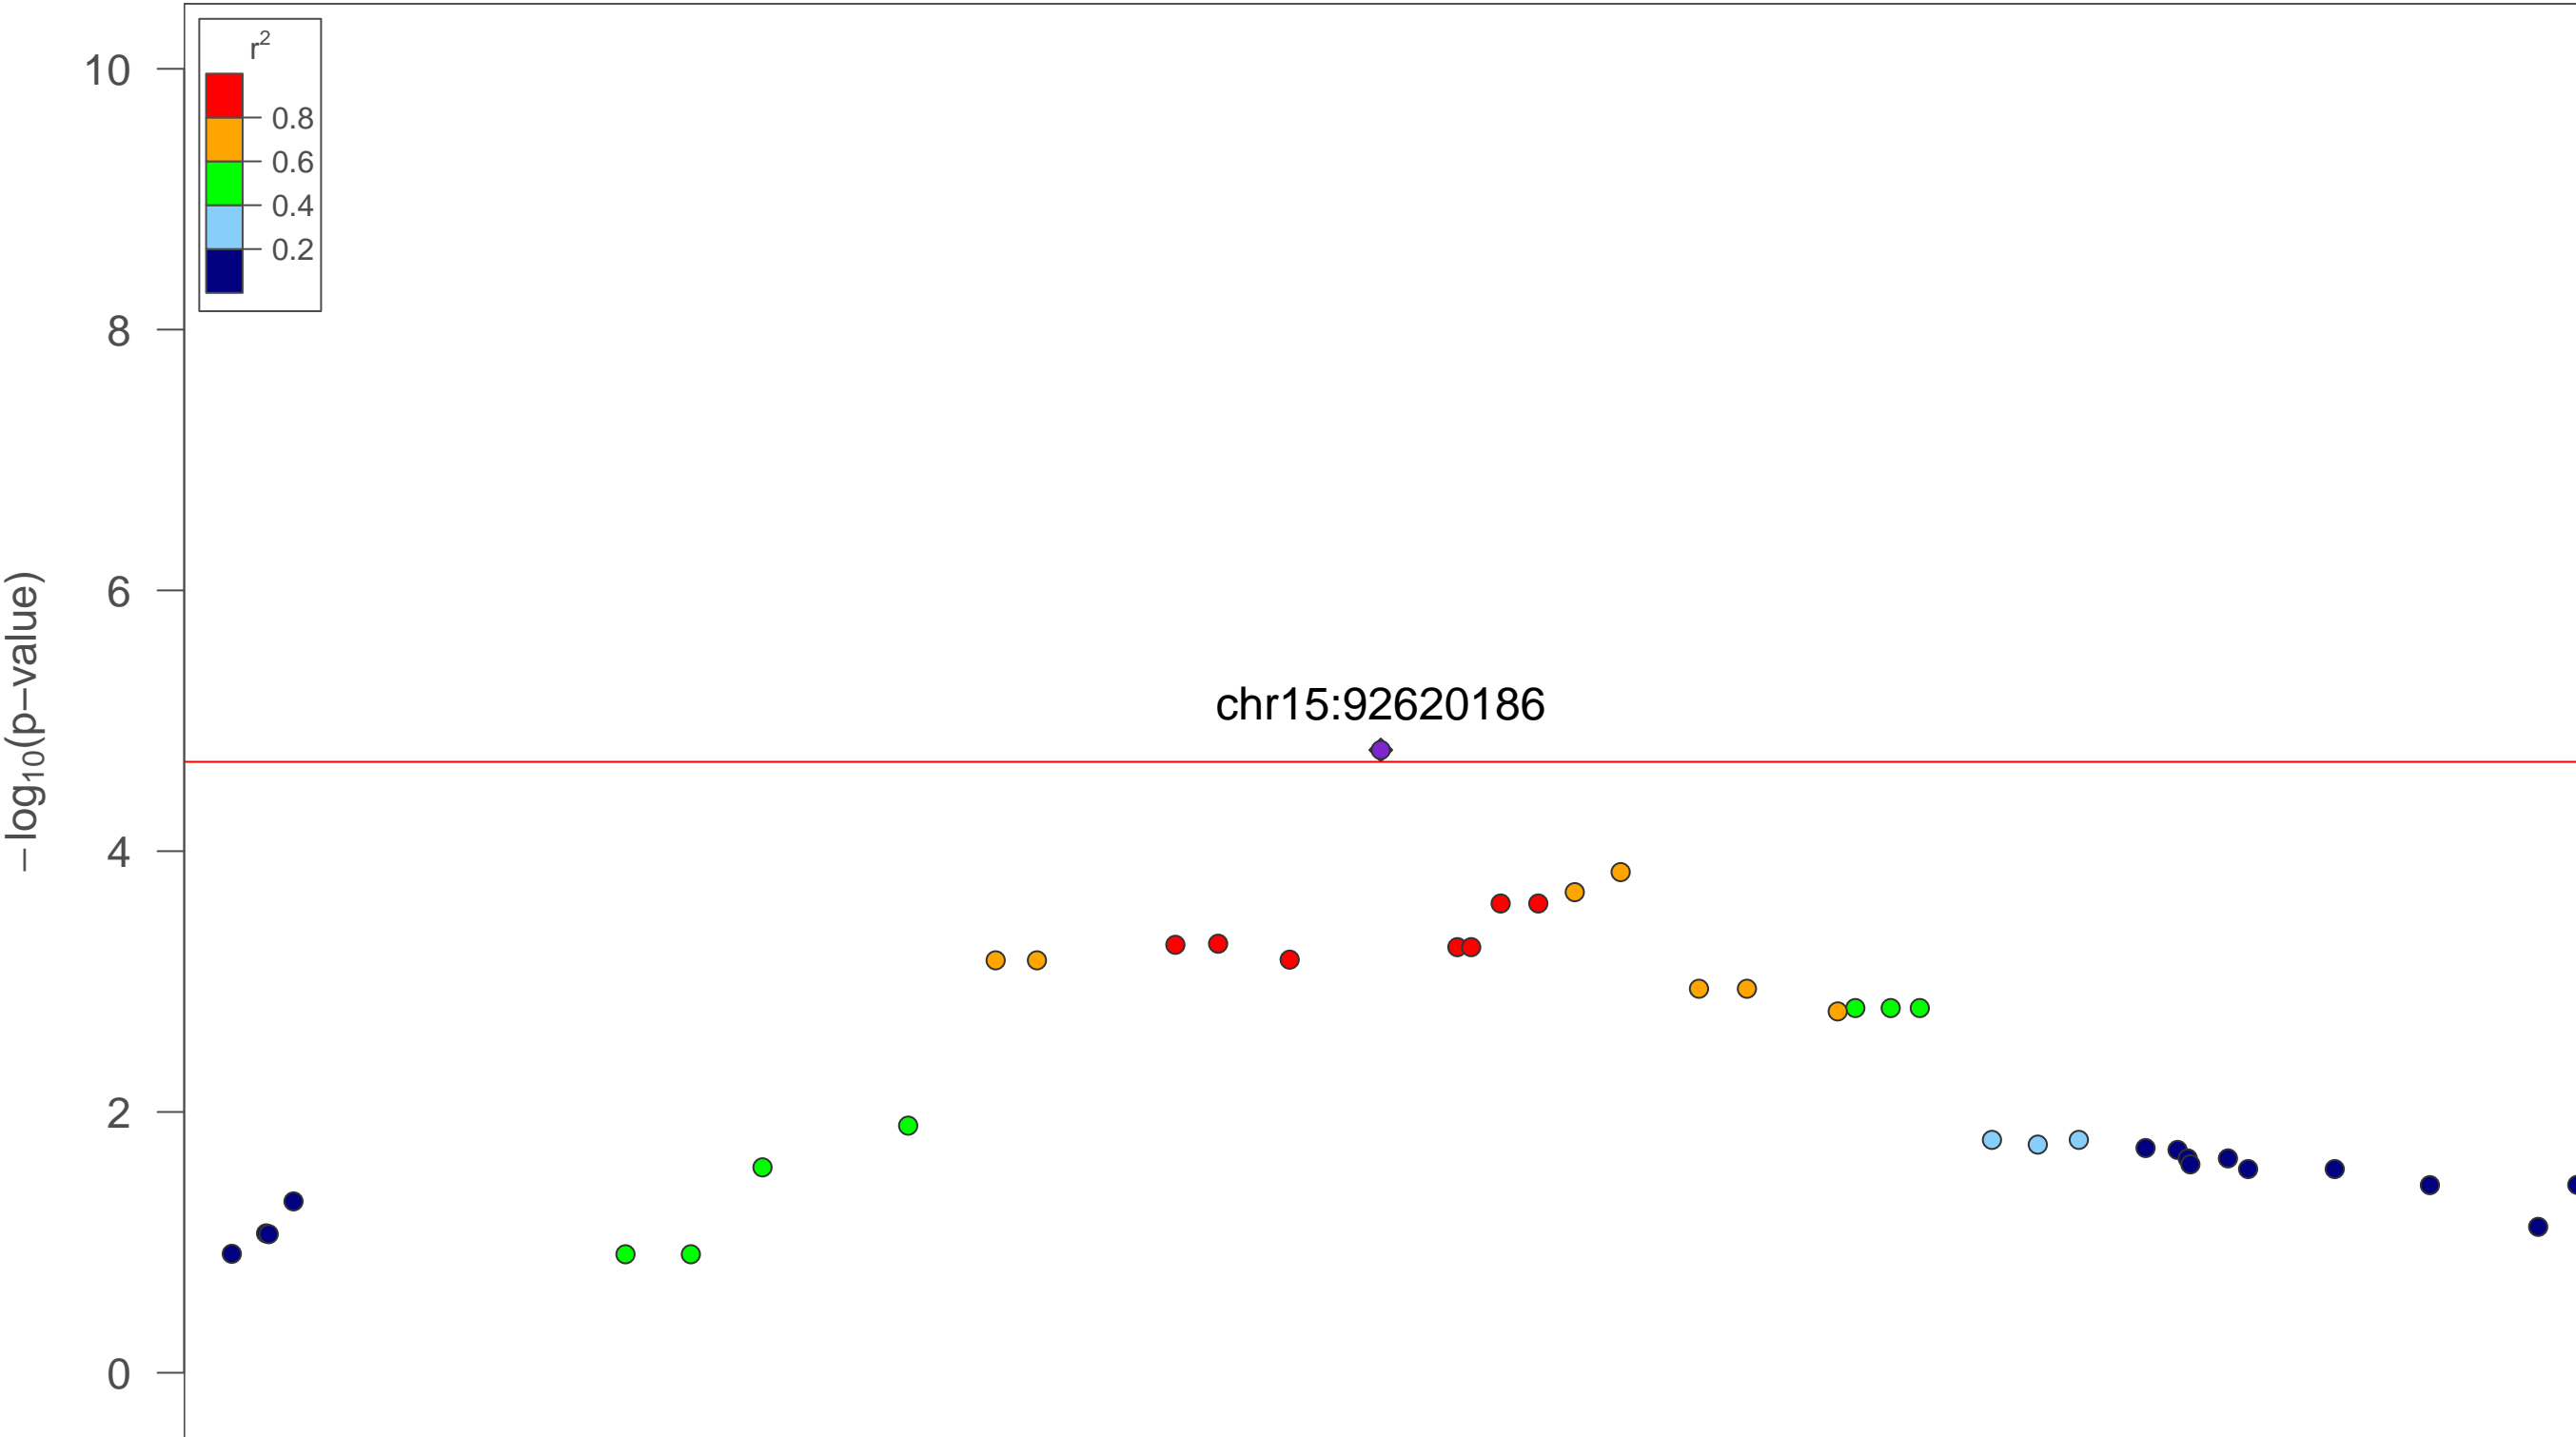

Credible Set

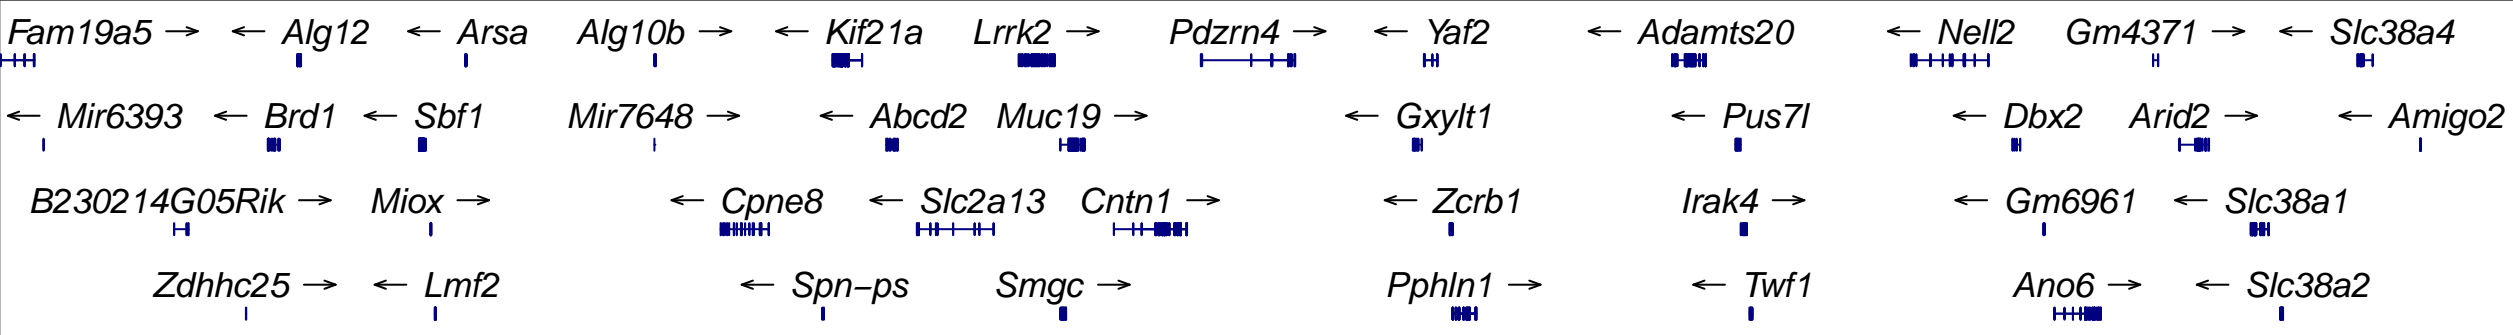

47 genes  
omitted

date: Thu Oct 25 16:54:05 2018  
build: F34Array  
display range: chr15:87620186–97620186 [87620186–97620186]  
hilite range: 0 – 0 [ 0 – 0 ]  
reference SNP: chr15:92620186  
number of SNPs plotted: 40  
min P-value: 1.68E–5 [chr15:92620186]  
max P-value: 1.23E–1 [chr15:89464513]  
omitted Genes: Zbed4, Creld2, Pim3  
omitted Genes: Ttl8, Mlc1, Mov10l1  
omitted Genes: Panx2, 1810021B22Rik, Trabd  
omitted Genes: Selo, Tubgcp6, Hdac10  
omitted Genes: Mapk12, Mapk11, Plxnb2  
omitted Genes: Mir7118, Dennd6b, Mir6958  
omitted Genes: Ppp6r2, Mir6959, Adm2  
omitted Genes: Ncaph2, Sco2, Tymp  
omitted Genes: Odf3b, Klhdc7b, Syce3  
omitted Genes: Cpt1b, Gm44502, Chkb  
omitted Genes: Mapk8ip2, C230037L18Rik, Shank3  
omitted Genes: Acr, Rabl2, Syt10  
omitted Genes: Prickle1, 9430014N10Rik, D630010B17Rik  
omitted Genes: Tmem117, LOC100043315, D030018L15Rik  
omitted Genes: 2610037D02Rik, 4833422M21Rik, E330033B04Rik  
omitted Genes: Scaf11, Pced1b

Fine-mapping Regions

| snp            | chr | pos (Mb) | pp         | group        | color  |
|----------------|-----|----------|------------|--------------|--------|
| chr15:91762000 | 15  | 91.76200 | 0.02909231 | Credible Set | purple |
| chr15:91940522 | 15  | 91.94052 | 0.02962923 | Credible Set | purple |
| chr15:92239534 | 15  | 92.23953 | 0.02279485 | Credible Set | purple |
| chr15:92620186 | 15  | 92.62019 | 0.74737959 | Credible Set | purple |
| chr15:92940135 | 15  | 92.94013 | 0.02798625 | Credible Set | purple |
| chr15:92997922 | 15  | 92.99792 | 0.02798625 | Credible Set | purple |
| chr15:93121022 | 15  | 93.12102 | 0.05756576 | Credible Set | purple |
| chr15:93278217 | 15  | 93.27822 | 0.05756576 | Credible Set | purple |

F34 Array, iron content in liver z score

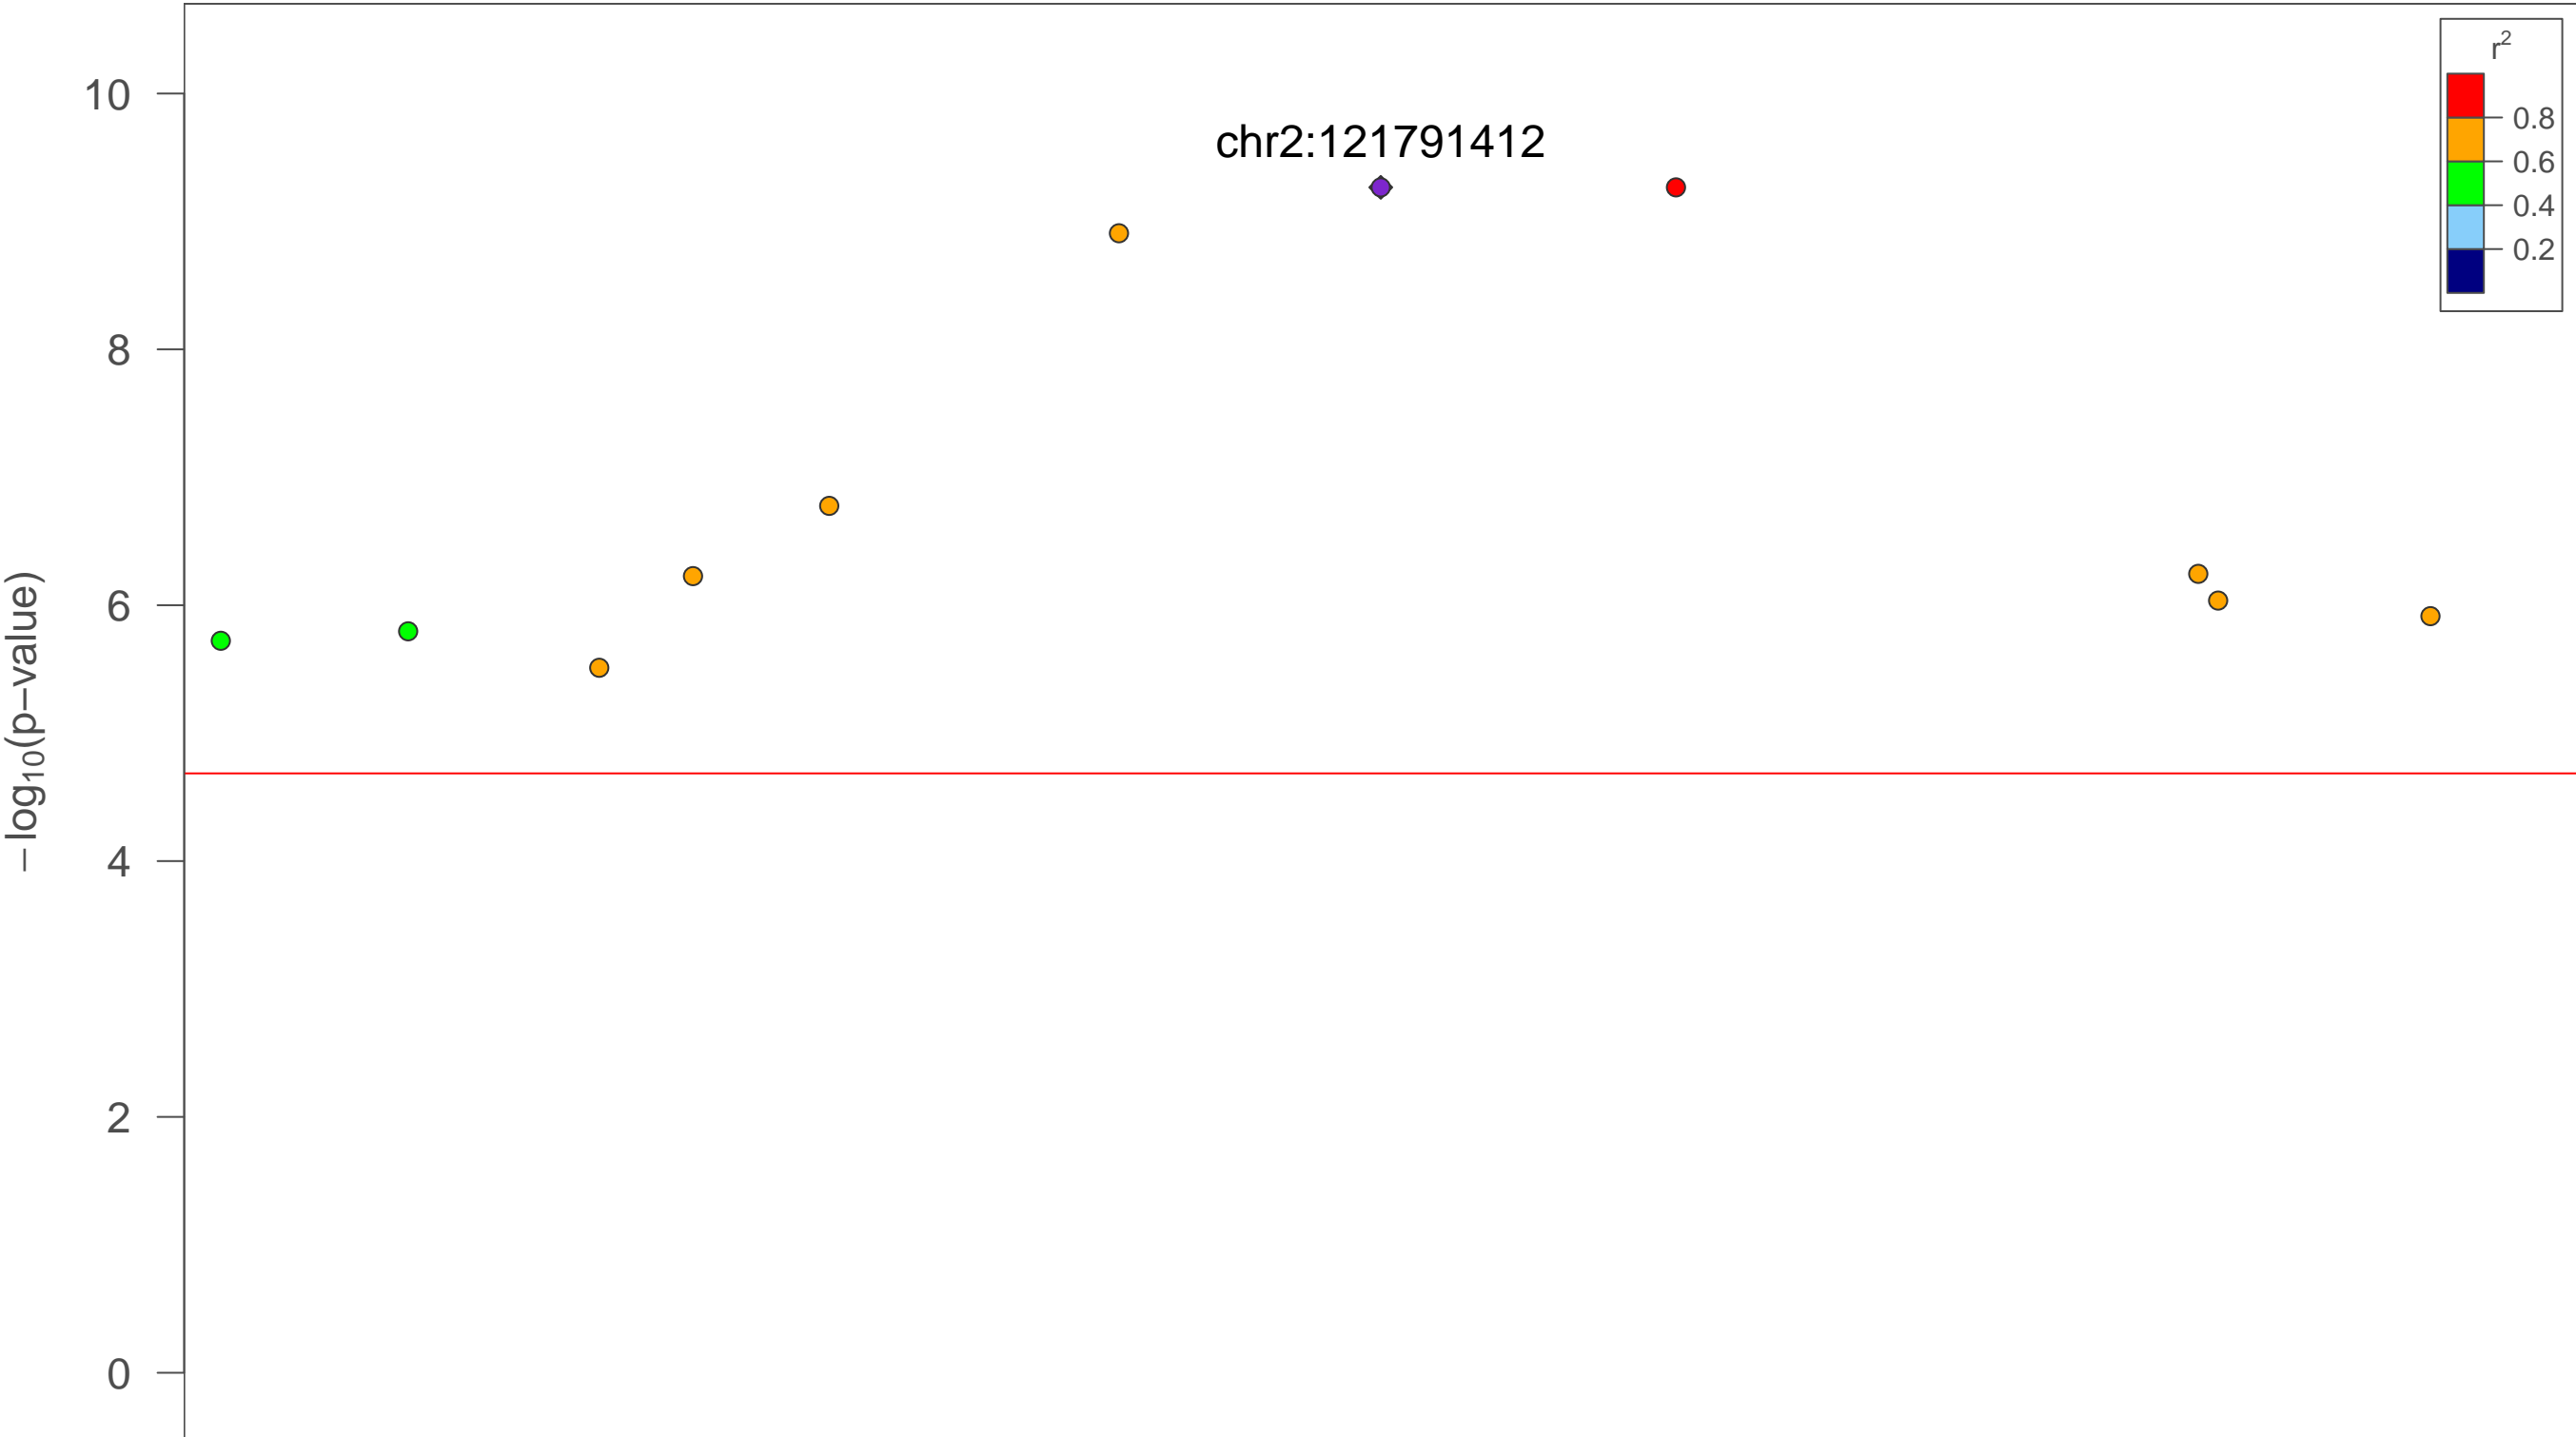

109 genes  
omitted



date: Thu Oct 25 16:54:32 2018

build: F34Array

display range: chr2:116791412–126791412 [116791412–126791412]

hilite range: 0 – 0 [ 0 – 0 ]

reference SNP: chr2:121791412

number of SNPs plotted: 12

min P-value: 5.41E–10 [chr2:121791412]

max P-value: 3.08E–6 [chr2:118526291]

omitted Genes: Fam98b, Rasgrp1, Gm13985

omitted Genes: 4930412B13Rik, Gpr176, 1700054M17Rik

omitted Genes: Eif2ak4, Bmf, Bub1b

omitted Genes: Pak6, Ankrd63, Plcb2

omitted Genes: Inafm2, A430105I19Rik, Knstrn

omitted Genes: Bahd1, Chst14, Ccdc32

omitted Genes: Rpusd2, Casc5, Rad51

omitted Genes: Rmdn3, Dnajc17, Gm14137

omitted Genes: Zfyve19, Ppp1r14d, Spint1

omitted Genes: Rhov, Vps18, Gm14207

omitted Genes: Dll4, Chac1, 1700020I14Rik

omitted Genes: Oip5, Nusap1, Ndufaf1

omitted Genes: Rtf1, Itpka, Rpap1

omitted Genes: Tyro3, Mga, Mapkbp1

omitted Genes: Mir7665, Jmjd7, Gm28042

omitted Genes: Pla2g4b, Pla2g4e, Tmem87a

omitted Genes: Ganc, 4931402G19Rik, Capn3

omitted Genes: Zfp106, Snap23, Lrrc57

omitted Genes: Haus2, Cdan1, AV039307

omitted Genes: Ubr1, Tmem62, Ccndbp1

omitted Genes: Lcmt2, Adal, Zscan29

omitted Genes: Tubgcp4, Trp53bp1, Map1a

omitted Genes: Ppip5k1, Ckmt1, Catsper2

omitted Genes: Pdla3, Ell3, Serf2

omitted Genes: Serinc4, Hypk, Mfap1b

omitted Genes: Mfap1a, Wdr76, Frmd5

omitted Genes: Spg11, Patl2, B2m

omitted Genes: Trim69, Terb2, Sord

omitted Genes: Duox2, Duoxa2, Duoxa1

omitted Genes: Duox1, Shf, Slc28a2

omitted Genes: Bambl-ps1, Gm14085, Spata51

omitted Genes: AA467107, Mir147, Slc20a4

Make more plots at <http://csg.sph.umich.edu/locuszoom/>

Fine-mapping Regions

| snp            | chr | pos (Mb) | pp  | group        | color  |
|----------------|-----|----------|-----|--------------|--------|
| chr2:121791412 | 2   | 121.7914 | 0.5 | Credible Set | purple |
| chr2:123024804 | 2   | 123.0248 | 0.5 | Credible Set | purple |

# F34 Array, iron content in liver z score

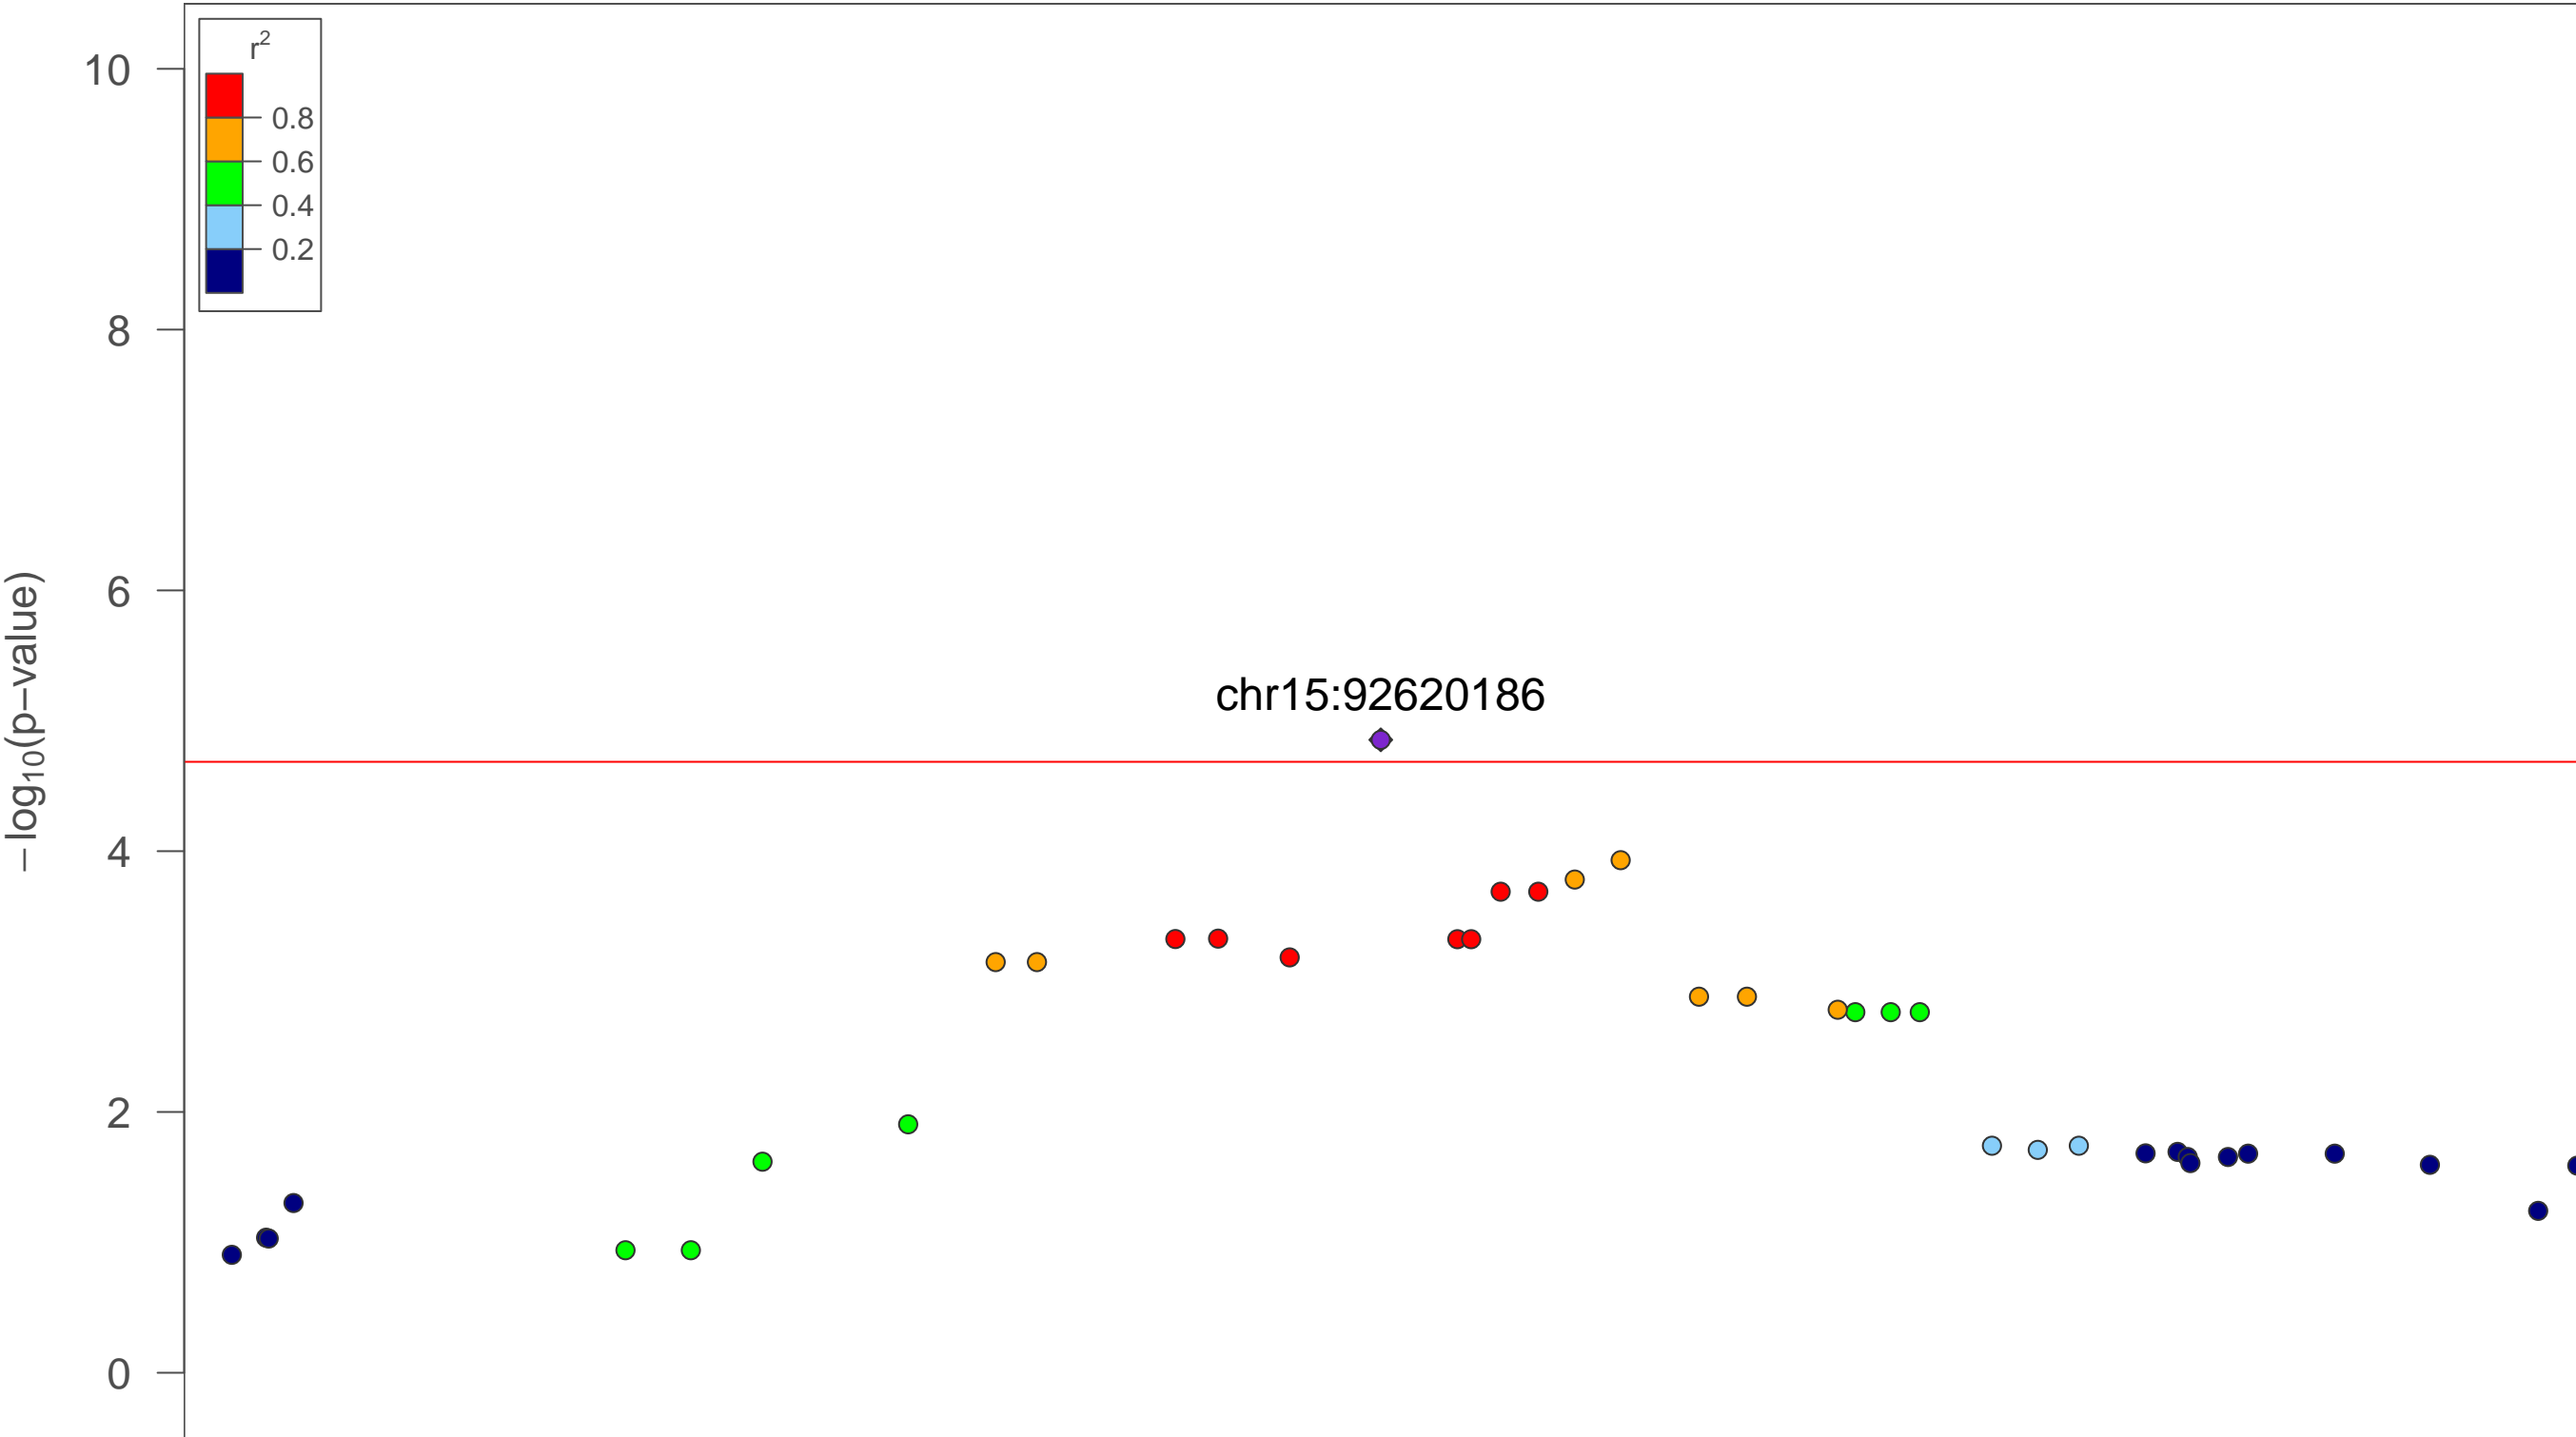

Credible Set

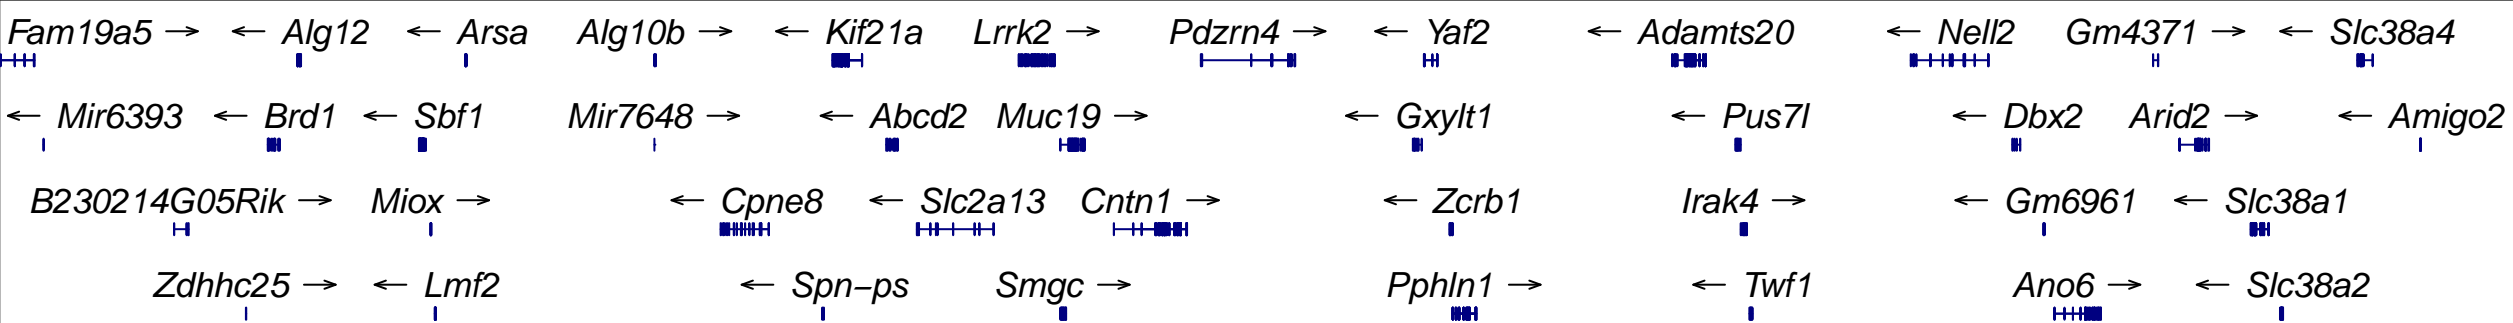

47 genes  
omitted

date: Thu Oct 25 16:54:23 2018  
build: F34Array  
display range: chr15:87620186–97620186 [87620186–97620186]  
hilite range: 0 – 0 [ 0 – 0 ]  
reference SNP: chr15:92620186  
number of SNPs plotted: 40  
min P-value: 1.4E–5 [chr15:92620186]  
max P-value: 1.25E–1 [chr15:87819815]  
omitted Genes: Zbed4, Creld2, Pim3  
omitted Genes: Tll8, Mlc1, Mov10l1  
omitted Genes: Panx2, 1810021B22Rik, Trabd  
omitted Genes: Selo, Tubgcp6, Hdac10  
omitted Genes: Mapk12, Mapk11, Plxnb2  
omitted Genes: Mir7118, Dennd6b, Mir6958  
omitted Genes: Ppp6r2, Mir6959, Adm2  
omitted Genes: Ncaph2, Sco2, Tymp  
omitted Genes: Odf3b, Klhdc7b, Syce3  
omitted Genes: Cpt1b, Gm44502, Chkb  
omitted Genes: Mapk8ip2, C230037L18Rik, Shank3  
omitted Genes: Acr, Rabl2, Syt10  
omitted Genes: Prickle1, 9430014N10Rik, D630010B17Rik  
omitted Genes: Tmem117, LOC100043315, D030018L15Rik  
omitted Genes: 2610037D02Rik, 4833422M21Rik, E330033B04Rik  
omitted Genes: Scaf11, Pced1b

Fine-mapping Regions

| snp            | chr | pos (Mb) | pp         | group        | color  |
|----------------|-----|----------|------------|--------------|--------|
| chr15:91762000 | 15  | 91.76200 | 0.02714178 | Credible Set | purple |
| chr15:91940522 | 15  | 91.94052 | 0.02732672 | Credible Set | purple |
| chr15:92239534 | 15  | 92.23953 | 0.02006520 | Credible Set | purple |
| chr15:92620186 | 15  | 92.62019 | 0.75258098 | Credible Set | purple |
| chr15:92940135 | 15  | 92.94013 | 0.02707327 | Credible Set | purple |
| chr15:92997922 | 15  | 92.99792 | 0.02707327 | Credible Set | purple |
| chr15:93121022 | 15  | 93.12102 | 0.05936939 | Credible Set | purple |
| chr15:93278217 | 15  | 93.27822 | 0.05936939 | Credible Set | purple |

F34 Array, iron content in spleen

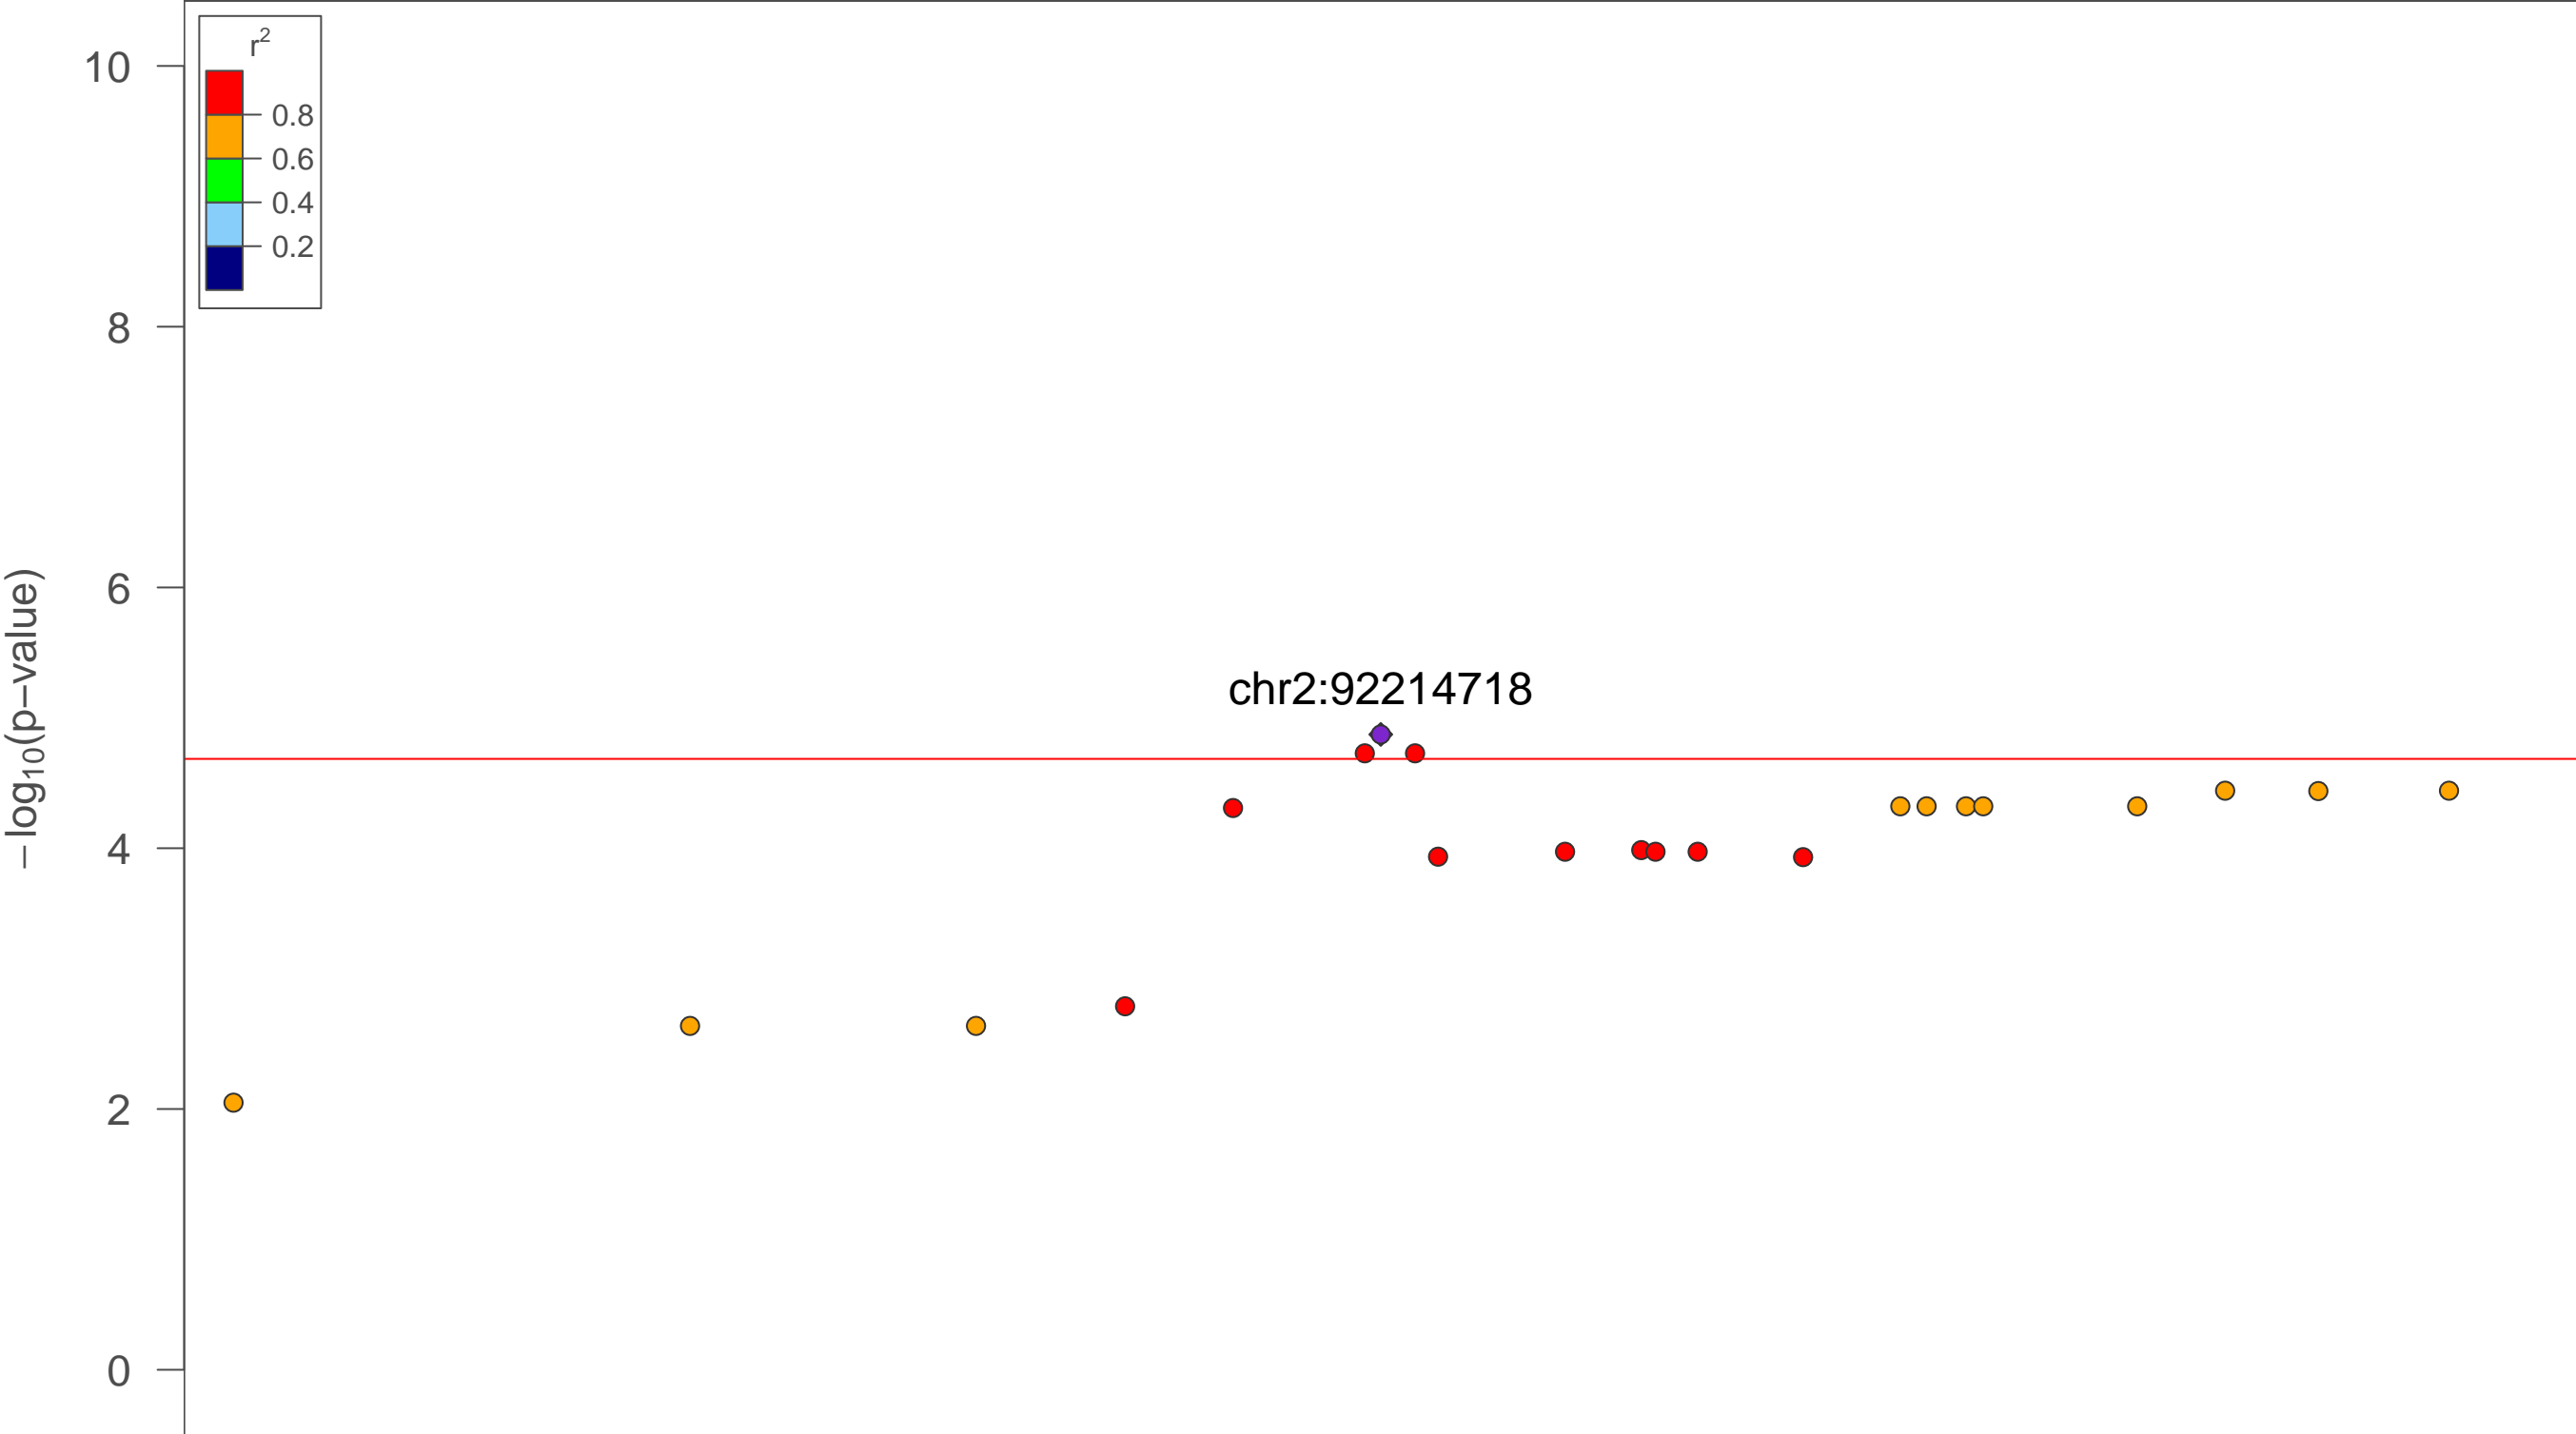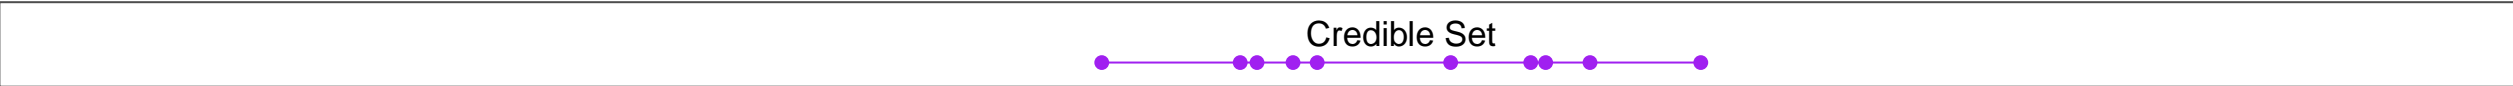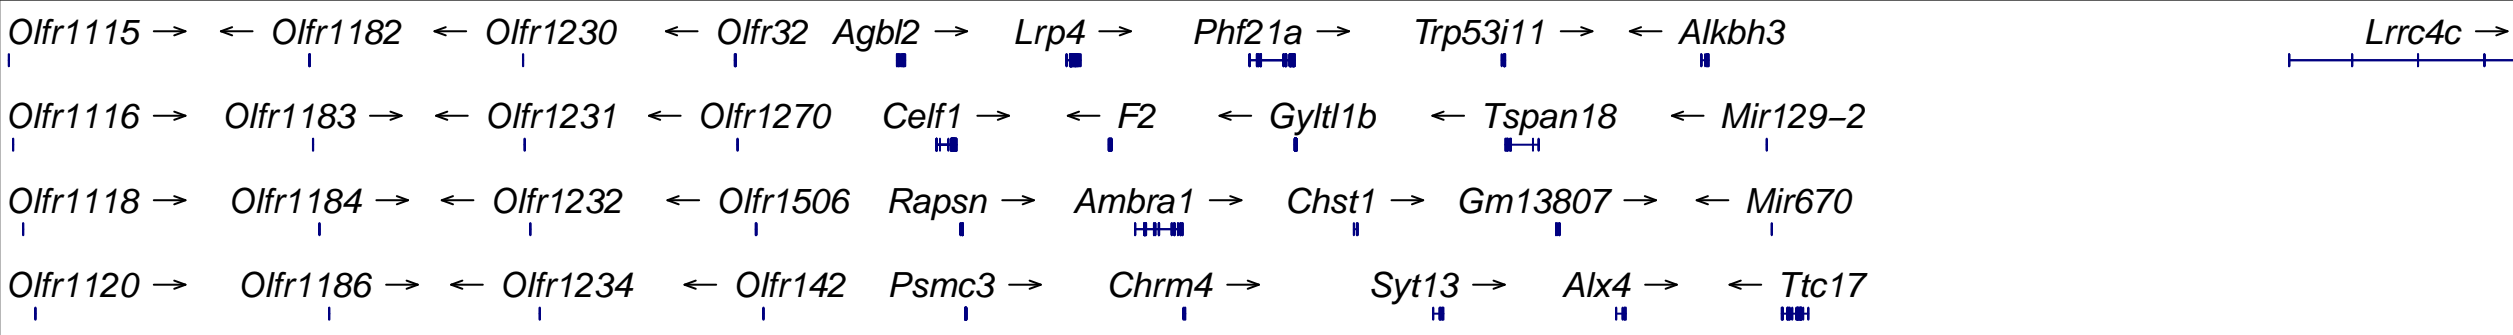

172 genes  
omitted

date: Thu Oct 25 16:54:50 2018

build: F34Array

display range: chr2:87214718–97214718 [87214718–97214718]

hilite range: 0 – 0 [ 0 – 0 ]

reference SNP: chr2:92214718

number of SNPs plotted: 23

min P-value: 1.34E–5 [chr2:92214718]

max P-value: 8.94E–3 [chr2:87421495]

omitted Genes: Olfr1121, Olfr1122, Olfr1123

omitted Genes: Olfr1124, Olfr1126, Pramel7

omitted Genes: Pramel6, Olfr153, Olfr1128

omitted Genes: Olfr1129, Olfr1130, Olfr1131

omitted Genes: Olfr1132, Olfr1133, Olfr1134

omitted Genes: Olfr1135, Olfr1136, Olfr1137

omitted Genes: Olfr1138, Olfr1140, Olfr1141

omitted Genes: Olfr152, Olfr1143, Olfr1145

omitted Genes: Olfr1148, Olfr1151, Olfr1152

omitted Genes: Olfr1153, Olfr1154, Olfr1155

omitted Genes: Olfr1156, Olfr1157, Olfr74

omitted Genes: Olfr1158, Olfr1160, Olfr1161

omitted Genes: Olfr73, Olfr1162, Olfr1163

omitted Genes: Olfr1164, Olfr1166, Olfr1167

omitted Genes: Olfr1168, Olfr1170, Olfr1173

omitted Genes: Olfr1176, Olfr1178, Olfr1179

omitted Genes: Olfr1180, Olfr1181, Olfr1188

omitted Genes: Olfr1189, Olfr1193, Olfr1195

omitted Genes: Olfr1196, Olfr1197, Olfr1198

omitted Genes: Olfr1199, Olfr1200, Olfr1201

omitted Genes: Olfr1202, Olfr1205, Olfr1204

omitted Genes: Olfr1206, Olfr1208, Olfr1209

omitted Genes: Olfr1211, Olfr1212, Olfr1213

omitted Genes: Olfr1214, Olfr1215, Olfr1216

omitted Genes: Olfr1217, Olfr1218, Olfr1219

omitted Genes: Olfr1220, Olfr1221, Olfr1222

omitted Genes: Olfr1223, Olfr1225, Olfr1226

omitted Genes: Olfr1228, Olfr1229, Olfr1233

omitted Genes: Olfr1238, Olfr1239, Olfr1240

omitted Genes: Olfr1241, Olfr1242, Olfr1243

omitted Genes: Olfr1245, Olfr1246, Olfr1247

omitted Genes: Olfr1248, Olfr1249, Olfr1250

Make more plots at <http://csg.sph.umich.edu/locuszoom/>

Fine-mapping Regions

| snp           | chr | pos (Mb) | pp         | group        | color  |
|---------------|-----|----------|------------|--------------|--------|
| chr2:91597466 | 2   | 91.59747 | 0.08123578 | Credible Set | purple |
| chr2:92147975 | 2   | 92.14798 | 0.20341544 | Credible Set | purple |
| chr2:92214718 | 2   | 92.21472 | 0.27947380 | Credible Set | purple |
| chr2:92357966 | 2   | 92.35797 | 0.20341544 | Credible Set | purple |
| chr2:92454070 | 2   | 92.45407 | 0.03604329 | Credible Set | purple |
| chr2:92984633 | 2   | 92.98463 | 0.03912820 | Credible Set | purple |
| chr2:93303076 | 2   | 93.30308 | 0.04020689 | Credible Set | purple |
| chr2:93362468 | 2   | 93.36247 | 0.03912820 | Credible Set | purple |
| chr2:93538754 | 2   | 93.53875 | 0.03912820 | Credible Set | purple |
| chr2:93979130 | 2   | 93.97913 | 0.03576123 | Credible Set | purple |



F34 Array, iron content in spleen

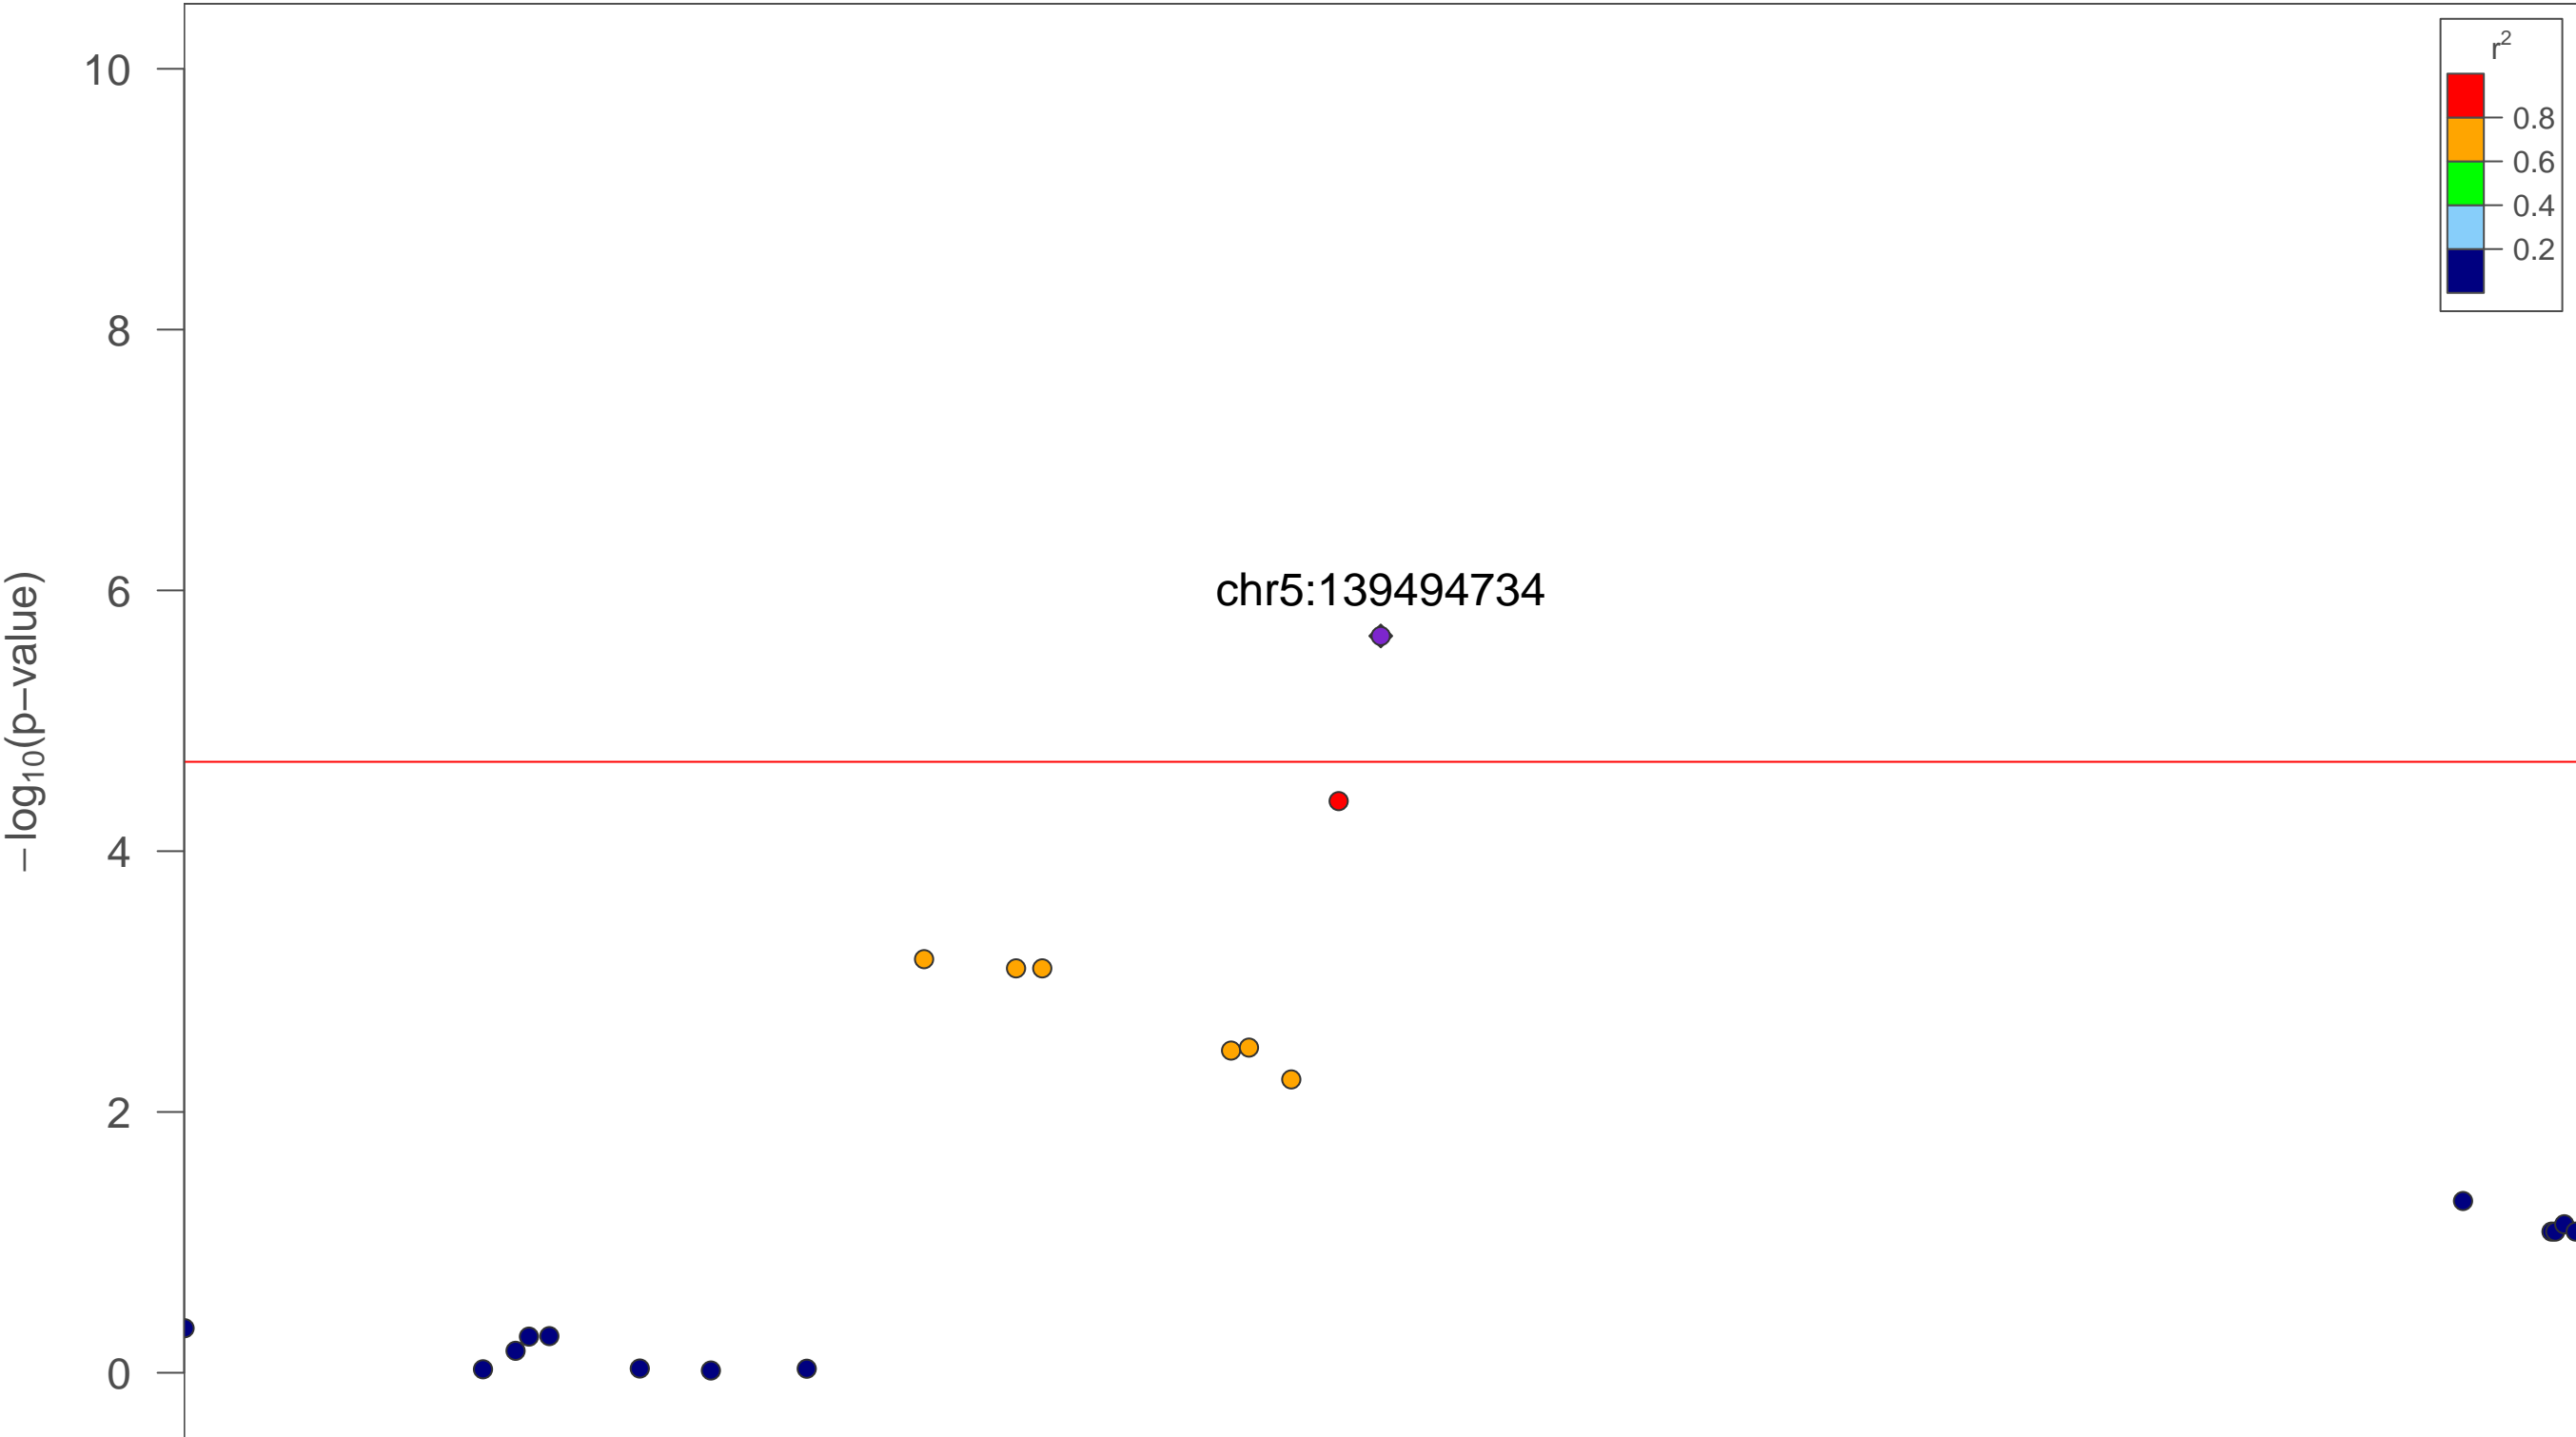

Credible Set

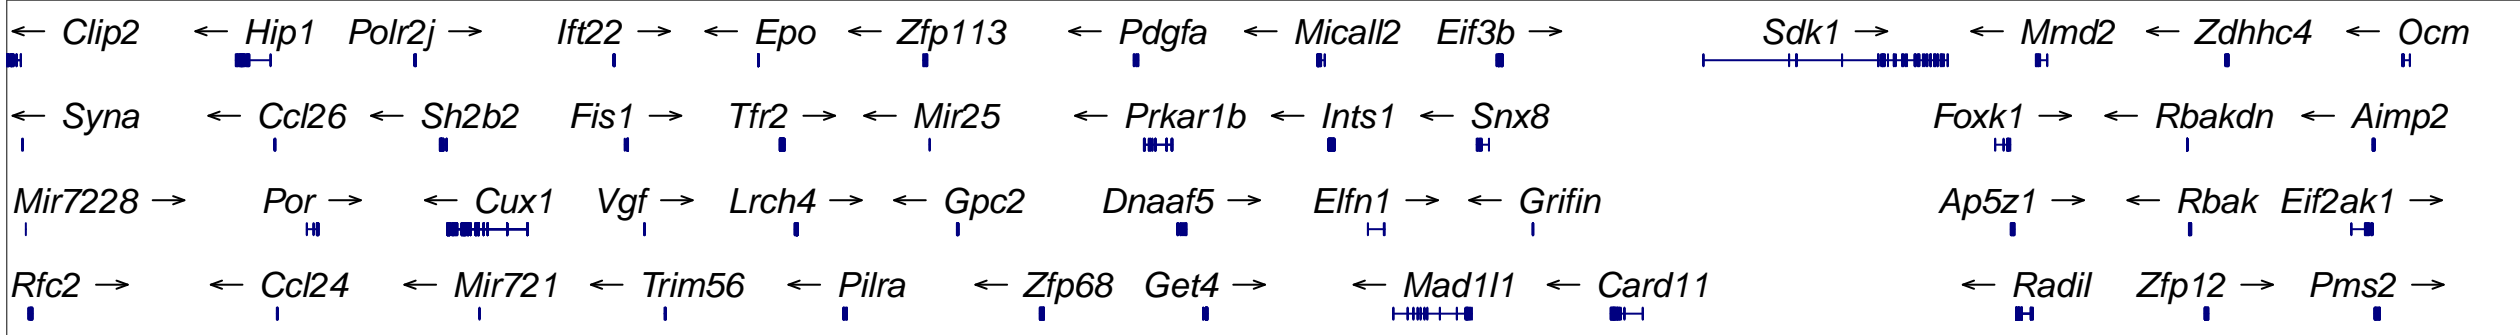

167 genes  
omitted

date: Thu Oct 25 16:55:01 2018

build: F34Array

display range: chr5:134494734–144494734 [134494734–144494734]

hilite range: 0 – 0 [ 0 – 0 ]

reference SNP: chr5:139494734

number of SNPs plotted: 22

min P-value: 2.24E–6 [chr5:139494734]

max P-value: 9.6E–1 [chr5:136695919]

omitted Genes: Lat2, Eif4h, Limk1

omitted Genes: Eln, Wbscr28, Cldn13

omitted Genes: Wbscr27, Cldn4, Cldn3

omitted Genes: Wbscr25, Abhd11, Abhd11os

omitted Genes: Stx1a, Wbscr22, Dnajc30

omitted Genes: Vps37d, Mlxipl, Tbl2

omitted Genes: Bcl7b, Baz1b, Fzd9

omitted Genes: Fkbp6, Trim50, Nsun5

omitted Genes: Pom121, Mir7033, Rhbdd2

omitted Genes: Tmem120a, Mir7034, Styxl1

omitted Genes: Mdh2, Srrm3, Hspb1

omitted Genes: Ywhag, Ssc4d, Zp3

omitted Genes: Dtx2, Upk3b, Upk3bl

omitted Genes: Rasa4, Mir7035, Lrwd1

omitted Genes: Alkbh4, Orai2, Prkrip1

omitted Genes: Myl10, Col26a1, 4933404O12Rik

omitted Genes: Cldn15, Znhit1, Plod3

omitted Genes: Mir702, Ap1s1, Serpine1

omitted Genes: Ache, Mir8116, Ufsp1

omitted Genes: Srrt, Mir7036, Trip6

omitted Genes: Slc12a9, Ephb4, Zan

omitted Genes: Pop7, Gigyf1, Gnb2

omitted Genes: Mir6418, Actl6b, Mospd3

omitted Genes: Pcolce, Fbxo24, Gm20605

omitted Genes: Sap25, Irs3, Agfg2

omitted Genes: Nyap1, Tsc22d4, Ppp1r35

omitted Genes: Mepce, Zcwpw1, Pilrb1

omitted Genes: Pilrb2, Cyp3a13, Gjc3

omitted Genes: Azgp1, Smok3a, Smok3b

omitted Genes: Smok3c, Zkscan1, Zscan21

omitted Genes: Cops6, Mcm7, Mir93

omitted Genes: Mir106b, An4m1, Tcf6

Make more plots at <http://csg.sph.umich.edu/locuszoom/>

Fine-mapping Regions

| snp            | chr | pos (Mb) | pp         | group        | color  |
|----------------|-----|----------|------------|--------------|--------|
| chr5:139318848 | 5   | 139.3188 | 0.05815931 | Credible Set | purple |
| chr5:139494734 | 5   | 139.4947 | 0.94184069 | Credible Set | purple |

F34 Array, iron content in spleen

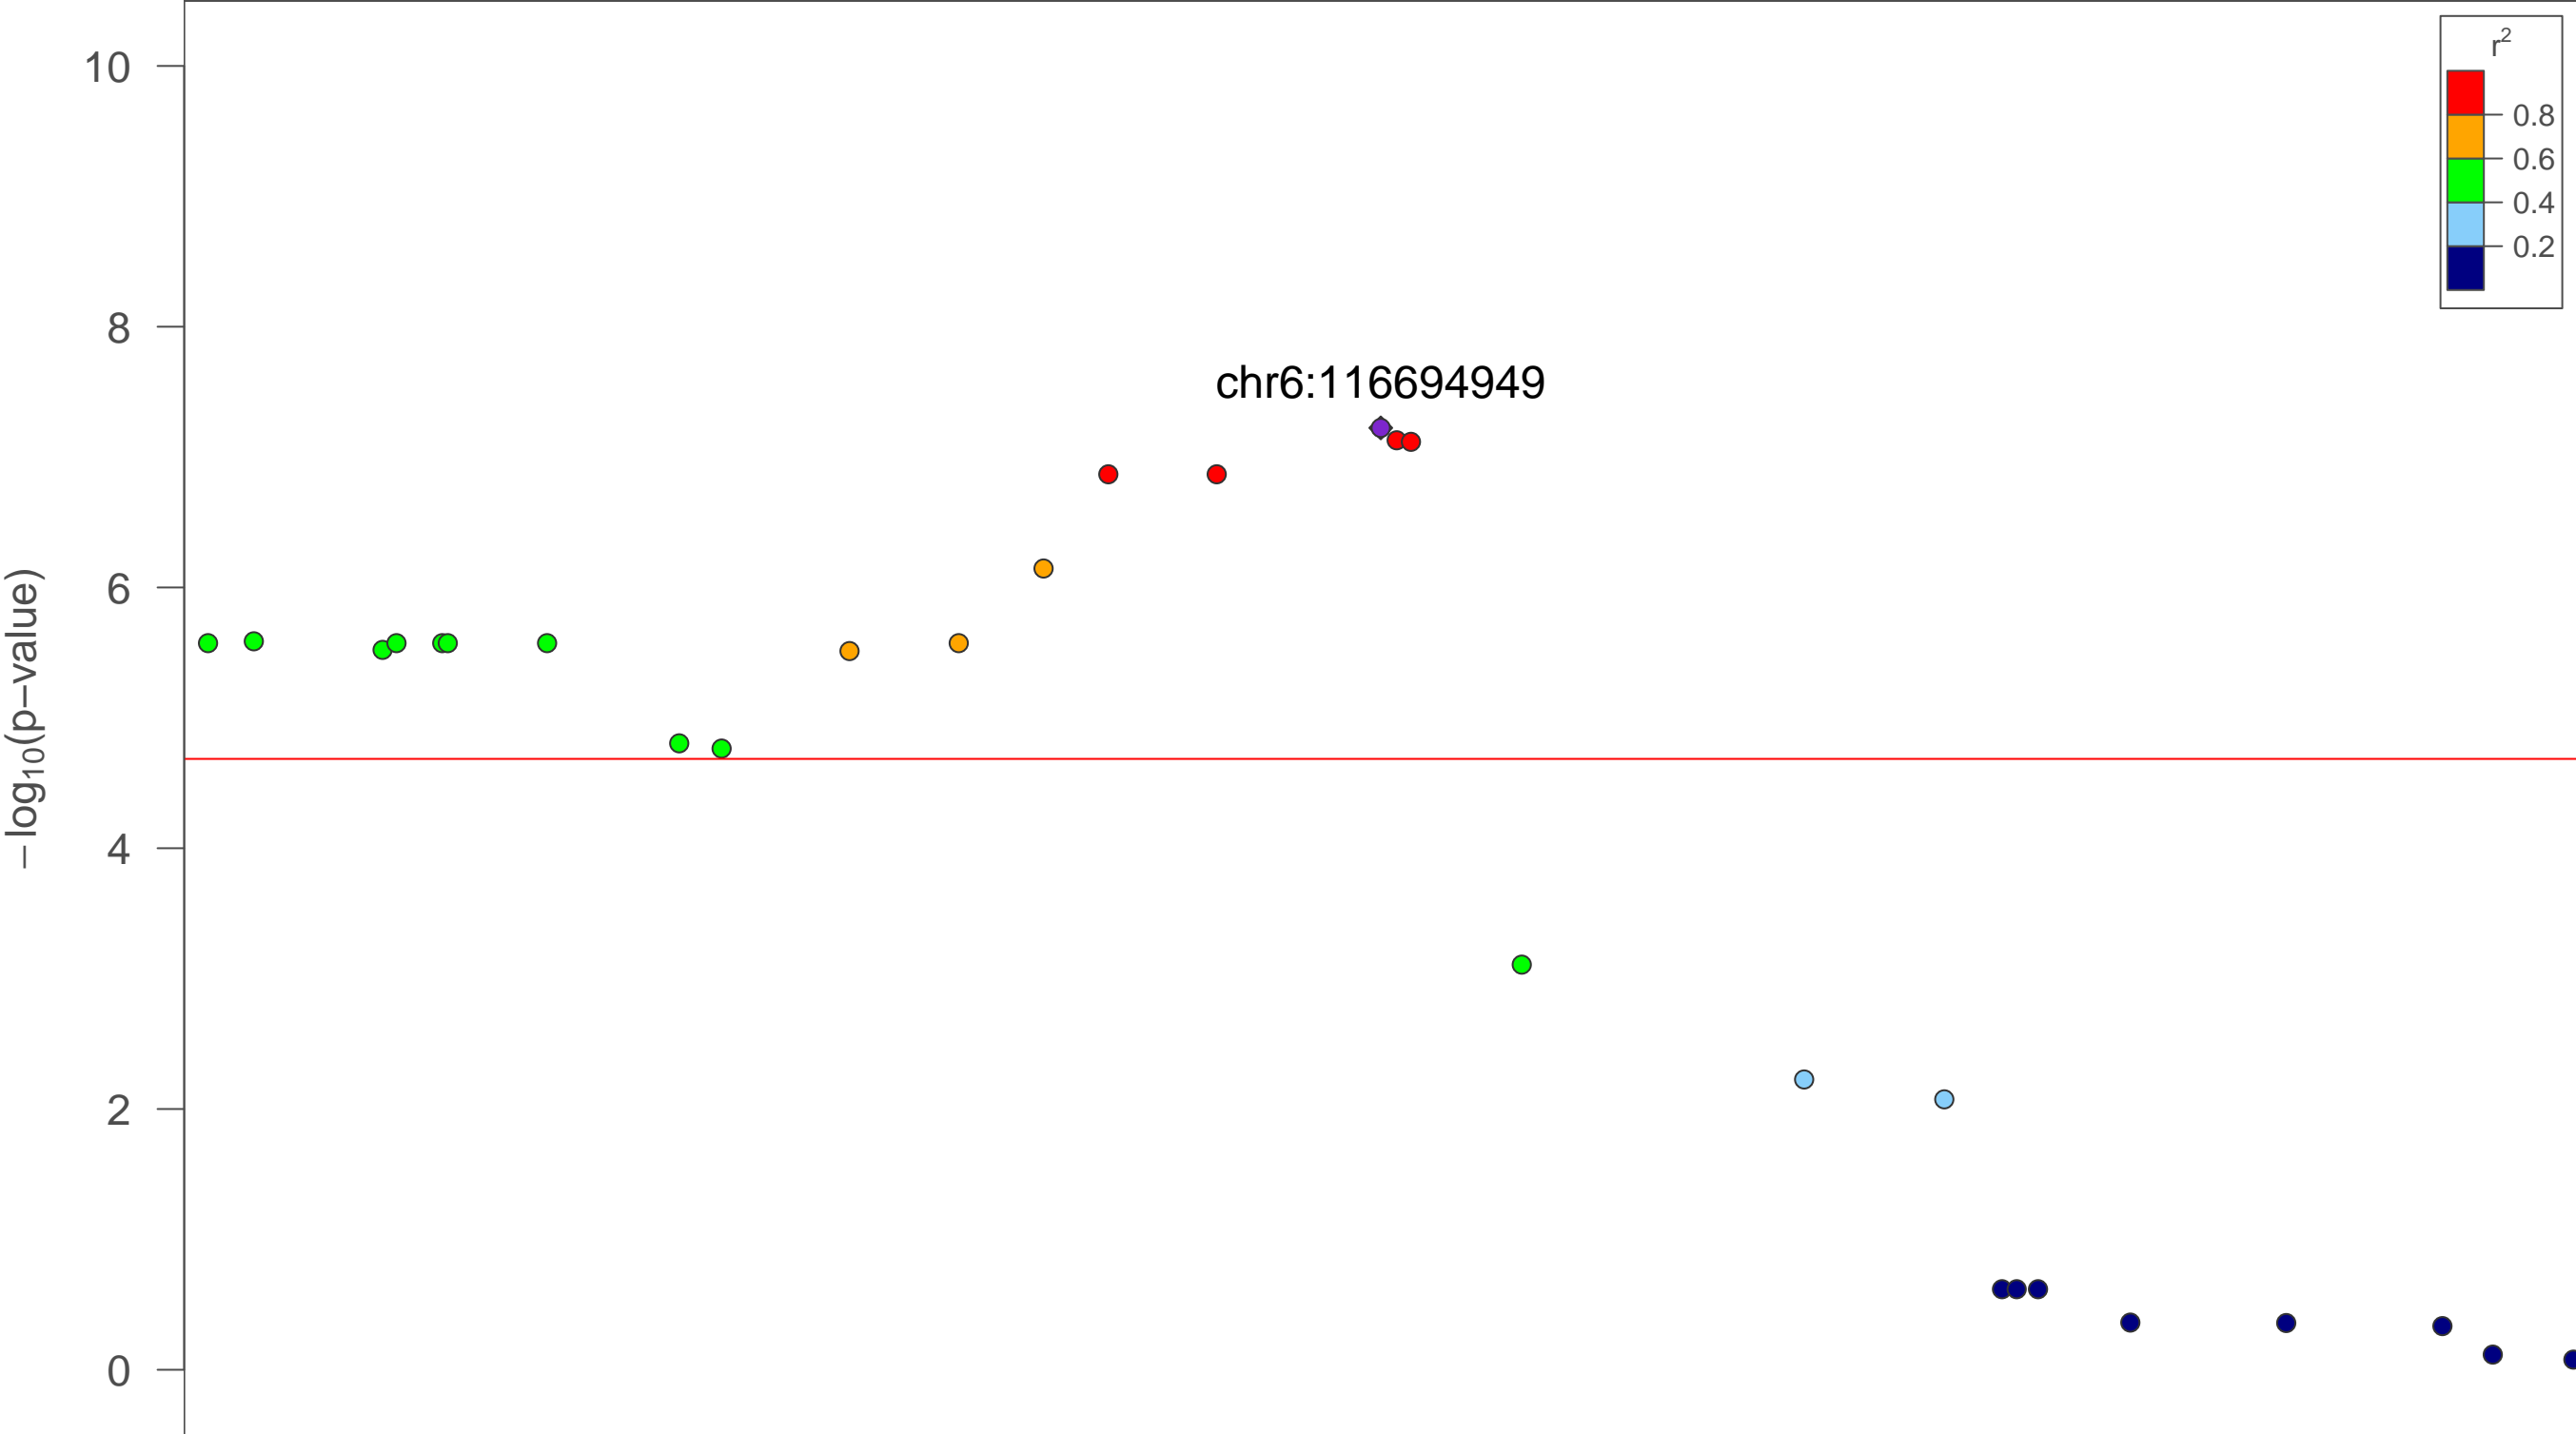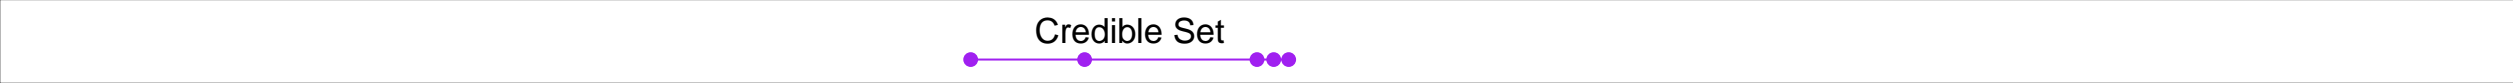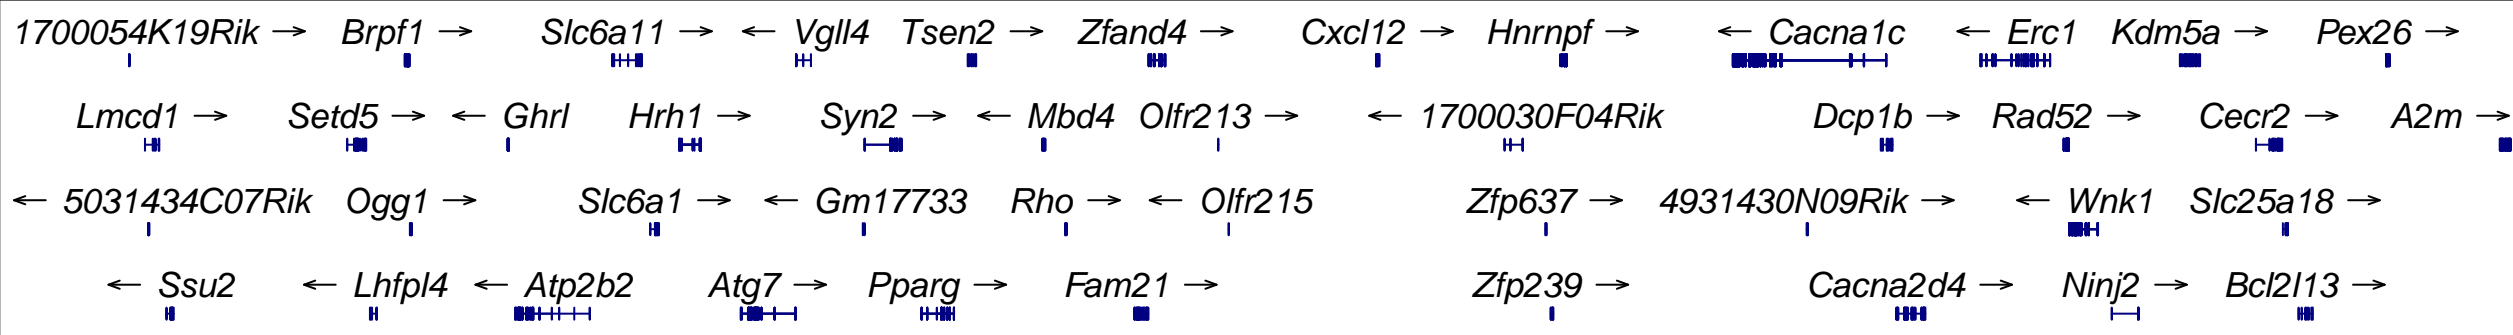

85 genes  
omitted

date: Thu Oct 25 16:55:10 2018  
build: F34Array  
display range: chr6:111694949–121694949 [111694949–121694949]  
hilite range: 0 – 0 [ 0 – 0 ]  
reference SNP: chr6:116694949  
number of SNPs plotted: 29  
min P-value: 5.97E–8 [chr6:116694949]  
max P-value: 8.36E–1 [chr6:121677793]  
omitted Genes: Cav3, Oxtr, Rad18  
omitted Genes: Srgap3, Thumpd3, Gt(ROSA)26Sor  
omitted Genes: Mtmr14, Cpne9, Camk1  
omitted Genes: Tada3, Arpc4, Tll3  
omitted Genes: Rpusd3, Cidec, Jagn1  
omitted Genes: Il17re, Il17rc, Creld1  
omitted Genes: Prrt3, Emc3, Fancd2  
omitted Genes: Fancd2os, Brk1, Vhl  
omitted Genes: Irak2, Tatdn2, Mir7042  
omitted Genes: Sec13, Tamm41, Timp4  
omitted Genes: Mkrn2os, Mkrn2, Raf1  
omitted Genes: Tmem40, Cand2, Mir7660  
omitted Genes: Rpl32, Snora7a, Efcab12  
omitted Genes: Ift122, H1foo, Plxnd1  
omitted Genes: Tmcc1, 9530062K07Rik, March8  
omitted Genes: Alox5, Olfr211, Olfr212  
omitted Genes: Olfr214, Zfp422, Rassf4  
omitted Genes: Mir7043, 8430408G22Rik, Tmem72  
omitted Genes: Fxyd4, Rasgef1a, Mir7044  
omitted Genes: Csgalnact2, Ret, 1700069P05Rik  
omitted Genes: Gm30498, Bms1, Zfp248  
omitted Genes: Zfp9, Ankrd26, Lrtm2  
omitted Genes: Adipor2, Wnt5b, Fbxl14  
omitted Genes: 3110021A11Rik, Mir706, B4galnt3  
omitted Genes: Ccdc77, Il17ra, Cecr6  
omitted Genes: Cecr5, 1700072O05Rik, Atp6v1e1  
omitted Genes: Bid, Mical3, Tuba8  
omitted Genes: Usp18, Slc6a13, Slc6a12  
omitted Genes: Iqsec3

Fine-mapping Regions

| snp            | chr | pos (Mb) | pp        | group        | color  |
|----------------|-----|----------|-----------|--------------|--------|
| chr6:115556641 | 6   | 115.5566 | 0.1292022 | Credible Set | purple |
| chr6:116009500 | 6   | 116.0095 | 0.1292022 | Credible Set | purple |
| chr6:116694949 | 6   | 116.6949 | 0.2854410 | Credible Set | purple |
| chr6:116761437 | 6   | 116.7614 | 0.2310870 | Credible Set | purple |
| chr6:116820969 | 6   | 116.8210 | 0.2250676 | Credible Set | purple |

F34 Array, iron content in spleen

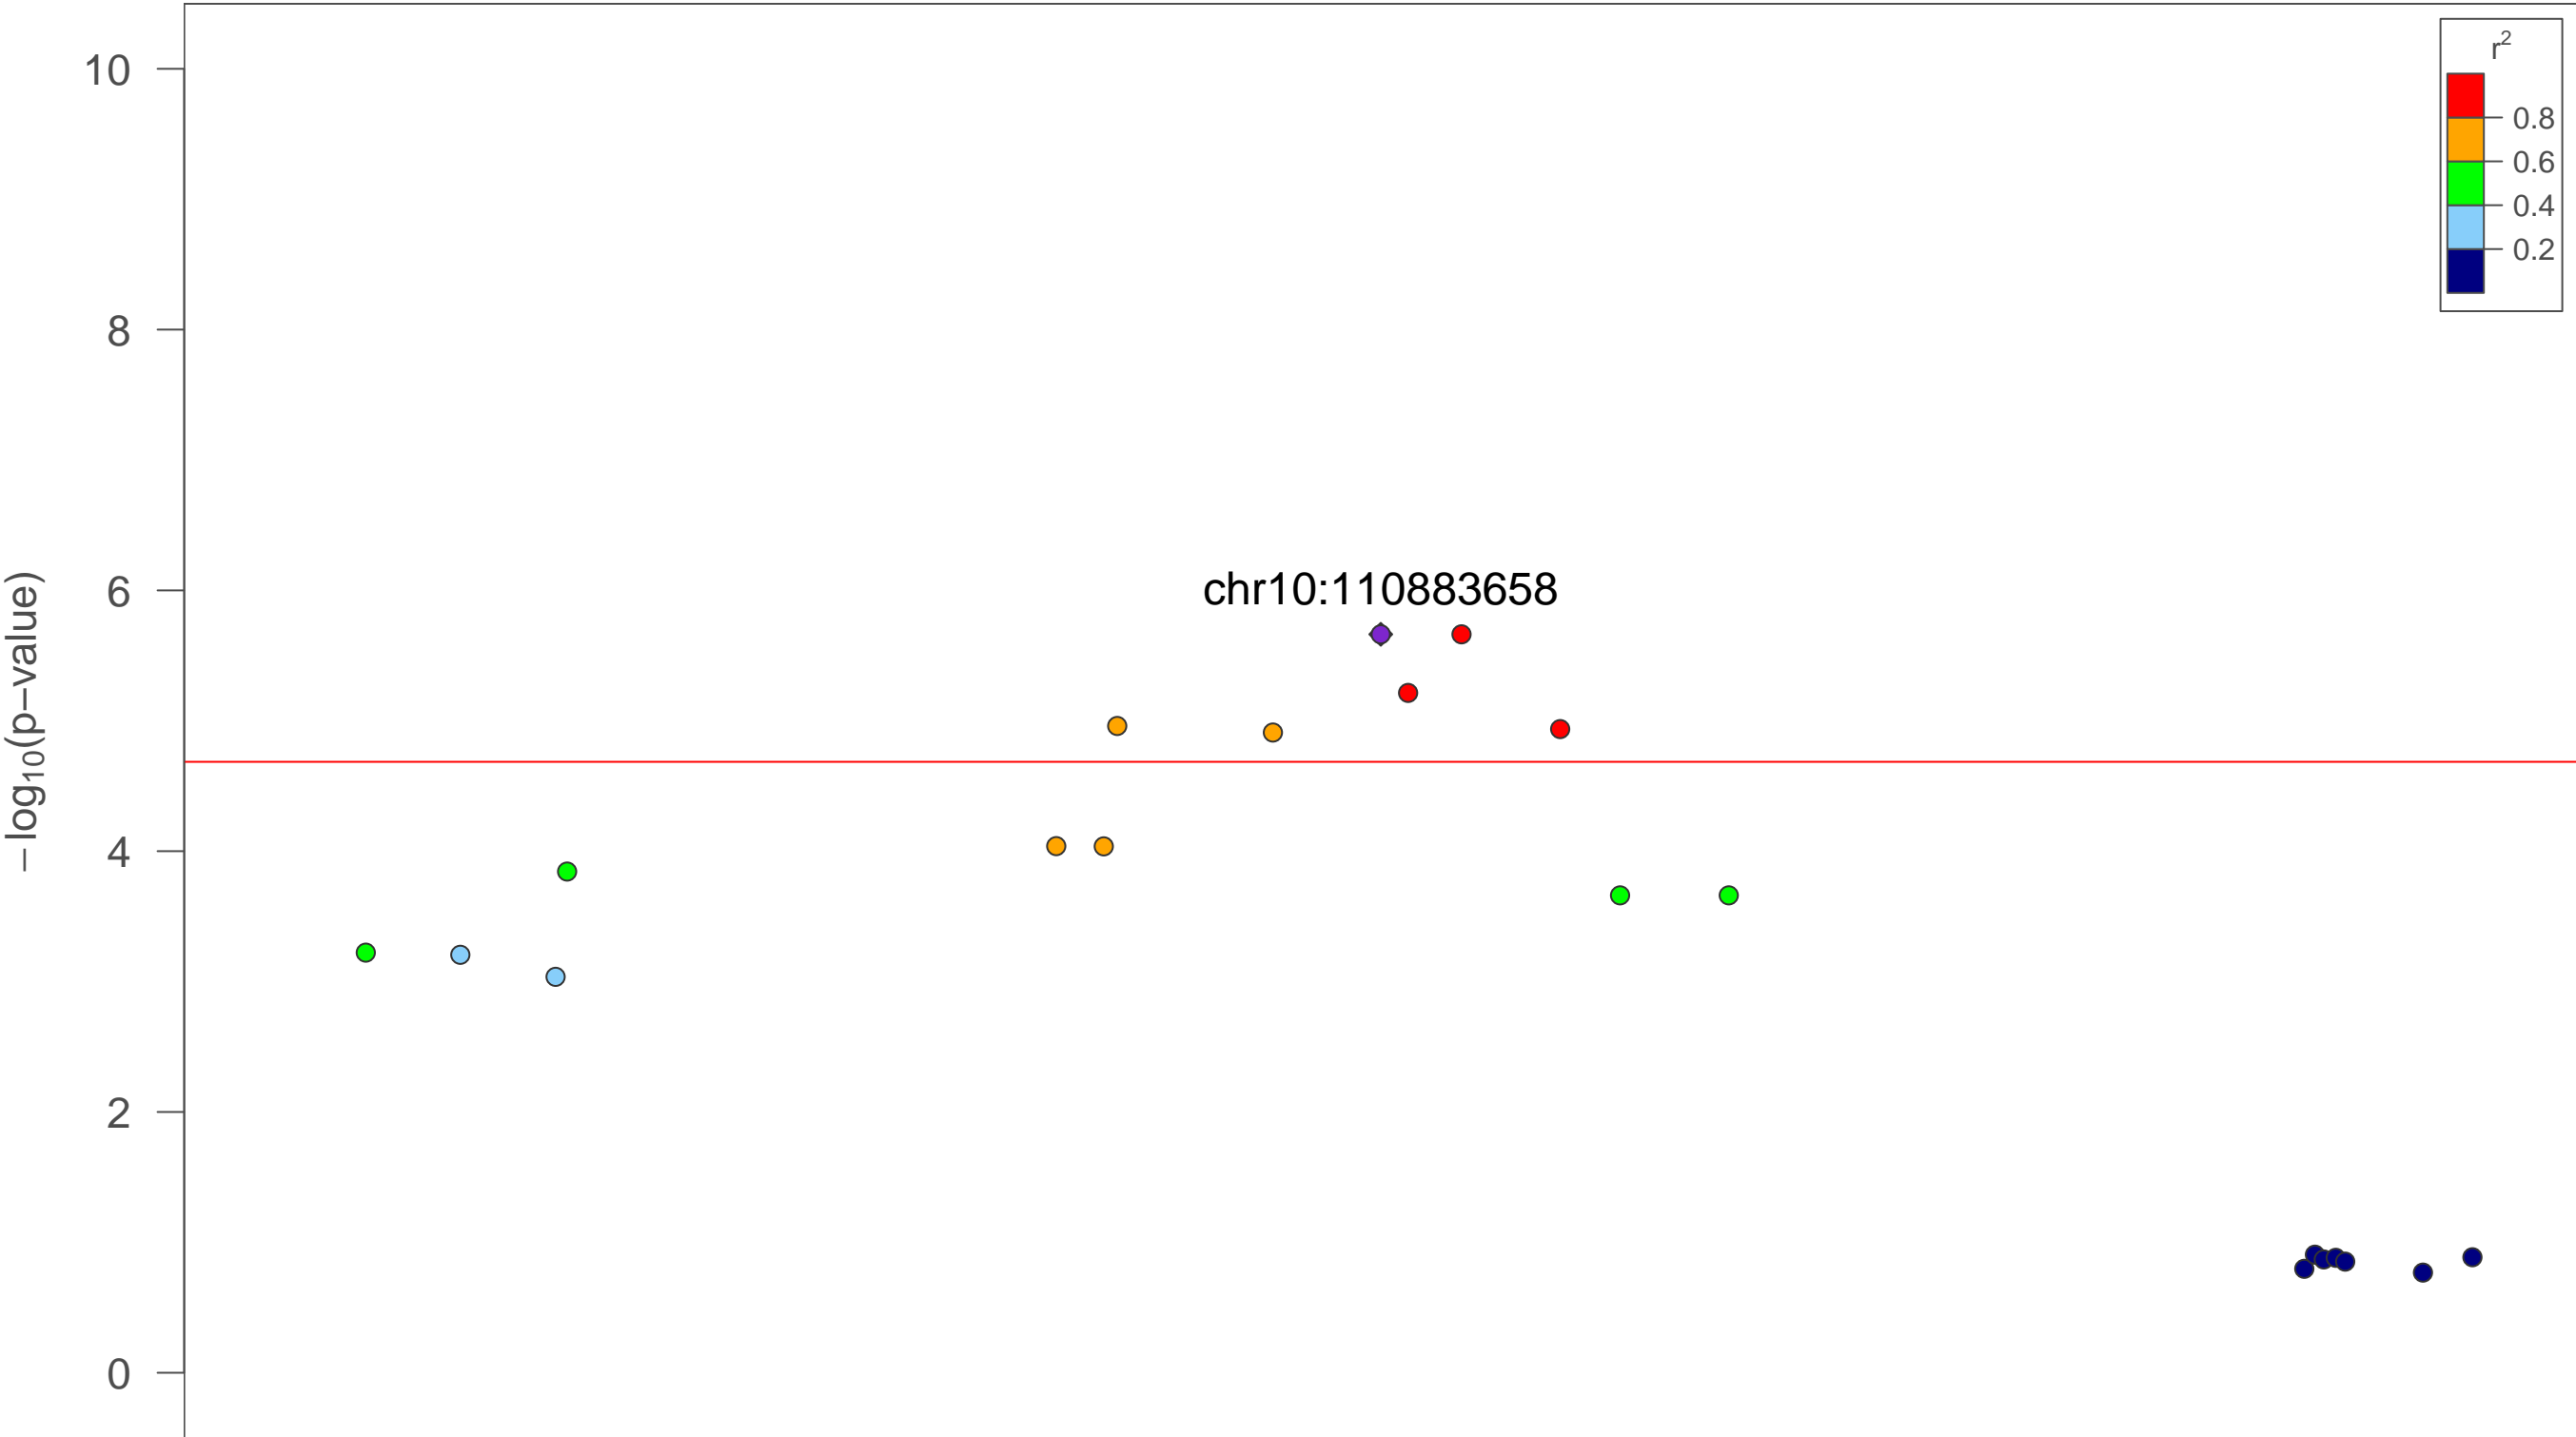

Credible Set

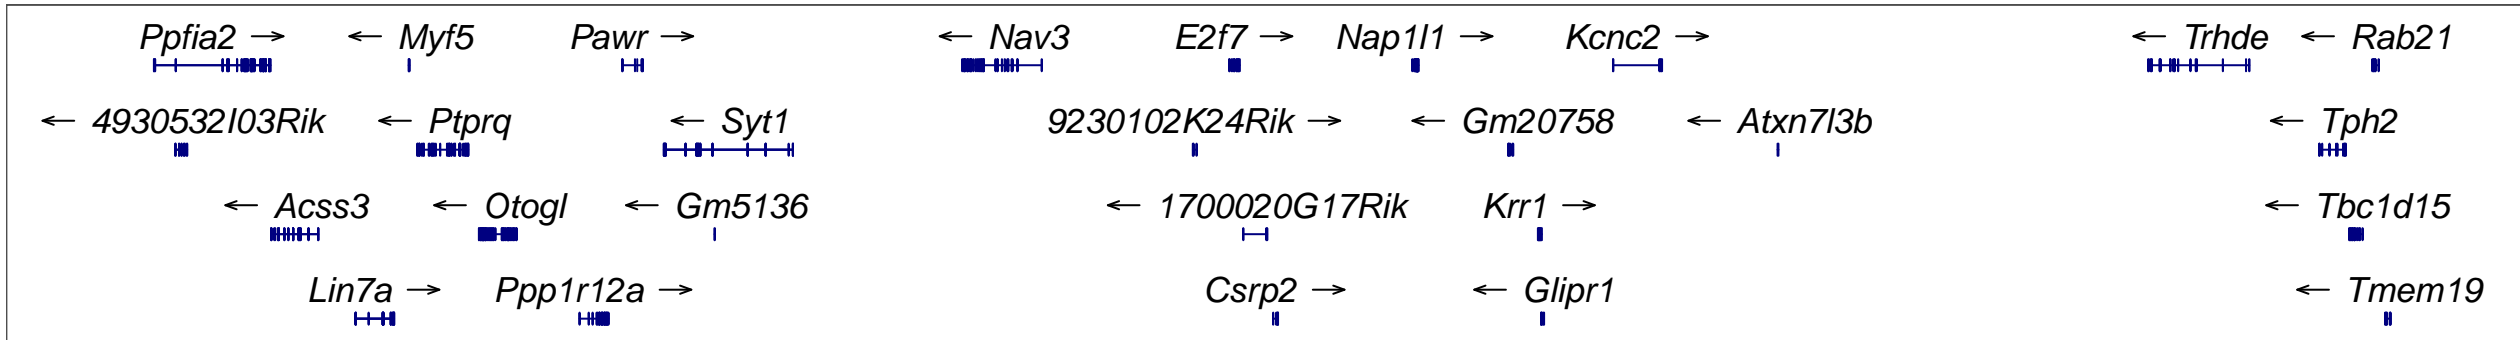

17 genes omitted

date: Thu Oct 25 16:54:40 2018

build: F34Array

display range: chr10:105883658–115883658 [105883658–115883658]

hilite range: 0 – 0 [ 0 – 0 ]

reference SNP: chr10:110883658

number of SNPs plotted: 22

min P-value: 2.17E–6 [chr10:110883658]

max P-value: 1.7E–1 [chr10:115238015]

omitted Genes: Myf6, Gm29685, Zdhhc17

omitted Genes: Osbpl8, Bbs10, Gm5176

omitted Genes: Phlda1, 4933440J02Rik, Glipr1l1

omitted Genes: Glipr1l2, Caps2, 1700010J16Rik

omitted Genes: Thap2, Zfc3h1, Lgr5

omitted Genes: A930009A15Rik, Tspan8



Fine-mapping Regions

| snp             | chr | pos (Mb) | pp         | group        | color  |
|-----------------|-----|----------|------------|--------------|--------|
| chr10:110883658 | 10  | 110.8837 | 0.38877202 | Credible Set | purple |
| chr10:110997815 | 10  | 110.9978 | 0.14413964 | Credible Set | purple |
| chr10:111221007 | 10  | 111.2210 | 0.38877202 | Credible Set | purple |
| chr10:111633214 | 10  | 111.6332 | 0.07831632 | Credible Set | purple |

# F34 Array, iron content in spleen z score

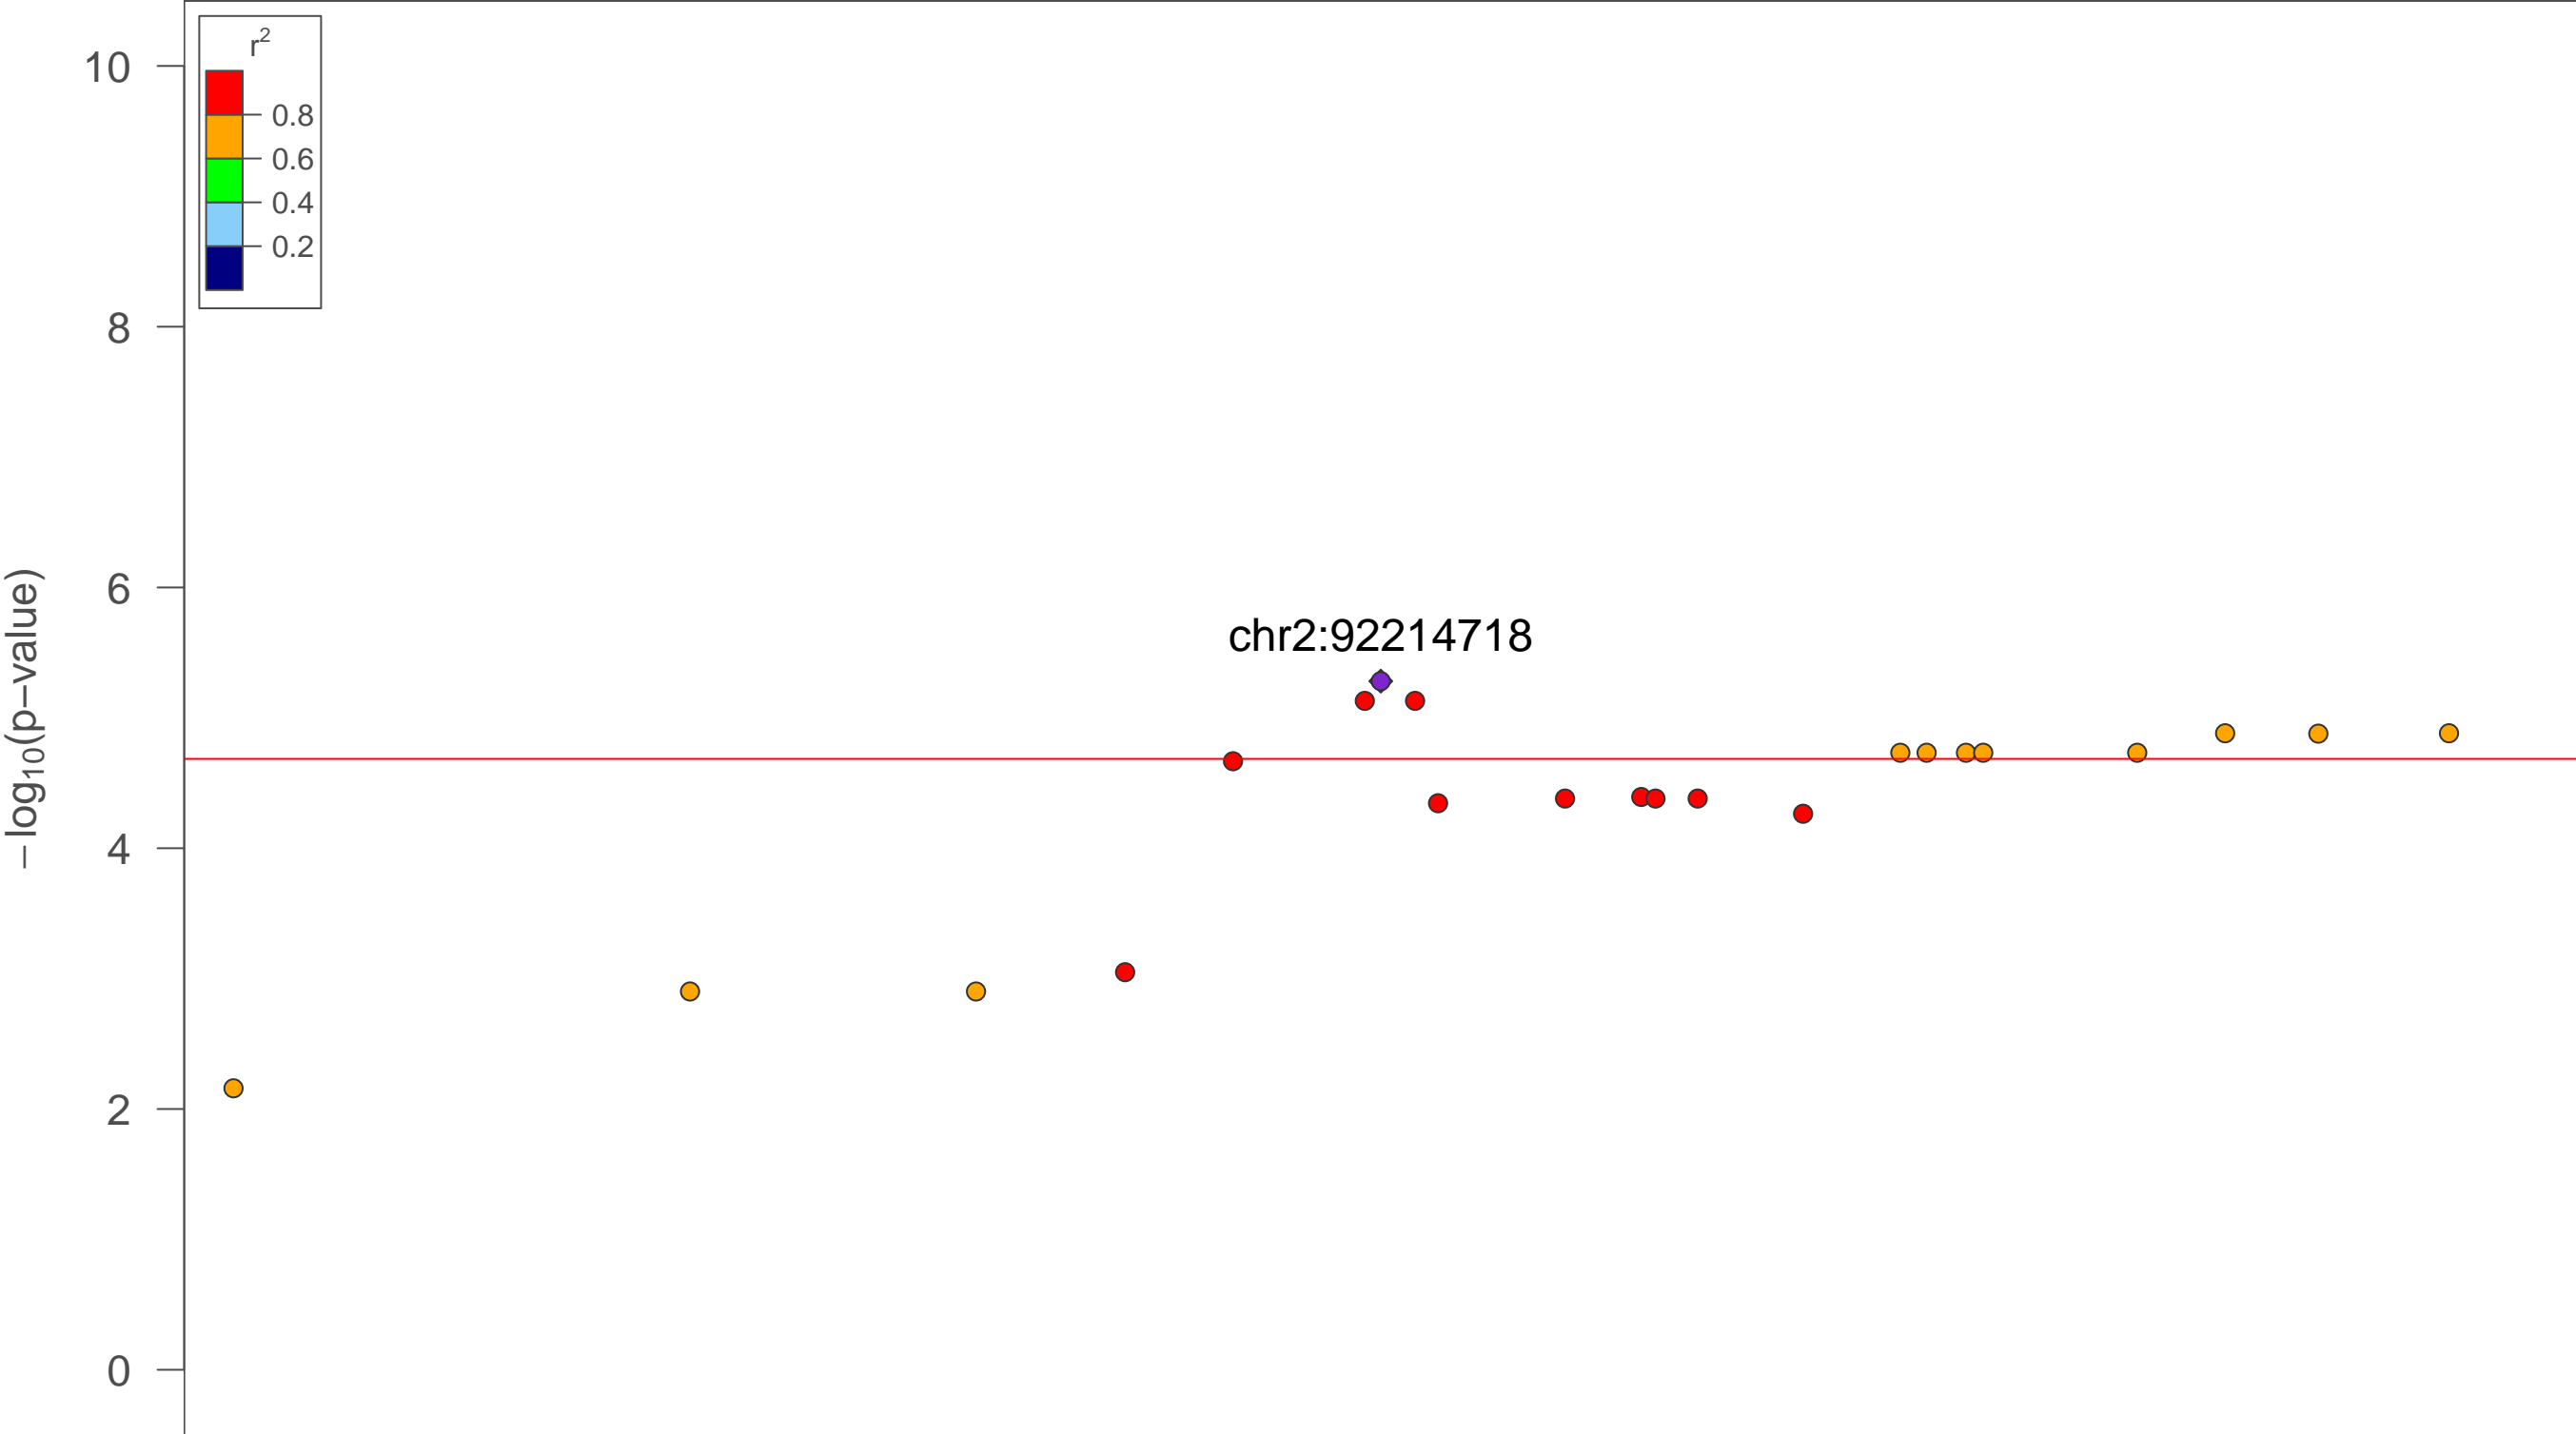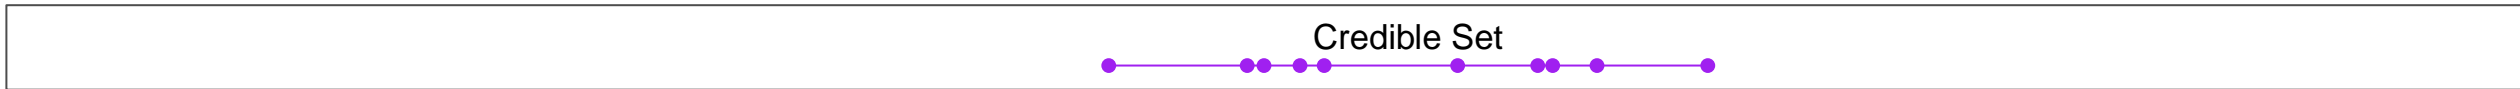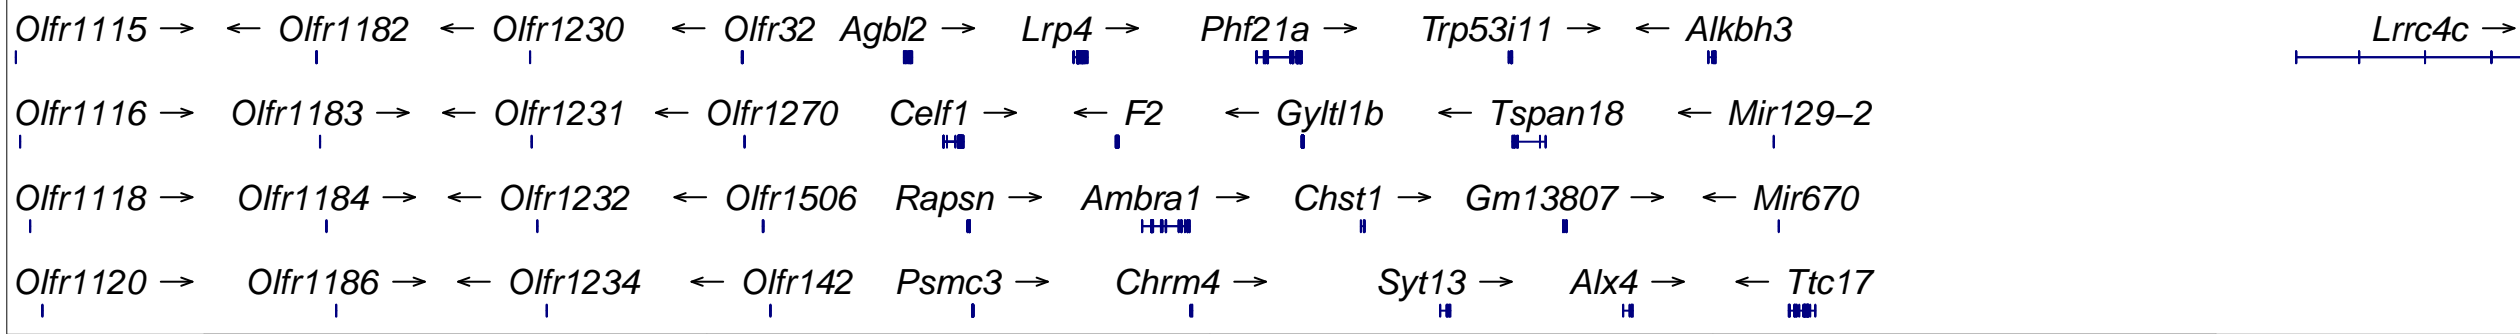

172 genes  
omitted

date: Thu Oct 25 16:55:26 2018

build: F34Array

display range: chr2:87214718–97214718 [87214718–97214718]

hilite range: 0 – 0 [ 0 – 0 ]

reference SNP: chr2:92214718

number of SNPs plotted: 23

min P-value: 5.23E–6 [chr2:92214718]

max P-value: 6.94E–3 [chr2:87421495]

omitted Genes: Olfr1121, Olfr1122, Olfr1123

omitted Genes: Olfr1124, Olfr1126, Pramel7

omitted Genes: Pramel6, Olfr153, Olfr1128

omitted Genes: Olfr1129, Olfr1130, Olfr1131

omitted Genes: Olfr1132, Olfr1133, Olfr1134

omitted Genes: Olfr1135, Olfr1136, Olfr1137

omitted Genes: Olfr1138, Olfr1140, Olfr1141

omitted Genes: Olfr152, Olfr1143, Olfr1145

omitted Genes: Olfr1148, Olfr1151, Olfr1152

omitted Genes: Olfr1153, Olfr1154, Olfr1155

omitted Genes: Olfr1156, Olfr1157, Olfr74

omitted Genes: Olfr1158, Olfr1160, Olfr1161

omitted Genes: Olfr73, Olfr1162, Olfr1163

omitted Genes: Olfr1164, Olfr1166, Olfr1167

omitted Genes: Olfr1168, Olfr1170, Olfr1173

omitted Genes: Olfr1176, Olfr1178, Olfr1179

omitted Genes: Olfr1180, Olfr1181, Olfr1188

omitted Genes: Olfr1189, Olfr1193, Olfr1195

omitted Genes: Olfr1196, Olfr1197, Olfr1198

omitted Genes: Olfr1199, Olfr1200, Olfr1201

omitted Genes: Olfr1202, Olfr1205, Olfr1204

omitted Genes: Olfr1206, Olfr1208, Olfr1209

omitted Genes: Olfr1211, Olfr1212, Olfr1213

omitted Genes: Olfr1214, Olfr1215, Olfr1216

omitted Genes: Olfr1217, Olfr1218, Olfr1219

omitted Genes: Olfr1220, Olfr1221, Olfr1222

omitted Genes: Olfr1223, Olfr1225, Olfr1226

omitted Genes: Olfr1228, Olfr1229, Olfr1233

omitted Genes: Olfr1238, Olfr1239, Olfr1240

omitted Genes: Olfr1241, Olfr1242, Olfr1243

omitted Genes: Olfr1245, Olfr1246, Olfr1247

omitted Genes: Olfr1248, Olfr1249, Olfr1250

Make more plots at <http://csg.sph.umich.edu/locuszoom/>

Fine-mapping Regions

| snp           | chr | pos (Mb) | pp         | group        | color  |
|---------------|-----|----------|------------|--------------|--------|
| chr2:91597466 | 2   | 91.59747 | 0.07416765 | Credible Set | purple |
| chr2:92147975 | 2   | 92.14798 | 0.20518626 | Credible Set | purple |
| chr2:92214718 | 2   | 92.21472 | 0.28617800 | Credible Set | purple |
| chr2:92357966 | 2   | 92.35797 | 0.20518626 | Credible Set | purple |
| chr2:92454070 | 2   | 92.45407 | 0.03664601 | Credible Set | purple |
| chr2:92984633 | 2   | 92.98463 | 0.03965422 | Credible Set | purple |
| chr2:93303076 | 2   | 93.30308 | 0.04070338 | Credible Set | purple |
| chr2:93362468 | 2   | 93.36247 | 0.03965422 | Credible Set | purple |
| chr2:93538754 | 2   | 93.53875 | 0.03965422 | Credible Set | purple |
| chr2:93979130 | 2   | 93.97913 | 0.03074496 | Credible Set | purple |

F34 Array, iron content in spleen z score

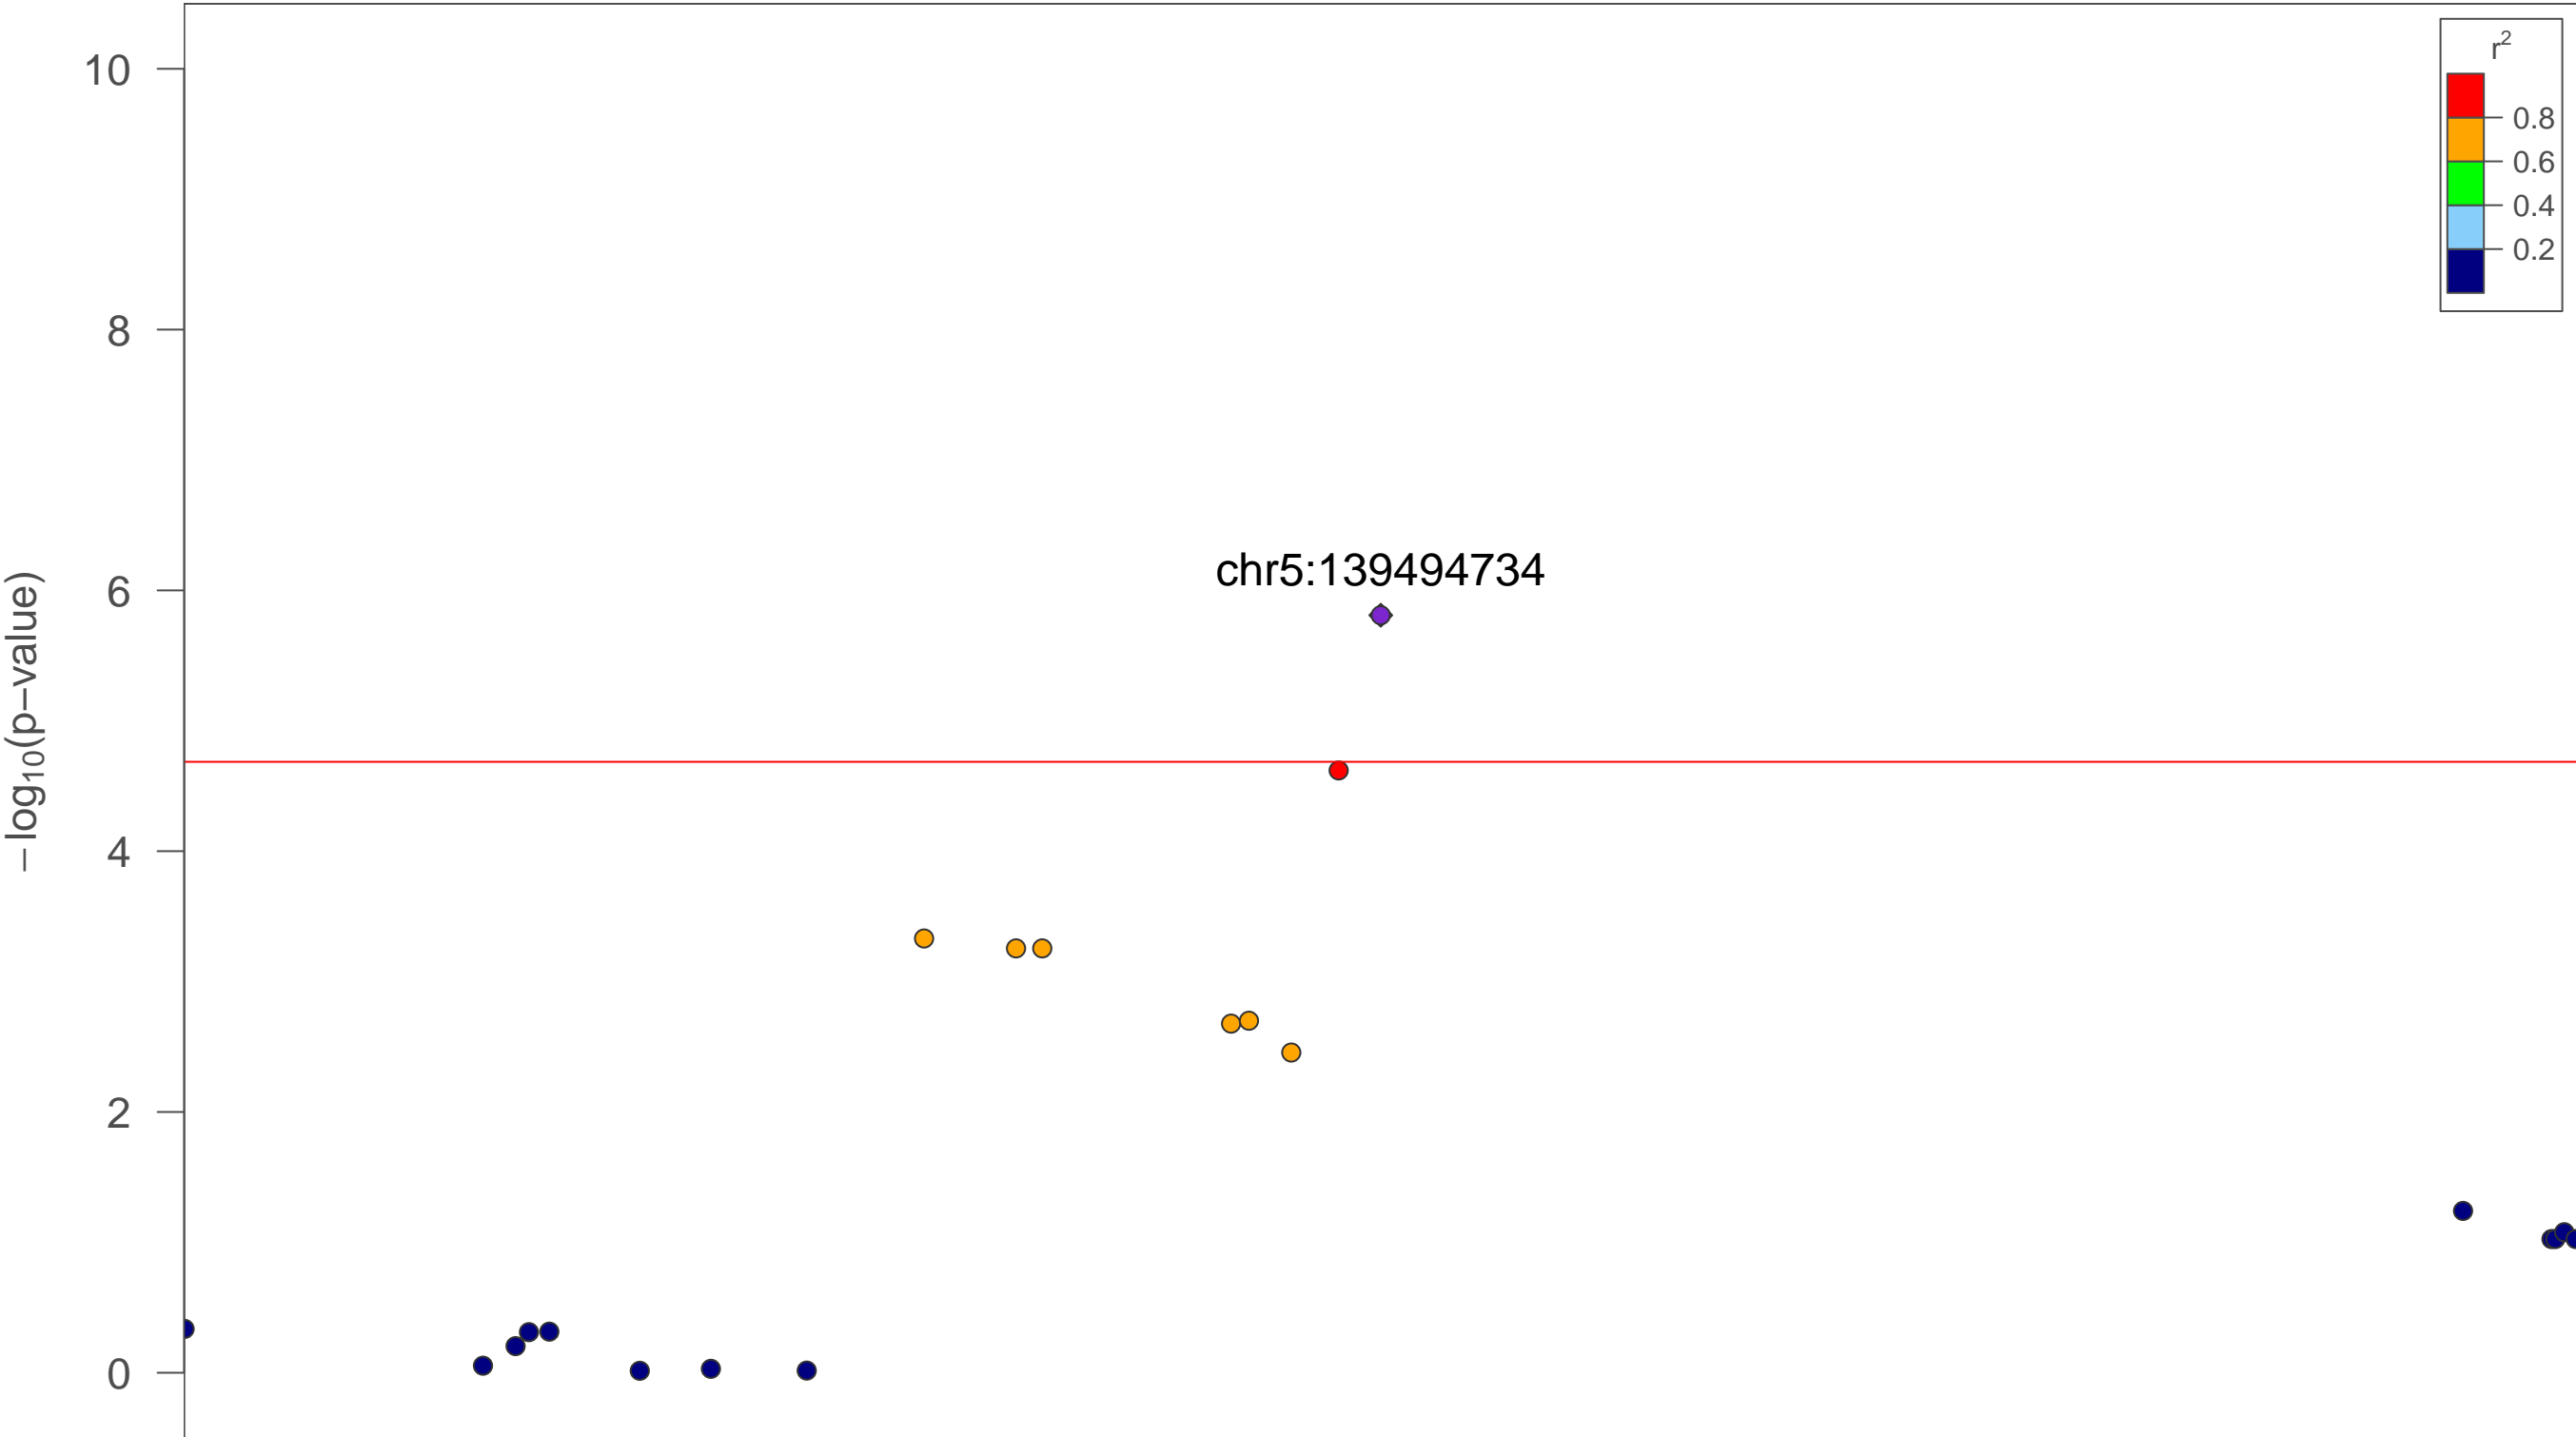

Credible Set

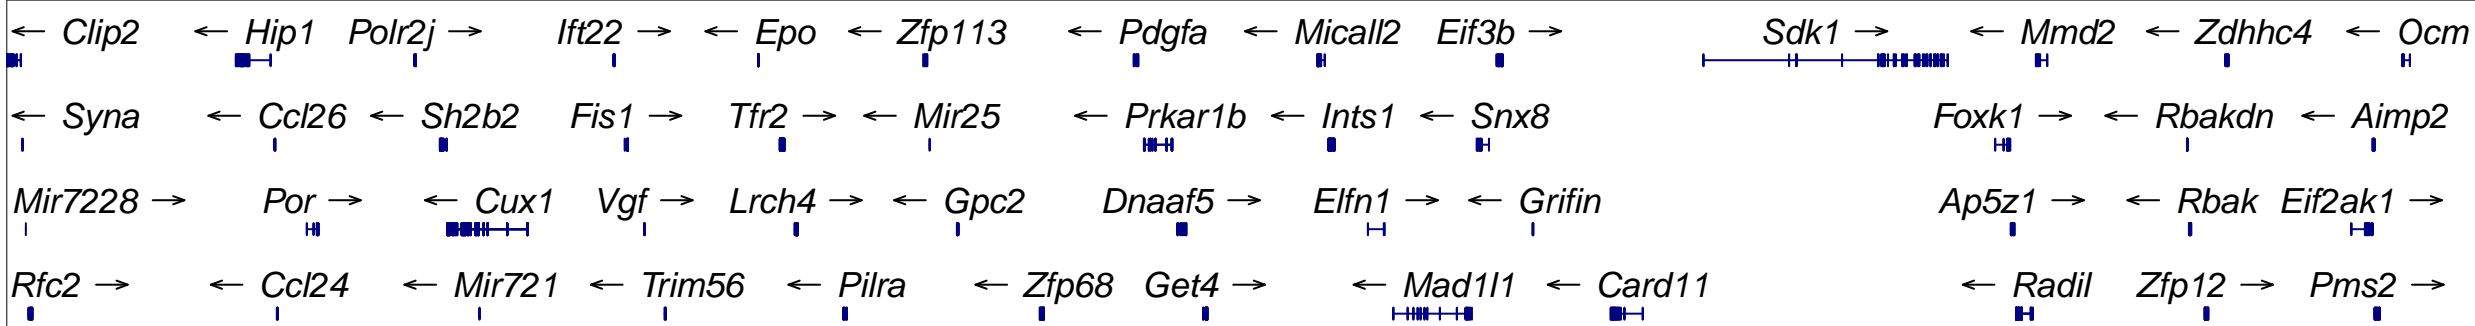

167 genes  
omitted

date: Thu Oct 25 16:55:37 2018

build: F34Array

display range: chr5:134494734–144494734 [134494734–144494734]

hilite range: 0 – 0 [ 0 – 0 ]

reference SNP: chr5:139494734

number of SNPs plotted: 22

min P-value: 1.55E–6 [chr5:139494734]

max P-value: 9.65E–1 [chr5:136398923]

omitted Genes: Lat2, Eif4h, Limk1

omitted Genes: Eln, Wbscr28, Cldn13

omitted Genes: Wbscr27, Cldn4, Cldn3

omitted Genes: Wbscr25, Abhd11, Abhd11os

omitted Genes: Stx1a, Wbscr22, Dnajc30

omitted Genes: Vps37d, Mlxipl, Tbl2

omitted Genes: Bcl7b, Baz1b, Fzd9

omitted Genes: Fkbp6, Trim50, Nsun5

omitted Genes: Pom121, Mir7033, Rhbdd2

omitted Genes: Tmem120a, Mir7034, Styxl1

omitted Genes: Mdh2, Srrm3, Hspb1

omitted Genes: Ywhag, Ssc4d, Zp3

omitted Genes: Dtx2, Upk3b, Upk3bl

omitted Genes: Rasa4, Mir7035, Lrwd1

omitted Genes: Alkbh4, Orai2, Prkrip1

omitted Genes: Myl10, Col26a1, 4933404O12Rik

omitted Genes: Cldn15, Znhit1, Plod3

omitted Genes: Mir702, Ap1s1, Serpine1

omitted Genes: Ache, Mir8116, Ufsp1

omitted Genes: Srrt, Mir7036, Trip6

omitted Genes: Slc12a9, Ephb4, Zan

omitted Genes: Pop7, Gigyf1, Gnb2

omitted Genes: Mir6418, Actl6b, Mospd3

omitted Genes: Pcolce, Fbxo24, Gm20605

omitted Genes: Sap25, Irs3, Agfg2

omitted Genes: Nyap1, Tsc22d4, Ppp1r35

omitted Genes: Mepce, Zcwpw1, Pilrb1

omitted Genes: Pilrb2, Cyp3a13, Gjc3

omitted Genes: Azgp1, Smok3a, Smok3b

omitted Genes: Smok3c, Zkscan1, Zscan21

omitted Genes: Cops6, Mcm7, Mir93

omitted Genes: Mir106b, An4m1, Taf6

Make more plots at <http://csg.sph.umich.edu/locuszoom/>

Fine-mapping Regions

| snp            | chr | pos (Mb) | pp         | group        | color  |
|----------------|-----|----------|------------|--------------|--------|
| chr5:139318848 | 5   | 139.3188 | 0.06774966 | Credible Set | purple |
| chr5:139494734 | 5   | 139.4947 | 0.93225034 | Credible Set | purple |

# F34 Array, iron content in spleen z score

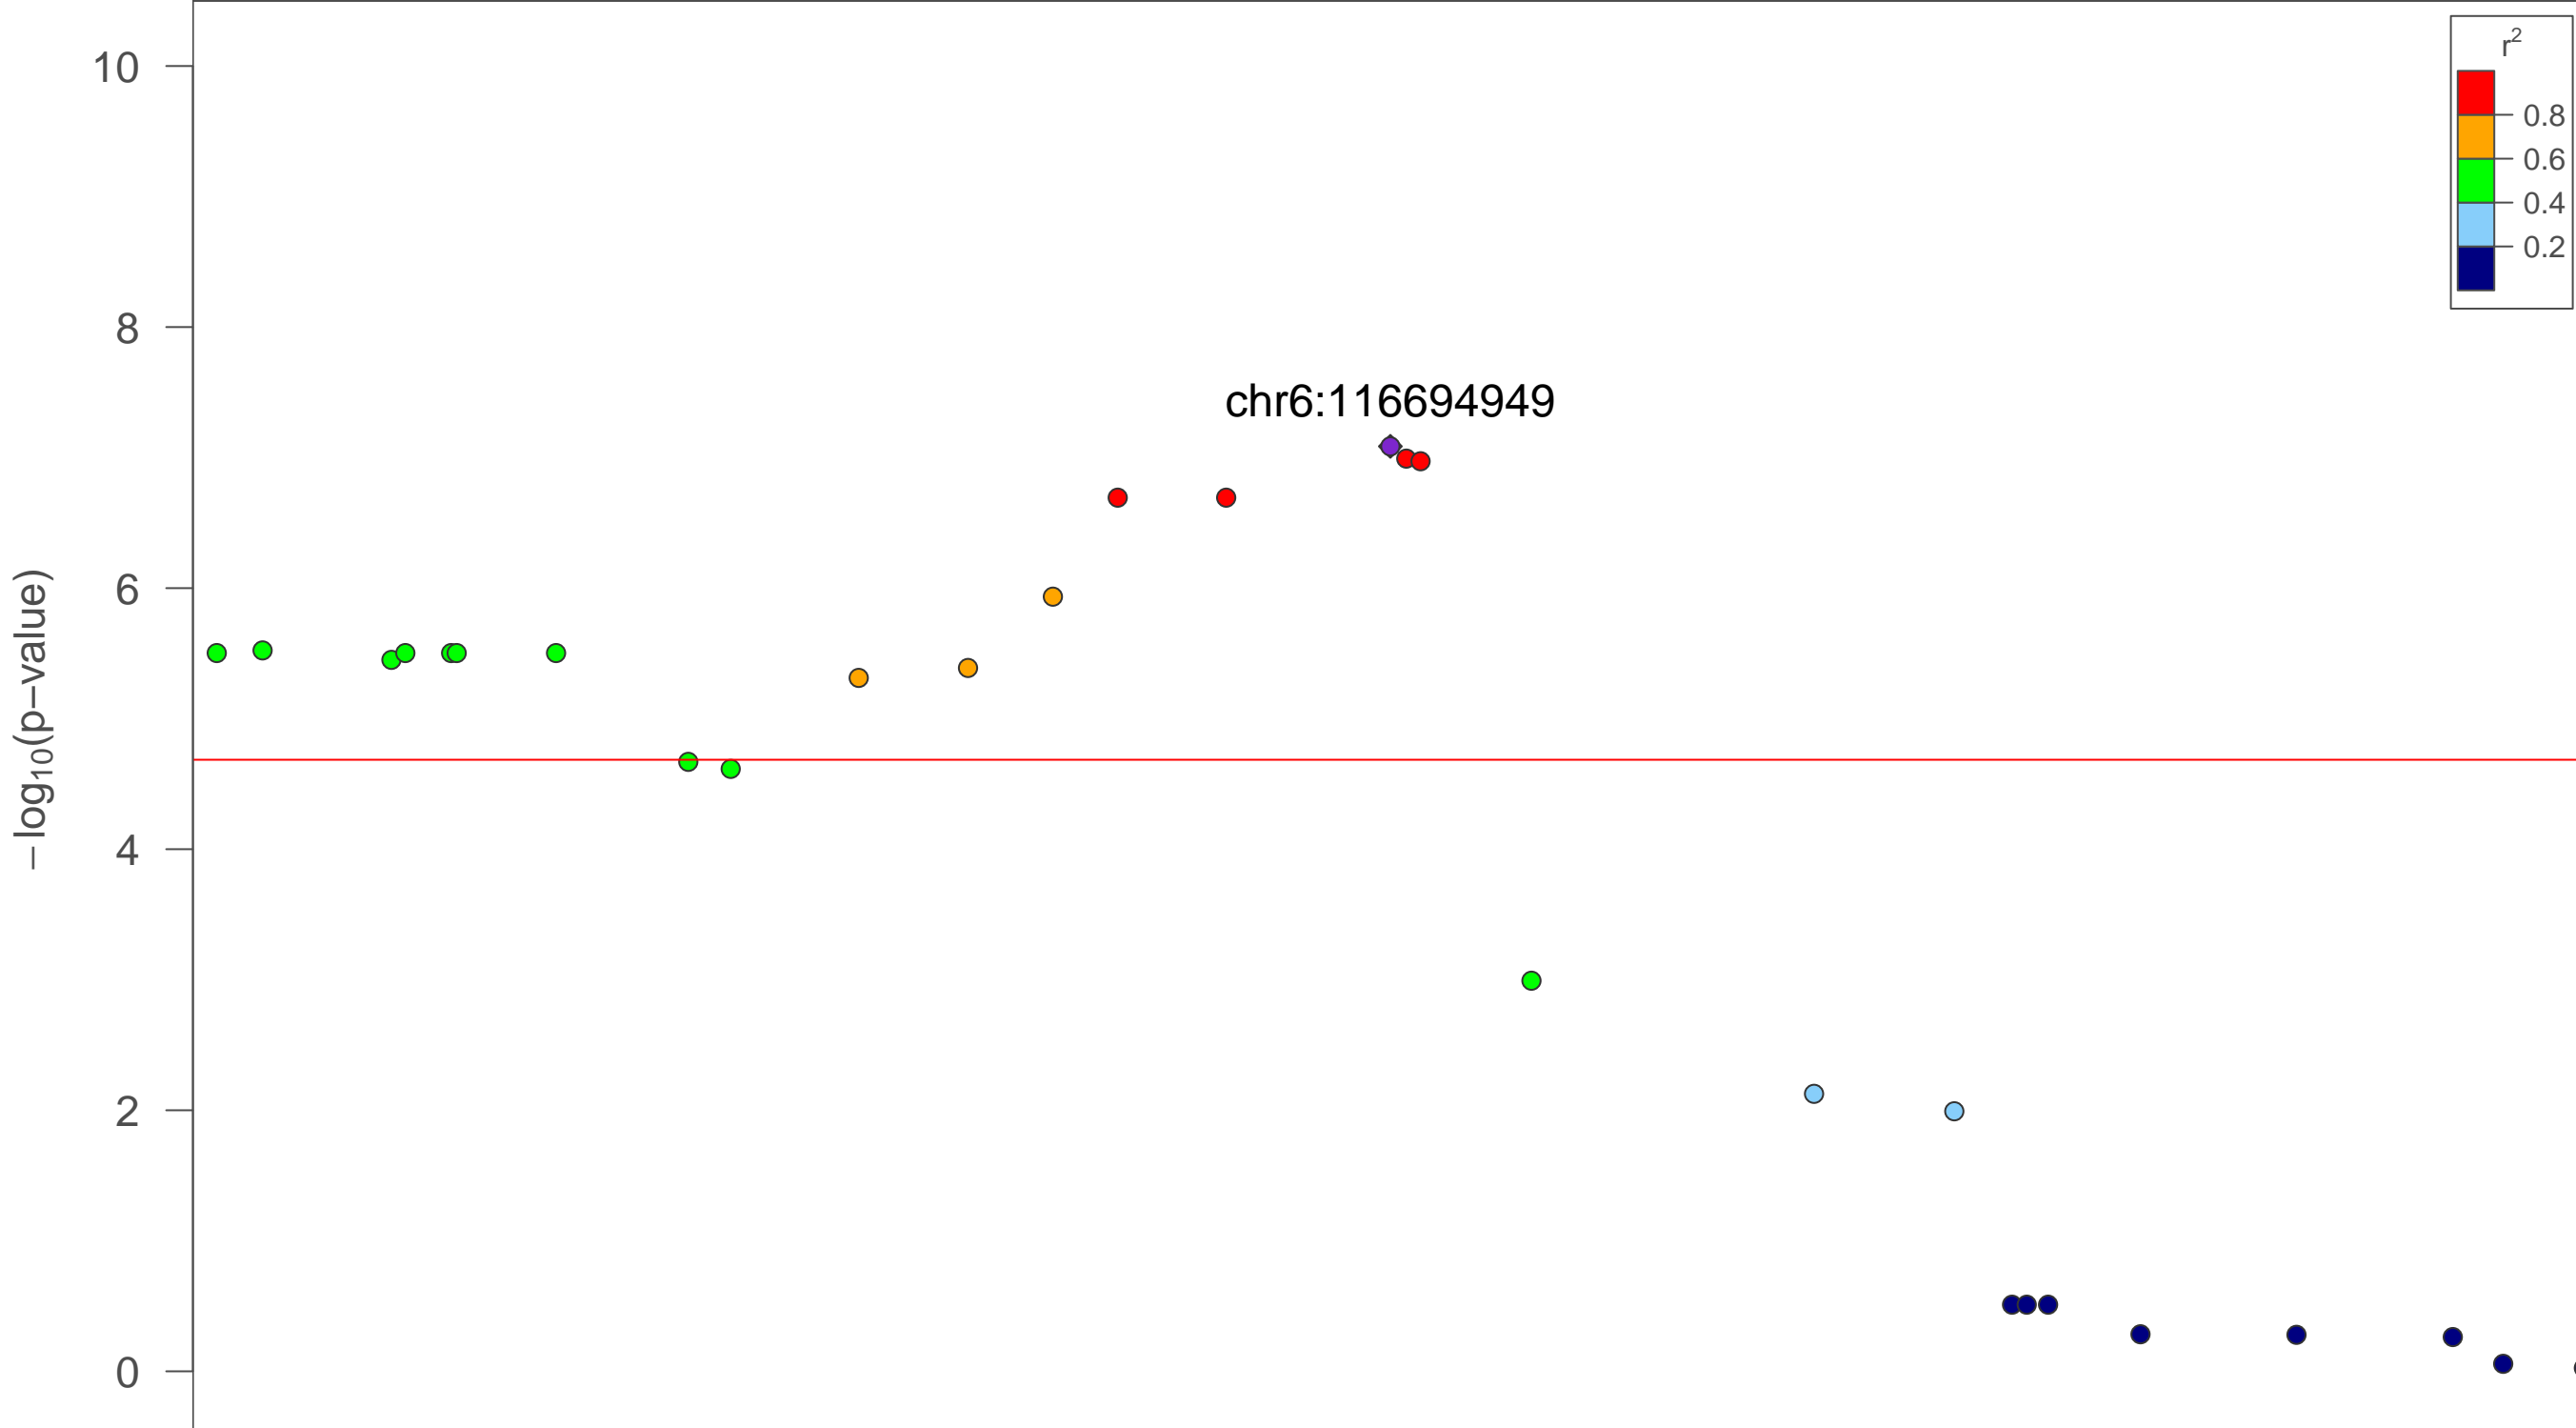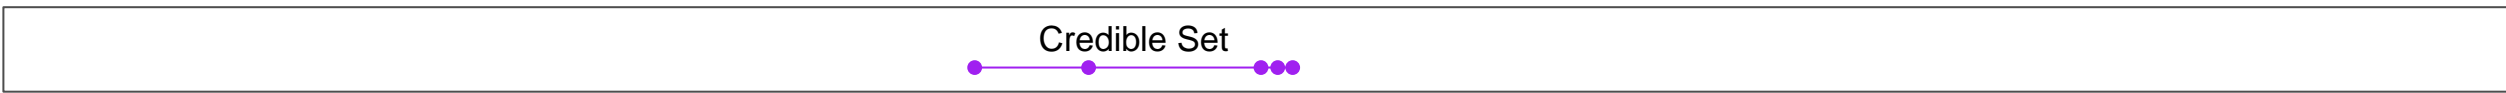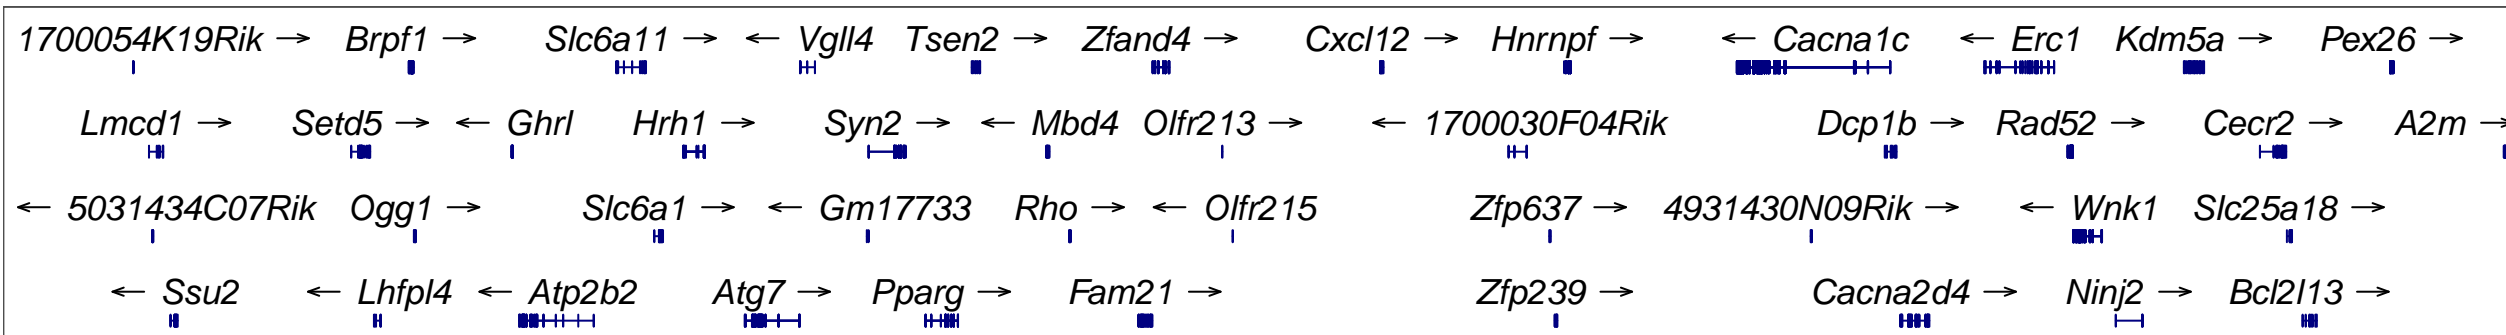

85 genes  
omitted



date: Thu Oct 25 16:55:45 2018  
build: F34Array  
display range: chr6:111694949–121694949 [111694949–121694949]  
hilite range: 0 – 0 [ 0 – 0 ]  
reference SNP: chr6:116694949  
number of SNPs plotted: 29  
min P-value: 8.2E–8 [chr6:116694949]  
max P-value: 9.43E–1 [chr6:121677793]  
omitted Genes: Cav3, Oxtr, Rad18  
omitted Genes: Srgap3, Thumpd3, Gt(ROSA)26Sor  
omitted Genes: Mtmr14, Cpne9, Camk1  
omitted Genes: Tada3, Arpc4, Tll3  
omitted Genes: Rpusd3, Cidec, Jagn1  
omitted Genes: Il17re, Il17rc, Creld1  
omitted Genes: Prrt3, Emc3, Fancd2  
omitted Genes: Fancd2os, Brk1, Vhl  
omitted Genes: Irak2, Tatdn2, Mir7042  
omitted Genes: Sec13, Tamm41, Timp4  
omitted Genes: Mkrn2os, Mkrn2, Raf1  
omitted Genes: Tmem40, Cand2, Mir7660  
omitted Genes: Rpl32, Snora7a, Efcab12  
omitted Genes: Ift122, H1foo, Plxnd1  
omitted Genes: Tmcc1, 9530062K07Rik, March8  
omitted Genes: Alox5, Olfr211, Olfr212  
omitted Genes: Olfr214, Zfp422, Rassf4  
omitted Genes: Mir7043, 8430408G22Rik, Tmem72  
omitted Genes: Fxyd4, Rasgef1a, Mir7044  
omitted Genes: Csgalnact2, Ret, 1700069P05Rik  
omitted Genes: Gm30498, Bms1, Zfp248  
omitted Genes: Zfp9, Ankrd26, Lrtm2  
omitted Genes: Adipor2, Wnt5b, Fbxl14  
omitted Genes: 3110021A11Rik, Mir706, B4galnt3  
omitted Genes: Ccdc77, Il17ra, Cecr6  
omitted Genes: Cecr5, 1700072O05Rik, Atp6v1e1  
omitted Genes: Bid, Mical3, Tuba8  
omitted Genes: Usp18, Slc6a13, Slc6a12  
omitted Genes: Iqsec3

Fine-mapping Regions

| snp            | chr | pos (Mb) | pp        | group        | color  |
|----------------|-----|----------|-----------|--------------|--------|
| chr6:115556641 | 6   | 115.5566 | 0.1218618 | Credible Set | purple |
| chr6:116009500 | 6   | 116.0095 | 0.1218618 | Credible Set | purple |
| chr6:116694949 | 6   | 116.6949 | 0.2923376 | Credible Set | purple |
| chr6:116761437 | 6   | 116.7614 | 0.2372379 | Credible Set | purple |
| chr6:116820969 | 6   | 116.8210 | 0.2267009 | Credible Set | purple |

F34 Array, iron content in spleen z score

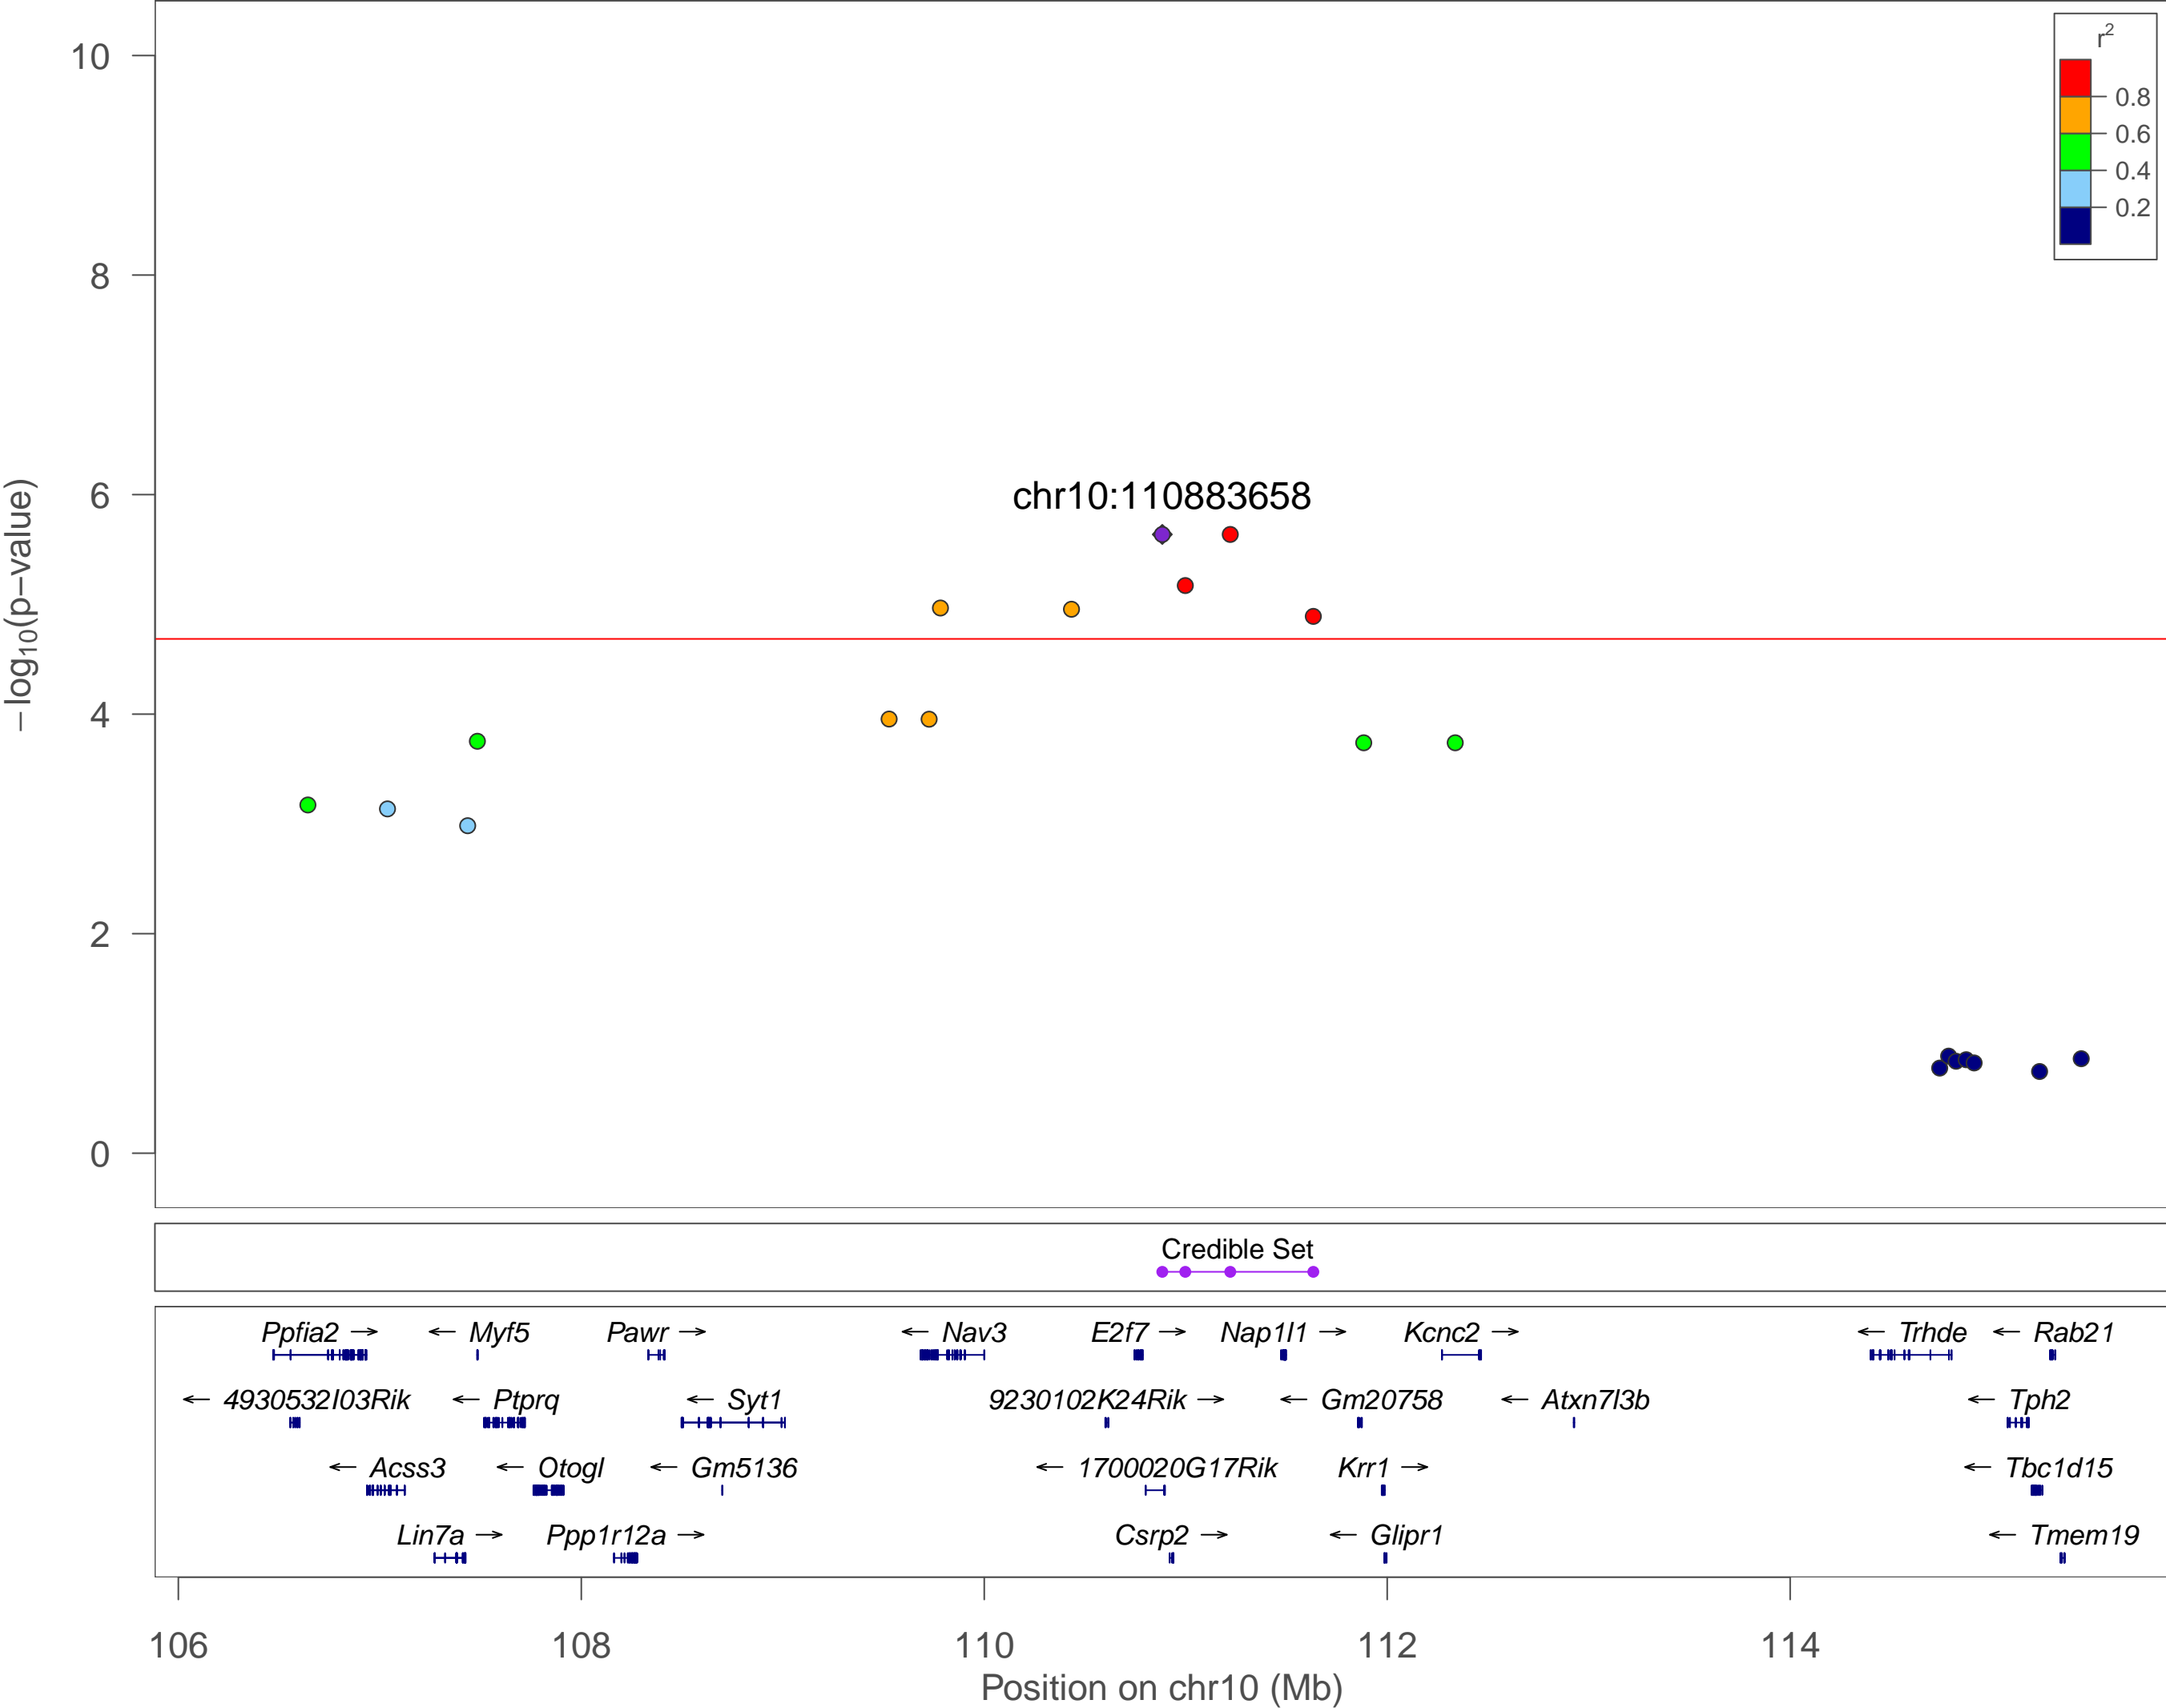

date: Thu Oct 25 16:55:16 2018  
build: F34Array  
display range: chr10:105883658–115883658 [105883658–115883658]  
hilite range: 0 – 0 [ 0 – 0 ]  
reference SNP: chr10:110883658  
number of SNPs plotted: 22  
min P-value: 2.31E–6 [chr10:110883658]  
max P-value: 1.8E–1 [chr10:115238015]  
omitted Genes: Myf6, Gm29685, Zdhhc17  
omitted Genes: Osbpl8, Bbs10, Gm5176  
omitted Genes: Phlda1, 4933440J02Rik, Glipr1l1  
omitted Genes: Glipr1l2, Caps2, 1700010J16Rik  
omitted Genes: Thap2, Zfc3h1, Lgr5  
omitted Genes: A930009A15Rik, Tspan8

Fine-mapping Regions

| snp             | chr | pos (Mb) | pp         | group        | color  |
|-----------------|-----|----------|------------|--------------|--------|
| chr10:110883658 | 10  | 110.8837 | 0.39202116 | Credible Set | purple |
| chr10:110997815 | 10  | 110.9978 | 0.14031854 | Credible Set | purple |
| chr10:111221007 | 10  | 111.2210 | 0.39202116 | Credible Set | purple |
| chr10:111633214 | 10  | 111.6332 | 0.07563914 | Credible Set | purple |

F34 Array, locomotor test day 1, total distance travelled in 30min (cm)

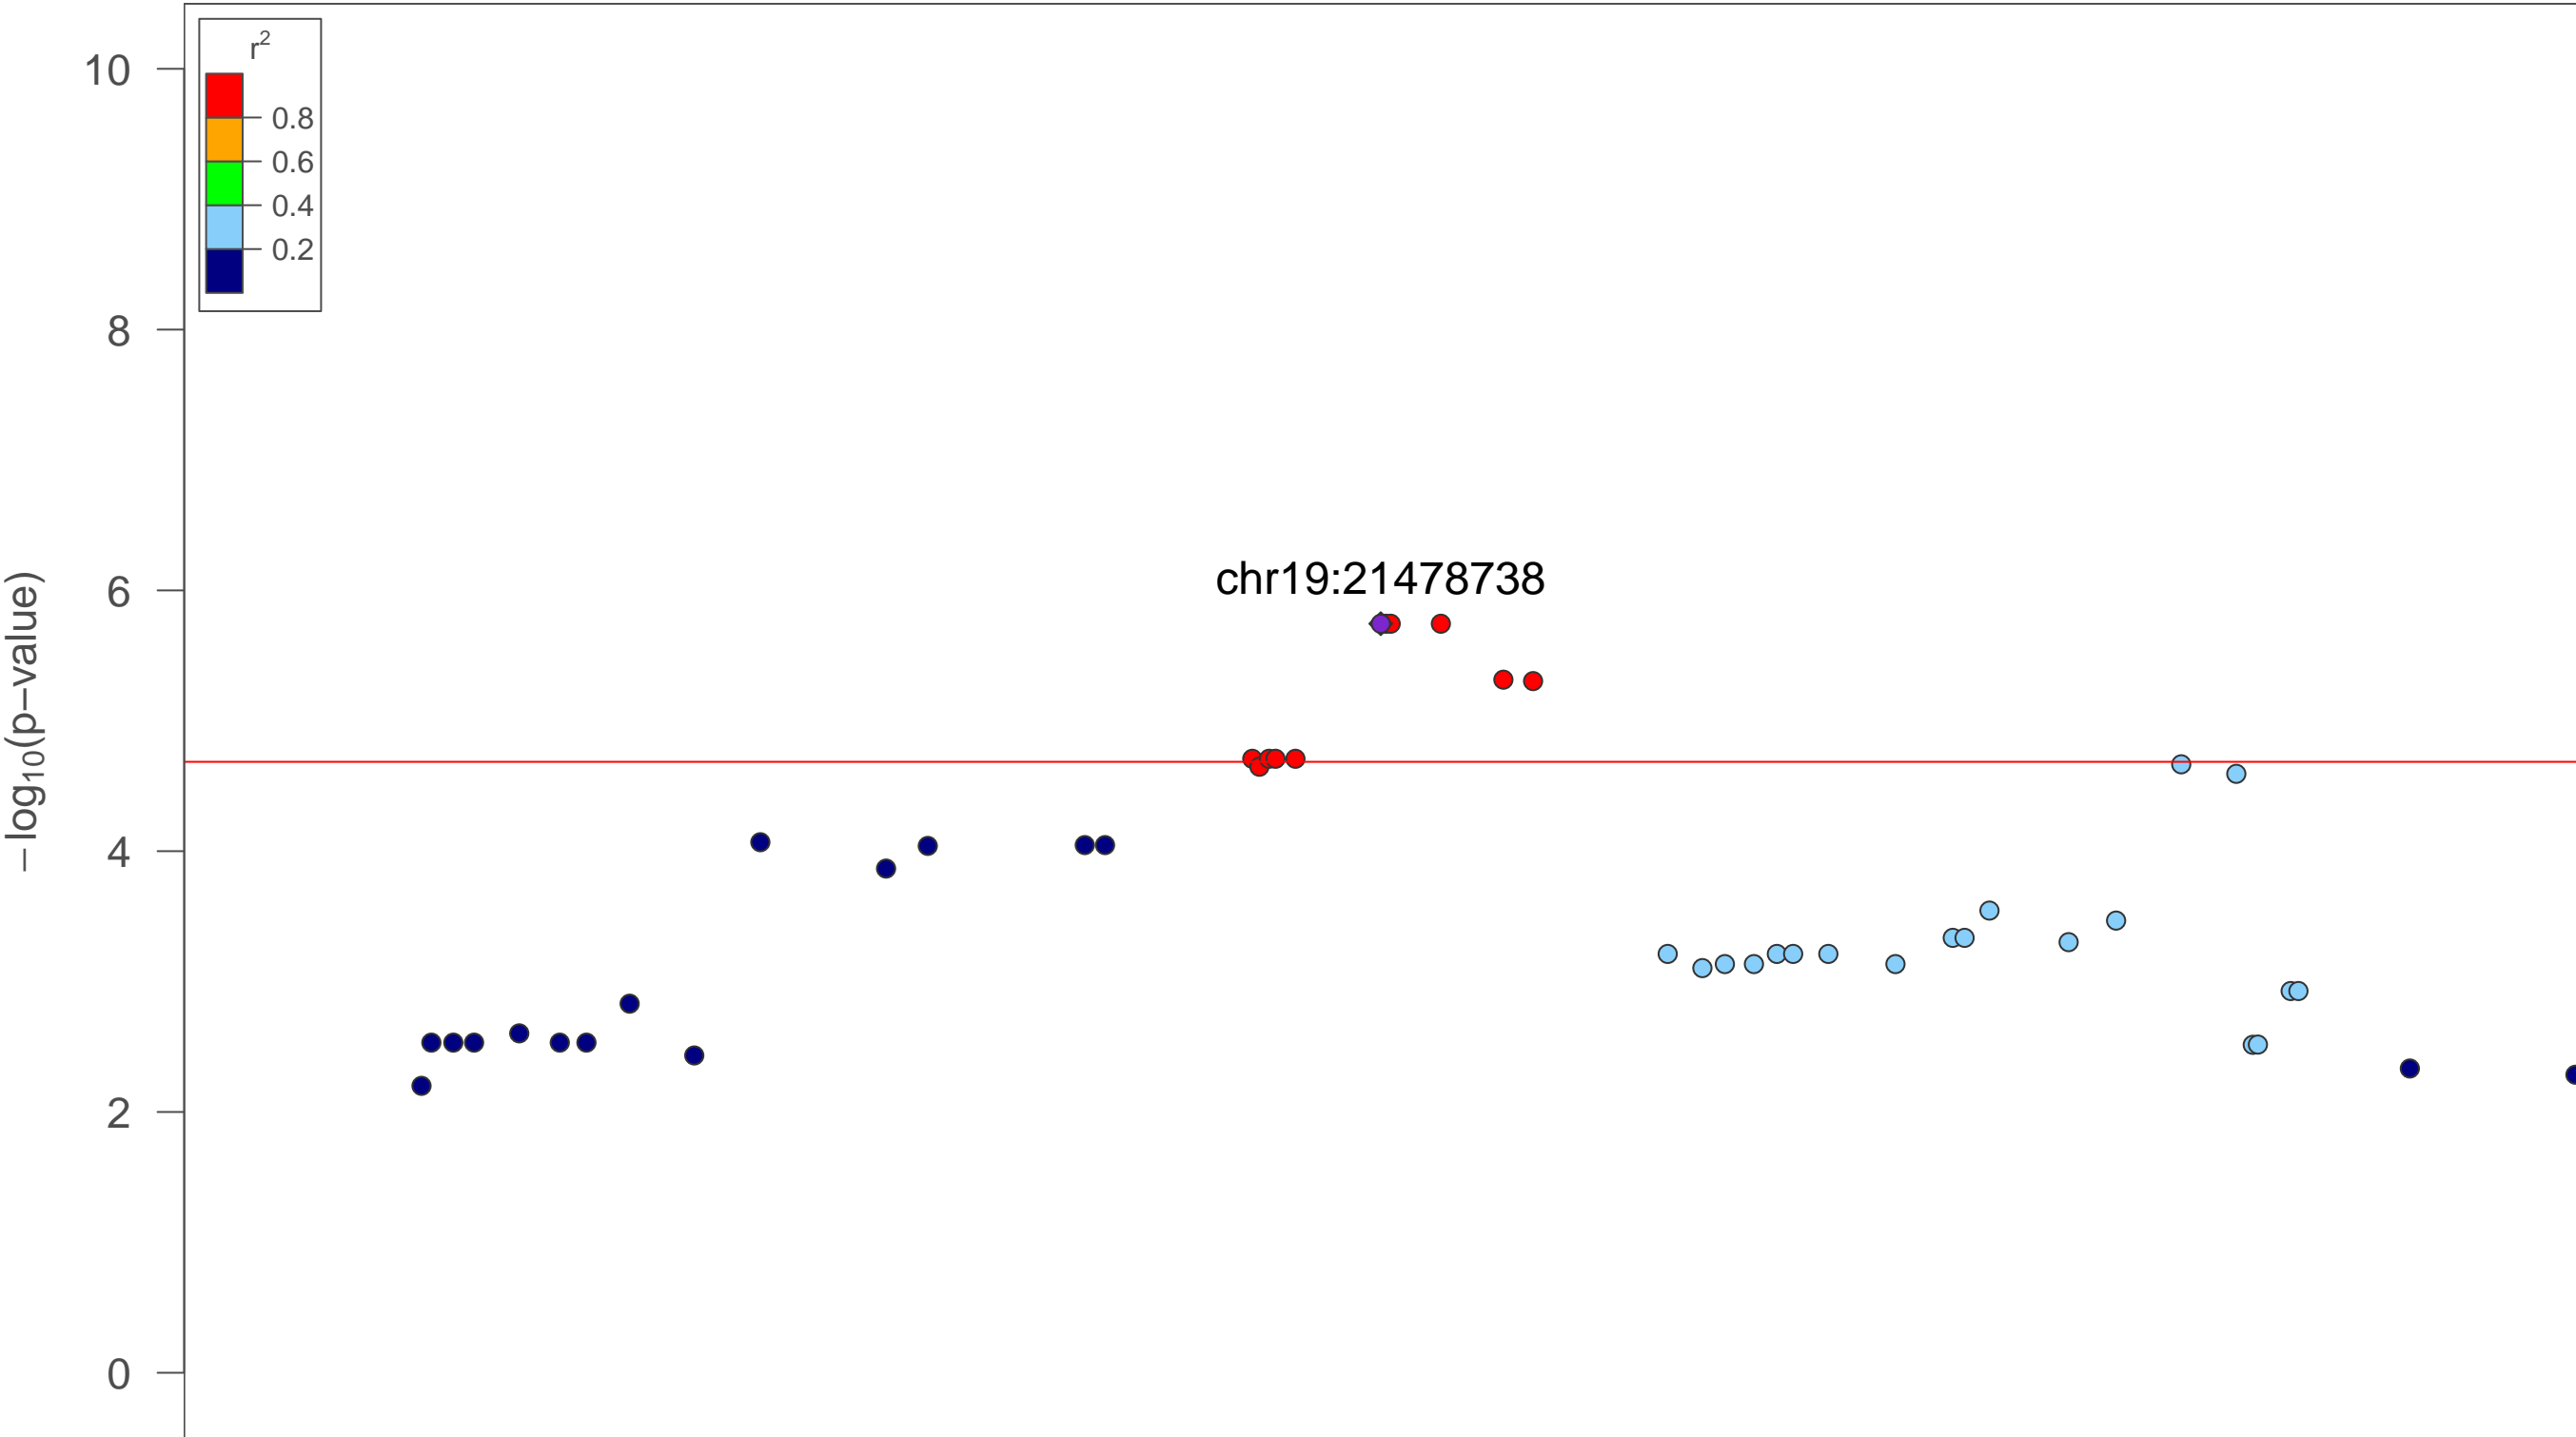

Credible Set

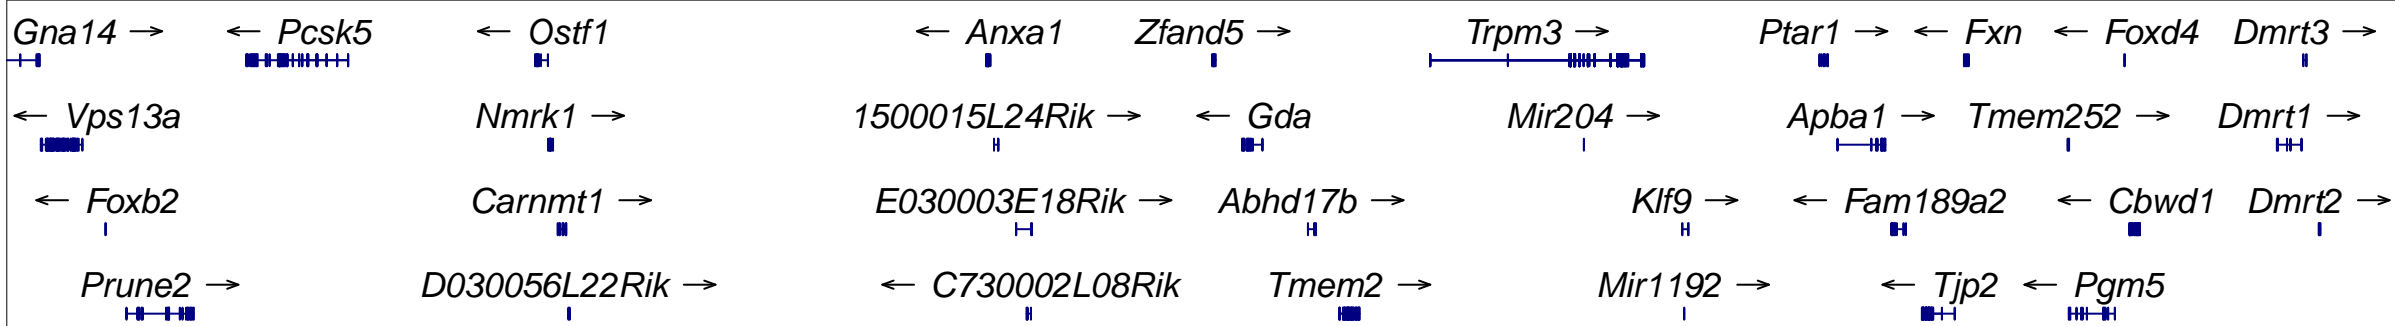

18 genes  
omitted

Position on chr19 (Mb)

date: Thu Oct 25 16:55:52 2018

build: F34Array

display range: chr19:16478738–26478738 [16478738–26478738]

hilite range: 0 – 0 [ 0 – 0 ]

reference SNP: chr19:21478738

number of SNPs plotted: 47

min P-value: 1.8E–6 [chr19:21478738]

max P-value: 6.3E–3 [chr19:17470922]

omitted Genes: Gcnt1, Rfk, Trpm6

omitted Genes: Rorb, Aldh1a1, Aldh1a7

omitted Genes: Tmc1, 4930554I06Rik, 1110059E24Rik

omitted Genes: Smc5, Mamdc2, 1700028P14Rik

omitted Genes: Pip5k1b, Fam122a, Mir3084–1

omitted Genes: Dock8, Kank1, 2610016A17Rik

Fine-mapping Regions

| snp            | chr | pos (Mb) | pp         | group        | color  |
|----------------|-----|----------|------------|--------------|--------|
| chr19:20941927 | 19  | 20.94193 | 0.01939458 | Credible Set | purple |
| chr19:20971640 | 19  | 20.97164 | 0.01696307 | Credible Set | purple |
| chr19:21011731 | 19  | 21.01173 | 0.01939458 | Credible Set | purple |
| chr19:21038918 | 19  | 21.03892 | 0.01939458 | Credible Set | purple |
| chr19:21122136 | 19  | 21.12214 | 0.01939458 | Credible Set | purple |
| chr19:21478738 | 19  | 21.47874 | 0.18998540 | Credible Set | purple |
| chr19:21500356 | 19  | 21.50036 | 0.18998540 | Credible Set | purple |
| chr19:21520189 | 19  | 21.52019 | 0.18998540 | Credible Set | purple |
| chr19:21729752 | 19  | 21.72975 | 0.18998540 | Credible Set | purple |
| chr19:21991002 | 19  | 21.99100 | 0.07362660 | Credible Set | purple |
| chr19:22115053 | 19  | 22.11505 | 0.07189041 | Credible Set | purple |



F34 Array, locomotor test day 2, total distance travelled in 30min (cm)

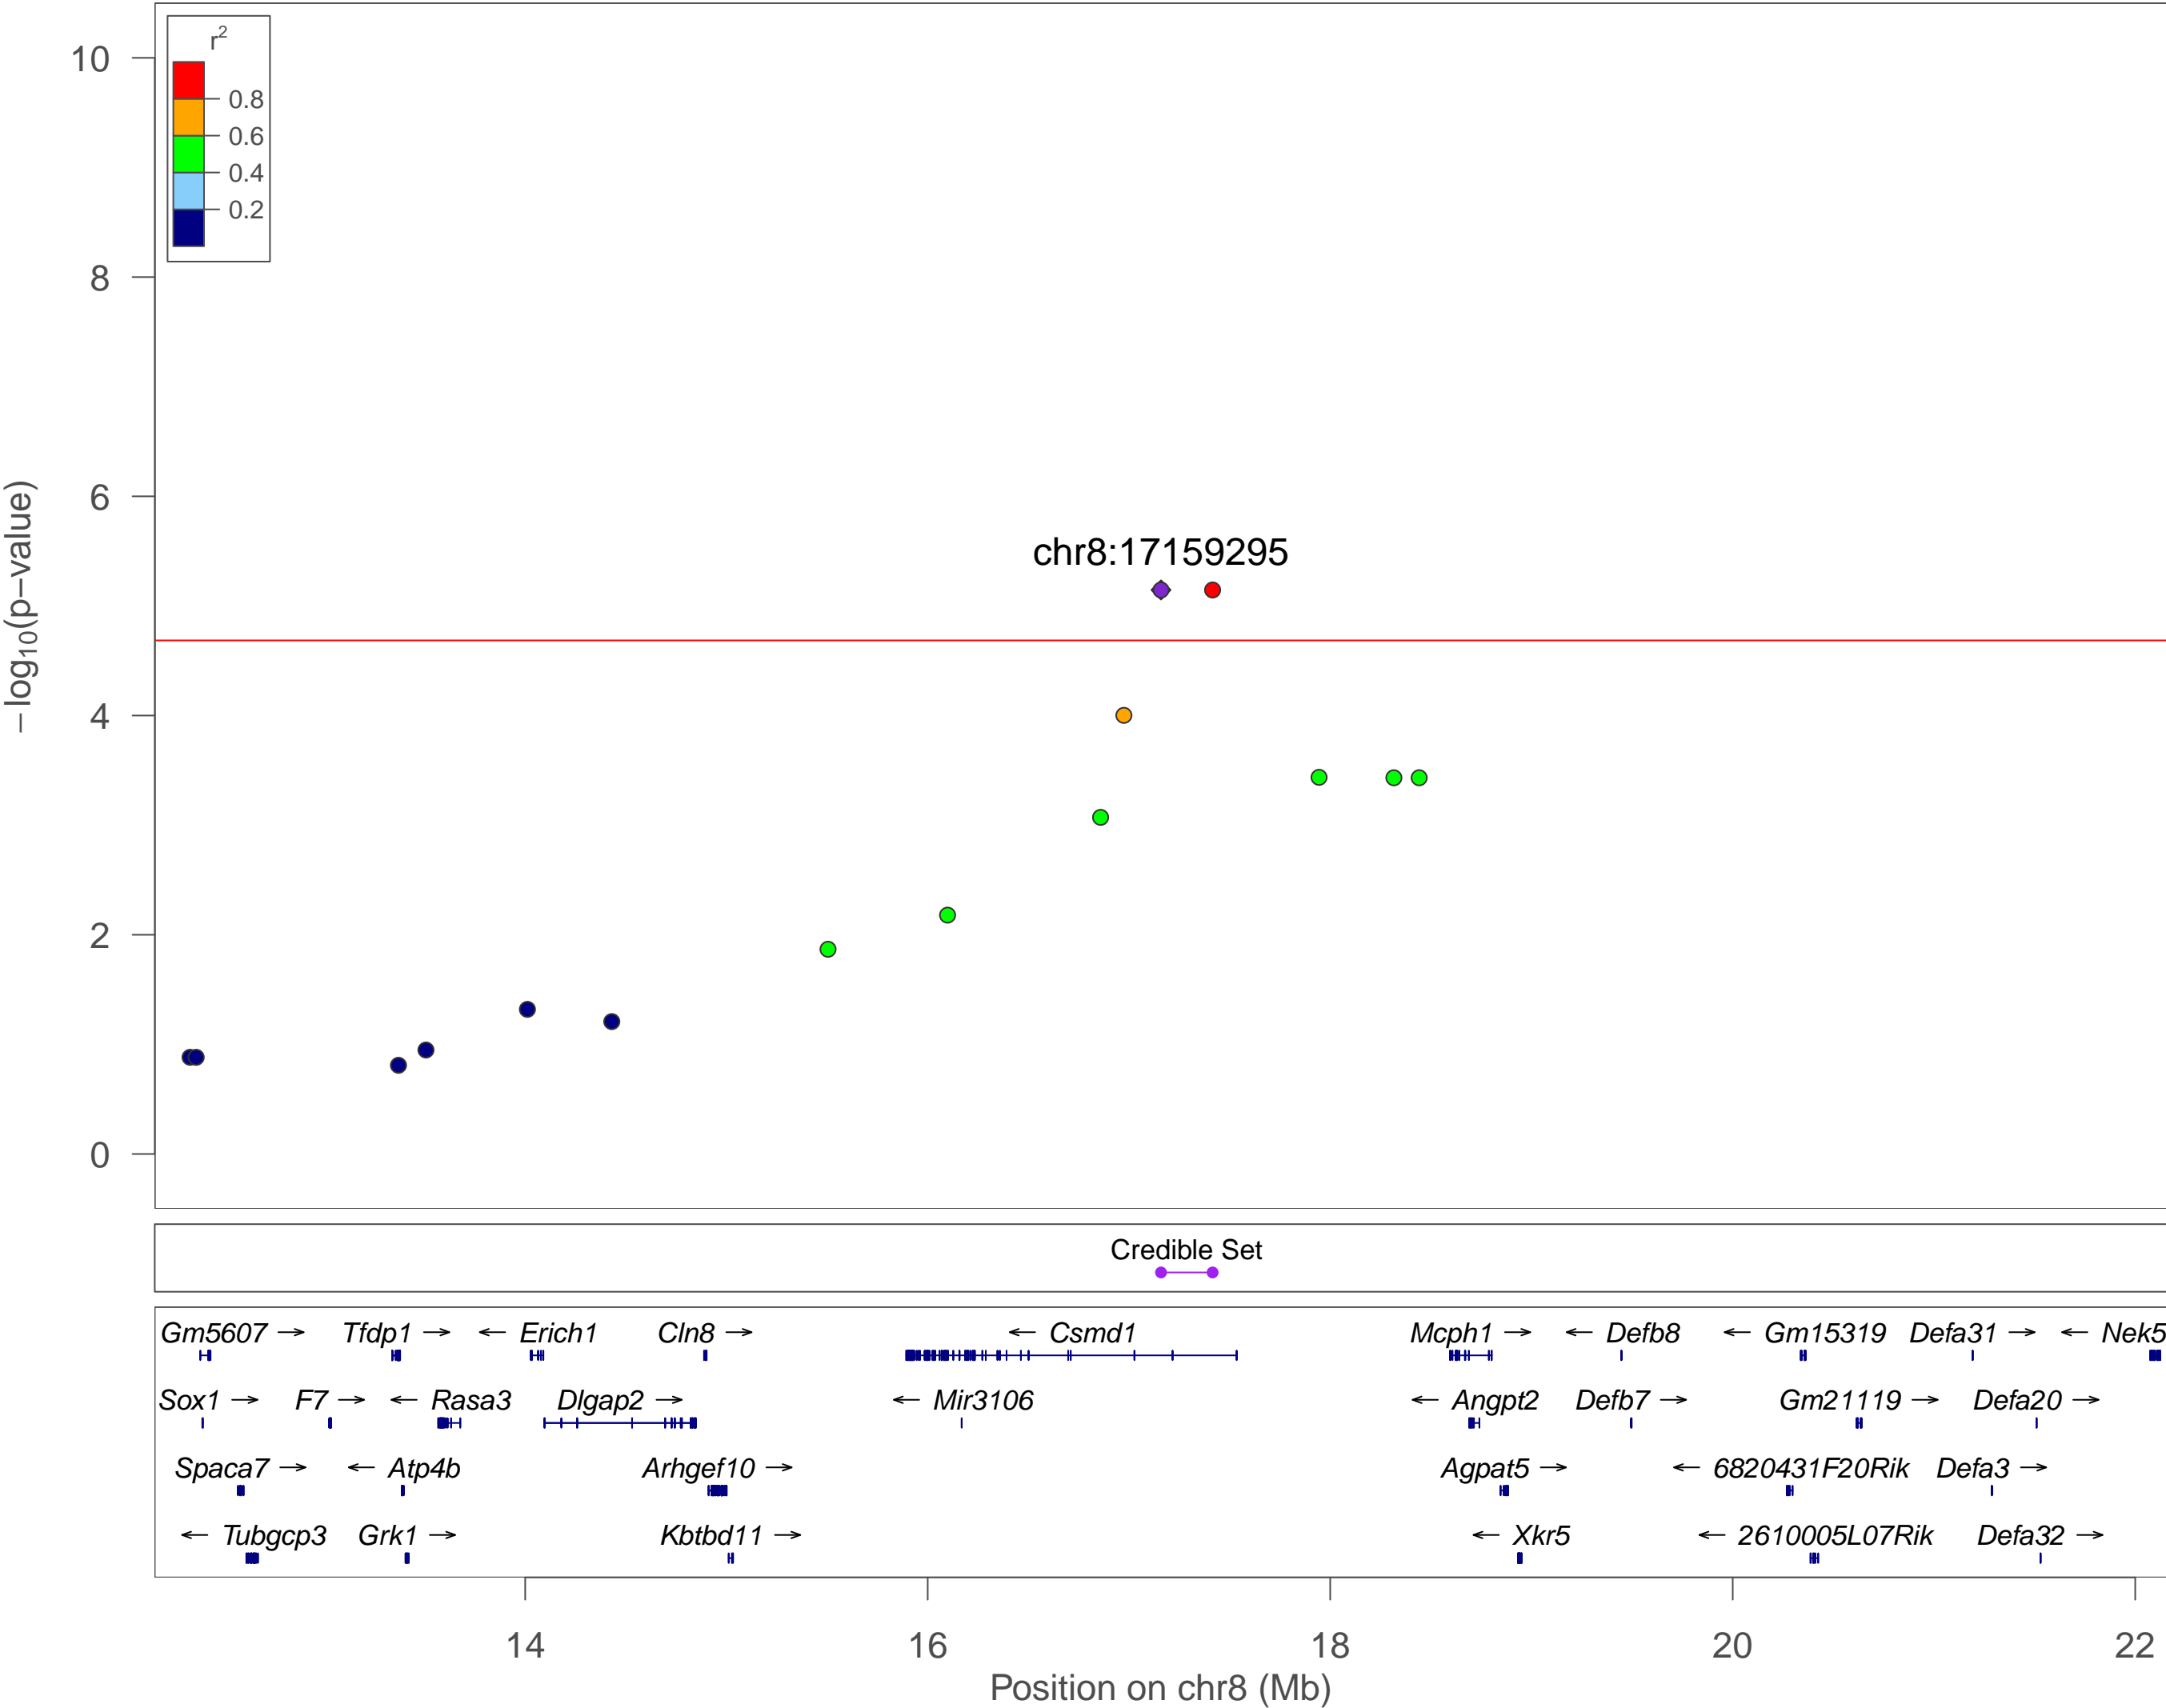

date: Thu Oct 25 16:56:00 2018

build: F34Array

display range: chr8:12159295–22159295 [12159295–22159295]

hilite range: 0 – 0 [ 0 – 0 ]

reference SNP: chr8:17159295

number of SNPs plotted: 16

min P-value: 7.15E–6 [chr8:17159295]

max P-value: 1.55E–1 [chr8:13370321]

omitted Genes: Gm15348, Atp11a, Gm15350

omitted Genes: Mcf2l, Gm38671, F10

omitted Genes: Proz, Pcid2, Cul4a

omitted Genes: Mir7065, Lamp1, Grtp1

omitted Genes: Mir1968, Adprhl1, Dcun1d2

omitted Genes: Tmco3, Tmem255b, Gas6

omitted Genes: 1700029H14Rik, 4932443I19Rik, Cdc16

omitted Genes: Upf3a, AF366264, Champ1

omitted Genes: Coprs, Fbxo25, Tdrp

omitted Genes: Gm5907, BB014433, Myom2

omitted Genes: Defb40, Defb37, Defb38

omitted Genes: Defb39, Defb12, Defb34

omitted Genes: Spag11b, Spag11a, Defb14

omitted Genes: Defb4, Defa-ps12, Defb6

omitted Genes: Defb46, Defb5, Defb3

omitted Genes: Defa-ps13, 4930467E23Rik, Gm21944

omitted Genes: Defb33, Gm15056, Gm6040

omitted Genes: AY761185, Defa21, Defa23

omitted Genes: Defa35, Defa25, Gm14851

omitted Genes: Defa30, Defa22, Gm15293

omitted Genes: Gm15292, Defa5, Defa27

omitted Genes: Defa29, Defa2, Defa33

omitted Genes: Defa36, Gm7849, Defa37

omitted Genes: Defa28, Gm7861, Defa26

omitted Genes: Defa17, Defa34, Defa-ps1

omitted Genes: AY761184, Defa24, Defb1

omitted Genes: Defb50, Defb2, Defb10

omitted Genes: Defb9, Defb11, Defb15

omitted Genes: Defb35, Defb13, Fam90a1a

omitted Genes: Ccdc70, Atp7b, Alg11

omitted Genes: Nek3

Make more plots at <http://csg.sph.umich.edu/locuszoom/>

Fine-mapping Regions

| snp           | chr | pos (Mb) | pp  | group        | color  |
|---------------|-----|----------|-----|--------------|--------|
| chr8:17159295 | 8   | 17.15930 | 0.5 | Credible Set | purple |
| chr8:17415659 | 8   | 17.41566 | 0.5 | Credible Set | purple |

F34 Array, quadriceps femoris muscle weight (mg)

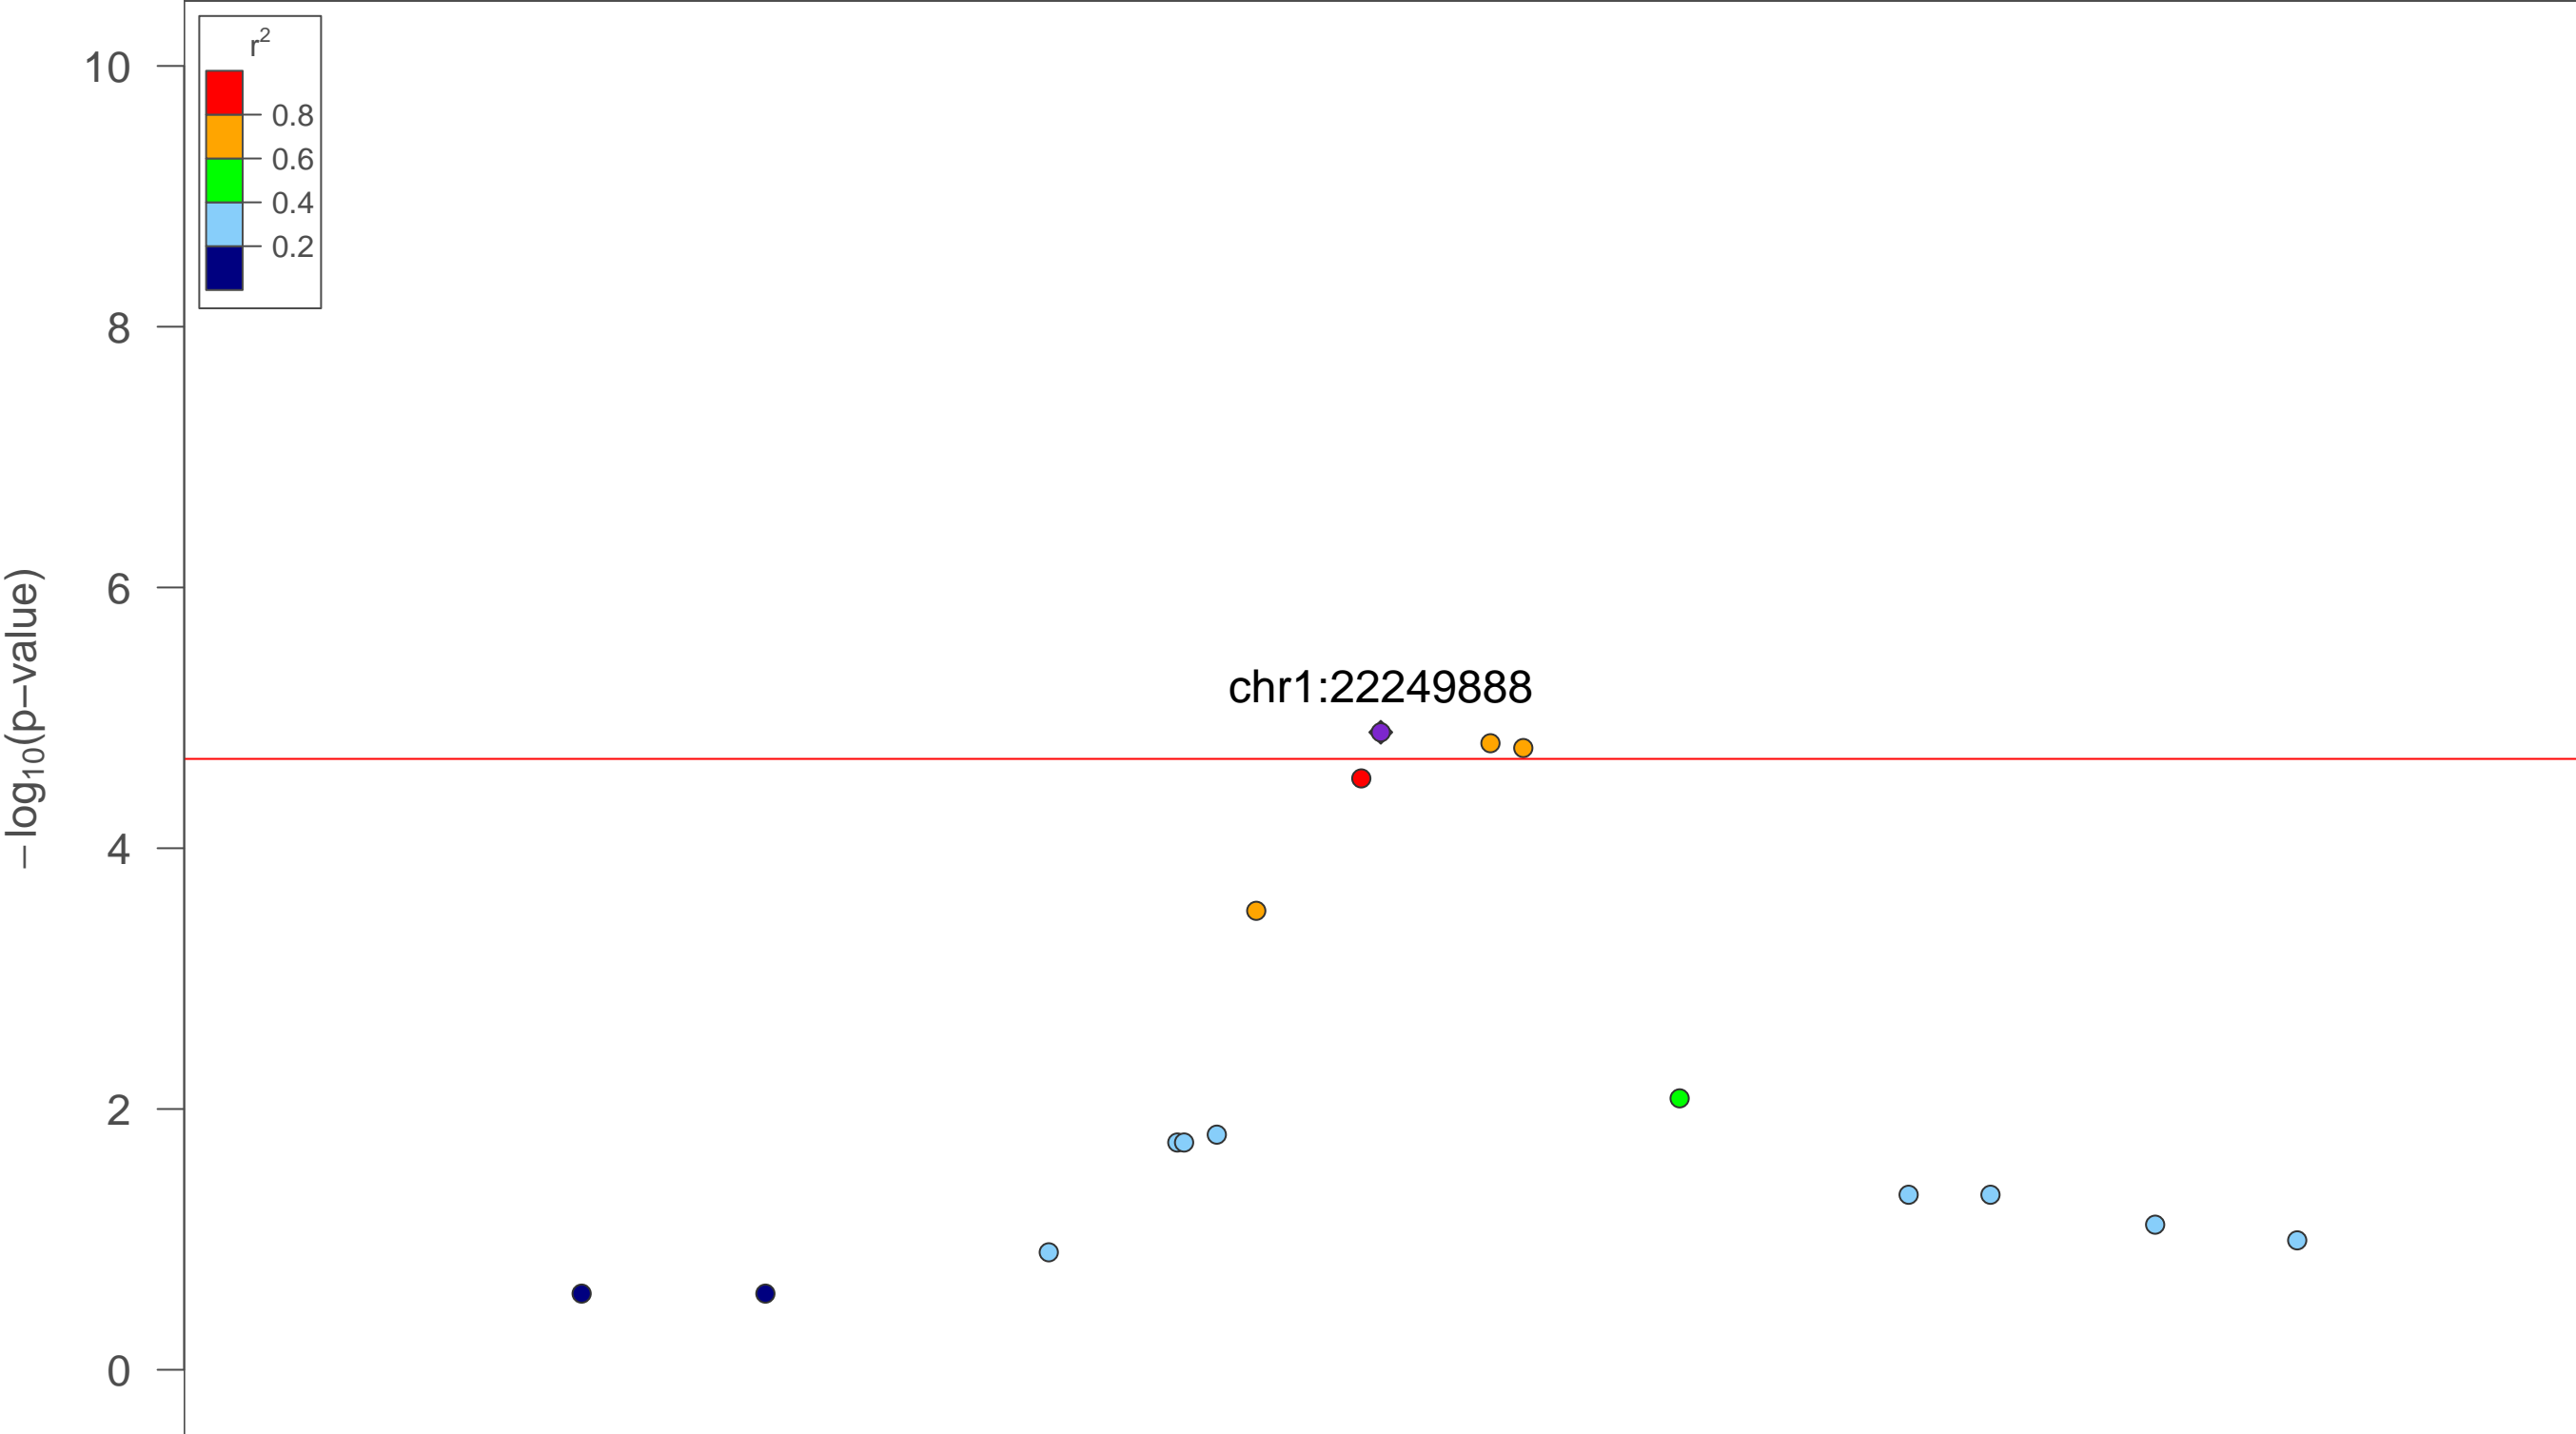

Credible Set

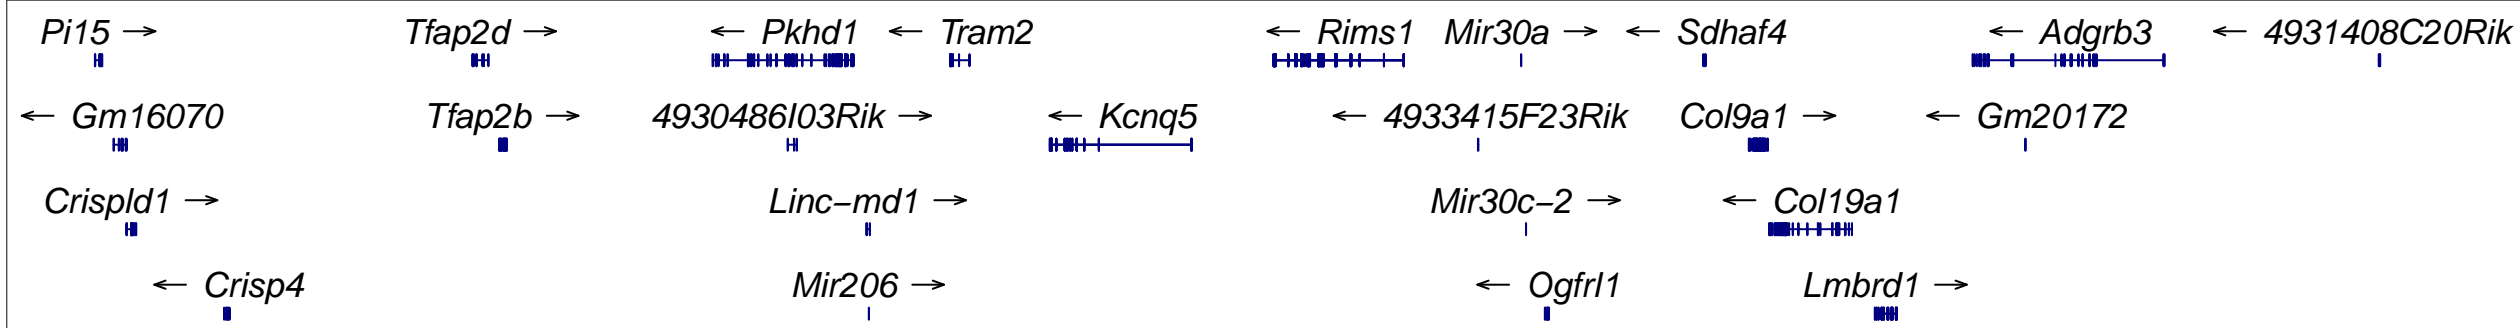

19 genes  
omitted

date: Thu Oct 25 16:56:13 2018  
build: F34Array  
display range: chr1:17249888–27249888 [17249888–27249888]  
hilite range: 0 – 0 [ 0 – 0 ]  
reference SNP: chr1:22249888  
number of SNPs plotted: 17  
min P-value: 1.29E–5 [chr1:22249888]  
max P-value: 2.6E–1 [chr1:18911051]  
omitted Genes: Defb44-ps, Defb18, Defb41  
omitted Genes: Mir133b, Il17a, Il17f  
omitted Genes: Mcm3, 6720483E21Rik, Paqr8  
omitted Genes: Efhc1, Tmem14a, Gsta3  
omitted Genes: Gm4956, Khdc1a, Khdc1c  
omitted Genes: Khdc1b, B3gat2, Smap1  
omitted Genes: Fam135a

Fine-mapping Regions

| snp           | chr | pos (Mb) | pp        | group        | color  |
|---------------|-----|----------|-----------|--------------|--------|
| chr1:22168405 | 1   | 22.16840 | 0.3152276 | Credible Set | purple |
| chr1:22249888 | 1   | 22.24989 | 0.6847724 | Credible Set | purple |

F34 Array, quadriceps femoris muscle weight (mg)

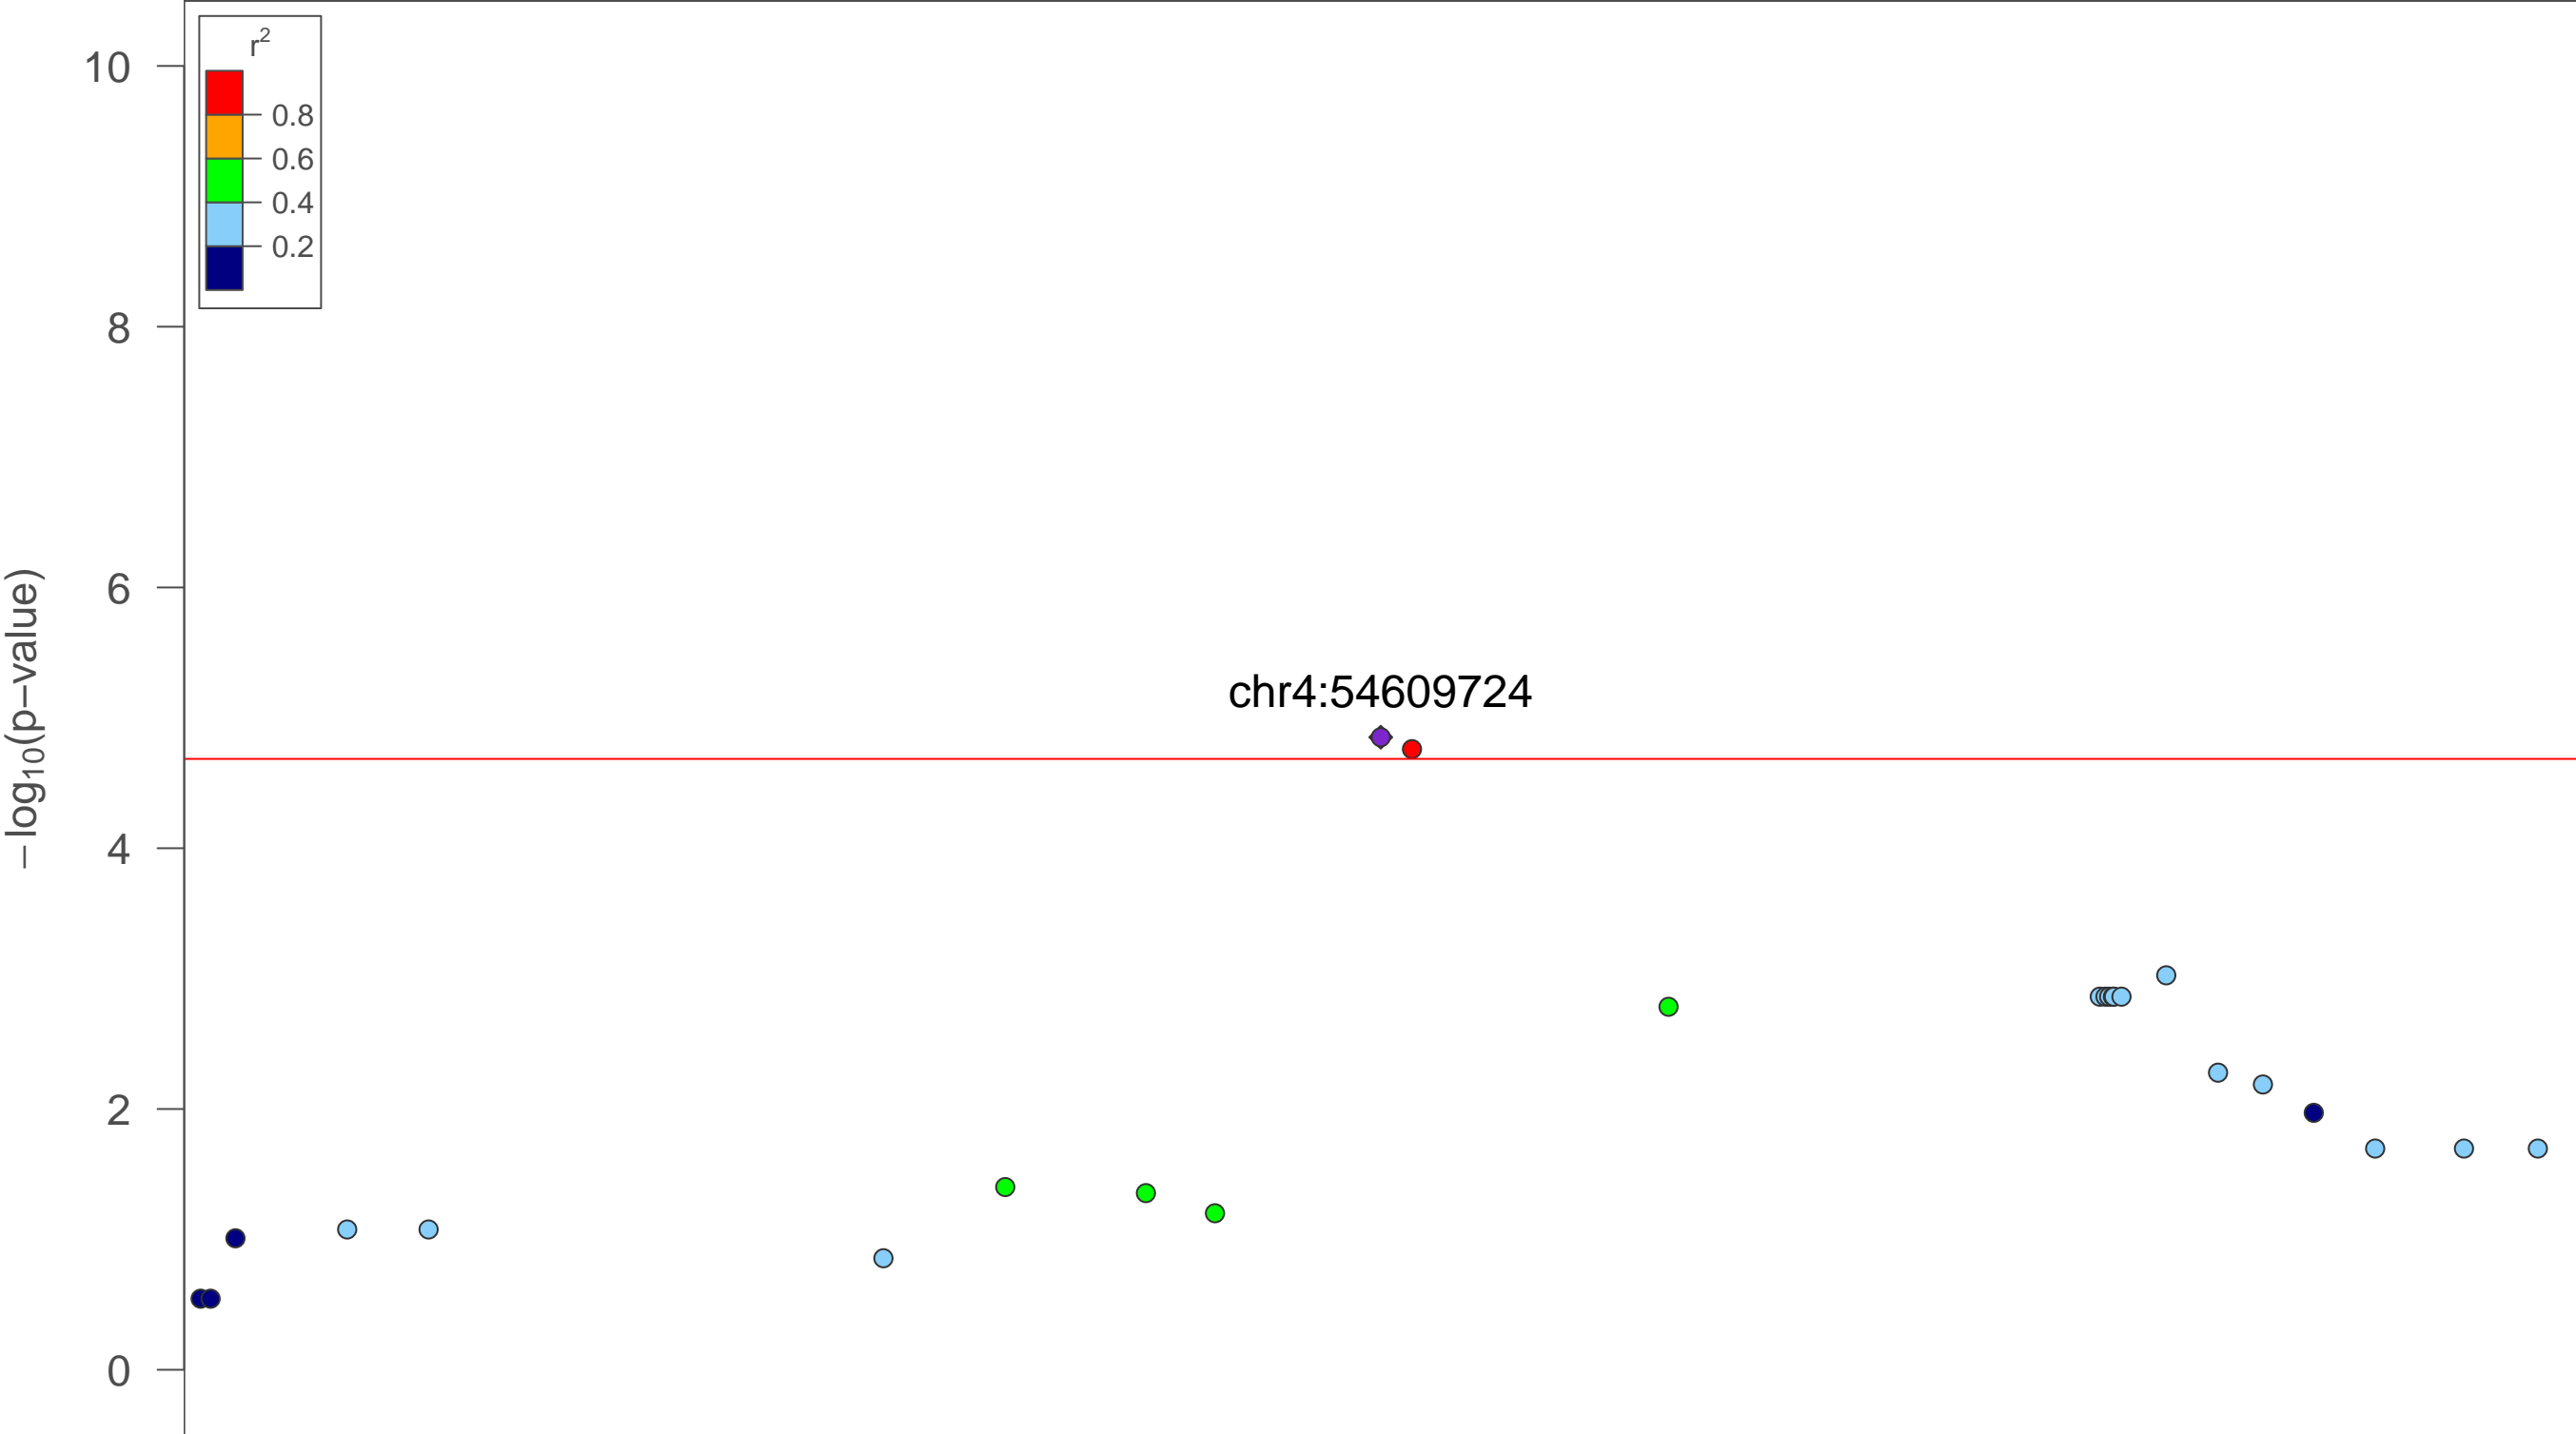

Credible Set

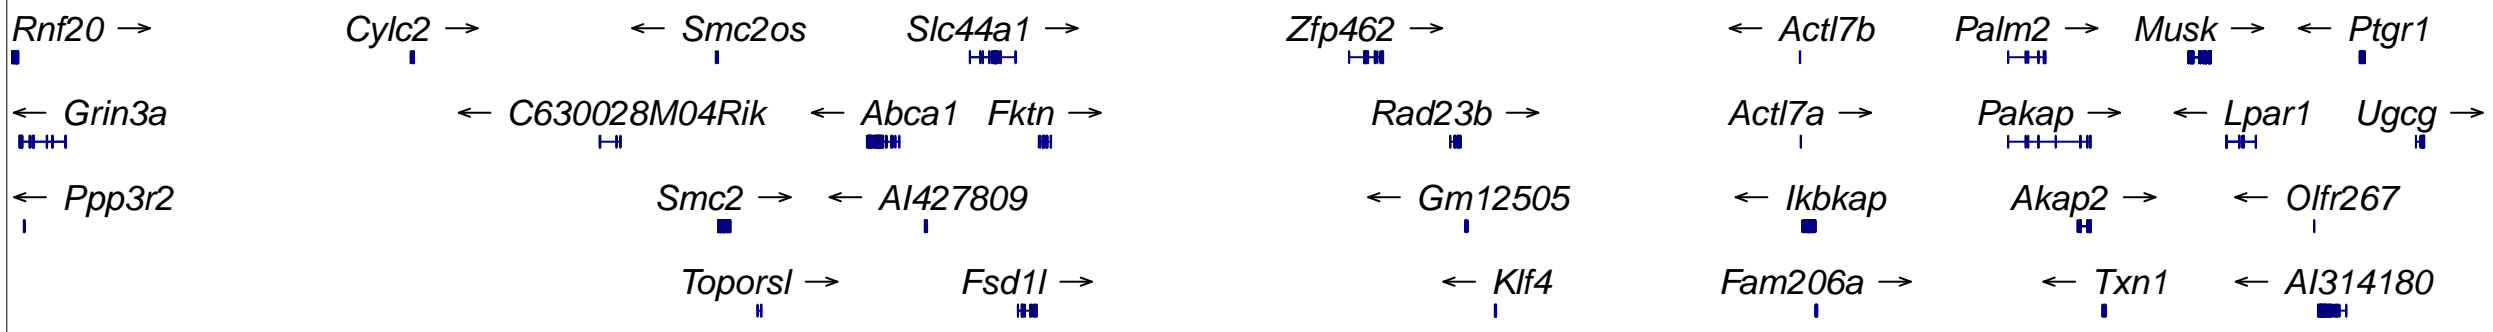

29 genes  
omitted

date: Thu Oct 25 16:56:26 2018  
build: F34Array  
display range: chr4:49609724–59609724 [49609724–59609724]  
hilite range: 0 – 0 [ 0 – 0 ]  
reference SNP: chr4:54609724  
number of SNPs plotted: 26  
min P-value: 1.41E–5 [chr4:54609724]  
max P-value: 2.85E–1 [chr4:49679066]  
omitted Genes: 4930552N02Rik, Olfr275, Olfr273  
omitted Genes: Olfr272, Olfr270, Nipsnap3a  
omitted Genes: Nipsnap3b, 4930522O17Rik, Tal2  
omitted Genes: Tmem38b, Ctnna1, Tmem245  
omitted Genes: Mir32, Frs1l, Epb41l4b  
omitted Genes: Gm12530, Ptpn3, 1700042G15Rik  
omitted Genes: D630039A03Rik, Txndc8, Sveg1  
omitted Genes: Mir3095, Zkscan16, Dnajc25  
omitted Genes: Gng10, Gm12596, Susd1  
omitted Genes: Ptbp3, Hsdl2



Fine-mapping Regions

| snp           | chr | pos (Mb) | pp        | group        | color  |
|---------------|-----|----------|-----------|--------------|--------|
| chr4:54609724 | 4   | 54.60972 | 0.5499053 | Credible Set | purple |
| chr4:54740078 | 4   | 54.74008 | 0.4500947 | Credible Set | purple |

F34 Array, quadriceps femoris muscle weight (mg)

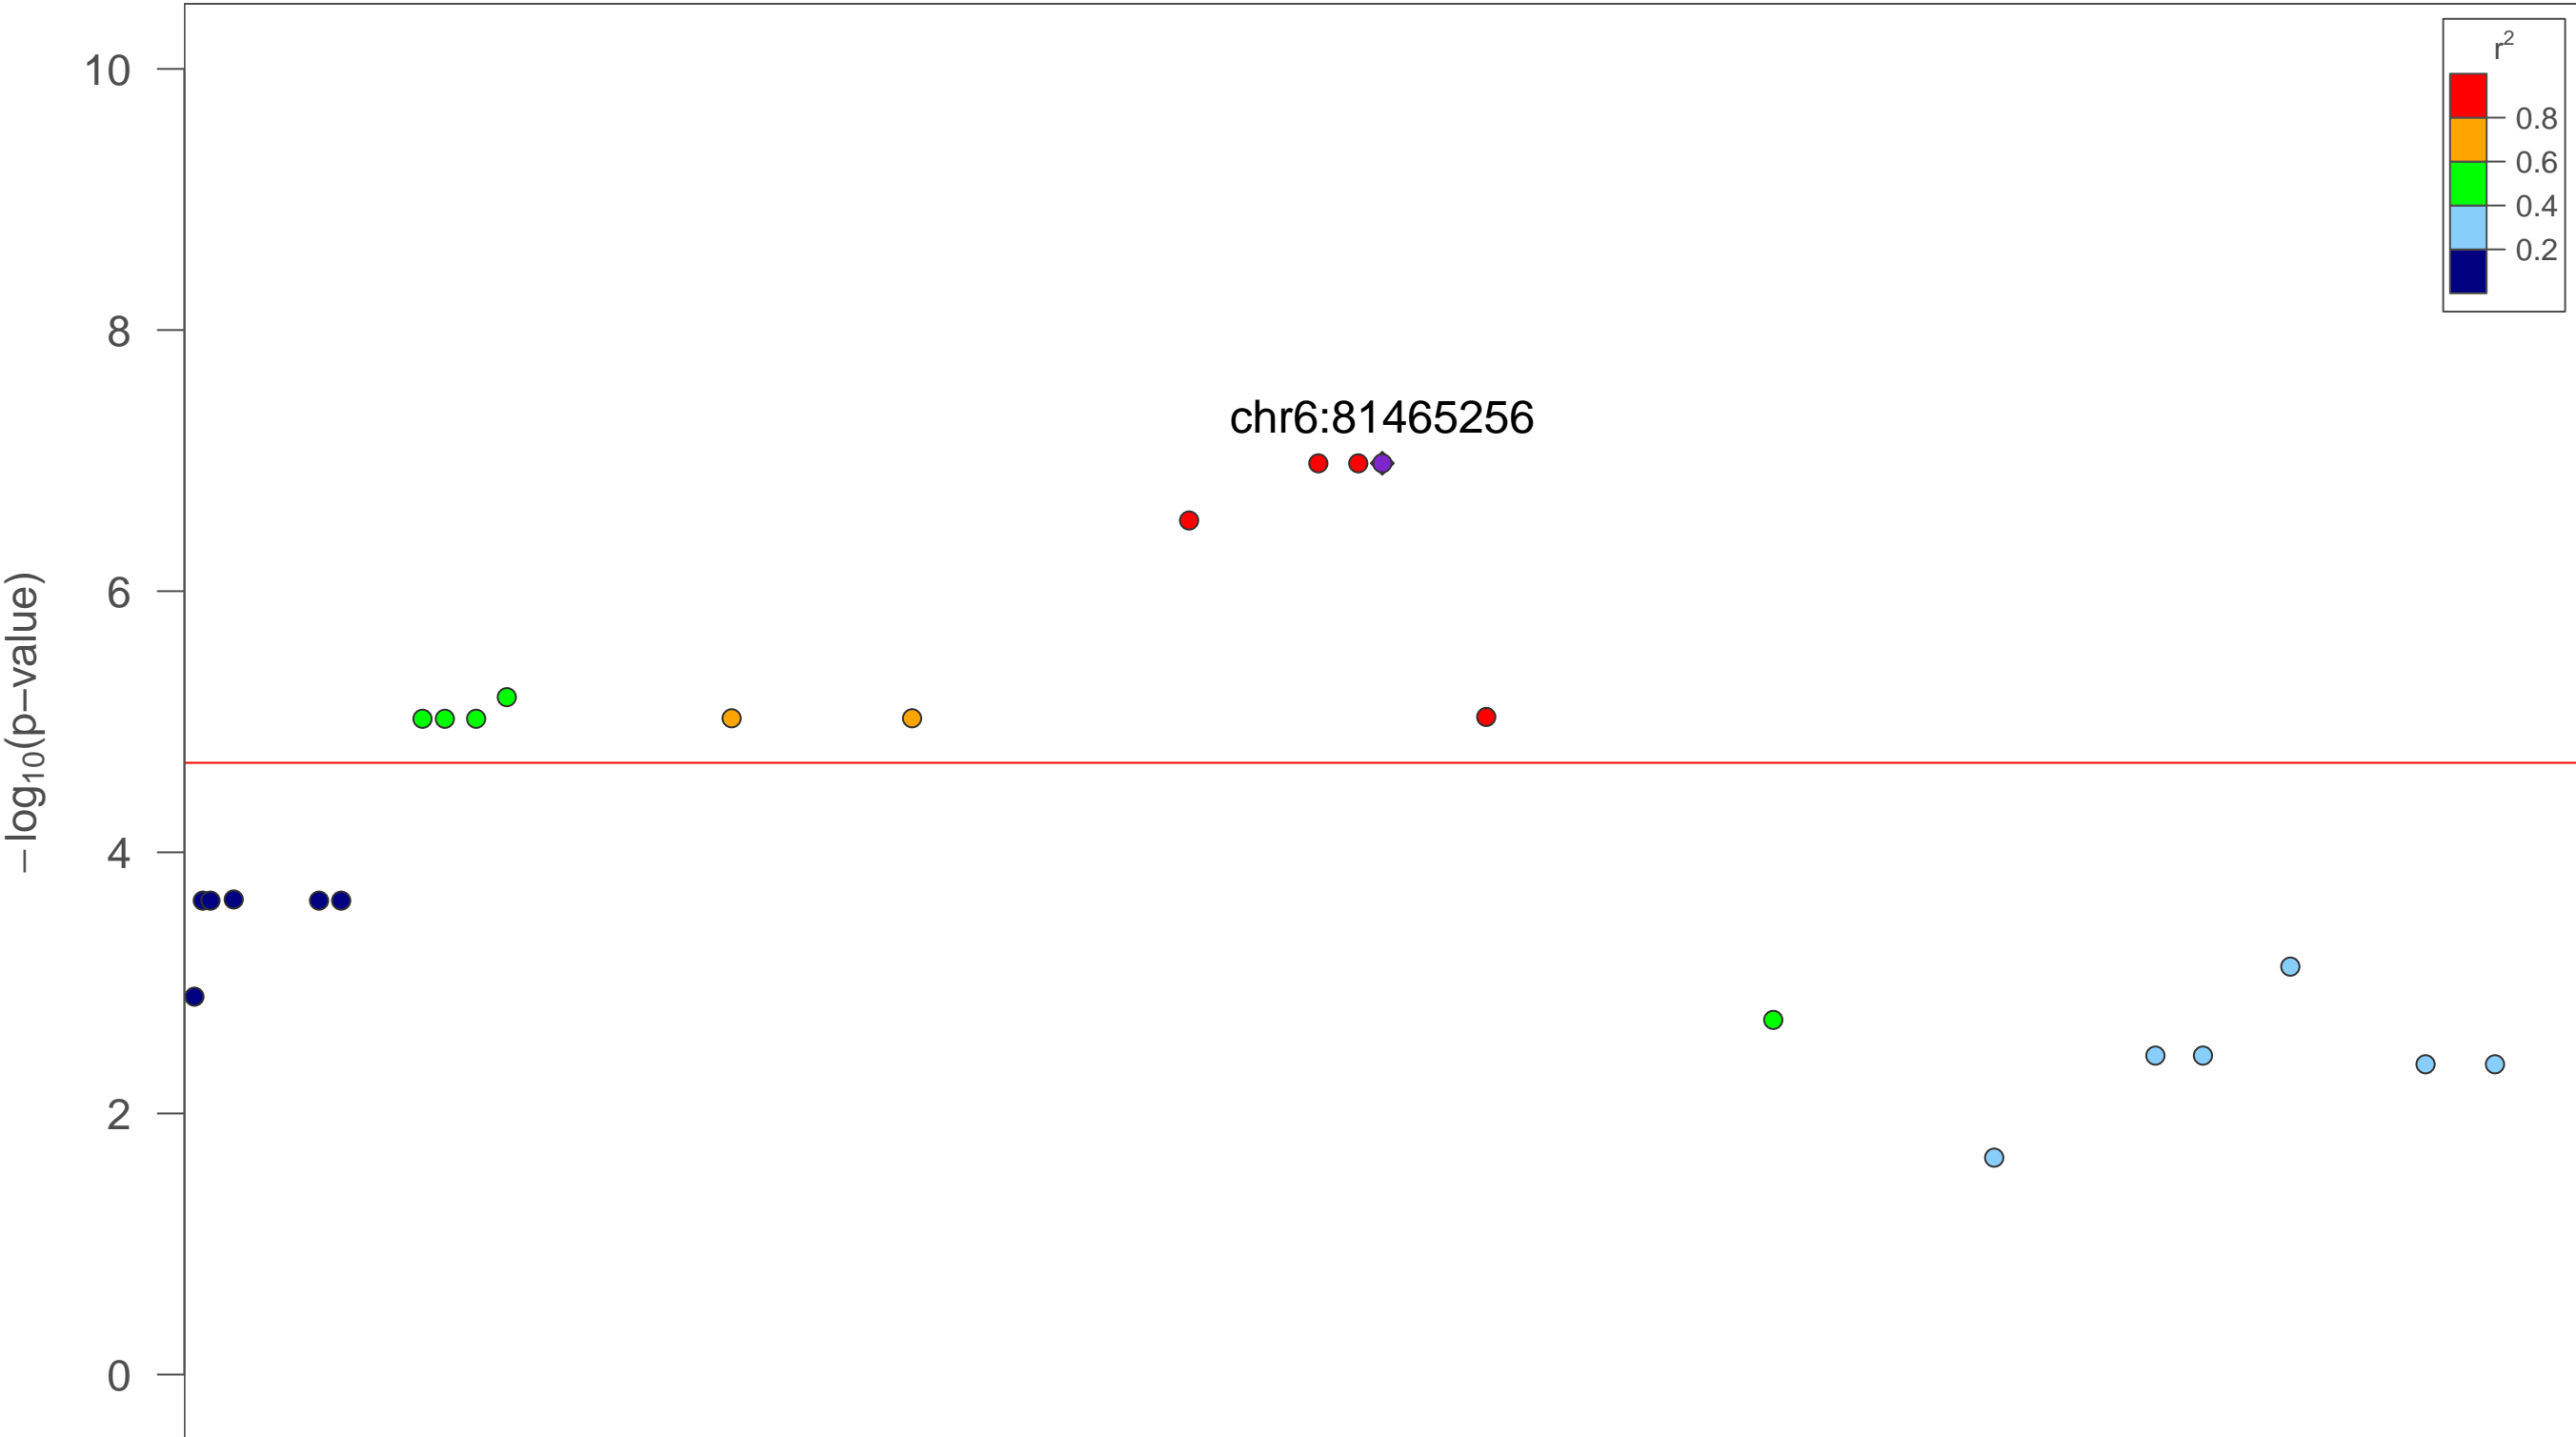

Credible Set

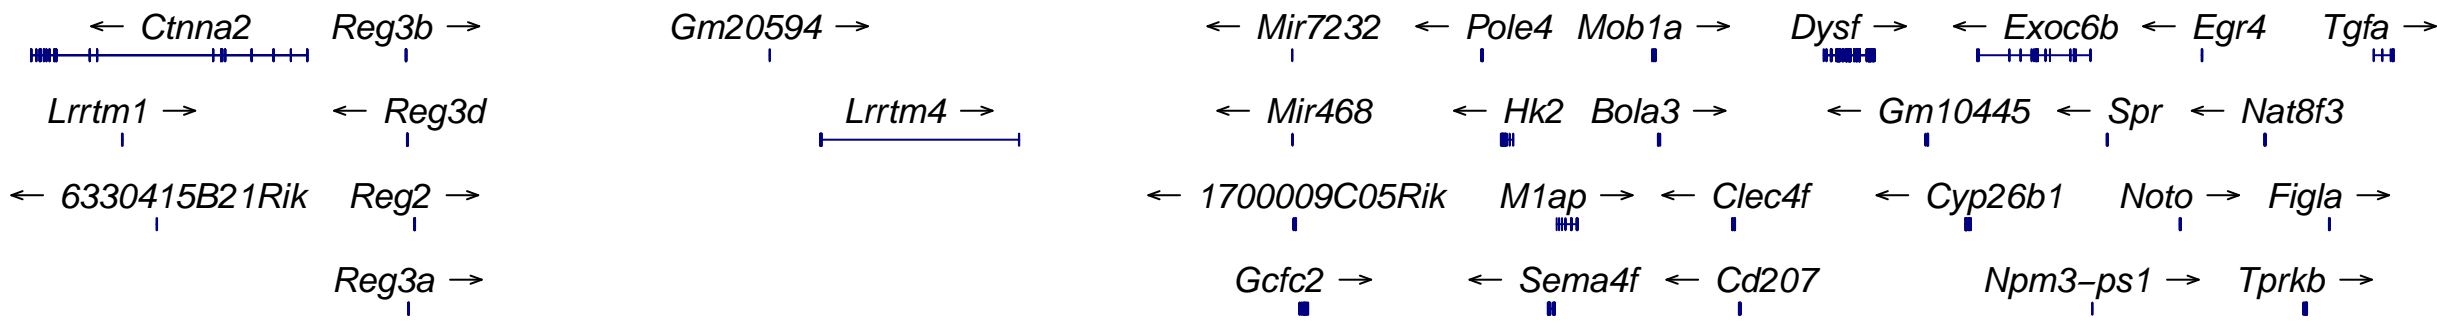

71 genes  
omitted

date: Thu Oct 25 16:56:34 2018  
build: F34Array  
display range: chr6:76465256–86465256 [76465256–86465256]  
hilite range: 0 – 0 [ 0 – 0 ]  
reference SNP: chr6:81465256  
number of SNPs plotted: 25  
min P-value: 1.05E–7 [chr6:81465256]  
max P-value: 2.18E–2 [chr6:84018933]  
omitted Genes: Reg1, Reg3g, Gm20362  
omitted Genes: Mrpl19, Eva1a, Tacr1  
omitted Genes: 2310069B03Rik, Dok1, Loxl3  
omitted Genes: Mir7040, Htra2, Aup1  
omitted Genes: Dqx1, Tlx2, Pcgf1  
omitted Genes: Lbx2, Mir3470a, Ccdc142  
omitted Genes: Mrpl53, Mogs, Wbp1  
omitted Genes: Ino80b, Rtkn, Wdr54  
omitted Genes: 1700003E16Rik, Dctn1, Slc4a5  
omitted Genes: Mthfd2, Tet3, Mir6374  
omitted Genes: B230319C09Rik, Dguok, Actg2  
omitted Genes: Stambp, Gm21284, Vax2os  
omitted Genes: Vax2, Atp6v1b1, 1700124L16Rik  
omitted Genes: Ankrd53, Tex261, Gm7443  
omitted Genes: Nagk, Paip2b, Zfp638  
omitted Genes: Gm5878, Emx1, Sfxn5  
omitted Genes: Rab11fip5, Mir705, Smyd5  
omitted Genes: Pradc1, Cct7, Fbxo41  
omitted Genes: Alms1, Nat8f7, Mir6375  
omitted Genes: Alms1-ps2, Nat8f6, Nat8f5  
omitted Genes: Nat8, Nat8f2, Nat8f4  
omitted Genes: Nat8f1, Dusp11, Add2  
omitted Genes: Fam136a, Snrpg, Pcyox1  
omitted Genes: Tia1, C87436

Fine-mapping Regions

| snp           | chr | pos (Mb) | pp        | group        | color  |
|---------------|-----|----------|-----------|--------------|--------|
| chr6:80659015 | 6   | 80.65901 | 0.1112528 | Credible Set | purple |
| chr6:81198298 | 6   | 81.19830 | 0.2948104 | Credible Set | purple |
| chr6:81364957 | 6   | 81.36496 | 0.2948104 | Credible Set | purple |
| chr6:81465256 | 6   | 81.46526 | 0.2951438 | Credible Set | purple |

# F34 Array, quadriceps femoris muscle weight (mg)

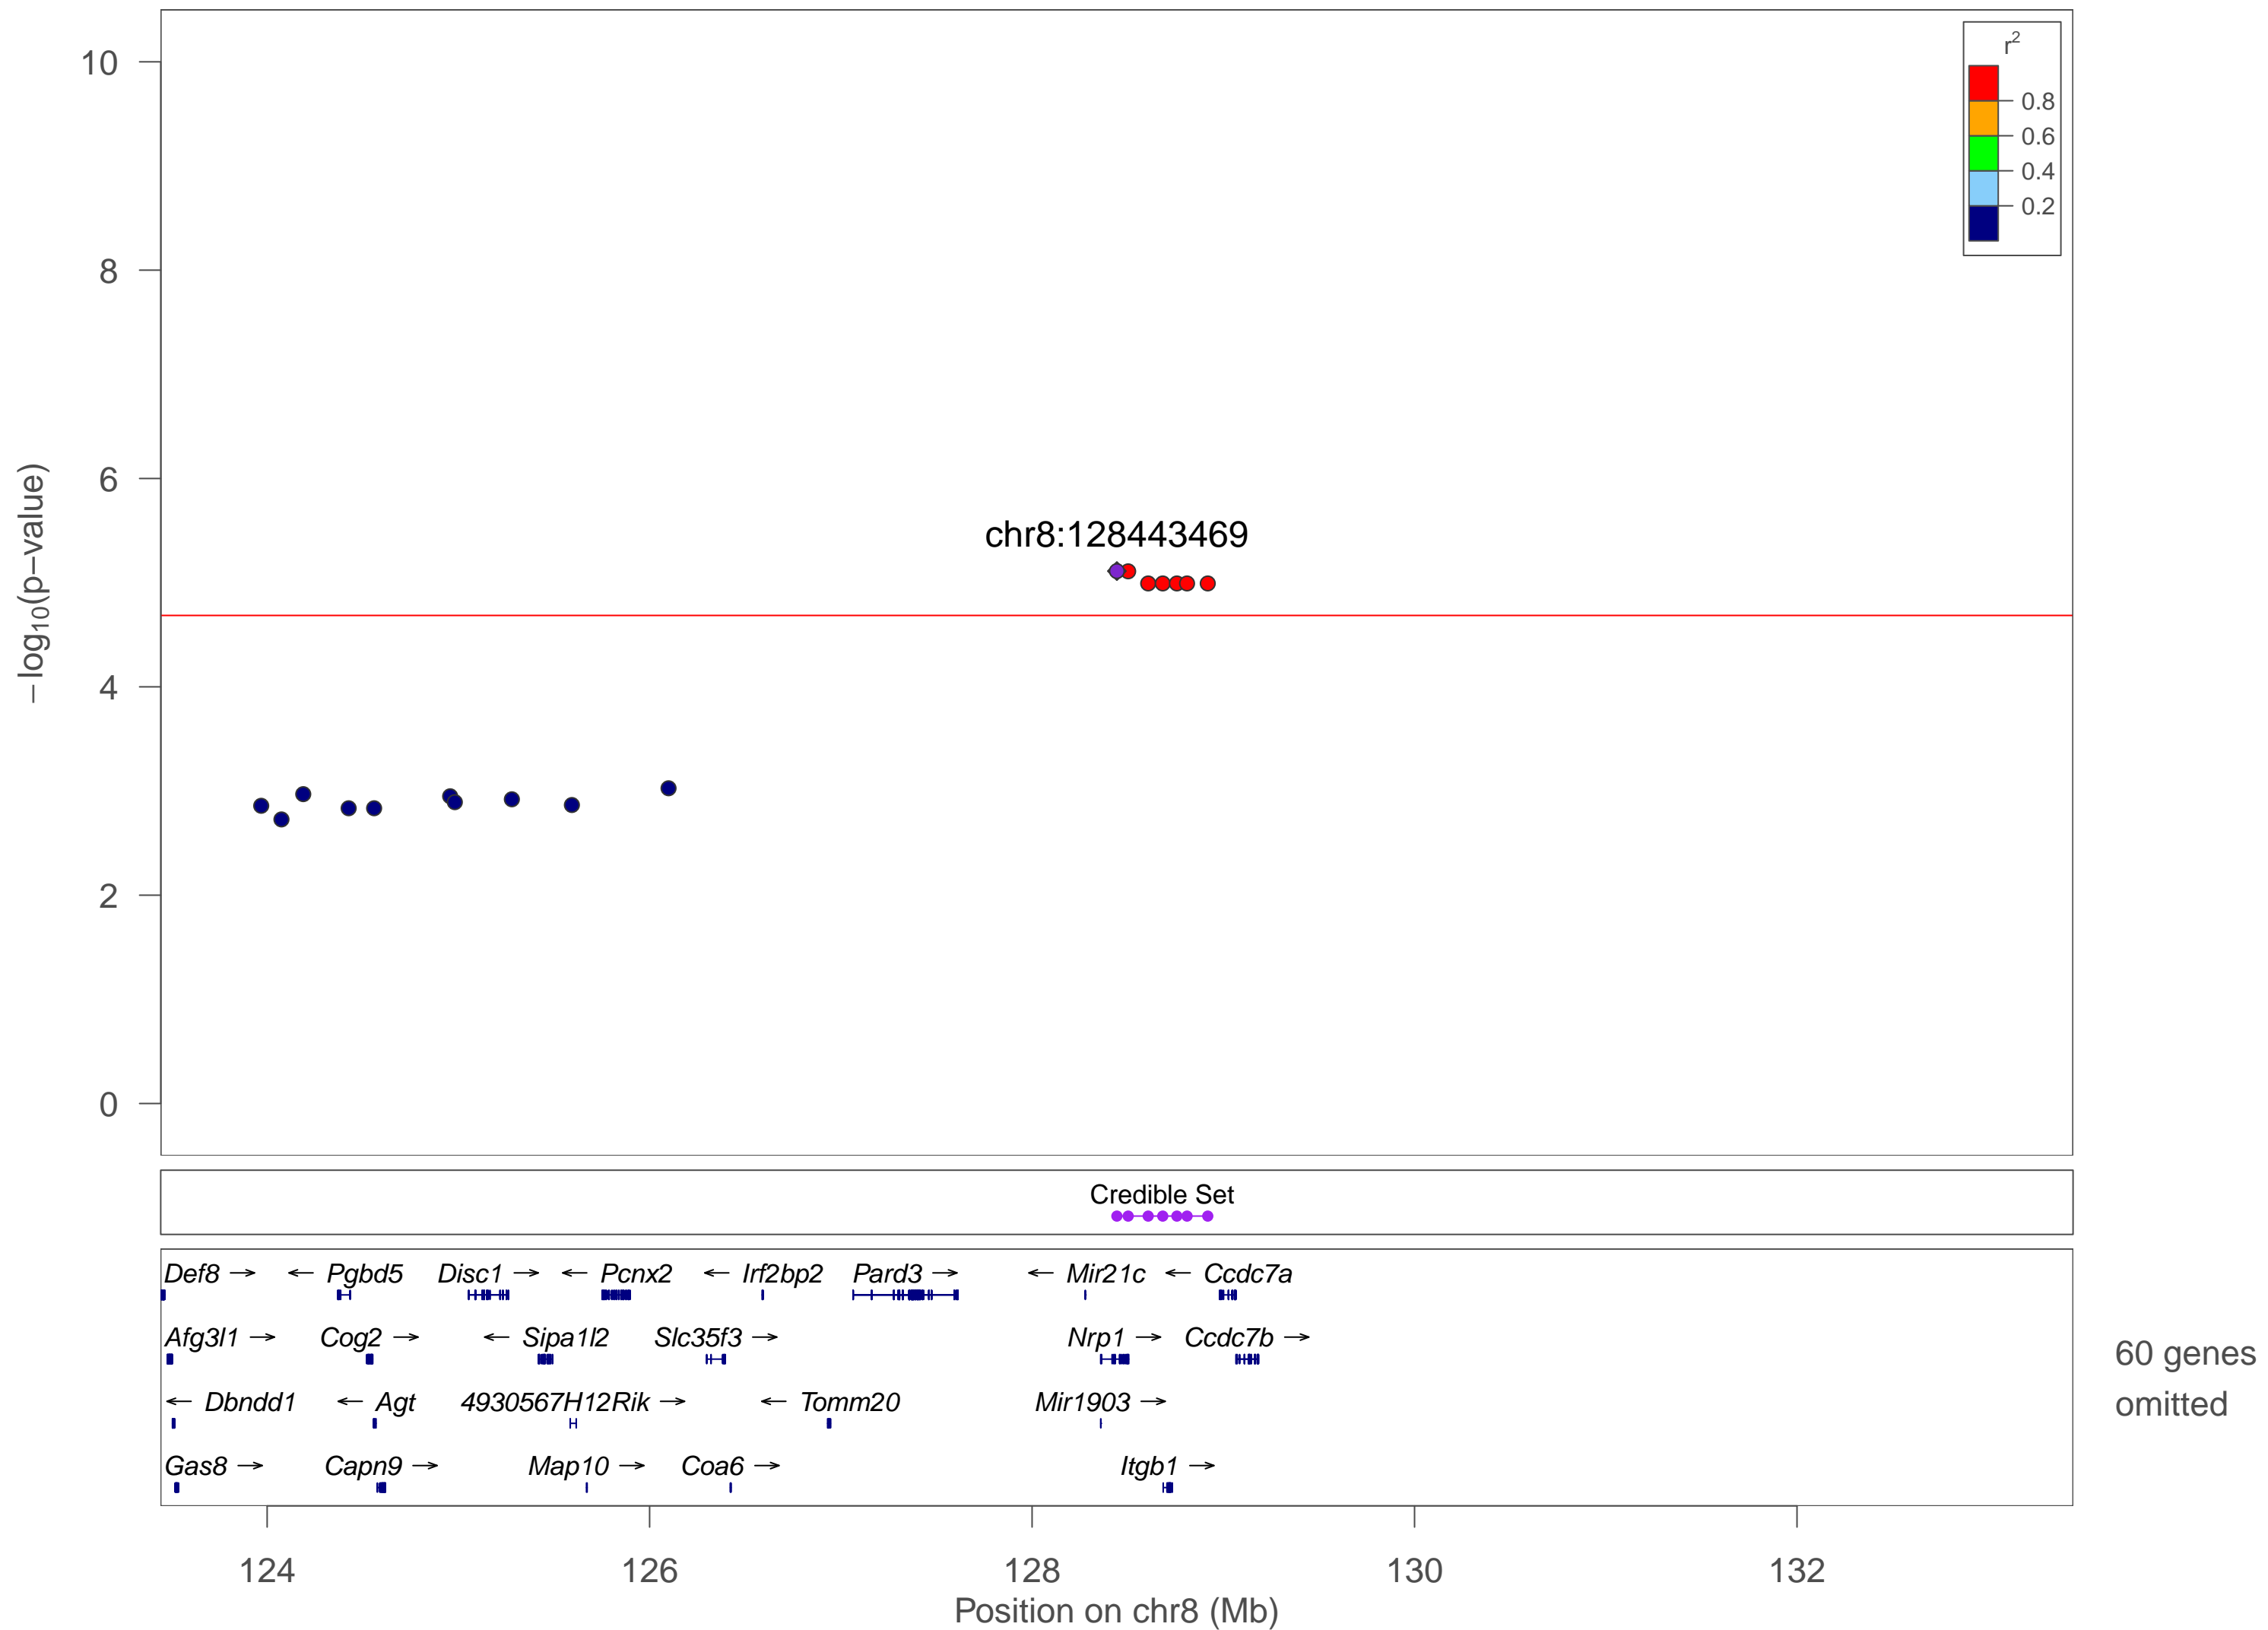

date: Thu Oct 25 16:56:41 2018  
build: F34Array  
display range: chr8:123443469–133443469 [123443469–133443469]  
hilite range: 0 – 0 [ 0 – 0 ]  
reference SNP: chr8:128443469  
number of SNPs plotted: 18  
min P-value: 7.74E–6 [chr8:128443469]  
max P-value: 1.87E–3 [chr8:124074818]  
omitted Genes: n-R5s100, n-R5s103, n-R5s104  
omitted Genes: n-R5s105, n-R5s108, n-R5s110  
omitted Genes: n-R5s111, n-R5s113, Gm25018  
omitted Genes: n-R5s117, n-R5s121, n-R5s122  
omitted Genes: n-R5s123, n-R5s124, n-R5s128  
omitted Genes: Gm26391, n-R5s133, n-R5s134  
omitted Genes: Rn5s, n-R5s136, n-R5s138  
omitted Genes: n-R5s139, Gm22109, n-R5s141  
omitted Genes: n-R5s142, n-R5s143, n-R5s144  
omitted Genes: Gm25212, n-R5s146, Gm22291  
omitted Genes: Gm23284, n-R5s149, Rhou  
omitted Genes: 6030466F02Rik, Rab4a, Ccsap  
omitted Genes: Acta1, Nup133, Abcb10  
omitted Genes: Taf5l, Mir1967, Urb2  
omitted Genes: Galnt2, 2310022B05Rik, Ttc13  
omitted Genes: Arv1, Fam89a, Trim67  
omitted Genes: 2810004N23Rik, Gnpat, Exoc8  
omitted Genes: Sprtn, Egln1, Tsnax  
omitted Genes: Ntpcr, BC021891, Kcnk1  
omitted Genes: Gm17296, Rbm34, 2610044O15Rik8

Fine-mapping Regions

| snp            | chr | pos (Mb) | pp        | group        | color  |
|----------------|-----|----------|-----------|--------------|--------|
| chr8:128443469 | 8   | 128.4435 | 0.1709426 | Credible Set | purple |
| chr8:128502425 | 8   | 128.5024 | 0.1701707 | Credible Set | purple |
| chr8:128607127 | 8   | 128.6071 | 0.1317773 | Credible Set | purple |
| chr8:128683251 | 8   | 128.6833 | 0.1317773 | Credible Set | purple |
| chr8:128757217 | 8   | 128.7572 | 0.1317773 | Credible Set | purple |
| chr8:128810304 | 8   | 128.8103 | 0.1317773 | Credible Set | purple |
| chr8:128918665 | 8   | 128.9187 | 0.1317773 | Credible Set | purple |

F34 Array, quadriceps femoris muscle weight (mg)

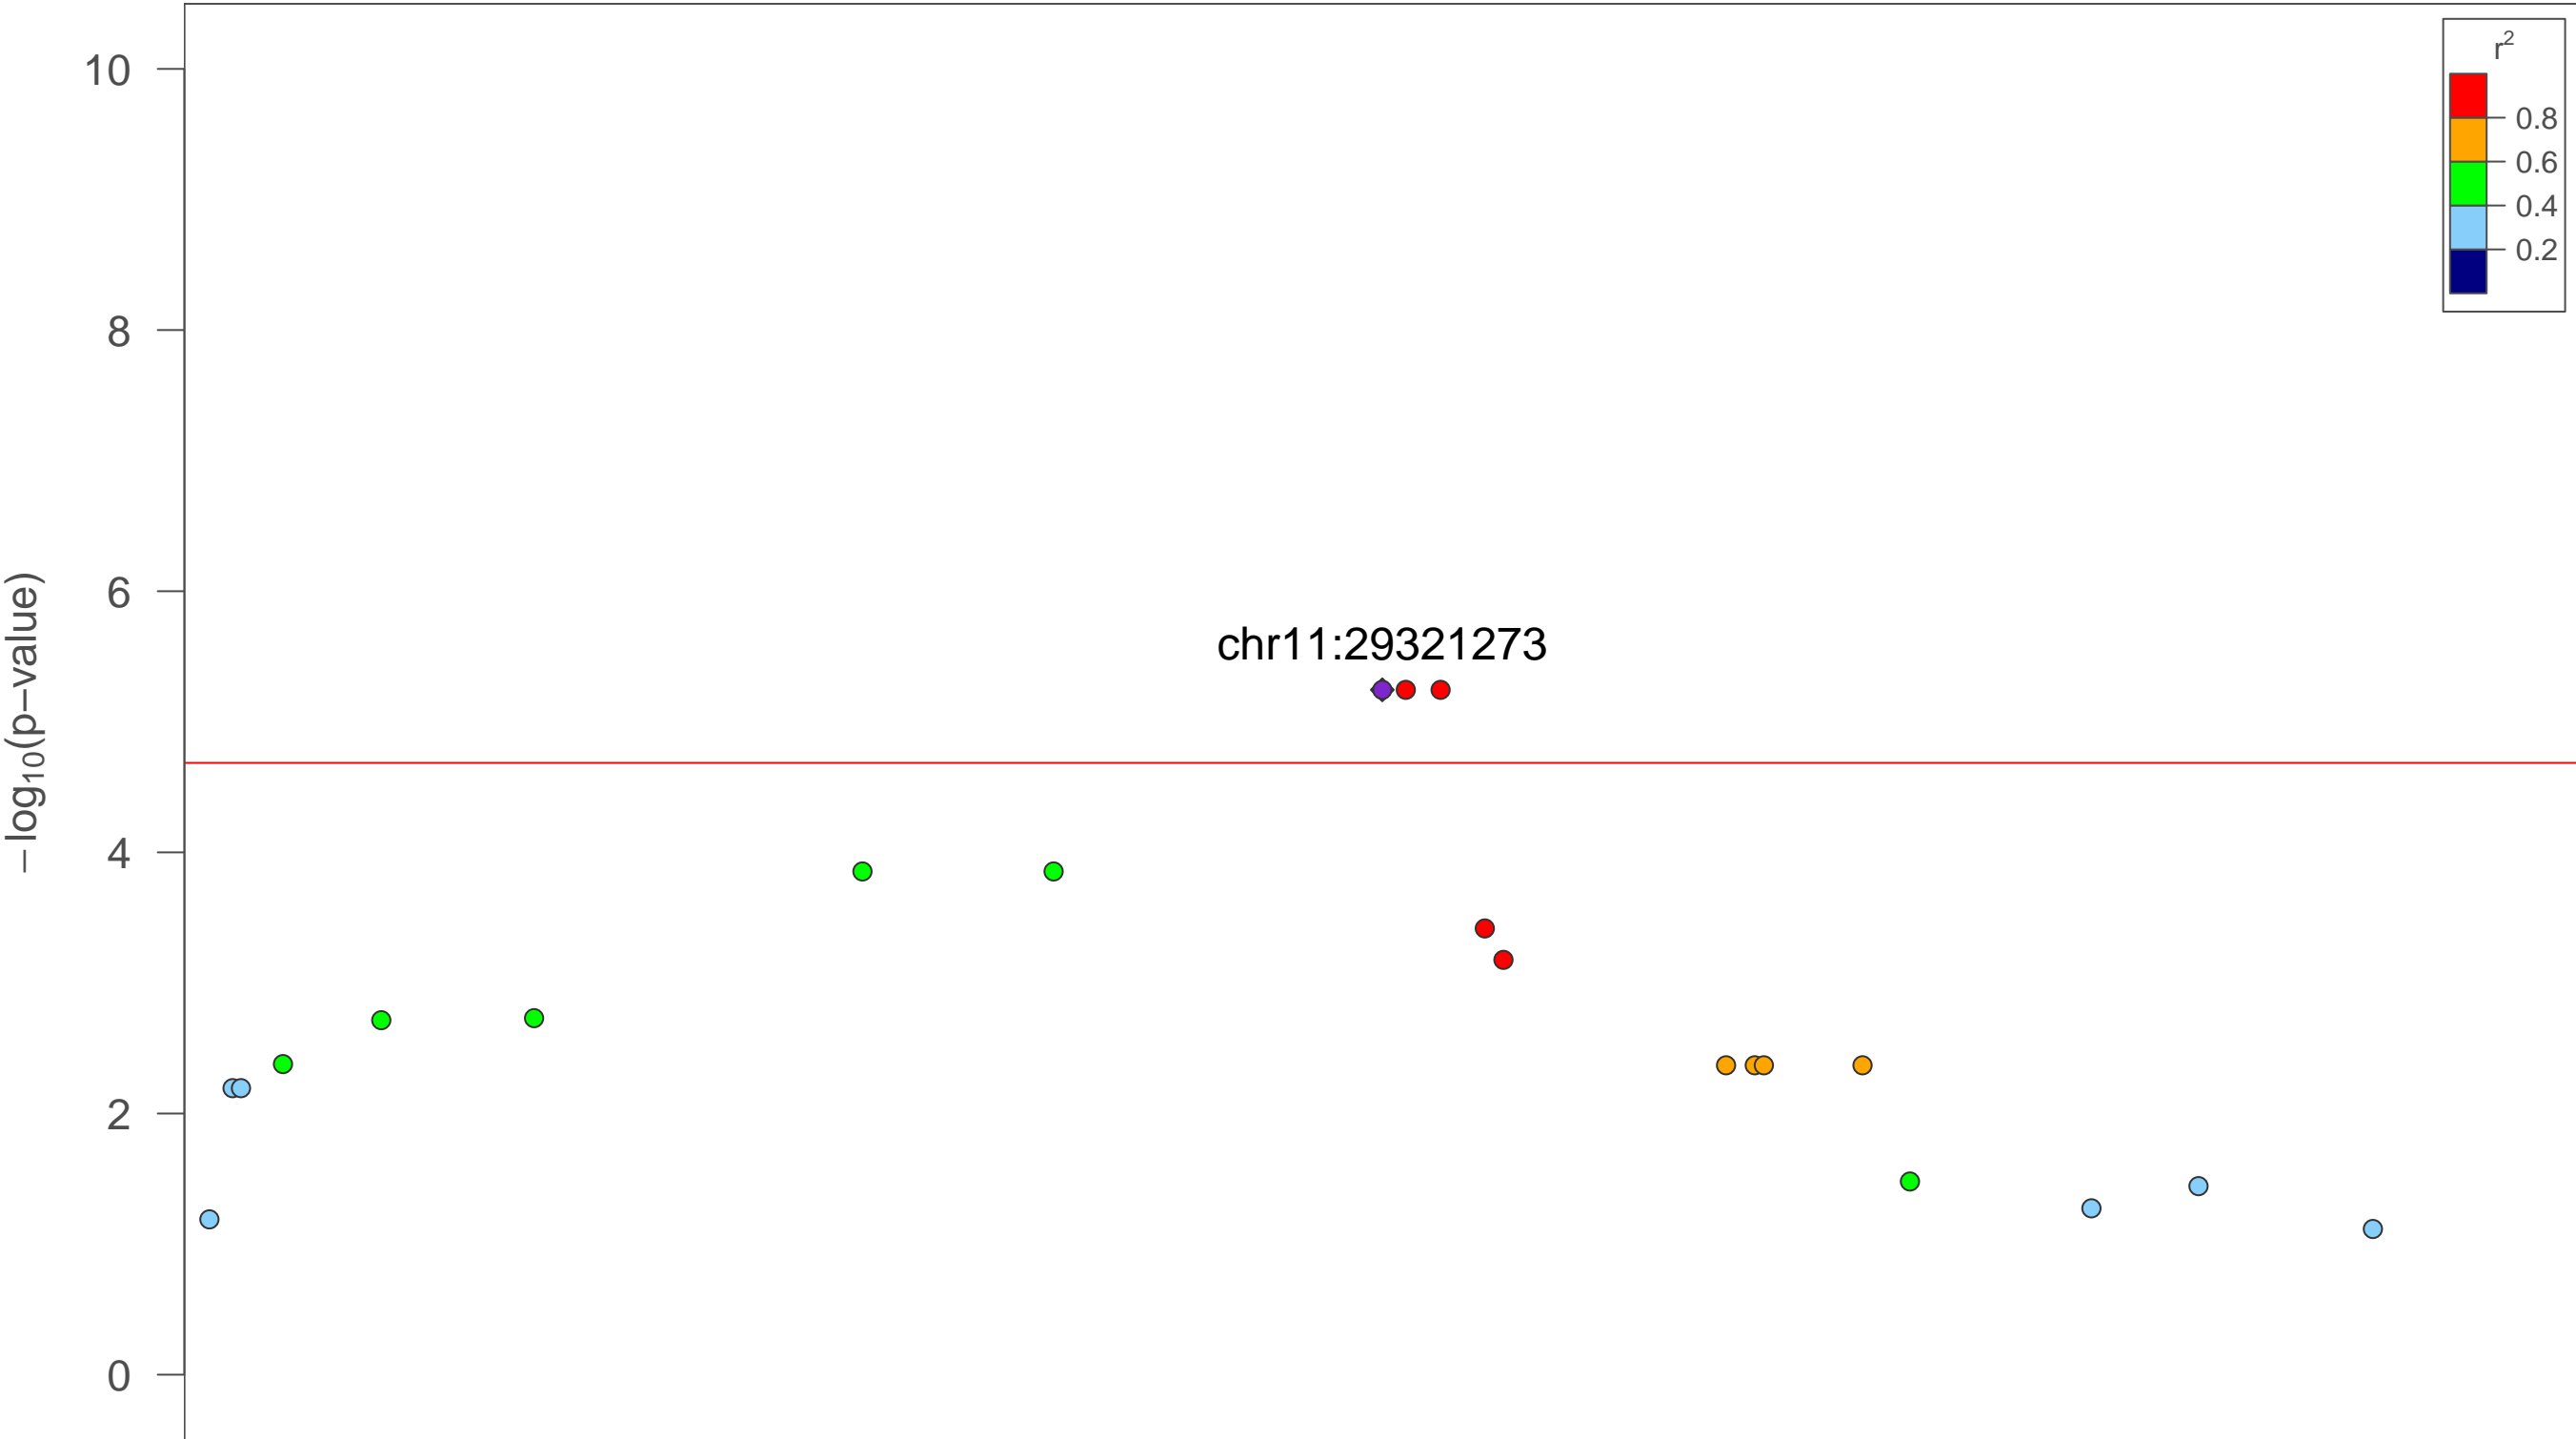

Credible Set

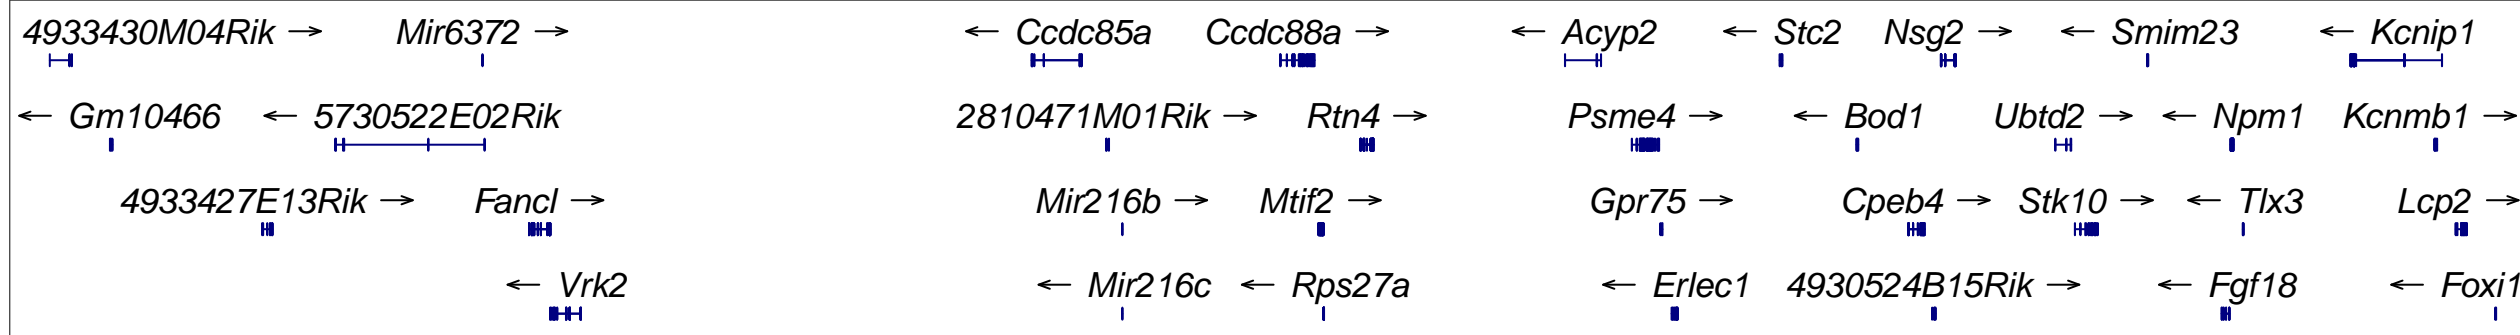

34 genes  
omitted



date: Thu Oct 25 16:56:07 2018  
build: F34Array  
display range: chr11:24321273–34321273 [24321273–34321273]  
hilite range: 0 – 0 [ 0 – 0 ]  
reference SNP: chr11:29321273  
number of SNPs plotted: 22  
min P-value: 5.69E–6 [chr11:29321273]  
max P-value: 7.66E–2 [chr11:33455345]  
omitted Genes: Gm12070, Mir216a, Mir217  
omitted Genes: Efemp1, Pnpt1, Smek2  
omitted Genes: Cfap36, Prorsd1, Clhc1  
omitted Genes: Eml6, 4931440F15Rik, Sptbn1  
omitted Genes: 4930505A04Rik, Asb3, Chac2  
omitted Genes: D630024D03Rik, Gm12108, Il9r  
omitted Genes: Snrnp25, Rhbdf1, Mpg  
omitted Genes: Nprl3, Hba–x, Hba–a1  
omitted Genes: Hbq1b, Hba–a2, Hbq1a  
omitted Genes: Sh3pxd2b, Efcab9, Fbxw11  
omitted Genes: Ranbp17, Gabrp, Dock2  
omitted Genes: Fam196b

Fine-mapping Regions

| snp            | chr | pos (Mb) | pp        | group        | color  |
|----------------|-----|----------|-----------|--------------|--------|
| chr11:29321273 | 11  | 29.32127 | 0.3300716 | Credible Set | purple |
| chr11:29419287 | 11  | 29.41929 | 0.3300716 | Credible Set | purple |
| chr11:29564549 | 11  | 29.56455 | 0.3300716 | Credible Set | purple |

### F34 Array, quadriceps femoris muscle weight (mg)

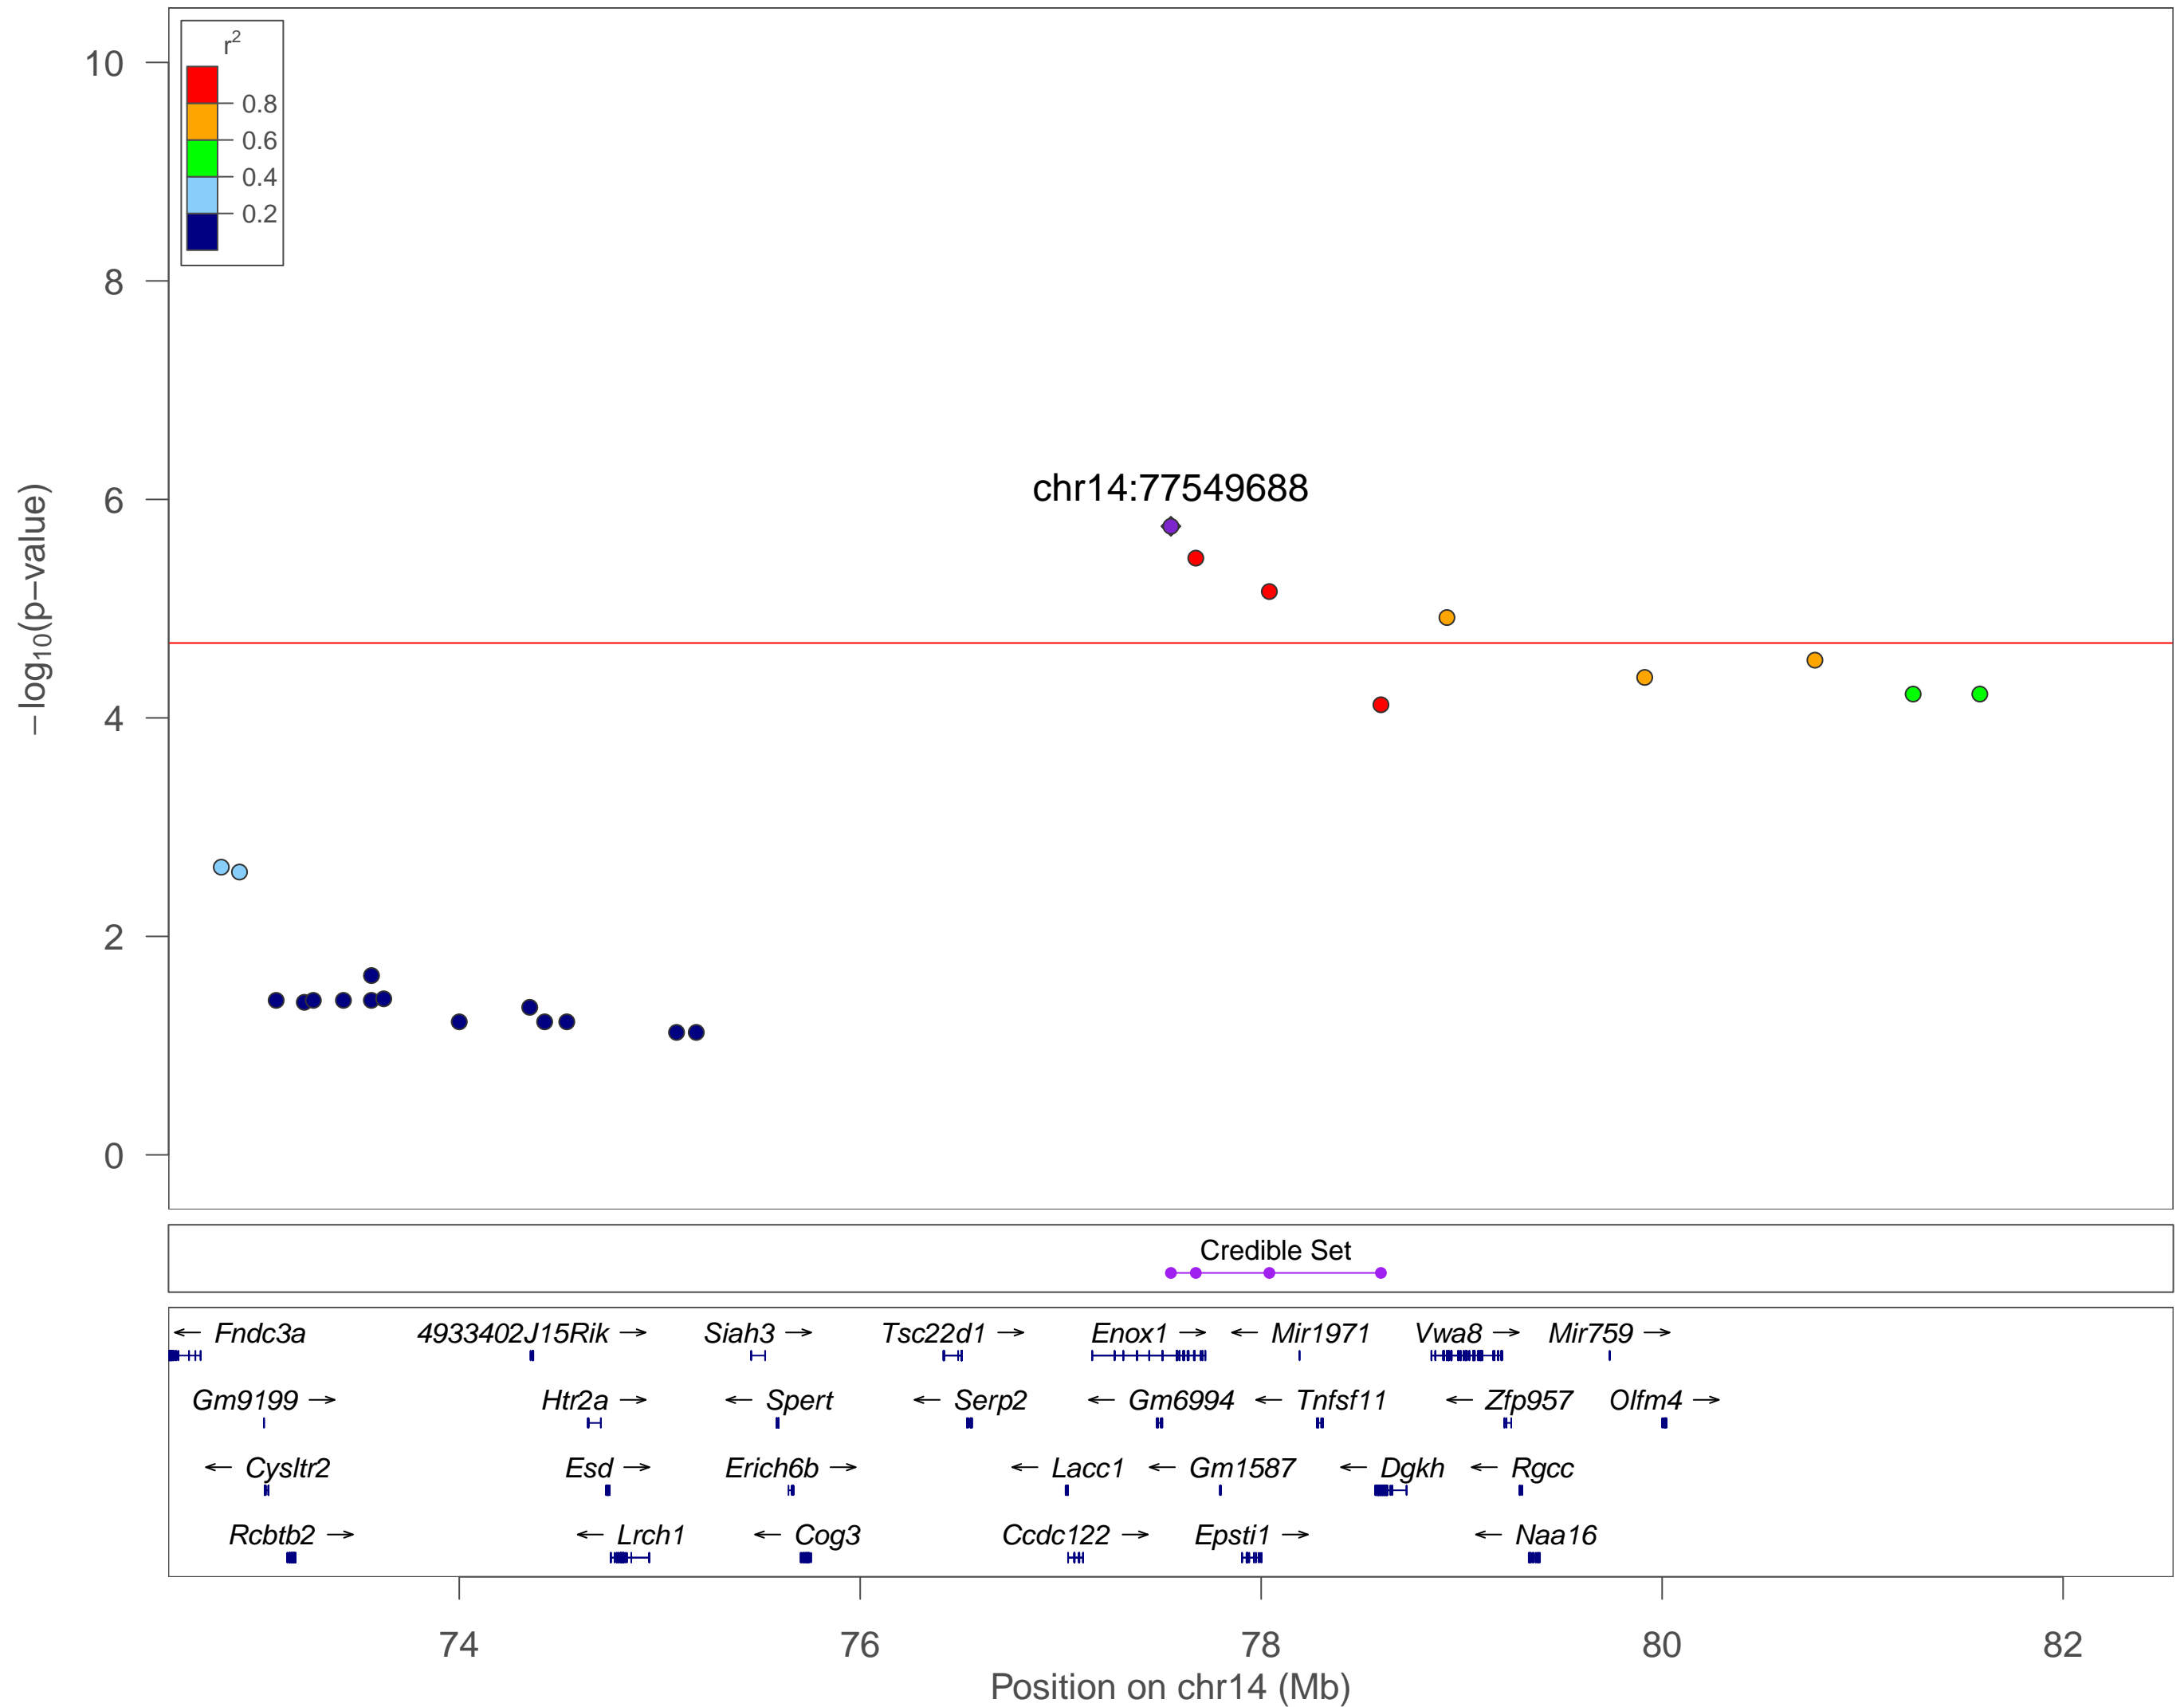

date: Thu Oct 25 16:56:20 2018  
build: F34Array  
display range: chr14:72549688–82549688 [72549688–82549688]  
hilite range: 0 – 0 [ 0 – 0 ]  
reference SNP: chr14:77549688  
number of SNPs plotted: 25  
min P-value: 1.76E–6 [chr14:77549688]  
max P-value: 7.57E–2 [chr14:75083773]  
omitted Genes: Rb1, Mir687, Lpar6  
omitted Genes: Itm2b, Med4, Nudt15  
omitted Genes: Sucla2, Gm4278, 5031414D18Rik  
omitted Genes: Lrrc63, Lcp1, Cpb2  
omitted Genes: Zc3h13, Slc25a30, Gm4285  
omitted Genes: Tpt1, Snora31, Gtf2f2  
omitted Genes: Kctd4, Gpalpp1, Nufip1  
omitted Genes: 4930444M15Rik, 1700108F19Rik, Dnajc15  
omitted Genes: Fam216b, Akap11, Mtrf1  
omitted Genes: Kbtbd7, Kbtbd6, Wbp4  
omitted Genes: Elf1, Sugt1, Lect1  
omitted Genes: 4930452G13Rik, Pcdh8, Gm10845

Fine-mapping Regions

| snp            | chr | pos (Mb) | pp         | group        | color  |
|----------------|-----|----------|------------|--------------|--------|
| chr14:77549688 | 14  | 77.54969 | 0.54938496 | Credible Set | purple |
| chr14:77673987 | 14  | 77.67399 | 0.28854246 | Credible Set | purple |
| chr14:78040815 | 14  | 78.04081 | 0.14690307 | Credible Set | purple |
| chr14:78597230 | 14  | 78.59723 | 0.01516952 | Credible Set | purple |

# F34 Array, tibialis anterior muscle weight (mg)

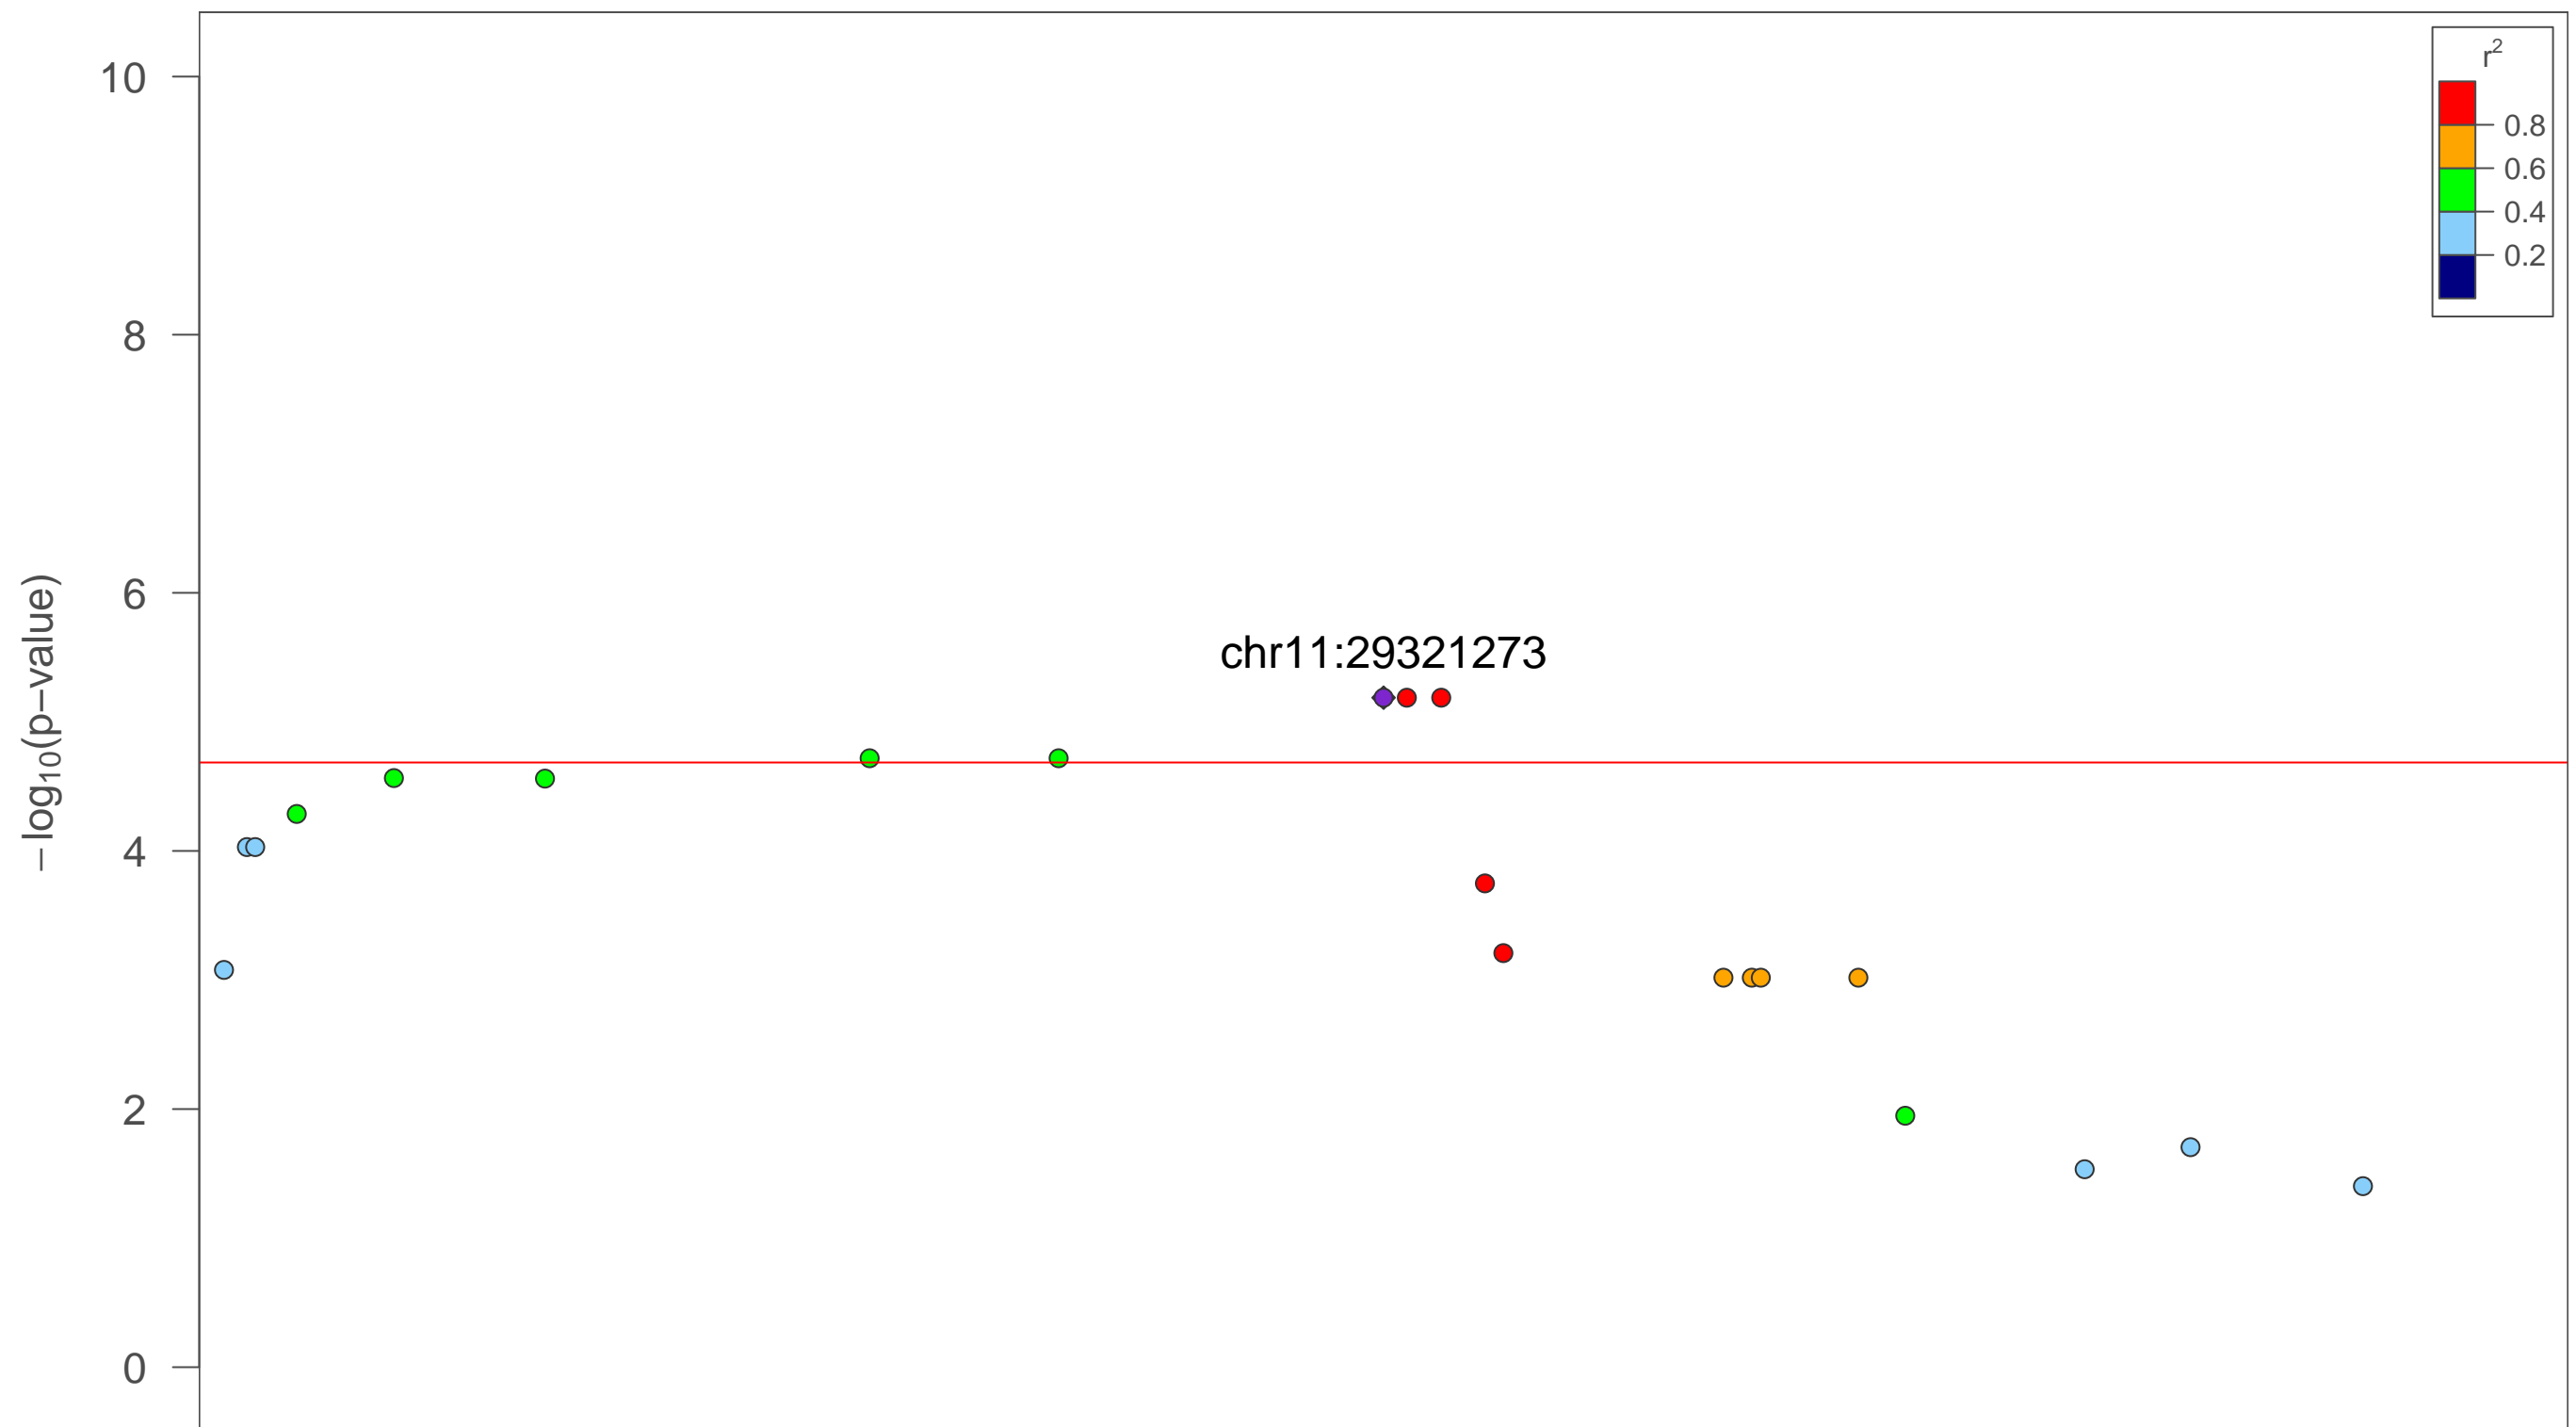

Credible Set

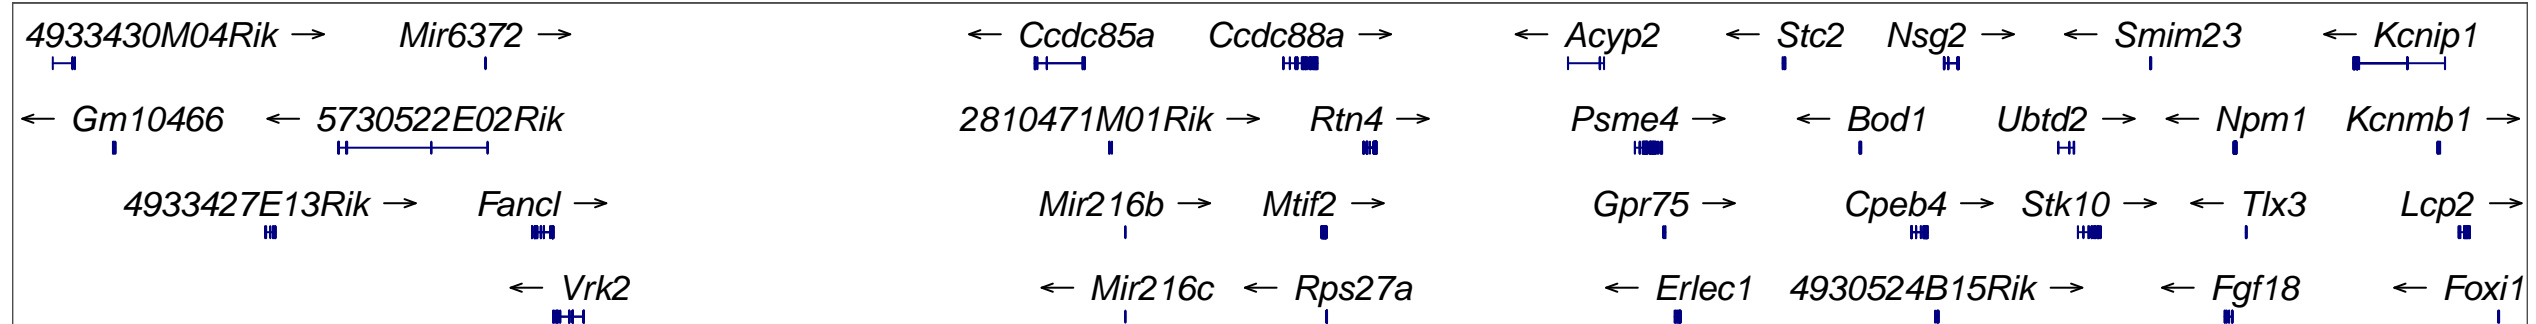

34 genes  
omitted

26

28

30

32

34

Position on chr11 (Mb)

date: Thu Oct 25 16:56:49 2018  
build: F34Array  
display range: chr11:24321273–34321273 [24321273–34321273]  
hilite range: 0 – 0 [ 0 – 0 ]  
reference SNP: chr11:29321273  
number of SNPs plotted: 22  
min P-value: 6.49E–6 [chr11:29321273]  
max P-value: 3.95E–2 [chr11:33455345]  
omitted Genes: Gm12070, Mir216a, Mir217  
omitted Genes: Efemp1, Pnpt1, Smek2  
omitted Genes: Cfap36, Prorsd1, Clhc1  
omitted Genes: Eml6, 4931440F15Rik, Sptbn1  
omitted Genes: 4930505A04Rik, Asb3, Chac2  
omitted Genes: D630024D03Rik, Gm12108, Il9r  
omitted Genes: Snrnp25, Rhbdf1, Mpg  
omitted Genes: Nprl3, Hba–x, Hba–a1  
omitted Genes: Hbq1b, Hba–a2, Hbq1a  
omitted Genes: Sh3pxd2b, Efcab9, Fbxw11  
omitted Genes: Ranbp17, Gabrp, Dock2  
omitted Genes: Fam196b

Fine-mapping Regions

| snp            | chr | pos (Mb) | pp         | group        | color  |
|----------------|-----|----------|------------|--------------|--------|
| chr11:29321273 | 11  | 29.32127 | 0.32717292 | Credible Set | purple |
| chr11:29419287 | 11  | 29.41929 | 0.32717292 | Credible Set | purple |
| chr11:29564549 | 11  | 29.56455 | 0.32717292 | Credible Set | purple |
| chr11:29749029 | 11  | 29.74903 | 0.01408268 | Credible Set | purple |



# F34 Array, extensor digitorum longus muscle weight (mg)

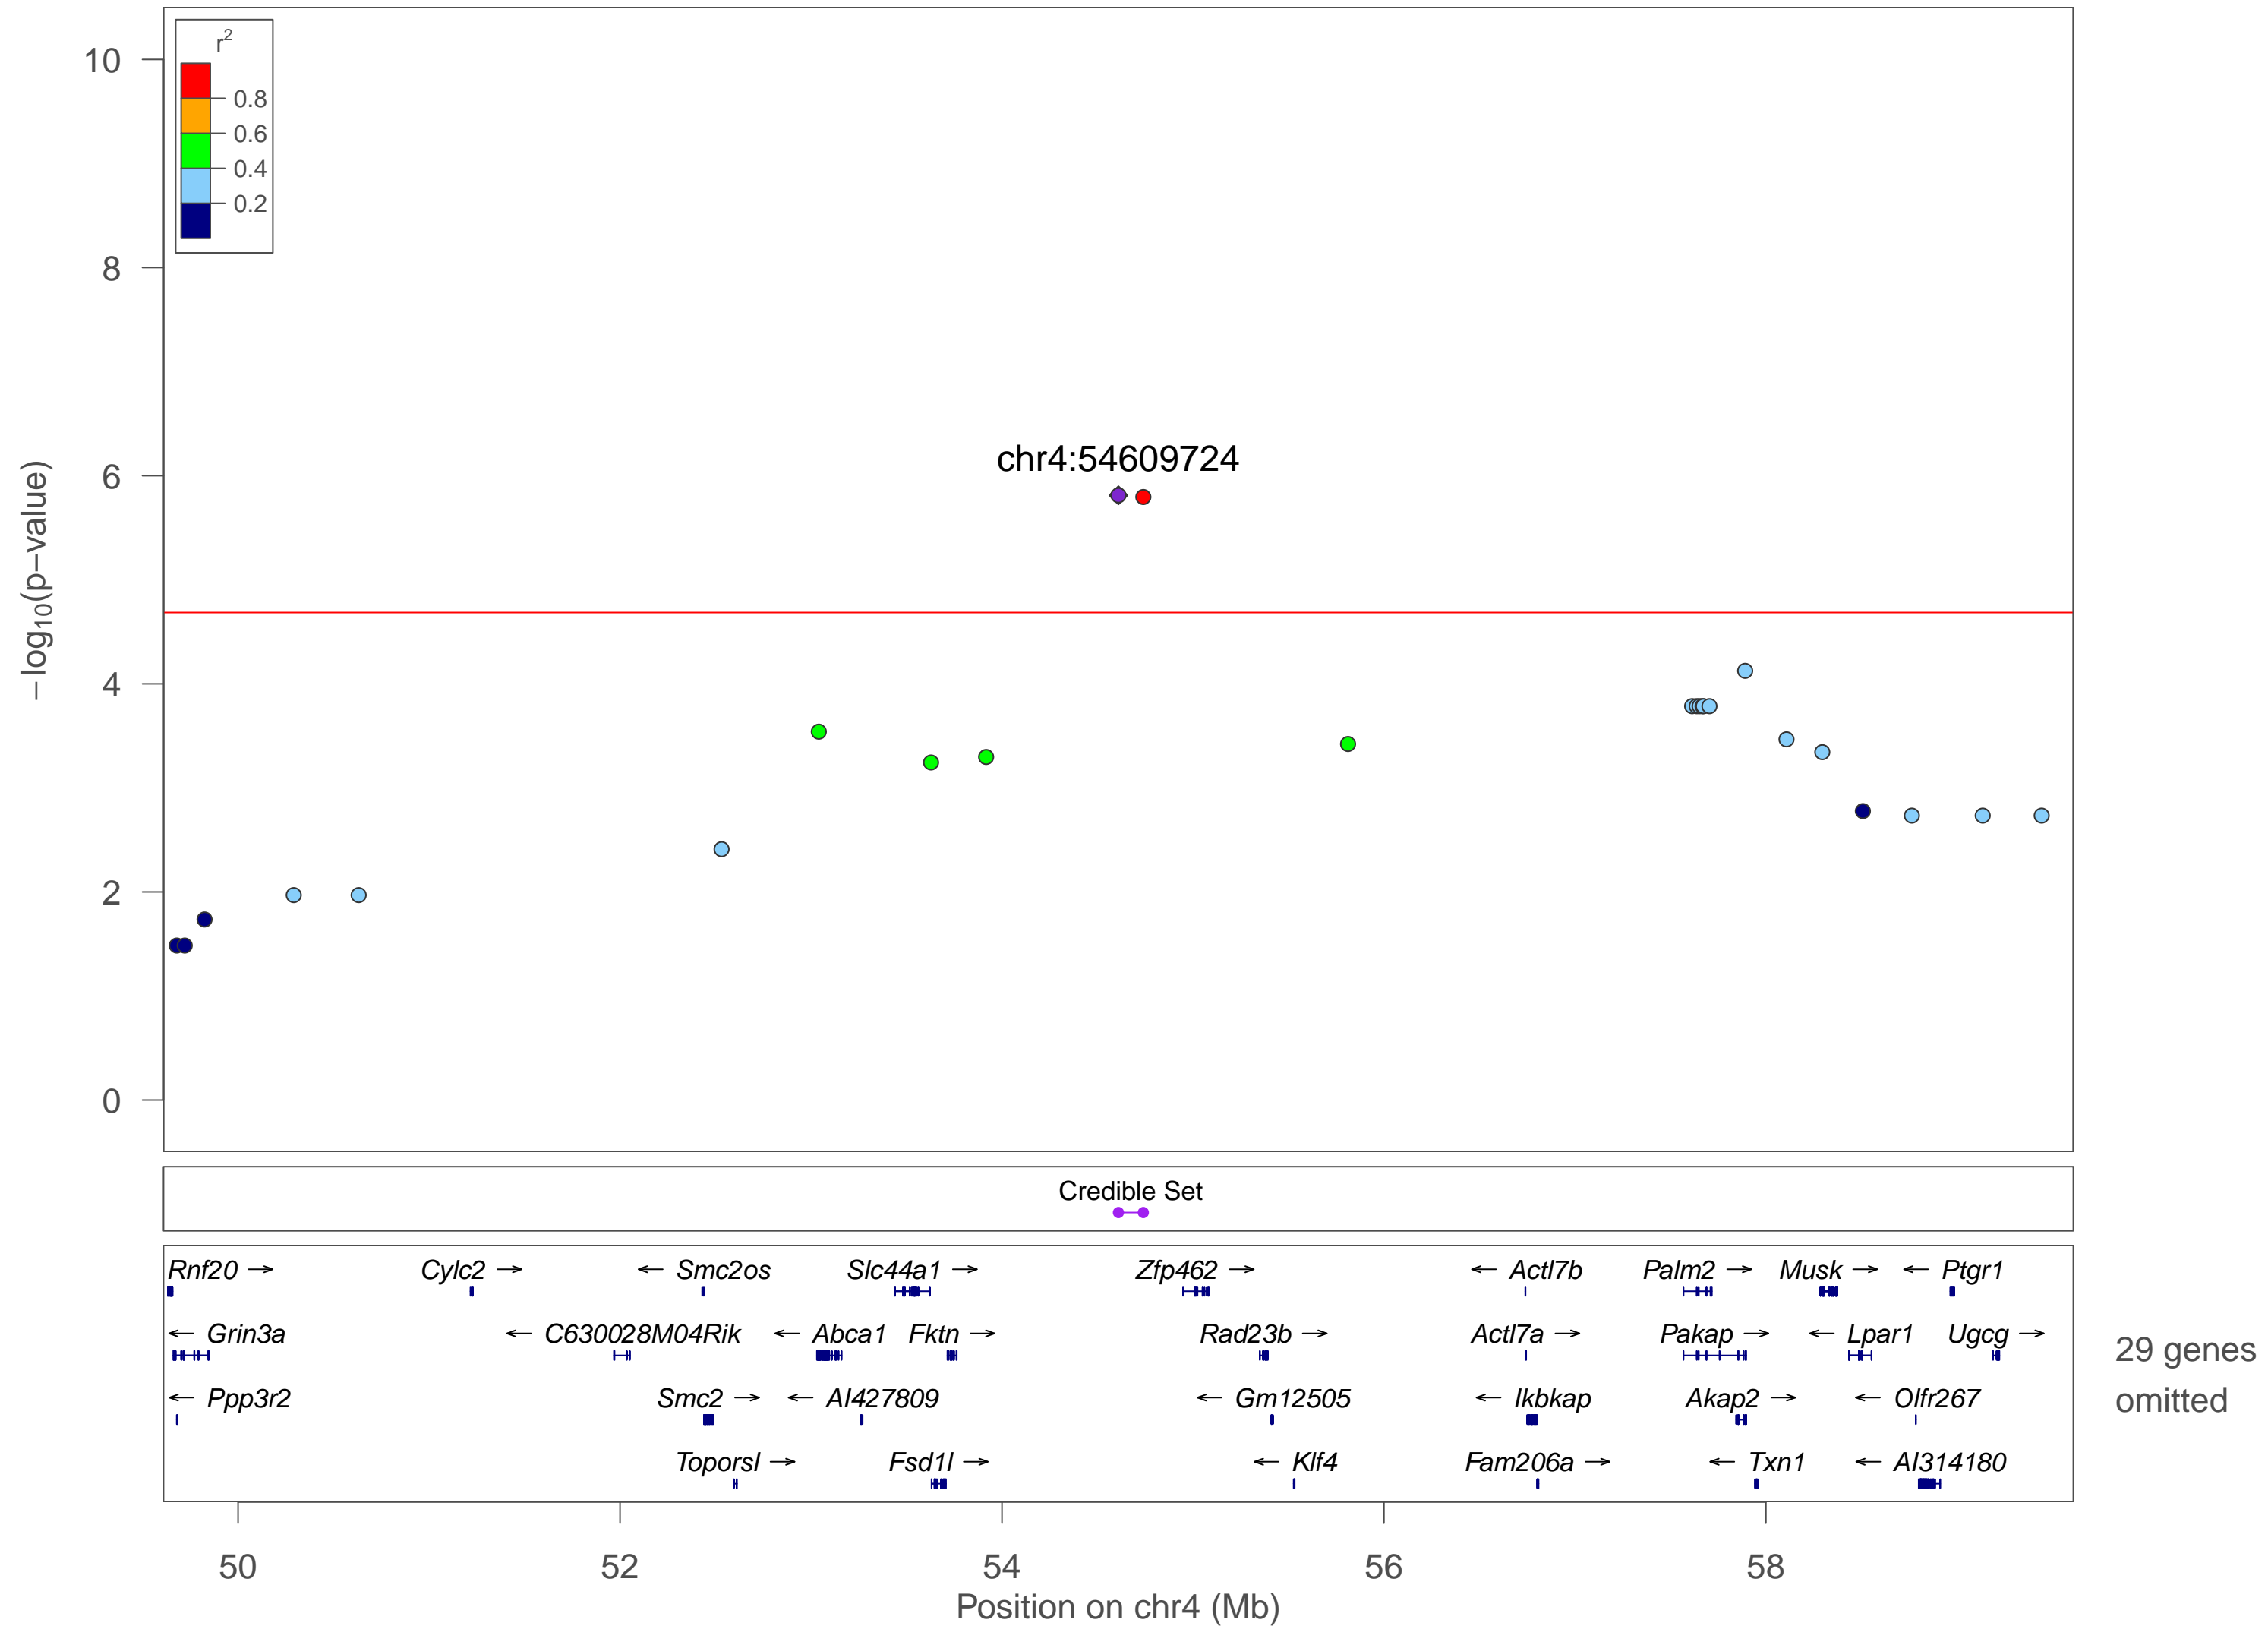

date: Thu Oct 25 16:56:56 2018  
build: F34Array  
display range: chr4:49609724–59609724 [49609724–59609724]  
hilite range: 0 – 0 [ 0 – 0 ]  
reference SNP: chr4:54609724  
number of SNPs plotted: 26  
min P-value: 1.54E–6 [chr4:54609724]  
max P-value: 3.27E–2 [chr4:49679066]  
omitted Genes: 4930552N02Rik, Olfr275, Olfr273  
omitted Genes: Olfr272, Olfr270, Nipsnap3a  
omitted Genes: Nipsnap3b, 4930522O17Rik, Tal2  
omitted Genes: Tmem38b, Cttna1, Tmem245  
omitted Genes: Mir32, Frrs1l, Epb41l4b  
omitted Genes: Gm12530, Ptpn3, 1700042G15Rik  
omitted Genes: D630039A03Rik, Txndc8, Slep1  
omitted Genes: Mir3095, Zkscan16, Dnajc25  
omitted Genes: Gng10, Gm12596, Susd1  
omitted Genes: Ptbp3, Hsdl2

Fine-mapping Regions

| snp           | chr | pos (Mb) | pp        | group        | color  |
|---------------|-----|----------|-----------|--------------|--------|
| chr4:54609724 | 4   | 54.60972 | 0.5090756 | Credible Set | purple |
| chr4:54740078 | 4   | 54.74008 | 0.4909244 | Credible Set | purple |

# F34 Array, gastrocnemius muscle weight (mg)

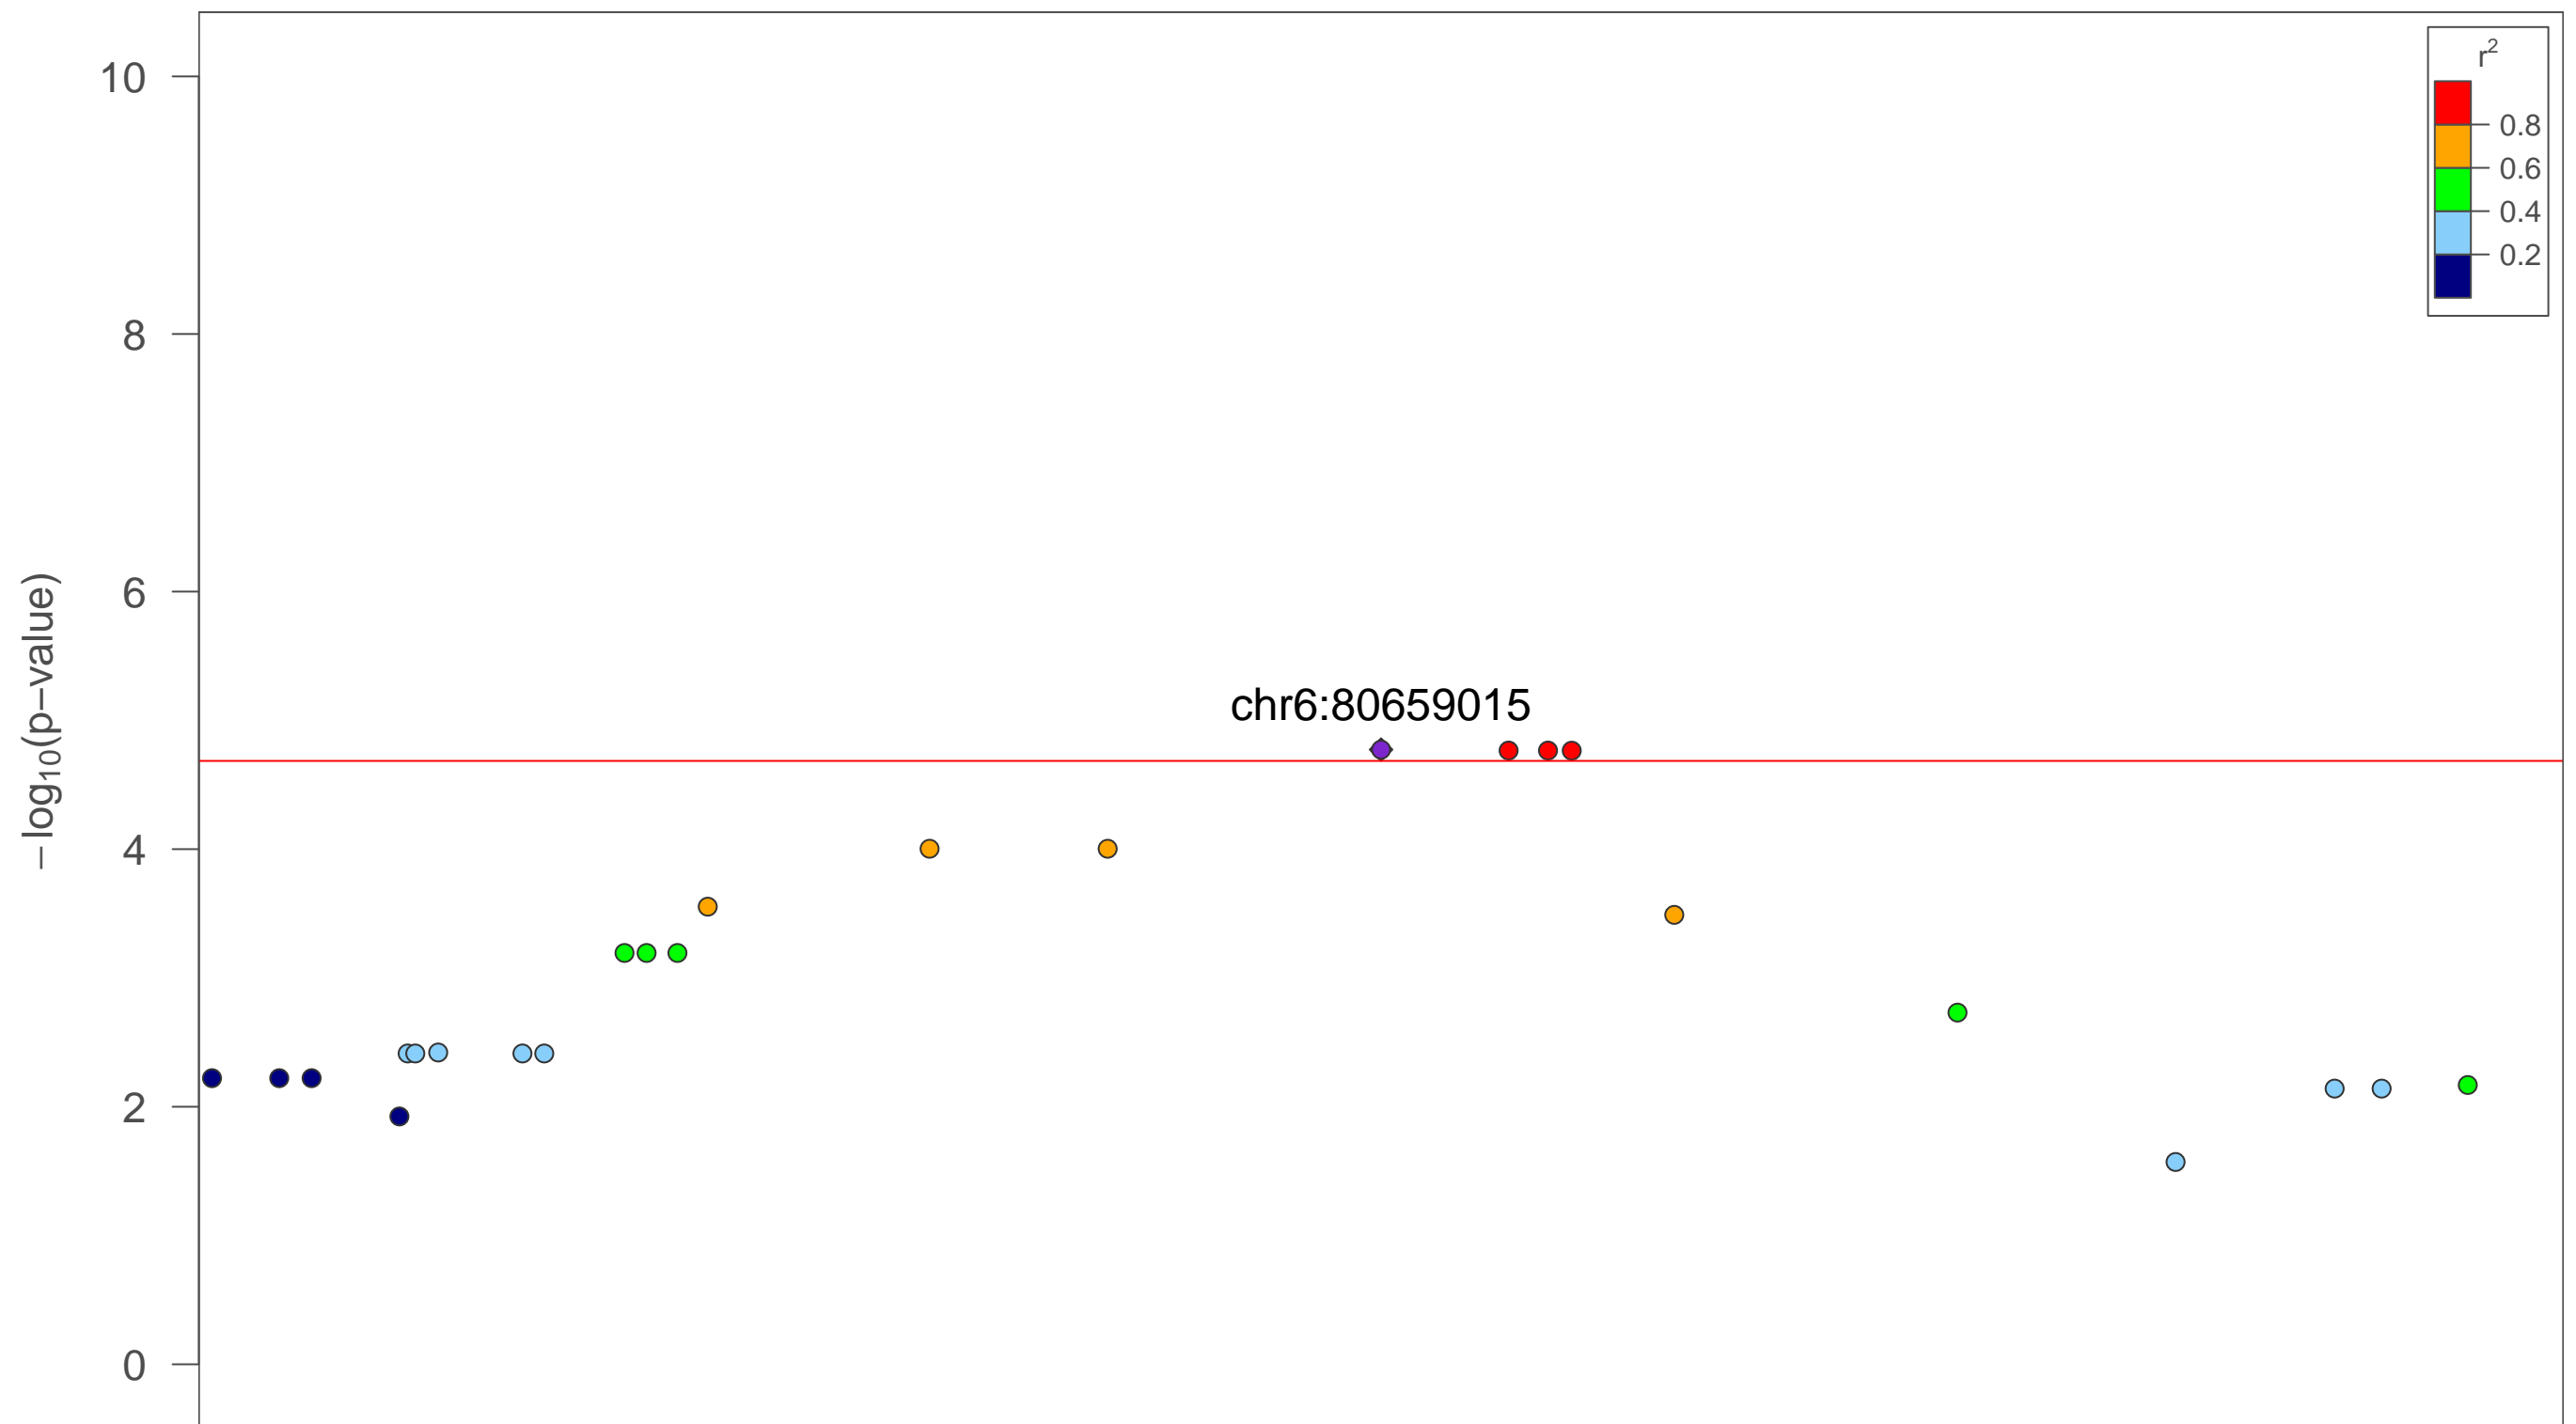

Credible Set

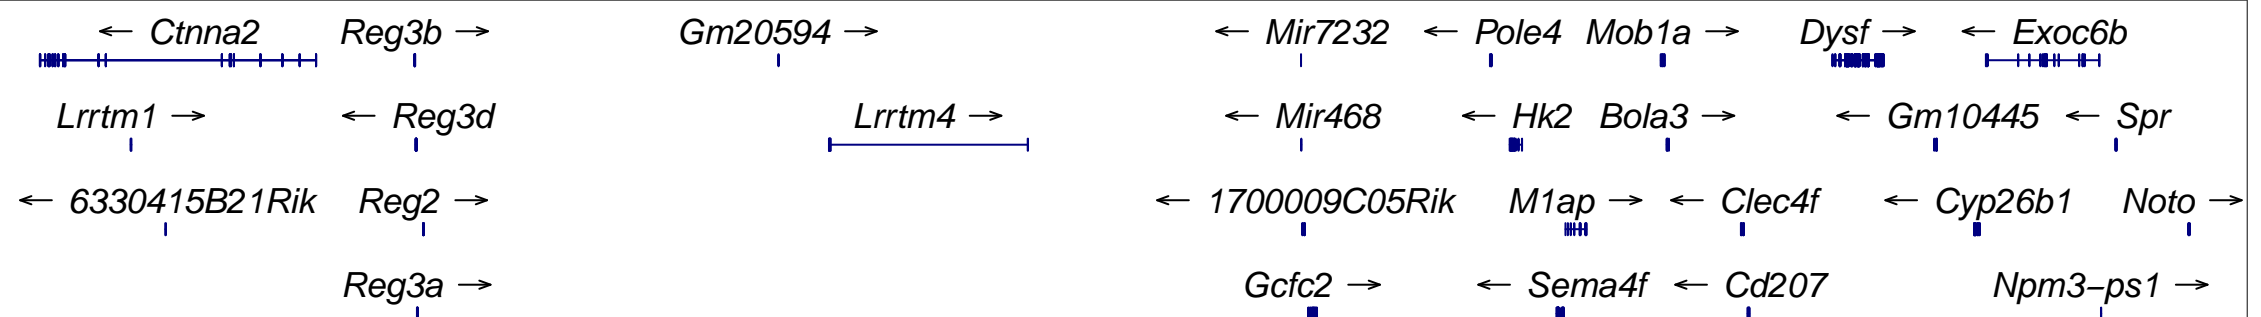

56 genes  
omitted

date: Thu Oct 25 16:57:03 2018  
build: F34Array  
display range: chr6:75659015–85659015 [75659015–85659015]  
hilite range: 0 – 0 [ 0 – 0 ]  
reference SNP: chr6:80659015  
number of SNPs plotted: 26  
min P-value: 1.69E–5 [chr6:80659015]  
max P-value: 2.68E–2 [chr6:84018933]  
omitted Genes: Reg1, Reg3g, Gm20362  
omitted Genes: Mrpl19, Eva1a, Tacr1  
omitted Genes: 2310069B03Rik, Dok1, Loxl3  
omitted Genes: Mir7040, Htra2, Aup1  
omitted Genes: Dqx1, Tlx2, Pcgf1  
omitted Genes: Lbx2, Mir3470a, Ccdc142  
omitted Genes: Mrpl53, Mogs, Wbp1  
omitted Genes: Ino80b, Rtkn, Wdr54  
omitted Genes: 1700003E16Rik, Dctn1, Slc4a5  
omitted Genes: Mthfd2, Tet3, Mir6374  
omitted Genes: B230319C09Rik, Dguok, Actg2  
omitted Genes: Stambp, Gm21284, Vax2os  
omitted Genes: Vax2, Atp6v1b1, 1700124L16Rik  
omitted Genes: Ankrd53, Tex261, Gm7443  
omitted Genes: Nagk, Paip2b, Zfp638  
omitted Genes: Gm5878, Emx1, Sfxn5  
omitted Genes: Rab11fip5, Mir705, Smyd5  
omitted Genes: Pradc1, Cct7, Fbxo41  
omitted Genes: Egr4, Alms1

Fine-mapping Regions

| snp           | chr | pos (Mb) | pp        | group        | color  |
|---------------|-----|----------|-----------|--------------|--------|
| chr6:80659015 | 6   | 80.65901 | 0.2530481 | Credible Set | purple |
| chr6:81198298 | 6   | 81.19830 | 0.2491541 | Credible Set | purple |
| chr6:81364957 | 6   | 81.36496 | 0.2491541 | Credible Set | purple |
| chr6:81465256 | 6   | 81.46526 | 0.2486437 | Credible Set | purple |

# F34 Array, soleus muscle weight (mg)

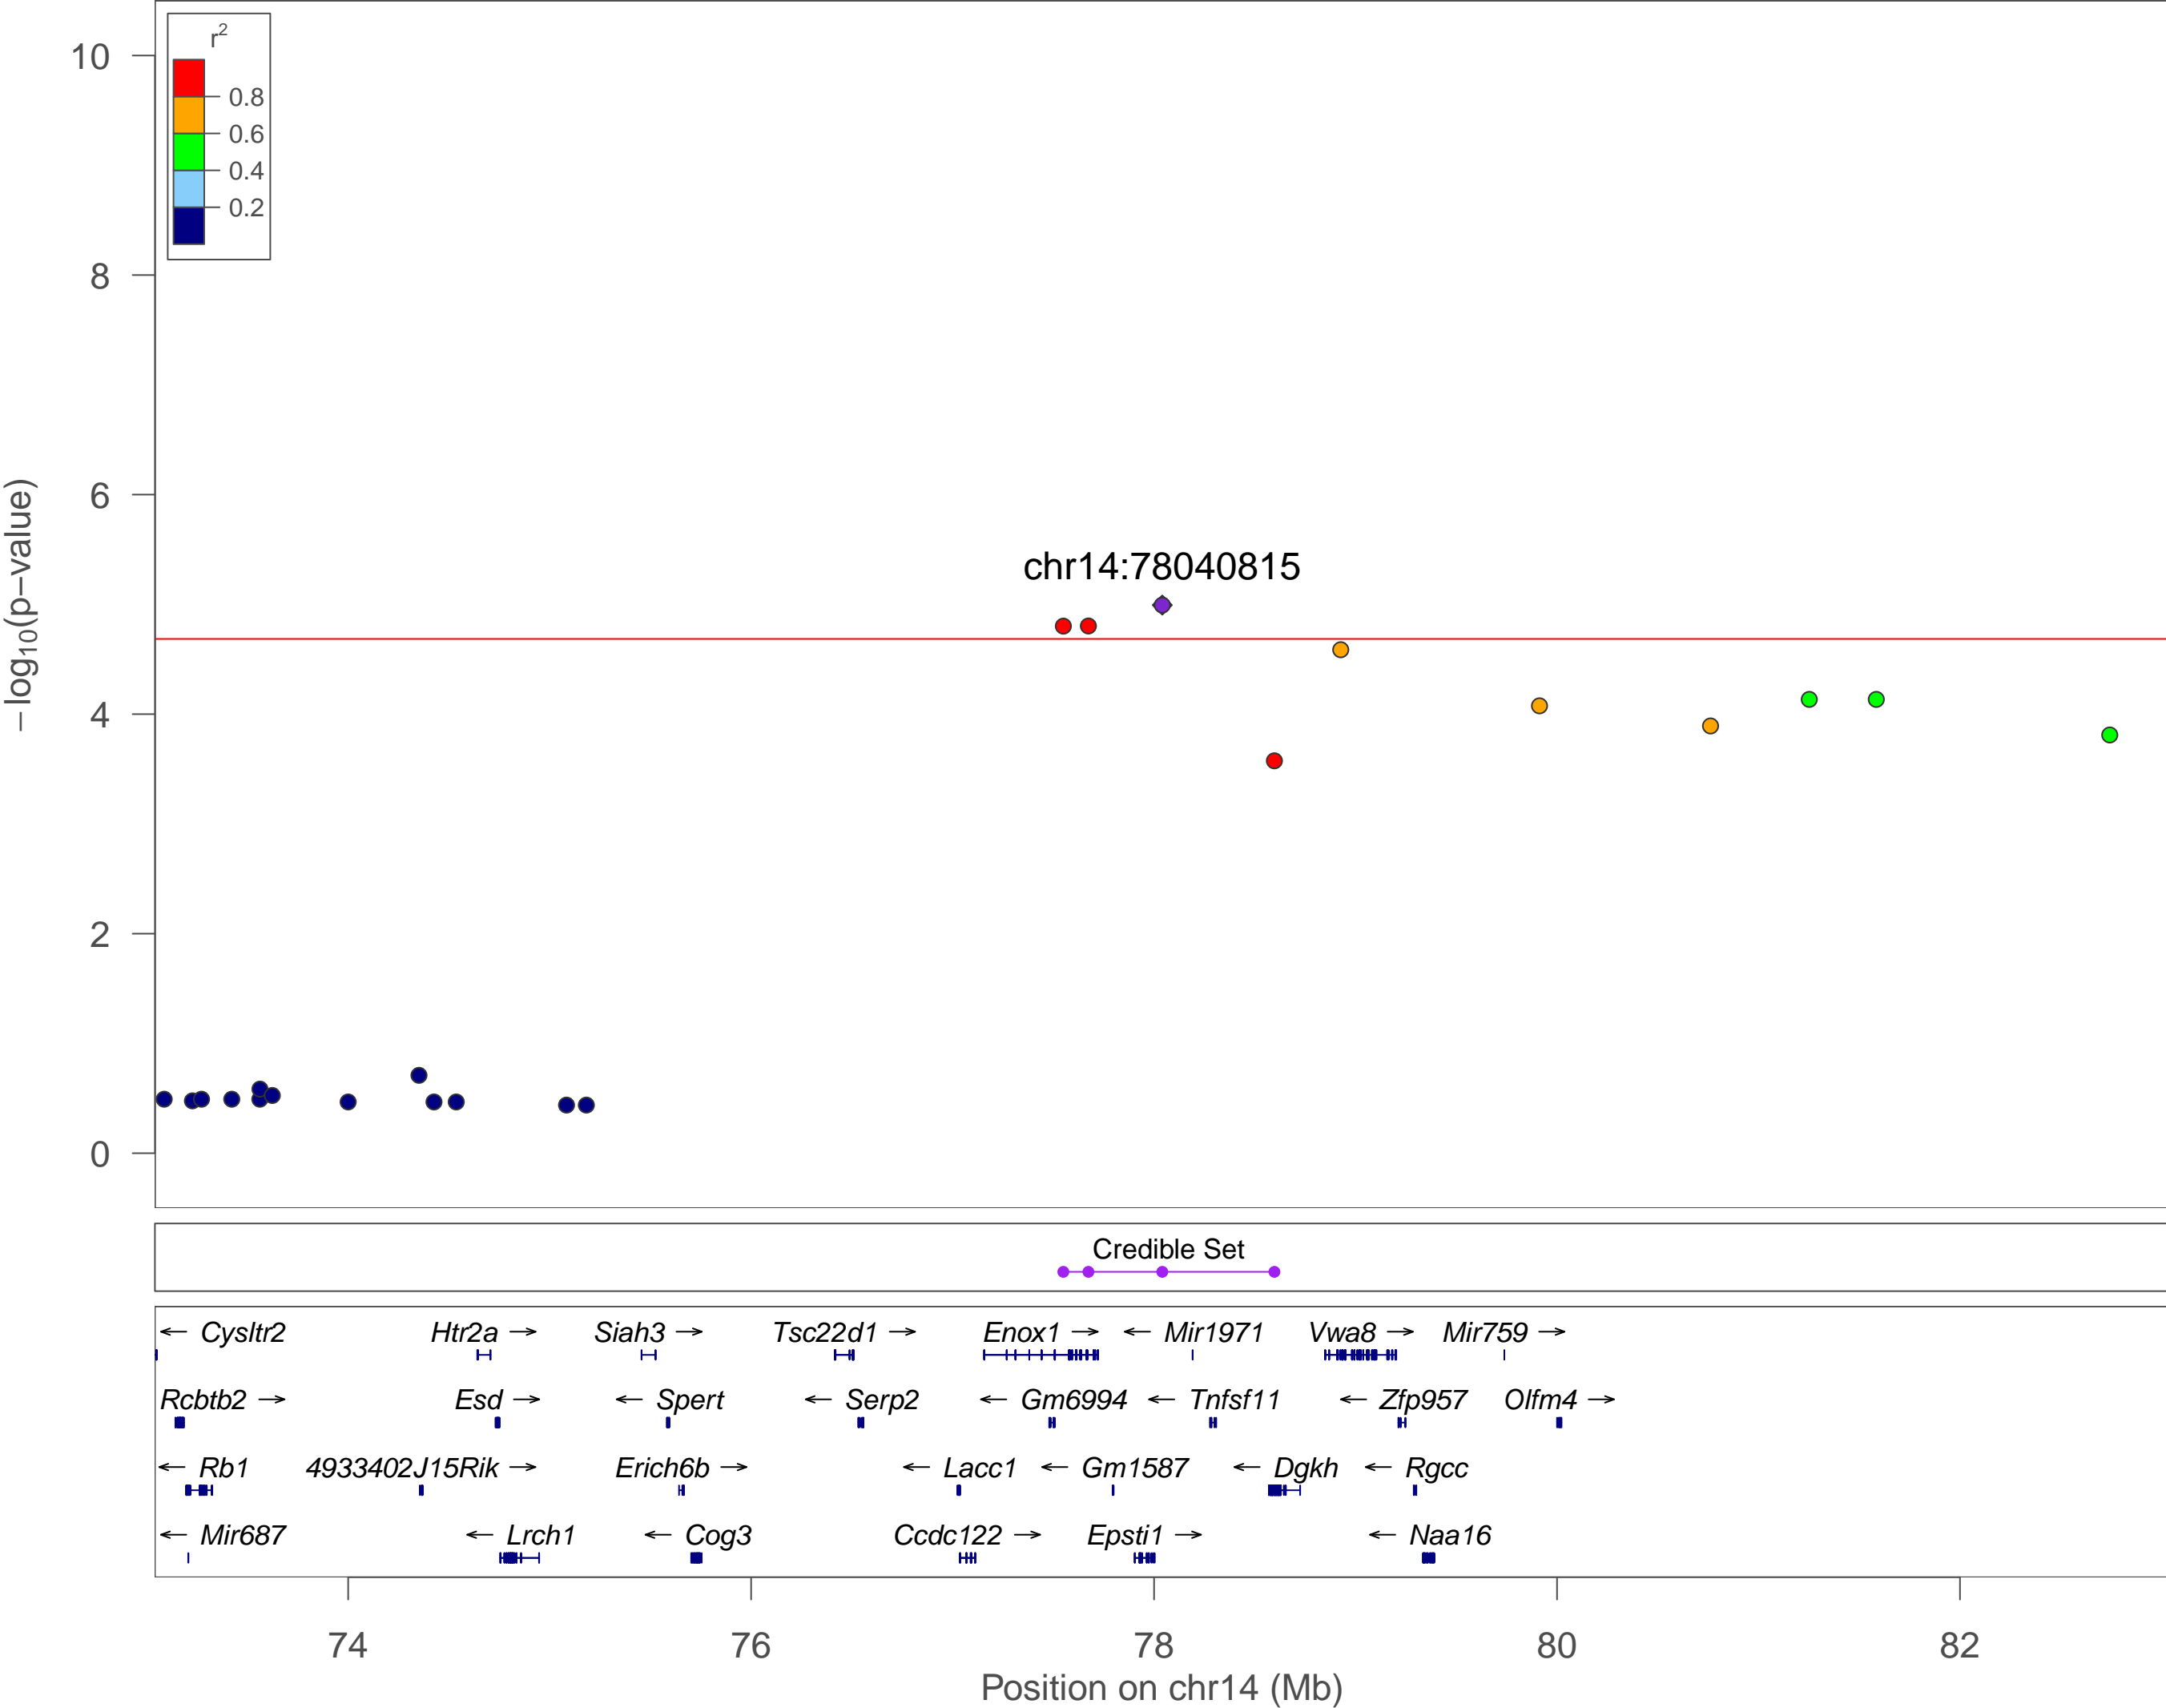

date: Thu Oct 25 16:57:10 2018  
build: F34Array  
display range: chr14:73040815–83040815 [73040815–83040815]  
hilite range: 0 – 0 [ 0 – 0 ]  
reference SNP: chr14:78040815  
number of SNPs plotted: 24  
min P-value: 1.01E–5 [chr14:78040815]  
max P-value: 3.64E–1 [chr14:75083773]  
omitted Genes: Lpar6, Itm2b, Med4  
omitted Genes: Nudt15, Sucla2, Gm4278  
omitted Genes: 5031414D18Rik, Lrrc63, Lcp1  
omitted Genes: Cpb2, Zc3h13, Slc25a30  
omitted Genes: Gm4285, Tpt1, Snora31  
omitted Genes: Gtf2f2, Kctd4, Gpalpp1  
omitted Genes: Nufip1, 4930444M15Rik, 1700108F19Rik  
omitted Genes: Dnajc15, Fam216b, Akap11  
omitted Genes: Mtrf1, Kbtbd7, Kbtbd6  
omitted Genes: Wbp4, Elf1, Sugt1  
omitted Genes: Lect1, 4930452G13Rik, Pcdh8  
omitted Genes: Gm10845



Fine-mapping Regions

| snp            | chr | pos (Mb) | pp        | group        | color  |
|----------------|-----|----------|-----------|--------------|--------|
| chr14:77549688 | 14  | 77.54969 | 0.2781654 | Credible Set | purple |
| chr14:77673987 | 14  | 77.67399 | 0.2789379 | Credible Set | purple |
| chr14:78040815 | 14  | 78.04081 | 0.4236906 | Credible Set | purple |
| chr14:78597230 | 14  | 78.59723 | 0.0192061 | Credible Set | purple |

F34, F39–43 GBS, body weight

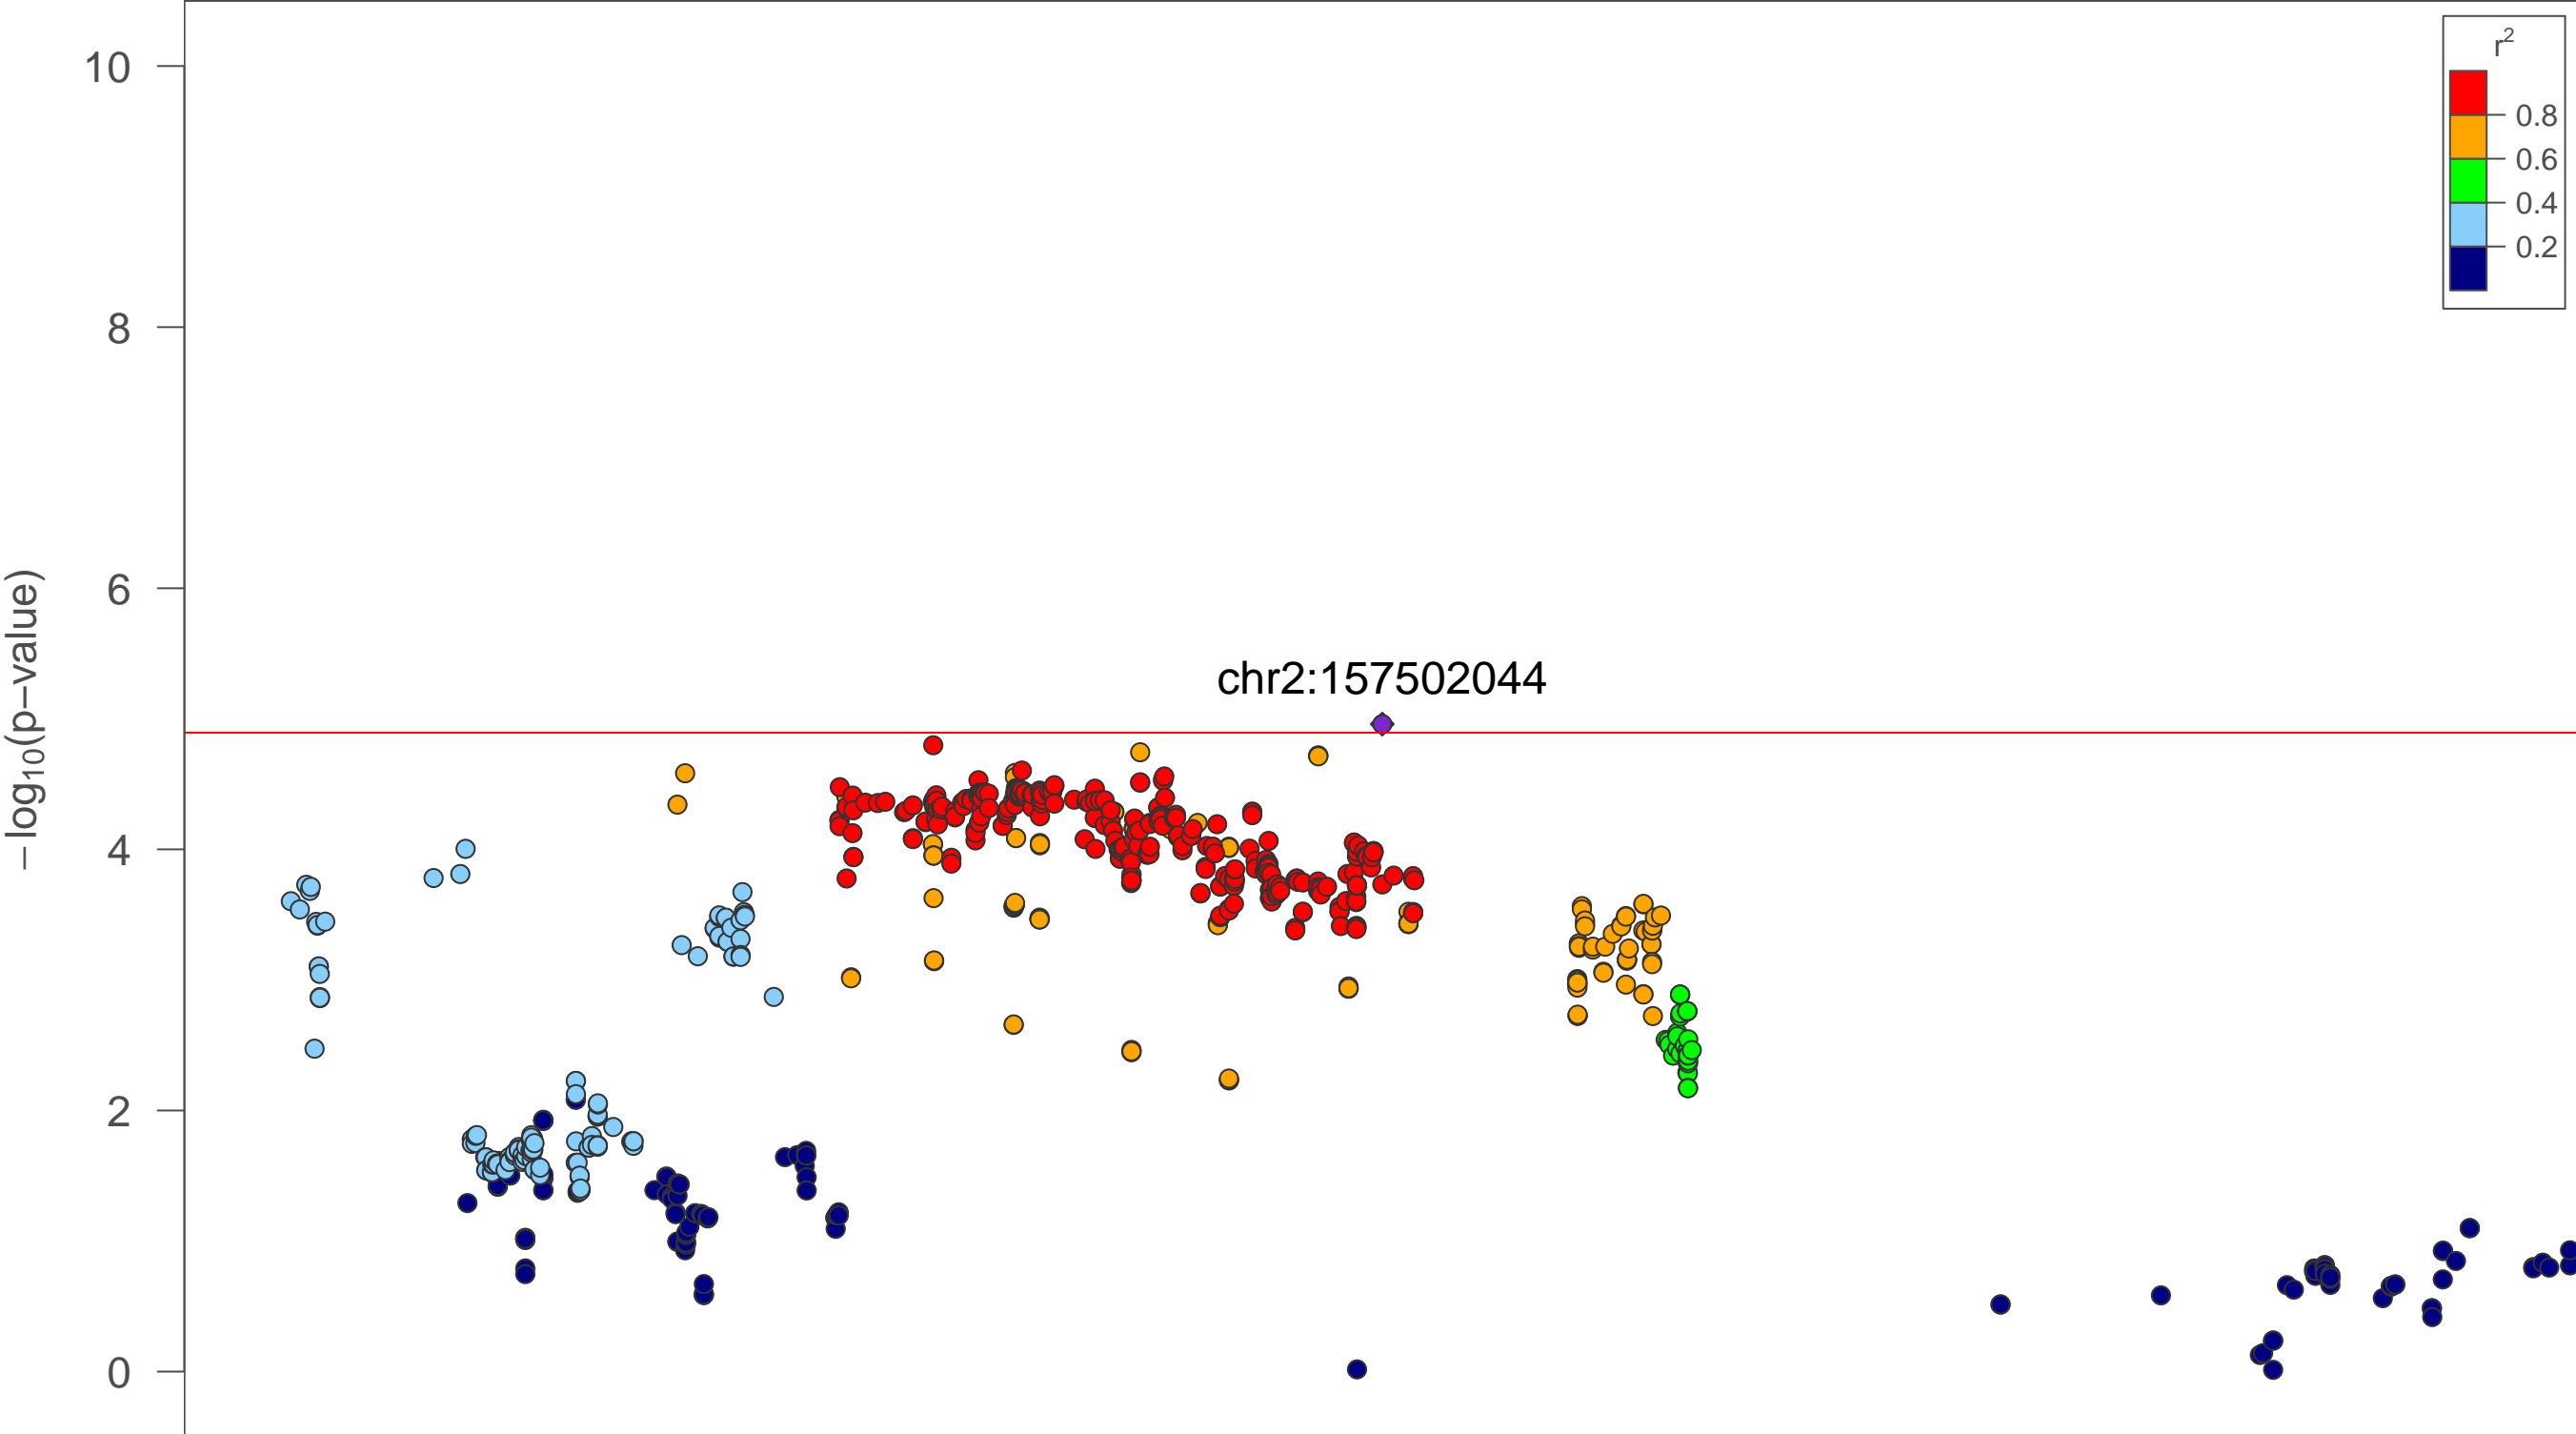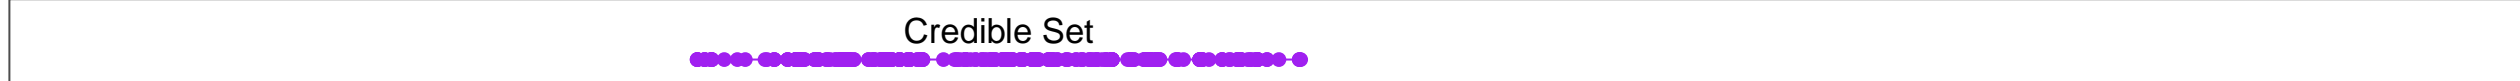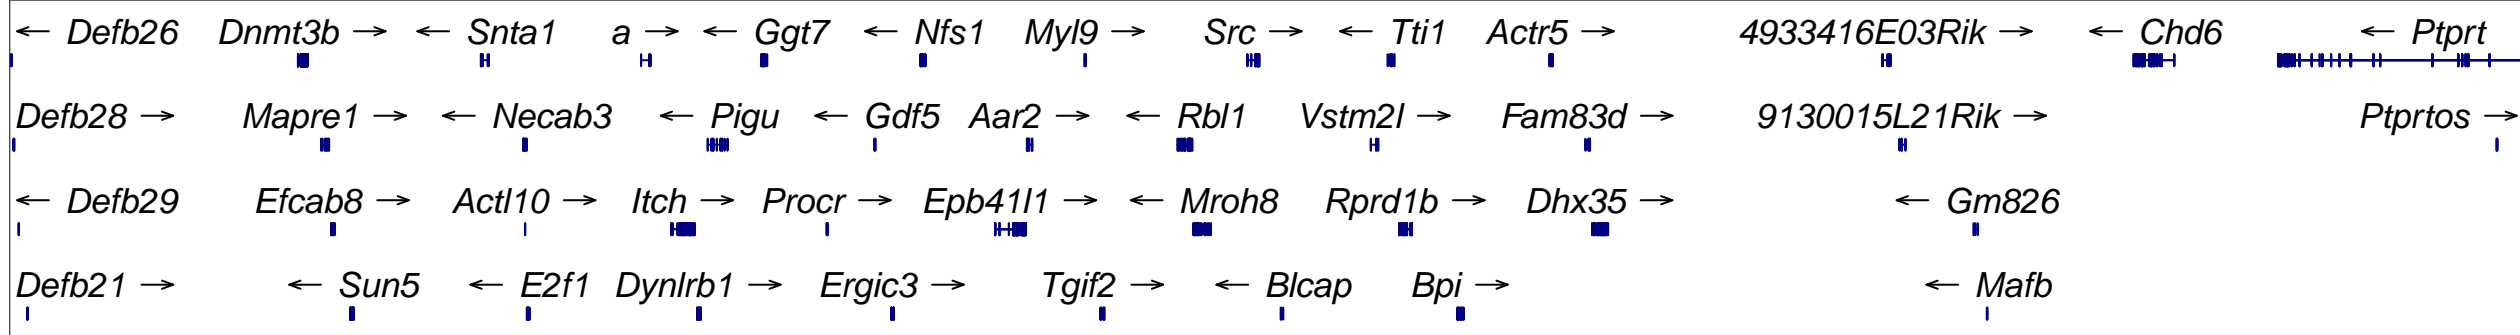

116 genes omitted

Position on chr2 (Mb)

date: Thu Oct 25 16:57:28 2018

build: F34F3943GBS

display range: chr2:152502044–162502044 [152502044–162502044]

hilite range: 0 – 0 [ 0 – 0 ]

reference SNP: chr2:157502044

number of SNPs plotted: 729

min P-value: 1.1E–5 [chr2:157502044]

max P-value: 9.69E–1 [chr2:161219896]

omitted Genes: Defb19, Defb45, Defb36

omitted Genes: Defb25, Rem1, H13

omitted Genes: Mcts2, Id1, Cox4i2

omitted Genes: Bcl2l1, Tpx2, Mir5622

omitted Genes: Mylk2, Foxs1, Dusp15

omitted Genes: Ttl9, Pdr1, Xkr7

omitted Genes: Ccm2l, Hck, Tm9sf4

omitted Genes: Tspyl3, Plagl2, Pofut1

omitted Genes: Kif3b, 2500004C02Rik, Asxl1

omitted Genes: Nol4l, Commd7, Bpifb2

omitted Genes: Bpifb6, Bpifb3, Bpifb4

omitted Genes: Bpifa6, Bpifa2, Bpifa3

omitted Genes: Bpifa1, Bpifa5, Bpifb1

omitted Genes: Bpifb5, Bpifb9a, Bpifb9b

omitted Genes: Cdk5rap1, Cbfa2t2, 1700003F12Rik

omitted Genes: Pxmp4, Zfp341, Chmp4b

omitted Genes: Raly, Eif2s2, Ahcy

omitted Genes: 2310005A03Rik, Map1lc3a, Mir695

omitted Genes: Trp53inp2, Ncoa6, Acss2

omitted Genes: Acss2os, Gss, Myh7b

omitted Genes: Mir499, Trpc4ap, Edem2

omitted Genes: Mmp24, BC029722, Eif6

omitted Genes: Fam83c, Uqcc1, Cep250

omitted Genes: 6430550D23Rik, Fer1l4, Spag4

omitted Genes: Cpne1, Rbm12, Romo1

omitted Genes: Rbm39, Phf20, Scand1

omitted Genes: Cnbd2, 2900097C17Rik, Gm14169

omitted Genes: Dlgap4, 4930405A21Rik, 5430405H02Rik

omitted Genes: 1110008F13Rik, Sla2, Ndr3

omitted Genes: Dsn1, Soga1, Tldc2

omitted Genes: Samhd1, Rpn2, Gph

omitted Genes: Mapk8, Nect, Ctnnb1

Make more plots at <http://csg.sph.umich.edu/locuszoom/>

## Fine-mapping Regions

| snp            | chr | pos (Mb) | pp          | group        | color  |
|----------------|-----|----------|-------------|--------------|--------|
| chr2:155236637 | 2   | 155.2366 | 0.003464254 | Credible Set | purple |
| chr2:155236657 | 2   | 155.2367 | 0.003412400 | Credible Set | purple |
| chr2:155236987 | 2   | 155.2370 | 0.003115889 | Credible Set | purple |
| chr2:155237968 | 2   | 155.2380 | 0.005984279 | Credible Set | purple |
| chr2:155265639 | 2   | 155.2656 | 0.004245892 | Credible Set | purple |
| chr2:155266429 | 2   | 155.2664 | 0.001304812 | Credible Set | purple |
| chr2:155266459 | 2   | 155.2665 | 0.004313901 | Credible Set | purple |
| chr2:155291037 | 2   | 155.2910 | 0.002774933 | Credible Set | purple |
| chr2:155291486 | 2   | 155.2915 | 0.005200710 | Credible Set | purple |
| chr2:155294582 | 2   | 155.2946 | 0.004064489 | Credible Set | purple |
| chr2:155294781 | 2   | 155.2948 | 0.001867995 | Credible Set | purple |
| chr2:155294817 | 2   | 155.2948 | 0.001859333 | Credible Set | purple |
| chr2:155344176 | 2   | 155.3442 | 0.004618114 | Credible Set | purple |
| chr2:155396284 | 2   | 155.3963 | 0.004588433 | Credible Set | purple |
| chr2:155427716 | 2   | 155.4277 | 0.004685690 | Credible Set | purple |
| chr2:155506374 | 2   | 155.5064 | 0.003940804 | Credible Set | purple |
| chr2:155514315 | 2   | 155.5143 | 0.004033277 | Credible Set | purple |
| chr2:155542937 | 2   | 155.5429 | 0.004413868 | Credible Set | purple |
| chr2:155543113 | 2   | 155.5431 | 0.002550139 | Credible Set | purple |
| chr2:155543163 | 2   | 155.5432 | 0.002512879 | Credible Set | purple |
| chr2:155596243 | 2   | 155.5962 | 0.003334274 | Credible Set | purple |
| chr2:155596245 | 2   | 155.5962 | 0.003363219 | Credible Set | purple |
| chr2:155596254 | 2   | 155.5963 | 0.003368160 | Credible Set | purple |
| chr2:155626668 | 2   | 155.6267 | 0.004665526 | Credible Set | purple |
| chr2:155626706 | 2   | 155.6267 | 0.004665526 | Credible Set | purple |
| chr2:155627928 | 2   | 155.6279 | 0.012087851 | Credible Set | purple |
| chr2:155630405 | 2   | 155.6304 | 0.004775484 | Credible Set | purple |
| chr2:155630630 | 2   | 155.6306 | 0.004718763 | Credible Set | purple |
| chr2:155630746 | 2   | 155.6307 | 0.004768401 | Credible Set | purple |
| chr2:155631110 | 2   | 155.6311 | 0.004873521 | Credible Set | purple |
| chr2:155632202 | 2   | 155.6322 | 0.004294823 | Credible Set | purple |
| chr2:155632358 | 2   | 155.6324 | 0.004499151 | Credible Set | purple |
| chr2:155632880 | 2   | 155.6329 | 0.004508078 | Credible Set | purple |
| chr2:155633328 | 2   | 155.6333 | 0.004549754 | Credible Set | purple |
| chr2:155640583 | 2   | 155.6406 | 0.003531773 | Credible Set | purple |
| chr2:155640694 | 2   | 155.6407 | 0.005025648 | Credible Set | purple |

## Fine-mapping Regions

| snp            | chr | pos (Mb) | pp          | group        | color  |
|----------------|-----|----------|-------------|--------------|--------|
| chr2:155640700 | 2   | 155.6407 | 0.005223632 | Credible Set | purple |
| chr2:155641730 | 2   | 155.6417 | 0.004765478 | Credible Set | purple |
| chr2:155647032 | 2   | 155.6470 | 0.004078487 | Credible Set | purple |
| chr2:155647066 | 2   | 155.6471 | 0.003208476 | Credible Set | purple |
| chr2:155659679 | 2   | 155.6597 | 0.004197479 | Credible Set | purple |
| chr2:155659722 | 2   | 155.6597 | 0.004128186 | Credible Set | purple |
| chr2:155664276 | 2   | 155.6643 | 0.004312228 | Credible Set | purple |
| chr2:155703392 | 2   | 155.7034 | 0.001787672 | Credible Set | purple |
| chr2:155703416 | 2   | 155.7034 | 0.001840882 | Credible Set | purple |
| chr2:155703421 | 2   | 155.7034 | 0.001670214 | Credible Set | purple |
| chr2:155718717 | 2   | 155.7187 | 0.004011865 | Credible Set | purple |
| chr2:155718886 | 2   | 155.7189 | 0.003607960 | Credible Set | purple |
| chr2:155718943 | 2   | 155.7189 | 0.003654915 | Credible Set | purple |
| chr2:155748773 | 2   | 155.7488 | 0.004630972 | Credible Set | purple |
| chr2:155754530 | 2   | 155.7545 | 0.004456573 | Credible Set | purple |
| chr2:155754728 | 2   | 155.7547 | 0.004360527 | Credible Set | purple |
| chr2:155765708 | 2   | 155.7657 | 0.004912680 | Credible Set | purple |
| chr2:155787135 | 2   | 155.7871 | 0.004962641 | Credible Set | purple |
| chr2:155787323 | 2   | 155.7873 | 0.004767340 | Credible Set | purple |
| chr2:155804255 | 2   | 155.8043 | 0.002458148 | Credible Set | purple |
| chr2:155804262 | 2   | 155.8043 | 0.002927899 | Credible Set | purple |
| chr2:155804269 | 2   | 155.8043 | 0.002780520 | Credible Set | purple |
| chr2:155813877 | 2   | 155.8139 | 0.005239627 | Credible Set | purple |
| chr2:155816627 | 2   | 155.8166 | 0.006726201 | Credible Set | purple |
| chr2:155818442 | 2   | 155.8184 | 0.005431683 | Credible Set | purple |
| chr2:155819513 | 2   | 155.8195 | 0.005427257 | Credible Set | purple |
| chr2:155819633 | 2   | 155.8196 | 0.003329201 | Credible Set | purple |
| chr2:155819676 | 2   | 155.8197 | 0.003297482 | Credible Set | purple |
| chr2:155827653 | 2   | 155.8277 | 0.004150075 | Credible Set | purple |
| chr2:155827705 | 2   | 155.8277 | 0.003676437 | Credible Set | purple |
| chr2:155828085 | 2   | 155.8281 | 0.005426775 | Credible Set | purple |
| chr2:155828345 | 2   | 155.8283 | 0.005391394 | Credible Set | purple |
| chr2:155828819 | 2   | 155.8288 | 0.005423197 | Credible Set | purple |
| chr2:155830487 | 2   | 155.8305 | 0.005388799 | Credible Set | purple |
| chr2:155830972 | 2   | 155.8310 | 0.004930105 | Credible Set | purple |
| chr2:155843797 | 2   | 155.8438 | 0.005460715 | Credible Set | purple |

## Fine-mapping Regions

| snp            | chr | pos (Mb) | pp          | group        | color  |
|----------------|-----|----------|-------------|--------------|--------|
| chr2:155843802 | 2   | 155.8438 | 0.005462799 | Credible Set | purple |
| chr2:155845413 | 2   | 155.8454 | 0.005436017 | Credible Set | purple |
| chr2:155859749 | 2   | 155.8597 | 0.005362268 | Credible Set | purple |
| chr2:155860022 | 2   | 155.8600 | 0.004217732 | Credible Set | purple |
| chr2:155917786 | 2   | 155.9178 | 0.003149380 | Credible Set | purple |
| chr2:155917800 | 2   | 155.9178 | 0.003128783 | Credible Set | purple |
| chr2:155934881 | 2   | 155.9349 | 0.003748017 | Credible Set | purple |
| chr2:155935242 | 2   | 155.9352 | 0.003955028 | Credible Set | purple |
| chr2:155941490 | 2   | 155.9415 | 0.004197866 | Credible Set | purple |
| chr2:155941536 | 2   | 155.9415 | 0.004197866 | Credible Set | purple |
| chr2:155962070 | 2   | 155.9621 | 0.004800666 | Credible Set | purple |
| chr2:155969145 | 2   | 155.9691 | 0.005393328 | Credible Set | purple |
| chr2:155969338 | 2   | 155.9693 | 0.004438912 | Credible Set | purple |
| chr2:155973018 | 2   | 155.9730 | 0.005882709 | Credible Set | purple |
| chr2:155973035 | 2   | 155.9730 | 0.005854227 | Credible Set | purple |
| chr2:155973697 | 2   | 155.9737 | 0.005720146 | Credible Set | purple |
| chr2:155974320 | 2   | 155.9743 | 0.005730225 | Credible Set | purple |
| chr2:155974339 | 2   | 155.9743 | 0.005621049 | Credible Set | purple |
| chr2:155974623 | 2   | 155.9746 | 0.005413386 | Credible Set | purple |
| chr2:155985744 | 2   | 155.9857 | 0.005290409 | Credible Set | purple |
| chr2:155986052 | 2   | 155.9861 | 0.005366294 | Credible Set | purple |
| chr2:155988485 | 2   | 155.9885 | 0.005089466 | Credible Set | purple |
| chr2:155989053 | 2   | 155.9891 | 0.005160591 | Credible Set | purple |
| chr2:155991302 | 2   | 155.9913 | 0.005364305 | Credible Set | purple |
| chr2:155991810 | 2   | 155.9918 | 0.005364305 | Credible Set | purple |
| chr2:155992021 | 2   | 155.9920 | 0.005347681 | Credible Set | purple |
| chr2:155997923 | 2   | 155.9979 | 0.007906597 | Credible Set | purple |
| chr2:155998479 | 2   | 155.9985 | 0.005675815 | Credible Set | purple |
| chr2:156011028 | 2   | 156.0110 | 0.005166186 | Credible Set | purple |
| chr2:156011085 | 2   | 156.0111 | 0.005485015 | Credible Set | purple |
| chr2:156011672 | 2   | 156.0117 | 0.005435624 | Credible Set | purple |
| chr2:156039455 | 2   | 156.0395 | 0.005292218 | Credible Set | purple |
| chr2:156040637 | 2   | 156.0406 | 0.005106331 | Credible Set | purple |
| chr2:156040653 | 2   | 156.0407 | 0.005122289 | Credible Set | purple |
| chr2:156041520 | 2   | 156.0415 | 0.005315708 | Credible Set | purple |
| chr2:156041911 | 2   | 156.0419 | 0.004334184 | Credible Set | purple |

## Fine-mapping Regions

| snp            | chr | pos (Mb) | pp          | group        | color  |
|----------------|-----|----------|-------------|--------------|--------|
| chr2:156041912 | 2   | 156.0419 | 0.004255881 | Credible Set | purple |
| chr2:156043677 | 2   | 156.0437 | 0.005283196 | Credible Set | purple |
| chr2:156071586 | 2   | 156.0716 | 0.005654522 | Credible Set | purple |
| chr2:156073463 | 2   | 156.0735 | 0.003673781 | Credible Set | purple |
| chr2:156077894 | 2   | 156.0779 | 0.004820393 | Credible Set | purple |
| chr2:156078317 | 2   | 156.0783 | 0.004854496 | Credible Set | purple |
| chr2:156078406 | 2   | 156.0784 | 0.005503233 | Credible Set | purple |
| chr2:156078707 | 2   | 156.0787 | 0.004747875 | Credible Set | purple |
| chr2:156078913 | 2   | 156.0789 | 0.004559174 | Credible Set | purple |
| chr2:156082428 | 2   | 156.0824 | 0.004851955 | Credible Set | purple |
| chr2:156082588 | 2   | 156.0826 | 0.004840536 | Credible Set | purple |
| chr2:156082682 | 2   | 156.0827 | 0.005260584 | Credible Set | purple |
| chr2:156111908 | 2   | 156.1119 | 0.005514199 | Credible Set | purple |
| chr2:156111910 | 2   | 156.1119 | 0.005580051 | Credible Set | purple |
| chr2:156124158 | 2   | 156.1242 | 0.005642918 | Credible Set | purple |
| chr2:156124843 | 2   | 156.1248 | 0.005542267 | Credible Set | purple |
| chr2:156133370 | 2   | 156.1334 | 0.006101269 | Credible Set | purple |
| chr2:156133395 | 2   | 156.1334 | 0.006186832 | Credible Set | purple |
| chr2:156133510 | 2   | 156.1335 | 0.004541558 | Credible Set | purple |
| chr2:156215789 | 2   | 156.2158 | 0.004853563 | Credible Set | purple |
| chr2:156259843 | 2   | 156.2598 | 0.002506363 | Credible Set | purple |
| chr2:156267477 | 2   | 156.2675 | 0.004696835 | Credible Set | purple |
| chr2:156269831 | 2   | 156.2698 | 0.004882722 | Credible Set | purple |
| chr2:156282307 | 2   | 156.2823 | 0.004557349 | Credible Set | purple |
| chr2:156302628 | 2   | 156.3026 | 0.005832612 | Credible Set | purple |
| chr2:156302714 | 2   | 156.3027 | 0.003568420 | Credible Set | purple |
| chr2:156302728 | 2   | 156.3027 | 0.003594033 | Credible Set | purple |
| chr2:156302741 | 2   | 156.3027 | 0.004741867 | Credible Set | purple |
| chr2:156303023 | 2   | 156.3030 | 0.004742166 | Credible Set | purple |
| chr2:156305013 | 2   | 156.3050 | 0.002133821 | Credible Set | purple |
| chr2:156323079 | 2   | 156.3231 | 0.004802958 | Credible Set | purple |
| chr2:156343221 | 2   | 156.3432 | 0.004808018 | Credible Set | purple |
| chr2:156343324 | 2   | 156.3433 | 0.003172128 | Credible Set | purple |
| chr2:156368682 | 2   | 156.3687 | 0.003348256 | Credible Set | purple |
| chr2:156368698 | 2   | 156.3687 | 0.004071623 | Credible Set | purple |
| chr2:156378531 | 2   | 156.3785 | 0.002896125 | Credible Set | purple |

## Fine-mapping Regions

| snp            | chr | pos (Mb) | pp          | group        | color  |
|----------------|-----|----------|-------------|--------------|--------|
| chr2:156387857 | 2   | 156.3879 | 0.002443110 | Credible Set | purple |
| chr2:156401411 | 2   | 156.4014 | 0.002112180 | Credible Set | purple |
| chr2:156407061 | 2   | 156.4071 | 0.001811764 | Credible Set | purple |
| chr2:156407080 | 2   | 156.4071 | 0.001820027 | Credible Set | purple |
| chr2:156407368 | 2   | 156.4074 | 0.002091303 | Credible Set | purple |
| chr2:156417925 | 2   | 156.4179 | 0.002025344 | Credible Set | purple |
| chr2:156419006 | 2   | 156.4190 | 0.002137265 | Credible Set | purple |
| chr2:156423785 | 2   | 156.4238 | 0.002215814 | Credible Set | purple |
| chr2:156449123 | 2   | 156.4491 | 0.001800289 | Credible Set | purple |
| chr2:156449144 | 2   | 156.4491 | 0.001797246 | Credible Set | purple |
| chr2:156453473 | 2   | 156.4535 | 0.001713582 | Credible Set | purple |
| chr2:156453552 | 2   | 156.4536 | 0.001209756 | Credible Set | purple |
| chr2:156453983 | 2   | 156.4540 | 0.001328549 | Credible Set | purple |
| chr2:156455282 | 2   | 156.4553 | 0.001244008 | Credible Set | purple |
| chr2:156455298 | 2   | 156.4553 | 0.001261566 | Credible Set | purple |
| chr2:156465034 | 2   | 156.4650 | 0.002499351 | Credible Set | purple |
| chr2:156465975 | 2   | 156.4660 | 0.003496082 | Credible Set | purple |
| chr2:156468230 | 2   | 156.4682 | 0.003540299 | Credible Set | purple |
| chr2:156474927 | 2   | 156.4749 | 0.002799408 | Credible Set | purple |
| chr2:156483143 | 2   | 156.4831 | 0.002239584 | Credible Set | purple |
| chr2:156488289 | 2   | 156.4883 | 0.002898112 | Credible Set | purple |
| chr2:156491541 | 2   | 156.4915 | 0.006458262 | Credible Set | purple |
| chr2:156491557 | 2   | 156.4916 | 0.006490324 | Credible Set | purple |
| chr2:156521595 | 2   | 156.5216 | 0.001949490 | Credible Set | purple |
| chr2:156521639 | 2   | 156.5216 | 0.001933845 | Credible Set | purple |
| chr2:156530706 | 2   | 156.5307 | 0.001957706 | Credible Set | purple |
| chr2:156532009 | 2   | 156.5320 | 0.003290282 | Credible Set | purple |
| chr2:156532011 | 2   | 156.5320 | 0.003227752 | Credible Set | purple |
| chr2:156532178 | 2   | 156.5322 | 0.002214033 | Credible Set | purple |
| chr2:156567043 | 2   | 156.5670 | 0.003454284 | Credible Set | purple |
| chr2:156567147 | 2   | 156.5671 | 0.004270274 | Credible Set | purple |
| chr2:156567188 | 2   | 156.5672 | 0.004255686 | Credible Set | purple |
| chr2:156567685 | 2   | 156.5677 | 0.003374958 | Credible Set | purple |
| chr2:156576405 | 2   | 156.5764 | 0.003697046 | Credible Set | purple |
| chr2:156576851 | 2   | 156.5769 | 0.003641216 | Credible Set | purple |
| chr2:156577083 | 2   | 156.5771 | 0.003499752 | Credible Set | purple |



## Fine-mapping Regions

| snp            | chr | pos (Mb) | pp           | group        | color  |
|----------------|-----|----------|--------------|--------------|--------|
| chr2:156585381 | 2   | 156.5854 | 0.0031373417 | Credible Set | purple |
| chr2:156587373 | 2   | 156.5874 | 0.0068286765 | Credible Set | purple |
| chr2:156587398 | 2   | 156.5874 | 0.0066638586 | Credible Set | purple |
| chr2:156592202 | 2   | 156.5922 | 0.0071619124 | Credible Set | purple |
| chr2:156595258 | 2   | 156.5953 | 0.0050107373 | Credible Set | purple |
| chr2:156632710 | 2   | 156.6327 | 0.0035710491 | Credible Set | purple |
| chr2:156632738 | 2   | 156.6327 | 0.0035775720 | Credible Set | purple |
| chr2:156632859 | 2   | 156.6329 | 0.0036849568 | Credible Set | purple |
| chr2:156641079 | 2   | 156.6411 | 0.0037715582 | Credible Set | purple |
| chr2:156641293 | 2   | 156.6413 | 0.0035848273 | Credible Set | purple |
| chr2:156649922 | 2   | 156.6499 | 0.0025984413 | Credible Set | purple |
| chr2:156649929 | 2   | 156.6499 | 0.0026030714 | Credible Set | purple |
| chr2:156650908 | 2   | 156.6509 | 0.0026748524 | Credible Set | purple |
| chr2:156668062 | 2   | 156.6681 | 0.0020853404 | Credible Set | purple |
| chr2:156668618 | 2   | 156.6686 | 0.0022471289 | Credible Set | purple |
| chr2:156704128 | 2   | 156.7041 | 0.0026491077 | Credible Set | purple |
| chr2:156704178 | 2   | 156.7042 | 0.0026521994 | Credible Set | purple |
| chr2:156711128 | 2   | 156.7111 | 0.0029699087 | Credible Set | purple |
| chr2:156743106 | 2   | 156.7431 | 0.0010177636 | Credible Set | purple |
| chr2:156743119 | 2   | 156.7431 | 0.0010261599 | Credible Set | purple |
| chr2:156764741 | 2   | 156.7647 | 0.0015817923 | Credible Set | purple |
| chr2:156764772 | 2   | 156.7648 | 0.0015282847 | Credible Set | purple |
| chr2:156770397 | 2   | 156.7704 | 0.0022390633 | Credible Set | purple |
| chr2:156795214 | 2   | 156.7952 | 0.0021430373 | Credible Set | purple |
| chr2:156795236 | 2   | 156.7952 | 0.0022159256 | Credible Set | purple |
| chr2:156803978 | 2   | 156.8040 | 0.0019834834 | Credible Set | purple |
| chr2:156812752 | 2   | 156.8128 | 0.0032191553 | Credible Set | purple |
| chr2:156825839 | 2   | 156.8258 | 0.0011432370 | Credible Set | purple |
| chr2:156825844 | 2   | 156.8258 | 0.0011455427 | Credible Set | purple |
| chr2:156825876 | 2   | 156.8259 | 0.0011455427 | Credible Set | purple |
| chr2:156845905 | 2   | 156.8459 | 0.0013595092 | Credible Set | purple |
| chr2:156861931 | 2   | 156.8619 | 0.0012955542 | Credible Set | purple |
| chr2:156862185 | 2   | 156.8622 | 0.0007890450 | Credible Set | purple |
| chr2:156862198 | 2   | 156.8622 | 0.0007672412 | Credible Set | purple |
| chr2:156882805 | 2   | 156.8828 | 0.0011521620 | Credible Set | purple |
| chr2:156882992 | 2   | 156.8830 | 0.0008577711 | Credible Set | purple |

## Fine-mapping Regions

| snp            | chr | pos (Mb) | pp           | group        | color  |
|----------------|-----|----------|--------------|--------------|--------|
| chr2:156883081 | 2   | 156.8831 | 0.0012955563 | Credible Set | purple |
| chr2:156883502 | 2   | 156.8835 | 0.0013118728 | Credible Set | purple |
| chr2:156886515 | 2   | 156.8865 | 0.0012406945 | Credible Set | purple |
| chr2:156886654 | 2   | 156.8867 | 0.0012963735 | Credible Set | purple |
| chr2:156887147 | 2   | 156.8871 | 0.0015148143 | Credible Set | purple |
| chr2:156887169 | 2   | 156.8872 | 0.0015205605 | Credible Set | purple |
| chr2:156948001 | 2   | 156.9480 | 0.0021425069 | Credible Set | purple |
| chr2:156959200 | 2   | 156.9592 | 0.0038667295 | Credible Set | purple |
| chr2:156959224 | 2   | 156.9592 | 0.0039744275 | Credible Set | purple |
| chr2:156959230 | 2   | 156.9592 | 0.0039548773 | Credible Set | purple |
| chr2:156959240 | 2   | 156.9592 | 0.0037438688 | Credible Set | purple |
| chr2:156973206 | 2   | 156.9732 | 0.0017415272 | Credible Set | purple |
| chr2:156973473 | 2   | 156.9735 | 0.0015382514 | Credible Set | purple |
| chr2:157010815 | 2   | 157.0108 | 0.0014694757 | Credible Set | purple |
| chr2:157016739 | 2   | 157.0167 | 0.0014118117 | Credible Set | purple |
| chr2:157017028 | 2   | 157.0170 | 0.0015052076 | Credible Set | purple |
| chr2:157017101 | 2   | 157.0171 | 0.0014015806 | Credible Set | purple |
| chr2:157017479 | 2   | 157.0175 | 0.0016460234 | Credible Set | purple |
| chr2:157017498 | 2   | 157.0175 | 0.0017770082 | Credible Set | purple |
| chr2:157027114 | 2   | 157.0271 | 0.0016627983 | Credible Set | purple |
| chr2:157027115 | 2   | 157.0271 | 0.0016199752 | Credible Set | purple |
| chr2:157027346 | 2   | 157.0273 | 0.0015629572 | Credible Set | purple |
| chr2:157027552 | 2   | 157.0276 | 0.0024364362 | Credible Set | purple |
| chr2:157027594 | 2   | 157.0276 | 0.0014353026 | Credible Set | purple |
| chr2:157033406 | 2   | 157.0334 | 0.0009439426 | Credible Set | purple |
| chr2:157033457 | 2   | 157.0335 | 0.0009444899 | Credible Set | purple |
| chr2:157033569 | 2   | 157.0336 | 0.0010841445 | Credible Set | purple |
| chr2:157033589 | 2   | 157.0336 | 0.0010835272 | Credible Set | purple |
| chr2:157037970 | 2   | 157.0380 | 0.0014006832 | Credible Set | purple |
| chr2:157040364 | 2   | 157.0404 | 0.0011133013 | Credible Set | purple |
| chr2:157040379 | 2   | 157.0404 | 0.0008903294 | Credible Set | purple |
| chr2:157040564 | 2   | 157.0406 | 0.0009705227 | Credible Set | purple |
| chr2:157059250 | 2   | 157.0592 | 0.0010486637 | Credible Set | purple |
| chr2:157059408 | 2   | 157.0594 | 0.0010589980 | Credible Set | purple |
| chr2:157059810 | 2   | 157.0598 | 0.0010928199 | Credible Set | purple |
| chr2:157059893 | 2   | 157.0599 | 0.0009972369 | Credible Set | purple |

## Fine-mapping Regions

| snp            | chr | pos (Mb) | pp           | group        | color  |
|----------------|-----|----------|--------------|--------------|--------|
| chr2:157063511 | 2   | 157.0635 | 0.0011838957 | Credible Set | purple |
| chr2:157065641 | 2   | 157.0656 | 0.0010353076 | Credible Set | purple |
| chr2:157075626 | 2   | 157.0756 | 0.0011330257 | Credible Set | purple |
| chr2:157075934 | 2   | 157.0759 | 0.0010599377 | Credible Set | purple |
| chr2:157138913 | 2   | 157.1389 | 0.0012723001 | Credible Set | purple |
| chr2:157144291 | 2   | 157.1443 | 0.0013028317 | Credible Set | purple |
| chr2:157145837 | 2   | 157.1458 | 0.0013032310 | Credible Set | purple |
| chr2:157149696 | 2   | 157.1497 | 0.0012348486 | Credible Set | purple |
| chr2:157170168 | 2   | 157.1702 | 0.0012208824 | Credible Set | purple |
| chr2:157234145 | 2   | 157.2341 | 0.0012425076 | Credible Set | purple |
| chr2:157234194 | 2   | 157.2342 | 0.0010569087 | Credible Set | purple |
| chr2:157234584 | 2   | 157.2346 | 0.0011310373 | Credible Set | purple |
| chr2:157234605 | 2   | 157.2346 | 0.0011091951 | Credible Set | purple |
| chr2:157244801 | 2   | 157.2448 | 0.0010773172 | Credible Set | purple |
| chr2:157245205 | 2   | 157.2452 | 0.0010994381 | Credible Set | purple |
| chr2:157245270 | 2   | 157.2453 | 0.0010007732 | Credible Set | purple |
| chr2:157271470 | 2   | 157.2715 | 0.0011382333 | Credible Set | purple |
| chr2:157323455 | 2   | 157.3235 | 0.0007555954 | Credible Set | purple |
| chr2:157323490 | 2   | 157.3235 | 0.0008157944 | Credible Set | purple |
| chr2:157323542 | 2   | 157.3235 | 0.0007564508 | Credible Set | purple |
| chr2:157350851 | 2   | 157.3509 | 0.0008974539 | Credible Set | purple |
| chr2:157356604 | 2   | 157.3566 | 0.0014060960 | Credible Set | purple |
| chr2:157383750 | 2   | 157.3837 | 0.0014465647 | Credible Set | purple |
| chr2:157384030 | 2   | 157.3840 | 0.0023475423 | Credible Set | purple |
| chr2:157384046 | 2   | 157.3840 | 0.0023756954 | Credible Set | purple |
| chr2:157393248 | 2   | 157.3932 | 0.0009728794 | Credible Set | purple |
| chr2:157393326 | 2   | 157.3933 | 0.0008826988 | Credible Set | purple |
| chr2:157393328 | 2   | 157.3933 | 0.0008958535 | Credible Set | purple |
| chr2:157396118 | 2   | 157.3961 | 0.0018808429 | Credible Set | purple |
| chr2:157396325 | 2   | 157.3963 | 0.0011545388 | Credible Set | purple |
| chr2:157396340 | 2   | 157.3963 | 0.0011711049 | Credible Set | purple |
| chr2:157396357 | 2   | 157.3964 | 0.0011652736 | Credible Set | purple |
| chr2:157396513 | 2   | 157.3965 | 0.0020350770 | Credible Set | purple |
| chr2:157401494 | 2   | 157.4015 | 0.0022594395 | Credible Set | purple |
| chr2:157425583 | 2   | 157.4256 | 0.0020445300 | Credible Set | purple |
| chr2:157434588 | 2   | 157.4346 | 0.0018976095 | Credible Set | purple |

Fine-mapping Regions

| snp            | chr | pos (Mb) | pp          | group        | color  |
|----------------|-----|----------|-------------|--------------|--------|
| chr2:157439371 | 2   | 157.4394 | 0.001868134 | Credible Set | purple |
| chr2:157455578 | 2   | 157.4556 | 0.001567994 | Credible Set | purple |
| chr2:157458440 | 2   | 157.4584 | 0.001857250 | Credible Set | purple |
| chr2:157464790 | 2   | 157.4648 | 0.002049487 | Credible Set | purple |
| chr2:157464811 | 2   | 157.4648 | 0.002055422 | Credible Set | purple |
| chr2:157464835 | 2   | 157.4648 | 0.002054751 | Credible Set | purple |
| chr2:157464946 | 2   | 157.4649 | 0.002013449 | Credible Set | purple |
| chr2:157465338 | 2   | 157.4653 | 0.002013553 | Credible Set | purple |
| chr2:157502041 | 2   | 157.5020 | 0.001182759 | Credible Set | purple |
| chr2:157502044 | 2   | 157.5020 | 0.017255691 | Credible Set | purple |
| chr2:157549374 | 2   | 157.5494 | 0.001368992 | Credible Set | purple |
| chr2:157630394 | 2   | 157.6304 | 0.001296992 | Credible Set | purple |
| chr2:157630611 | 2   | 157.6306 | 0.001358558 | Credible Set | purple |
| chr2:157635749 | 2   | 157.6357 | 0.001266836 | Credible Set | purple |

# F34, F39–43 GBS, body weight

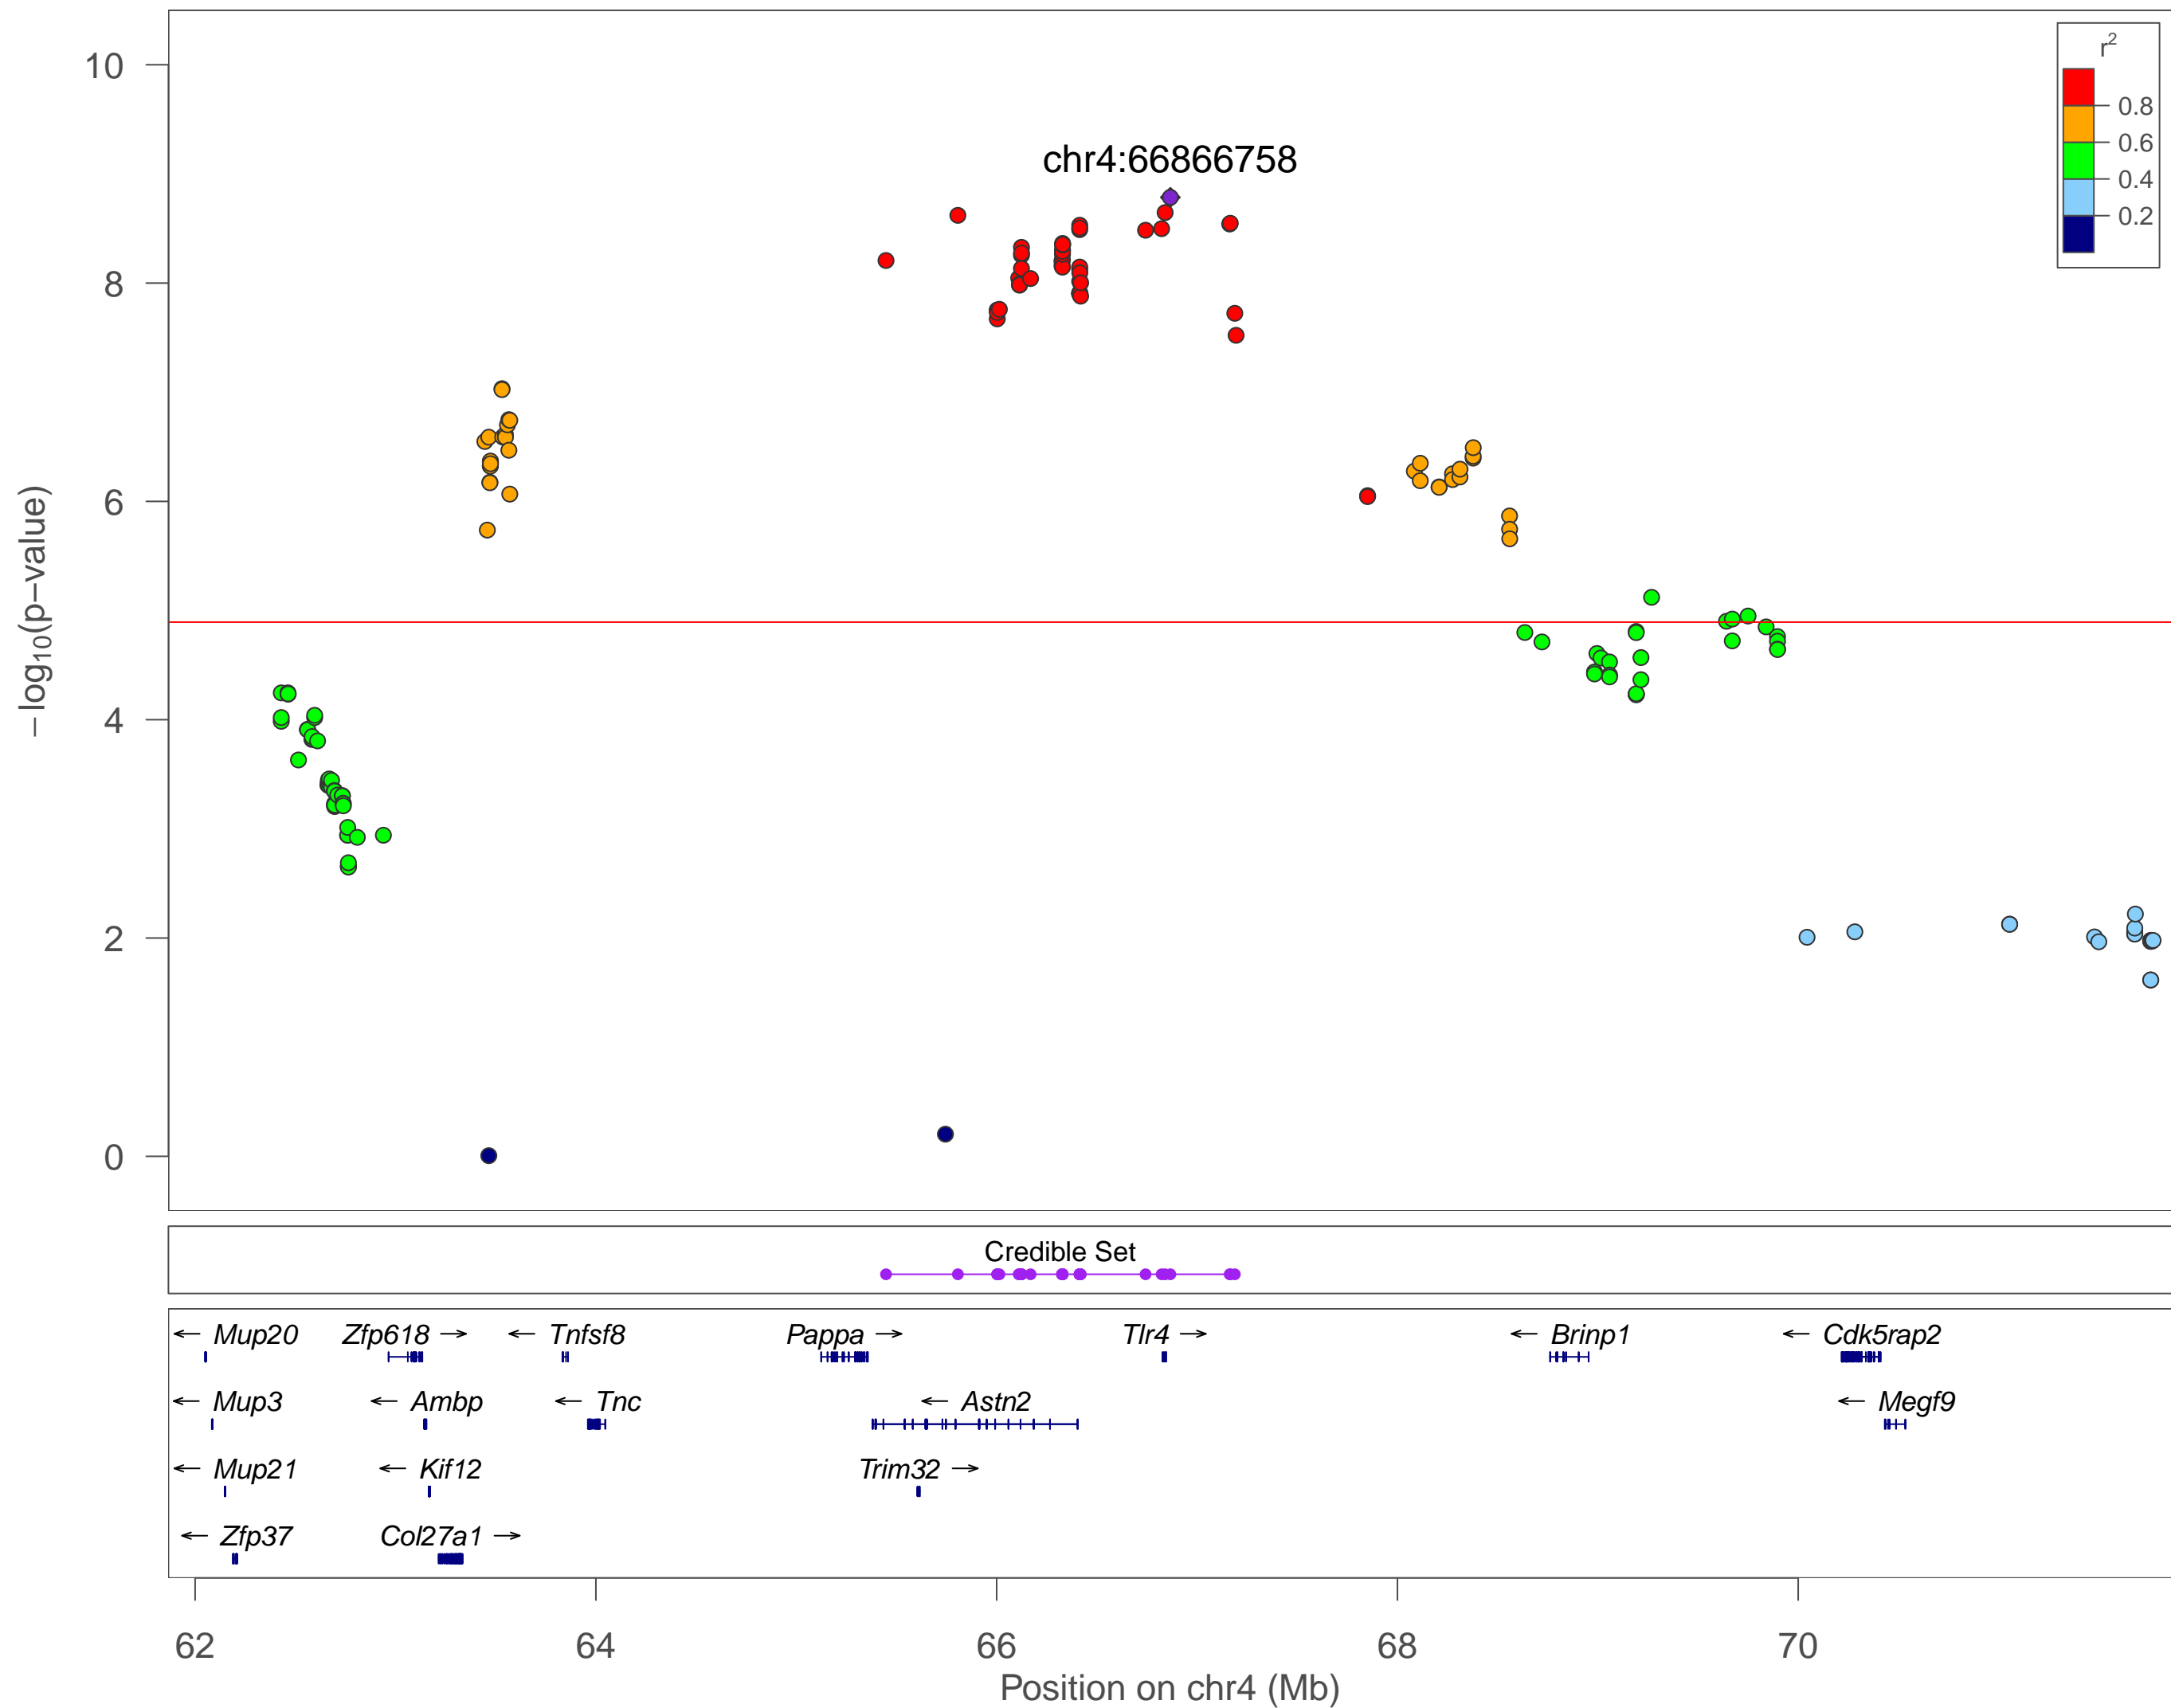

date: Thu Oct 25 16:57:41 2018

build: F34F3943GBS

display range: chr4:61866758–71866758 [61866758–71866758]

hilite range: 0 – 0 [ 0 – 0 ]

reference SNP: chr4:66866758

number of SNPs plotted: 176

min P-value: 1.64E–9 [chr4:66866758]

max P-value: 9.86E–1 [chr4:63465549]

omitted Genes: Slc31a2, Fkbp15, Slc31a1

omitted Genes: Cdc26, Prpf4, Rnf183

omitted Genes: Wdr31, Bspry, Hdhd3

omitted Genes: Alad, Pole3, 4933430I17Rik

omitted Genes: Rgs3, Mir455, Orm1

omitted Genes: Orm3, Orm2, Akna

omitted Genes: Whrn, Atp6v1g1, 6330416G13Rik

omitted Genes: Gm11213, 1700018C11Rik, Tnfsf15

## Fine-mapping Regions

| snp           | chr | pos (Mb) | pp          | group        | color  |
|---------------|-----|----------|-------------|--------------|--------|
| chr4:65447841 | 4   | 65.44784 | 0.019506224 | Credible Set | purple |
| chr4:65806420 | 4   | 65.80642 | 0.049316694 | Credible Set | purple |
| chr4:66002530 | 4   | 66.00253 | 0.007070884 | Credible Set | purple |
| chr4:66003029 | 4   | 66.00303 | 0.005898172 | Credible Set | purple |
| chr4:66003164 | 4   | 66.00316 | 0.006730268 | Credible Set | purple |
| chr4:66013512 | 4   | 66.01351 | 0.007172830 | Credible Set | purple |
| chr4:66110072 | 4   | 66.11007 | 0.013600870 | Credible Set | purple |
| chr4:66114163 | 4   | 66.11416 | 0.012017017 | Credible Set | purple |
| chr4:66114164 | 4   | 66.11416 | 0.011762290 | Credible Set | purple |
| chr4:66114176 | 4   | 66.11418 | 0.011842761 | Credible Set | purple |
| chr4:66123765 | 4   | 66.12377 | 0.021752254 | Credible Set | purple |
| chr4:66123768 | 4   | 66.12377 | 0.016580614 | Credible Set | purple |
| chr4:66123832 | 4   | 66.12383 | 0.025581610 | Credible Set | purple |
| chr4:66124242 | 4   | 66.12424 | 0.022728535 | Credible Set | purple |
| chr4:66169378 | 4   | 66.16938 | 0.013474615 | Credible Set | purple |
| chr4:66325857 | 4   | 66.32586 | 0.019241218 | Credible Set | purple |
| chr4:66325987 | 4   | 66.32599 | 0.017557542 | Credible Set | purple |
| chr4:66328189 | 4   | 66.32819 | 0.019746700 | Credible Set | purple |
| chr4:66328195 | 4   | 66.32819 | 0.017021073 | Credible Set | purple |
| chr4:66328436 | 4   | 66.32844 | 0.022182463 | Credible Set | purple |
| chr4:66328528 | 4   | 66.32853 | 0.024302960 | Credible Set | purple |
| chr4:66328560 | 4   | 66.32856 | 0.023547948 | Credible Set | purple |
| chr4:66329044 | 4   | 66.32904 | 0.027714988 | Credible Set | purple |
| chr4:66329065 | 4   | 66.32906 | 0.026859513 | Credible Set | purple |
| chr4:66329095 | 4   | 66.32909 | 0.027130315 | Credible Set | purple |
| chr4:66414332 | 4   | 66.41433 | 0.009959476 | Credible Set | purple |
| chr4:66414345 | 4   | 66.41434 | 0.010084430 | Credible Set | purple |
| chr4:66414373 | 4   | 66.41437 | 0.009806950 | Credible Set | purple |
| chr4:66414374 | 4   | 66.41437 | 0.009901791 | Credible Set | purple |
| chr4:66414384 | 4   | 66.41438 | 0.012715423 | Credible Set | purple |
| chr4:66414387 | 4   | 66.41439 | 0.016308798 | Credible Set | purple |
| chr4:66414451 | 4   | 66.41445 | 0.017072865 | Credible Set | purple |
| chr4:66414476 | 4   | 66.41448 | 0.036777925 | Credible Set | purple |
| chr4:66414508 | 4   | 66.41451 | 0.040273642 | Credible Set | purple |
| chr4:66414513 | 4   | 66.41451 | 0.038034578 | Credible Set | purple |
| chr4:66414963 | 4   | 66.41496 | 0.015171452 | Credible Set | purple |

Fine-mapping Regions

| snp           | chr | pos (Mb) | pp          | group        | color  |
|---------------|-----|----------|-------------|--------------|--------|
| chr4:66419064 | 4   | 66.41906 | 0.009391583 | Credible Set | purple |
| chr4:66419126 | 4   | 66.41913 | 0.012358438 | Credible Set | purple |
| chr4:66743103 | 4   | 66.74310 | 0.036342646 | Credible Set | purple |
| chr4:66823255 | 4   | 66.82326 | 0.037502254 | Credible Set | purple |
| chr4:66840696 | 4   | 66.84070 | 0.052214273 | Credible Set | purple |
| chr4:66866758 | 4   | 66.86676 | 0.071397622 | Credible Set | purple |
| chr4:67163007 | 4   | 67.16301 | 0.041268735 | Credible Set | purple |
| chr4:67165680 | 4   | 67.16568 | 0.041934791 | Credible Set | purple |
| chr4:67188375 | 4   | 67.18837 | 0.006611697 | Credible Set | purple |



# F34, F39–43 GBS, body weight

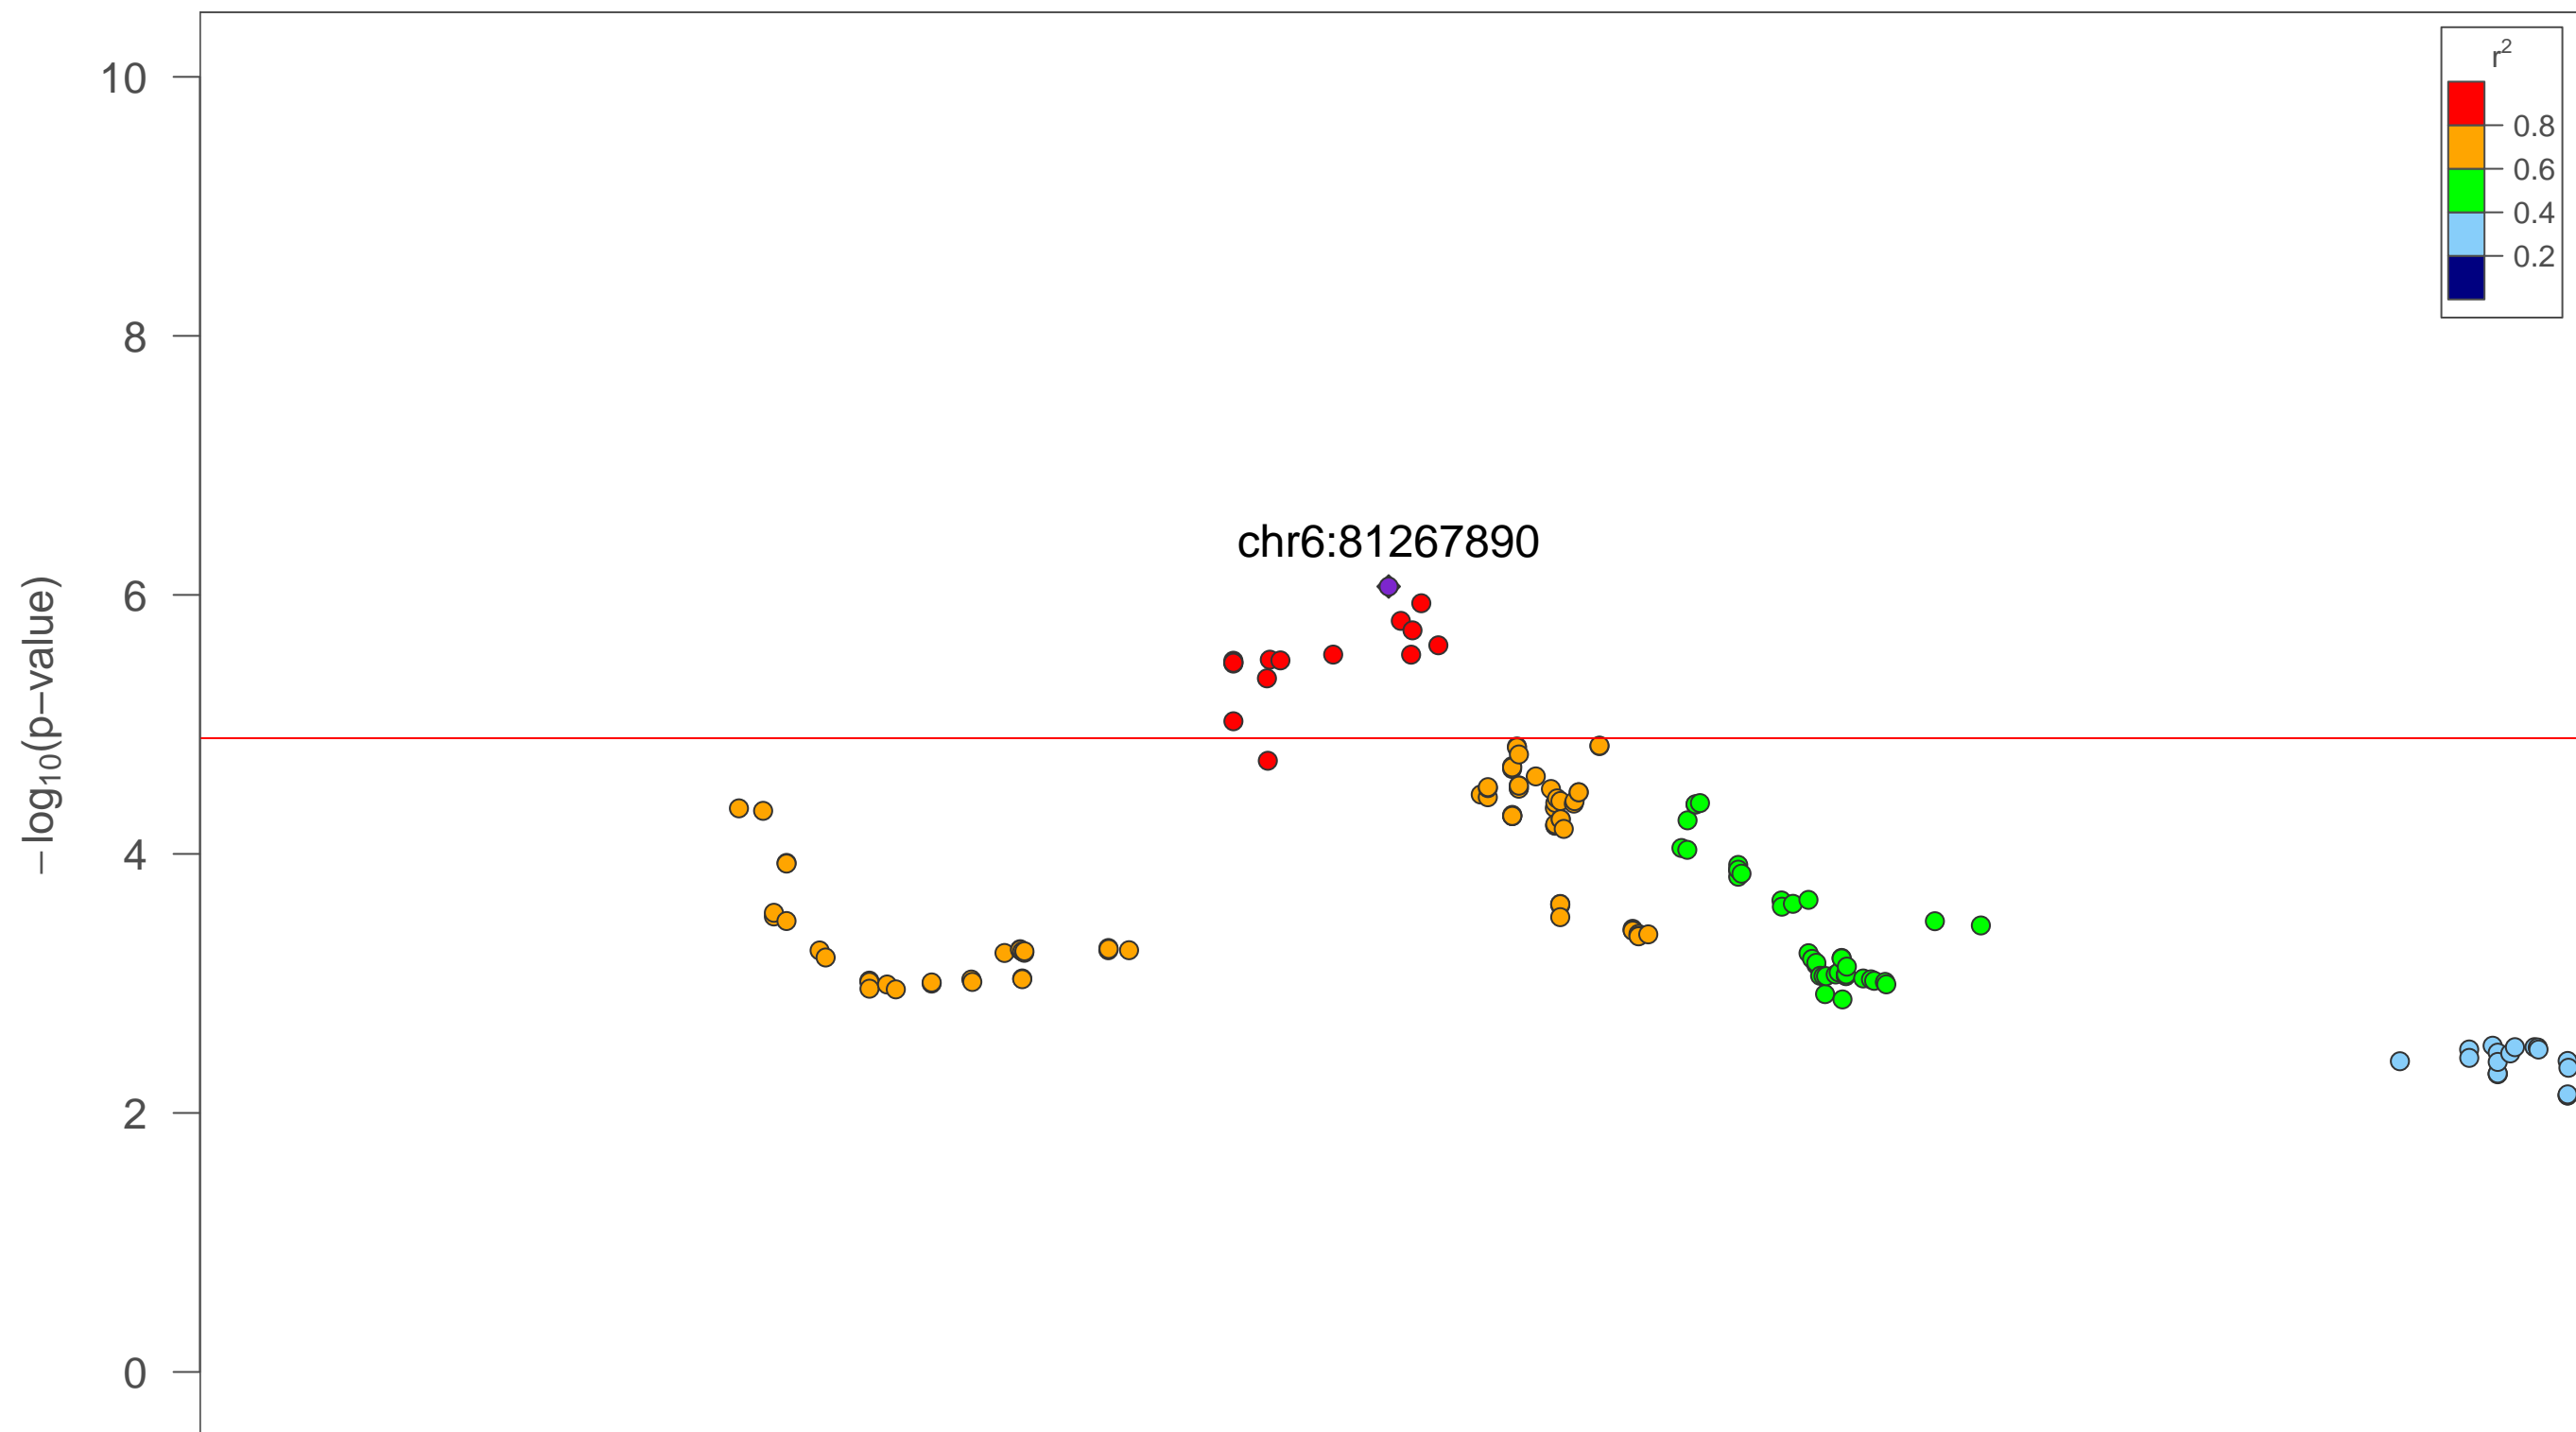

Credible Set

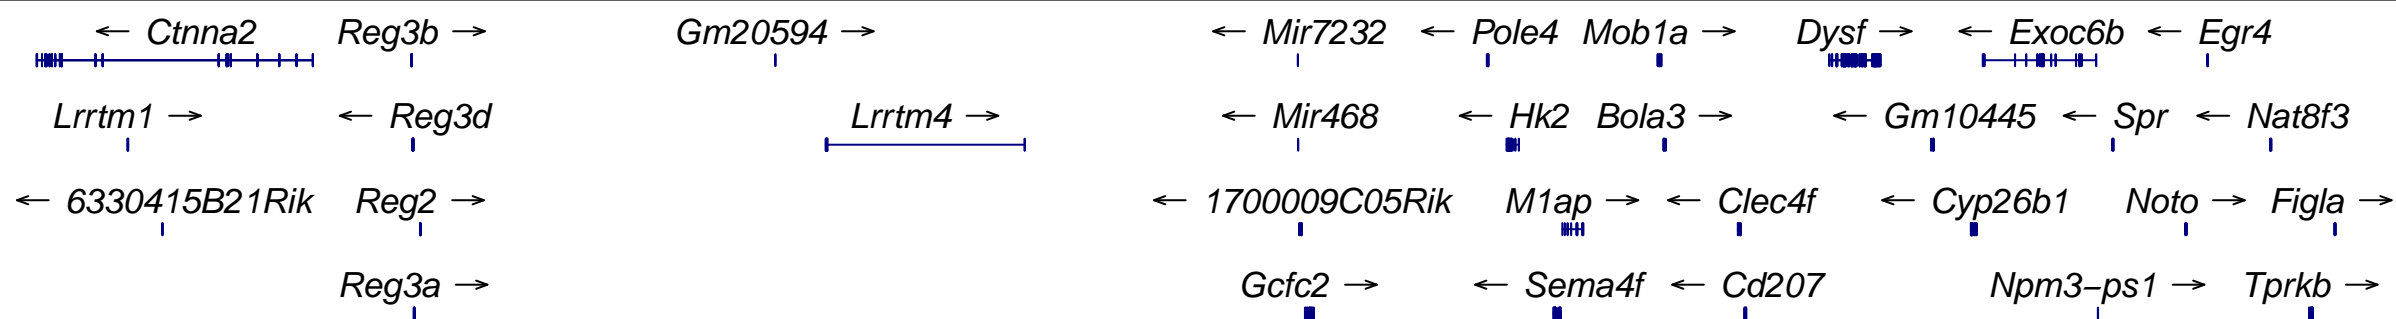

67 genes  
omitted

78

80

82

84

86

Position on chr6 (Mb)

date: Thu Oct 25 16:57:51 2018  
build: F34F3943GBS  
display range: chr6:76267890–86267890 [76267890–86267890]  
hilite range: 0 – 0 [ 0 – 0 ]  
reference SNP: chr6:81267890  
number of SNPs plotted: 154  
min P-value: 8.61E–7 [chr6:81267890]  
max P-value: 7.33E–3 [chr6:86226371]  
omitted Genes: Reg1, Reg3g, Gm20362  
omitted Genes: Mrpl19, Eva1a, Tacr1  
omitted Genes: 2310069B03Rik, Dok1, Loxl3  
omitted Genes: Mir7040, Htra2, Aup1  
omitted Genes: Dqx1, Tlx2, Pcgf1  
omitted Genes: Lbx2, Mir3470a, Ccdc142  
omitted Genes: Mrpl53, Mogs, Wbp1  
omitted Genes: Ino80b, Rtkn, Wdr54  
omitted Genes: 1700003E16Rik, Dctn1, Slc4a5  
omitted Genes: Mthfd2, Tet3, Mir6374  
omitted Genes: B230319C09Rik, Dguok, Actg2  
omitted Genes: Stambp, Gm21284, Vax2os  
omitted Genes: Vax2, Atp6v1b1, 1700124L16Rik  
omitted Genes: Ankrd53, Tex261, Gm7443  
omitted Genes: Nagk, Paip2b, Zfp638  
omitted Genes: Gm5878, Emx1, Sfxn5  
omitted Genes: Rab11fip5, Mir705, Smyd5  
omitted Genes: Pradc1, Cct7, Fbxo41  
omitted Genes: Alms1, Nat8f7, Mir6375  
omitted Genes: Alms1-ps2, Nat8f6, Nat8f5  
omitted Genes: Nat8, Nat8f2, Nat8f4  
omitted Genes: Nat8f1, Dusp11, Add2  
omitted Genes: Tgfa

Fine-mapping Regions

| snp           | chr | pos (Mb) | pp         | group        | color  |
|---------------|-----|----------|------------|--------------|--------|
| chr6:80614710 | 6   | 80.61471 | 0.04857390 | Credible Set | purple |
| chr6:80614725 | 6   | 80.61473 | 0.04623828 | Credible Set | purple |
| chr6:80614740 | 6   | 80.61474 | 0.04722318 | Credible Set | purple |
| chr6:80614750 | 6   | 80.61475 | 0.04694999 | Credible Set | purple |
| chr6:80614907 | 6   | 80.61491 | 0.01733174 | Credible Set | purple |
| chr6:80755939 | 6   | 80.75594 | 0.03596034 | Credible Set | purple |
| chr6:80767933 | 6   | 80.76793 | 0.04944593 | Credible Set | purple |
| chr6:80812582 | 6   | 80.81258 | 0.04883514 | Credible Set | purple |
| chr6:81034488 | 6   | 81.03449 | 0.05391742 | Credible Set | purple |
| chr6:81267890 | 6   | 81.26789 | 0.17255878 | Credible Set | purple |
| chr6:81318989 | 6   | 81.31899 | 0.09591536 | Credible Set | purple |
| chr6:81362217 | 6   | 81.36222 | 0.05384616 | Credible Set | purple |
| chr6:81368112 | 6   | 81.36811 | 0.08156347 | Credible Set | purple |
| chr6:81405109 | 6   | 81.40511 | 0.12958790 | Credible Set | purple |
| chr6:81476902 | 6   | 81.47690 | 0.06318092 | Credible Set | purple |

# F34, F39–43 GBS, body weight

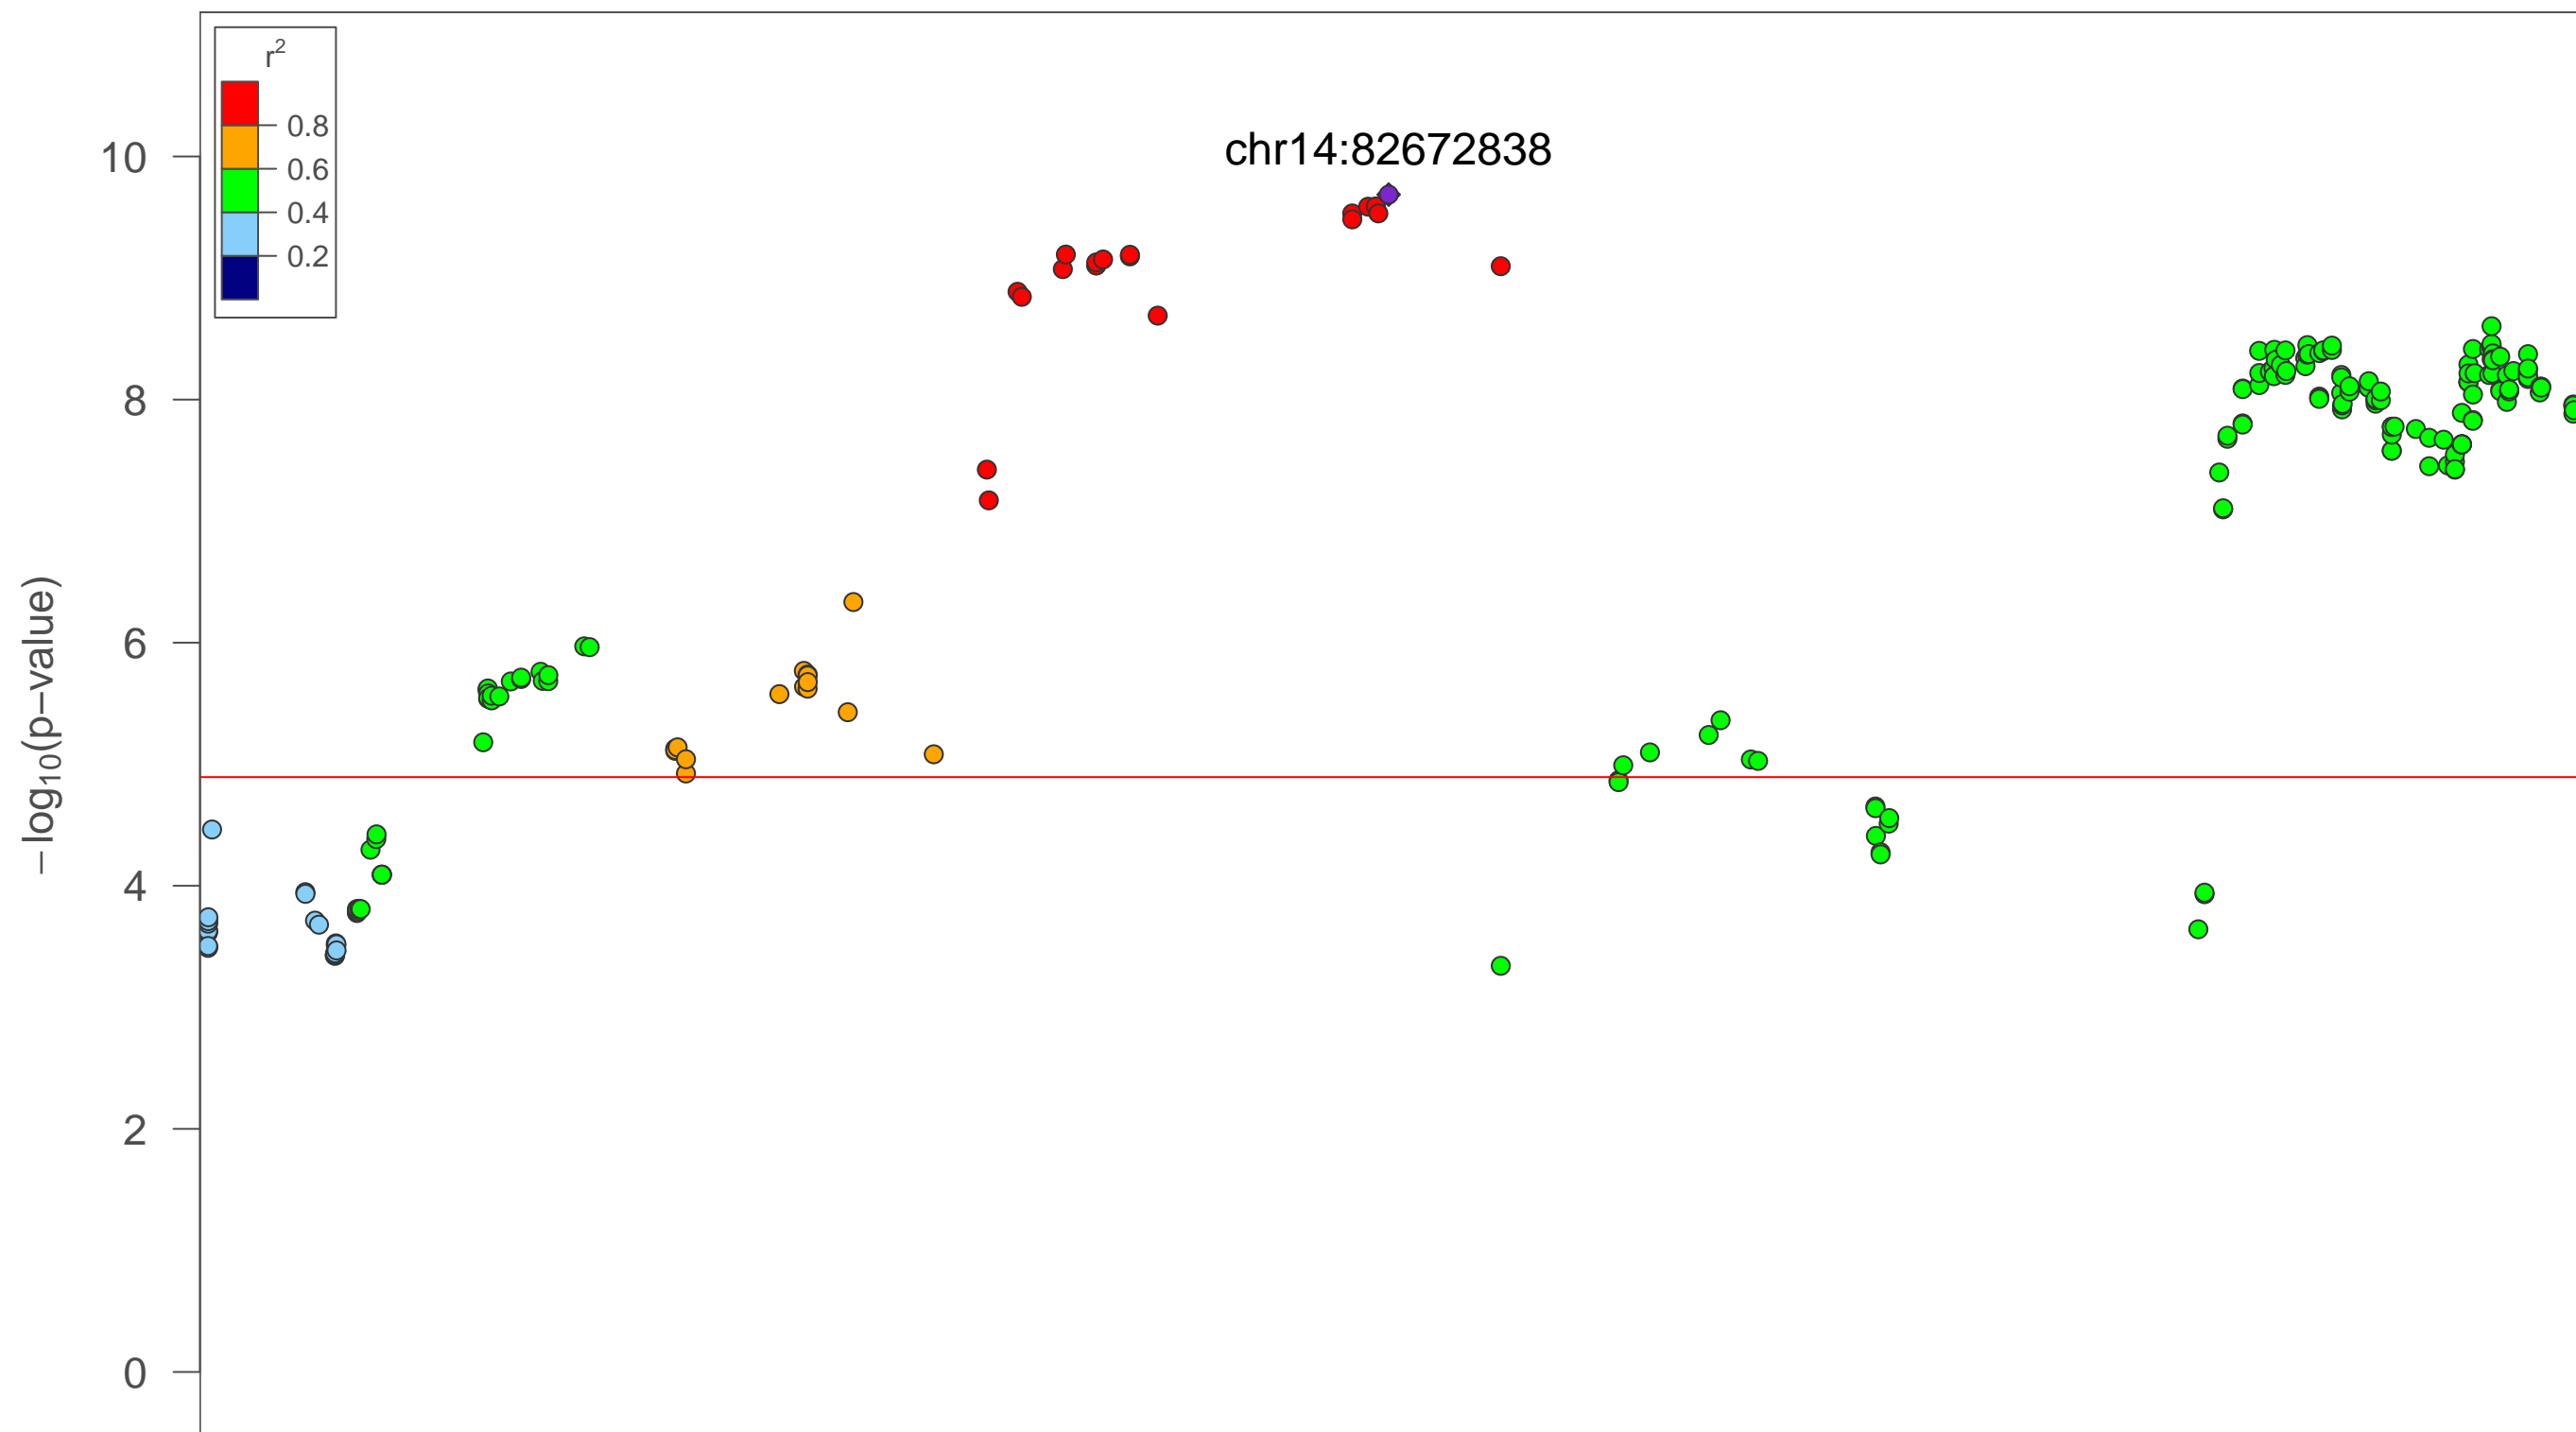

Credible Set

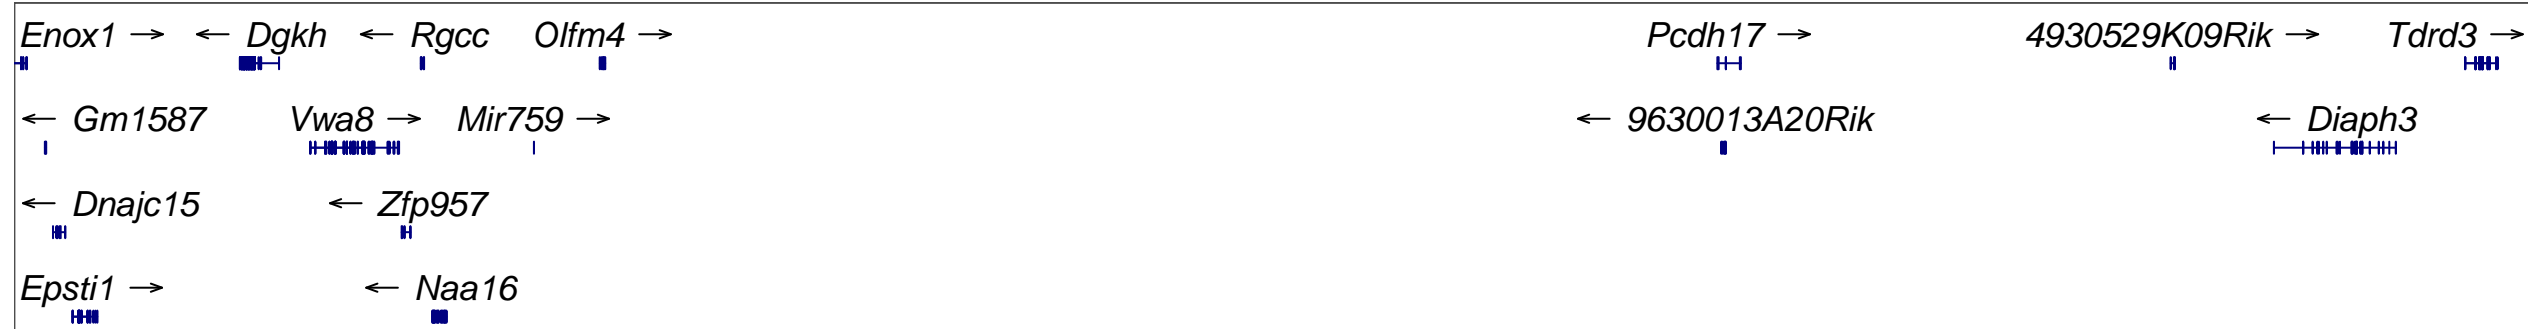

14 genes  
omitted

date: Thu Oct 25 16:57:18 2018

build: F34F3943GBS

display range: chr14:77672838–87672838 [77672838–87672838]

hilite range: 0 – 0 [ 0 – 0 ]

reference SNP: chr14:82672838

number of SNPs plotted: 233

min P-value: 2.06E–10 [chr14:82672838]

max P-value: 4.55E–4 [chr14:83144370]

omitted Genes: Fam216b, Mir1971, Tnfsf11

omitted Genes: Akap11, Mtrf1, Kbtbd7

omitted Genes: Kbtbd6, Wbp4, Elf1

omitted Genes: Sugt1, Lect1, 4930452G13Rik

omitted Genes: Pcdh8, Gm10845

Fine-mapping Regions

| snp            | chr | pos (Mb) | pp         | group        | color  |
|----------------|-----|----------|------------|--------------|--------|
| chr14:81112053 | 14  | 81.11205 | 0.02153824 | Credible Set | purple |
| chr14:81129931 | 14  | 81.12993 | 0.01961019 | Credible Set | purple |
| chr14:81302522 | 14  | 81.30252 | 0.03271591 | Credible Set | purple |
| chr14:81315250 | 14  | 81.31525 | 0.04283704 | Credible Set | purple |
| chr14:81443053 | 14  | 81.44305 | 0.03518459 | Credible Set | purple |
| chr14:81443088 | 14  | 81.44309 | 0.03495130 | Credible Set | purple |
| chr14:81443103 | 14  | 81.44310 | 0.03705697 | Credible Set | purple |
| chr14:81471656 | 14  | 81.47166 | 0.03910768 | Credible Set | purple |
| chr14:81584557 | 14  | 81.58456 | 0.04138683 | Credible Set | purple |
| chr14:81584584 | 14  | 81.58458 | 0.04266022 | Credible Set | purple |
| chr14:81701500 | 14  | 81.70150 | 0.01386607 | Credible Set | purple |
| chr14:82519671 | 14  | 82.51967 | 0.09157956 | Credible Set | purple |
| chr14:82519834 | 14  | 82.51983 | 0.08209422 | Credible Set | purple |
| chr14:82586326 | 14  | 82.58633 | 0.10379728 | Credible Set | purple |
| chr14:82618916 | 14  | 82.61892 | 0.10439366 | Credible Set | purple |
| chr14:82629334 | 14  | 82.62933 | 0.09166977 | Credible Set | purple |
| chr14:82672838 | 14  | 82.67284 | 0.12975387 | Credible Set | purple |
| chr14:83144282 | 14  | 83.14428 | 0.03452068 | Credible Set | purple |

F34, F39–43 GBS, coat color, albino

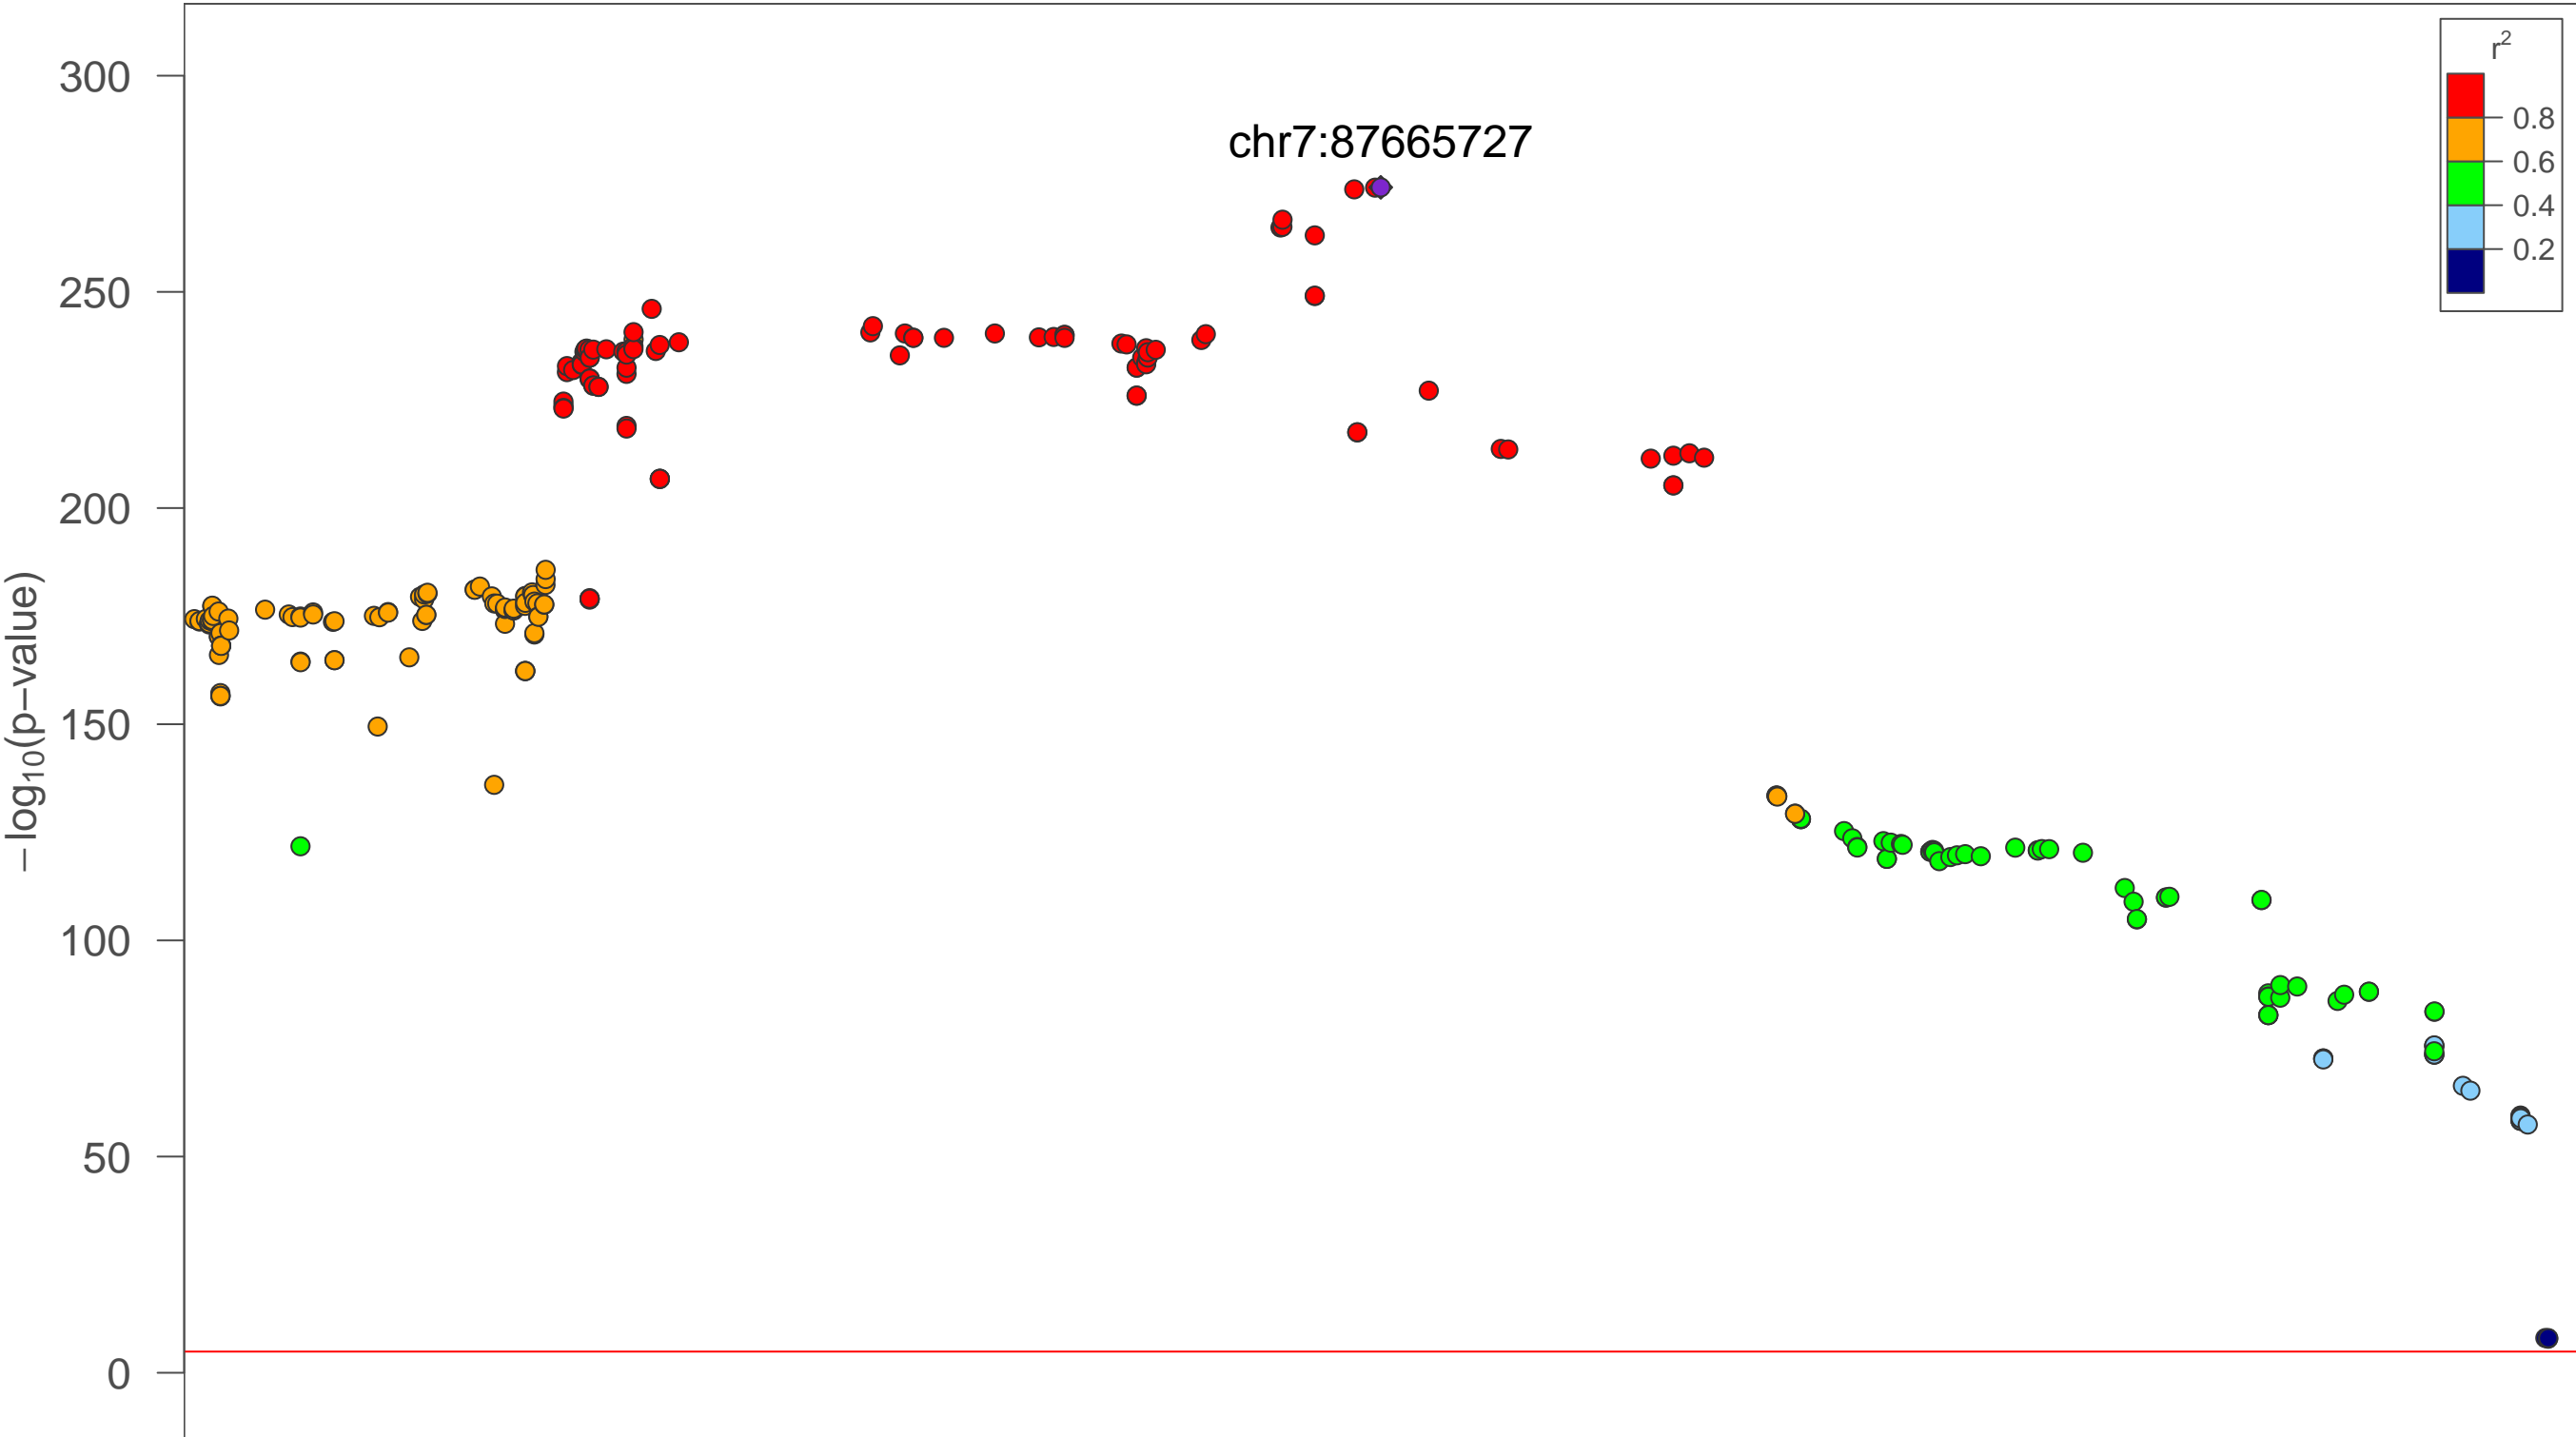

Credible Set

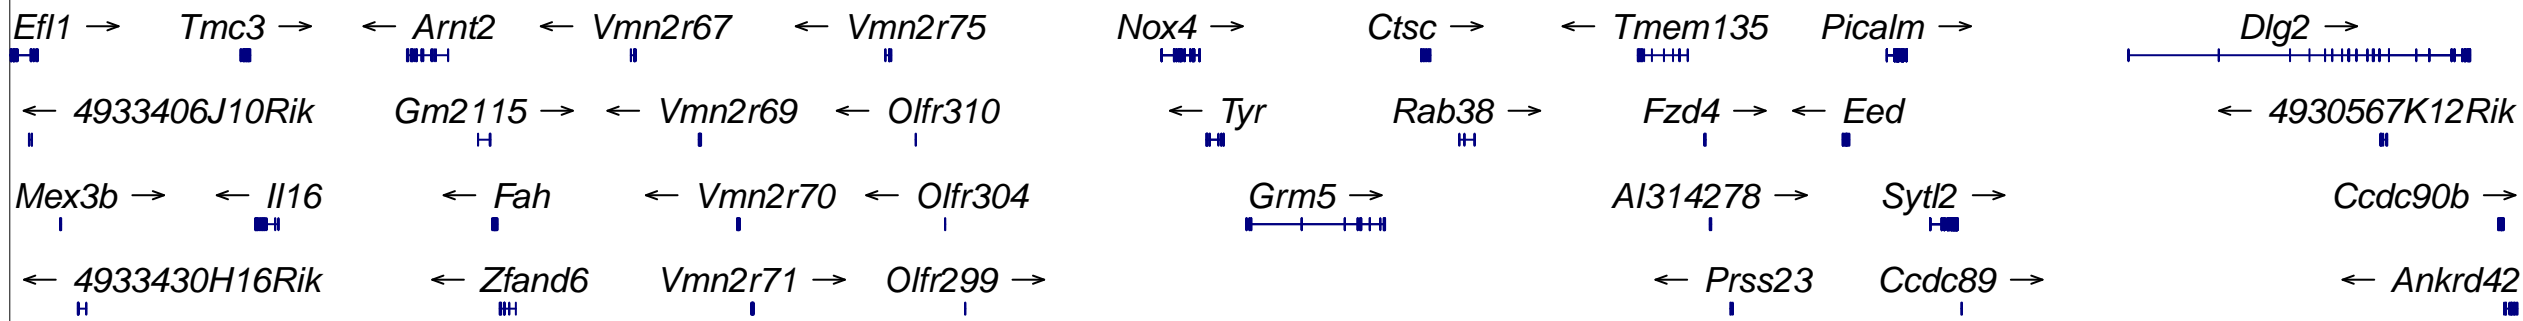

42 genes  
omitted

date: Thu Oct 25 16:58:20 2018  
build: F34F3943GBS  
display range: chr7:82665727–92665727 [82665727–92665727]  
hilite range: 0 – 0 [ 0 – 0 ]  
reference SNP: chr7:87665727  
number of SNPs plotted: 274  
min P-value: 6.71E–275 [chr7:87665727]  
max P-value: 1.33E–8 [chr7:92543164]  
omitted Genes: Stard5, Cfap161, Mesdc1  
omitted Genes: Mesdc2, Cemip, Abhd17c  
omitted Genes: 2610206C17Rik, Olfr291, Olfr290  
omitted Genes: Vmn2r65, Vmn2r66, Vmn2r68  
omitted Genes: Vmn2r72, Vmn2r73, Vmn2r74  
omitted Genes: Vmn2r76, Olfr309, Olfr308  
omitted Genes: Olfr307, Olfr305, Olfr303  
omitted Genes: Olfr301, Olfr298, Olfr297  
omitted Genes: Olfr295, Olfr294, Olfr293  
omitted Genes: Olfr292, Folh1, Vmn2r77  
omitted Genes: Vmn2r78, Vmn2r79, Me3  
omitted Genes: Ccdc81, l7Rn6, E230029C05Rik  
omitted Genes: 2310010J17Rik, Ccdc83, Crebzf  
omitted Genes: Tmem126a, Tmem126b, Pcf11



Fine-mapping Regions

| snp           | chr | pos (Mb) | pp        | group        | color  |
|---------------|-----|----------|-----------|--------------|--------|
| chr7:87554961 | 7   | 87.55496 | 0.1583967 | Credible Set | purple |
| chr7:87642045 | 7   | 87.64204 | 0.3914069 | Credible Set | purple |
| chr7:87665727 | 7   | 87.66573 | 0.4501964 | Credible Set | purple |

F34, F39–43 GBS, coat color, agouti

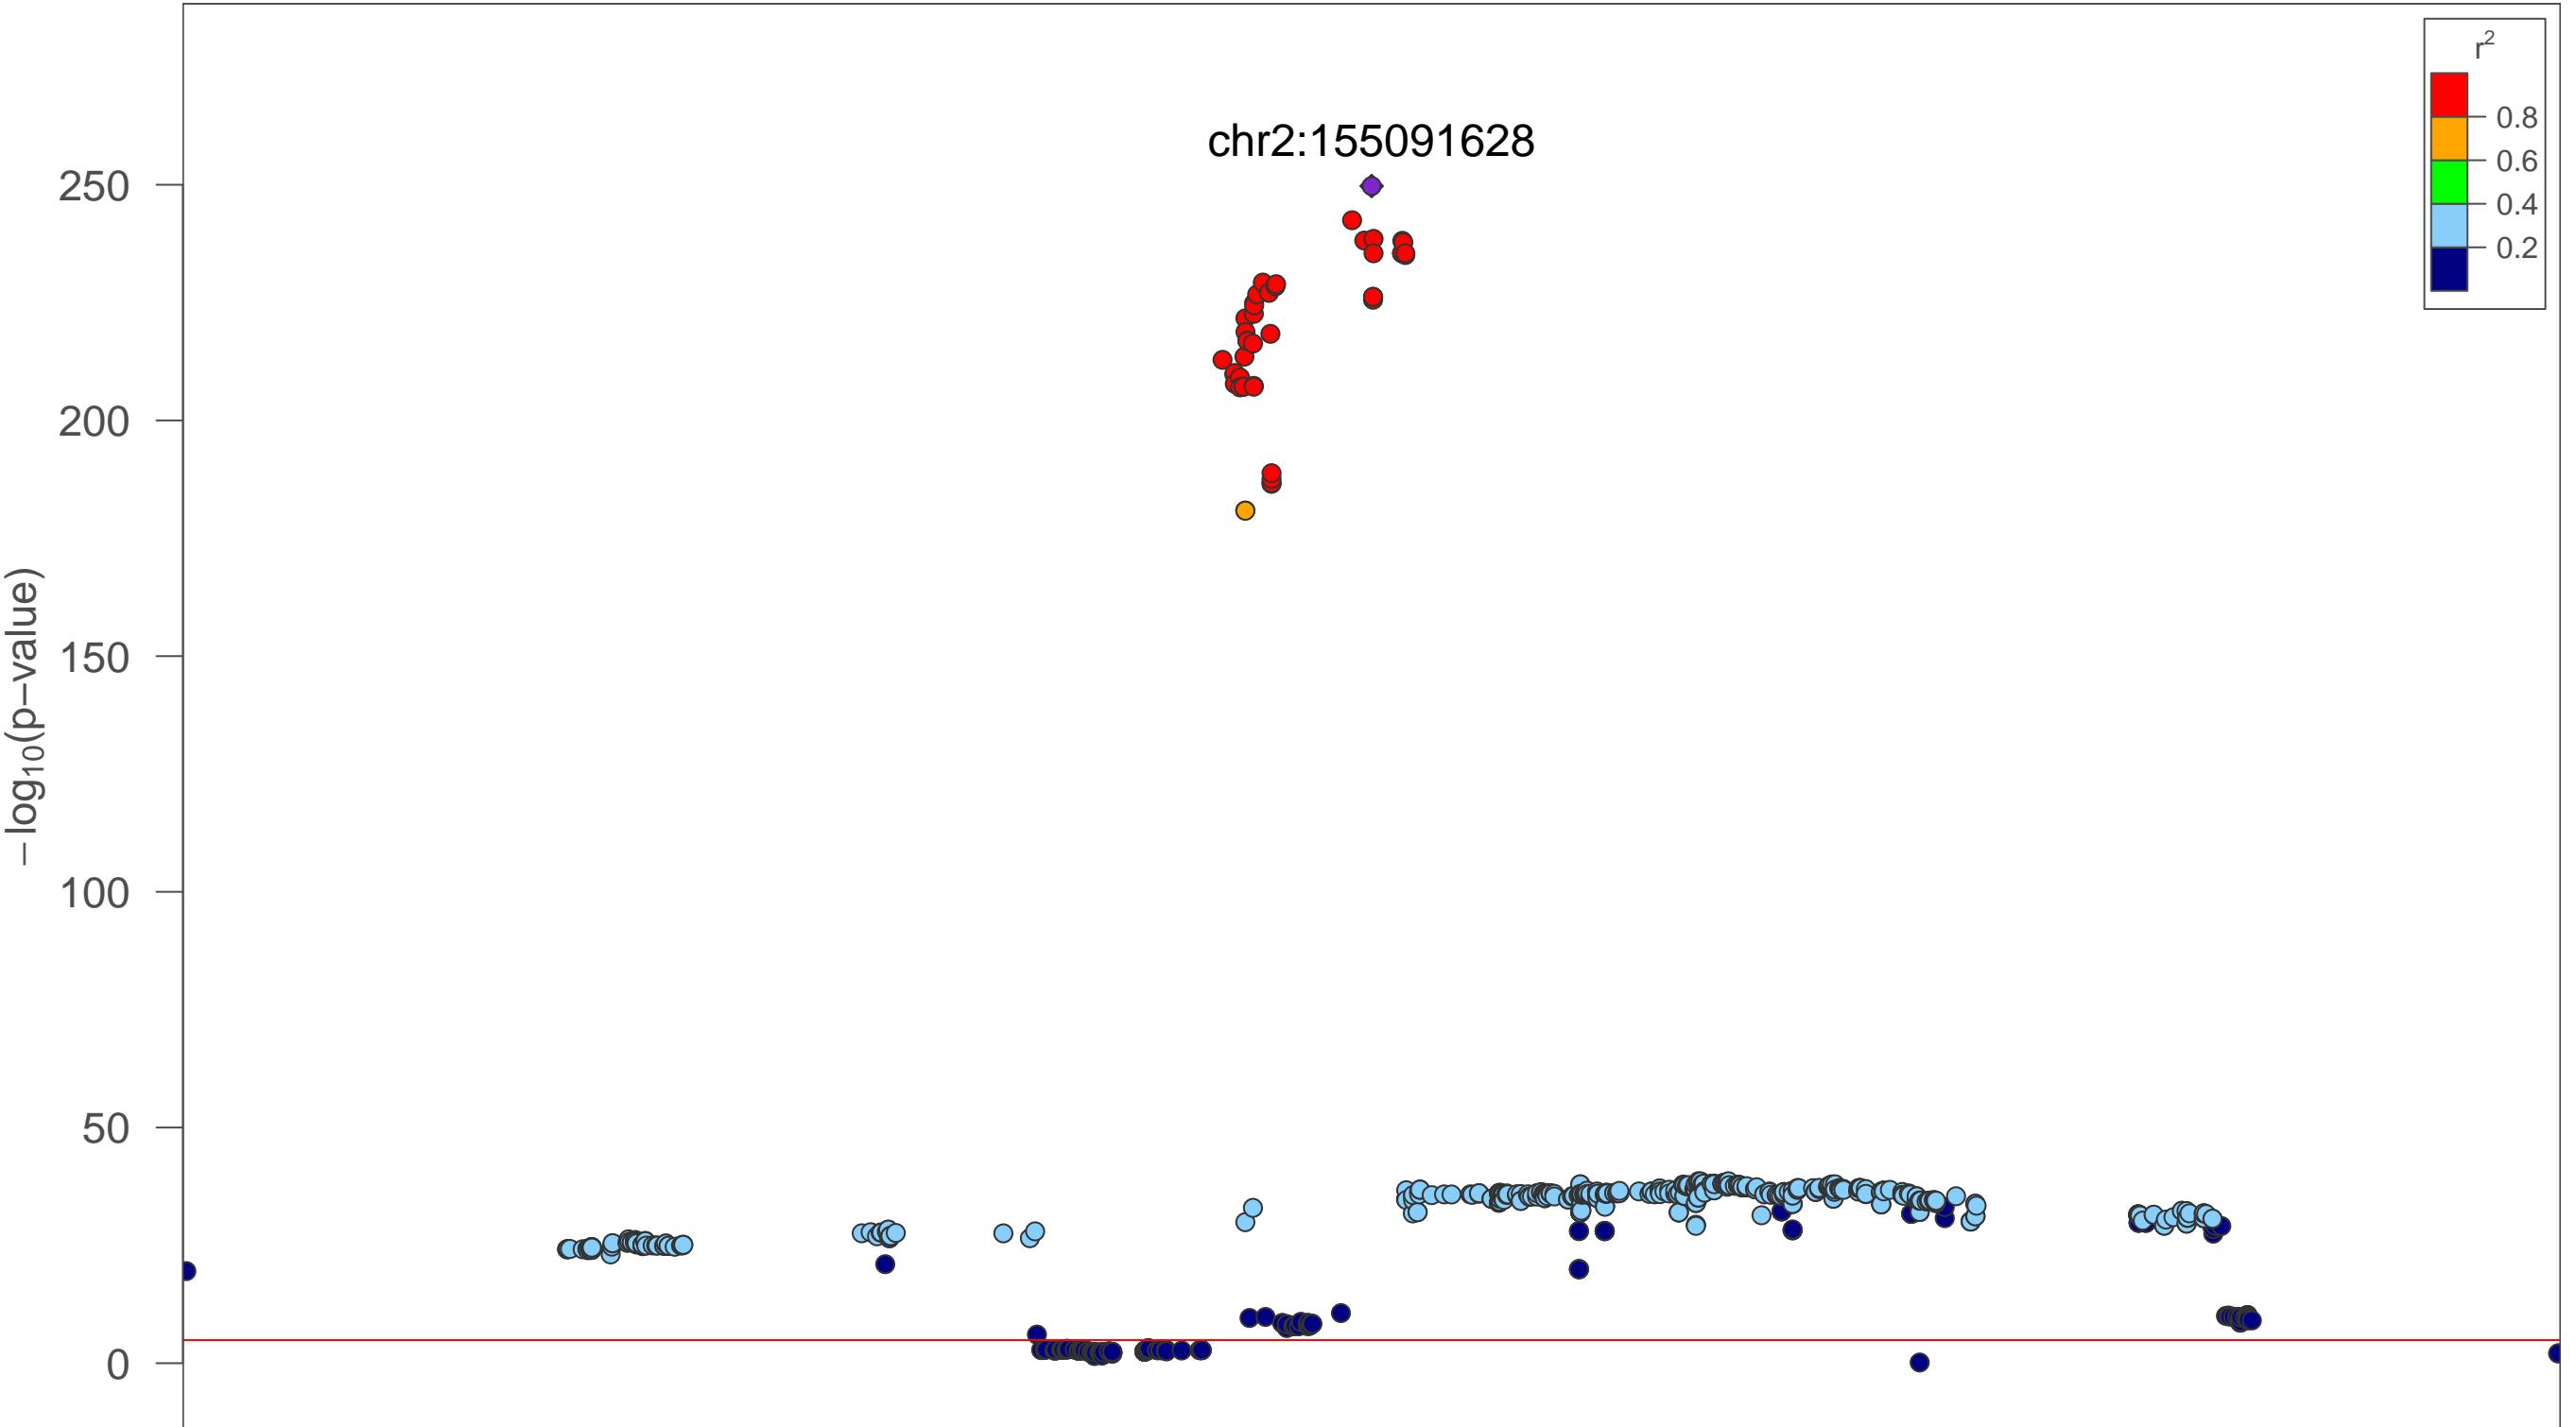

Credible Set

← *Zfp120* ← *4921509C19Rik* *Defb28* → ← *Plagl2* *Bpifb3* → ← *E2f1* *a* → ← *Ggt7* ← *Nfs1* *Myl9* → *Src* → ← *Tti1* *Actr5* →  
*Gm14139* → *Nsfl1c* → *Tbc1d20* → *Xkr7* → *Mapre1* → ← *Necab3* ← *Pigu* ← *Gdf5* *Aar2* → ← *Rbl1* *Vstm2l* → *Fam83d* →  
*Zfp937* → *Fkbp1a* → ← *Rbck1* *Ttll9* → *Dnmt3b* → ← *Snta1* ← *Ahcy* *Procr* → *Epb41l1* → ← *Mroh8* *Rprd1b* → *Dhx35* →  
*Gm14124* → *Sdcbp2* → ← *Trib3* ← *Pdrg1* *Efcab8* → *Actl10* → *Itch* → ← *Elf6* ← *Gm14169* ← *Blcap* *Bpi* → *4933416E03Rik* →

149 genes  
omitted

Position on chr2 (Mb)

date: Thu Oct 25 16:59:07 2018

build: F34F3943GBS

display range: chr2:150091628–160091628 [150091628–160091628]

hilite range: 0 – 0 [ 0 – 0 ]

reference SNP: chr2:155091628

number of SNPs plotted: 747

min P-value: 1.88E–250 [chr2:155091628]

max P-value: 6.98E–1 [chr2:157396490]

omitted Genes: 3300002I08Rik, Zfp442, Zfp345

omitted Genes: Cst7, Apmmap, Acss1

omitted Genes: E130215H24Rik, Vsx1, Entpd6

omitted Genes: Pygb, Abhd12, Gins1

omitted Genes: Ninl, Nanp, Gm14151

omitted Genes: 4930442J19Rik, LOC100125594, Snph

omitted Genes: Rad21l, Tmem74b, Psmf1

omitted Genes: Rspo4, Angpt4, Mir1953

omitted Genes: Fam110a, Slc52a3, Scrt2

omitted Genes: Srxn1, Tcf15, Csnk2a1

omitted Genes: Gm14164, Nrsn2, Sox12

omitted Genes: Zcchc3, 6820408C15Rik, Defb23

omitted Genes: Defb20, Defb22, Defb26

omitted Genes: Defb29, Defb21, Defb19

omitted Genes: Defb45, Defb36, Defb25

omitted Genes: Rem1, H13, Mcts2

omitted Genes: Id1, Cox4i2, Bcl2l1

omitted Genes: Tpx2, Mir5622, Mylk2

omitted Genes: Foxs1, Dusp15, Ccm2l

omitted Genes: Hck, Tm9sf4, Tspyl3

omitted Genes: Pofut1, Kif3b, 2500004C02Rik

omitted Genes: Asxl1, Nol4l, Commd7

omitted Genes: Sun5, Bpifb2, Bpifb6

omitted Genes: Bpifb4, Bpifa6, Bpifa2

omitted Genes: Bpifa3, Bpifa1, Bpifa5

omitted Genes: Bpifb1, Bpifb5, Bpifb9a

omitted Genes: Bpifb9b, Cdk5rap1, Cbfa2t2

omitted Genes: 1700003F12Rik, Pxmp4, Zfp341

omitted Genes: Chmp4b, Raly, Eif2s2

omitted Genes: 2310005A03Rik, Dynlrb1, Map1lc3a

omitted Genes: Mir695, Trp53inp2, Ncapg

omitted Genes: Acss2, Acss2as, Gcs

Make more plots at <http://csg.sph.umich.edu/locuszoom/>

Fine-mapping Regions

| snp            | chr | pos (Mb) | pp        | group        | color  |
|----------------|-----|----------|-----------|--------------|--------|
| chr2:155091628 | 2   | 155.0916 | 0.9999999 | Credible Set | purple |

F34, F39–43 GBS, locomotor test day 1, total distance travelled in 30min (cm)

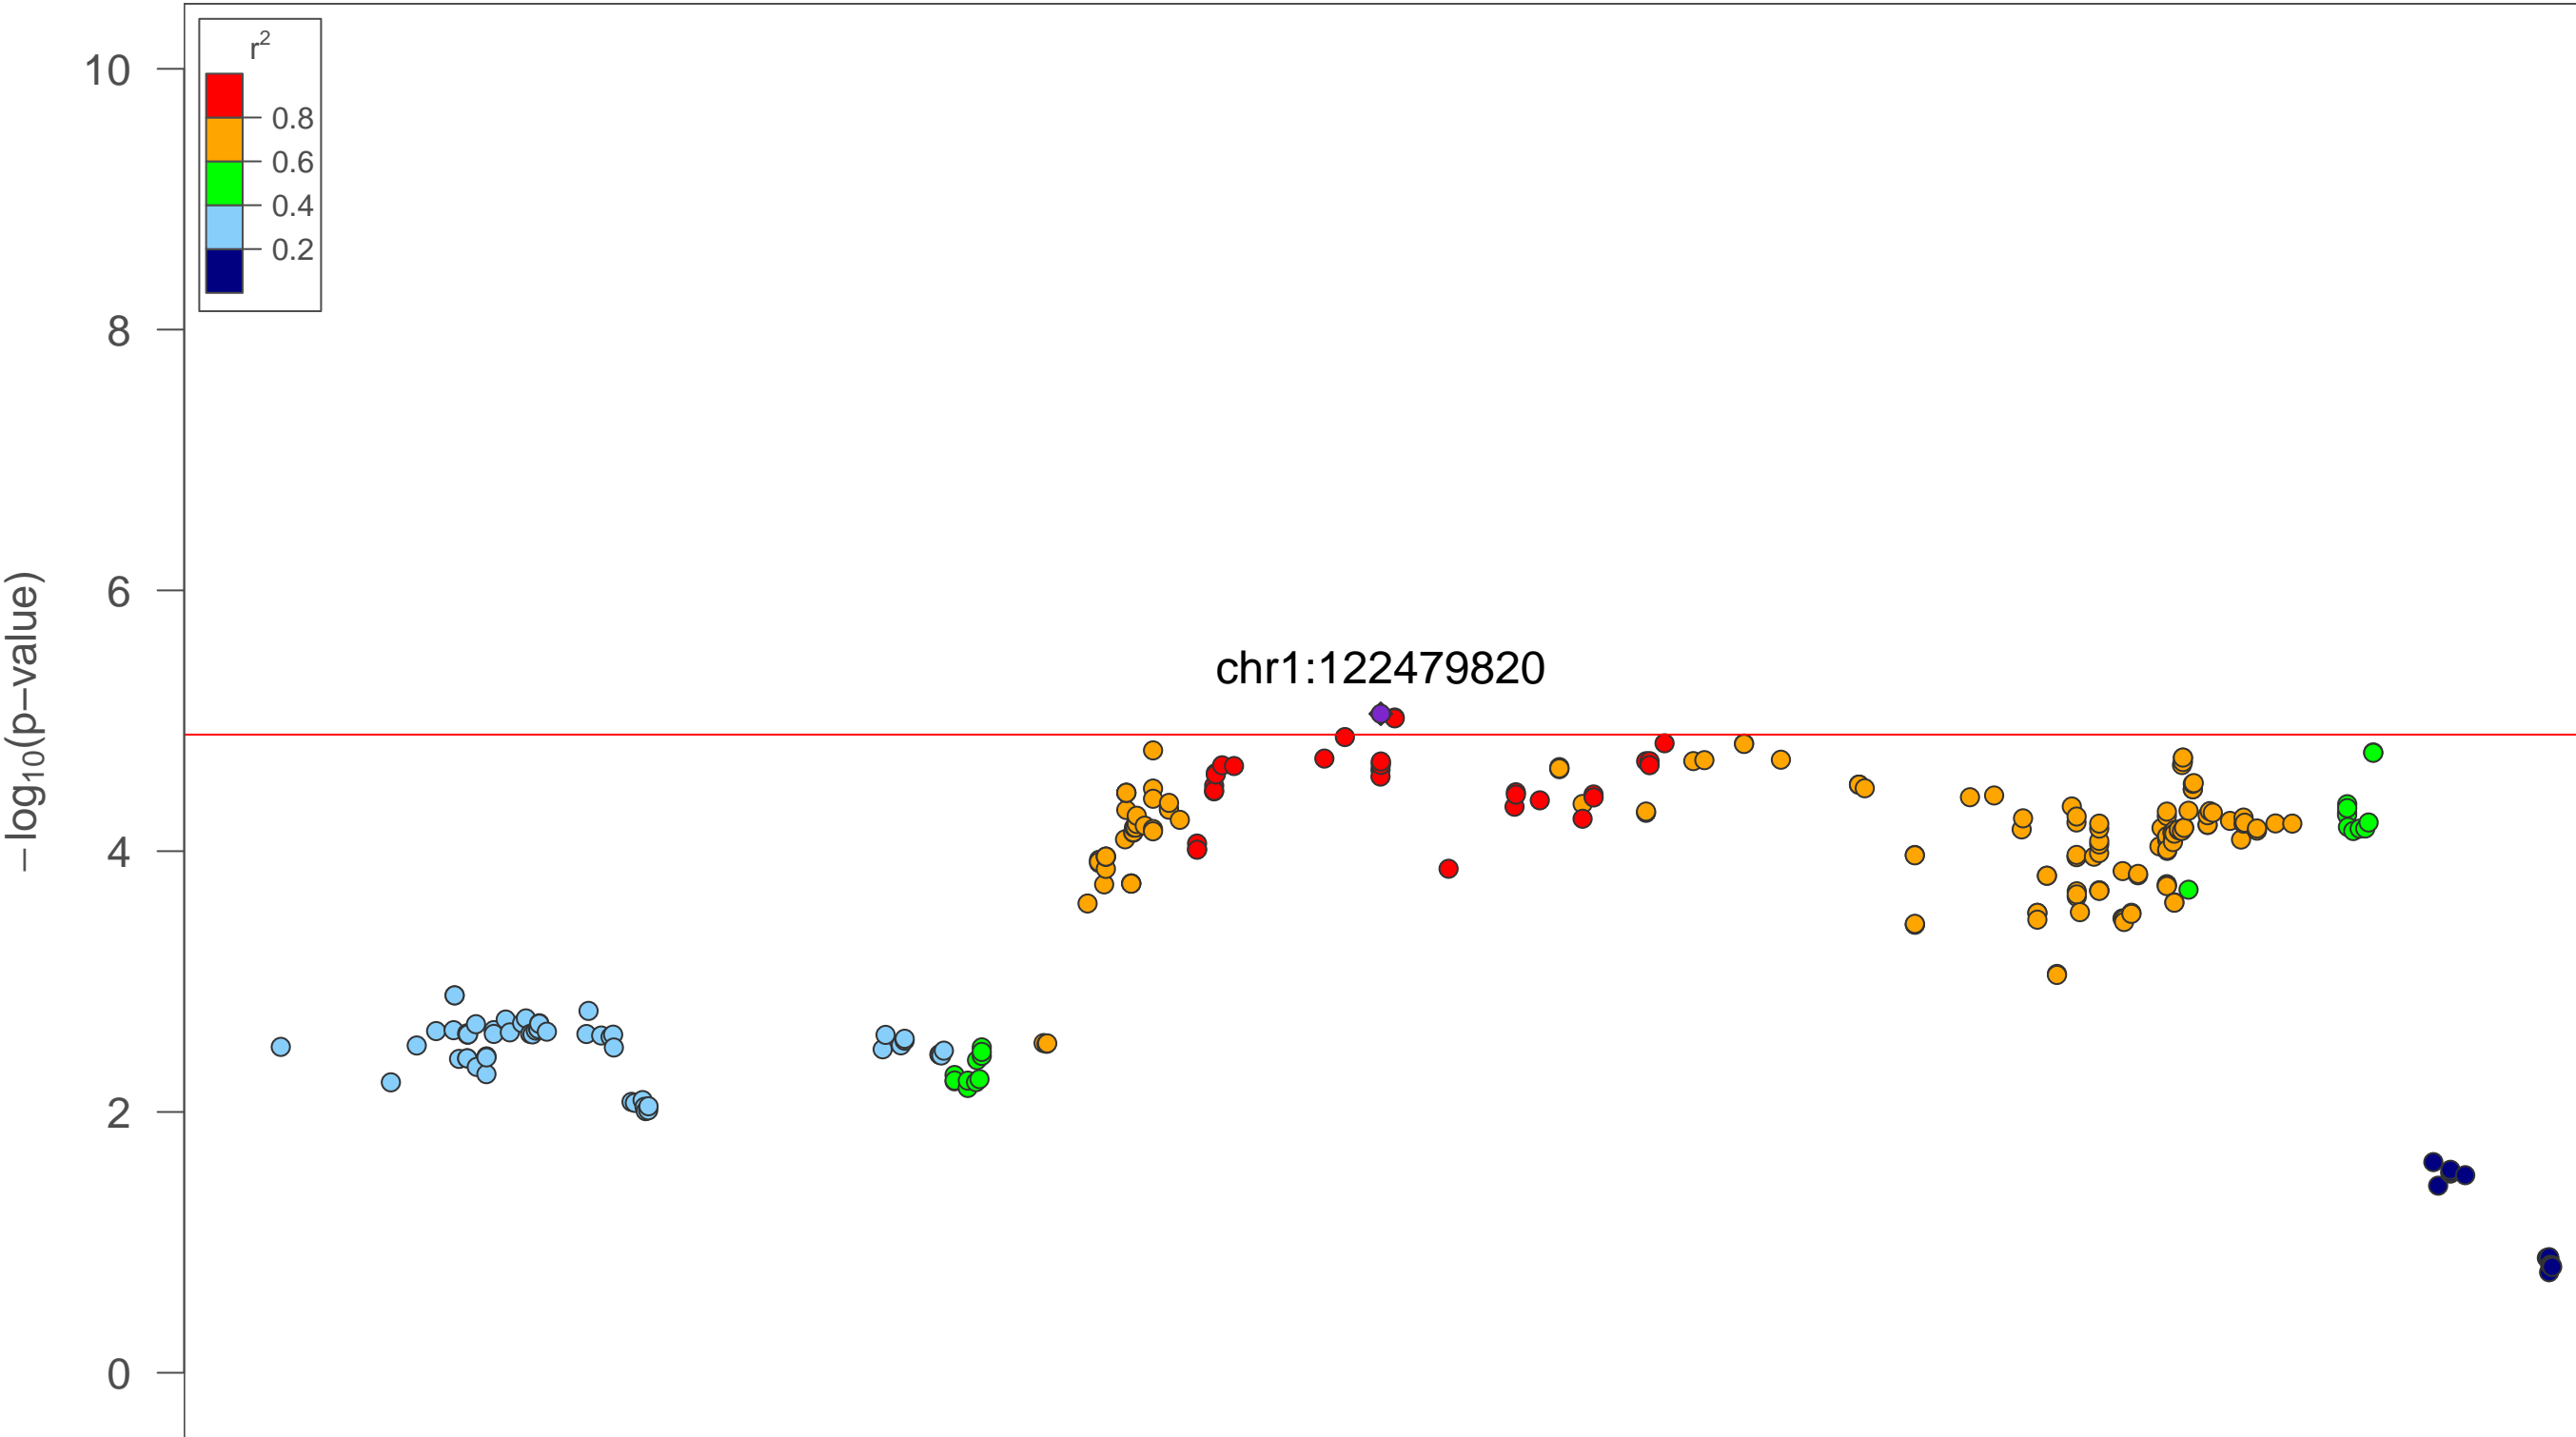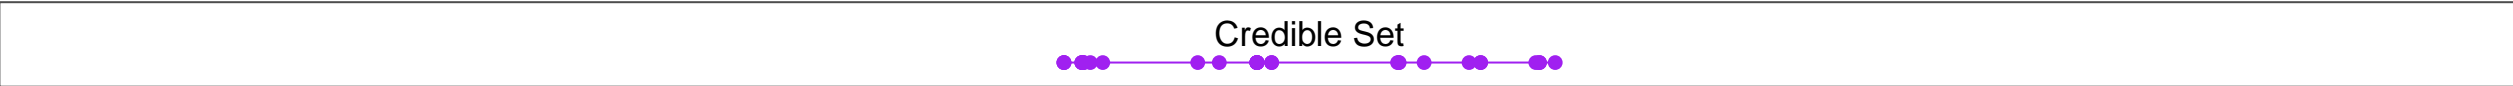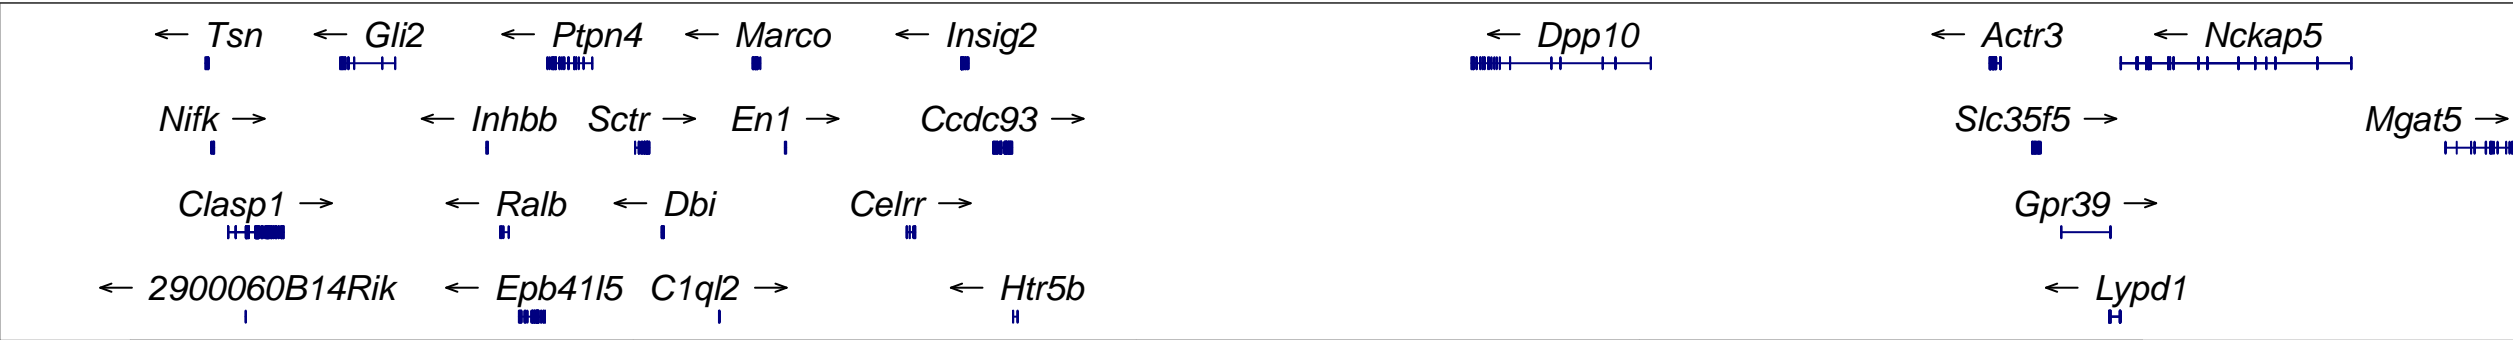

10 genes  
omitted

date: Thu Oct 25 16:59:22 2018

build: F34F3943GBS

display range: chr1:117479820–127479820 [117479820–127479820]

hilite range: 0 – 0 [ 0 – 0 ]

reference SNP: chr1:122479820

number of SNPs plotted: 268

min P-value: 8.84E–6 [chr1:122479820]

max P-value: 1.69E–1 [chr1:127361132]

omitted Genes: Tfcp2l1, Mir6346, Tmem185b

omitted Genes: 3830432H09Rik, Tmem177, Cfap221

omitted Genes: Tmem37, 3110009E18Rik, Steap3

omitted Genes: Ddx18

## Fine-mapping Regions

| snp            | chr | pos (Mb) | pp          | group        | color  |
|----------------|-----|----------|-------------|--------------|--------|
| chr1:121712291 | 1   | 121.7123 | 0.008285125 | Credible Set | purple |
| chr1:121712326 | 1   | 121.7123 | 0.009119169 | Credible Set | purple |
| chr1:121712327 | 1   | 121.7123 | 0.008217150 | Credible Set | purple |
| chr1:121783108 | 1   | 121.7831 | 0.021818801 | Credible Set | purple |
| chr1:121783777 | 1   | 121.7838 | 0.023997232 | Credible Set | purple |
| chr1:121783797 | 1   | 121.7838 | 0.022021202 | Credible Set | purple |
| chr1:121790517 | 1   | 121.7905 | 0.029622818 | Credible Set | purple |
| chr1:121790555 | 1   | 121.7906 | 0.028975381 | Credible Set | purple |
| chr1:121817004 | 1   | 121.8170 | 0.033807004 | Credible Set | purple |
| chr1:121866576 | 1   | 121.8666 | 0.033392468 | Credible Set | purple |
| chr1:122244126 | 1   | 122.2441 | 0.037839710 | Credible Set | purple |
| chr1:122329939 | 1   | 122.3299 | 0.054349426 | Credible Set | purple |
| chr1:122478661 | 1   | 122.4787 | 0.031348898 | Credible Set | purple |
| chr1:122478665 | 1   | 122.4787 | 0.027951382 | Credible Set | purple |
| chr1:122479820 | 1   | 122.4798 | 0.080446064 | Credible Set | purple |
| chr1:122480027 | 1   | 122.4800 | 0.035461975 | Credible Set | purple |
| chr1:122480078 | 1   | 122.4801 | 0.034018495 | Credible Set | purple |
| chr1:122480093 | 1   | 122.4801 | 0.036042672 | Credible Set | purple |
| chr1:122537959 | 1   | 122.5380 | 0.075581861 | Credible Set | purple |
| chr1:122537965 | 1   | 122.5380 | 0.074489582 | Credible Set | purple |
| chr1:123038644 | 1   | 123.0386 | 0.016858419 | Credible Set | purple |
| chr1:123044323 | 1   | 123.0443 | 0.021494377 | Credible Set | purple |
| chr1:123044326 | 1   | 123.0443 | 0.020646374 | Credible Set | purple |
| chr1:123144261 | 1   | 123.1443 | 0.018770743 | Credible Set | purple |
| chr1:123322958 | 1   | 123.3230 | 0.013793158 | Credible Set | purple |
| chr1:123368825 | 1   | 123.3688 | 0.020709950 | Credible Set | purple |
| chr1:123369170 | 1   | 123.3692 | 0.019699584 | Credible Set | purple |
| chr1:123588436 | 1   | 123.5884 | 0.036196853 | Credible Set | purple |
| chr1:123602768 | 1   | 123.6028 | 0.036249469 | Credible Set | purple |
| chr1:123603027 | 1   | 123.6030 | 0.033855107 | Credible Set | purple |
| chr1:123665450 | 1   | 123.6655 | 0.048953134 | Credible Set | purple |

F34, F39–43 GBS, locomotor test day 1, total distance travelled in 30min (cm)

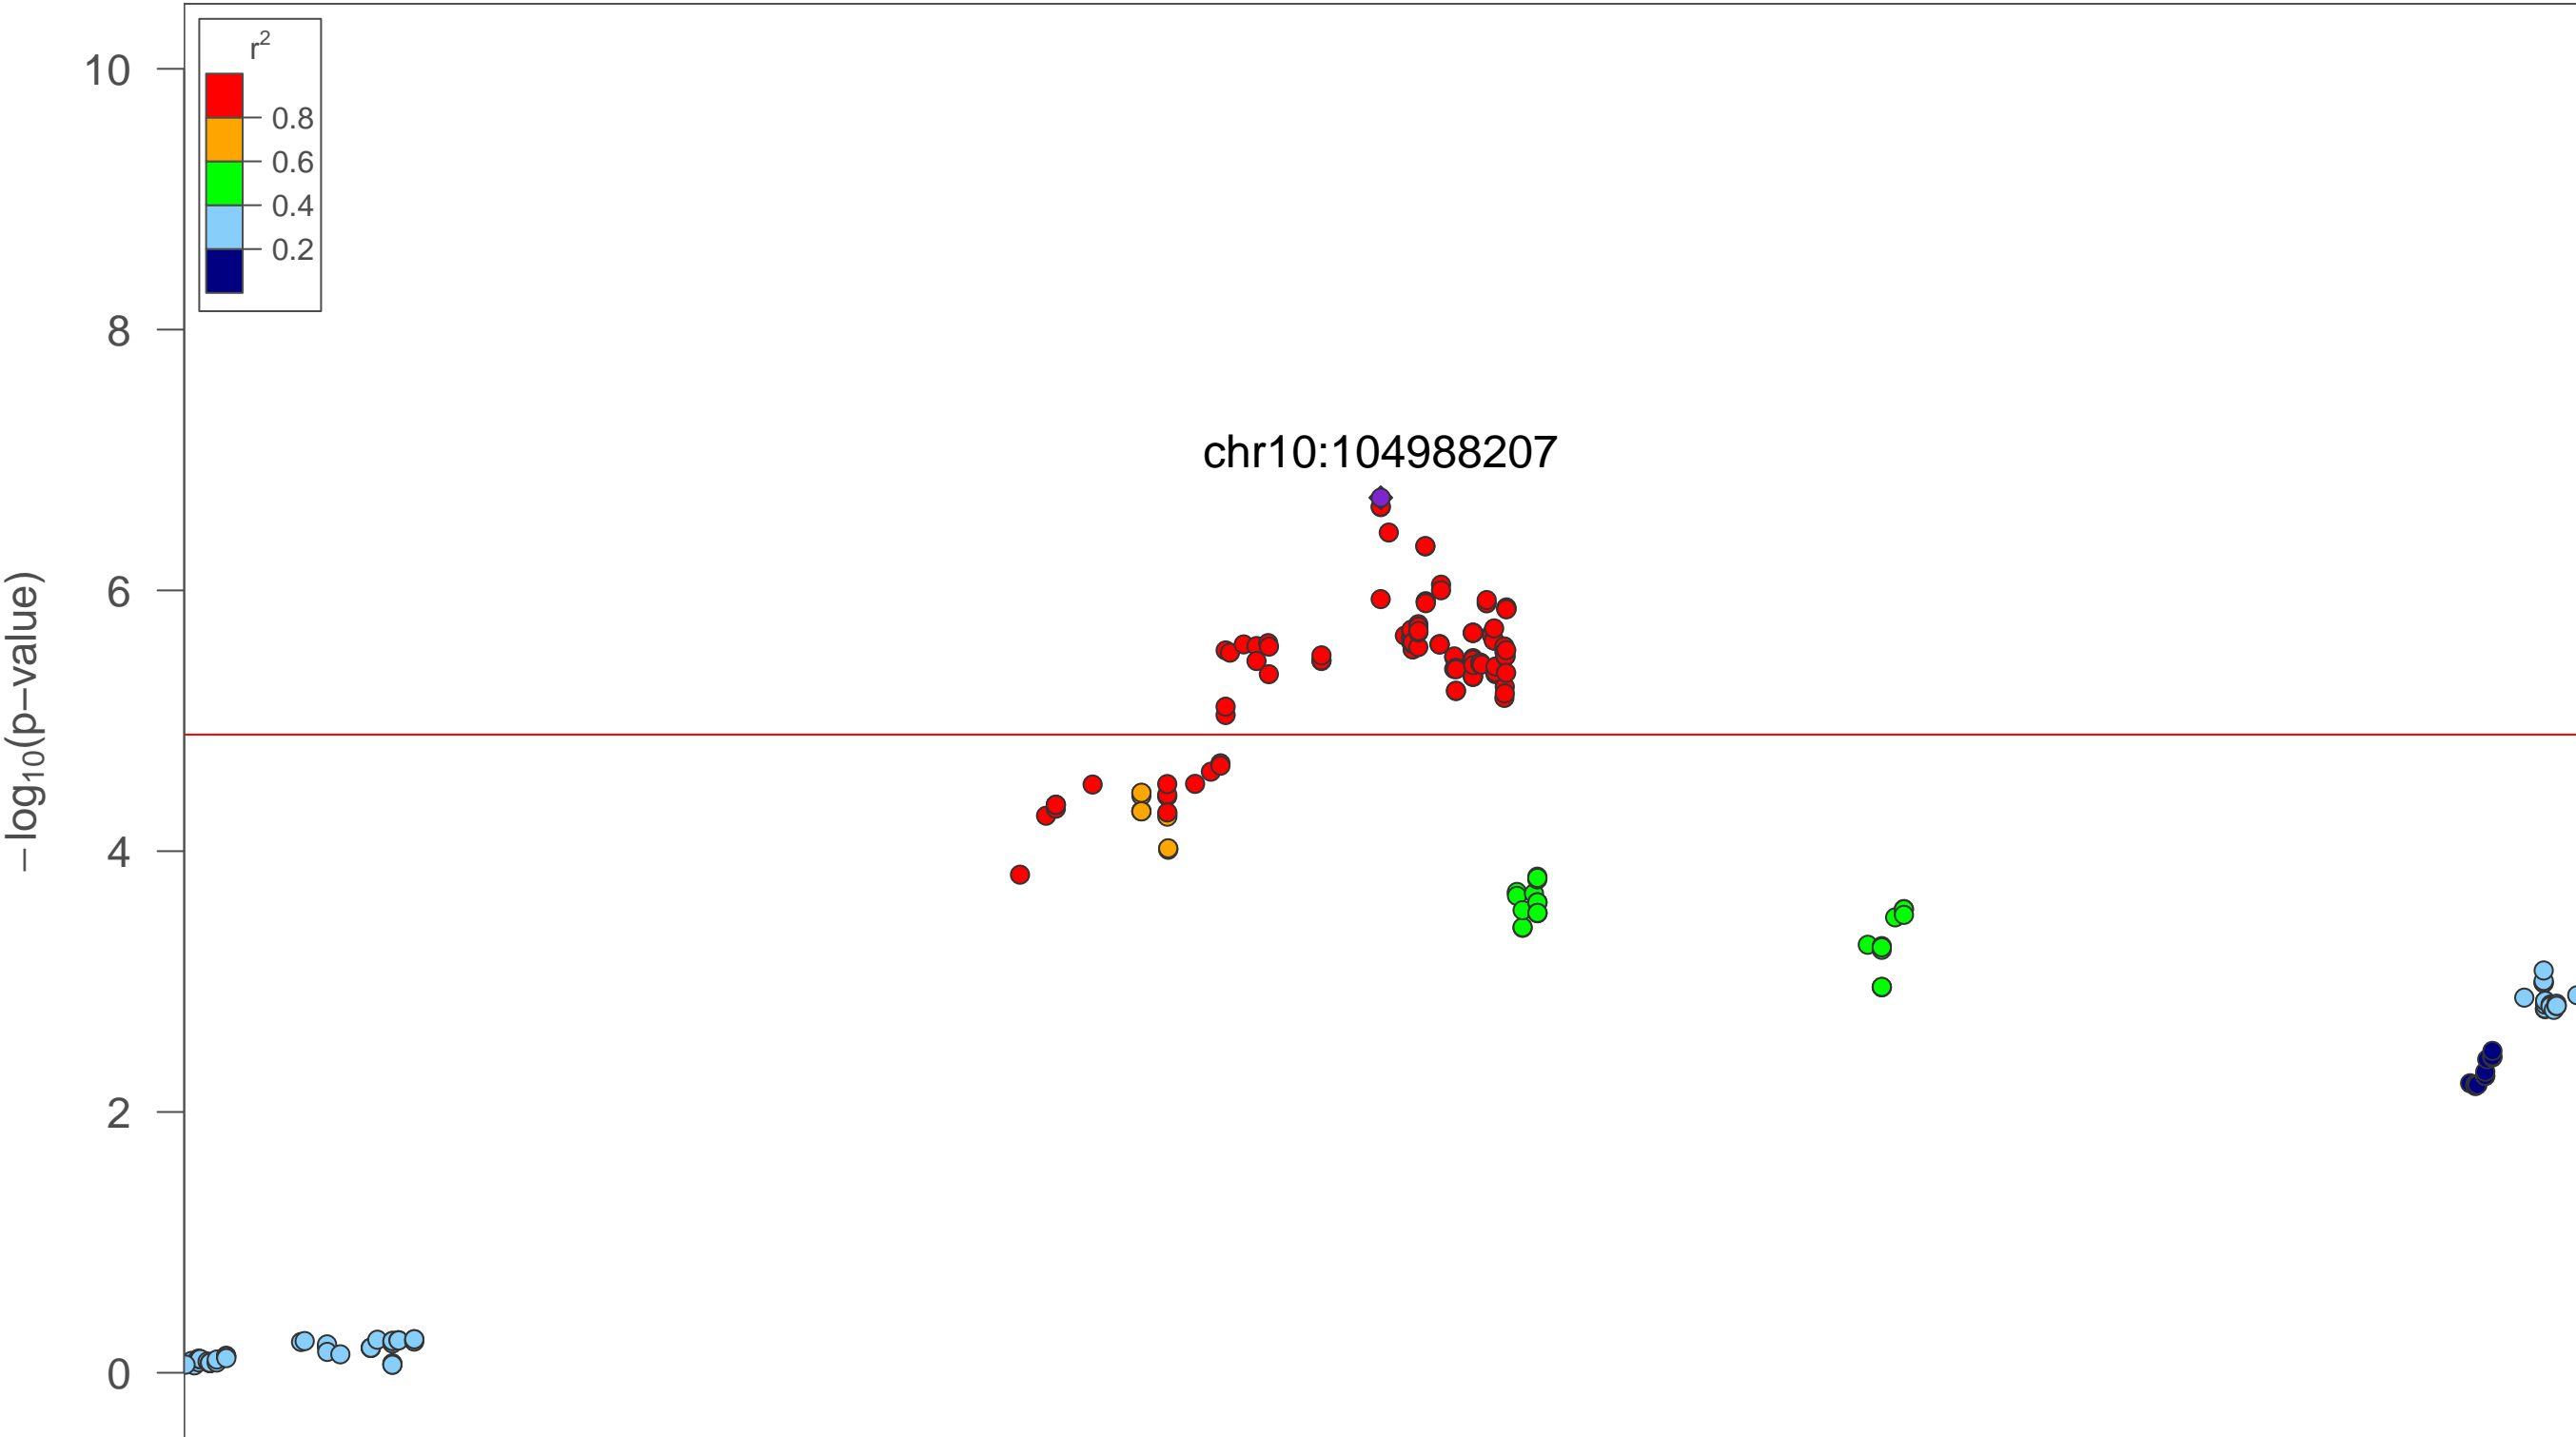

Credible Set

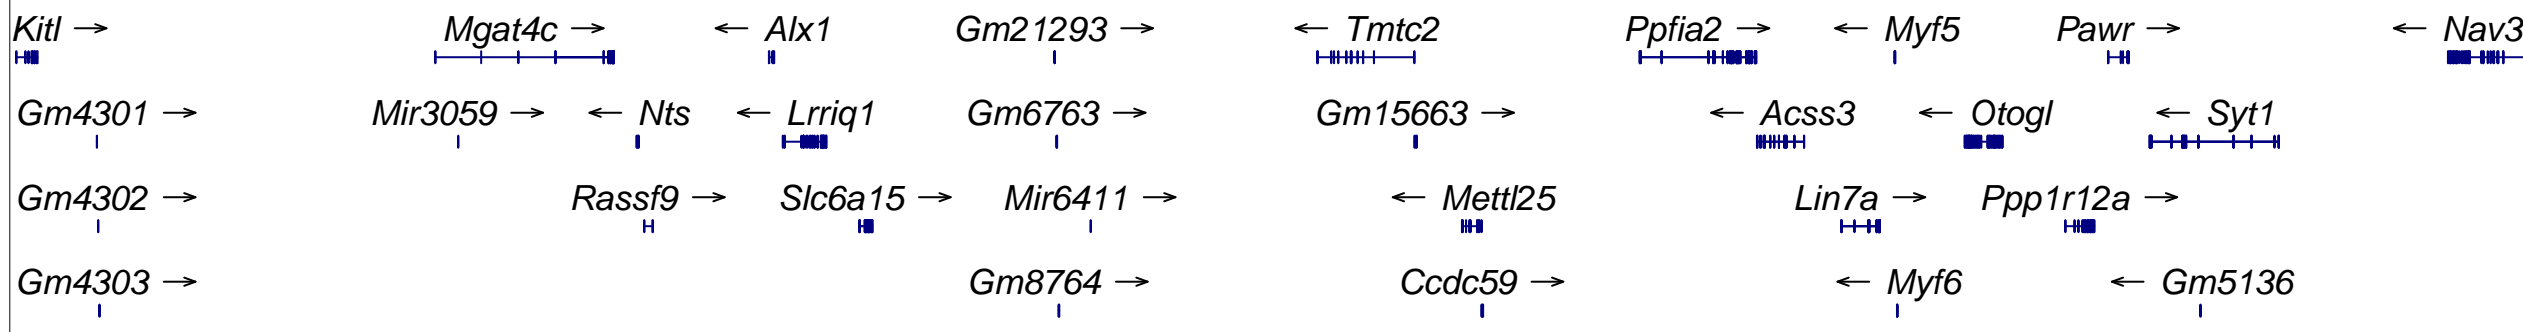

14 genes  
omitted



date: Thu Oct 25 16:59:15 2018

build: F34F3943GBS

display range: chr10:99988207–109988207 [99988207–109988207]

hilite range: 0 – 0 [ 0 – 0 ]

reference SNP: chr10:104988207

number of SNPs plotted: 216

min P-value: 1.94E–7 [chr10:104988207]

max P-value: 8.78E–1 [chr10:100031691]

omitted Genes: Gm4305, Gm4307, Gm4312

omitted Genes: Tmtc3, Cep290, 4930430F08Rik

omitted Genes: 1700017N19Rik, Gm21304, Gm21312

omitted Genes: Gm20765, Gm4340, 4930532I03Rik

omitted Genes: Ptprq, Gm29685

Fine-mapping Regions

| snp             | chr | pos (Mb) | pp | group        | color  |
|-----------------|-----|----------|----|--------------|--------|
| chr10:103480830 | 10  | 103.4808 | 0  | Credible Set | purple |

F34, F39–43 GBS, locomotor test day 2, total distance travelled in 30min (cm)

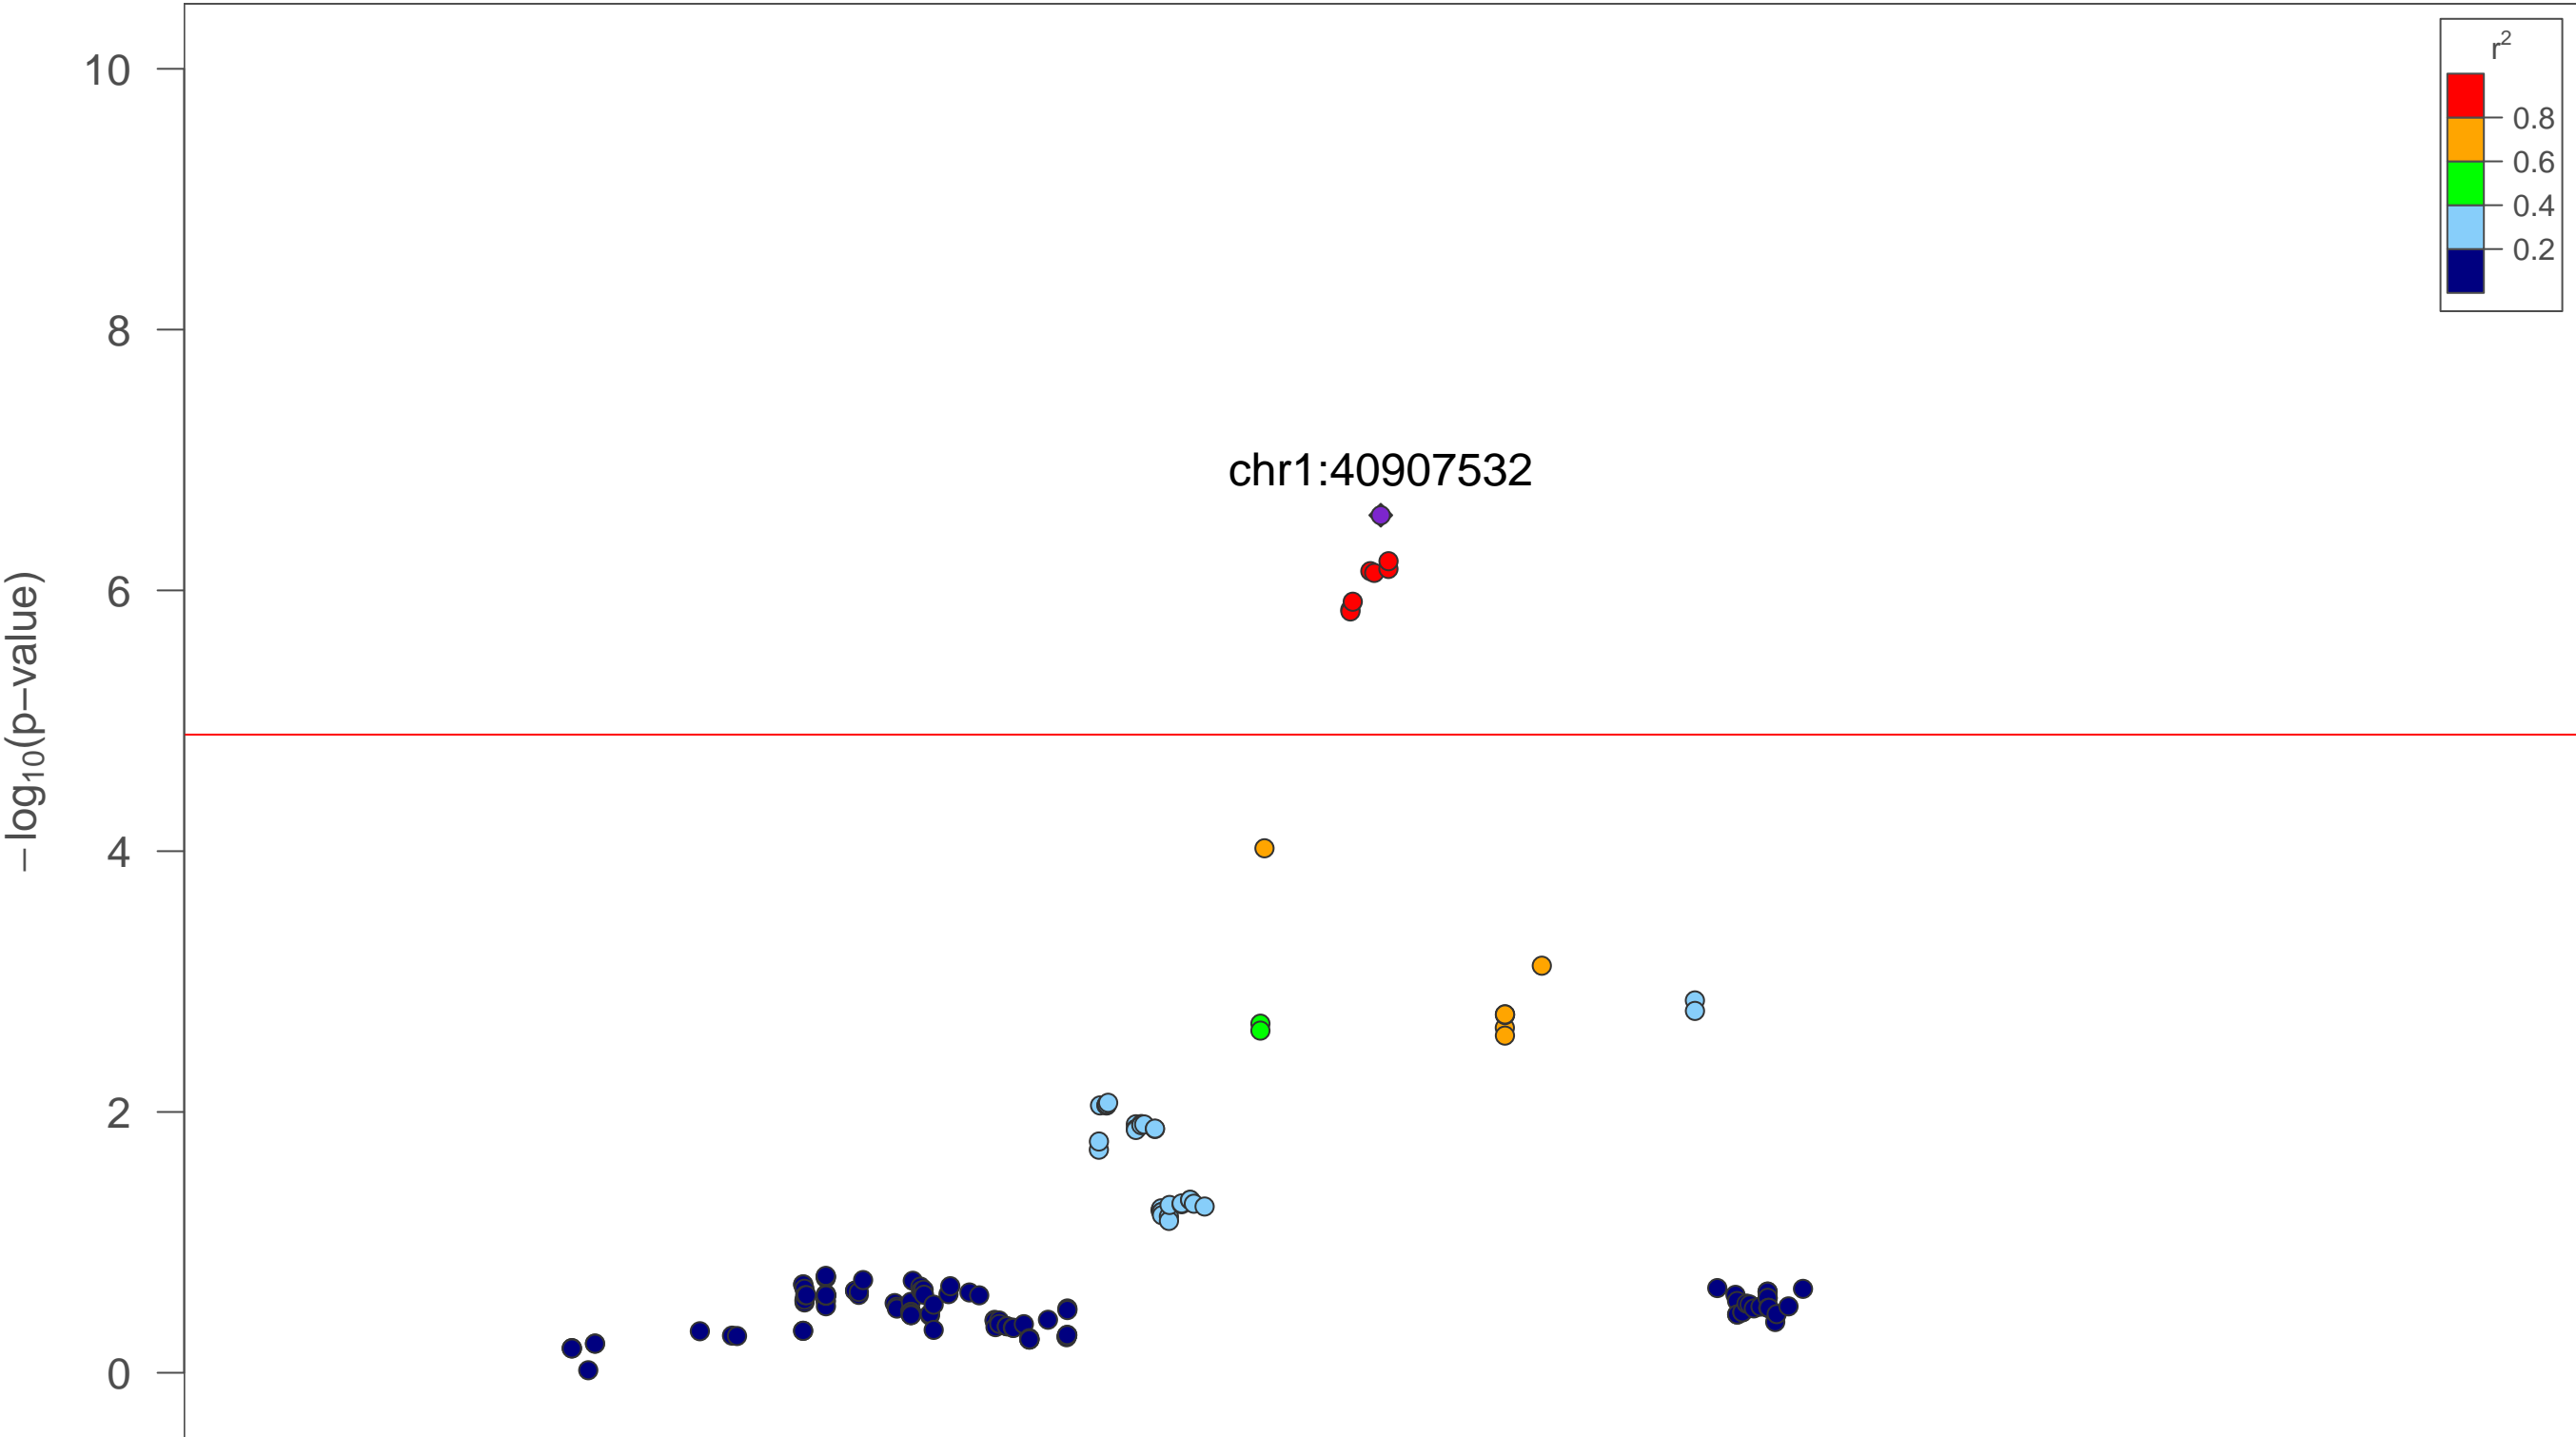

Credible Set

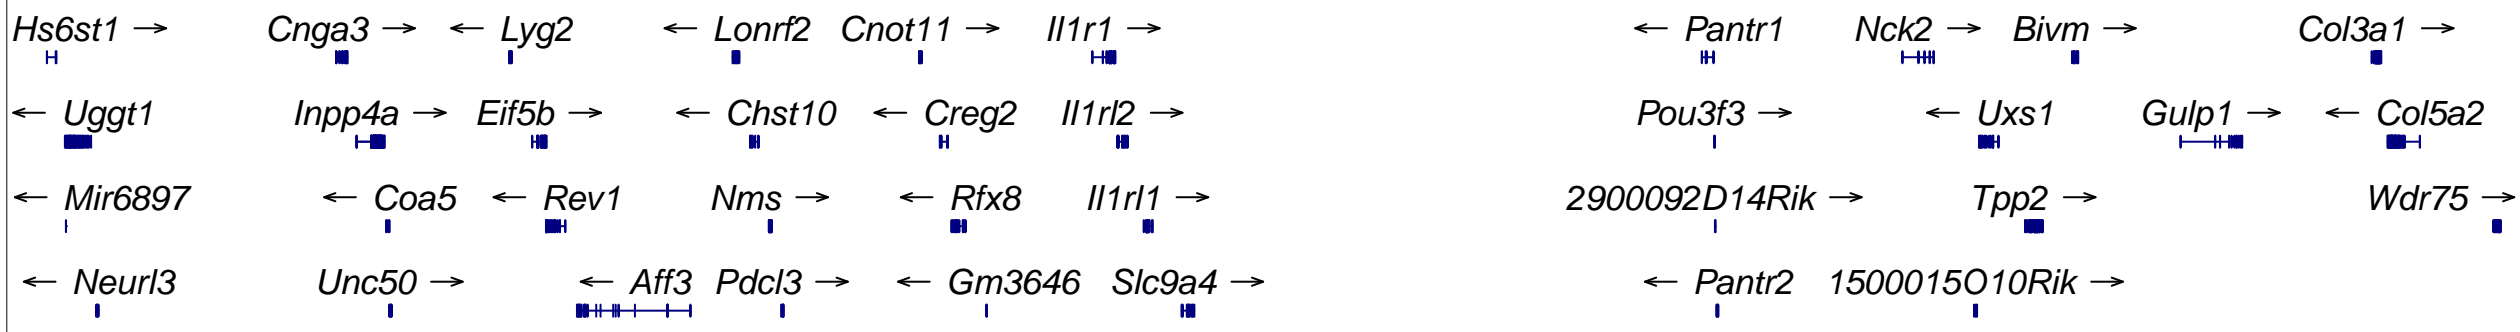

53 genes  
omitted

Position on chr1 (Mb)

date: Thu Oct 25 16:59:39 2018  
build: F34F3943GBS  
display range: chr1:35907532–45907532 [35907532–45907532]  
hilite range: 0 – 0 [ 0 – 0 ]  
reference SNP: chr1:40907532  
number of SNPs plotted: 157  
min P-value: 2.65E–7 [chr1:40907532]  
max P-value: 9.56E–1 [chr1:37596381]  
omitted Genes: Arid5a, Kansl3, Mir6898  
omitted Genes: Fer1l5, Lman2l, Cnnm4  
omitted Genes: Cnnm3, Ankrd23, Ankrd39  
omitted Genes: Sema4c, Fam178b, Cox5b  
omitted Genes: Actr1b, 4933424G06Rik, Zap70  
omitted Genes: Tmem131, Mgat4a, 4930594C11Rik  
omitted Genes: 2010300C02Rik, Tsga10, Lipt1  
omitted Genes: Mitd1, Mrpl30, Lyg1  
omitted Genes: Txndc9, Mir6349, Npas2  
omitted Genes: Rpl31, Tbc1d8, Snord89  
omitted Genes: Rnf149, 1700066B17Rik, Map4k4  
omitted Genes: Gm16894, Il1r2, Il18r1  
omitted Genes: Il18rap, Slc9a2, Mfsd9  
omitted Genes: Tmem182, 4930448I06Rik, Dalir  
omitted Genes: Mrps9, Gpr45, Tgfbrap1  
omitted Genes: AI597479, Fhl2, Mettl21c  
omitted Genes: Tex30, Kdelc1, Ercc5  
omitted Genes: Mettl21e, 4930521E06Rik

Fine-mapping Regions

| snp           | chr | pos (Mb) | pp         | group        | color  |
|---------------|-----|----------|------------|--------------|--------|
| chr1:40780351 | 1   | 40.78035 | 0.06182924 | Credible Set | purple |
| chr1:40780677 | 1   | 40.78068 | 0.05996952 | Credible Set | purple |
| chr1:40790450 | 1   | 40.79045 | 0.07076768 | Credible Set | purple |
| chr1:40863930 | 1   | 40.86393 | 0.11903013 | Credible Set | purple |
| chr1:40880208 | 1   | 40.88021 | 0.11549377 | Credible Set | purple |
| chr1:40907532 | 1   | 40.90753 | 0.30844609 | Credible Set | purple |
| chr1:40939551 | 1   | 40.93955 | 0.12347079 | Credible Set | purple |
| chr1:40939963 | 1   | 40.93996 | 0.14099278 | Credible Set | purple |

F34, F39–43 GBS, locomotor test day 2, total distance travelled in 30min (cm)

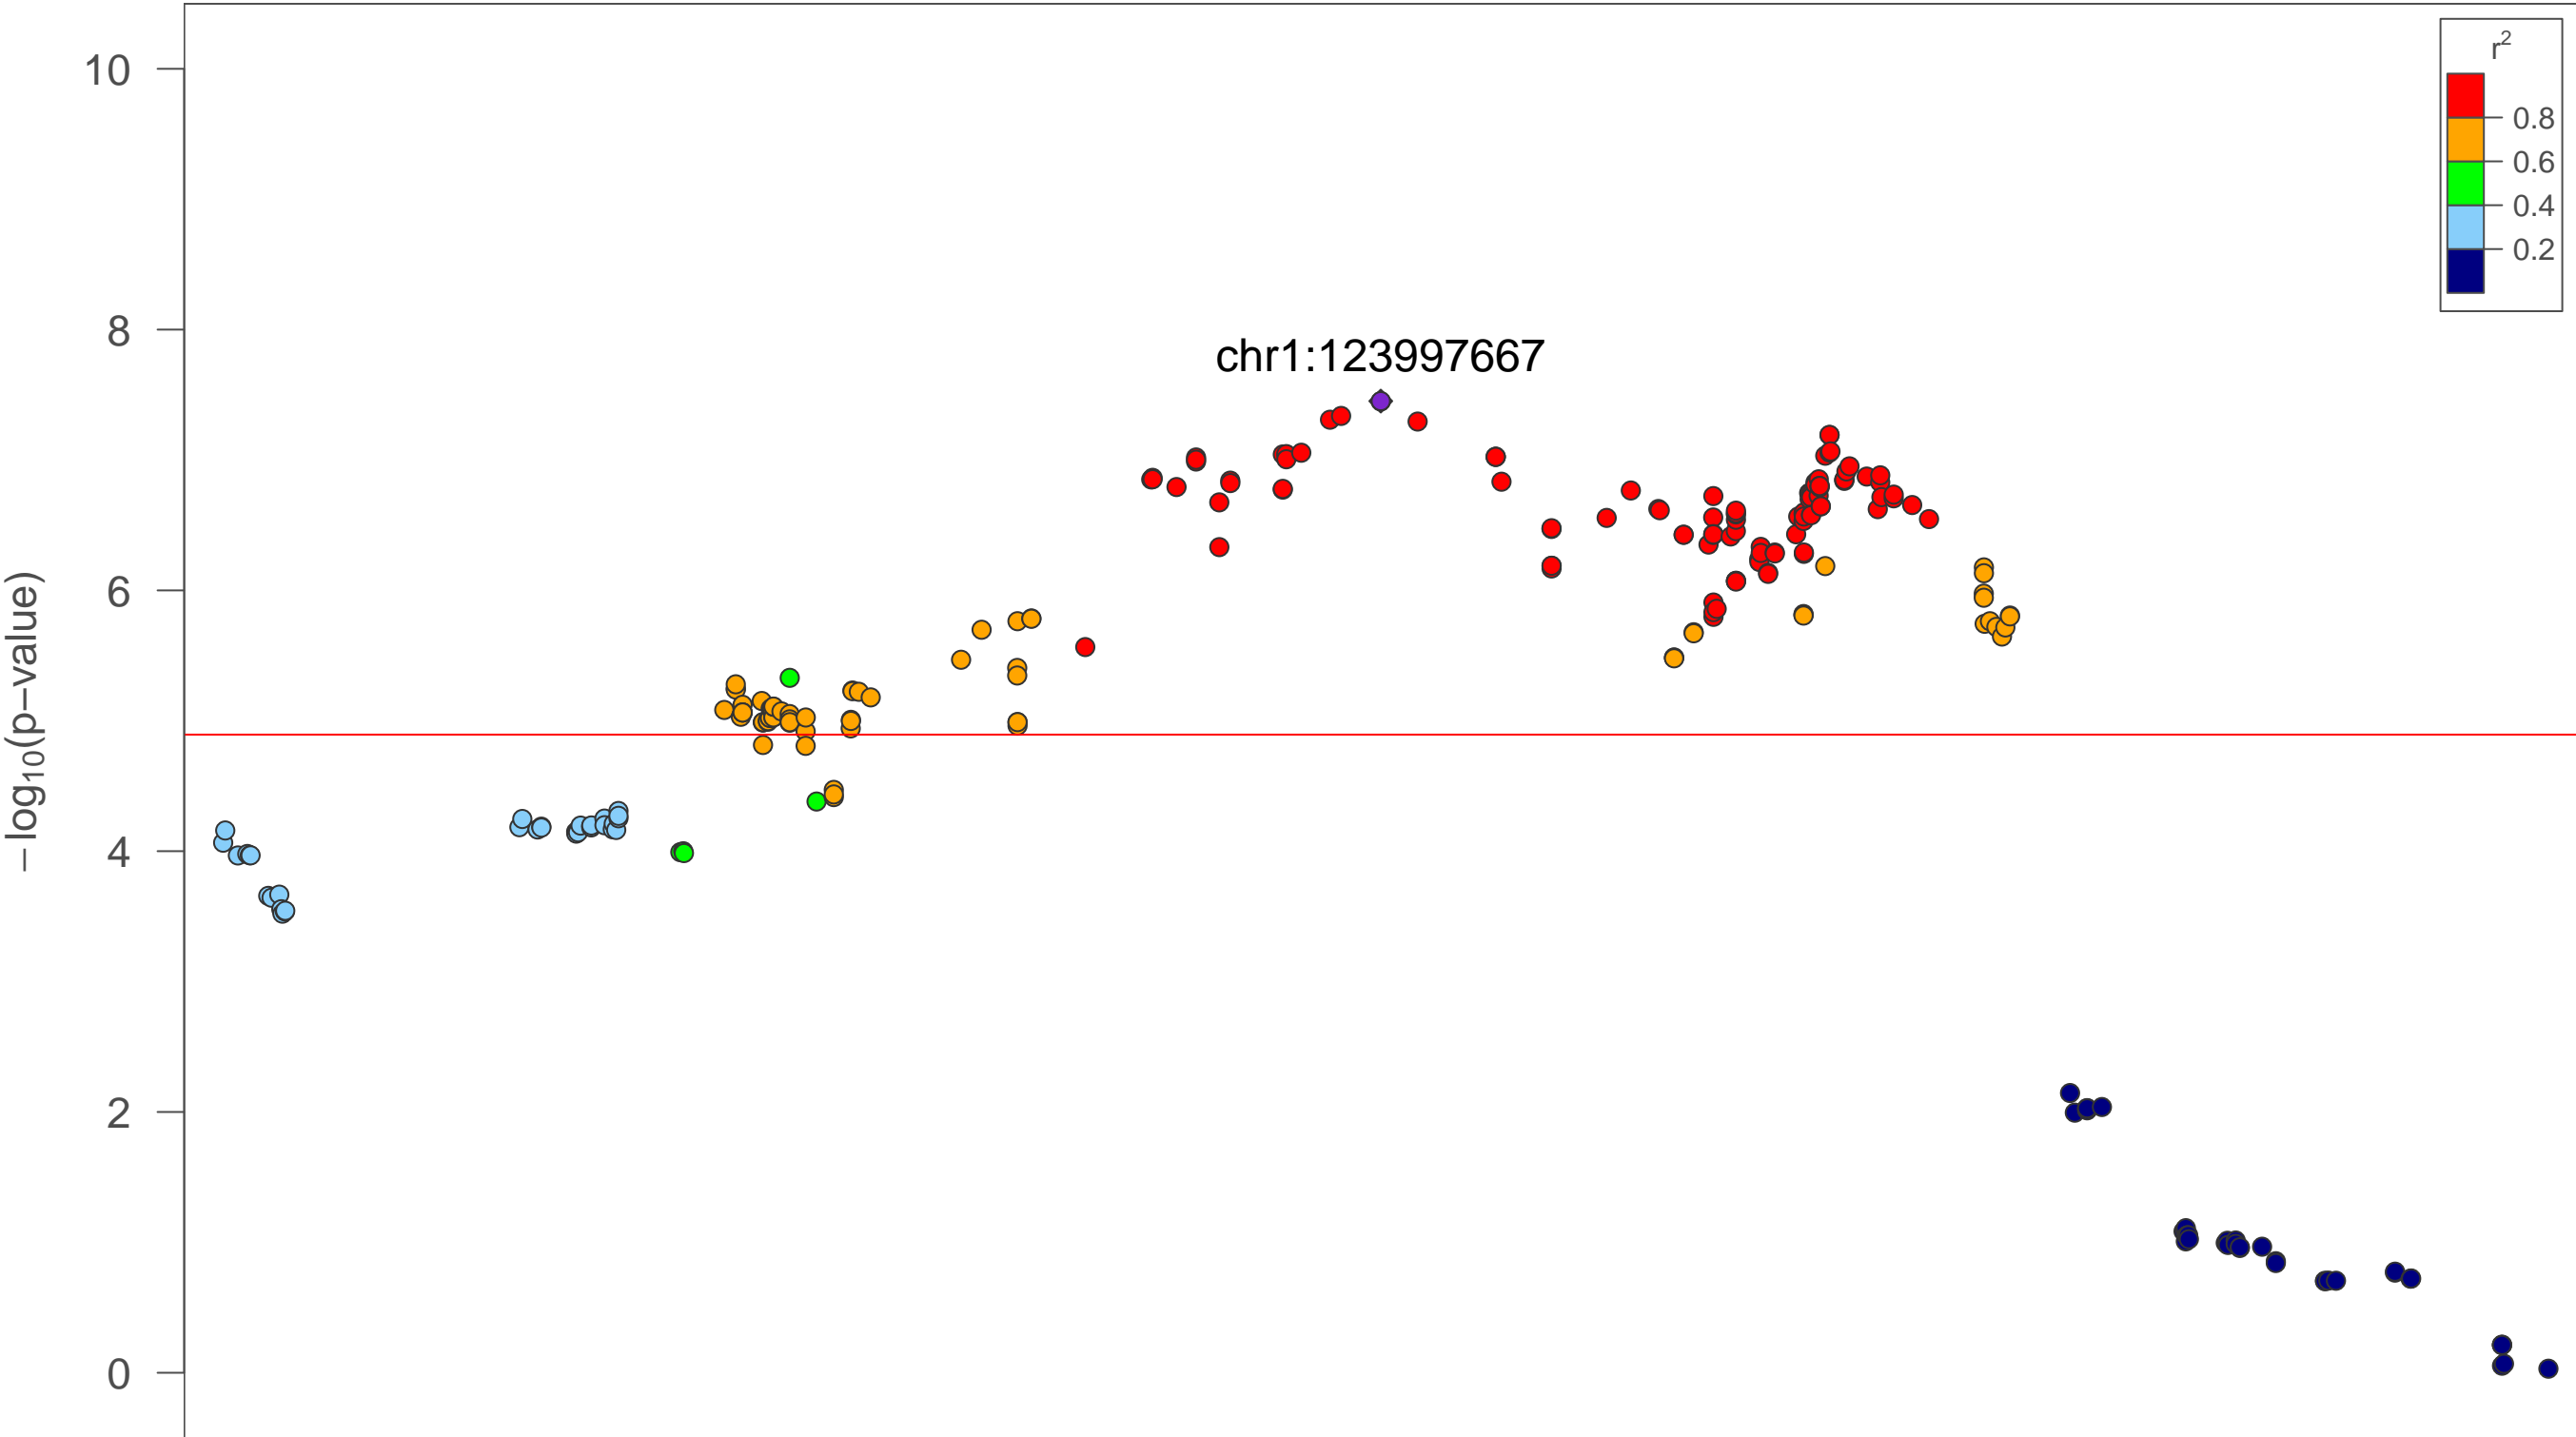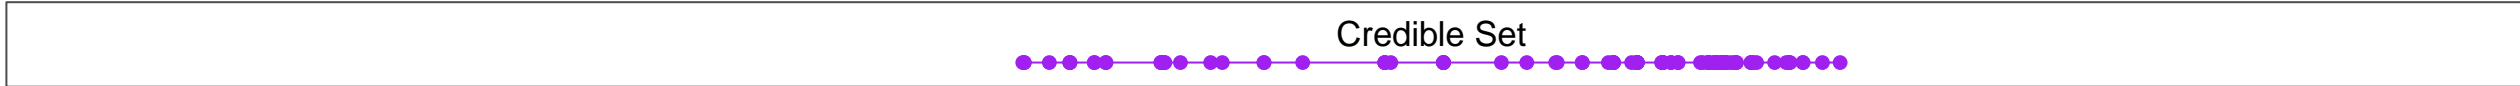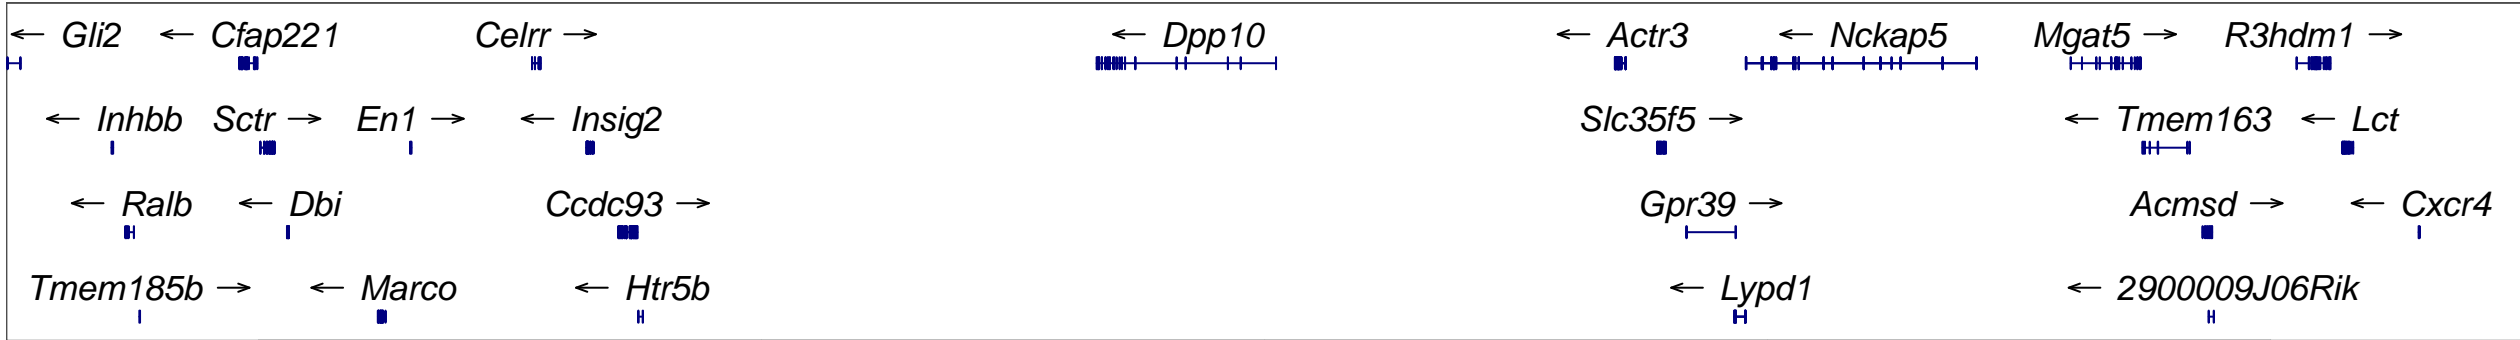

17 genes  
omitted

date: Thu Oct 25 16:59:30 2018

build: F34F3943GBS

display range: chr1:118997667–128997667 [118997667–128997667]

hilite range: 0 – 0 [ 0 – 0 ]

reference SNP: chr1:123997667

number of SNPs plotted: 260

min P-value: 3.53E–8 [chr1:123997667]

max P-value: 9.31E–1 [chr1:128876034]

omitted Genes: 3830432H09Rik, Epb41l5, Ptpn4

omitted Genes: Tmem177, Tmem37, 3110009E18Rik

omitted Genes: Steap3, C1ql2, Ddx18

omitted Genes: Ccnt2, Map3k19, Rab3gap1

omitted Genes: Zranb3, Mir128–1, Ubxn4

omitted Genes: Mcm6, Dars

## Fine-mapping Regions

| snp            | chr | pos (Mb) | pp          | group        | color  |
|----------------|-----|----------|-------------|--------------|--------|
| chr1:123038644 | 1   | 123.0386 | 0.010936661 | Credible Set | purple |
| chr1:123044323 | 1   | 123.0443 | 0.011241536 | Credible Set | purple |
| chr1:123044326 | 1   | 123.0443 | 0.010972144 | Credible Set | purple |
| chr1:123144261 | 1   | 123.1443 | 0.009603843 | Credible Set | purple |
| chr1:123225956 | 1   | 123.2260 | 0.014851880 | Credible Set | purple |
| chr1:123225957 | 1   | 123.2260 | 0.015925704 | Credible Set | purple |
| chr1:123225968 | 1   | 123.2260 | 0.015321794 | Credible Set | purple |
| chr1:123322958 | 1   | 123.3230 | 0.007392939 | Credible Set | purple |
| chr1:123323170 | 1   | 123.3232 | 0.003447493 | Credible Set | purple |
| chr1:123368825 | 1   | 123.3688 | 0.010719158 | Credible Set | purple |
| chr1:123369170 | 1   | 123.3692 | 0.010277294 | Credible Set | purple |
| chr1:123588206 | 1   | 123.5882 | 0.009191190 | Credible Set | purple |
| chr1:123588207 | 1   | 123.5882 | 0.009310789 | Credible Set | purple |
| chr1:123588436 | 1   | 123.5884 | 0.016769146 | Credible Set | purple |
| chr1:123602768 | 1   | 123.6028 | 0.016865161 | Credible Set | purple |
| chr1:123603027 | 1   | 123.6030 | 0.015435306 | Credible Set | purple |
| chr1:123665450 | 1   | 123.6655 | 0.017260549 | Credible Set | purple |
| chr1:123785564 | 1   | 123.7856 | 0.030369351 | Credible Set | purple |
| chr1:123831927 | 1   | 123.8319 | 0.032395972 | Credible Set | purple |
| chr1:123997640 | 1   | 123.9976 | 0.041511594 | Credible Set | purple |
| chr1:123997667 | 1   | 123.9977 | 0.041745092 | Credible Set | purple |
| chr1:124151549 | 1   | 124.1515 | 0.029431303 | Credible Set | purple |
| chr1:124477860 | 1   | 124.4779 | 0.016102671 | Credible Set | purple |
| chr1:124477885 | 1   | 124.4779 | 0.016101238 | Credible Set | purple |
| chr1:124477894 | 1   | 124.4779 | 0.016092643 | Credible Set | purple |
| chr1:124501960 | 1   | 124.5020 | 0.010520156 | Credible Set | purple |
| chr1:124711052 | 1   | 124.7111 | 0.004700363 | Credible Set | purple |
| chr1:124711083 | 1   | 124.7111 | 0.004756787 | Credible Set | purple |
| chr1:124711275 | 1   | 124.7113 | 0.002509492 | Credible Set | purple |
| chr1:124711325 | 1   | 124.7113 | 0.002396614 | Credible Set | purple |
| chr1:124711335 | 1   | 124.7113 | 0.002511671 | Credible Set | purple |
| chr1:124941492 | 1   | 124.9415 | 0.005673875 | Credible Set | purple |
| chr1:125042386 | 1   | 125.0424 | 0.009054356 | Credible Set | purple |
| chr1:125157478 | 1   | 125.1575 | 0.006602808 | Credible Set | purple |
| chr1:125163273 | 1   | 125.1633 | 0.006464504 | Credible Set | purple |
| chr1:125263025 | 1   | 125.2630 | 0.004254125 | Credible Set | purple |



## Fine-mapping Regions

| snp            | chr | pos (Mb) | pp          | group        | color  |
|----------------|-----|----------|-------------|--------------|--------|
| chr1:125263026 | 1   | 125.2630 | 0.004256381 | Credible Set | purple |
| chr1:125367002 | 1   | 125.3670 | 0.003601180 | Credible Set | purple |
| chr1:125386497 | 1   | 125.3865 | 0.005715202 | Credible Set | purple |
| chr1:125387017 | 1   | 125.3870 | 0.004243755 | Credible Set | purple |
| chr1:125387048 | 1   | 125.3870 | 0.004306048 | Credible Set | purple |
| chr1:125387071 | 1   | 125.3871 | 0.004280330 | Credible Set | purple |
| chr1:125387095 | 1   | 125.3871 | 0.008231250 | Credible Set | purple |
| chr1:125459470 | 1   | 125.4595 | 0.004132014 | Credible Set | purple |
| chr1:125481066 | 1   | 125.4811 | 0.004529628 | Credible Set | purple |
| chr1:125481498 | 1   | 125.4815 | 0.005499793 | Credible Set | purple |
| chr1:125481527 | 1   | 125.4815 | 0.006021720 | Credible Set | purple |
| chr1:125481552 | 1   | 125.4816 | 0.006156479 | Credible Set | purple |
| chr1:125481575 | 1   | 125.4816 | 0.006421286 | Credible Set | purple |
| chr1:125481715 | 1   | 125.4817 | 0.001945740 | Credible Set | purple |
| chr1:125578885 | 1   | 125.5789 | 0.002810203 | Credible Set | purple |
| chr1:125579353 | 1   | 125.5794 | 0.002678265 | Credible Set | purple |
| chr1:125585192 | 1   | 125.5852 | 0.003462203 | Credible Set | purple |
| chr1:125585252 | 1   | 125.5853 | 0.003123502 | Credible Set | purple |
| chr1:125615959 | 1   | 125.6160 | 0.002225522 | Credible Set | purple |
| chr1:125616002 | 1   | 125.6160 | 0.002185989 | Credible Set | purple |
| chr1:125643547 | 1   | 125.6435 | 0.003145129 | Credible Set | purple |
| chr1:125643933 | 1   | 125.6439 | 0.003094798 | Credible Set | purple |
| chr1:125733123 | 1   | 125.7331 | 0.004290058 | Credible Set | purple |
| chr1:125741798 | 1   | 125.7418 | 0.005807763 | Credible Set | purple |
| chr1:125764061 | 1   | 125.7641 | 0.005383415 | Credible Set | purple |
| chr1:125764120 | 1   | 125.7641 | 0.006086535 | Credible Set | purple |
| chr1:125765305 | 1   | 125.7653 | 0.003074121 | Credible Set | purple |
| chr1:125765343 | 1   | 125.7653 | 0.003145375 | Credible Set | purple |
| chr1:125765591 | 1   | 125.7656 | 0.006228165 | Credible Set | purple |
| chr1:125765595 | 1   | 125.7656 | 0.005809238 | Credible Set | purple |
| chr1:125787309 | 1   | 125.7873 | 0.008676441 | Credible Set | purple |
| chr1:125789544 | 1   | 125.7895 | 0.007793146 | Credible Set | purple |
| chr1:125789598 | 1   | 125.7896 | 0.008563652 | Credible Set | purple |
| chr1:125795230 | 1   | 125.7952 | 0.008392435 | Credible Set | purple |
| chr1:125795318 | 1   | 125.7953 | 0.008060562 | Credible Set | purple |
| chr1:125795437 | 1   | 125.7954 | 0.005990406 | Credible Set | purple |

## Fine-mapping Regions

| snp            | chr | pos (Mb) | pp          | group        | color  |
|----------------|-----|----------|-------------|--------------|--------|
| chr1:125795438 | 1   | 125.7954 | 0.005939926 | Credible Set | purple |
| chr1:125813871 | 1   | 125.8139 | 0.010397190 | Credible Set | purple |
| chr1:125813926 | 1   | 125.8139 | 0.009986284 | Credible Set | purple |
| chr1:125826985 | 1   | 125.8270 | 0.008293128 | Credible Set | purple |
| chr1:125827492 | 1   | 125.8275 | 0.010969665 | Credible Set | purple |
| chr1:125831250 | 1   | 125.8312 | 0.009798995 | Credible Set | purple |
| chr1:125831282 | 1   | 125.8313 | 0.009572848 | Credible Set | purple |
| chr1:125831293 | 1   | 125.8313 | 0.009775255 | Credible Set | purple |
| chr1:125836037 | 1   | 125.8360 | 0.006905259 | Credible Set | purple |
| chr1:125836053 | 1   | 125.8361 | 0.006916447 | Credible Set | purple |
| chr1:125854689 | 1   | 125.8547 | 0.016398789 | Credible Set | purple |
| chr1:125872500 | 1   | 125.8725 | 0.023362569 | Credible Set | purple |
| chr1:125872503 | 1   | 125.8725 | 0.023427212 | Credible Set | purple |
| chr1:125872524 | 1   | 125.8725 | 0.017306554 | Credible Set | purple |
| chr1:125876478 | 1   | 125.8765 | 0.017652913 | Credible Set | purple |
| chr1:125934259 | 1   | 125.9343 | 0.010673487 | Credible Set | purple |
| chr1:125934293 | 1   | 125.9343 | 0.010925334 | Credible Set | purple |
| chr1:125934498 | 1   | 125.9345 | 0.010853985 | Credible Set | purple |
| chr1:125943250 | 1   | 125.9433 | 0.012547516 | Credible Set | purple |
| chr1:125956049 | 1   | 125.9560 | 0.013682406 | Credible Set | purple |
| chr1:126027899 | 1   | 126.0279 | 0.011486449 | Credible Set | purple |
| chr1:126074088 | 1   | 126.0741 | 0.006583365 | Credible Set | purple |
| chr1:126084400 | 1   | 126.0844 | 0.010413670 | Credible Set | purple |
| chr1:126084494 | 1   | 126.0845 | 0.011737507 | Credible Set | purple |
| chr1:126089361 | 1   | 126.0894 | 0.008088780 | Credible Set | purple |
| chr1:126140625 | 1   | 126.1406 | 0.007920435 | Credible Set | purple |
| chr1:126140679 | 1   | 126.1407 | 0.008443348 | Credible Set | purple |
| chr1:126217882 | 1   | 126.2179 | 0.007065695 | Credible Set | purple |
| chr1:126288256 | 1   | 126.2883 | 0.005558527 | Credible Set | purple |

# F34 GBS, body weight day 1

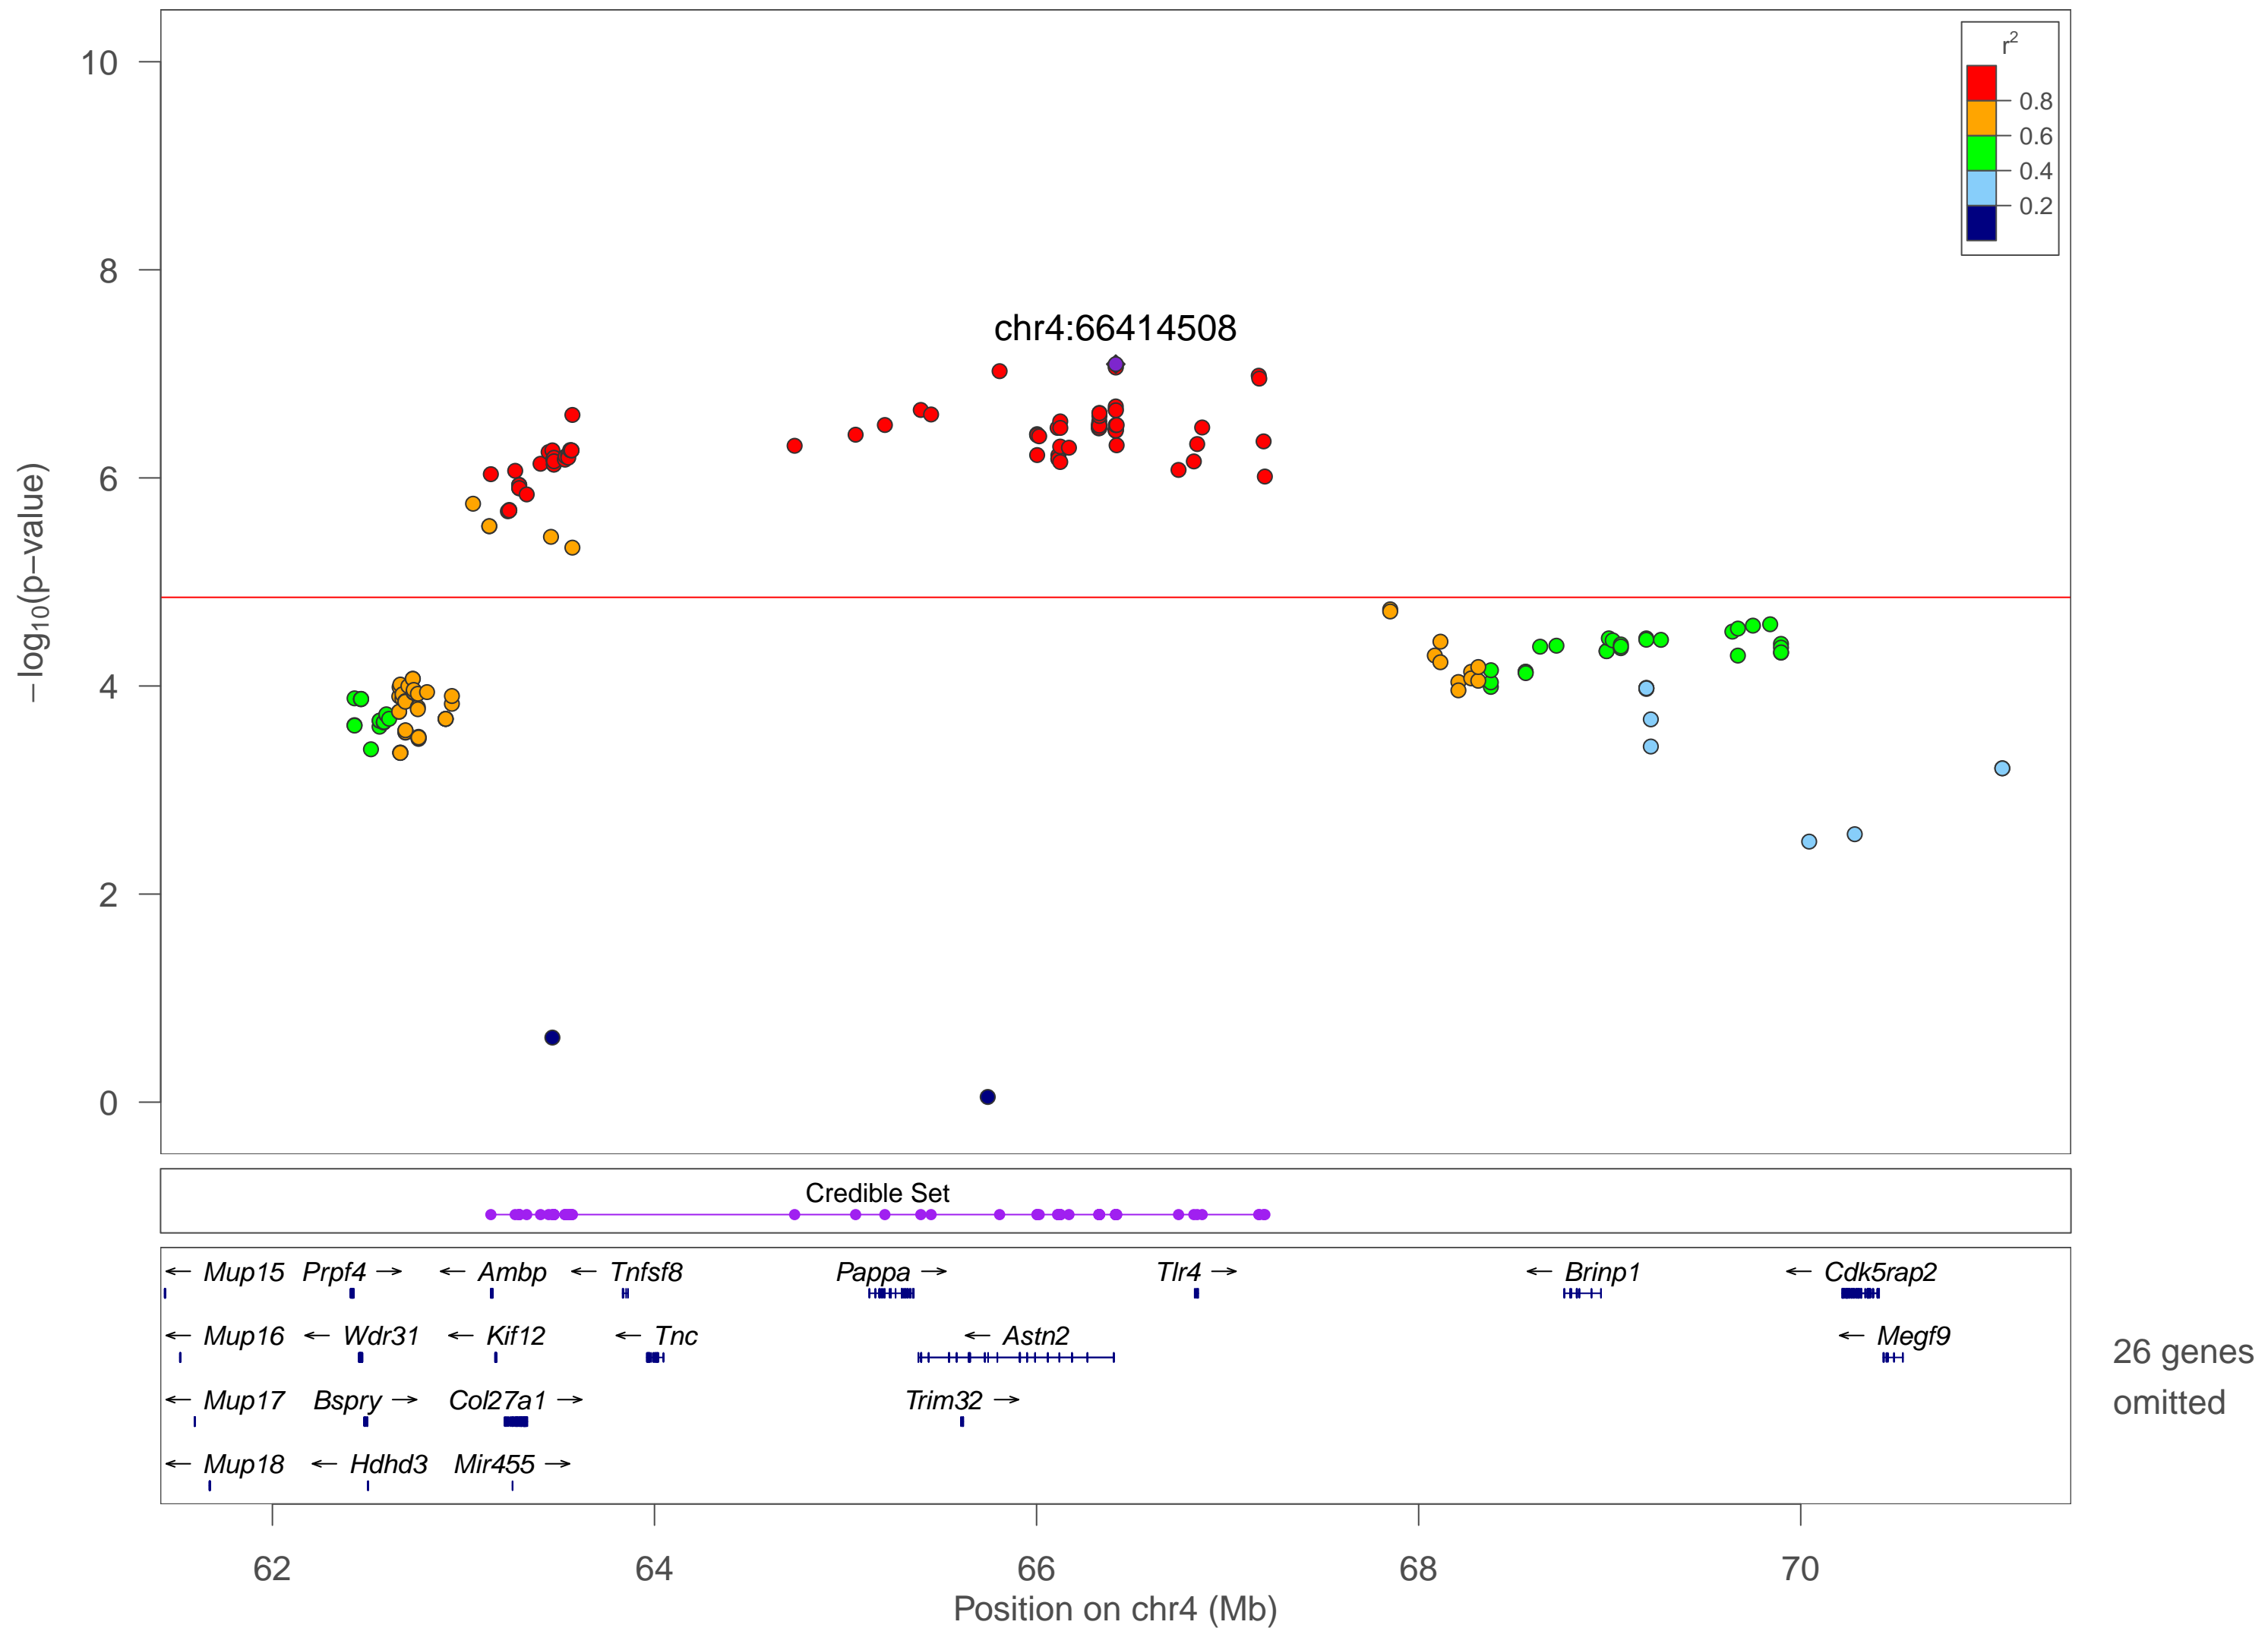

date: Thu Oct 25 16:59:56 2018

build: F34GBS

display range: chr4:61414508–71414508 [61414508–71414508]

hilite range: 0 – 0 [ 0 – 0 ]

reference SNP: chr4:66414508

number of SNPs plotted: 191

min P-value: 8.06E–8 [chr4:66414508]

max P-value: 8.91E–1 [chr4:65744347]

omitted Genes: Mup19, Mup5, Mup20

omitted Genes: Mup3, Mup21, Zfp37

omitted Genes: Slc31a2, Fkbp15, Slc31a1

omitted Genes: Cdc26, Rnf183, Alad

omitted Genes: Pole3, 4933430I17Rik, Rgs3

omitted Genes: Zfp618, Orm1, Orm3

omitted Genes: Orm2, Akna, Whrn

omitted Genes: Atp6v1g1, 6330416G13Rik, Gm11213

omitted Genes: 1700018C11Rik, Tnfsf15

## Fine-mapping Regions

| snp           | chr | pos (Mb) | pp          | group        | color  |
|---------------|-----|----------|-------------|--------------|--------|
| chr4:63143387 | 4   | 63.14339 | 0.004920532 | Credible Set | purple |
| chr4:63270812 | 4   | 63.27081 | 0.005286562 | Credible Set | purple |
| chr4:63291699 | 4   | 63.29170 | 0.003919544 | Credible Set | purple |
| chr4:63291735 | 4   | 63.29174 | 0.003895518 | Credible Set | purple |
| chr4:63292002 | 4   | 63.29200 | 0.003641439 | Credible Set | purple |
| chr4:63292021 | 4   | 63.29202 | 0.003657412 | Credible Set | purple |
| chr4:63331035 | 4   | 63.33103 | 0.003198973 | Credible Set | purple |
| chr4:63403594 | 4   | 63.40359 | 0.006146430 | Credible Set | purple |
| chr4:63445899 | 4   | 63.44590 | 0.007880930 | Credible Set | purple |
| chr4:63465528 | 4   | 63.46553 | 0.008176243 | Credible Set | purple |
| chr4:63471028 | 4   | 63.47103 | 0.006807494 | Credible Set | purple |
| chr4:63471086 | 4   | 63.47109 | 0.006701406 | Credible Set | purple |
| chr4:63473150 | 4   | 63.47315 | 0.006064724 | Credible Set | purple |
| chr4:63473181 | 4   | 63.47318 | 0.006026442 | Credible Set | purple |
| chr4:63473231 | 4   | 63.47323 | 0.006770501 | Credible Set | purple |
| chr4:63473937 | 4   | 63.47394 | 0.006987638 | Credible Set | purple |
| chr4:63474009 | 4   | 63.47401 | 0.006476940 | Credible Set | purple |
| chr4:63531405 | 4   | 63.53140 | 0.006799207 | Credible Set | purple |
| chr4:63531436 | 4   | 63.53144 | 0.006706997 | Credible Set | purple |
| chr4:63535096 | 4   | 63.53510 | 0.007191464 | Credible Set | purple |
| chr4:63548238 | 4   | 63.54824 | 0.007458420 | Credible Set | purple |
| chr4:63548572 | 4   | 63.54857 | 0.007001992 | Credible Set | purple |
| chr4:63558825 | 4   | 63.55882 | 0.008222442 | Credible Set | purple |
| chr4:63565618 | 4   | 63.56562 | 0.008176243 | Credible Set | purple |
| chr4:63565712 | 4   | 63.56571 | 0.008176243 | Credible Set | purple |
| chr4:63570198 | 4   | 63.57020 | 0.017426428 | Credible Set | purple |
| chr4:64733521 | 4   | 64.73352 | 0.009019328 | Credible Set | purple |
| chr4:65052703 | 4   | 65.05270 | 0.011424417 | Credible Set | purple |
| chr4:65205920 | 4   | 65.20592 | 0.014056399 | Credible Set | purple |
| chr4:65393970 | 4   | 65.39397 | 0.019387756 | Credible Set | purple |
| chr4:65447841 | 4   | 65.44784 | 0.017604254 | Credible Set | purple |
| chr4:65806420 | 4   | 65.80642 | 0.044483904 | Credible Set | purple |
| chr4:66002530 | 4   | 66.00253 | 0.011555098 | Credible Set | purple |
| chr4:66003029 | 4   | 66.00303 | 0.007394839 | Credible Set | purple |
| chr4:66003164 | 4   | 66.00316 | 0.011297129 | Credible Set | purple |
| chr4:66013512 | 4   | 66.01351 | 0.011044254 | Credible Set | purple |

## Fine-mapping Regions

| snp           | chr | pos (Mb) | pp          | group        | color  |
|---------------|-----|----------|-------------|--------------|--------|
| chr4:66110072 | 4   | 66.11007 | 0.013212622 | Credible Set | purple |
| chr4:66114163 | 4   | 66.11416 | 0.007359190 | Credible Set | purple |
| chr4:66114164 | 4   | 66.11416 | 0.006808908 | Credible Set | purple |
| chr4:66114176 | 4   | 66.11418 | 0.006844079 | Credible Set | purple |
| chr4:66123765 | 4   | 66.12377 | 0.008867952 | Credible Set | purple |
| chr4:66123768 | 4   | 66.12377 | 0.006380854 | Credible Set | purple |
| chr4:66123832 | 4   | 66.12383 | 0.015171792 | Credible Set | purple |
| chr4:66124242 | 4   | 66.12424 | 0.013213448 | Credible Set | purple |
| chr4:66169378 | 4   | 66.16938 | 0.008650737 | Credible Set | purple |
| chr4:66325857 | 4   | 66.32586 | 0.014138122 | Credible Set | purple |
| chr4:66325987 | 4   | 66.32599 | 0.013078820 | Credible Set | purple |
| chr4:66328189 | 4   | 66.32819 | 0.013209608 | Credible Set | purple |
| chr4:66328195 | 4   | 66.32819 | 0.013217499 | Credible Set | purple |
| chr4:66328436 | 4   | 66.32844 | 0.013823825 | Credible Set | purple |
| chr4:66328528 | 4   | 66.32853 | 0.015206020 | Credible Set | purple |
| chr4:66328560 | 4   | 66.32856 | 0.013843567 | Credible Set | purple |
| chr4:66329044 | 4   | 66.32904 | 0.017044709 | Credible Set | purple |
| chr4:66329065 | 4   | 66.32906 | 0.018199854 | Credible Set | purple |
| chr4:66329095 | 4   | 66.32909 | 0.018061779 | Credible Set | purple |
| chr4:66414332 | 4   | 66.41433 | 0.012736841 | Credible Set | purple |
| chr4:66414345 | 4   | 66.41434 | 0.012978584 | Credible Set | purple |
| chr4:66414373 | 4   | 66.41437 | 0.012452192 | Credible Set | purple |
| chr4:66414374 | 4   | 66.41437 | 0.012460381 | Credible Set | purple |
| chr4:66414384 | 4   | 66.41438 | 0.014019326 | Credible Set | purple |
| chr4:66414387 | 4   | 66.41439 | 0.019585308 | Credible Set | purple |
| chr4:66414451 | 4   | 66.41445 | 0.020897239 | Credible Set | purple |
| chr4:66414476 | 4   | 66.41448 | 0.048901218 | Credible Set | purple |
| chr4:66414508 | 4   | 66.41451 | 0.051683313 | Credible Set | purple |
| chr4:66414513 | 4   | 66.41451 | 0.048088101 | Credible Set | purple |
| chr4:66414963 | 4   | 66.41496 | 0.019242291 | Credible Set | purple |
| chr4:66419064 | 4   | 66.41906 | 0.009116121 | Credible Set | purple |
| chr4:66419126 | 4   | 66.41913 | 0.014049268 | Credible Set | purple |
| chr4:66743103 | 4   | 66.74310 | 0.005389529 | Credible Set | purple |
| chr4:66823255 | 4   | 66.82326 | 0.006460812 | Credible Set | purple |
| chr4:66840696 | 4   | 66.84070 | 0.009357500 | Credible Set | purple |
| chr4:66866758 | 4   | 66.86676 | 0.013333133 | Credible Set | purple |

Fine-mapping Regions

| snp           | chr | pos (Mb) | pp          | group        | color  |
|---------------|-----|----------|-------------|--------------|--------|
| chr4:67163007 | 4   | 67.16301 | 0.040364868 | Credible Set | purple |
| chr4:67165680 | 4   | 67.16568 | 0.037908162 | Credible Set | purple |
| chr4:67188375 | 4   | 67.18837 | 0.009903913 | Credible Set | purple |
| chr4:67194875 | 4   | 67.19487 | 0.004679250 | Credible Set | purple |

# F34 GBS, body weight day 1

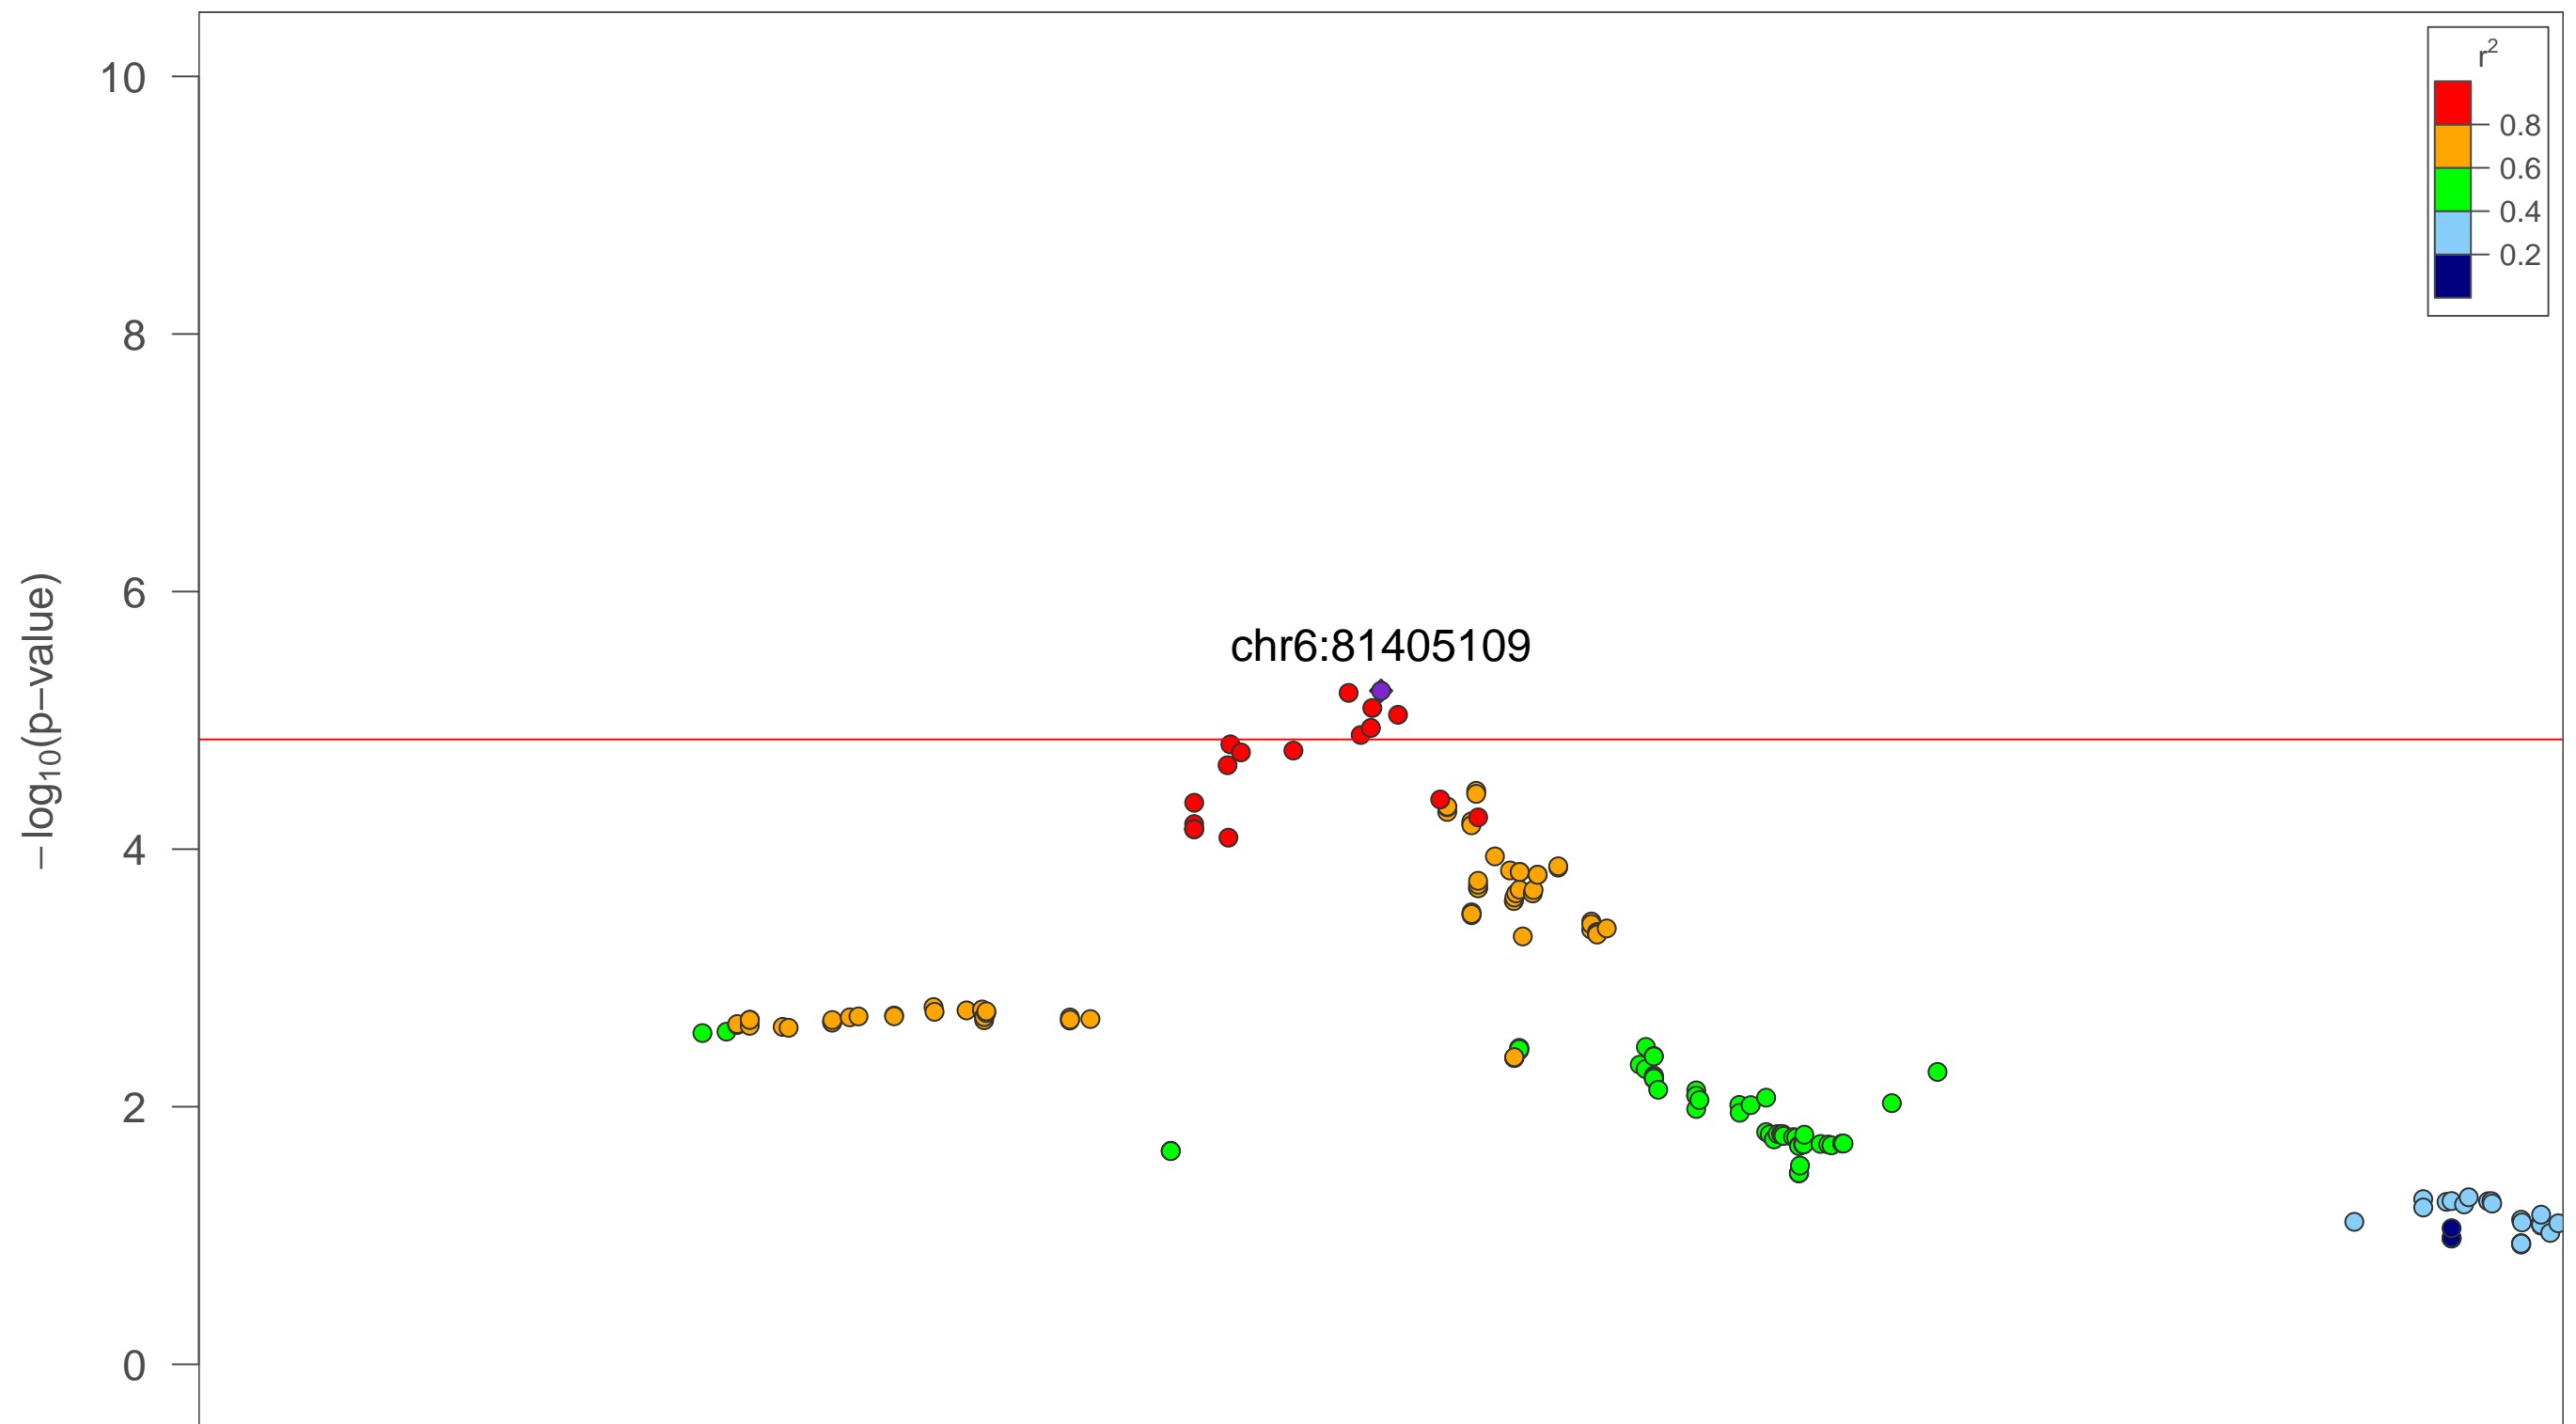

Credible Set

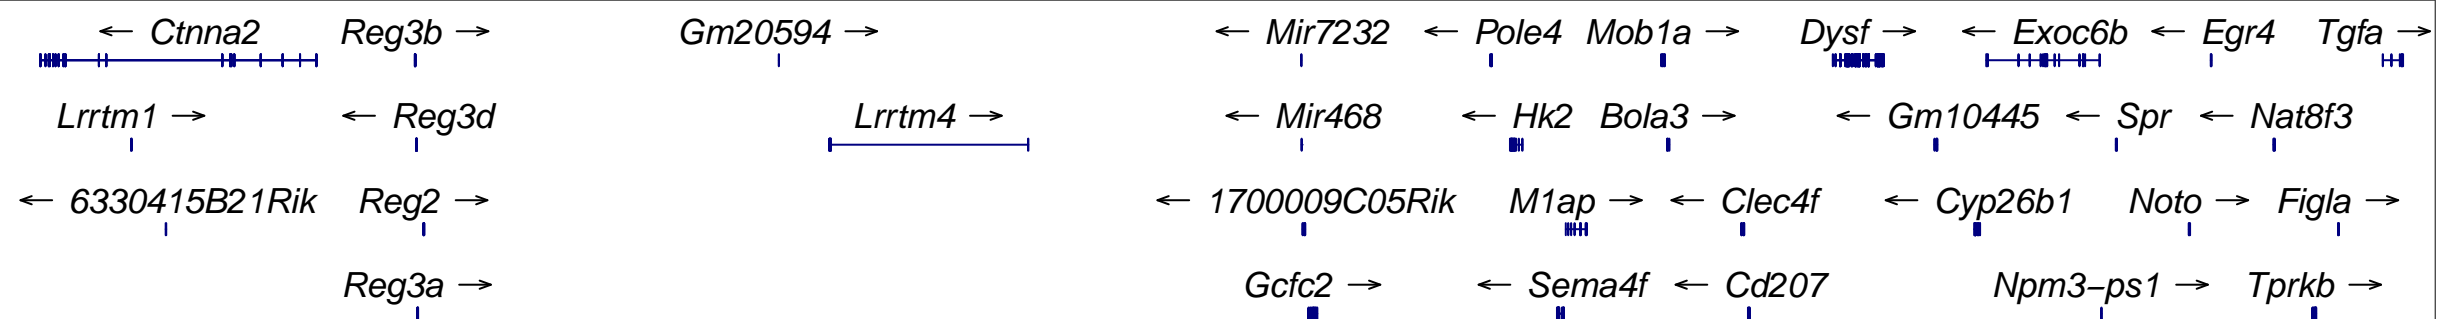

70 genes  
omitted

78

80

82

84

86

Position on chr6 (Mb)



date: Thu Oct 25 17:00:07 2018  
build: F34GBS  
display range: chr6:76405109–86405109 [76405109–86405109]  
hilite range: 0 – 0 [ 0 – 0 ]  
reference SNP: chr6:81405109  
number of SNPs plotted: 172  
min P-value: 5.89E–6 [chr6:81405109]  
max P-value: 1.17E–1 [chr6:86226324]  
omitted Genes: Reg1, Reg3g, Gm20362  
omitted Genes: Mrpl19, Eva1a, Tacr1  
omitted Genes: 2310069B03Rik, Dok1, Loxl3  
omitted Genes: Mir7040, Htra2, Aup1  
omitted Genes: Dqx1, Tlx2, Pcgf1  
omitted Genes: Lbx2, Mir3470a, Ccdc142  
omitted Genes: Mrpl53, Mogs, Wbp1  
omitted Genes: Ino80b, Rtkn, Wdr54  
omitted Genes: 1700003E16Rik, Dctn1, Slc4a5  
omitted Genes: Mthfd2, Tet3, Mir6374  
omitted Genes: B230319C09Rik, Dguok, Actg2  
omitted Genes: Stambp, Gm21284, Vax2os  
omitted Genes: Vax2, Atp6v1b1, 1700124L16Rik  
omitted Genes: Ankrd53, Tex261, Gm7443  
omitted Genes: Nagk, Paip2b, Zfp638  
omitted Genes: Gm5878, Emx1, Sfxn5  
omitted Genes: Rab11fip5, Mir705, Smyd5  
omitted Genes: Pradc1, Cct7, Fbxo41  
omitted Genes: Alms1, Nat8f7, Mir6375  
omitted Genes: Alms1-ps2, Nat8f6, Nat8f5  
omitted Genes: Nat8, Nat8f2, Nat8f4  
omitted Genes: Nat8f1, Dusp11, Add2  
omitted Genes: Fam136a, Snrpg, Pcyox1  
omitted Genes: Tia1

Fine-mapping Regions

| snp           | chr | pos (Mb) | pp         | group        | color  |
|---------------|-----|----------|------------|--------------|--------|
| chr6:80614710 | 6   | 80.61471 | 0.01554354 | Credible Set | purple |
| chr6:80614725 | 6   | 80.61473 | 0.01423141 | Credible Set | purple |
| chr6:80614740 | 6   | 80.61474 | 0.01429243 | Credible Set | purple |
| chr6:80614750 | 6   | 80.61475 | 0.01423141 | Credible Set | purple |
| chr6:80614907 | 6   | 80.61491 | 0.02227719 | Credible Set | purple |
| chr6:80755939 | 6   | 80.75594 | 0.04218344 | Credible Set | purple |
| chr6:80759589 | 6   | 80.75959 | 0.01234583 | Credible Set | purple |
| chr6:80767933 | 6   | 80.76793 | 0.06018603 | Credible Set | purple |
| chr6:80812582 | 6   | 80.81258 | 0.05245386 | Credible Set | purple |
| chr6:81034488 | 6   | 81.03449 | 0.05411055 | Credible Set | purple |
| chr6:81267890 | 6   | 81.26789 | 0.14493198 | Credible Set | purple |
| chr6:81318989 | 6   | 81.31899 | 0.07060812 | Credible Set | purple |
| chr6:81362217 | 6   | 81.36222 | 0.07964570 | Credible Set | purple |
| chr6:81368112 | 6   | 81.36811 | 0.11190384 | Credible Set | purple |
| chr6:81405109 | 6   | 81.40511 | 0.15035759 | Credible Set | purple |
| chr6:81476902 | 6   | 81.47690 | 0.09971273 | Credible Set | purple |
| chr6:81655195 | 6   | 81.65520 | 0.02357117 | Credible Set | purple |
| chr6:81815817 | 6   | 81.81582 | 0.01741315 | Credible Set | purple |

# F34 GBS, body weight day 1

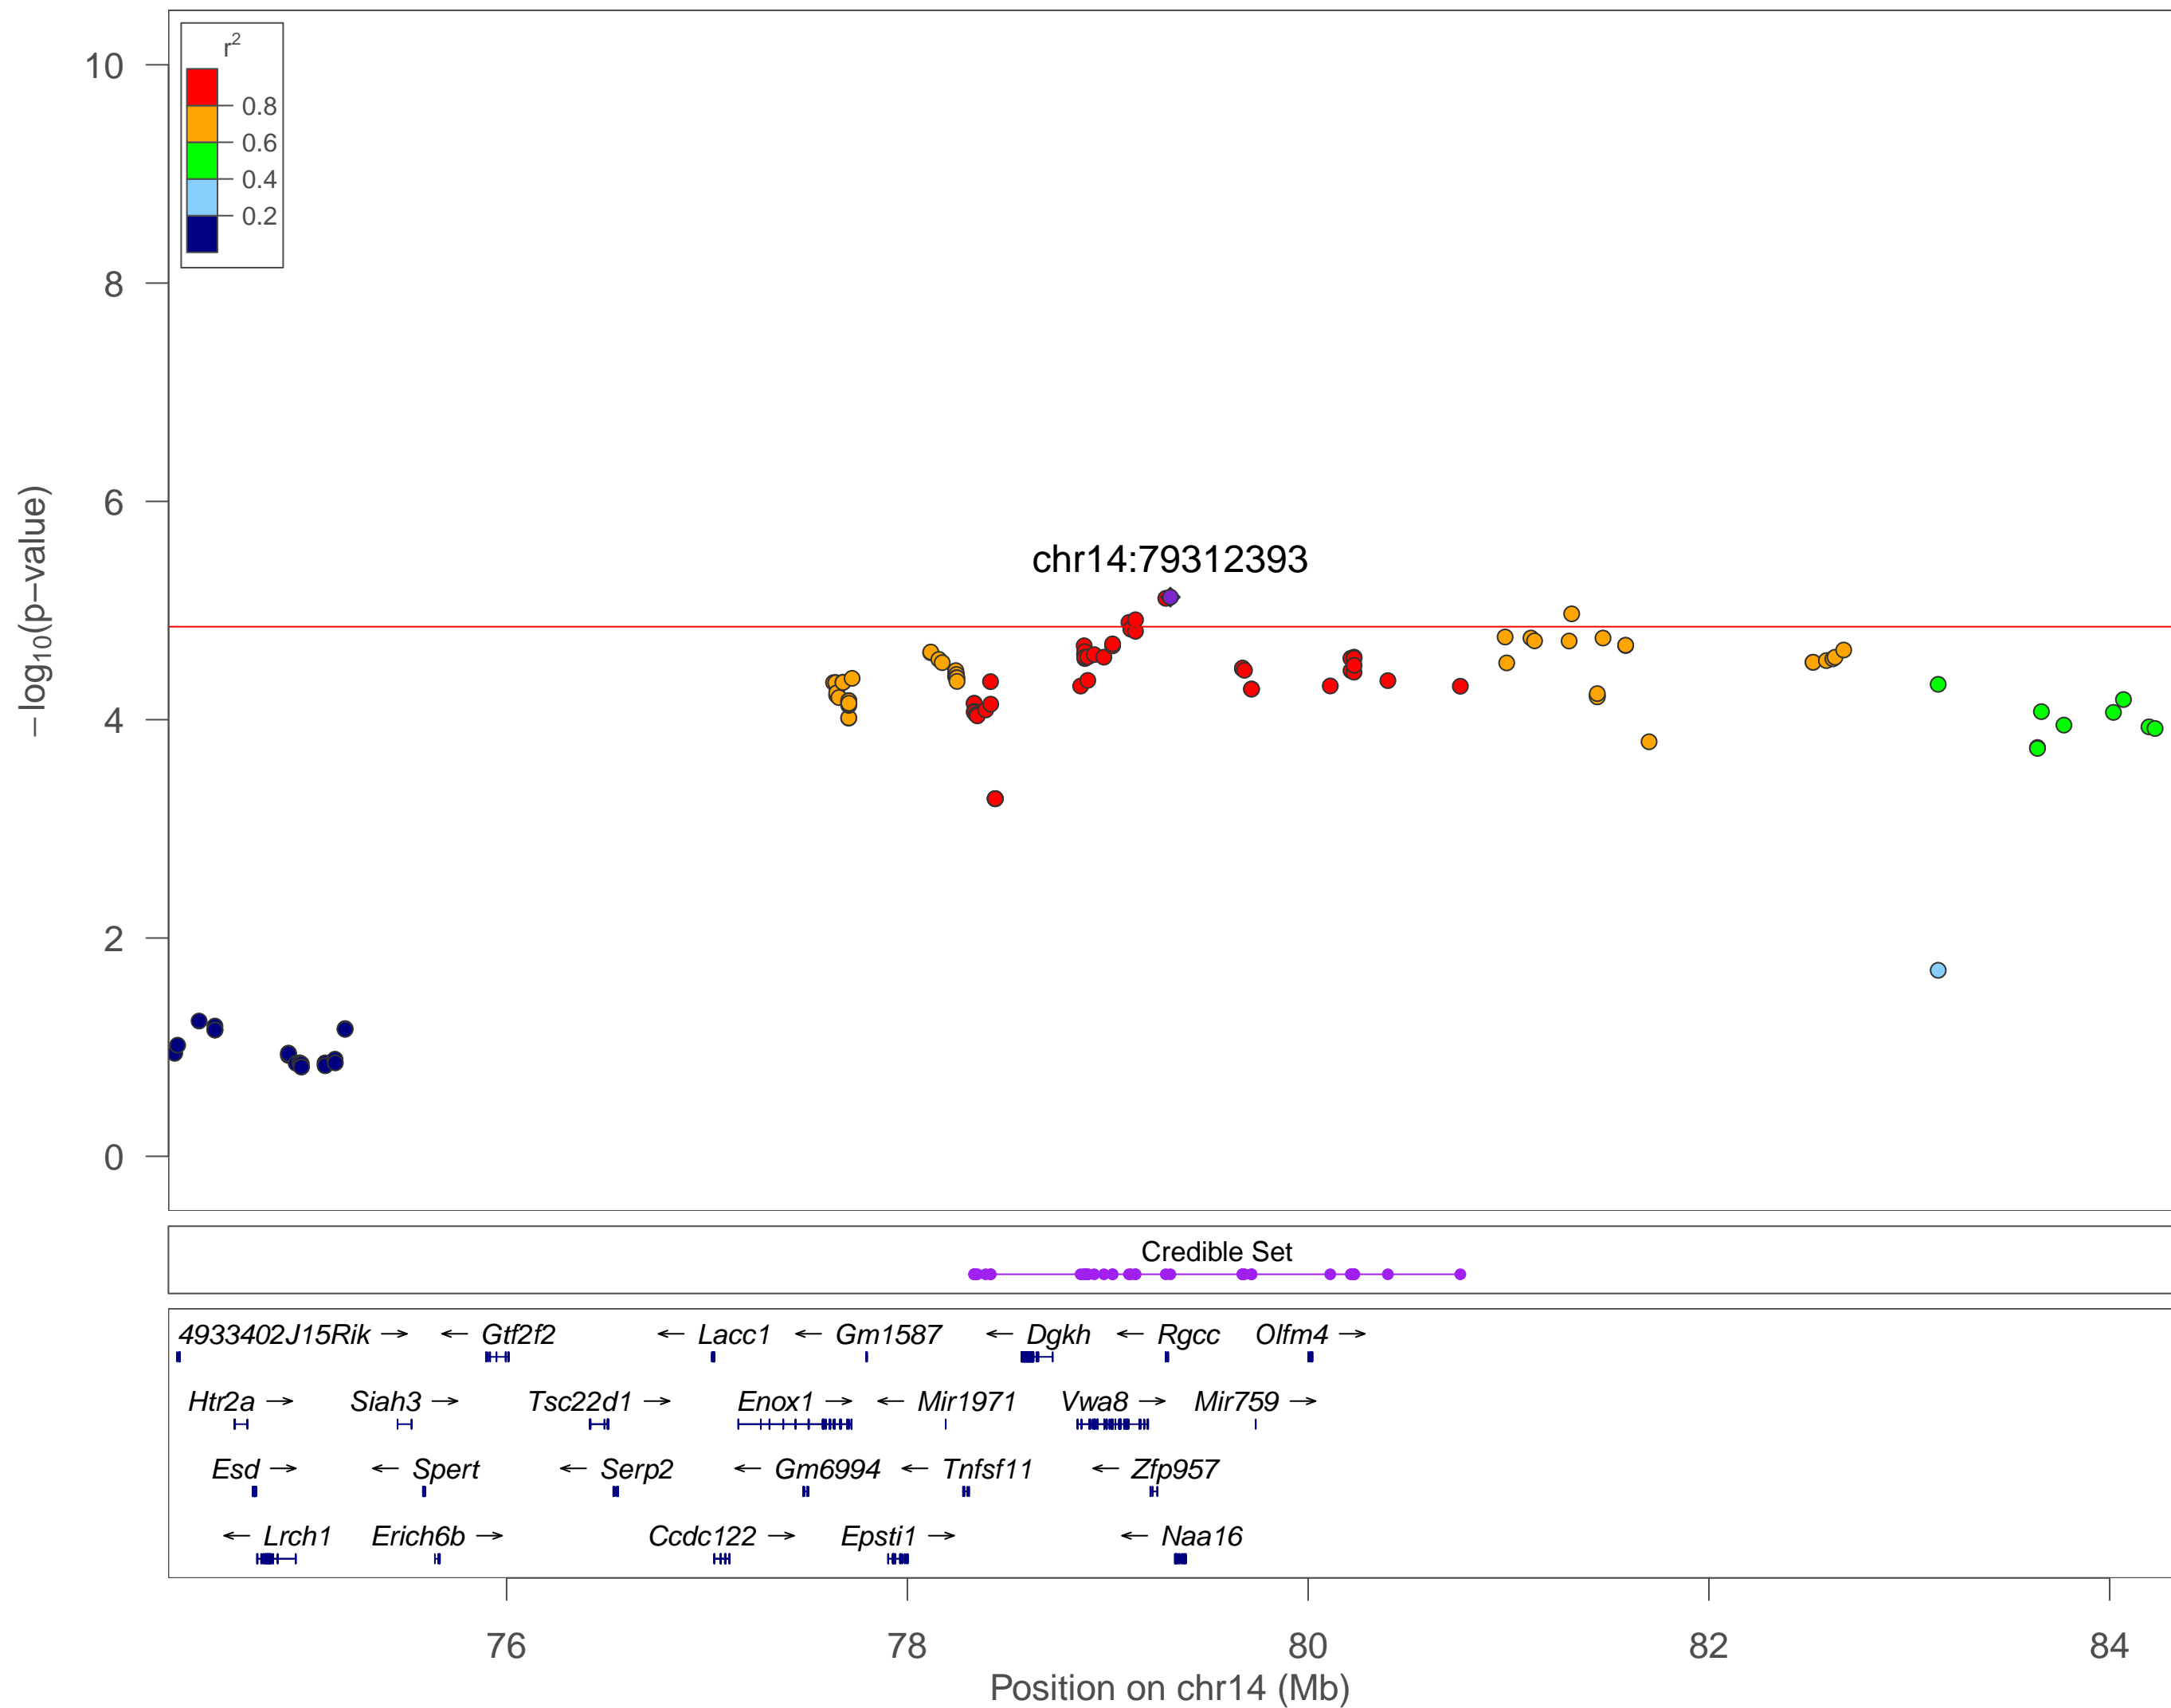

date: Thu Oct 25 16:59:47 2018  
build: F34GBS  
display range: chr14:74312393–84312393 [74312393–84312393]  
hilite range: 0 – 0 [ 0 – 0 ]  
reference SNP: chr14:79312393  
number of SNPs plotted: 127  
min P-value: 7.53E–6 [chr14:79312393]  
max P-value: 1.52E–1 [chr14:74975984]  
omitted Genes: Gm4278, 5031414D18Rik, Lrrc63  
omitted Genes: Lcp1, Cpb2, Zc3h13  
omitted Genes: Cog3, Slc25a30, Gm4285  
omitted Genes: Tpt1, Snora31, Kctd4  
omitted Genes: Gpalpp1, Nufip1, 4930444M15Rik  
omitted Genes: 1700108F19Rik, Dnajc15, Fam216b  
omitted Genes: Akap11, Mtrf1, Kbtbd7  
omitted Genes: Kbtbd6, Wbp4, Elf1  
omitted Genes: Sugt1, Lect1, 4930452G13Rik  
omitted Genes: Pcdh8, Gm10845

## Fine-mapping Regions

| snp            | chr | pos (Mb) | pp          | group        | color  |
|----------------|-----|----------|-------------|--------------|--------|
| chr14:78333693 | 14  | 78.33369 | 0.009596012 | Credible Set | purple |
| chr14:78333727 | 14  | 78.33373 | 0.009605429 | Credible Set | purple |
| chr14:78334235 | 14  | 78.33424 | 0.008176264 | Credible Set | purple |
| chr14:78334352 | 14  | 78.33435 | 0.008002390 | Credible Set | purple |
| chr14:78342935 | 14  | 78.34293 | 0.007662936 | Credible Set | purple |
| chr14:78349294 | 14  | 78.34929 | 0.007479411 | Credible Set | purple |
| chr14:78390714 | 14  | 78.39071 | 0.008413361 | Credible Set | purple |
| chr14:78415035 | 14  | 78.41504 | 0.014815595 | Credible Set | purple |
| chr14:78415900 | 14  | 78.41590 | 0.009447704 | Credible Set | purple |
| chr14:78864748 | 14  | 78.86475 | 0.013558704 | Credible Set | purple |
| chr14:78882395 | 14  | 78.88240 | 0.030401999 | Credible Set | purple |
| chr14:78884278 | 14  | 78.88428 | 0.025644109 | Credible Set | purple |
| chr14:78885403 | 14  | 78.88540 | 0.023519885 | Credible Set | purple |
| chr14:78885542 | 14  | 78.88554 | 0.027055887 | Credible Set | purple |
| chr14:78885909 | 14  | 78.88591 | 0.024172435 | Credible Set | purple |
| chr14:78900265 | 14  | 78.90027 | 0.015186616 | Credible Set | purple |
| chr14:78900272 | 14  | 78.90027 | 0.024273387 | Credible Set | purple |
| chr14:78932384 | 14  | 78.93238 | 0.025452236 | Credible Set | purple |
| chr14:78980736 | 14  | 78.98074 | 0.024189889 | Credible Set | purple |
| chr14:79024151 | 14  | 79.02415 | 0.030356851 | Credible Set | purple |
| chr14:79024207 | 14  | 79.02421 | 0.031572210 | Credible Set | purple |
| chr14:79105928 | 14  | 79.10593 | 0.048647173 | Credible Set | purple |
| chr14:79115207 | 14  | 79.11521 | 0.042428195 | Credible Set | purple |
| chr14:79138261 | 14  | 79.13826 | 0.040676940 | Credible Set | purple |
| chr14:79138486 | 14  | 79.13849 | 0.051279397 | Credible Set | purple |
| chr14:79289663 | 14  | 79.28966 | 0.078969096 | Credible Set | purple |
| chr14:79312393 | 14  | 79.31239 | 0.080912275 | Credible Set | purple |
| chr14:79672373 | 14  | 79.67237 | 0.019294935 | Credible Set | purple |
| chr14:79672387 | 14  | 79.67239 | 0.019192702 | Credible Set | purple |
| chr14:79672589 | 14  | 79.67259 | 0.019449424 | Credible Set | purple |
| chr14:79682220 | 14  | 79.68222 | 0.018595042 | Credible Set | purple |
| chr14:79717330 | 14  | 79.71733 | 0.012796695 | Credible Set | purple |
| chr14:79717420 | 14  | 79.71742 | 0.012748553 | Credible Set | purple |
| chr14:80110393 | 14  | 80.11039 | 0.013594815 | Credible Set | purple |
| chr14:80213369 | 14  | 80.21337 | 0.023644892 | Credible Set | purple |
| chr14:80214058 | 14  | 80.21406 | 0.018461552 | Credible Set | purple |

Fine-mapping Regions

| snp            | chr | pos (Mb) | pp         | group        | color  |
|----------------|-----|----------|------------|--------------|--------|
| chr14:80228969 | 14  | 80.22897 | 0.01790472 | Credible Set | purple |
| chr14:80229277 | 14  | 80.22928 | 0.02419785 | Credible Set | purple |
| chr14:80229281 | 14  | 80.22928 | 0.02364378 | Credible Set | purple |
| chr14:80229399 | 14  | 80.22940 | 0.02054354 | Credible Set | purple |
| chr14:80397940 | 14  | 80.39794 | 0.01511391 | Credible Set | purple |
| chr14:80759627 | 14  | 80.75963 | 0.01351342 | Credible Set | purple |

F34 GBS, routine CBC white blood cell count

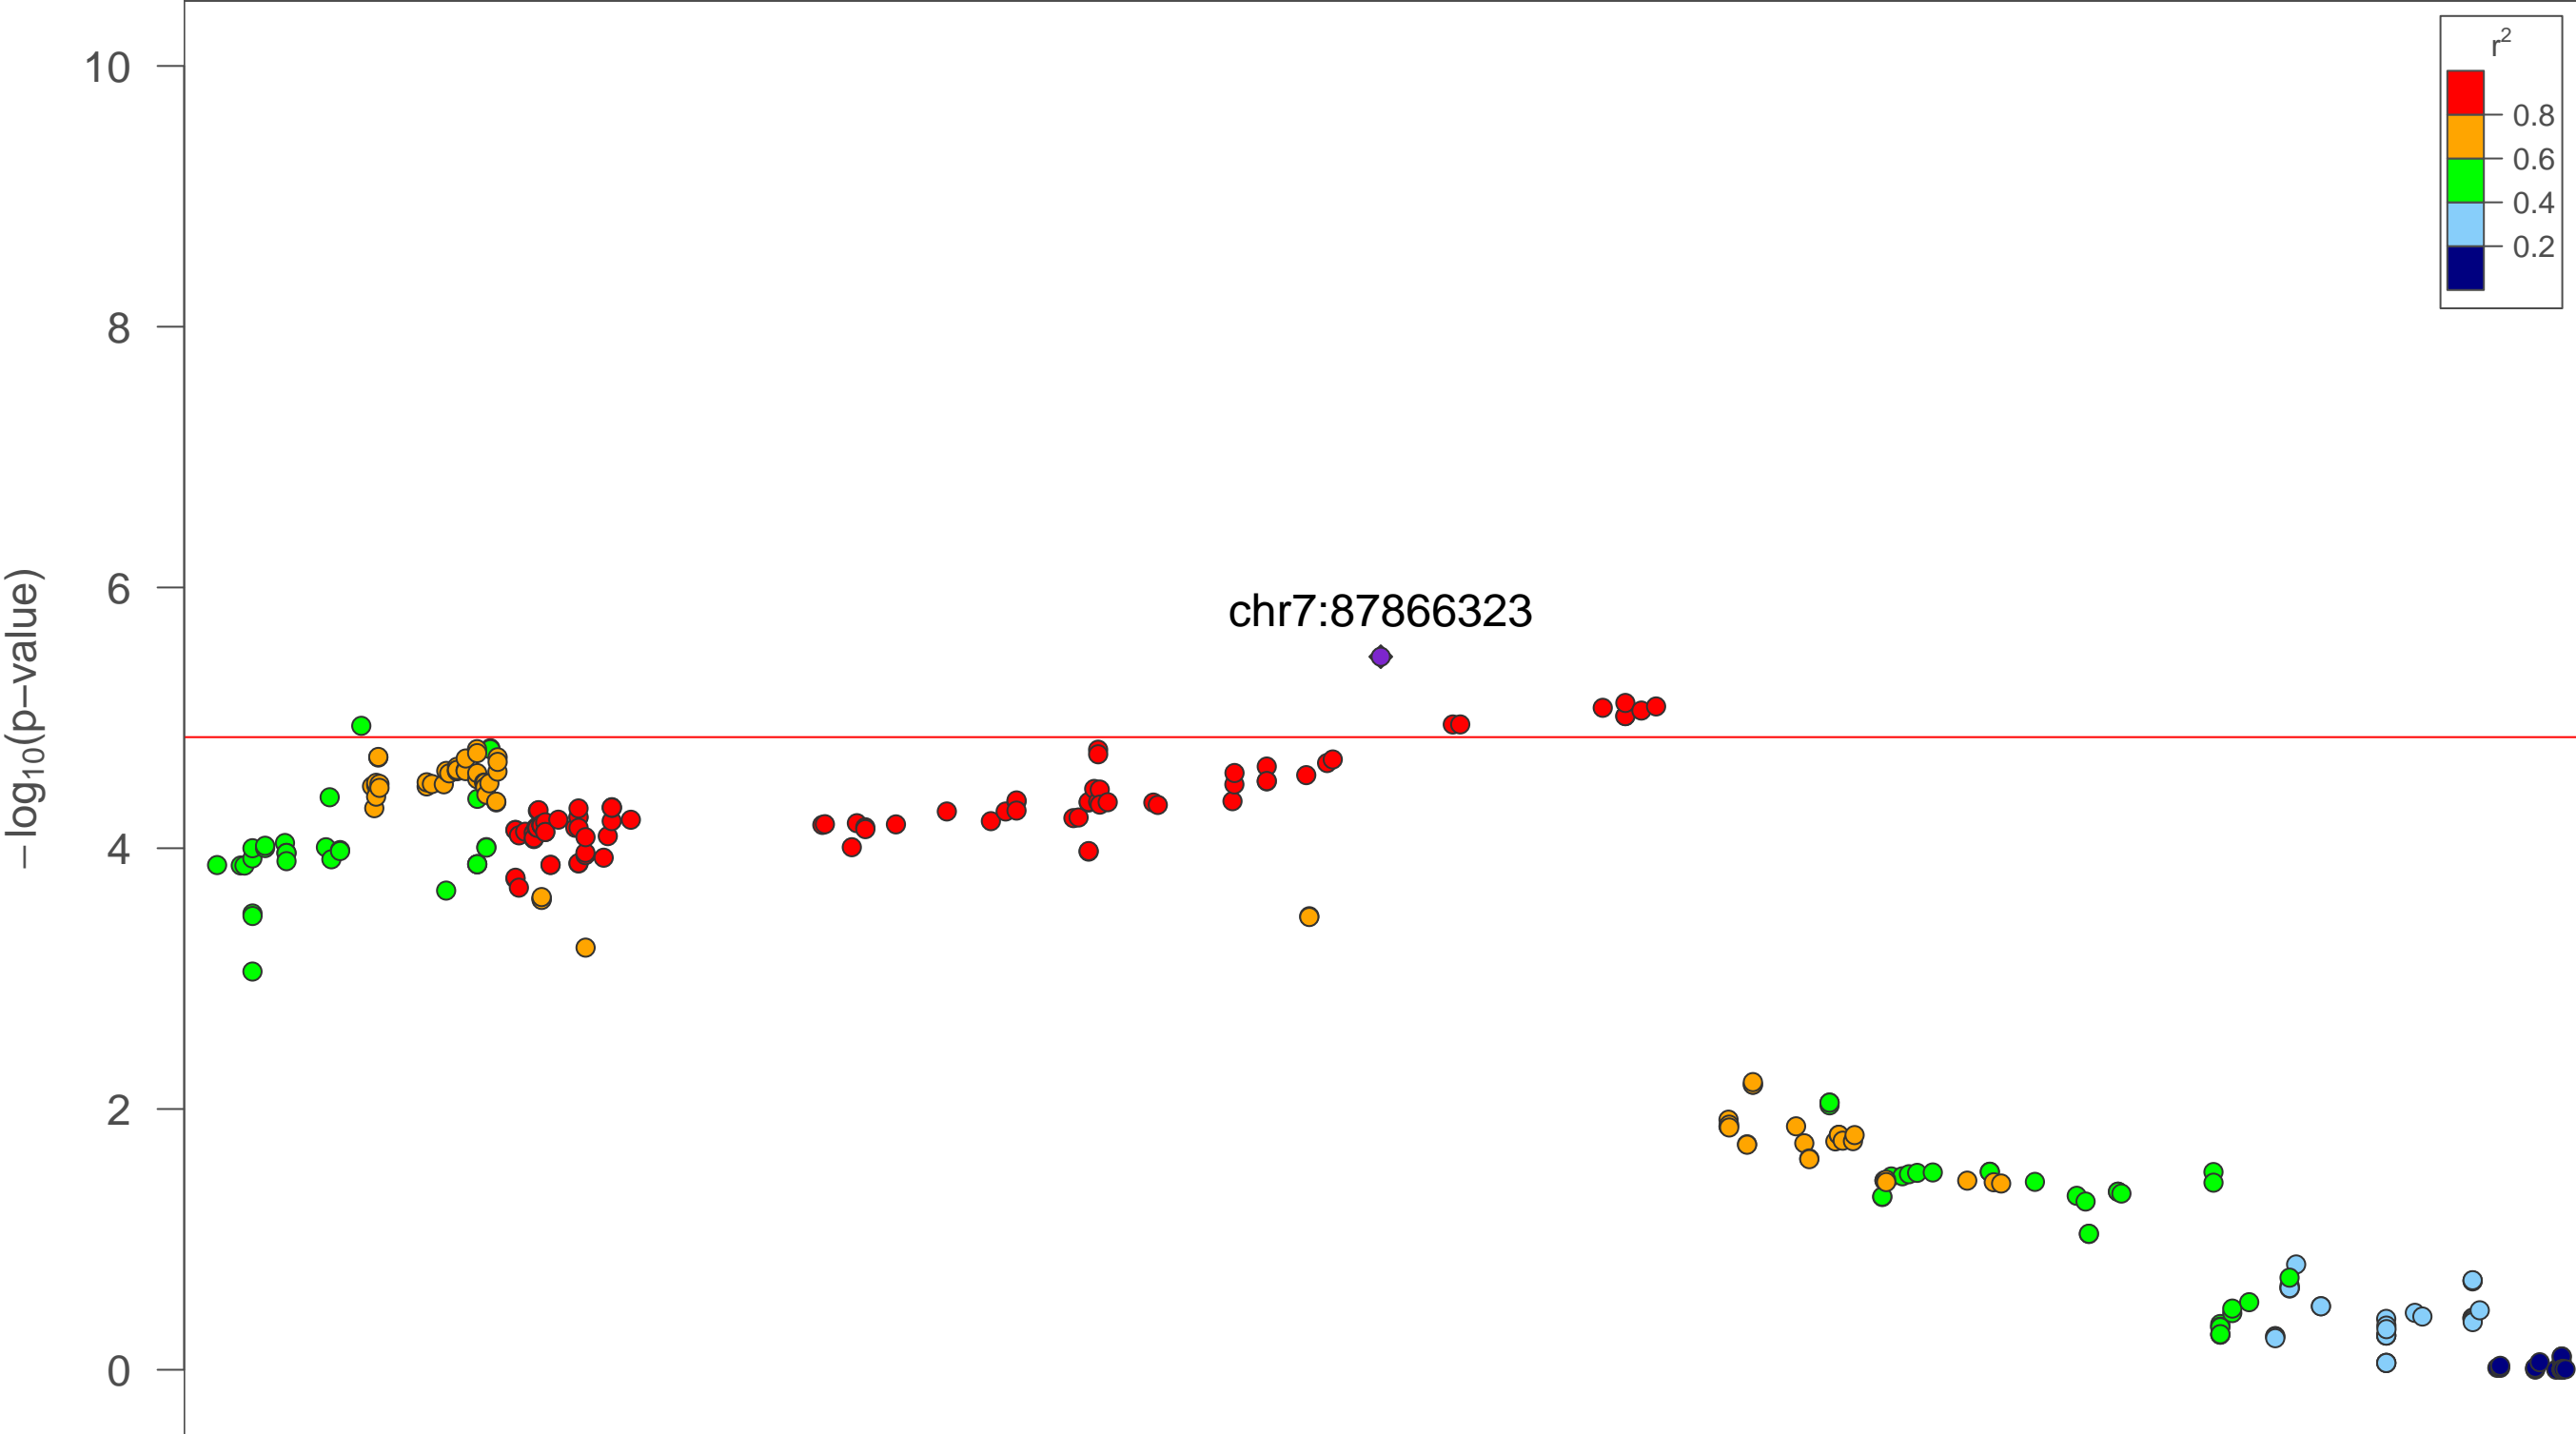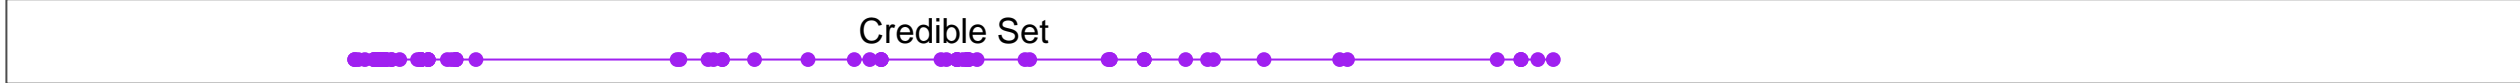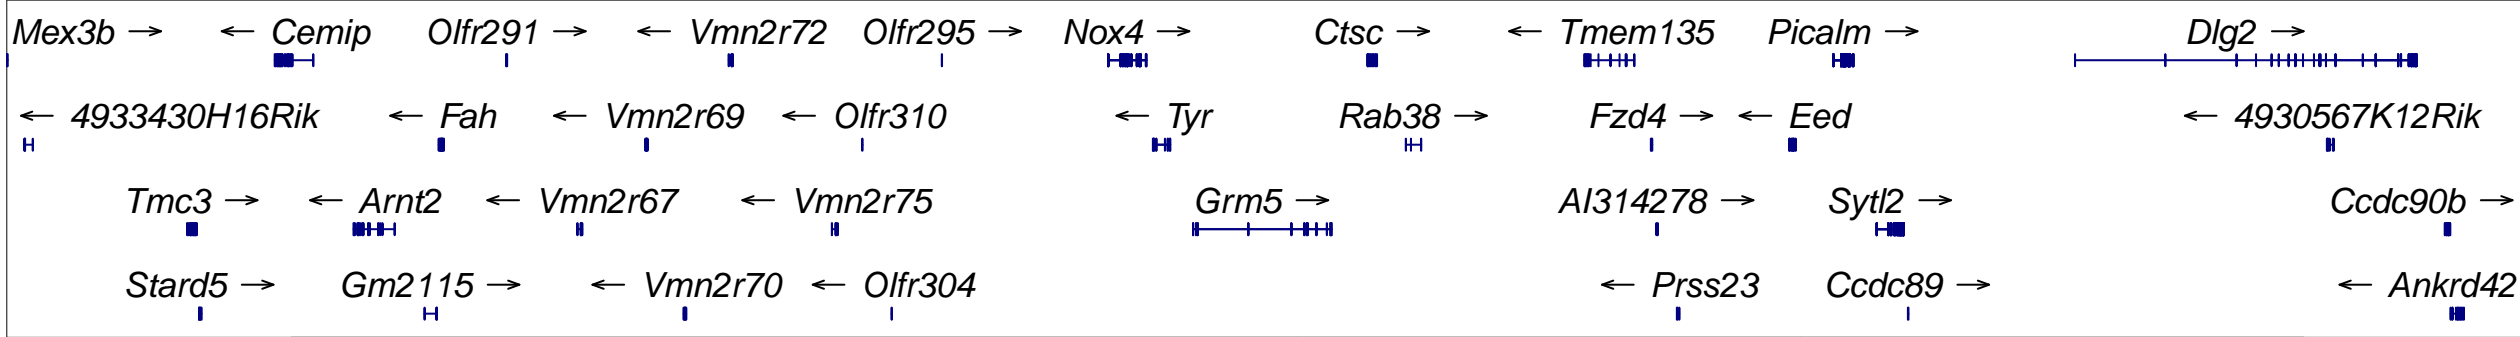

44 genes  
omitted

date: Thu Oct 25 17:00:43 2018  
build: F34GBS  
display range: chr7:82866323–92866323 [82866323–92866323]  
hilite range: 0 – 0 [ 0 – 0 ]  
reference SNP: chr7:87866323  
number of SNPs plotted: 272  
min P-value: 3.4E–6 [chr7:87866323]  
max P-value: 10E–1 [chr7:92800528]  
omitted Genes: Il16, Cfap161, Mesdc1  
omitted Genes: Mesdc2, Abhd17c, Zfand6  
omitted Genes: 2610206C17Rik, Olfr290, Vmn2r65  
omitted Genes: Vmn2r66, Vmn2r68, Vmn2r71  
omitted Genes: Vmn2r73, Vmn2r74, Vmn2r76  
omitted Genes: Olfr309, Olfr308, Olfr307  
omitted Genes: Olfr305, Olfr303, Olfr301  
omitted Genes: Olfr299, Olfr298, Olfr297  
omitted Genes: Olfr294, Olfr293, Olfr292  
omitted Genes: Folh1, Vmn2r77, Vmn2r78  
omitted Genes: Vmn2r79, Me3, Ccdc81  
omitted Genes: l7Rn6, E230029C05Rik, 2310010J17Rik  
omitted Genes: Ccdc83, Crebzf, Tmem126a  
omitted Genes: Tmem126b, Pcf11, 4632427E13Rik  
omitted Genes: Rab30, Ddias



## Fine-mapping Regions

| snp           | chr | pos (Mb) | pp          | group        | color  |
|---------------|-----|----------|-------------|--------------|--------|
| chr7:84250985 | 7   | 84.25099 | 0.005501709 | Credible Set | purple |
| chr7:84251011 | 7   | 84.25101 | 0.005475841 | Credible Set | purple |
| chr7:84265685 | 7   | 84.26569 | 0.005016557 | Credible Set | purple |
| chr7:84291540 | 7   | 84.29154 | 0.005329965 | Credible Set | purple |
| chr7:84327288 | 7   | 84.32729 | 0.005235804 | Credible Set | purple |
| chr7:84327808 | 7   | 84.32781 | 0.004717339 | Credible Set | purple |
| chr7:84327850 | 7   | 84.32785 | 0.004793861 | Credible Set | purple |
| chr7:84338595 | 7   | 84.33859 | 0.005749274 | Credible Set | purple |
| chr7:84343118 | 7   | 84.34312 | 0.005686161 | Credible Set | purple |
| chr7:84344805 | 7   | 84.34480 | 0.007572429 | Credible Set | purple |
| chr7:84347423 | 7   | 84.34742 | 0.007649440 | Credible Set | purple |
| chr7:84360038 | 7   | 84.36004 | 0.006032025 | Credible Set | purple |
| chr7:84360626 | 7   | 84.36063 | 0.005934546 | Credible Set | purple |
| chr7:84360642 | 7   | 84.36064 | 0.005934546 | Credible Set | purple |
| chr7:84360703 | 7   | 84.36070 | 0.005934546 | Credible Set | purple |
| chr7:84360714 | 7   | 84.36071 | 0.005934546 | Credible Set | purple |
| chr7:84360716 | 7   | 84.36072 | 0.005934546 | Credible Set | purple |
| chr7:84375526 | 7   | 84.37553 | 0.006240815 | Credible Set | purple |
| chr7:84375577 | 7   | 84.37558 | 0.005305038 | Credible Set | purple |
| chr7:84375642 | 7   | 84.37564 | 0.005305038 | Credible Set | purple |
| chr7:84397575 | 7   | 84.39758 | 0.003067353 | Credible Set | purple |
| chr7:84397597 | 7   | 84.39760 | 0.003067353 | Credible Set | purple |
| chr7:84430102 | 7   | 84.43010 | 0.006523611 | Credible Set | purple |
| chr7:84501082 | 7   | 84.50108 | 0.005692555 | Credible Set | purple |
| chr7:84514082 | 7   | 84.51408 | 0.006742649 | Credible Set | purple |
| chr7:84514444 | 7   | 84.51444 | 0.006831071 | Credible Set | purple |
| chr7:84514505 | 7   | 84.51450 | 0.007872161 | Credible Set | purple |
| chr7:84514564 | 7   | 84.51456 | 0.003141971 | Credible Set | purple |
| chr7:84514575 | 7   | 84.51457 | 0.003159374 | Credible Set | purple |
| chr7:84514734 | 7   | 84.51473 | 0.005690317 | Credible Set | purple |
| chr7:84543346 | 7   | 84.54335 | 0.003607470 | Credible Set | purple |
| chr7:84543355 | 7   | 84.54336 | 0.003751895 | Credible Set | purple |
| chr7:84543782 | 7   | 84.54378 | 0.004868379 | Credible Set | purple |
| chr7:84619632 | 7   | 84.61963 | 0.003458170 | Credible Set | purple |
| chr7:84636759 | 7   | 84.63676 | 0.004954218 | Credible Set | purple |
| chr7:84653095 | 7   | 84.65309 | 0.006367397 | Credible Set | purple |

## Fine-mapping Regions

| snp           | chr | pos (Mb) | pp          | group        | color  |
|---------------|-----|----------|-------------|--------------|--------|
| chr7:84653660 | 7   | 84.65366 | 0.008037400 | Credible Set | purple |
| chr7:84653702 | 7   | 84.65370 | 0.007946669 | Credible Set | purple |
| chr7:84653707 | 7   | 84.65371 | 0.007985099 | Credible Set | purple |
| chr7:84733186 | 7   | 84.73319 | 0.006513920 | Credible Set | purple |
| chr7:85533207 | 7   | 85.53321 | 0.005973992 | Credible Set | purple |
| chr7:85543843 | 7   | 85.54384 | 0.006046224 | Credible Set | purple |
| chr7:85656243 | 7   | 85.65624 | 0.004116651 | Credible Set | purple |
| chr7:85677494 | 7   | 85.67749 | 0.006148412 | Credible Set | purple |
| chr7:85712663 | 7   | 85.71266 | 0.005744222 | Credible Set | purple |
| chr7:85712975 | 7   | 85.71298 | 0.005566094 | Credible Set | purple |
| chr7:85840665 | 7   | 85.84067 | 0.006027668 | Credible Set | purple |
| chr7:86053386 | 7   | 86.05339 | 0.007480299 | Credible Set | purple |
| chr7:86237374 | 7   | 86.23737 | 0.006361786 | Credible Set | purple |
| chr7:86298979 | 7   | 86.29898 | 0.007477890 | Credible Set | purple |
| chr7:86344420 | 7   | 86.34442 | 0.008818260 | Credible Set | purple |
| chr7:86344437 | 7   | 86.34444 | 0.009002727 | Credible Set | purple |
| chr7:86344488 | 7   | 86.34449 | 0.007594144 | Credible Set | purple |
| chr7:86582139 | 7   | 86.58214 | 0.006693461 | Credible Set | purple |
| chr7:86603770 | 7   | 86.60377 | 0.006766168 | Credible Set | purple |
| chr7:86645719 | 7   | 86.64572 | 0.003824593 | Credible Set | purple |
| chr7:86645792 | 7   | 86.64579 | 0.003862274 | Credible Set | purple |
| chr7:86645947 | 7   | 86.64595 | 0.008697316 | Credible Set | purple |
| chr7:86645990 | 7   | 86.64599 | 0.008776408 | Credible Set | purple |
| chr7:86668998 | 7   | 86.66900 | 0.010918322 | Credible Set | purple |
| chr7:86685426 | 7   | 86.68543 | 0.021104555 | Credible Set | purple |
| chr7:86685507 | 7   | 86.68551 | 0.019524378 | Credible Set | purple |
| chr7:86685648 | 7   | 86.68565 | 0.008808600 | Credible Set | purple |
| chr7:86692214 | 7   | 86.69221 | 0.010800522 | Credible Set | purple |
| chr7:86692491 | 7   | 86.69249 | 0.008386308 | Credible Set | purple |
| chr7:86725518 | 7   | 86.72552 | 0.008731934 | Credible Set | purple |
| chr7:86916161 | 7   | 86.91616 | 0.008683614 | Credible Set | purple |
| chr7:86934710 | 7   | 86.93471 | 0.008346359 | Credible Set | purple |
| chr7:87246786 | 7   | 87.24679 | 0.008888467 | Credible Set | purple |
| chr7:87254690 | 7   | 87.25469 | 0.011770641 | Credible Set | purple |
| chr7:87255156 | 7   | 87.25516 | 0.014260261 | Credible Set | purple |
| chr7:87389952 | 7   | 87.38995 | 0.015900164 | Credible Set | purple |

Fine-mapping Regions

| snp           | chr | pos (Mb) | pp         | group        | color  |
|---------------|-----|----------|------------|--------------|--------|
| chr7:87389989 | 7   | 87.38999 | 0.01238772 | Credible Set | purple |
| chr7:87390014 | 7   | 87.39001 | 0.01246453 | Credible Set | purple |
| chr7:87554961 | 7   | 87.55496 | 0.01375690 | Credible Set | purple |
| chr7:87642045 | 7   | 87.64204 | 0.01685574 | Credible Set | purple |
| chr7:87665727 | 7   | 87.66573 | 0.01790927 | Credible Set | purple |
| chr7:87866323 | 7   | 87.86632 | 0.10136765 | Credible Set | purple |
| chr7:88167216 | 7   | 88.16722 | 0.03228100 | Credible Set | purple |
| chr7:88198240 | 7   | 88.19824 | 0.03228262 | Credible Set | purple |
| chr7:88793653 | 7   | 88.79365 | 0.04273059 | Credible Set | purple |
| chr7:88888100 | 7   | 88.88810 | 0.03716292 | Credible Set | purple |
| chr7:88888124 | 7   | 88.88812 | 0.03716292 | Credible Set | purple |
| chr7:88888200 | 7   | 88.88820 | 0.04640861 | Credible Set | purple |
| chr7:88955188 | 7   | 88.95519 | 0.04081574 | Credible Set | purple |
| chr7:89016577 | 7   | 89.01658 | 0.04373922 | Credible Set | purple |

F34 GBS, routine CBC white blood cell count

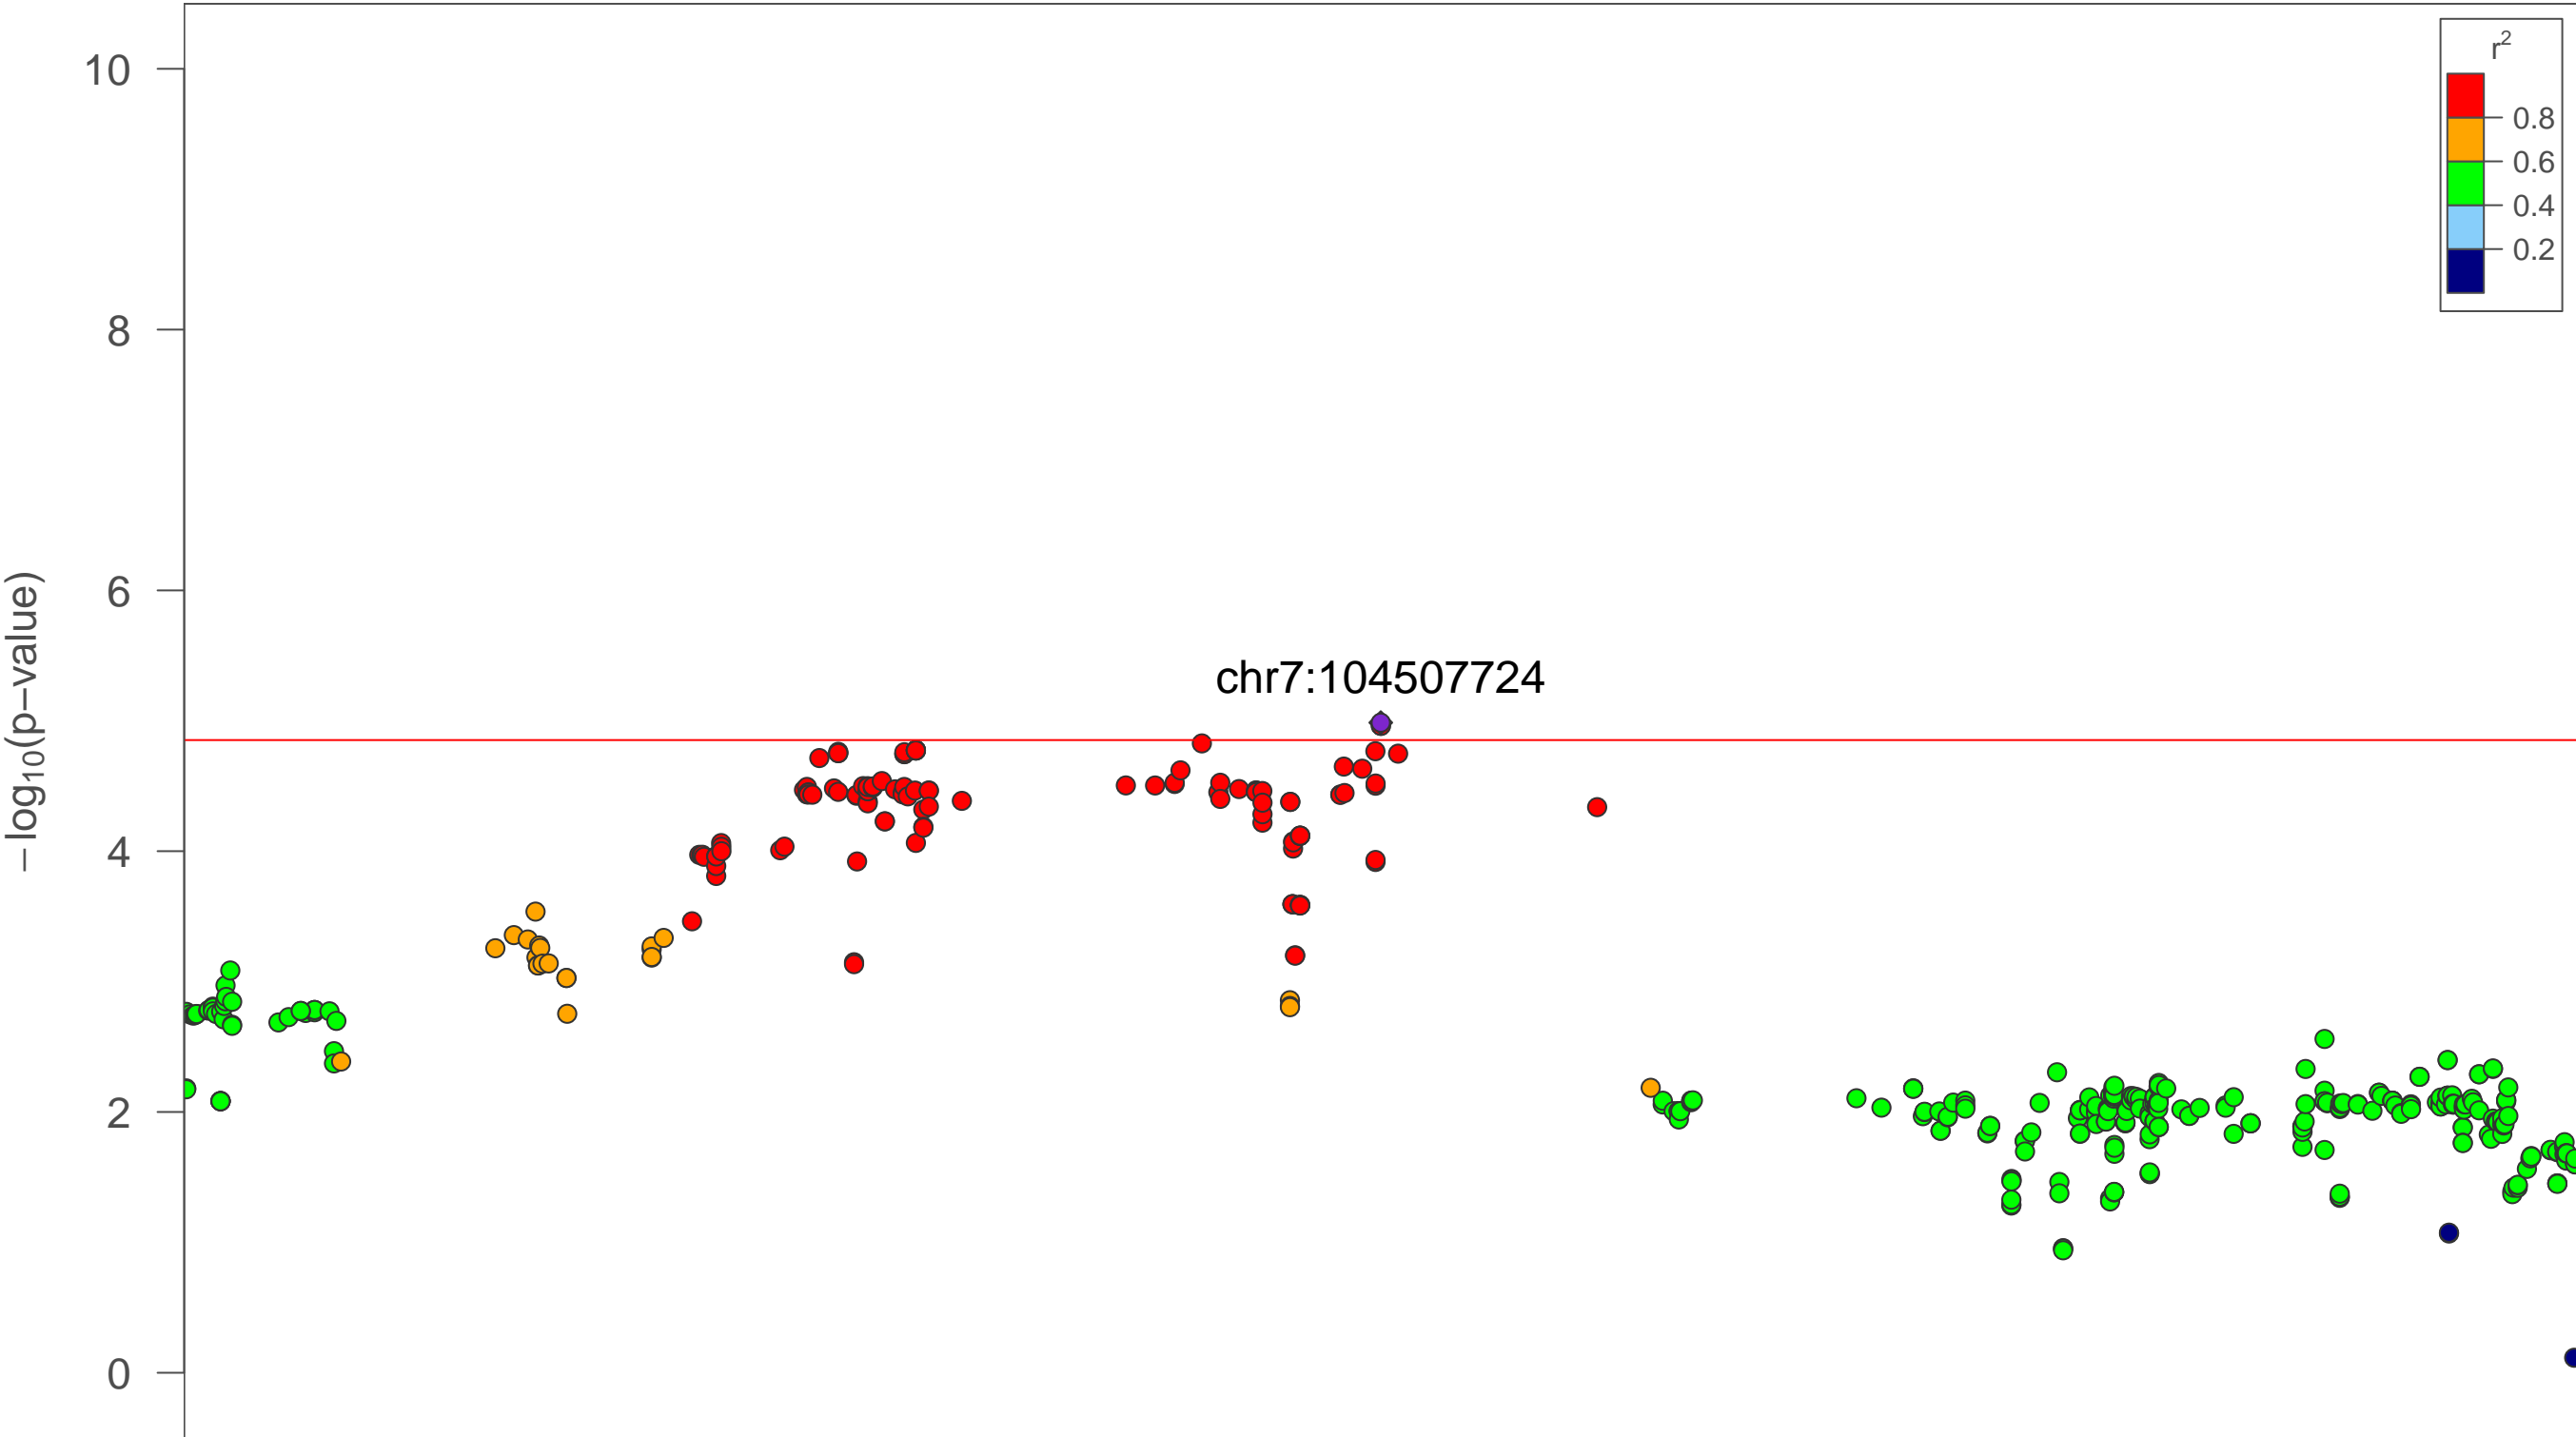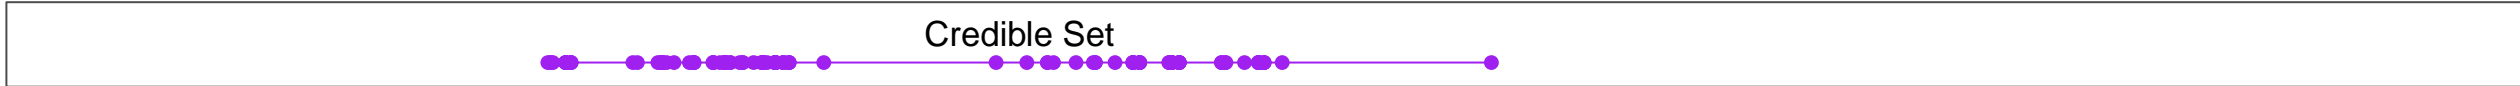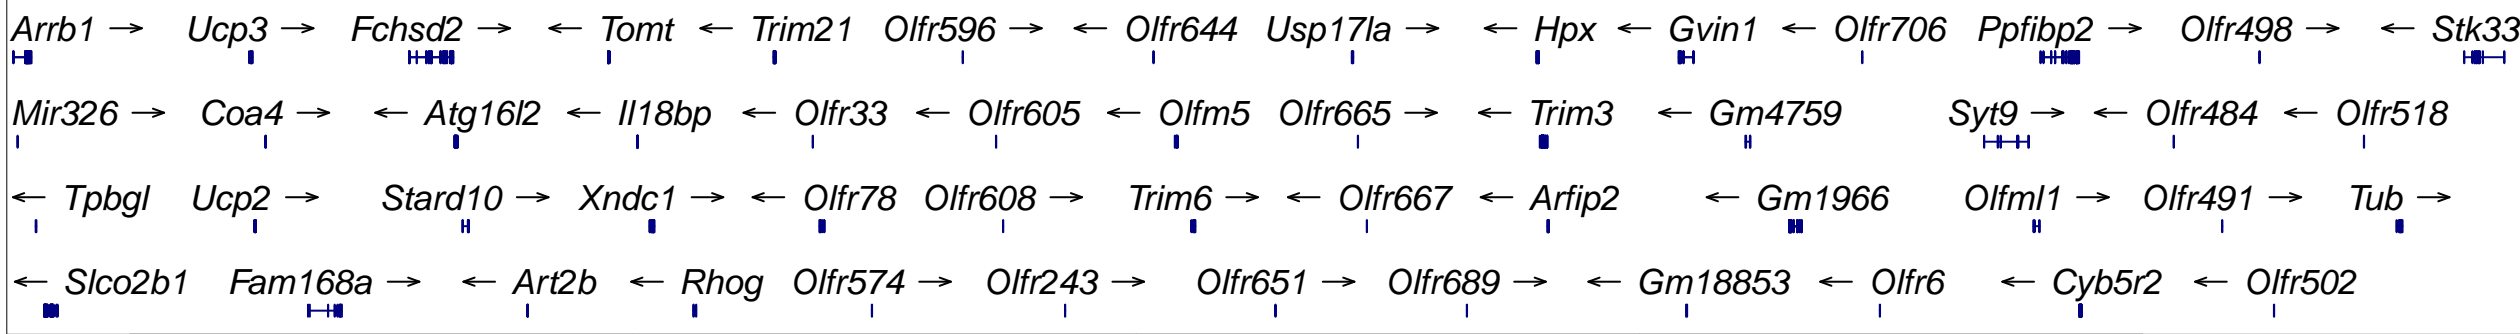

269 genes  
omitted

Omitted Genes: Usp17lc Olfr606 Olfr609

## Fine-mapping Regions

| snp            | chr | pos (Mb) | pp          | group        | color  |
|----------------|-----|----------|-------------|--------------|--------|
| chr7:101660383 | 7   | 101.6604 | 0.003134497 | Credible Set | purple |
| chr7:101669186 | 7   | 101.6692 | 0.003119559 | Credible Set | purple |
| chr7:101673483 | 7   | 101.6735 | 0.003137235 | Credible Set | purple |
| chr7:101680140 | 7   | 101.6801 | 0.003034775 | Credible Set | purple |
| chr7:101731061 | 7   | 101.7311 | 0.003066289 | Credible Set | purple |
| chr7:101731110 | 7   | 101.7311 | 0.002205150 | Credible Set | purple |
| chr7:101731130 | 7   | 101.7311 | 0.002601388 | Credible Set | purple |
| chr7:101731658 | 7   | 101.7317 | 0.003051814 | Credible Set | purple |
| chr7:101751790 | 7   | 101.7518 | 0.003815374 | Credible Set | purple |
| chr7:101752580 | 7   | 101.7526 | 0.003585198 | Credible Set | purple |
| chr7:101752971 | 7   | 101.7530 | 0.003329312 | Credible Set | purple |
| chr7:101998679 | 7   | 101.9987 | 0.003384327 | Credible Set | purple |
| chr7:102016307 | 7   | 102.0163 | 0.003595272 | Credible Set | purple |
| chr7:102098054 | 7   | 102.0981 | 0.009278800 | Credible Set | purple |
| chr7:102110109 | 7   | 102.1101 | 0.009760998 | Credible Set | purple |
| chr7:102110501 | 7   | 102.1105 | 0.008607181 | Credible Set | purple |
| chr7:102116318 | 7   | 102.1163 | 0.008893541 | Credible Set | purple |
| chr7:102116430 | 7   | 102.1164 | 0.008893541 | Credible Set | purple |
| chr7:102116478 | 7   | 102.1165 | 0.008598750 | Credible Set | purple |
| chr7:102132562 | 7   | 102.1326 | 0.008566080 | Credible Set | purple |
| chr7:102162058 | 7   | 102.1621 | 0.015849017 | Credible Set | purple |
| chr7:102223396 | 7   | 102.2234 | 0.009521621 | Credible Set | purple |
| chr7:102240695 | 7   | 102.2407 | 0.008983457 | Credible Set | purple |
| chr7:102241191 | 7   | 102.2412 | 0.017604614 | Credible Set | purple |
| chr7:102241211 | 7   | 102.2412 | 0.017218708 | Credible Set | purple |
| chr7:102241212 | 7   | 102.2412 | 0.017212173 | Credible Set | purple |
| chr7:102317213 | 7   | 102.3172 | 0.008417846 | Credible Set | purple |
| chr7:102317246 | 7   | 102.3172 | 0.008523494 | Credible Set | purple |
| chr7:102319586 | 7   | 102.3196 | 0.002807123 | Credible Set | purple |
| chr7:102344970 | 7   | 102.3450 | 0.009893181 | Credible Set | purple |
| chr7:102363897 | 7   | 102.3639 | 0.009878185 | Credible Set | purple |
| chr7:102364204 | 7   | 102.3642 | 0.007674797 | Credible Set | purple |
| chr7:102364223 | 7   | 102.3642 | 0.007409394 | Credible Set | purple |
| chr7:102364315 | 7   | 102.3643 | 0.009087320 | Credible Set | purple |
| chr7:102364326 | 7   | 102.3643 | 0.009087320 | Credible Set | purple |
| chr7:102364411 | 7   | 102.3644 | 0.009740598 | Credible Set | purple |

## Fine-mapping Regions

| snp            | chr | pos (Mb) | pp          | group        | color  |
|----------------|-----|----------|-------------|--------------|--------|
| chr7:102385520 | 7   | 102.3855 | 0.009649962 | Credible Set | purple |
| chr7:102385536 | 7   | 102.3855 | 0.009838476 | Credible Set | purple |
| chr7:102423165 | 7   | 102.4232 | 0.010766295 | Credible Set | purple |
| chr7:102435692 | 7   | 102.4357 | 0.005481659 | Credible Set | purple |
| chr7:102435720 | 7   | 102.4357 | 0.005481659 | Credible Set | purple |
| chr7:102478469 | 7   | 102.4785 | 0.009373951 | Credible Set | purple |
| chr7:102510475 | 7   | 102.5105 | 0.008829658 | Credible Set | purple |
| chr7:102510607 | 7   | 102.5106 | 0.008615186 | Credible Set | purple |
| chr7:102516878 | 7   | 102.5169 | 0.009752256 | Credible Set | purple |
| chr7:102517238 | 7   | 102.5172 | 0.016944462 | Credible Set | purple |
| chr7:102517241 | 7   | 102.5172 | 0.016914451 | Credible Set | purple |
| chr7:102517247 | 7   | 102.5172 | 0.017488843 | Credible Set | purple |
| chr7:102531652 | 7   | 102.5317 | 0.008330102 | Credible Set | purple |
| chr7:102561708 | 7   | 102.5617 | 0.009182845 | Credible Set | purple |
| chr7:102565262 | 7   | 102.5653 | 0.018126622 | Credible Set | purple |
| chr7:102565292 | 7   | 102.5653 | 0.017976917 | Credible Set | purple |
| chr7:102565307 | 7   | 102.5653 | 0.018158430 | Credible Set | purple |
| chr7:102565323 | 7   | 102.5653 | 0.018008463 | Credible Set | purple |
| chr7:102565329 | 7   | 102.5653 | 0.018008463 | Credible Set | purple |
| chr7:102565410 | 7   | 102.5654 | 0.003824409 | Credible Set | purple |
| chr7:102596442 | 7   | 102.5964 | 0.006676858 | Credible Set | purple |
| chr7:102596578 | 7   | 102.5966 | 0.005007568 | Credible Set | purple |
| chr7:102596636 | 7   | 102.5966 | 0.004930290 | Credible Set | purple |
| chr7:102619418 | 7   | 102.6194 | 0.009189028 | Credible Set | purple |
| chr7:102619431 | 7   | 102.6194 | 0.009164687 | Credible Set | purple |
| chr7:102619466 | 7   | 102.6195 | 0.007013656 | Credible Set | purple |
| chr7:102757499 | 7   | 102.7575 | 0.007726660 | Credible Set | purple |
| chr7:103442570 | 7   | 103.4426 | 0.010005887 | Credible Set | purple |
| chr7:103564836 | 7   | 103.5648 | 0.009997328 | Credible Set | purple |
| chr7:103646439 | 7   | 103.6464 | 0.010250965 | Credible Set | purple |
| chr7:103646709 | 7   | 103.6467 | 0.010462968 | Credible Set | purple |
| chr7:103671033 | 7   | 103.6710 | 0.012894201 | Credible Set | purple |
| chr7:103760301 | 7   | 103.7603 | 0.020276455 | Credible Set | purple |
| chr7:103829200 | 7   | 103.8292 | 0.008920566 | Credible Set | purple |
| chr7:103837099 | 7   | 103.8371 | 0.010470456 | Credible Set | purple |
| chr7:103837213 | 7   | 103.8372 | 0.007981410 | Credible Set | purple |

## Fine-mapping Regions

| snp            | chr | pos (Mb) | pp          | group        | color  |
|----------------|-----|----------|-------------|--------------|--------|
| chr7:103915503 | 7   | 103.9155 | 0.009415993 | Credible Set | purple |
| chr7:103986792 | 7   | 103.9868 | 0.009194444 | Credible Set | purple |
| chr7:103986795 | 7   | 103.9868 | 0.009194444 | Credible Set | purple |
| chr7:103986857 | 7   | 103.9869 | 0.008944166 | Credible Set | purple |
| chr7:103986860 | 7   | 103.9869 | 0.008944166 | Credible Set | purple |
| chr7:104012808 | 7   | 104.0128 | 0.009113036 | Credible Set | purple |
| chr7:104013370 | 7   | 104.0134 | 0.005364078 | Credible Set | purple |
| chr7:104013395 | 7   | 104.0134 | 0.006178234 | Credible Set | purple |
| chr7:104013467 | 7   | 104.0135 | 0.007492059 | Credible Set | purple |
| chr7:104129734 | 7   | 104.1297 | 0.007593289 | Credible Set | purple |
| chr7:104129736 | 7   | 104.1297 | 0.007593289 | Credible Set | purple |
| chr7:104138934 | 7   | 104.1389 | 0.001377872 | Credible Set | purple |
| chr7:104138936 | 7   | 104.1389 | 0.001381271 | Credible Set | purple |
| chr7:104138968 | 7   | 104.1390 | 0.001381271 | Credible Set | purple |
| chr7:104141343 | 7   | 104.1413 | 0.003480258 | Credible Set | purple |
| chr7:104141705 | 7   | 104.1417 | 0.003919792 | Credible Set | purple |
| chr7:104141768 | 7   | 104.1418 | 0.003857797 | Credible Set | purple |
| chr7:104170518 | 7   | 104.1705 | 0.001363535 | Credible Set | purple |
| chr7:104170588 | 7   | 104.1706 | 0.004306815 | Credible Set | purple |
| chr7:104170594 | 7   | 104.1706 | 0.004293377 | Credible Set | purple |
| chr7:104170618 | 7   | 104.1706 | 0.004315962 | Credible Set | purple |
| chr7:104170662 | 7   | 104.1707 | 0.004315962 | Credible Set | purple |
| chr7:104338784 | 7   | 104.3388 | 0.008594047 | Credible Set | purple |
| chr7:104338810 | 7   | 104.3388 | 0.008541118 | Credible Set | purple |
| chr7:104353491 | 7   | 104.3535 | 0.013734151 | Credible Set | purple |
| chr7:104356230 | 7   | 104.3562 | 0.008810938 | Credible Set | purple |
| chr7:104430205 | 7   | 104.4302 | 0.013252966 | Credible Set | purple |
| chr7:104485236 | 7   | 104.4852 | 0.017776242 | Credible Set | purple |
| chr7:104485721 | 7   | 104.4857 | 0.002784109 | Credible Set | purple |
| chr7:104485727 | 7   | 104.4857 | 0.002878544 | Credible Set | purple |
| chr7:104486022 | 7   | 104.4860 | 0.009960934 | Credible Set | purple |
| chr7:104486041 | 7   | 104.4860 | 0.010332955 | Credible Set | purple |
| chr7:104507724 | 7   | 104.5077 | 0.028757333 | Credible Set | purple |
| chr7:104508127 | 7   | 104.5081 | 0.027279761 | Credible Set | purple |
| chr7:104508173 | 7   | 104.5082 | 0.027266602 | Credible Set | purple |
| chr7:104580091 | 7   | 104.5801 | 0.017066721 | Credible Set | purple |



Fine-mapping Regions

| snp            | chr | pos (Mb) | pp          | group        | color  |
|----------------|-----|----------|-------------|--------------|--------|
| chr7:105411752 | 7   | 105.4118 | 0.006951717 | Credible Set | purple |

F34 GBS, routine CBC white blood cell count

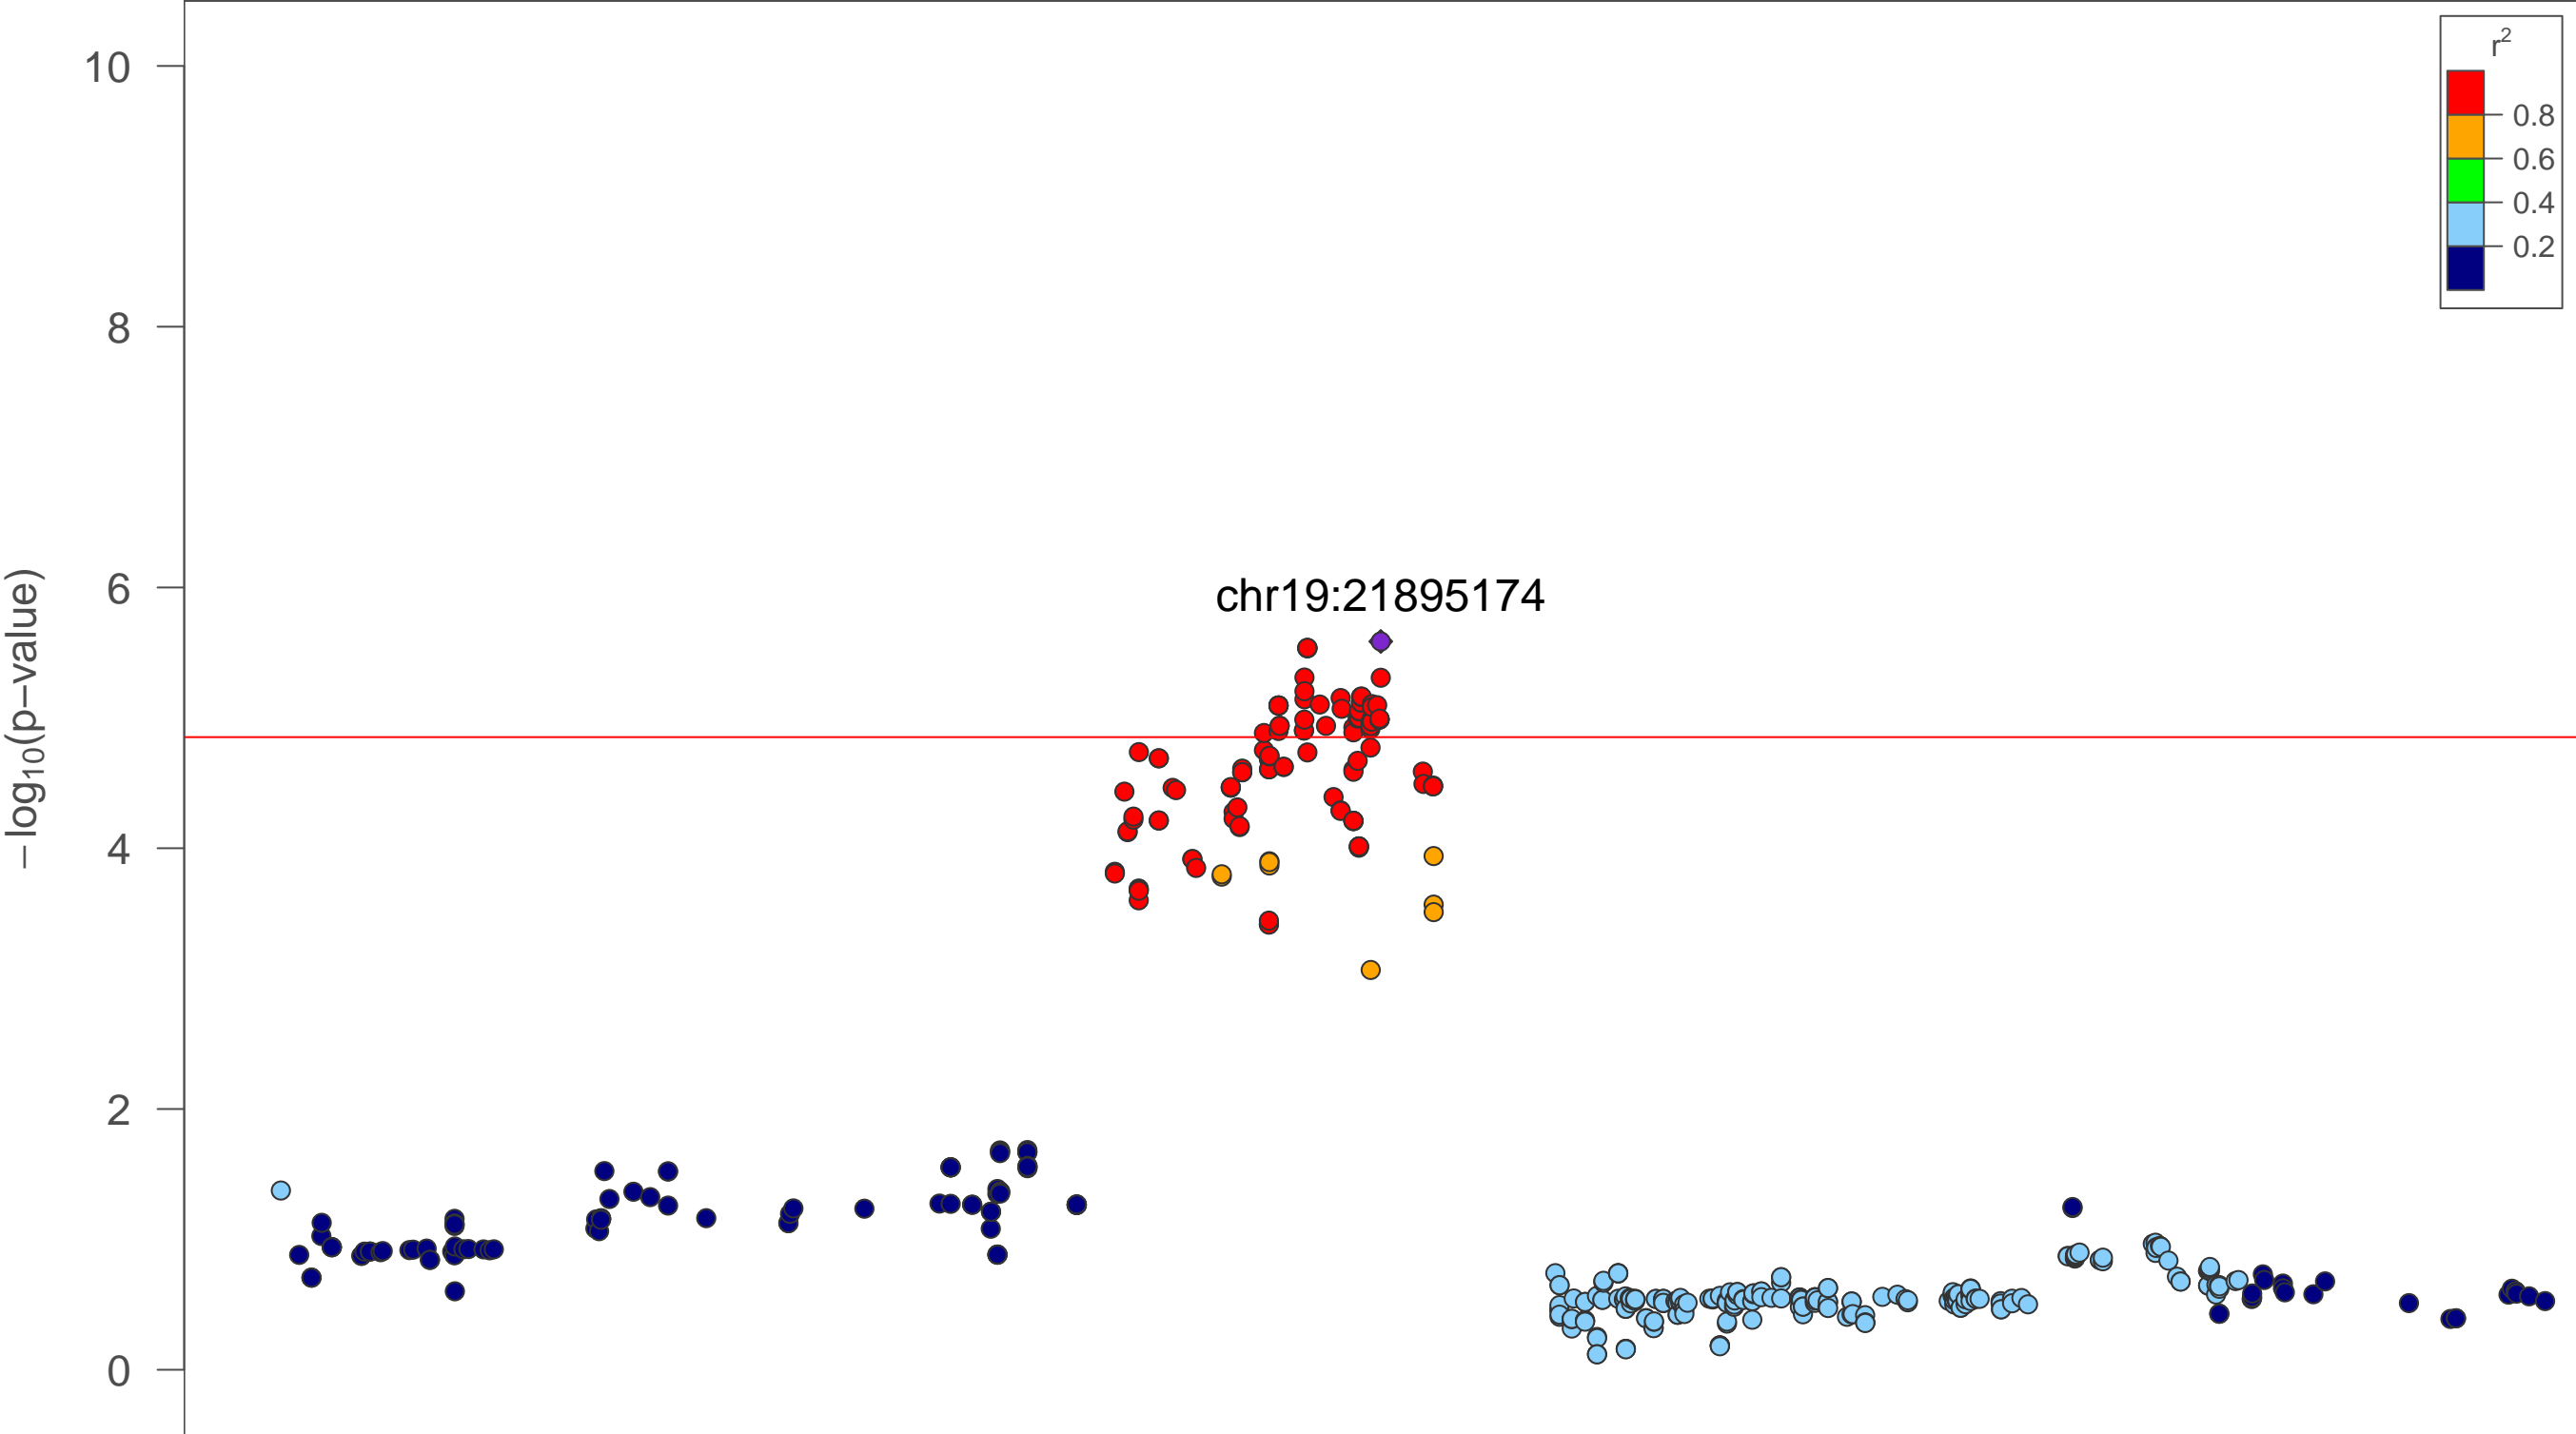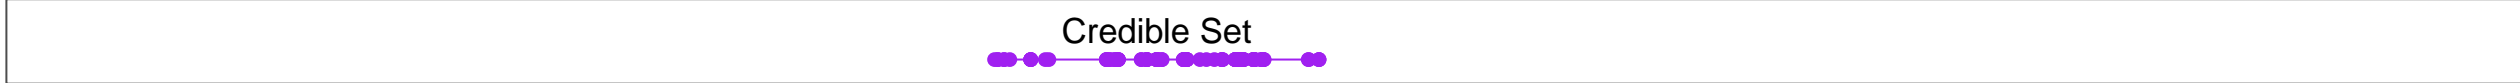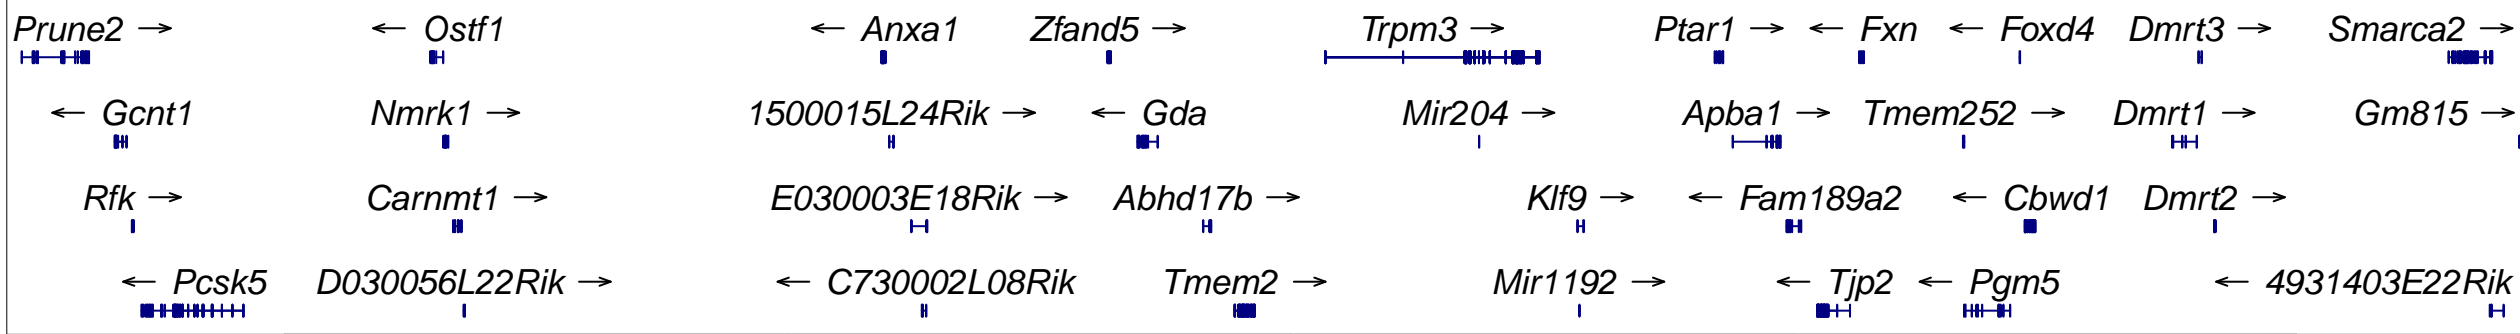

16 genes  
omitted

date: Thu Oct 25 17:00:16 2018

build: F34GBS

display range: chr19:16895174–26895174 [16895174–26895174]

hilite range: 0 – 0 [ 0 – 0 ]

reference SNP: chr19:21895174

number of SNPs plotted: 470

min P-value: 2.59E–6 [chr19:21895174]

max P-value: 7.62E–1 [chr19:22798742]

omitted Genes: Trpm6, Rorb, Aldh1a1

omitted Genes: Aldh1a7, Tmc1, 4930554I06Rik

omitted Genes: 1110059E24Rik, Smc5, Mamdc2

omitted Genes: 1700028P14Rik, Pip5k1b, Fam122a

omitted Genes: Mir3084–1, Dock8, Kank1

omitted Genes: 2610016A17Rik

## Fine-mapping Regions

| snp            | chr | pos (Mb) | pp          | group        | color  |
|----------------|-----|----------|-------------|--------------|--------|
| chr19:20824062 | 19  | 20.82406 | 0.003479946 | Credible Set | purple |
| chr19:20837340 | 19  | 20.83734 | 0.001766335 | Credible Set | purple |
| chr19:20837342 | 19  | 20.83734 | 0.001792071 | Credible Set | purple |
| chr19:20861811 | 19  | 20.86181 | 0.002176357 | Credible Set | purple |
| chr19:20861821 | 19  | 20.86182 | 0.002290864 | Credible Set | purple |
| chr19:20884530 | 19  | 20.88453 | 0.006761317 | Credible Set | purple |
| chr19:20967742 | 19  | 20.96774 | 0.002144878 | Credible Set | purple |
| chr19:20967772 | 19  | 20.96777 | 0.002147991 | Credible Set | purple |
| chr19:20967840 | 19  | 20.96784 | 0.006083086 | Credible Set | purple |
| chr19:20967865 | 19  | 20.96786 | 0.006093708 | Credible Set | purple |
| chr19:21025668 | 19  | 21.02567 | 0.003706715 | Credible Set | purple |
| chr19:21039744 | 19  | 21.03974 | 0.003568918 | Credible Set | purple |
| chr19:21268525 | 19  | 21.26853 | 0.003719266 | Credible Set | purple |
| chr19:21268527 | 19  | 21.26853 | 0.003726990 | Credible Set | purple |
| chr19:21268550 | 19  | 21.26855 | 0.003758563 | Credible Set | purple |
| chr19:21280282 | 19  | 21.28028 | 0.002478884 | Credible Set | purple |
| chr19:21280286 | 19  | 21.28029 | 0.002210847 | Credible Set | purple |
| chr19:21296098 | 19  | 21.29610 | 0.002672970 | Credible Set | purple |
| chr19:21305518 | 19  | 21.30552 | 0.001923346 | Credible Set | purple |
| chr19:21305568 | 19  | 21.30557 | 0.001952204 | Credible Set | purple |
| chr19:21316234 | 19  | 21.31623 | 0.005121764 | Credible Set | purple |
| chr19:21316268 | 19  | 21.31627 | 0.004811437 | Credible Set | purple |
| chr19:21316305 | 19  | 21.31630 | 0.004823994 | Credible Set | purple |
| chr19:21407108 | 19  | 21.40711 | 0.006981278 | Credible Set | purple |
| chr19:21407182 | 19  | 21.40718 | 0.009324381 | Credible Set | purple |
| chr19:21428151 | 19  | 21.42815 | 0.005962054 | Credible Set | purple |
| chr19:21428338 | 19  | 21.42834 | 0.005063110 | Credible Set | purple |
| chr19:21428343 | 19  | 21.42834 | 0.005063110 | Credible Set | purple |
| chr19:21430361 | 19  | 21.43036 | 0.006292518 | Credible Set | purple |
| chr19:21430412 | 19  | 21.43041 | 0.006353994 | Credible Set | purple |
| chr19:21467882 | 19  | 21.46788 | 0.009646199 | Credible Set | purple |
| chr19:21467967 | 19  | 21.46797 | 0.014776152 | Credible Set | purple |
| chr19:21467982 | 19  | 21.46798 | 0.014850830 | Credible Set | purple |
| chr19:21467985 | 19  | 21.46798 | 0.014850830 | Credible Set | purple |
| chr19:21467987 | 19  | 21.46799 | 0.014813541 | Credible Set | purple |
| chr19:21472509 | 19  | 21.47251 | 0.010549821 | Credible Set | purple |

## Fine-mapping Regions

| snp            | chr | pos (Mb) | pp          | group        | color  |
|----------------|-----|----------|-------------|--------------|--------|
| chr19:21472526 | 19  | 21.47253 | 0.010517116 | Credible Set | purple |
| chr19:21489550 | 19  | 21.48955 | 0.005257509 | Credible Set | purple |
| chr19:21489579 | 19  | 21.48958 | 0.005292122 | Credible Set | purple |
| chr19:21574198 | 19  | 21.57420 | 0.009713901 | Credible Set | purple |
| chr19:21574202 | 19  | 21.57420 | 0.009748026 | Credible Set | purple |
| chr19:21575782 | 19  | 21.57578 | 0.011679622 | Credible Set | purple |
| chr19:21576364 | 19  | 21.57636 | 0.023787792 | Credible Set | purple |
| chr19:21576365 | 19  | 21.57636 | 0.016462767 | Credible Set | purple |
| chr19:21576374 | 19  | 21.57637 | 0.018862607 | Credible Set | purple |
| chr19:21588462 | 19  | 21.58846 | 0.039243530 | Credible Set | purple |
| chr19:21588470 | 19  | 21.58847 | 0.039191513 | Credible Set | purple |
| chr19:21588527 | 19  | 21.58853 | 0.038982712 | Credible Set | purple |
| chr19:21588528 | 19  | 21.58853 | 0.039275032 | Credible Set | purple |
| chr19:21588608 | 19  | 21.58861 | 0.006724028 | Credible Set | purple |
| chr19:21640403 | 19  | 21.64040 | 0.015070885 | Credible Set | purple |
| chr19:21666239 | 19  | 21.66624 | 0.010518703 | Credible Set | purple |
| chr19:21697884 | 19  | 21.69788 | 0.003177776 | Credible Set | purple |
| chr19:21727318 | 19  | 21.72732 | 0.002543642 | Credible Set | purple |
| chr19:21727391 | 19  | 21.72739 | 0.002520819 | Credible Set | purple |
| chr19:21727561 | 19  | 21.72756 | 0.016824376 | Credible Set | purple |
| chr19:21731633 | 19  | 21.73163 | 0.014019582 | Credible Set | purple |
| chr19:21780788 | 19  | 21.78079 | 0.010236000 | Credible Set | purple |
| chr19:21780850 | 19  | 21.78085 | 0.009426365 | Credible Set | purple |
| chr19:21780922 | 19  | 21.78092 | 0.002127112 | Credible Set | purple |
| chr19:21780928 | 19  | 21.78093 | 0.002124246 | Credible Set | purple |
| chr19:21780934 | 19  | 21.78093 | 0.002134882 | Credible Set | purple |
| chr19:21780935 | 19  | 21.78093 | 0.002134882 | Credible Set | purple |
| chr19:21781005 | 19  | 21.78101 | 0.005043833 | Credible Set | purple |
| chr19:21781019 | 19  | 21.78102 | 0.004855973 | Credible Set | purple |
| chr19:21798450 | 19  | 21.79845 | 0.011913874 | Credible Set | purple |
| chr19:21798541 | 19  | 21.79854 | 0.005838403 | Credible Set | purple |
| chr19:21803806 | 19  | 21.80381 | 0.001393950 | Credible Set | purple |
| chr19:21803819 | 19  | 21.80382 | 0.001362329 | Credible Set | purple |
| chr19:21803853 | 19  | 21.80385 | 0.001388858 | Credible Set | purple |
| chr19:21803859 | 19  | 21.80386 | 0.001390581 | Credible Set | purple |
| chr19:21804356 | 19  | 21.80436 | 0.012053895 | Credible Set | purple |

## Fine-mapping Regions

| snp            | chr | pos (Mb) | pp          | group        | color  |
|----------------|-----|----------|-------------|--------------|--------|
| chr19:21804420 | 19  | 21.80442 | 0.013442321 | Credible Set | purple |
| chr19:21804582 | 19  | 21.80458 | 0.013518135 | Credible Set | purple |
| chr19:21812258 | 19  | 21.81226 | 0.015579607 | Credible Set | purple |
| chr19:21812298 | 19  | 21.81230 | 0.015638761 | Credible Set | purple |
| chr19:21812594 | 19  | 21.81259 | 0.017218328 | Credible Set | purple |
| chr19:21814790 | 19  | 21.81479 | 0.017124033 | Credible Set | purple |
| chr19:21814806 | 19  | 21.81481 | 0.017236345 | Credible Set | purple |
| chr19:21851795 | 19  | 21.85179 | 0.009981769 | Credible Set | purple |
| chr19:21852236 | 19  | 21.85224 | 0.011199702 | Credible Set | purple |
| chr19:21852273 | 19  | 21.85227 | 0.010492163 | Credible Set | purple |
| chr19:21852296 | 19  | 21.85230 | 0.007290938 | Credible Set | purple |
| chr19:21857059 | 19  | 21.85706 | 0.011777903 | Credible Set | purple |
| chr19:21857128 | 19  | 21.85713 | 0.011292658 | Credible Set | purple |
| chr19:21857704 | 19  | 21.85770 | 0.015183882 | Credible Set | purple |
| chr19:21857707 | 19  | 21.85771 | 0.014478042 | Credible Set | purple |
| chr19:21880097 | 19  | 21.88010 | 0.014906049 | Credible Set | purple |
| chr19:21889764 | 19  | 21.88976 | 0.011703019 | Credible Set | purple |
| chr19:21889768 | 19  | 21.88977 | 0.011733833 | Credible Set | purple |
| chr19:21889777 | 19  | 21.88978 | 0.011703019 | Credible Set | purple |
| chr19:21889831 | 19  | 21.88983 | 0.011723340 | Credible Set | purple |
| chr19:21889832 | 19  | 21.88983 | 0.011730755 | Credible Set | purple |
| chr19:21889838 | 19  | 21.88984 | 0.011882834 | Credible Set | purple |
| chr19:21895163 | 19  | 21.89516 | 0.023703299 | Credible Set | purple |
| chr19:21895174 | 19  | 21.89517 | 0.043781690 | Credible Set | purple |
| chr19:22070939 | 19  | 22.07094 | 0.004872101 | Credible Set | purple |
| chr19:22073618 | 19  | 22.07362 | 0.003957677 | Credible Set | purple |
| chr19:22113626 | 19  | 22.11363 | 0.003856117 | Credible Set | purple |
| chr19:22113628 | 19  | 22.11363 | 0.003806433 | Credible Set | purple |
| chr19:22113687 | 19  | 22.11369 | 0.003804155 | Credible Set | purple |

# F34 GBS, routine CBC red blood cell count

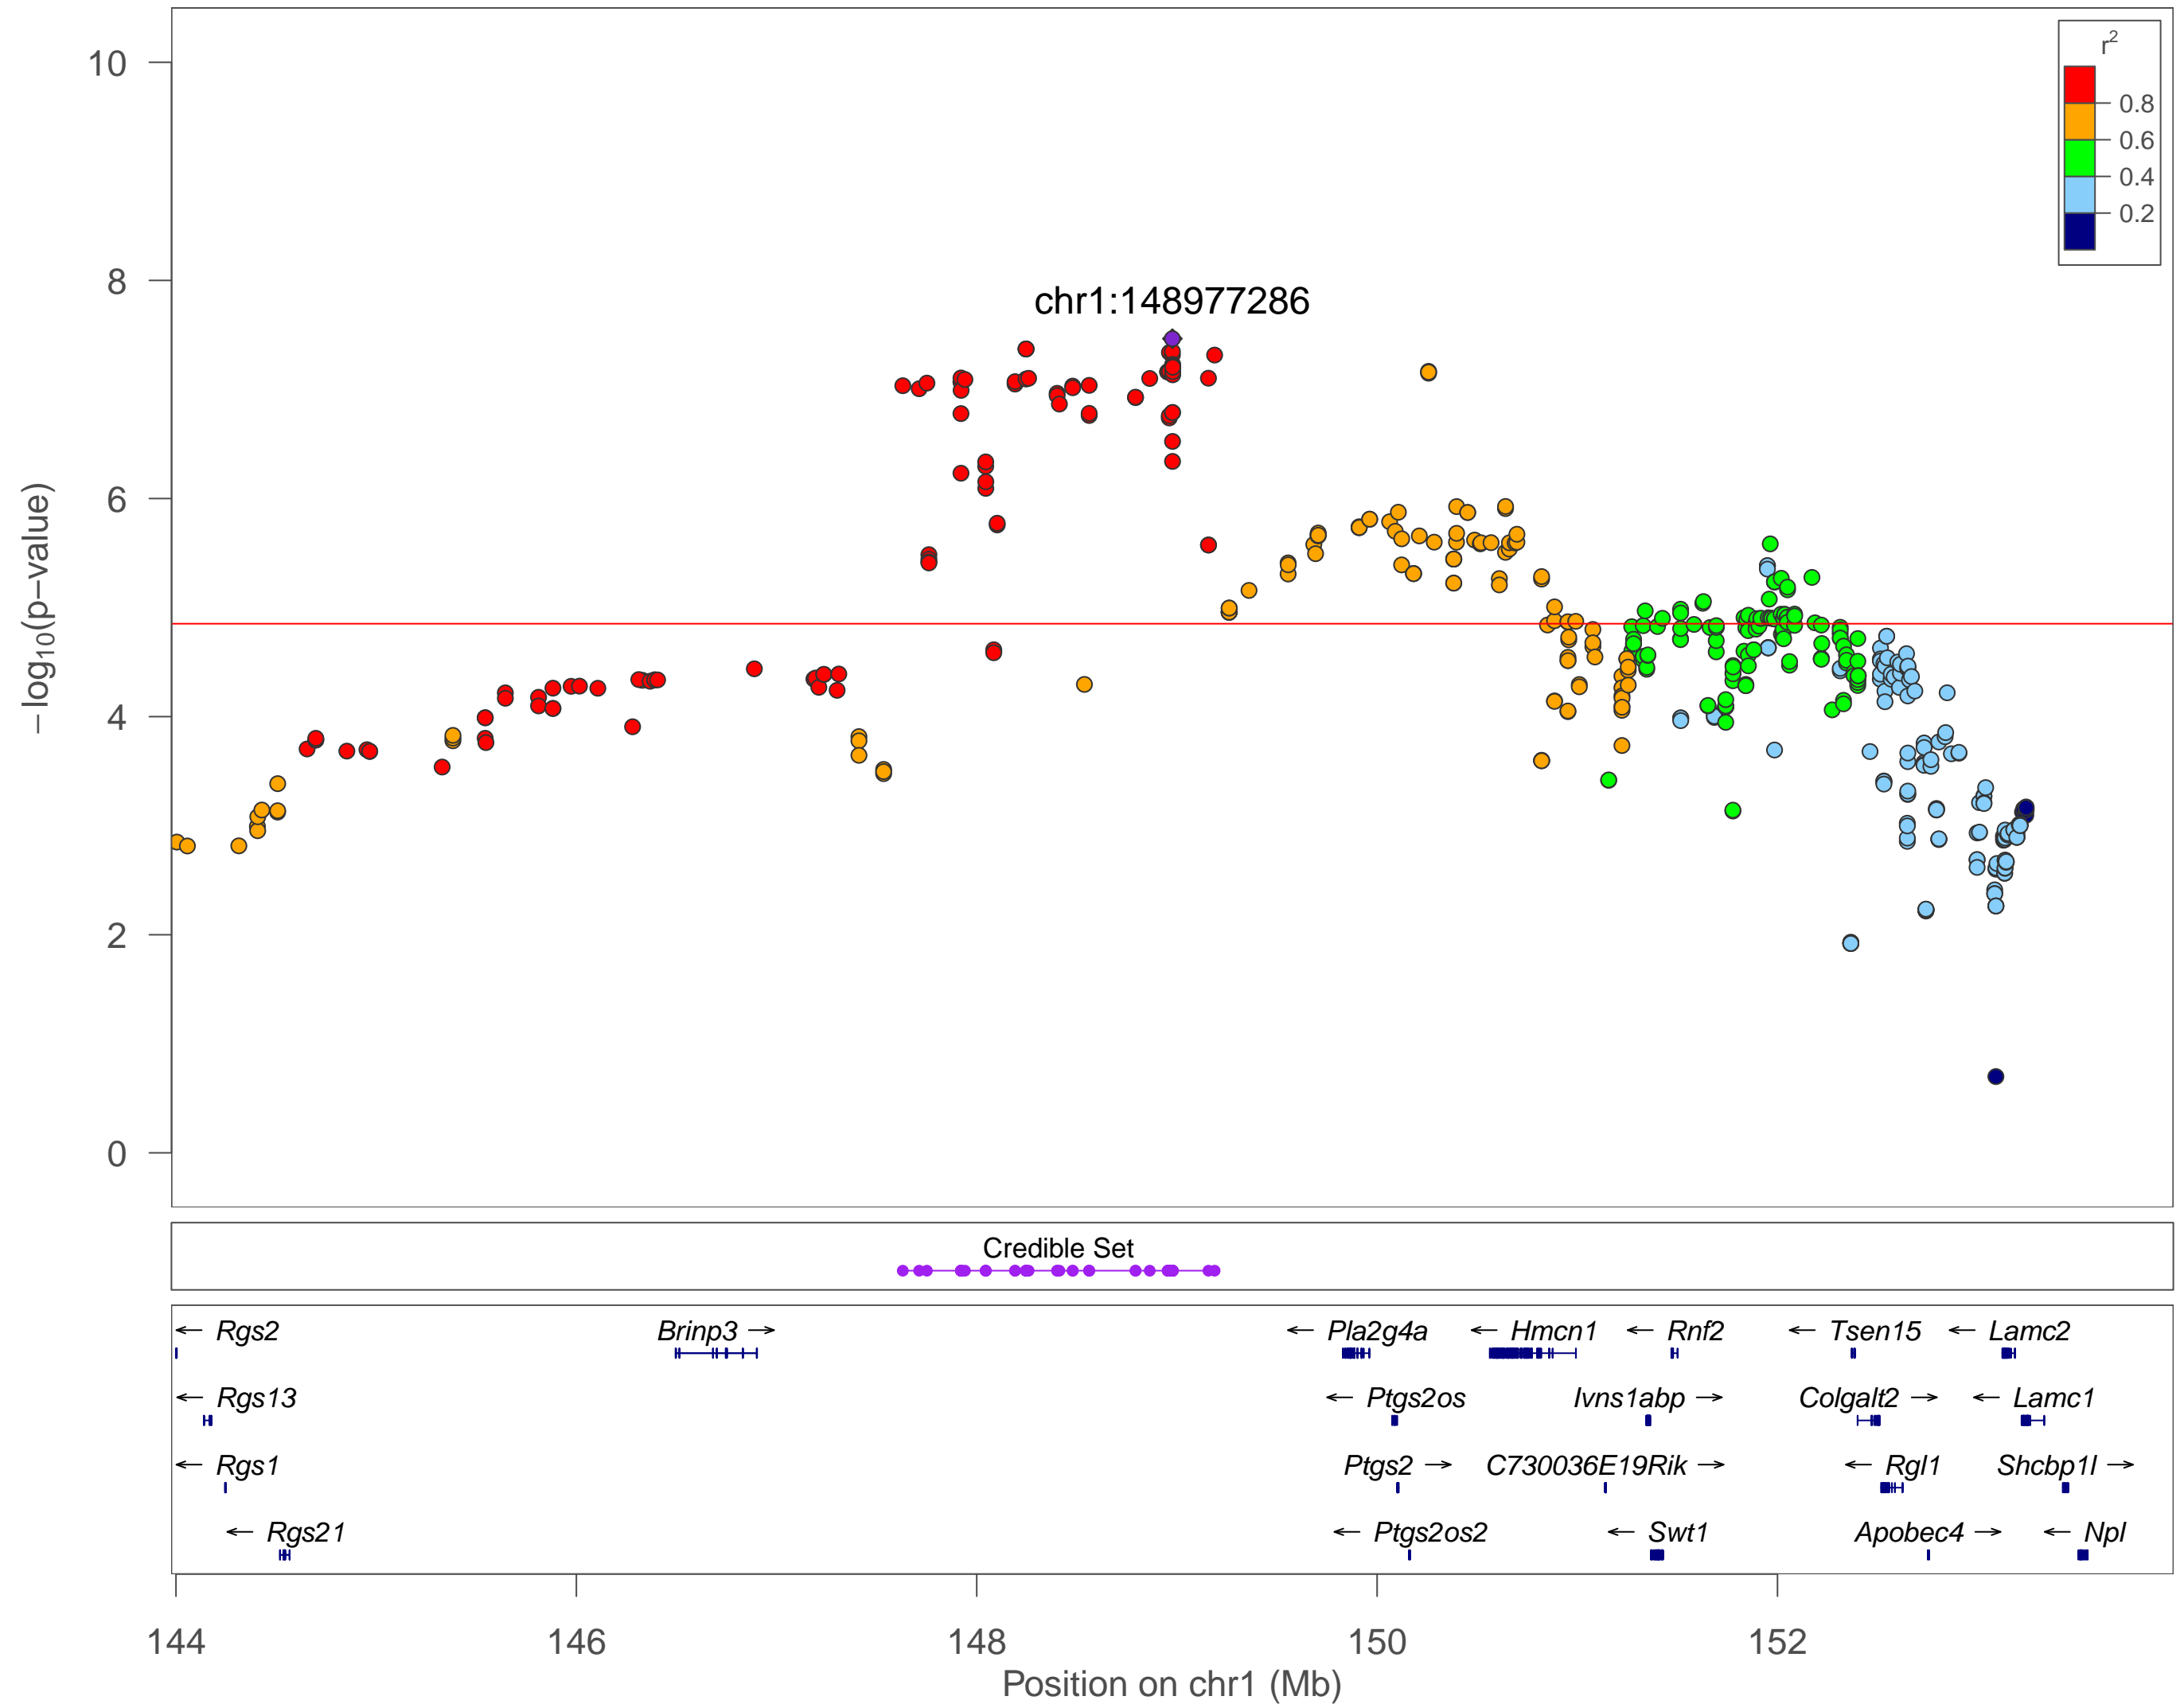

date: Thu Oct 25 17:03:27 2018

build: F34GBS

display range: chr1:143977286–153977286 [143977286–153977286]

hilite range: 0 – 0 [ 0 – 0 ]

reference SNP: chr1:148977286

number of SNPs plotted: 507

min P-value: 3.42E–8 [chr1:148977286]

max P-value: 2E–1 [chr1:153090942]

omitted Genes: Rgs18, Pdc, 2310030A07Rik

omitted Genes: BC003331, Tpr, Prg4

omitted Genes: Trmt1l, Mir7682, Fam129a

omitted Genes: Edem3, 1700025G04Rik, Arpc5

omitted Genes: Ncf2, Smg7, Nmnat2

omitted Genes: E330020D12Rik, Dhx9, Rgs8

omitted Genes: C230024C17Rik, Rgs16, Rnasel

omitted Genes: Rgs11, Teddm2, Teddm1b

omitted Genes: Teddm1a, Mir8114, Glul



## Fine-mapping Regions

| snp            | chr | pos (Mb) | pp          | group        | color  |
|----------------|-----|----------|-------------|--------------|--------|
| chr1:147630646 | 1   | 147.6306 | 0.016770111 | Credible Set | purple |
| chr1:147712367 | 1   | 147.7124 | 0.015760618 | Credible Set | purple |
| chr1:147751084 | 1   | 147.7511 | 0.017691123 | Credible Set | purple |
| chr1:147921174 | 1   | 147.9212 | 0.009486611 | Credible Set | purple |
| chr1:147921280 | 1   | 147.9213 | 0.002813986 | Credible Set | purple |
| chr1:147921379 | 1   | 147.9214 | 0.018112685 | Credible Set | purple |
| chr1:147921380 | 1   | 147.9214 | 0.018157020 | Credible Set | purple |
| chr1:147921465 | 1   | 147.9215 | 0.019651103 | Credible Set | purple |
| chr1:147921979 | 1   | 147.9220 | 0.015252863 | Credible Set | purple |
| chr1:147940897 | 1   | 147.9409 | 0.019030575 | Credible Set | purple |
| chr1:148044707 | 1   | 148.0447 | 0.003235533 | Credible Set | purple |
| chr1:148044765 | 1   | 148.0448 | 0.003542318 | Credible Set | purple |
| chr1:148045260 | 1   | 148.0453 | 0.002364531 | Credible Set | purple |
| chr1:148191398 | 1   | 148.1914 | 0.017338943 | Credible Set | purple |
| chr1:148191461 | 1   | 148.1915 | 0.018222125 | Credible Set | purple |
| chr1:148246268 | 1   | 148.2463 | 0.035525322 | Credible Set | purple |
| chr1:148246270 | 1   | 148.2463 | 0.035553321 | Credible Set | purple |
| chr1:148246308 | 1   | 148.2463 | 0.035553321 | Credible Set | purple |
| chr1:148246370 | 1   | 148.2464 | 0.019228793 | Credible Set | purple |
| chr1:148259002 | 1   | 148.2590 | 0.019519378 | Credible Set | purple |
| chr1:148401594 | 1   | 148.4016 | 0.014359338 | Credible Set | purple |
| chr1:148401658 | 1   | 148.4017 | 0.013724217 | Credible Set | purple |
| chr1:148412829 | 1   | 148.4128 | 0.011526073 | Credible Set | purple |
| chr1:148479166 | 1   | 148.4792 | 0.016637040 | Credible Set | purple |
| chr1:148479488 | 1   | 148.4795 | 0.016101327 | Credible Set | purple |
| chr1:148561626 | 1   | 148.5616 | 0.016884578 | Credible Set | purple |
| chr1:148561643 | 1   | 148.5616 | 0.009132927 | Credible Set | purple |
| chr1:148561679 | 1   | 148.5617 | 0.009533432 | Credible Set | purple |
| chr1:148793161 | 1   | 148.7932 | 0.013149282 | Credible Set | purple |
| chr1:148793216 | 1   | 148.7932 | 0.013271295 | Credible Set | purple |
| chr1:148864191 | 1   | 148.8642 | 0.019448661 | Credible Set | purple |
| chr1:148954162 | 1   | 148.9542 | 0.022275747 | Credible Set | purple |
| chr1:148954168 | 1   | 148.9542 | 0.022275747 | Credible Set | purple |
| chr1:148954207 | 1   | 148.9542 | 0.022275747 | Credible Set | purple |
| chr1:148961834 | 1   | 148.9618 | 0.008683184 | Credible Set | purple |
| chr1:148961852 | 1   | 148.9619 | 0.009084529 | Credible Set | purple |

Fine-mapping Regions

| snp            | chr | pos (Mb) | pp          | group        | color  |
|----------------|-----|----------|-------------|--------------|--------|
| chr1:148962391 | 1   | 148.9624 | 0.022799495 | Credible Set | purple |
| chr1:148962448 | 1   | 148.9624 | 0.022489334 | Credible Set | purple |
| chr1:148962557 | 1   | 148.9626 | 0.033096424 | Credible Set | purple |
| chr1:148977255 | 1   | 148.9773 | 0.031479271 | Credible Set | purple |
| chr1:148977279 | 1   | 148.9773 | 0.033707946 | Credible Set | purple |
| chr1:148977286 | 1   | 148.9773 | 0.043873858 | Credible Set | purple |
| chr1:148977945 | 1   | 148.9779 | 0.009703785 | Credible Set | purple |
| chr1:148977976 | 1   | 148.9780 | 0.009699202 | Credible Set | purple |
| chr1:148977977 | 1   | 148.9780 | 0.003578461 | Credible Set | purple |
| chr1:148977984 | 1   | 148.9780 | 0.005377246 | Credible Set | purple |
| chr1:148978648 | 1   | 148.9786 | 0.025925582 | Credible Set | purple |
| chr1:148978689 | 1   | 148.9787 | 0.025159514 | Credible Set | purple |
| chr1:148978796 | 1   | 148.9788 | 0.024447543 | Credible Set | purple |
| chr1:148978842 | 1   | 148.9788 | 0.020973256 | Credible Set | purple |
| chr1:148978923 | 1   | 148.9789 | 0.022403352 | Credible Set | purple |
| chr1:148979220 | 1   | 148.9792 | 0.024483940 | Credible Set | purple |
| chr1:149157510 | 1   | 149.1575 | 0.019554960 | Credible Set | purple |
| chr1:149188240 | 1   | 149.1882 | 0.031394233 | Credible Set | purple |

F34 GBS, routine CBC red blood cell count

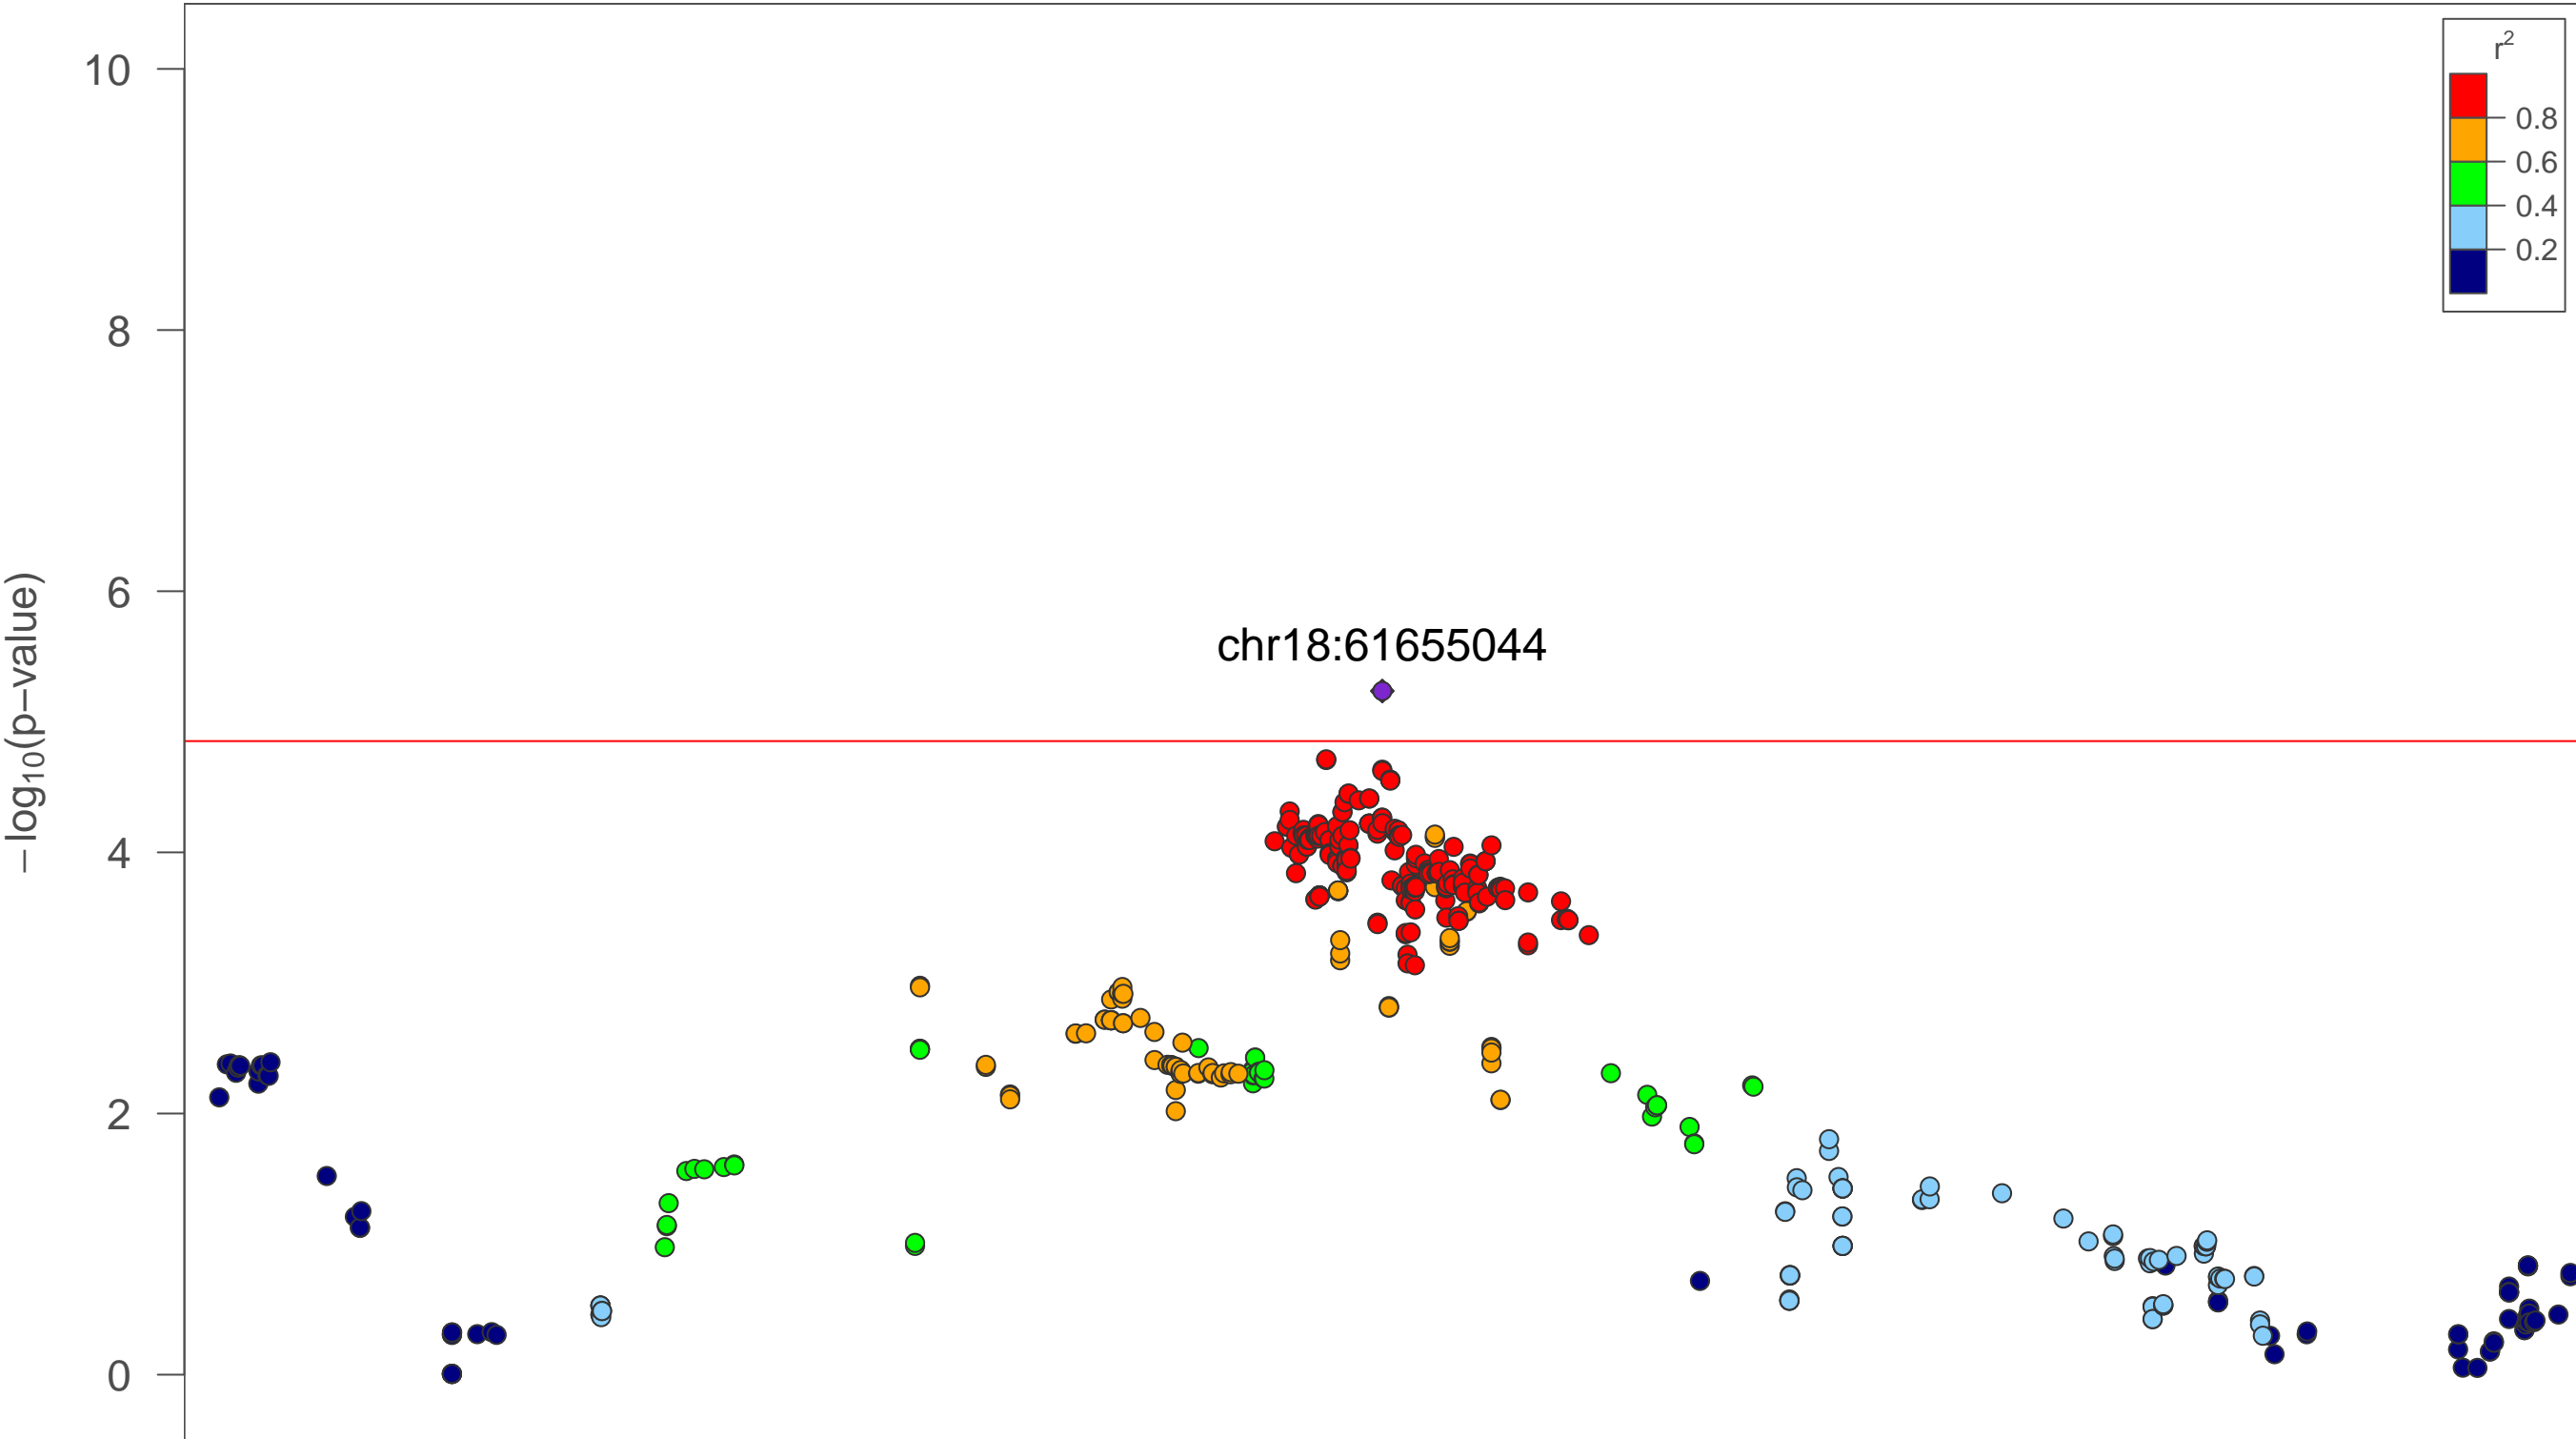

Credible Set

Genes and their orientations (indicated by arrows) are listed below the plot, corresponding to the genomic region shown. The genes are arranged in four rows, with their positions relative to the x-axis (Mb) indicated by vertical lines and arrows.

Row 1: *Lmnb1* →, *Slc12a2* →, *Isoc1* →, *Mir6355* →, *Iigp1* →, *Cdx1* ←, *Bvht* →, *Htr4* →, *Napg* →, *Txn1l* ←, *Fech* ←, *Mir122* →, *Grp* →

Row 2: *March3* ←, *Fbn2* ←, *Adamts19* →, *Gm4951* →, *Arsi* →, *Carmn* ←, *Fbxo38* ←, *Wdr7* →, *Nars* ←, *Alpk2* ←, *Rax* ←

Row 3: *Gm10536* →, *Slc27a6* →, *Gm4841* ←, *Pdgfrb* →, *Ablim3* ←, *Spink7* ←, *St8sia3os* ←, *Nedd4l* →, *Sec11c* →

Row 4: *C330018D20Rik* ←, *A730017C20Rik* →, *Smim3* ←, *Pde6a* →, *Sh3tc2* →, *Apcdd1* →, *St8sia3* →, *Malt1* →, *Ccbe1* ←

53 genes  
omitted

date: Thu Oct 25 17:03:38 2018  
build: F34GBS  
display range: chr18:56655044–66655044 [56655044–66655044]  
hilite range: 0 – 0 [ 0 – 0 ]  
reference SNP: chr18:61655044  
number of SNPs plotted: 476  
min P-value: 5.81E–6 [chr18:61655044]  
max P-value: 9.88E–1 [chr18:57772170]  
omitted Genes: Megf10, Prrc1, Ctxn3  
omitted Genes: 1700066O22Rik, 1700011I03Rik, 4930511M06Rik  
omitted Genes: 2210409D07Rik, Chsy3, F830016B08Rik  
omitted Genes: Dctn4, Rbm22, Myoz3  
omitted Genes: Synpo, G630071F17Rik, Ndst1  
omitted Genes: Rps14, Cd74, Mir5107  
omitted Genes: Tcof1, Camk2a, Mir7220  
omitted Genes: Mir6982, Slc6a7, Csf1r  
omitted Genes: Mir6983, Hmgxb3, Slc26a2  
omitted Genes: Ppargc1b, Mir378a, A530050N04Rik  
omitted Genes: Arhgef37, Csnk1a1, Mir145a  
omitted Genes: Mir143, Il17b, Pcyox1l  
omitted Genes: Grpel2, 1500015A07Rik, Afap1l1  
omitted Genes: Adrb2, Spink10, Spink13  
omitted Genes: 2700046A07Rik, Piezo2, Onecut2  
omitted Genes: Atp8b1, Zfp532, Oacyl  
omitted Genes: Cplx4, Lman1, Mir694  
omitted Genes: Pmaip1, Gm9926

## Fine-mapping Regions

| snp            | chr | pos (Mb) | pp          | group        | color  |
|----------------|-----|----------|-------------|--------------|--------|
| chr18:61205705 | 18  | 61.20571 | 0.005448370 | Credible Set | purple |
| chr18:61257201 | 18  | 61.25720 | 0.006945231 | Credible Set | purple |
| chr18:61257377 | 18  | 61.25738 | 0.006966032 | Credible Set | purple |
| chr18:61268578 | 18  | 61.26858 | 0.008962725 | Credible Set | purple |
| chr18:61268584 | 18  | 61.26858 | 0.007777763 | Credible Set | purple |
| chr18:61275165 | 18  | 61.27517 | 0.004888103 | Credible Set | purple |
| chr18:61294899 | 18  | 61.29490 | 0.003202445 | Credible Set | purple |
| chr18:61295744 | 18  | 61.29574 | 0.005984639 | Credible Set | purple |
| chr18:61307248 | 18  | 61.30725 | 0.004362501 | Credible Set | purple |
| chr18:61307278 | 18  | 61.30728 | 0.004369899 | Credible Set | purple |
| chr18:61322420 | 18  | 61.32242 | 0.006295605 | Credible Set | purple |
| chr18:61325885 | 18  | 61.32588 | 0.005969946 | Credible Set | purple |
| chr18:61325983 | 18  | 61.32598 | 0.006591703 | Credible Set | purple |
| chr18:61326493 | 18  | 61.32649 | 0.006001677 | Credible Set | purple |
| chr18:61326662 | 18  | 61.32666 | 0.005943314 | Credible Set | purple |
| chr18:61326689 | 18  | 61.32669 | 0.005943314 | Credible Set | purple |
| chr18:61336840 | 18  | 61.33684 | 0.005959787 | Credible Set | purple |
| chr18:61340720 | 18  | 61.34072 | 0.004978988 | Credible Set | purple |
| chr18:61340729 | 18  | 61.34073 | 0.004985735 | Credible Set | purple |
| chr18:61344728 | 18  | 61.34473 | 0.005558116 | Credible Set | purple |
| chr18:61351043 | 18  | 61.35104 | 0.005735564 | Credible Set | purple |
| chr18:61351491 | 18  | 61.35149 | 0.005563928 | Credible Set | purple |
| chr18:61376042 | 18  | 61.37604 | 0.002083723 | Credible Set | purple |
| chr18:61376045 | 18  | 61.37604 | 0.002067396 | Credible Set | purple |
| chr18:61376483 | 18  | 61.37648 | 0.006195200 | Credible Set | purple |
| chr18:61376688 | 18  | 61.37669 | 0.005969946 | Credible Set | purple |
| chr18:61376841 | 18  | 61.37684 | 0.005969946 | Credible Set | purple |
| chr18:61376921 | 18  | 61.37692 | 0.005969946 | Credible Set | purple |
| chr18:61382329 | 18  | 61.38233 | 0.006741293 | Credible Set | purple |
| chr18:61382496 | 18  | 61.38250 | 0.005969946 | Credible Set | purple |
| chr18:61386134 | 18  | 61.38613 | 0.005697101 | Credible Set | purple |
| chr18:61386274 | 18  | 61.38627 | 0.005969946 | Credible Set | purple |
| chr18:61388160 | 18  | 61.38816 | 0.006259177 | Credible Set | purple |
| chr18:61388169 | 18  | 61.38817 | 0.007260709 | Credible Set | purple |
| chr18:61388197 | 18  | 61.38820 | 0.007148277 | Credible Set | purple |
| chr18:61389384 | 18  | 61.38938 | 0.005988841 | Credible Set | purple |

## Fine-mapping Regions

| snp            | chr | pos (Mb) | pp          | group        | color  |
|----------------|-----|----------|-------------|--------------|--------|
| chr18:61392736 | 18  | 61.39274 | 0.002216639 | Credible Set | purple |
| chr18:61392737 | 18  | 61.39274 | 0.002216639 | Credible Set | purple |
| chr18:61392782 | 18  | 61.39278 | 0.002216639 | Credible Set | purple |
| chr18:61392828 | 18  | 61.39283 | 0.002171816 | Credible Set | purple |
| chr18:61392844 | 18  | 61.39284 | 0.002171816 | Credible Set | purple |
| chr18:61400213 | 18  | 61.40021 | 0.005969946 | Credible Set | purple |
| chr18:61415978 | 18  | 61.41598 | 0.006348102 | Credible Set | purple |
| chr18:61421022 | 18  | 61.42102 | 0.021218291 | Credible Set | purple |
| chr18:61421081 | 18  | 61.42108 | 0.021462381 | Credible Set | purple |
| chr18:61434374 | 18  | 61.43437 | 0.005567321 | Credible Set | purple |
| chr18:61435019 | 18  | 61.43502 | 0.004474155 | Credible Set | purple |
| chr18:61435052 | 18  | 61.43505 | 0.004336106 | Credible Set | purple |
| chr18:61466355 | 18  | 61.46636 | 0.007011180 | Credible Set | purple |
| chr18:61466435 | 18  | 61.46643 | 0.004066953 | Credible Set | purple |
| chr18:61466477 | 18  | 61.46648 | 0.004009173 | Credible Set | purple |
| chr18:61466745 | 18  | 61.46675 | 0.003794946 | Credible Set | purple |
| chr18:61475793 | 18  | 61.47579 | 0.005003903 | Credible Set | purple |
| chr18:61475799 | 18  | 61.47580 | 0.005003903 | Credible Set | purple |
| chr18:61475844 | 18  | 61.47584 | 0.005582395 | Credible Set | purple |
| chr18:61488563 | 18  | 61.48856 | 0.003606624 | Credible Set | purple |
| chr18:61488568 | 18  | 61.48857 | 0.003606624 | Credible Set | purple |
| chr18:61488569 | 18  | 61.48857 | 0.003606624 | Credible Set | purple |
| chr18:61488585 | 18  | 61.48859 | 0.005969946 | Credible Set | purple |
| chr18:61488640 | 18  | 61.48864 | 0.008877543 | Credible Set | purple |
| chr18:61488644 | 18  | 61.48864 | 0.008877543 | Credible Set | purple |
| chr18:61497425 | 18  | 61.49742 | 0.010461353 | Credible Set | purple |
| chr18:61502586 | 18  | 61.50259 | 0.004116200 | Credible Set | purple |
| chr18:61505684 | 18  | 61.50568 | 0.003667400 | Credible Set | purple |
| chr18:61505787 | 18  | 61.50579 | 0.003694007 | Credible Set | purple |
| chr18:61506314 | 18  | 61.50631 | 0.004005741 | Credible Set | purple |
| chr18:61506364 | 18  | 61.50636 | 0.003249537 | Credible Set | purple |
| chr18:61506393 | 18  | 61.50639 | 0.003338023 | Credible Set | purple |
| chr18:61513675 | 18  | 61.51367 | 0.005053807 | Credible Set | purple |
| chr18:61513686 | 18  | 61.51369 | 0.005121434 | Credible Set | purple |
| chr18:61514087 | 18  | 61.51409 | 0.012051866 | Credible Set | purple |
| chr18:61514093 | 18  | 61.51409 | 0.012088210 | Credible Set | purple |

## Fine-mapping Regions

| snp            | chr | pos (Mb) | pp          | group        | color  |
|----------------|-----|----------|-------------|--------------|--------|
| chr18:61518663 | 18  | 61.51866 | 0.006551351 | Credible Set | purple |
| chr18:61522253 | 18  | 61.52225 | 0.004134208 | Credible Set | purple |
| chr18:61522261 | 18  | 61.52226 | 0.004081616 | Credible Set | purple |
| chr18:61556863 | 18  | 61.55686 | 0.010791463 | Credible Set | purple |
| chr18:61600372 | 18  | 61.60037 | 0.007326827 | Credible Set | purple |
| chr18:61600381 | 18  | 61.60038 | 0.007297248 | Credible Set | purple |
| chr18:61600401 | 18  | 61.60040 | 0.007302610 | Credible Set | purple |
| chr18:61600428 | 18  | 61.60043 | 0.007315662 | Credible Set | purple |
| chr18:61600547 | 18  | 61.60055 | 0.011113437 | Credible Set | purple |
| chr18:61600608 | 18  | 61.60061 | 0.011132748 | Credible Set | purple |
| chr18:61634745 | 18  | 61.63475 | 0.006181847 | Credible Set | purple |
| chr18:61634869 | 18  | 61.63487 | 0.006592431 | Credible Set | purple |
| chr18:61635121 | 18  | 61.63512 | 0.001412198 | Credible Set | purple |
| chr18:61635169 | 18  | 61.63517 | 0.001379070 | Credible Set | purple |
| chr18:61653762 | 18  | 61.65376 | 0.008072224 | Credible Set | purple |
| chr18:61654922 | 18  | 61.65492 | 0.008071189 | Credible Set | purple |
| chr18:61654978 | 18  | 61.65498 | 0.018033908 | Credible Set | purple |
| chr18:61655005 | 18  | 61.65501 | 0.017658601 | Credible Set | purple |
| chr18:61655044 | 18  | 61.65504 | 0.067766511 | Credible Set | purple |
| chr18:61655445 | 18  | 61.65545 | 0.007365164 | Credible Set | purple |
| chr18:61688361 | 18  | 61.68836 | 0.015176045 | Credible Set | purple |
| chr18:61688363 | 18  | 61.68836 | 0.015252225 | Credible Set | purple |
| chr18:61688400 | 18  | 61.68840 | 0.015014264 | Credible Set | purple |
| chr18:61693349 | 18  | 61.69335 | 0.002842604 | Credible Set | purple |
| chr18:61706715 | 18  | 61.70672 | 0.004681497 | Credible Set | purple |
| chr18:61707062 | 18  | 61.70706 | 0.006397523 | Credible Set | purple |
| chr18:61707121 | 18  | 61.70712 | 0.006710377 | Credible Set | purple |
| chr18:61722238 | 18  | 61.72224 | 0.006544158 | Credible Set | purple |
| chr18:61722262 | 18  | 61.72226 | 0.005921844 | Credible Set | purple |
| chr18:61726167 | 18  | 61.72617 | 0.005999756 | Credible Set | purple |
| chr18:61726194 | 18  | 61.72619 | 0.006024756 | Credible Set | purple |
| chr18:61726206 | 18  | 61.72621 | 0.005999756 | Credible Set | purple |
| chr18:61726239 | 18  | 61.72624 | 0.005859850 | Credible Set | purple |
| chr18:61737597 | 18  | 61.73760 | 0.002605931 | Credible Set | purple |
| chr18:61737612 | 18  | 61.73761 | 0.002596645 | Credible Set | purple |
| chr18:61737626 | 18  | 61.73763 | 0.002587908 | Credible Set | purple |

## Fine-mapping Regions

| snp            | chr | pos (Mb) | pp          | group        | color  |
|----------------|-----|----------|-------------|--------------|--------|
| chr18:61737739 | 18  | 61.73774 | 0.006042115 | Credible Set | purple |
| chr18:61752870 | 18  | 61.75287 | 0.002491824 | Credible Set | purple |
| chr18:61752916 | 18  | 61.75292 | 0.002042854 | Credible Set | purple |
| chr18:61766474 | 18  | 61.76647 | 0.003275071 | Credible Set | purple |
| chr18:61773121 | 18  | 61.77312 | 0.002695951 | Credible Set | purple |
| chr18:61773529 | 18  | 61.77353 | 0.002488509 | Credible Set | purple |
| chr18:61773667 | 18  | 61.77367 | 0.001992165 | Credible Set | purple |
| chr18:61773688 | 18  | 61.77369 | 0.001957495 | Credible Set | purple |
| chr18:61773748 | 18  | 61.77375 | 0.001957495 | Credible Set | purple |
| chr18:61774150 | 18  | 61.77415 | 0.002437604 | Credible Set | purple |
| chr18:61774277 | 18  | 61.77428 | 0.002469121 | Credible Set | purple |
| chr18:61785401 | 18  | 61.78540 | 0.002463153 | Credible Set | purple |
| chr18:61785450 | 18  | 61.78545 | 0.002451525 | Credible Set | purple |
| chr18:61785465 | 18  | 61.78547 | 0.002445143 | Credible Set | purple |
| chr18:61786082 | 18  | 61.78608 | 0.002443676 | Credible Set | purple |
| chr18:61786403 | 18  | 61.78640 | 0.002551589 | Credible Set | purple |
| chr18:61790408 | 18  | 61.79041 | 0.002564550 | Credible Set | purple |
| chr18:61790488 | 18  | 61.79049 | 0.002364411 | Credible Set | purple |
| chr18:61791422 | 18  | 61.79142 | 0.002508820 | Credible Set | purple |
| chr18:61792239 | 18  | 61.79224 | 0.001755982 | Credible Set | purple |
| chr18:61792326 | 18  | 61.79233 | 0.002617102 | Credible Set | purple |
| chr18:61795073 | 18  | 61.79507 | 0.003692253 | Credible Set | purple |
| chr18:61795217 | 18  | 61.79522 | 0.002538919 | Credible Set | purple |
| chr18:61795218 | 18  | 61.79522 | 0.002538919 | Credible Set | purple |
| chr18:61795225 | 18  | 61.79523 | 0.002538919 | Credible Set | purple |
| chr18:61795296 | 18  | 61.79530 | 0.004117110 | Credible Set | purple |
| chr18:61795298 | 18  | 61.79530 | 0.004350738 | Credible Set | purple |
| chr18:61832086 | 18  | 61.83209 | 0.003770205 | Credible Set | purple |
| chr18:61847573 | 18  | 61.84757 | 0.003388558 | Credible Set | purple |
| chr18:61847582 | 18  | 61.84758 | 0.003248936 | Credible Set | purple |
| chr18:61847690 | 18  | 61.84769 | 0.003151108 | Credible Set | purple |
| chr18:61858191 | 18  | 61.85819 | 0.003184572 | Credible Set | purple |
| chr18:61882775 | 18  | 61.88278 | 0.003208489 | Credible Set | purple |
| chr18:61882784 | 18  | 61.88278 | 0.003204335 | Credible Set | purple |
| chr18:61882815 | 18  | 61.88282 | 0.003204335 | Credible Set | purple |
| chr18:61882830 | 18  | 61.88283 | 0.003204335 | Credible Set | purple |



## Fine-mapping Regions

| snp            | chr | pos (Mb) | pp          | group        | color  |
|----------------|-----|----------|-------------|--------------|--------|
| chr18:61890944 | 18  | 61.89094 | 0.004054650 | Credible Set | purple |
| chr18:61891389 | 18  | 61.89139 | 0.003143261 | Credible Set | purple |
| chr18:61891400 | 18  | 61.89140 | 0.003273676 | Credible Set | purple |
| chr18:61917922 | 18  | 61.91792 | 0.002036727 | Credible Set | purple |
| chr18:61921624 | 18  | 61.92162 | 0.002492555 | Credible Set | purple |
| chr18:61921661 | 18  | 61.92166 | 0.002604104 | Credible Set | purple |
| chr18:61921694 | 18  | 61.92169 | 0.002562519 | Credible Set | purple |
| chr18:61922273 | 18  | 61.92227 | 0.001533529 | Credible Set | purple |
| chr18:61927547 | 18  | 61.92755 | 0.002698341 | Credible Set | purple |
| chr18:61936945 | 18  | 61.93695 | 0.003369307 | Credible Set | purple |
| chr18:61949121 | 18  | 61.94912 | 0.002893394 | Credible Set | purple |
| chr18:61952249 | 18  | 61.95225 | 0.002664253 | Credible Set | purple |
| chr18:61952524 | 18  | 61.95252 | 0.002634229 | Credible Set | purple |
| chr18:61952649 | 18  | 61.95265 | 0.004964955 | Credible Set | purple |
| chr18:61971767 | 18  | 61.97177 | 0.001571504 | Credible Set | purple |
| chr18:61973442 | 18  | 61.97344 | 0.001457635 | Credible Set | purple |
| chr18:61973478 | 18  | 61.97348 | 0.001453488 | Credible Set | purple |
| chr18:61991352 | 18  | 61.99135 | 0.002582605 | Credible Set | purple |
| chr18:61991384 | 18  | 61.99138 | 0.002590106 | Credible Set | purple |
| chr18:61992210 | 18  | 61.99221 | 0.002947759 | Credible Set | purple |
| chr18:61992519 | 18  | 61.99252 | 0.002740291 | Credible Set | purple |
| chr18:61999716 | 18  | 61.99972 | 0.002319199 | Credible Set | purple |
| chr18:62021643 | 18  | 62.02164 | 0.003763327 | Credible Set | purple |
| chr18:62021683 | 18  | 62.02168 | 0.003719783 | Credible Set | purple |
| chr18:62022099 | 18  | 62.02210 | 0.003465092 | Credible Set | purple |
| chr18:62051825 | 18  | 62.05183 | 0.002490355 | Credible Set | purple |
| chr18:62051845 | 18  | 62.05185 | 0.002321060 | Credible Set | purple |
| chr18:62055840 | 18  | 62.05584 | 0.003121373 | Credible Set | purple |
| chr18:62055876 | 18  | 62.05588 | 0.003121373 | Credible Set | purple |
| chr18:62055905 | 18  | 62.05591 | 0.003106380 | Credible Set | purple |
| chr18:62059126 | 18  | 62.05913 | 0.001941320 | Credible Set | purple |
| chr18:62059178 | 18  | 62.05918 | 0.001973137 | Credible Set | purple |
| chr18:62085794 | 18  | 62.08579 | 0.003906365 | Credible Set | purple |
| chr18:62085799 | 18  | 62.08580 | 0.003906365 | Credible Set | purple |
| chr18:62085840 | 18  | 62.08584 | 0.003906365 | Credible Set | purple |
| chr18:62092239 | 18  | 62.09224 | 0.002169119 | Credible Set | purple |

Fine-mapping Regions

| snp            | chr | pos (Mb) | pp          | group        | color  |
|----------------|-----|----------|-------------|--------------|--------|
| chr18:62110682 | 18  | 62.11068 | 0.005086505 | Credible Set | purple |
| chr18:62137890 | 18  | 62.13789 | 0.002512666 | Credible Set | purple |
| chr18:62137914 | 18  | 62.13791 | 0.002512666 | Credible Set | purple |
| chr18:62147016 | 18  | 62.14702 | 0.002558800 | Credible Set | purple |
| chr18:62148467 | 18  | 62.14847 | 0.002515514 | Credible Set | purple |
| chr18:62151389 | 18  | 62.15139 | 0.002438614 | Credible Set | purple |
| chr18:62167241 | 18  | 62.16724 | 0.002489034 | Credible Set | purple |
| chr18:62167915 | 18  | 62.16792 | 0.002047695 | Credible Set | purple |
| chr18:62263390 | 18  | 62.26339 | 0.002328210 | Credible Set | purple |
| chr18:62400951 | 18  | 62.40095 | 0.002008048 | Credible Set | purple |
| chr18:62401009 | 18  | 62.40101 | 0.001472867 | Credible Set | purple |
| chr18:62425156 | 18  | 62.42516 | 0.001508041 | Credible Set | purple |
| chr18:62431611 | 18  | 62.43161 | 0.001468718 | Credible Set | purple |
| chr18:62431828 | 18  | 62.43183 | 0.001476917 | Credible Set | purple |

# F34 GBS, routine CBC hemoglobin

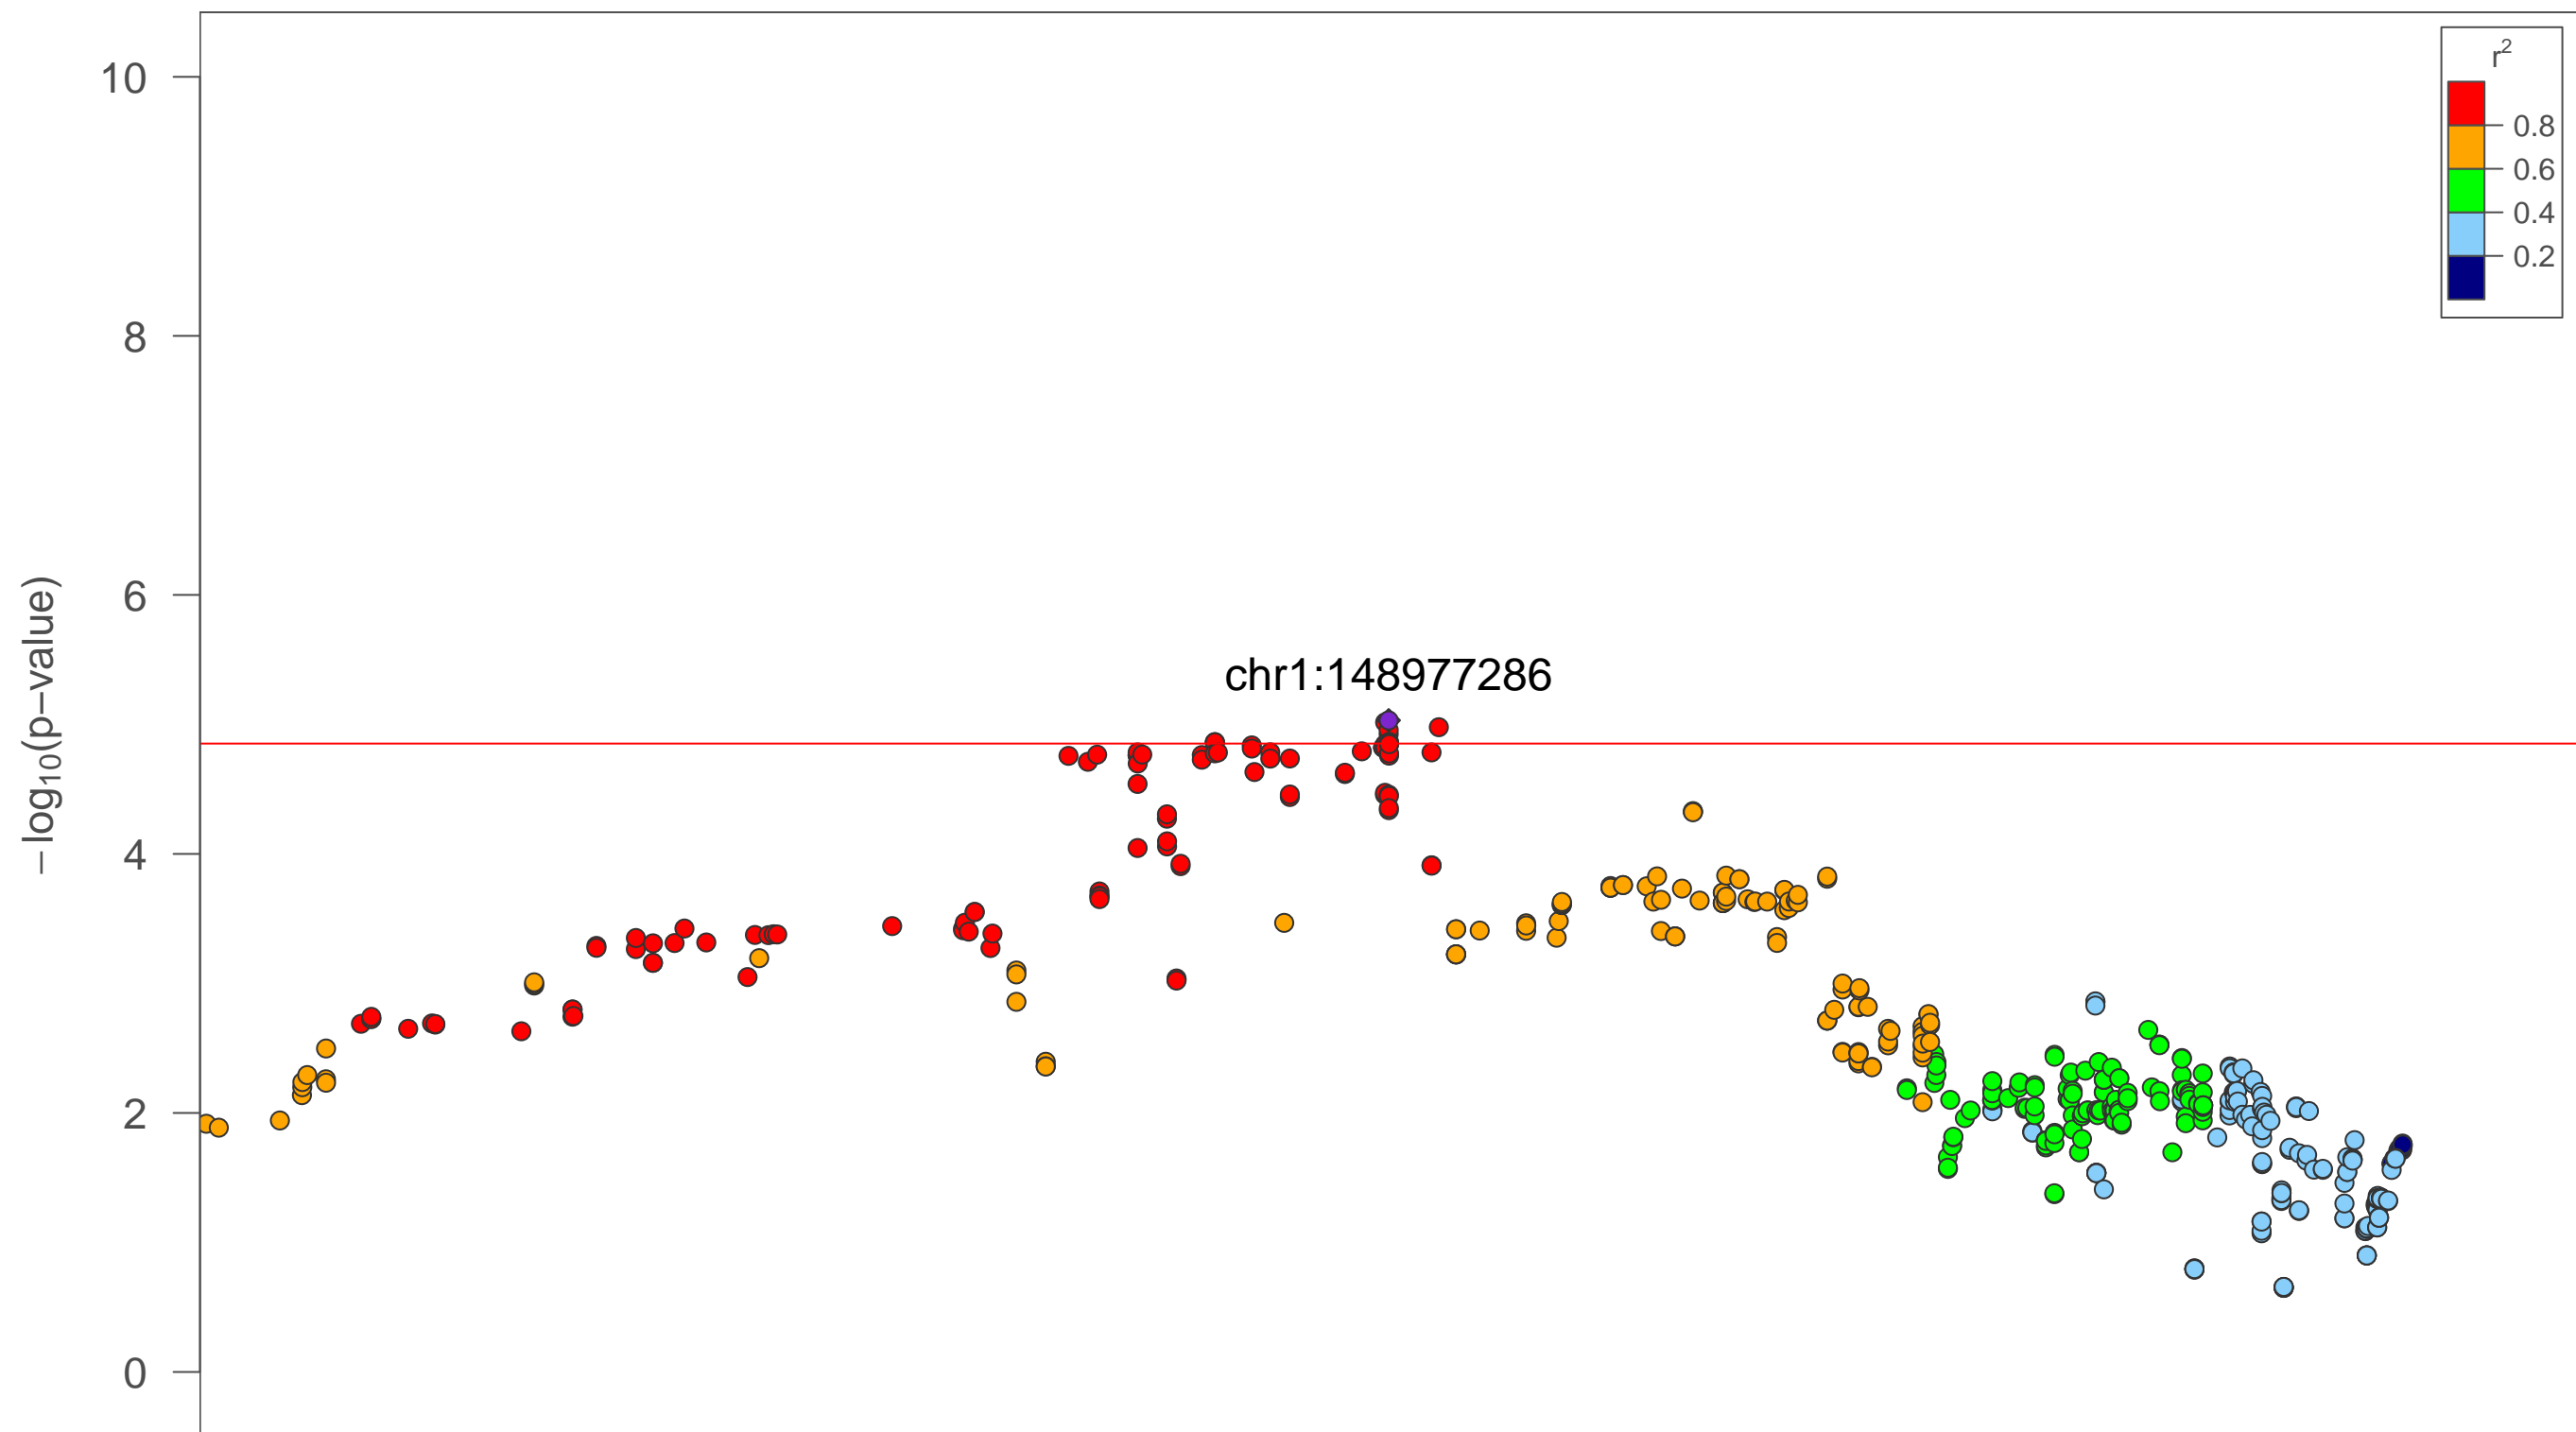

Credible Set

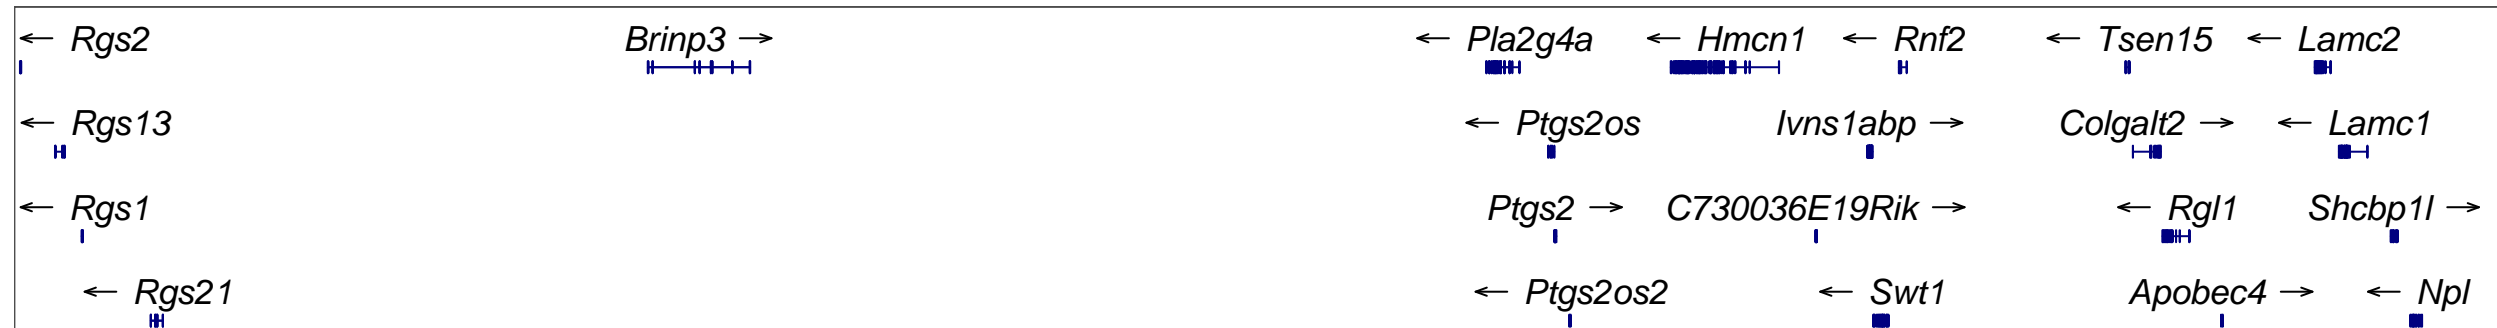

27 genes  
omitted

144

146

148

150

152

Position on chr1 (Mb)

date: Thu Oct 25 17:05:22 2018

build: F34GBS

display range: chr1:143977286–153977286 [143977286–153977286]

hilite range: 0 – 0 [ 0 – 0 ]

reference SNP: chr1:148977286

number of SNPs plotted: 507

min P-value: 9.3E–6 [chr1:148977286]

max P-value: 2.24E–1 [chr1:152741578]

omitted Genes: Rgs18, Pdc, 2310030A07Rik

omitted Genes: BC003331, Tpr, Prg4

omitted Genes: Trmt1l, Mir7682, Fam129a

omitted Genes: Edem3, 1700025G04Rik, Arpc5

omitted Genes: Ncf2, Smg7, Nmnat2

omitted Genes: E330020D12Rik, Dhx9, Rgs8

omitted Genes: C230024C17Rik, Rgs16, Rnasel

omitted Genes: Rgs11, Teddm2, Teddm1b

omitted Genes: Teddm1a, Mir8114, Glul

## Fine-mapping Regions

| snp            | chr | pos (Mb) | pp           | group        | color  |
|----------------|-----|----------|--------------|--------------|--------|
| chr1:145811289 | 1   | 145.8113 | 0.0008577369 | Credible Set | purple |
| chr1:145973832 | 1   | 145.9738 | 0.0007888857 | Credible Set | purple |
| chr1:146015408 | 1   | 146.0154 | 0.0010040533 | Credible Set | purple |
| chr1:146107352 | 1   | 146.1074 | 0.0007967460 | Credible Set | purple |
| chr1:146312032 | 1   | 146.3120 | 0.0009021361 | Credible Set | purple |
| chr1:146368627 | 1   | 146.3686 | 0.0008993730 | Credible Set | purple |
| chr1:146391182 | 1   | 146.3912 | 0.0009119973 | Credible Set | purple |
| chr1:146391258 | 1   | 146.3913 | 0.0009119973 | Credible Set | purple |
| chr1:146405751 | 1   | 146.4058 | 0.0009091695 | Credible Set | purple |
| chr1:146889105 | 1   | 146.8891 | 0.0010454772 | Credible Set | purple |
| chr1:147187489 | 1   | 147.1875 | 0.0010033201 | Credible Set | purple |
| chr1:147187492 | 1   | 147.1875 | 0.0009753461 | Credible Set | purple |
| chr1:147194857 | 1   | 147.1949 | 0.0011050430 | Credible Set | purple |
| chr1:147211205 | 1   | 147.2112 | 0.0009529823 | Credible Set | purple |
| chr1:147236178 | 1   | 147.2362 | 0.0013229254 | Credible Set | purple |
| chr1:147236210 | 1   | 147.2362 | 0.0013215781 | Credible Set | purple |
| chr1:147310927 | 1   | 147.3109 | 0.0009236106 | Credible Set | purple |
| chr1:147630646 | 1   | 147.6306 | 0.0182459695 | Credible Set | purple |
| chr1:147712367 | 1   | 147.7124 | 0.0165009220 | Credible Set | purple |
| chr1:147751084 | 1   | 147.7511 | 0.0186180085 | Credible Set | purple |
| chr1:147760964 | 1   | 147.7610 | 0.0018628660 | Credible Set | purple |
| chr1:147760989 | 1   | 147.7610 | 0.0017353471 | Credible Set | purple |
| chr1:147761018 | 1   | 147.7610 | 0.0017136111 | Credible Set | purple |
| chr1:147761024 | 1   | 147.7610 | 0.0016379357 | Credible Set | purple |
| chr1:147921174 | 1   | 147.9212 | 0.0113437693 | Credible Set | purple |
| chr1:147921280 | 1   | 147.9213 | 0.0038550808 | Credible Set | purple |
| chr1:147921379 | 1   | 147.9214 | 0.0184018429 | Credible Set | purple |
| chr1:147921380 | 1   | 147.9214 | 0.0184305278 | Credible Set | purple |
| chr1:147921465 | 1   | 147.9215 | 0.0193593349 | Credible Set | purple |
| chr1:147921979 | 1   | 147.9220 | 0.0160262666 | Credible Set | purple |
| chr1:147940897 | 1   | 147.9409 | 0.0186561195 | Credible Set | purple |
| chr1:148044707 | 1   | 148.0447 | 0.0063120964 | Credible Set | purple |
| chr1:148044765 | 1   | 148.0448 | 0.0067958992 | Credible Set | purple |
| chr1:148045257 | 1   | 148.0453 | 0.0039575226 | Credible Set | purple |
| chr1:148045260 | 1   | 148.0453 | 0.0043140694 | Credible Set | purple |
| chr1:148102161 | 1   | 148.1022 | 0.0028430468 | Credible Set | purple |

## Fine-mapping Regions

| snp            | chr | pos (Mb) | pp          | group        | color  |
|----------------|-----|----------|-------------|--------------|--------|
| chr1:148102208 | 1   | 148.1022 | 0.002957991 | Credible Set | purple |
| chr1:148191398 | 1   | 148.1914 | 0.018498438 | Credible Set | purple |
| chr1:148191461 | 1   | 148.1915 | 0.017098490 | Credible Set | purple |
| chr1:148246268 | 1   | 148.2463 | 0.023058953 | Credible Set | purple |
| chr1:148246270 | 1   | 148.2463 | 0.022938019 | Credible Set | purple |
| chr1:148246308 | 1   | 148.2463 | 0.022938019 | Credible Set | purple |
| chr1:148246370 | 1   | 148.2464 | 0.019034858 | Credible Set | purple |
| chr1:148259002 | 1   | 148.2590 | 0.019304910 | Credible Set | purple |
| chr1:148401594 | 1   | 148.4016 | 0.021791085 | Credible Set | purple |
| chr1:148401658 | 1   | 148.4017 | 0.020635979 | Credible Set | purple |
| chr1:148412829 | 1   | 148.4128 | 0.013877302 | Credible Set | purple |
| chr1:148479166 | 1   | 148.4792 | 0.019399154 | Credible Set | purple |
| chr1:148479488 | 1   | 148.4795 | 0.017410552 | Credible Set | purple |
| chr1:148561626 | 1   | 148.5616 | 0.017452817 | Credible Set | purple |
| chr1:148561643 | 1   | 148.5616 | 0.009100144 | Credible Set | purple |
| chr1:148561679 | 1   | 148.5617 | 0.009496714 | Credible Set | purple |
| chr1:148793161 | 1   | 148.7932 | 0.013416499 | Credible Set | purple |
| chr1:148793216 | 1   | 148.7932 | 0.013720055 | Credible Set | purple |
| chr1:148864191 | 1   | 148.8642 | 0.019700105 | Credible Set | purple |
| chr1:148954162 | 1   | 148.9542 | 0.020982278 | Credible Set | purple |
| chr1:148954168 | 1   | 148.9542 | 0.020982278 | Credible Set | purple |
| chr1:148954207 | 1   | 148.9542 | 0.020982278 | Credible Set | purple |
| chr1:148961834 | 1   | 148.9618 | 0.009444397 | Credible Set | purple |
| chr1:148961852 | 1   | 148.9619 | 0.009767569 | Credible Set | purple |
| chr1:148962391 | 1   | 148.9624 | 0.022250022 | Credible Set | purple |
| chr1:148962448 | 1   | 148.9624 | 0.021115456 | Credible Set | purple |
| chr1:148962557 | 1   | 148.9626 | 0.032215213 | Credible Set | purple |
| chr1:148977255 | 1   | 148.9773 | 0.026336507 | Credible Set | purple |
| chr1:148977279 | 1   | 148.9773 | 0.028310124 | Credible Set | purple |
| chr1:148977286 | 1   | 148.9773 | 0.033309888 | Credible Set | purple |
| chr1:148977945 | 1   | 148.9779 | 0.009454303 | Credible Set | purple |
| chr1:148977976 | 1   | 148.9780 | 0.009250681 | Credible Set | purple |
| chr1:148977977 | 1   | 148.9780 | 0.007291518 | Credible Set | purple |
| chr1:148977984 | 1   | 148.9780 | 0.007549454 | Credible Set | purple |
| chr1:148978648 | 1   | 148.9786 | 0.023116484 | Credible Set | purple |
| chr1:148978689 | 1   | 148.9787 | 0.022578943 | Credible Set | purple |

Fine-mapping Regions

| snp            | chr | pos (Mb) | pp          | group        | color  |
|----------------|-----|----------|-------------|--------------|--------|
| chr1:148978796 | 1   | 148.9788 | 0.022166155 | Credible Set | purple |
| chr1:148978842 | 1   | 148.9788 | 0.018304987 | Credible Set | purple |
| chr1:148978923 | 1   | 148.9789 | 0.019015093 | Credible Set | purple |
| chr1:148979220 | 1   | 148.9792 | 0.022250380 | Credible Set | purple |
| chr1:149157510 | 1   | 149.1575 | 0.019350960 | Credible Set | purple |
| chr1:149157713 | 1   | 149.1577 | 0.002885141 | Credible Set | purple |
| chr1:149157735 | 1   | 149.1577 | 0.002866823 | Credible Set | purple |
| chr1:149188240 | 1   | 149.1882 | 0.029664902 | Credible Set | purple |

F34 GBS, routine CBC hemoglobin

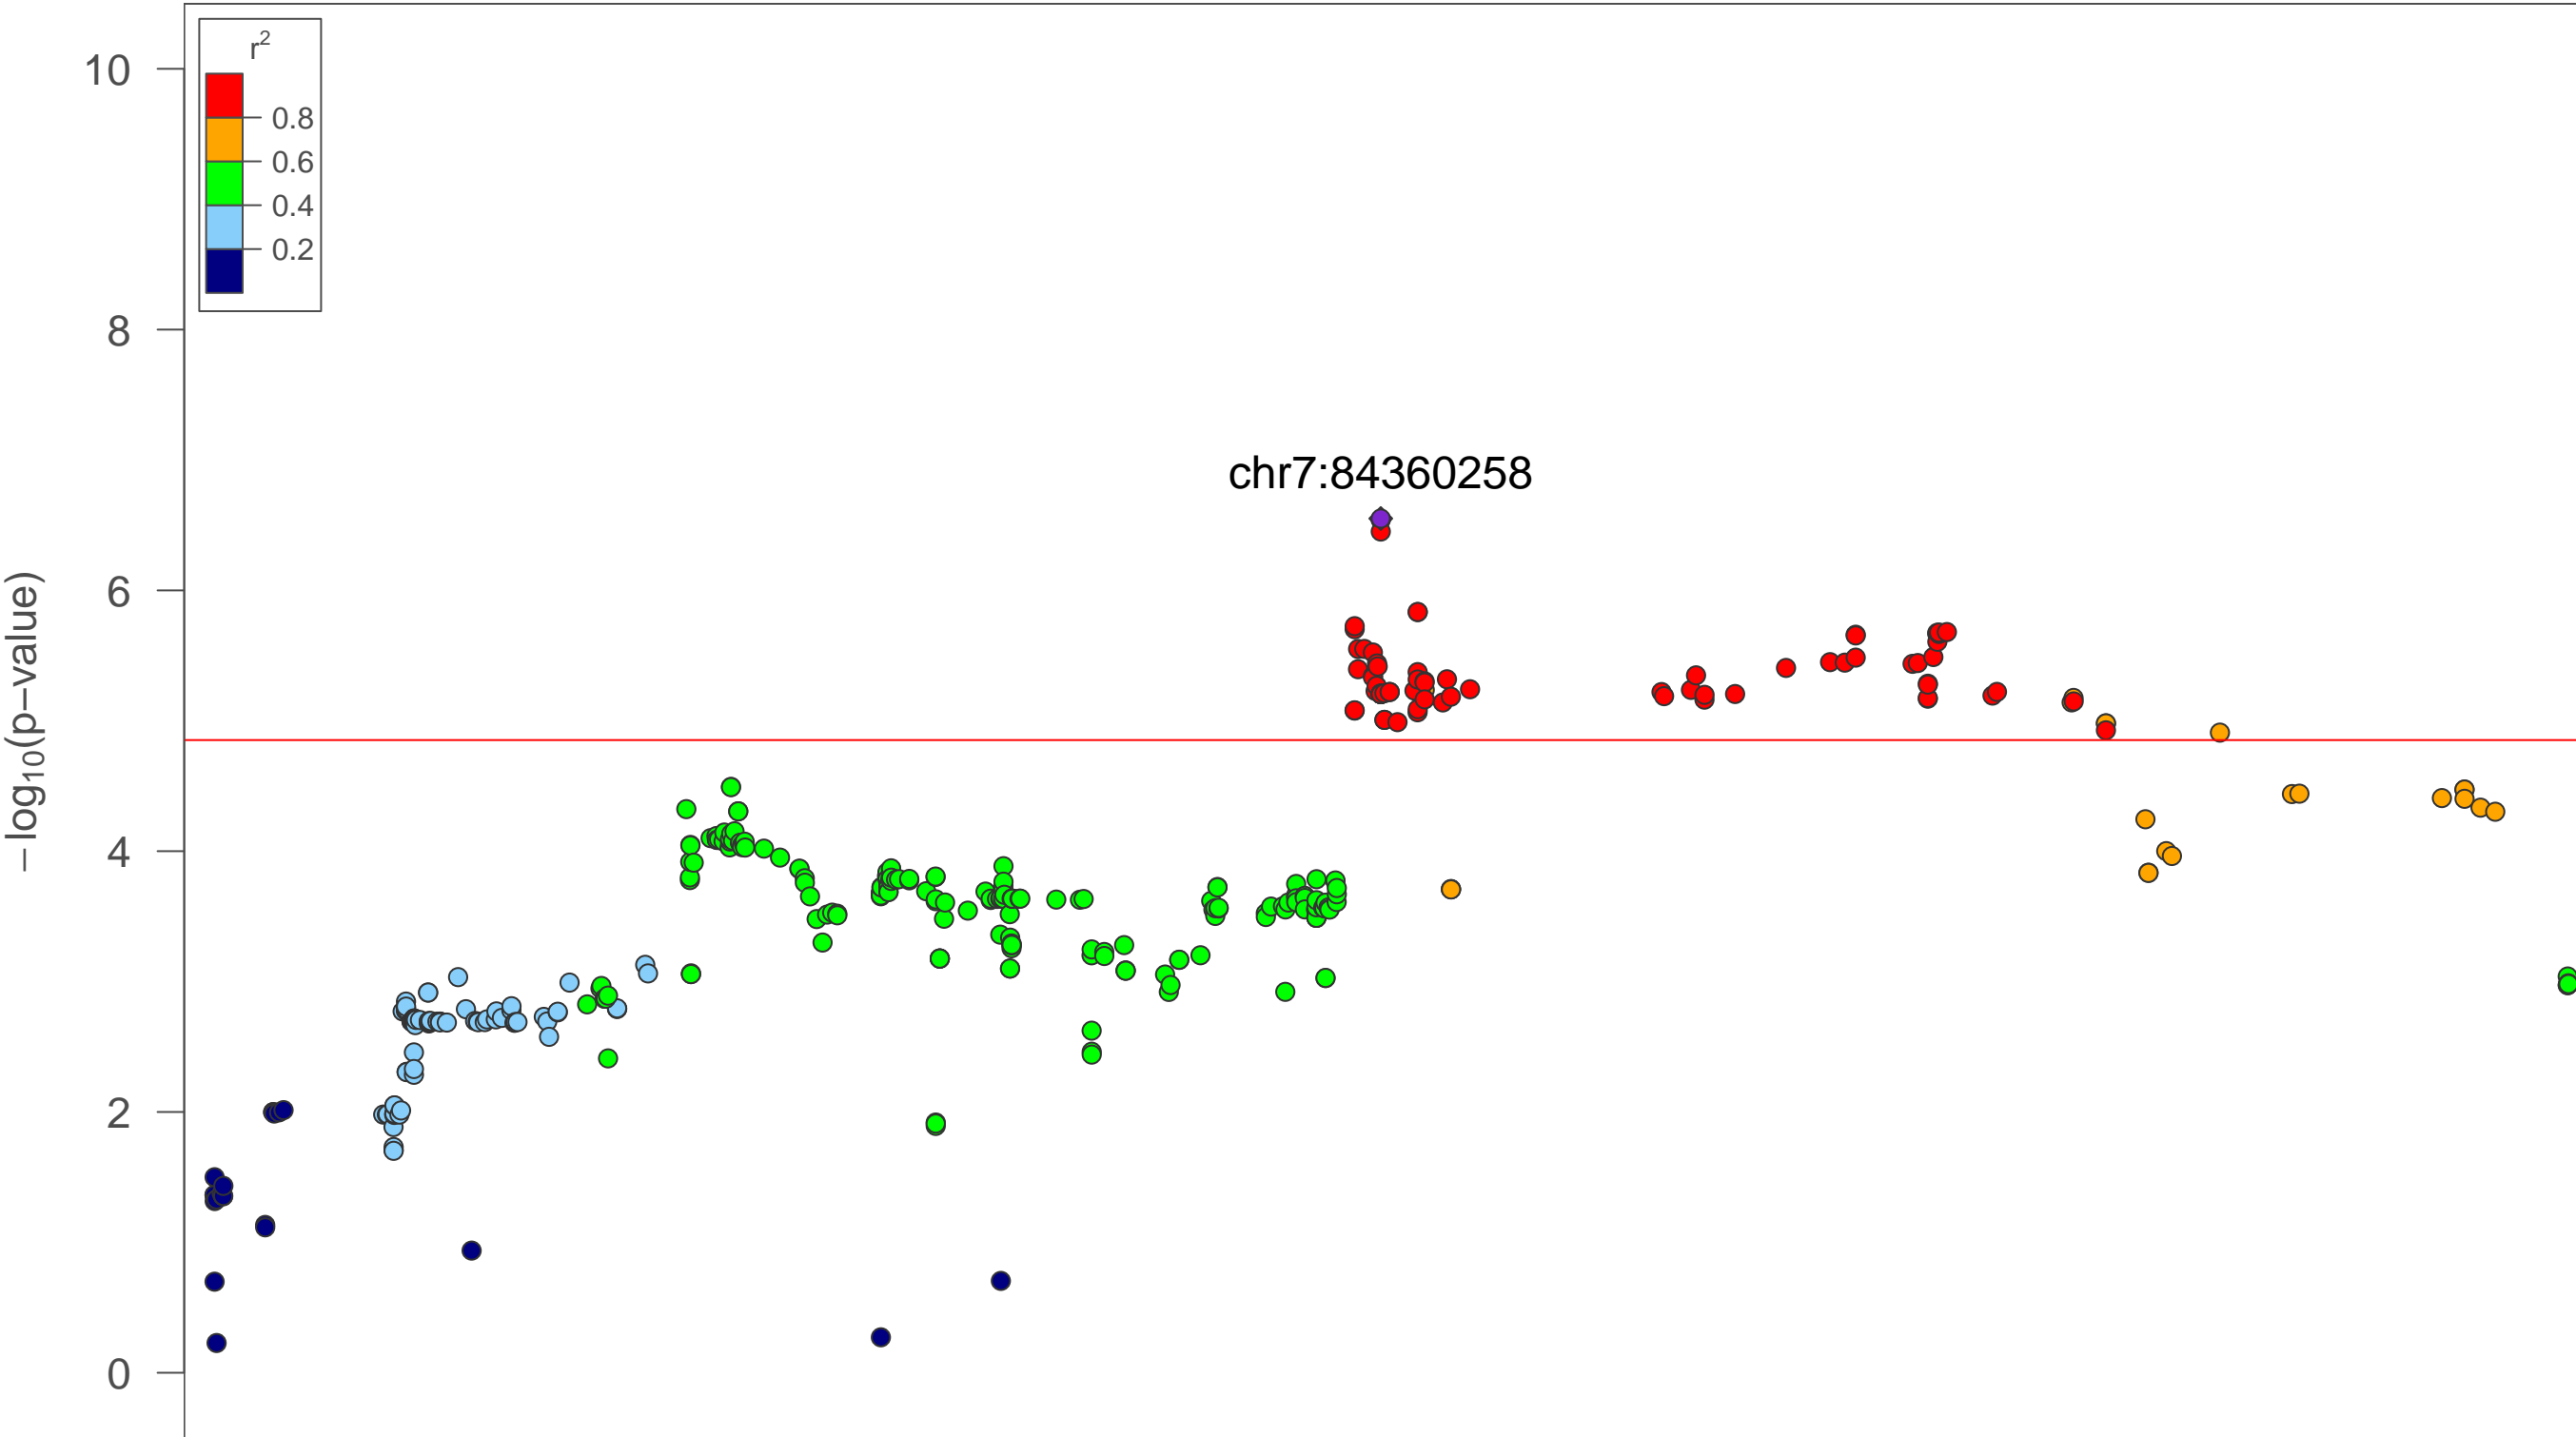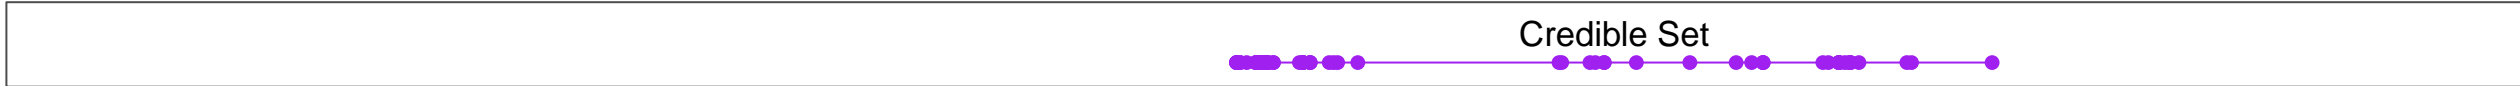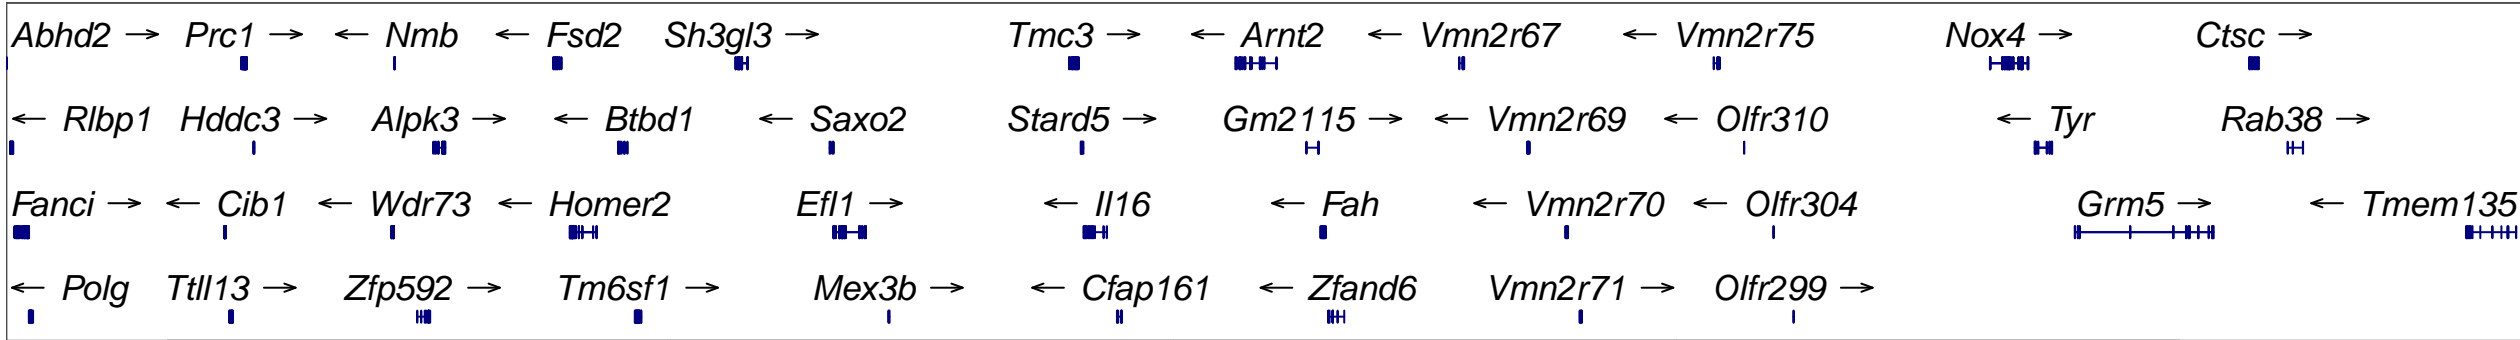

78 genes  
omitted



date: Thu Oct 25 17:05:33 2018  
build: F34GBS  
display range: chr7:79360258–89360258 [79360258–89360258]  
hilite range: 0 – 0 [ 0 – 0 ]  
reference SNP: chr7:84360258  
number of SNPs plotted: 391  
min P-value: 2.81E–7 [chr7:84360258]  
max P-value: 5.91E–1 [chr7:79496275]  
omitted Genes: Mir9–3hg, Mir9–3, Rhcg  
omitted Genes: Ticrr, Kif7, Plin1  
omitted Genes: Pex11a, Wdr93, Mesp1  
omitted Genes: Mesp2, Anpep, Ap3s2  
omitted Genes: Arpin, Zfp710, Gm21057  
omitted Genes: Idh2, Sema4b, Gdpgp1  
omitted Genes: Ngrn, Vps33b, Rccd1  
omitted Genes: Unc45a, Man2a2, Fes  
omitted Genes: Furin, Blm, Crtc3  
omitted Genes: Gm15880, Iqgap1, Zscan2  
omitted Genes: Sec11a, Slc28a1, Pde8a  
omitted Genes: Rps17, Cpeb1, Ap3b2  
omitted Genes: BC048679, 2900076A07Rik, Mir1839  
omitted Genes: Whamm, Fam103a1, 3110040N11Rik  
omitted Genes: Hdgfrp3, Bnc1, Gm20744  
omitted Genes: Adamtsl3, 4933406J10Rik, 4933430H16Rik  
omitted Genes: Mesdc1, Mesdc2, Cemip  
omitted Genes: Abhd17c, 2610206C17Rik, Olfr291  
omitted Genes: Olfr290, Vmn2r65, Vmn2r66  
omitted Genes: Vmn2r68, Vmn2r72, Vmn2r73  
omitted Genes: Vmn2r74, Vmn2r76, Olfr309  
omitted Genes: Olfr308, Olfr307, Olfr305  
omitted Genes: Olfr303, Olfr301, Olfr298  
omitted Genes: Olfr297, Olfr295, Olfr294  
omitted Genes: Olfr293, Olfr292, Folh1  
omitted Genes: Vmn2r77, Vmn2r78, Vmn2r79

## Fine-mapping Regions

| snp           | chr | pos (Mb) | pp          | group        | color  |
|---------------|-----|----------|-------------|--------------|--------|
| chr7:84250985 | 7   | 84.25099 | 0.004369210 | Credible Set | purple |
| chr7:84251011 | 7   | 84.25101 | 0.004389647 | Credible Set | purple |
| chr7:84251159 | 7   | 84.25116 | 0.017322996 | Credible Set | purple |
| chr7:84251209 | 7   | 84.25121 | 0.018238578 | Credible Set | purple |
| chr7:84265410 | 7   | 84.26541 | 0.008791376 | Credible Set | purple |
| chr7:84265685 | 7   | 84.26569 | 0.012380497 | Credible Set | purple |
| chr7:84291540 | 7   | 84.29154 | 0.012397689 | Credible Set | purple |
| chr7:84327288 | 7   | 84.32729 | 0.011673098 | Credible Set | purple |
| chr7:84327808 | 7   | 84.32781 | 0.007835286 | Credible Set | purple |
| chr7:84327850 | 7   | 84.32785 | 0.007649291 | Credible Set | purple |
| chr7:84338595 | 7   | 84.33859 | 0.006078888 | Credible Set | purple |
| chr7:84343118 | 7   | 84.34312 | 0.006637969 | Credible Set | purple |
| chr7:84344805 | 7   | 84.34480 | 0.009692791 | Credible Set | purple |
| chr7:84347423 | 7   | 84.34742 | 0.009211168 | Credible Set | purple |
| chr7:84360038 | 7   | 84.36004 | 0.005835539 | Credible Set | purple |
| chr7:84360224 | 7   | 84.36022 | 0.111211961 | Credible Set | purple |
| chr7:84360247 | 7   | 84.36025 | 0.112493837 | Credible Set | purple |
| chr7:84360258 | 7   | 84.36026 | 0.113748596 | Credible Set | purple |
| chr7:84360279 | 7   | 84.36028 | 0.091143796 | Credible Set | purple |
| chr7:84360626 | 7   | 84.36063 | 0.005773288 | Credible Set | purple |
| chr7:84360642 | 7   | 84.36064 | 0.005773288 | Credible Set | purple |
| chr7:84360703 | 7   | 84.36070 | 0.005773288 | Credible Set | purple |
| chr7:84360714 | 7   | 84.36071 | 0.005773288 | Credible Set | purple |
| chr7:84360716 | 7   | 84.36072 | 0.005773288 | Credible Set | purple |
| chr7:84375526 | 7   | 84.37553 | 0.005862583 | Credible Set | purple |
| chr7:84375577 | 7   | 84.37558 | 0.003735568 | Credible Set | purple |
| chr7:84375642 | 7   | 84.37564 | 0.003735568 | Credible Set | purple |
| chr7:84397575 | 7   | 84.39758 | 0.005982792 | Credible Set | purple |
| chr7:84397597 | 7   | 84.39760 | 0.005982792 | Credible Set | purple |
| chr7:84501082 | 7   | 84.50108 | 0.006122093 | Credible Set | purple |
| chr7:84514082 | 7   | 84.51408 | 0.004245872 | Credible Set | purple |
| chr7:84514444 | 7   | 84.51444 | 0.008375030 | Credible Set | purple |
| chr7:84514505 | 7   | 84.51450 | 0.007391224 | Credible Set | purple |
| chr7:84514564 | 7   | 84.51456 | 0.023163768 | Credible Set | purple |
| chr7:84514575 | 7   | 84.51457 | 0.023206018 | Credible Set | purple |
| chr7:84514734 | 7   | 84.51473 | 0.004472572 | Credible Set | purple |

## Fine-mapping Regions

| snp           | chr | pos (Mb) | pp          | group        | color  |
|---------------|-----|----------|-------------|--------------|--------|
| chr7:84543346 | 7   | 84.54335 | 0.007165240 | Credible Set | purple |
| chr7:84543355 | 7   | 84.54336 | 0.007023433 | Credible Set | purple |
| chr7:84543782 | 7   | 84.54378 | 0.005281014 | Credible Set | purple |
| chr7:84619632 | 7   | 84.61963 | 0.005012820 | Credible Set | purple |
| chr7:84636759 | 7   | 84.63676 | 0.007415041 | Credible Set | purple |
| chr7:84653095 | 7   | 84.65309 | 0.005521391 | Credible Set | purple |
| chr7:84733186 | 7   | 84.73319 | 0.006266030 | Credible Set | purple |
| chr7:85533207 | 7   | 85.53321 | 0.005977768 | Credible Set | purple |
| chr7:85543843 | 7   | 85.54384 | 0.005573826 | Credible Set | purple |
| chr7:85656243 | 7   | 85.65624 | 0.006198745 | Credible Set | purple |
| chr7:85677494 | 7   | 85.67749 | 0.007926949 | Credible Set | purple |
| chr7:85712663 | 7   | 85.71266 | 0.005255469 | Credible Set | purple |
| chr7:85712975 | 7   | 85.71298 | 0.005700249 | Credible Set | purple |
| chr7:85840665 | 7   | 85.84067 | 0.005779641 | Credible Set | purple |
| chr7:86053386 | 7   | 86.05339 | 0.008986956 | Credible Set | purple |
| chr7:86237374 | 7   | 86.23737 | 0.009910253 | Credible Set | purple |
| chr7:86298979 | 7   | 86.29898 | 0.009829927 | Credible Set | purple |
| chr7:86344420 | 7   | 86.34442 | 0.015774234 | Credible Set | purple |
| chr7:86344437 | 7   | 86.34444 | 0.015571005 | Credible Set | purple |
| chr7:86344488 | 7   | 86.34449 | 0.010698252 | Credible Set | purple |
| chr7:86582139 | 7   | 86.58214 | 0.009631569 | Credible Set | purple |
| chr7:86603770 | 7   | 86.60377 | 0.009763695 | Credible Set | purple |
| chr7:86645719 | 7   | 86.64572 | 0.005342458 | Credible Set | purple |
| chr7:86645792 | 7   | 86.64579 | 0.005397533 | Credible Set | purple |
| chr7:86645947 | 7   | 86.64595 | 0.006879130 | Credible Set | purple |
| chr7:86645990 | 7   | 86.64599 | 0.006780100 | Credible Set | purple |
| chr7:86668998 | 7   | 86.66900 | 0.010806677 | Credible Set | purple |
| chr7:86685648 | 7   | 86.68565 | 0.013988330 | Credible Set | purple |
| chr7:86692214 | 7   | 86.69221 | 0.015974588 | Credible Set | purple |
| chr7:86692491 | 7   | 86.69249 | 0.016372079 | Credible Set | purple |
| chr7:86725518 | 7   | 86.72552 | 0.016501220 | Credible Set | purple |
| chr7:86916161 | 7   | 86.91616 | 0.005627650 | Credible Set | purple |
| chr7:86934710 | 7   | 86.93471 | 0.005992317 | Credible Set | purple |
| chr7:87255156 | 7   | 87.25516 | 0.005102177 | Credible Set | purple |

F34 GBS, routine CBC hematocrit

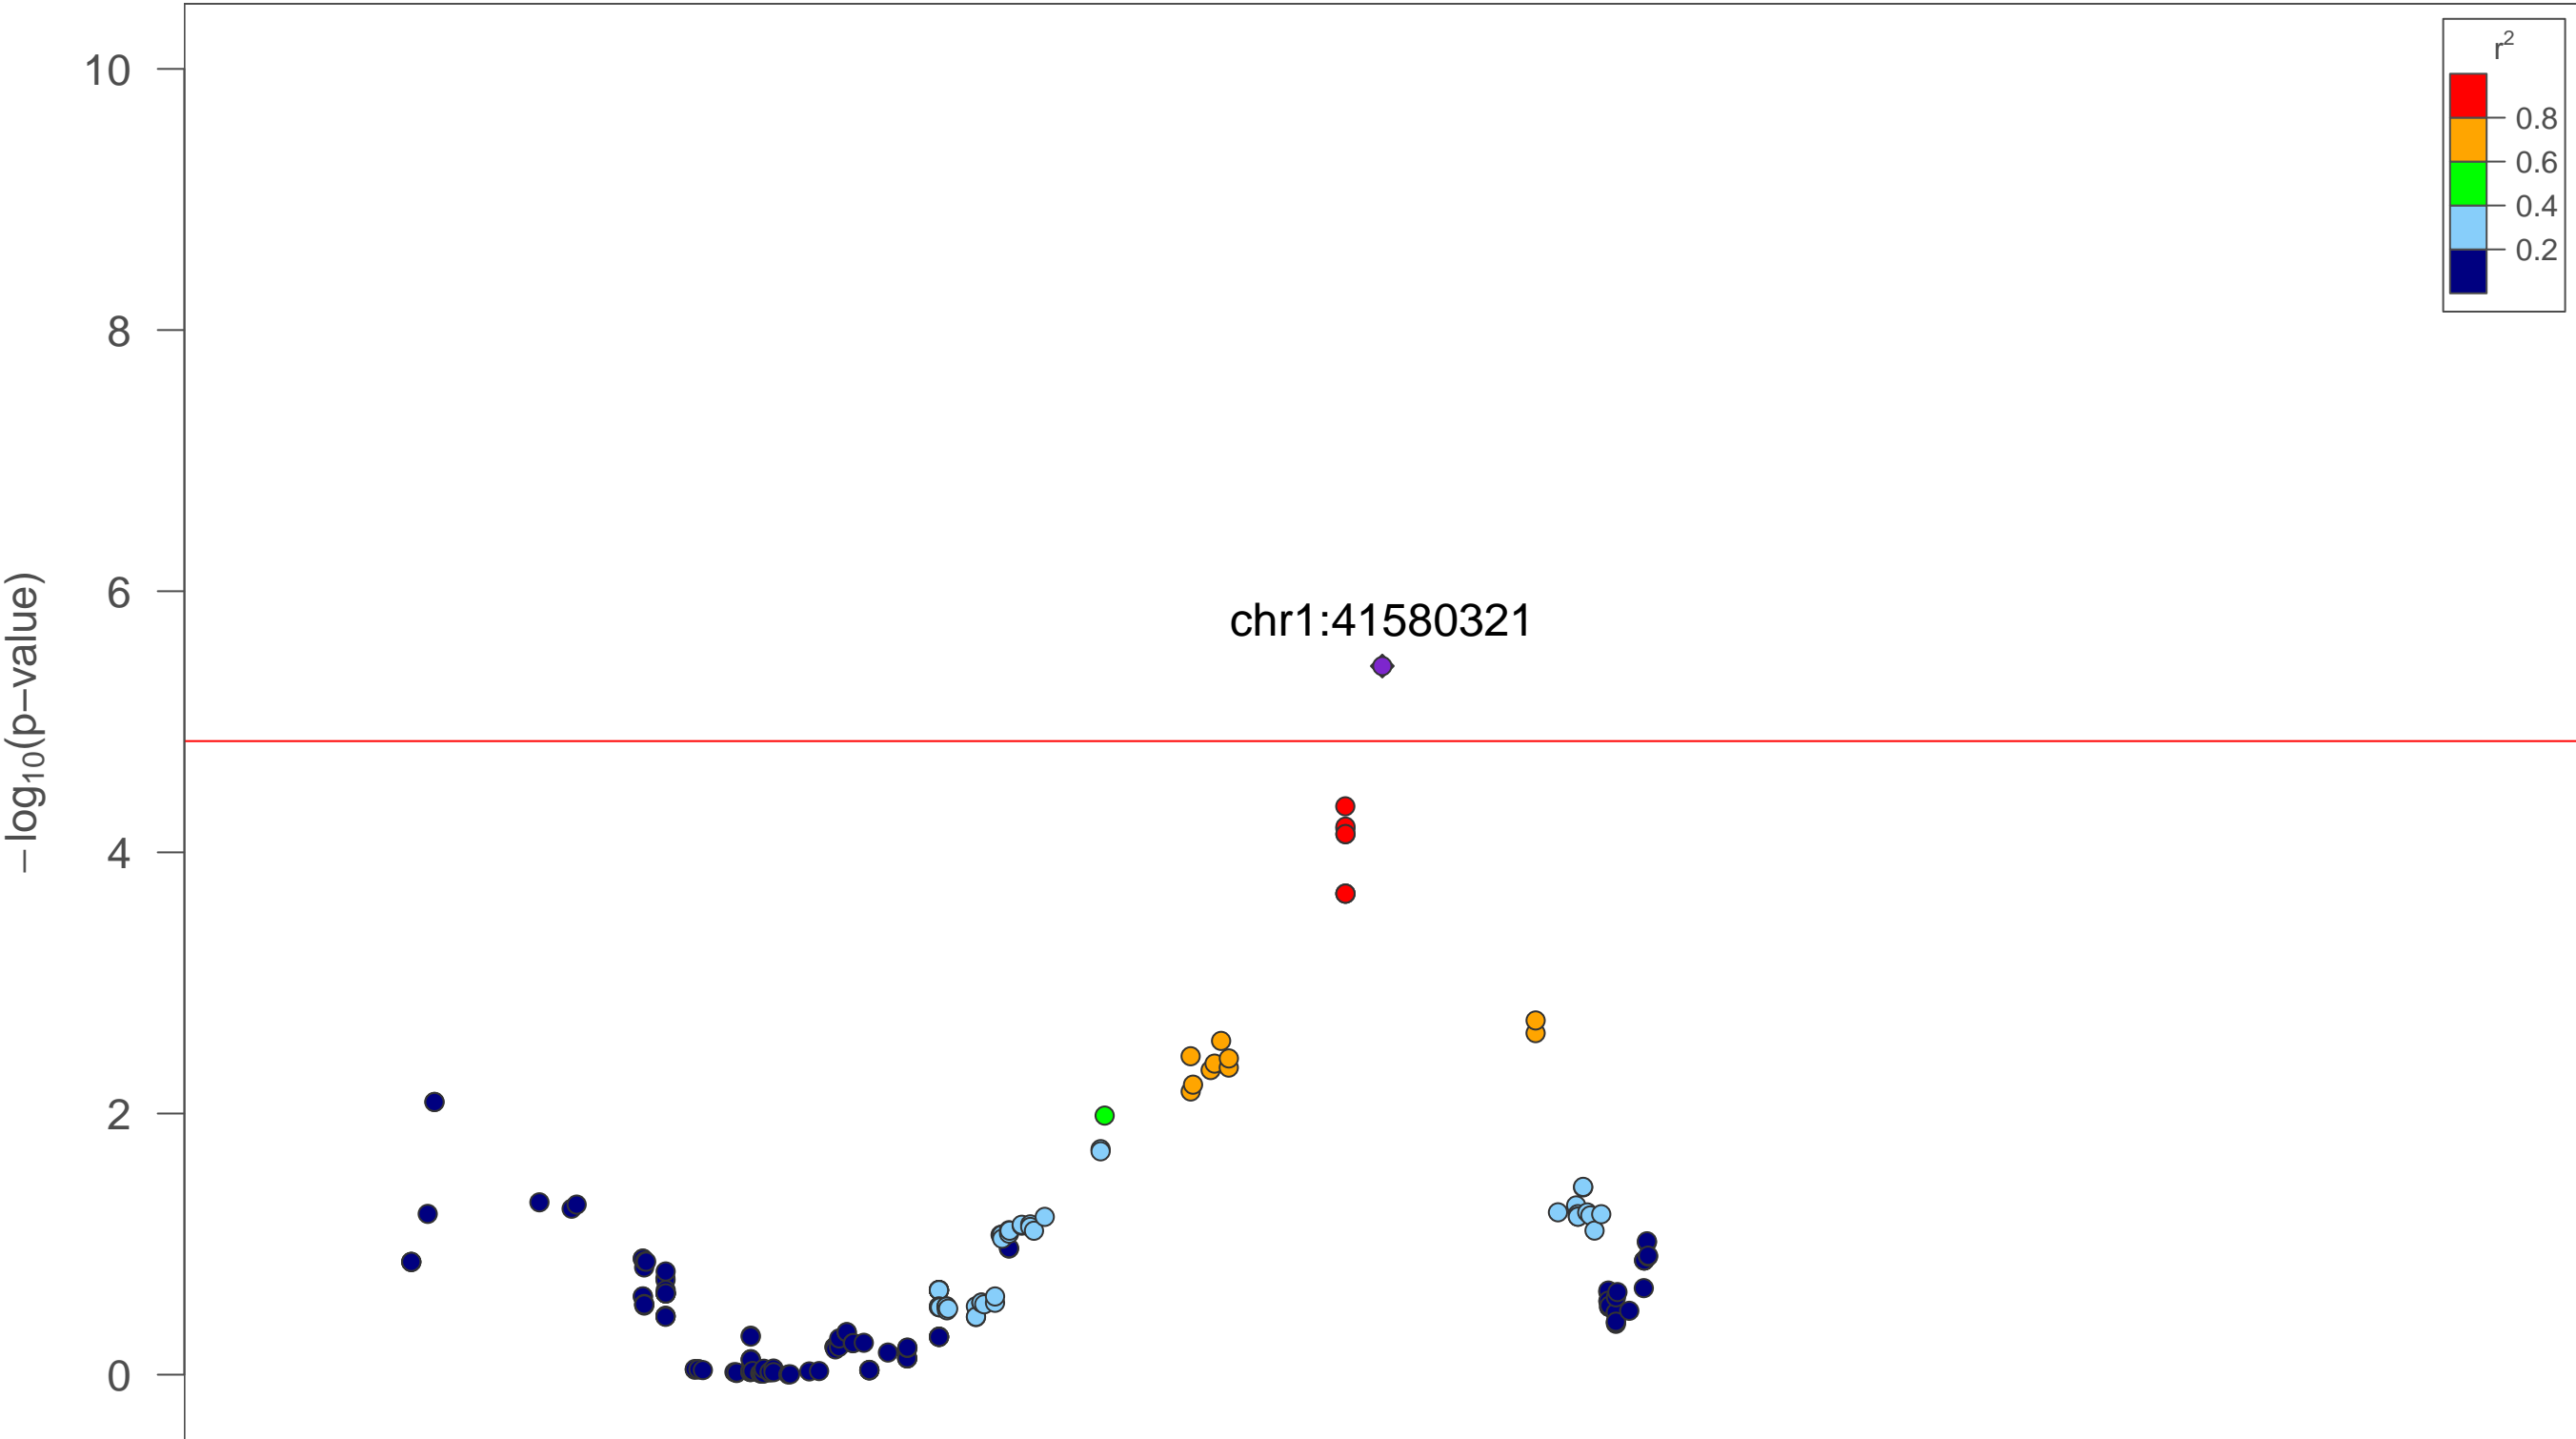

Credible Set

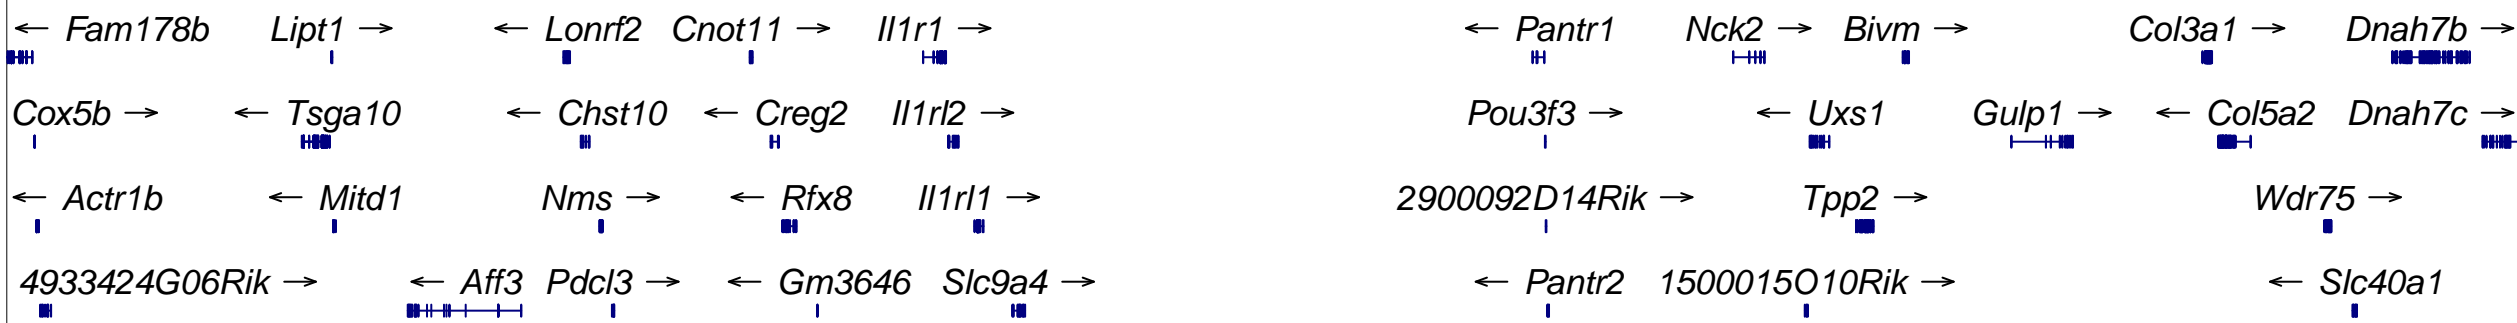

44 genes  
omitted

Position on chr1 (Mb)

date: Thu Oct 25 17:10:49 2018  
build: F34GBS  
display range: chr1:36580321–46580321 [36580321–46580321]  
hilite range: 0 – 0 [ 0 – 0 ]  
reference SNP: chr1:41580321  
number of SNPs plotted: 187  
min P-value: 3.74E–6 [chr1:41580321]  
max P-value: 9.96E–1 [chr1:39101479]  
omitted Genes: Zap70, Tmem131, Cnga3  
omitted Genes: Inpp4a, Coa5, Unc50  
omitted Genes: Mgat4a, 4930594C11Rik, 2010300C02Rik  
omitted Genes: Mrpl30, Lyg2, Lyg1  
omitted Genes: Txndc9, Eif5b, Rev1  
omitted Genes: Mir6349, Npas2, Rpl31  
omitted Genes: Tbc1d8, Snord89, Rnf149  
omitted Genes: 1700066B17Rik, Map4k4, Gm16894  
omitted Genes: Il1r2, Il18r1, Il18rap  
omitted Genes: Slc9a2, Mfsd9, Tmem182  
omitted Genes: 4930448I06Rik, Dalir, Mrps9  
omitted Genes: Gpr45, Tgfbrap1, AI597479  
omitted Genes: Fhl2, Mettl21c, Tex30  
omitted Genes: Kdelc1, Ercc5, Mettl21e  
omitted Genes: 4930521E06Rik, Stk-ps2

Fine-mapping Regions

| snp           | chr | pos (Mb) | pp         | group        | color  |
|---------------|-----|----------|------------|--------------|--------|
| chr1:41425834 | 1   | 41.42583 | 0.06690913 | Credible Set | purple |
| chr1:41426242 | 1   | 41.42624 | 0.04624021 | Credible Set | purple |
| chr1:41426343 | 1   | 41.42634 | 0.01563230 | Credible Set | purple |
| chr1:41426398 | 1   | 41.42640 | 0.01563230 | Credible Set | purple |
| chr1:41426422 | 1   | 41.42642 | 0.01563230 | Credible Set | purple |
| chr1:41426449 | 1   | 41.42645 | 0.04767386 | Credible Set | purple |
| chr1:41426503 | 1   | 41.42650 | 0.04195553 | Credible Set | purple |
| chr1:41426526 | 1   | 41.42653 | 0.04211278 | Credible Set | purple |
| chr1:41580321 | 1   | 41.58032 | 0.70821160 | Credible Set | purple |

F34 GBS, routine CBC mean corpuscular hemoglobin

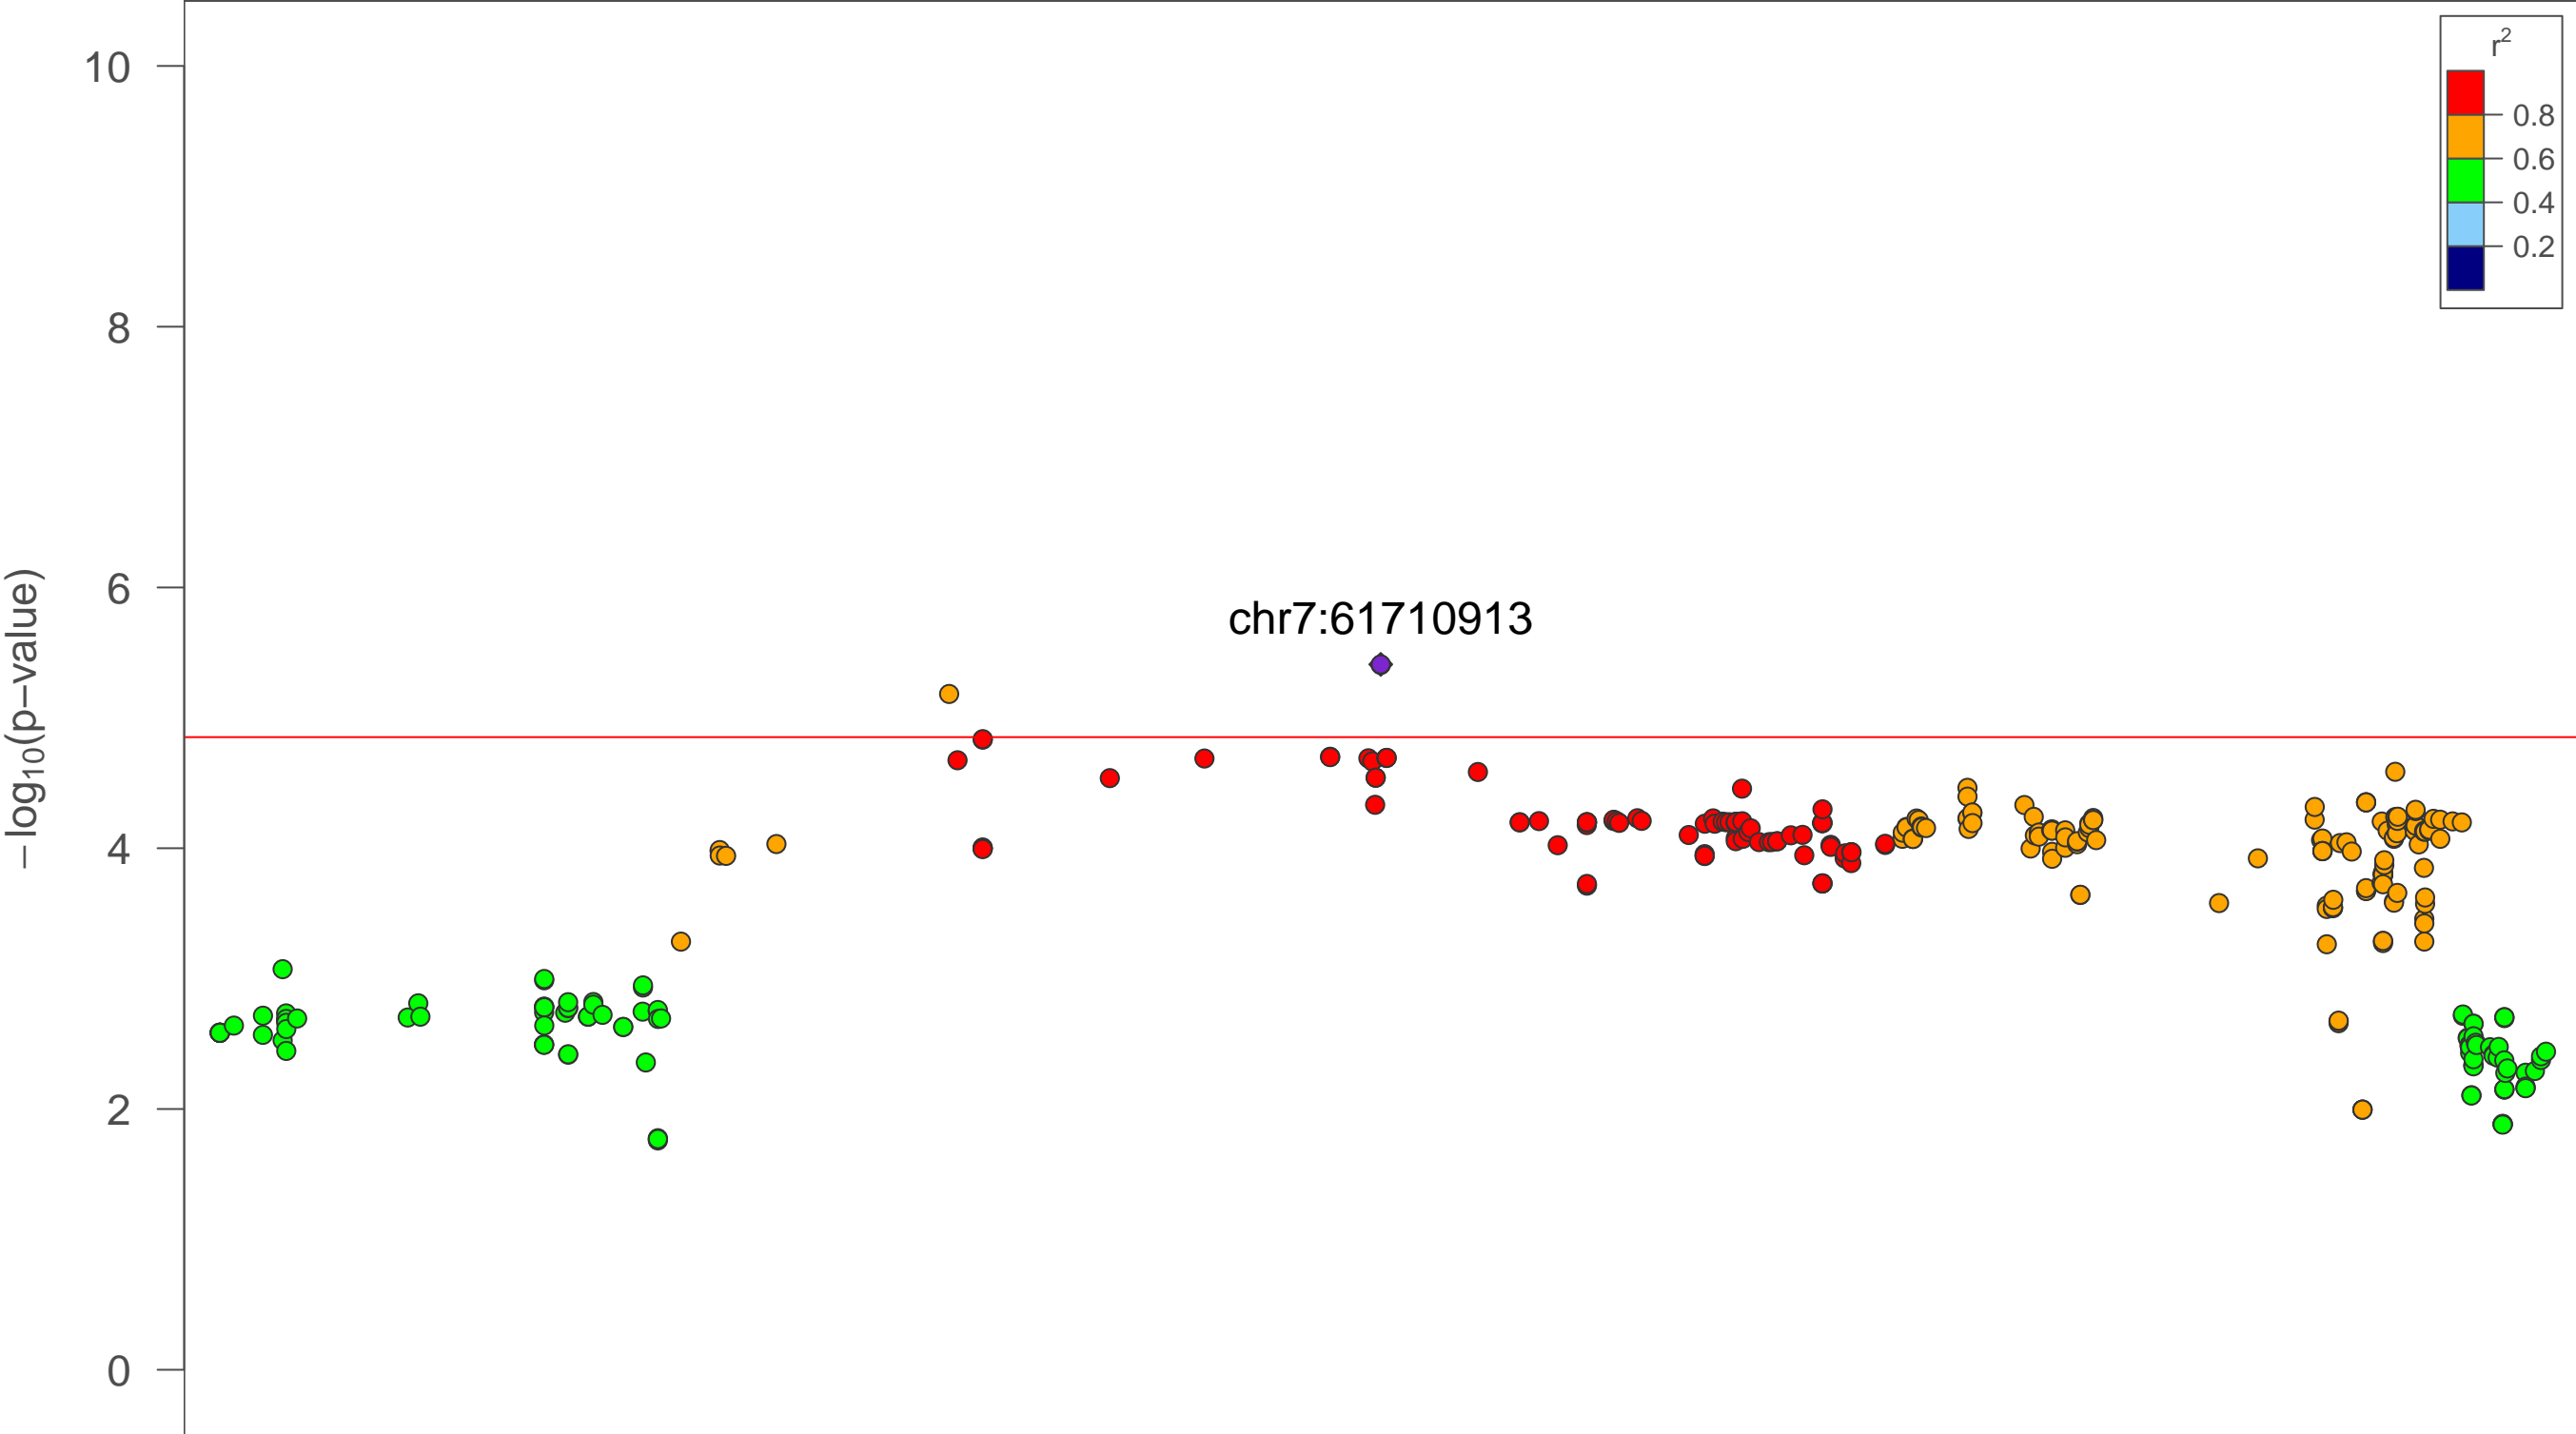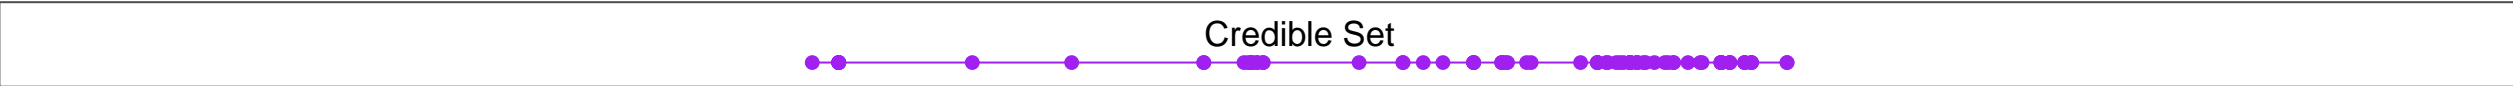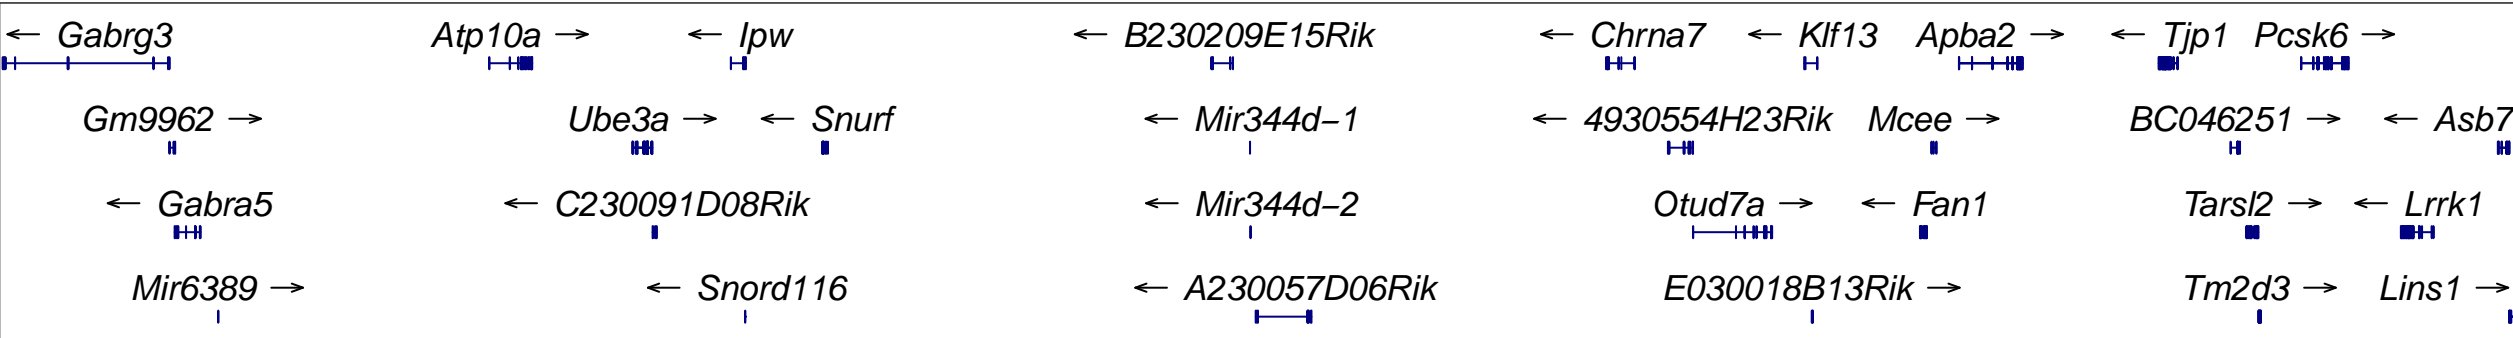

36 genes  
omitted

date: Thu Oct 25 17:11:36 2018  
build: F34GBS  
display range: chr7:56710913–66710913 [56710913–66710913]  
hilite range: 0 – 0 [ 0 – 0 ]  
reference SNP: chr7:61710913  
number of SNPs plotted: 336  
min P-value: 3.89E–6 [chr7:61710913]  
max P-value: 1.74E–2 [chr7:58690611]  
omitted Genes: Gabrb3, Snord116l2, Snord116l1  
omitted Genes: Snhg14, Snord64, Snrpn  
omitted Genes: Gm7367, Mir344d–3, Mir344e  
omitted Genes: Mir344h–1, Mir344h–2, Mir344b  
omitted Genes: Mir344c, Mir344, Mir344–2  
omitted Genes: A330076H08Rik, Mir344g, Mir344f  
omitted Genes: Mir344i, Ndn, Magel2  
omitted Genes: Mkrn3, Peg12, Trpm1  
omitted Genes: Mir211, Mir6416, Mtmr10  
omitted Genes: Mphosph10, Fam189a1, Ndnl2  
omitted Genes: 1810008I18Rik, Snrpa1, Vimp  
omitted Genes: Chsy1, Mir7057, Aldh1a3



## Fine-mapping Regions

| snp           | chr | pos (Mb) | pp          | group        | color  |
|---------------|-----|----------|-------------|--------------|--------|
| chr7:59942572 | 7   | 59.94257 | 0.022251592 | Credible Set | purple |
| chr7:60047736 | 7   | 60.04774 | 0.005072398 | Credible Set | purple |
| chr7:60047743 | 7   | 60.04774 | 0.005167092 | Credible Set | purple |
| chr7:60047769 | 7   | 60.04777 | 0.005094818 | Credible Set | purple |
| chr7:60047773 | 7   | 60.04777 | 0.005027397 | Credible Set | purple |
| chr7:60047999 | 7   | 60.04800 | 0.031474306 | Credible Set | purple |
| chr7:60048040 | 7   | 60.04804 | 0.031730538 | Credible Set | purple |
| chr7:60578939 | 7   | 60.57894 | 0.016483308 | Credible Set | purple |
| chr7:60974140 | 7   | 60.97414 | 0.022912960 | Credible Set | purple |
| chr7:61499181 | 7   | 61.49918 | 0.023608267 | Credible Set | purple |
| chr7:61499595 | 7   | 61.49959 | 0.023454797 | Credible Set | purple |
| chr7:61659201 | 7   | 61.65920 | 0.023000487 | Credible Set | purple |
| chr7:61675494 | 7   | 61.67549 | 0.021831864 | Credible Set | purple |
| chr7:61687345 | 7   | 61.68735 | 0.010537402 | Credible Set | purple |
| chr7:61689644 | 7   | 61.68964 | 0.016600154 | Credible Set | purple |
| chr7:61689650 | 7   | 61.68965 | 0.016600154 | Credible Set | purple |
| chr7:61710907 | 7   | 61.71091 | 0.111123981 | Credible Set | purple |
| chr7:61710913 | 7   | 61.71091 | 0.112099696 | Credible Set | purple |
| chr7:61733905 | 7   | 61.73391 | 0.023124976 | Credible Set | purple |
| chr7:61736166 | 7   | 61.73617 | 0.023167659 | Credible Set | purple |
| chr7:62116766 | 7   | 62.11677 | 0.018268790 | Credible Set | purple |
| chr7:62291228 | 7   | 62.29123 | 0.007861675 | Credible Set | purple |
| chr7:62291477 | 7   | 62.29148 | 0.007861675 | Credible Set | purple |
| chr7:62371914 | 7   | 62.37191 | 0.008020960 | Credible Set | purple |
| chr7:62450245 | 7   | 62.45025 | 0.005363873 | Credible Set | purple |
| chr7:62571648 | 7   | 62.57165 | 0.007506324 | Credible Set | purple |
| chr7:62572320 | 7   | 62.57232 | 0.007872096 | Credible Set | purple |
| chr7:62572352 | 7   | 62.57235 | 0.007872096 | Credible Set | purple |
| chr7:62572353 | 7   | 62.57235 | 0.007872096 | Credible Set | purple |
| chr7:62684003 | 7   | 62.68400 | 0.008042015 | Credible Set | purple |
| chr7:62684079 | 7   | 62.68408 | 0.008154924 | Credible Set | purple |
| chr7:62684449 | 7   | 62.68445 | 0.008203114 | Credible Set | purple |
| chr7:62696801 | 7   | 62.69680 | 0.007999415 | Credible Set | purple |
| chr7:62706977 | 7   | 62.70698 | 0.007787941 | Credible Set | purple |
| chr7:62782840 | 7   | 62.78284 | 0.008419134 | Credible Set | purple |
| chr7:62800795 | 7   | 62.80080 | 0.008053060 | Credible Set | purple |

## Fine-mapping Regions

| snp           | chr | pos (Mb) | pp          | group        | color  |
|---------------|-----|----------|-------------|--------------|--------|
| chr7:62997563 | 7   | 62.99756 | 0.006358640 | Credible Set | purple |
| chr7:63064073 | 7   | 63.06407 | 0.004623203 | Credible Set | purple |
| chr7:63064081 | 7   | 63.06408 | 0.004478329 | Credible Set | purple |
| chr7:63064100 | 7   | 63.06410 | 0.004497934 | Credible Set | purple |
| chr7:63064751 | 7   | 63.06475 | 0.007679605 | Credible Set | purple |
| chr7:63099443 | 7   | 63.09944 | 0.008398832 | Credible Set | purple |
| chr7:63105975 | 7   | 63.10598 | 0.007676573 | Credible Set | purple |
| chr7:63139467 | 7   | 63.13947 | 0.007945851 | Credible Set | purple |
| chr7:63153842 | 7   | 63.15384 | 0.007872096 | Credible Set | purple |
| chr7:63167968 | 7   | 63.16797 | 0.007872096 | Credible Set | purple |
| chr7:63193963 | 7   | 63.19396 | 0.007759763 | Credible Set | purple |
| chr7:63194039 | 7   | 63.19404 | 0.006037196 | Credible Set | purple |
| chr7:63194056 | 7   | 63.19406 | 0.005732830 | Credible Set | purple |
| chr7:63194259 | 7   | 63.19426 | 0.007935149 | Credible Set | purple |
| chr7:63194342 | 7   | 63.19434 | 0.007872096 | Credible Set | purple |
| chr7:63194487 | 7   | 63.19449 | 0.007886203 | Credible Set | purple |
| chr7:63194494 | 7   | 63.19449 | 0.007886203 | Credible Set | purple |
| chr7:63220109 | 7   | 63.22011 | 0.013813942 | Credible Set | purple |
| chr7:63221022 | 7   | 63.22102 | 0.008002939 | Credible Set | purple |
| chr7:63223436 | 7   | 63.22344 | 0.005961252 | Credible Set | purple |
| chr7:63246570 | 7   | 63.24657 | 0.006683077 | Credible Set | purple |
| chr7:63256470 | 7   | 63.25647 | 0.007116144 | Credible Set | purple |
| chr7:63291026 | 7   | 63.29103 | 0.005650557 | Credible Set | purple |
| chr7:63332548 | 7   | 63.33255 | 0.005642547 | Credible Set | purple |
| chr7:63345554 | 7   | 63.34555 | 0.005661611 | Credible Set | purple |
| chr7:63366897 | 7   | 63.36690 | 0.005729901 | Credible Set | purple |
| chr7:63367321 | 7   | 63.36732 | 0.005729901 | Credible Set | purple |
| chr7:63424326 | 7   | 63.42433 | 0.006328016 | Credible Set | purple |
| chr7:63472965 | 7   | 63.47297 | 0.006374090 | Credible Set | purple |
| chr7:63480226 | 7   | 63.48023 | 0.004537845 | Credible Set | purple |
| chr7:63555396 | 7   | 63.55540 | 0.007725729 | Credible Set | purple |
| chr7:63555456 | 7   | 63.55546 | 0.007799817 | Credible Set | purple |
| chr7:63556071 | 7   | 63.55607 | 0.007792293 | Credible Set | purple |
| chr7:63556106 | 7   | 63.55611 | 0.007792293 | Credible Set | purple |
| chr7:63556195 | 7   | 63.55620 | 0.002840500 | Credible Set | purple |
| chr7:63556256 | 7   | 63.55626 | 0.002843255 | Credible Set | purple |

Fine-mapping Regions

| snp           | chr | pos (Mb) | pp          | group        | color  |
|---------------|-----|----------|-------------|--------------|--------|
| chr7:63556415 | 7   | 63.55642 | 0.009769688 | Credible Set | purple |
| chr7:63590413 | 7   | 63.59041 | 0.005388610 | Credible Set | purple |
| chr7:63590941 | 7   | 63.59094 | 0.005365126 | Credible Set | purple |
| chr7:63591000 | 7   | 63.59100 | 0.005214284 | Credible Set | purple |
| chr7:63649222 | 7   | 63.64922 | 0.004414043 | Credible Set | purple |
| chr7:63649227 | 7   | 63.64923 | 0.004306175 | Credible Set | purple |
| chr7:63650750 | 7   | 63.65075 | 0.004683786 | Credible Set | purple |
| chr7:63676214 | 7   | 63.67621 | 0.004782311 | Credible Set | purple |
| chr7:63676590 | 7   | 63.67659 | 0.003980815 | Credible Set | purple |
| chr7:63677624 | 7   | 63.67762 | 0.004767654 | Credible Set | purple |
| chr7:63818257 | 7   | 63.81826 | 0.005387385 | Credible Set | purple |
| chr7:63818340 | 7   | 63.81834 | 0.005490960 | Credible Set | purple |

# F34 GBS, routine CBC mean corpuscular hemoglobin concentration

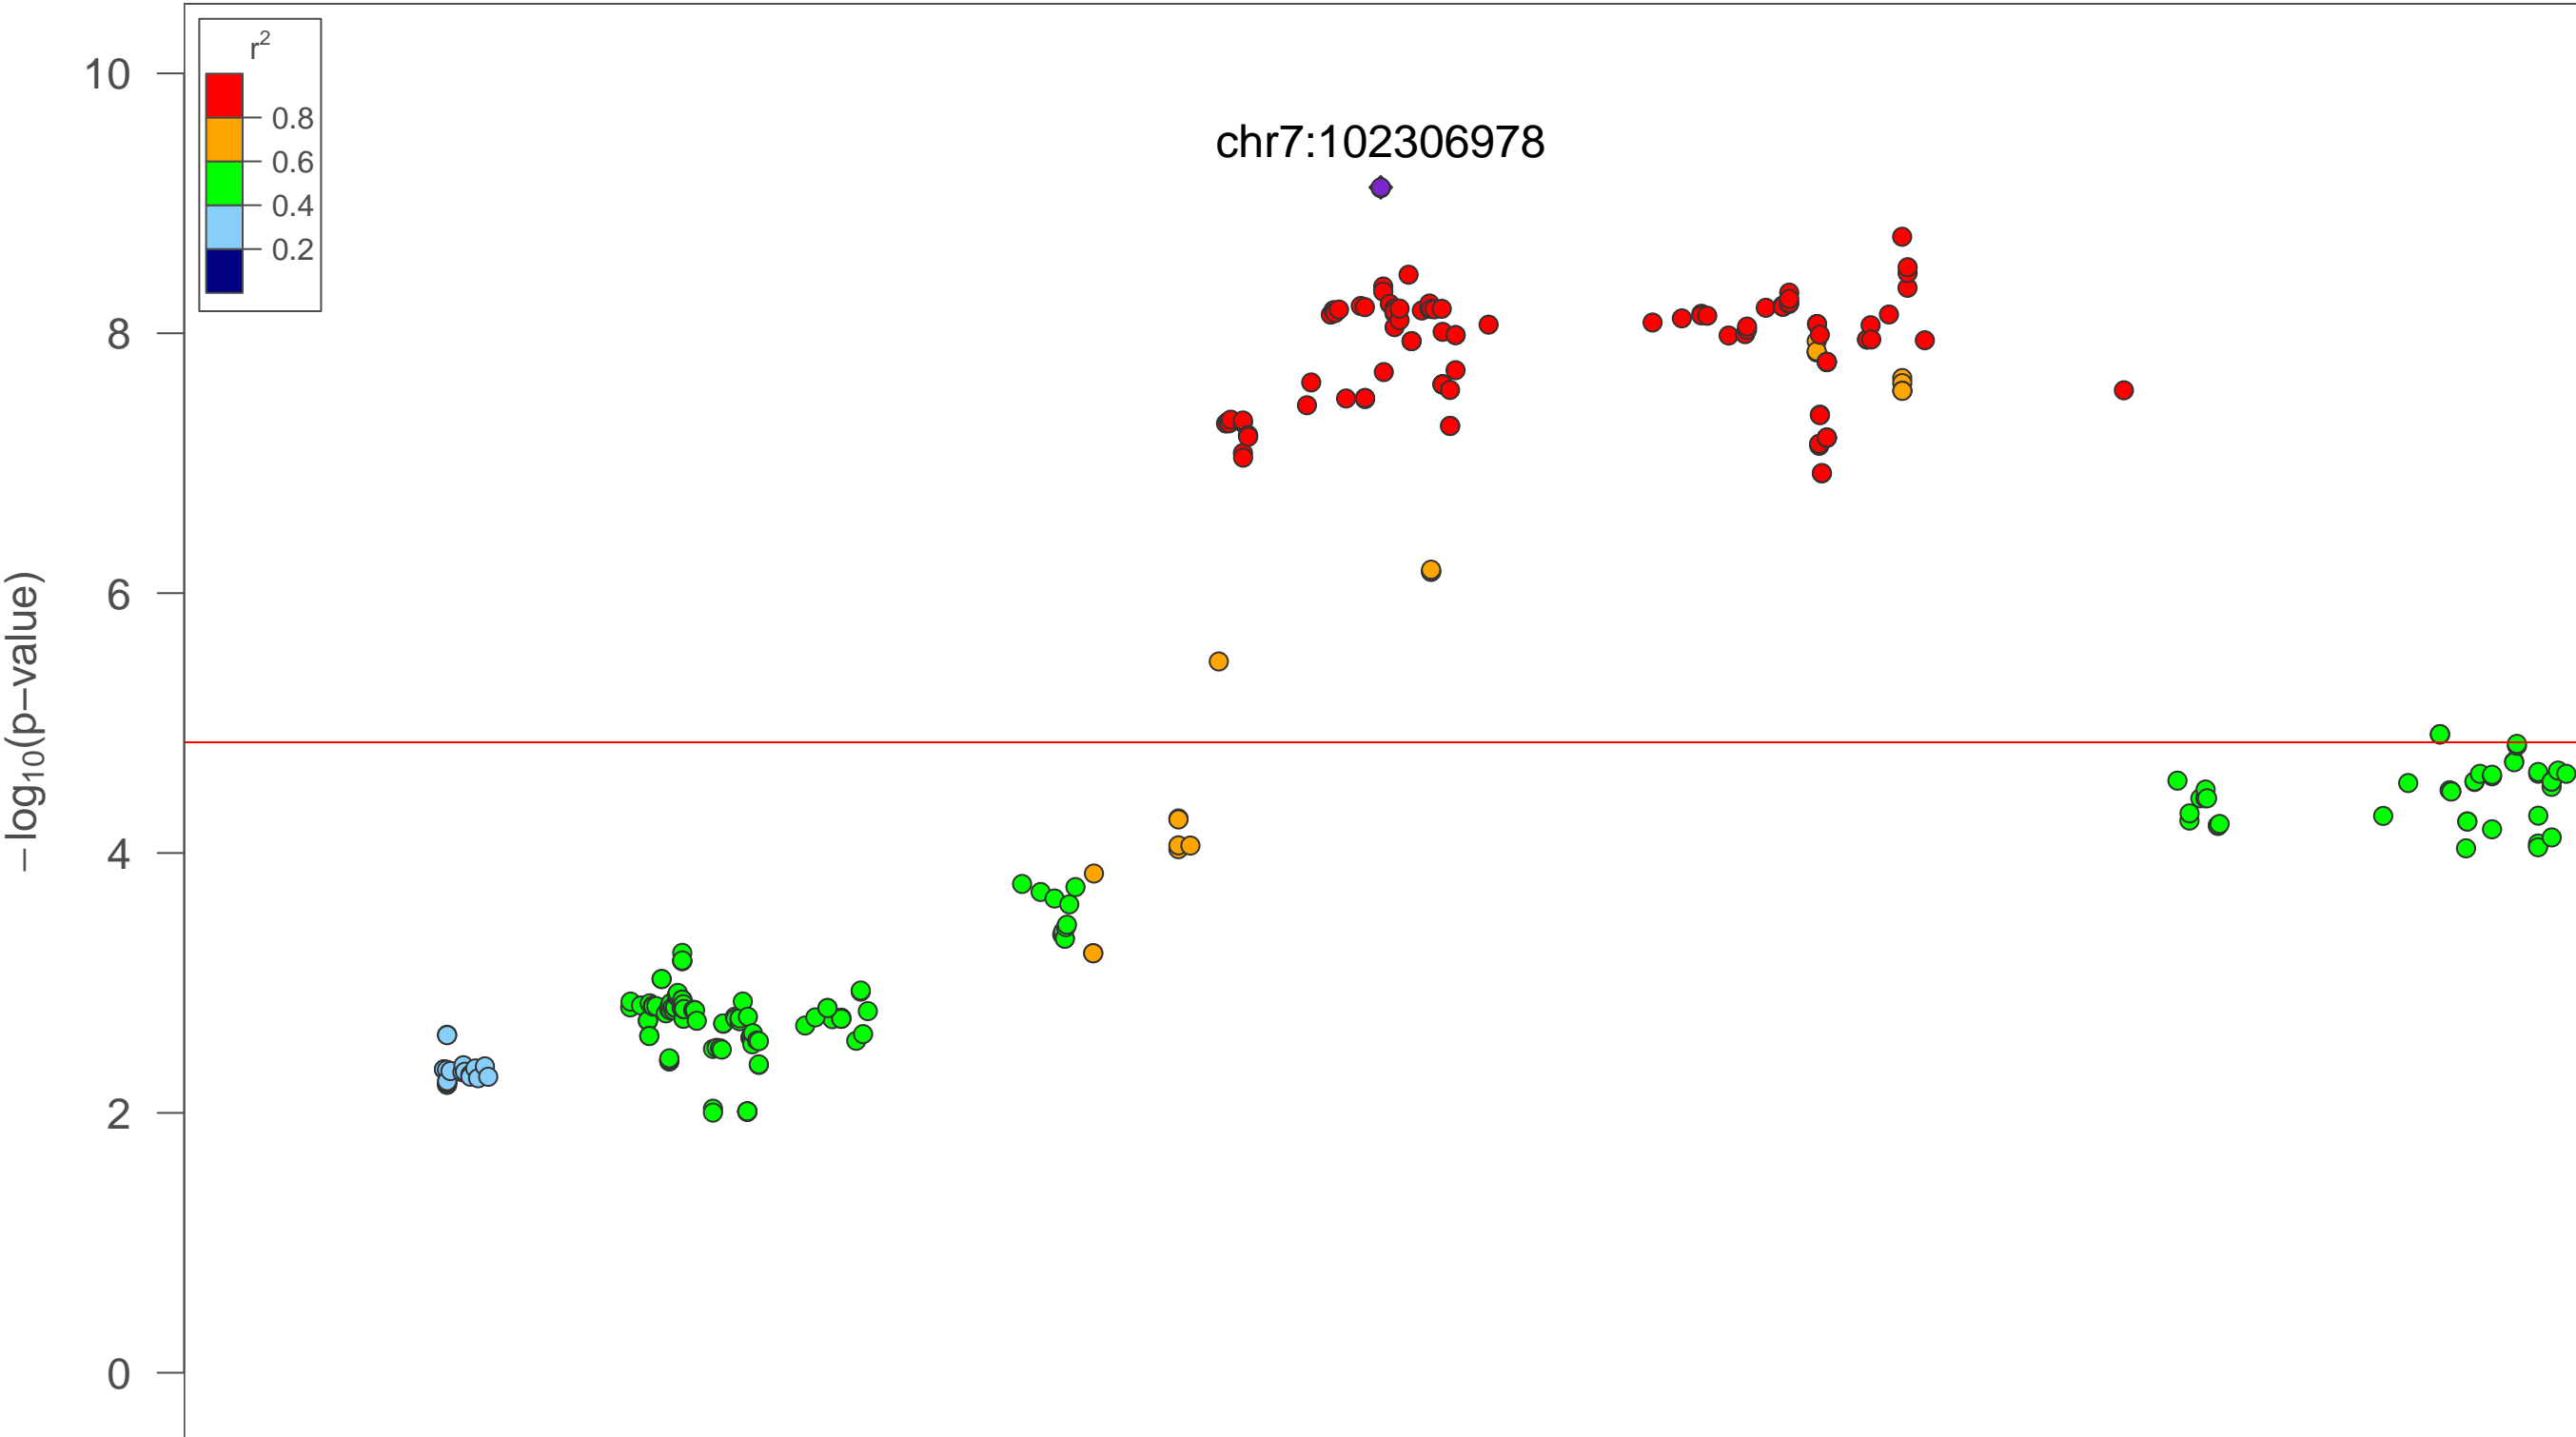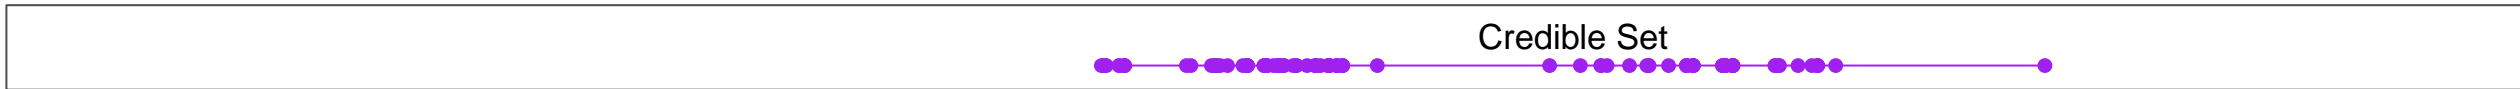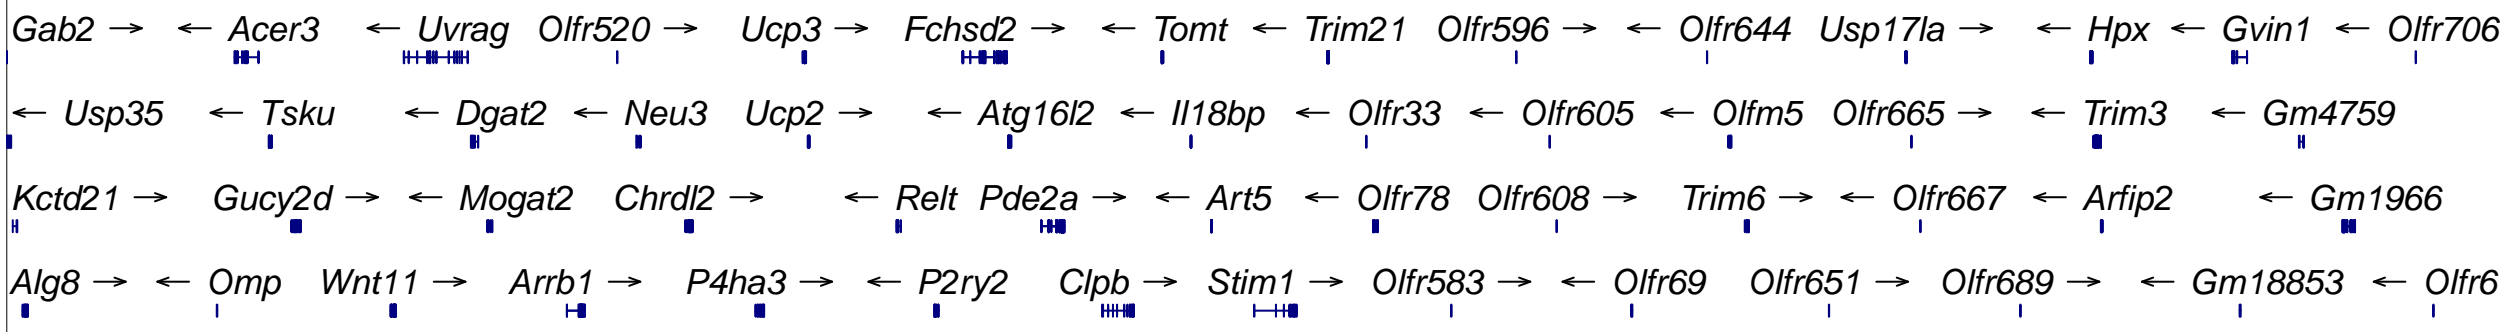

251 genes  
omitted

date: Thu Oct 25 17:11:51 2018

build: F34GBS

display range: chr7:97306978–107306978 [97306978–107306978]

hilite range: 0 – 0 [ 0 – 0 ]

reference SNP: chr7:102306978

number of SNPs plotted: 301

min P-value: 7.53E–10 [chr7:102306978]

max P-value: 9.94E–3 [chr7:99516884]

omitted Genes: Ndufc2, Thrsp, Kctd14

omitted Genes: Ints4, Aamdc, Rsf1

omitted Genes: Rsf1os1, Clns1a, Aqp11

omitted Genes: Pak1, Gdpd4, Myo7a

omitted Genes: Capn5, Gm16938, B3gnt6

omitted Genes: Lrrc32, Emsy, Prkrir

omitted Genes: Gm26705, Map6, Serpinh1

omitted Genes: Gdpd5, Khlh35, Rps3

omitted Genes: Snord15b, Snord15a, Mir326

omitted Genes: Tpbgl, Slco2b1, Olfr521

omitted Genes: Spcs2, Xrra1, Rnf169

omitted Genes: Pold3, Lipt2, Kcne3

omitted Genes: Pgm2l1, Gpx2-ps1, Ppme1

omitted Genes: C2cd3, Dnajb13, Coa4

omitted Genes: Mrpl48, Rab6a, Plekhhb1

omitted Genes: Fam168a, Arhgef17, Mir3102

omitted Genes: P2ry6, Stard10, Arap1

omitted Genes: Mir139, Art2a-ps, Art2b

omitted Genes: Phox2a, Inpp1, Folr2

omitted Genes: Folr1, Anapc15, Lamtor1

omitted Genes: Lrrc51, Numa1, Rnf121

omitted Genes: Xndc1, Xntrpc, Trpc2

omitted Genes: Art1, Chrna10, Nup98

omitted Genes: Pgap2, Rhog, Rrm1

omitted Genes: Olfr543, Olfr544, Olfr545

omitted Genes: Olfr547, Olfr549, Olfr550

omitted Genes: Olfr551, Olfr552, Olfr553

omitted Genes: Olfr554, Olfr555, Olfr556

omitted Genes: Trim68, Olfr557, Olfr558

omitted Genes: Olfr559, Olfr560, Olfr561

omitted Genes: Olfr564, Olfr566, Olfr568

omitted Genes: Olfr569, Olfr570, Olfr571

Make more plots at <http://csg.sph.umich.edu/locuszoom/>

## Fine-mapping Regions

| snp            | chr | pos (Mb) | pp          | group        | color  |
|----------------|-----|----------|-------------|--------------|--------|
| chr7:101660383 | 7   | 101.6604 | 0.001576280 | Credible Set | purple |
| chr7:101669186 | 7   | 101.6692 | 0.001627721 | Credible Set | purple |
| chr7:101673483 | 7   | 101.6735 | 0.001581352 | Credible Set | purple |
| chr7:101680140 | 7   | 101.6801 | 0.001682982 | Credible Set | purple |
| chr7:101731061 | 7   | 101.7311 | 0.001596039 | Credible Set | purple |
| chr7:101731110 | 7   | 101.7311 | 0.001660867 | Credible Set | purple |
| chr7:101751790 | 7   | 101.7518 | 0.001282302 | Credible Set | purple |
| chr7:101752580 | 7   | 101.7526 | 0.001291531 | Credible Set | purple |
| chr7:101752971 | 7   | 101.7530 | 0.001254355 | Credible Set | purple |
| chr7:101998679 | 7   | 101.9987 | 0.002156079 | Credible Set | purple |
| chr7:102016307 | 7   | 102.0163 | 0.003192659 | Credible Set | purple |
| chr7:102098054 | 7   | 102.0981 | 0.010253204 | Credible Set | purple |
| chr7:102110109 | 7   | 102.1101 | 0.011040329 | Credible Set | purple |
| chr7:102110501 | 7   | 102.1105 | 0.011050674 | Credible Set | purple |
| chr7:102116318 | 7   | 102.1163 | 0.010660109 | Credible Set | purple |
| chr7:102116430 | 7   | 102.1164 | 0.010660109 | Credible Set | purple |
| chr7:102116478 | 7   | 102.1165 | 0.010555237 | Credible Set | purple |
| chr7:102132562 | 7   | 102.1326 | 0.011196897 | Credible Set | purple |
| chr7:102162058 | 7   | 102.1621 | 0.002421824 | Credible Set | purple |
| chr7:102223396 | 7   | 102.2234 | 0.011906611 | Credible Set | purple |
| chr7:102240695 | 7   | 102.2407 | 0.011670182 | Credible Set | purple |
| chr7:102241191 | 7   | 102.2412 | 0.002444228 | Credible Set | purple |
| chr7:102241211 | 7   | 102.2412 | 0.002396435 | Credible Set | purple |
| chr7:102241212 | 7   | 102.2412 | 0.002438744 | Credible Set | purple |
| chr7:102306968 | 7   | 102.3070 | 0.090949863 | Credible Set | purple |
| chr7:102306978 | 7   | 102.3070 | 0.092233491 | Credible Set | purple |
| chr7:102317213 | 7   | 102.3172 | 0.016661476 | Credible Set | purple |
| chr7:102317246 | 7   | 102.3172 | 0.015248052 | Credible Set | purple |
| chr7:102319586 | 7   | 102.3196 | 0.003814712 | Credible Set | purple |
| chr7:102344970 | 7   | 102.3450 | 0.012334078 | Credible Set | purple |
| chr7:102363897 | 7   | 102.3639 | 0.011227081 | Credible Set | purple |
| chr7:102364204 | 7   | 102.3642 | 0.010507328 | Credible Set | purple |
| chr7:102364223 | 7   | 102.3642 | 0.011395775 | Credible Set | purple |
| chr7:102364315 | 7   | 102.3643 | 0.010787722 | Credible Set | purple |
| chr7:102364326 | 7   | 102.3643 | 0.010787722 | Credible Set | purple |
| chr7:102364411 | 7   | 102.3644 | 0.008270994 | Credible Set | purple |

## Fine-mapping Regions

| snp            | chr | pos (Mb) | pp          | group        | color  |
|----------------|-----|----------|-------------|--------------|--------|
| chr7:102385520 | 7   | 102.3855 | 0.009325765 | Credible Set | purple |
| chr7:102385536 | 7   | 102.3855 | 0.011386844 | Credible Set | purple |
| chr7:102423165 | 7   | 102.4232 | 0.020416283 | Credible Set | purple |
| chr7:102435692 | 7   | 102.4357 | 0.006496564 | Credible Set | purple |
| chr7:102435720 | 7   | 102.4357 | 0.006496564 | Credible Set | purple |
| chr7:102478469 | 7   | 102.4785 | 0.011012408 | Credible Set | purple |
| chr7:102510475 | 7   | 102.5105 | 0.011340650 | Credible Set | purple |
| chr7:102510607 | 7   | 102.5106 | 0.012432072 | Credible Set | purple |
| chr7:102516878 | 7   | 102.5169 | 0.011305657 | Credible Set | purple |
| chr7:102531652 | 7   | 102.5317 | 0.011241254 | Credible Set | purple |
| chr7:102561708 | 7   | 102.5617 | 0.011341837 | Credible Set | purple |
| chr7:102565262 | 7   | 102.5653 | 0.003088087 | Credible Set | purple |
| chr7:102565292 | 7   | 102.5653 | 0.003093001 | Credible Set | purple |
| chr7:102565307 | 7   | 102.5653 | 0.003081350 | Credible Set | purple |
| chr7:102565323 | 7   | 102.5653 | 0.003086252 | Credible Set | purple |
| chr7:102565329 | 7   | 102.5653 | 0.003086252 | Credible Set | purple |
| chr7:102565410 | 7   | 102.5654 | 0.007625065 | Credible Set | purple |
| chr7:102596442 | 7   | 102.5964 | 0.002803786 | Credible Set | purple |
| chr7:102596578 | 7   | 102.5966 | 0.001512829 | Credible Set | purple |
| chr7:102596636 | 7   | 102.5966 | 0.001510423 | Credible Set | purple |
| chr7:102619418 | 7   | 102.6194 | 0.007215964 | Credible Set | purple |
| chr7:102619431 | 7   | 102.6194 | 0.007203272 | Credible Set | purple |
| chr7:102619466 | 7   | 102.6195 | 0.003940197 | Credible Set | purple |
| chr7:102757499 | 7   | 102.7575 | 0.008632259 | Credible Set | purple |
| chr7:103442570 | 7   | 103.4426 | 0.008952930 | Credible Set | purple |
| chr7:103564836 | 7   | 103.5648 | 0.009614334 | Credible Set | purple |
| chr7:103646439 | 7   | 103.6464 | 0.010419108 | Credible Set | purple |
| chr7:103646709 | 7   | 103.6467 | 0.010119398 | Credible Set | purple |
| chr7:103671033 | 7   | 103.6710 | 0.010059662 | Credible Set | purple |
| chr7:103760301 | 7   | 103.7603 | 0.007158021 | Credible Set | purple |
| chr7:103829200 | 7   | 103.8292 | 0.007327551 | Credible Set | purple |
| chr7:103837099 | 7   | 103.8371 | 0.007894645 | Credible Set | purple |
| chr7:103837213 | 7   | 103.8372 | 0.008350379 | Credible Set | purple |
| chr7:103915503 | 7   | 103.9155 | 0.011543428 | Credible Set | purple |
| chr7:103986792 | 7   | 103.9868 | 0.011984438 | Credible Set | purple |
| chr7:103986795 | 7   | 103.9868 | 0.011984438 | Credible Set | purple |

## Fine-mapping Regions

| snp            | chr | pos (Mb) | pp          | group        | color  |
|----------------|-----|----------|-------------|--------------|--------|
| chr7:103986857 | 7   | 103.9869 | 0.011749707 | Credible Set | purple |
| chr7:103986860 | 7   | 103.9869 | 0.011749707 | Credible Set | purple |
| chr7:104012808 | 7   | 104.0128 | 0.012334102 | Credible Set | purple |
| chr7:104013370 | 7   | 104.0134 | 0.012542197 | Credible Set | purple |
| chr7:104013395 | 7   | 104.0134 | 0.014993762 | Credible Set | purple |
| chr7:104013467 | 7   | 104.0135 | 0.013443169 | Credible Set | purple |
| chr7:104129734 | 7   | 104.1297 | 0.008725313 | Credible Set | purple |
| chr7:104129736 | 7   | 104.1297 | 0.008725313 | Credible Set | purple |
| chr7:104141343 | 7   | 104.1413 | 0.007256169 | Credible Set | purple |
| chr7:104141705 | 7   | 104.1417 | 0.001834794 | Credible Set | purple |
| chr7:104141768 | 7   | 104.1418 | 0.001817733 | Credible Set | purple |
| chr7:104170479 | 7   | 104.1705 | 0.001239540 | Credible Set | purple |
| chr7:104170518 | 7   | 104.1705 | 0.001234318 | Credible Set | purple |
| chr7:104170543 | 7   | 104.1705 | 0.001236844 | Credible Set | purple |
| chr7:104170588 | 7   | 104.1706 | 0.004537395 | Credible Set | purple |
| chr7:104170594 | 7   | 104.1706 | 0.004523155 | Credible Set | purple |
| chr7:104170618 | 7   | 104.1706 | 0.004549326 | Credible Set | purple |
| chr7:104170662 | 7   | 104.1707 | 0.004549326 | Credible Set | purple |
| chr7:104338784 | 7   | 104.3388 | 0.006676217 | Credible Set | purple |
| chr7:104338810 | 7   | 104.3388 | 0.006689773 | Credible Set | purple |
| chr7:104353491 | 7   | 104.3535 | 0.008546463 | Credible Set | purple |
| chr7:104356230 | 7   | 104.3562 | 0.006682156 | Credible Set | purple |
| chr7:104430205 | 7   | 104.4302 | 0.010279656 | Credible Set | purple |
| chr7:104485236 | 7   | 104.4852 | 0.039314262 | Credible Set | purple |
| chr7:104507724 | 7   | 104.5077 | 0.016280612 | Credible Set | purple |
| chr7:104508127 | 7   | 104.5081 | 0.021038879 | Credible Set | purple |
| chr7:104508173 | 7   | 104.5082 | 0.023240353 | Credible Set | purple |
| chr7:104580091 | 7   | 104.5801 | 0.006597281 | Credible Set | purple |
| chr7:105411752 | 7   | 105.4118 | 0.002787939 | Credible Set | purple |



F34 GBS, routine CBC cell hemoglobin concentration mean

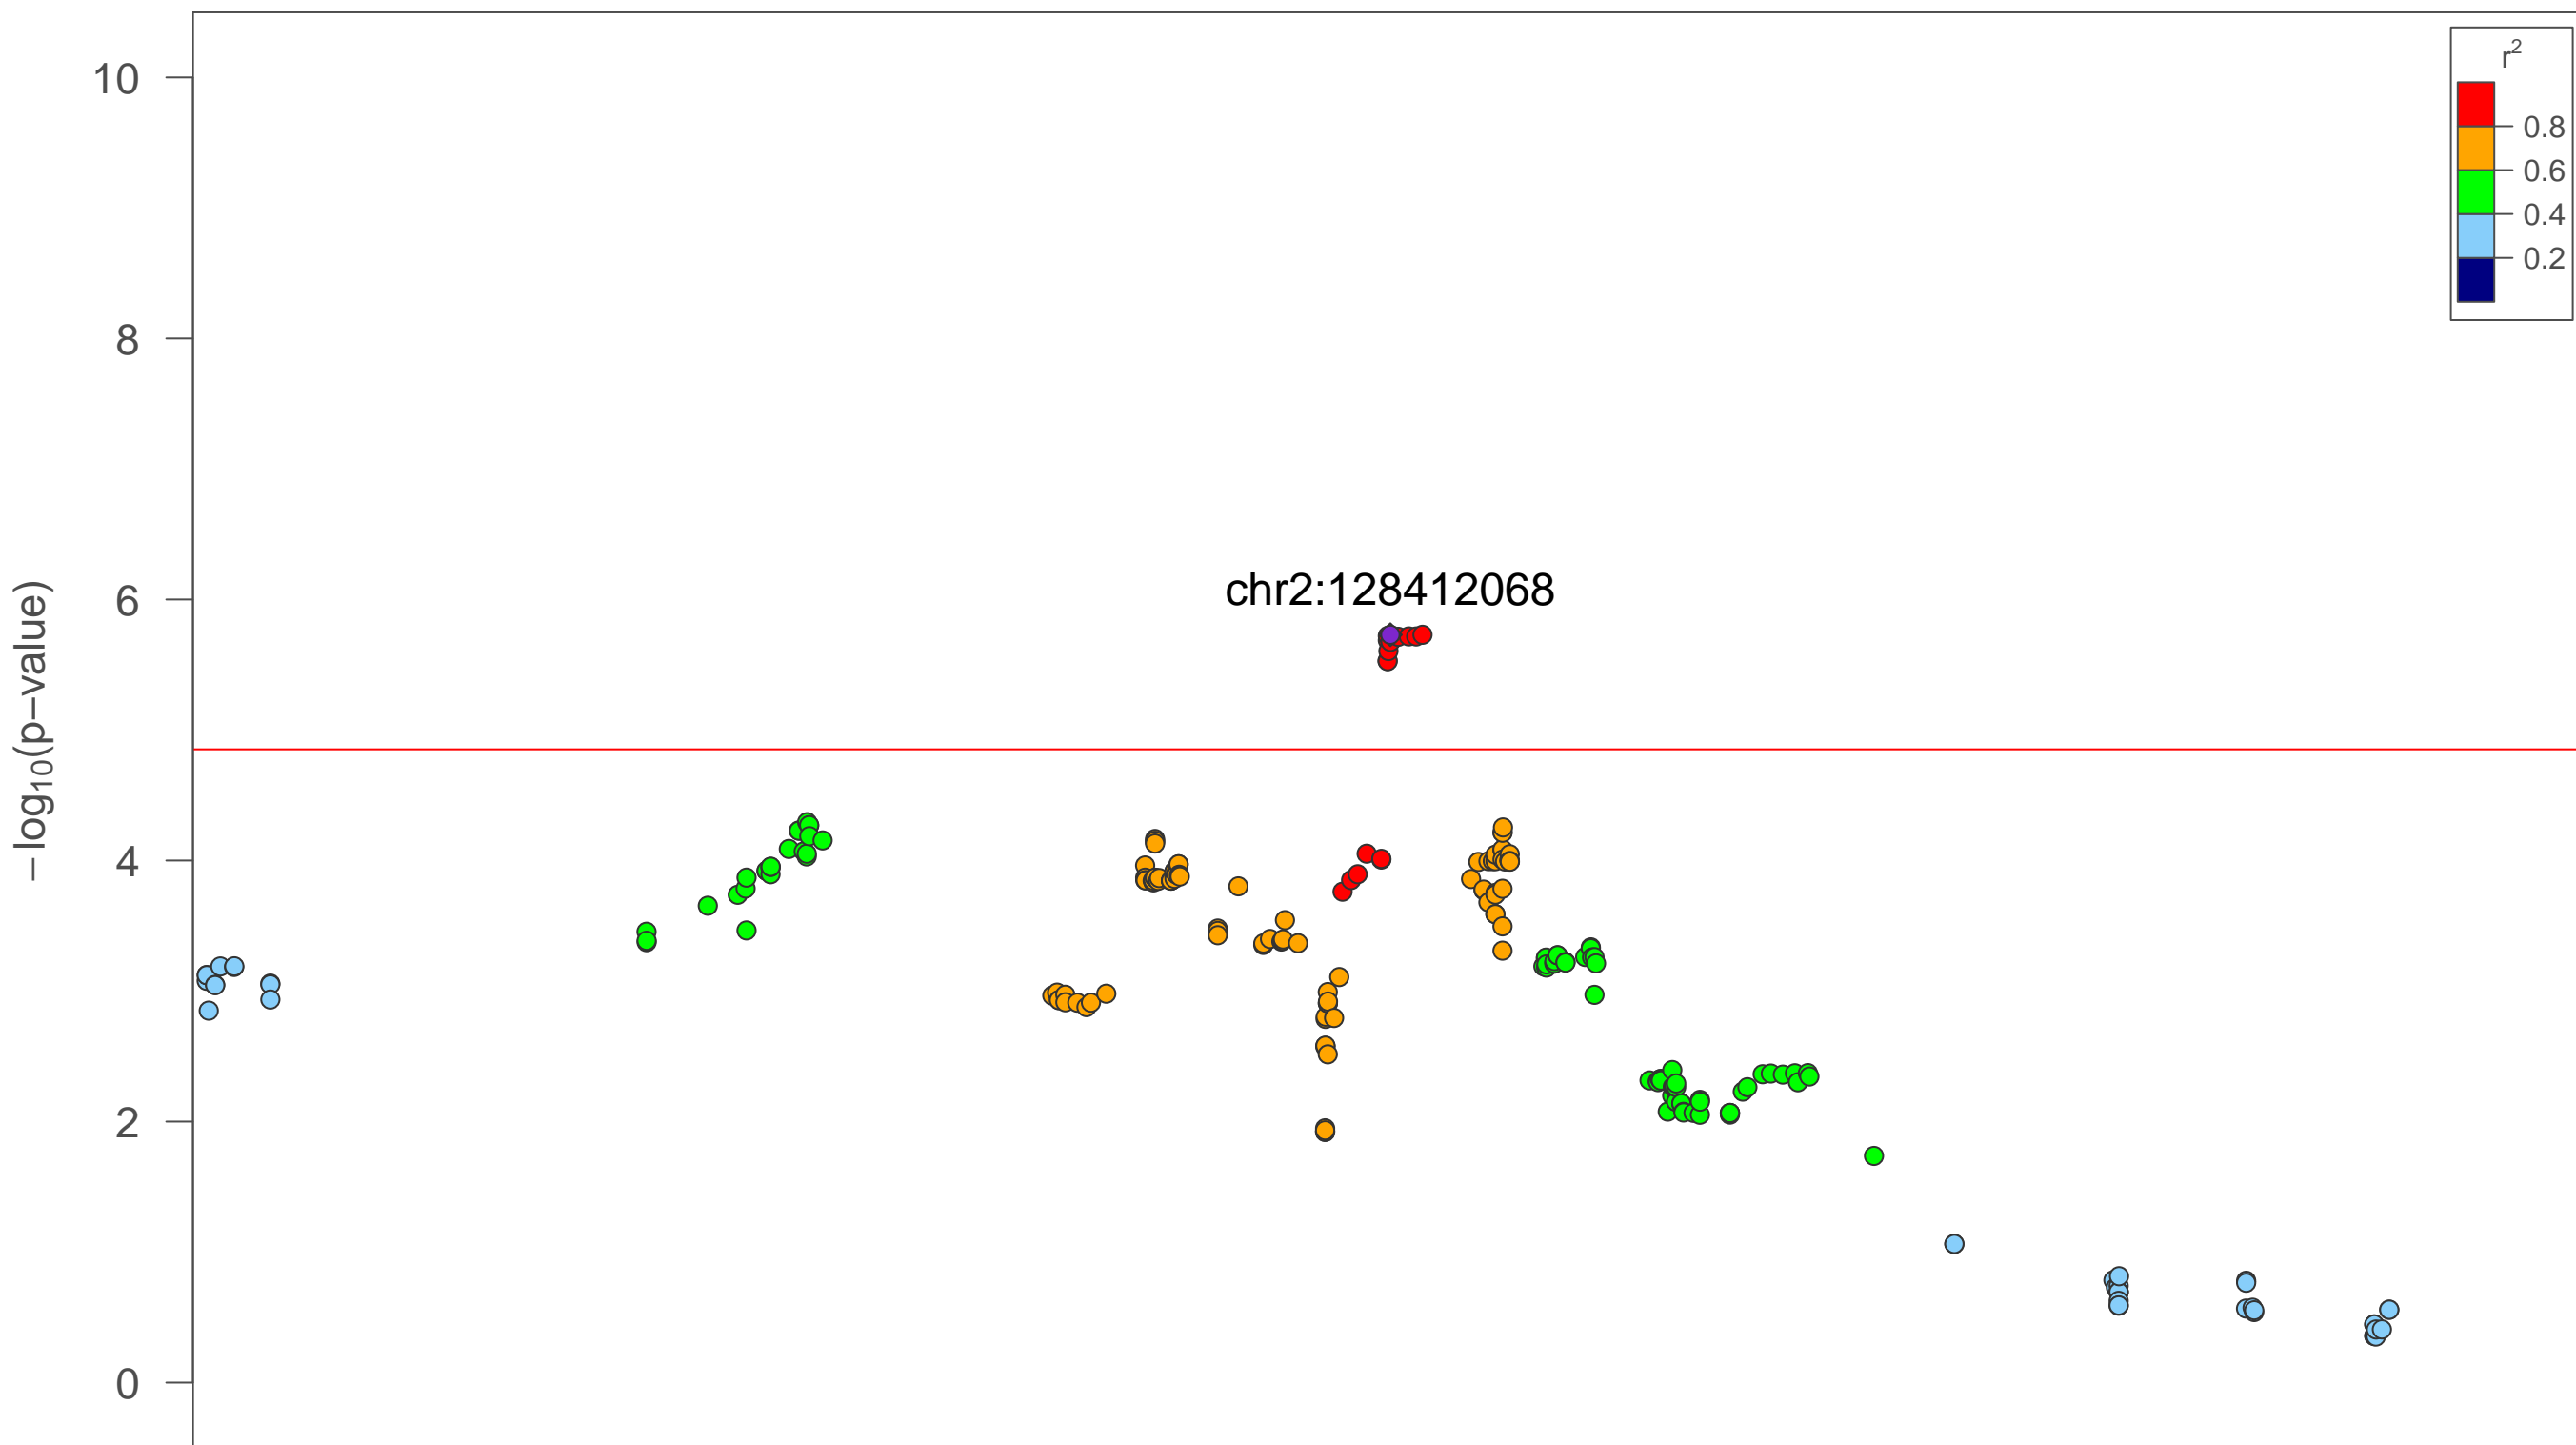

Credible Set

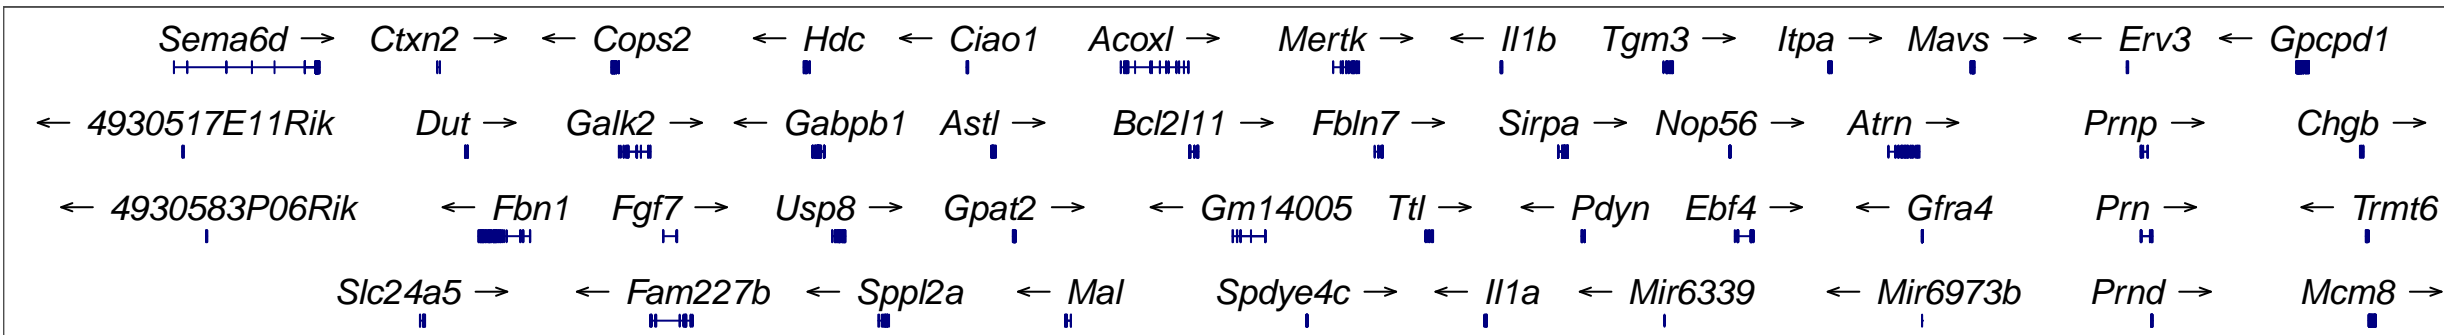

98 genes  
omitted

date: Thu Oct 25 17:12:03 2018

build: F34GBS

display range: chr2:123412068–133412068 [123412068–133412068]

hilite range: 0 – 0 [ 0 – 0 ]

reference SNP: chr2:128412068

number of SNPs plotted: 238

min P-value: 1.86E–6 [chr2:128412068]

max P-value: 4.43E–1 [chr2:132526704]

omitted Genes: Myef2, Slc12a1, Cep152

omitted Genes: Shc4, Eid1, Secisbp2l

omitted Genes: Dtwd1, Atp8b4, Slc27a2

omitted Genes: Usp50, Trpm7, Mir3473g

omitted Genes: Ap4e1, Blvra, Ncaph

omitted Genes: Itpripl1, 1810024B03Rik, Snrnp200

omitted Genes: Tmem127, Stard7, Dusp2

omitted Genes: Adra2b, Fahd2a, Kcnip3

omitted Genes: Prom2, Zfp661, Mrps5

omitted Genes: Mall, Nphp1, 1500011K16Rik

omitted Genes: Bub1, Anapc1, Tmem87b

omitted Genes: Zc3h8, Zc3h6, Polr1b

omitted Genes: Chchd5, Al847159, Slc20a1

omitted Genes: A730036I17Rik, Ckap2l, Gm14023

omitted Genes: Il1bos, F830045P16Rik, 4932416H05Rik

omitted Genes: Stk35, AU015228, Tgm6

omitted Genes: Snrpb, Tmc2, Snord110

omitted Genes: Snord57, Idh3b, Cpxm1

omitted Genes: 1700020A23Rik, Tmem239, Pced1a

omitted Genes: Vps16, Ptpa, 4930473A02Rik

omitted Genes: Mrps26, Oxt, Avp

omitted Genes: Ubox5, Fastkd5, Lzts3

omitted Genes: Ddrgk1, Slc4a11, 4930402H24Rik

omitted Genes: Gm14057, A730017L22Rik, Adam33

omitted Genes: Siglec1, Hspa12b, 1700037H04Rik

omitted Genes: Spef1, Cenpb, Cdc25b

omitted Genes: Ap5s1, Pank2, Mir103–2

omitted Genes: Rnf24, Smox, Adra1d

omitted Genes: 5330413P13Rik, Rassf2, Slc23a2

omitted Genes: Tmem230, Pcna, Cds2

omitted Genes: Prokr2, 4921508D12Rik, 1700026D11Rik

omitted Genes: AU010000, 1110034G24Rik, Crlc1

Make more plots at <http://csg.sph.umich.edu/locuszoom/>

Fine-mapping Regions

| snp            | chr | pos (Mb) | pp          | group        | color  |
|----------------|-----|----------|-------------|--------------|--------|
| chr2:128313171 | 2   | 128.3132 | 0.002552786 | Credible Set | purple |
| chr2:128400308 | 2   | 128.4003 | 0.065190969 | Credible Set | purple |
| chr2:128400919 | 2   | 128.4009 | 0.064934418 | Credible Set | purple |
| chr2:128401561 | 2   | 128.4016 | 0.092386329 | Credible Set | purple |
| chr2:128401595 | 2   | 128.4016 | 0.099703027 | Credible Set | purple |
| chr2:128403982 | 2   | 128.4040 | 0.077076500 | Credible Set | purple |
| chr2:128412068 | 2   | 128.4121 | 0.101536886 | Credible Set | purple |
| chr2:128412554 | 2   | 128.4126 | 0.090071239 | Credible Set | purple |
| chr2:128444910 | 2   | 128.4449 | 0.098108275 | Credible Set | purple |
| chr2:128488809 | 2   | 128.4888 | 0.098785461 | Credible Set | purple |
| chr2:128519692 | 2   | 128.5197 | 0.098656916 | Credible Set | purple |
| chr2:128546244 | 2   | 128.5462 | 0.101523739 | Credible Set | purple |

F34 GBS, routine CBC cell hemoglobin concentration mean

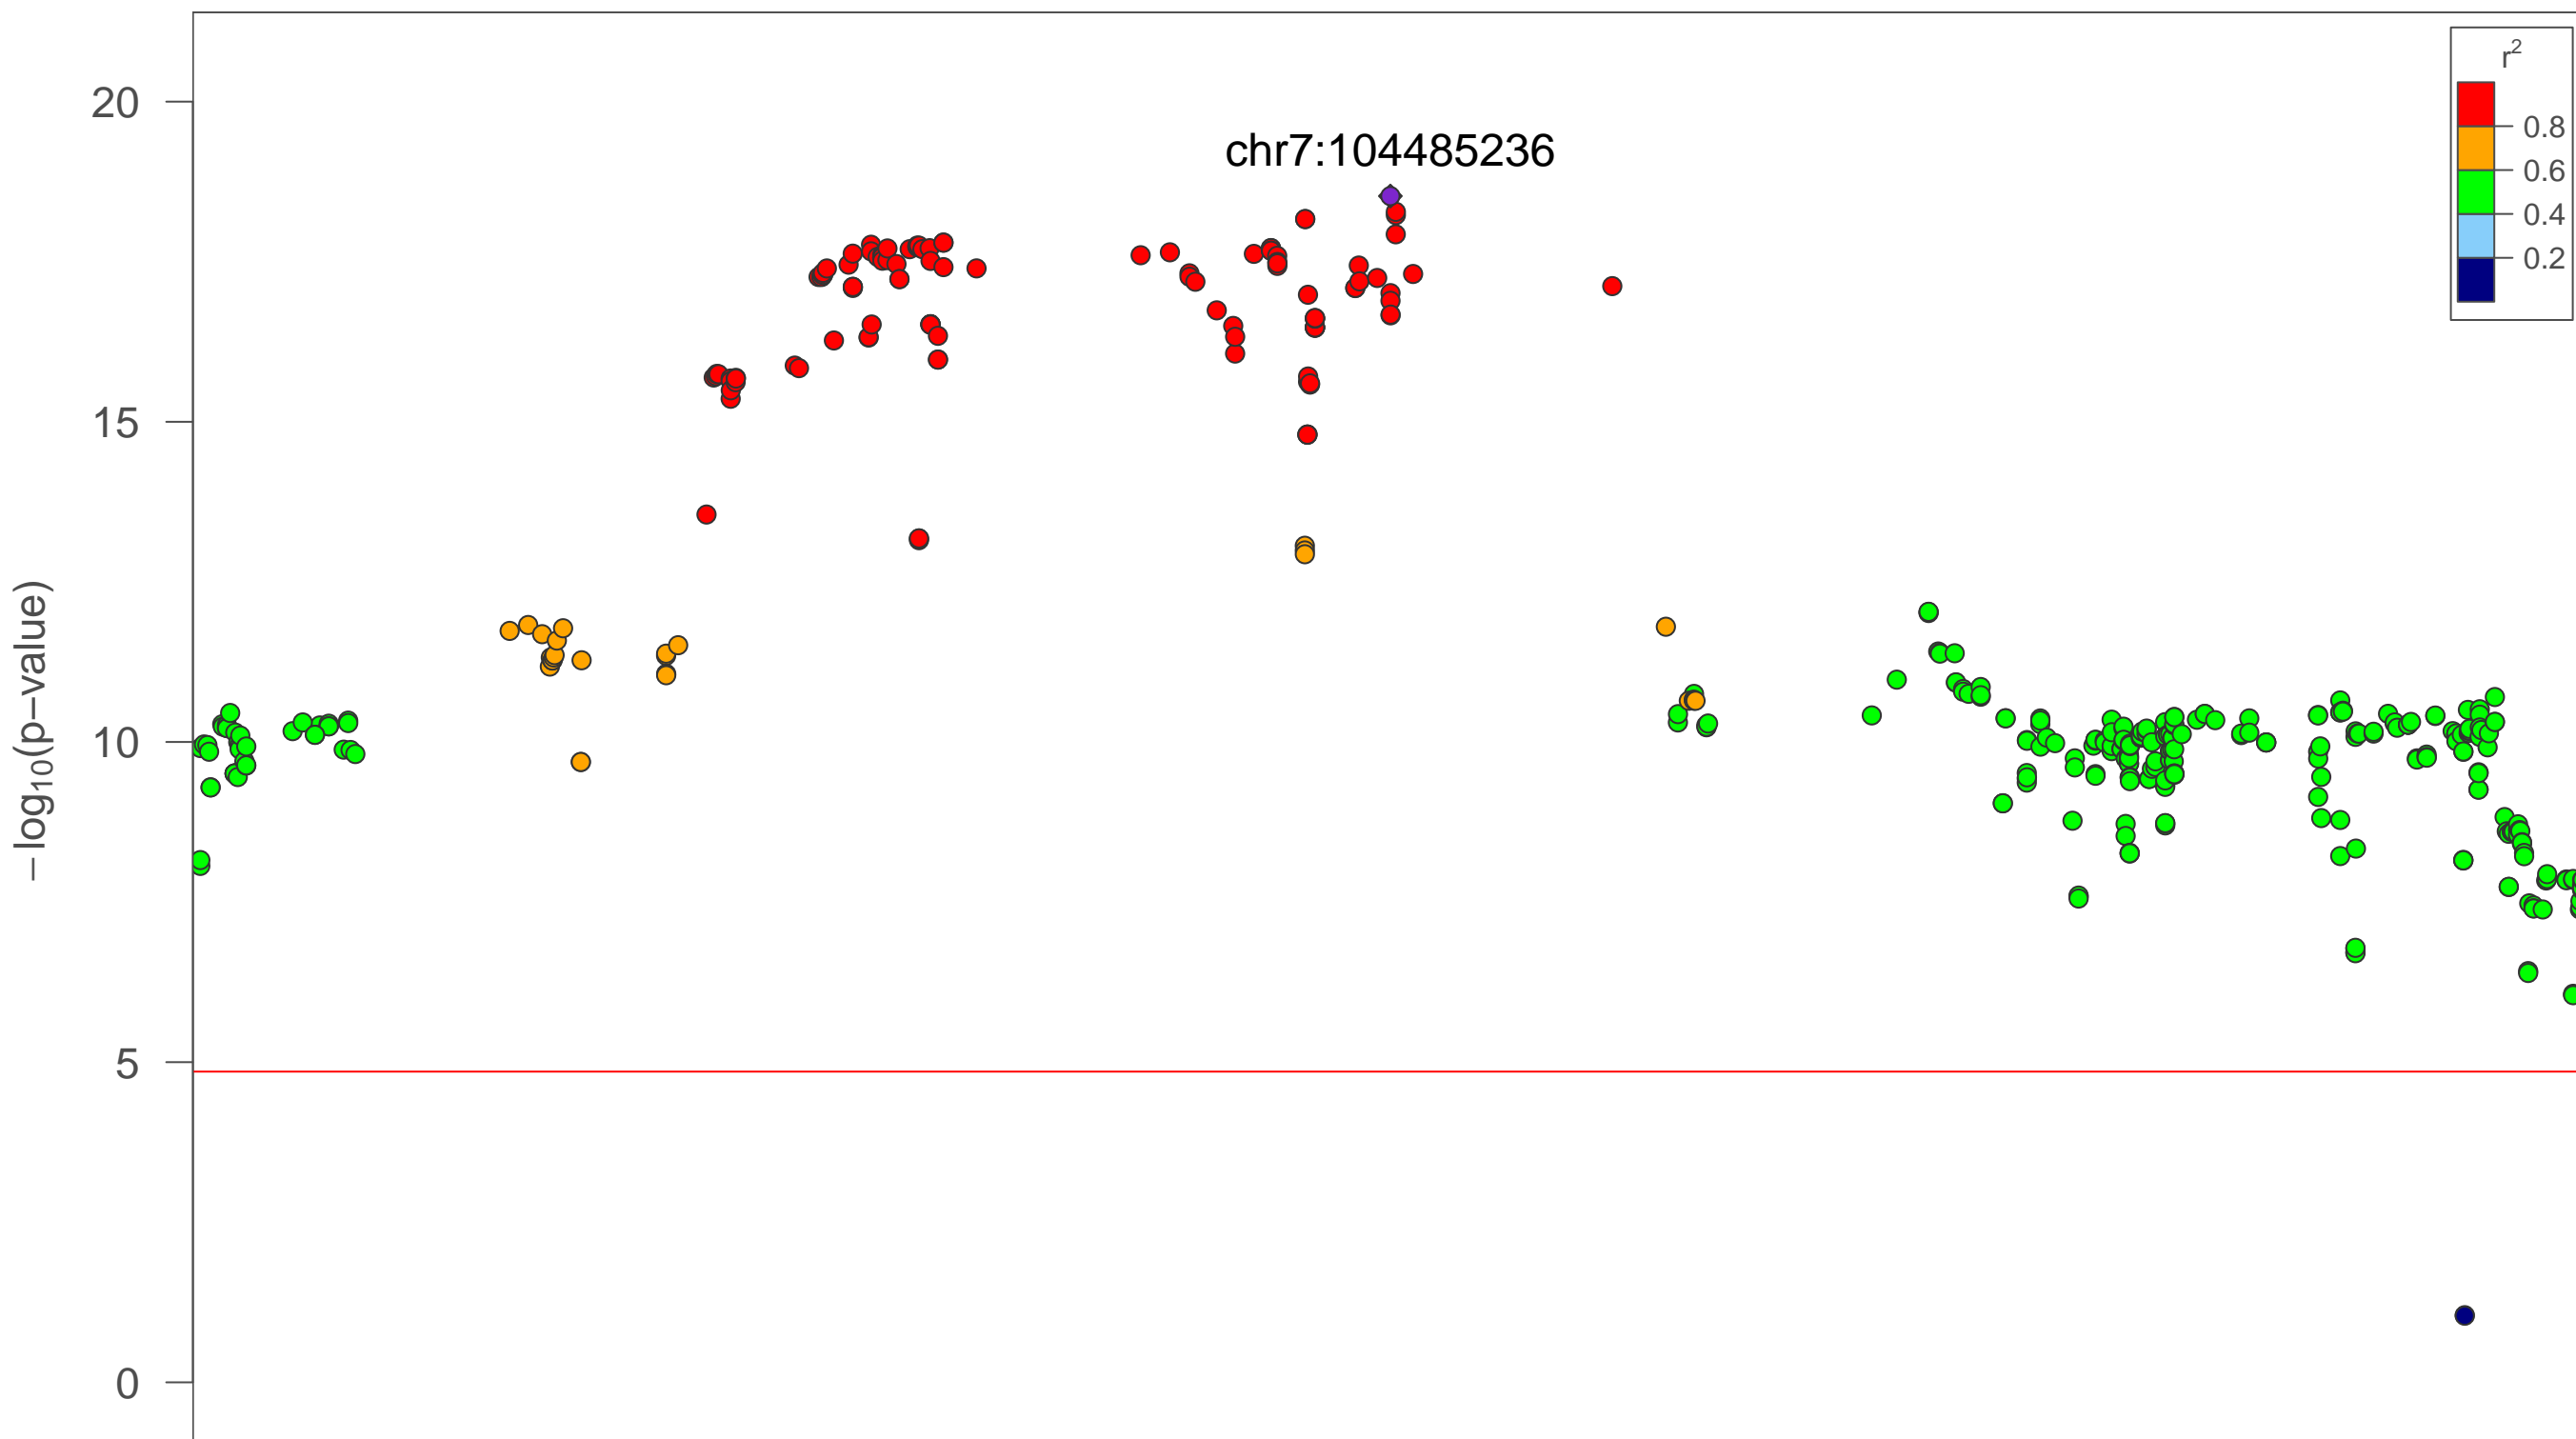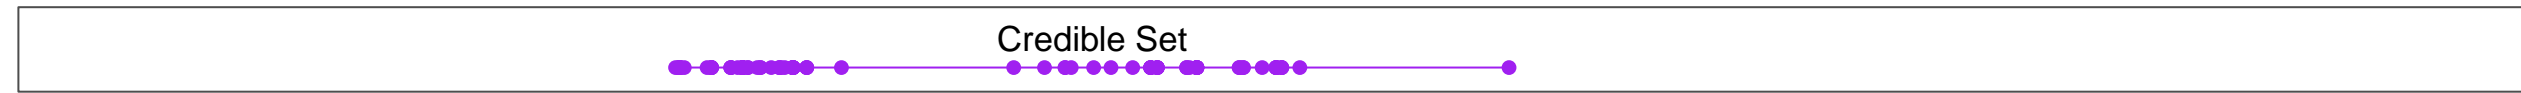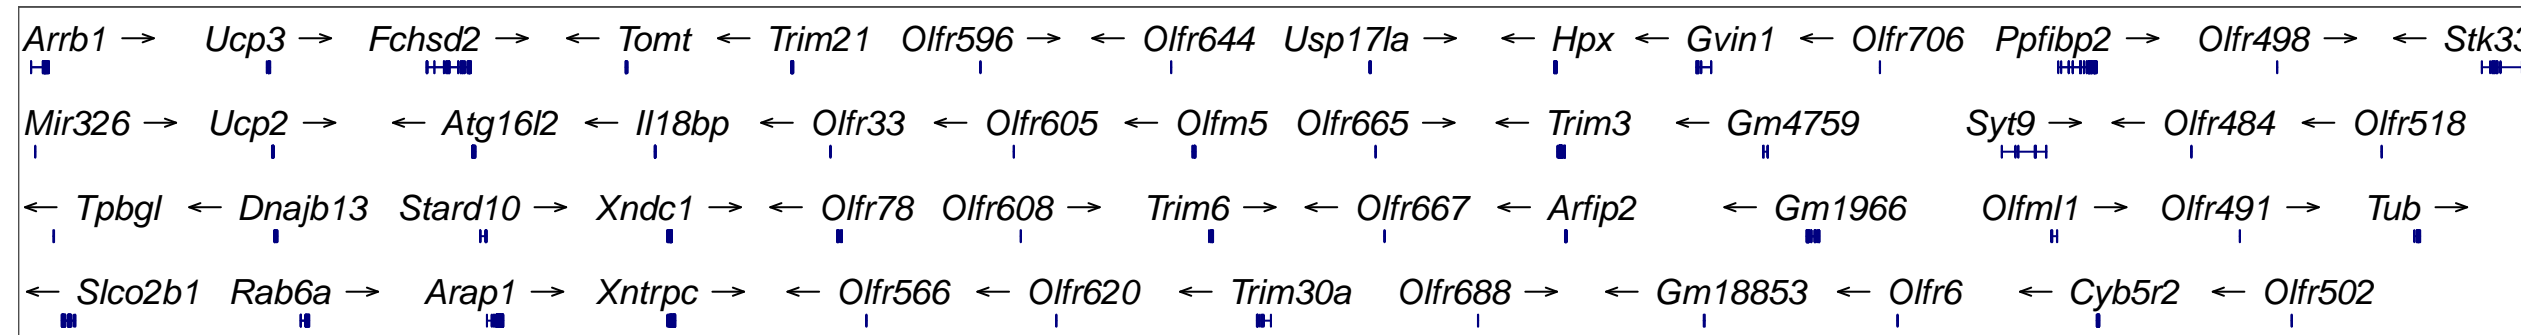

269 genes  
omitted

build: F34GBS

hilite range: 0 – 0 [ 0 – 0 ]

number of SNPs plotted: 448

max P-value: 9.1E-2 [chr7:108970724]

omitted Genes: Spcs2, Xrra1, Rnf169

omitted Genes: Kcne3, Pgm2l1, Gpx2-ps1

omitted Genes: Coa4, Mrpl48, Plekhhb1

omitted Genes: Mir3102, P2ry6, P2ry2

omitted Genes: Art2b, Clpb, Phox2a

omitted Genes: Anapc15, Lamtor1, Lrrc51

omitted Genes: Art5, Art1, Chrna10

omitted Genes: Stim1, Rrm1, Olfr543

omitted Genes: Olfr549, Olfr550, Olfr551

omitted Genes: Olfr555, Olfr556, Trim68

omitted Genes: Olfr557, Olfr558, Olfr559

omitted Genes: Olfr560, Olfr561, Olfr564

omitted Genes: Olfr568, Olfr569, Olfr570

omitted Genes: Olfr571, Olfr572, Olfr574

omitted Genes: Olfr575, Olfr576, Olfr577

omitted Genes: Olfr578, Olfr582, Olfr583

omitted Genes: Olfr584, Olfr585, Olfr586

omitted Genes: Olfr589, Olfr591, Olfr592

omitted Genes: Olfr593, Olfr594, Usp17ld

omitted Genes: Olfr597, Olfr598, Olfr599

omitted Genes: Olfr600, Olfr601, Olfr603

Omitted Genes: Usp17lc, Olfr606, Olfr609

## Fine-mapping Regions

| snp            | chr | pos (Mb) | pp          | group        | color  |
|----------------|-----|----------|-------------|--------------|--------|
| chr7:102098054 | 7   | 102.0981 | 0.005972896 | Credible Set | purple |
| chr7:102110109 | 7   | 102.1101 | 0.006094195 | Credible Set | purple |
| chr7:102110501 | 7   | 102.1105 | 0.005982939 | Credible Set | purple |
| chr7:102116318 | 7   | 102.1163 | 0.006449616 | Credible Set | purple |
| chr7:102116430 | 7   | 102.1164 | 0.006449616 | Credible Set | purple |
| chr7:102116478 | 7   | 102.1165 | 0.006918295 | Credible Set | purple |
| chr7:102132562 | 7   | 102.1326 | 0.008098267 | Credible Set | purple |
| chr7:102223396 | 7   | 102.2234 | 0.009250125 | Credible Set | purple |
| chr7:102240695 | 7   | 102.2407 | 0.013700692 | Credible Set | purple |
| chr7:102241191 | 7   | 102.2412 | 0.004215671 | Credible Set | purple |
| chr7:102241211 | 7   | 102.2412 | 0.004050529 | Credible Set | purple |
| chr7:102241212 | 7   | 102.2412 | 0.004208170 | Credible Set | purple |
| chr7:102317213 | 7   | 102.3172 | 0.018798761 | Credible Set | purple |
| chr7:102317246 | 7   | 102.3172 | 0.014858524 | Credible Set | purple |
| chr7:102319586 | 7   | 102.3196 | 0.001107848 | Credible Set | purple |
| chr7:102344970 | 7   | 102.3450 | 0.012218346 | Credible Set | purple |
| chr7:102363897 | 7   | 102.3639 | 0.011533835 | Credible Set | purple |
| chr7:102364204 | 7   | 102.3642 | 0.011806281 | Credible Set | purple |
| chr7:102364223 | 7   | 102.3642 | 0.013118590 | Credible Set | purple |
| chr7:102364315 | 7   | 102.3643 | 0.012160089 | Credible Set | purple |
| chr7:102364326 | 7   | 102.3643 | 0.012160089 | Credible Set | purple |
| chr7:102364411 | 7   | 102.3644 | 0.010644735 | Credible Set | purple |
| chr7:102385520 | 7   | 102.3855 | 0.010879315 | Credible Set | purple |
| chr7:102385536 | 7   | 102.3855 | 0.016478430 | Credible Set | purple |
| chr7:102423165 | 7   | 102.4232 | 0.009460741 | Credible Set | purple |
| chr7:102435692 | 7   | 102.4357 | 0.005546541 | Credible Set | purple |
| chr7:102435720 | 7   | 102.4357 | 0.005546541 | Credible Set | purple |
| chr7:102478469 | 7   | 102.4785 | 0.016049128 | Credible Set | purple |
| chr7:102510475 | 7   | 102.5105 | 0.017343491 | Credible Set | purple |
| chr7:102510607 | 7   | 102.5106 | 0.018257457 | Credible Set | purple |
| chr7:102516878 | 7   | 102.5169 | 0.018218312 | Credible Set | purple |
| chr7:102531652 | 7   | 102.5317 | 0.016054242 | Credible Set | purple |
| chr7:102561708 | 7   | 102.5617 | 0.016638150 | Credible Set | purple |
| chr7:102565262 | 7   | 102.5653 | 0.001122496 | Credible Set | purple |
| chr7:102565292 | 7   | 102.5653 | 0.001113980 | Credible Set | purple |
| chr7:102565307 | 7   | 102.5653 | 0.001111050 | Credible Set | purple |

## Fine-mapping Regions

| snp            | chr | pos (Mb) | pp           | group        | color  |
|----------------|-----|----------|--------------|--------------|--------|
| chr7:102565323 | 7   | 102.5653 | 0.0011026237 | Credible Set | purple |
| chr7:102565329 | 7   | 102.5653 | 0.0011026237 | Credible Set | purple |
| chr7:102565410 | 7   | 102.5654 | 0.0105738196 | Credible Set | purple |
| chr7:102619418 | 7   | 102.6194 | 0.0202781359 | Credible Set | purple |
| chr7:102619431 | 7   | 102.6194 | 0.0202198054 | Credible Set | purple |
| chr7:102619466 | 7   | 102.6195 | 0.0084858925 | Credible Set | purple |
| chr7:102757499 | 7   | 102.7575 | 0.0081127224 | Credible Set | purple |
| chr7:103442570 | 7   | 103.4426 | 0.0129377802 | Credible Set | purple |
| chr7:103564836 | 7   | 103.5648 | 0.0143513009 | Credible Set | purple |
| chr7:103646439 | 7   | 103.6464 | 0.0068125725 | Credible Set | purple |
| chr7:103646709 | 7   | 103.6467 | 0.0060312839 | Credible Set | purple |
| chr7:103671033 | 7   | 103.6710 | 0.0050477275 | Credible Set | purple |
| chr7:103760301 | 7   | 103.7603 | 0.0018296339 | Credible Set | purple |
| chr7:103829200 | 7   | 103.8292 | 0.0010534099 | Credible Set | purple |
| chr7:103915503 | 7   | 103.9155 | 0.0135794009 | Credible Set | purple |
| chr7:103986792 | 7   | 103.9868 | 0.0166677107 | Credible Set | purple |
| chr7:103986795 | 7   | 103.9868 | 0.0166677107 | Credible Set | purple |
| chr7:103986857 | 7   | 103.9869 | 0.0152014253 | Credible Set | purple |
| chr7:103986860 | 7   | 103.9869 | 0.0152014253 | Credible Set | purple |
| chr7:104012808 | 7   | 104.0128 | 0.0126737350 | Credible Set | purple |
| chr7:104013370 | 7   | 104.0134 | 0.0101781509 | Credible Set | purple |
| chr7:104013395 | 7   | 104.0134 | 0.0088625137 | Credible Set | purple |
| chr7:104013467 | 7   | 104.0135 | 0.0096893227 | Credible Set | purple |
| chr7:104129734 | 7   | 104.1297 | 0.0467498262 | Credible Set | purple |
| chr7:104129736 | 7   | 104.1297 | 0.0467498262 | Credible Set | purple |
| chr7:104141343 | 7   | 104.1413 | 0.0031826073 | Credible Set | purple |
| chr7:104170479 | 7   | 104.1705 | 0.0010029286 | Credible Set | purple |
| chr7:104170506 | 7   | 104.1705 | 0.0010005741 | Credible Set | purple |
| chr7:104170522 | 7   | 104.1705 | 0.0009976148 | Credible Set | purple |
| chr7:104170588 | 7   | 104.1706 | 0.0013779504 | Credible Set | purple |
| chr7:104170594 | 7   | 104.1706 | 0.0013657787 | Credible Set | purple |
| chr7:104170618 | 7   | 104.1706 | 0.0013900693 | Credible Set | purple |
| chr7:104170662 | 7   | 104.1707 | 0.0013900693 | Credible Set | purple |
| chr7:104338784 | 7   | 104.3388 | 0.0040315581 | Credible Set | purple |
| chr7:104338810 | 7   | 104.3388 | 0.0040597580 | Credible Set | purple |
| chr7:104353491 | 7   | 104.3535 | 0.0089776067 | Credible Set | purple |

Fine-mapping Regions

| snp            | chr | pos (Mb) | pp          | group        | color  |
|----------------|-----|----------|-------------|--------------|--------|
| chr7:104356230 | 7   | 104.3562 | 0.005120499 | Credible Set | purple |
| chr7:104430205 | 7   | 104.4302 | 0.005773948 | Credible Set | purple |
| chr7:104485236 | 7   | 104.4852 | 0.105711391 | Credible Set | purple |
| chr7:104485721 | 7   | 104.4857 | 0.003369688 | Credible Set | purple |
| chr7:104485727 | 7   | 104.4857 | 0.002568336 | Credible Set | purple |
| chr7:104486022 | 7   | 104.4860 | 0.001532997 | Credible Set | purple |
| chr7:104486041 | 7   | 104.4860 | 0.001573481 | Credible Set | purple |
| chr7:104507724 | 7   | 104.5077 | 0.027210172 | Credible Set | purple |
| chr7:104508127 | 7   | 104.5081 | 0.053826633 | Credible Set | purple |
| chr7:104508173 | 7   | 104.5082 | 0.060422735 | Credible Set | purple |
| chr7:104580091 | 7   | 104.5801 | 0.006650589 | Credible Set | purple |
| chr7:105411752 | 7   | 105.4118 | 0.004324642 | Credible Set | purple |



F34 GBS, routine CBC red blood cell distribution width

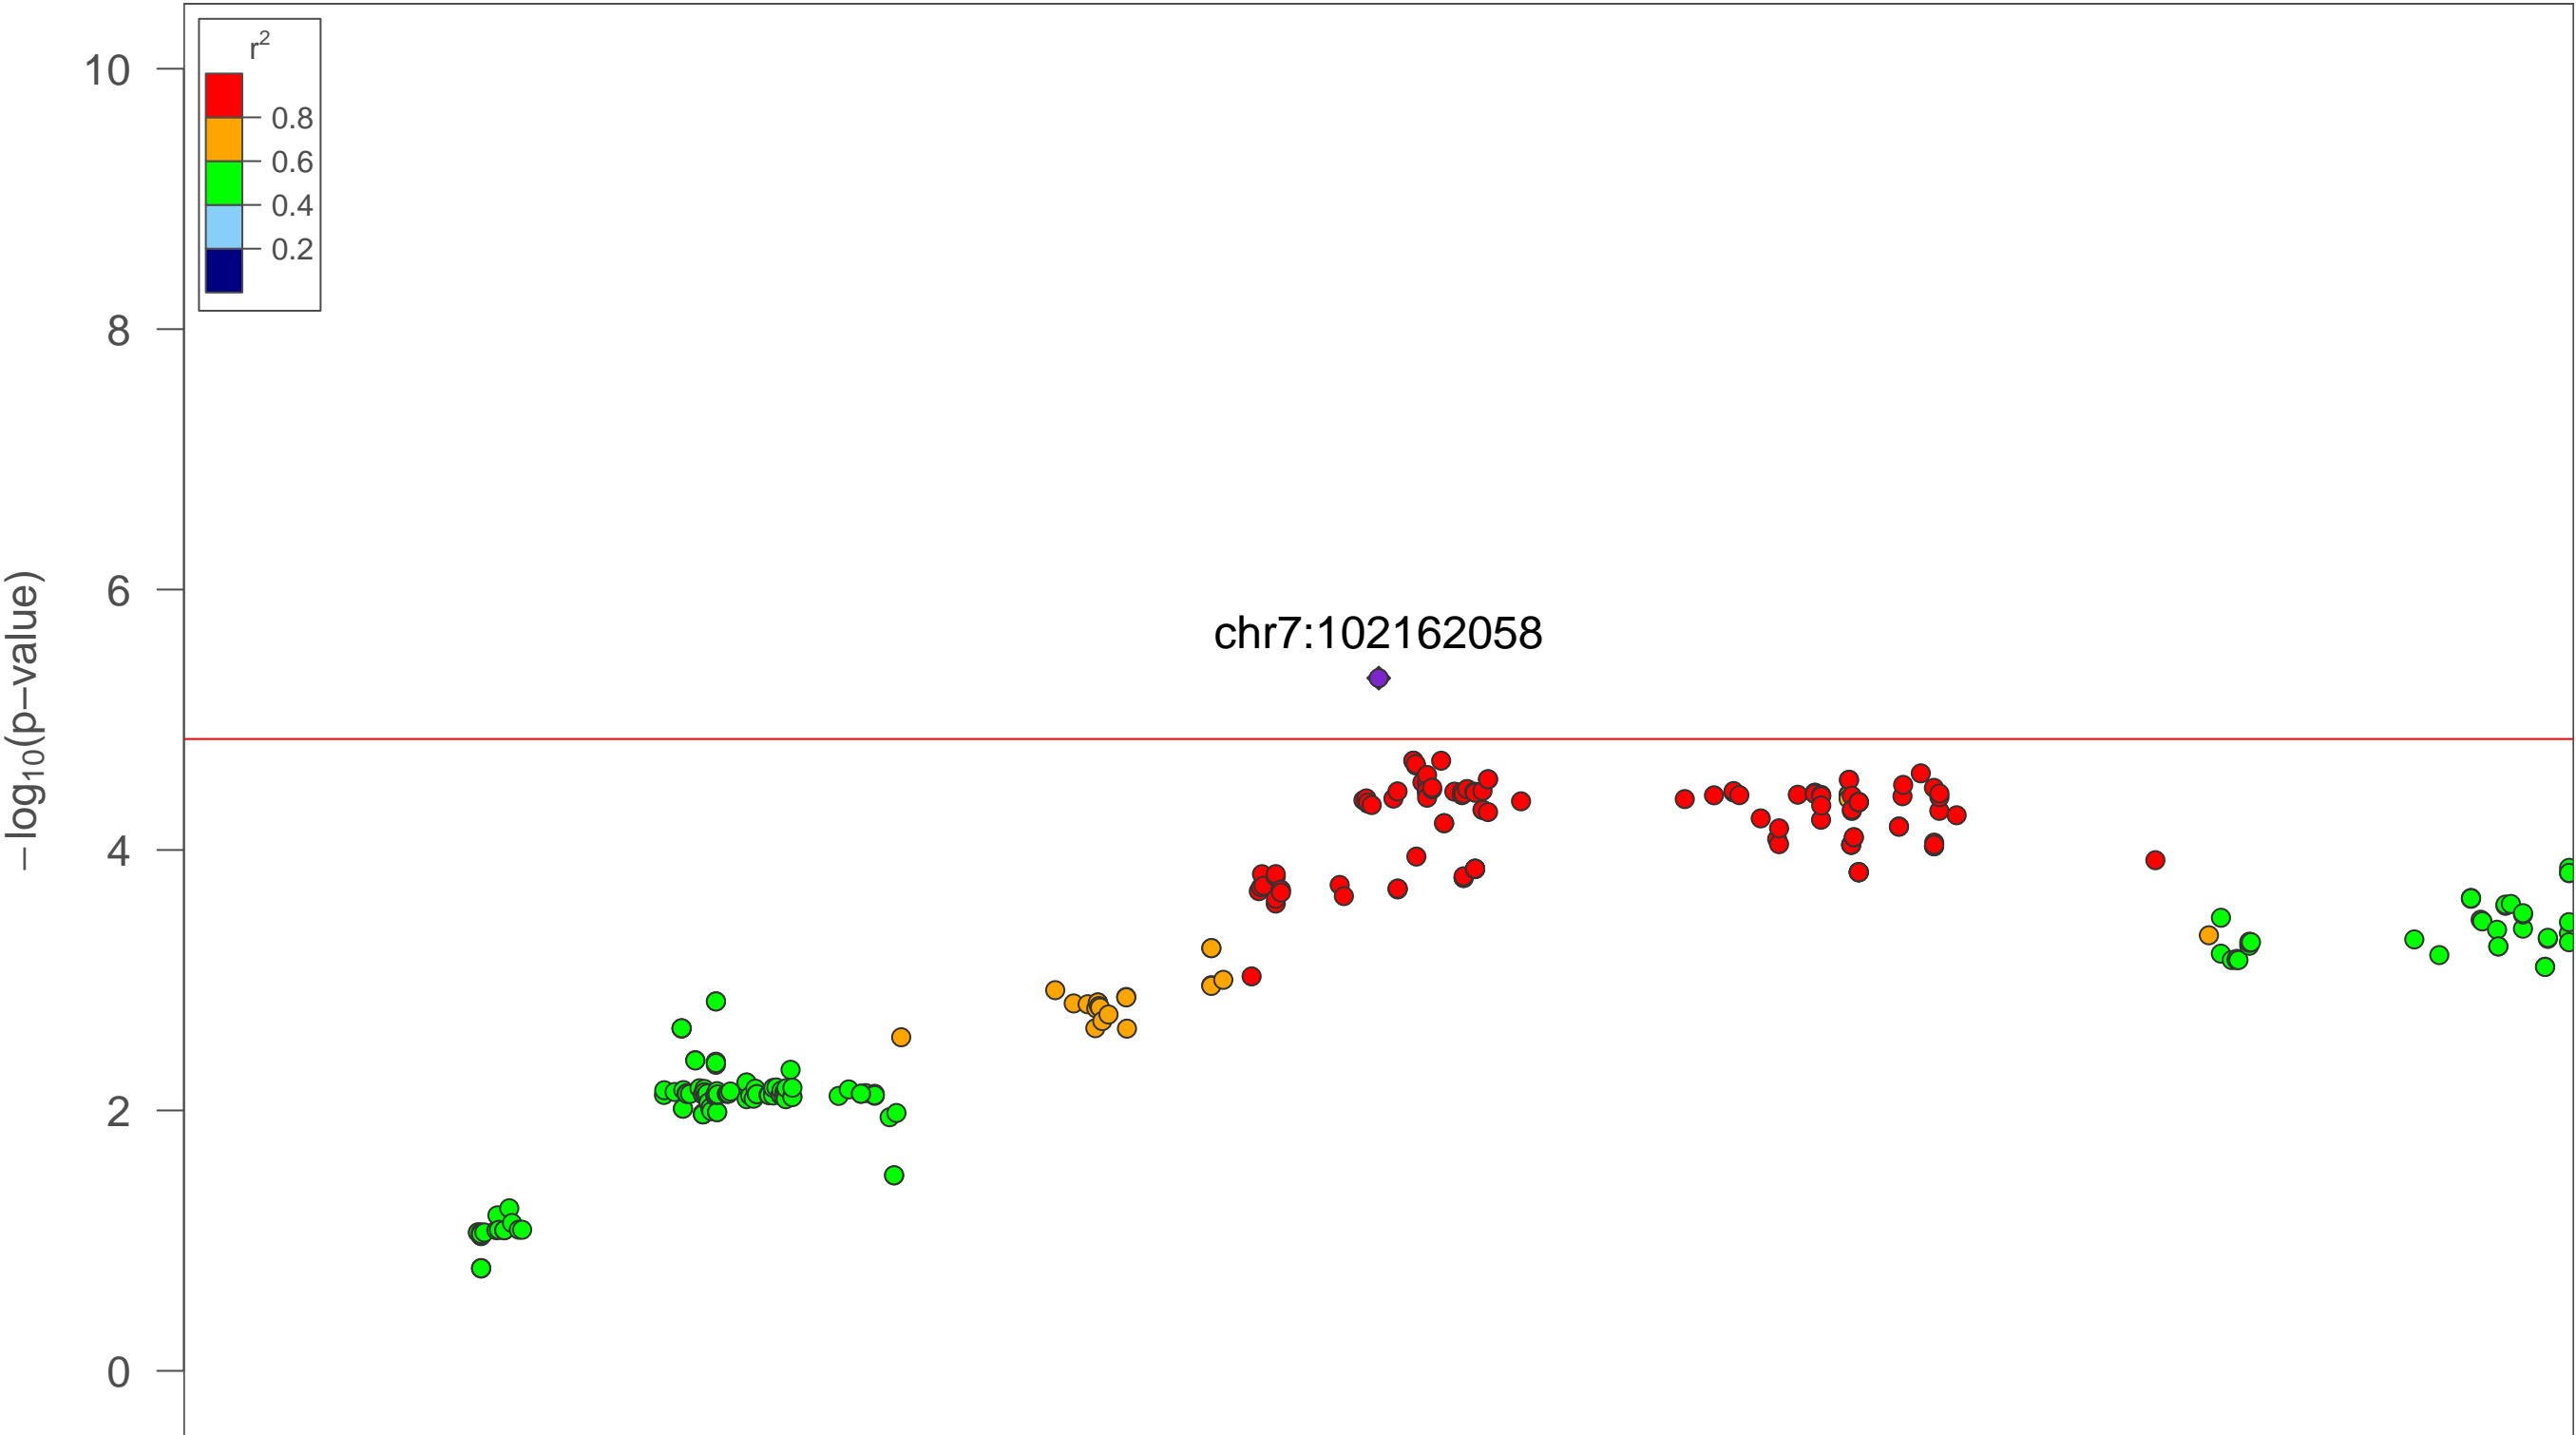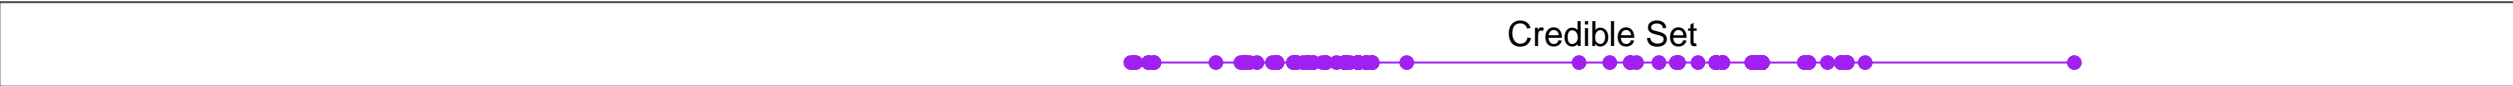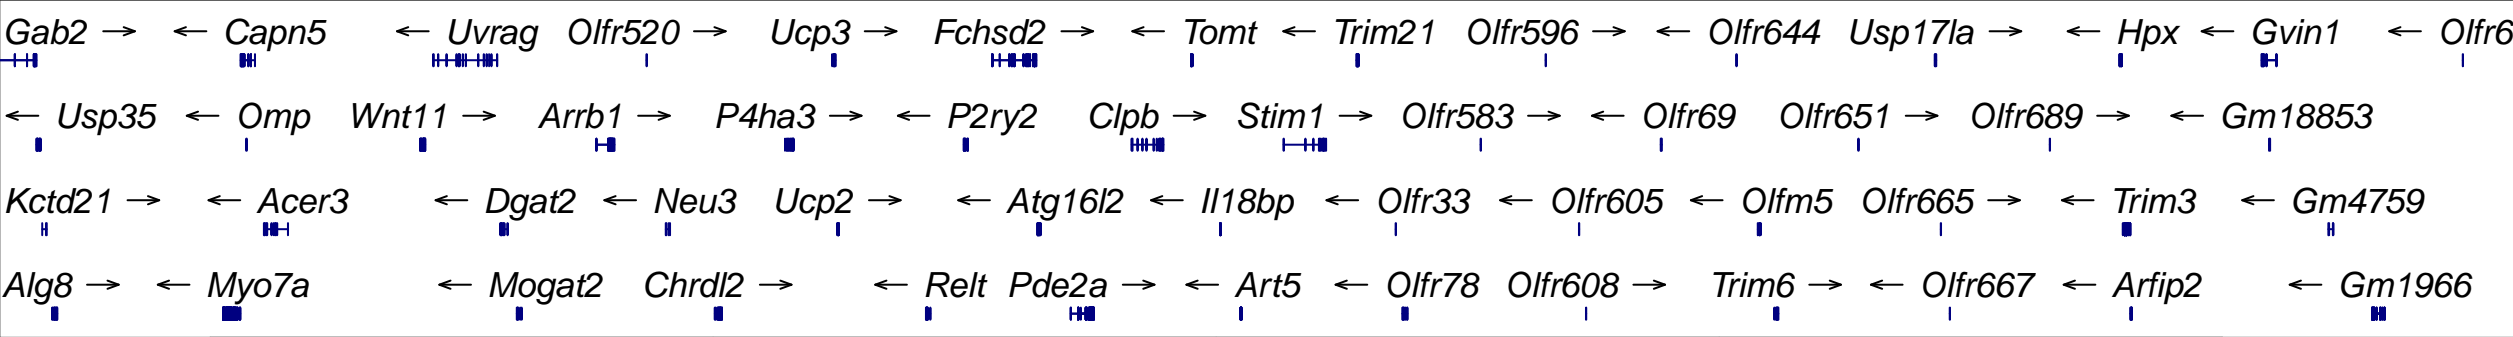

250 genes  
omitted

date: Thu Oct 25 17:12:39 2018

build: F34GBS

display range: chr7:97162058–107162058 [97162058–107162058]

hilite range: 0 – 0 [ 0 – 0 ]

reference SNP: chr7:102162058

number of SNPs plotted: 295

min P-value: 4.78E–6 [chr7:102162058]

max P-value: 1.64E–1 [chr7:98406311]

omitted Genes: Ndufc2, Thrsp, Kctd14

omitted Genes: Ints4, Aamdc, Rsf1

omitted Genes: Rsf1os1, Clns1a, Aqp11

omitted Genes: Pak1, Gdpd4, Gm16938

omitted Genes: B3gnt6, Tsku, Gucy2d

omitted Genes: Lrrc32, Emsy, Prkrir

omitted Genes: Gm26705, Map6, Serpinh1

omitted Genes: Gdpd5, Khlh35, Rps3

omitted Genes: Snord15b, Snord15a, Mir326

omitted Genes: Tpbgl, Slco2b1, Olfr521

omitted Genes: Spcs2, Xrra1, Rnf169

omitted Genes: Pold3, Lipt2, Kcne3

omitted Genes: Pgm2l1, Gpx2-ps1, Ppme1

omitted Genes: C2cd3, Dnajb13, Coa4

omitted Genes: Mrpl48, Rab6a, Plekhhb1

omitted Genes: Fam168a, Arhgef17, Mir3102

omitted Genes: P2ry6, Stard10, Arap1

omitted Genes: Mir139, Art2a-ps, Art2b

omitted Genes: Phox2a, Inpp1, Folr2

omitted Genes: Folr1, Anapc15, Lamtor1

omitted Genes: Lrrc51, Numa1, Rnf121

omitted Genes: Xndc1, Xntrpc, Trpc2

omitted Genes: Art1, Chrna10, Nup98

omitted Genes: Pgap2, Rhog, Rrm1

omitted Genes: Olfr543, Olfr544, Olfr545

omitted Genes: Olfr547, Olfr549, Olfr550

omitted Genes: Olfr551, Olfr552, Olfr553

omitted Genes: Olfr554, Olfr555, Olfr556

omitted Genes: Trim68, Olfr557, Olfr558

omitted Genes: Olfr559, Olfr560, Olfr561

omitted Genes: Olfr564, Olfr566, Olfr568

omitted Genes: Olfr569, Olfr570, Olfr571

Make more plots at <http://csg.sph.umich.edu/locuszoom/>

## Fine-mapping Regions

| snp            | chr | pos (Mb) | pp          | group        | color  |
|----------------|-----|----------|-------------|--------------|--------|
| chr7:101660383 | 7   | 101.6604 | 0.002089386 | Credible Set | purple |
| chr7:101669186 | 7   | 101.6692 | 0.002230006 | Credible Set | purple |
| chr7:101673483 | 7   | 101.6735 | 0.002772393 | Credible Set | purple |
| chr7:101680140 | 7   | 101.6801 | 0.002283530 | Credible Set | purple |
| chr7:101731061 | 7   | 101.7311 | 0.002659947 | Credible Set | purple |
| chr7:101731110 | 7   | 101.7311 | 0.002775208 | Credible Set | purple |
| chr7:101751790 | 7   | 101.7518 | 0.002124253 | Credible Set | purple |
| chr7:101752580 | 7   | 101.7526 | 0.002142424 | Credible Set | purple |
| chr7:101998679 | 7   | 101.9987 | 0.002318842 | Credible Set | purple |
| chr7:102098054 | 7   | 102.0981 | 0.009548508 | Credible Set | purple |
| chr7:102110109 | 7   | 102.1101 | 0.009503956 | Credible Set | purple |
| chr7:102110501 | 7   | 102.1105 | 0.009837912 | Credible Set | purple |
| chr7:102116318 | 7   | 102.1163 | 0.009043904 | Credible Set | purple |
| chr7:102116430 | 7   | 102.1164 | 0.009043904 | Credible Set | purple |
| chr7:102116478 | 7   | 102.1165 | 0.009176579 | Credible Set | purple |
| chr7:102132562 | 7   | 102.1326 | 0.008802086 | Credible Set | purple |
| chr7:102162058 | 7   | 102.1621 | 0.074805787 | Credible Set | purple |
| chr7:102223396 | 7   | 102.2234 | 0.009811606 | Credible Set | purple |
| chr7:102240695 | 7   | 102.2407 | 0.011072285 | Credible Set | purple |
| chr7:102241191 | 7   | 102.2412 | 0.002179105 | Credible Set | purple |
| chr7:102241211 | 7   | 102.2412 | 0.002151102 | Credible Set | purple |
| chr7:102241212 | 7   | 102.2412 | 0.002179322 | Credible Set | purple |
| chr7:102306968 | 7   | 102.3070 | 0.018536215 | Credible Set | purple |
| chr7:102306978 | 7   | 102.3070 | 0.018538116 | Credible Set | purple |
| chr7:102317213 | 7   | 102.3172 | 0.017128207 | Credible Set | purple |
| chr7:102317246 | 7   | 102.3172 | 0.017508287 | Credible Set | purple |
| chr7:102319586 | 7   | 102.3196 | 0.003715643 | Credible Set | purple |
| chr7:102344970 | 7   | 102.3450 | 0.012892797 | Credible Set | purple |
| chr7:102363897 | 7   | 102.3639 | 0.010794577 | Credible Set | purple |
| chr7:102364204 | 7   | 102.3642 | 0.012873946 | Credible Set | purple |
| chr7:102364223 | 7   | 102.3642 | 0.014588118 | Credible Set | purple |
| chr7:102364315 | 7   | 102.3643 | 0.011194140 | Credible Set | purple |
| chr7:102364326 | 7   | 102.3643 | 0.011194140 | Credible Set | purple |
| chr7:102364411 | 7   | 102.3644 | 0.009946970 | Credible Set | purple |
| chr7:102385520 | 7   | 102.3855 | 0.011458601 | Credible Set | purple |
| chr7:102385536 | 7   | 102.3855 | 0.011787086 | Credible Set | purple |

## Fine-mapping Regions

| snp            | chr | pos (Mb) | pp          | group        | color  |
|----------------|-----|----------|-------------|--------------|--------|
| chr7:102423165 | 7   | 102.4232 | 0.018541508 | Credible Set | purple |
| chr7:102435692 | 7   | 102.4357 | 0.006490996 | Credible Set | purple |
| chr7:102435720 | 7   | 102.4357 | 0.006490996 | Credible Set | purple |
| chr7:102478469 | 7   | 102.4785 | 0.011022684 | Credible Set | purple |
| chr7:102510475 | 7   | 102.5105 | 0.010378824 | Credible Set | purple |
| chr7:102510607 | 7   | 102.5106 | 0.010981256 | Credible Set | purple |
| chr7:102516878 | 7   | 102.5169 | 0.010650670 | Credible Set | purple |
| chr7:102517238 | 7   | 102.5172 | 0.002603268 | Credible Set | purple |
| chr7:102517241 | 7   | 102.5172 | 0.002601938 | Credible Set | purple |
| chr7:102517247 | 7   | 102.5172 | 0.002675521 | Credible Set | purple |
| chr7:102531652 | 7   | 102.5317 | 0.011523240 | Credible Set | purple |
| chr7:102561708 | 7   | 102.5617 | 0.011019190 | Credible Set | purple |
| chr7:102565262 | 7   | 102.5653 | 0.003022905 | Credible Set | purple |
| chr7:102565292 | 7   | 102.5653 | 0.003041713 | Credible Set | purple |
| chr7:102565307 | 7   | 102.5653 | 0.003012704 | Credible Set | purple |
| chr7:102565323 | 7   | 102.5653 | 0.003031443 | Credible Set | purple |
| chr7:102565329 | 7   | 102.5653 | 0.003031443 | Credible Set | purple |
| chr7:102565410 | 7   | 102.5654 | 0.010811193 | Credible Set | purple |
| chr7:102596442 | 7   | 102.5964 | 0.011150038 | Credible Set | purple |
| chr7:102596578 | 7   | 102.5966 | 0.008116217 | Credible Set | purple |
| chr7:102596636 | 7   | 102.5966 | 0.008119380 | Credible Set | purple |
| chr7:102619418 | 7   | 102.6194 | 0.013546316 | Credible Set | purple |
| chr7:102619431 | 7   | 102.6194 | 0.013583107 | Credible Set | purple |
| chr7:102619466 | 7   | 102.6195 | 0.007825871 | Credible Set | purple |
| chr7:102757499 | 7   | 102.7575 | 0.009370125 | Credible Set | purple |
| chr7:103442570 | 7   | 103.4426 | 0.009727824 | Credible Set | purple |
| chr7:103564836 | 7   | 103.5648 | 0.010363188 | Credible Set | purple |
| chr7:103646439 | 7   | 103.6464 | 0.010875360 | Credible Set | purple |
| chr7:103646709 | 7   | 103.6467 | 0.011132242 | Credible Set | purple |
| chr7:103671033 | 7   | 103.6710 | 0.010389433 | Credible Set | purple |
| chr7:103760301 | 7   | 103.7603 | 0.007035344 | Credible Set | purple |
| chr7:103829200 | 7   | 103.8292 | 0.004976044 | Credible Set | purple |
| chr7:103837099 | 7   | 103.8371 | 0.004571138 | Credible Set | purple |
| chr7:103837213 | 7   | 103.8372 | 0.005961047 | Credible Set | purple |
| chr7:103915503 | 7   | 103.9155 | 0.010463737 | Credible Set | purple |
| chr7:103986792 | 7   | 103.9868 | 0.010812874 | Credible Set | purple |

## Fine-mapping Regions

| snp            | chr | pos (Mb) | pp          | group        | color  |
|----------------|-----|----------|-------------|--------------|--------|
| chr7:103986795 | 7   | 103.9868 | 0.010812874 | Credible Set | purple |
| chr7:103986857 | 7   | 103.9869 | 0.010624554 | Credible Set | purple |
| chr7:103986860 | 7   | 103.9869 | 0.010624554 | Credible Set | purple |
| chr7:104012808 | 7   | 104.0128 | 0.006875938 | Credible Set | purple |
| chr7:104013370 | 7   | 104.0134 | 0.010436535 | Credible Set | purple |
| chr7:104013395 | 7   | 104.0134 | 0.010211190 | Credible Set | purple |
| chr7:104013467 | 7   | 104.0135 | 0.008727574 | Credible Set | purple |
| chr7:104129734 | 7   | 104.1297 | 0.013437577 | Credible Set | purple |
| chr7:104129736 | 7   | 104.1297 | 0.013437577 | Credible Set | purple |
| chr7:104138934 | 7   | 104.1389 | 0.004518107 | Credible Set | purple |
| chr7:104138936 | 7   | 104.1389 | 0.004528438 | Credible Set | purple |
| chr7:104138968 | 7   | 104.1390 | 0.004528438 | Credible Set | purple |
| chr7:104141343 | 7   | 104.1413 | 0.010287885 | Credible Set | purple |
| chr7:104141705 | 7   | 104.1417 | 0.007971042 | Credible Set | purple |
| chr7:104141768 | 7   | 104.1418 | 0.008141437 | Credible Set | purple |
| chr7:104149893 | 7   | 104.1499 | 0.005108275 | Credible Set | purple |
| chr7:104149911 | 7   | 104.1499 | 0.005143698 | Credible Set | purple |
| chr7:104170479 | 7   | 104.1705 | 0.009227558 | Credible Set | purple |
| chr7:104170506 | 7   | 104.1705 | 0.009263429 | Credible Set | purple |
| chr7:104170518 | 7   | 104.1705 | 0.009227143 | Credible Set | purple |
| chr7:104170522 | 7   | 104.1705 | 0.009254306 | Credible Set | purple |
| chr7:104170543 | 7   | 104.1705 | 0.009248551 | Credible Set | purple |
| chr7:104170588 | 7   | 104.1706 | 0.002873580 | Credible Set | purple |
| chr7:104170594 | 7   | 104.1706 | 0.002857667 | Credible Set | purple |
| chr7:104170618 | 7   | 104.1706 | 0.002863148 | Credible Set | purple |
| chr7:104170662 | 7   | 104.1707 | 0.002863148 | Credible Set | purple |
| chr7:104338784 | 7   | 104.3388 | 0.006147177 | Credible Set | purple |
| chr7:104338810 | 7   | 104.3388 | 0.006117691 | Credible Set | purple |
| chr7:104353491 | 7   | 104.3535 | 0.010200340 | Credible Set | purple |
| chr7:104356230 | 7   | 104.3562 | 0.012345949 | Credible Set | purple |
| chr7:104430205 | 7   | 104.4302 | 0.014991492 | Credible Set | purple |
| chr7:104485236 | 7   | 104.4852 | 0.011749030 | Credible Set | purple |
| chr7:104485721 | 7   | 104.4857 | 0.004407447 | Credible Set | purple |
| chr7:104485727 | 7   | 104.4857 | 0.004419985 | Credible Set | purple |
| chr7:104486022 | 7   | 104.4860 | 0.004691478 | Credible Set | purple |
| chr7:104486041 | 7   | 104.4860 | 0.004526093 | Credible Set | purple |

Fine-mapping Regions

| snp            | chr | pos (Mb) | pp          | group        | color  |
|----------------|-----|----------|-------------|--------------|--------|
| chr7:104507724 | 7   | 104.5077 | 0.007987074 | Credible Set | purple |
| chr7:104508127 | 7   | 104.5081 | 0.010042658 | Credible Set | purple |
| chr7:104508173 | 7   | 104.5082 | 0.010682151 | Credible Set | purple |
| chr7:104580091 | 7   | 104.5801 | 0.007416009 | Credible Set | purple |
| chr7:105411752 | 7   | 105.4118 | 0.003497803 | Credible Set | purple |

F34 GBS, routine CBC red blood cell distribution width

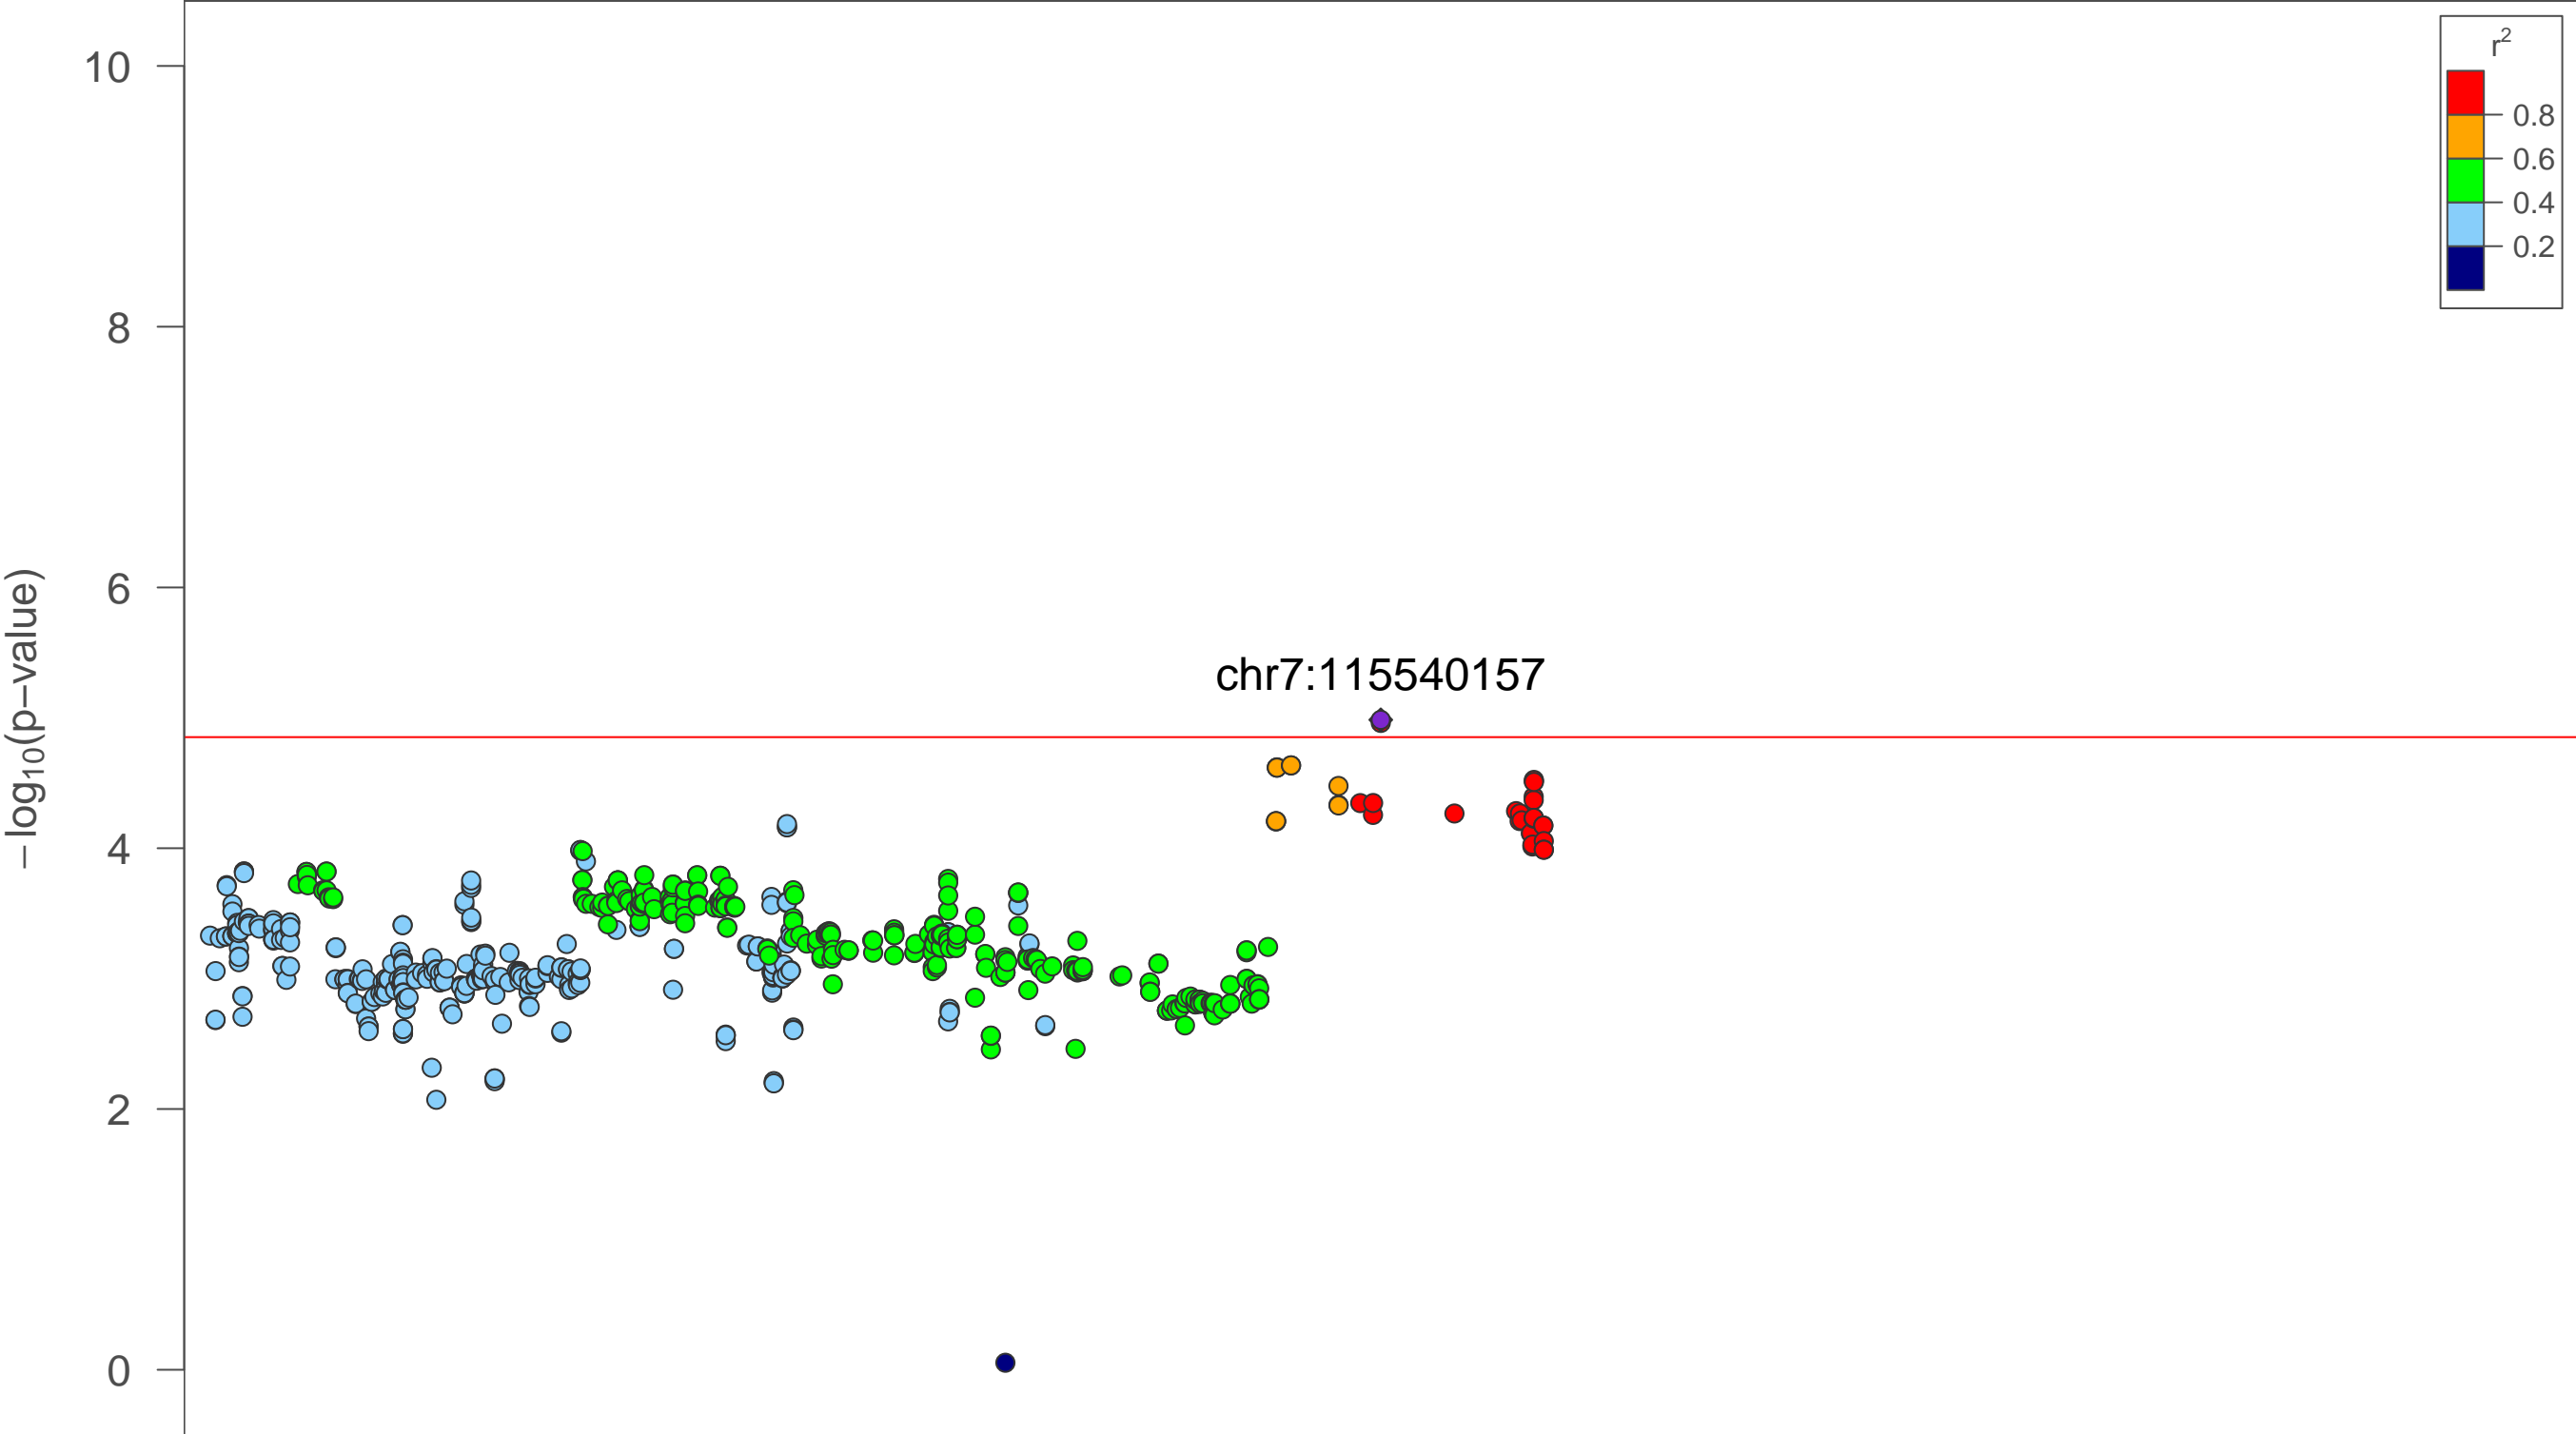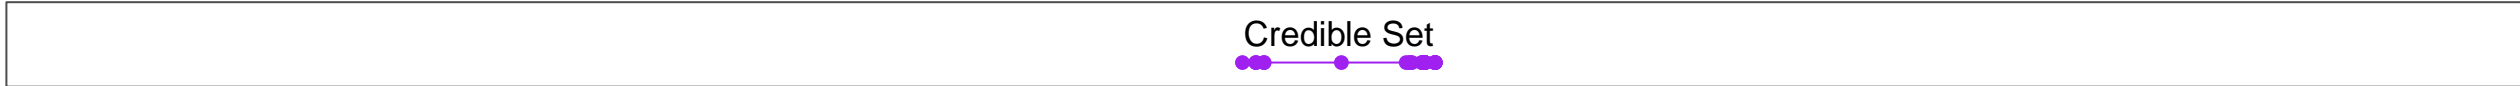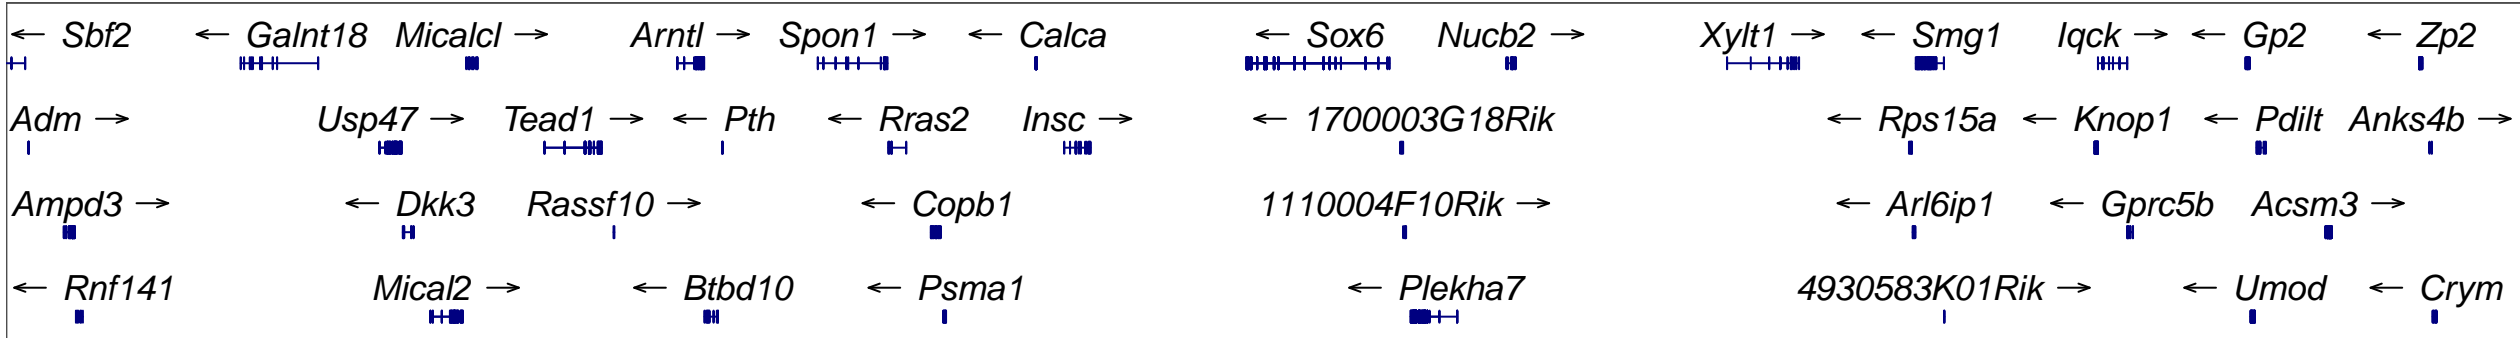

41 genes  
omitted

Position on chr7 (Mb)

date: Thu Oct 25 17:12:50 2018

build: F34GBS

display range: chr7:110540157–120540157 [110540157–120540157]

hilite range: 0 – 0 [ 0 – 0 ]

reference SNP: chr7:115540157

number of SNPs plotted: 670

min P-value: 1.04E–5 [chr7:115540157]

max P-value: 8.83E–1 [chr7:113971813]

omitted Genes: Lyve1, Mrvi1, Gm16336

omitted Genes: Ctr9, Eif4g2, 1700012D14Rik

omitted Genes: Parva, 4930543E12Rik, Far1

omitted Genes: Far1os, 4933406I18Rik, Pde3b

omitted Genes: Cyp2r1, Calcb, A730082K24Rik

omitted Genes: Rps13, Snord14a, Pik3c2a

omitted Genes: Syt17, Itpripl2, Coq7

omitted Genes: Tmc7, Tmc5, Gde1

omitted Genes: Ccp110, 9030624J02Rik, Gpr139

omitted Genes: Acsm5, Acsm2, Acsm1

omitted Genes: Acsm4, Thumpd1, Eri2

omitted Genes: 2610020H08Rik, Dcun1d3, Lymr1

omitted Genes: Tmem159, 4930505K13Rik, Abca14

omitted Genes: Abca15, Abca16



## Fine-mapping Regions

| snp            | chr | pos (Mb) | pp         | group        | color  |
|----------------|-----|----------|------------|--------------|--------|
| chr7:115454415 | 7   | 115.4544 | 0.03400282 | Credible Set | purple |
| chr7:115507677 | 7   | 115.5077 | 0.02790172 | Credible Set | purple |
| chr7:115508170 | 7   | 115.5082 | 0.03407172 | Credible Set | purple |
| chr7:115540157 | 7   | 115.5402 | 0.13779863 | Credible Set | purple |
| chr7:115540180 | 7   | 115.5402 | 0.13091693 | Credible Set | purple |
| chr7:115847912 | 7   | 115.8479 | 0.02857463 | Credible Set | purple |
| chr7:116105450 | 7   | 116.1055 | 0.02973166 | Credible Set | purple |
| chr7:116120266 | 7   | 116.1203 | 0.02517664 | Credible Set | purple |
| chr7:116121716 | 7   | 116.1217 | 0.02862464 | Credible Set | purple |
| chr7:116128732 | 7   | 116.1287 | 0.02548667 | Credible Set | purple |
| chr7:116167789 | 7   | 116.1678 | 0.02048942 | Credible Set | purple |
| chr7:116167891 | 7   | 116.1679 | 0.02057105 | Credible Set | purple |
| chr7:116173642 | 7   | 116.1736 | 0.01646756 | Credible Set | purple |
| chr7:116173781 | 7   | 116.1738 | 0.01699213 | Credible Set | purple |
| chr7:116179005 | 7   | 116.1790 | 0.03788025 | Credible Set | purple |
| chr7:116179028 | 7   | 116.1790 | 0.03574226 | Credible Set | purple |
| chr7:116179466 | 7   | 116.1795 | 0.04923355 | Credible Set | purple |
| chr7:116179541 | 7   | 116.1795 | 0.02626363 | Credible Set | purple |
| chr7:116179576 | 7   | 116.1796 | 0.02640221 | Credible Set | purple |
| chr7:116179586 | 7   | 116.1796 | 0.02650116 | Credible Set | purple |
| chr7:116179595 | 7   | 116.1796 | 0.02657195 | Credible Set | purple |
| chr7:116180032 | 7   | 116.1800 | 0.05017761 | Credible Set | purple |
| chr7:116180072 | 7   | 116.1801 | 0.04847339 | Credible Set | purple |
| chr7:116219326 | 7   | 116.2193 | 0.02336931 | Credible Set | purple |
| chr7:116219327 | 7   | 116.2193 | 0.02334005 | Credible Set | purple |
| chr7:116221282 | 7   | 116.2213 | 0.01802601 | Credible Set | purple |
| chr7:116221389 | 7   | 116.2214 | 0.01562628 | Credible Set | purple |
| chr7:116221407 | 7   | 116.2214 | 0.01558612 | Credible Set | purple |

F34 GBS, routine CBC red blood cell distribution width

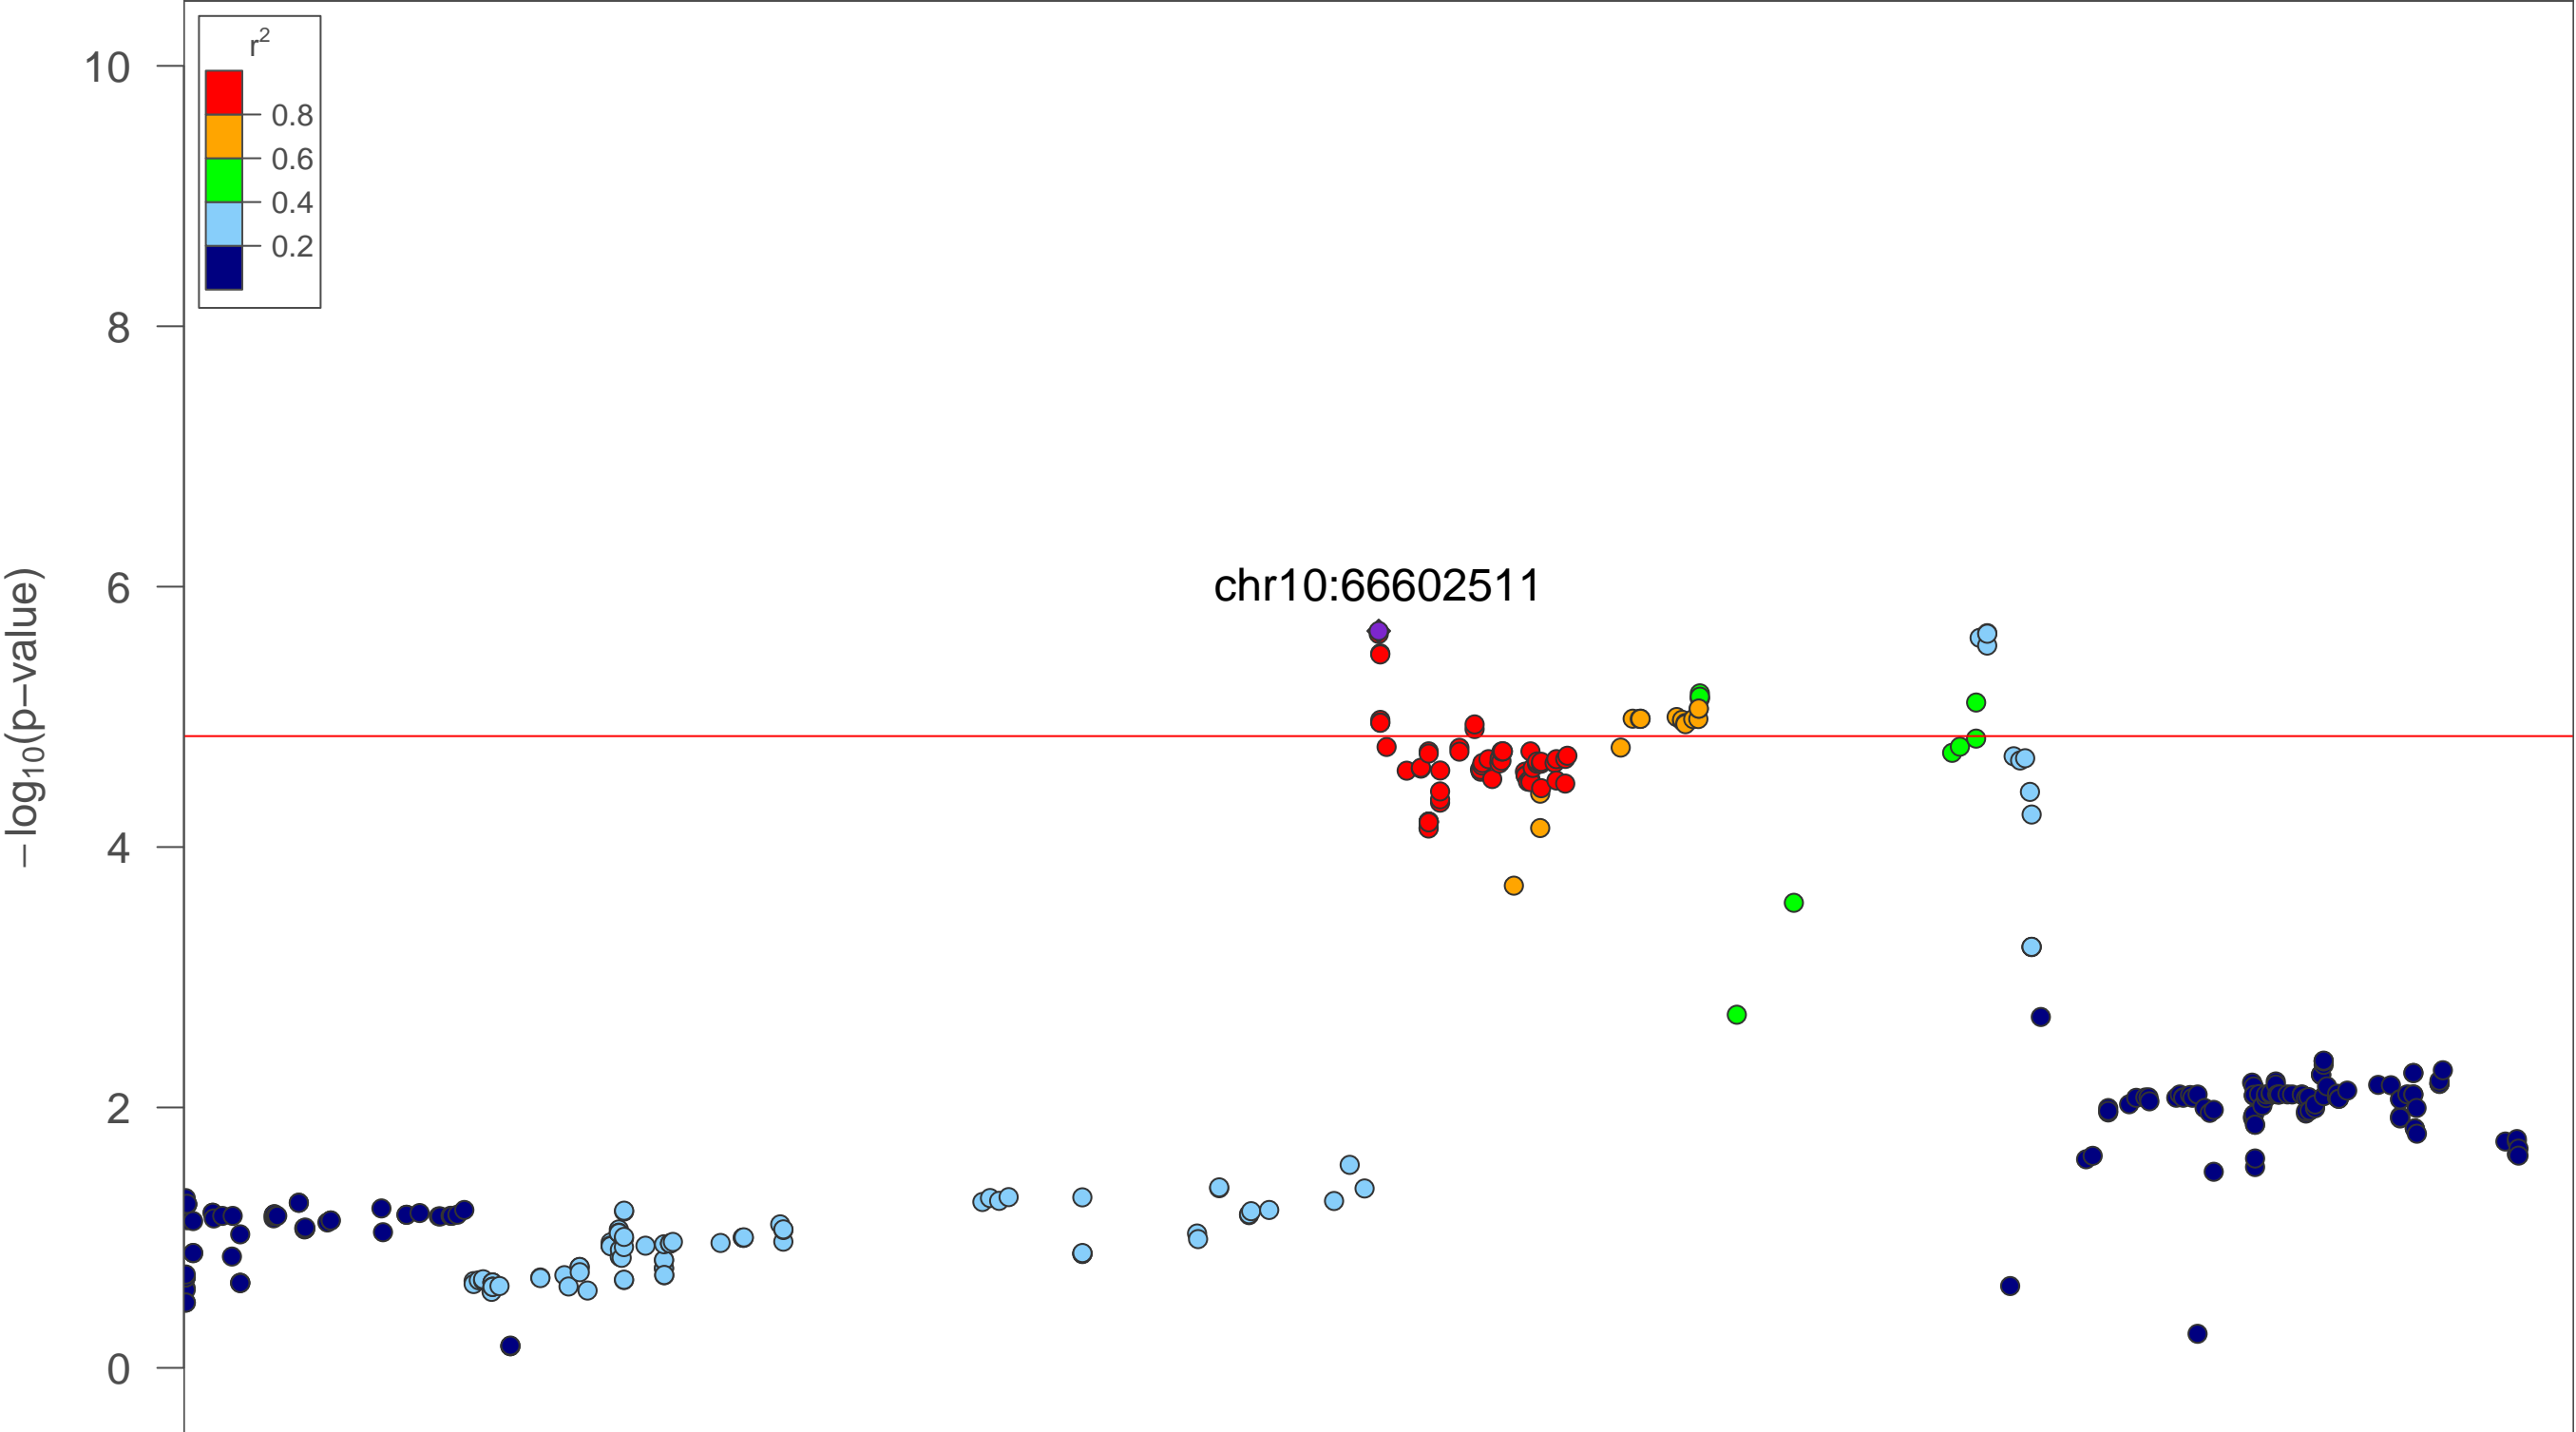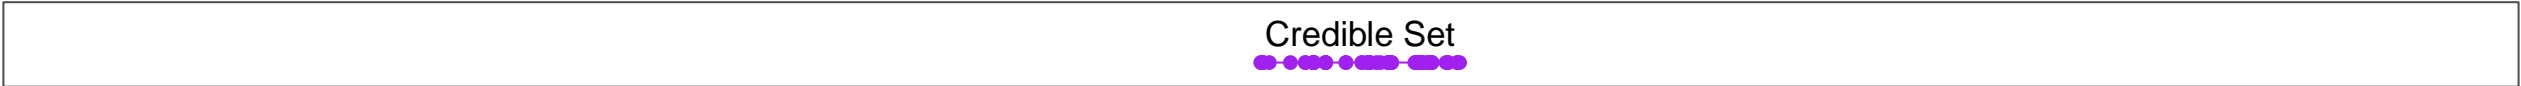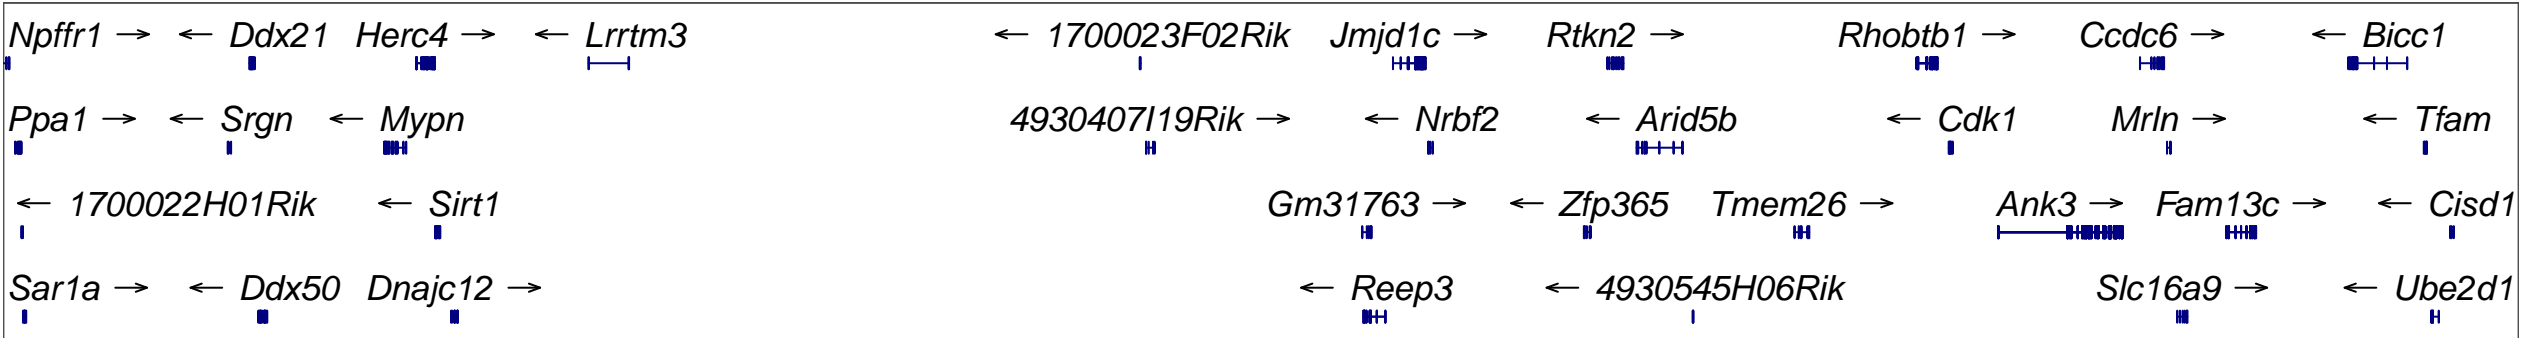

39 genes  
omitted

date: Thu Oct 25 17:12:25 2018

build: F34GBS

display range: chr10:61602511–71602511 [61602511–71602511]

hilite range: 0 – 0 [ 0 – 0 ]

reference SNP: chr10:66602511

number of SNPs plotted: 346

min P-value: 2.19E–6 [chr10:66602511]

max P-value: 6.82E–1 [chr10:62969101]

omitted Genes: Tysnd1, Aifm2, H2afy2

omitted Genes: Mir5108, Col13a1, Gm5424

omitted Genes: 2010107G23Rik, Neurog3, Tspan15

omitted Genes: Mir7662, Tacr2, Hk1

omitted Genes: Hk1os, Hkdc1, Supv3l1

omitted Genes: 4930507D05Rik, Vps26a, Kif1bp

omitted Genes: Stox1, Mir7215, Ccar1

omitted Genes: Snord98, Tet1, Slc25a16

omitted Genes: Dna2, Rufy2, Hnrnp3

omitted Genes: Pbld2, Pbld1, Atoh7

omitted Genes: Ctnna3, Egr2, Ado

omitted Genes: 1700040L02Rik, Phyhipl, D630013N20Rik

omitted Genes: C730027H18Rik, 1700113B09Rik, lpmk

## Fine-mapping Regions

| snp            | chr | pos (Mb) | pp          | group        | color  |
|----------------|-----|----------|-------------|--------------|--------|
| chr10:66602509 | 10  | 66.60251 | 0.113276210 | Credible Set | purple |
| chr10:66602511 | 10  | 66.60251 | 0.113276210 | Credible Set | purple |
| chr10:66608856 | 10  | 66.60886 | 0.076752560 | Credible Set | purple |
| chr10:66608885 | 10  | 66.60889 | 0.076752560 | Credible Set | purple |
| chr10:66609052 | 10  | 66.60905 | 0.022131543 | Credible Set | purple |
| chr10:66609080 | 10  | 66.60908 | 0.022131543 | Credible Set | purple |
| chr10:66609124 | 10  | 66.60912 | 0.022131543 | Credible Set | purple |
| chr10:66635369 | 10  | 66.63537 | 0.014610950 | Credible Set | purple |
| chr10:66719524 | 10  | 66.71952 | 0.009750032 | Credible Set | purple |
| chr10:66778997 | 10  | 66.77900 | 0.010120631 | Credible Set | purple |
| chr10:66779040 | 10  | 66.77904 | 0.010120631 | Credible Set | purple |
| chr10:66811497 | 10  | 66.81150 | 0.013836482 | Credible Set | purple |
| chr10:66811529 | 10  | 66.81153 | 0.013141887 | Credible Set | purple |
| chr10:66811581 | 10  | 66.81158 | 0.004147612 | Credible Set | purple |
| chr10:66811611 | 10  | 66.81161 | 0.004147612 | Credible Set | purple |
| chr10:66811619 | 10  | 66.81162 | 0.004147612 | Credible Set | purple |
| chr10:66811684 | 10  | 66.81168 | 0.004147612 | Credible Set | purple |
| chr10:66811694 | 10  | 66.81169 | 0.004147612 | Credible Set | purple |
| chr10:66811705 | 10  | 66.81171 | 0.004087190 | Credible Set | purple |
| chr10:66859150 | 10  | 66.85915 | 0.005671287 | Credible Set | purple |
| chr10:66859163 | 10  | 66.85916 | 0.006045913 | Credible Set | purple |
| chr10:66859201 | 10  | 66.85920 | 0.006972709 | Credible Set | purple |
| chr10:66859671 | 10  | 66.85967 | 0.009750032 | Credible Set | purple |
| chr10:66940094 | 10  | 66.94009 | 0.014610950 | Credible Set | purple |
| chr10:66940121 | 10  | 66.94012 | 0.013141887 | Credible Set | purple |
| chr10:67003583 | 10  | 67.00358 | 0.020367602 | Credible Set | purple |
| chr10:67003588 | 10  | 67.00359 | 0.022131543 | Credible Set | purple |
| chr10:67026213 | 10  | 67.02621 | 0.010120631 | Credible Set | purple |
| chr10:67029219 | 10  | 67.02922 | 0.009750032 | Credible Set | purple |
| chr10:67029237 | 10  | 67.02924 | 0.009750032 | Credible Set | purple |
| chr10:67034406 | 10  | 67.03441 | 0.010521406 | Credible Set | purple |
| chr10:67036263 | 10  | 67.03626 | 0.010956238 | Credible Set | purple |
| chr10:67061736 | 10  | 67.06174 | 0.011947227 | Credible Set | purple |
| chr10:67077389 | 10  | 67.07739 | 0.008509800 | Credible Set | purple |
| chr10:67107858 | 10  | 67.10786 | 0.011429699 | Credible Set | purple |
| chr10:67107945 | 10  | 67.10795 | 0.010956238 | Credible Set | purple |

## Fine-mapping Regions

| snp            | chr | pos (Mb) | pp          | group        | color  |
|----------------|-----|----------|-------------|--------------|--------|
| chr10:67108562 | 10  | 67.10856 | 0.011947227 | Credible Set | purple |
| chr10:67115847 | 10  | 67.11585 | 0.011429699 | Credible Set | purple |
| chr10:67116164 | 10  | 67.11616 | 0.013836482 | Credible Set | purple |
| chr10:67121830 | 10  | 67.12183 | 0.013836482 | Credible Set | purple |
| chr10:67121898 | 10  | 67.12190 | 0.013836482 | Credible Set | purple |
| chr10:67214197 | 10  | 67.21420 | 0.009750032 | Credible Set | purple |
| chr10:67217456 | 10  | 67.21746 | 0.009086602 | Credible Set | purple |
| chr10:67217505 | 10  | 67.21751 | 0.009086602 | Credible Set | purple |
| chr10:67226747 | 10  | 67.22675 | 0.008248714 | Credible Set | purple |
| chr10:67237234 | 10  | 67.23723 | 0.008509800 | Credible Set | purple |
| chr10:67237236 | 10  | 67.23724 | 0.008003592 | Credible Set | purple |
| chr10:67237389 | 10  | 67.23739 | 0.013836482 | Credible Set | purple |
| chr10:67246731 | 10  | 67.24673 | 0.010120631 | Credible Set | purple |
| chr10:67264982 | 10  | 67.26498 | 0.010956238 | Credible Set | purple |
| chr10:67265380 | 10  | 67.26538 | 0.011429699 | Credible Set | purple |
| chr10:67281545 | 10  | 67.28154 | 0.010956238 | Credible Set | purple |
| chr10:67281940 | 10  | 67.28194 | 0.011429699 | Credible Set | purple |
| chr10:67282089 | 10  | 67.28209 | 0.007350506 | Credible Set | purple |
| chr10:67338317 | 10  | 67.33832 | 0.010956238 | Credible Set | purple |
| chr10:67345731 | 10  | 67.34573 | 0.011947227 | Credible Set | purple |
| chr10:67346184 | 10  | 67.34618 | 0.008248714 | Credible Set | purple |
| chr10:67382855 | 10  | 67.38286 | 0.007773003 | Credible Set | purple |
| chr10:67383022 | 10  | 67.38302 | 0.011947227 | Credible Set | purple |
| chr10:67391783 | 10  | 67.39178 | 0.012515334 | Credible Set | purple |

# F34 GBS, routine CBC hemoglobin distribution width

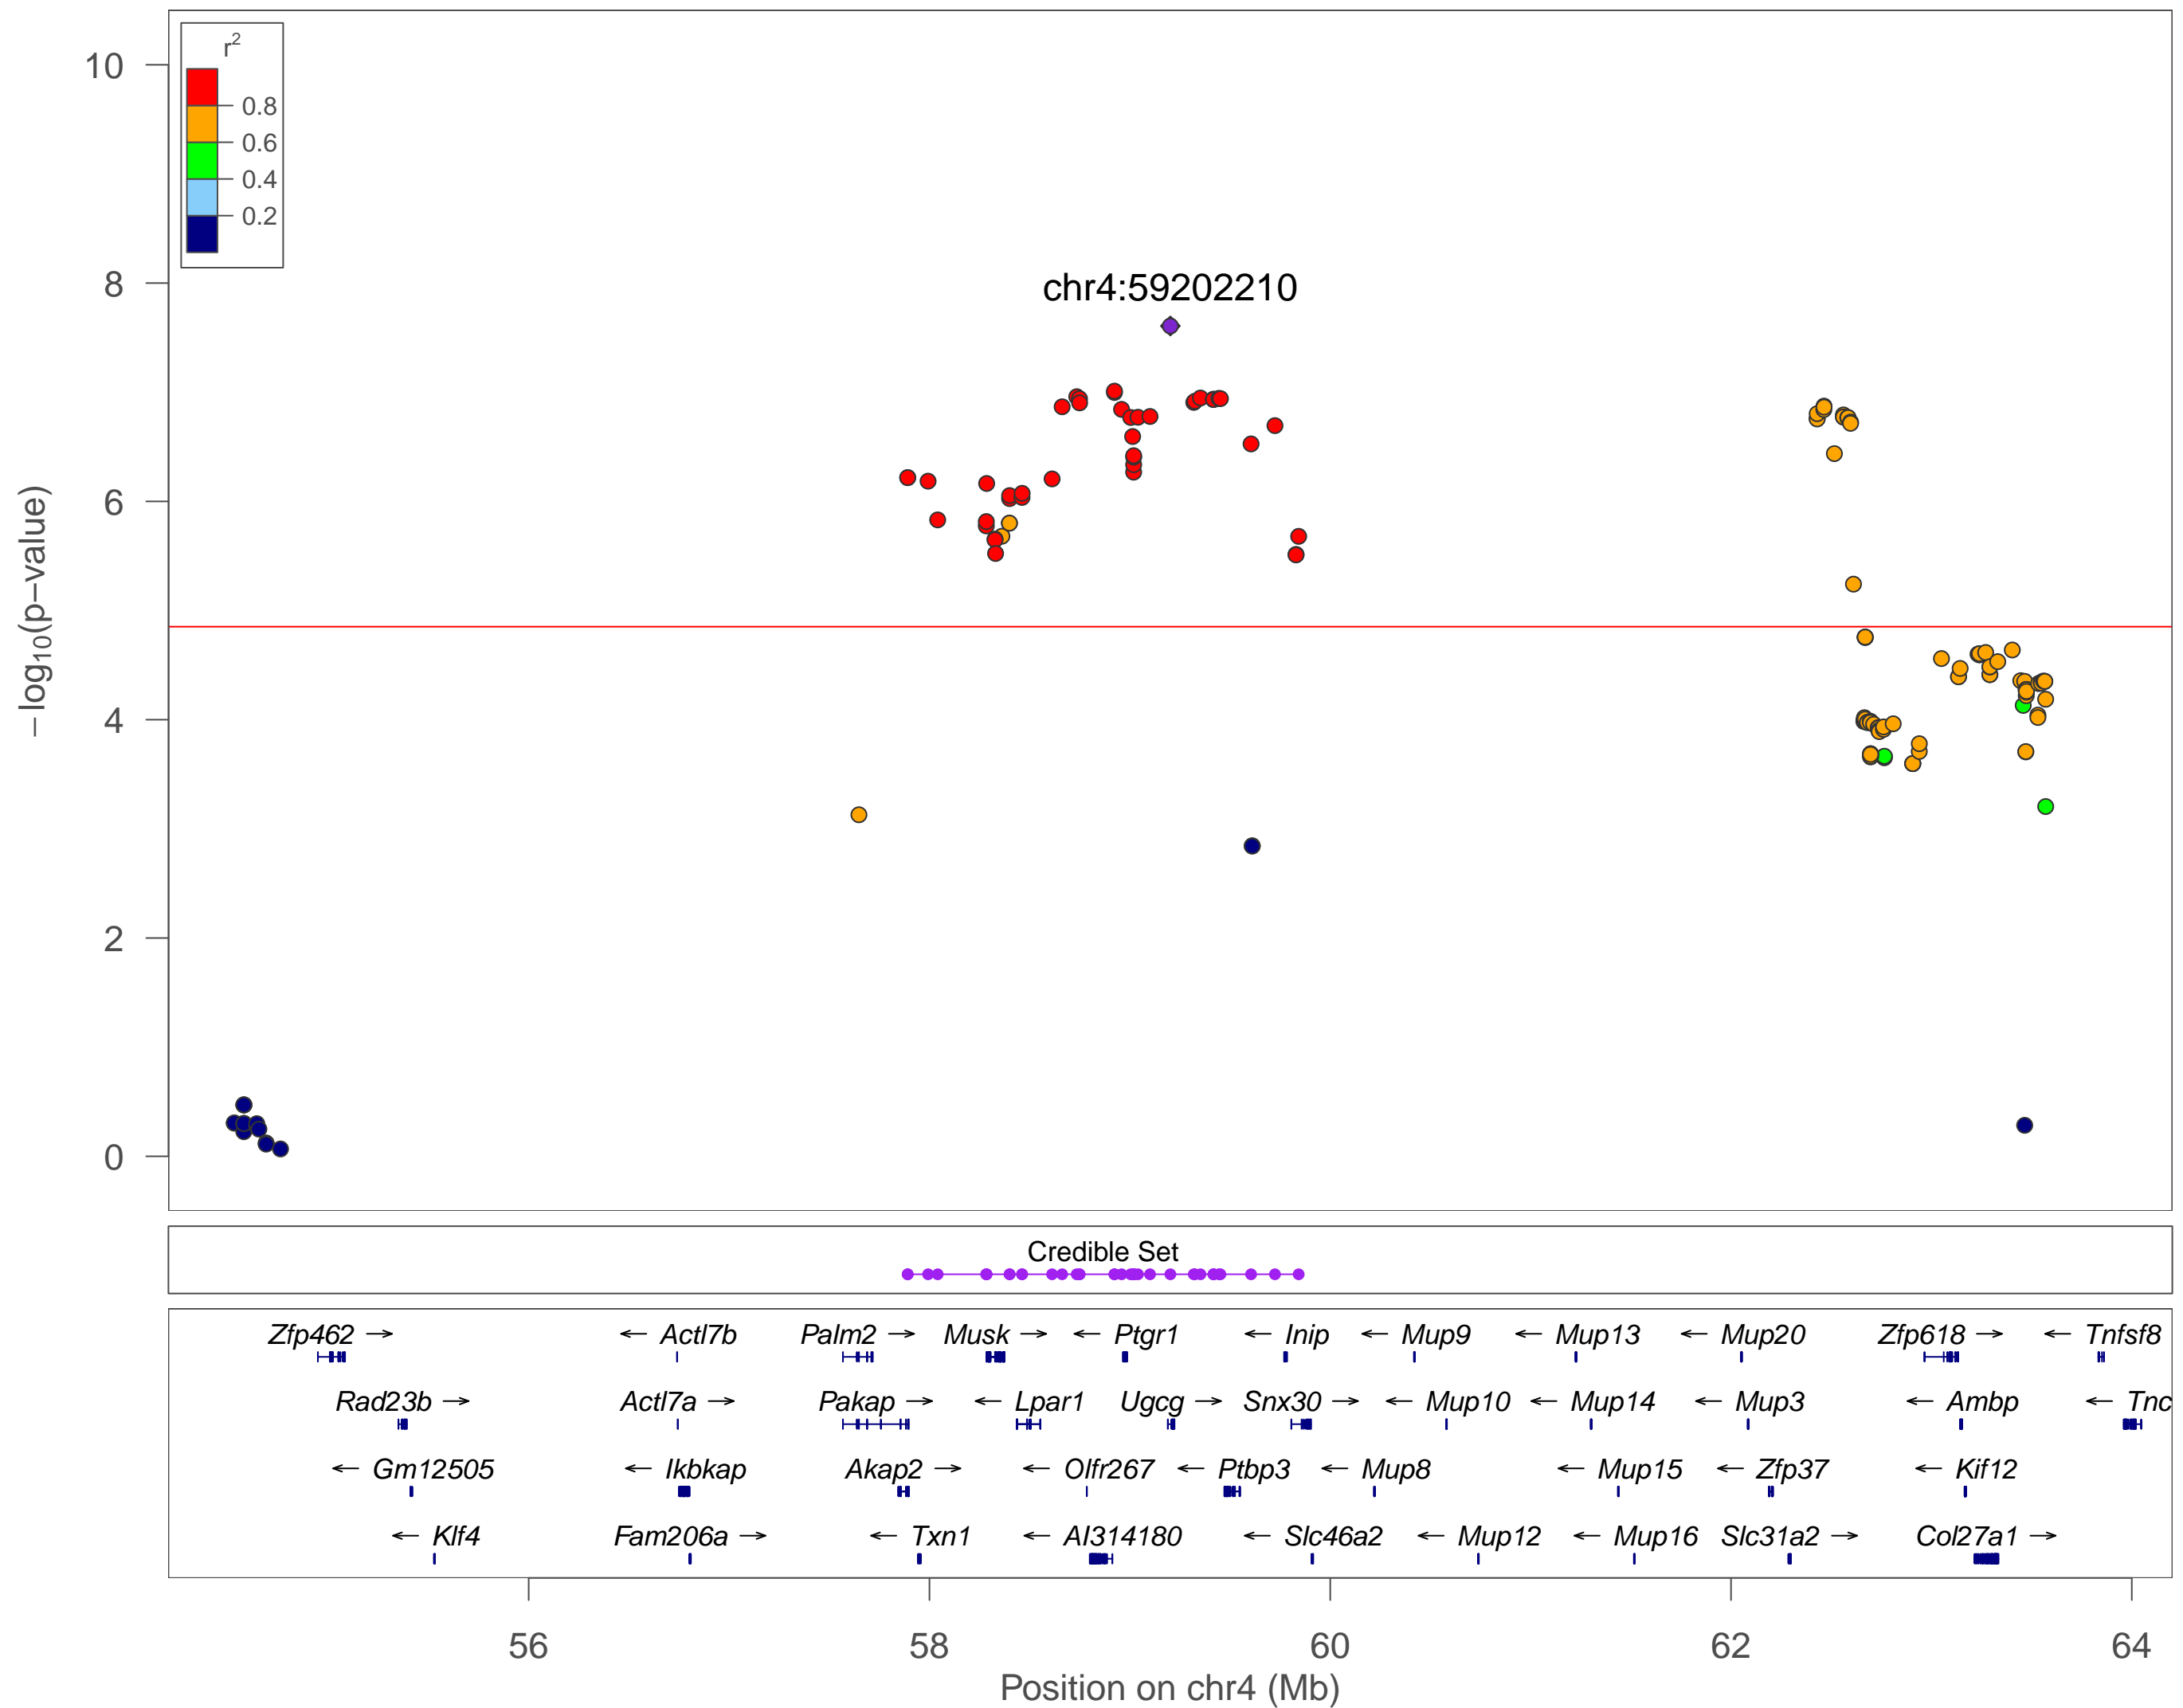

date: Thu Oct 25 17:01:02 2018  
build: F34GBS  
display range: chr4:54202210–64202210 [54202210–64202210]  
hilite range: 0 – 0 [ 0 – 0 ]  
reference SNP: chr4:59202210  
number of SNPs plotted: 157  
min P-value: 2.47E–8 [chr4:59202210]  
max P-value: 8.56E–1 [chr4:54761468]  
omitted Genes: Ctnna1, Tmem245, Mir32  
omitted Genes: Frrs1l, Epb41l4b, Gm12530  
omitted Genes: Ptpn3, 1700042G15Rik, D630039A03Rik  
omitted Genes: Txndc8, Sveg1, Mir3095  
omitted Genes: Zkscan16, Dnajc25, Gng10  
omitted Genes: Gm12596, Susd1, Hsd12  
omitted Genes: E130308A19Rik, Mup4, Mup6  
omitted Genes: Mup7, Mup2, Mup1  
omitted Genes: Mup11, Mup17, Mup18  
omitted Genes: Mup19, Mup5, Mup21  
omitted Genes: Fkbp15, Slc31a1, Cdc26  
omitted Genes: Prpf4, Rnf183, Wdr31  
omitted Genes: Bspry, Hdhd3, Alad  
omitted Genes: Pole3, 4933430I17Rik, Rgs3  
omitted Genes: Mir455, Orm1, Orm3  
omitted Genes: Orm2, Akna, Whrn  
omitted Genes: Atp6v1g1, 6330416G13Rik, Gm11213  
omitted Genes: 1700018C11Rik, Tnfsf15

## Fine-mapping Regions

| snp           | chr | pos (Mb) | pp          | group        | color  |
|---------------|-----|----------|-------------|--------------|--------|
| chr4:57891427 | 4   | 57.89143 | 0.007748913 | Credible Set | purple |
| chr4:57891451 | 4   | 57.89145 | 0.007748913 | Credible Set | purple |
| chr4:57993173 | 4   | 57.99317 | 0.007207393 | Credible Set | purple |
| chr4:58041091 | 4   | 58.04109 | 0.003285135 | Credible Set | purple |
| chr4:58283671 | 4   | 58.28367 | 0.002906190 | Credible Set | purple |
| chr4:58283721 | 4   | 58.28372 | 0.003173812 | Credible Set | purple |
| chr4:58285477 | 4   | 58.28548 | 0.006881396 | Credible Set | purple |
| chr4:58399947 | 4   | 58.39995 | 0.005058829 | Credible Set | purple |
| chr4:58400011 | 4   | 58.40001 | 0.005378042 | Credible Set | purple |
| chr4:58461854 | 4   | 58.46185 | 0.005181592 | Credible Set | purple |
| chr4:58462401 | 4   | 58.46240 | 0.005633158 | Credible Set | purple |
| chr4:58611965 | 4   | 58.61196 | 0.007548703 | Credible Set | purple |
| chr4:58662154 | 4   | 58.66215 | 0.032809373 | Credible Set | purple |
| chr4:58735042 | 4   | 58.73504 | 0.040294408 | Credible Set | purple |
| chr4:58748774 | 4   | 58.74877 | 0.038686690 | Credible Set | purple |
| chr4:58749245 | 4   | 58.74925 | 0.035507815 | Credible Set | purple |
| chr4:58923167 | 4   | 58.92317 | 0.043927718 | Credible Set | purple |
| chr4:58923190 | 4   | 58.92319 | 0.045160814 | Credible Set | purple |
| chr4:58958681 | 4   | 58.95868 | 0.031124327 | Credible Set | purple |
| chr4:59004314 | 4   | 59.00431 | 0.026373074 | Credible Set | purple |
| chr4:59013917 | 4   | 59.01392 | 0.017881488 | Credible Set | purple |
| chr4:59019003 | 4   | 59.01900 | 0.008656517 | Credible Set | purple |
| chr4:59019032 | 4   | 59.01903 | 0.010075153 | Credible Set | purple |
| chr4:59019072 | 4   | 59.01907 | 0.011759463 | Credible Set | purple |
| chr4:59019113 | 4   | 59.01911 | 0.012105110 | Credible Set | purple |
| chr4:59040591 | 4   | 59.04059 | 0.026499791 | Credible Set | purple |
| chr4:59100640 | 4   | 59.10064 | 0.026917255 | Credible Set | purple |
| chr4:59202210 | 4   | 59.20221 | 0.171013248 | Credible Set | purple |
| chr4:59319020 | 4   | 59.31902 | 0.035880347 | Credible Set | purple |
| chr4:59324851 | 4   | 59.32485 | 0.036725464 | Credible Set | purple |
| chr4:59352342 | 4   | 59.35234 | 0.039231485 | Credible Set | purple |
| chr4:59417447 | 4   | 59.41745 | 0.038287627 | Credible Set | purple |
| chr4:59417451 | 4   | 59.41745 | 0.038167661 | Credible Set | purple |
| chr4:59417505 | 4   | 59.41750 | 0.038047320 | Credible Set | purple |
| chr4:59444538 | 4   | 59.44454 | 0.038964344 | Credible Set | purple |
| chr4:59451945 | 4   | 59.45195 | 0.038747805 | Credible Set | purple |



Fine-mapping Regions

| snp           | chr | pos (Mb) | pp          | group        | color  |
|---------------|-----|----------|-------------|--------------|--------|
| chr4:59604913 | 4   | 59.60491 | 0.015387839 | Credible Set | purple |
| chr4:59724135 | 4   | 59.72413 | 0.022336546 | Credible Set | purple |
| chr4:59842519 | 4   | 59.84252 | 0.002352616 | Credible Set | purple |

# F34 GBS, routine CBC hemoglobin distribution width

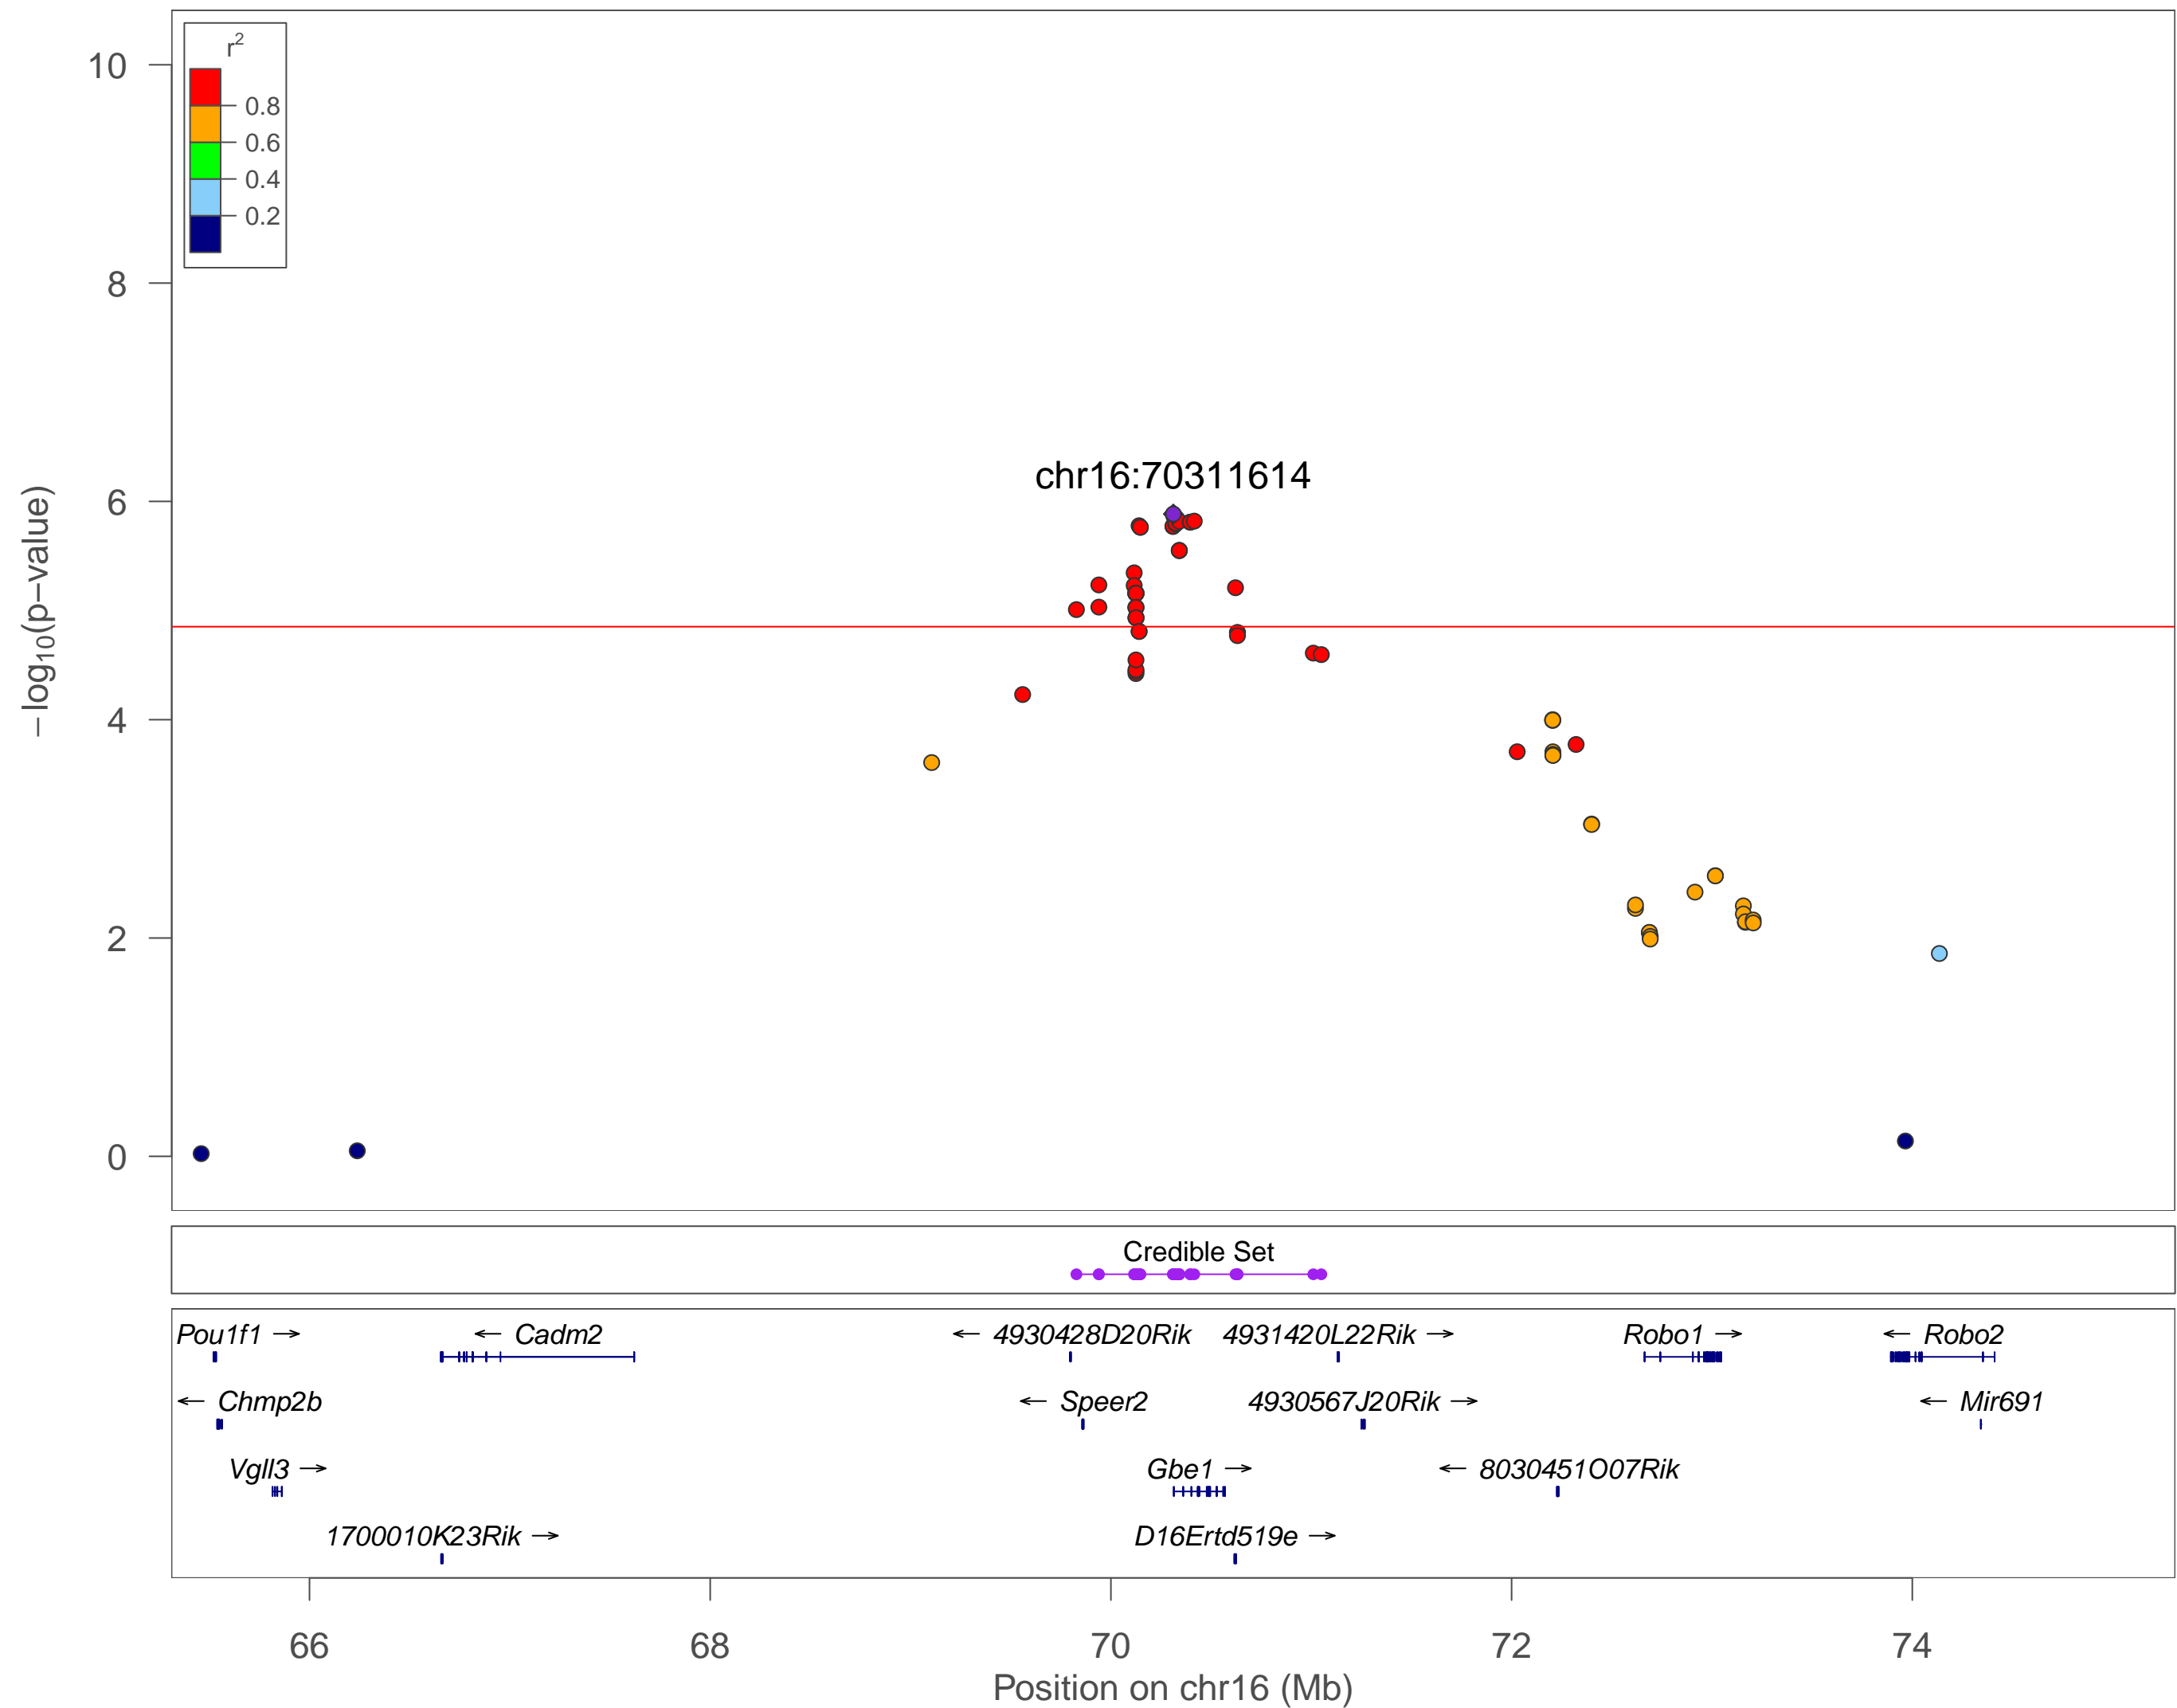

date: Thu Oct 25 17:00:53 2018

build: F34GBS

display range: chr16:65311614–75311614 [65311614–75311614]

hilite range: 0 – 0 [ 0 – 0 ]

reference SNP: chr16:70311614

number of SNPs plotted: 80

min P-value: 1.3E–6 [chr16:70311614]

max P-value: 9.45E–1 [chr16:65459428]

## Fine-mapping Regions

| snp            | chr | pos (Mb) | pp          | group        | color  |
|----------------|-----|----------|-------------|--------------|--------|
| chr16:69827834 | 16  | 69.82783 | 0.008250572 | Credible Set | purple |
| chr16:69939841 | 16  | 69.93984 | 0.013575024 | Credible Set | purple |
| chr16:69939906 | 16  | 69.93991 | 0.008675613 | Credible Set | purple |
| chr16:70116129 | 16  | 70.11613 | 0.017336091 | Credible Set | purple |
| chr16:70116236 | 16  | 70.11624 | 0.013409284 | Credible Set | purple |
| chr16:70124826 | 16  | 70.12483 | 0.011452122 | Credible Set | purple |
| chr16:70124828 | 16  | 70.12483 | 0.011452122 | Credible Set | purple |
| chr16:70124838 | 16  | 70.12484 | 0.011452122 | Credible Set | purple |
| chr16:70124859 | 16  | 70.12486 | 0.011452122 | Credible Set | purple |
| chr16:70124867 | 16  | 70.12487 | 0.011452122 | Credible Set | purple |
| chr16:70124868 | 16  | 70.12487 | 0.011452122 | Credible Set | purple |
| chr16:70124887 | 16  | 70.12489 | 0.011452122 | Credible Set | purple |
| chr16:70124959 | 16  | 70.12496 | 0.008623924 | Credible Set | purple |
| chr16:70124962 | 16  | 70.12496 | 0.008623924 | Credible Set | purple |
| chr16:70124987 | 16  | 70.12499 | 0.008623924 | Credible Set | purple |
| chr16:70125117 | 16  | 70.12512 | 0.003001133 | Credible Set | purple |
| chr16:70125367 | 16  | 70.12537 | 0.006971344 | Credible Set | purple |
| chr16:70125371 | 16  | 70.12537 | 0.006996982 | Credible Set | purple |
| chr16:70125418 | 16  | 70.12542 | 0.007010792 | Credible Set | purple |
| chr16:70140593 | 16  | 70.14059 | 0.044975696 | Credible Set | purple |
| chr16:70140761 | 16  | 70.14076 | 0.005327267 | Credible Set | purple |
| chr16:70140804 | 16  | 70.14080 | 0.005308280 | Credible Set | purple |
| chr16:70146841 | 16  | 70.14684 | 0.043580539 | Credible Set | purple |
| chr16:70146890 | 16  | 70.14689 | 0.043580539 | Credible Set | purple |
| chr16:70309612 | 16  | 70.30961 | 0.044244068 | Credible Set | purple |
| chr16:70309921 | 16  | 70.30992 | 0.044612838 | Credible Set | purple |
| chr16:70311614 | 16  | 70.31161 | 0.057019078 | Credible Set | purple |
| chr16:70314976 | 16  | 70.31498 | 0.054154550 | Credible Set | purple |
| chr16:70323729 | 16  | 70.32373 | 0.050477142 | Credible Set | purple |
| chr16:70324316 | 16  | 70.32432 | 0.046671903 | Credible Set | purple |
| chr16:70324391 | 16  | 70.32439 | 0.047358827 | Credible Set | purple |
| chr16:70341194 | 16  | 70.34119 | 0.049141270 | Credible Set | purple |
| chr16:70341347 | 16  | 70.34135 | 0.027153292 | Credible Set | purple |
| chr16:70341354 | 16  | 70.34135 | 0.027284663 | Credible Set | purple |
| chr16:70341358 | 16  | 70.34136 | 0.027246633 | Credible Set | purple |
| chr16:70395502 | 16  | 70.39550 | 0.048288713 | Credible Set | purple |

Fine-mapping Regions

| snp            | chr | pos (Mb) | pp          | group        | color  |
|----------------|-----|----------|-------------|--------------|--------|
| chr16:70396913 | 16  | 70.39691 | 0.048411322 | Credible Set | purple |
| chr16:70416028 | 16  | 70.41603 | 0.049357532 | Credible Set | purple |
| chr16:70621955 | 16  | 70.62195 | 0.012817652 | Credible Set | purple |
| chr16:70631684 | 16  | 70.63168 | 0.005194439 | Credible Set | purple |
| chr16:70631718 | 16  | 70.63172 | 0.005201000 | Credible Set | purple |
| chr16:70631722 | 16  | 70.63172 | 0.004885828 | Credible Set | purple |
| chr16:71010303 | 16  | 71.01030 | 0.003440319 | Credible Set | purple |
| chr16:71050225 | 16  | 71.05022 | 0.003338409 | Credible Set | purple |

F34 GBS, routine CBC mean platelet volume

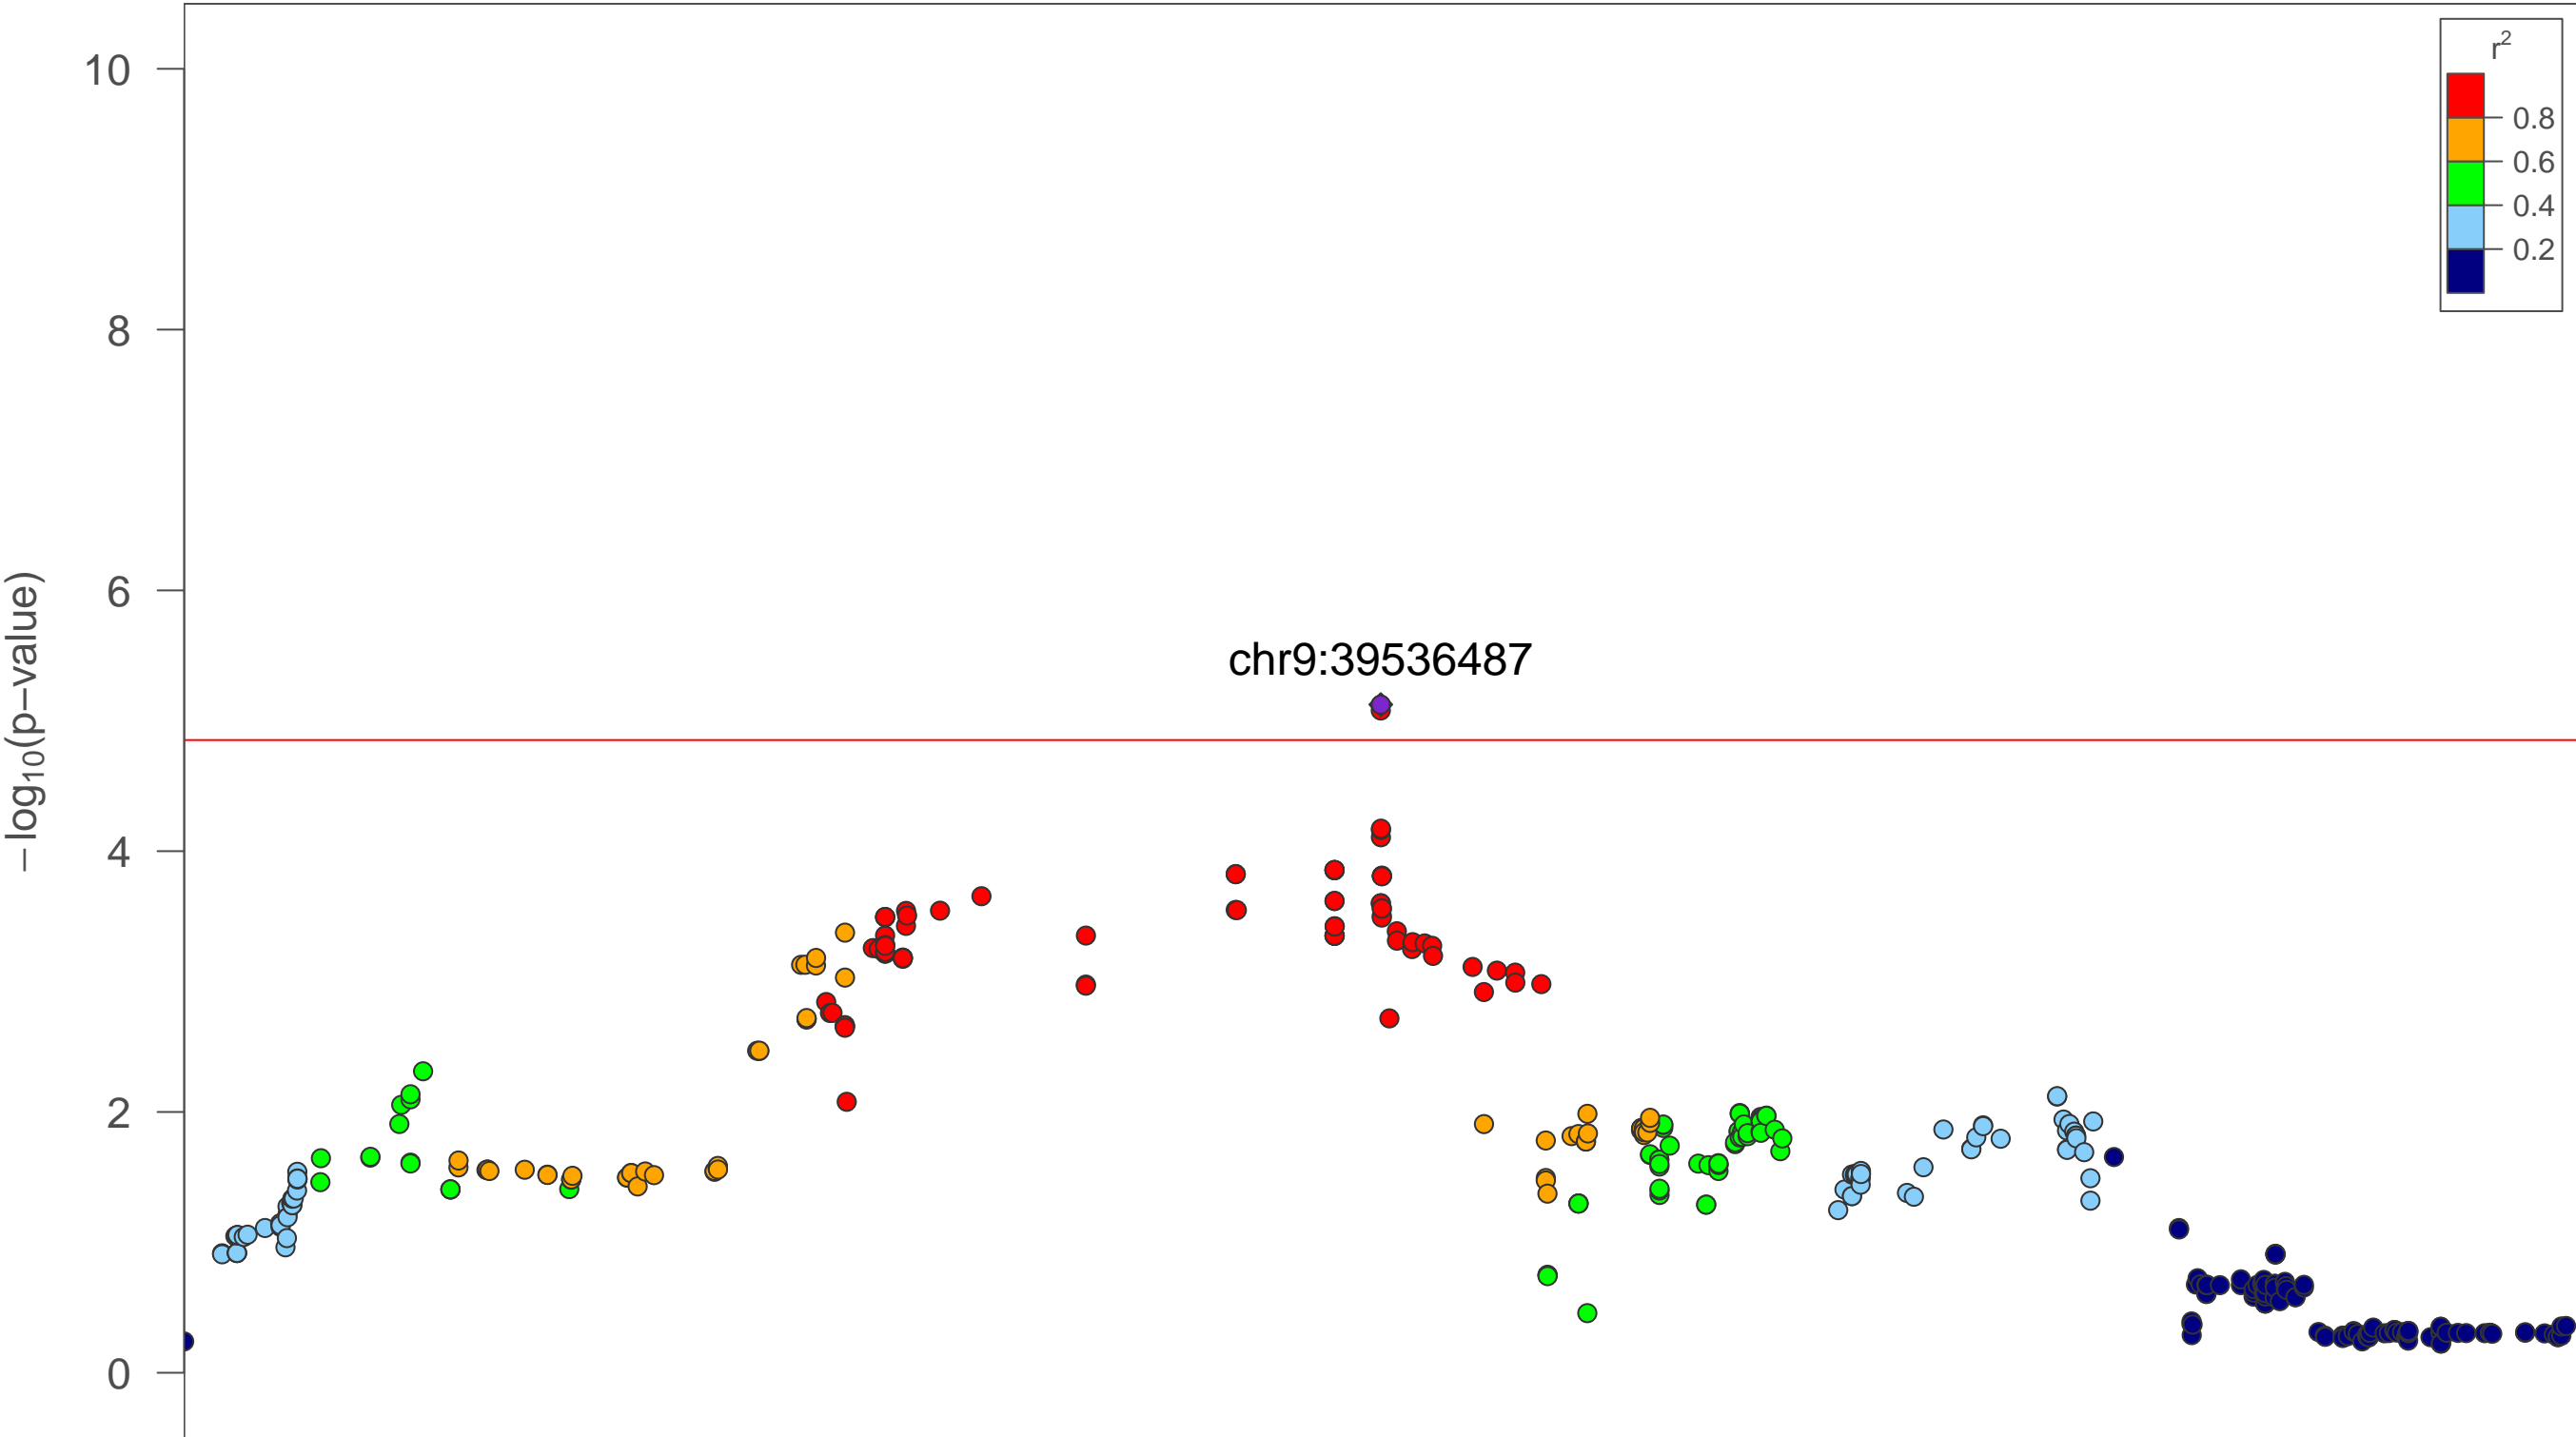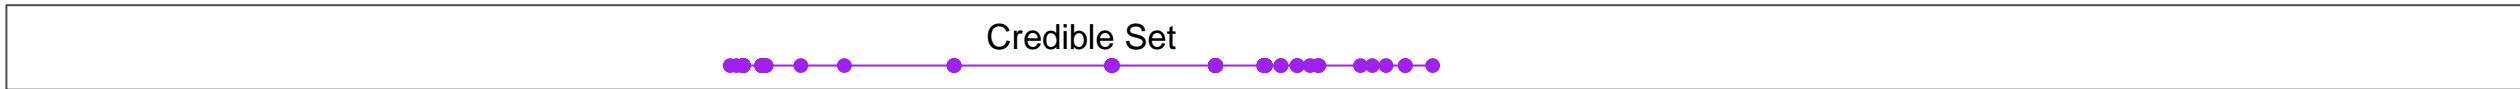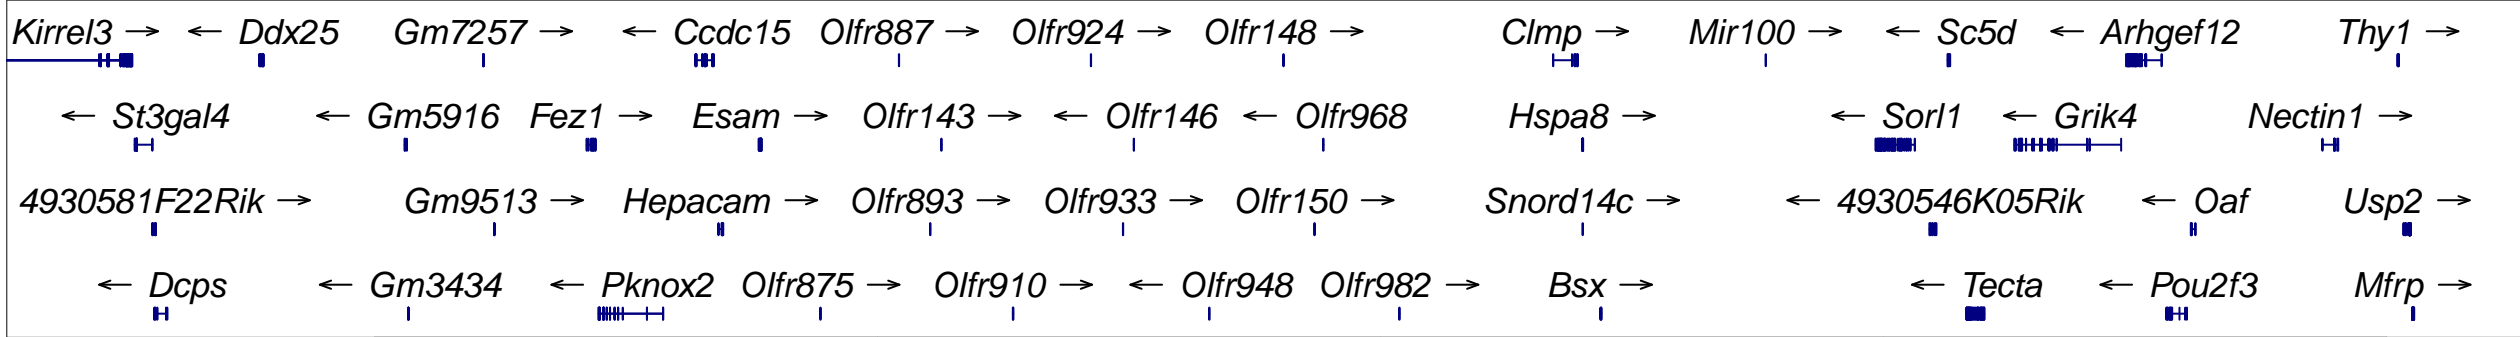

168 genes  
omitted

date: Thu Oct 25 17:01:26 2018

build: F34GBS

display range: chr9:34536487–44536487 [34536487–44536487]

hilite range: 0 – 0 [ 0 – 0 ]

reference SNP: chr9:39536487

number of SNPs plotted: 396

min P-value: 7.51E–6 [chr9:39536487]

max P-value: 5.98E–1 [chr9:43965763]

omitted Genes: Tirap, Foxred1, Srpr

omitted Genes: Fam118b, Rpusd4, 4933422A05Rik

omitted Genes: Cdon, Pus3, Hyls1

omitted Genes: Pate4, Pate3, Pate2

omitted Genes: Pate1, Gm17677, Gm17727

omitted Genes: D730048I06Rik, 9230110F15Rik, Gm3428

omitted Genes: Gm5615, Gm17689, A630095E13Rik

omitted Genes: 1700027I24Rik, Acrv1, Chek1

omitted Genes: Stt3a, Ei24, Tmem218

omitted Genes: Slc37a2, Robo4, Robo3

omitted Genes: Msantd2, Vsig2, Nrgn

omitted Genes: Spa17, Siae, Tbrg1

omitted Genes: Panx3, Olfr160, Olfr151

omitted Genes: Olfr874, Olfr876, Olfr877

omitted Genes: Olfr145, Olfr878, Olfr881

omitted Genes: Olfr883, Olfr884, Olfr885

omitted Genes: Olfr888, Olfr889, Olfr890

omitted Genes: Olfr891, Olfr894, Olfr895

omitted Genes: Olfr25, Olfr898, Olfr250

omitted Genes: Olfr251, Olfr147, Olfr901

omitted Genes: Olfr902, Olfr904, Olfr905

omitted Genes: Olfr906, Olfr907, Olfr908

omitted Genes: Olfr911-ps1, Olfr912, Olfr913

omitted Genes: Olfr914, Olfr915, Olfr916

omitted Genes: Olfr917, Olfr918, Olfr919

omitted Genes: Vwa5a, Olfr920, Olfr921

omitted Genes: Olfr922, Olfr923, Olfr26

omitted Genes: Olfr926, Olfr930, Olfr934

omitted Genes: Olfr935, Olfr936, Olfr937

omitted Genes: Olfr938, Olfr27, Olfr943

omitted Genes: Olfr944, Olfr1537, Olfr945

omitted Genes: Olfr947, ps1, Olfr951, Olfr952

Make more plots at <http://csg.sph.umich.edu/locuszoom/>

## Fine-mapping Regions

| snp           | chr | pos (Mb) | pp          | group        | color  |
|---------------|-----|----------|-------------|--------------|--------|
| chr9:37414290 | 9   | 37.41429 | 0.003422972 | Credible Set | purple |
| chr9:37438921 | 9   | 37.43892 | 0.003366014 | Credible Set | purple |
| chr9:37465579 | 9   | 37.46558 | 0.004211718 | Credible Set | purple |
| chr9:37465802 | 9   | 37.46580 | 0.005689811 | Credible Set | purple |
| chr9:37465804 | 9   | 37.46580 | 0.005712100 | Credible Set | purple |
| chr9:37465813 | 9   | 37.46581 | 0.005720340 | Credible Set | purple |
| chr9:37465903 | 9   | 37.46590 | 0.003143168 | Credible Set | purple |
| chr9:37465905 | 9   | 37.46590 | 0.003119966 | Credible Set | purple |
| chr9:37465916 | 9   | 37.46592 | 0.003139806 | Credible Set | purple |
| chr9:37465963 | 9   | 37.46596 | 0.003217177 | Credible Set | purple |
| chr9:37466086 | 9   | 37.46609 | 0.003598142 | Credible Set | purple |
| chr9:37466137 | 9   | 37.46614 | 0.003550052 | Credible Set | purple |
| chr9:37539552 | 9   | 37.53955 | 0.002926010 | Credible Set | purple |
| chr9:37539568 | 9   | 37.53957 | 0.002869104 | Credible Set | purple |
| chr9:37539584 | 9   | 37.53958 | 0.002923584 | Credible Set | purple |
| chr9:37539604 | 9   | 37.53960 | 0.002902147 | Credible Set | purple |
| chr9:37552798 | 9   | 37.55280 | 0.004936077 | Credible Set | purple |
| chr9:37553112 | 9   | 37.55311 | 0.006324244 | Credible Set | purple |
| chr9:37557424 | 9   | 37.55742 | 0.005854382 | Credible Set | purple |
| chr9:37695097 | 9   | 37.69510 | 0.006348683 | Credible Set | purple |
| chr9:37868086 | 9   | 37.86809 | 0.008063101 | Credible Set | purple |
| chr9:38304315 | 9   | 38.30432 | 0.001881520 | Credible Set | purple |
| chr9:38304328 | 9   | 38.30433 | 0.001847651 | Credible Set | purple |
| chr9:38304643 | 9   | 38.30464 | 0.004207367 | Credible Set | purple |
| chr9:38930488 | 9   | 38.93049 | 0.011644150 | Credible Set | purple |
| chr9:38930537 | 9   | 38.93054 | 0.011611415 | Credible Set | purple |
| chr9:38930589 | 9   | 38.93059 | 0.006431069 | Credible Set | purple |
| chr9:38935078 | 9   | 38.93508 | 0.006400153 | Credible Set | purple |
| chr9:39343278 | 9   | 39.34328 | 0.012427759 | Credible Set | purple |
| chr9:39343281 | 9   | 39.34328 | 0.012427759 | Credible Set | purple |
| chr9:39343318 | 9   | 39.34332 | 0.012427759 | Credible Set | purple |
| chr9:39343350 | 9   | 39.34335 | 0.012486147 | Credible Set | purple |
| chr9:39343392 | 9   | 39.34339 | 0.007439149 | Credible Set | purple |
| chr9:39343432 | 9   | 39.34343 | 0.007463132 | Credible Set | purple |
| chr9:39343515 | 9   | 39.34351 | 0.004209055 | Credible Set | purple |
| chr9:39343529 | 9   | 39.34353 | 0.004194884 | Credible Set | purple |



## Fine-mapping Regions

| snp           | chr | pos (Mb) | pp          | group        | color  |
|---------------|-----|----------|-------------|--------------|--------|
| chr9:39343543 | 9   | 39.34354 | 0.004194884 | Credible Set | purple |
| chr9:39343573 | 9   | 39.34357 | 0.004194884 | Credible Set | purple |
| chr9:39343574 | 9   | 39.34357 | 0.004194884 | Credible Set | purple |
| chr9:39343835 | 9   | 39.34383 | 0.004907975 | Credible Set | purple |
| chr9:39343836 | 9   | 39.34384 | 0.004888817 | Credible Set | purple |
| chr9:39536486 | 9   | 39.53649 | 0.198249432 | Credible Set | purple |
| chr9:39536487 | 9   | 39.53649 | 0.199624197 | Credible Set | purple |
| chr9:39536502 | 9   | 39.53650 | 0.180698952 | Credible Set | purple |
| chr9:39536802 | 9   | 39.53680 | 0.007177750 | Credible Set | purple |
| chr9:39536806 | 9   | 39.53681 | 0.007167807 | Credible Set | purple |
| chr9:39537143 | 9   | 39.53714 | 0.021501081 | Credible Set | purple |
| chr9:39537177 | 9   | 39.53718 | 0.024301392 | Credible Set | purple |
| chr9:39537178 | 9   | 39.53718 | 0.024833881 | Credible Set | purple |
| chr9:39540755 | 9   | 39.54075 | 0.005834370 | Credible Set | purple |
| chr9:39540852 | 9   | 39.54085 | 0.005659179 | Credible Set | purple |
| chr9:39540971 | 9   | 39.54097 | 0.006569202 | Credible Set | purple |
| chr9:39540972 | 9   | 39.54097 | 0.006574866 | Credible Set | purple |
| chr9:39541231 | 9   | 39.54123 | 0.011349162 | Credible Set | purple |
| chr9:39541239 | 9   | 39.54124 | 0.011284875 | Credible Set | purple |
| chr9:39541258 | 9   | 39.54126 | 0.011218388 | Credible Set | purple |
| chr9:39603580 | 9   | 39.60358 | 0.004517231 | Credible Set | purple |
| chr9:39604144 | 9   | 39.60414 | 0.003867247 | Credible Set | purple |
| chr9:39667289 | 9   | 39.66729 | 0.003367749 | Credible Set | purple |
| chr9:39669535 | 9   | 39.66954 | 0.003774157 | Credible Set | purple |
| chr9:39719870 | 9   | 39.71987 | 0.003698203 | Credible Set | purple |
| chr9:39751082 | 9   | 39.75108 | 0.003555469 | Credible Set | purple |
| chr9:39754805 | 9   | 39.75480 | 0.003010232 | Credible Set | purple |
| chr9:39920209 | 9   | 39.92021 | 0.002512328 | Credible Set | purple |
| chr9:39967389 | 9   | 39.96739 | 0.001665887 | Credible Set | purple |
| chr9:40021684 | 9   | 40.02168 | 0.002365859 | Credible Set | purple |
| chr9:40098115 | 9   | 40.09811 | 0.002289875 | Credible Set | purple |
| chr9:40098581 | 9   | 40.09858 | 0.001942722 | Credible Set | purple |
| chr9:40207245 | 9   | 40.20725 | 0.001895759 | Credible Set | purple |

F34 GBS, routine CBC mean platelet volume

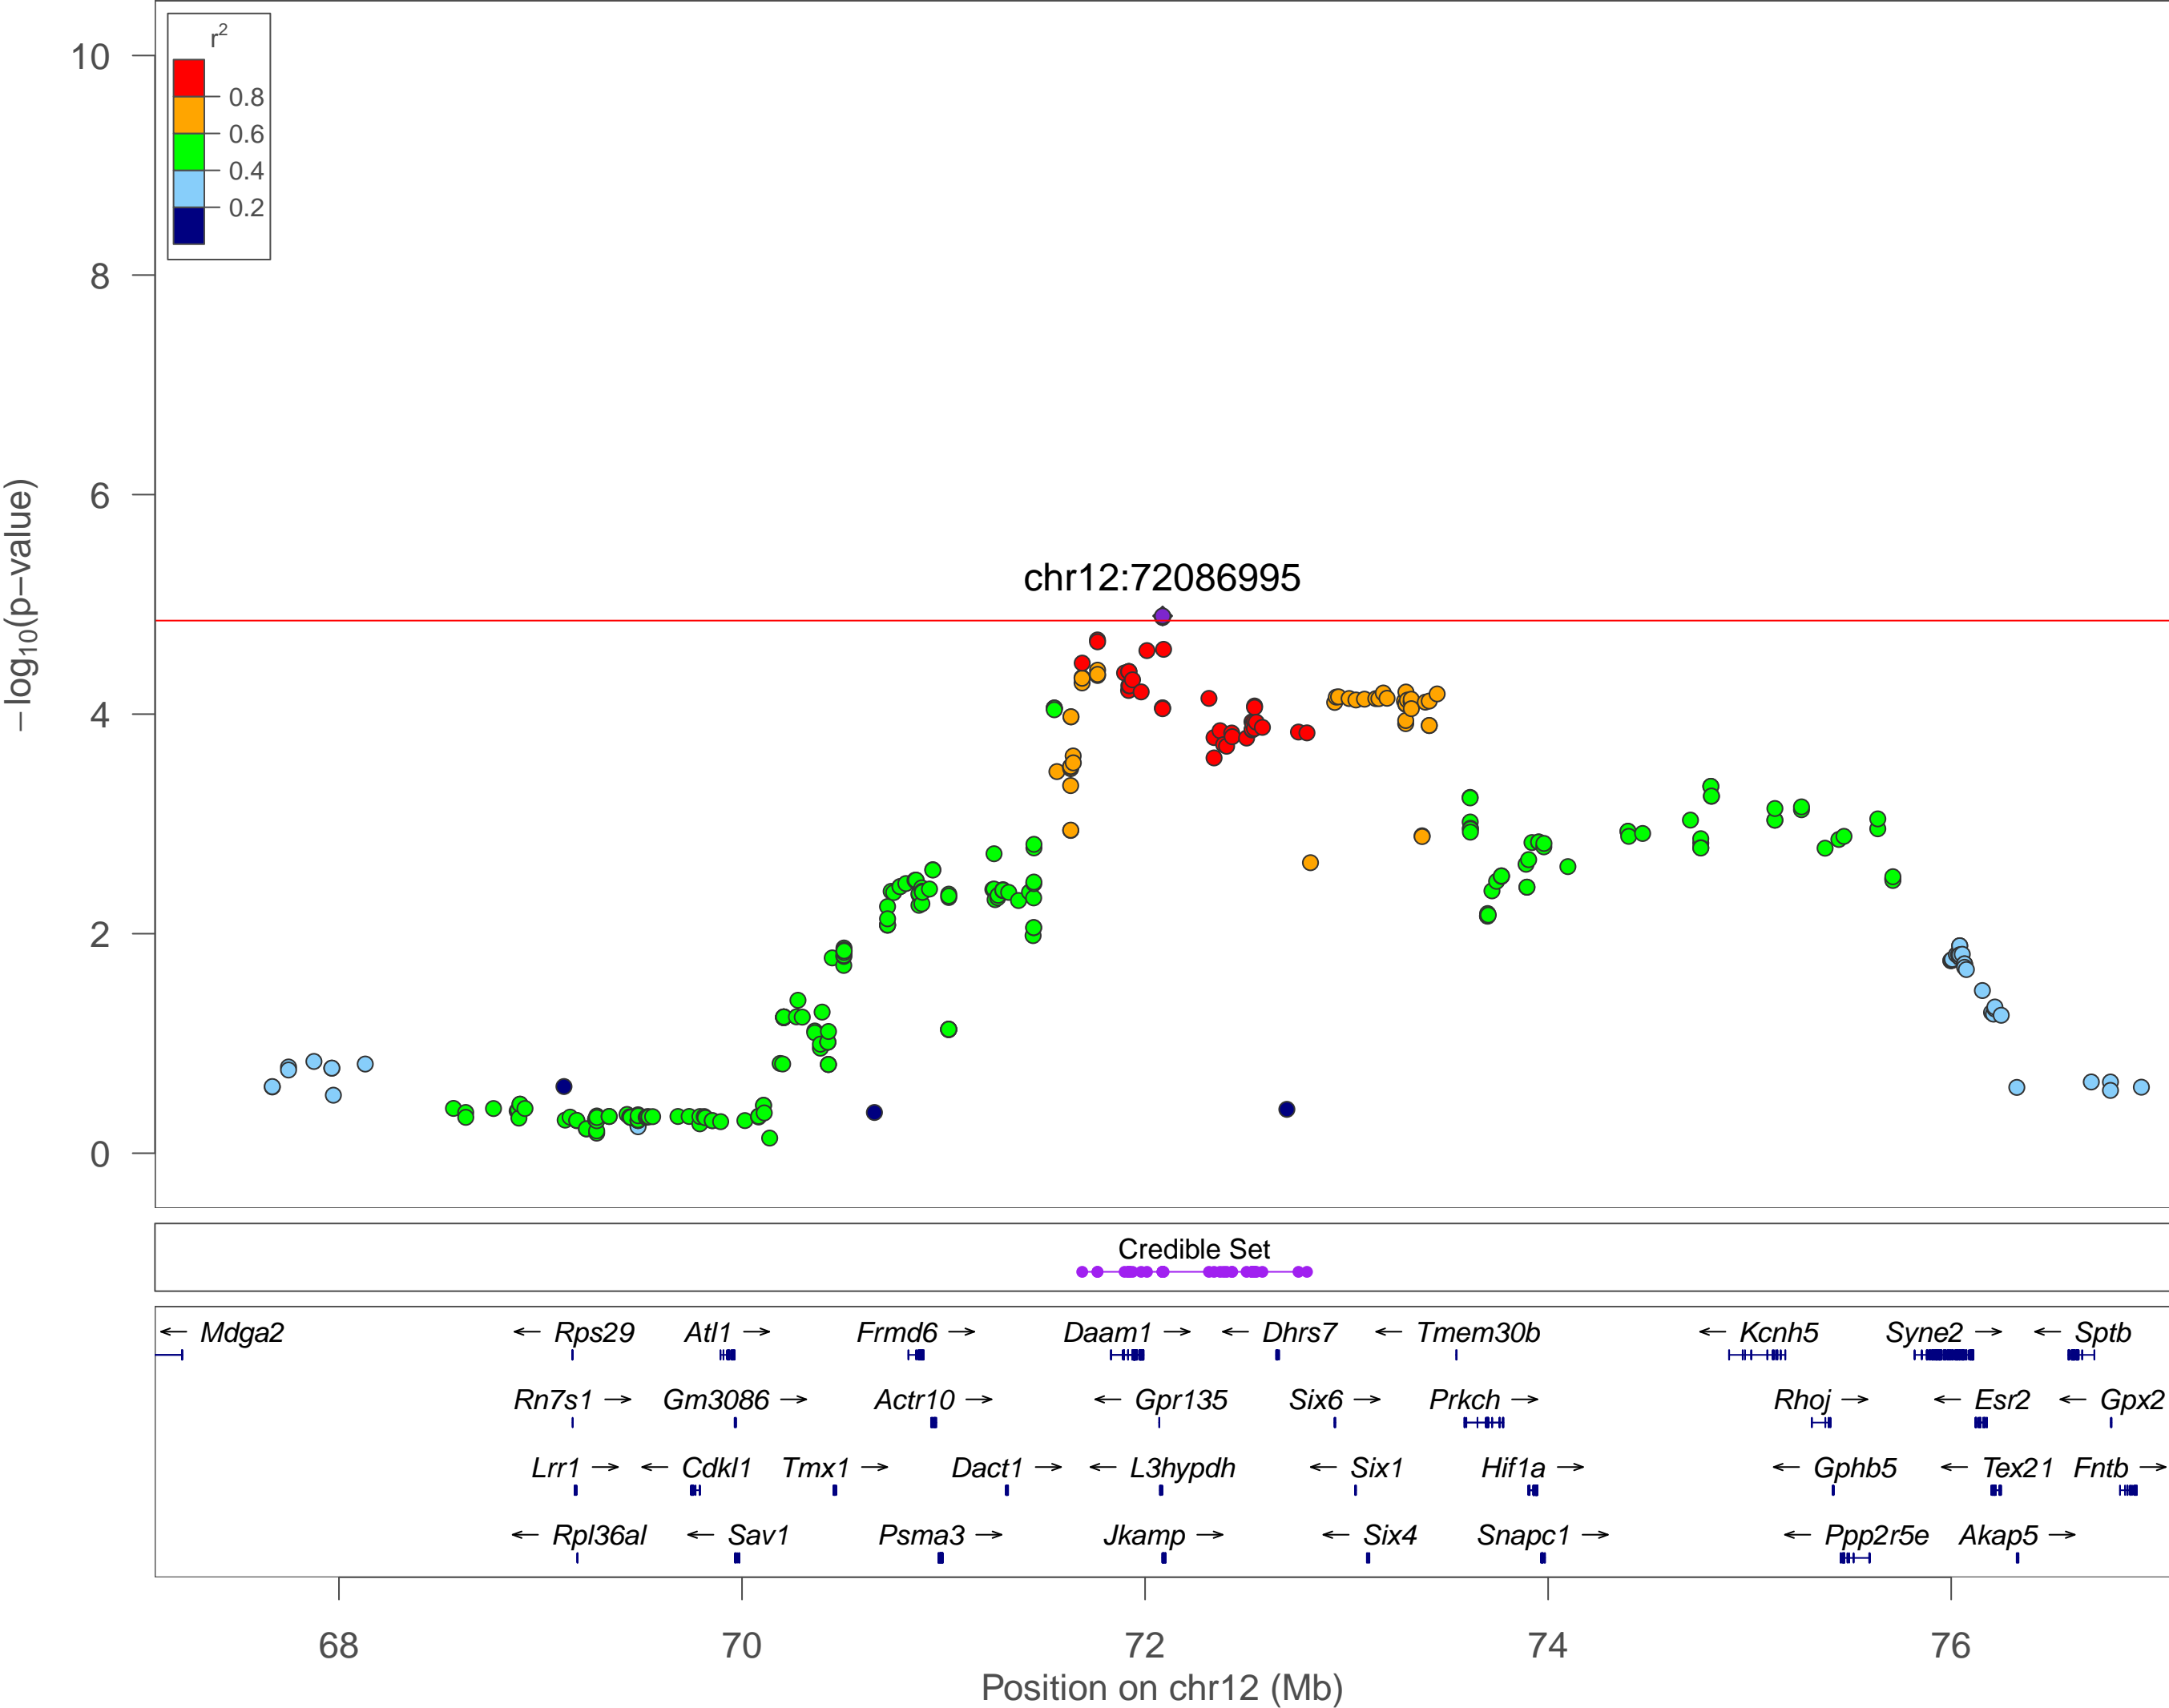

date: Thu Oct 25 17:01:13 2018  
build: F34GBS  
display range: chr12:67086995–77086995 [67086995–77086995]  
hilite range: 0 – 0 [ 0 – 0 ]  
reference SNP: chr12:72086995  
number of SNPs plotted: 340  
min P-value: 1.27E–5 [chr12:72086995]  
max P-value: 7.27E–1 [chr12:70137276]  
omitted Genes: Mgat2, Dnaaf2, 9330151L19Rik  
omitted Genes: Pole2, Klhdc1, Klhdc2  
omitted Genes: Nemf, Rn7s2, Arf6  
omitted Genes: 5830428M24Rik, Vcpkmt, Sos2  
omitted Genes: L2hgdh, Atp5s, Mir681  
omitted Genes: 4930512B01Rik, Map4k5, 4931403G20Rik  
omitted Genes: Nin, Abhd12b, Pygl  
omitted Genes: F730035M05Rik, Trim9, 3110056K07Rik  
omitted Genes: Arid4a, Tomm20l, Timm9  
omitted Genes: 2700049A03Rik, 1700083H02Rik, 4930404H11Rik  
omitted Genes: Ccdc175, Rtn1, Lrrc9  
omitted Genes: Pcnx4, Ppm1a, 4930447C04Rik  
omitted Genes: Mnat1, Trmt5, Slc38a6  
omitted Genes: D830013O20Rik, 2210039B01Rik, Syt16  
omitted Genes: 1700086L19Rik, Dbpht2, Wdr89  
omitted Genes: Rplp2-ps1, Sgpp1, Mir5101  
omitted Genes: Mthfd1, Zbtb25, Zbtb1  
omitted Genes: Hspa2, Ppp1r36, Gm10451  
omitted Genes: Mir5135, Plekhg3, AI463170  
omitted Genes: Churc1, Rab15, Max

## Fine-mapping Regions

| snp            | chr | pos (Mb) | pp          | group        | color  |
|----------------|-----|----------|-------------|--------------|--------|
| chr12:71688023 | 12  | 71.68802 | 0.035804279 | Credible Set | purple |
| chr12:71763688 | 12  | 71.76369 | 0.056816257 | Credible Set | purple |
| chr12:71764110 | 12  | 71.76411 | 0.054725343 | Credible Set | purple |
| chr12:71898279 | 12  | 71.89828 | 0.029427655 | Credible Set | purple |
| chr12:71918314 | 12  | 71.91831 | 0.020766950 | Credible Set | purple |
| chr12:71919408 | 12  | 71.91941 | 0.022845369 | Credible Set | purple |
| chr12:71919477 | 12  | 71.91948 | 0.030259950 | Credible Set | purple |
| chr12:71919515 | 12  | 71.91952 | 0.030291080 | Credible Set | purple |
| chr12:71919520 | 12  | 71.91952 | 0.030291080 | Credible Set | purple |
| chr12:71923446 | 12  | 71.92345 | 0.022812867 | Credible Set | purple |
| chr12:71937615 | 12  | 71.93761 | 0.025669447 | Credible Set | purple |
| chr12:71980528 | 12  | 71.98053 | 0.020187761 | Credible Set | purple |
| chr12:72009199 | 12  | 72.00920 | 0.045918376 | Credible Set | purple |
| chr12:72086662 | 12  | 72.08666 | 0.014723900 | Credible Set | purple |
| chr12:72086706 | 12  | 72.08671 | 0.014634966 | Credible Set | purple |
| chr12:72086724 | 12  | 72.08672 | 0.014459619 | Credible Set | purple |
| chr12:72086792 | 12  | 72.08679 | 0.088935759 | Credible Set | purple |
| chr12:72086995 | 12  | 72.08700 | 0.091752314 | Credible Set | purple |
| chr12:72087027 | 12  | 72.08703 | 0.091238103 | Credible Set | purple |
| chr12:72091767 | 12  | 72.09177 | 0.047107639 | Credible Set | purple |
| chr12:72316934 | 12  | 72.31693 | 0.017748789 | Credible Set | purple |
| chr12:72342228 | 12  | 72.34223 | 0.008174200 | Credible Set | purple |
| chr12:72372220 | 12  | 72.37222 | 0.009361947 | Credible Set | purple |
| chr12:72389901 | 12  | 72.38990 | 0.007115213 | Credible Set | purple |
| chr12:72404532 | 12  | 72.40453 | 0.006890577 | Credible Set | purple |
| chr12:72430018 | 12  | 72.43002 | 0.008940829 | Credible Set | purple |
| chr12:72432423 | 12  | 72.43242 | 0.008317797 | Credible Set | purple |
| chr12:72503712 | 12  | 72.50371 | 0.008093364 | Credible Set | purple |
| chr12:72530507 | 12  | 72.53051 | 0.011173208 | Credible Set | purple |
| chr12:72531030 | 12  | 72.53103 | 0.009498292 | Credible Set | purple |
| chr12:72531036 | 12  | 72.53104 | 0.009612957 | Credible Set | purple |
| chr12:72534336 | 12  | 72.53434 | 0.010714374 | Credible Set | purple |
| chr12:72542646 | 12  | 72.54265 | 0.011189095 | Credible Set | purple |
| chr12:72542706 | 12  | 72.54271 | 0.009769147 | Credible Set | purple |
| chr12:72543184 | 12  | 72.54318 | 0.015260124 | Credible Set | purple |
| chr12:72543205 | 12  | 72.54321 | 0.014846908 | Credible Set | purple |

Fine-mapping Regions

| snp            | chr | pos (Mb) | pp          | group        | color  |
|----------------|-----|----------|-------------|--------------|--------|
| chr12:72551877 | 12  | 72.55188 | 0.011070755 | Credible Set | purple |
| chr12:72582082 | 12  | 72.58208 | 0.009998311 | Credible Set | purple |
| chr12:72761155 | 12  | 72.76116 | 0.009115619 | Credible Set | purple |
| chr12:72803219 | 12  | 72.80322 | 0.008967203 | Credible Set | purple |

# F34 GBS, routine WBC differential white blood cell count

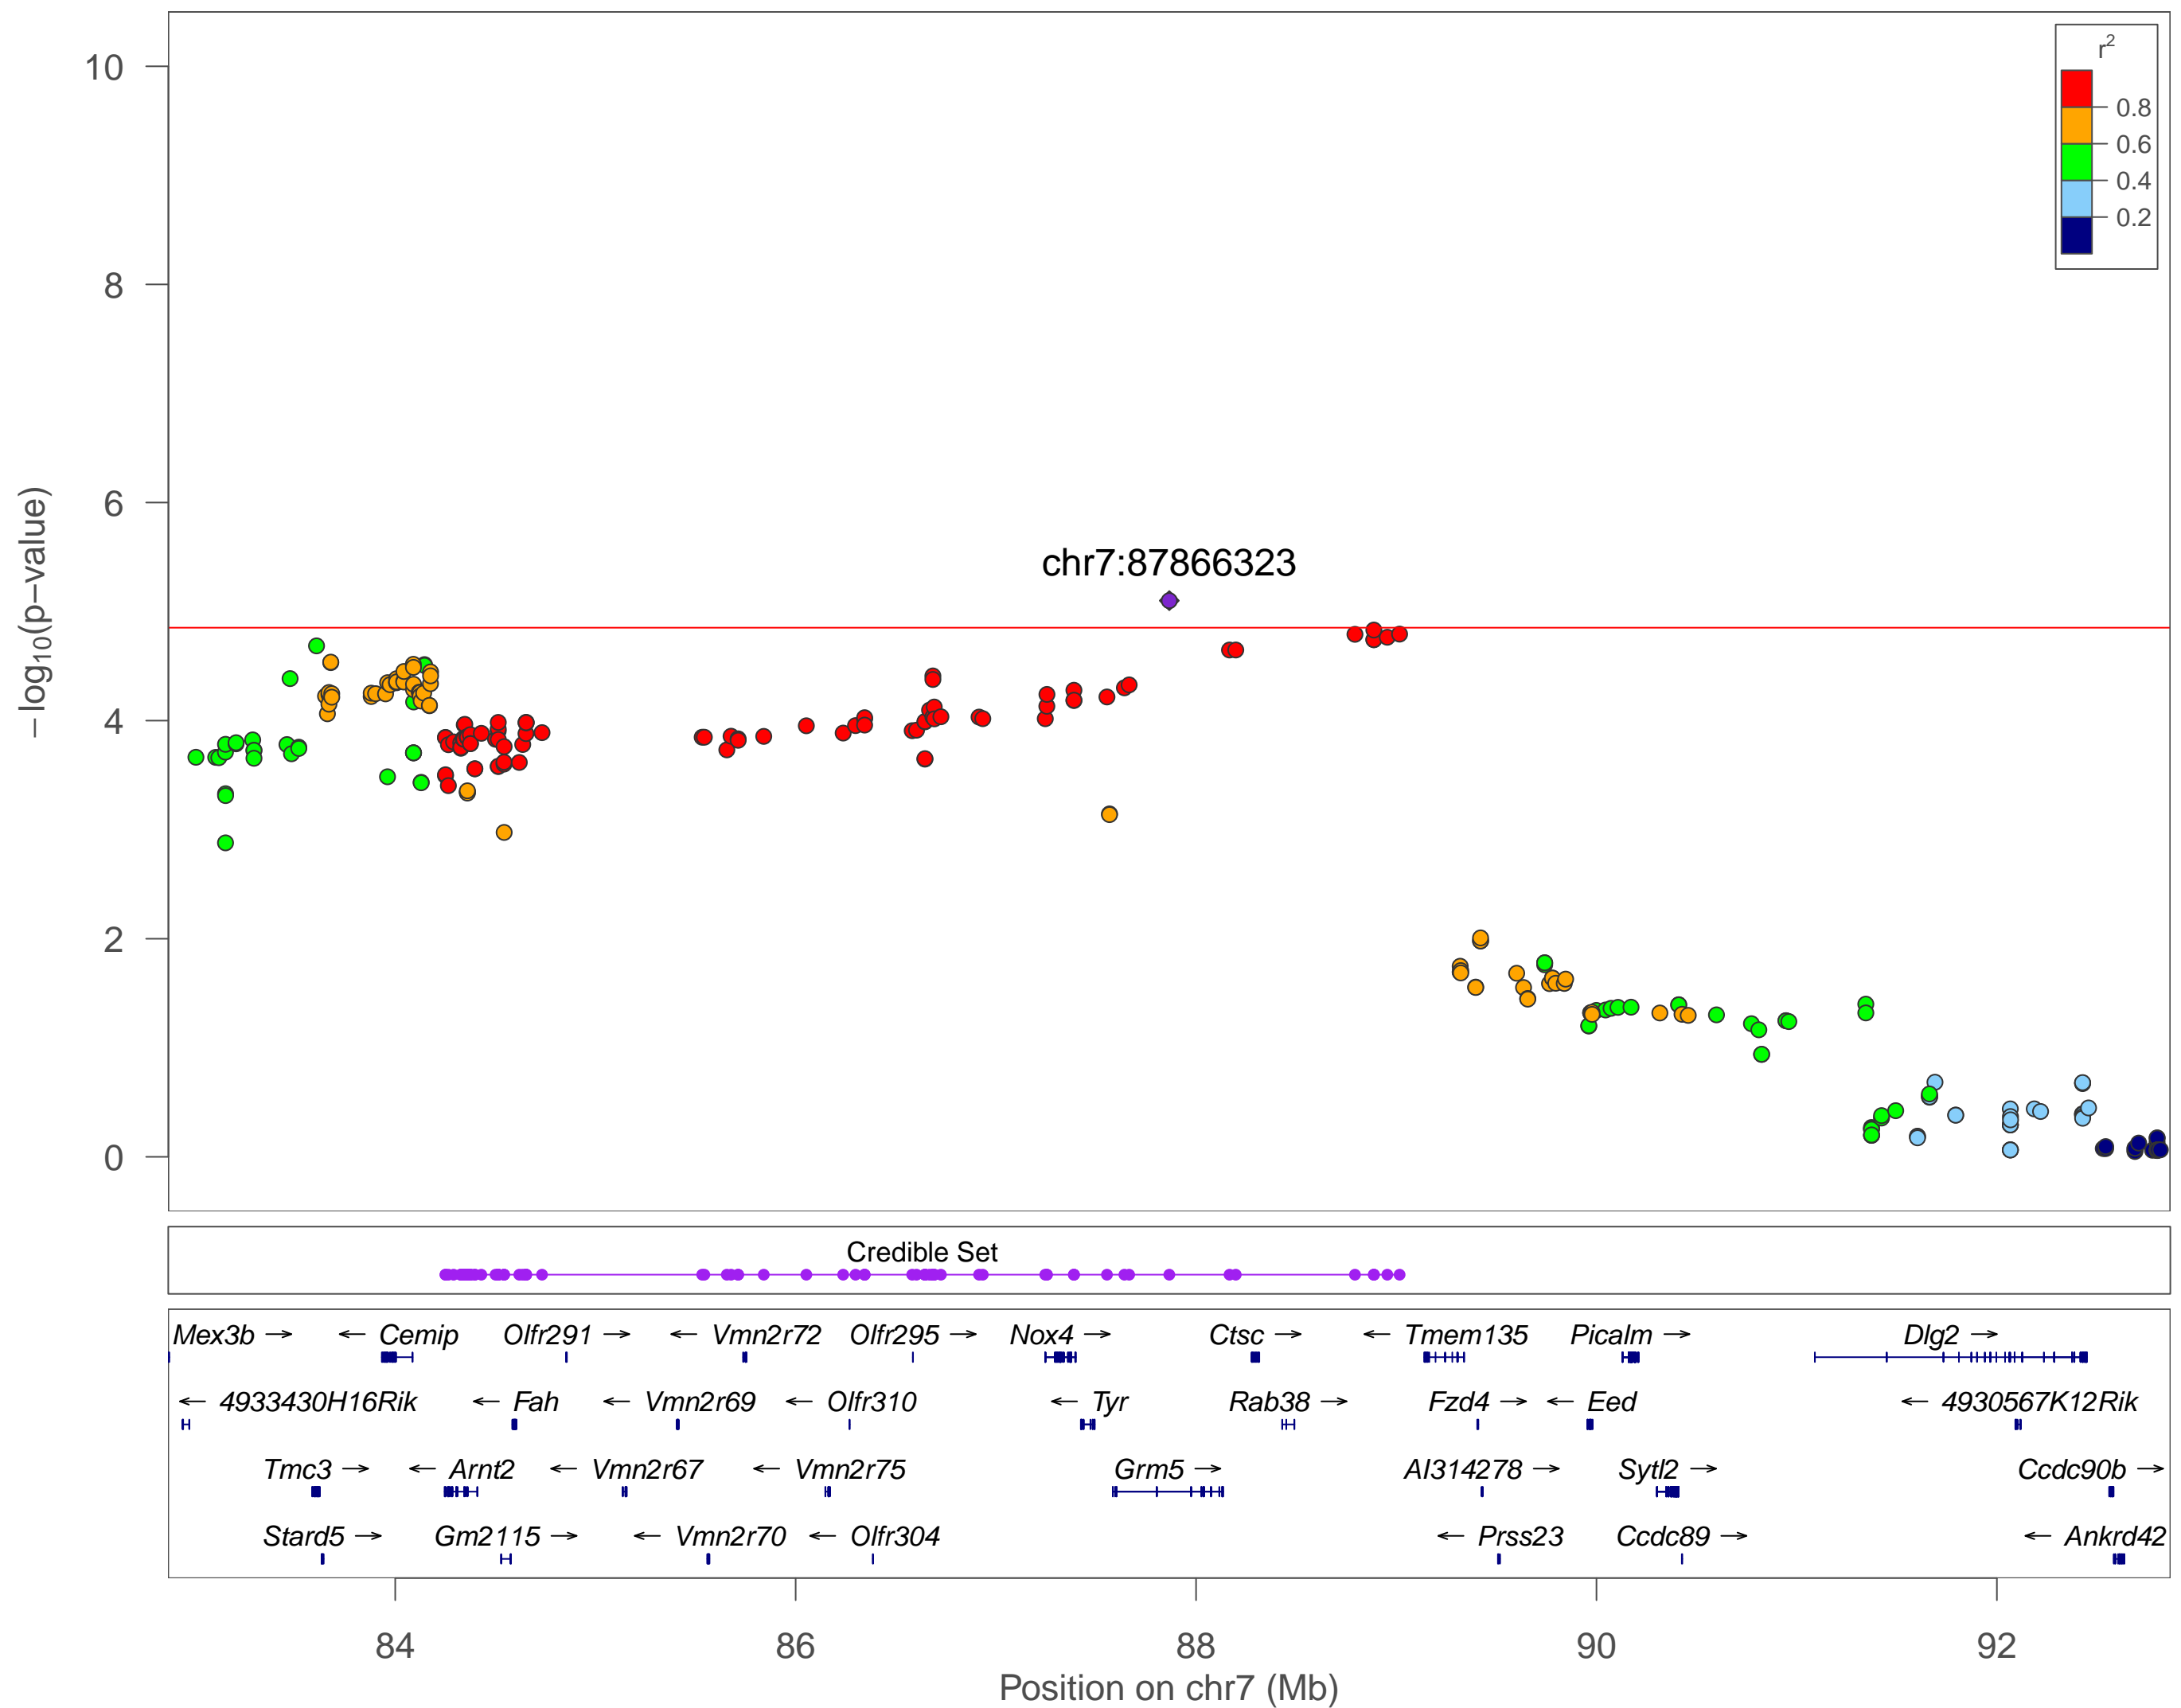

date: Thu Oct 25 17:02:03 2018  
build: F34GBS  
display range: chr7:82866323–92866323 [82866323–92866323]  
hilite range: 0 – 0 [ 0 – 0 ]  
reference SNP: chr7:87866323  
number of SNPs plotted: 272  
min P-value: 7.94E–6 [chr7:87866323]  
max P-value: 8.93E–1 [chr7:92689613]  
omitted Genes: Il16, Cfap161, Mesdc1  
omitted Genes: Mesdc2, Abhd17c, Zfand6  
omitted Genes: 2610206C17Rik, Olfr290, Vmn2r65  
omitted Genes: Vmn2r66, Vmn2r68, Vmn2r71  
omitted Genes: Vmn2r73, Vmn2r74, Vmn2r76  
omitted Genes: Olfr309, Olfr308, Olfr307  
omitted Genes: Olfr305, Olfr303, Olfr301  
omitted Genes: Olfr299, Olfr298, Olfr297  
omitted Genes: Olfr294, Olfr293, Olfr292  
omitted Genes: Folh1, Vmn2r77, Vmn2r78  
omitted Genes: Vmn2r79, Me3, Ccdc81  
omitted Genes: l7Rn6, E230029C05Rik, 2310010J17Rik  
omitted Genes: Ccdc83, Crebzf, Tmem126a  
omitted Genes: Tmem126b, Pcf11, 4632427E13Rik  
omitted Genes: Rab30, Ddias

## Fine-mapping Regions

| snp           | chr | pos (Mb) | pp          | group        | color  |
|---------------|-----|----------|-------------|--------------|--------|
| chr7:84250985 | 7   | 84.25099 | 0.005842461 | Credible Set | purple |
| chr7:84251011 | 7   | 84.25101 | 0.005822474 | Credible Set | purple |
| chr7:84265685 | 7   | 84.26569 | 0.005053687 | Credible Set | purple |
| chr7:84291540 | 7   | 84.29154 | 0.005344684 | Credible Set | purple |
| chr7:84327288 | 7   | 84.32729 | 0.005250490 | Credible Set | purple |
| chr7:84327808 | 7   | 84.32781 | 0.004707908 | Credible Set | purple |
| chr7:84327850 | 7   | 84.32785 | 0.004781219 | Credible Set | purple |
| chr7:84338595 | 7   | 84.33859 | 0.005694824 | Credible Set | purple |
| chr7:84343118 | 7   | 84.34312 | 0.005632570 | Credible Set | purple |
| chr7:84344805 | 7   | 84.34480 | 0.007499805 | Credible Set | purple |
| chr7:84347423 | 7   | 84.34742 | 0.007578390 | Credible Set | purple |
| chr7:84360038 | 7   | 84.36004 | 0.005936887 | Credible Set | purple |
| chr7:84360626 | 7   | 84.36063 | 0.005872583 | Credible Set | purple |
| chr7:84360642 | 7   | 84.36064 | 0.005872583 | Credible Set | purple |
| chr7:84360703 | 7   | 84.36070 | 0.005872583 | Credible Set | purple |
| chr7:84360714 | 7   | 84.36071 | 0.005872583 | Credible Set | purple |
| chr7:84360716 | 7   | 84.36072 | 0.005872583 | Credible Set | purple |
| chr7:84375526 | 7   | 84.37553 | 0.006162539 | Credible Set | purple |
| chr7:84375577 | 7   | 84.37558 | 0.005161287 | Credible Set | purple |
| chr7:84375642 | 7   | 84.37564 | 0.005161287 | Credible Set | purple |
| chr7:84397575 | 7   | 84.39758 | 0.003135446 | Credible Set | purple |
| chr7:84397597 | 7   | 84.39760 | 0.003135446 | Credible Set | purple |
| chr7:84430102 | 7   | 84.43010 | 0.006337133 | Credible Set | purple |
| chr7:84501082 | 7   | 84.50108 | 0.005628534 | Credible Set | purple |
| chr7:84514082 | 7   | 84.51408 | 0.006610877 | Credible Set | purple |
| chr7:84514444 | 7   | 84.51444 | 0.006903711 | Credible Set | purple |
| chr7:84514505 | 7   | 84.51450 | 0.007875050 | Credible Set | purple |
| chr7:84514564 | 7   | 84.51456 | 0.003276428 | Credible Set | purple |
| chr7:84514575 | 7   | 84.51457 | 0.003296762 | Credible Set | purple |
| chr7:84514734 | 7   | 84.51473 | 0.005598543 | Credible Set | purple |
| chr7:84543346 | 7   | 84.54335 | 0.003440904 | Credible Set | purple |
| chr7:84543355 | 7   | 84.54336 | 0.003574188 | Credible Set | purple |
| chr7:84543782 | 7   | 84.54378 | 0.004863619 | Credible Set | purple |
| chr7:84619632 | 7   | 84.61963 | 0.003553096 | Credible Set | purple |
| chr7:84636759 | 7   | 84.63676 | 0.005073750 | Credible Set | purple |
| chr7:84653095 | 7   | 84.65309 | 0.006302011 | Credible Set | purple |



## Fine-mapping Regions

| snp           | chr | pos (Mb) | pp          | group        | color  |
|---------------|-----|----------|-------------|--------------|--------|
| chr7:84653660 | 7   | 84.65366 | 0.007889859 | Credible Set | purple |
| chr7:84653702 | 7   | 84.65370 | 0.007805421 | Credible Set | purple |
| chr7:84653707 | 7   | 84.65371 | 0.007842187 | Credible Set | purple |
| chr7:84733186 | 7   | 84.73319 | 0.006423158 | Credible Set | purple |
| chr7:85533207 | 7   | 85.53321 | 0.005864151 | Credible Set | purple |
| chr7:85543843 | 7   | 85.54384 | 0.005864696 | Credible Set | purple |
| chr7:85656243 | 7   | 85.65624 | 0.004561726 | Credible Set | purple |
| chr7:85677494 | 7   | 85.67749 | 0.005984206 | Credible Set | purple |
| chr7:85712663 | 7   | 85.71266 | 0.005681281 | Credible Set | purple |
| chr7:85712975 | 7   | 85.71298 | 0.005519092 | Credible Set | purple |
| chr7:85840665 | 7   | 85.84067 | 0.005963647 | Credible Set | purple |
| chr7:86053386 | 7   | 86.05339 | 0.007364597 | Credible Set | purple |
| chr7:86237374 | 7   | 86.23737 | 0.006370283 | Credible Set | purple |
| chr7:86298979 | 7   | 86.29898 | 0.007388638 | Credible Set | purple |
| chr7:86344420 | 7   | 86.34442 | 0.008471295 | Credible Set | purple |
| chr7:86344437 | 7   | 86.34444 | 0.008652510 | Credible Set | purple |
| chr7:86344488 | 7   | 86.34449 | 0.007467535 | Credible Set | purple |
| chr7:86582139 | 7   | 86.58214 | 0.006677627 | Credible Set | purple |
| chr7:86603770 | 7   | 86.60377 | 0.006743165 | Credible Set | purple |
| chr7:86645719 | 7   | 86.64572 | 0.003796364 | Credible Set | purple |
| chr7:86645792 | 7   | 86.64579 | 0.003832019 | Credible Set | purple |
| chr7:86645947 | 7   | 86.64595 | 0.007970007 | Credible Set | purple |
| chr7:86645990 | 7   | 86.64599 | 0.008014571 | Credible Set | purple |
| chr7:86668998 | 7   | 86.66900 | 0.010065420 | Credible Set | purple |
| chr7:86685426 | 7   | 86.68543 | 0.019941447 | Credible Set | purple |
| chr7:86685507 | 7   | 86.68551 | 0.018570266 | Credible Set | purple |
| chr7:86685648 | 7   | 86.68565 | 0.008771573 | Credible Set | purple |
| chr7:86692214 | 7   | 86.69221 | 0.010704621 | Credible Set | purple |
| chr7:86692491 | 7   | 86.69249 | 0.008450428 | Credible Set | purple |
| chr7:86725518 | 7   | 86.72552 | 0.008818564 | Credible Set | purple |
| chr7:86916161 | 7   | 86.91616 | 0.008757632 | Credible Set | purple |
| chr7:86934710 | 7   | 86.93471 | 0.008484704 | Credible Set | purple |
| chr7:87246786 | 7   | 87.24679 | 0.008476837 | Credible Set | purple |
| chr7:87254690 | 7   | 87.25469 | 0.010871267 | Credible Set | purple |
| chr7:87255156 | 7   | 87.25516 | 0.013773680 | Credible Set | purple |
| chr7:87389952 | 7   | 87.38995 | 0.014965327 | Credible Set | purple |

Fine-mapping Regions

| snp           | chr | pos (Mb) | pp         | group        | color  |
|---------------|-----|----------|------------|--------------|--------|
| chr7:87389989 | 7   | 87.38999 | 0.01219040 | Credible Set | purple |
| chr7:87390014 | 7   | 87.39001 | 0.01226061 | Credible Set | purple |
| chr7:87554961 | 7   | 87.55496 | 0.01308847 | Credible Set | purple |
| chr7:87642045 | 7   | 87.64204 | 0.01571216 | Credible Set | purple |
| chr7:87665727 | 7   | 87.66573 | 0.01666577 | Credible Set | purple |
| chr7:87866323 | 7   | 87.86632 | 0.09063412 | Credible Set | purple |
| chr7:88167216 | 7   | 88.16722 | 0.03354206 | Credible Set | purple |
| chr7:88198240 | 7   | 88.19824 | 0.03355873 | Credible Set | purple |
| chr7:88793653 | 7   | 88.79365 | 0.04597496 | Credible Set | purple |
| chr7:88888100 | 7   | 88.88810 | 0.04127148 | Credible Set | purple |
| chr7:88888124 | 7   | 88.88812 | 0.04127148 | Credible Set | purple |
| chr7:88888200 | 7   | 88.88820 | 0.05013049 | Credible Set | purple |
| chr7:88955188 | 7   | 88.95519 | 0.04334955 | Credible Set | purple |
| chr7:89016577 | 7   | 89.01658 | 0.04618414 | Credible Set | purple |

F34 GBS, routine WBC differential white blood cell count

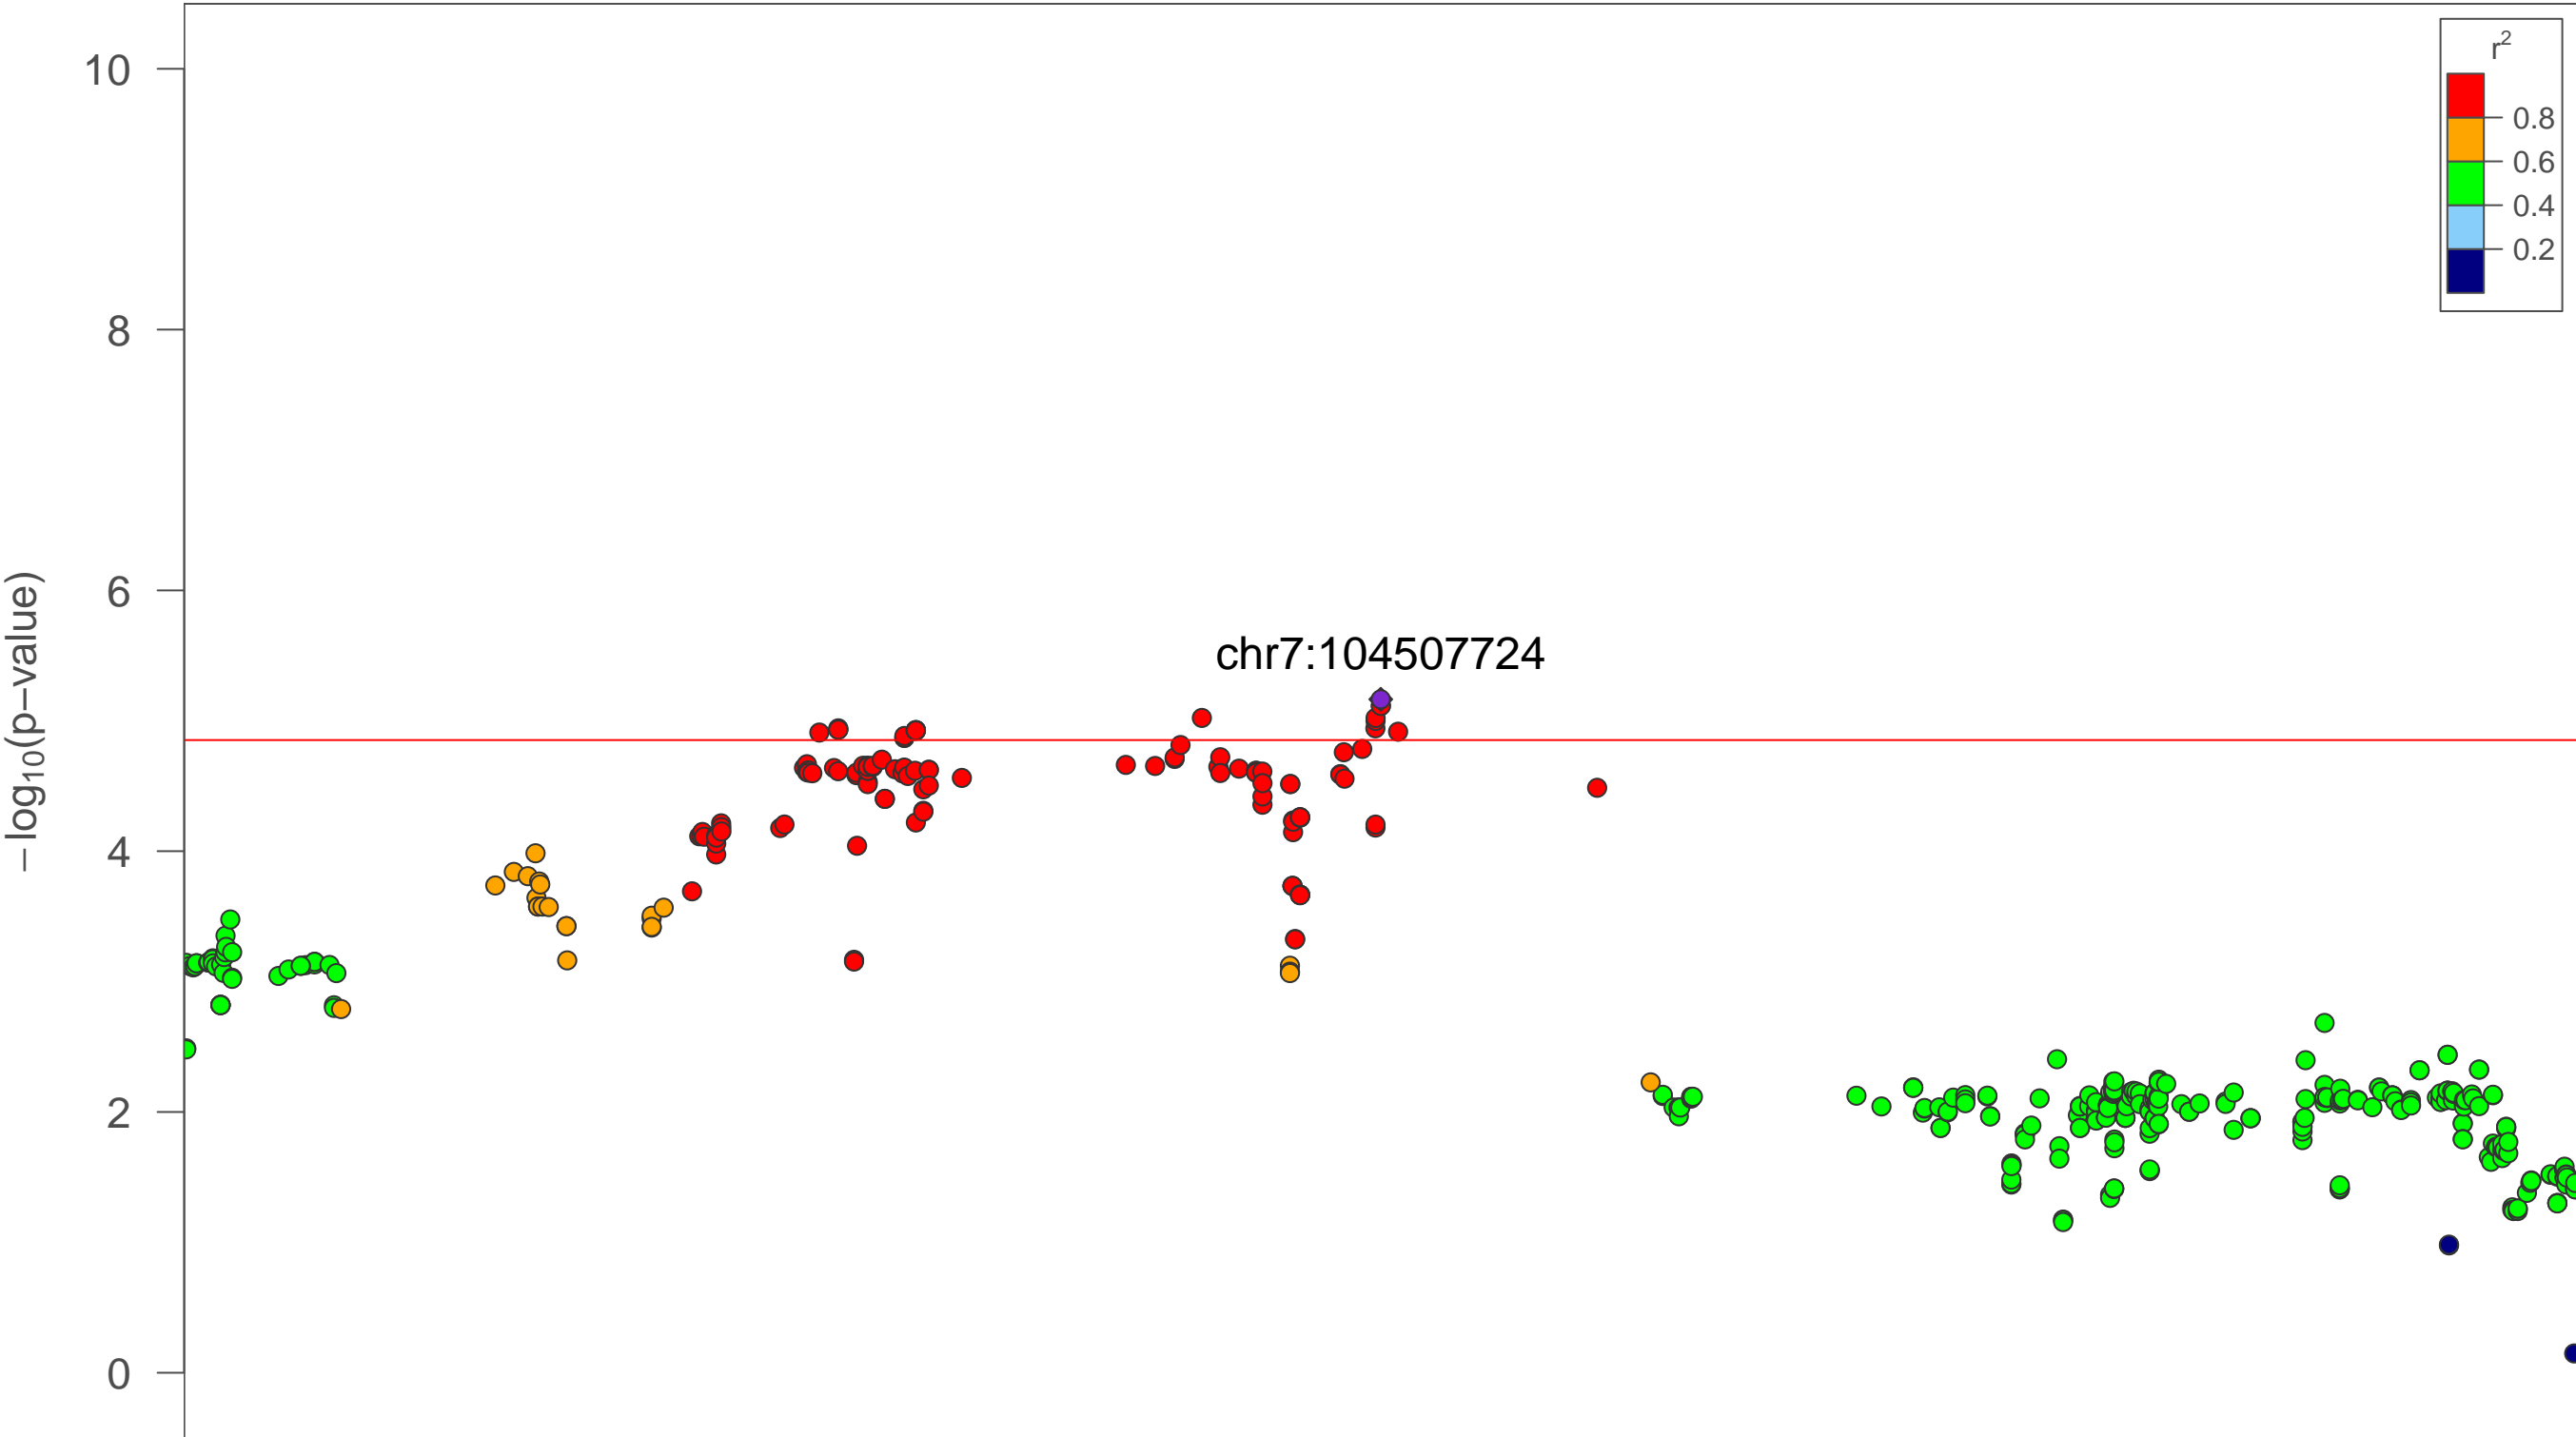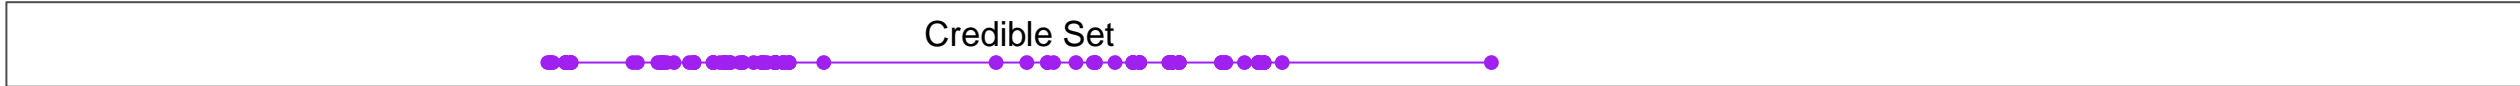

269 genes  
omitted

date: Thu Oct 25 17:01:51 2018

build: F34GBS

display range: chr7:99507724–109507724 [99507724–109507724]

hilite range: 0 – 0 [ 0 – 0 ]

reference SNP: chr7:104507724

number of SNPs plotted: 453

min P-value: 6.84E–6 [chr7:104507724]

max P-value: 7.11E–1 [chr7:109493860]

omitted Genes: Olfr520, Olfr521, Neu3

omitted Genes: Spcs2, Xrra1, Rnf169

omitted Genes: Chrdl2, Pold3, Lipt2

omitted Genes: Kcne3, Pgm2l1, Gpx2-ps1

omitted Genes: P4ha3, Ppme1, C2cd3

omitted Genes: Dnajb13, Mrpl48, Rab6a

omitted Genes: Plekhhb1, Relt, Arhgef17

omitted Genes: Mir3102, P2ry6, P2ry2

omitted Genes: Arap1, Pde2a, Mir139

omitted Genes: Art2a-ps, Clpb, Phox2a

omitted Genes: Inpp1, Folr2, Folr1

omitted Genes: Anapc15, Lamtor1, Lrrc51

omitted Genes: Numa1, Rnf121, Xntrpc

omitted Genes: Trpc2, Art5, Art1

omitted Genes: Chrna10, Nup98, Pgap2

omitted Genes: Stim1, Rrm1, Olfr543

omitted Genes: Olfr544, Olfr545, Olfr547

omitted Genes: Olfr549, Olfr550, Olfr551

omitted Genes: Olfr552, Olfr553, Olfr554

omitted Genes: Olfr555, Olfr556, Trim68

omitted Genes: Olfr557, Olfr558, Olfr559

omitted Genes: Olfr560, Olfr561, Olfr564

omitted Genes: Olfr566, Olfr568, Olfr569

omitted Genes: Olfr570, Olfr571, Olfr572

omitted Genes: Olfr575, Olfr576, Olfr577

omitted Genes: Olfr578, Olfr582, Olfr583

omitted Genes: Olfr584, Olfr585, Olfr586

omitted Genes: Olfr589, Olfr591, Olfr592

omitted Genes: Olfr593, Olfr594, Usp17ld

omitted Genes: Olfr597, Olfr598, Olfr599

omitted Genes: Olfr600, Olfr601, Olfr603

omitted Genes: Usp17lc, Olfr606, Olfr609

Make more plots at <http://csg.sph.umich.edu/locuszoom/>

## Fine-mapping Regions

| snp            | chr | pos (Mb) | pp          | group        | color  |
|----------------|-----|----------|-------------|--------------|--------|
| chr7:101660383 | 7   | 101.6604 | 0.002947822 | Credible Set | purple |
| chr7:101669186 | 7   | 101.6692 | 0.002986122 | Credible Set | purple |
| chr7:101673483 | 7   | 101.6735 | 0.003165845 | Credible Set | purple |
| chr7:101680140 | 7   | 101.6801 | 0.002925323 | Credible Set | purple |
| chr7:101731061 | 7   | 101.7311 | 0.002990668 | Credible Set | purple |
| chr7:101731110 | 7   | 101.7311 | 0.002174403 | Credible Set | purple |
| chr7:101731130 | 7   | 101.7311 | 0.002611160 | Credible Set | purple |
| chr7:101731658 | 7   | 101.7317 | 0.002882023 | Credible Set | purple |
| chr7:101751790 | 7   | 101.7518 | 0.003659142 | Credible Set | purple |
| chr7:101752580 | 7   | 101.7526 | 0.003433699 | Credible Set | purple |
| chr7:101752971 | 7   | 101.7530 | 0.003192238 | Credible Set | purple |
| chr7:101998679 | 7   | 101.9987 | 0.003380757 | Credible Set | purple |
| chr7:102016307 | 7   | 102.0163 | 0.003587087 | Credible Set | purple |
| chr7:102098054 | 7   | 102.0981 | 0.009274583 | Credible Set | purple |
| chr7:102110109 | 7   | 102.1101 | 0.009854129 | Credible Set | purple |
| chr7:102110501 | 7   | 102.1105 | 0.008638142 | Credible Set | purple |
| chr7:102116318 | 7   | 102.1163 | 0.008859280 | Credible Set | purple |
| chr7:102116430 | 7   | 102.1164 | 0.008859280 | Credible Set | purple |
| chr7:102116478 | 7   | 102.1165 | 0.008555806 | Credible Set | purple |
| chr7:102132562 | 7   | 102.1326 | 0.008467642 | Credible Set | purple |
| chr7:102162058 | 7   | 102.1621 | 0.016793280 | Credible Set | purple |
| chr7:102223396 | 7   | 102.2234 | 0.009244404 | Credible Set | purple |
| chr7:102240695 | 7   | 102.2407 | 0.008762541 | Credible Set | purple |
| chr7:102241191 | 7   | 102.2412 | 0.018032301 | Credible Set | purple |
| chr7:102241211 | 7   | 102.2412 | 0.017605212 | Credible Set | purple |
| chr7:102241212 | 7   | 102.2412 | 0.017636586 | Credible Set | purple |
| chr7:102317213 | 7   | 102.3172 | 0.008197054 | Credible Set | purple |
| chr7:102317246 | 7   | 102.3172 | 0.008540130 | Credible Set | purple |
| chr7:102319586 | 7   | 102.3196 | 0.002515012 | Credible Set | purple |
| chr7:102344970 | 7   | 102.3450 | 0.009606139 | Credible Set | purple |
| chr7:102363897 | 7   | 102.3639 | 0.009620264 | Credible Set | purple |
| chr7:102364204 | 7   | 102.3642 | 0.007336519 | Credible Set | purple |
| chr7:102364223 | 7   | 102.3642 | 0.007054151 | Credible Set | purple |
| chr7:102364315 | 7   | 102.3643 | 0.008821599 | Credible Set | purple |
| chr7:102364326 | 7   | 102.3643 | 0.008821599 | Credible Set | purple |
| chr7:102364411 | 7   | 102.3644 | 0.009415387 | Credible Set | purple |

## Fine-mapping Regions

| snp            | chr | pos (Mb) | pp          | group        | color  |
|----------------|-----|----------|-------------|--------------|--------|
| chr7:102385520 | 7   | 102.3855 | 0.009422644 | Credible Set | purple |
| chr7:102385536 | 7   | 102.3855 | 0.009588643 | Credible Set | purple |
| chr7:102423165 | 7   | 102.4232 | 0.010639022 | Credible Set | purple |
| chr7:102435692 | 7   | 102.4357 | 0.005507396 | Credible Set | purple |
| chr7:102435720 | 7   | 102.4357 | 0.005507396 | Credible Set | purple |
| chr7:102478469 | 7   | 102.4785 | 0.009058694 | Credible Set | purple |
| chr7:102510475 | 7   | 102.5105 | 0.008575601 | Credible Set | purple |
| chr7:102510607 | 7   | 102.5106 | 0.008430344 | Credible Set | purple |
| chr7:102516878 | 7   | 102.5169 | 0.009321505 | Credible Set | purple |
| chr7:102517238 | 7   | 102.5172 | 0.015357203 | Credible Set | purple |
| chr7:102517241 | 7   | 102.5172 | 0.015341995 | Credible Set | purple |
| chr7:102517247 | 7   | 102.5172 | 0.015863699 | Credible Set | purple |
| chr7:102531652 | 7   | 102.5317 | 0.008086830 | Credible Set | purple |
| chr7:102561708 | 7   | 102.5617 | 0.008830154 | Credible Set | purple |
| chr7:102565262 | 7   | 102.5653 | 0.017490592 | Credible Set | purple |
| chr7:102565292 | 7   | 102.5653 | 0.017347028 | Credible Set | purple |
| chr7:102565307 | 7   | 102.5653 | 0.017521476 | Credible Set | purple |
| chr7:102565323 | 7   | 102.5653 | 0.017377646 | Credible Set | purple |
| chr7:102565329 | 7   | 102.5653 | 0.017377646 | Credible Set | purple |
| chr7:102565410 | 7   | 102.5654 | 0.003709602 | Credible Set | purple |
| chr7:102596442 | 7   | 102.5964 | 0.006464016 | Credible Set | purple |
| chr7:102596578 | 7   | 102.5966 | 0.004511411 | Credible Set | purple |
| chr7:102596636 | 7   | 102.5966 | 0.004443758 | Credible Set | purple |
| chr7:102619418 | 7   | 102.6194 | 0.008982864 | Credible Set | purple |
| chr7:102619431 | 7   | 102.6194 | 0.008957417 | Credible Set | purple |
| chr7:102619466 | 7   | 102.6195 | 0.006884649 | Credible Set | purple |
| chr7:102757499 | 7   | 102.7575 | 0.007829380 | Credible Set | purple |
| chr7:103442570 | 7   | 103.4426 | 0.009741931 | Credible Set | purple |
| chr7:103564836 | 7   | 103.5648 | 0.009571513 | Credible Set | purple |
| chr7:103646439 | 7   | 103.6464 | 0.010767138 | Credible Set | purple |
| chr7:103646709 | 7   | 103.6467 | 0.011039266 | Credible Set | purple |
| chr7:103671033 | 7   | 103.6710 | 0.013611164 | Credible Set | purple |
| chr7:103760301 | 7   | 103.7603 | 0.021492054 | Credible Set | purple |
| chr7:103829200 | 7   | 103.8292 | 0.009423901 | Credible Set | purple |
| chr7:103837099 | 7   | 103.8371 | 0.011088190 | Credible Set | purple |
| chr7:103837213 | 7   | 103.8372 | 0.008502119 | Credible Set | purple |

## Fine-mapping Regions

| snp            | chr | pos (Mb) | pp          | group        | color  |
|----------------|-----|----------|-------------|--------------|--------|
| chr7:103915503 | 7   | 103.9155 | 0.009147836 | Credible Set | purple |
| chr7:103986792 | 7   | 103.9868 | 0.008826500 | Credible Set | purple |
| chr7:103986795 | 7   | 103.9868 | 0.008826500 | Credible Set | purple |
| chr7:103986857 | 7   | 103.9869 | 0.008548117 | Credible Set | purple |
| chr7:103986860 | 7   | 103.9869 | 0.008548117 | Credible Set | purple |
| chr7:104012808 | 7   | 104.0128 | 0.008714889 | Credible Set | purple |
| chr7:104013370 | 7   | 104.0134 | 0.004993329 | Credible Set | purple |
| chr7:104013395 | 7   | 104.0134 | 0.005737745 | Credible Set | purple |
| chr7:104013467 | 7   | 104.0135 | 0.007168033 | Credible Set | purple |
| chr7:104129734 | 7   | 104.1297 | 0.007066361 | Credible Set | purple |
| chr7:104129736 | 7   | 104.1297 | 0.007066361 | Credible Set | purple |
| chr7:104138936 | 7   | 104.1389 | 0.001289798 | Credible Set | purple |
| chr7:104138968 | 7   | 104.1390 | 0.001289798 | Credible Set | purple |
| chr7:104141343 | 7   | 104.1413 | 0.003154168 | Credible Set | purple |
| chr7:104141705 | 7   | 104.1417 | 0.003837844 | Credible Set | purple |
| chr7:104141768 | 7   | 104.1418 | 0.003756126 | Credible Set | purple |
| chr7:104170588 | 7   | 104.1706 | 0.004039617 | Credible Set | purple |
| chr7:104170594 | 7   | 104.1706 | 0.004024903 | Credible Set | purple |
| chr7:104170618 | 7   | 104.1706 | 0.004047853 | Credible Set | purple |
| chr7:104170662 | 7   | 104.1707 | 0.004047853 | Credible Set | purple |
| chr7:104338784 | 7   | 104.3388 | 0.008341737 | Credible Set | purple |
| chr7:104338810 | 7   | 104.3388 | 0.008275938 | Credible Set | purple |
| chr7:104353491 | 7   | 104.3535 | 0.012048517 | Credible Set | purple |
| chr7:104356230 | 7   | 104.3562 | 0.007725665 | Credible Set | purple |
| chr7:104430205 | 7   | 104.4302 | 0.012740275 | Credible Set | purple |
| chr7:104485236 | 7   | 104.4852 | 0.018029211 | Credible Set | purple |
| chr7:104485721 | 7   | 104.4857 | 0.003407890 | Credible Set | purple |
| chr7:104485727 | 7   | 104.4857 | 0.003581521 | Credible Set | purple |
| chr7:104486022 | 7   | 104.4860 | 0.020443497 | Credible Set | purple |
| chr7:104486041 | 7   | 104.4860 | 0.021482585 | Credible Set | purple |
| chr7:104507724 | 7   | 104.5077 | 0.029421529 | Credible Set | purple |
| chr7:104508127 | 7   | 104.5081 | 0.026461520 | Credible Set | purple |
| chr7:104508173 | 7   | 104.5082 | 0.026290096 | Credible Set | purple |
| chr7:104580091 | 7   | 104.5801 | 0.017032766 | Credible Set | purple |
| chr7:105411752 | 7   | 105.4118 | 0.006632638 | Credible Set | purple |

# F34 GBS, routine WBC differential white blood cell count

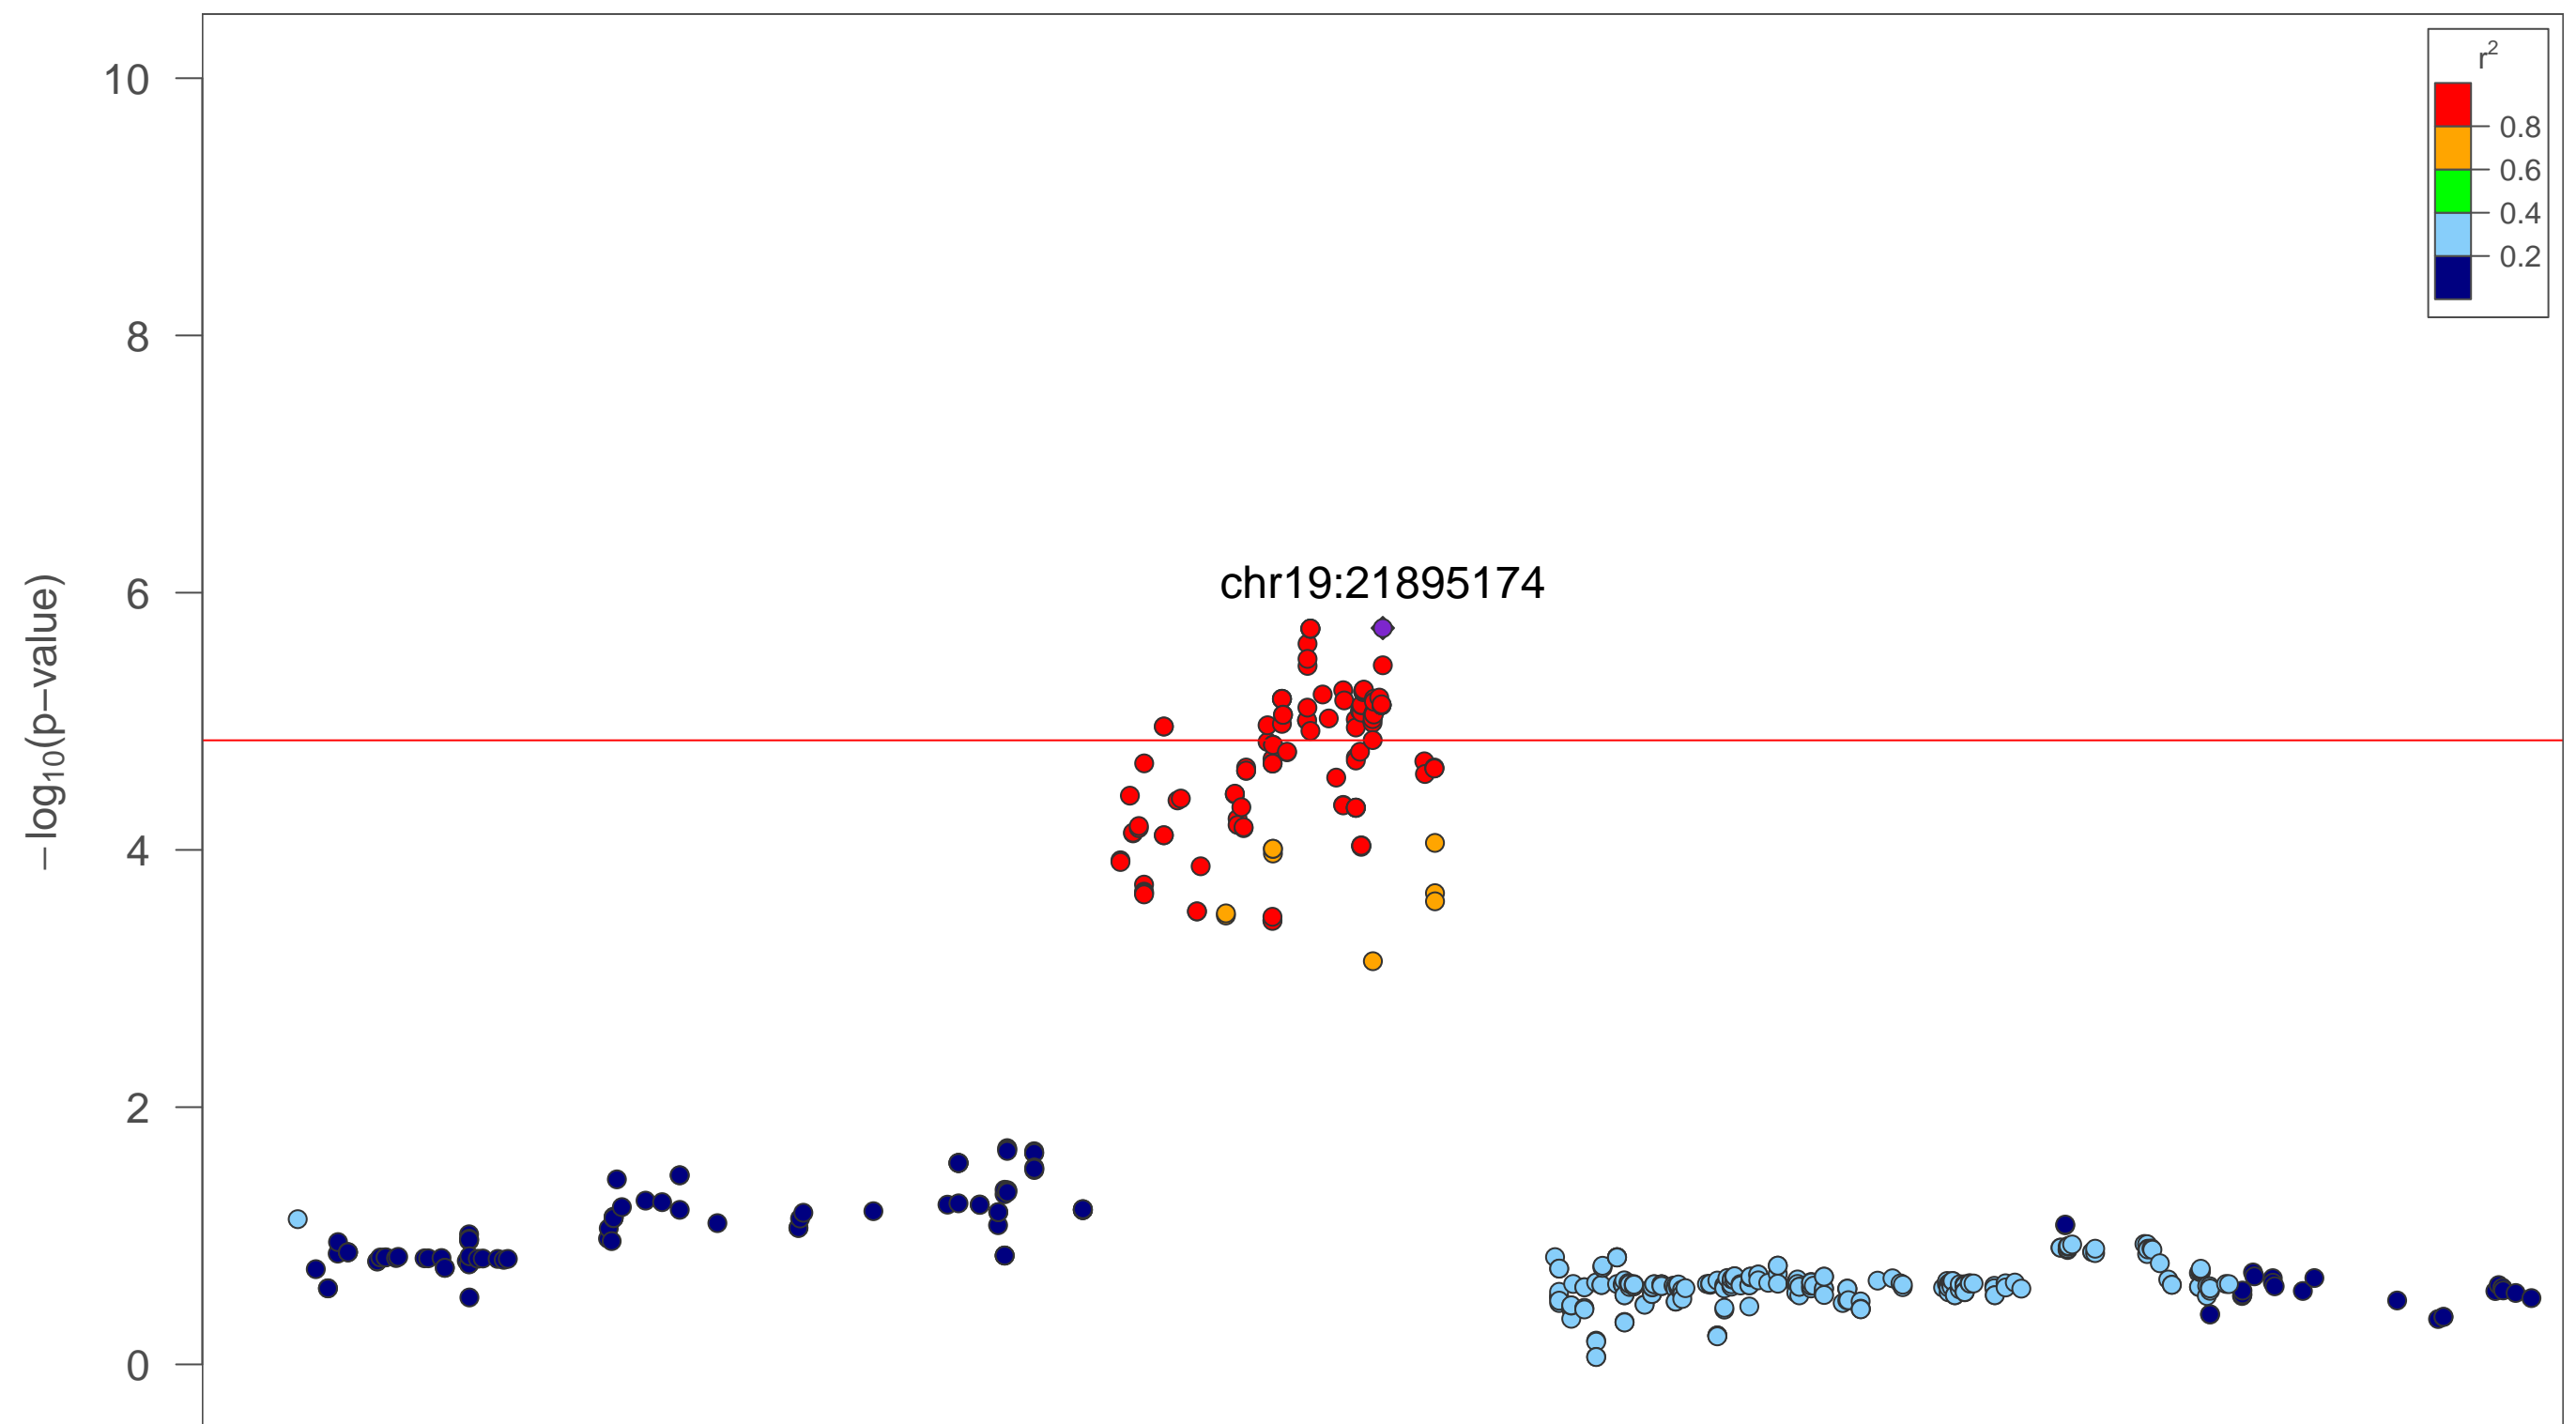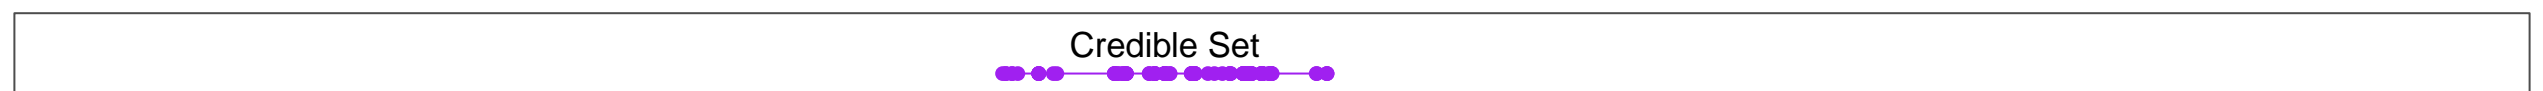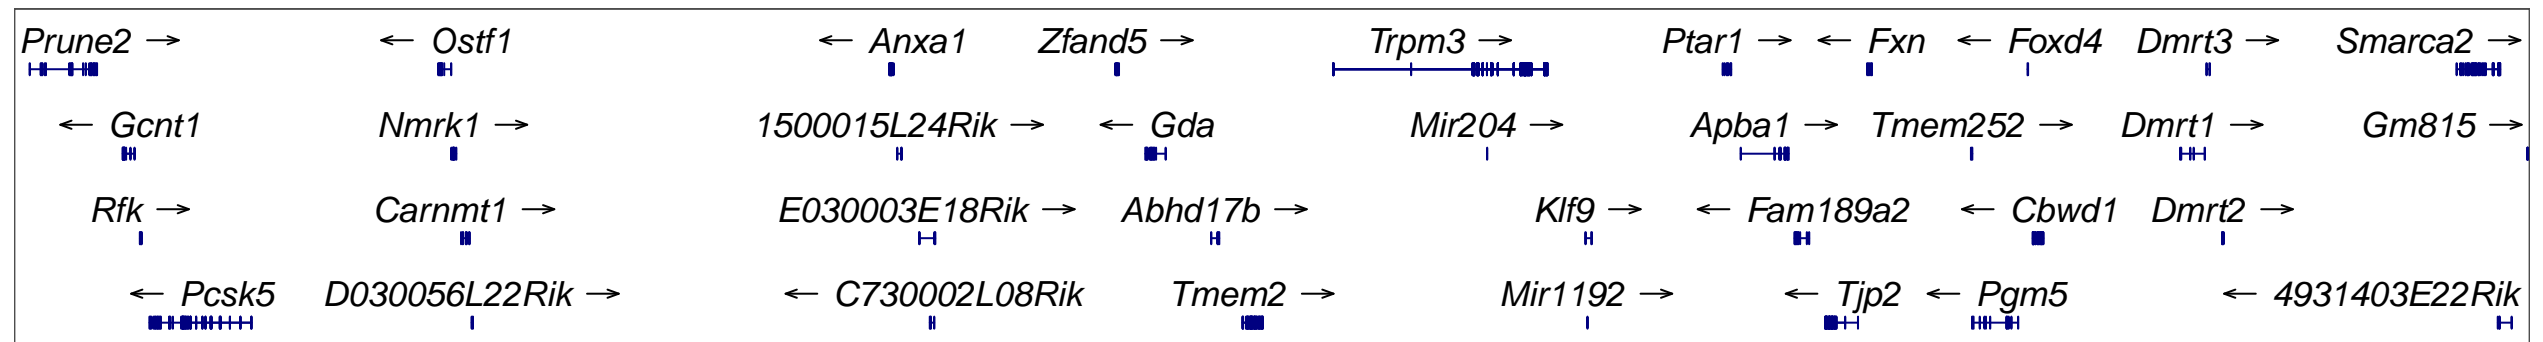

16 genes  
omitted

Position on chr19 (Mb)



date: Thu Oct 25 17:01:36 2018

build: F34GBS

display range: chr19:16895174–26895174 [16895174–26895174]

hilite range: 0 – 0 [ 0 – 0 ]

reference SNP: chr19:21895174

number of SNPs plotted: 470

min P-value: 1.88E–6 [chr19:21895174]

max P-value: 8.76E–1 [chr19:22798742]

omitted Genes: Trpm6, Rorb, Aldh1a1

omitted Genes: Aldh1a7, Tmc1, 4930554I06Rik

omitted Genes: 1110059E24Rik, Smc5, Mamdc2

omitted Genes: 1700028P14Rik, Pip5k1b, Fam122a

omitted Genes: Mir3084–1, Dock8, Kank1

omitted Genes: 2610016A17Rik

## Fine-mapping Regions

| snp            | chr | pos (Mb) | pp          | group        | color  |
|----------------|-----|----------|-------------|--------------|--------|
| chr19:20824062 | 19  | 20.82406 | 0.002585794 | Credible Set | purple |
| chr19:20837340 | 19  | 20.83734 | 0.001363790 | Credible Set | purple |
| chr19:20837342 | 19  | 20.83734 | 0.001382413 | Credible Set | purple |
| chr19:20861811 | 19  | 20.86181 | 0.001489729 | Credible Set | purple |
| chr19:20861821 | 19  | 20.86182 | 0.001545357 | Credible Set | purple |
| chr19:20884530 | 19  | 20.88453 | 0.004479106 | Credible Set | purple |
| chr19:20967742 | 19  | 20.96774 | 0.001319861 | Credible Set | purple |
| chr19:20967772 | 19  | 20.96777 | 0.001322070 | Credible Set | purple |
| chr19:20967840 | 19  | 20.96784 | 0.008395932 | Credible Set | purple |
| chr19:20967865 | 19  | 20.96786 | 0.008409044 | Credible Set | purple |
| chr19:21025668 | 19  | 21.02567 | 0.002384590 | Credible Set | purple |
| chr19:21039744 | 19  | 21.03974 | 0.002462130 | Credible Set | purple |
| chr19:21268525 | 19  | 21.26853 | 0.002643325 | Credible Set | purple |
| chr19:21268527 | 19  | 21.26853 | 0.002651431 | Credible Set | purple |
| chr19:21268550 | 19  | 21.26855 | 0.002674964 | Credible Set | purple |
| chr19:21280282 | 19  | 21.28028 | 0.001746321 | Credible Set | purple |
| chr19:21280286 | 19  | 21.28029 | 0.001572745 | Credible Set | purple |
| chr19:21296098 | 19  | 21.29610 | 0.002126306 | Credible Set | purple |
| chr19:21305518 | 19  | 21.30552 | 0.001490133 | Credible Set | purple |
| chr19:21305568 | 19  | 21.30557 | 0.001515579 | Credible Set | purple |
| chr19:21316234 | 19  | 21.31623 | 0.004175380 | Credible Set | purple |
| chr19:21316268 | 19  | 21.31627 | 0.003944184 | Credible Set | purple |
| chr19:21316305 | 19  | 21.31630 | 0.003962344 | Credible Set | purple |
| chr19:21407108 | 19  | 21.40711 | 0.006454658 | Credible Set | purple |
| chr19:21407182 | 19  | 21.40718 | 0.008588335 | Credible Set | purple |
| chr19:21428151 | 19  | 21.42815 | 0.004829997 | Credible Set | purple |
| chr19:21428338 | 19  | 21.42834 | 0.004467193 | Credible Set | purple |
| chr19:21428343 | 19  | 21.42834 | 0.004467193 | Credible Set | purple |
| chr19:21430361 | 19  | 21.43036 | 0.006153998 | Credible Set | purple |
| chr19:21430412 | 19  | 21.43041 | 0.006138345 | Credible Set | purple |
| chr19:21467882 | 19  | 21.46788 | 0.008793568 | Credible Set | purple |
| chr19:21467967 | 19  | 21.46797 | 0.013428357 | Credible Set | purple |
| chr19:21467982 | 19  | 21.46798 | 0.013506313 | Credible Set | purple |
| chr19:21467985 | 19  | 21.46798 | 0.013506313 | Credible Set | purple |
| chr19:21467987 | 19  | 21.46799 | 0.013467367 | Credible Set | purple |
| chr19:21472509 | 19  | 21.47251 | 0.010292809 | Credible Set | purple |

## Fine-mapping Regions

| snp            | chr | pos (Mb) | pp          | group        | color  |
|----------------|-----|----------|-------------|--------------|--------|
| chr19:21472526 | 19  | 21.47253 | 0.010257024 | Credible Set | purple |
| chr19:21489550 | 19  | 21.48955 | 0.005412916 | Credible Set | purple |
| chr19:21489579 | 19  | 21.48958 | 0.005467641 | Credible Set | purple |
| chr19:21574198 | 19  | 21.57420 | 0.009320179 | Credible Set | purple |
| chr19:21574202 | 19  | 21.57420 | 0.009346112 | Credible Set | purple |
| chr19:21575782 | 19  | 21.57578 | 0.011615154 | Credible Set | purple |
| chr19:21576364 | 19  | 21.57636 | 0.034714558 | Credible Set | purple |
| chr19:21576365 | 19  | 21.57636 | 0.023734065 | Credible Set | purple |
| chr19:21576374 | 19  | 21.57637 | 0.026780454 | Credible Set | purple |
| chr19:21588462 | 19  | 21.58846 | 0.045063501 | Credible Set | purple |
| chr19:21588470 | 19  | 21.58847 | 0.045005342 | Credible Set | purple |
| chr19:21588527 | 19  | 21.58853 | 0.044776888 | Credible Set | purple |
| chr19:21588528 | 19  | 21.58853 | 0.045107340 | Credible Set | purple |
| chr19:21588608 | 19  | 21.58861 | 0.007800315 | Credible Set | purple |
| chr19:21640403 | 19  | 21.64040 | 0.014535903 | Credible Set | purple |
| chr19:21666239 | 19  | 21.66624 | 0.009647457 | Credible Set | purple |
| chr19:21697884 | 19  | 21.69788 | 0.003516256 | Credible Set | purple |
| chr19:21727318 | 19  | 21.72732 | 0.002211662 | Credible Set | purple |
| chr19:21727391 | 19  | 21.72739 | 0.002191642 | Credible Set | purple |
| chr19:21727561 | 19  | 21.72756 | 0.015647139 | Credible Set | purple |
| chr19:21731633 | 19  | 21.73163 | 0.013131097 | Credible Set | purple |
| chr19:21780788 | 19  | 21.78079 | 0.009483067 | Credible Set | purple |
| chr19:21780850 | 19  | 21.78085 | 0.008262784 | Credible Set | purple |
| chr19:21780922 | 19  | 21.78092 | 0.002102234 | Credible Set | purple |
| chr19:21780928 | 19  | 21.78093 | 0.002099716 | Credible Set | purple |
| chr19:21780934 | 19  | 21.78093 | 0.002111114 | Credible Set | purple |
| chr19:21780935 | 19  | 21.78093 | 0.002111114 | Credible Set | purple |
| chr19:21781005 | 19  | 21.78101 | 0.004950729 | Credible Set | purple |
| chr19:21781019 | 19  | 21.78102 | 0.004702405 | Credible Set | purple |
| chr19:21798450 | 19  | 21.79845 | 0.010984485 | Credible Set | purple |
| chr19:21798541 | 19  | 21.79854 | 0.005465049 | Credible Set | purple |
| chr19:21803806 | 19  | 21.80381 | 0.001112543 | Credible Set | purple |
| chr19:21804356 | 19  | 21.80436 | 0.010674368 | Credible Set | purple |
| chr19:21804420 | 19  | 21.80442 | 0.012092035 | Credible Set | purple |
| chr19:21804582 | 19  | 21.80458 | 0.012166277 | Credible Set | purple |
| chr19:21812258 | 19  | 21.81226 | 0.015158100 | Credible Set | purple |

## Fine-mapping Regions

| snp            | chr | pos (Mb) | pp          | group        | color  |
|----------------|-----|----------|-------------|--------------|--------|
| chr19:21812298 | 19  | 21.81230 | 0.015237991 | Credible Set | purple |
| chr19:21812594 | 19  | 21.81259 | 0.015614975 | Credible Set | purple |
| chr19:21814790 | 19  | 21.81479 | 0.015708525 | Credible Set | purple |
| chr19:21814806 | 19  | 21.81481 | 0.015794260 | Credible Set | purple |
| chr19:21851795 | 19  | 21.85179 | 0.008952670 | Credible Set | purple |
| chr19:21852236 | 19  | 21.85224 | 0.010187775 | Credible Set | purple |
| chr19:21852273 | 19  | 21.85227 | 0.009546923 | Credible Set | purple |
| chr19:21852296 | 19  | 21.85230 | 0.006664577 | Credible Set | purple |
| chr19:21857059 | 19  | 21.85706 | 0.010695036 | Credible Set | purple |
| chr19:21857128 | 19  | 21.85713 | 0.010316721 | Credible Set | purple |
| chr19:21857704 | 19  | 21.85770 | 0.013519818 | Credible Set | purple |
| chr19:21857707 | 19  | 21.85771 | 0.012844288 | Credible Set | purple |
| chr19:21880097 | 19  | 21.88010 | 0.013786204 | Credible Set | purple |
| chr19:21889764 | 19  | 21.88976 | 0.012094988 | Credible Set | purple |
| chr19:21889768 | 19  | 21.88977 | 0.012127490 | Credible Set | purple |
| chr19:21889777 | 19  | 21.88978 | 0.012094988 | Credible Set | purple |
| chr19:21889831 | 19  | 21.88983 | 0.012121119 | Credible Set | purple |
| chr19:21889832 | 19  | 21.88983 | 0.012134329 | Credible Set | purple |
| chr19:21889838 | 19  | 21.88984 | 0.012277854 | Credible Set | purple |
| chr19:21895163 | 19  | 21.89516 | 0.023993456 | Credible Set | purple |
| chr19:21895174 | 19  | 21.89517 | 0.045457301 | Credible Set | purple |
| chr19:22070939 | 19  | 22.07094 | 0.004641355 | Credible Set | purple |
| chr19:22073618 | 19  | 22.07362 | 0.003737414 | Credible Set | purple |
| chr19:22113626 | 19  | 22.11363 | 0.004175365 | Credible Set | purple |
| chr19:22113628 | 19  | 22.11363 | 0.004116085 | Credible Set | purple |
| chr19:22113687 | 19  | 22.11369 | 0.004108361 | Credible Set | purple |

F34 GBS, routine WBC differential lymphocyte number

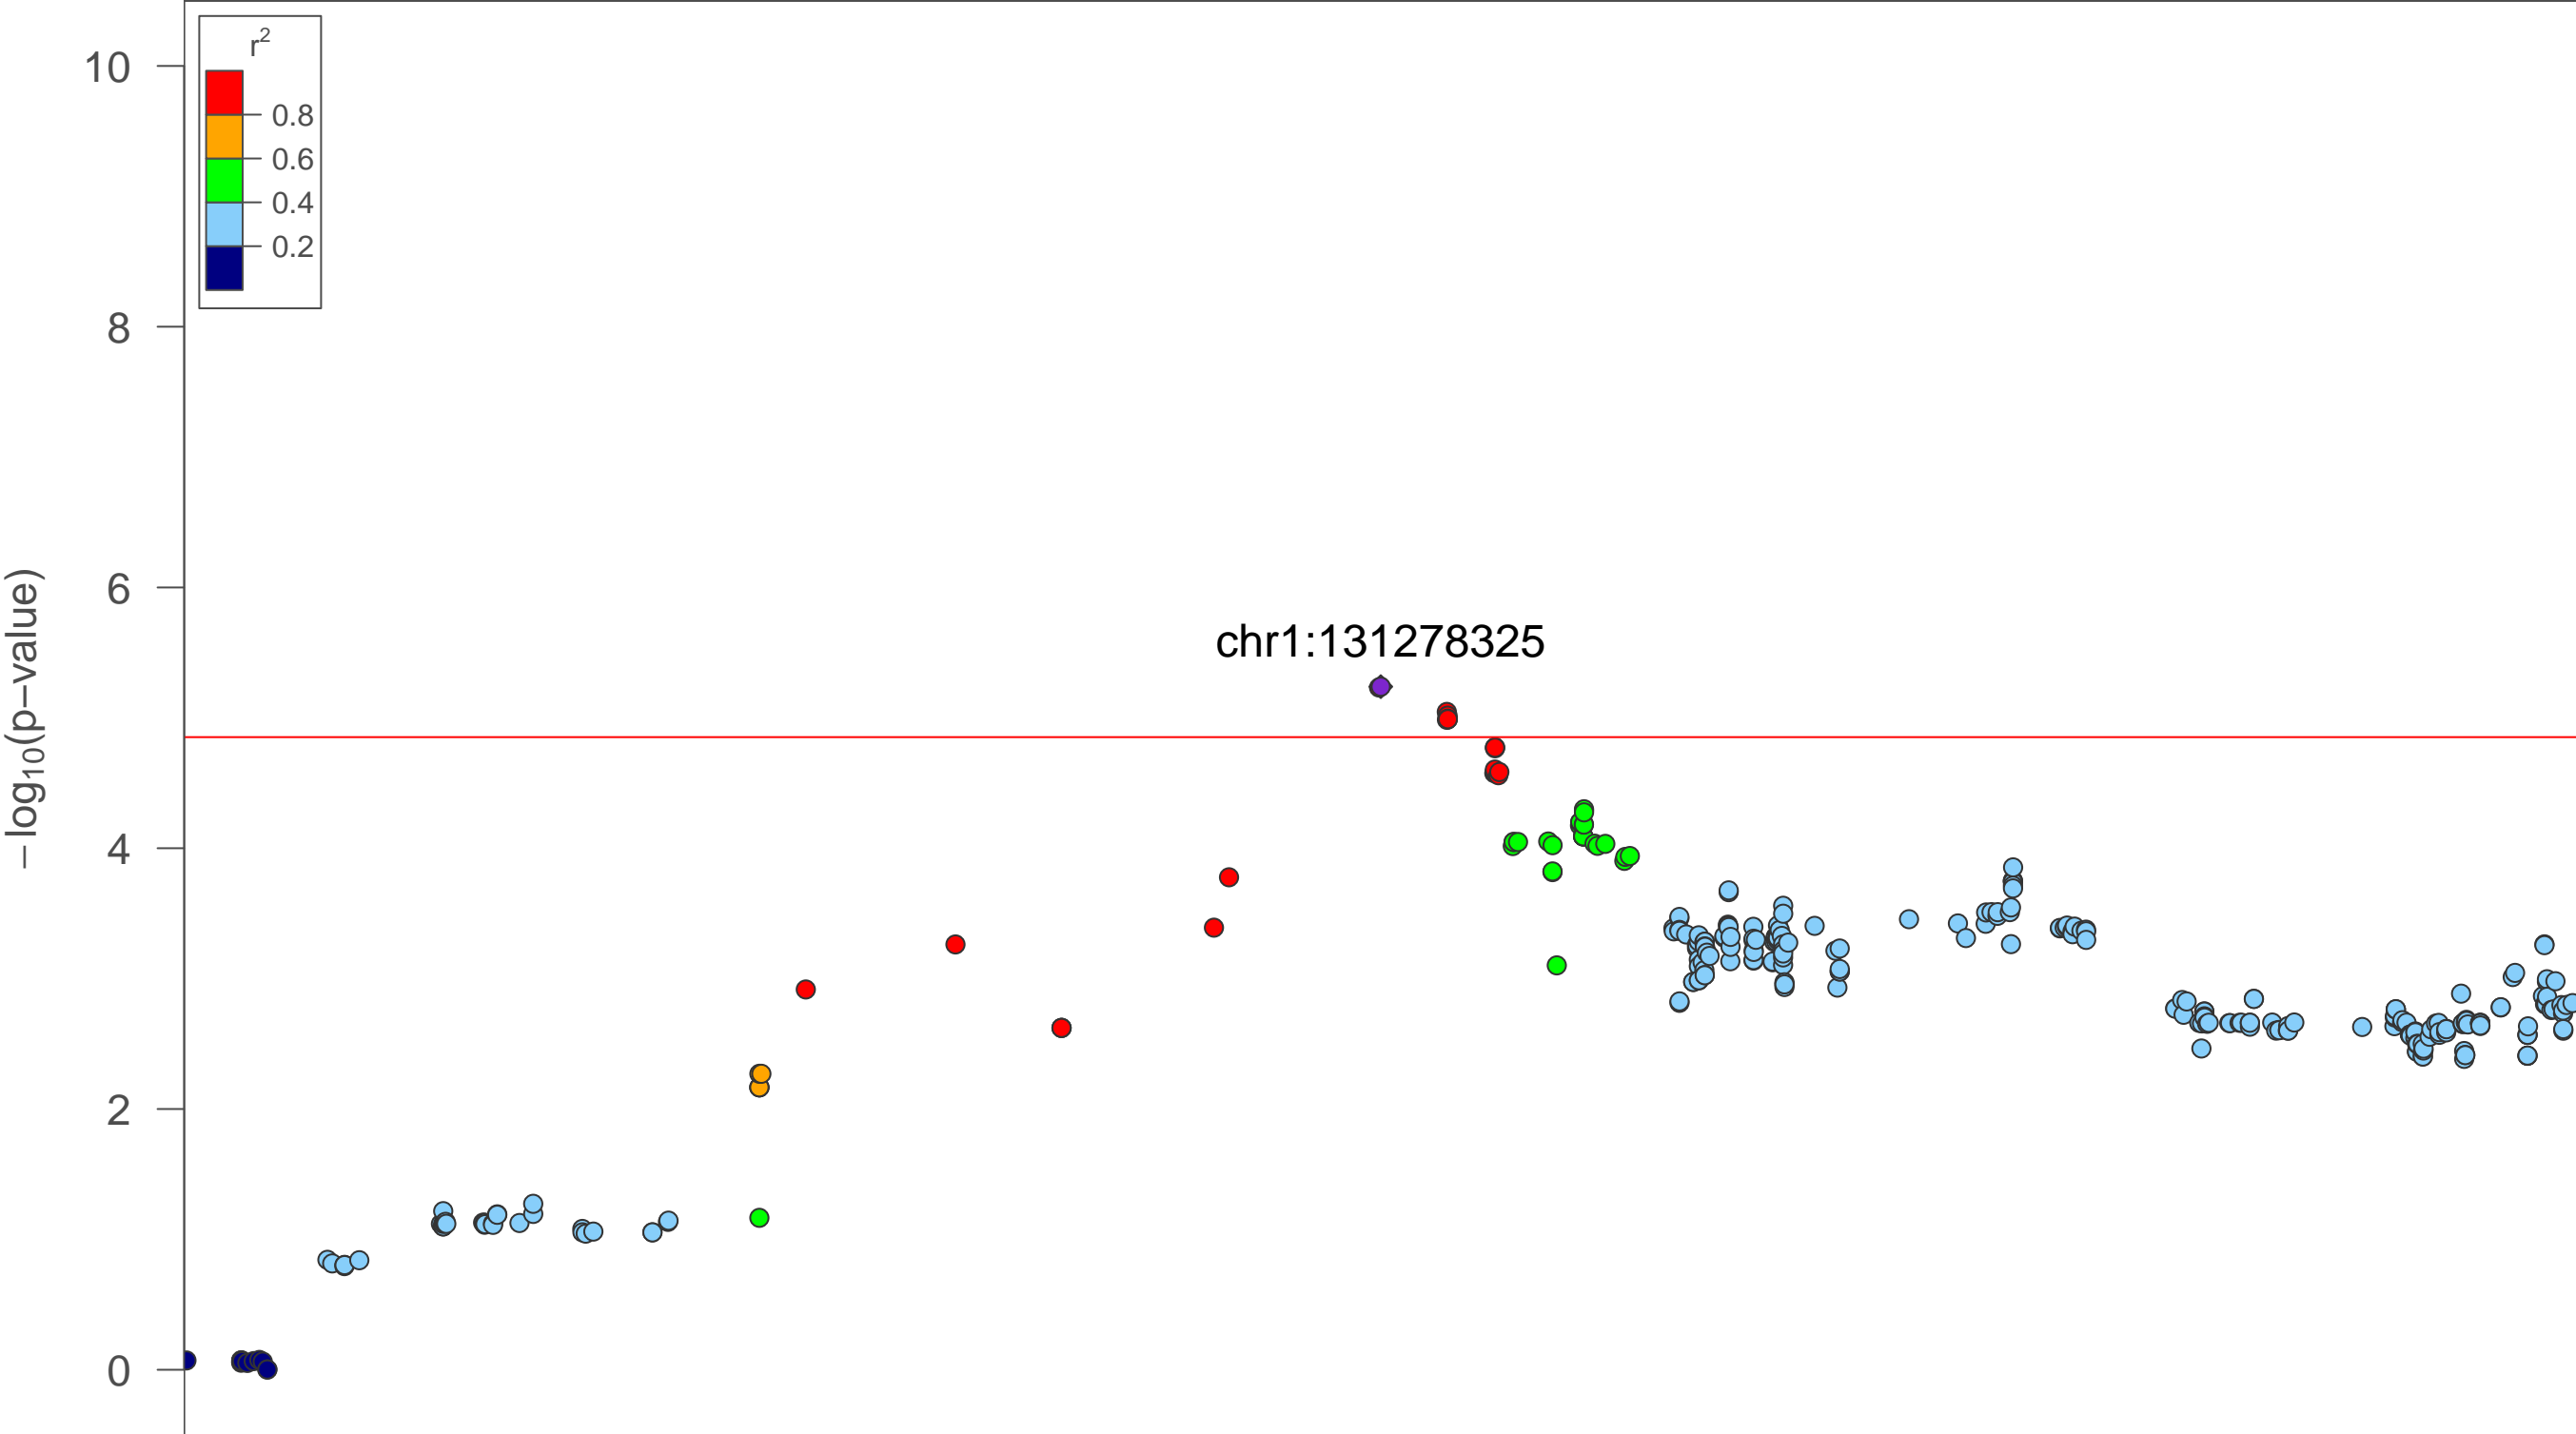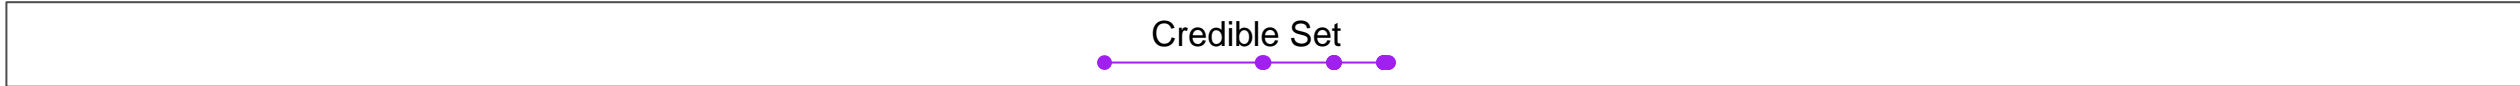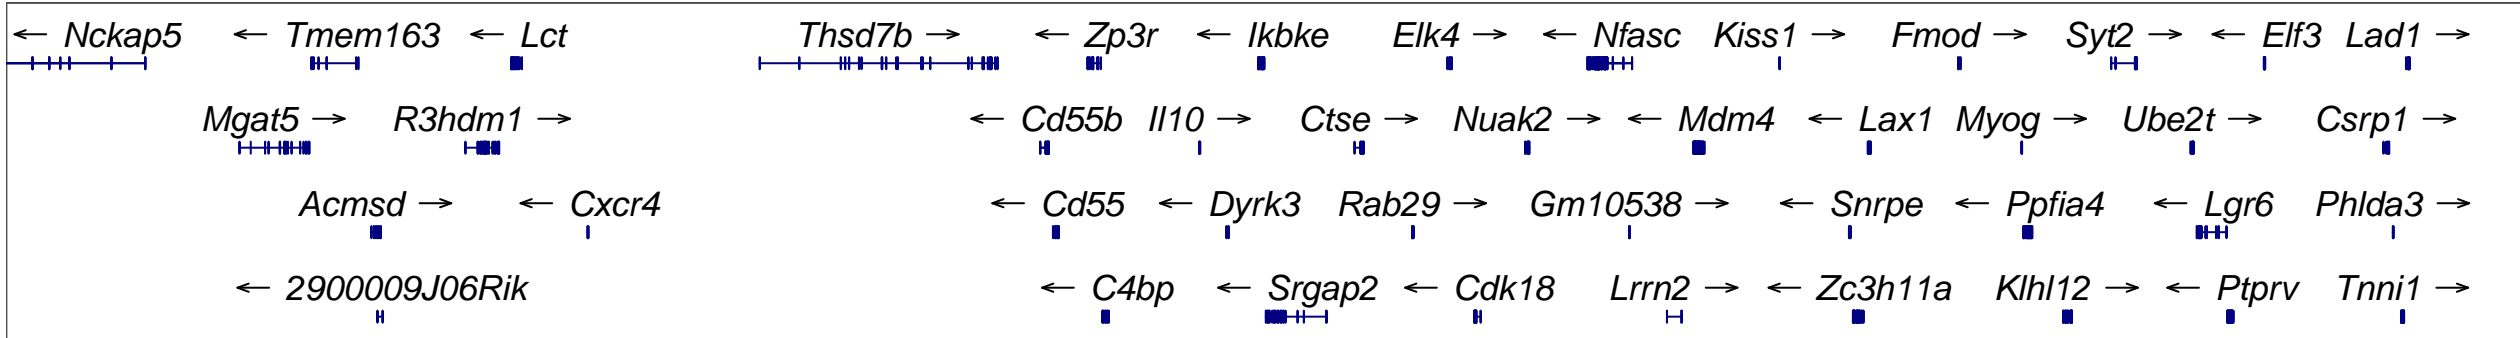

85 genes  
omitted

date: Thu Oct 25 17:02:15 2018  
build: F34GBS  
display range: chr1:126278325–136278325 [126278325–136278325]  
hilite range: 0 – 0 [ 0 – 0 ]  
reference SNP: chr1:131278325  
number of SNPs plotted: 331  
min P-value: 5.76E–6 [chr1:131278325]  
max P-value: 9.95E–1 [chr1:126626341]  
omitted Genes: Ccnt2, Map3k19, Rab3gap1  
omitted Genes: Zranb3, Mir128–1, Ubxn4  
omitted Genes: Mcm6, Dars, C4bp–ps1  
omitted Genes: Pfkfb2, Yod1, AA986860  
omitted Genes: Fcamr, Pigr, Fcmr  
omitted Genes: Il24, Il20, Il19  
omitted Genes: Mapkapk2, Eif2d, Rassf5  
omitted Genes: Fam72a, Avpr1b, Rab7b  
omitted Genes: Slc26a9, Pm20d1, Slc41a1  
omitted Genes: Nucks1, Slc45a3, Mfsd4a  
omitted Genes: Lemd1, Mir135b, Klhdc8a  
omitted Genes: Tmcc2, Dsty, Rbbp5  
omitted Genes: Tmem81, Cntn2, Pik3c2b  
omitted Genes: Ppp1r15b, Plekha6, Gm19461  
omitted Genes: Golt1a, Ren1, Etnk2  
omitted Genes: Sox13, Zbed6, Atp2b4  
omitted Genes: Mir6903, Optc, Prelp  
omitted Genes: Btg2, Chit1, Chil1  
omitted Genes: Mybph, Adora1, Tmem183a  
omitted Genes: 4933406M09Rik, Cyb5r1, Adipor1  
omitted Genes: Rabif, Mgat4e, Kdm5b  
omitted Genes: Ppp1r12b, Ptpn7, Arl8a  
omitted Genes: Gpr37l1, Rnpep, Timm17a  
omitted Genes: Lmod1, Shisa4, Ipo9  
omitted Genes: Nav1, Mir1231, Tnnt2  
omitted Genes: Pkp1, Igfn1, Tmem9  
omitted Genes: Ascl5, Cacna1s, Gm15850  
omitted Genes: Kif21b, 5730559C18Rik, Gpr25  
omitted Genes: Camsap2

Fine-mapping Regions

| snp            | chr | pos (Mb) | pp          | group        | color  |
|----------------|-----|----------|-------------|--------------|--------|
| chr1:130644276 | 1   | 130.6443 | 0.005171124 | Credible Set | purple |
| chr1:131271228 | 1   | 131.2712 | 0.124800595 | Credible Set | purple |
| chr1:131278325 | 1   | 131.2783 | 0.126561546 | Credible Set | purple |
| chr1:131554333 | 1   | 131.5543 | 0.082666046 | Credible Set | purple |
| chr1:131554917 | 1   | 131.5549 | 0.072325200 | Credible Set | purple |
| chr1:131557434 | 1   | 131.5574 | 0.077571556 | Credible Set | purple |
| chr1:131557903 | 1   | 131.5579 | 0.073665721 | Credible Set | purple |
| chr1:131558017 | 1   | 131.5580 | 0.072914337 | Credible Set | purple |
| chr1:131558379 | 1   | 131.5584 | 0.073069638 | Credible Set | purple |
| chr1:131752804 | 1   | 131.7528 | 0.029456788 | Credible Set | purple |
| chr1:131755038 | 1   | 131.7550 | 0.030210485 | Credible Set | purple |
| chr1:131755217 | 1   | 131.7552 | 0.031330051 | Credible Set | purple |
| chr1:131755634 | 1   | 131.7556 | 0.044790792 | Credible Set | purple |
| chr1:131755661 | 1   | 131.7557 | 0.045572795 | Credible Set | purple |
| chr1:131755687 | 1   | 131.7557 | 0.045290624 | Credible Set | purple |
| chr1:131769555 | 1   | 131.7696 | 0.028472515 | Credible Set | purple |
| chr1:131773688 | 1   | 131.7737 | 0.030055953 | Credible Set | purple |

F34 GBS, routine WBC differential lymphocyte number

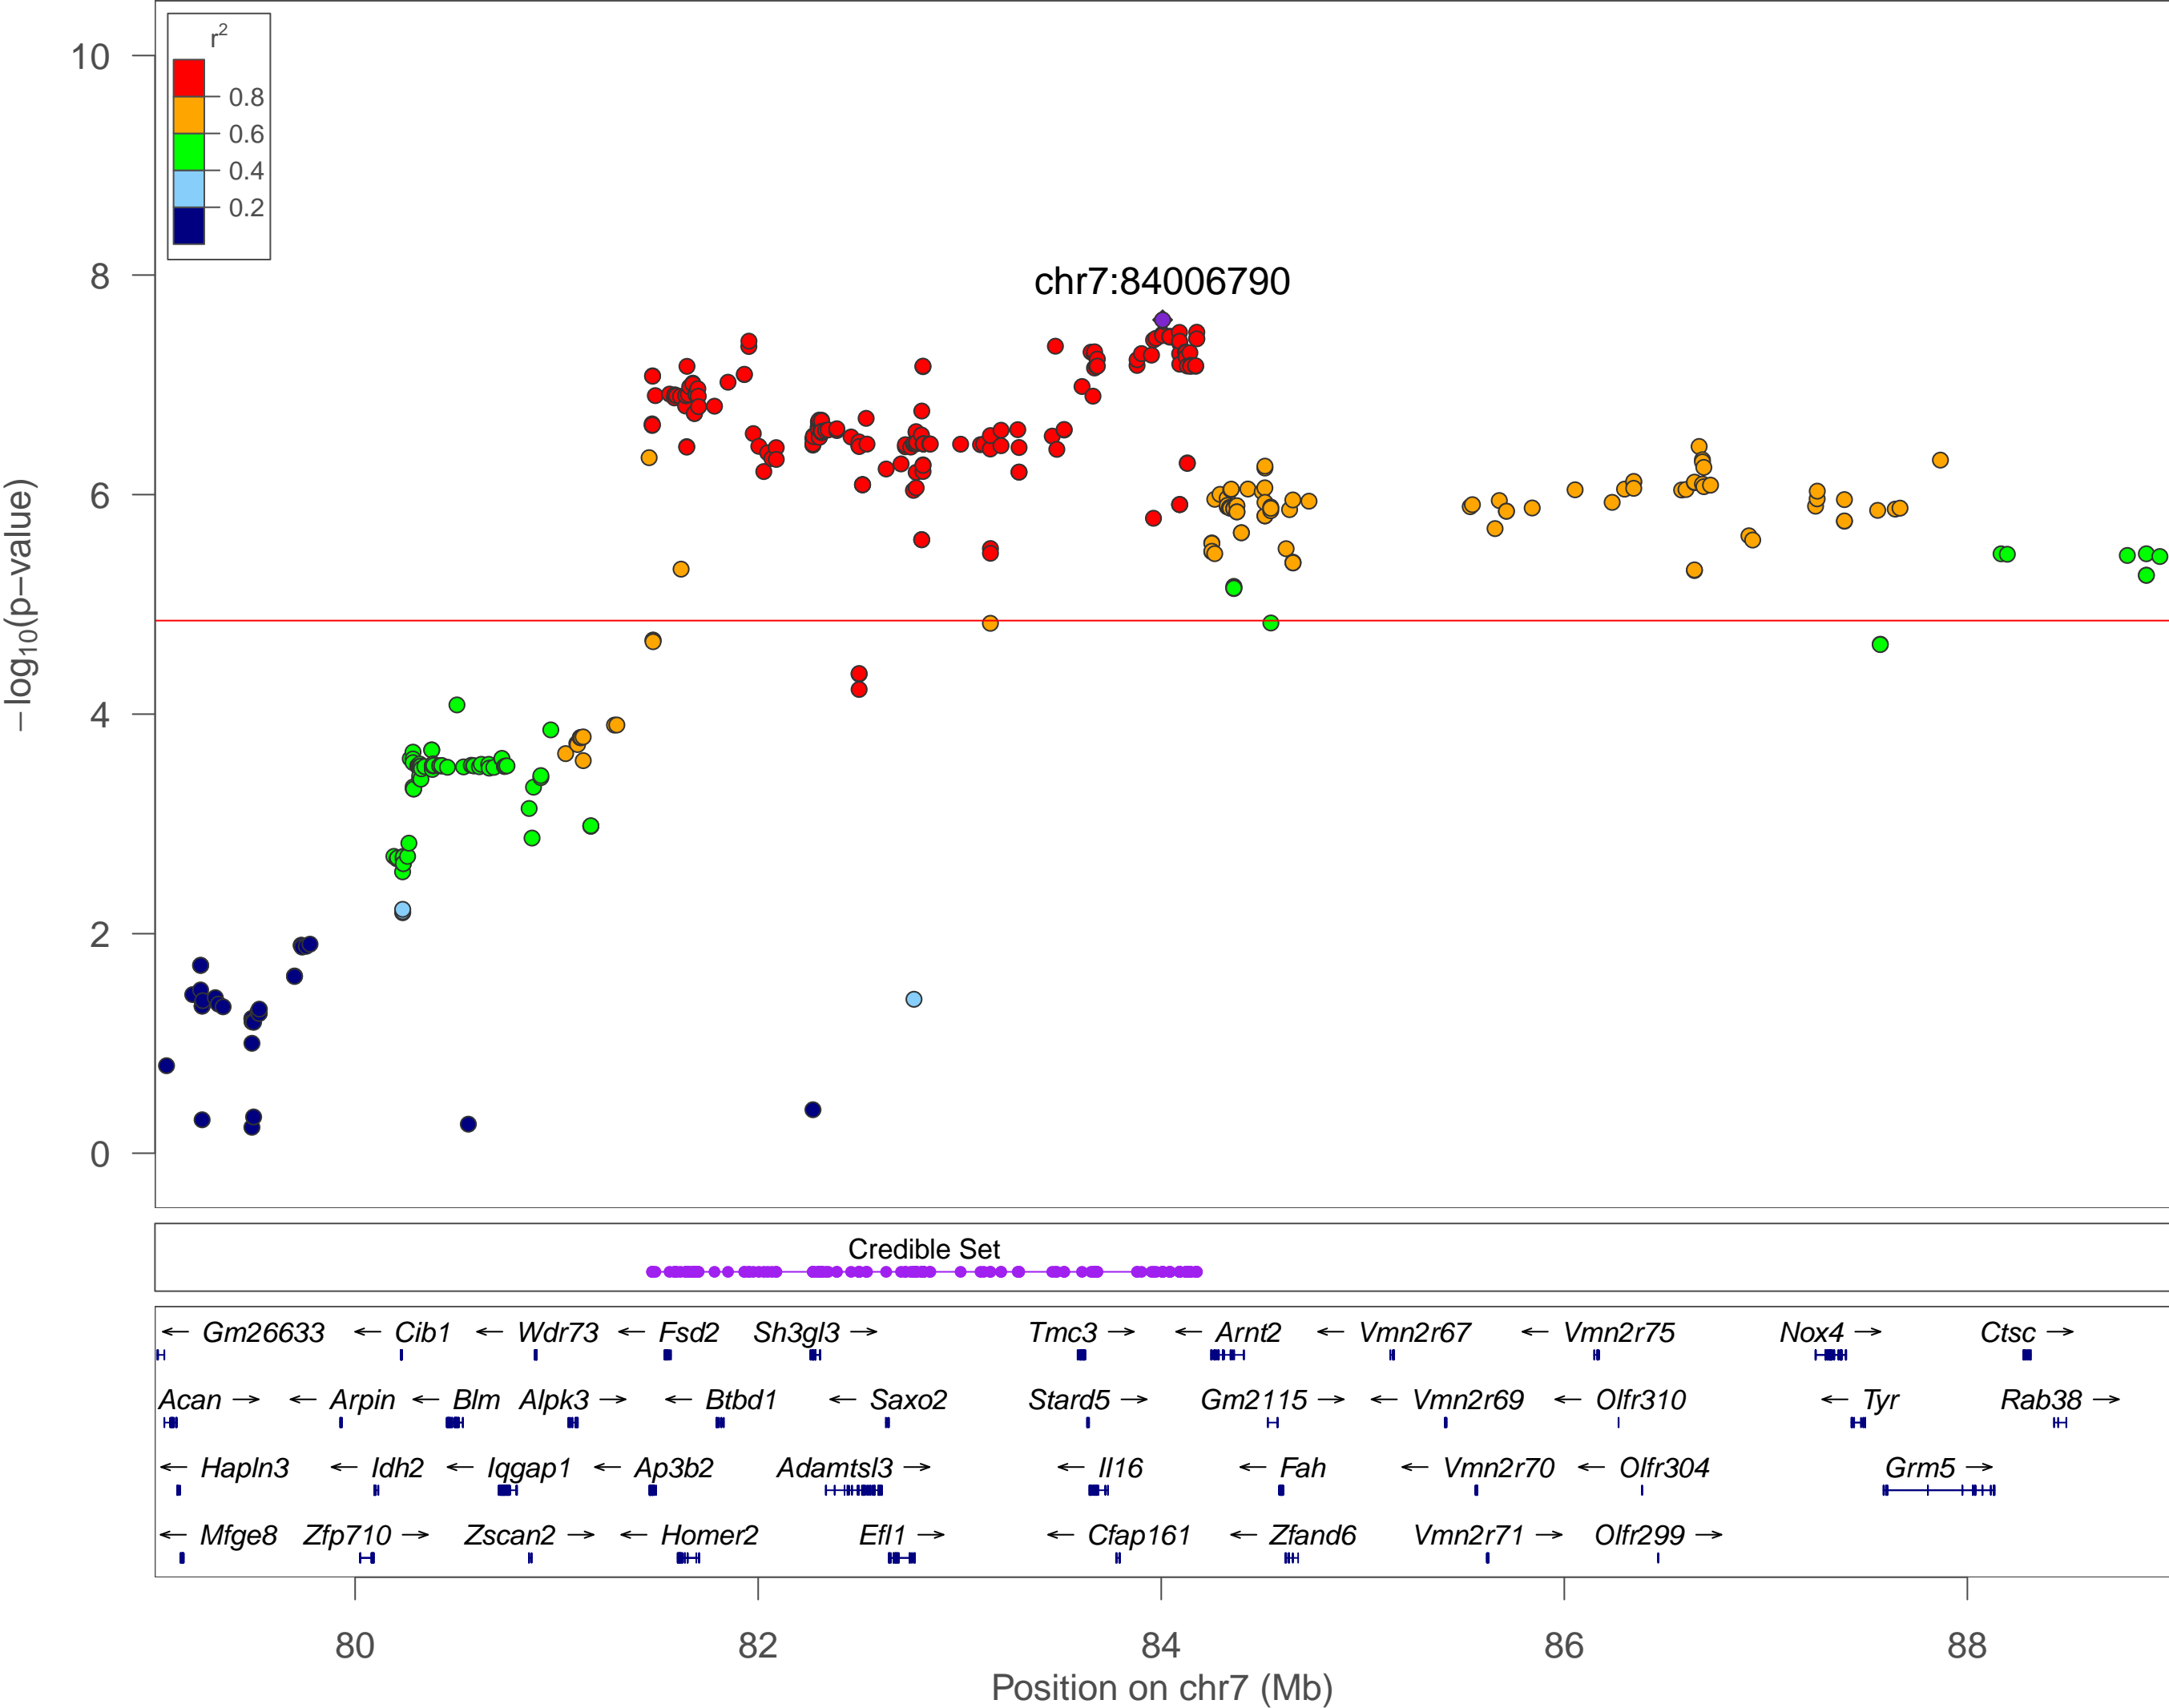



date: Thu Oct 25 17:02:46 2018  
build: F34GBS  
display range: chr7:79006790–89006790 [79006790–89006790]  
hilite range: 0 – 0 [ 0 – 0 ]  
reference SNP: chr7:84006790  
number of SNPs plotted: 397  
min P-value: 2.56E–8 [chr7:84006790]  
max P-value: 5.8E–1 [chr7:79487919]  
omitted Genes: Abhd2, Rlbp1, Fanci  
omitted Genes: Polg, Mir9–3hg, Mir9–3  
omitted Genes: Rhcg, Ticrr, Kif7  
omitted Genes: Plin1, Pex11a, Wdr93  
omitted Genes: Mesp1, Mesp2, Anpep  
omitted Genes: Ap3s2, Gm21057, Sema4b  
omitted Genes: Gdpgp1, Tll13, Ngrn  
omitted Genes: Vps33b, Prc1, Rccd1  
omitted Genes: Unc45a, Hddc3, Man2a2  
omitted Genes: Fes, Furin, Crtc3  
omitted Genes: Gm15880, Nmb, Sec11a  
omitted Genes: Zfp592, Slc28a1, Pde8a  
omitted Genes: Rps17, Cpeb1, BC048679  
omitted Genes: 2900076A07Rik, Mir1839, Whamm  
omitted Genes: Fam103a1, 3110040N11Rik, Tm6sf1  
omitted Genes: Hdgfrp3, Bnc1, Gm20744  
omitted Genes: 4933406J10Rik, Mex3b, 4933430H16Rik  
omitted Genes: Mesdc1, Mesdc2, Cemip  
omitted Genes: Abhd17c, 2610206C17Rik, Olfr291  
omitted Genes: Olfr290, Vmn2r65, Vmn2r66  
omitted Genes: Vmn2r68, Vmn2r72, Vmn2r73  
omitted Genes: Vmn2r74, Vmn2r76, Olfr309  
omitted Genes: Olfr308, Olfr307, Olfr305  
omitted Genes: Olfr303, Olfr301, Olfr298  
omitted Genes: Olfr297, Olfr295, Olfr294  
omitted Genes: Olfr293, Olfr292, Folh1  
omitted Genes: Vmn2r77, Vmn2r78, Vmn2r79

## Fine-mapping Regions

| snp           | chr | pos (Mb) | pp          | group        | color  |
|---------------|-----|----------|-------------|--------------|--------|
| chr7:81473821 | 7   | 81.47382 | 0.003026101 | Credible Set | purple |
| chr7:81473841 | 7   | 81.47384 | 0.003122681 | Credible Set | purple |
| chr7:81475123 | 7   | 81.47512 | 0.003052756 | Credible Set | purple |
| chr7:81475858 | 7   | 81.47586 | 0.008274026 | Credible Set | purple |
| chr7:81475869 | 7   | 81.47587 | 0.008217810 | Credible Set | purple |
| chr7:81489705 | 7   | 81.48971 | 0.005538830 | Credible Set | purple |
| chr7:81560306 | 7   | 81.56031 | 0.005716971 | Credible Set | purple |
| chr7:81584607 | 7   | 81.58461 | 0.005287670 | Credible Set | purple |
| chr7:81587028 | 7   | 81.58703 | 0.005626033 | Credible Set | purple |
| chr7:81587096 | 7   | 81.58710 | 0.005586258 | Credible Set | purple |
| chr7:81595380 | 7   | 81.59538 | 0.005512988 | Credible Set | purple |
| chr7:81614445 | 7   | 81.61445 | 0.005449247 | Credible Set | purple |
| chr7:81639723 | 7   | 81.63972 | 0.004486953 | Credible Set | purple |
| chr7:81641021 | 7   | 81.64102 | 0.005527387 | Credible Set | purple |
| chr7:81641166 | 7   | 81.64117 | 0.005560081 | Credible Set | purple |
| chr7:81645454 | 7   | 81.64545 | 0.001969161 | Credible Set | purple |
| chr7:81645464 | 7   | 81.64546 | 0.001950338 | Credible Set | purple |
| chr7:81646679 | 7   | 81.64668 | 0.010038701 | Credible Set | purple |
| chr7:81653902 | 7   | 81.65390 | 0.005661306 | Credible Set | purple |
| chr7:81660191 | 7   | 81.66019 | 0.006627368 | Credible Set | purple |
| chr7:81675727 | 7   | 81.67573 | 0.007133144 | Credible Set | purple |
| chr7:81675758 | 7   | 81.67576 | 0.007000544 | Credible Set | purple |
| chr7:81683805 | 7   | 81.68381 | 0.003858310 | Credible Set | purple |
| chr7:81683816 | 7   | 81.68382 | 0.003852926 | Credible Set | purple |
| chr7:81691936 | 7   | 81.69194 | 0.005884701 | Credible Set | purple |
| chr7:81691946 | 7   | 81.69195 | 0.005610961 | Credible Set | purple |
| chr7:81700477 | 7   | 81.70048 | 0.006368899 | Credible Set | purple |
| chr7:81702582 | 7   | 81.70258 | 0.005470962 | Credible Set | purple |
| chr7:81704380 | 7   | 81.70438 | 0.004426288 | Credible Set | purple |
| chr7:81783181 | 7   | 81.78318 | 0.004471243 | Credible Set | purple |
| chr7:81850247 | 7   | 81.85025 | 0.007272302 | Credible Set | purple |
| chr7:81931360 | 7   | 81.93136 | 0.008491558 | Credible Set | purple |
| chr7:81931538 | 7   | 81.93154 | 0.008543284 | Credible Set | purple |
| chr7:81953706 | 7   | 81.95371 | 0.015024622 | Credible Set | purple |
| chr7:81954104 | 7   | 81.95410 | 0.016755415 | Credible Set | purple |
| chr7:81975588 | 7   | 81.97559 | 0.002564800 | Credible Set | purple |

## Fine-mapping Regions

| snp           | chr | pos (Mb) | pp          | group        | color  |
|---------------|-----|----------|-------------|--------------|--------|
| chr7:82003279 | 7   | 82.00328 | 0.001981678 | Credible Set | purple |
| chr7:82027931 | 7   | 82.02793 | 0.001189539 | Credible Set | purple |
| chr7:82047190 | 7   | 82.04719 | 0.001740457 | Credible Set | purple |
| chr7:82068213 | 7   | 82.06821 | 0.001548150 | Credible Set | purple |
| chr7:82089480 | 7   | 82.08948 | 0.001930510 | Credible Set | purple |
| chr7:82089724 | 7   | 82.08972 | 0.001520962 | Credible Set | purple |
| chr7:82271335 | 7   | 82.27133 | 0.002321685 | Credible Set | purple |
| chr7:82271484 | 7   | 82.27148 | 0.002030760 | Credible Set | purple |
| chr7:82271646 | 7   | 82.27165 | 0.002074878 | Credible Set | purple |
| chr7:82271673 | 7   | 82.27167 | 0.002076964 | Credible Set | purple |
| chr7:82274291 | 7   | 82.27429 | 0.002450207 | Credible Set | purple |
| chr7:82274554 | 7   | 82.27455 | 0.002412916 | Credible Set | purple |
| chr7:82297457 | 7   | 82.29746 | 0.002914205 | Credible Set | purple |
| chr7:82299107 | 7   | 82.29911 | 0.003198637 | Credible Set | purple |
| chr7:82299132 | 7   | 82.29913 | 0.003278590 | Credible Set | purple |
| chr7:82299530 | 7   | 82.29953 | 0.002786006 | Credible Set | purple |
| chr7:82303408 | 7   | 82.30341 | 0.003303529 | Credible Set | purple |
| chr7:82303412 | 7   | 82.30341 | 0.003374319 | Credible Set | purple |
| chr7:82303615 | 7   | 82.30361 | 0.002392926 | Credible Set | purple |
| chr7:82303634 | 7   | 82.30363 | 0.002376889 | Credible Set | purple |
| chr7:82313033 | 7   | 82.31303 | 0.002812280 | Credible Set | purple |
| chr7:82313147 | 7   | 82.31315 | 0.002999856 | Credible Set | purple |
| chr7:82313292 | 7   | 82.31329 | 0.002812280 | Credible Set | purple |
| chr7:82313462 | 7   | 82.31346 | 0.002829550 | Credible Set | purple |
| chr7:82314291 | 7   | 82.31429 | 0.003366730 | Credible Set | purple |
| chr7:82314356 | 7   | 82.31436 | 0.003320052 | Credible Set | purple |
| chr7:82314779 | 7   | 82.31478 | 0.002616731 | Credible Set | purple |
| chr7:82314816 | 7   | 82.31482 | 0.002683564 | Credible Set | purple |
| chr7:82335262 | 7   | 82.33526 | 0.002733645 | Credible Set | purple |
| chr7:82347625 | 7   | 82.34762 | 0.002764231 | Credible Set | purple |
| chr7:82390271 | 7   | 82.39027 | 0.002728454 | Credible Set | purple |
| chr7:82390280 | 7   | 82.39028 | 0.002829724 | Credible Set | purple |
| chr7:82460970 | 7   | 82.46097 | 0.002394497 | Credible Set | purple |
| chr7:82500110 | 7   | 82.50011 | 0.002010226 | Credible Set | purple |
| chr7:82500157 | 7   | 82.50016 | 0.001994627 | Credible Set | purple |
| chr7:82500479 | 7   | 82.50048 | 0.002167026 | Credible Set | purple |

## Fine-mapping Regions

| snp           | chr | pos (Mb) | pp          | group        | color  |
|---------------|-----|----------|-------------|--------------|--------|
| chr7:82501151 | 7   | 82.50115 | 0.001973573 | Credible Set | purple |
| chr7:82535591 | 7   | 82.53559 | 0.003493037 | Credible Set | purple |
| chr7:82539877 | 7   | 82.53988 | 0.002072976 | Credible Set | purple |
| chr7:82635047 | 7   | 82.63505 | 0.001252680 | Credible Set | purple |
| chr7:82708811 | 7   | 82.70881 | 0.001388179 | Credible Set | purple |
| chr7:82730396 | 7   | 82.73040 | 0.001964861 | Credible Set | purple |
| chr7:82730540 | 7   | 82.73054 | 0.002049199 | Credible Set | purple |
| chr7:82756984 | 7   | 82.75698 | 0.001951843 | Credible Set | purple |
| chr7:82770538 | 7   | 82.77054 | 0.002082988 | Credible Set | purple |
| chr7:82773085 | 7   | 82.77308 | 0.002101881 | Credible Set | purple |
| chr7:82782979 | 7   | 82.78298 | 0.002082988 | Credible Set | purple |
| chr7:82783483 | 7   | 82.78348 | 0.002626973 | Credible Set | purple |
| chr7:82783548 | 7   | 82.78355 | 0.002667989 | Credible Set | purple |
| chr7:82787558 | 7   | 82.78756 | 0.002145889 | Credible Set | purple |
| chr7:82810186 | 7   | 82.81019 | 0.002491472 | Credible Set | purple |
| chr7:82811761 | 7   | 82.81176 | 0.004050773 | Credible Set | purple |
| chr7:82817547 | 7   | 82.81755 | 0.009973121 | Credible Set | purple |
| chr7:82817550 | 7   | 82.81755 | 0.010080208 | Credible Set | purple |
| chr7:82817963 | 7   | 82.81796 | 0.001361527 | Credible Set | purple |
| chr7:82817972 | 7   | 82.81797 | 0.001191165 | Credible Set | purple |
| chr7:82817975 | 7   | 82.81798 | 0.001348065 | Credible Set | purple |
| chr7:82818115 | 7   | 82.81812 | 0.002079740 | Credible Set | purple |
| chr7:82820779 | 7   | 82.82078 | 0.002082988 | Credible Set | purple |
| chr7:82820783 | 7   | 82.82078 | 0.002082988 | Credible Set | purple |
| chr7:82820806 | 7   | 82.82081 | 0.002082988 | Credible Set | purple |
| chr7:82850796 | 7   | 82.85080 | 0.002082988 | Credible Set | purple |
| chr7:82854160 | 7   | 82.85416 | 0.002073230 | Credible Set | purple |
| chr7:83004458 | 7   | 83.00446 | 0.002069762 | Credible Set | purple |
| chr7:83103367 | 7   | 83.10337 | 0.002049895 | Credible Set | purple |
| chr7:83118843 | 7   | 83.11884 | 0.002069472 | Credible Set | purple |
| chr7:83151951 | 7   | 83.15195 | 0.001876320 | Credible Set | purple |
| chr7:83152293 | 7   | 83.15229 | 0.002464111 | Credible Set | purple |
| chr7:83204993 | 7   | 83.20499 | 0.002006845 | Credible Set | purple |
| chr7:83205102 | 7   | 83.20510 | 0.002745910 | Credible Set | purple |
| chr7:83288039 | 7   | 83.28804 | 0.002776773 | Credible Set | purple |
| chr7:83294270 | 7   | 83.29427 | 0.001176128 | Credible Set | purple |

## Fine-mapping Regions

| snp           | chr | pos (Mb) | pp          | group        | color  |
|---------------|-----|----------|-------------|--------------|--------|
| chr7:83294302 | 7   | 83.29430 | 0.001176128 | Credible Set | purple |
| chr7:83294391 | 7   | 83.29439 | 0.001934993 | Credible Set | purple |
| chr7:83459164 | 7   | 83.45916 | 0.002437130 | Credible Set | purple |
| chr7:83474799 | 7   | 83.47480 | 0.015115469 | Credible Set | purple |
| chr7:83481871 | 7   | 83.48187 | 0.001864795 | Credible Set | purple |
| chr7:83518242 | 7   | 83.51824 | 0.002756305 | Credible Set | purple |
| chr7:83518263 | 7   | 83.51826 | 0.002787826 | Credible Set | purple |
| chr7:83606909 | 7   | 83.60691 | 0.006664566 | Credible Set | purple |
| chr7:83651842 | 7   | 83.65184 | 0.013406210 | Credible Set | purple |
| chr7:83661158 | 7   | 83.66116 | 0.005479029 | Credible Set | purple |
| chr7:83668857 | 7   | 83.66886 | 0.012777413 | Credible Set | purple |
| chr7:83668910 | 7   | 83.66891 | 0.009708079 | Credible Set | purple |
| chr7:83669157 | 7   | 83.66916 | 0.013482005 | Credible Set | purple |
| chr7:83677943 | 7   | 83.67794 | 0.010030132 | Credible Set | purple |
| chr7:83677967 | 7   | 83.67797 | 0.010198684 | Credible Set | purple |
| chr7:83682817 | 7   | 83.68282 | 0.011631887 | Credible Set | purple |
| chr7:83682921 | 7   | 83.68292 | 0.010079954 | Credible Set | purple |
| chr7:83879999 | 7   | 83.88000 | 0.010229013 | Credible Set | purple |
| chr7:83880145 | 7   | 83.88014 | 0.011484956 | Credible Set | purple |
| chr7:83901893 | 7   | 83.90189 | 0.013011030 | Credible Set | purple |
| chr7:83951649 | 7   | 83.95165 | 0.012608519 | Credible Set | purple |
| chr7:83961926 | 7   | 83.96193 | 0.017167467 | Credible Set | purple |
| chr7:83974098 | 7   | 83.97410 | 0.017752599 | Credible Set | purple |
| chr7:84006464 | 7   | 84.00646 | 0.019292341 | Credible Set | purple |
| chr7:84006790 | 7   | 84.00679 | 0.025817660 | Credible Set | purple |
| chr7:84006899 | 7   | 84.00690 | 0.019285117 | Credible Set | purple |
| chr7:84007186 | 7   | 84.00719 | 0.018768817 | Credible Set | purple |
| chr7:84042795 | 7   | 84.04279 | 0.018504064 | Credible Set | purple |
| chr7:84042808 | 7   | 84.04281 | 0.018167839 | Credible Set | purple |
| chr7:84043291 | 7   | 84.04329 | 0.018286351 | Credible Set | purple |
| chr7:84090415 | 7   | 84.09041 | 0.020030694 | Credible Set | purple |
| chr7:84091016 | 7   | 84.09102 | 0.016138703 | Credible Set | purple |
| chr7:84091395 | 7   | 84.09140 | 0.012946410 | Credible Set | purple |
| chr7:84091408 | 7   | 84.09141 | 0.016709005 | Credible Set | purple |
| chr7:84091894 | 7   | 84.09189 | 0.010483652 | Credible Set | purple |
| chr7:84119855 | 7   | 84.11986 | 0.013429388 | Credible Set | purple |

Fine-mapping Regions

| snp           | chr | pos (Mb) | pp          | group        | color  |
|---------------|-----|----------|-------------|--------------|--------|
| chr7:84124190 | 7   | 84.12419 | 0.013337639 | Credible Set | purple |
| chr7:84124515 | 7   | 84.12452 | 0.012123053 | Credible Set | purple |
| chr7:84129412 | 7   | 84.12941 | 0.001416950 | Credible Set | purple |
| chr7:84129418 | 7   | 84.12942 | 0.001402105 | Credible Set | purple |
| chr7:84129648 | 7   | 84.12965 | 0.010095752 | Credible Set | purple |
| chr7:84142029 | 7   | 84.14203 | 0.013222649 | Credible Set | purple |
| chr7:84146037 | 7   | 84.14604 | 0.010252076 | Credible Set | purple |
| chr7:84146051 | 7   | 84.14605 | 0.010032074 | Credible Set | purple |
| chr7:84170763 | 7   | 84.17076 | 0.010055338 | Credible Set | purple |
| chr7:84170827 | 7   | 84.17083 | 0.010151340 | Credible Set | purple |
| chr7:84175856 | 7   | 84.17586 | 0.017693356 | Credible Set | purple |
| chr7:84176468 | 7   | 84.17647 | 0.020084459 | Credible Set | purple |
| chr7:84176482 | 7   | 84.17648 | 0.017566262 | Credible Set | purple |

F34 GBS, routine WBC differential lymphocyte number

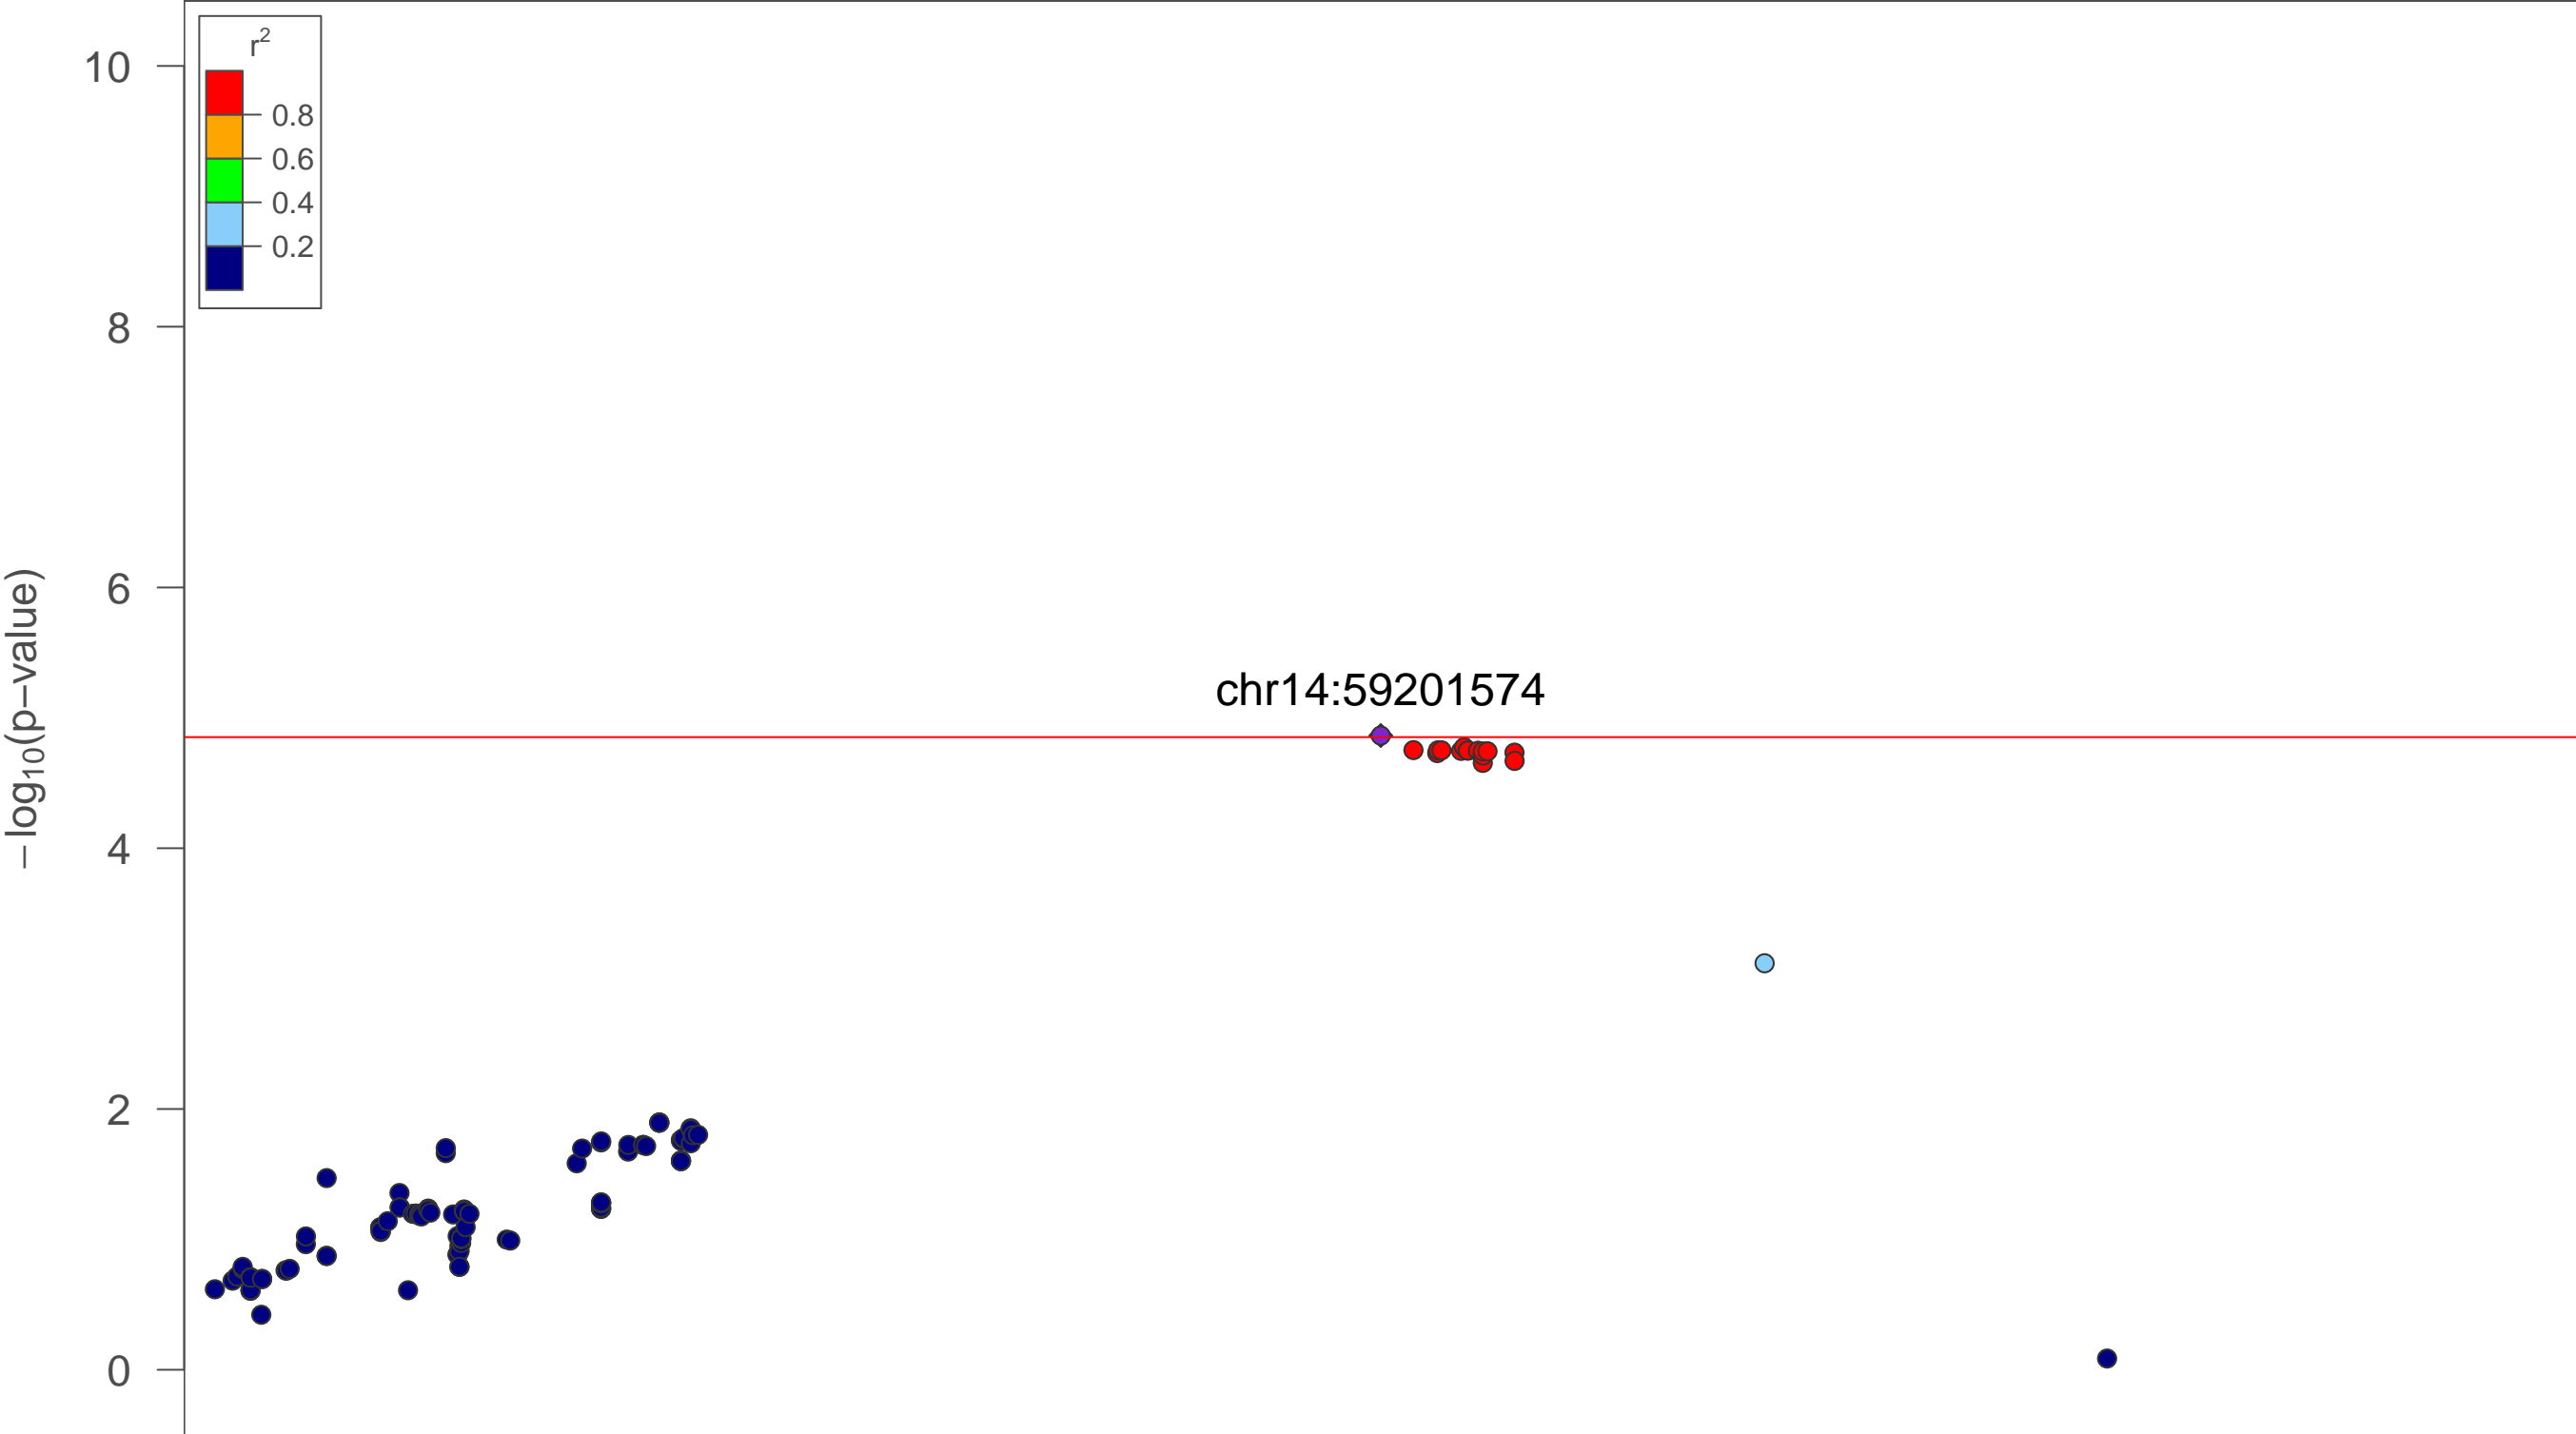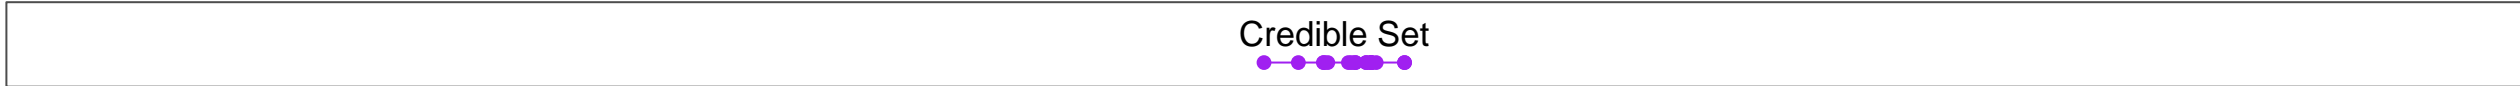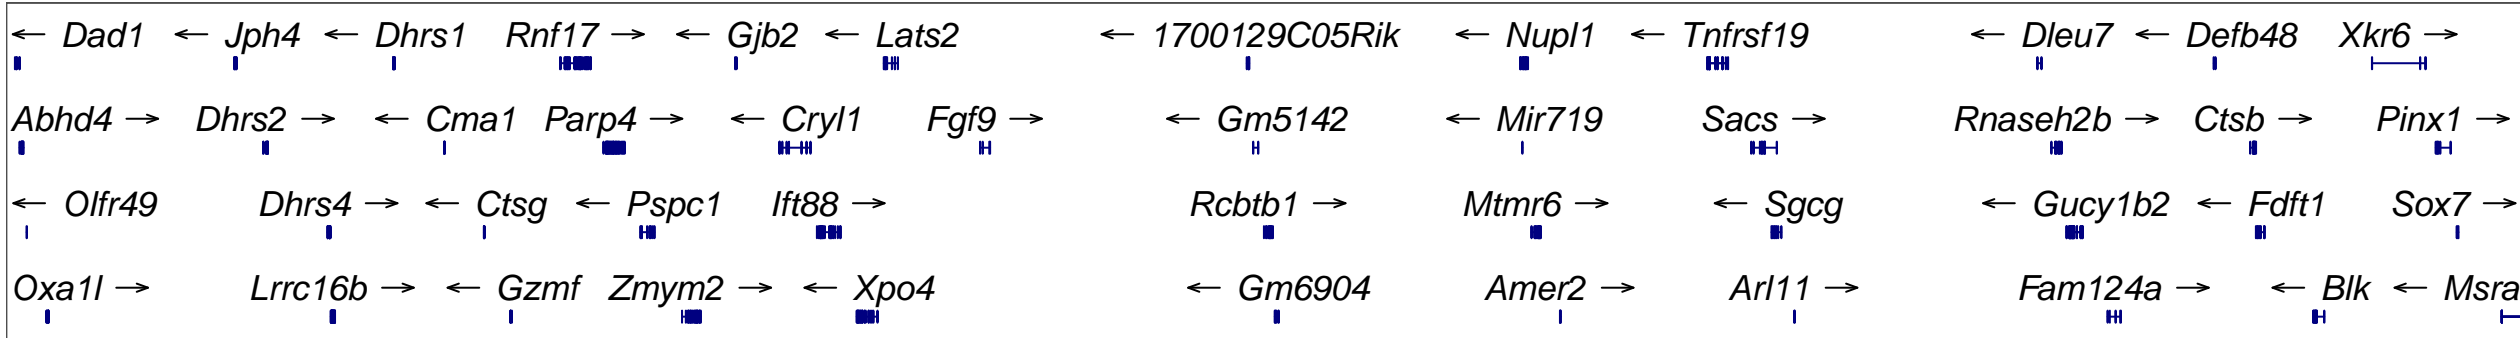

146 genes  
omitted

Position on chr14 (Mb)

date: Thu Oct 25 17:02:27 2018

build: F34GBS

display range: chr14:54201574–64201574 [54201574–64201574]

hilite range: 0 – 0 [ 0 – 0 ]

reference SNP: chr14:59201574

number of SNPs plotted: 118

min P-value: 1.37E–5 [chr14:59201574]

max P-value: 8.19E–1 [chr14:62236131]

omitted Genes: Slc7a7, Mrpl52, Mmp14

omitted Genes: Lrp10, Rem2, Prmt5

omitted Genes: Haus4, Ajuba, 4931414P19Rik

omitted Genes: Psmb5, Mir686, Psmb11

omitted Genes: Cdh24, Acin1, Mir6948

omitted Genes: 4930579G18Rik, 1700123O20Rik, Cebpe

omitted Genes: Slc7a8, Homez, Ppp1r3e

omitted Genes: Bcl2l2, Pabpn1, Slc22a17

omitted Genes: Efs, Il25, Cmtm5

omitted Genes: Myh6, Mir208a, Mhrt

omitted Genes: Myh7, Mir208b, Ngdn

omitted Genes: Gm10364, Zfhx2, Zfhx2os

omitted Genes: Thtpa, Ap1g2, Cpne6

omitted Genes: Nrl, Pck2, Dcaf11

omitted Genes: Fitm1, Psme1, Emc9

omitted Genes: Psme2, Rnf31, Irf9

omitted Genes: Rec8, Ipo4, Tm9sf1

omitted Genes: Tssk4, Mdp1, Nedd8

omitted Genes: Gmpr2, Tinf2, Tgm1

omitted Genes: Rabggta, Nop9, Cideb

omitted Genes: Ltb4r2, Ltb4r1, Adcy4

omitted Genes: Ripk3, Nfatc4, Nynrin

omitted Genes: Cbln3, Khnyn, Sdr39u1

omitted Genes: Mcpt-ps1, Cma2, Gm5801

omitted Genes: Mcpt1, Mcpt9, Mcpt2

omitted Genes: Mcpt4, Mcpt8, Mir6949

omitted Genes: Gzme, Gzmd, Gzmg

omitted Genes: Gzmn, Gzmc, Gzmb

omitted Genes: Atp12a, Cenpj, Mphosph8

omitted Genes: Gm16973, Zmym5, B020004C17Rik

omitted Genes: Gja3, Gjb6, Il17d  
Make more plots at <http://csg.sph.umich.edu/locuszoom/>

omitted Genes: Ecf1akmt1, Ssn18, Mir3077



Fine-mapping Regions

| snp            | chr | pos (Mb) | pp         | group        | color  |
|----------------|-----|----------|------------|--------------|--------|
| chr14:59201574 | 14  | 59.20157 | 0.07261897 | Credible Set | purple |
| chr14:59338108 | 14  | 59.33811 | 0.05689636 | Credible Set | purple |
| chr14:59437591 | 14  | 59.43759 | 0.05409787 | Credible Set | purple |
| chr14:59440712 | 14  | 59.44071 | 0.05670075 | Credible Set | purple |
| chr14:59455253 | 14  | 59.45525 | 0.05663948 | Credible Set | purple |
| chr14:59537225 | 14  | 59.53722 | 0.05615352 | Credible Set | purple |
| chr14:59549690 | 14  | 59.54969 | 0.05971186 | Credible Set | purple |
| chr14:59564460 | 14  | 59.56446 | 0.05645541 | Credible Set | purple |
| chr14:59565568 | 14  | 59.56557 | 0.05645541 | Credible Set | purple |
| chr14:59608014 | 14  | 59.60801 | 0.05611562 | Credible Set | purple |
| chr14:59608030 | 14  | 59.60803 | 0.05611562 | Credible Set | purple |
| chr14:59625852 | 14  | 59.62585 | 0.05098621 | Credible Set | purple |
| chr14:59627887 | 14  | 59.62789 | 0.04583768 | Credible Set | purple |
| chr14:59628306 | 14  | 59.62831 | 0.05192754 | Credible Set | purple |
| chr14:59628310 | 14  | 59.62831 | 0.05563060 | Credible Set | purple |
| chr14:59647532 | 14  | 59.64753 | 0.05574007 | Credible Set | purple |
| chr14:59760158 | 14  | 59.76016 | 0.05448814 | Credible Set | purple |
| chr14:59760629 | 14  | 59.76063 | 0.04742890 | Credible Set | purple |

F34 GBS, routine WBC differential lymphocyte number

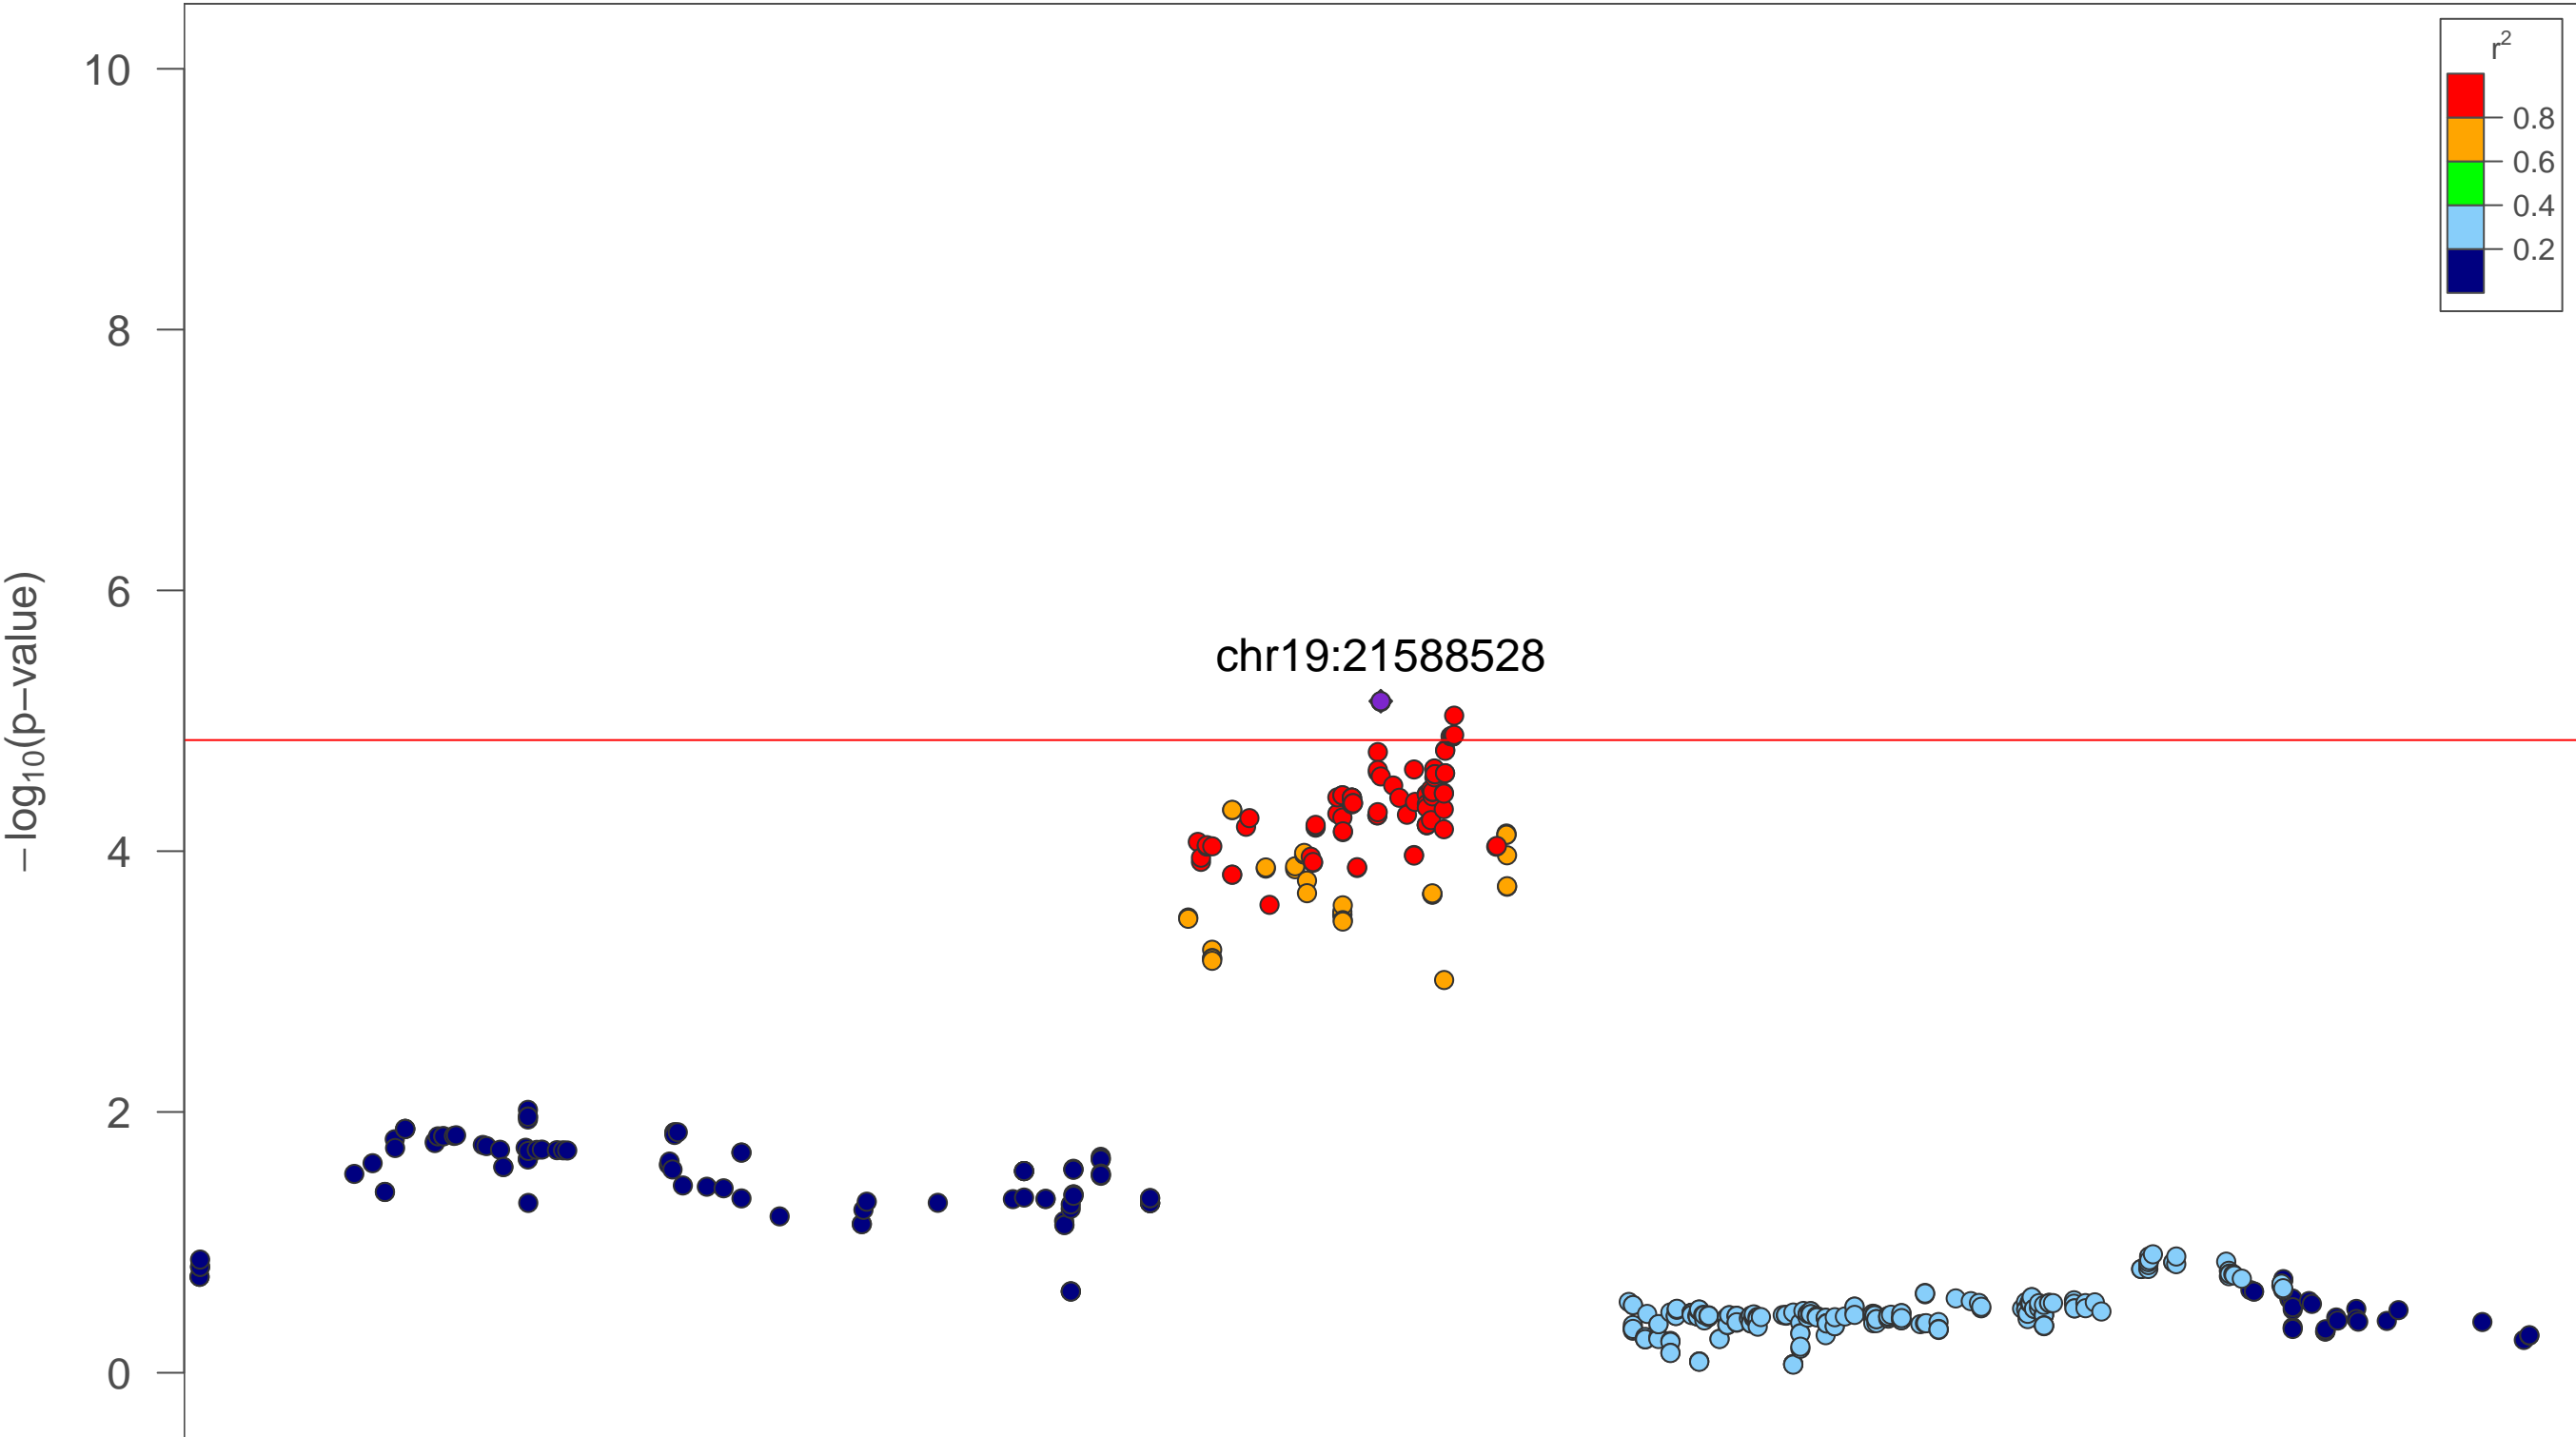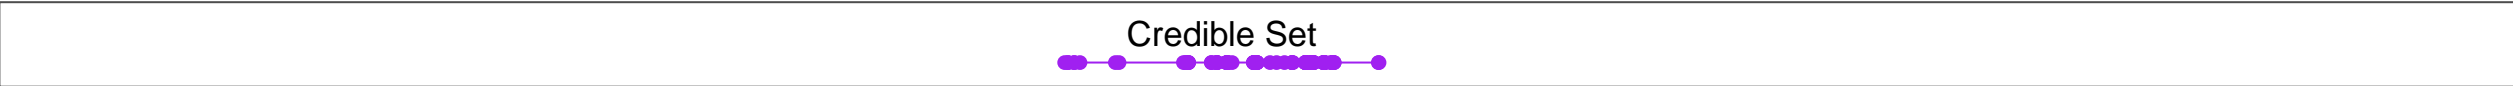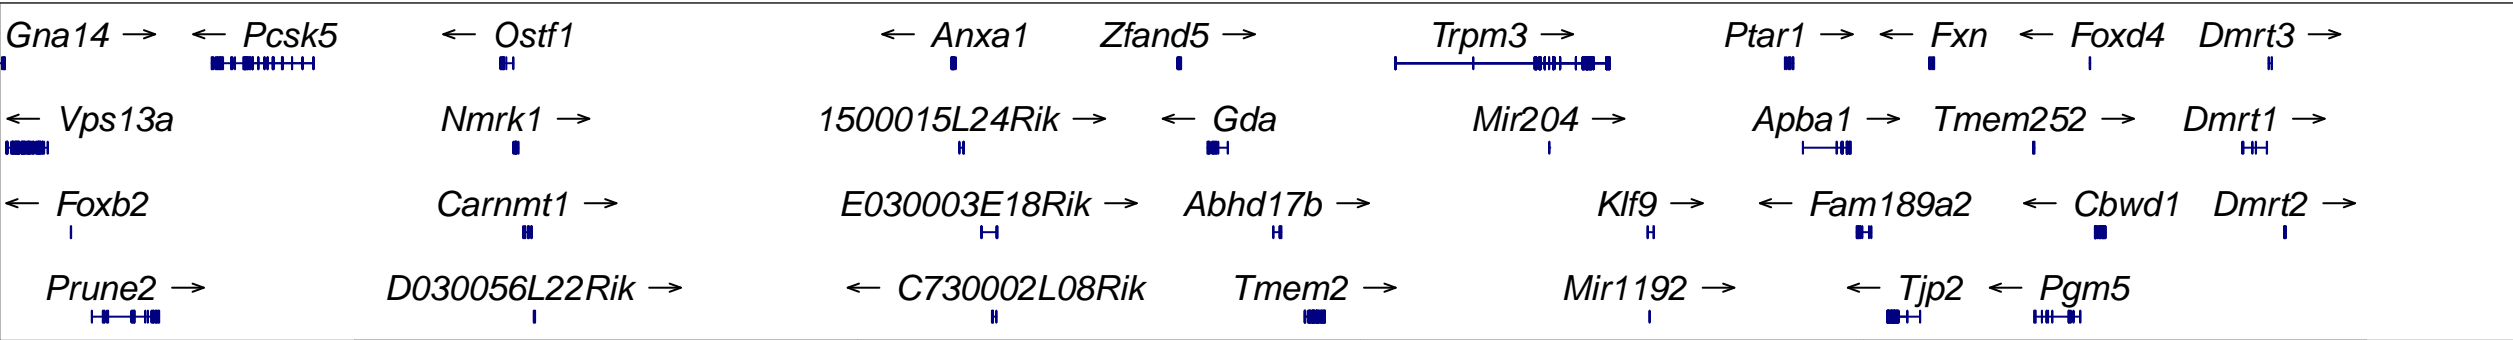

18 genes  
omitted

date: Thu Oct 25 17:02:35 2018

build: F34GBS

display range: chr19:16588528–26588528 [16588528–26588528]

hilite range: 0 – 0 [ 0 – 0 ]

reference SNP: chr19:21588528

number of SNPs plotted: 468

min P-value: 7.07E–6 [chr19:21588528]

max P-value: 8.66E–1 [chr19:23311843]

omitted Genes: Gcnt1, Rfk, Trpm6

omitted Genes: Rorb, Aldh1a1, Aldh1a7

omitted Genes: Tmc1, 4930554I06Rik, 1110059E24Rik

omitted Genes: Smc5, Mamdc2, 1700028P14Rik

omitted Genes: Pip5k1b, Fam122a, Mir3084–1

omitted Genes: Dock8, Kank1, 2610016A17Rik

## Fine-mapping Regions

| snp            | chr | pos (Mb) | pp          | group        | color  |
|----------------|-----|----------|-------------|--------------|--------|
| chr19:20824062 | 19  | 20.82406 | 0.004208088 | Credible Set | purple |
| chr19:20837340 | 19  | 20.83734 | 0.003016468 | Credible Set | purple |
| chr19:20837342 | 19  | 20.83734 | 0.003234779 | Credible Set | purple |
| chr19:20861811 | 19  | 20.86181 | 0.003891778 | Credible Set | purple |
| chr19:20861821 | 19  | 20.86182 | 0.003985128 | Credible Set | purple |
| chr19:20884530 | 19  | 20.88453 | 0.003909079 | Credible Set | purple |
| chr19:21025668 | 19  | 21.02567 | 0.005414121 | Credible Set | purple |
| chr19:21039744 | 19  | 21.03974 | 0.006259725 | Credible Set | purple |
| chr19:21296098 | 19  | 21.29610 | 0.003285971 | Credible Set | purple |
| chr19:21305518 | 19  | 21.30552 | 0.002970110 | Credible Set | purple |
| chr19:21305568 | 19  | 21.30557 | 0.003007889 | Credible Set | purple |
| chr19:21316234 | 19  | 21.31623 | 0.005335891 | Credible Set | purple |
| chr19:21316268 | 19  | 21.31627 | 0.005460410 | Credible Set | purple |
| chr19:21316305 | 19  | 21.31630 | 0.005592177 | Credible Set | purple |
| chr19:21407108 | 19  | 21.40711 | 0.006735416 | Credible Set | purple |
| chr19:21407182 | 19  | 21.40718 | 0.008862111 | Credible Set | purple |
| chr19:21428151 | 19  | 21.42815 | 0.006314288 | Credible Set | purple |
| chr19:21428338 | 19  | 21.42834 | 0.009176532 | Credible Set | purple |
| chr19:21428343 | 19  | 21.42834 | 0.009176532 | Credible Set | purple |
| chr19:21430361 | 19  | 21.43036 | 0.004950147 | Credible Set | purple |
| chr19:21430412 | 19  | 21.43041 | 0.005018073 | Credible Set | purple |
| chr19:21467882 | 19  | 21.46788 | 0.007875532 | Credible Set | purple |
| chr19:21467967 | 19  | 21.46797 | 0.008801371 | Credible Set | purple |
| chr19:21467982 | 19  | 21.46798 | 0.008818367 | Credible Set | purple |
| chr19:21467985 | 19  | 21.46798 | 0.008818367 | Credible Set | purple |
| chr19:21467987 | 19  | 21.46799 | 0.008809916 | Credible Set | purple |
| chr19:21472509 | 19  | 21.47251 | 0.008053099 | Credible Set | purple |
| chr19:21472526 | 19  | 21.47253 | 0.008032139 | Credible Set | purple |
| chr19:21489579 | 19  | 21.48958 | 0.002760087 | Credible Set | purple |
| chr19:21574198 | 19  | 21.57420 | 0.006543297 | Credible Set | purple |
| chr19:21574202 | 19  | 21.57420 | 0.006568182 | Credible Set | purple |
| chr19:21575782 | 19  | 21.57578 | 0.006917508 | Credible Set | purple |
| chr19:21576364 | 19  | 21.57636 | 0.018961711 | Credible Set | purple |
| chr19:21576365 | 19  | 21.57636 | 0.013504963 | Credible Set | purple |
| chr19:21576374 | 19  | 21.57637 | 0.014026219 | Credible Set | purple |
| chr19:21588462 | 19  | 21.58846 | 0.044572147 | Credible Set | purple |

## Fine-mapping Regions

| snp            | chr | pos (Mb) | pp          | group        | color  |
|----------------|-----|----------|-------------|--------------|--------|
| chr19:21588470 | 19  | 21.58847 | 0.044496810 | Credible Set | purple |
| chr19:21588527 | 19  | 21.58853 | 0.044205261 | Credible Set | purple |
| chr19:21588528 | 19  | 21.58853 | 0.044692835 | Credible Set | purple |
| chr19:21588608 | 19  | 21.58861 | 0.012585851 | Credible Set | purple |
| chr19:21640403 | 19  | 21.64040 | 0.010808190 | Credible Set | purple |
| chr19:21666239 | 19  | 21.66624 | 0.008798367 | Credible Set | purple |
| chr19:21697884 | 19  | 21.69788 | 0.006619425 | Credible Set | purple |
| chr19:21727318 | 19  | 21.72732 | 0.003379409 | Credible Set | purple |
| chr19:21727391 | 19  | 21.72739 | 0.003347427 | Credible Set | purple |
| chr19:21727561 | 19  | 21.72756 | 0.014152365 | Credible Set | purple |
| chr19:21731633 | 19  | 21.73163 | 0.008213531 | Credible Set | purple |
| chr19:21780788 | 19  | 21.78079 | 0.009395344 | Credible Set | purple |
| chr19:21780850 | 19  | 21.78085 | 0.009250484 | Credible Set | purple |
| chr19:21780922 | 19  | 21.78092 | 0.005559132 | Credible Set | purple |
| chr19:21780928 | 19  | 21.78093 | 0.005559389 | Credible Set | purple |
| chr19:21780934 | 19  | 21.78093 | 0.005592690 | Credible Set | purple |
| chr19:21780935 | 19  | 21.78093 | 0.005592690 | Credible Set | purple |
| chr19:21781005 | 19  | 21.78101 | 0.007931772 | Credible Set | purple |
| chr19:21781019 | 19  | 21.78102 | 0.007433931 | Credible Set | purple |
| chr19:21798450 | 19  | 21.79845 | 0.010138868 | Credible Set | purple |
| chr19:21798541 | 19  | 21.79854 | 0.006052896 | Credible Set | purple |
| chr19:21804356 | 19  | 21.80436 | 0.009010334 | Credible Set | purple |
| chr19:21804420 | 19  | 21.80442 | 0.009692442 | Credible Set | purple |
| chr19:21804582 | 19  | 21.80458 | 0.009749274 | Credible Set | purple |
| chr19:21812258 | 19  | 21.81226 | 0.014244974 | Credible Set | purple |
| chr19:21812298 | 19  | 21.81230 | 0.014392275 | Credible Set | purple |
| chr19:21812594 | 19  | 21.81259 | 0.012409000 | Credible Set | purple |
| chr19:21814790 | 19  | 21.81479 | 0.013046734 | Credible Set | purple |
| chr19:21814806 | 19  | 21.81481 | 0.013079562 | Credible Set | purple |
| chr19:21851795 | 19  | 21.85179 | 0.007261849 | Credible Set | purple |
| chr19:21852236 | 19  | 21.85224 | 0.009561590 | Credible Set | purple |
| chr19:21852273 | 19  | 21.85227 | 0.009436247 | Credible Set | purple |
| chr19:21852296 | 19  | 21.85230 | 0.005195750 | Credible Set | purple |
| chr19:21857059 | 19  | 21.85706 | 0.013266207 | Credible Set | purple |
| chr19:21857128 | 19  | 21.85713 | 0.013288766 | Credible Set | purple |
| chr19:21857704 | 19  | 21.85770 | 0.019681719 | Credible Set | purple |

Fine-mapping Regions

| snp            | chr | pos (Mb) | pp          | group        | color  |
|----------------|-----|----------|-------------|--------------|--------|
| chr19:21857707 | 19  | 21.85771 | 0.019373102 | Credible Set | purple |
| chr19:21880097 | 19  | 21.88010 | 0.024721873 | Credible Set | purple |
| chr19:21889764 | 19  | 21.88976 | 0.024668792 | Credible Set | purple |
| chr19:21889768 | 19  | 21.88977 | 0.024732248 | Credible Set | purple |
| chr19:21889777 | 19  | 21.88978 | 0.024668792 | Credible Set | purple |
| chr19:21889831 | 19  | 21.88983 | 0.024694632 | Credible Set | purple |
| chr19:21889832 | 19  | 21.88983 | 0.024767928 | Credible Set | purple |
| chr19:21889838 | 19  | 21.88984 | 0.025160262 | Credible Set | purple |
| chr19:21895163 | 19  | 21.89516 | 0.025304821 | Credible Set | purple |
| chr19:21895174 | 19  | 21.89517 | 0.035029357 | Credible Set | purple |
| chr19:22070939 | 19  | 22.07094 | 0.003881712 | Credible Set | purple |
| chr19:22073618 | 19  | 22.07362 | 0.003931898 | Credible Set | purple |

F34 GBS, routine WBC differential monocyte percentage

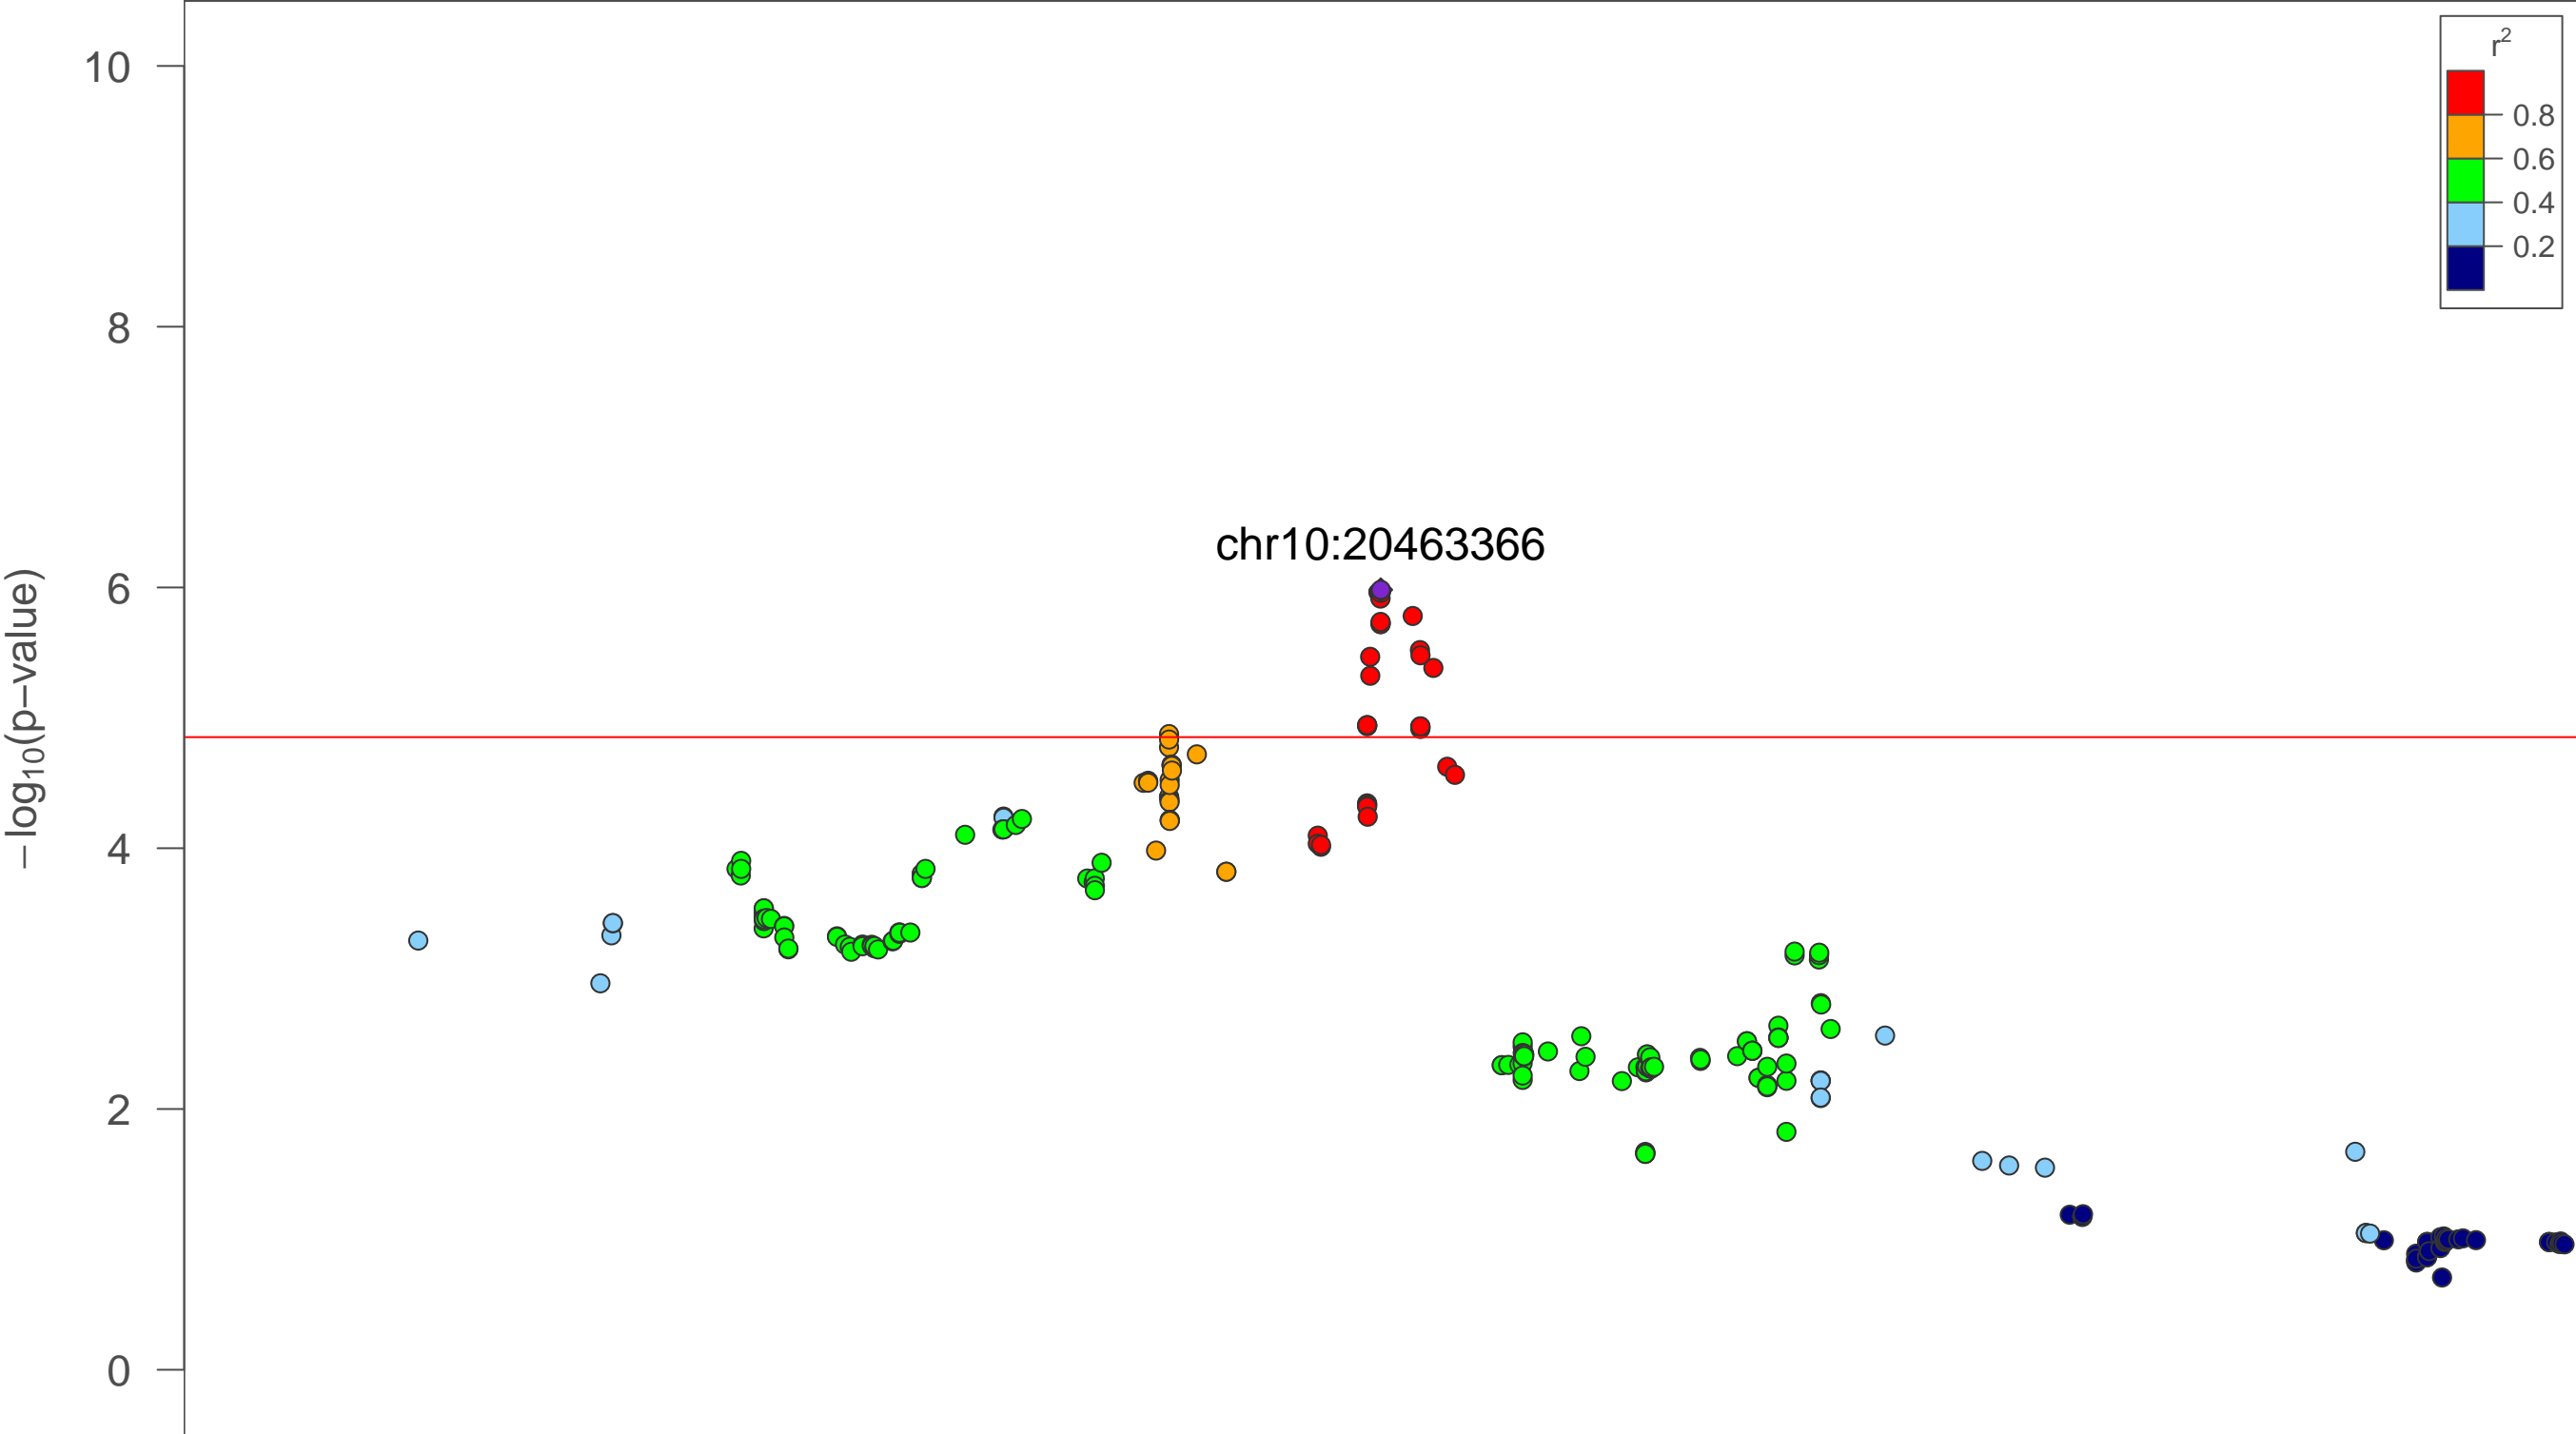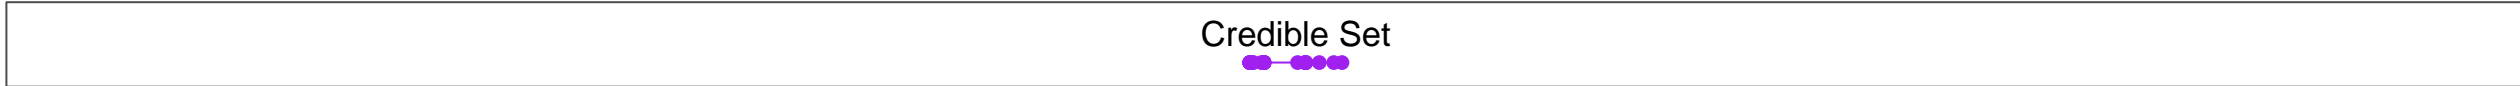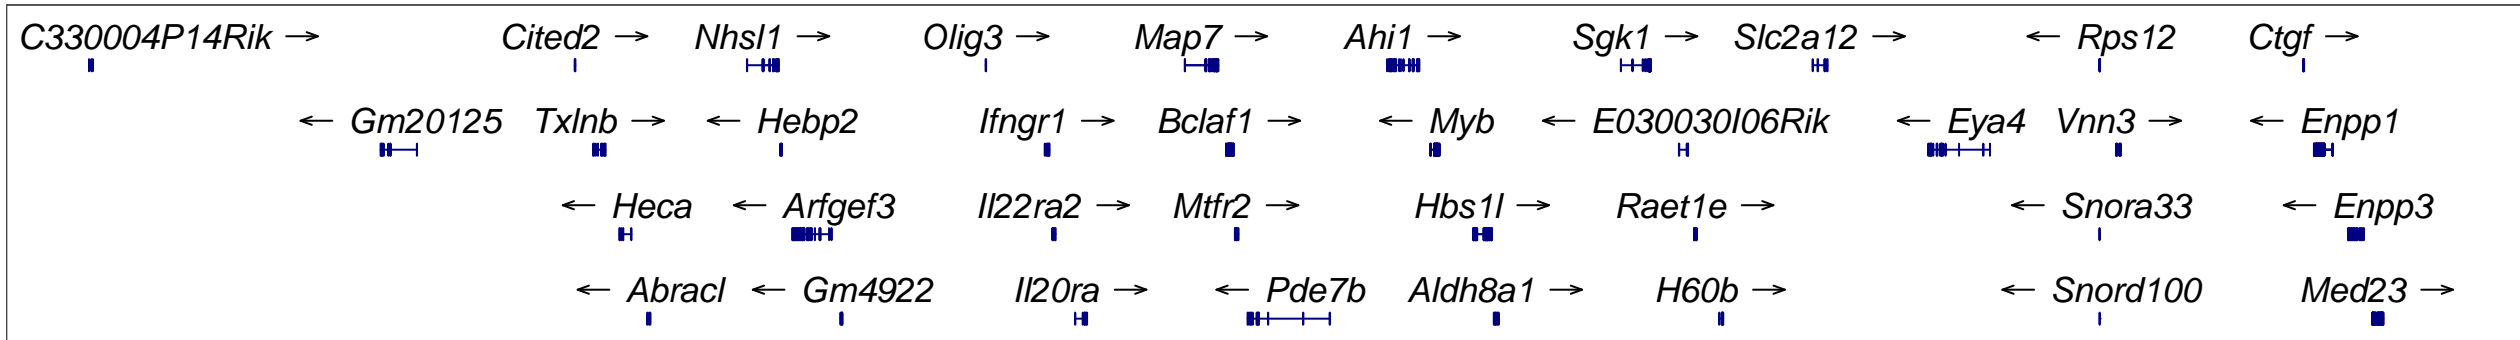

46 genes  
omitted

date: Thu Oct 25 17:02:59 2018  
build: F34GBS  
display range: chr10:15463366–25463366 [15463366–25463366]  
hilite range: 0 – 0 [ 0 – 0 ]  
reference SNP: chr10:20463366  
number of SNPs plotted: 243  
min P-value: 1.04E–6 [chr10:20463366]  
max P-value: 1.96E–1 [chr10:24897369]  
omitted Genes: Repts1, Ect2l, Ccdc28a  
omitted Genes: 4930444F02Rik, Perp, Tnfaip3  
omitted Genes: Gm20139, Slc35d3, Pex7  
omitted Genes: Map3k5, 4930405J17Rik, Rpl32l  
omitted Genes: Mir6413, 4930455C13Rik, 1700020N01Rik  
omitted Genes: Gm5420, 4930444G20Rik, C920009B18Rik  
omitted Genes: Raet1d, Gm10825, Tbp1l  
omitted Genes: Mir7663, Tcf21, Slc18b1  
omitted Genes: Vnn1, Taar1, Taar2  
omitted Genes: Taar3, Taar4, Taar5  
omitted Genes: Taar6, Taar7a, Taar7b  
omitted Genes: Taar7d, Taar7e, Taar7f  
omitted Genes: Taar8a, Taar8b, Taar8c  
omitted Genes: Taar9, Stx7, Moxd1  
omitted Genes: Mir6905, Arg1, Akap7  
omitted Genes: Epb41l2



## Fine-mapping Regions

| snp            | chr | pos (Mb) | pp          | group        | color  |
|----------------|-----|----------|-------------|--------------|--------|
| chr10:20406341 | 10  | 20.40634 | 0.001638727 | Credible Set | purple |
| chr10:20406586 | 10  | 20.40659 | 0.006263026 | Credible Set | purple |
| chr10:20406630 | 10  | 20.40663 | 0.005763847 | Credible Set | purple |
| chr10:20406656 | 10  | 20.40666 | 0.006263026 | Credible Set | purple |
| chr10:20419014 | 10  | 20.41901 | 0.021720278 | Credible Set | purple |
| chr10:20419458 | 10  | 20.41946 | 0.013311268 | Credible Set | purple |
| chr10:20453644 | 10  | 20.45364 | 0.062429059 | Credible Set | purple |
| chr10:20462020 | 10  | 20.46202 | 0.062429059 | Credible Set | purple |
| chr10:20462039 | 10  | 20.46204 | 0.062429059 | Credible Set | purple |
| chr10:20462485 | 10  | 20.46249 | 0.032056139 | Credible Set | purple |
| chr10:20462491 | 10  | 20.46249 | 0.032056139 | Credible Set | purple |
| chr10:20462498 | 10  | 20.46250 | 0.032056139 | Credible Set | purple |
| chr10:20462516 | 10  | 20.46252 | 0.032056139 | Credible Set | purple |
| chr10:20462589 | 10  | 20.46259 | 0.062429059 | Credible Set | purple |
| chr10:20462616 | 10  | 20.46262 | 0.062429059 | Credible Set | purple |
| chr10:20462619 | 10  | 20.46262 | 0.062429059 | Credible Set | purple |
| chr10:20462638 | 10  | 20.46264 | 0.062429059 | Credible Set | purple |
| chr10:20462706 | 10  | 20.46271 | 0.062429059 | Credible Set | purple |
| chr10:20463366 | 10  | 20.46337 | 0.062429059 | Credible Set | purple |
| chr10:20463388 | 10  | 20.46339 | 0.062429059 | Credible Set | purple |
| chr10:20463396 | 10  | 20.46340 | 0.062429059 | Credible Set | purple |
| chr10:20596835 | 10  | 20.59683 | 0.032056139 | Credible Set | purple |
| chr10:20627018 | 10  | 20.62702 | 0.021720278 | Credible Set | purple |
| chr10:20628820 | 10  | 20.62882 | 0.005763847 | Credible Set | purple |
| chr10:20628826 | 10  | 20.62883 | 0.005763847 | Credible Set | purple |
| chr10:20628827 | 10  | 20.62883 | 0.005763847 | Credible Set | purple |
| chr10:20628851 | 10  | 20.62885 | 0.005763847 | Credible Set | purple |
| chr10:20629308 | 10  | 20.62931 | 0.021720278 | Credible Set | purple |
| chr10:20683025 | 10  | 20.68303 | 0.016484013 | Credible Set | purple |
| chr10:20740878 | 10  | 20.74088 | 0.002977462 | Credible Set | purple |
| chr10:20773316 | 10  | 20.77332 | 0.002661898 | Credible Set | purple |

F34 GBS, routine WBC differential monocyte percentage

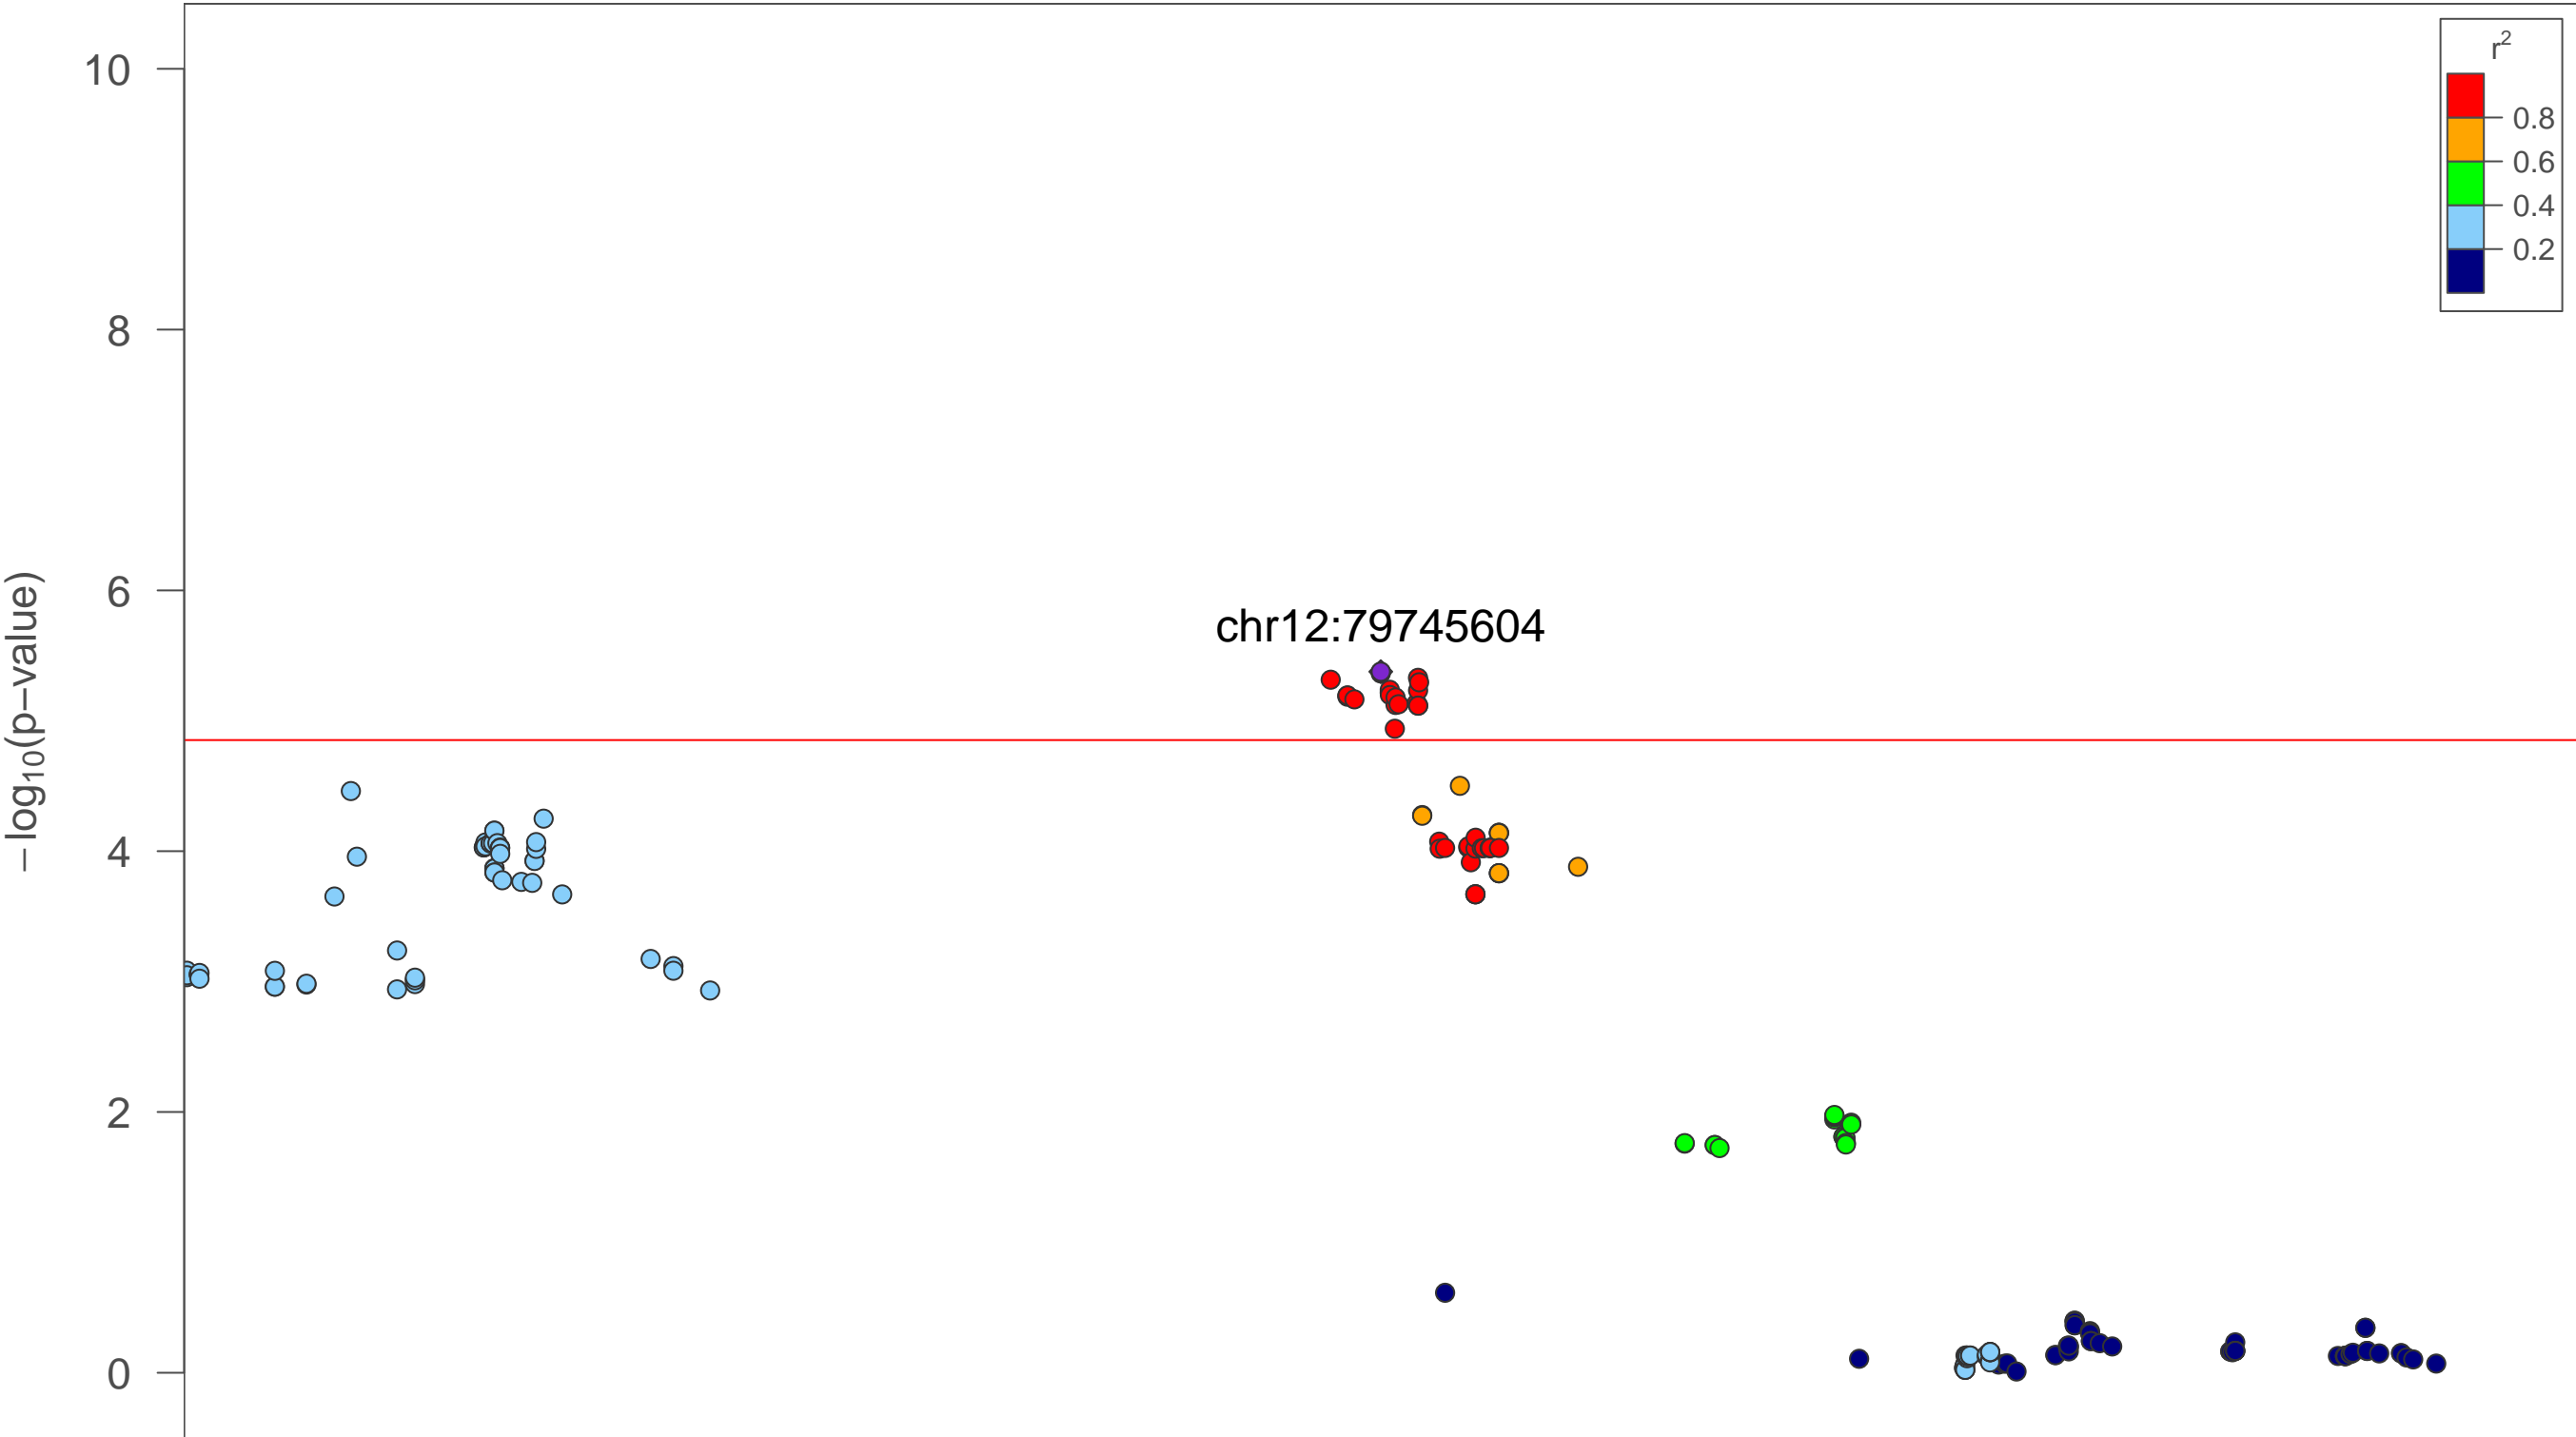

Credible Set

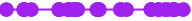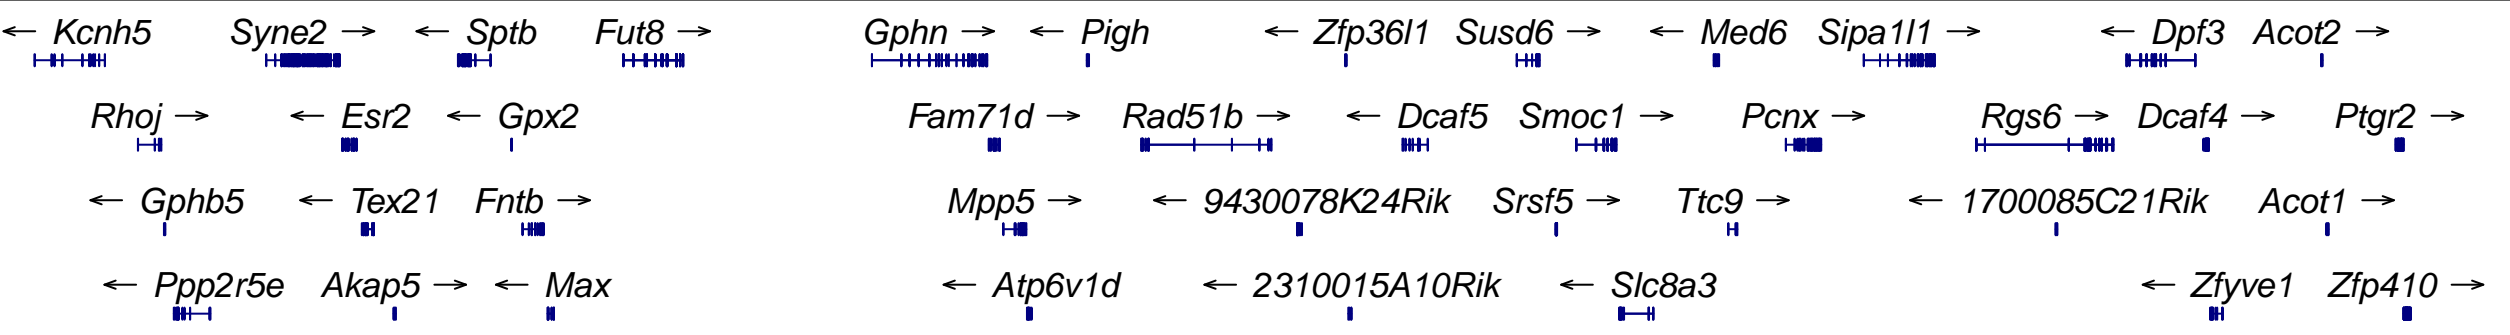

70 genes  
omitted

date: Thu Oct 25 17:03:09 2018  
build: F34GBS  
display range: chr12:74745604–84745604 [74745604–84745604]  
hilite range: 0 – 0 [ 0 – 0 ]  
reference SNP: chr12:79745604  
number of SNPs plotted: 197  
min P-value: 4.2E–6 [chr12:79745604]  
max P-value: 9.78E–1 [chr12:82401670]  
omitted Genes: Wdr89, Rplp2-ps1, Sgpp1  
omitted Genes: Mir5101, Mthfd1, Zbtb25  
omitted Genes: Zbtb1, Hspa2, Ppp1r36  
omitted Genes: Gm10451, Mir5135, Plekhg3  
omitted Genes: Al463170, Churc1, Rab15  
omitted Genes: Eif2s1, Plek2, Tmem229b  
omitted Genes: Plekhh1, 9230116L04Rik, Arg2  
omitted Genes: Vti1b, Rdh11, Rdh12  
omitted Genes: Zfyve26, Actn1, Mir1843a  
omitted Genes: Scarna3b, Exd2, 2310002D06Rik  
omitted Genes: Galnt16, Erh, Slc39a9  
omitted Genes: Plekhd1os, Plekhd1, Ccdc177  
omitted Genes: 1700052I22Rik, Gm20337, Slc10a1  
omitted Genes: Mir3067, Cox16, Synj2bp-cox16  
omitted Genes: Gm4787, Adam4, Synj2bp  
omitted Genes: Adam21, Map3k9, Rbm25  
omitted Genes: Psen1, Papln, Numb  
omitted Genes: 2410016O06Rik, Acot4, Acot3  
omitted Genes: Acot5, Acot6, Dnal1  
omitted Genes: Pnma1, Elmsan1, Fam161b  
omitted Genes: Coq6, Entpd5, Bbof1  
omitted Genes: Rnf113a2, Aldh6a1, Lin52  
omitted Genes: Vsx2, Abcd4, Vrtm  
omitted Genes: Syndig1l

## Fine-mapping Regions

| snp            | chr | pos (Mb) | pp          | group        | color  |
|----------------|-----|----------|-------------|--------------|--------|
| chr12:79536445 | 12  | 79.53645 | 0.055357895 | Credible Set | purple |
| chr12:79606302 | 12  | 79.60630 | 0.041507626 | Credible Set | purple |
| chr12:79606341 | 12  | 79.60634 | 0.042276041 | Credible Set | purple |
| chr12:79606519 | 12  | 79.60652 | 0.042431669 | Credible Set | purple |
| chr12:79635483 | 12  | 79.63548 | 0.039699130 | Credible Set | purple |
| chr12:79745599 | 12  | 79.74560 | 0.063241943 | Credible Set | purple |
| chr12:79745602 | 12  | 79.74560 | 0.061511193 | Credible Set | purple |
| chr12:79745604 | 12  | 79.74560 | 0.063375677 | Credible Set | purple |
| chr12:79783055 | 12  | 79.78306 | 0.044553084 | Credible Set | purple |
| chr12:79783259 | 12  | 79.78326 | 0.046672301 | Credible Set | purple |
| chr12:79783633 | 12  | 79.78363 | 0.042733209 | Credible Set | purple |
| chr12:79804344 | 12  | 79.80434 | 0.024183296 | Credible Set | purple |
| chr12:79807304 | 12  | 79.80730 | 0.036115502 | Credible Set | purple |
| chr12:79807400 | 12  | 79.80740 | 0.040986996 | Credible Set | purple |
| chr12:79819960 | 12  | 79.81996 | 0.036553407 | Credible Set | purple |
| chr12:79896148 | 12  | 79.89615 | 0.037212111 | Credible Set | purple |
| chr12:79901257 | 12  | 79.90126 | 0.057122572 | Credible Set | purple |
| chr12:79901553 | 12  | 79.90155 | 0.046158253 | Credible Set | purple |
| chr12:79901695 | 12  | 79.90170 | 0.035686737 | Credible Set | purple |
| chr12:79901736 | 12  | 79.90174 | 0.035686737 | Credible Set | purple |
| chr12:79905916 | 12  | 79.90592 | 0.052976006 | Credible Set | purple |
| chr12:79989743 | 12  | 79.98974 | 0.003638209 | Credible Set | purple |
| chr12:79991638 | 12  | 79.99164 | 0.003233201 | Credible Set | purple |
| chr12:80014258 | 12  | 80.01426 | 0.003275603 | Credible Set | purple |
| chr12:80111333 | 12  | 80.11133 | 0.003289963 | Credible Set | purple |
| chr12:80111773 | 12  | 80.11177 | 0.003369705 | Credible Set | purple |
| chr12:80141156 | 12  | 80.14116 | 0.003240498 | Credible Set | purple |
| chr12:80141872 | 12  | 80.14187 | 0.003885293 | Credible Set | purple |
| chr12:80167644 | 12  | 80.16764 | 0.003260801 | Credible Set | purple |
| chr12:80176656 | 12  | 80.17666 | 0.003264987 | Credible Set | purple |
| chr12:80200997 | 12  | 80.20100 | 0.003275603 | Credible Set | purple |
| chr12:80201015 | 12  | 80.20101 | 0.003275603 | Credible Set | purple |
| chr12:80203854 | 12  | 80.20385 | 0.003275603 | Credible Set | purple |
| chr12:80203855 | 12  | 80.20386 | 0.003275603 | Credible Set | purple |
| chr12:80239462 | 12  | 80.23946 | 0.003274306 | Credible Set | purple |

F34 GBS, routine WBC differential monocyte percentage

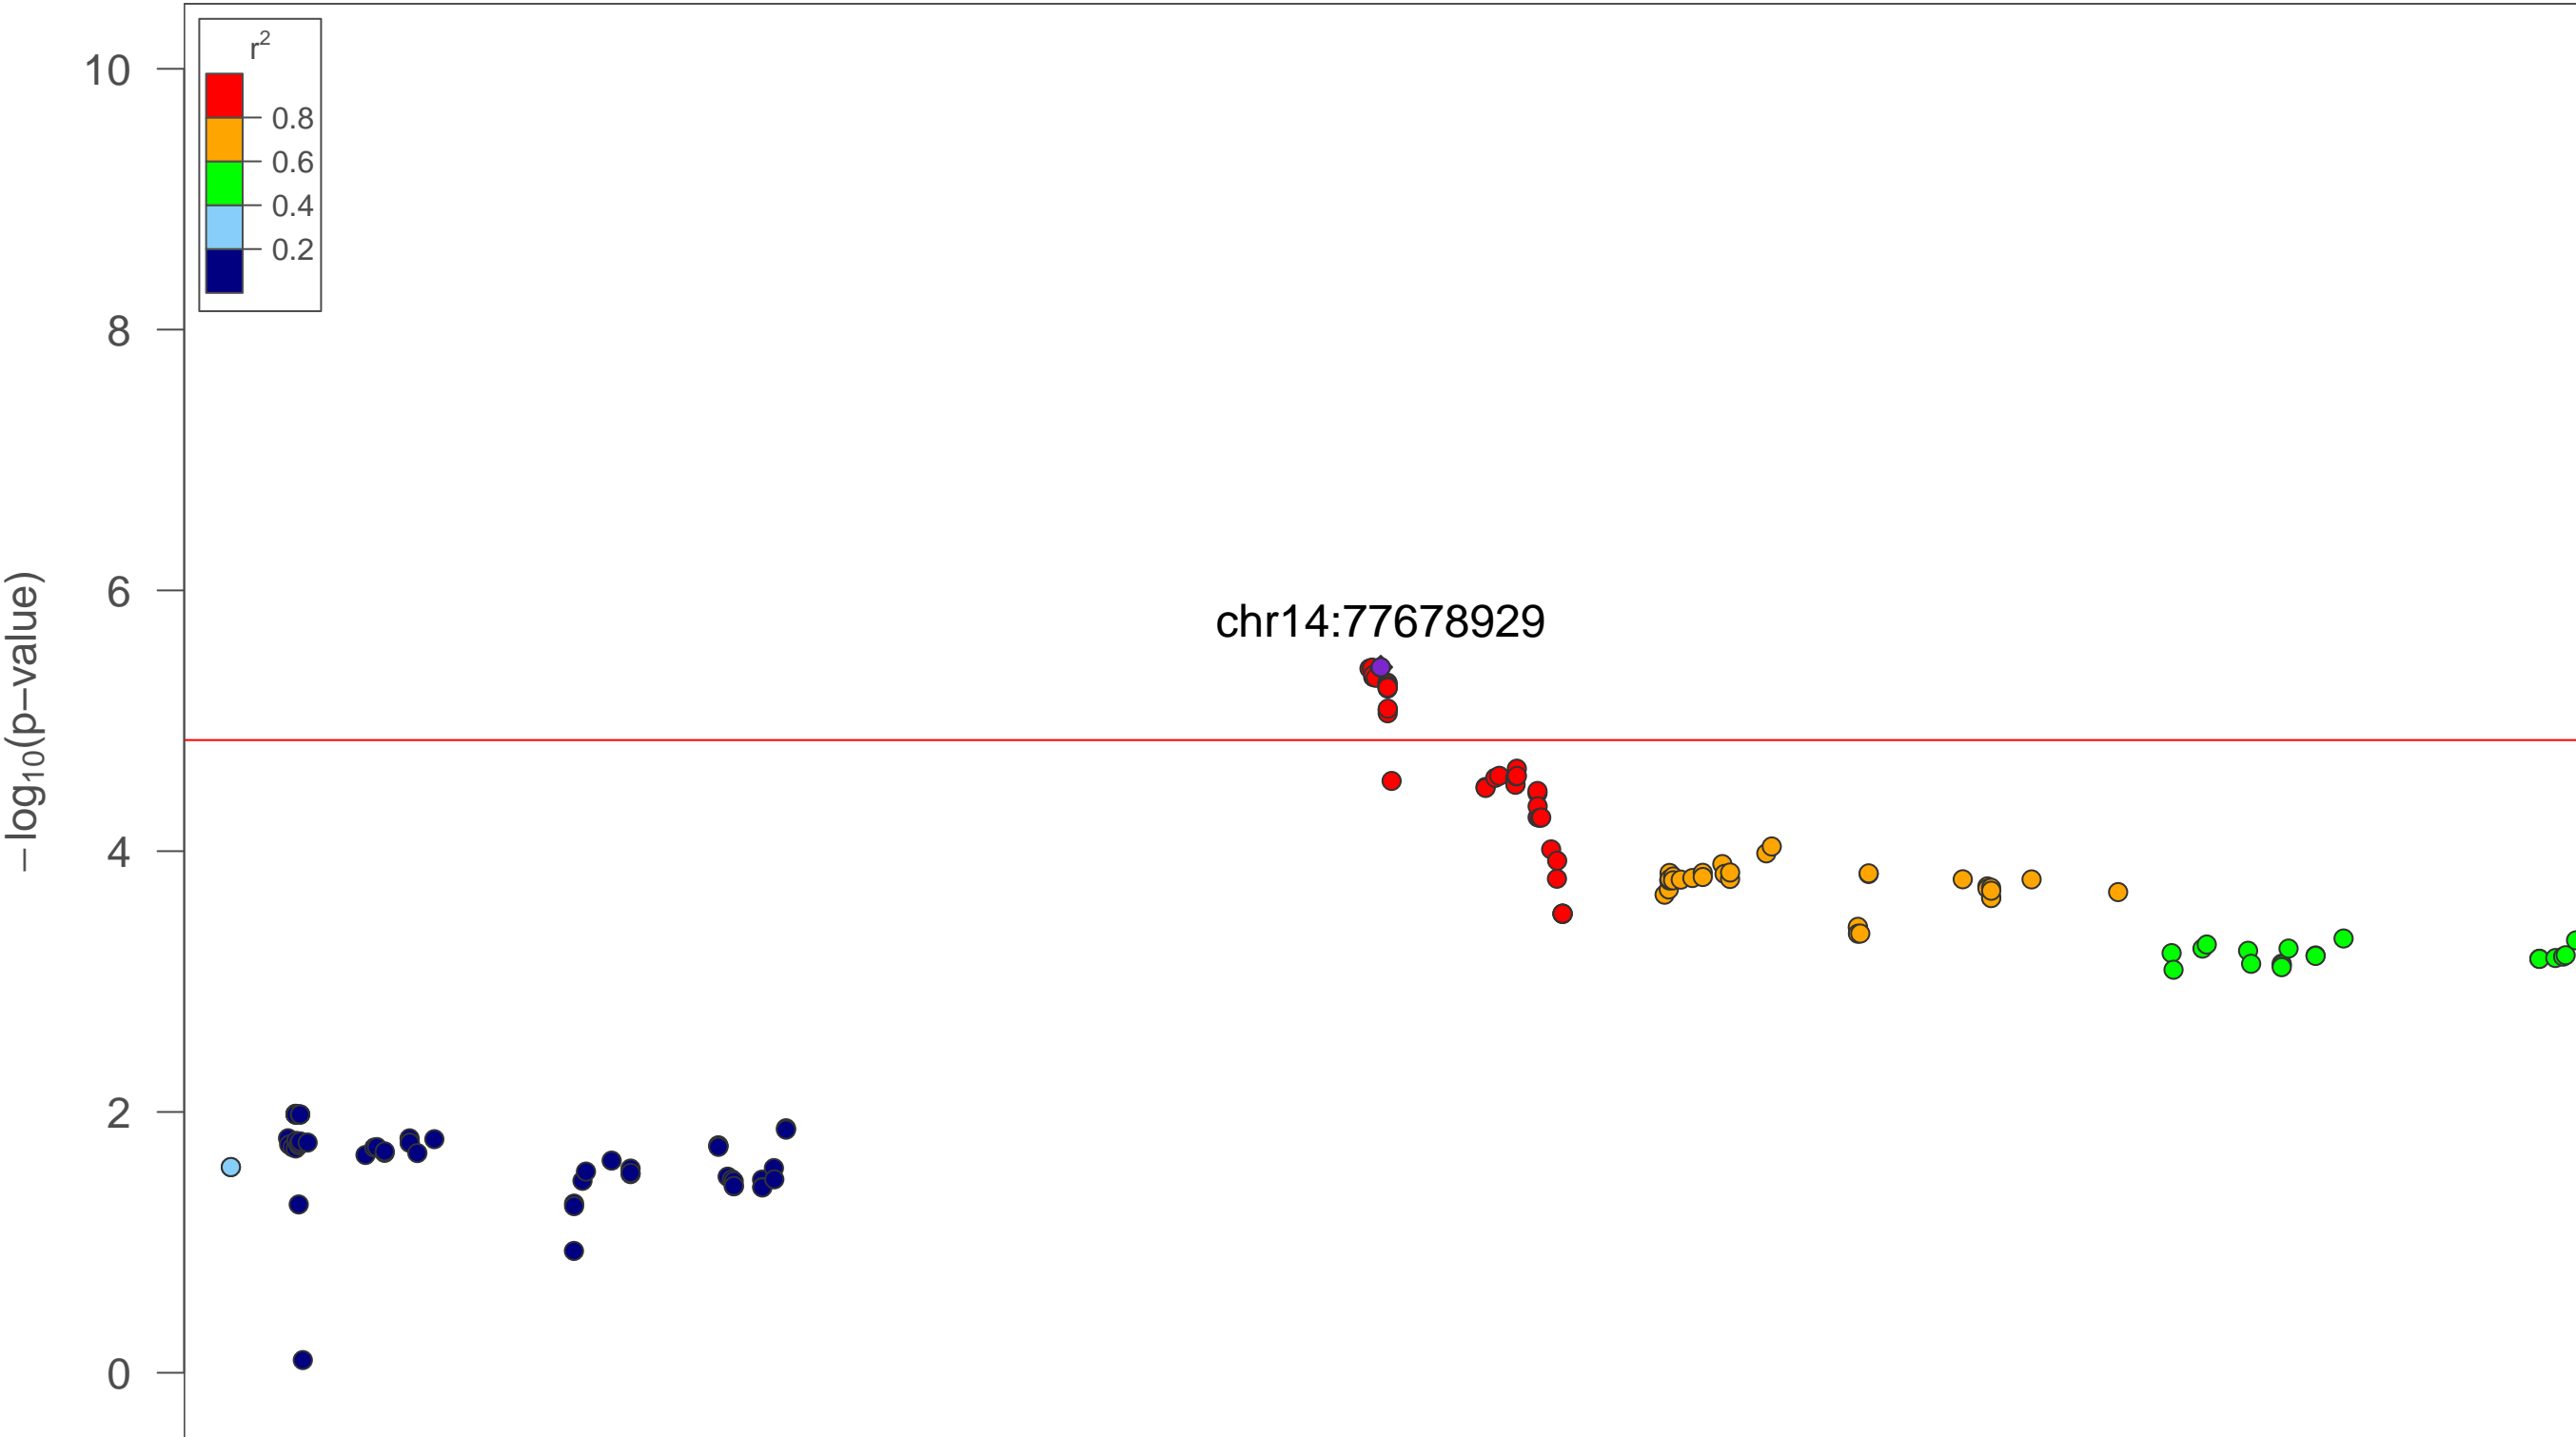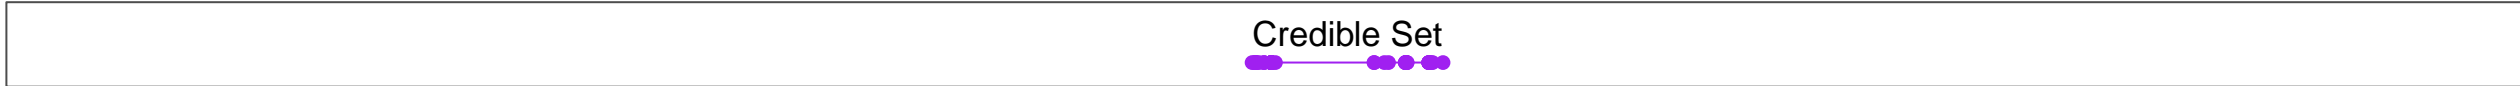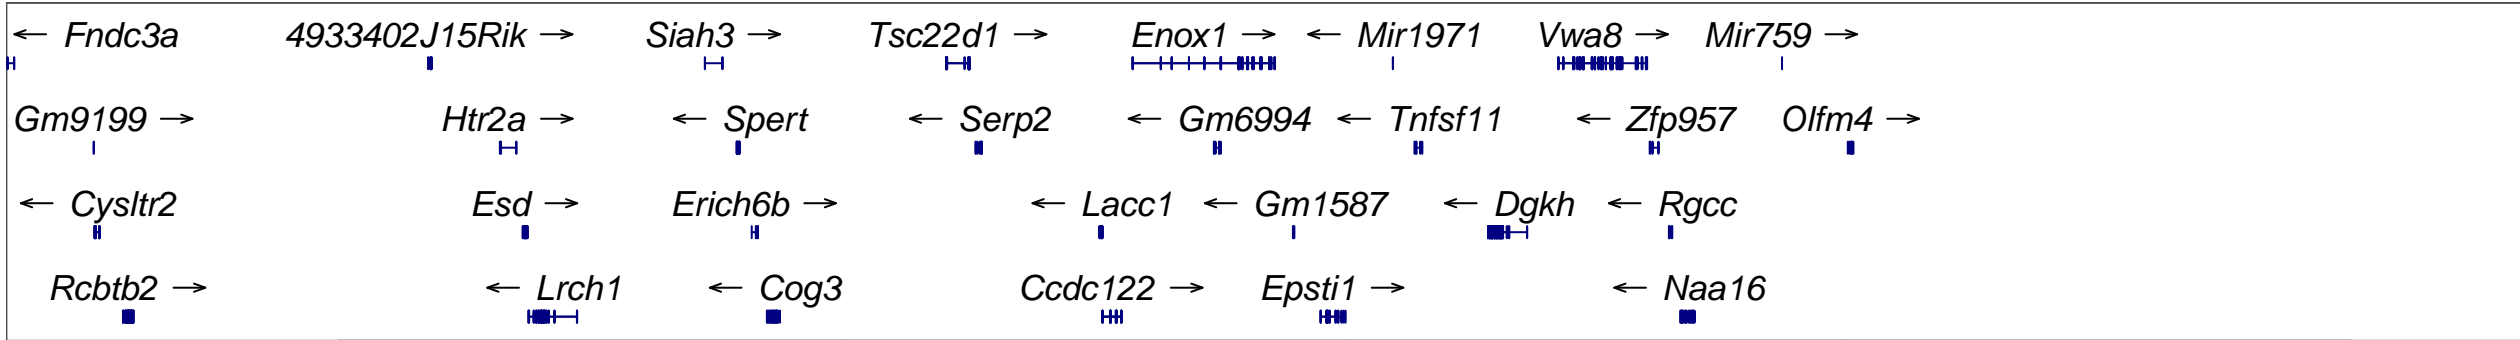

36 genes  
omitted

date: Thu Oct 25 17:03:18 2018  
build: F34GBS  
display range: chr14:72678929–82678929 [72678929–82678929]  
hilite range: 0 – 0 [ 0 – 0 ]  
reference SNP: chr14:77678929  
number of SNPs plotted: 153  
min P-value: 3.88E–6 [chr14:77678929]  
max P-value: 7.99E–1 [chr14:73175203]  
omitted Genes: Rb1, Mir687, Lpar6  
omitted Genes: Itm2b, Med4, Nudt15  
omitted Genes: Sucla2, Gm4278, 5031414D18Rik  
omitted Genes: Lrrc63, Lcp1, Cpb2  
omitted Genes: Zc3h13, Slc25a30, Gm4285  
omitted Genes: Tpt1, Snora31, Gtf2f2  
omitted Genes: Kctd4, Gpalpp1, Nufip1  
omitted Genes: 4930444M15Rik, 1700108F19Rik, Dnajc15  
omitted Genes: Fam216b, Akap11, Mtrf1  
omitted Genes: Kbtbd7, Kbtbd6, Wbp4  
omitted Genes: Elf1, Sugt1, Lect1  
omitted Genes: 4930452G13Rik, Pcdh8, Gm10845

## Fine-mapping Regions

| snp            | chr | pos (Mb) | pp          | group        | color  |
|----------------|-----|----------|-------------|--------------|--------|
| chr14:77631724 | 14  | 77.63172 | 0.060931650 | Credible Set | purple |
| chr14:77642597 | 14  | 77.64260 | 0.061706763 | Credible Set | purple |
| chr14:77642802 | 14  | 77.64280 | 0.061706763 | Credible Set | purple |
| chr14:77647283 | 14  | 77.64728 | 0.052703501 | Credible Set | purple |
| chr14:77647687 | 14  | 77.64769 | 0.054714719 | Credible Set | purple |
| chr14:77658356 | 14  | 77.65836 | 0.052057048 | Credible Set | purple |
| chr14:77678847 | 14  | 77.67885 | 0.062164900 | Credible Set | purple |
| chr14:77678929 | 14  | 77.67893 | 0.062313732 | Credible Set | purple |
| chr14:77707033 | 14  | 77.70703 | 0.047953004 | Credible Set | purple |
| chr14:77707351 | 14  | 77.70735 | 0.047078685 | Credible Set | purple |
| chr14:77707392 | 14  | 77.70739 | 0.045308725 | Credible Set | purple |
| chr14:77707431 | 14  | 77.70743 | 0.044366826 | Credible Set | purple |
| chr14:77707491 | 14  | 77.70749 | 0.043387652 | Credible Set | purple |
| chr14:77707493 | 14  | 77.70749 | 0.044179531 | Credible Set | purple |
| chr14:77707780 | 14  | 77.70778 | 0.030242221 | Credible Set | purple |
| chr14:77707832 | 14  | 77.70783 | 0.028586543 | Credible Set | purple |
| chr14:77708407 | 14  | 77.70841 | 0.030906687 | Credible Set | purple |
| chr14:77724180 | 14  | 77.72418 | 0.009154335 | Credible Set | purple |
| chr14:78116598 | 14  | 78.11660 | 0.008271824 | Credible Set | purple |
| chr14:78116913 | 14  | 78.11691 | 0.008135150 | Credible Set | purple |
| chr14:78157408 | 14  | 78.15741 | 0.009649219 | Credible Set | purple |
| chr14:78173886 | 14  | 78.17389 | 0.009978527 | Credible Set | purple |
| chr14:78240912 | 14  | 78.24091 | 0.009608270 | Credible Set | purple |
| chr14:78240962 | 14  | 78.24096 | 0.009383688 | Credible Set | purple |
| chr14:78241501 | 14  | 78.24150 | 0.008658576 | Credible Set | purple |
| chr14:78241810 | 14  | 78.24181 | 0.008582225 | Credible Set | purple |
| chr14:78245017 | 14  | 78.24502 | 0.009894615 | Credible Set | purple |
| chr14:78245066 | 14  | 78.24507 | 0.010025453 | Credible Set | purple |
| chr14:78247459 | 14  | 78.24746 | 0.011247210 | Credible Set | purple |
| chr14:78247805 | 14  | 78.24780 | 0.009955304 | Credible Set | purple |
| chr14:78333693 | 14  | 78.33369 | 0.007444743 | Credible Set | purple |
| chr14:78333727 | 14  | 78.33373 | 0.007735171 | Credible Set | purple |
| chr14:78334235 | 14  | 78.33424 | 0.004976995 | Credible Set | purple |
| chr14:78334352 | 14  | 78.33435 | 0.005985134 | Credible Set | purple |
| chr14:78342935 | 14  | 78.34293 | 0.004937596 | Credible Set | purple |
| chr14:78349294 | 14  | 78.34929 | 0.004956184 | Credible Set | purple |

Fine-mapping Regions

| snp            | chr | pos (Mb) | pp          | group        | color  |
|----------------|-----|----------|-------------|--------------|--------|
| chr14:78390714 | 14  | 78.39071 | 0.002912681 | Credible Set | purple |



# F34 GBS, routine WBC differential eosinophil percentage

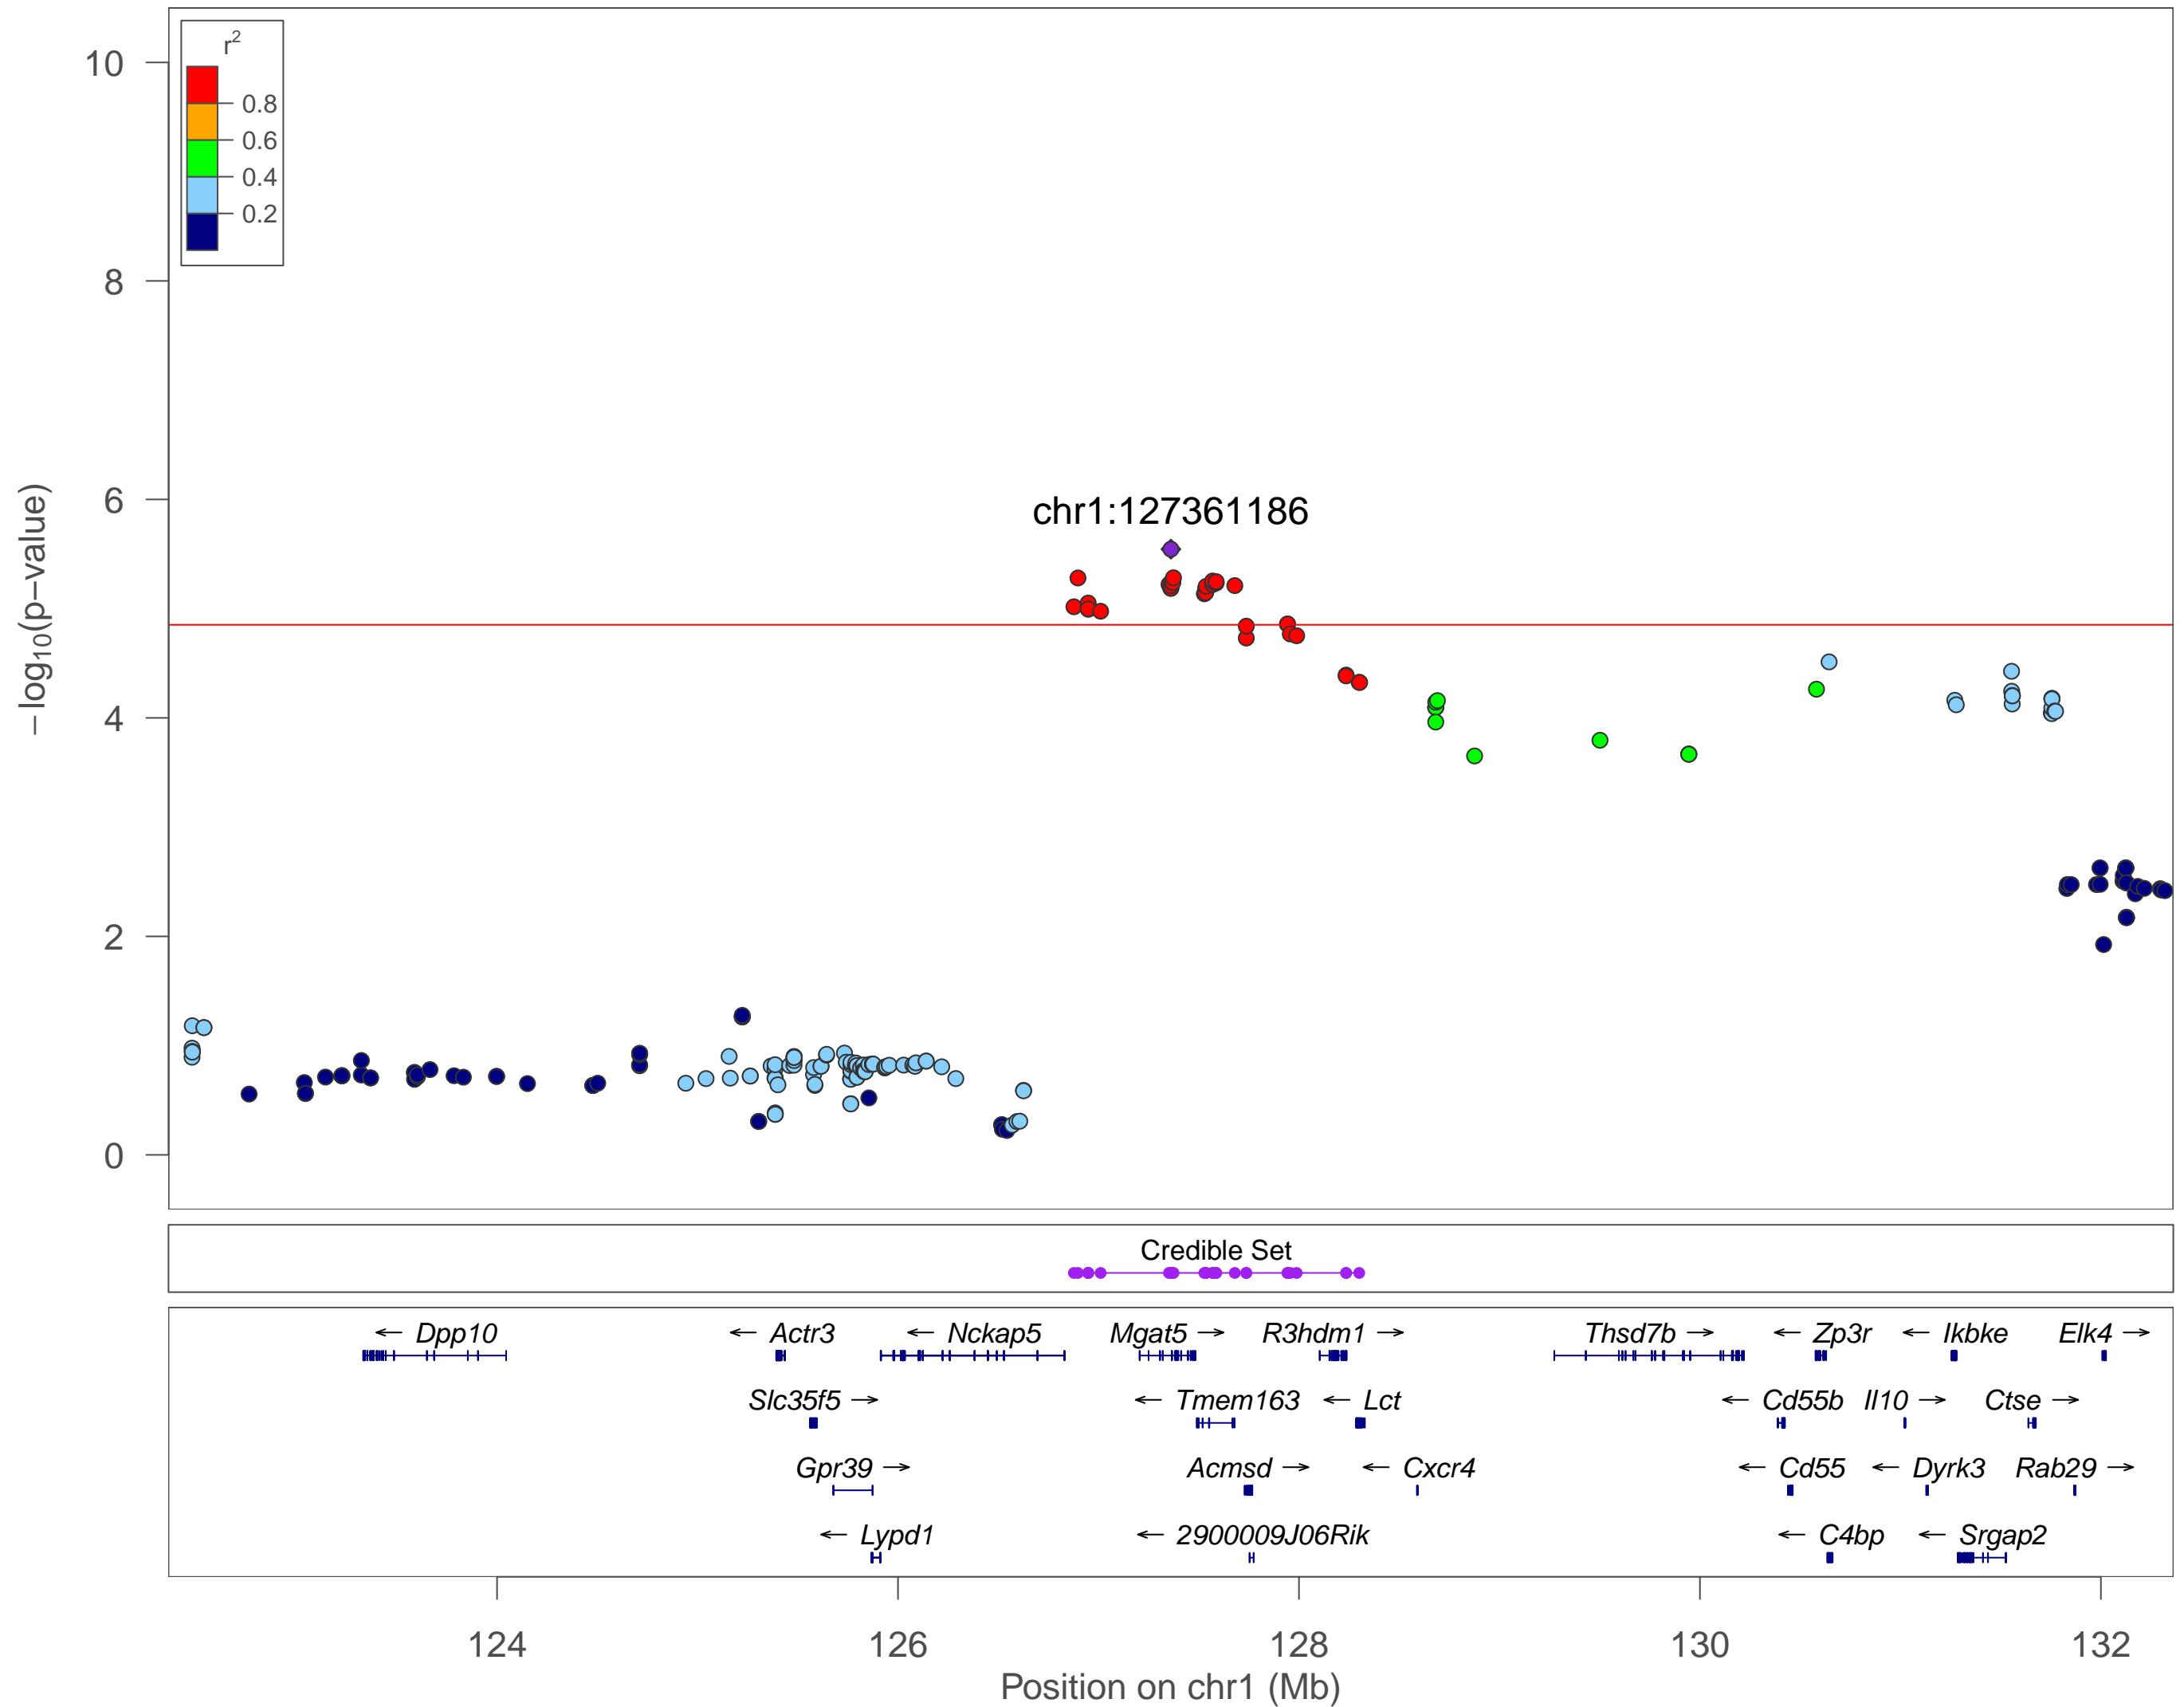

date: Thu Oct 25 17:03:50 2018

build: F34GBS

display range: chr1:122361186–132361186 [122361186–132361186]

hilite range: 0 – 0 [ 0 – 0 ]

reference SNP: chr1:127361186

number of SNPs plotted: 227

min P-value: 2.85E–6 [chr1:127361186]

max P-value: 5.97E–1 [chr1:126542829]

omitted Genes: Ccnt2, Map3k19, Rab3gap1

omitted Genes: Zranb3, Mir128–1, Ubxn4

omitted Genes: Mcm6, Dars, C4bp–ps1

omitted Genes: Pfkfb2, Yod1, AA986860

omitted Genes: Fcamr, Pigr, Fcmr

omitted Genes: Il24, Il20, Il19

omitted Genes: Mapkapk2, Eif2d, Rassf5

omitted Genes: Fam72a, Avpr1b, Rab7b

omitted Genes: Slc26a9, Pm20d1, Slc41a1

omitted Genes: Nucks1, Slc45a3, Mfsd4a

omitted Genes: Cdk18, Lemd1, Mir135b

omitted Genes: Klhdc8a, Nuak2, Tmcc2

## Fine-mapping Regions

| snp            | chr | pos (Mb) | pp          | group        | color  |
|----------------|-----|----------|-------------|--------------|--------|
| chr1:126877472 | 1   | 126.8775 | 0.024408867 | Credible Set | purple |
| chr1:126897506 | 1   | 126.8975 | 0.043620608 | Credible Set | purple |
| chr1:126948531 | 1   | 126.9485 | 0.026317821 | Credible Set | purple |
| chr1:126948932 | 1   | 126.9489 | 0.023233275 | Credible Set | purple |
| chr1:126948973 | 1   | 126.9490 | 0.023366825 | Credible Set | purple |
| chr1:127010566 | 1   | 127.0106 | 0.022312139 | Credible Set | purple |
| chr1:127351820 | 1   | 127.3518 | 0.038332922 | Credible Set | purple |
| chr1:127360988 | 1   | 127.3610 | 0.035420933 | Credible Set | purple |
| chr1:127360991 | 1   | 127.3610 | 0.035420933 | Credible Set | purple |
| chr1:127361132 | 1   | 127.3611 | 0.037356199 | Credible Set | purple |
| chr1:127361186 | 1   | 127.3612 | 0.078016154 | Credible Set | purple |
| chr1:127366123 | 1   | 127.3661 | 0.039908366 | Credible Set | purple |
| chr1:127367650 | 1   | 127.3676 | 0.041023204 | Credible Set | purple |
| chr1:127370999 | 1   | 127.3710 | 0.039818213 | Credible Set | purple |
| chr1:127373912 | 1   | 127.3739 | 0.043808802 | Credible Set | purple |
| chr1:127528010 | 1   | 127.5280 | 0.031706054 | Credible Set | purple |
| chr1:127534149 | 1   | 127.5341 | 0.035372315 | Credible Set | purple |
| chr1:127534857 | 1   | 127.5349 | 0.032409527 | Credible Set | purple |
| chr1:127537075 | 1   | 127.5371 | 0.036834344 | Credible Set | purple |
| chr1:127569392 | 1   | 127.5694 | 0.038263434 | Credible Set | purple |
| chr1:127569489 | 1   | 127.5695 | 0.041012765 | Credible Set | purple |
| chr1:127586872 | 1   | 127.5869 | 0.039431793 | Credible Set | purple |
| chr1:127586881 | 1   | 127.5869 | 0.040471969 | Credible Set | purple |
| chr1:127679838 | 1   | 127.6798 | 0.037394863 | Credible Set | purple |
| chr1:127737207 | 1   | 127.7372 | 0.013012840 | Credible Set | purple |
| chr1:127737208 | 1   | 127.7372 | 0.016523559 | Credible Set | purple |
| chr1:127942547 | 1   | 127.9425 | 0.017181009 | Credible Set | purple |
| chr1:127943084 | 1   | 127.9431 | 0.017276226 | Credible Set | purple |
| chr1:127956570 | 1   | 127.9566 | 0.014120763 | Credible Set | purple |
| chr1:127988443 | 1   | 127.9884 | 0.013632031 | Credible Set | purple |
| chr1:128235181 | 1   | 128.2352 | 0.006193451 | Credible Set | purple |
| chr1:128235351 | 1   | 128.2354 | 0.006090698 | Credible Set | purple |
| chr1:128300314 | 1   | 128.3003 | 0.005360983 | Credible Set | purple |

# F34 GBS, routine WBC differential large unstained cell number

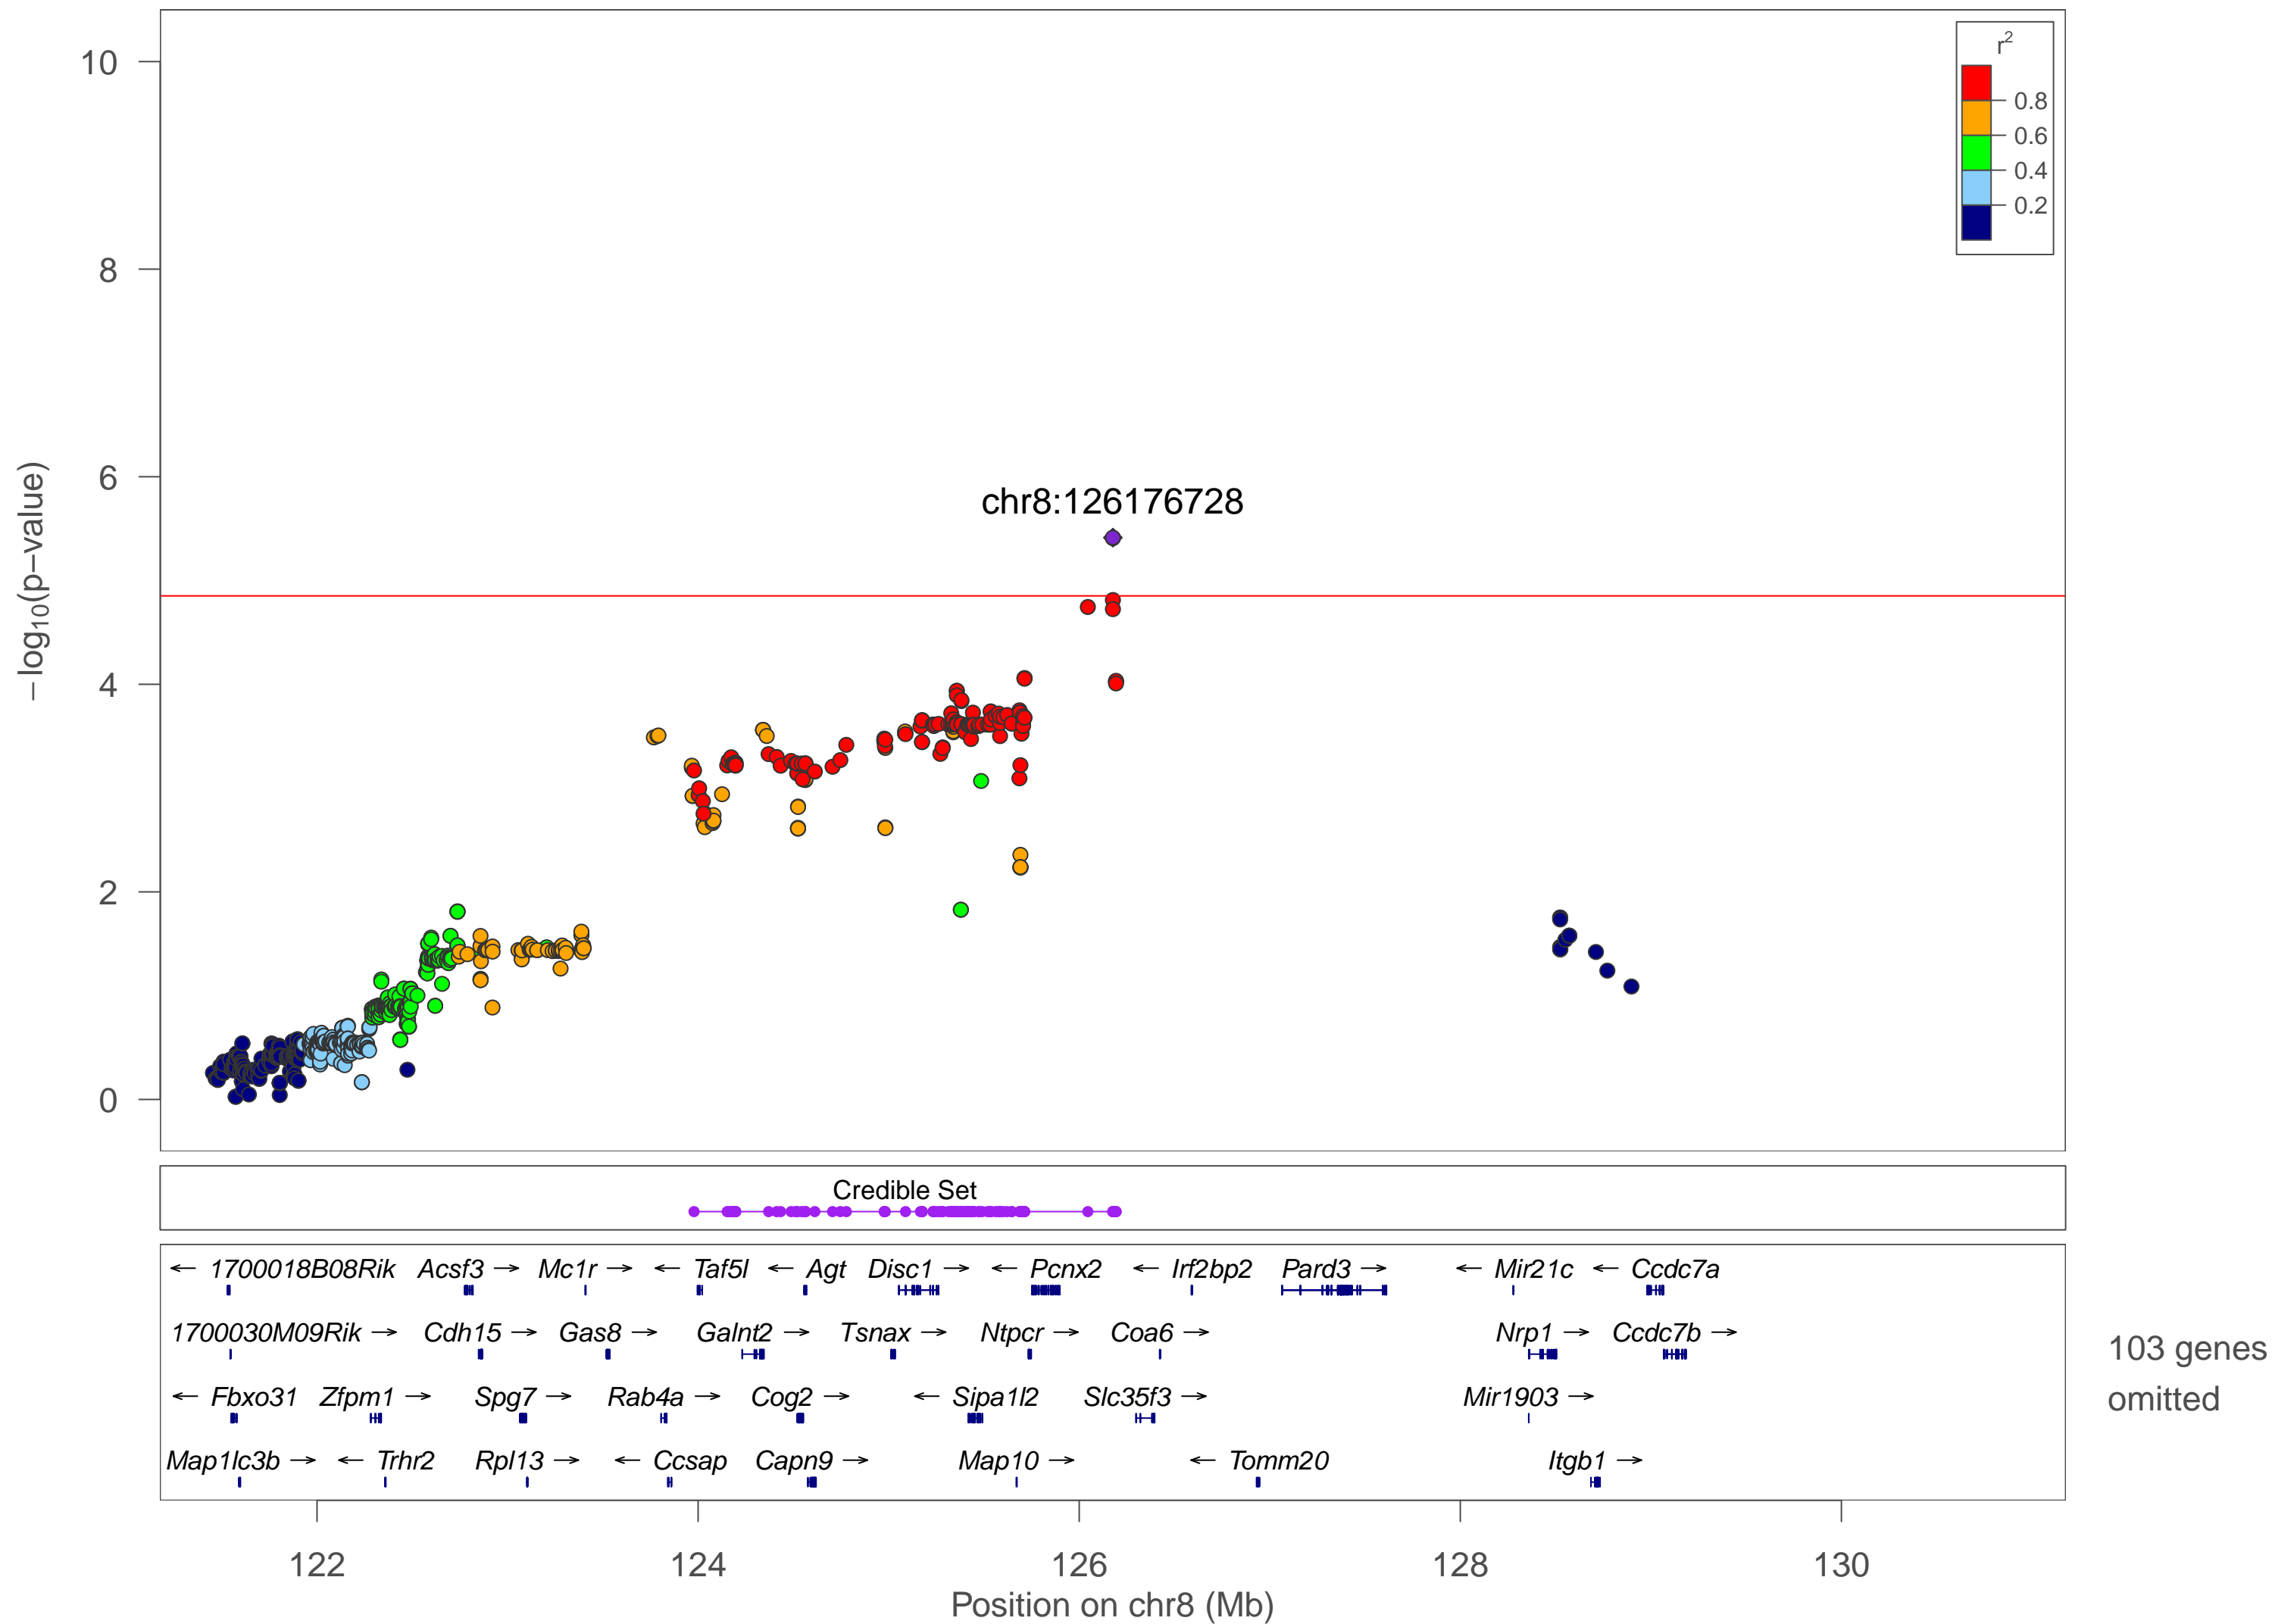

date: Thu Oct 25 17:04:01 2018

build: F34GBS

display range: chr8:121176728–131176728 [121176728–131176728]

hilite range: 0 – 0 [ 0 – 0 ]

reference SNP: chr8:126176728

number of SNPs plotted: 850

min P-value: 3.86E–6 [chr8:126176728]

max P-value: 9.45E–1 [chr8:121573290]

omitted Genes: Zcchc14, Jph3, Klhdc4

omitted Genes: Slc7a5, BC048644, Car5a

omitted Genes: Banp, Mir7237, Zc3h18

omitted Genes: Il17c, Cyba, Mvd

omitted Genes: 9330133O14Rik, Gm20735, Snai3

omitted Genes: Rnf166, Ctu2, Piezo1

omitted Genes: Cdt1, Aprt, Galns

omitted Genes: Trappc2l, Pabpn1l, Mir6396

omitted Genes: Cbfa2t3, Ankrd11, 2810013P06Rik

omitted Genes: Snord68, Mir7079, Cpne7

omitted Genes: Mir7080, Sult5a1, Dpep1

omitted Genes: Chmp1a, Spata33, Cdk10

omitted Genes: Spata2l, 4933417D19Rik, Vps9d1

omitted Genes: Zfp276, Fanca, Spire2

omitted Genes: Tcf25, Tubb3, Def8

omitted Genes: Afg3l1, Dbnidd1, n-R5s100

omitted Genes: n-R5s103, n-R5s104, n-R5s105

omitted Genes: n-R5s108, n-R5s110, n-R5s111

omitted Genes: n-R5s113, Gm25018, n-R5s117

omitted Genes: n-R5s121, n-R5s122, n-R5s123

omitted Genes: n-R5s124, n-R5s128, Gm26391

omitted Genes: n-R5s133, n-R5s134, Rn5s

omitted Genes: n-R5s136, n-R5s138, n-R5s139

omitted Genes: Gm22109, n-R5s141, n-R5s142

omitted Genes: n-R5s143, n-R5s144, Gm25212

omitted Genes: n-R5s146, Gm22291, Gm23284

omitted Genes: n-R5s149, Rhou, 6030466F02Rik

omitted Genes: Acta1, Nup133, Abcb10

omitted Genes: Mir1967, Urb2, Pgbd5

omitted Genes: 2310022B05Rik, Ttc13, Arv1

omitted Genes: Fam89a, Trim67, 2810004N23Rik

omitted Genes: Cnpat, Exoc8, Sortn

Make more plots at <http://csg.sph.umich.edu/locuszoom/>

## Fine-mapping Regions

| snp            | chr | pos (Mb) | pp          | group        | color  |
|----------------|-----|----------|-------------|--------------|--------|
| chr8:123978600 | 8   | 123.9786 | 0.001528413 | Credible Set | purple |
| chr8:124152632 | 8   | 124.1526 | 0.001694062 | Credible Set | purple |
| chr8:124159766 | 8   | 124.1598 | 0.001867781 | Credible Set | purple |
| chr8:124173734 | 8   | 124.1737 | 0.002006165 | Credible Set | purple |
| chr8:124180762 | 8   | 124.1808 | 0.001746288 | Credible Set | purple |
| chr8:124189418 | 8   | 124.1894 | 0.001759202 | Credible Set | purple |
| chr8:124196154 | 8   | 124.1962 | 0.001685875 | Credible Set | purple |
| chr8:124196376 | 8   | 124.1964 | 0.001796655 | Credible Set | purple |
| chr8:124197071 | 8   | 124.1971 | 0.001759825 | Credible Set | purple |
| chr8:124197277 | 8   | 124.1973 | 0.001700089 | Credible Set | purple |
| chr8:124370035 | 8   | 124.3700 | 0.002142741 | Credible Set | purple |
| chr8:124412466 | 8   | 124.4125 | 0.002019464 | Credible Set | purple |
| chr8:124433098 | 8   | 124.4331 | 0.001685289 | Credible Set | purple |
| chr8:124487999 | 8   | 124.4880 | 0.001859850 | Credible Set | purple |
| chr8:124510054 | 8   | 124.5101 | 0.001757004 | Credible Set | purple |
| chr8:124520576 | 8   | 124.5206 | 0.001755578 | Credible Set | purple |
| chr8:124520641 | 8   | 124.5206 | 0.001765541 | Credible Set | purple |
| chr8:124543418 | 8   | 124.5434 | 0.001763569 | Credible Set | purple |
| chr8:124563037 | 8   | 124.5630 | 0.001766275 | Credible Set | purple |
| chr8:124563111 | 8   | 124.5631 | 0.001763569 | Credible Set | purple |
| chr8:124563221 | 8   | 124.5632 | 0.001763569 | Credible Set | purple |
| chr8:124612523 | 8   | 124.6125 | 0.001492897 | Credible Set | purple |
| chr8:124705504 | 8   | 124.7055 | 0.001650005 | Credible Set | purple |
| chr8:124746311 | 8   | 124.7463 | 0.001893122 | Credible Set | purple |
| chr8:124777638 | 8   | 124.7776 | 0.002595270 | Credible Set | purple |
| chr8:124977284 | 8   | 124.9773 | 0.002787824 | Credible Set | purple |
| chr8:124977290 | 8   | 124.9773 | 0.002837849 | Credible Set | purple |
| chr8:124977353 | 8   | 124.9774 | 0.002955531 | Credible Set | purple |
| chr8:124979975 | 8   | 124.9800 | 0.002529348 | Credible Set | purple |
| chr8:124982183 | 8   | 124.9822 | 0.002892122 | Credible Set | purple |
| chr8:125088462 | 8   | 125.0885 | 0.003243641 | Credible Set | purple |
| chr8:125166834 | 8   | 125.1668 | 0.003794082 | Credible Set | purple |
| chr8:125175162 | 8   | 125.1752 | 0.002742517 | Credible Set | purple |
| chr8:125175172 | 8   | 125.1752 | 0.002755058 | Credible Set | purple |
| chr8:125175263 | 8   | 125.1753 | 0.004298180 | Credible Set | purple |
| chr8:125175309 | 8   | 125.1753 | 0.004334181 | Credible Set | purple |

## Fine-mapping Regions

| snp            | chr | pos (Mb) | pp          | group        | color  |
|----------------|-----|----------|-------------|--------------|--------|
| chr8:125175313 | 8   | 125.1753 | 0.004323931 | Credible Set | purple |
| chr8:125232862 | 8   | 125.2329 | 0.003950738 | Credible Set | purple |
| chr8:125232967 | 8   | 125.2330 | 0.003950738 | Credible Set | purple |
| chr8:125236805 | 8   | 125.2368 | 0.003835431 | Credible Set | purple |
| chr8:125244581 | 8   | 125.2446 | 0.003950738 | Credible Set | purple |
| chr8:125261827 | 8   | 125.2618 | 0.004009503 | Credible Set | purple |
| chr8:125271155 | 8   | 125.2712 | 0.002152626 | Credible Set | purple |
| chr8:125283686 | 8   | 125.2837 | 0.002462780 | Credible Set | purple |
| chr8:125283700 | 8   | 125.2837 | 0.002427817 | Credible Set | purple |
| chr8:125313378 | 8   | 125.3134 | 0.003960228 | Credible Set | purple |
| chr8:125327590 | 8   | 125.3276 | 0.003962498 | Credible Set | purple |
| chr8:125327926 | 8   | 125.3279 | 0.003932665 | Credible Set | purple |
| chr8:125328592 | 8   | 125.3286 | 0.005002569 | Credible Set | purple |
| chr8:125337596 | 8   | 125.3376 | 0.003956013 | Credible Set | purple |
| chr8:125339832 | 8   | 125.3398 | 0.004043053 | Credible Set | purple |
| chr8:125339948 | 8   | 125.3399 | 0.004403995 | Credible Set | purple |
| chr8:125352885 | 8   | 125.3529 | 0.003950738 | Credible Set | purple |
| chr8:125357050 | 8   | 125.3571 | 0.004153951 | Credible Set | purple |
| chr8:125357070 | 8   | 125.3571 | 0.003992568 | Credible Set | purple |
| chr8:125357611 | 8   | 125.3576 | 0.007998043 | Credible Set | purple |
| chr8:125357613 | 8   | 125.3576 | 0.008011698 | Credible Set | purple |
| chr8:125357664 | 8   | 125.3577 | 0.007290025 | Credible Set | purple |
| chr8:125358000 | 8   | 125.3580 | 0.003948422 | Credible Set | purple |
| chr8:125381350 | 8   | 125.3813 | 0.003950738 | Credible Set | purple |
| chr8:125381413 | 8   | 125.3814 | 0.003983447 | Credible Set | purple |
| chr8:125381419 | 8   | 125.3814 | 0.003983447 | Credible Set | purple |
| chr8:125381501 | 8   | 125.3815 | 0.006456504 | Credible Set | purple |
| chr8:125381543 | 8   | 125.3815 | 0.006588992 | Credible Set | purple |
| chr8:125402101 | 8   | 125.4021 | 0.003438611 | Credible Set | purple |
| chr8:125402104 | 8   | 125.4021 | 0.003367583 | Credible Set | purple |
| chr8:125413718 | 8   | 125.4137 | 0.003950738 | Credible Set | purple |
| chr8:125418482 | 8   | 125.4185 | 0.003950738 | Credible Set | purple |
| chr8:125418672 | 8   | 125.4187 | 0.003950738 | Credible Set | purple |
| chr8:125418880 | 8   | 125.4189 | 0.003950738 | Credible Set | purple |
| chr8:125424267 | 8   | 125.4243 | 0.003892193 | Credible Set | purple |
| chr8:125431865 | 8   | 125.4319 | 0.002928213 | Credible Set | purple |

## Fine-mapping Regions

| snp            | chr | pos (Mb) | pp          | group        | color  |
|----------------|-----|----------|-------------|--------------|--------|
| chr8:125434348 | 8   | 125.4343 | 0.004035697 | Credible Set | purple |
| chr8:125434876 | 8   | 125.4349 | 0.003964326 | Credible Set | purple |
| chr8:125435327 | 8   | 125.4353 | 0.003969090 | Credible Set | purple |
| chr8:125435876 | 8   | 125.4359 | 0.003944932 | Credible Set | purple |
| chr8:125442038 | 8   | 125.4420 | 0.005071274 | Credible Set | purple |
| chr8:125442845 | 8   | 125.4428 | 0.003941202 | Credible Set | purple |
| chr8:125445748 | 8   | 125.4457 | 0.003789302 | Credible Set | purple |
| chr8:125447109 | 8   | 125.4471 | 0.003928053 | Credible Set | purple |
| chr8:125470813 | 8   | 125.4708 | 0.003830442 | Credible Set | purple |
| chr8:125475610 | 8   | 125.4756 | 0.003947334 | Credible Set | purple |
| chr8:125490914 | 8   | 125.4909 | 0.003947334 | Credible Set | purple |
| chr8:125519869 | 8   | 125.5199 | 0.003947334 | Credible Set | purple |
| chr8:125532800 | 8   | 125.5328 | 0.003950738 | Credible Set | purple |
| chr8:125532879 | 8   | 125.5329 | 0.003950738 | Credible Set | purple |
| chr8:125535705 | 8   | 125.5357 | 0.005200027 | Credible Set | purple |
| chr8:125535715 | 8   | 125.5357 | 0.005188449 | Credible Set | purple |
| chr8:125536481 | 8   | 125.5365 | 0.004393031 | Credible Set | purple |
| chr8:125560754 | 8   | 125.5608 | 0.004745899 | Credible Set | purple |
| chr8:125576647 | 8   | 125.5766 | 0.004973082 | Credible Set | purple |
| chr8:125584598 | 8   | 125.5846 | 0.003112353 | Credible Set | purple |
| chr8:125584609 | 8   | 125.5846 | 0.004086251 | Credible Set | purple |
| chr8:125585107 | 8   | 125.5851 | 0.004664570 | Credible Set | purple |
| chr8:125602298 | 8   | 125.6023 | 0.004606692 | Credible Set | purple |
| chr8:125621974 | 8   | 125.6220 | 0.004828224 | Credible Set | purple |
| chr8:125645785 | 8   | 125.6458 | 0.004040086 | Credible Set | purple |
| chr8:125645803 | 8   | 125.6458 | 0.004040086 | Credible Set | purple |
| chr8:125686823 | 8   | 125.6868 | 0.005324217 | Credible Set | purple |
| chr8:125689213 | 8   | 125.6892 | 0.005092299 | Credible Set | purple |
| chr8:125689398 | 8   | 125.6894 | 0.005096822 | Credible Set | purple |
| chr8:125691437 | 8   | 125.6914 | 0.001702796 | Credible Set | purple |
| chr8:125697075 | 8   | 125.6971 | 0.003270429 | Credible Set | purple |
| chr8:125705281 | 8   | 125.7053 | 0.004040400 | Credible Set | purple |
| chr8:125705285 | 8   | 125.7053 | 0.003828675 | Credible Set | purple |
| chr8:125705796 | 8   | 125.7058 | 0.004714132 | Credible Set | purple |
| chr8:125712995 | 8   | 125.7130 | 0.010388986 | Credible Set | purple |
| chr8:125712999 | 8   | 125.7130 | 0.010446069 | Credible Set | purple |



Fine-mapping Regions

| snp            | chr | pos (Mb) | pp          | group        | color  |
|----------------|-----|----------|-------------|--------------|--------|
| chr8:125713002 | 8   | 125.7130 | 0.010312410 | Credible Set | purple |
| chr8:125713148 | 8   | 125.7131 | 0.004560446 | Credible Set | purple |
| chr8:126045228 | 8   | 126.0452 | 0.046640253 | Credible Set | purple |
| chr8:126176719 | 8   | 126.1767 | 0.200755065 | Credible Set | purple |
| chr8:126176728 | 8   | 126.1767 | 0.202885381 | Credible Set | purple |
| chr8:126176792 | 8   | 126.1768 | 0.054057454 | Credible Set | purple |
| chr8:126176848 | 8   | 126.1768 | 0.044585097 | Credible Set | purple |
| chr8:126193117 | 8   | 126.1931 | 0.009681698 | Credible Set | purple |
| chr8:126193126 | 8   | 126.1931 | 0.009858927 | Credible Set | purple |
| chr8:126193186 | 8   | 126.1932 | 0.009338563 | Credible Set | purple |

F34 GBS, retic parameters reticulocyte percent

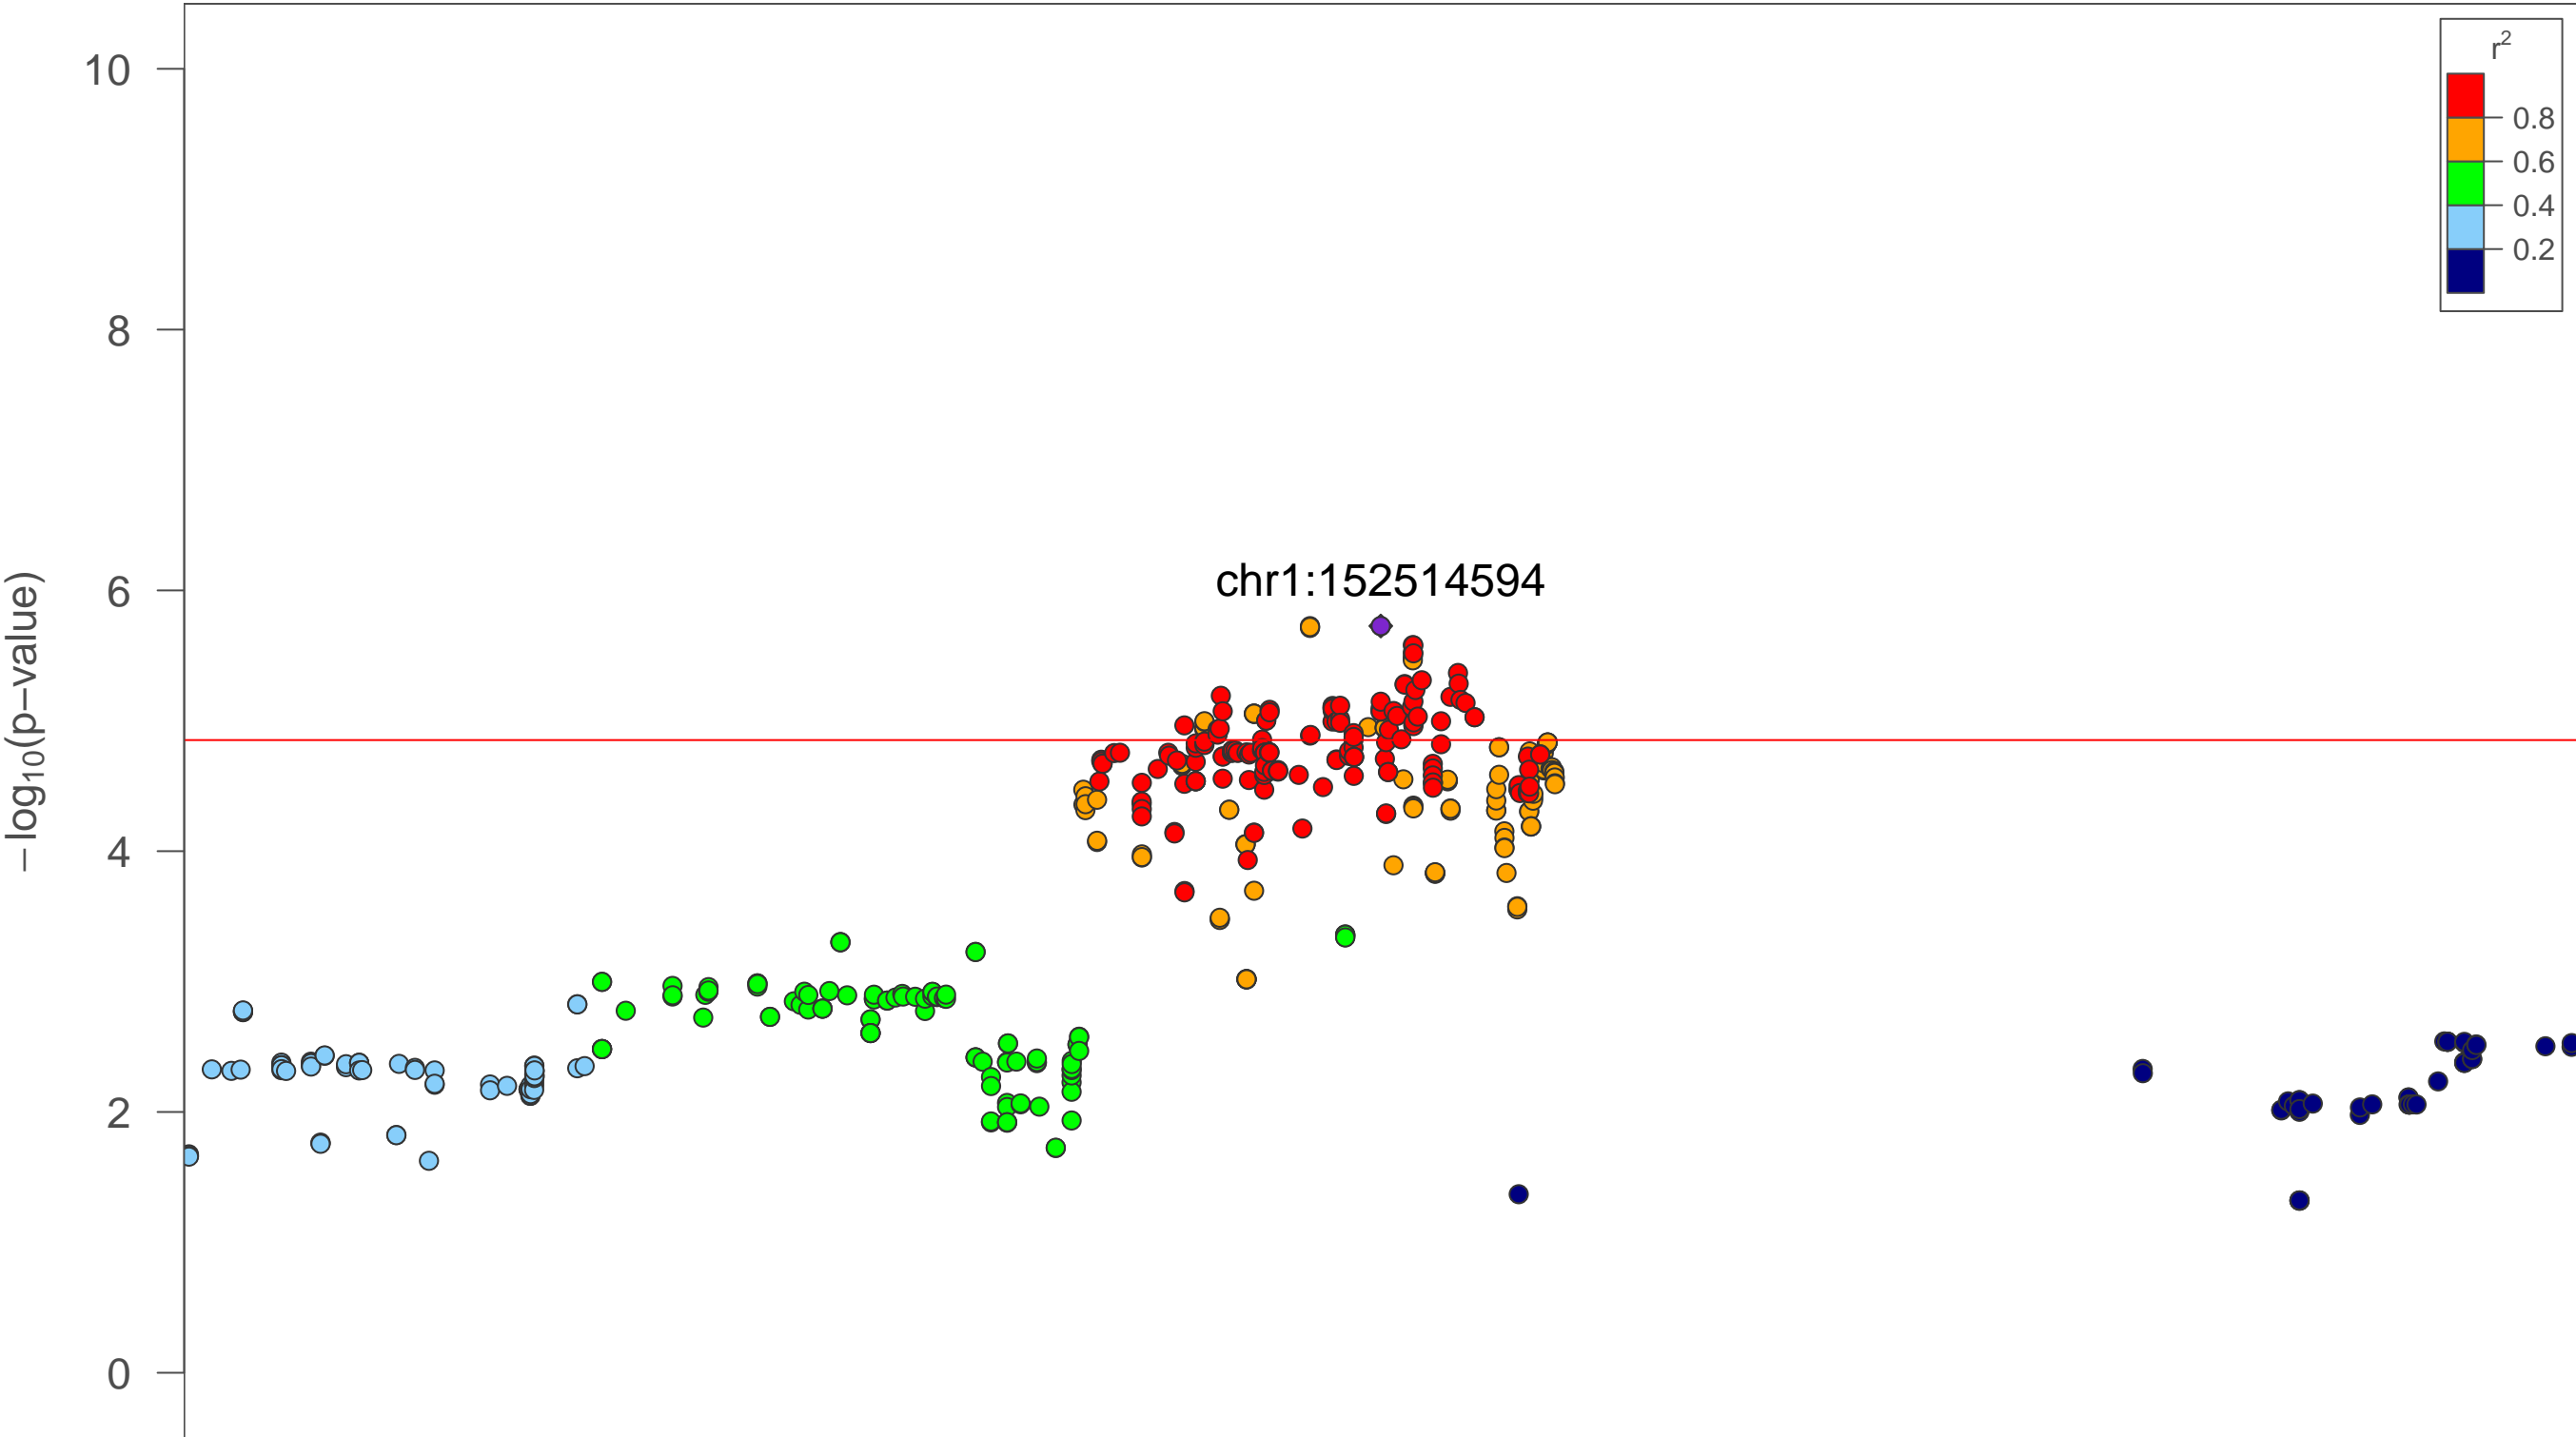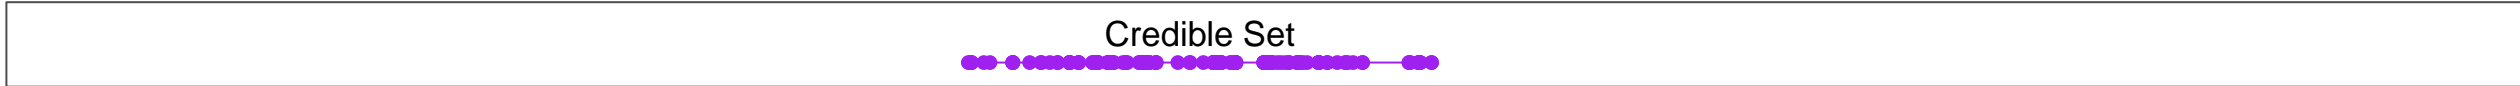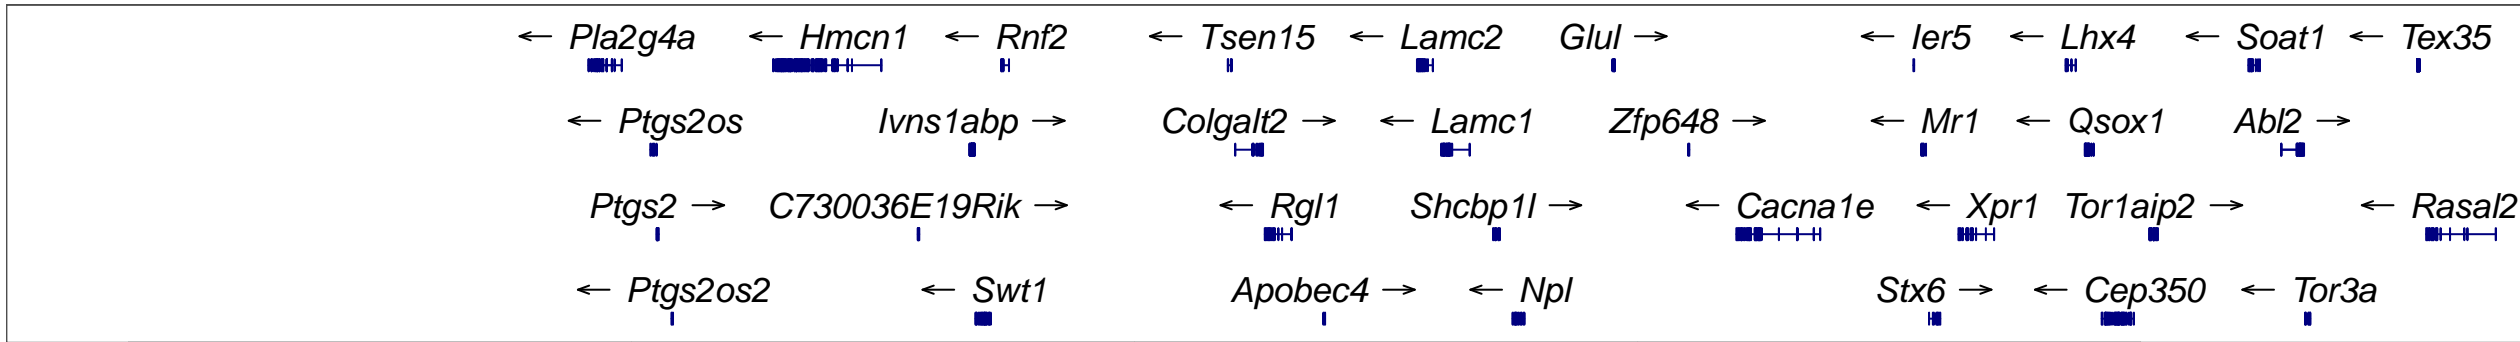

39 genes  
omitted

date: Thu Oct 25 17:04:13 2018

build: F34GBS

display range: chr1:147514594–157514594 [147514594–157514594]

hilite range: 0 – 0 [ 0 – 0 ]

reference SNP: chr1:152514594

number of SNPs plotted: 499

min P-value: 1.88E–6 [chr1:152514594]

max P-value: 4.8E–2 [chr1:156353025]

omitted Genes: Pdc, 2310030A07Rik, BC003331

omitted Genes: Tpr, Prg4, Trmt1l

omitted Genes: Mir7682, Fam129a, Edem3

omitted Genes: 1700025G04Rik, Arpc5, Ncf2

omitted Genes: Smg7, Nmnat2, E330020D12Rik

omitted Genes: Dhx9, Rgs8, C230024C17Rik

omitted Genes: Rgs16, Rnasel, Rgs1

omitted Genes: Teddm2, Teddm1b, Teddm1a

omitted Genes: Mir8114, 4930452N14Rik, 4930532M18Rik

omitted Genes: Gm5532, Acbd6, Tor1aip1

omitted Genes: Fam163a, Tdrd5, Nphs2

omitted Genes: Fam20b, Ralgps2, Angptl1

omitted Genes: 2810025M15Rik, BC026585, Sec16b

## Fine-mapping Regions

| snp            | chr | pos (Mb) | pp          | group        | color  |
|----------------|-----|----------|-------------|--------------|--------|
| chr1:151339098 | 1   | 151.3391 | 0.002896438 | Credible Set | purple |
| chr1:151346919 | 1   | 151.3469 | 0.004173767 | Credible Set | purple |
| chr1:151346950 | 1   | 151.3469 | 0.004050923 | Credible Set | purple |
| chr1:151351933 | 1   | 151.3519 | 0.003903870 | Credible Set | purple |
| chr1:151352397 | 1   | 151.3524 | 0.003897974 | Credible Set | purple |
| chr1:151400733 | 1   | 151.4007 | 0.004666141 | Credible Set | purple |
| chr1:151424994 | 1   | 151.4250 | 0.004691589 | Credible Set | purple |
| chr1:151515546 | 1   | 151.5155 | 0.001985201 | Credible Set | purple |
| chr1:151515567 | 1   | 151.5156 | 0.002067244 | Credible Set | purple |
| chr1:151516022 | 1   | 151.5160 | 0.001823672 | Credible Set | purple |
| chr1:151516157 | 1   | 151.5162 | 0.002830805 | Credible Set | purple |
| chr1:151582944 | 1   | 151.5829 | 0.003570811 | Credible Set | purple |
| chr1:151626734 | 1   | 151.6267 | 0.004691589 | Credible Set | purple |
| chr1:151630091 | 1   | 151.6301 | 0.004466706 | Credible Set | purple |
| chr1:151663201 | 1   | 151.6632 | 0.004119639 | Credible Set | purple |
| chr1:151693985 | 1   | 151.6940 | 0.002783331 | Credible Set | purple |
| chr1:151694036 | 1   | 151.6940 | 0.007437689 | Credible Set | purple |
| chr1:151741376 | 1   | 151.7414 | 0.004027916 | Credible Set | purple |
| chr1:151741404 | 1   | 151.7414 | 0.002907849 | Credible Set | purple |
| chr1:151741409 | 1   | 151.7414 | 0.002907849 | Credible Set | purple |
| chr1:151741410 | 1   | 151.7414 | 0.002902968 | Credible Set | purple |
| chr1:151741413 | 1   | 151.7414 | 0.002907849 | Credible Set | purple |
| chr1:151741477 | 1   | 151.7415 | 0.005100188 | Credible Set | purple |
| chr1:151741478 | 1   | 151.7415 | 0.005491751 | Credible Set | purple |
| chr1:151777225 | 1   | 151.7772 | 0.005626348 | Credible Set | purple |
| chr1:151777722 | 1   | 151.7777 | 0.005341084 | Credible Set | purple |
| chr1:151777765 | 1   | 151.7778 | 0.005657913 | Credible Set | purple |
| chr1:151832714 | 1   | 151.8327 | 0.006949675 | Credible Set | purple |
| chr1:151832824 | 1   | 151.8328 | 0.006358324 | Credible Set | purple |
| chr1:151841655 | 1   | 151.8417 | 0.007041982 | Credible Set | purple |
| chr1:151846455 | 1   | 151.8465 | 0.012261176 | Credible Set | purple |
| chr1:151854124 | 1   | 151.8541 | 0.009435657 | Credible Set | purple |
| chr1:151854136 | 1   | 151.8541 | 0.003033152 | Credible Set | purple |
| chr1:151854478 | 1   | 151.8545 | 0.004411419 | Credible Set | purple |
| chr1:151854533 | 1   | 151.8545 | 0.004394856 | Credible Set | purple |
| chr1:151893115 | 1   | 151.8931 | 0.004691589 | Credible Set | purple |

## Fine-mapping Regions

| snp            | chr | pos (Mb) | pp          | group        | color  |
|----------------|-----|----------|-------------|--------------|--------|
| chr1:151893154 | 1   | 151.8932 | 0.004691589 | Credible Set | purple |
| chr1:151893169 | 1   | 151.8932 | 0.004876621 | Credible Set | purple |
| chr1:151896769 | 1   | 151.8968 | 0.004891800 | Credible Set | purple |
| chr1:151907336 | 1   | 151.9073 | 0.004865930 | Credible Set | purple |
| chr1:151916998 | 1   | 151.9170 | 0.004691589 | Credible Set | purple |
| chr1:151917004 | 1   | 151.9170 | 0.004691589 | Credible Set | purple |
| chr1:151953861 | 1   | 151.9539 | 0.004720731 | Credible Set | purple |
| chr1:151963849 | 1   | 151.9638 | 0.002965971 | Credible Set | purple |
| chr1:151964084 | 1   | 151.9641 | 0.004551512 | Credible Set | purple |
| chr1:151971418 | 1   | 151.9714 | 0.004691589 | Credible Set | purple |
| chr1:152018151 | 1   | 152.0182 | 0.004898524 | Credible Set | purple |
| chr1:152018723 | 1   | 152.0187 | 0.005853185 | Credible Set | purple |
| chr1:152019427 | 1   | 152.0194 | 0.005074529 | Credible Set | purple |
| chr1:152027497 | 1   | 152.0275 | 0.002520202 | Credible Set | purple |
| chr1:152027513 | 1   | 152.0275 | 0.003226878 | Credible Set | purple |
| chr1:152027772 | 1   | 152.0278 | 0.003402495 | Credible Set | purple |
| chr1:152030727 | 1   | 152.0307 | 0.004691589 | Credible Set | purple |
| chr1:152030740 | 1   | 152.0307 | 0.004691589 | Credible Set | purple |
| chr1:152030750 | 1   | 152.0308 | 0.004691589 | Credible Set | purple |
| chr1:152030755 | 1   | 152.0308 | 0.004691589 | Credible Set | purple |
| chr1:152030782 | 1   | 152.0308 | 0.003791684 | Credible Set | purple |
| chr1:152035922 | 1   | 152.0359 | 0.008054665 | Credible Set | purple |
| chr1:152035925 | 1   | 152.0359 | 0.008056079 | Credible Set | purple |
| chr1:152047326 | 1   | 152.0473 | 0.004699510 | Credible Set | purple |
| chr1:152049281 | 1   | 152.0493 | 0.004747493 | Credible Set | purple |
| chr1:152049576 | 1   | 152.0496 | 0.004709191 | Credible Set | purple |
| chr1:152050080 | 1   | 152.0501 | 0.009673176 | Credible Set | purple |
| chr1:152050132 | 1   | 152.0501 | 0.009271428 | Credible Set | purple |
| chr1:152060153 | 1   | 152.0602 | 0.003487767 | Credible Set | purple |
| chr1:152060186 | 1   | 152.0602 | 0.003468602 | Credible Set | purple |
| chr1:152085317 | 1   | 152.0853 | 0.003414125 | Credible Set | purple |
| chr1:152085323 | 1   | 152.0853 | 0.003507709 | Credible Set | purple |
| chr1:152085887 | 1   | 152.0859 | 0.003446032 | Credible Set | purple |
| chr1:152172042 | 1   | 152.1720 | 0.003232799 | Credible Set | purple |
| chr1:152219150 | 1   | 152.2192 | 0.006258417 | Credible Set | purple |
| chr1:152221047 | 1   | 152.2210 | 0.006330232 | Credible Set | purple |

## Fine-mapping Regions

| snp            | chr | pos (Mb) | pp          | group        | color  |
|----------------|-----|----------|-------------|--------------|--------|
| chr1:152273304 | 1   | 152.2733 | 0.002635169 | Credible Set | purple |
| chr1:152312984 | 1   | 152.3130 | 0.007935417 | Credible Set | purple |
| chr1:152313303 | 1   | 152.3133 | 0.010321796 | Credible Set | purple |
| chr1:152313315 | 1   | 152.3133 | 0.009863235 | Credible Set | purple |
| chr1:152313427 | 1   | 152.3134 | 0.010165857 | Credible Set | purple |
| chr1:152313450 | 1   | 152.3134 | 0.009950365 | Credible Set | purple |
| chr1:152313626 | 1   | 152.3136 | 0.009508917 | Credible Set | purple |
| chr1:152313656 | 1   | 152.3137 | 0.009863648 | Credible Set | purple |
| chr1:152329709 | 1   | 152.3297 | 0.004194085 | Credible Set | purple |
| chr1:152329711 | 1   | 152.3297 | 0.004150873 | Credible Set | purple |
| chr1:152330012 | 1   | 152.3300 | 0.007932320 | Credible Set | purple |
| chr1:152344680 | 1   | 152.3447 | 0.008269548 | Credible Set | purple |
| chr1:152344704 | 1   | 152.3447 | 0.010358700 | Credible Set | purple |
| chr1:152345178 | 1   | 152.3452 | 0.007767833 | Credible Set | purple |
| chr1:152382093 | 1   | 152.3821 | 0.004450088 | Credible Set | purple |
| chr1:152382197 | 1   | 152.3822 | 0.004841214 | Credible Set | purple |
| chr1:152400891 | 1   | 152.4009 | 0.005853289 | Credible Set | purple |
| chr1:152401044 | 1   | 152.4010 | 0.005123119 | Credible Set | purple |
| chr1:152401140 | 1   | 152.4011 | 0.006527809 | Credible Set | purple |
| chr1:152401179 | 1   | 152.4012 | 0.006118288 | Credible Set | purple |
| chr1:152401759 | 1   | 152.4018 | 0.003179731 | Credible Set | purple |
| chr1:152402888 | 1   | 152.4029 | 0.004367868 | Credible Set | purple |
| chr1:152402907 | 1   | 152.4029 | 0.004367868 | Credible Set | purple |
| chr1:152402941 | 1   | 152.4029 | 0.004367868 | Credible Set | purple |
| chr1:152513693 | 1   | 152.5137 | 0.009901076 | Credible Set | purple |
| chr1:152513781 | 1   | 152.5138 | 0.009373920 | Credible Set | purple |
| chr1:152514271 | 1   | 152.5143 | 0.009403894 | Credible Set | purple |
| chr1:152514375 | 1   | 152.5144 | 0.011093062 | Credible Set | purple |
| chr1:152514594 | 1   | 152.5146 | 0.039929574 | Credible Set | purple |
| chr1:152514647 | 1   | 152.5146 | 0.039832481 | Credible Set | purple |
| chr1:152531770 | 1   | 152.5318 | 0.004235411 | Credible Set | purple |
| chr1:152536828 | 1   | 152.5368 | 0.001677710 | Credible Set | purple |
| chr1:152536849 | 1   | 152.5368 | 0.001694258 | Credible Set | purple |
| chr1:152536958 | 1   | 152.5370 | 0.005604155 | Credible Set | purple |
| chr1:152545294 | 1   | 152.5453 | 0.003390846 | Credible Set | purple |
| chr1:152545312 | 1   | 152.5453 | 0.003390846 | Credible Set | purple |

## Fine-mapping Regions

| snp            | chr | pos (Mb) | pp          | group        | color  |
|----------------|-----|----------|-------------|--------------|--------|
| chr1:152548725 | 1   | 152.5487 | 0.006900719 | Credible Set | purple |
| chr1:152568046 | 1   | 152.5680 | 0.009478547 | Credible Set | purple |
| chr1:152582751 | 1   | 152.5828 | 0.008722077 | Credible Set | purple |
| chr1:152600723 | 1   | 152.6007 | 0.005880718 | Credible Set | purple |
| chr1:152614121 | 1   | 152.6141 | 0.014948522 | Credible Set | purple |
| chr1:152614133 | 1   | 152.6141 | 0.014797893 | Credible Set | purple |
| chr1:152644575 | 1   | 152.6446 | 0.010114633 | Credible Set | purple |
| chr1:152650776 | 1   | 152.6508 | 0.007548897 | Credible Set | purple |
| chr1:152650892 | 1   | 152.6509 | 0.007345767 | Credible Set | purple |
| chr1:152650962 | 1   | 152.6510 | 0.011127781 | Credible Set | purple |
| chr1:152650976 | 1   | 152.6510 | 0.028765589 | Credible Set | purple |
| chr1:152651016 | 1   | 152.6510 | 0.025133576 | Credible Set | purple |
| chr1:152651777 | 1   | 152.6518 | 0.007821710 | Credible Set | purple |
| chr1:152659220 | 1   | 152.6592 | 0.013518611 | Credible Set | purple |
| chr1:152669121 | 1   | 152.6691 | 0.008623833 | Credible Set | purple |
| chr1:152685949 | 1   | 152.6859 | 0.015942450 | Credible Set | purple |
| chr1:152731898 | 1   | 152.7319 | 0.003892579 | Credible Set | purple |
| chr1:152731899 | 1   | 152.7319 | 0.003604457 | Credible Set | purple |
| chr1:152731910 | 1   | 152.7319 | 0.003205477 | Credible Set | purple |
| chr1:152732468 | 1   | 152.7325 | 0.002820924 | Credible Set | purple |
| chr1:152732477 | 1   | 152.7325 | 0.002848003 | Credible Set | purple |
| chr1:152732522 | 1   | 152.7325 | 0.002607363 | Credible Set | purple |
| chr1:152766369 | 1   | 152.7664 | 0.007971496 | Credible Set | purple |
| chr1:152766418 | 1   | 152.7664 | 0.005413035 | Credible Set | purple |
| chr1:152805855 | 1   | 152.8059 | 0.012036101 | Credible Set | purple |
| chr1:152837203 | 1   | 152.8372 | 0.018034009 | Credible Set | purple |
| chr1:152840027 | 1   | 152.8400 | 0.015050244 | Credible Set | purple |
| chr1:152847662 | 1   | 152.8477 | 0.011433616 | Credible Set | purple |
| chr1:152868708 | 1   | 152.8687 | 0.010864872 | Credible Set | purple |
| chr1:152906391 | 1   | 152.9064 | 0.008534767 | Credible Set | purple |
| chr1:152906398 | 1   | 152.9064 | 0.008530725 | Credible Set | purple |
| chr1:153091176 | 1   | 153.0912 | 0.002688364 | Credible Set | purple |
| chr1:153091194 | 1   | 153.0912 | 0.002722811 | Credible Set | purple |
| chr1:153096224 | 1   | 153.0962 | 0.002384013 | Credible Set | purple |
| chr1:153128621 | 1   | 153.1286 | 0.002474947 | Credible Set | purple |
| chr1:153129186 | 1   | 153.1292 | 0.002387507 | Credible Set | purple |

Fine-mapping Regions

| snp            | chr | pos (Mb) | pp          | group        | color  |
|----------------|-----|----------|-------------|--------------|--------|
| chr1:153129276 | 1   | 153.1293 | 0.004400066 | Credible Set | purple |
| chr1:153134434 | 1   | 153.1344 | 0.002371447 | Credible Set | purple |
| chr1:153134521 | 1   | 153.1345 | 0.003527590 | Credible Set | purple |
| chr1:153136723 | 1   | 153.1367 | 0.002653707 | Credible Set | purple |
| chr1:153180646 | 1   | 153.1806 | 0.004571288 | Credible Set | purple |
| chr1:153180739 | 1   | 153.1807 | 0.004551653 | Credible Set | purple |



# F34 GBS, retic parameters concentration of hemoglobin in reticulocytes

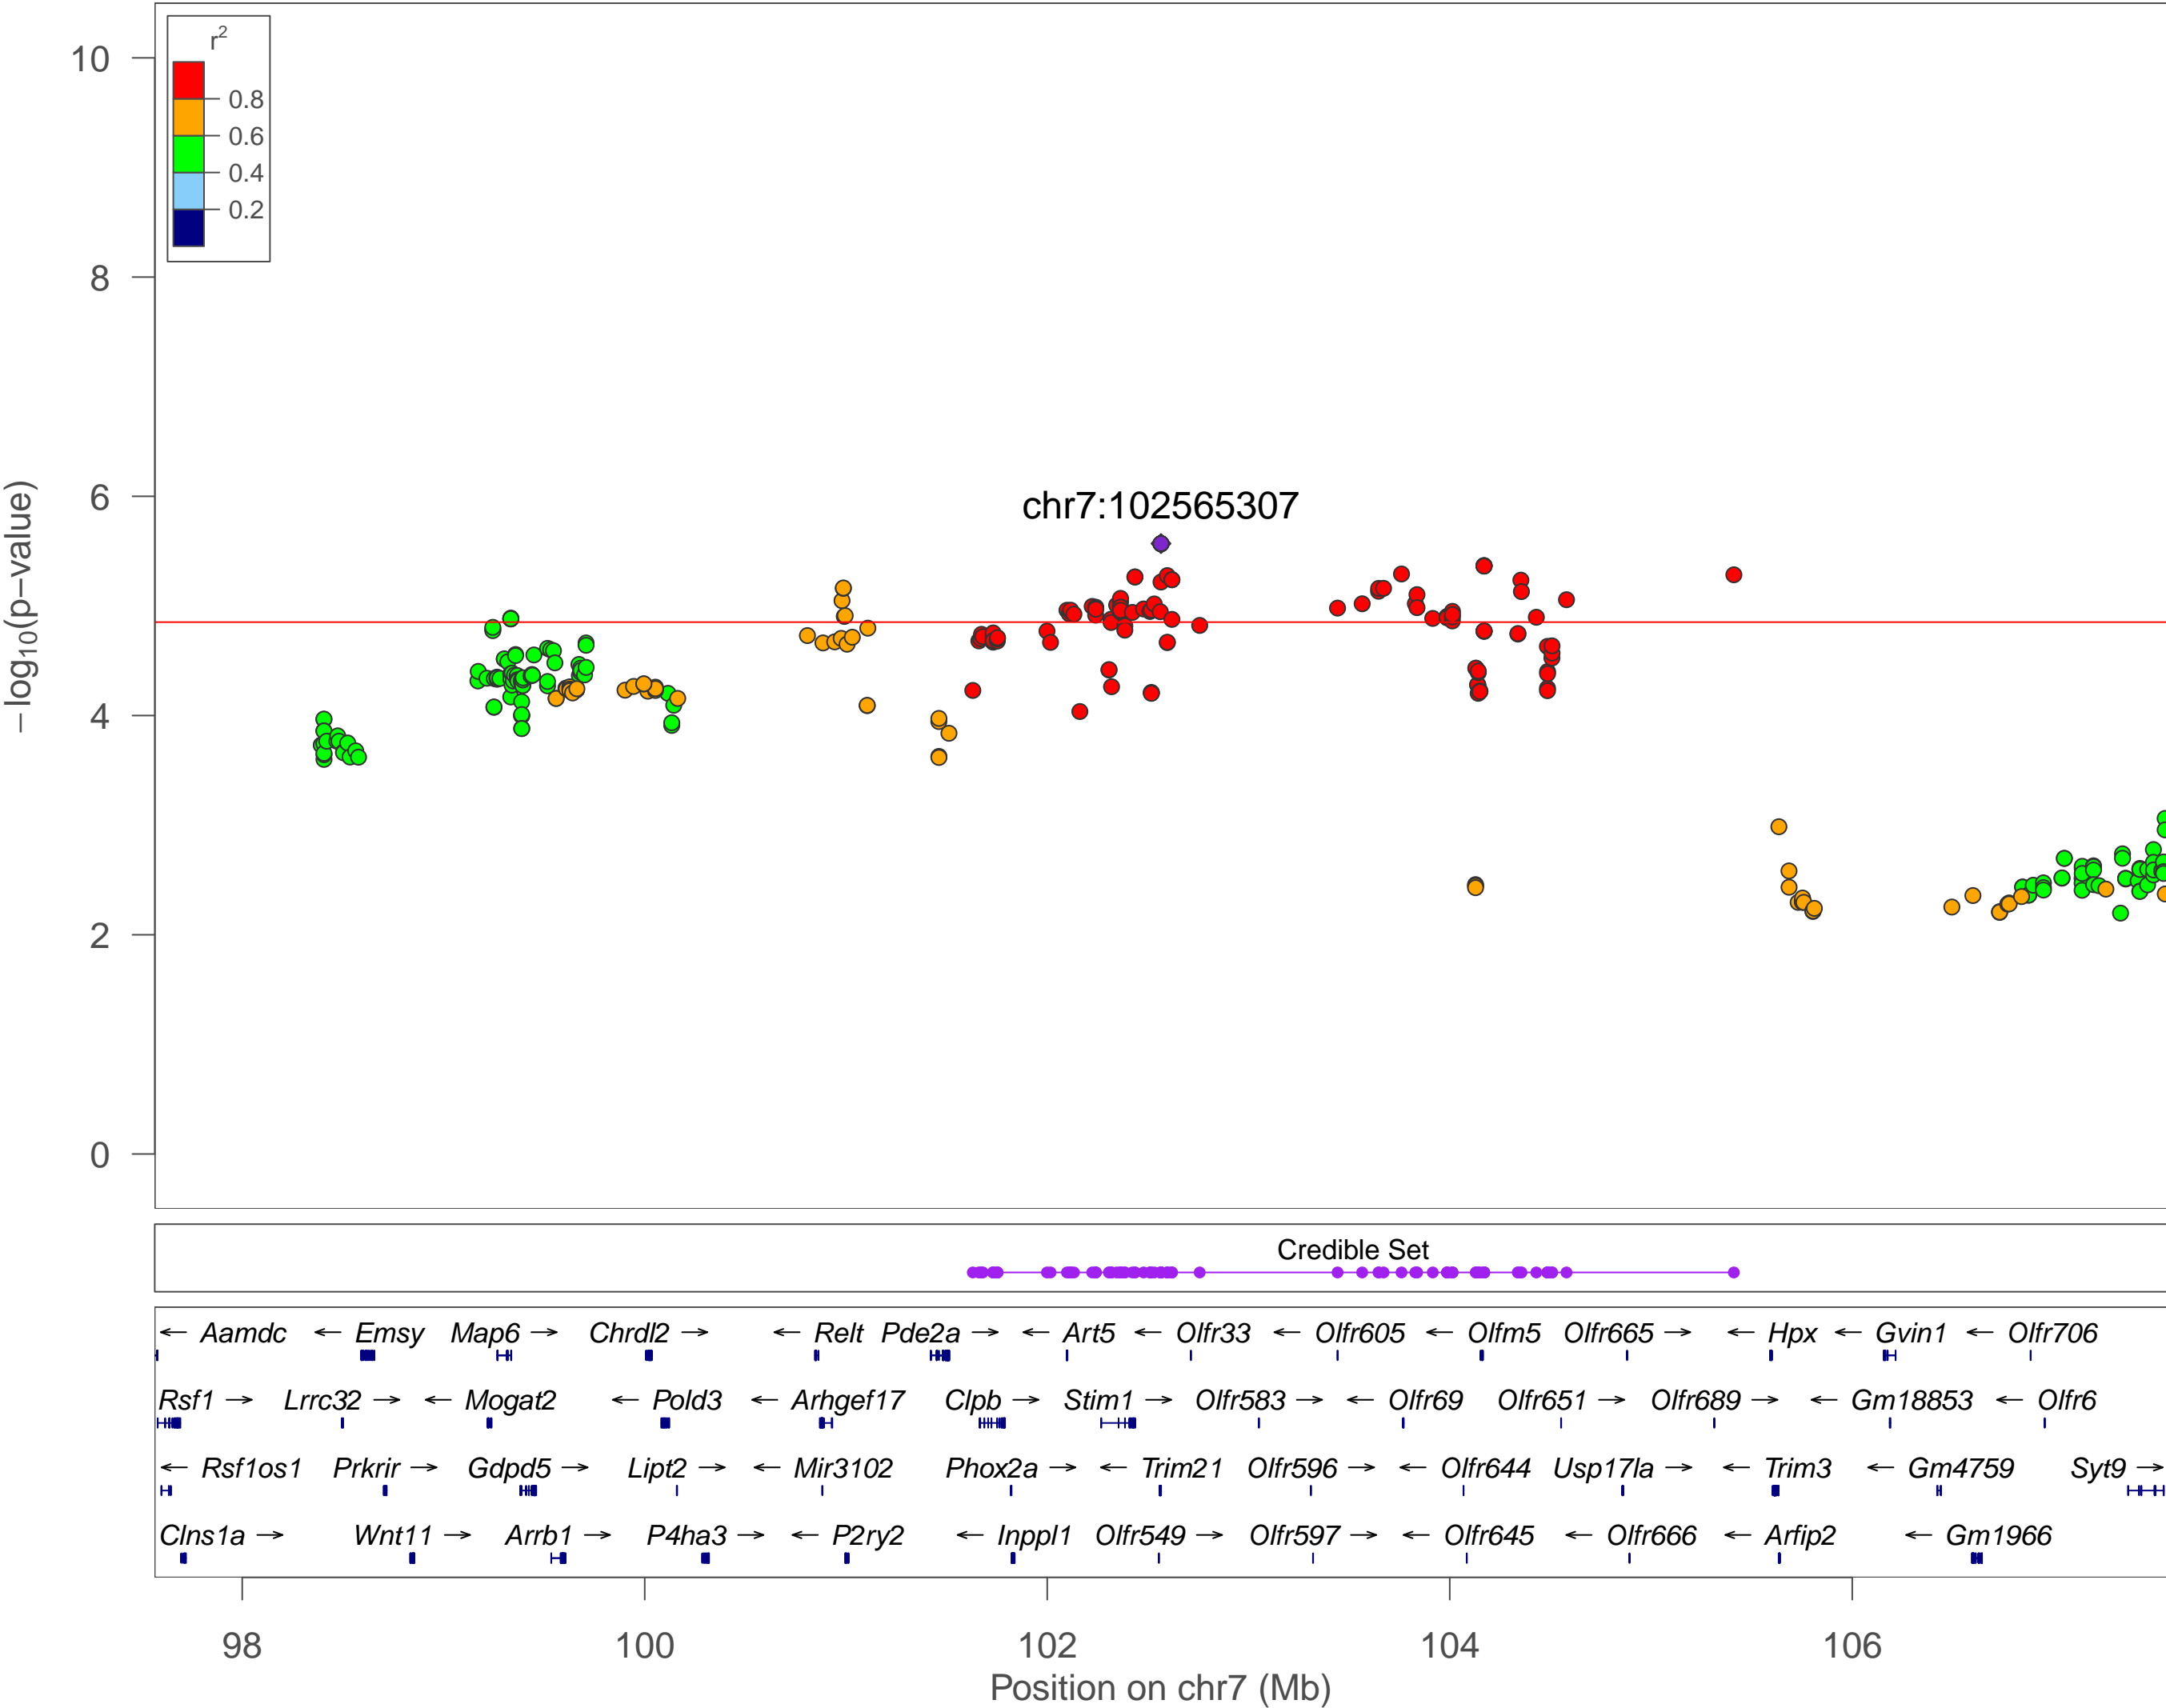

date: Thu Oct 25 17:04:37 2018

build: F34GBS

display range: chr7:97565307–107565307 [97565307–107565307]

hilite range: 0 – 0 [ 0 – 0 ]

reference SNP: chr7:102565307

number of SNPs plotted: 328

min P-value: 2.7E–6 [chr7:102565307]

max P-value: 6.35E–3 [chr7:107333153]

omitted Genes: Aqp11, Pak1, Gdpd4

omitted Genes: Myo7a, Capn5, Omp

omitted Genes: Gm16938, B3gnt6, Acer3

omitted Genes: Tsku, Gucy2d, Uvrag

omitted Genes: Dgat2, Gm26705, Serpinh1

omitted Genes: Kihl35, Rps3, Snord15b

omitted Genes: Snord15a, Mir326, Tpbgl

omitted Genes: Slco2b1, Olfr520, Olfr521

omitted Genes: Neu3, Spcs2, Xrra1

omitted Genes: Rnf169, Kcne3, Pgm2l1

omitted Genes: Gpx2-ps1, Ppme1, C2cd3

omitted Genes: Ucp3, Ucp2, Dnajb13

omitted Genes: Coa4, Mrpl48, Rab6a

omitted Genes: Plekhhb1, Fam168a, P2ry6

omitted Genes: Fchsd2, Atg16l2, Stard10

omitted Genes: Arap1, Mir139, Art2a-ps

omitted Genes: Art2b, Folr2, Folr1

omitted Genes: Anapc15, Tomt, Lamtor1

omitted Genes: Lrrc51, Numa1, Il18bp

omitted Genes: Rnf121, Xndc1, Xntrpc

omitted Genes: Trpc2, Art1, Chrna10

omitted Genes: Nup98, Pgap2, Rhog

omitted Genes: Rrm1, Olfr543, Olfr544

omitted Genes: Olfr545, Olfr547, Olfr550

omitted Genes: Olfr551, Olfr552, Olfr553

omitted Genes: Olfr554, Olfr555, Olfr556

omitted Genes: Trim68, Olfr557, Olfr558

omitted Genes: Olfr559, Olfr78, Olfr560

omitted Genes: Olfr561, Olfr564, Olfr566

omitted Genes: Olfr568, Olfr569, Olfr570

omitted Genes: Olfr571, Olfr572, Olfr573, Olfr574

omitted Genes: Olfr575, Olfr576, Olfr577

Make more plots at <http://csg.sph.umich.edu/locuszoom/>

## Fine-mapping Regions

| snp            | chr | pos (Mb) | pp          | group        | color  |
|----------------|-----|----------|-------------|--------------|--------|
| chr7:101630176 | 7   | 101.6302 | 0.001666218 | Credible Set | purple |
| chr7:101660383 | 7   | 101.6604 | 0.004478869 | Credible Set | purple |
| chr7:101669186 | 7   | 101.6692 | 0.004685483 | Credible Set | purple |
| chr7:101673483 | 7   | 101.6735 | 0.005106436 | Credible Set | purple |
| chr7:101680140 | 7   | 101.6801 | 0.004873251 | Credible Set | purple |
| chr7:101731061 | 7   | 101.7311 | 0.004366629 | Credible Set | purple |
| chr7:101731110 | 7   | 101.7311 | 0.004834470 | Credible Set | purple |
| chr7:101731130 | 7   | 101.7311 | 0.005250993 | Credible Set | purple |
| chr7:101731658 | 7   | 101.7317 | 0.004500023 | Credible Set | purple |
| chr7:101751790 | 7   | 101.7518 | 0.004464519 | Credible Set | purple |
| chr7:101752580 | 7   | 101.7526 | 0.004669091 | Credible Set | purple |
| chr7:101752971 | 7   | 101.7530 | 0.004775575 | Credible Set | purple |
| chr7:101998679 | 7   | 101.9987 | 0.005446458 | Credible Set | purple |
| chr7:102016307 | 7   | 102.0163 | 0.004346337 | Credible Set | purple |
| chr7:102098054 | 7   | 102.0981 | 0.008271975 | Credible Set | purple |
| chr7:102110109 | 7   | 102.1101 | 0.007713600 | Credible Set | purple |
| chr7:102110501 | 7   | 102.1105 | 0.007717741 | Credible Set | purple |
| chr7:102116318 | 7   | 102.1163 | 0.008094142 | Credible Set | purple |
| chr7:102116430 | 7   | 102.1164 | 0.008094142 | Credible Set | purple |
| chr7:102116478 | 7   | 102.1165 | 0.008281684 | Credible Set | purple |
| chr7:102132562 | 7   | 102.1326 | 0.007649262 | Credible Set | purple |
| chr7:102223396 | 7   | 102.2234 | 0.008932092 | Credible Set | purple |
| chr7:102240695 | 7   | 102.2407 | 0.007499838 | Credible Set | purple |
| chr7:102241191 | 7   | 102.2412 | 0.008790987 | Credible Set | purple |
| chr7:102241211 | 7   | 102.2412 | 0.008585367 | Credible Set | purple |
| chr7:102241212 | 7   | 102.2412 | 0.008450446 | Credible Set | purple |
| chr7:102306968 | 7   | 102.3070 | 0.002505706 | Credible Set | purple |
| chr7:102306978 | 7   | 102.3070 | 0.002523243 | Credible Set | purple |
| chr7:102317213 | 7   | 102.3172 | 0.006912562 | Credible Set | purple |
| chr7:102317246 | 7   | 102.3172 | 0.006473017 | Credible Set | purple |
| chr7:102319586 | 7   | 102.3196 | 0.001794277 | Credible Set | purple |
| chr7:102344970 | 7   | 102.3450 | 0.009168286 | Credible Set | purple |
| chr7:102363897 | 7   | 102.3639 | 0.008006639 | Credible Set | purple |
| chr7:102364204 | 7   | 102.3642 | 0.009810287 | Credible Set | purple |
| chr7:102364223 | 7   | 102.3642 | 0.010503286 | Credible Set | purple |
| chr7:102364315 | 7   | 102.3643 | 0.008789794 | Credible Set | purple |

## Fine-mapping Regions

| snp            | chr | pos (Mb) | pp          | group        | color  |
|----------------|-----|----------|-------------|--------------|--------|
| chr7:102364326 | 7   | 102.3643 | 0.008789794 | Credible Set | purple |
| chr7:102364411 | 7   | 102.3644 | 0.008263564 | Credible Set | purple |
| chr7:102385520 | 7   | 102.3855 | 0.006047459 | Credible Set | purple |
| chr7:102385536 | 7   | 102.3855 | 0.005554218 | Credible Set | purple |
| chr7:102423165 | 7   | 102.4232 | 0.007919867 | Credible Set | purple |
| chr7:102435692 | 7   | 102.4357 | 0.016139724 | Credible Set | purple |
| chr7:102435720 | 7   | 102.4357 | 0.016139724 | Credible Set | purple |
| chr7:102478469 | 7   | 102.4785 | 0.008488158 | Credible Set | purple |
| chr7:102510475 | 7   | 102.5105 | 0.008124566 | Credible Set | purple |
| chr7:102510607 | 7   | 102.5106 | 0.008083571 | Credible Set | purple |
| chr7:102516878 | 7   | 102.5169 | 0.008314005 | Credible Set | purple |
| chr7:102531652 | 7   | 102.5317 | 0.009387117 | Credible Set | purple |
| chr7:102561708 | 7   | 102.5617 | 0.008035262 | Credible Set | purple |
| chr7:102565262 | 7   | 102.5653 | 0.031563442 | Credible Set | purple |
| chr7:102565292 | 7   | 102.5653 | 0.031472204 | Credible Set | purple |
| chr7:102565307 | 7   | 102.5653 | 0.031602621 | Credible Set | purple |
| chr7:102565323 | 7   | 102.5653 | 0.031511275 | Credible Set | purple |
| chr7:102565329 | 7   | 102.5653 | 0.031511275 | Credible Set | purple |
| chr7:102565410 | 7   | 102.5654 | 0.014576406 | Credible Set | purple |
| chr7:102596442 | 7   | 102.5964 | 0.016595746 | Credible Set | purple |
| chr7:102596578 | 7   | 102.5966 | 0.004329223 | Credible Set | purple |
| chr7:102596636 | 7   | 102.5966 | 0.004357565 | Credible Set | purple |
| chr7:102619418 | 7   | 102.6194 | 0.015290632 | Credible Set | purple |
| chr7:102619431 | 7   | 102.6194 | 0.015253688 | Credible Set | purple |
| chr7:102619466 | 7   | 102.6195 | 0.006888519 | Credible Set | purple |
| chr7:102757499 | 7   | 102.7575 | 0.006102586 | Credible Set | purple |
| chr7:103442570 | 7   | 103.4426 | 0.008636898 | Credible Set | purple |
| chr7:103564836 | 7   | 103.5648 | 0.009421142 | Credible Set | purple |
| chr7:103646439 | 7   | 103.6464 | 0.012111876 | Credible Set | purple |
| chr7:103646709 | 7   | 103.6467 | 0.012830230 | Credible Set | purple |
| chr7:103671033 | 7   | 103.6710 | 0.012844440 | Credible Set | purple |
| chr7:103760301 | 7   | 103.7603 | 0.017133624 | Credible Set | purple |
| chr7:103829200 | 7   | 103.8292 | 0.009447507 | Credible Set | purple |
| chr7:103837099 | 7   | 103.8371 | 0.011322627 | Credible Set | purple |
| chr7:103837213 | 7   | 103.8372 | 0.008715849 | Credible Set | purple |
| chr7:103915503 | 7   | 103.9155 | 0.007023448 | Credible Set | purple |

## Fine-mapping Regions

| snp            | chr | pos (Mb) | pp          | group        | color  |
|----------------|-----|----------|-------------|--------------|--------|
| chr7:103986792 | 7   | 103.9868 | 0.007285178 | Credible Set | purple |
| chr7:103986795 | 7   | 103.9868 | 0.007285178 | Credible Set | purple |
| chr7:103986857 | 7   | 103.9869 | 0.007129979 | Credible Set | purple |
| chr7:103986860 | 7   | 103.9869 | 0.007129979 | Credible Set | purple |
| chr7:104012808 | 7   | 104.0128 | 0.006678759 | Credible Set | purple |
| chr7:104013370 | 7   | 104.0134 | 0.007235938 | Credible Set | purple |
| chr7:104013395 | 7   | 104.0134 | 0.008094198 | Credible Set | purple |
| chr7:104013467 | 7   | 104.0135 | 0.007587979 | Credible Set | purple |
| chr7:104129734 | 7   | 104.1297 | 0.002594766 | Credible Set | purple |
| chr7:104129736 | 7   | 104.1297 | 0.002594766 | Credible Set | purple |
| chr7:104138934 | 7   | 104.1389 | 0.001858189 | Credible Set | purple |
| chr7:104138936 | 7   | 104.1389 | 0.001865475 | Credible Set | purple |
| chr7:104138968 | 7   | 104.1390 | 0.001865475 | Credible Set | purple |
| chr7:104141705 | 7   | 104.1417 | 0.002378657 | Credible Set | purple |
| chr7:104141768 | 7   | 104.1418 | 0.002450029 | Credible Set | purple |
| chr7:104149893 | 7   | 104.1499 | 0.001648049 | Credible Set | purple |
| chr7:104170479 | 7   | 104.1705 | 0.020160451 | Credible Set | purple |
| chr7:104170506 | 7   | 104.1705 | 0.020225329 | Credible Set | purple |
| chr7:104170518 | 7   | 104.1705 | 0.020295584 | Credible Set | purple |
| chr7:104170522 | 7   | 104.1705 | 0.020184594 | Credible Set | purple |
| chr7:104170543 | 7   | 104.1705 | 0.020080050 | Credible Set | purple |
| chr7:104170588 | 7   | 104.1706 | 0.005423359 | Credible Set | purple |
| chr7:104170594 | 7   | 104.1706 | 0.005434988 | Credible Set | purple |
| chr7:104170618 | 7   | 104.1706 | 0.005458156 | Credible Set | purple |
| chr7:104170662 | 7   | 104.1707 | 0.005458156 | Credible Set | purple |
| chr7:104338784 | 7   | 104.3388 | 0.005132344 | Credible Set | purple |
| chr7:104338810 | 7   | 104.3388 | 0.005188055 | Credible Set | purple |
| chr7:104353491 | 7   | 104.3535 | 0.015143062 | Credible Set | purple |
| chr7:104356230 | 7   | 104.3562 | 0.012025411 | Credible Set | purple |
| chr7:104430205 | 7   | 104.4302 | 0.007189441 | Credible Set | purple |
| chr7:104485236 | 7   | 104.4852 | 0.004012765 | Credible Set | purple |
| chr7:104485721 | 7   | 104.4857 | 0.001742260 | Credible Set | purple |
| chr7:104485727 | 7   | 104.4857 | 0.001658591 | Credible Set | purple |
| chr7:104486022 | 7   | 104.4860 | 0.002426149 | Credible Set | purple |
| chr7:104486041 | 7   | 104.4860 | 0.002328465 | Credible Set | purple |
| chr7:104507724 | 7   | 104.5077 | 0.003180216 | Credible Set | purple |

Fine-mapping Regions

| snp            | chr | pos (Mb) | pp          | group        | color  |
|----------------|-----|----------|-------------|--------------|--------|
| chr7:104508127 | 7   | 104.5081 | 0.003511477 | Credible Set | purple |
| chr7:104508173 | 7   | 104.5082 | 0.004054181 | Credible Set | purple |
| chr7:104580091 | 7   | 104.5801 | 0.010219445 | Credible Set | purple |
| chr7:105411752 | 7   | 105.4118 | 0.016860666 | Credible Set | purple |

# F34 GBS, retic parameters concentration of hemoglobin in reticulocytes

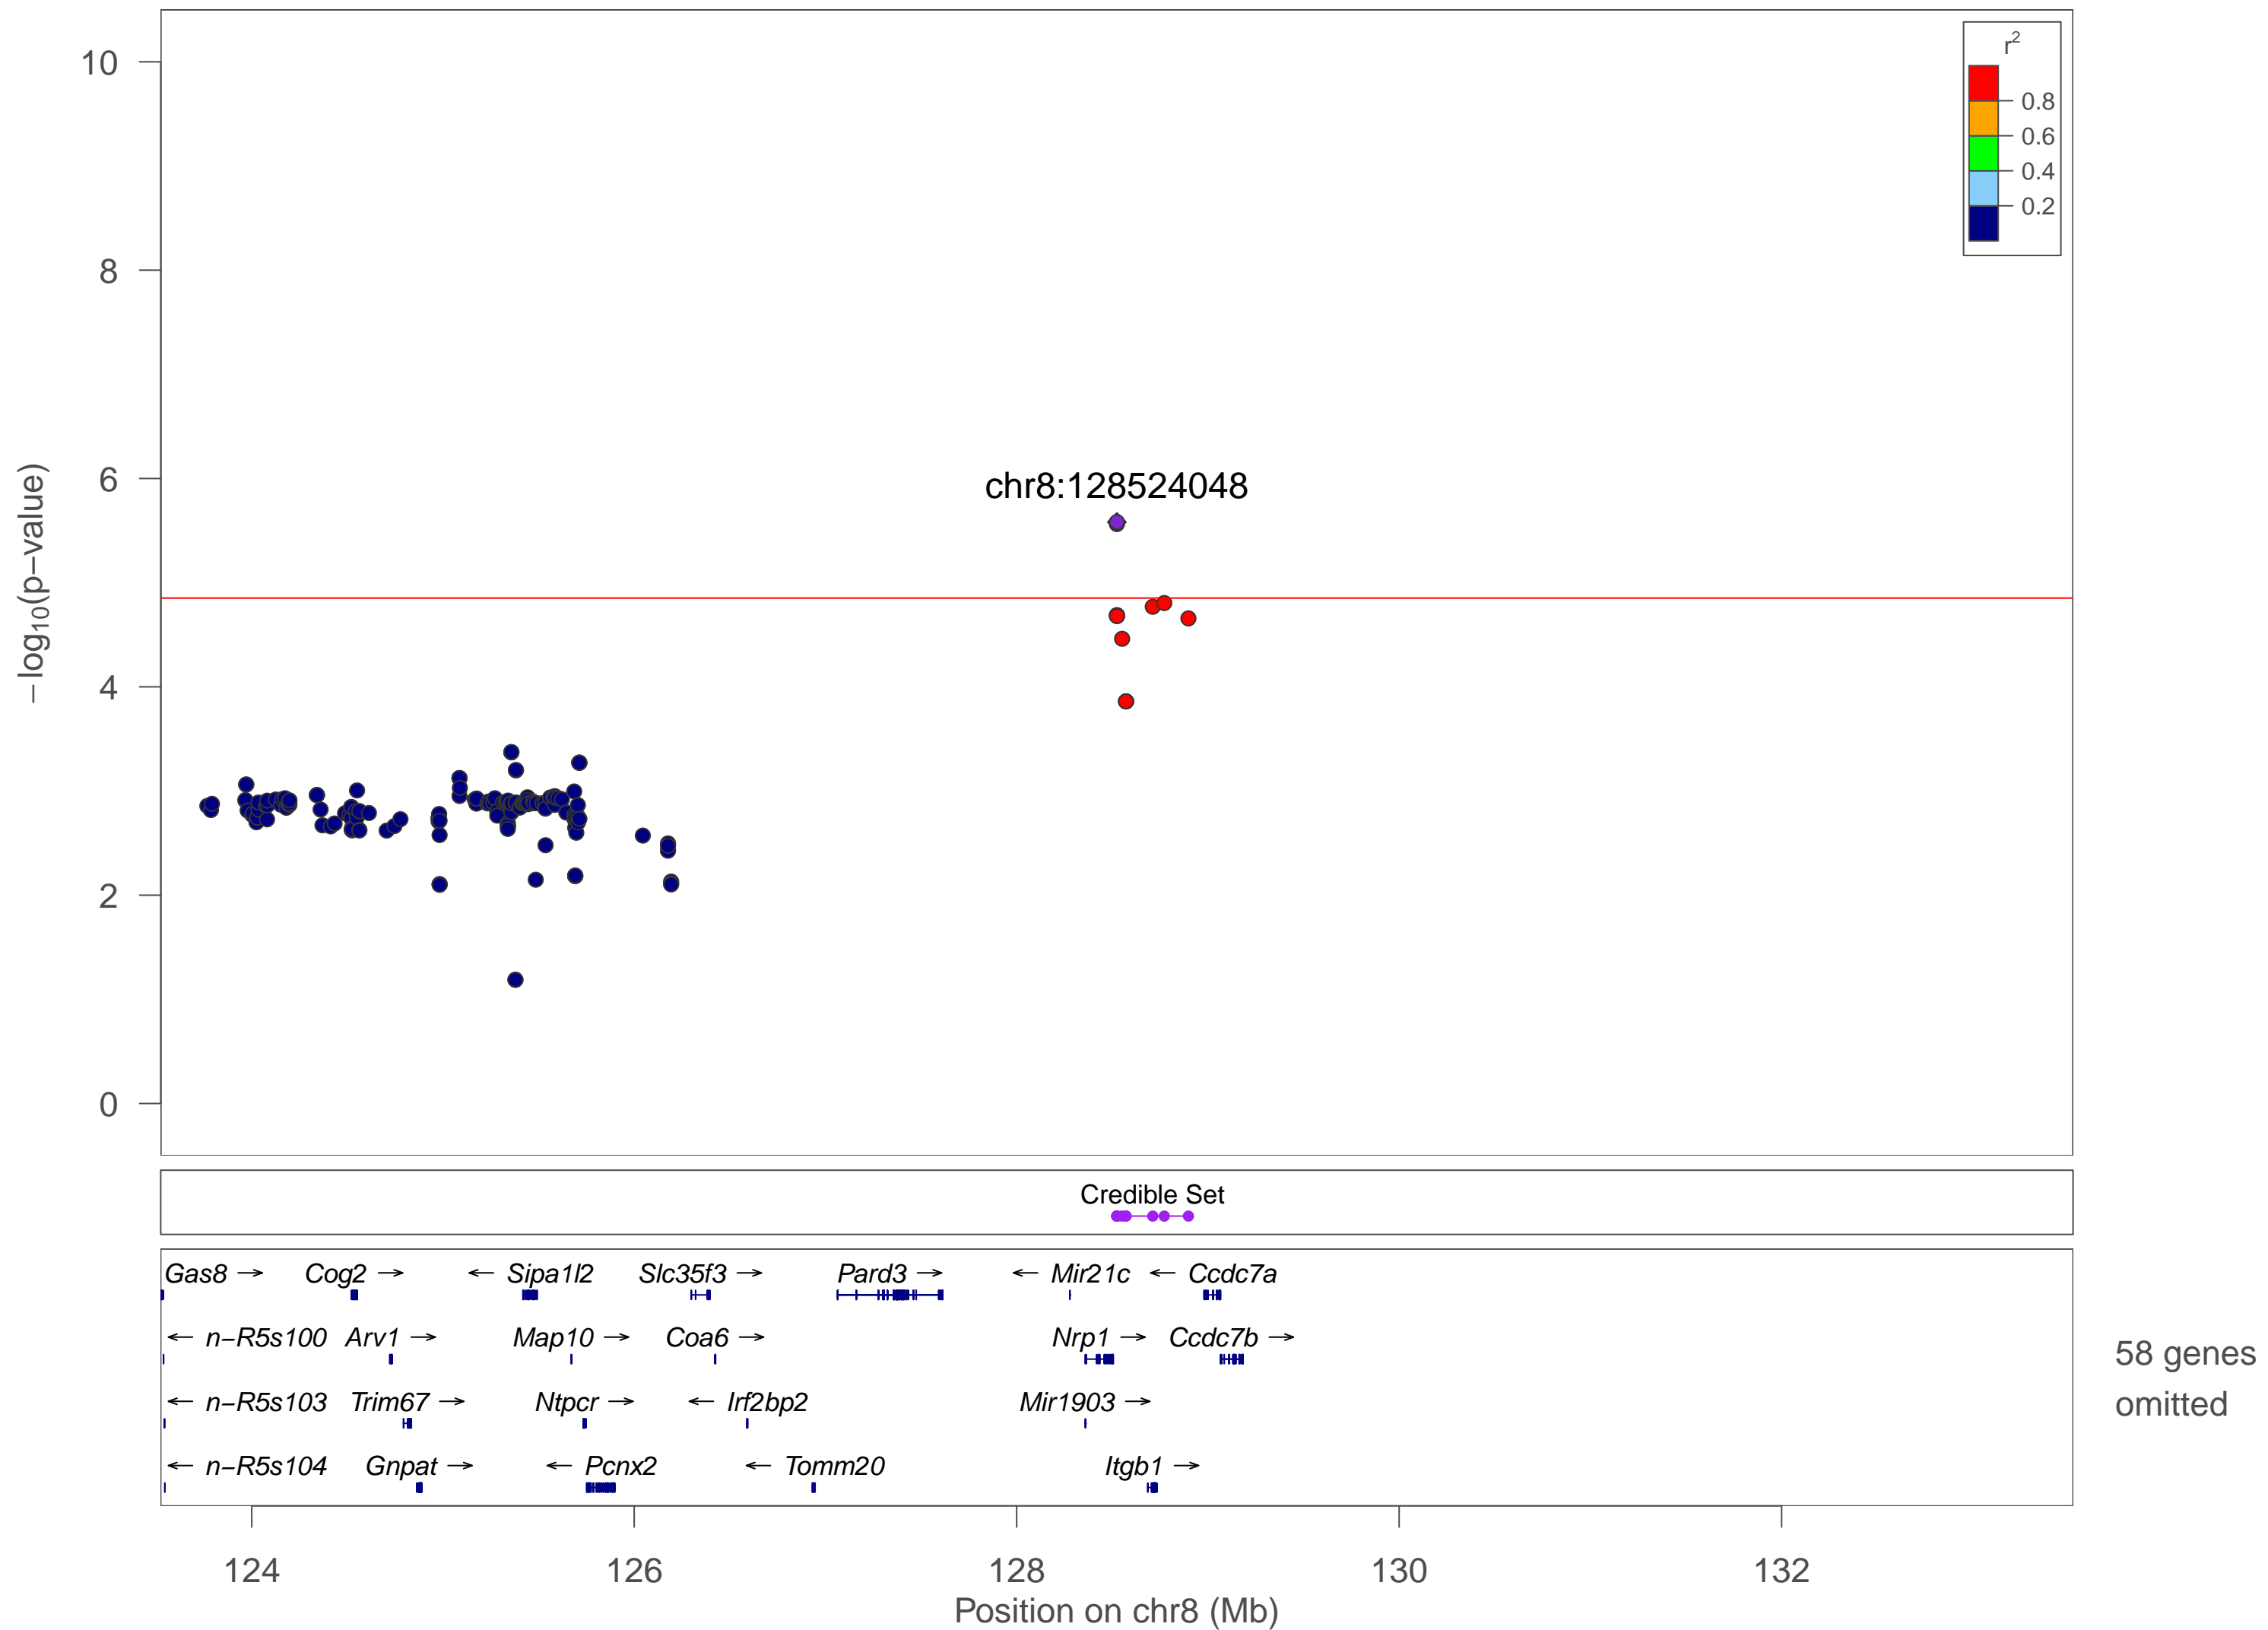

date: Thu Oct 25 17:04:47 2018  
build: F34GBS  
display range: chr8:123524048–133524048 [123524048–133524048]  
hilite range: 0 – 0 [ 0 – 0 ]  
reference SNP: chr8:128524048  
number of SNPs plotted: 191  
min P-value: 2.62E–6 [chr8:128524048]  
max P-value: 6.49E–2 [chr8:125378859]  
omitted Genes: n-R5s105, n-R5s108, n-R5s110  
omitted Genes: n-R5s111, n-R5s113, Gm25018  
omitted Genes: n-R5s117, n-R5s121, n-R5s122  
omitted Genes: n-R5s123, n-R5s124, n-R5s128  
omitted Genes: Gm26391, n-R5s133, n-R5s134  
omitted Genes: Rn5s, n-R5s136, n-R5s138  
omitted Genes: n-R5s139, Gm22109, n-R5s141  
omitted Genes: n-R5s142, n-R5s143, n-R5s144  
omitted Genes: Gm25212, n-R5s146, Gm22291  
omitted Genes: Gm23284, n-R5s149, Rhou  
omitted Genes: 6030466F02Rik, Rab4a, Ccsap  
omitted Genes: Acta1, Nup133, Abcb10  
omitted Genes: Taf5l, Mir1967, Urb2  
omitted Genes: Galnt2, Pgbd5, Agt  
omitted Genes: Capn9, 2310022B05Rik, Ttc13  
omitted Genes: Fam89a, 2810004N23Rik, Exoc8  
omitted Genes: Sprtn, Egl1, Tsnax  
omitted Genes: Disc1, 4930567H12Rik, BC021891  
omitted Genes: Kcnk1, Gm17296, Rbm34  
omitted Genes: 2610044O15Rik8



Fine-mapping Regions

| snp            | chr | pos (Mb) | pp          | group        | color  |
|----------------|-----|----------|-------------|--------------|--------|
| chr8:128523972 | 8   | 128.5240 | 0.033717596 | Credible Set | purple |
| chr8:128524047 | 8   | 128.5240 | 0.238995812 | Credible Set | purple |
| chr8:128524048 | 8   | 128.5240 | 0.241872420 | Credible Set | purple |
| chr8:128524081 | 8   | 128.5241 | 0.232170029 | Credible Set | purple |
| chr8:128524424 | 8   | 128.5244 | 0.033841364 | Credible Set | purple |
| chr8:128524425 | 8   | 128.5244 | 0.033257818 | Credible Set | purple |
| chr8:128524441 | 8   | 128.5244 | 0.033192537 | Credible Set | purple |
| chr8:128551483 | 8   | 128.5515 | 0.020601125 | Credible Set | purple |
| chr8:128571869 | 8   | 128.5719 | 0.005561569 | Credible Set | purple |
| chr8:128571887 | 8   | 128.5719 | 0.005561968 | Credible Set | purple |
| chr8:128711717 | 8   | 128.7117 | 0.040376936 | Credible Set | purple |
| chr8:128771719 | 8   | 128.7717 | 0.043695102 | Credible Set | purple |
| chr8:128898075 | 8   | 128.8981 | 0.031594156 | Credible Set | purple |

# F34 GBS, retic parameters concentration of hemoglobin in reticulocytes

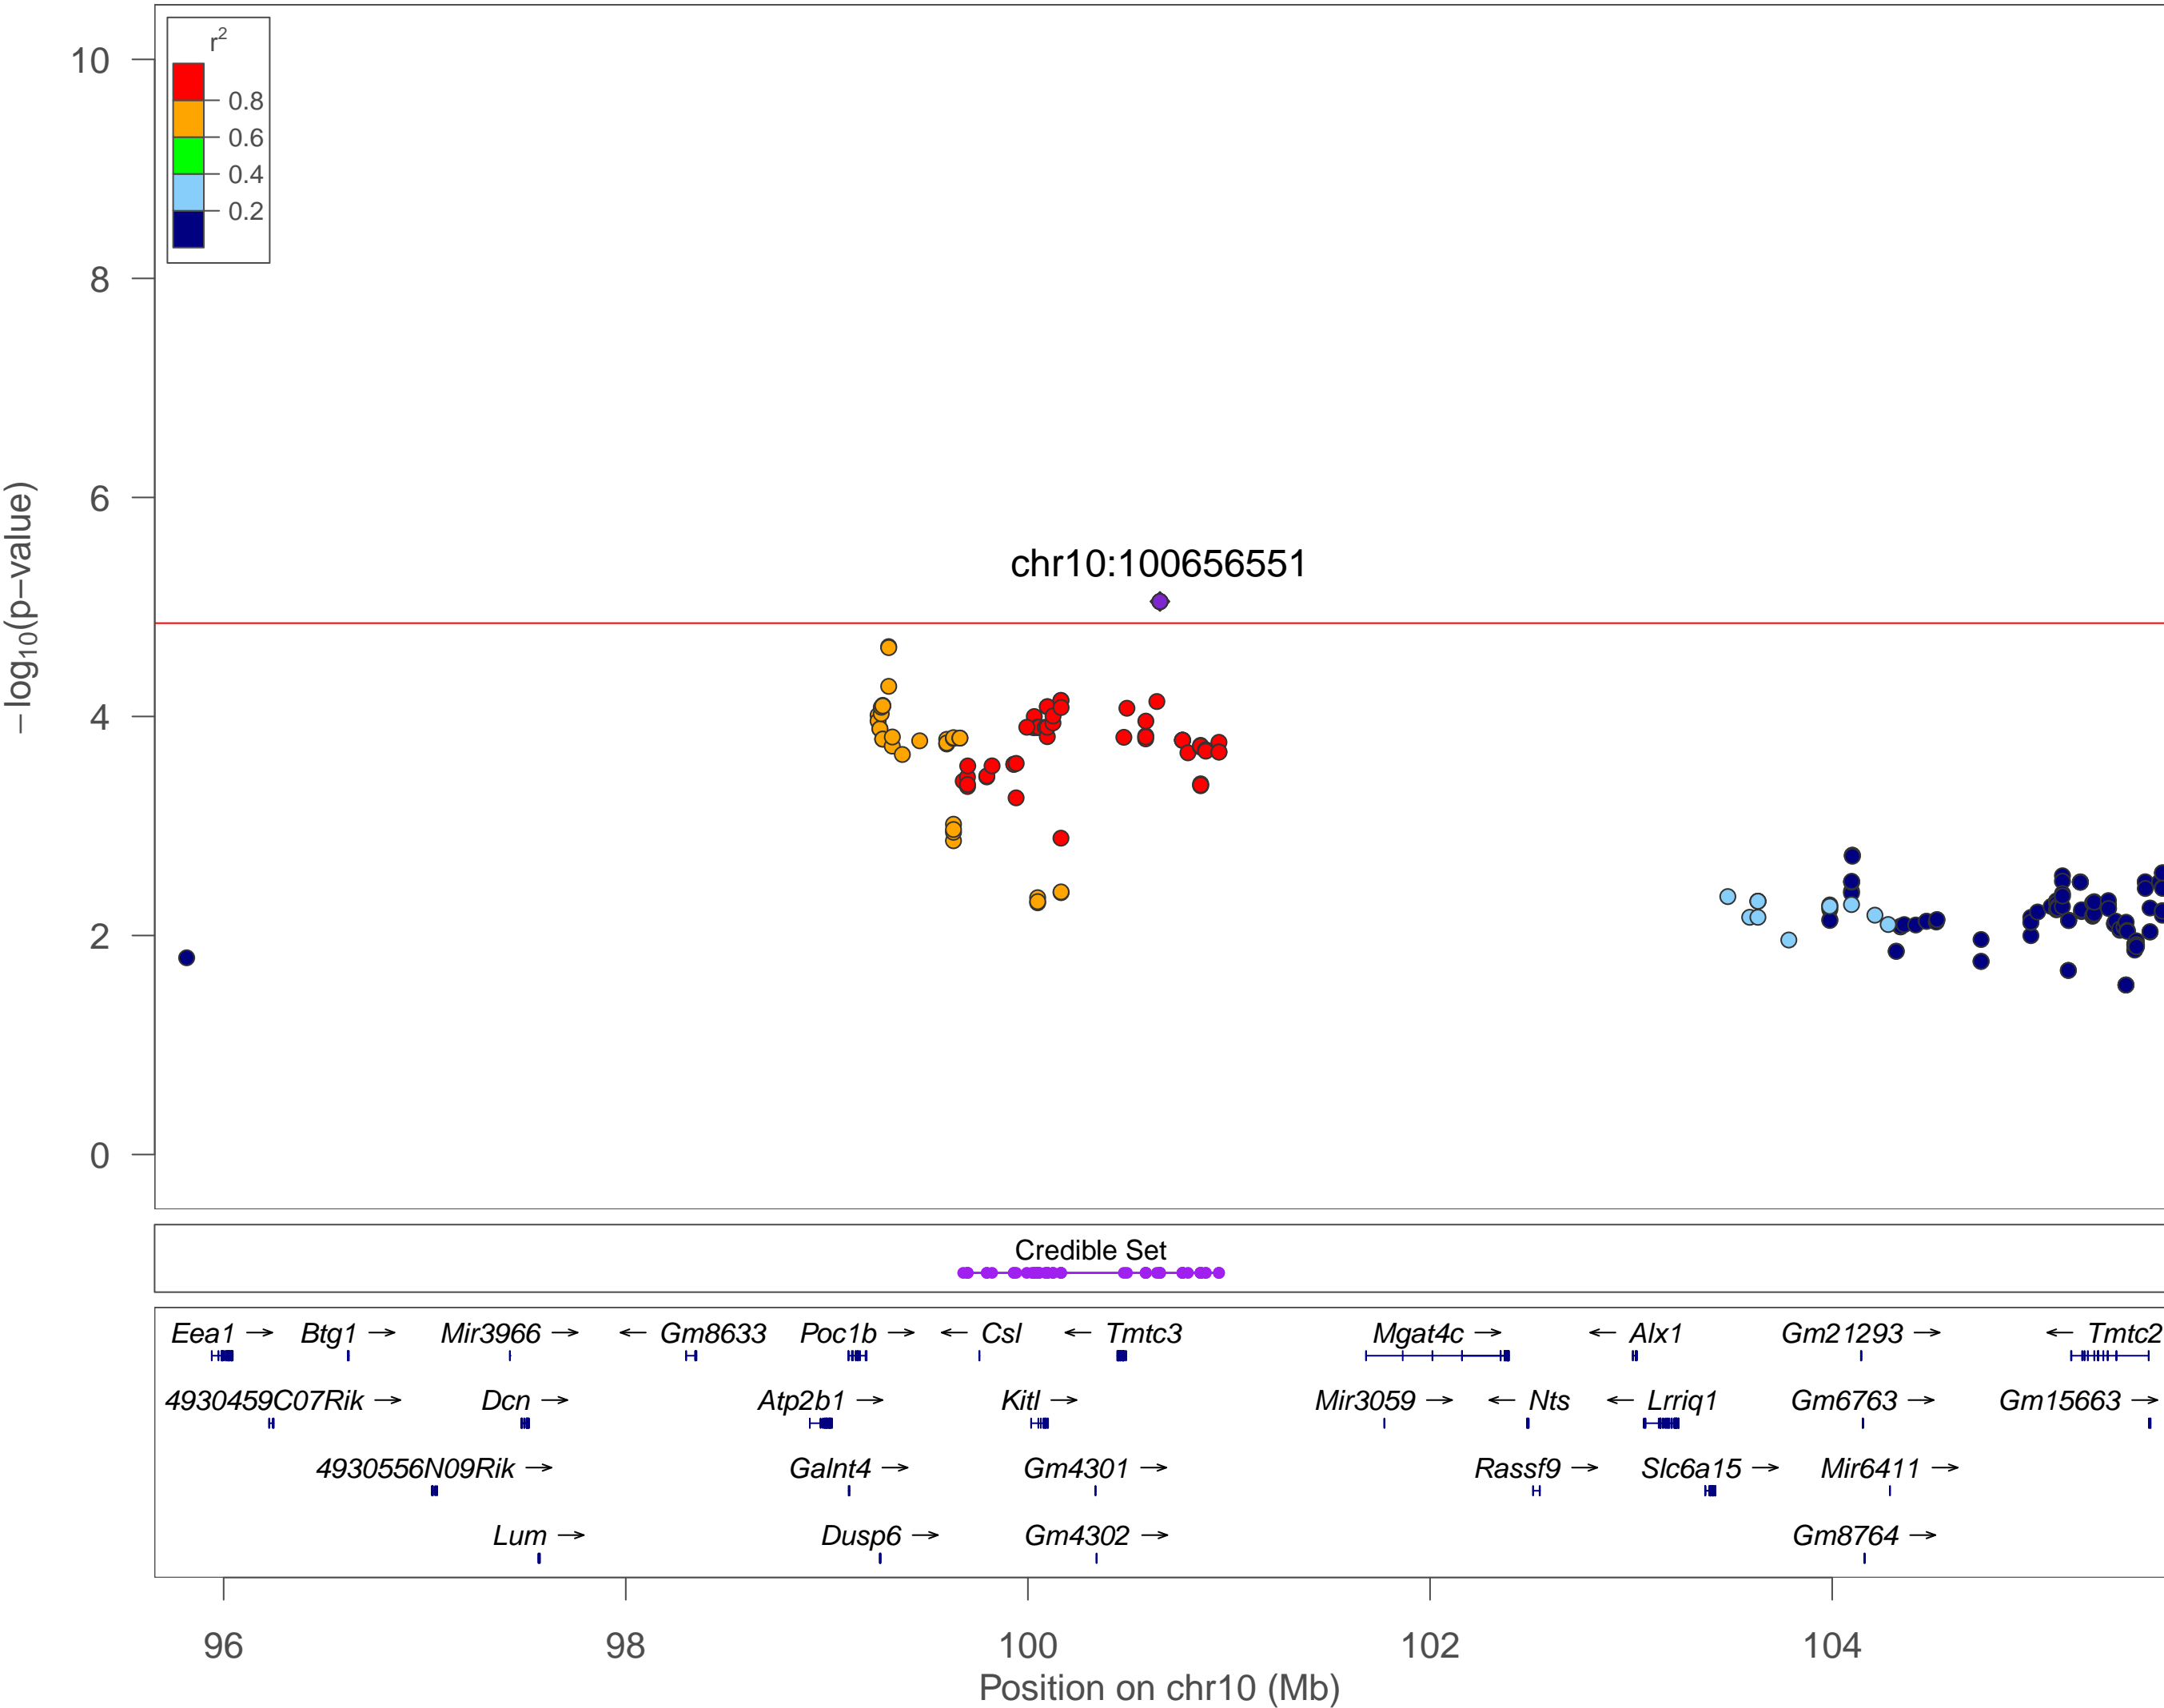

date: Thu Oct 25 17:04:25 2018

build: F34GBS

display range: chr10:95656551–105656551 [95656551–105656551]

hilite range: 0 – 0 [ 0 – 0 ]

reference SNP: chr10:100656551

number of SNPs plotted: 225

min P-value: 8.91E–6 [chr10:100656551]

max P-value: 2.83E–2 [chr10:105460999]

omitted Genes: 4930473O22Rik, Kera, Epyc

omitted Genes: Gm10754, Ccer1, 4930525C09Rik

omitted Genes: Gm20110, Gm18409, Gm4303

omitted Genes: Gm4305, Gm4307, Gm4312

omitted Genes: Cep290, 4930430F08Rik, 1700017N19Rik

omitted Genes: Gm21304, Gm21312, Gm20765

omitted Genes: Gm4340

## Fine-mapping Regions

| snp             | chr | pos (Mb)  | pp          | group        | color  |
|-----------------|-----|-----------|-------------|--------------|--------|
| chr10:99678204  | 10  | 99.67820  | 0.003695785 | Credible Set | purple |
| chr10:99699271  | 10  | 99.69927  | 0.004004593 | Credible Set | purple |
| chr10:99699681  | 10  | 99.69968  | 0.003455693 | Credible Set | purple |
| chr10:99700646  | 10  | 99.70065  | 0.004977286 | Credible Set | purple |
| chr10:99795502  | 10  | 99.79550  | 0.004015112 | Credible Set | purple |
| chr10:99795653  | 10  | 99.79565  | 0.004090384 | Credible Set | purple |
| chr10:99821621  | 10  | 99.82162  | 0.004993822 | Credible Set | purple |
| chr10:99929872  | 10  | 99.92987  | 0.005147946 | Credible Set | purple |
| chr10:99930010  | 10  | 99.93001  | 0.005147946 | Credible Set | purple |
| chr10:99941475  | 10  | 99.94147  | 0.005237917 | Credible Set | purple |
| chr10:99994442  | 10  | 99.99444  | 0.010728454 | Credible Set | purple |
| chr10:100020266 | 10  | 100.02027 | 0.010728454 | Credible Set | purple |
| chr10:100031418 | 10  | 100.03142 | 0.010569132 | Credible Set | purple |
| chr10:100031691 | 10  | 100.03169 | 0.013242003 | Credible Set | purple |
| chr10:100048262 | 10  | 100.04826 | 0.010728454 | Credible Set | purple |
| chr10:100048350 | 10  | 100.04835 | 0.010728454 | Credible Set | purple |
| chr10:100048362 | 10  | 100.04836 | 0.010728454 | Credible Set | purple |
| chr10:100055412 | 10  | 100.05541 | 0.010728454 | Credible Set | purple |
| chr10:100055418 | 10  | 100.05542 | 0.010728454 | Credible Set | purple |
| chr10:100086663 | 10  | 100.08666 | 0.010728454 | Credible Set | purple |
| chr10:100096296 | 10  | 100.09630 | 0.008868477 | Credible Set | purple |
| chr10:100096708 | 10  | 100.09671 | 0.010728454 | Credible Set | purple |
| chr10:100096785 | 10  | 100.09678 | 0.016158474 | Credible Set | purple |
| chr10:100096807 | 10  | 100.09681 | 0.016158474 | Credible Set | purple |
| chr10:100124479 | 10  | 100.12448 | 0.011605958 | Credible Set | purple |
| chr10:100125049 | 10  | 100.12505 | 0.013368238 | Credible Set | purple |
| chr10:100164149 | 10  | 100.16415 | 0.018302663 | Credible Set | purple |
| chr10:100164180 | 10  | 100.16418 | 0.018302663 | Credible Set | purple |
| chr10:100164914 | 10  | 100.16491 | 0.015790220 | Credible Set | purple |
| chr10:100477167 | 10  | 100.47717 | 0.008760724 | Credible Set | purple |
| chr10:100492319 | 10  | 100.49232 | 0.015612511 | Credible Set | purple |
| chr10:100585564 | 10  | 100.58556 | 0.008502828 | Credible Set | purple |
| chr10:100585784 | 10  | 100.58578 | 0.009035353 | Credible Set | purple |
| chr10:100585854 | 10  | 100.58585 | 0.008814260 | Credible Set | purple |
| chr10:100586507 | 10  | 100.58651 | 0.012102948 | Credible Set | purple |
| chr10:100641295 | 10  | 100.64129 | 0.017827993 | Credible Set | purple |

Fine-mapping Regions

| snp             | chr | pos (Mb) | pp          | group        | color  |
|-----------------|-----|----------|-------------|--------------|--------|
| chr10:100656540 | 10  | 100.6565 | 0.130504087 | Credible Set | purple |
| chr10:100656551 | 10  | 100.6566 | 0.130504087 | Credible Set | purple |
| chr10:100656588 | 10  | 100.6566 | 0.130504087 | Credible Set | purple |
| chr10:100656608 | 10  | 100.6566 | 0.130504087 | Credible Set | purple |
| chr10:100768688 | 10  | 100.7687 | 0.008260169 | Credible Set | purple |
| chr10:100768699 | 10  | 100.7687 | 0.008260169 | Credible Set | purple |
| chr10:100768710 | 10  | 100.7687 | 0.008260169 | Credible Set | purple |
| chr10:100768727 | 10  | 100.7687 | 0.008260169 | Credible Set | purple |
| chr10:100795827 | 10  | 100.7958 | 0.006440819 | Credible Set | purple |
| chr10:100858643 | 10  | 100.8586 | 0.007233931 | Credible Set | purple |
| chr10:100858698 | 10  | 100.8587 | 0.007455446 | Credible Set | purple |
| chr10:100858701 | 10  | 100.8587 | 0.007380061 | Credible Set | purple |
| chr10:100858992 | 10  | 100.8590 | 0.003502672 | Credible Set | purple |
| chr10:100859031 | 10  | 100.8590 | 0.003372882 | Credible Set | purple |
| chr10:100859032 | 10  | 100.8590 | 0.003425095 | Credible Set | purple |
| chr10:100884062 | 10  | 100.8841 | 0.006861303 | Credible Set | purple |
| chr10:100884636 | 10  | 100.8846 | 0.006674317 | Credible Set | purple |
| chr10:100949966 | 10  | 100.9500 | 0.007943553 | Credible Set | purple |
| chr10:100950077 | 10  | 100.9501 | 0.006555414 | Credible Set | purple |
| chr10:100950118 | 10  | 100.9501 | 0.006555414 | Credible Set | purple |

# F34 GBS, retic parameters mean reticulocyte volume

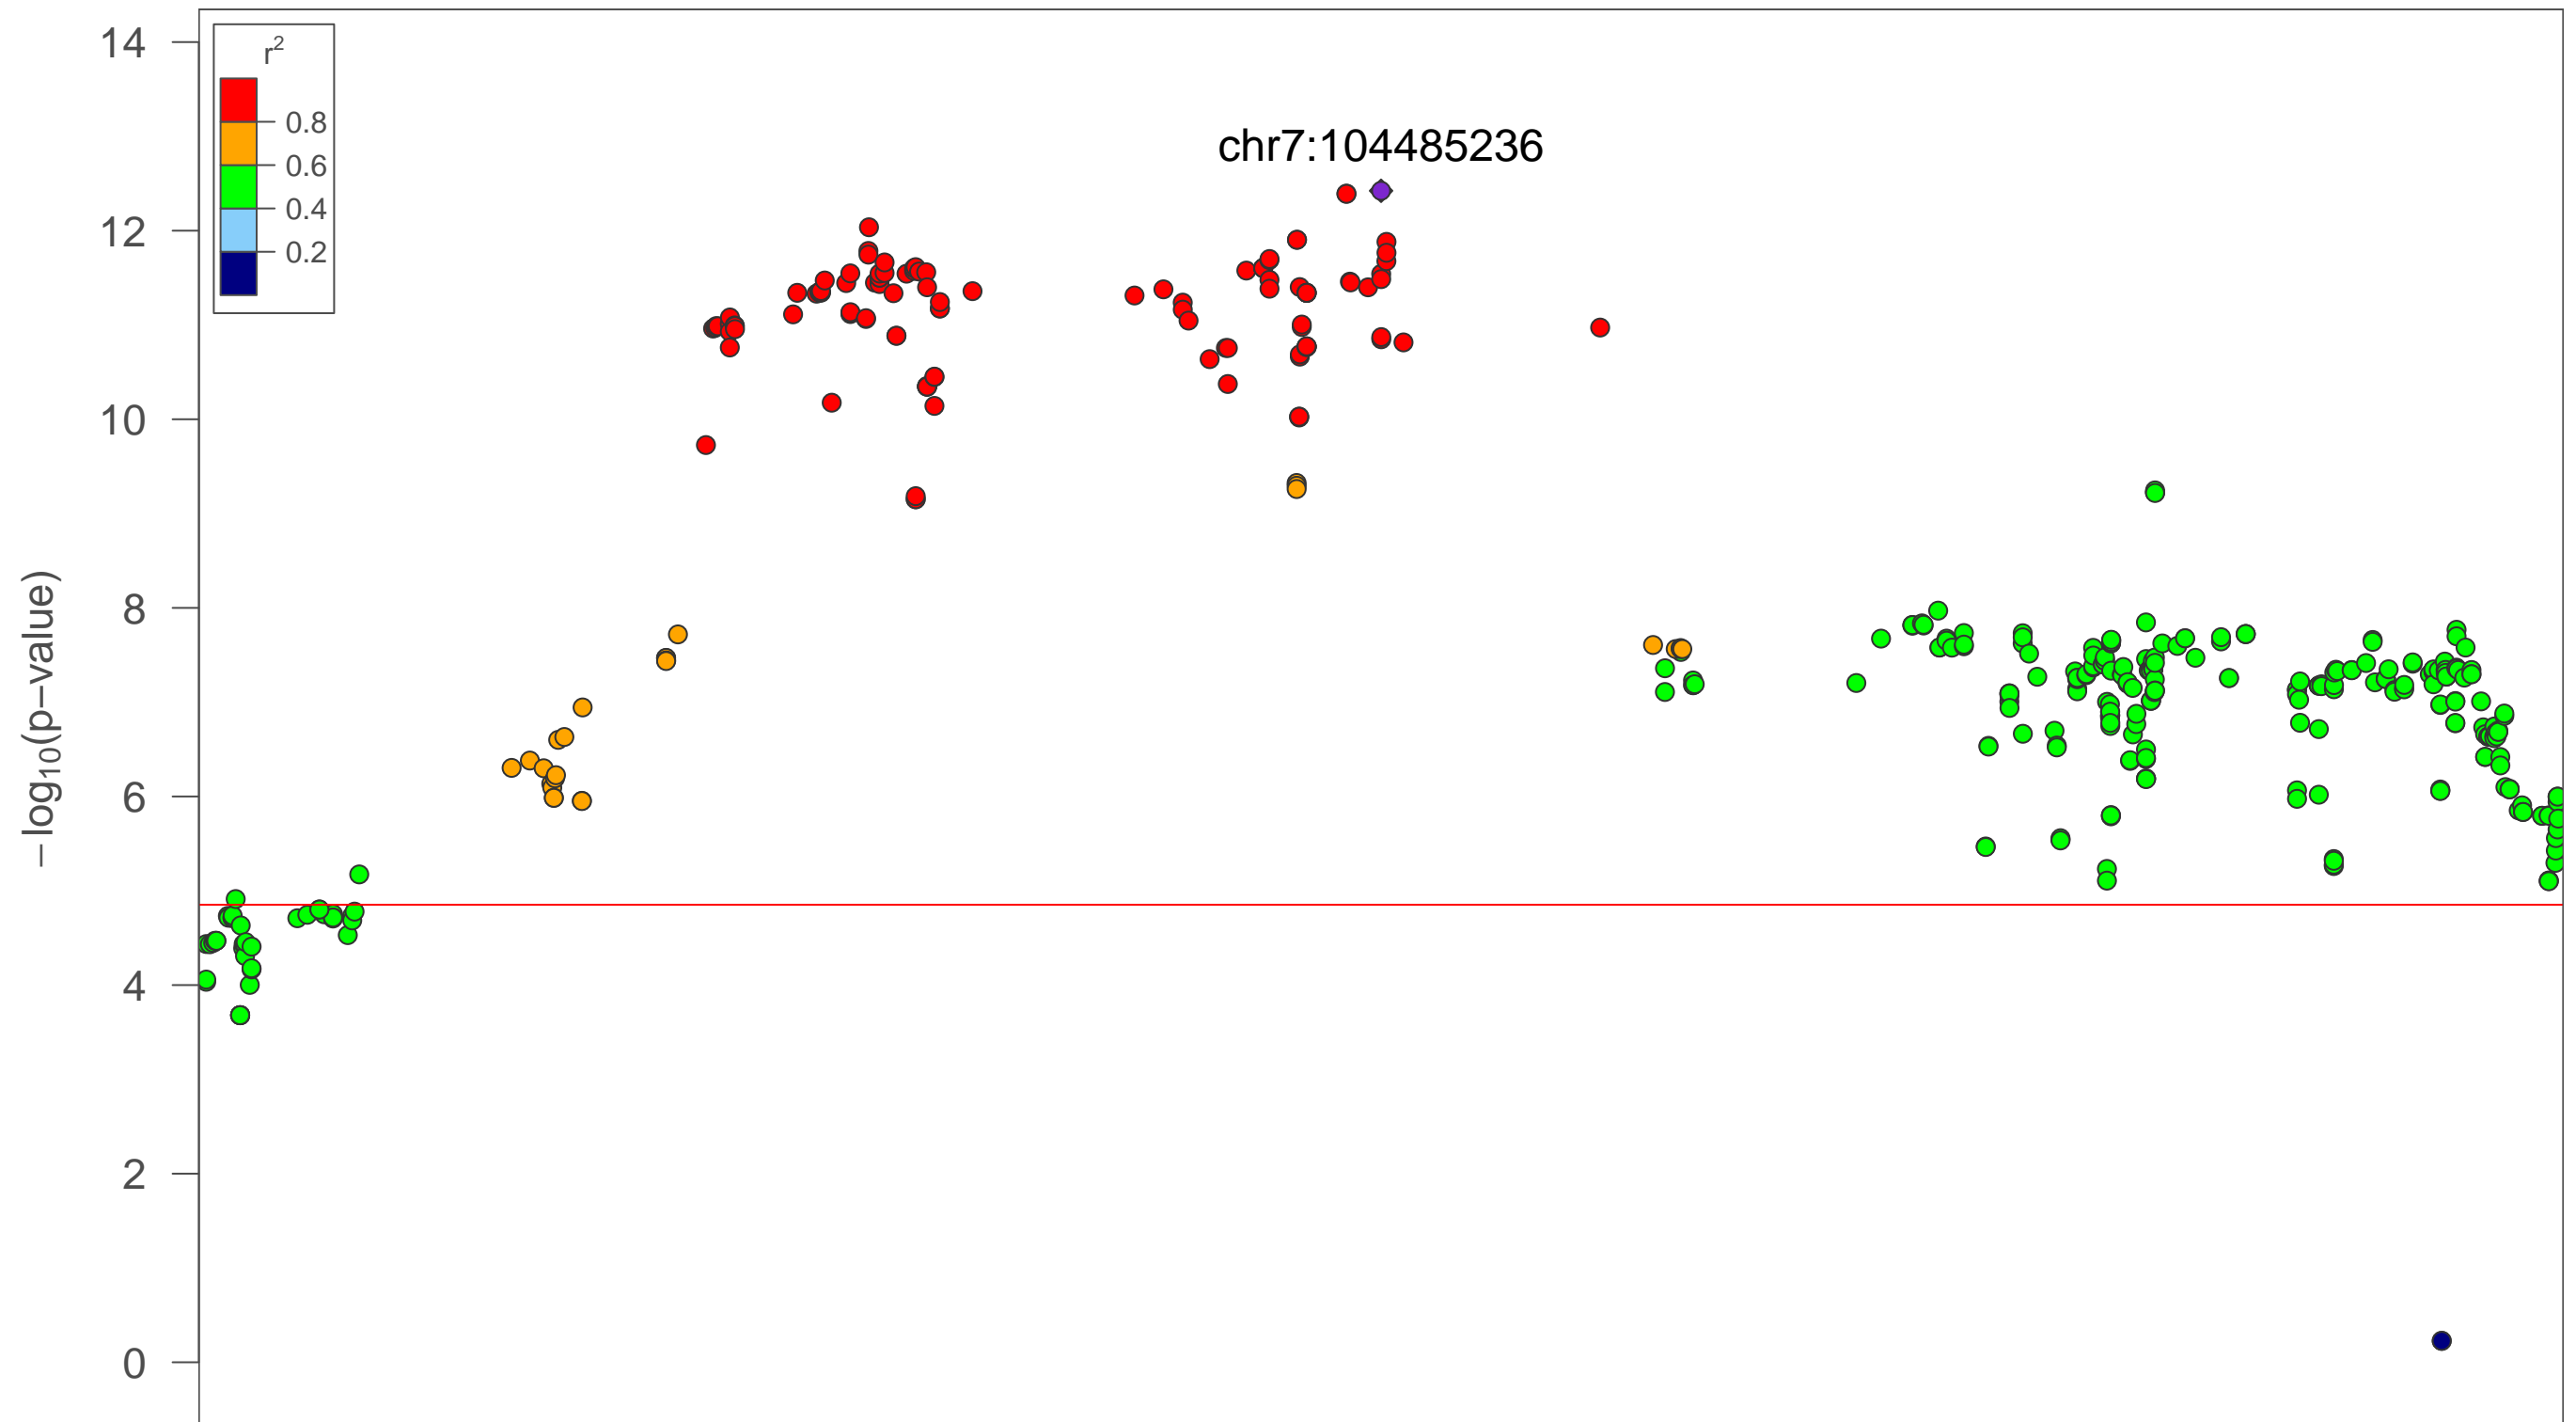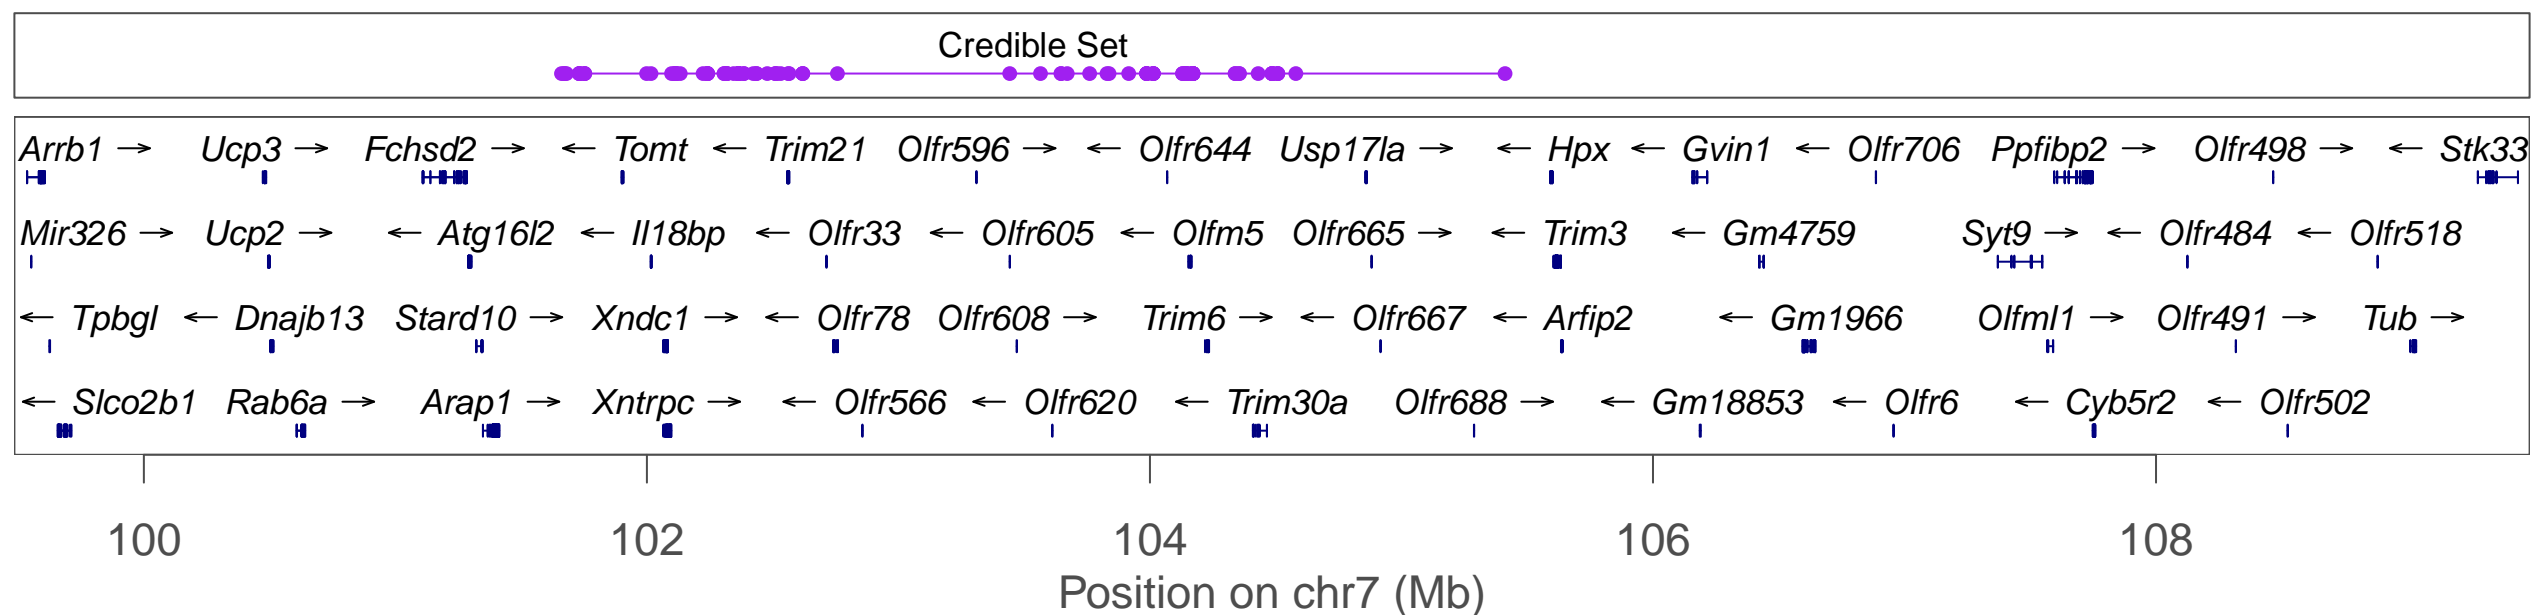

269 genes  
omitted

date: Thu Oct 25 17:05:11 2018

build: F34GBS

display range: chr7:99485236–109485236 [99485236–109485236]

hilite range: 0 – 0 [ 0 – 0 ]

reference SNP: chr7:104485236

number of SNPs plotted: 448

min P-value: 3.78E–13 [chr7:104485236]

max P-value: 5.92E–1 [chr7:108970724]

omitted Genes: Olfr520, Olfr521, Neu3

omitted Genes: Spcs2, Xrra1, Rnf169

omitted Genes: Chrdl2, Pold3, Lipt2

omitted Genes: Kcne3, Pgm2l1, Gpx2-ps1

omitted Genes: P4ha3, Ppme1, C2cd3

omitted Genes: Coa4, Mrpl48, Plekha1

omitted Genes: Fam168a, Relt, Arhgef17

omitted Genes: Mir3102, P2ry6, P2ry2

omitted Genes: Pde2a, Mir139, Art2a-ps

omitted Genes: Art2b, Clpb, Phox2a

omitted Genes: Inpp1, Folr2, Folr1

omitted Genes: Anapc15, Lamtor1, Lrrc51

omitted Genes: Numa1, Rnf121, Trpc2

omitted Genes: Art5, Art1, Chrna10

omitted Genes: Nup98, Pgap2, Rhog

omitted Genes: Stim1, Rrm1, Olfr543

omitted Genes: Olfr544, Olfr545, Olfr547

omitted Genes: Olfr549, Olfr550, Olfr551

omitted Genes: Olfr552, Olfr553, Olfr554

omitted Genes: Olfr555, Olfr556, Trim68

omitted Genes: Olfr557, Olfr558, Olfr559

omitted Genes: Olfr560, Olfr561, Olfr564

omitted Genes: Olfr568, Olfr569, Olfr570

omitted Genes: Olfr571, Olfr572, Olfr574

omitted Genes: Olfr575, Olfr576, Olfr577

omitted Genes: Olfr578, Olfr582, Olfr583

omitted Genes: Olfr584, Olfr585, Olfr586

omitted Genes: Olfr589, Olfr591, Olfr592

omitted Genes: Olfr593, Olfr594, Usp17ld

omitted Genes: Olfr597, Olfr598, Olfr599

omitted Genes: Olfr600, Olfr601, Olfr603

omitted Genes: Usp17lc, Olfr606, Olfr609

Make more plots at <http://csg.sph.umich.edu/locuszoom/>

## Fine-mapping Regions

| snp            | chr | pos (Mb) | pp          | group        | color  |
|----------------|-----|----------|-------------|--------------|--------|
| chr7:101660383 | 7   | 101.6604 | 0.002922584 | Credible Set | purple |
| chr7:101669186 | 7   | 101.6692 | 0.002980118 | Credible Set | purple |
| chr7:101673483 | 7   | 101.6735 | 0.003100272 | Credible Set | purple |
| chr7:101680140 | 7   | 101.6801 | 0.003089270 | Credible Set | purple |
| chr7:101731061 | 7   | 101.7311 | 0.003264047 | Credible Set | purple |
| chr7:101731110 | 7   | 101.7311 | 0.002720615 | Credible Set | purple |
| chr7:101731130 | 7   | 101.7311 | 0.001858530 | Credible Set | purple |
| chr7:101731658 | 7   | 101.7317 | 0.003812740 | Credible Set | purple |
| chr7:101751790 | 7   | 101.7518 | 0.003150088 | Credible Set | purple |
| chr7:101752580 | 7   | 101.7526 | 0.003097184 | Credible Set | purple |
| chr7:101752971 | 7   | 101.7530 | 0.002881860 | Credible Set | purple |
| chr7:101998679 | 7   | 101.9987 | 0.004105885 | Credible Set | purple |
| chr7:102016307 | 7   | 102.0163 | 0.006874705 | Credible Set | purple |
| chr7:102098054 | 7   | 102.0981 | 0.006735745 | Credible Set | purple |
| chr7:102110109 | 7   | 102.1101 | 0.006940155 | Credible Set | purple |
| chr7:102110501 | 7   | 102.1105 | 0.007050173 | Credible Set | purple |
| chr7:102116318 | 7   | 102.1163 | 0.006921301 | Credible Set | purple |
| chr7:102116430 | 7   | 102.1164 | 0.006921301 | Credible Set | purple |
| chr7:102116478 | 7   | 102.1165 | 0.007172341 | Credible Set | purple |
| chr7:102132562 | 7   | 102.1326 | 0.009237227 | Credible Set | purple |
| chr7:102223396 | 7   | 102.2234 | 0.008678256 | Credible Set | purple |
| chr7:102240695 | 7   | 102.2407 | 0.010954729 | Credible Set | purple |
| chr7:102241191 | 7   | 102.2412 | 0.004136877 | Credible Set | purple |
| chr7:102241211 | 7   | 102.2412 | 0.004235478 | Credible Set | purple |
| chr7:102241212 | 7   | 102.2412 | 0.004323937 | Credible Set | purple |
| chr7:102306968 | 7   | 102.3070 | 0.003675950 | Credible Set | purple |
| chr7:102306978 | 7   | 102.3070 | 0.003746813 | Credible Set | purple |
| chr7:102317213 | 7   | 102.3172 | 0.018744530 | Credible Set | purple |
| chr7:102317246 | 7   | 102.3172 | 0.017143486 | Credible Set | purple |
| chr7:102319586 | 7   | 102.3196 | 0.033053856 | Credible Set | purple |
| chr7:102344970 | 7   | 102.3450 | 0.008763101 | Credible Set | purple |
| chr7:102363897 | 7   | 102.3639 | 0.010237186 | Credible Set | purple |
| chr7:102364204 | 7   | 102.3642 | 0.009390003 | Credible Set | purple |
| chr7:102364223 | 7   | 102.3642 | 0.008475725 | Credible Set | purple |
| chr7:102364315 | 7   | 102.3643 | 0.009876047 | Credible Set | purple |
| chr7:102364326 | 7   | 102.3643 | 0.009876047 | Credible Set | purple |



## Fine-mapping Regions

| snp            | chr | pos (Mb) | pp          | group        | color  |
|----------------|-----|----------|-------------|--------------|--------|
| chr7:102364411 | 7   | 102.3644 | 0.010896742 | Credible Set | purple |
| chr7:102385520 | 7   | 102.3855 | 0.011063609 | Credible Set | purple |
| chr7:102385536 | 7   | 102.3855 | 0.014229578 | Credible Set | purple |
| chr7:102423165 | 7   | 102.4232 | 0.006809155 | Credible Set | purple |
| chr7:102435692 | 7   | 102.4357 | 0.002460061 | Credible Set | purple |
| chr7:102435720 | 7   | 102.4357 | 0.002460061 | Credible Set | purple |
| chr7:102478469 | 7   | 102.4785 | 0.010867907 | Credible Set | purple |
| chr7:102510475 | 7   | 102.5105 | 0.011608096 | Credible Set | purple |
| chr7:102510607 | 7   | 102.5106 | 0.012399442 | Credible Set | purple |
| chr7:102516878 | 7   | 102.5169 | 0.012715001 | Credible Set | purple |
| chr7:102531652 | 7   | 102.5317 | 0.011438024 | Credible Set | purple |
| chr7:102561708 | 7   | 102.5617 | 0.011251725 | Credible Set | purple |
| chr7:102565410 | 7   | 102.5654 | 0.007851336 | Credible Set | purple |
| chr7:102619418 | 7   | 102.6194 | 0.004724310 | Credible Set | purple |
| chr7:102619431 | 7   | 102.6194 | 0.004725741 | Credible Set | purple |
| chr7:102619466 | 7   | 102.6195 | 0.005514189 | Credible Set | purple |
| chr7:102757499 | 7   | 102.7575 | 0.007152918 | Credible Set | purple |
| chr7:103442570 | 7   | 103.4426 | 0.006445316 | Credible Set | purple |
| chr7:103564836 | 7   | 103.5648 | 0.007471790 | Credible Set | purple |
| chr7:103646439 | 7   | 103.6464 | 0.005434970 | Credible Set | purple |
| chr7:103646709 | 7   | 103.6467 | 0.004594335 | Credible Set | purple |
| chr7:103671033 | 7   | 103.6710 | 0.003535162 | Credible Set | purple |
| chr7:103760301 | 7   | 103.7603 | 0.001406962 | Credible Set | purple |
| chr7:103829200 | 7   | 103.8292 | 0.001838384 | Credible Set | purple |
| chr7:103837213 | 7   | 103.8372 | 0.001835699 | Credible Set | purple |
| chr7:103915503 | 7   | 103.9155 | 0.011708764 | Credible Set | purple |
| chr7:103986792 | 7   | 103.9868 | 0.012442039 | Credible Set | purple |
| chr7:103986795 | 7   | 103.9868 | 0.012442039 | Credible Set | purple |
| chr7:103986857 | 7   | 103.9869 | 0.012419049 | Credible Set | purple |
| chr7:103986860 | 7   | 103.9869 | 0.012419049 | Credible Set | purple |
| chr7:104012808 | 7   | 104.0128 | 0.015074030 | Credible Set | purple |
| chr7:104013370 | 7   | 104.0134 | 0.009389331 | Credible Set | purple |
| chr7:104013395 | 7   | 104.0134 | 0.007585969 | Credible Set | purple |
| chr7:104013467 | 7   | 104.0135 | 0.015455171 | Credible Set | purple |
| chr7:104129734 | 7   | 104.1297 | 0.024487194 | Credible Set | purple |
| chr7:104129736 | 7   | 104.1297 | 0.024487194 | Credible Set | purple |

## Fine-mapping Regions

| snp            | chr | pos (Mb) | pp          | group        | color  |
|----------------|-----|----------|-------------|--------------|--------|
| chr7:104141343 | 7   | 104.1413 | 0.007884958 | Credible Set | purple |
| chr7:104141705 | 7   | 104.1417 | 0.001493692 | Credible Set | purple |
| chr7:104141768 | 7   | 104.1418 | 0.001575630 | Credible Set | purple |
| chr7:104149893 | 7   | 104.1499 | 0.003036090 | Credible Set | purple |
| chr7:104149911 | 7   | 104.1499 | 0.003218082 | Credible Set | purple |
| chr7:104170479 | 7   | 104.1705 | 0.001907269 | Credible Set | purple |
| chr7:104170506 | 7   | 104.1705 | 0.001894180 | Credible Set | purple |
| chr7:104170518 | 7   | 104.1705 | 0.001879994 | Credible Set | purple |
| chr7:104170522 | 7   | 104.1705 | 0.001890011 | Credible Set | purple |
| chr7:104170543 | 7   | 104.1705 | 0.001910915 | Credible Set | purple |
| chr7:104170588 | 7   | 104.1706 | 0.006882723 | Credible Set | purple |
| chr7:104170594 | 7   | 104.1706 | 0.006857523 | Credible Set | purple |
| chr7:104170618 | 7   | 104.1706 | 0.006874262 | Credible Set | purple |
| chr7:104170662 | 7   | 104.1707 | 0.006874262 | Credible Set | purple |
| chr7:104338784 | 7   | 104.3388 | 0.073962290 | Credible Set | purple |
| chr7:104338810 | 7   | 104.3388 | 0.073651039 | Credible Set | purple |
| chr7:104353491 | 7   | 104.3535 | 0.008981800 | Credible Set | purple |
| chr7:104356230 | 7   | 104.3562 | 0.008816571 | Credible Set | purple |
| chr7:104430205 | 7   | 104.4302 | 0.007838657 | Credible Set | purple |
| chr7:104485236 | 7   | 104.4852 | 0.079147235 | Credible Set | purple |
| chr7:104485721 | 7   | 104.4857 | 0.010814539 | Credible Set | purple |
| chr7:104485727 | 7   | 104.4857 | 0.009539969 | Credible Set | purple |
| chr7:104486022 | 7   | 104.4860 | 0.002262679 | Credible Set | purple |
| chr7:104486041 | 7   | 104.4860 | 0.002383354 | Credible Set | purple |
| chr7:104507724 | 7   | 104.5077 | 0.014686410 | Credible Set | purple |
| chr7:104508127 | 7   | 104.5081 | 0.023288637 | Credible Set | purple |
| chr7:104508173 | 7   | 104.5082 | 0.017930859 | Credible Set | purple |
| chr7:104580091 | 7   | 104.5801 | 0.002099295 | Credible Set | purple |
| chr7:105411752 | 7   | 105.4118 | 0.002993724 | Credible Set | purple |

# F34 GBS, retic parameters mean reticulocyte volume

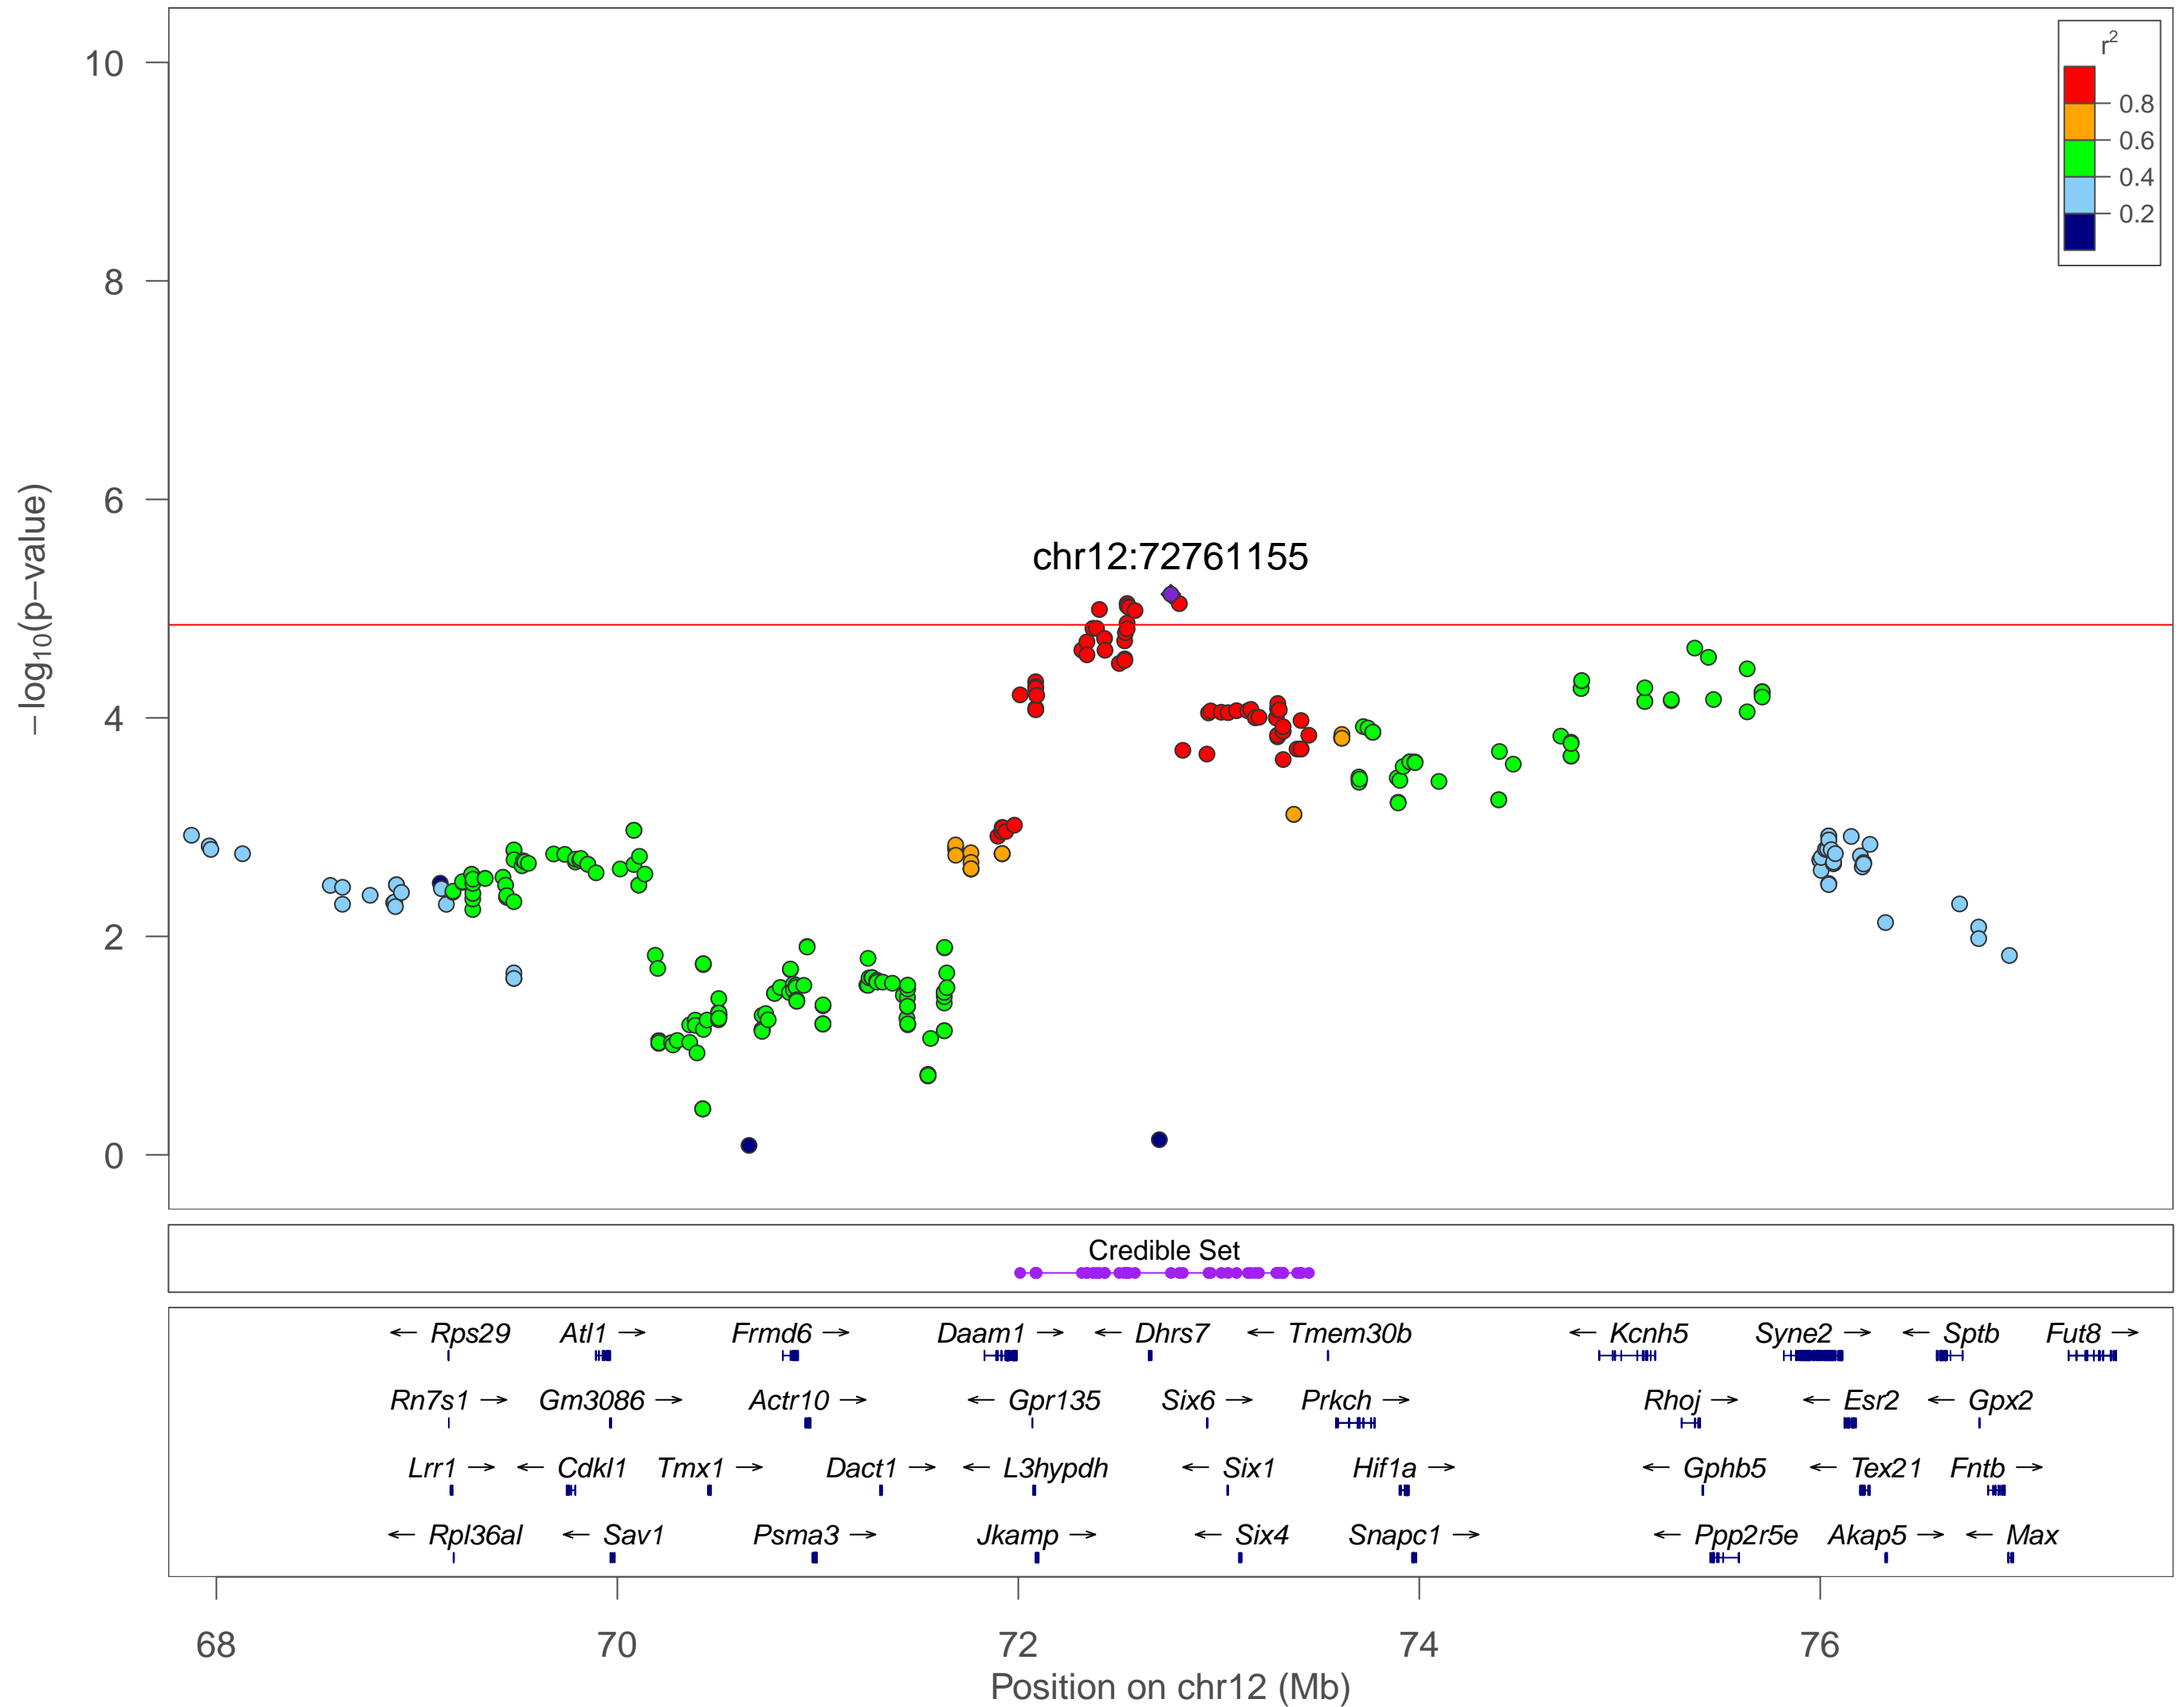

date: Thu Oct 25 17:04:57 2018  
build: F34GBS  
display range: chr12:67761155–77761155 [67761155–77761155]  
hilite range: 0 – 0 [ 0 – 0 ]  
reference SNP: chr12:72761155  
number of SNPs plotted: 336  
min P-value: 7.38E–6 [chr12:72761155]  
max P-value: 8.19E–1 [chr12:70656926]  
omitted Genes: Mgat2, Dnaaf2, 9330151L19Rik  
omitted Genes: Pole2, Klhdc1, Klhdc2  
omitted Genes: Nemf, Rn7s2, Arf6  
omitted Genes: 5830428M24Rik, Vcpkmt, Sos2  
omitted Genes: L2hgdh, Atp5s, Mir681  
omitted Genes: 4930512B01Rik, Map4k5, 4931403G20Rik  
omitted Genes: Nin, Abhd12b, Pygl  
omitted Genes: F730035M05Rik, Trim9, 3110056K07Rik  
omitted Genes: Arid4a, Tomm20l, Timm9  
omitted Genes: 2700049A03Rik, 1700083H02Rik, 4930404H11Rik  
omitted Genes: Ccdc175, Rtn1, Lrrc9  
omitted Genes: Pcnx4, Ppm1a, 4930447C04Rik  
omitted Genes: Mnat1, Trmt5, Slc38a6  
omitted Genes: D830013O20Rik, 2210039B01Rik, Syt16  
omitted Genes: 1700086L19Rik, Dbpht2, Wdr89  
omitted Genes: Rplp2-ps1, Sgpp1, Mir5101  
omitted Genes: Mthfd1, Zbtb25, Zbtb1  
omitted Genes: Hspa2, Ppp1r36, Gm10451  
omitted Genes: Mir5135, Plekhg3, AI463170  
omitted Genes: Churc1, Rab15

## Fine-mapping Regions

| snp            | chr | pos (Mb) | pp          | group        | color  |
|----------------|-----|----------|-------------|--------------|--------|
| chr12:72009199 | 12  | 72.00920 | 0.009313544 | Credible Set | purple |
| chr12:72086662 | 12  | 72.08666 | 0.012109109 | Credible Set | purple |
| chr12:72086706 | 12  | 72.08671 | 0.010931224 | Credible Set | purple |
| chr12:72086724 | 12  | 72.08672 | 0.010616944 | Credible Set | purple |
| chr12:72086792 | 12  | 72.08679 | 0.007133110 | Credible Set | purple |
| chr12:72086995 | 12  | 72.08700 | 0.006955550 | Credible Set | purple |
| chr12:72087027 | 12  | 72.08703 | 0.006936629 | Credible Set | purple |
| chr12:72091767 | 12  | 72.09177 | 0.009223625 | Credible Set | purple |
| chr12:72316934 | 12  | 72.31693 | 0.022792517 | Credible Set | purple |
| chr12:72342139 | 12  | 72.34214 | 0.026925751 | Credible Set | purple |
| chr12:72342228 | 12  | 72.34223 | 0.020744439 | Credible Set | purple |
| chr12:72372220 | 12  | 72.37222 | 0.035303028 | Credible Set | purple |
| chr12:72389901 | 12  | 72.38990 | 0.035282384 | Credible Set | purple |
| chr12:72404532 | 12  | 72.40453 | 0.051569904 | Credible Set | purple |
| chr12:72430018 | 12  | 72.43002 | 0.028832638 | Credible Set | purple |
| chr12:72432423 | 12  | 72.43242 | 0.022760314 | Credible Set | purple |
| chr12:72503712 | 12  | 72.50371 | 0.017448019 | Credible Set | purple |
| chr12:72530507 | 12  | 72.53051 | 0.027468994 | Credible Set | purple |
| chr12:72531030 | 12  | 72.53103 | 0.019107273 | Credible Set | purple |
| chr12:72531036 | 12  | 72.53104 | 0.018537023 | Credible Set | purple |
| chr12:72534336 | 12  | 72.53434 | 0.032352122 | Credible Set | purple |
| chr12:72542646 | 12  | 72.54265 | 0.039247508 | Credible Set | purple |
| chr12:72542706 | 12  | 72.54271 | 0.034964712 | Credible Set | purple |
| chr12:72543184 | 12  | 72.54318 | 0.058214784 | Credible Set | purple |
| chr12:72543205 | 12  | 72.54321 | 0.055352205 | Credible Set | purple |
| chr12:72551877 | 12  | 72.55188 | 0.053745692 | Credible Set | purple |
| chr12:72582082 | 12  | 72.58208 | 0.050431926 | Credible Set | purple |
| chr12:72761155 | 12  | 72.76116 | 0.070149570 | Credible Set | purple |
| chr12:72803219 | 12  | 72.80322 | 0.058077048 | Credible Set | purple |
| chr12:72820664 | 12  | 72.82066 | 0.003091247 | Credible Set | purple |
| chr12:72948661 | 12  | 72.94866 | 0.006497966 | Credible Set | purple |
| chr12:72960023 | 12  | 72.96002 | 0.006766562 | Credible Set | purple |
| chr12:73012360 | 12  | 73.01236 | 0.006588722 | Credible Set | purple |
| chr12:73046310 | 12  | 73.04631 | 0.006532534 | Credible Set | purple |
| chr12:73088646 | 12  | 73.08865 | 0.006792230 | Credible Set | purple |
| chr12:73144833 | 12  | 73.14483 | 0.006777596 | Credible Set | purple |

# Fine-mapping Regions

| snp            | chr | pos (Mb) | pp          | group        | color  |
|----------------|-----|----------|-------------|--------------|--------|
| chr12:73160141 | 12  | 73.16014 | 0.006973151 | Credible Set | purple |
| chr12:73182054 | 12  | 73.18205 | 0.005897369 | Credible Set | purple |
| chr12:73200528 | 12  | 73.20053 | 0.005957969 | Credible Set | purple |
| chr12:73287081 | 12  | 73.28708 | 0.005871430 | Credible Set | purple |
| chr12:73293245 | 12  | 73.29324 | 0.004042649 | Credible Set | purple |
| chr12:73293285 | 12  | 73.29328 | 0.004179006 | Credible Set | purple |
| chr12:73293811 | 12  | 73.29381 | 0.007219253 | Credible Set | purple |
| chr12:73293812 | 12  | 73.29381 | 0.006934058 | Credible Set | purple |
| chr12:73294375 | 12  | 73.29438 | 0.007853504 | Credible Set | purple |
| chr12:73301700 | 12  | 73.30170 | 0.006913792 | Credible Set | purple |
| chr12:73320679 | 12  | 73.32068 | 0.004514037 | Credible Set | purple |
| chr12:73320695 | 12  | 73.32070 | 0.004514037 | Credible Set | purple |
| chr12:73320730 | 12  | 73.32073 | 0.004941685 | Credible Set | purple |
| chr12:73390527 | 12  | 73.39053 | 0.003172300 | Credible Set | purple |
| chr12:73409987 | 12  | 73.40999 | 0.003174178 | Credible Set | purple |
| chr12:73409994 | 12  | 73.40999 | 0.003175461 | Credible Set | purple |
| chr12:73410037 | 12  | 73.41004 | 0.005585985 | Credible Set | purple |
| chr12:73449146 | 12  | 73.44915 | 0.004169872 | Credible Set | purple |

F34 GBS, retic parameters cell hemoglobin concentration mean

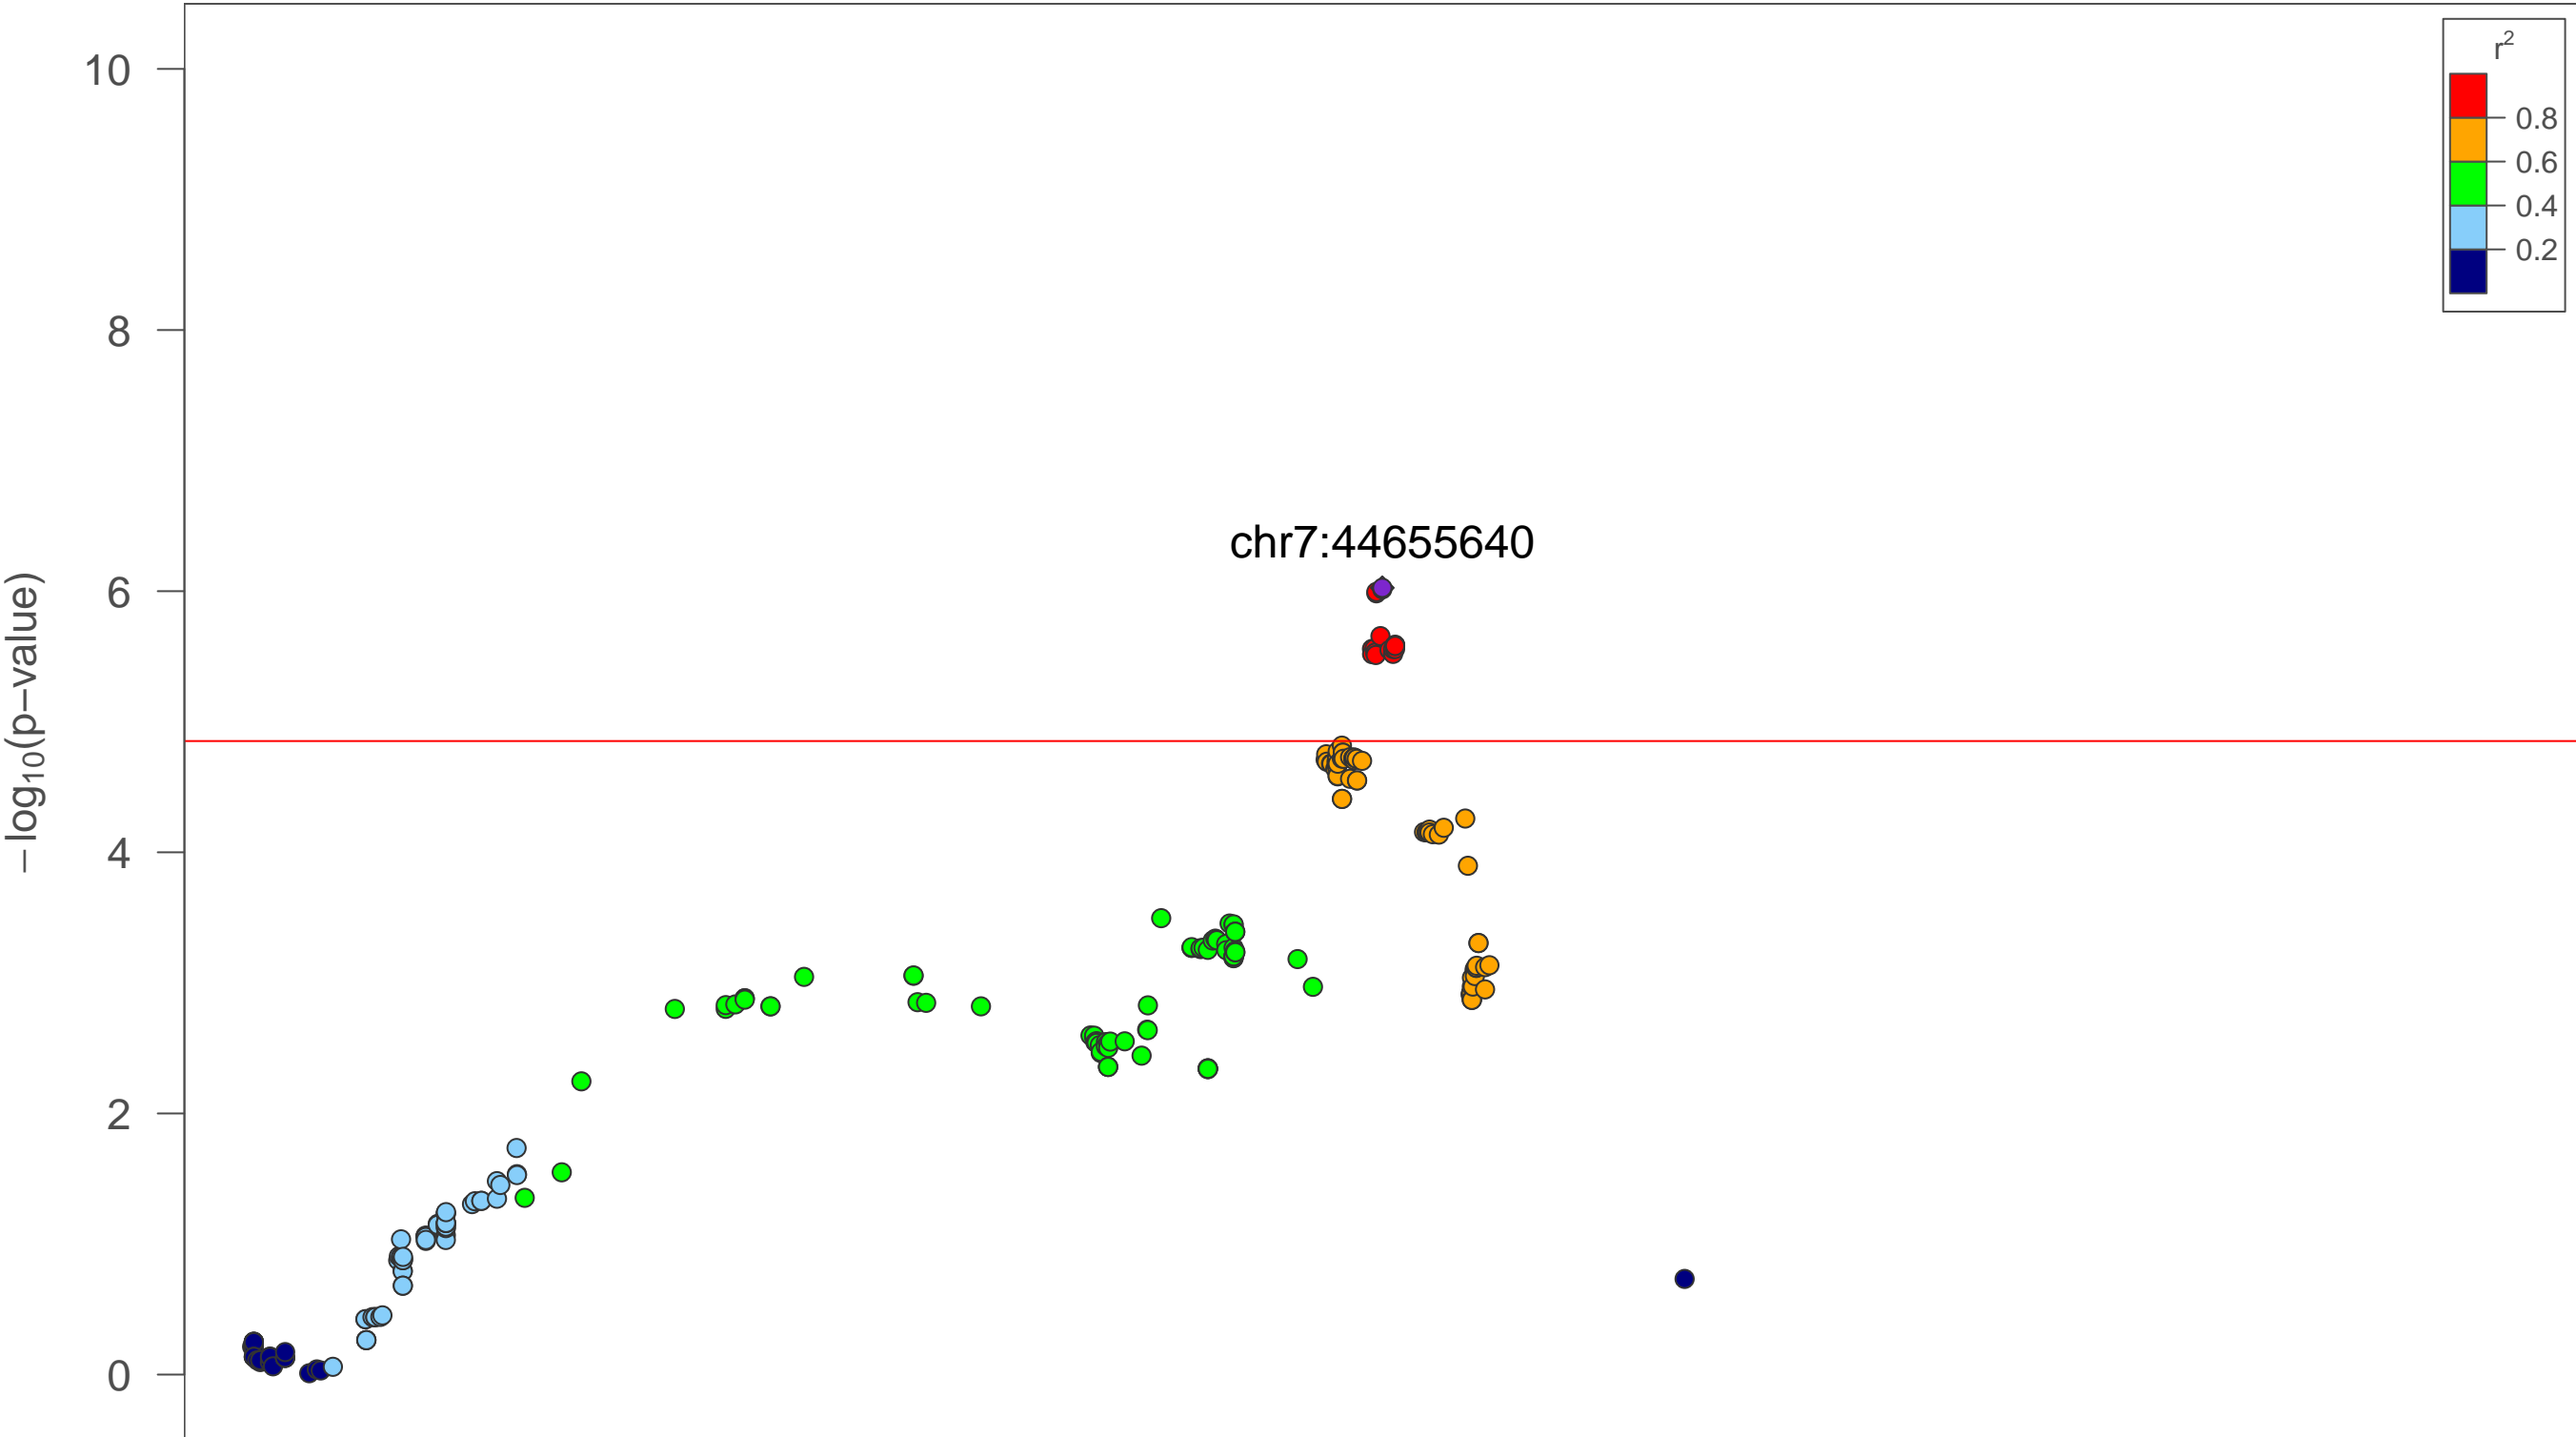

Credible Set

4933402C06Rik → ← Vmn2r58 ← Vmn2r62 ← Cd33 Klk1b3 → Il4i1 → Ntf5 → Nomo1 → ← Saa1 ← Mrgpra3 ← Mrgprb1 Nav2 →  
← A230077H06Rik ← Vmn2r59 ← Vmn2r63 Ctu1 → ← Acpt ← Atf5 Hrc → ← Emp3 ← Tph1 ← Mrgpra2a Mrgprb8 → ← Dbx1  
Vstm2b → Vmn2r60 → Gm9268 → Klk12 → Syt3 → Ifr3 → Bcat2 → Otog → Ldhc → ← Mrgpra4 ← Csrp3  
4930433I11Rik → Vmn2r61 → Zfp936 → Klk6 → Lrrc4b → ← Fcgrt Ntn5 → Munc → ← Ptpn5 ← Mrgprx1 ← E2f8

197 genes  
omitted

Position on chr7 (Mb)

date: Thu Oct 25 17:06:00 2018

build: F34GBS

display range: chr7:39655640–49655640 [39655640–49655640]

hilite range: 0 – 0 [ 0 – 0 ]

reference SNP: chr7:44655640

number of SNPs plotted: 247

min P-value: 9.42E-7 [chr7:44655640]

max P-value: 9.76E-1 [chr7:40177351]

omitted Genes: Gm4884, 1700110I07Rik, Gm5592

omitted Genes: AI987944, Vmn2r57, AW146154

omitted Genes: Zfp788, Vmn2r-ps54, Vmn2r-ps60

omitted Genes: 4933421I07Rik, Zfp141, 9830147E19Rik

omitted Genes: Gm5595, Gm2381, EU599041

omitted Genes: Zfp715, Siglecf, Siglecg

omitted Genes: Lim2, Nkg7, Cldnd2

omitted Genes: Etfb, Mir7051, Vsig10l

omitted Genes: Iglon5, 4931406B18Rik, Zfp658

omitted Genes: Zfp719, Zfp819, Ceacam18

omitted Genes: Siglece, Klk14, Klk13

omitted Genes: 2310002F09Rik, Klk11, Klk10

omitted Genes: Klk9, Klk8, Klk7

omitted Genes: Klk5, Klk4, Klk15

omitted Genes: Klk1b7-ps, Klk1b8, Klk1b1

omitted Genes: Klk1b9, Klk1b11, Klk1b26

omitted Genes: Klk1b27, Klk1b21, Klk1b22

omitted Genes: Klk1b16, Klk1b24, Klk1b4

omitted Genes: Klk1b5, Klk1, 1700028J19Rik

omitted Genes: 2410002F23Rik, Snord88c, Snord88a

omitted Genes: Clec11a, Shank1, 1700008O03Rik

omitted Genes: Aspdh, Josd2, Mir7052

omitted Genes: 5430431A17Rik, Emc10, Fam71e1

omitted Genes: Mybpc2, Spib, Pold1

omitted Genes: Mir7053, Nr1h2, Napsa

omitted Genes: Kcnc3, Myh14, Izumo2

omitted Genes: Zfp473, Vrk3, Nup62

omitted Genes: Gm21948, Tbc1d17, Akt1s1

omitted Genes: Mir707, Pnkp, Ptov1

omitted Genes: Med25, Fuz, Ap2a1

omitted Genes: Tsks, Cpt1c, Prrm1

omitted Genes: Gm15545, Rpl2l12, Scf1

Make more plots at <http://csg.sph.umich.edu/locuszoom/>



## Fine-mapping Regions

| snp           | chr | pos (Mb) | pp         | group        | color  |
|---------------|-----|----------|------------|--------------|--------|
| chr7:44612740 | 7   | 44.61274 | 0.04019643 | Credible Set | purple |
| chr7:44613080 | 7   | 44.61308 | 0.03673297 | Credible Set | purple |
| chr7:44623189 | 7   | 44.62319 | 0.04042732 | Credible Set | purple |
| chr7:44625757 | 7   | 44.62576 | 0.03771995 | Credible Set | purple |
| chr7:44628444 | 7   | 44.62844 | 0.03622587 | Credible Set | purple |
| chr7:44630865 | 7   | 44.63087 | 0.10304051 | Credible Set | purple |
| chr7:44630890 | 7   | 44.63089 | 0.10554906 | Credible Set | purple |
| chr7:44647914 | 7   | 44.64791 | 0.04987531 | Credible Set | purple |
| chr7:44655619 | 7   | 44.65562 | 0.11031480 | Credible Set | purple |
| chr7:44655640 | 7   | 44.65564 | 0.11308659 | Credible Set | purple |
| chr7:44685749 | 7   | 44.68575 | 0.03943631 | Credible Set | purple |
| chr7:44700610 | 7   | 44.70061 | 0.03691384 | Credible Set | purple |
| chr7:44700692 | 7   | 44.70069 | 0.04008230 | Credible Set | purple |
| chr7:44708823 | 7   | 44.70882 | 0.04008230 | Credible Set | purple |
| chr7:44708981 | 7   | 44.70898 | 0.04271153 | Credible Set | purple |
| chr7:44708990 | 7   | 44.70899 | 0.04311534 | Credible Set | purple |
| chr7:44708997 | 7   | 44.70900 | 0.04224478 | Credible Set | purple |
| chr7:44709016 | 7   | 44.70902 | 0.04224478 | Credible Set | purple |

F34 GBS, retic parameters cell hemoglobin concentration mean

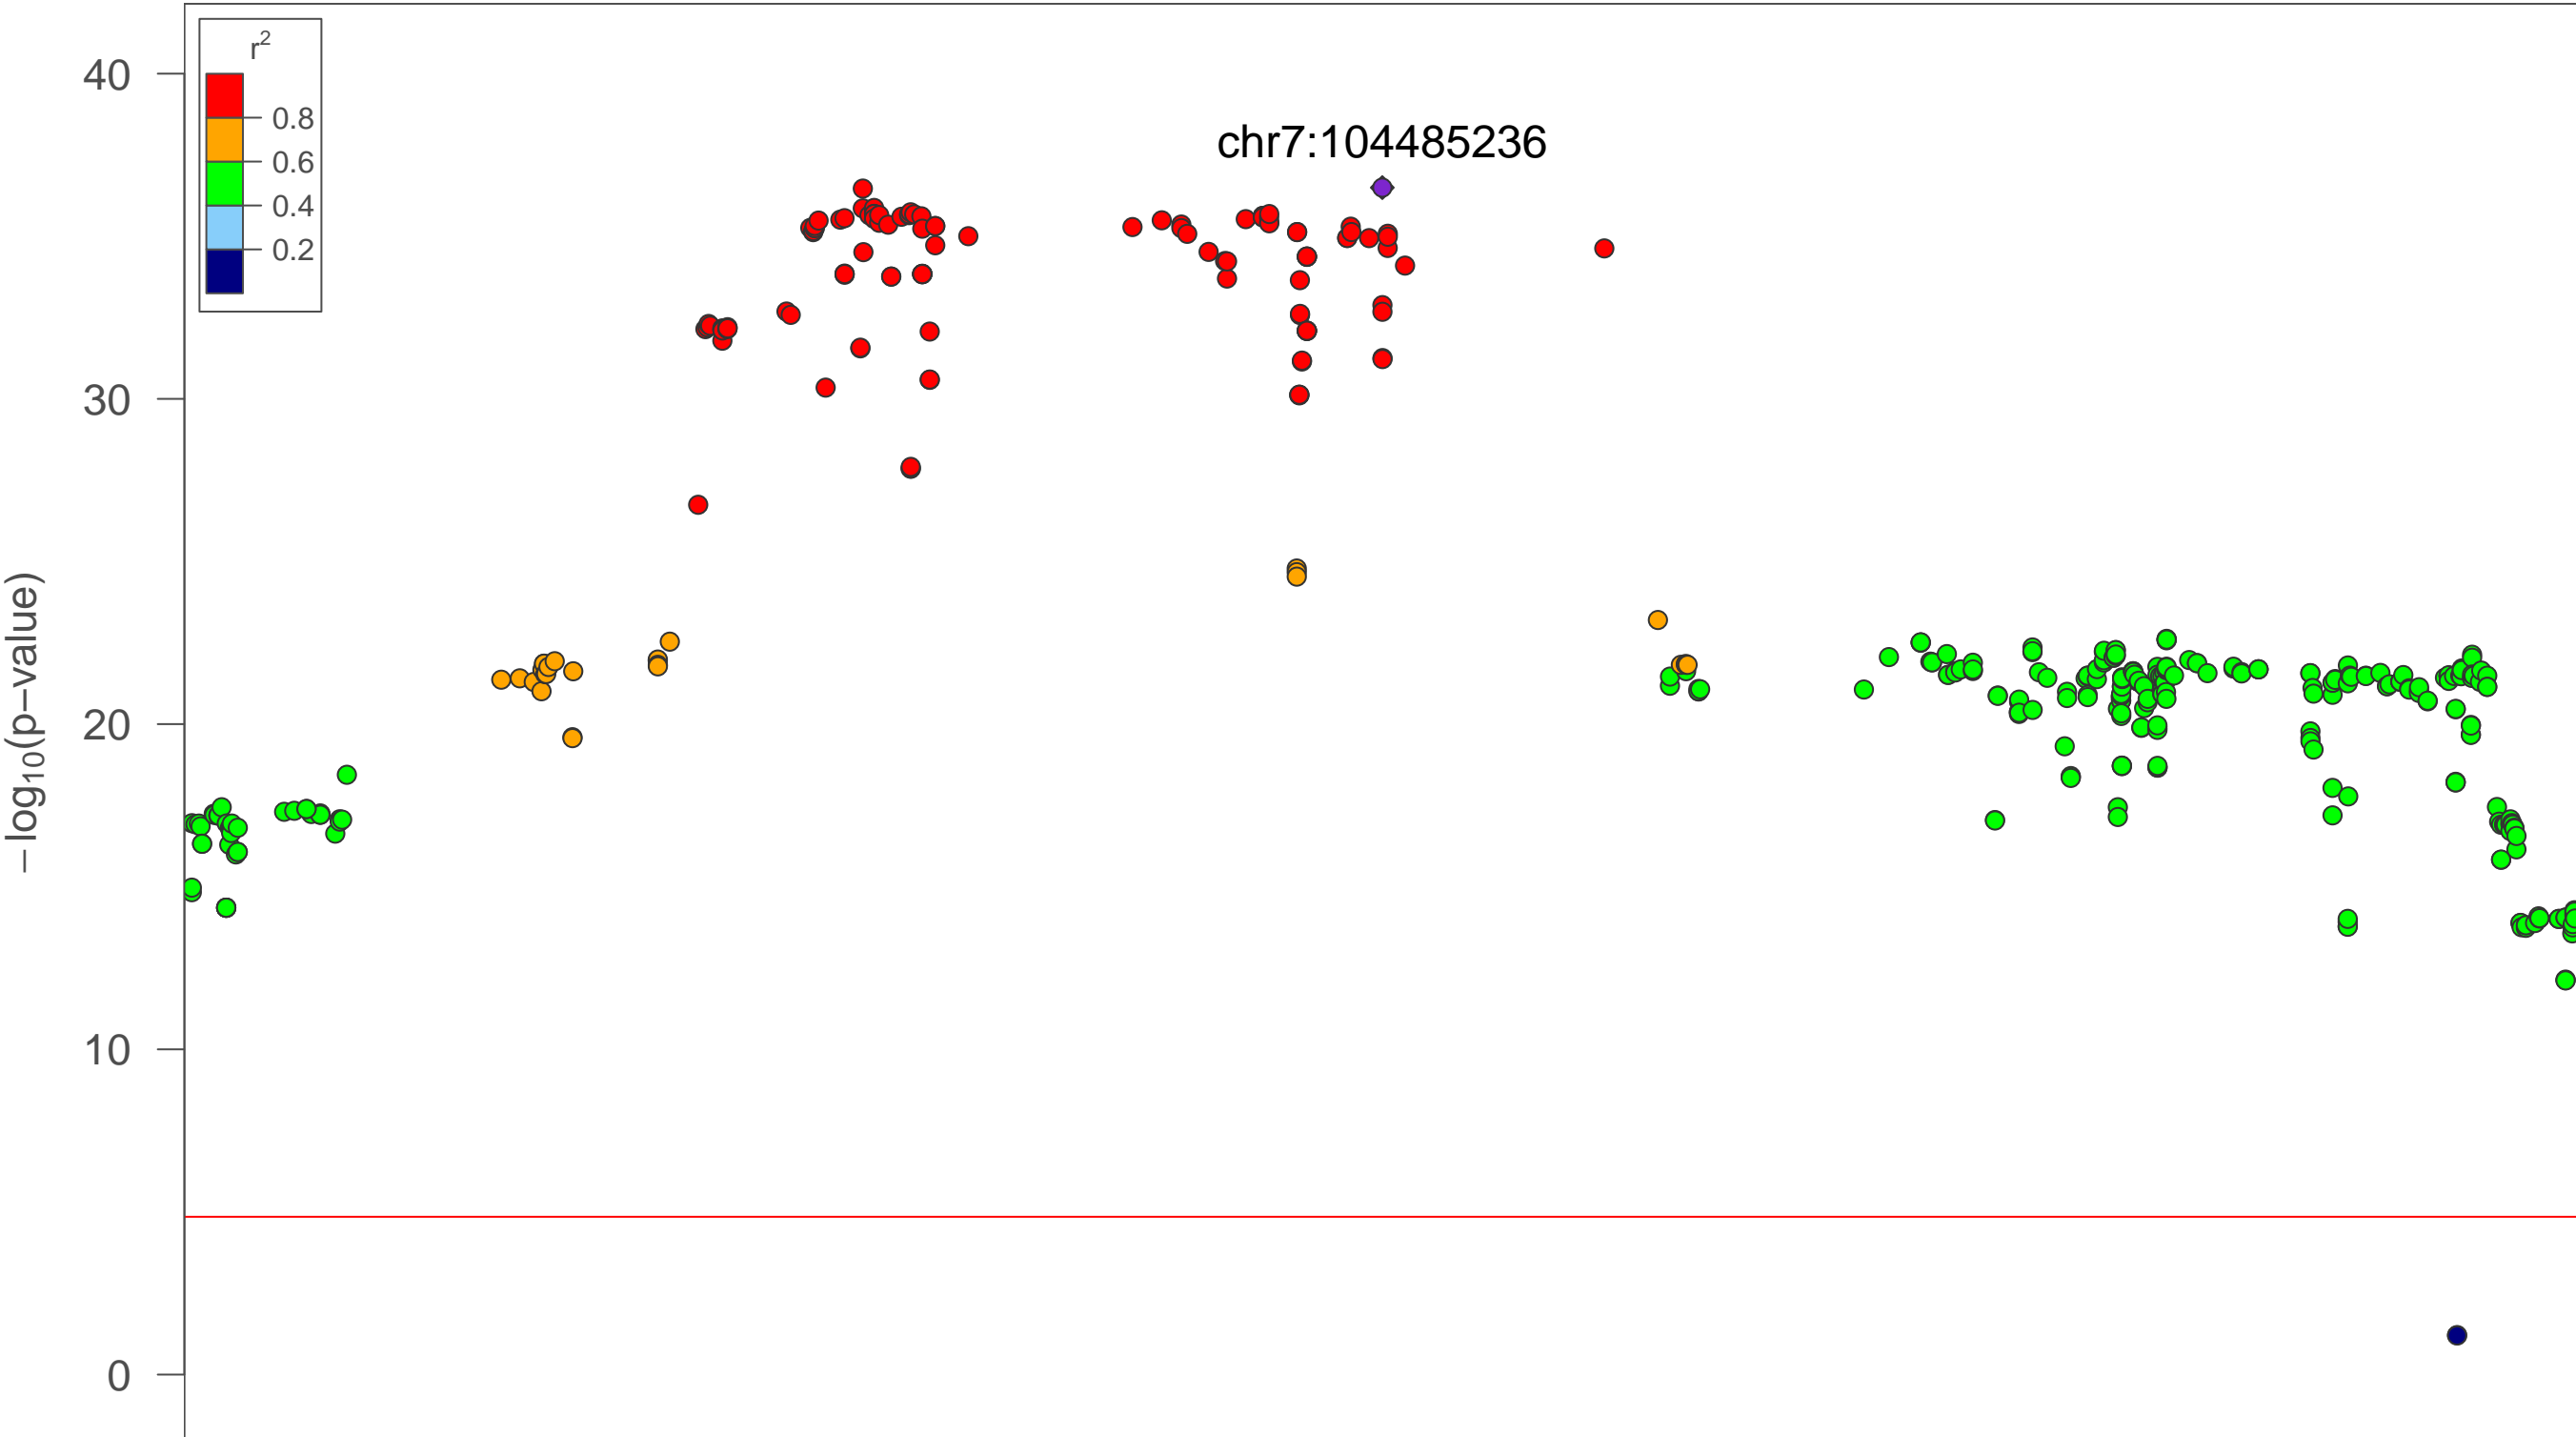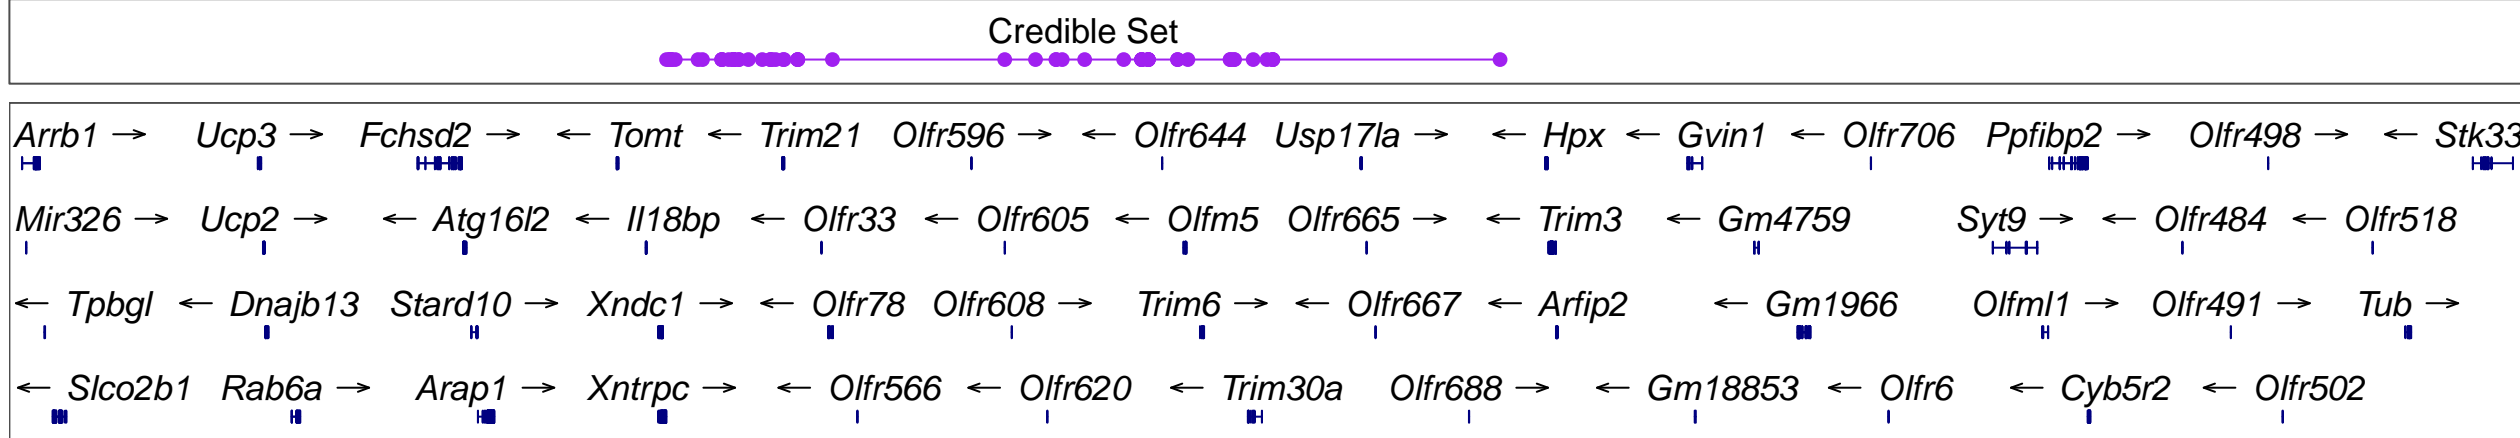

269 genes omitted

date: Thu Oct 25 17:05:47 2018

build: F34GBS

display range: chr7:99485236–109485236 [99485236–109485236]

hilite range: 0 – 0 [ 0 – 0 ]

reference SNP: chr7:104485236

number of SNPs plotted: 448

min P-value: 3.19E–37 [chr7:104485236]

max P-value: 6.26E–2 [chr7:108970724]

omitted Genes: Olfr520, Olfr521, Neu3

omitted Genes: Spcs2, Xrra1, Rnf169

omitted Genes: Chrdl2, Pold3, Lipt2

omitted Genes: Kcne3, Pgm2l1, Gpx2-ps1

omitted Genes: P4ha3, Ppme1, C2cd3

omitted Genes: Coa4, Mrpl48, Plekha1

omitted Genes: Fam168a, Relt, Arhgef17

omitted Genes: Mir3102, P2ry6, P2ry2

omitted Genes: Pde2a, Mir139, Art2a-ps

omitted Genes: Art2b, Clpb, Phox2a

omitted Genes: Inpp1, Folr2, Folr1

omitted Genes: Anapc15, Lamtor1, Lrrc51

omitted Genes: Numa1, Rnf121, Trpc2

omitted Genes: Art5, Art1, Chrna10

omitted Genes: Nup98, Pgap2, Rhog

omitted Genes: Stim1, Rrm1, Olfr543

omitted Genes: Olfr544, Olfr545, Olfr547

omitted Genes: Olfr549, Olfr550, Olfr551

omitted Genes: Olfr552, Olfr553, Olfr554

omitted Genes: Olfr555, Olfr556, Trim68

omitted Genes: Olfr557, Olfr558, Olfr559

omitted Genes: Olfr560, Olfr561, Olfr564

omitted Genes: Olfr568, Olfr569, Olfr570

omitted Genes: Olfr571, Olfr572, Olfr574

omitted Genes: Olfr575, Olfr576, Olfr577

omitted Genes: Olfr578, Olfr582, Olfr583

omitted Genes: Olfr584, Olfr585, Olfr586

omitted Genes: Olfr589, Olfr591, Olfr592

omitted Genes: Olfr593, Olfr594, Usp17ld

omitted Genes: Olfr597, Olfr598, Olfr599

omitted Genes: Olfr600, Olfr601, Olfr603

omitted Genes: Usp17lc, Olfr606, Olfr609

Make more plots at <http://csg.sph.umich.edu/locuszoom/>

## Fine-mapping Regions

| snp            | chr | pos (Mb) | pp          | group        | color  |
|----------------|-----|----------|-------------|--------------|--------|
| chr7:102098054 | 7   | 102.0981 | 0.008086265 | Credible Set | purple |
| chr7:102110109 | 7   | 102.1101 | 0.006000914 | Credible Set | purple |
| chr7:102110501 | 7   | 102.1105 | 0.006483575 | Credible Set | purple |
| chr7:102116318 | 7   | 102.1163 | 0.007997225 | Credible Set | purple |
| chr7:102116430 | 7   | 102.1164 | 0.007997225 | Credible Set | purple |
| chr7:102116478 | 7   | 102.1165 | 0.009340079 | Credible Set | purple |
| chr7:102132562 | 7   | 102.1326 | 0.013561780 | Credible Set | purple |
| chr7:102223396 | 7   | 102.2234 | 0.014473276 | Credible Set | purple |
| chr7:102240695 | 7   | 102.2407 | 0.016062135 | Credible Set | purple |
| chr7:102317213 | 7   | 102.3172 | 0.031915585 | Credible Set | purple |
| chr7:102317246 | 7   | 102.3172 | 0.128817713 | Credible Set | purple |
| chr7:102319586 | 7   | 102.3196 | 0.001470396 | Credible Set | purple |
| chr7:102344970 | 7   | 102.3450 | 0.019659537 | Credible Set | purple |
| chr7:102363897 | 7   | 102.3639 | 0.015557967 | Credible Set | purple |
| chr7:102364204 | 7   | 102.3642 | 0.027955625 | Credible Set | purple |
| chr7:102364223 | 7   | 102.3642 | 0.032978368 | Credible Set | purple |
| chr7:102364315 | 7   | 102.3643 | 0.021621776 | Credible Set | purple |
| chr7:102364326 | 7   | 102.3643 | 0.021621776 | Credible Set | purple |
| chr7:102364411 | 7   | 102.3644 | 0.015597870 | Credible Set | purple |
| chr7:102385520 | 7   | 102.3855 | 0.011607758 | Credible Set | purple |
| chr7:102385536 | 7   | 102.3855 | 0.019966710 | Credible Set | purple |
| chr7:102423165 | 7   | 102.4232 | 0.010141303 | Credible Set | purple |
| chr7:102478469 | 7   | 102.4785 | 0.017703605 | Credible Set | purple |
| chr7:102510475 | 7   | 102.5105 | 0.019860576 | Credible Set | purple |
| chr7:102510607 | 7   | 102.5106 | 0.021177480 | Credible Set | purple |
| chr7:102516878 | 7   | 102.5169 | 0.024302819 | Credible Set | purple |
| chr7:102531652 | 7   | 102.5317 | 0.021019403 | Credible Set | purple |
| chr7:102561708 | 7   | 102.5617 | 0.018269972 | Credible Set | purple |
| chr7:102565410 | 7   | 102.5654 | 0.007652250 | Credible Set | purple |
| chr7:102619418 | 7   | 102.6194 | 0.009260030 | Credible Set | purple |
| chr7:102619431 | 7   | 102.6194 | 0.009201823 | Credible Set | purple |
| chr7:102619466 | 7   | 102.6195 | 0.002380883 | Credible Set | purple |
| chr7:102757499 | 7   | 102.7575 | 0.004519018 | Credible Set | purple |
| chr7:103442570 | 7   | 103.4426 | 0.008593713 | Credible Set | purple |
| chr7:103564836 | 7   | 103.5648 | 0.013800293 | Credible Set | purple |
| chr7:103646439 | 7   | 103.6464 | 0.010268750 | Credible Set | purple |

## Fine-mapping Regions

| snp            | chr | pos (Mb) | pp          | group        | color  |
|----------------|-----|----------|-------------|--------------|--------|
| chr7:103646709 | 7   | 103.6467 | 0.007973212 | Credible Set | purple |
| chr7:103671033 | 7   | 103.6710 | 0.005323470 | Credible Set | purple |
| chr7:103760301 | 7   | 103.7603 | 0.001495665 | Credible Set | purple |
| chr7:103915503 | 7   | 103.9155 | 0.015003463 | Credible Set | purple |
| chr7:103986792 | 7   | 103.9868 | 0.018843635 | Credible Set | purple |
| chr7:103986795 | 7   | 103.9868 | 0.018843635 | Credible Set | purple |
| chr7:103986857 | 7   | 103.9869 | 0.017031546 | Credible Set | purple |
| chr7:103986860 | 7   | 103.9869 | 0.017031546 | Credible Set | purple |
| chr7:104012808 | 7   | 104.0128 | 0.016708489 | Credible Set | purple |
| chr7:104013370 | 7   | 104.0134 | 0.011923804 | Credible Set | purple |
| chr7:104013395 | 7   | 104.0134 | 0.011183186 | Credible Set | purple |
| chr7:104013467 | 7   | 104.0135 | 0.021486394 | Credible Set | purple |
| chr7:104129734 | 7   | 104.1297 | 0.006038278 | Credible Set | purple |
| chr7:104129736 | 7   | 104.1297 | 0.006038278 | Credible Set | purple |
| chr7:104170618 | 7   | 104.1706 | 0.001081113 | Credible Set | purple |
| chr7:104338784 | 7   | 104.3388 | 0.004006456 | Credible Set | purple |
| chr7:104338810 | 7   | 104.3388 | 0.003972653 | Credible Set | purple |
| chr7:104353491 | 7   | 104.3535 | 0.008827808 | Credible Set | purple |
| chr7:104356230 | 7   | 104.3562 | 0.006046661 | Credible Set | purple |
| chr7:104430205 | 7   | 104.4302 | 0.003941042 | Credible Set | purple |
| chr7:104485236 | 7   | 104.4852 | 0.137614778 | Credible Set | purple |
| chr7:104507724 | 7   | 104.5077 | 0.001975080 | Credible Set | purple |
| chr7:104508127 | 7   | 104.5081 | 0.005362379 | Credible Set | purple |
| chr7:104508173 | 7   | 104.5082 | 0.004347901 | Credible Set | purple |
| chr7:105411752 | 7   | 105.4118 | 0.001912813 | Credible Set | purple |

# F34 GBS, retic parameters concentration of hemoglobin in reticulocytes, repeat

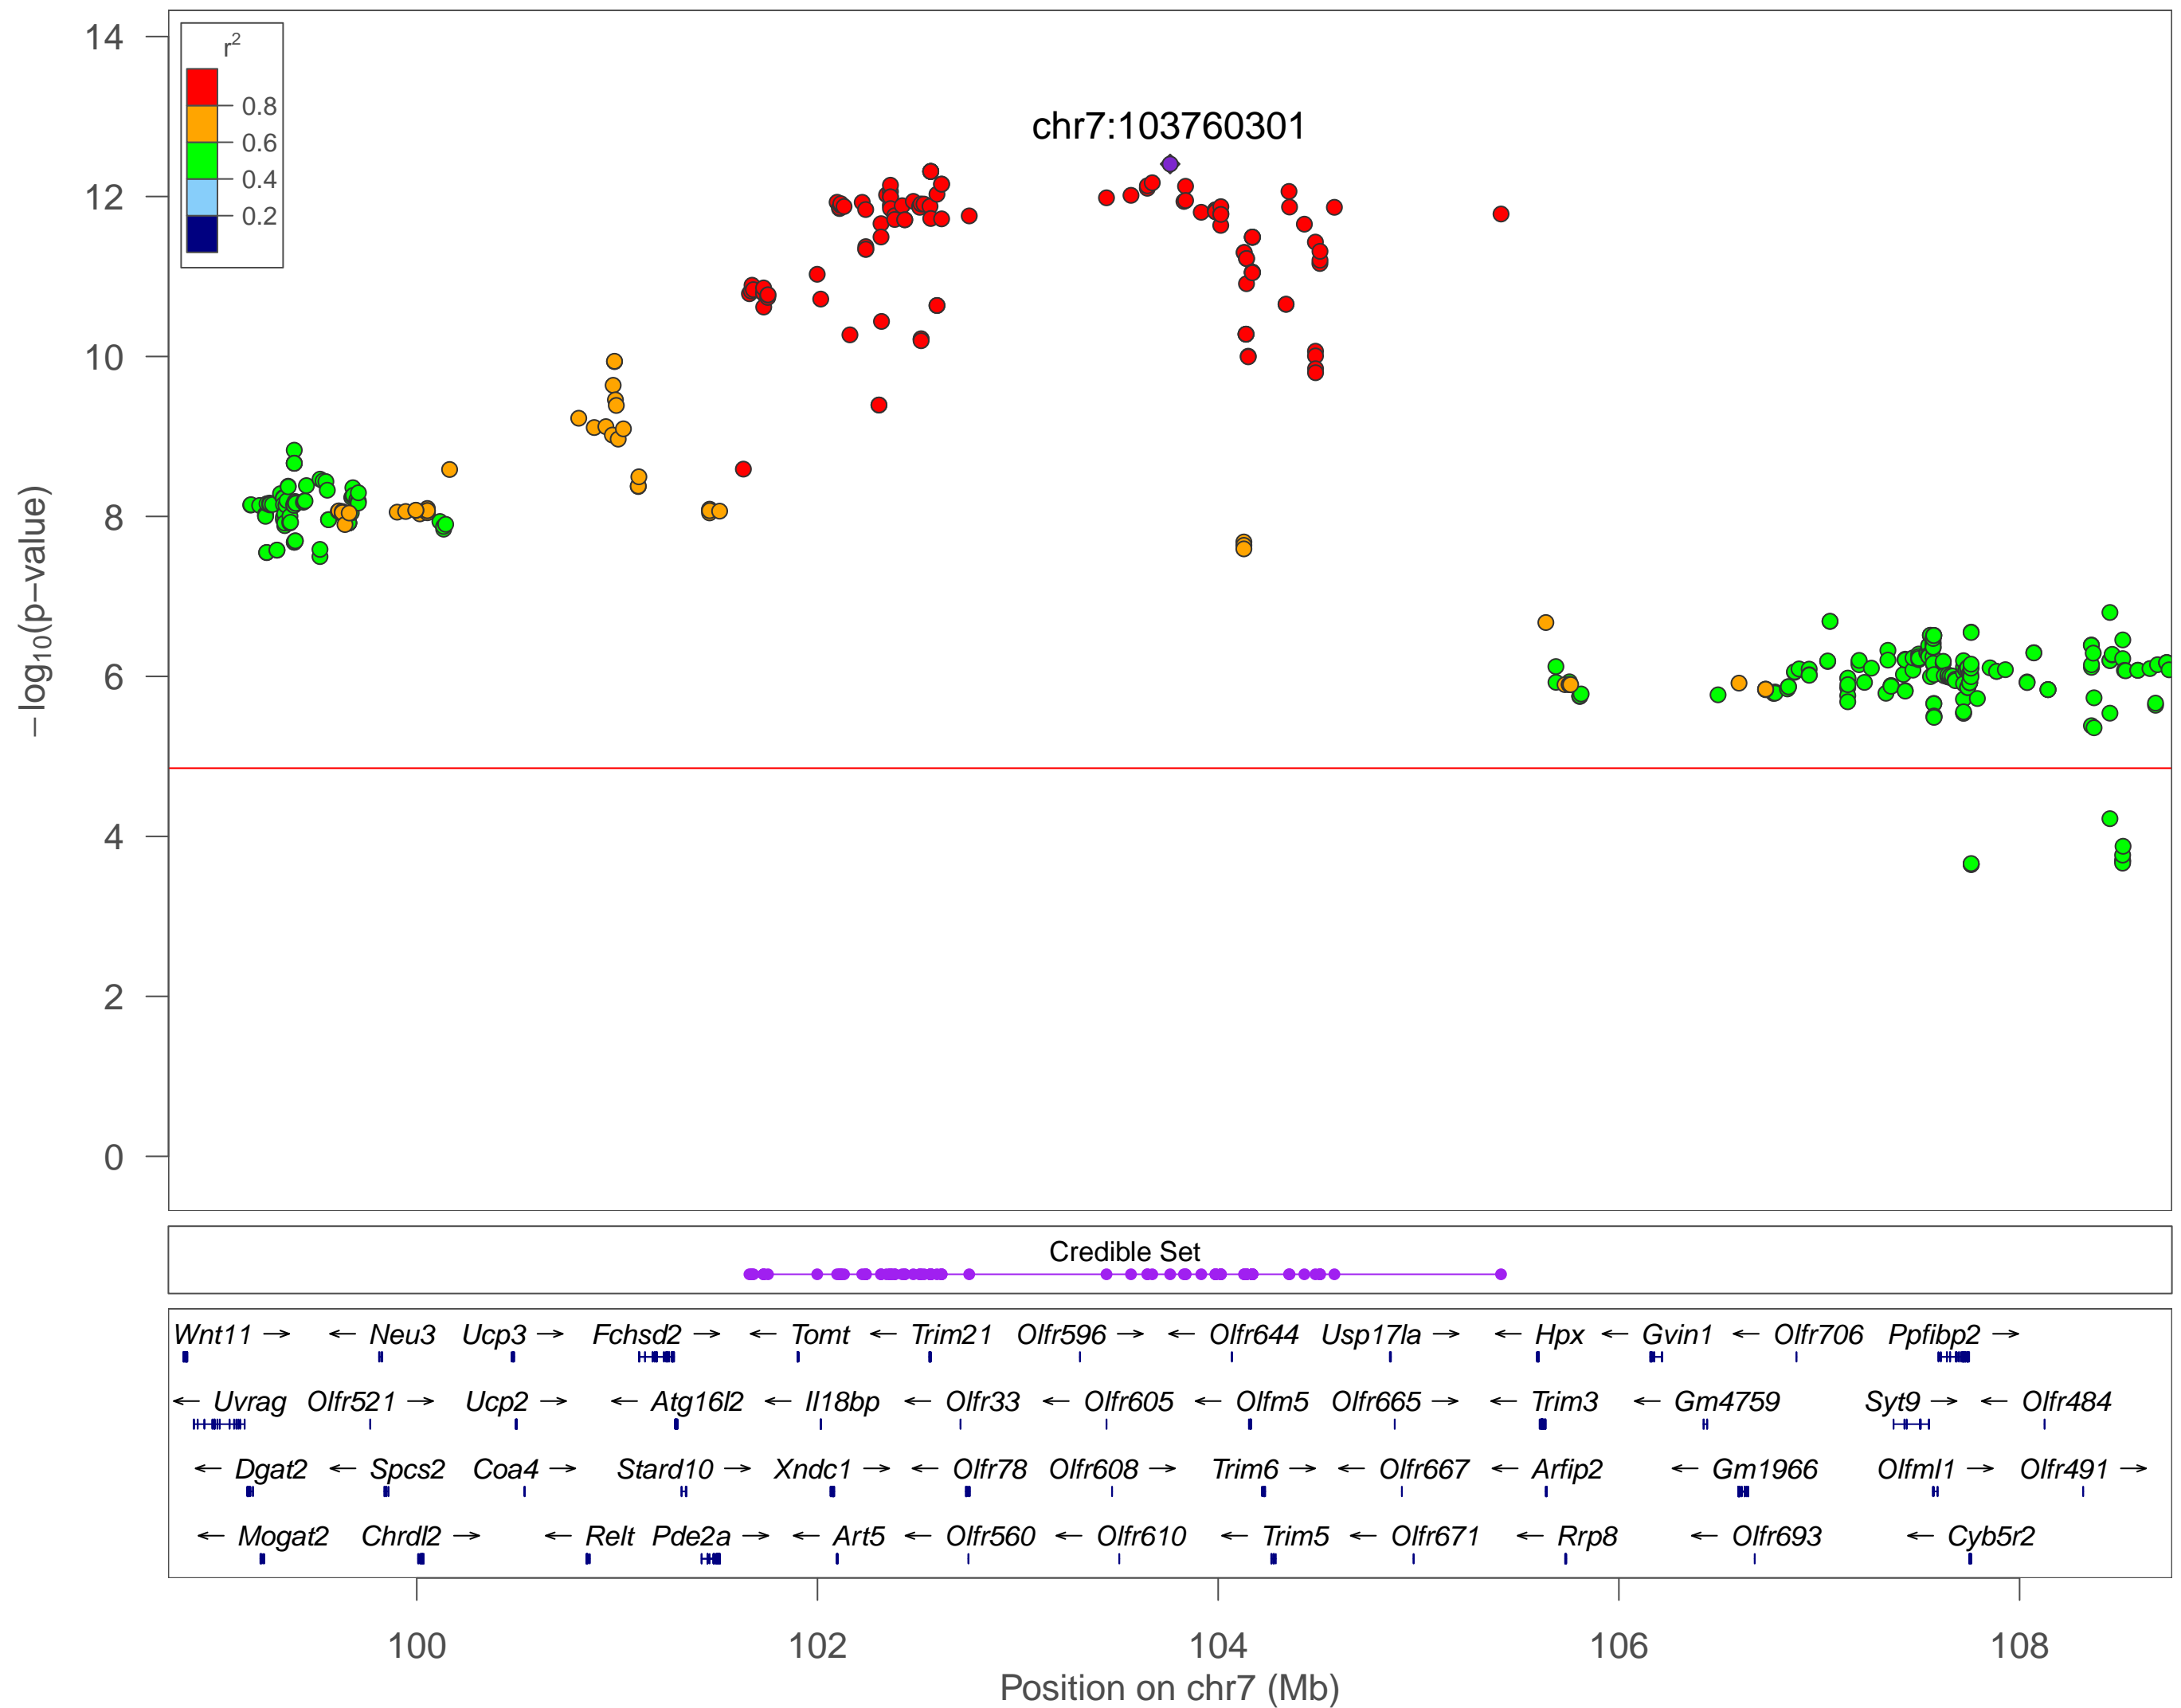

date: Thu Oct 25 17:06:40 2018

build: F34GBS

display range: chr7:98760301–108760301 [98760301–108760301]

hilite range: 0 – 0 [ 0 – 0 ]

reference SNP: chr7:103760301

number of SNPs plotted: 417

min P-value: 3.92E–13 [chr7:103760301]

max P-value: 2.25E–4 [chr7:107758350]

omitted Genes: Gm26705, Map6, Serpinh1

omitted Genes: Gdpd5, Khlh35, Rps3

omitted Genes: Snord15b, Snord15a, Arrb1

omitted Genes: Mir326, Tpbgl, Slco2b1

omitted Genes: Olfr520, Xrra1, Rnf169

omitted Genes: Pold3, Lipt2, Kcne3

omitted Genes: Pgm2l1, Gpx2-ps1, P4ha3

omitted Genes: Ppme1, C2cd3, Dnajb13

omitted Genes: Mrpl48, Rab6a, Plekhhb1

omitted Genes: Fam168a, Arhgef17, Mir3102

omitted Genes: P2ry6, P2ry2, Arap1

omitted Genes: Mir139, Art2a-ps, Art2b

omitted Genes: Clpb, Phox2a, Inpp1

omitted Genes: Folr2, Folr1, Anapc15

omitted Genes: Lamtor1, Lrrc51, Numa1

omitted Genes: Rnf121, Xntrpc, Trpc2

omitted Genes: Art1, Chrna10, Nup98

omitted Genes: Pgap2, Rhog, Stim1

omitted Genes: Rrm1, Olfr543, Olfr544

omitted Genes: Olfr545, Olfr547, Olfr549

omitted Genes: Olfr550, Olfr551, Olfr552

omitted Genes: Olfr553, Olfr554, Olfr555

omitted Genes: Olfr556, Trim68, Olfr557

omitted Genes: Olfr558, Olfr559, Olfr561

omitted Genes: Olfr564, Olfr566, Olfr568

omitted Genes: Olfr569, Olfr570, Olfr571

omitted Genes: Olfr572, Olfr574, Olfr575

omitted Genes: Olfr576, Olfr577, Olfr578

omitted Genes: Olfr582, Olfr583, Olfr584

omitted Genes: Olfr585, Olfr586, Olfr589

omitted Genes: Olfr591, Olfr592, Olfr593

omitted Genes: Olfr594, Ucp17ld, Olfr597

Make more plots at <http://csg.sph.umich.edu/locuszoom/>

## Fine-mapping Regions

| snp            | chr | pos (Mb) | pp           | group        | color  |
|----------------|-----|----------|--------------|--------------|--------|
| chr7:101660383 | 7   | 101.6604 | 0.0009929434 | Credible Set | purple |
| chr7:101669186 | 7   | 101.6692 | 0.0010713666 | Credible Set | purple |
| chr7:101673483 | 7   | 101.6735 | 0.0012617061 | Credible Set | purple |
| chr7:101680140 | 7   | 101.6801 | 0.0011142265 | Credible Set | purple |
| chr7:101731061 | 7   | 101.7311 | 0.0010041356 | Credible Set | purple |
| chr7:101731110 | 7   | 101.7311 | 0.0010118919 | Credible Set | purple |
| chr7:101731130 | 7   | 101.7311 | 0.0011696765 | Credible Set | purple |
| chr7:101752971 | 7   | 101.7530 | 0.0009629975 | Credible Set | purple |
| chr7:101998679 | 7   | 101.9987 | 0.0017175575 | Credible Set | purple |
| chr7:102098054 | 7   | 102.0981 | 0.0131280765 | Credible Set | purple |
| chr7:102110109 | 7   | 102.1101 | 0.0109895379 | Credible Set | purple |
| chr7:102110501 | 7   | 102.1105 | 0.0112663096 | Credible Set | purple |
| chr7:102116318 | 7   | 102.1163 | 0.0120776507 | Credible Set | purple |
| chr7:102116430 | 7   | 102.1164 | 0.0120776507 | Credible Set | purple |
| chr7:102116478 | 7   | 102.1165 | 0.0125998291 | Credible Set | purple |
| chr7:102132562 | 7   | 102.1326 | 0.0116375091 | Credible Set | purple |
| chr7:102223396 | 7   | 102.2234 | 0.0130936504 | Credible Set | purple |
| chr7:102240695 | 7   | 102.2407 | 0.0106787116 | Credible Set | purple |
| chr7:102241191 | 7   | 102.2412 | 0.0037464787 | Credible Set | purple |
| chr7:102241211 | 7   | 102.2412 | 0.0034665230 | Credible Set | purple |
| chr7:102241212 | 7   | 102.2412 | 0.0034817014 | Credible Set | purple |
| chr7:102317213 | 7   | 102.3172 | 0.0071701726 | Credible Set | purple |
| chr7:102317246 | 7   | 102.3172 | 0.0049213778 | Credible Set | purple |
| chr7:102344970 | 7   | 102.3450 | 0.0161887131 | Credible Set | purple |
| chr7:102363897 | 7   | 102.3639 | 0.0120464049 | Credible Set | purple |
| chr7:102364204 | 7   | 102.3642 | 0.0177104280 | Credible Set | purple |
| chr7:102364223 | 7   | 102.3642 | 0.0212434342 | Credible Set | purple |
| chr7:102364315 | 7   | 102.3643 | 0.0152663070 | Credible Set | purple |
| chr7:102364326 | 7   | 102.3643 | 0.0152663070 | Credible Set | purple |
| chr7:102364411 | 7   | 102.3644 | 0.0109717078 | Credible Set | purple |
| chr7:102385520 | 7   | 102.3855 | 0.0089801886 | Credible Set | purple |
| chr7:102385536 | 7   | 102.3855 | 0.0080702215 | Credible Set | purple |
| chr7:102423165 | 7   | 102.4232 | 0.0119005748 | Credible Set | purple |
| chr7:102435692 | 7   | 102.4357 | 0.0080011307 | Credible Set | purple |
| chr7:102435720 | 7   | 102.4357 | 0.0080011307 | Credible Set | purple |
| chr7:102478469 | 7   | 102.4785 | 0.0134630192 | Credible Set | purple |



## Fine-mapping Regions

| snp            | chr | pos (Mb) | pp          | group        | color  |
|----------------|-----|----------|-------------|--------------|--------|
| chr7:102510475 | 7   | 102.5105 | 0.011760647 | Credible Set | purple |
| chr7:102510607 | 7   | 102.5106 | 0.011380137 | Credible Set | purple |
| chr7:102516878 | 7   | 102.5169 | 0.012505242 | Credible Set | purple |
| chr7:102531652 | 7   | 102.5317 | 0.012456754 | Credible Set | purple |
| chr7:102561708 | 7   | 102.5617 | 0.011694669 | Credible Set | purple |
| chr7:102565262 | 7   | 102.5653 | 0.031327334 | Credible Set | purple |
| chr7:102565292 | 7   | 102.5653 | 0.031346426 | Credible Set | purple |
| chr7:102565307 | 7   | 102.5653 | 0.031369672 | Credible Set | purple |
| chr7:102565323 | 7   | 102.5653 | 0.031388803 | Credible Set | purple |
| chr7:102565329 | 7   | 102.5653 | 0.031388803 | Credible Set | purple |
| chr7:102565410 | 7   | 102.5654 | 0.008295208 | Credible Set | purple |
| chr7:102596442 | 7   | 102.5964 | 0.016460981 | Credible Set | purple |
| chr7:102619418 | 7   | 102.6194 | 0.021930790 | Credible Set | purple |
| chr7:102619431 | 7   | 102.6194 | 0.021874623 | Credible Set | purple |
| chr7:102619466 | 7   | 102.6195 | 0.008212079 | Credible Set | purple |
| chr7:102757499 | 7   | 102.7575 | 0.008925640 | Credible Set | purple |
| chr7:103442570 | 7   | 103.4426 | 0.014881387 | Credible Set | purple |
| chr7:103564836 | 7   | 103.5648 | 0.015953655 | Credible Set | purple |
| chr7:103646439 | 7   | 103.6464 | 0.019486914 | Credible Set | purple |
| chr7:103646709 | 7   | 103.6467 | 0.020896343 | Credible Set | purple |
| chr7:103671033 | 7   | 103.6710 | 0.022759804 | Credible Set | purple |
| chr7:103760301 | 7   | 103.7603 | 0.038647383 | Credible Set | purple |
| chr7:103829200 | 7   | 103.8292 | 0.013434031 | Credible Set | purple |
| chr7:103837099 | 7   | 103.8371 | 0.020615481 | Credible Set | purple |
| chr7:103837213 | 7   | 103.8372 | 0.013790586 | Credible Set | purple |
| chr7:103915503 | 7   | 103.9155 | 0.009890892 | Credible Set | purple |
| chr7:103986792 | 7   | 103.9868 | 0.010600819 | Credible Set | purple |
| chr7:103986795 | 7   | 103.9868 | 0.010600819 | Credible Set | purple |
| chr7:103986857 | 7   | 103.9869 | 0.010024565 | Credible Set | purple |
| chr7:103986860 | 7   | 103.9869 | 0.010024565 | Credible Set | purple |
| chr7:104012808 | 7   | 104.0128 | 0.006829287 | Credible Set | purple |
| chr7:104013370 | 7   | 104.0134 | 0.009540389 | Credible Set | purple |
| chr7:104013395 | 7   | 104.0134 | 0.011583584 | Credible Set | purple |
| chr7:104013467 | 7   | 104.0135 | 0.009304569 | Credible Set | purple |
| chr7:104129734 | 7   | 104.1297 | 0.003174973 | Credible Set | purple |
| chr7:104129736 | 7   | 104.1297 | 0.003174973 | Credible Set | purple |

Fine-mapping Regions

| snp            | chr | pos (Mb) | pp          | group        | color  |
|----------------|-----|----------|-------------|--------------|--------|
| chr7:104141343 | 7   | 104.1413 | 0.001317245 | Credible Set | purple |
| chr7:104141705 | 7   | 104.1417 | 0.002670671 | Credible Set | purple |
| chr7:104141768 | 7   | 104.1418 | 0.002679300 | Credible Set | purple |
| chr7:104170479 | 7   | 104.1705 | 0.001806270 | Credible Set | purple |
| chr7:104170506 | 7   | 104.1705 | 0.001812380 | Credible Set | purple |
| chr7:104170518 | 7   | 104.1705 | 0.001828490 | Credible Set | purple |
| chr7:104170522 | 7   | 104.1705 | 0.001814914 | Credible Set | purple |
| chr7:104170543 | 7   | 104.1705 | 0.001793815 | Credible Set | purple |
| chr7:104170588 | 7   | 104.1706 | 0.004880965 | Credible Set | purple |
| chr7:104170594 | 7   | 104.1706 | 0.004862902 | Credible Set | purple |
| chr7:104170618 | 7   | 104.1706 | 0.004913876 | Credible Set | purple |
| chr7:104170662 | 7   | 104.1707 | 0.004913876 | Credible Set | purple |
| chr7:104353491 | 7   | 104.3535 | 0.017811187 | Credible Set | purple |
| chr7:104356230 | 7   | 104.3562 | 0.011465954 | Credible Set | purple |
| chr7:104430205 | 7   | 104.4302 | 0.007067539 | Credible Set | purple |
| chr7:104485236 | 7   | 104.4852 | 0.004261719 | Credible Set | purple |
| chr7:104507724 | 7   | 104.5077 | 0.002328720 | Credible Set | purple |
| chr7:104508127 | 7   | 104.5081 | 0.002551765 | Credible Set | purple |
| chr7:104508173 | 7   | 104.5082 | 0.003282108 | Credible Set | purple |
| chr7:104580091 | 7   | 104.5801 | 0.011377779 | Credible Set | purple |
| chr7:105411752 | 7   | 105.4118 | 0.009416495 | Credible Set | purple |

# F34 GBS, retic parameters concentration of hemoglobin in reticulocytes, repeat

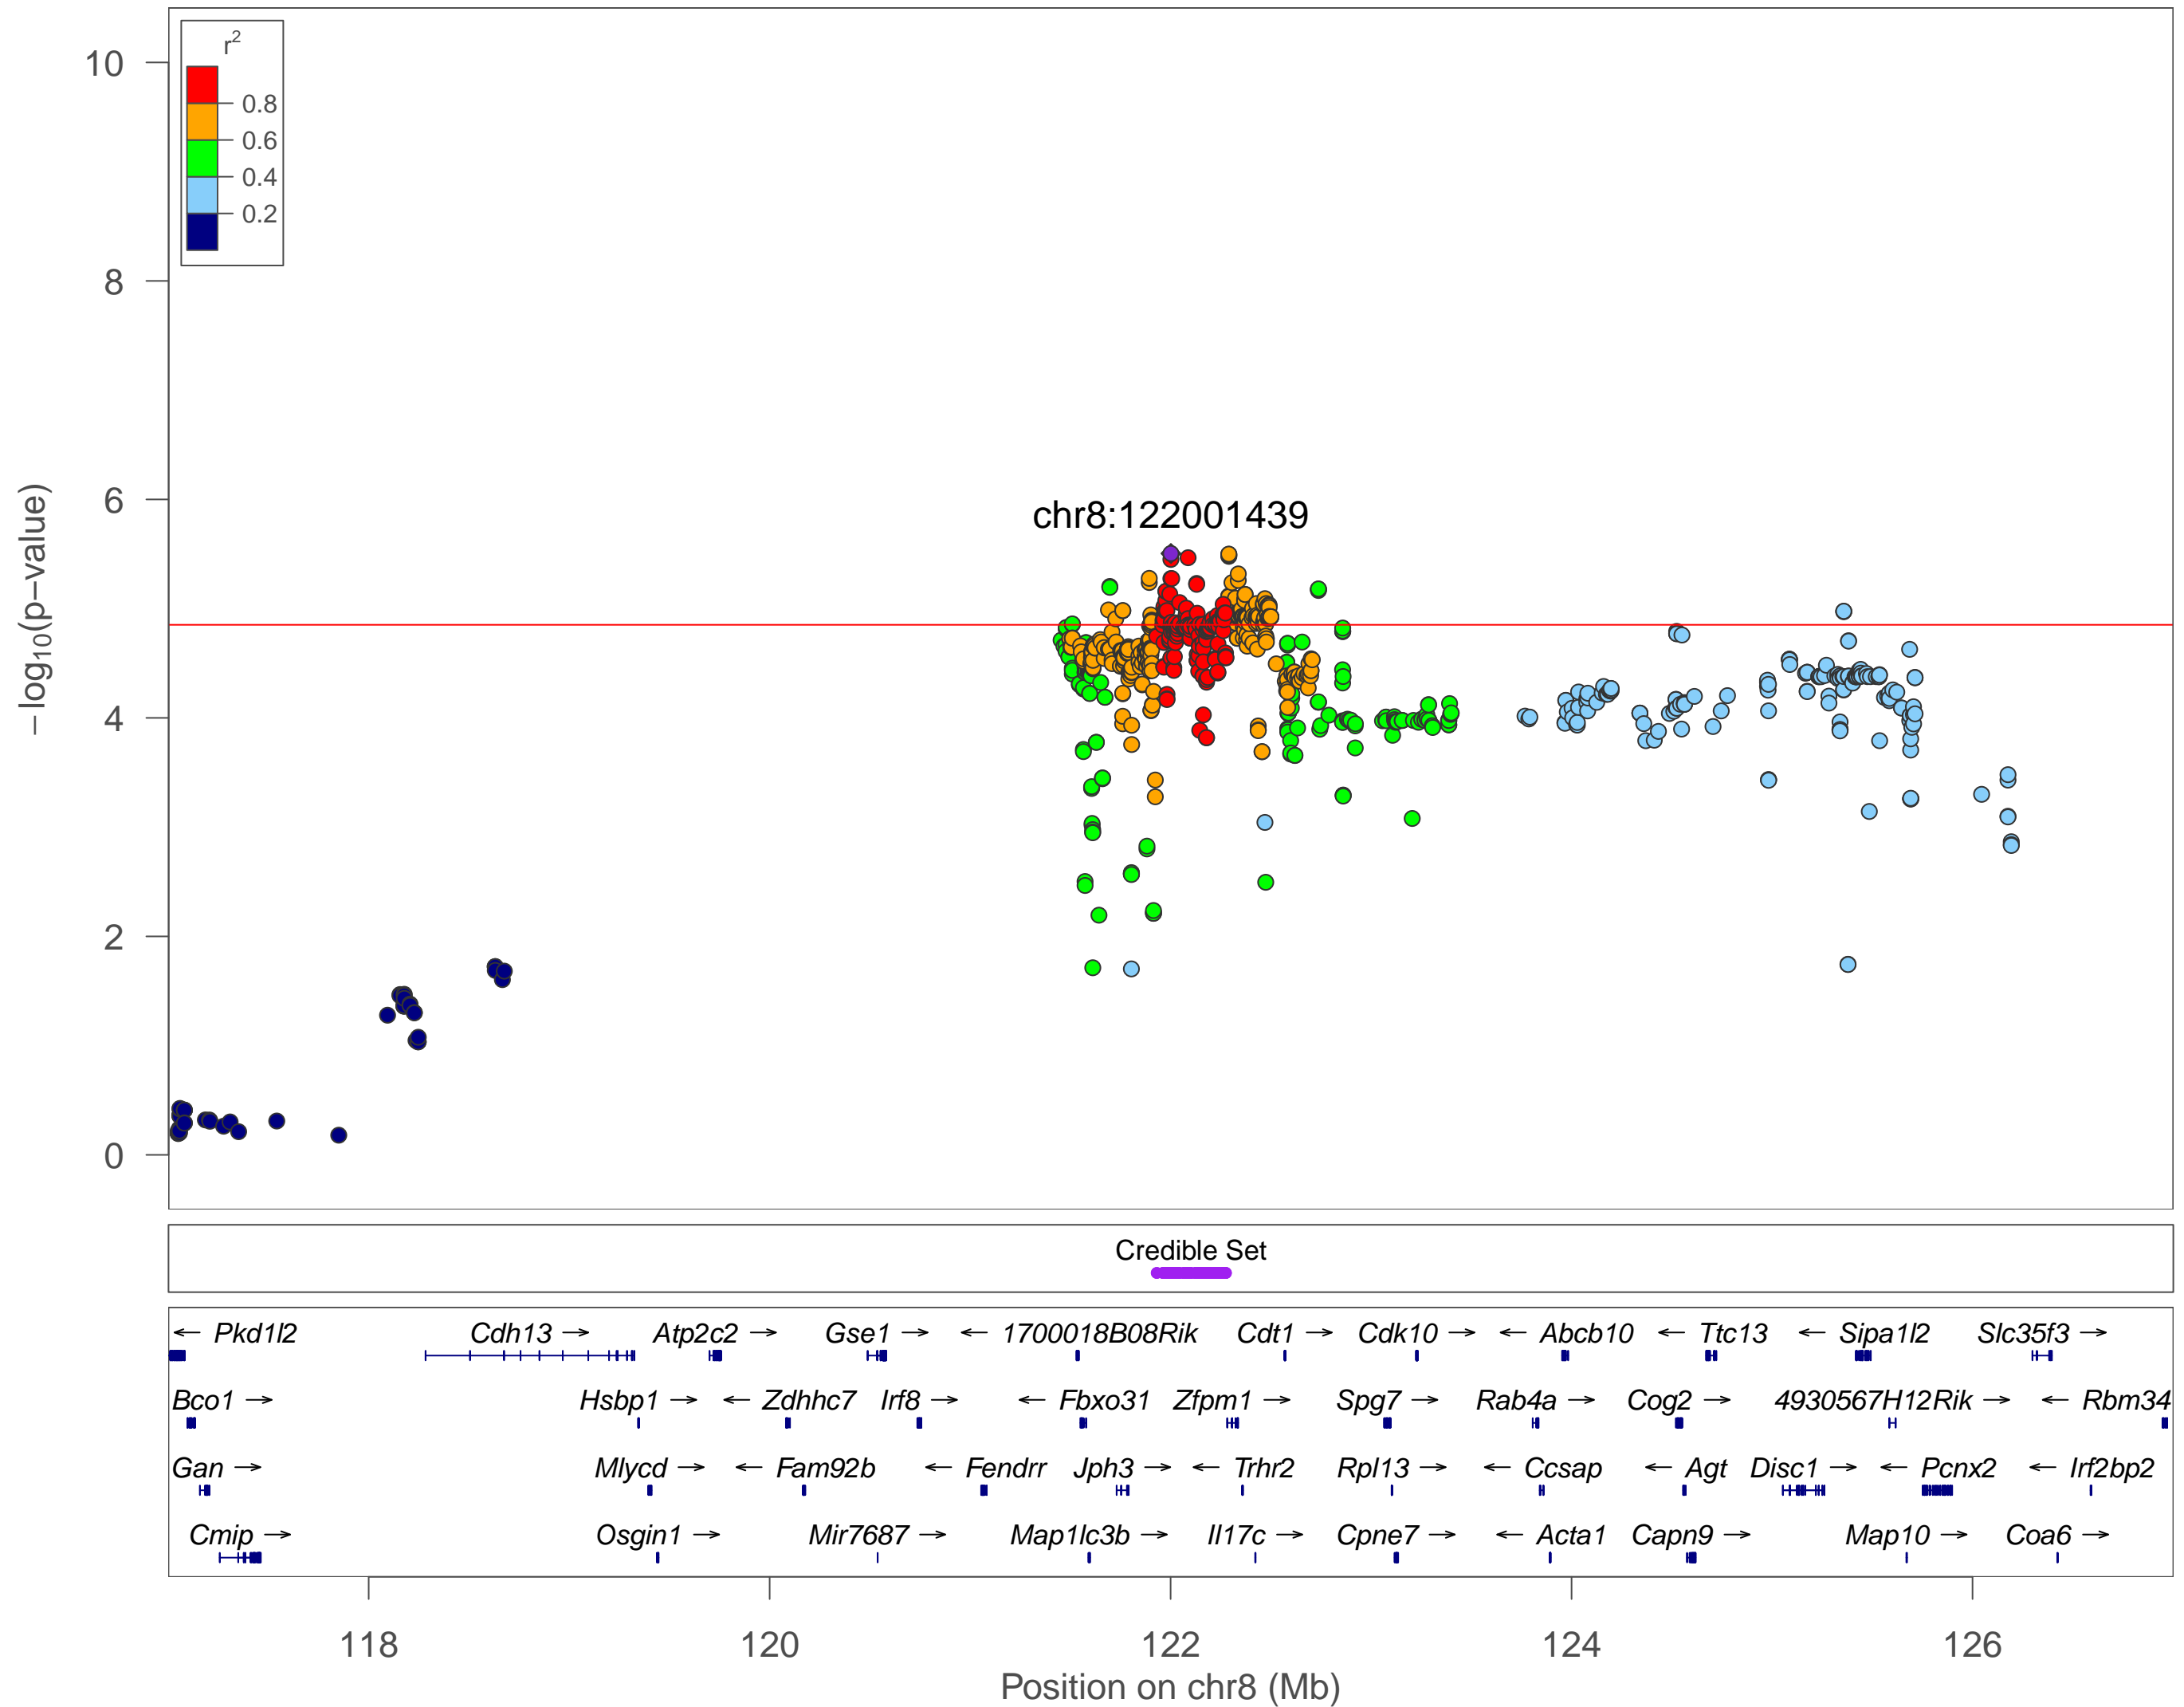

date: Thu Oct 25 17:06:54 2018

build: F34GBS

display range: chr8:117001439–127001439 [117001439–127001439]

hilite range: 0 – 0 [ 0 – 0 ]

reference SNP: chr8:122001439

number of SNPs plotted: 886

min P-value: 3.12E–6 [chr8:122001439]

max P-value: 6.6E–1 [chr8:117850640]

omitted Genes: Mir7077, Mir7078, Plcg2

omitted Genes: Sdr42e1, Gm38416, Hsd17b2

omitted Genes: Mphosph6, Necab2, Slc38a8

omitted Genes: Mbtps1, Hsd11, Dnaaf1

omitted Genes: Taf1c, Adad2, Kcng4

omitted Genes: Wfdc1, Tldc1, Cotl1

omitted Genes: Klhl36, Usp10, Crisp1d2

omitted Genes: 6430548M08Rik, A330074K22Rik, Gins2

omitted Genes: Emc8–1190005i06rik, 1190005i06Rik, Emc8

omitted Genes: Cox4i1, Foxf1, Mthfsd

omitted Genes: Foxc2, Foxl1, 1700030M09Rik

omitted Genes: Zcchc14, Klhdc4, Slc7a5

omitted Genes: BC048644, Car5a, Banp

omitted Genes: Mir7237, Zc3h18, Cyba

omitted Genes: Mvd, 9330133O14Rik, Gm20735

omitted Genes: Snai3, Rnf166, Ctub2

omitted Genes: Piezo1, Appt, Galns

omitted Genes: Trappc2l, Pabpn1l, Mir6396

omitted Genes: Cbfa2t3, Acsf3, Cdh15

omitted Genes: Ankrd11, 2810013P06Rik, Snord68

omitted Genes: Mir7079, Mir7080, Sult5a1

omitted Genes: Dpep1, Chmp1a, Spata33

omitted Genes: Spata2l, 4933417D19Rik, Vps9d1

omitted Genes: Zfp276, Fanca, Spire2

omitted Genes: Tcf25, Mc1r, Tubb3

omitted Genes: Def8, Afg3l1, Dbn1d1

omitted Genes: Gas8, n–R5s100, n–R5s103

omitted Genes: n–R5s104, n–R5s105, n–R5s108

omitted Genes: n–R5s110, n–R5s111, n–R5s113

omitted Genes: Gm25018, n–R5s117, n–R5s121

omitted Genes: n–R5s122, n–R5s123, n–R5s124

omitted Genes: n–R5s128, Gm26391, n–R5s133

Make more plots at <http://csg.sph.umich.edu/locuszoom/>

## Fine-mapping Regions

| snp            | chr | pos (Mb) | pp          | group        | color  |
|----------------|-----|----------|-------------|--------------|--------|
| chr8:121930880 | 8   | 121.9309 | 0.004949384 | Credible Set | purple |
| chr8:121930977 | 8   | 121.9310 | 0.004884971 | Credible Set | purple |
| chr8:121960554 | 8   | 121.9606 | 0.006118467 | Credible Set | purple |
| chr8:121961919 | 8   | 121.9619 | 0.006741756 | Credible Set | purple |
| chr8:121966290 | 8   | 121.9663 | 0.007481209 | Credible Set | purple |
| chr8:121966311 | 8   | 121.9663 | 0.002658600 | Credible Set | purple |
| chr8:121966312 | 8   | 121.9663 | 0.002684870 | Credible Set | purple |
| chr8:121966322 | 8   | 121.9663 | 0.002636304 | Credible Set | purple |
| chr8:121966639 | 8   | 121.9666 | 0.004326518 | Credible Set | purple |
| chr8:121966705 | 8   | 121.9667 | 0.008656549 | Credible Set | purple |
| chr8:121966756 | 8   | 121.9668 | 0.008911267 | Credible Set | purple |
| chr8:121966990 | 8   | 121.9670 | 0.007370962 | Credible Set | purple |
| chr8:121966991 | 8   | 121.9670 | 0.006903072 | Credible Set | purple |
| chr8:121966992 | 8   | 121.9670 | 0.006856297 | Credible Set | purple |
| chr8:121974244 | 8   | 121.9742 | 0.008208380 | Credible Set | purple |
| chr8:121974249 | 8   | 121.9742 | 0.008226306 | Credible Set | purple |
| chr8:121974305 | 8   | 121.9743 | 0.008161931 | Credible Set | purple |
| chr8:121974325 | 8   | 121.9743 | 0.008179746 | Credible Set | purple |
| chr8:121976235 | 8   | 121.9762 | 0.010063614 | Credible Set | purple |
| chr8:121976517 | 8   | 121.9765 | 0.012085593 | Credible Set | purple |
| chr8:121976521 | 8   | 121.9765 | 0.012129693 | Credible Set | purple |
| chr8:121981546 | 8   | 121.9815 | 0.008211202 | Credible Set | purple |
| chr8:121995055 | 8   | 121.9951 | 0.004449220 | Credible Set | purple |
| chr8:121995078 | 8   | 121.9951 | 0.004578666 | Credible Set | purple |
| chr8:121995079 | 8   | 121.9951 | 0.004883014 | Credible Set | purple |
| chr8:121995687 | 8   | 121.9957 | 0.011467249 | Credible Set | purple |
| chr8:122001362 | 8   | 122.0014 | 0.015662249 | Credible Set | purple |
| chr8:122001439 | 8   | 122.0014 | 0.025989359 | Credible Set | purple |
| chr8:122001442 | 8   | 122.0014 | 0.023059665 | Credible Set | purple |
| chr8:122001818 | 8   | 122.0018 | 0.005741075 | Credible Set | purple |
| chr8:122001981 | 8   | 122.0020 | 0.006054676 | Credible Set | purple |
| chr8:122002025 | 8   | 122.0020 | 0.003179842 | Credible Set | purple |
| chr8:122002067 | 8   | 122.0021 | 0.003179842 | Credible Set | purple |
| chr8:122002101 | 8   | 122.0021 | 0.003179842 | Credible Set | purple |
| chr8:122002127 | 8   | 122.0021 | 0.006030626 | Credible Set | purple |
| chr8:122002218 | 8   | 122.0022 | 0.006030626 | Credible Set | purple |

## Fine-mapping Regions

| snp            | chr | pos (Mb) | pp          | group        | color  |
|----------------|-----|----------|-------------|--------------|--------|
| chr8:122003523 | 8   | 122.0035 | 0.006279445 | Credible Set | purple |
| chr8:122003541 | 8   | 122.0035 | 0.006449517 | Credible Set | purple |
| chr8:122003853 | 8   | 122.0039 | 0.005918232 | Credible Set | purple |
| chr8:122003945 | 8   | 122.0039 | 0.006484190 | Credible Set | purple |
| chr8:122005311 | 8   | 122.0053 | 0.005339823 | Credible Set | purple |
| chr8:122005336 | 8   | 122.0053 | 0.005339823 | Credible Set | purple |
| chr8:122005348 | 8   | 122.0053 | 0.015674070 | Credible Set | purple |
| chr8:122010526 | 8   | 122.0105 | 0.006030626 | Credible Set | purple |
| chr8:122015785 | 8   | 122.0158 | 0.005369289 | Credible Set | purple |
| chr8:122015943 | 8   | 122.0159 | 0.002622184 | Credible Set | purple |
| chr8:122015966 | 8   | 122.0160 | 0.002472665 | Credible Set | purple |
| chr8:122018214 | 8   | 122.0182 | 0.005907470 | Credible Set | purple |
| chr8:122018241 | 8   | 122.0182 | 0.005545572 | Credible Set | purple |
| chr8:122018758 | 8   | 122.0188 | 0.003254292 | Credible Set | purple |
| chr8:122020302 | 8   | 122.0203 | 0.005191434 | Credible Set | purple |
| chr8:122023460 | 8   | 122.0235 | 0.006425334 | Credible Set | purple |
| chr8:122024035 | 8   | 122.0240 | 0.004310108 | Credible Set | purple |
| chr8:122026904 | 8   | 122.0269 | 0.005462509 | Credible Set | purple |
| chr8:122031170 | 8   | 122.0312 | 0.004907366 | Credible Set | purple |
| chr8:122032377 | 8   | 122.0324 | 0.005793253 | Credible Set | purple |
| chr8:122032681 | 8   | 122.0327 | 0.005848699 | Credible Set | purple |
| chr8:122035610 | 8   | 122.0356 | 0.005222523 | Credible Set | purple |
| chr8:122035650 | 8   | 122.0357 | 0.005191240 | Credible Set | purple |
| chr8:122035881 | 8   | 122.0359 | 0.005787015 | Credible Set | purple |
| chr8:122036007 | 8   | 122.0360 | 0.005672751 | Credible Set | purple |
| chr8:122036452 | 8   | 122.0365 | 0.006023736 | Credible Set | purple |
| chr8:122045025 | 8   | 122.0450 | 0.009645882 | Credible Set | purple |
| chr8:122045040 | 8   | 122.0450 | 0.006332939 | Credible Set | purple |
| chr8:122065233 | 8   | 122.0652 | 0.005731392 | Credible Set | purple |
| chr8:122065534 | 8   | 122.0655 | 0.005767254 | Credible Set | purple |
| chr8:122065719 | 8   | 122.0657 | 0.005978678 | Credible Set | purple |
| chr8:122074319 | 8   | 122.0743 | 0.005785234 | Credible Set | purple |
| chr8:122074380 | 8   | 122.0744 | 0.005804973 | Credible Set | purple |
| chr8:122074409 | 8   | 122.0744 | 0.005804973 | Credible Set | purple |
| chr8:122075721 | 8   | 122.0757 | 0.007299219 | Credible Set | purple |
| chr8:122077089 | 8   | 122.0771 | 0.005975461 | Credible Set | purple |

## Fine-mapping Regions

| snp            | chr | pos (Mb) | pp          | group        | color  |
|----------------|-----|----------|-------------|--------------|--------|
| chr8:122077746 | 8   | 122.0777 | 0.005863109 | Credible Set | purple |
| chr8:122078705 | 8   | 122.0787 | 0.007793853 | Credible Set | purple |
| chr8:122078711 | 8   | 122.0787 | 0.008626213 | Credible Set | purple |
| chr8:122087021 | 8   | 122.0870 | 0.006740003 | Credible Set | purple |
| chr8:122087024 | 8   | 122.0870 | 0.006992745 | Credible Set | purple |
| chr8:122087068 | 8   | 122.0871 | 0.023857465 | Credible Set | purple |
| chr8:122087488 | 8   | 122.0875 | 0.006142591 | Credible Set | purple |
| chr8:122097829 | 8   | 122.0978 | 0.004729330 | Credible Set | purple |
| chr8:122097864 | 8   | 122.0979 | 0.004718729 | Credible Set | purple |
| chr8:122097914 | 8   | 122.0979 | 0.004718729 | Credible Set | purple |
| chr8:122098026 | 8   | 122.0980 | 0.005968375 | Credible Set | purple |
| chr8:122098264 | 8   | 122.0983 | 0.006030626 | Credible Set | purple |
| chr8:122098555 | 8   | 122.0986 | 0.006134521 | Credible Set | purple |
| chr8:122099136 | 8   | 122.0991 | 0.005595918 | Credible Set | purple |
| chr8:122099269 | 8   | 122.0993 | 0.006116376 | Credible Set | purple |
| chr8:122099407 | 8   | 122.0994 | 0.005954153 | Credible Set | purple |
| chr8:122119850 | 8   | 122.1198 | 0.006174390 | Credible Set | purple |
| chr8:122126372 | 8   | 122.1264 | 0.005781633 | Credible Set | purple |
| chr8:122126643 | 8   | 122.1266 | 0.005675720 | Credible Set | purple |
| chr8:122126657 | 8   | 122.1267 | 0.005643272 | Credible Set | purple |
| chr8:122126675 | 8   | 122.1267 | 0.005655547 | Credible Set | purple |
| chr8:122129779 | 8   | 122.1298 | 0.014201591 | Credible Set | purple |
| chr8:122129781 | 8   | 122.1298 | 0.013935105 | Credible Set | purple |
| chr8:122132490 | 8   | 122.1325 | 0.007783198 | Credible Set | purple |
| chr8:122132563 | 8   | 122.1326 | 0.003411458 | Credible Set | purple |
| chr8:122132629 | 8   | 122.1326 | 0.003026721 | Credible Set | purple |
| chr8:122132657 | 8   | 122.1327 | 0.003039609 | Credible Set | purple |
| chr8:122132660 | 8   | 122.1327 | 0.002988825 | Credible Set | purple |
| chr8:122132700 | 8   | 122.1327 | 0.002998279 | Credible Set | purple |
| chr8:122140064 | 8   | 122.1401 | 0.002430579 | Credible Set | purple |
| chr8:122140617 | 8   | 122.1406 | 0.004967122 | Credible Set | purple |
| chr8:122140668 | 8   | 122.1407 | 0.003327326 | Credible Set | purple |
| chr8:122143194 | 8   | 122.1432 | 0.004096054 | Credible Set | purple |
| chr8:122143198 | 8   | 122.1432 | 0.003989126 | Credible Set | purple |
| chr8:122143647 | 8   | 122.1436 | 0.006227860 | Credible Set | purple |
| chr8:122161138 | 8   | 122.1611 | 0.004311153 | Credible Set | purple |

## Fine-mapping Regions

| snp            | chr | pos (Mb) | pp          | group        | color  |
|----------------|-----|----------|-------------|--------------|--------|
| chr8:122161157 | 8   | 122.1612 | 0.005598723 | Credible Set | purple |
| chr8:122161598 | 8   | 122.1616 | 0.002221463 | Credible Set | purple |
| chr8:122161622 | 8   | 122.1616 | 0.002230187 | Credible Set | purple |
| chr8:122161625 | 8   | 122.1616 | 0.002206512 | Credible Set | purple |
| chr8:122161665 | 8   | 122.1617 | 0.006208114 | Credible Set | purple |
| chr8:122161683 | 8   | 122.1617 | 0.006208114 | Credible Set | purple |
| chr8:122161737 | 8   | 122.1617 | 0.006208114 | Credible Set | purple |
| chr8:122163079 | 8   | 122.1631 | 0.003866526 | Credible Set | purple |
| chr8:122163130 | 8   | 122.1631 | 0.002933719 | Credible Set | purple |
| chr8:122178957 | 8   | 122.1790 | 0.004595634 | Credible Set | purple |
| chr8:122179254 | 8   | 122.1793 | 0.002057829 | Credible Set | purple |
| chr8:122179449 | 8   | 122.1794 | 0.005394876 | Credible Set | purple |
| chr8:122179473 | 8   | 122.1795 | 0.005412446 | Credible Set | purple |
| chr8:122185374 | 8   | 122.1854 | 0.002147277 | Credible Set | purple |
| chr8:122185458 | 8   | 122.1855 | 0.005866642 | Credible Set | purple |
| chr8:122186770 | 8   | 122.1868 | 0.005470198 | Credible Set | purple |
| chr8:122186780 | 8   | 122.1868 | 0.005649025 | Credible Set | purple |
| chr8:122192954 | 8   | 122.1930 | 0.005758913 | Credible Set | purple |
| chr8:122193526 | 8   | 122.1935 | 0.005802336 | Credible Set | purple |
| chr8:122193537 | 8   | 122.1935 | 0.005826553 | Credible Set | purple |
| chr8:122197166 | 8   | 122.1972 | 0.005812274 | Credible Set | purple |
| chr8:122197187 | 8   | 122.1972 | 0.006483091 | Credible Set | purple |
| chr8:122210438 | 8   | 122.2104 | 0.006972384 | Credible Set | purple |
| chr8:122211178 | 8   | 122.2112 | 0.006122677 | Credible Set | purple |
| chr8:122222775 | 8   | 122.2228 | 0.006030626 | Credible Set | purple |
| chr8:122223010 | 8   | 122.2230 | 0.003135265 | Credible Set | purple |
| chr8:122223079 | 8   | 122.2231 | 0.003072647 | Credible Set | purple |
| chr8:122224941 | 8   | 122.2249 | 0.006214862 | Credible Set | purple |
| chr8:122233190 | 8   | 122.2332 | 0.007433642 | Credible Set | purple |
| chr8:122235012 | 8   | 122.2350 | 0.006592882 | Credible Set | purple |
| chr8:122235350 | 8   | 122.2353 | 0.002366069 | Credible Set | purple |
| chr8:122235368 | 8   | 122.2354 | 0.002348658 | Credible Set | purple |
| chr8:122235394 | 8   | 122.2354 | 0.002400298 | Credible Set | purple |
| chr8:122236097 | 8   | 122.2361 | 0.004212245 | Credible Set | purple |
| chr8:122237812 | 8   | 122.2378 | 0.006386226 | Credible Set | purple |
| chr8:122237817 | 8   | 122.2378 | 0.006368699 | Credible Set | purple |



# Fine-mapping Regions

| snp            | chr | pos (Mb) | pp          | group        | color  |
|----------------|-----|----------|-------------|--------------|--------|
| chr8:122240202 | 8   | 122.2402 | 0.006331737 | Credible Set | purple |
| chr8:122240296 | 8   | 122.2403 | 0.005980477 | Credible Set | purple |
| chr8:122246861 | 8   | 122.2469 | 0.006659267 | Credible Set | purple |
| chr8:122259808 | 8   | 122.2598 | 0.007559009 | Credible Set | purple |
| chr8:122262163 | 8   | 122.2622 | 0.009314276 | Credible Set | purple |
| chr8:122262214 | 8   | 122.2622 | 0.007610542 | Credible Set | purple |
| chr8:122262948 | 8   | 122.2629 | 0.005477178 | Credible Set | purple |
| chr8:122265327 | 8   | 122.2653 | 0.007413144 | Credible Set | purple |
| chr8:122265814 | 8   | 122.2658 | 0.006834875 | Credible Set | purple |
| chr8:122265865 | 8   | 122.2659 | 0.006839467 | Credible Set | purple |
| chr8:122271333 | 8   | 122.2713 | 0.007855758 | Credible Set | purple |
| chr8:122273143 | 8   | 122.2731 | 0.007807822 | Credible Set | purple |
| chr8:122273765 | 8   | 122.2738 | 0.003506738 | Credible Set | purple |
| chr8:122274216 | 8   | 122.2742 | 0.003266308 | Credible Set | purple |
| chr8:122275678 | 8   | 122.2757 | 0.003175994 | Credible Set | purple |
| chr8:122275695 | 8   | 122.2757 | 0.003198128 | Credible Set | purple |

# F34 GBS, retic parameters concentration of hemoglobin in reticulocytes, repeat

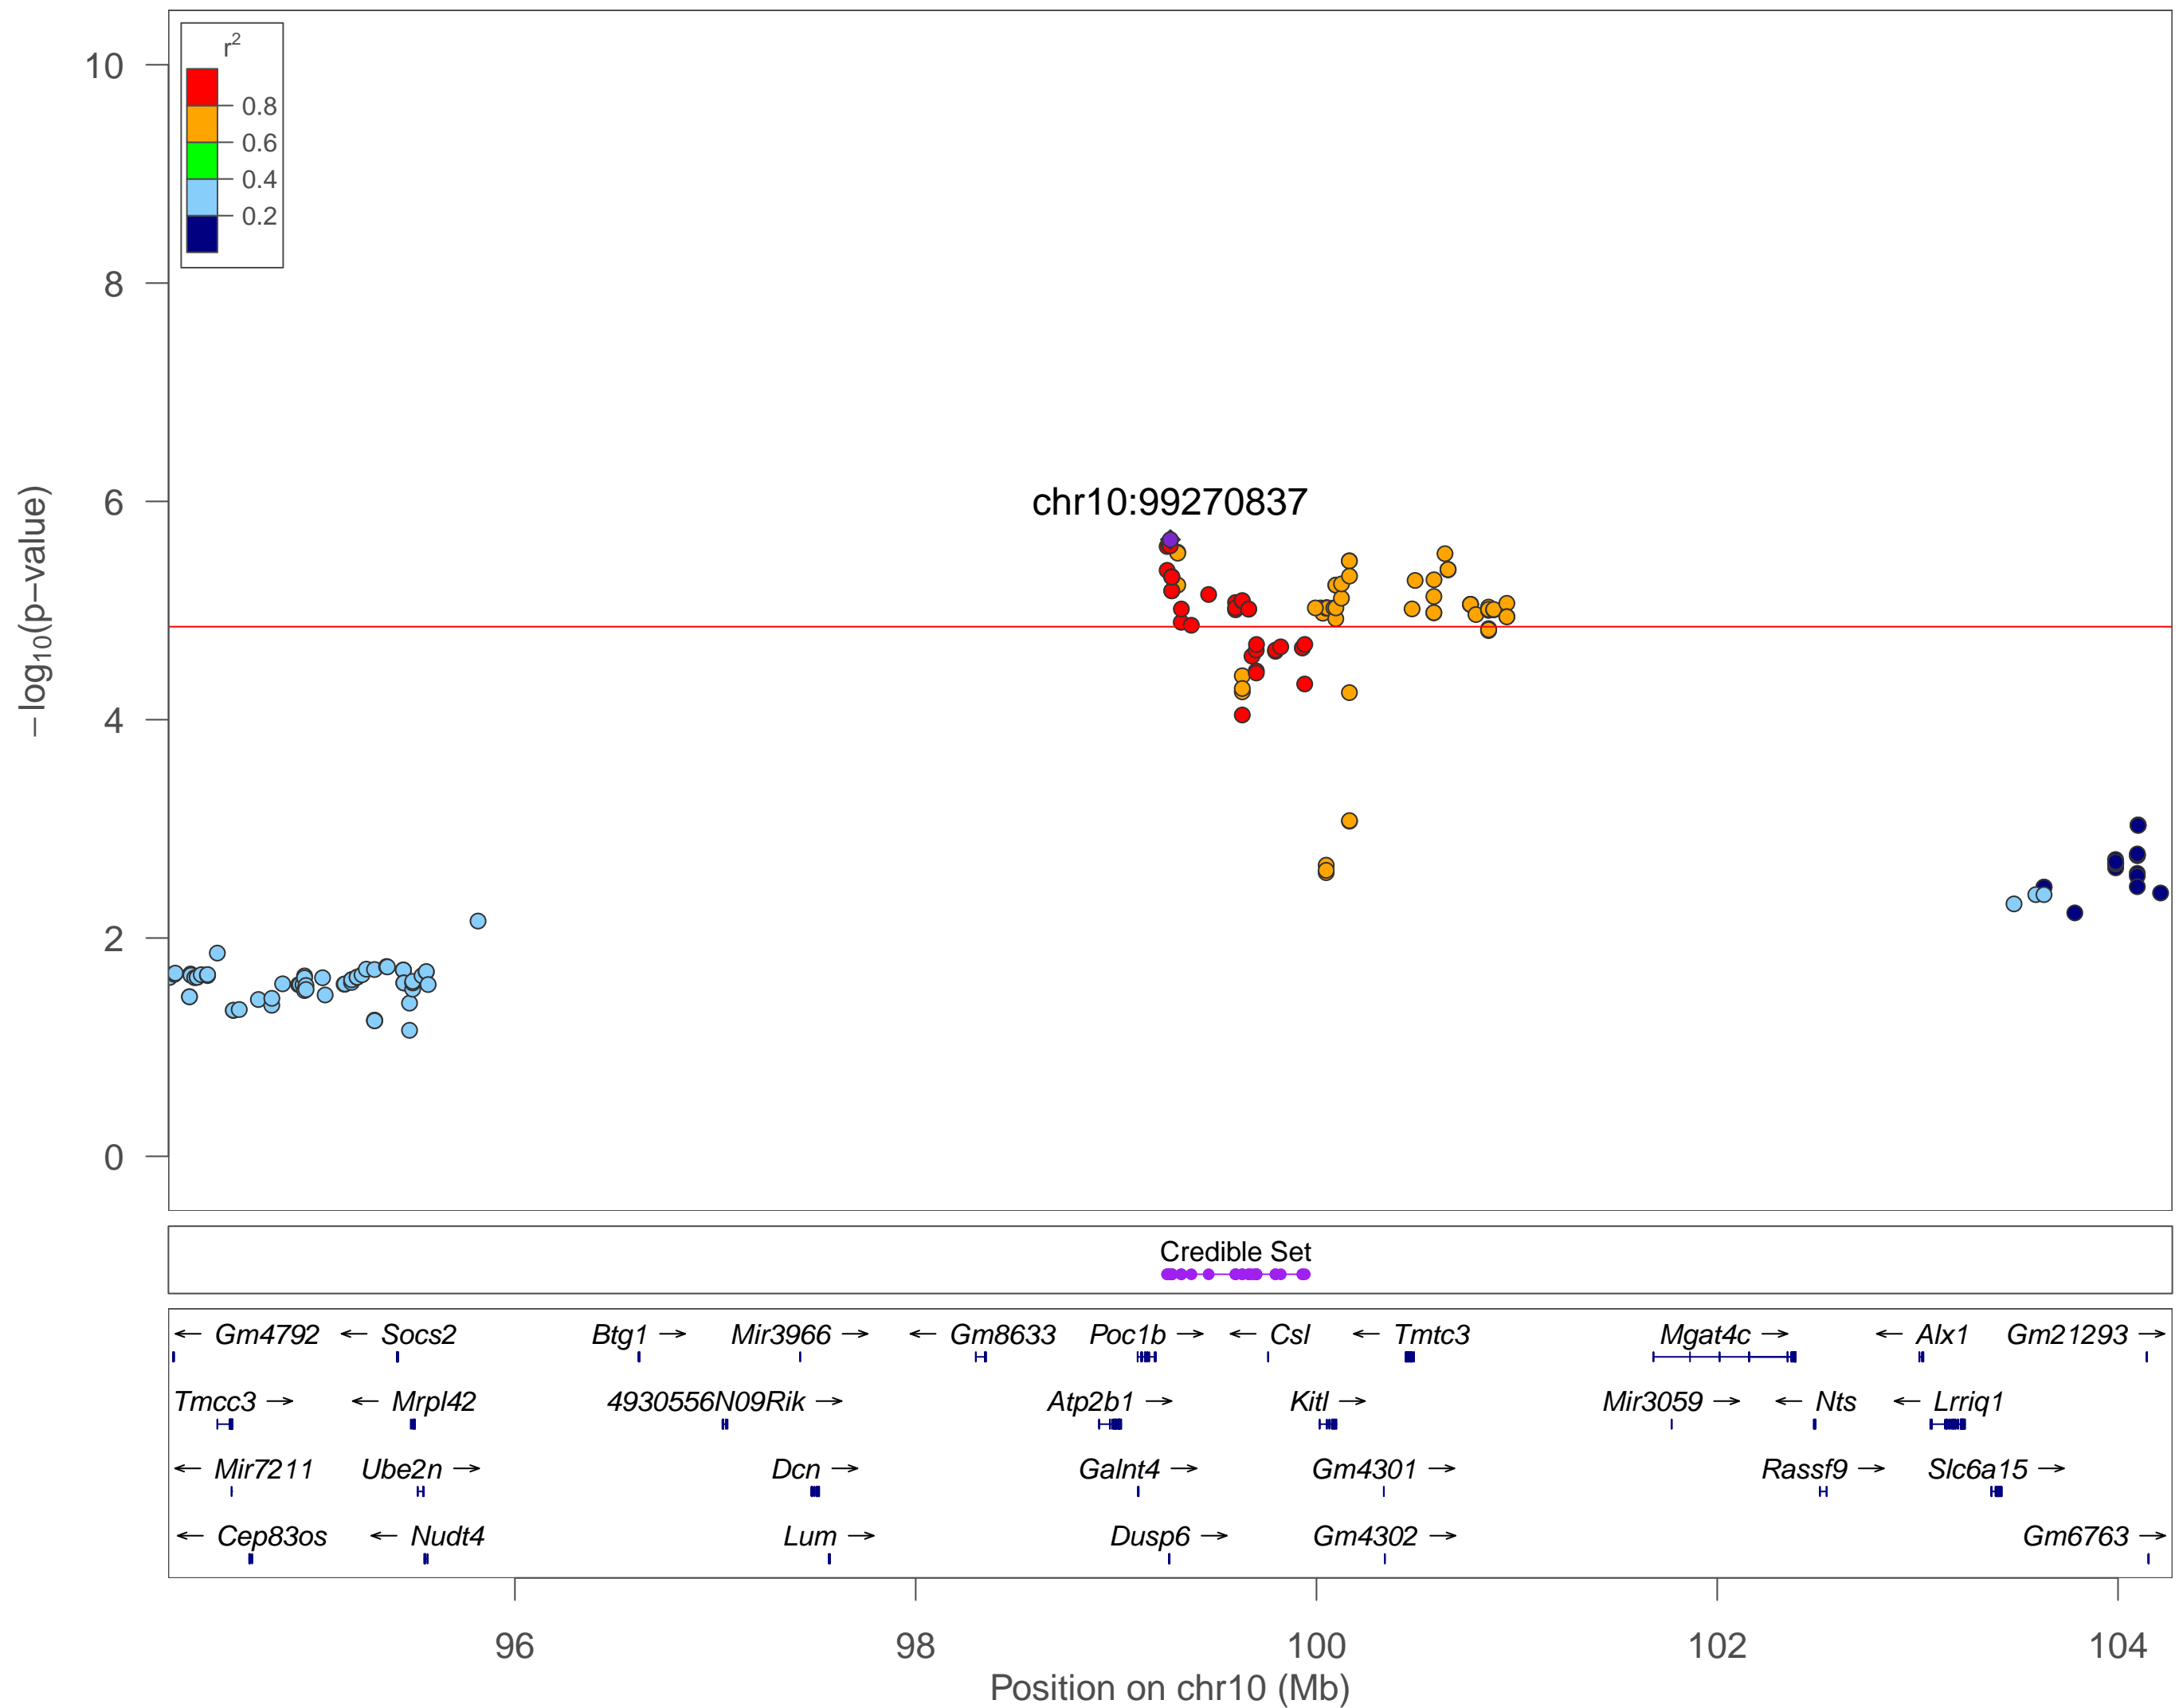

date: Thu Oct 25 17:06:08 2018

build: F34GBS

display range: chr10:94270837–104270837 [94270837–104270837]

hilite range: 0 – 0 [ 0 – 0 ]

reference SNP: chr10:99270837

number of SNPs plotted: 184

min P-value: 2.24E–6 [chr10:99270837]

max P-value: 7E–2 [chr10:95474045]

omitted Genes: Cep83, Plxnc1, Gm29684

omitted Genes: Cradd, 2310039L15Rik, 5730420D15Rik

omitted Genes: Mir3058, Eea1, 4930459C07Rik

omitted Genes: 4930473O22Rik, Kera, Epyc

omitted Genes: Gm10754, Ccer1, 4930525C09Rik

omitted Genes: Gm20110, Gm18409, Gm4303

omitted Genes: Gm4305, Gm4307, Gm4312

omitted Genes: Cep290, 4930430F08Rik, 1700017N19Rik

omitted Genes: Gm8764, Gm21304, Gm21312

omitted Genes: Gm20765, Gm4340

## Fine-mapping Regions

| snp            | chr | pos (Mb) | pp          | group        | color  |
|----------------|-----|----------|-------------|--------------|--------|
| chr10:99254791 | 10  | 99.25479 | 0.065606388 | Credible Set | purple |
| chr10:99254830 | 10  | 99.25483 | 0.049790182 | Credible Set | purple |
| chr10:99263835 | 10  | 99.26384 | 0.096825995 | Credible Set | purple |
| chr10:99263868 | 10  | 99.26387 | 0.096825995 | Credible Set | purple |
| chr10:99270417 | 10  | 99.27042 | 0.065606388 | Credible Set | purple |
| chr10:99270837 | 10  | 99.27084 | 0.096825995 | Credible Set | purple |
| chr10:99277813 | 10  | 99.27781 | 0.029137103 | Credible Set | purple |
| chr10:99277816 | 10  | 99.27782 | 0.029137103 | Credible Set | purple |
| chr10:99277972 | 10  | 99.27797 | 0.040206862 | Credible Set | purple |
| chr10:99277973 | 10  | 99.27797 | 0.040206862 | Credible Set | purple |
| chr10:99278026 | 10  | 99.27803 | 0.040206862 | Credible Set | purple |
| chr10:99325139 | 10  | 99.32514 | 0.016129540 | Credible Set | purple |
| chr10:99325722 | 10  | 99.32572 | 0.020720109 | Credible Set | purple |
| chr10:99375519 | 10  | 99.37552 | 0.015028662 | Credible Set | purple |
| chr10:99461777 | 10  | 99.46178 | 0.029137103 | Credible Set | purple |
| chr10:99596119 | 10  | 99.59612 | 0.020720109 | Credible Set | purple |
| chr10:99596142 | 10  | 99.59614 | 0.025644468 | Credible Set | purple |
| chr10:99596164 | 10  | 99.59616 | 0.022914216 | Credible Set | purple |
| chr10:99629121 | 10  | 99.62912 | 0.025644468 | Credible Set | purple |
| chr10:99629701 | 10  | 99.62970 | 0.025644468 | Credible Set | purple |
| chr10:99661770 | 10  | 99.66177 | 0.020720109 | Credible Set | purple |
| chr10:99661829 | 10  | 99.66183 | 0.020720109 | Credible Set | purple |
| chr10:99678204 | 10  | 99.67820 | 0.008334112 | Credible Set | purple |
| chr10:99699271 | 10  | 99.69927 | 0.009365149 | Credible Set | purple |
| chr10:99699649 | 10  | 99.69965 | 0.006117200 | Credible Set | purple |
| chr10:99699681 | 10  | 99.69968 | 0.005960117 | Credible Set | purple |
| chr10:99700646 | 10  | 99.70065 | 0.010697830 | Credible Set | purple |
| chr10:99795502 | 10  | 99.79550 | 0.008993465 | Credible Set | purple |
| chr10:99795653 | 10  | 99.79565 | 0.009365149 | Credible Set | purple |
| chr10:99821621 | 10  | 99.82162 | 0.010212225 | Credible Set | purple |
| chr10:99929872 | 10  | 99.92987 | 0.009769853 | Credible Set | purple |
| chr10:99930010 | 10  | 99.93001 | 0.009769853 | Credible Set | purple |
| chr10:99941475 | 10  | 99.94147 | 0.010697830 | Credible Set | purple |

# F34 GBS, retic parameters concentration of hemoglobin in reticulocytes, repeat

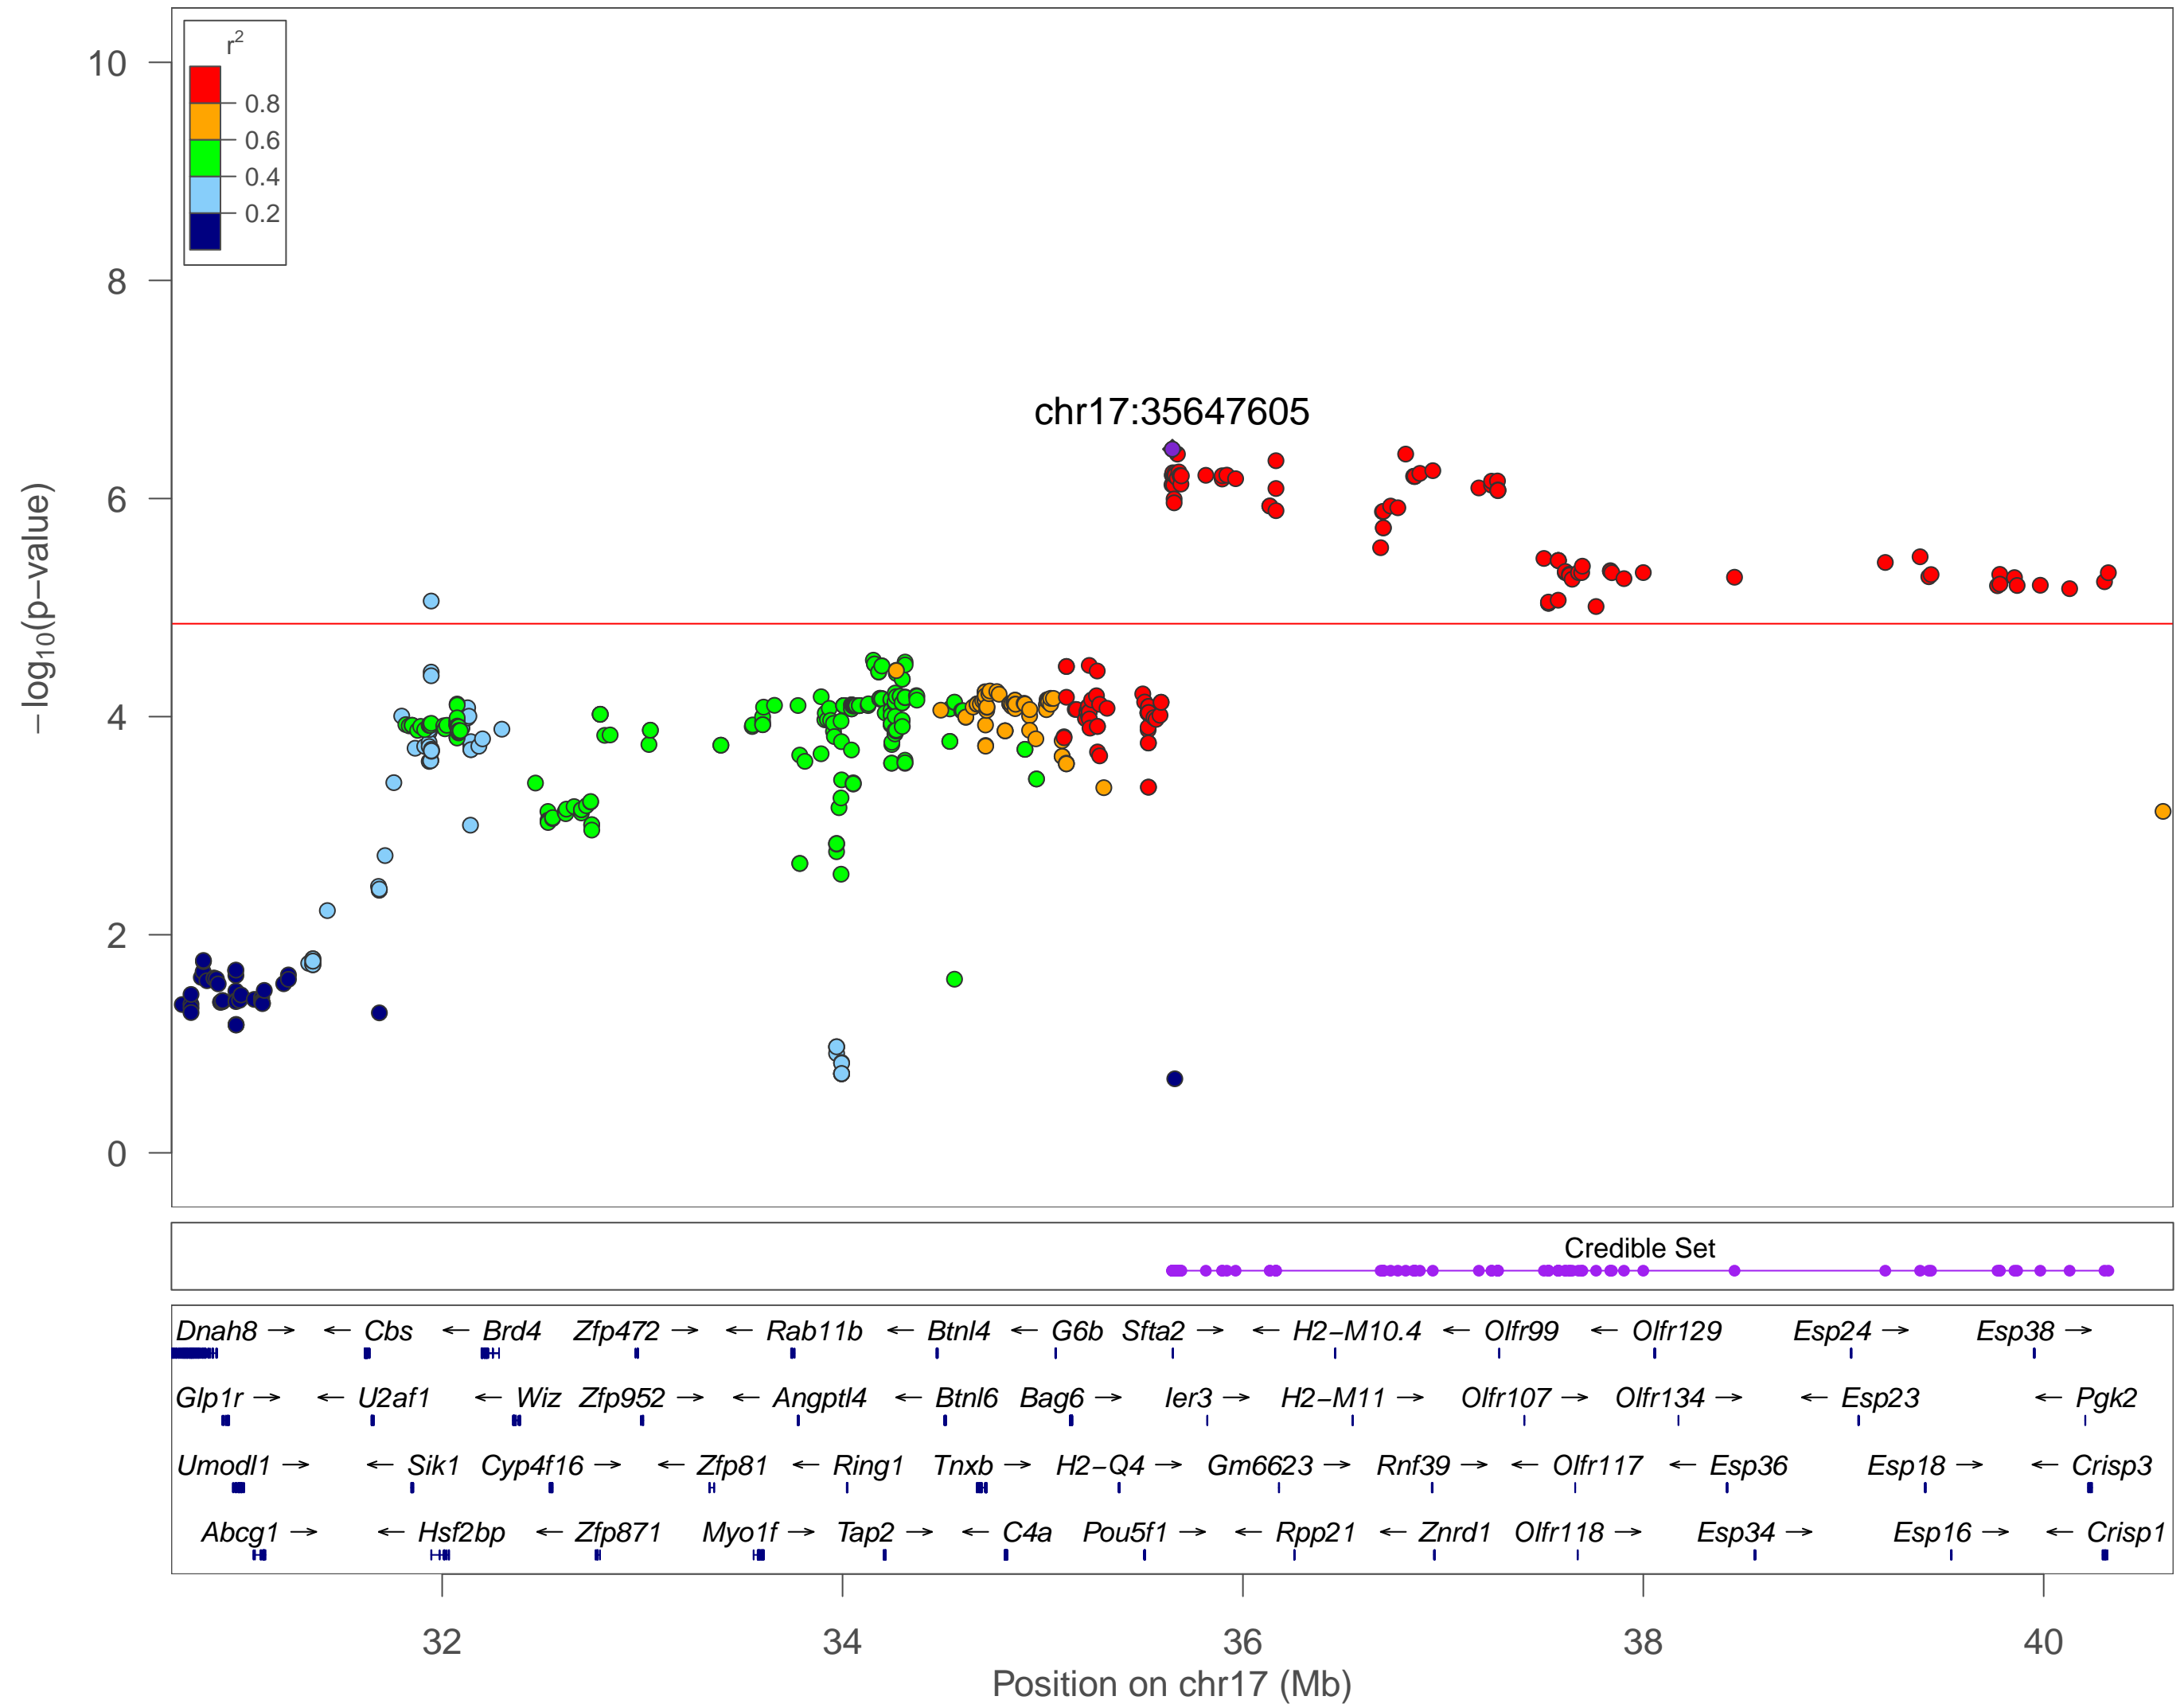

date: Thu Oct 25 17:06:23 2018

build: F34GBS

display range: chr17:30647605–40647605 [30647605–40647605]

hilite range: 0 – 0 [ 0 – 0 ]

reference SNP: chr17:35647605

number of SNPs plotted: 518

min P-value: 3.52E–7 [chr17:35647605]

max P-value: 2.09E–1 [chr17:35659711]

omitted Genes: Tff3, Tff2, LOC102631757

omitted Genes: Tff1, Tmprss3, Ubash3a

omitted Genes: Rsph1, Slc37a1, Pde9a

omitted Genes: Wdr4, Ndufv3, Pknox1

omitted Genes: Cryaa, Rrp1b, Pdxk-ps

omitted Genes: Notch3, Ephx3, Gm4432

omitted Genes: Akap8, Akap8l, Rasal3

omitted Genes: A530088E08Rik, Pglyrp2, Cyp4f39

omitted Genes: Cyp4f17, Cyp4f37, Cyp4f40

omitted Genes: Cyp4f15, Zfp811, Zfp799

omitted Genes: Zfp870, Cyp4f14, Cyp4f13

omitted Genes: Cyp4f41-ps, Zfp763, 4921501E09Rik

omitted Genes: Zfp563, Morc2b, Olfr55

omitted Genes: Olfr239, Gm4461, Zfp955a

omitted Genes: Olfr63, Zfp955b, Zfp101

omitted Genes: Actl9, Adamts10, Zfp414

omitted Genes: Pram1, Hnrnpm, March2

omitted Genes: Kank3, Rps28, Ndufa7

omitted Genes: Cd320, Kifc1, Gm27740

omitted Genes: Platr17, BC051226, Daxx

omitted Genes: Zbtb22, Tapbp, Rgl2

omitted Genes: Pfdn6, Wdr46, B3galt4

omitted Genes: Rps18, Vps52, H2-K2

omitted Genes: AA388235, H2-K1, Mir219a-1

omitted Genes: Mir219c, H2-Ke6, Slc39a7

omitted Genes: Rxrb, Col11a2, BC051537

omitted Genes: H2-Oa, Brd2, H2-DMa

omitted Genes: H2-DMb2, H2-DMb1, Psmb9

omitted Genes: Tap1, Psmb8, H2-Ob

omitted Genes: H2-Ab1, H2-Aa, H2-Eb1

omitted Genes: H2-Eb2, Btln2, Btln1, Btln4

omitted Genes: BC051143, Btln5, ps, Notch4

Make more plots at <http://csg.sph.umich.edu/locuszoom/>

## Fine-mapping Regions

| snp            | chr | pos (Mb) | pp          | group        | color  |
|----------------|-----|----------|-------------|--------------|--------|
| chr17:35645542 | 17  | 35.64554 | 0.015959227 | Credible Set | purple |
| chr17:35647446 | 17  | 35.64745 | 0.019403871 | Credible Set | purple |
| chr17:35647569 | 17  | 35.64757 | 0.019403871 | Credible Set | purple |
| chr17:35647605 | 17  | 35.64760 | 0.032938940 | Credible Set | purple |
| chr17:35647647 | 17  | 35.64765 | 0.032864243 | Credible Set | purple |
| chr17:35649675 | 17  | 35.64968 | 0.020347768 | Credible Set | purple |
| chr17:35653842 | 17  | 35.65384 | 0.015835848 | Credible Set | purple |
| chr17:35656227 | 17  | 35.65623 | 0.011953328 | Credible Set | purple |
| chr17:35656237 | 17  | 35.65624 | 0.011049252 | Credible Set | purple |
| chr17:35657043 | 17  | 35.65704 | 0.019403871 | Credible Set | purple |
| chr17:35659591 | 17  | 35.65959 | 0.019403871 | Credible Set | purple |
| chr17:35659790 | 17  | 35.65979 | 0.019285867 | Credible Set | purple |
| chr17:35661925 | 17  | 35.66192 | 0.020261720 | Credible Set | purple |
| chr17:35661953 | 17  | 35.66195 | 0.020235492 | Credible Set | purple |
| chr17:35662044 | 17  | 35.66204 | 0.019403871 | Credible Set | purple |
| chr17:35671886 | 17  | 35.67189 | 0.018244197 | Credible Set | purple |
| chr17:35672608 | 17  | 35.67261 | 0.029769228 | Credible Set | purple |
| chr17:35680171 | 17  | 35.68017 | 0.020699720 | Credible Set | purple |
| chr17:35685462 | 17  | 35.68546 | 0.019287142 | Credible Set | purple |
| chr17:35690117 | 17  | 35.69012 | 0.016166071 | Credible Set | purple |
| chr17:35692366 | 17  | 35.69237 | 0.019114064 | Credible Set | purple |
| chr17:35814797 | 17  | 35.81480 | 0.019338733 | Credible Set | purple |
| chr17:35896309 | 17  | 35.89631 | 0.017933541 | Credible Set | purple |
| chr17:35896336 | 17  | 35.89634 | 0.019157881 | Credible Set | purple |
| chr17:35919532 | 17  | 35.91953 | 0.019403871 | Credible Set | purple |
| chr17:35963419 | 17  | 35.96342 | 0.018046527 | Credible Set | purple |
| chr17:36134373 | 17  | 36.13437 | 0.010351821 | Credible Set | purple |
| chr17:36134388 | 17  | 36.13439 | 0.010351821 | Credible Set | purple |
| chr17:36164938 | 17  | 36.16494 | 0.026020321 | Credible Set | purple |
| chr17:36164968 | 17  | 36.16497 | 0.014785564 | Credible Set | purple |
| chr17:36165054 | 17  | 36.16505 | 0.009423360 | Credible Set | purple |
| chr17:36687888 | 17  | 36.68789 | 0.004445141 | Credible Set | purple |
| chr17:36696968 | 17  | 36.69697 | 0.009233952 | Credible Set | purple |
| chr17:36701296 | 17  | 36.70130 | 0.006640878 | Credible Set | purple |
| chr17:36701348 | 17  | 36.70135 | 0.006652416 | Credible Set | purple |
| chr17:36701690 | 17  | 36.70169 | 0.009295105 | Credible Set | purple |

## Fine-mapping Regions

| snp            | chr | pos (Mb) | pp          | group        | color  |
|----------------|-----|----------|-------------|--------------|--------|
| chr17:36737772 | 17  | 36.73777 | 0.010347145 | Credible Set | purple |
| chr17:36773709 | 17  | 36.77371 | 0.009993692 | Credible Set | purple |
| chr17:36813020 | 17  | 36.81302 | 0.029796440 | Credible Set | purple |
| chr17:36852594 | 17  | 36.85259 | 0.018974525 | Credible Set | purple |
| chr17:36857085 | 17  | 36.85708 | 0.018820602 | Credible Set | purple |
| chr17:36858903 | 17  | 36.85890 | 0.018974525 | Credible Set | purple |
| chr17:36858955 | 17  | 36.85896 | 0.018974525 | Credible Set | purple |
| chr17:36883876 | 17  | 36.88388 | 0.020112576 | Credible Set | purple |
| chr17:36948500 | 17  | 36.94850 | 0.021247355 | Credible Set | purple |
| chr17:37178457 | 17  | 37.17846 | 0.014950300 | Credible Set | purple |
| chr17:37241973 | 17  | 37.24197 | 0.015828467 | Credible Set | purple |
| chr17:37242059 | 17  | 37.24206 | 0.017167668 | Credible Set | purple |
| chr17:37271534 | 17  | 37.27153 | 0.017227009 | Credible Set | purple |
| chr17:37273627 | 17  | 37.27363 | 0.014371745 | Credible Set | purple |
| chr17:37273628 | 17  | 37.27363 | 0.014141616 | Credible Set | purple |
| chr17:37273636 | 17  | 37.27364 | 0.014230016 | Credible Set | purple |
| chr17:37503566 | 17  | 37.50357 | 0.003575854 | Credible Set | purple |
| chr17:37526332 | 17  | 37.52633 | 0.001443878 | Credible Set | purple |
| chr17:37526408 | 17  | 37.52641 | 0.001448747 | Credible Set | purple |
| chr17:37526413 | 17  | 37.52641 | 0.001480667 | Credible Set | purple |
| chr17:37574863 | 17  | 37.57486 | 0.001537708 | Credible Set | purple |
| chr17:37575322 | 17  | 37.57532 | 0.003429711 | Credible Set | purple |
| chr17:37575334 | 17  | 37.57533 | 0.003429711 | Credible Set | purple |
| chr17:37575341 | 17  | 37.57534 | 0.003429711 | Credible Set | purple |
| chr17:37575344 | 17  | 37.57534 | 0.003429711 | Credible Set | purple |
| chr17:37610173 | 17  | 37.61017 | 0.002685950 | Credible Set | purple |
| chr17:37610452 | 17  | 37.61045 | 0.002748952 | Credible Set | purple |
| chr17:37631225 | 17  | 37.63123 | 0.002599248 | Credible Set | purple |
| chr17:37631428 | 17  | 37.63143 | 0.002545401 | Credible Set | purple |
| chr17:37644696 | 17  | 37.64470 | 0.002348741 | Credible Set | purple |
| chr17:37676096 | 17  | 37.67610 | 0.002685890 | Credible Set | purple |
| chr17:37692132 | 17  | 37.69213 | 0.002685890 | Credible Set | purple |
| chr17:37695484 | 17  | 37.69548 | 0.003058205 | Credible Set | purple |
| chr17:37763996 | 17  | 37.76400 | 0.001353188 | Credible Set | purple |
| chr17:37835420 | 17  | 37.83542 | 0.002791536 | Credible Set | purple |
| chr17:37835736 | 17  | 37.83574 | 0.002756783 | Credible Set | purple |



Fine-mapping Regions

| snp            | chr | pos (Mb) | pp          | group        | color  |
|----------------|-----|----------|-------------|--------------|--------|
| chr17:37842881 | 17  | 37.84288 | 0.002680426 | Credible Set | purple |
| chr17:37903355 | 17  | 37.90335 | 0.002376706 | Credible Set | purple |
| chr17:37999788 | 17  | 37.99979 | 0.002685890 | Credible Set | purple |
| chr17:38455586 | 17  | 38.45559 | 0.002444826 | Credible Set | purple |
| chr17:39208793 | 17  | 39.20879 | 0.003297060 | Credible Set | purple |
| chr17:39382632 | 17  | 39.38263 | 0.003698378 | Credible Set | purple |
| chr17:39426246 | 17  | 39.42625 | 0.002470239 | Credible Set | purple |
| chr17:39437308 | 17  | 39.43731 | 0.002579331 | Credible Set | purple |
| chr17:39769349 | 17  | 39.76935 | 0.002059838 | Credible Set | purple |
| chr17:39780605 | 17  | 39.78061 | 0.002591185 | Credible Set | purple |
| chr17:39780934 | 17  | 39.78093 | 0.002126763 | Credible Set | purple |
| chr17:39853992 | 17  | 39.85399 | 0.002427523 | Credible Set | purple |
| chr17:39867231 | 17  | 39.86723 | 0.002069375 | Credible Set | purple |
| chr17:39983068 | 17  | 39.98307 | 0.002078934 | Credible Set | purple |
| chr17:40129553 | 17  | 40.12955 | 0.001939989 | Credible Set | purple |
| chr17:40303781 | 17  | 40.30378 | 0.002233659 | Credible Set | purple |
| chr17:40322995 | 17  | 40.32299 | 0.002678436 | Credible Set | purple |

F34 GBS, retic parameters cell hemoglobin distribution width

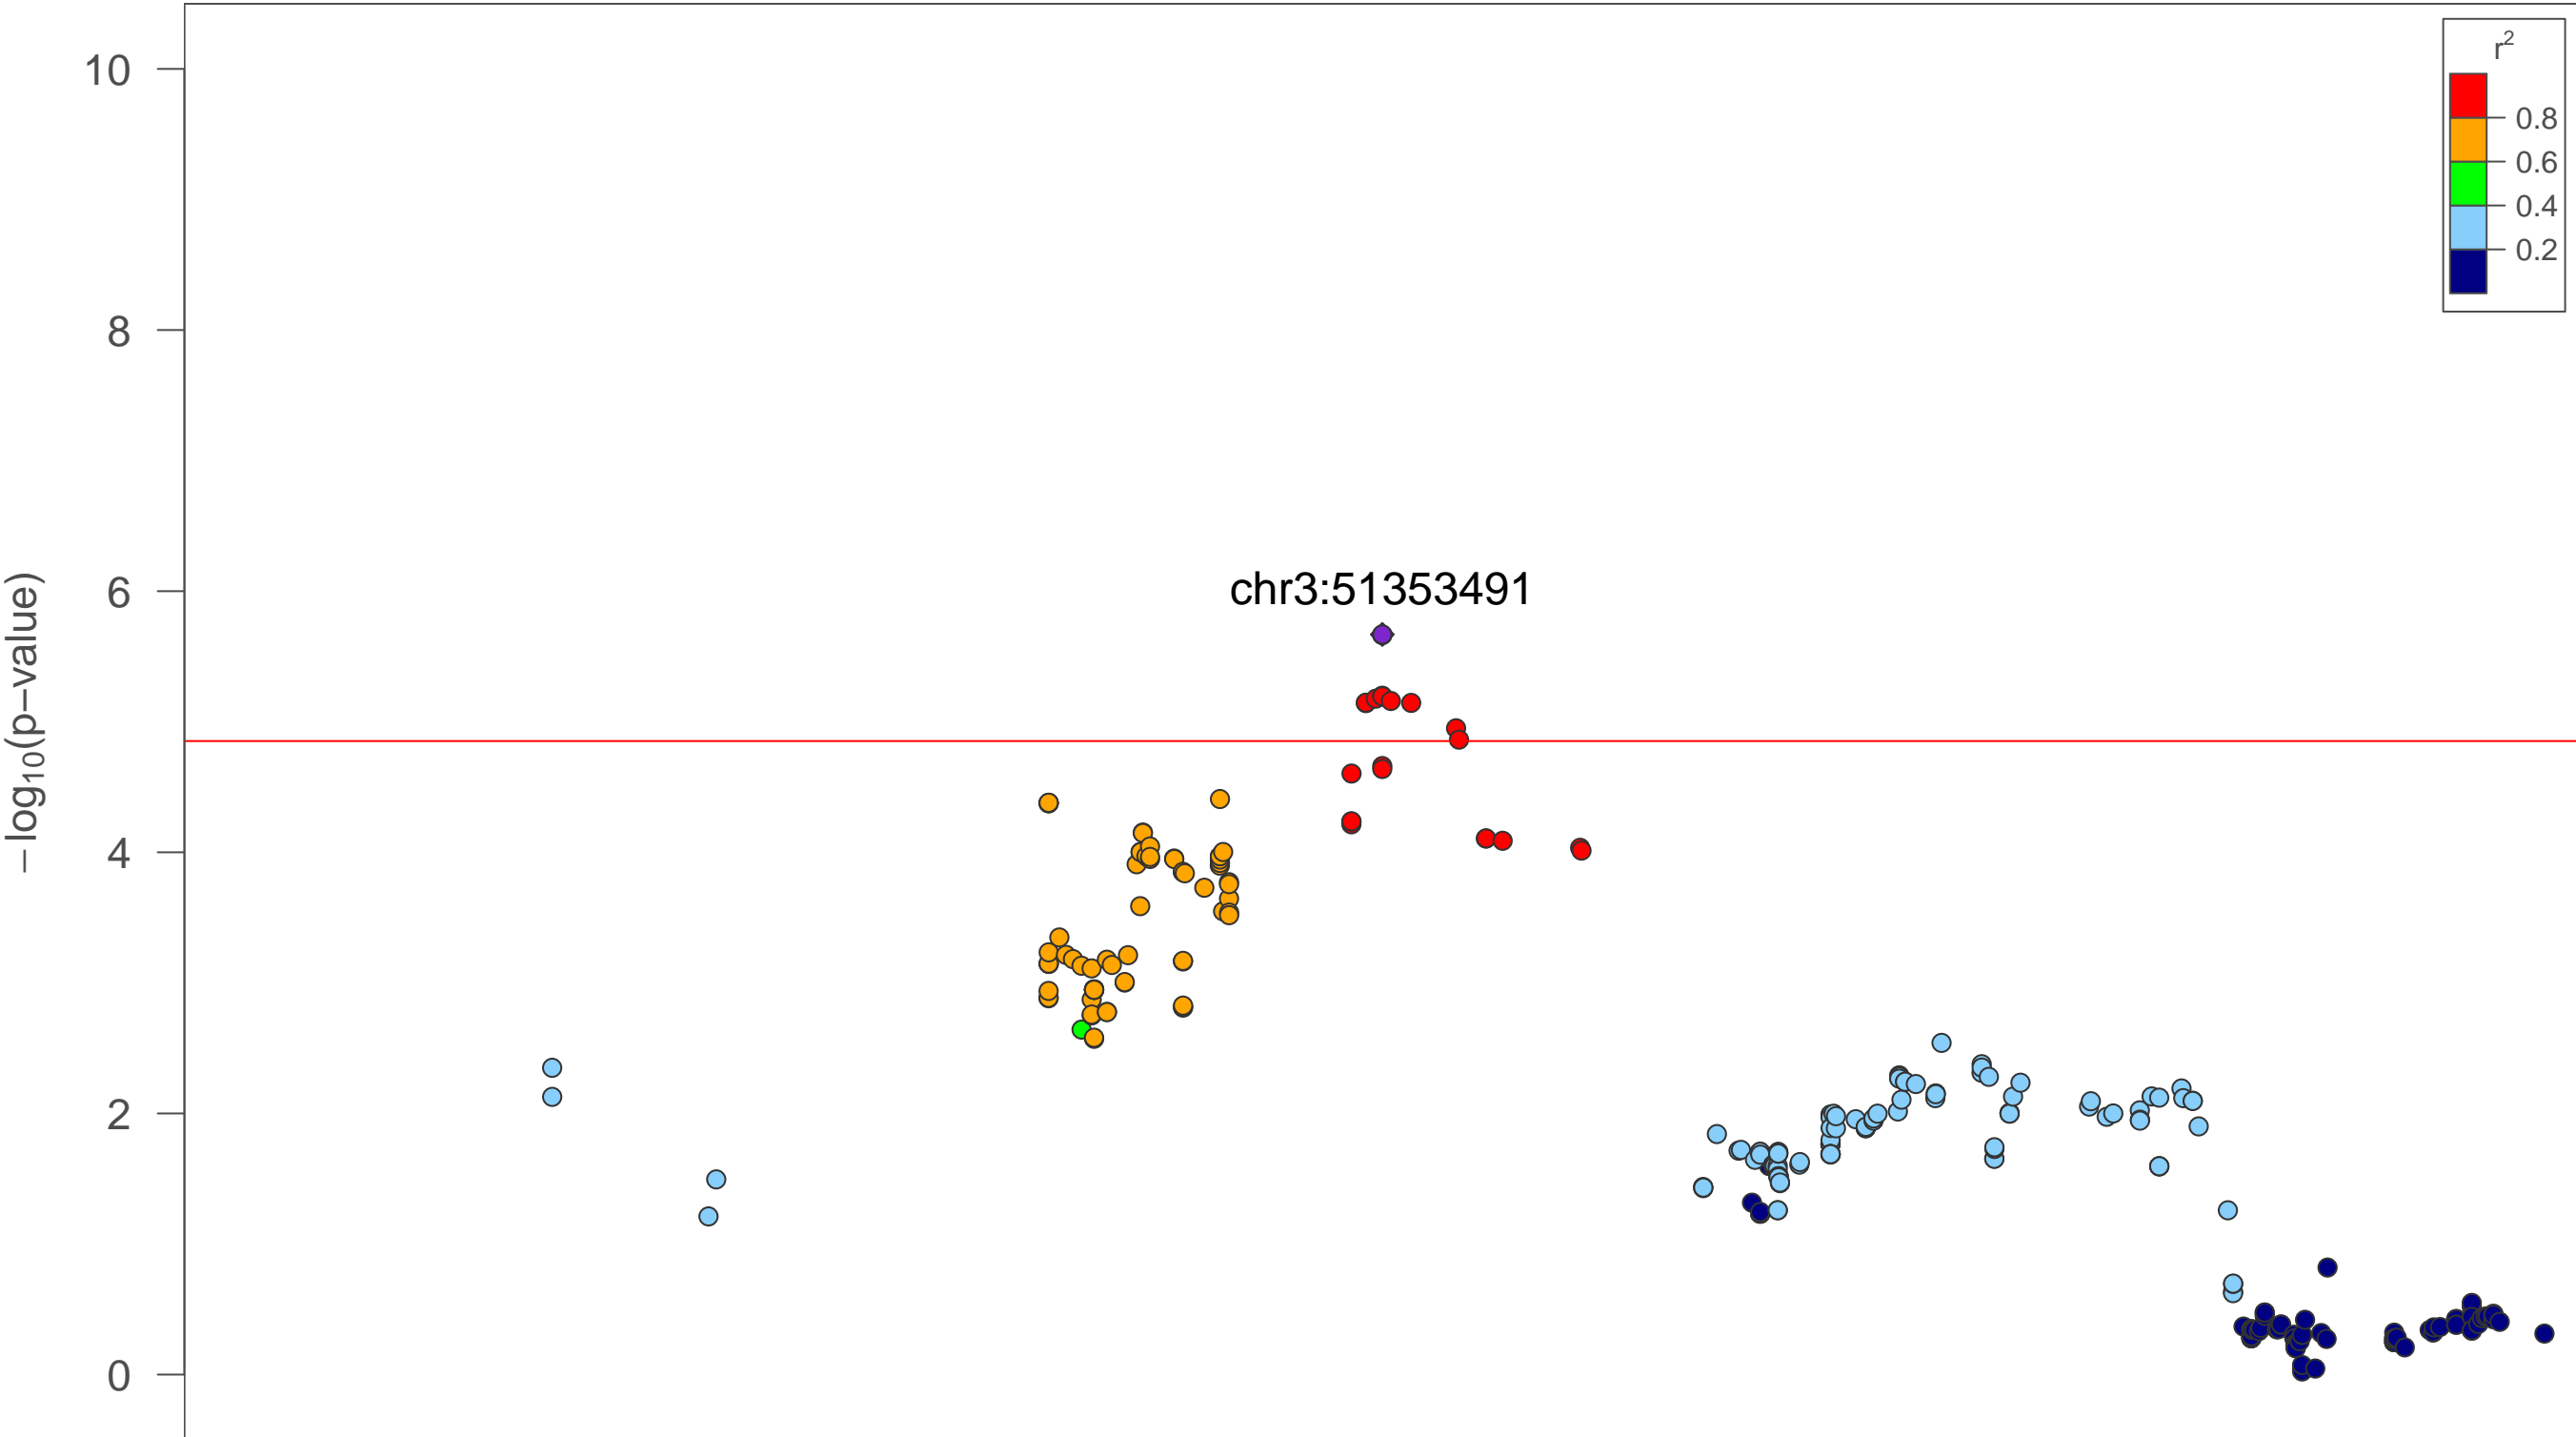

Credible Set

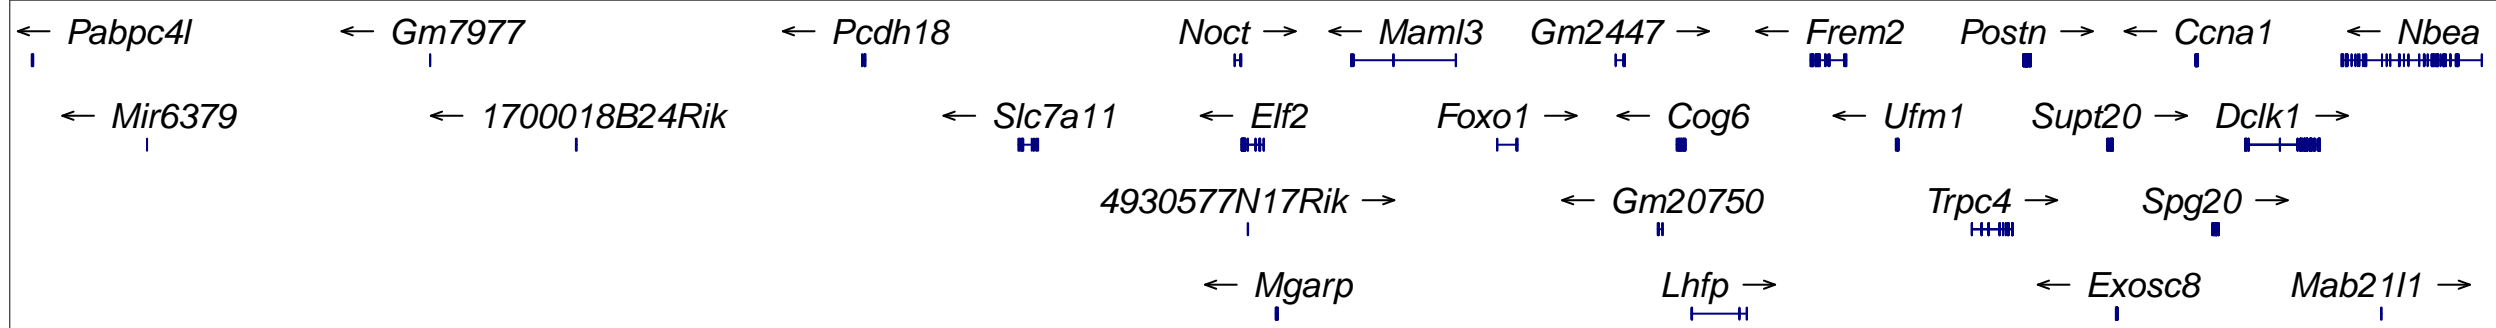

17 genes  
omitted

Position on chr3 (Mb)

date: Thu Oct 25 17:07:29 2018

build: F34GBS

display range: chr3:46353491–56353491 [46353491–56353491]

hilite range: 0 – 0 [ 0 – 0 ]

reference SNP: chr3:51353491

number of SNPs plotted: 283

min P-value: 2.14E–6 [chr3:51353491]

max P-value: 9.46E–1 [chr3:55192362]

omitted Genes: Ndufc1, Naa15, Rab33b

omitted Genes: Setd7, 5031434O11Rik, Mgst2

omitted Genes: Nhlrc3, Proser1, Stoml3

omitted Genes: Alg5, Smad9, Rfxap

omitted Genes: Sertm1, 4931419H13Rik, Ccdc169

omitted Genes: Sohlh2, 4933417G07Rik

Fine-mapping Regions

| snp           | chr | pos (Mb) | pp          | group        | color  |
|---------------|-----|----------|-------------|--------------|--------|
| chr3:51224536 | 3   | 51.22454 | 0.006549880 | Credible Set | purple |
| chr3:51224538 | 3   | 51.22454 | 0.006862850 | Credible Set | purple |
| chr3:51224542 | 3   | 51.22454 | 0.006880732 | Credible Set | purple |
| chr3:51224949 | 3   | 51.22495 | 0.015320677 | Credible Set | purple |
| chr3:51284978 | 3   | 51.28498 | 0.050073355 | Credible Set | purple |
| chr3:51285004 | 3   | 51.28500 | 0.050469758 | Credible Set | purple |
| chr3:51326496 | 3   | 51.32650 | 0.053967627 | Credible Set | purple |
| chr3:51353269 | 3   | 51.35327 | 0.056741272 | Credible Set | purple |
| chr3:51353361 | 3   | 51.35336 | 0.017369834 | Credible Set | purple |
| chr3:51353422 | 3   | 51.35342 | 0.016532821 | Credible Set | purple |
| chr3:51353461 | 3   | 51.35346 | 0.159007360 | Credible Set | purple |
| chr3:51353490 | 3   | 51.35349 | 0.158323691 | Credible Set | purple |
| chr3:51353491 | 3   | 51.35349 | 0.159783900 | Credible Set | purple |
| chr3:51353741 | 3   | 51.35374 | 0.056139059 | Credible Set | purple |
| chr3:51389257 | 3   | 51.38926 | 0.051905555 | Credible Set | purple |
| chr3:51473939 | 3   | 51.47394 | 0.050270008 | Credible Set | purple |
| chr3:51661337 | 3   | 51.66134 | 0.032781117 | Credible Set | purple |
| chr3:51673564 | 3   | 51.67356 | 0.027059421 | Credible Set | purple |
| chr3:51785724 | 3   | 51.78572 | 0.005167142 | Credible Set | purple |
| chr3:51786977 | 3   | 51.78698 | 0.005170855 | Credible Set | purple |
| chr3:51855671 | 3   | 51.85567 | 0.004975115 | Credible Set | purple |

F34 GBS, retic parameters cell hemoglobin distribution width

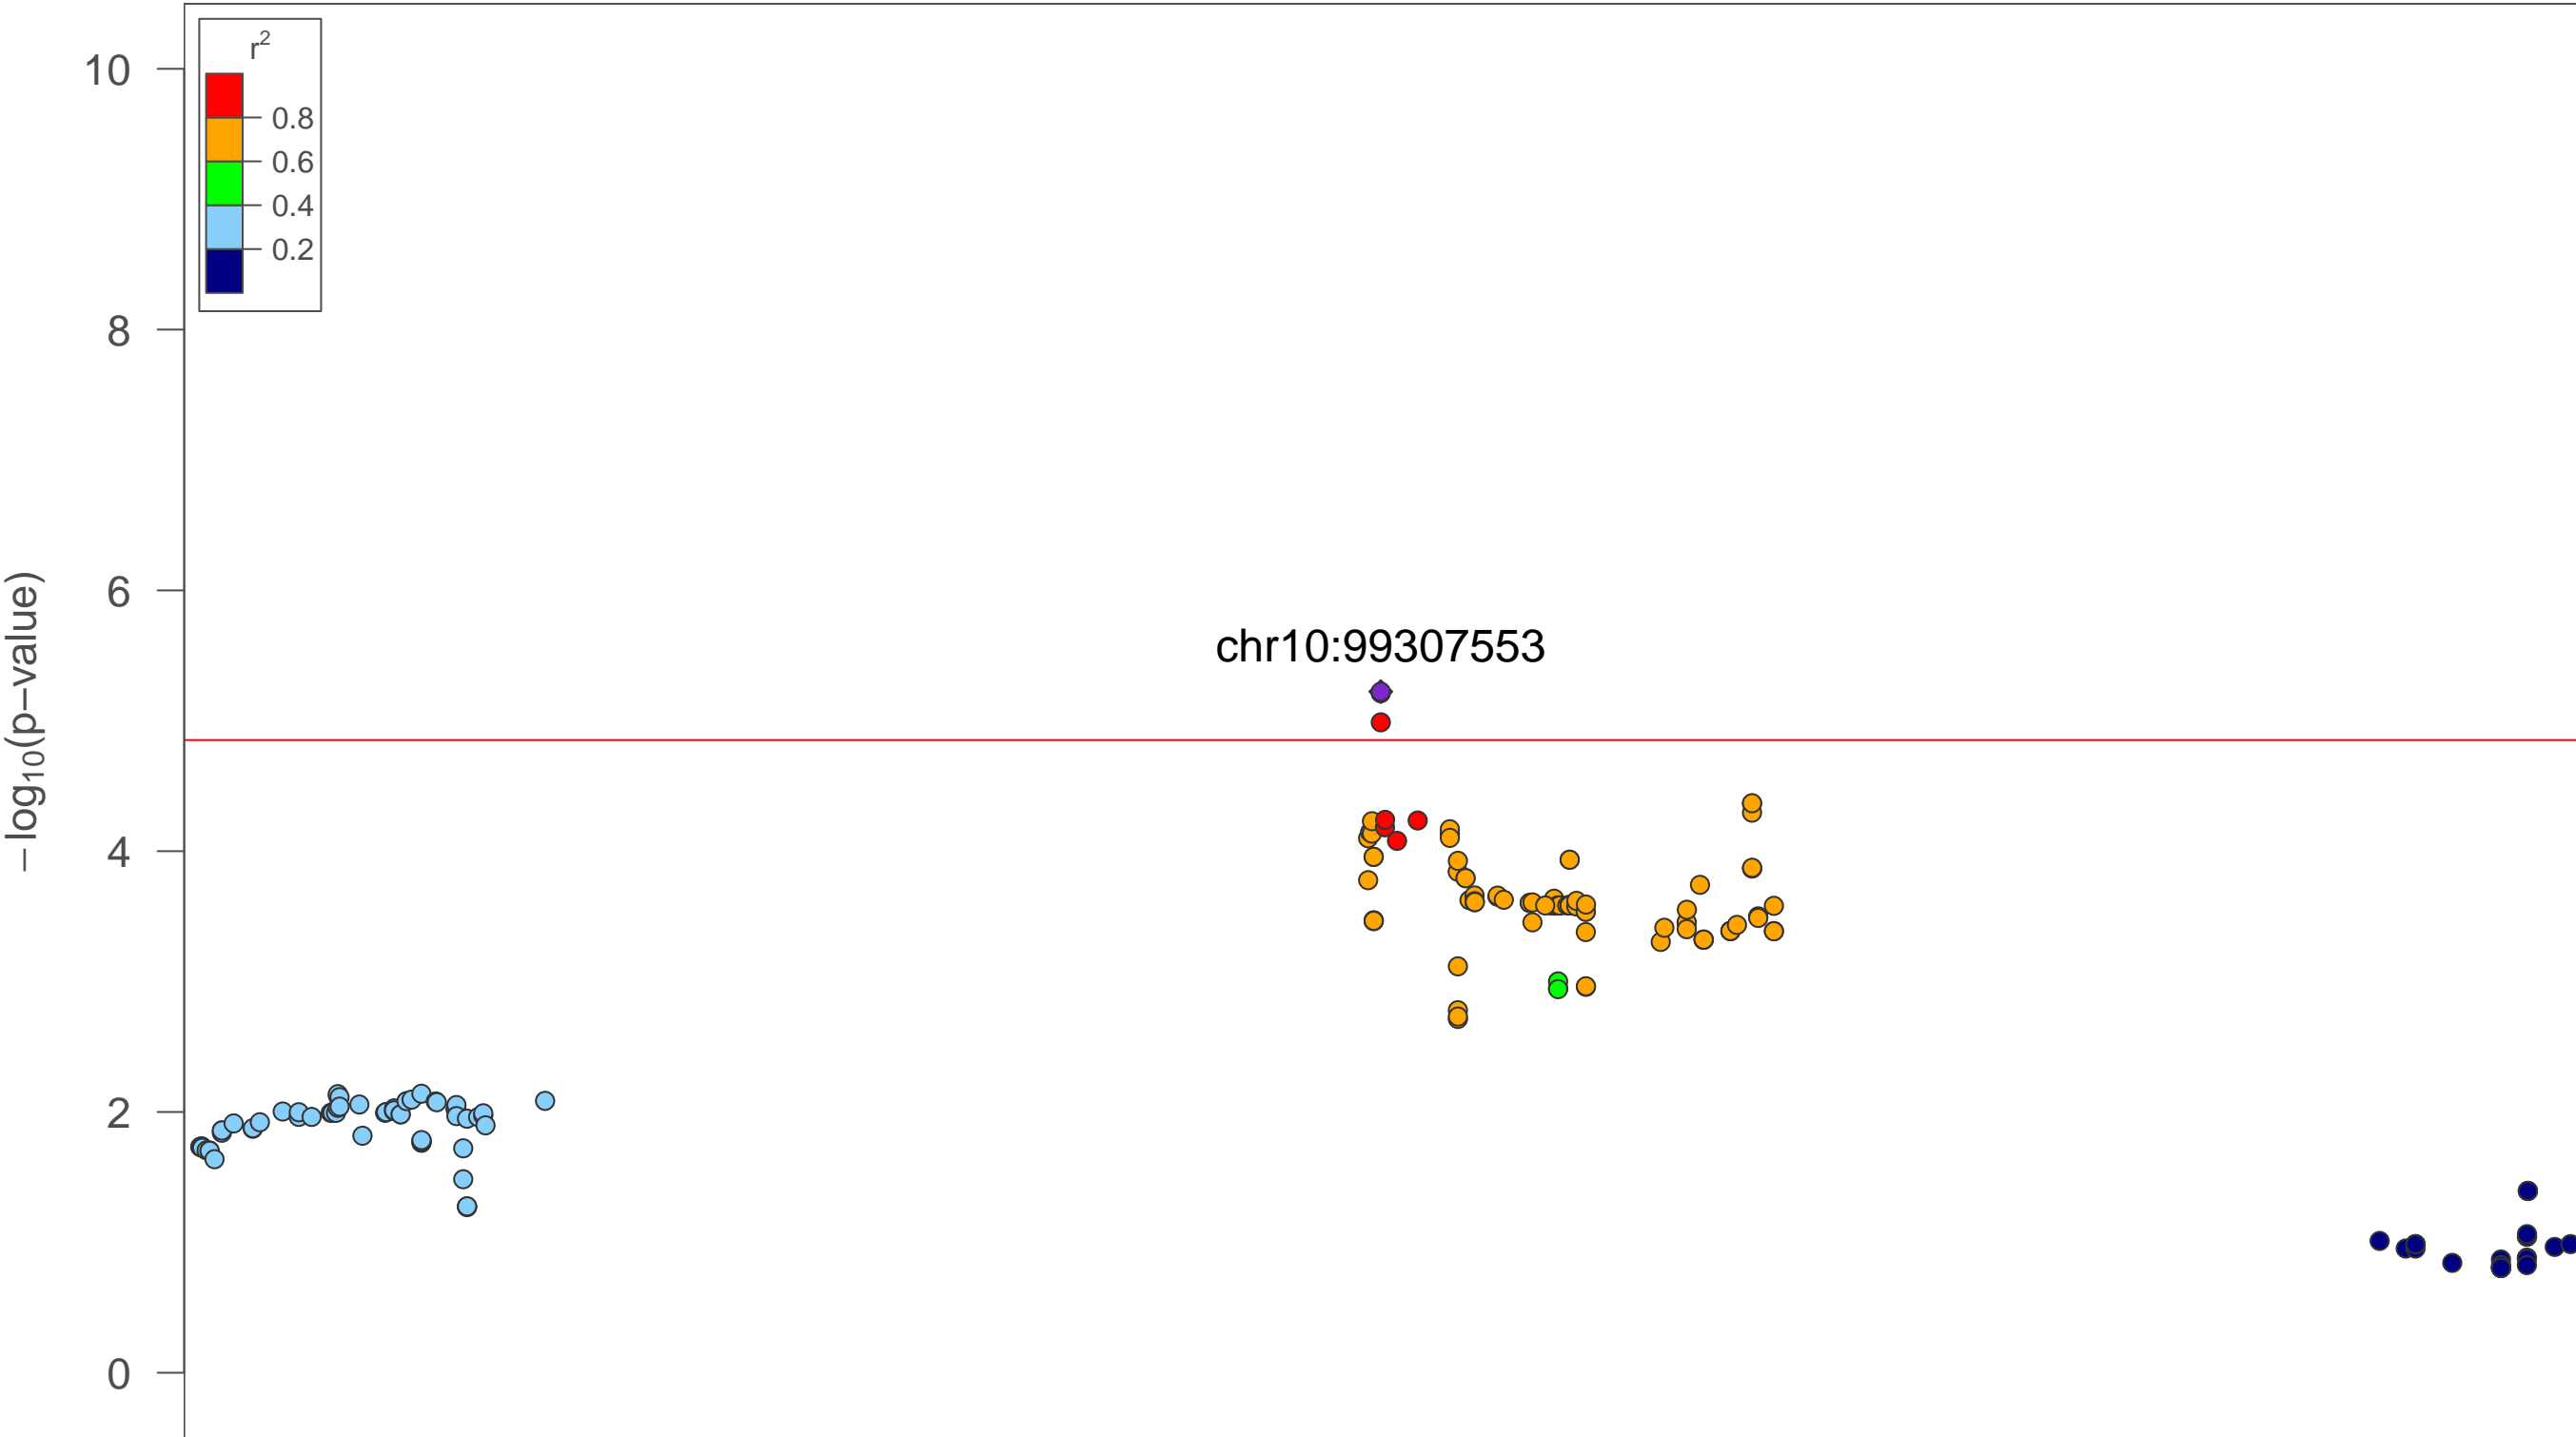

Credible Set

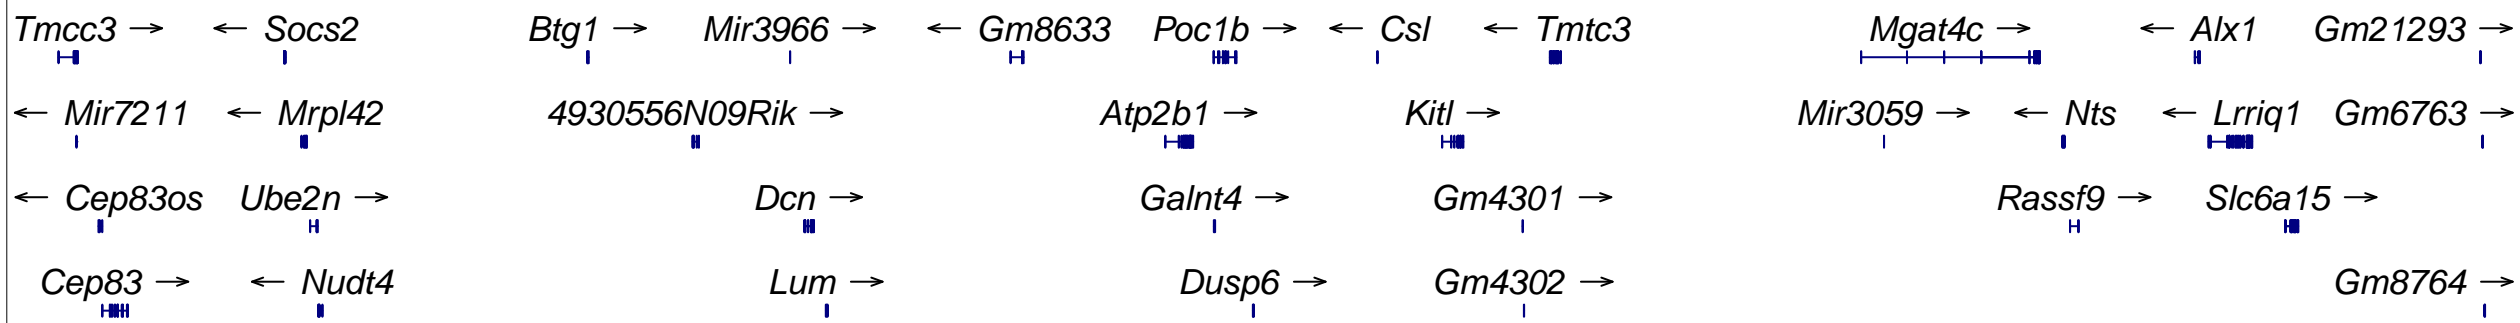

28 genes  
omitted

Position on chr10 (Mb)

date: Thu Oct 25 17:07:06 2018  
build: F34GBS  
display range: chr10:94307553–104307553 [94307553–104307553]  
hilite range: 0 – 0 [ 0 – 0 ]  
reference SNP: chr10:99307553  
number of SNPs plotted: 180  
min P-value: 5.98E–6 [chr10:99307553]  
max P-value: 1.57E–1 [chr10:103988206]  
omitted Genes: Plxnc1, Gm29684, Cradd  
omitted Genes: 2310039L15Rik, 5730420D15Rik, Mir3058  
omitted Genes: Eea1, 4930459C07Rik, 4930473O22Rik  
omitted Genes: Kera, Epyc, Gm10754  
omitted Genes: Ccer1, 4930525C09Rik, Gm20110  
omitted Genes: Gm18409, Gm4303, Gm4305  
omitted Genes: Gm4307, Gm4312, Cep290  
omitted Genes: 4930430F08Rik, 1700017N19Rik, Gm21304  
omitted Genes: Gm21312, Gm20765, Gm4340  
omitted Genes: Mir6411

Fine-mapping Regions

| snp            | chr | pos (Mb) | pp         | group        | color  |
|----------------|-----|----------|------------|--------------|--------|
| chr10:99307553 | 10  | 99.30755 | 0.33002136 | Credible Set | purple |
| chr10:99307573 | 10  | 99.30757 | 0.33002136 | Credible Set | purple |
| chr10:99307596 | 10  | 99.30760 | 0.20250564 | Credible Set | purple |
| chr10:99325139 | 10  | 99.32514 | 0.03365487 | Credible Set | purple |
| chr10:99325722 | 10  | 99.32572 | 0.03866595 | Credible Set | purple |
| chr10:99375519 | 10  | 99.37552 | 0.02709656 | Credible Set | purple |
| chr10:99461777 | 10  | 99.46178 | 0.03803425 | Credible Set | purple |

F34 GBS, retic parameters cell hemoglobin distribution width

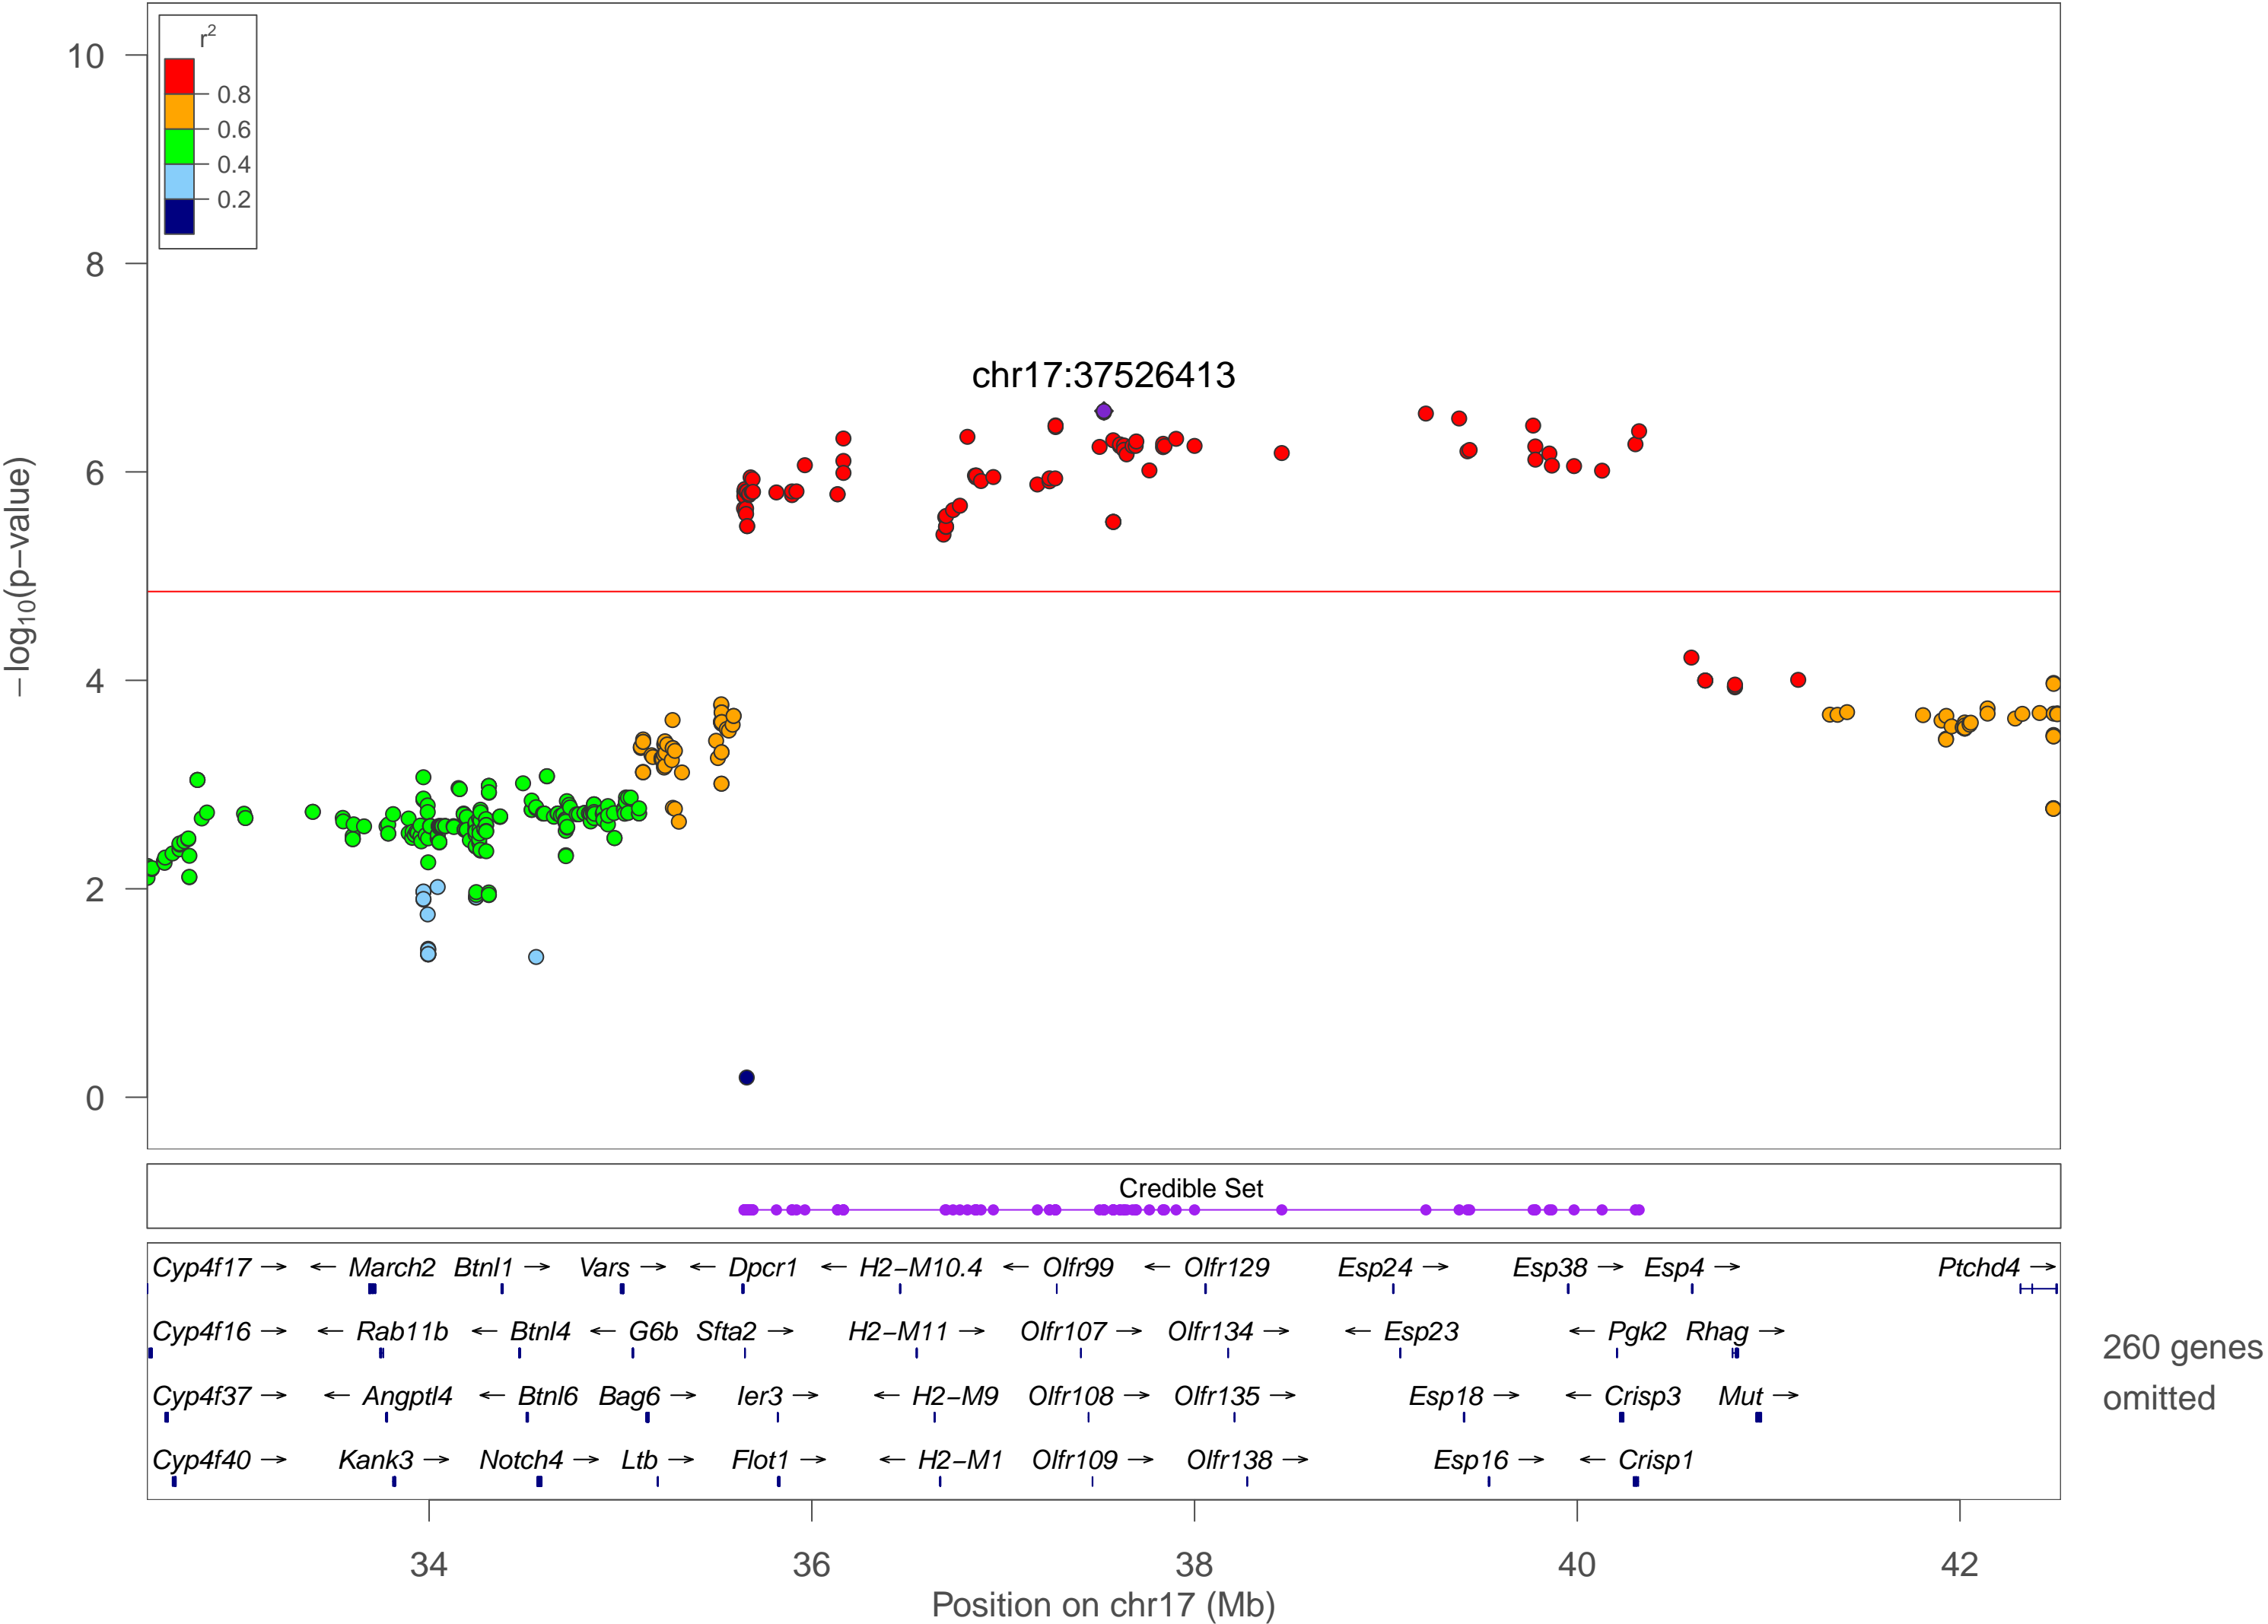



date: Thu Oct 25 17:07:20 2018

build: F34GBS

display range: chr17:32526413–42526413 [32526413–42526413]

hilite range: 0 – 0 [ 0 – 0 ]

reference SNP: chr17:37526413

number of SNPs plotted: 428

min P-value: 2.61E–7 [chr17:37526413]

max P-value: 6.46E–1 [chr17:35659711]

omitted Genes: Cyp4f15, Zfp871, Zfp811

omitted Genes: Zfp799, Zfp870, Cyp4f14

omitted Genes: Cyp4f13, Cyp4f41-ps, Zfp472

omitted Genes: Zfp952, Zfp763, 4921501E09Rik

omitted Genes: Zfp563, Morc2b, Olfr55

omitted Genes: Olfr239, Gm4461, Zfp955a

omitted Genes: Olfr63, Zfp955b, Zfp81

omitted Genes: Zfp101, Actl9, Adamts10

omitted Genes: Myo1f, Zfp414, Pram1

omitted Genes: Hnrnpm, Rps28, Ndufa7

omitted Genes: Cd320, Kifc1, Gm27740

omitted Genes: Platr17, BC051226, Daxx

omitted Genes: Zbtb22, Tapbp, Rgl2

omitted Genes: Pfdn6, Wdr46, B3galt4

omitted Genes: Rps18, Vps52, H2–K2

omitted Genes: AA388235, H2–K1, Ring1

omitted Genes: Mir219a–1, Mir219c, H2–Ke6

omitted Genes: Slc39a7, Rxrb, Col11a2

omitted Genes: BC051537, H2–Oa, Brd2

omitted Genes: H2–DMA, H2–DMb2, H2–DMb1

omitted Genes: Psmb9, Tap1, Psmb8

omitted Genes: Tap2, H2–Ob, H2–Ab1

omitted Genes: H2–Aa, H2–Eb1, H2–Eb2

omitted Genes: Btl2, BC051142, Btl5-ps

omitted Genes: Gpsm3, Pbx2, Ager

omitted Genes: Rnf5, Agpat1, Egfl8

omitted Genes: Ppt2, Prt1, Fkbp1

omitted Genes: Atf6b, Tnxb, C4b

omitted Genes: Cyp21a1, C4a, Stk19

omitted Genes: Dxo, Skiv2l, Mir6971

omitted Genes: Mir6970, Nelfe, Cfb

omitted Genes: Mir6972, C2, Zbtb12

Make more plots at <http://csg.sph.umich.edu/locuszoom/>

## Fine-mapping Regions

| snp            | chr | pos (Mb) | pp          | group        | color  |
|----------------|-----|----------|-------------|--------------|--------|
| chr17:35645542 | 17  | 35.64554 | 0.004231237 | Credible Set | purple |
| chr17:35647446 | 17  | 35.64745 | 0.006073973 | Credible Set | purple |
| chr17:35647569 | 17  | 35.64757 | 0.006073973 | Credible Set | purple |
| chr17:35647605 | 17  | 35.64760 | 0.005547333 | Credible Set | purple |
| chr17:35647647 | 17  | 35.64765 | 0.005475530 | Credible Set | purple |
| chr17:35649675 | 17  | 35.64968 | 0.006384669 | Credible Set | purple |
| chr17:35653842 | 17  | 35.65384 | 0.003890164 | Credible Set | purple |
| chr17:35656227 | 17  | 35.65623 | 0.004226838 | Credible Set | purple |
| chr17:35656237 | 17  | 35.65624 | 0.003767926 | Credible Set | purple |
| chr17:35657043 | 17  | 35.65704 | 0.006073973 | Credible Set | purple |
| chr17:35659591 | 17  | 35.65959 | 0.006073973 | Credible Set | purple |
| chr17:35659790 | 17  | 35.65979 | 0.006053563 | Credible Set | purple |
| chr17:35661925 | 17  | 35.66192 | 0.002905546 | Credible Set | purple |
| chr17:35661953 | 17  | 35.66195 | 0.002908672 | Credible Set | purple |
| chr17:35662044 | 17  | 35.66204 | 0.006073973 | Credible Set | purple |
| chr17:35671886 | 17  | 35.67189 | 0.005621736 | Credible Set | purple |
| chr17:35672608 | 17  | 35.67261 | 0.005780892 | Credible Set | purple |
| chr17:35680171 | 17  | 35.68017 | 0.008183165 | Credible Set | purple |
| chr17:35685462 | 17  | 35.68546 | 0.006015166 | Credible Set | purple |
| chr17:35690117 | 17  | 35.69012 | 0.007886011 | Credible Set | purple |
| chr17:35692366 | 17  | 35.69237 | 0.006019554 | Credible Set | purple |
| chr17:35814797 | 17  | 35.81480 | 0.005943021 | Credible Set | purple |
| chr17:35896309 | 17  | 35.89631 | 0.005615817 | Credible Set | purple |
| chr17:35896336 | 17  | 35.89634 | 0.006072269 | Credible Set | purple |
| chr17:35919532 | 17  | 35.91953 | 0.006073973 | Credible Set | purple |
| chr17:35963419 | 17  | 35.96342 | 0.010599888 | Credible Set | purple |
| chr17:36134373 | 17  | 36.13437 | 0.005718160 | Credible Set | purple |
| chr17:36134388 | 17  | 36.13439 | 0.005718160 | Credible Set | purple |
| chr17:36164938 | 17  | 36.16494 | 0.018723323 | Credible Set | purple |
| chr17:36164968 | 17  | 36.16497 | 0.011608797 | Credible Set | purple |
| chr17:36165054 | 17  | 36.16505 | 0.008997770 | Credible Set | purple |
| chr17:36696968 | 17  | 36.69697 | 0.003519335 | Credible Set | purple |
| chr17:36701690 | 17  | 36.70169 | 0.003606588 | Credible Set | purple |
| chr17:36737772 | 17  | 36.73777 | 0.004082546 | Credible Set | purple |
| chr17:36773709 | 17  | 36.77371 | 0.004483641 | Credible Set | purple |
| chr17:36813020 | 17  | 36.81302 | 0.019401763 | Credible Set | purple |

## Fine-mapping Regions

| snp            | chr | pos (Mb) | pp          | group        | color  |
|----------------|-----|----------|-------------|--------------|--------|
| chr17:36852594 | 17  | 36.85259 | 0.008506659 | Credible Set | purple |
| chr17:36857085 | 17  | 36.85708 | 0.008186433 | Credible Set | purple |
| chr17:36858903 | 17  | 36.85890 | 0.008506659 | Credible Set | purple |
| chr17:36858955 | 17  | 36.85896 | 0.008506659 | Credible Set | purple |
| chr17:36883876 | 17  | 36.88388 | 0.007572203 | Credible Set | purple |
| chr17:36948500 | 17  | 36.94850 | 0.008241514 | Credible Set | purple |
| chr17:37178457 | 17  | 37.17846 | 0.007036269 | Credible Set | purple |
| chr17:37241973 | 17  | 37.24197 | 0.007529506 | Credible Set | purple |
| chr17:37242059 | 17  | 37.24206 | 0.008017601 | Credible Set | purple |
| chr17:37271534 | 17  | 37.27153 | 0.008004896 | Credible Set | purple |
| chr17:37273627 | 17  | 37.27363 | 0.024742759 | Credible Set | purple |
| chr17:37273628 | 17  | 37.27363 | 0.023882663 | Credible Set | purple |
| chr17:37273636 | 17  | 37.27364 | 0.024462362 | Credible Set | purple |
| chr17:37503566 | 17  | 37.50357 | 0.015651385 | Credible Set | purple |
| chr17:37526332 | 17  | 37.52633 | 0.032673092 | Credible Set | purple |
| chr17:37526408 | 17  | 37.52641 | 0.033201054 | Credible Set | purple |
| chr17:37526413 | 17  | 37.52641 | 0.033618526 | Credible Set | purple |
| chr17:37574863 | 17  | 37.57486 | 0.018025221 | Credible Set | purple |
| chr17:37575322 | 17  | 37.57532 | 0.003180852 | Credible Set | purple |
| chr17:37575334 | 17  | 37.57533 | 0.003180852 | Credible Set | purple |
| chr17:37575341 | 17  | 37.57534 | 0.003180852 | Credible Set | purple |
| chr17:37575344 | 17  | 37.57534 | 0.003180852 | Credible Set | purple |
| chr17:37610173 | 17  | 37.61017 | 0.015890002 | Credible Set | purple |
| chr17:37610452 | 17  | 37.61045 | 0.016510792 | Credible Set | purple |
| chr17:37631225 | 17  | 37.63123 | 0.016137959 | Credible Set | purple |
| chr17:37631428 | 17  | 37.63143 | 0.014707317 | Credible Set | purple |
| chr17:37644696 | 17  | 37.64470 | 0.013352743 | Credible Set | purple |
| chr17:37676096 | 17  | 37.67610 | 0.015988342 | Credible Set | purple |
| chr17:37692132 | 17  | 37.69213 | 0.015988342 | Credible Set | purple |
| chr17:37695484 | 17  | 37.69548 | 0.017572581 | Credible Set | purple |
| chr17:37763996 | 17  | 37.76400 | 0.009488744 | Credible Set | purple |
| chr17:37835420 | 17  | 37.83542 | 0.015582281 | Credible Set | purple |
| chr17:37835736 | 17  | 37.83574 | 0.016721185 | Credible Set | purple |
| chr17:37842881 | 17  | 37.84288 | 0.015929333 | Credible Set | purple |
| chr17:37903355 | 17  | 37.90335 | 0.018594999 | Credible Set | purple |
| chr17:37999788 | 17  | 37.99979 | 0.015988342 | Credible Set | purple |

Fine-mapping Regions

| snp            | chr | pos (Mb) | pp          | group        | color  |
|----------------|-----|----------|-------------|--------------|--------|
| chr17:38455586 | 17  | 38.45559 | 0.013732756 | Credible Set | purple |
| chr17:39208793 | 17  | 39.20879 | 0.031852409 | Credible Set | purple |
| chr17:39382632 | 17  | 39.38263 | 0.028676486 | Credible Set | purple |
| chr17:39426246 | 17  | 39.42625 | 0.014247864 | Credible Set | purple |
| chr17:39437308 | 17  | 39.43731 | 0.014662066 | Credible Set | purple |
| chr17:39769349 | 17  | 39.76935 | 0.024653296 | Credible Set | purple |
| chr17:39780605 | 17  | 39.78061 | 0.015799966 | Credible Set | purple |
| chr17:39780934 | 17  | 39.78093 | 0.011937208 | Credible Set | purple |
| chr17:39853992 | 17  | 39.85399 | 0.013589919 | Credible Set | purple |
| chr17:39867231 | 17  | 39.86723 | 0.010518197 | Credible Set | purple |
| chr17:39983068 | 17  | 39.98307 | 0.010399961 | Credible Set | purple |
| chr17:40129553 | 17  | 40.12955 | 0.009439661 | Credible Set | purple |
| chr17:40303781 | 17  | 40.30378 | 0.016558534 | Credible Set | purple |
| chr17:40322995 | 17  | 40.32299 | 0.021851332 | Credible Set | purple |

F34 GBS, retic parameters red cell distribution width

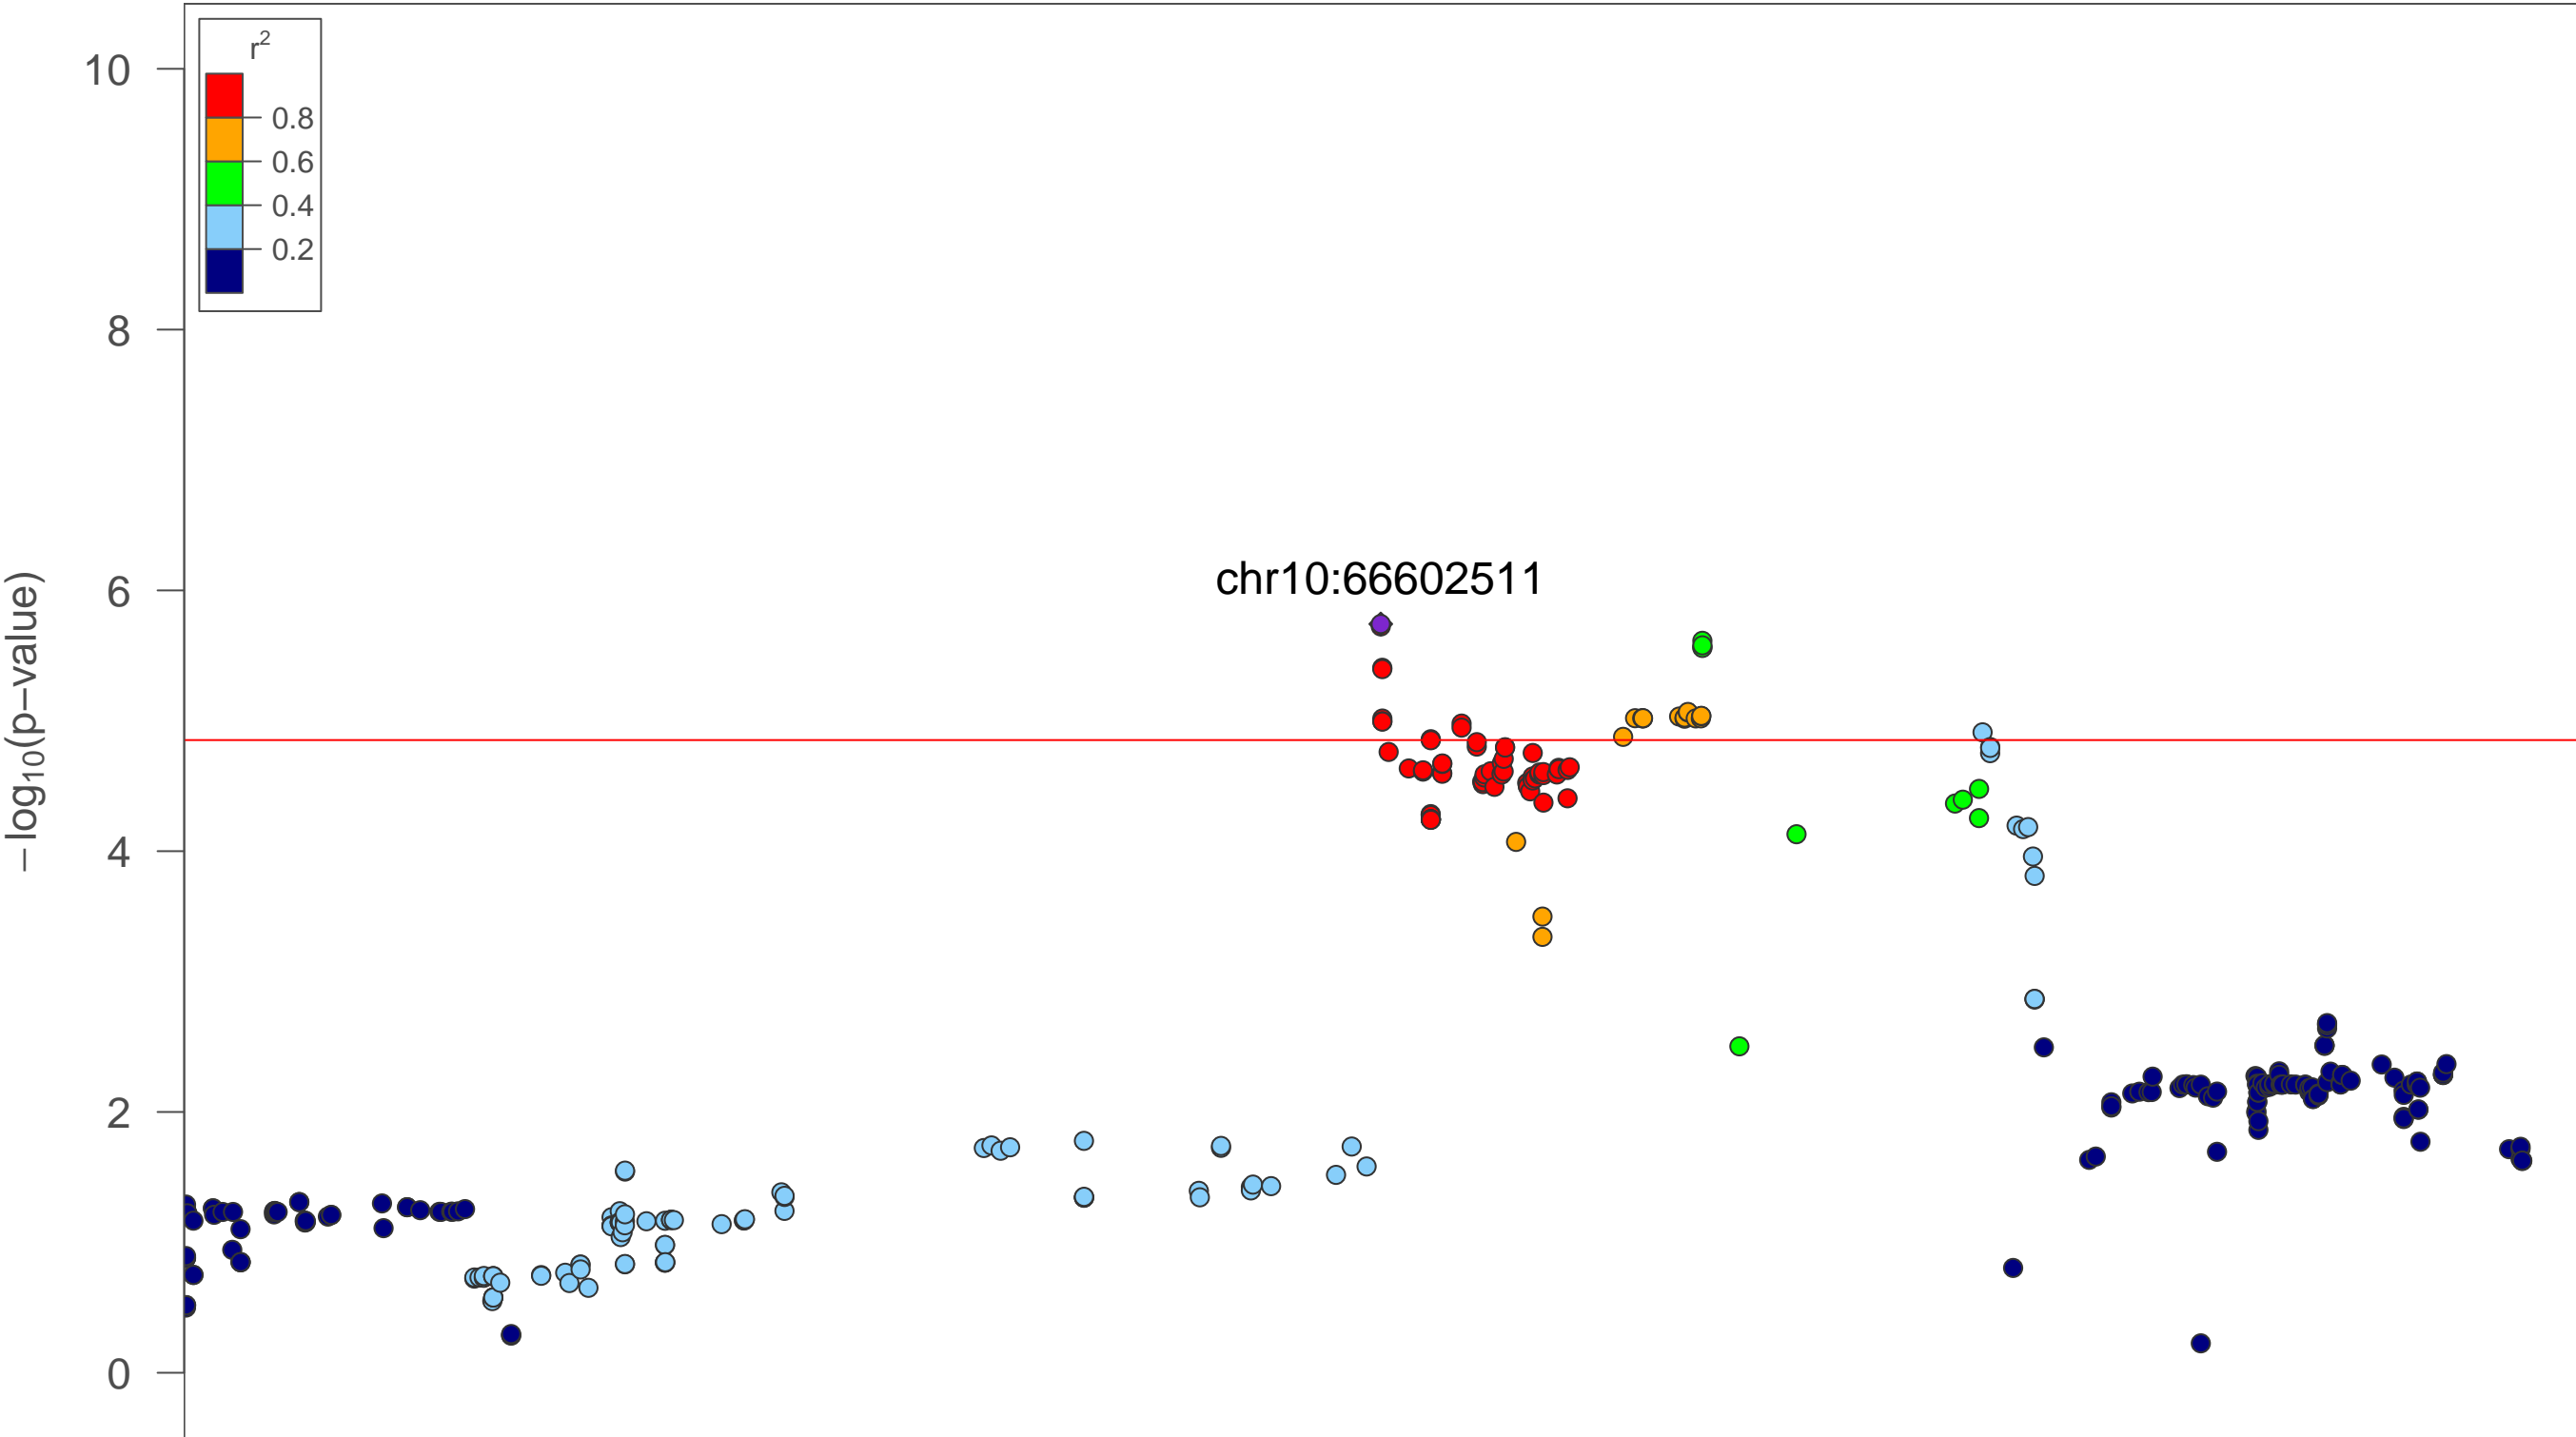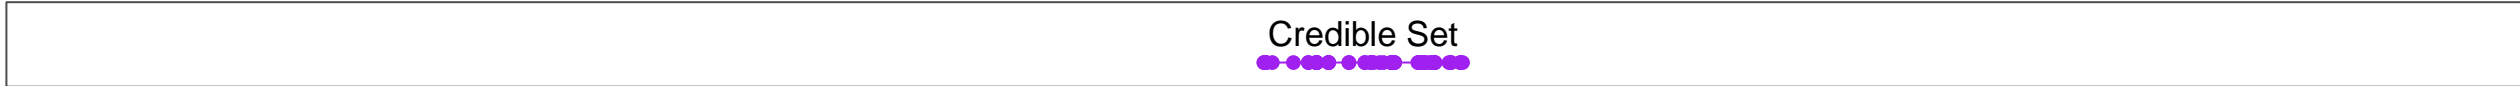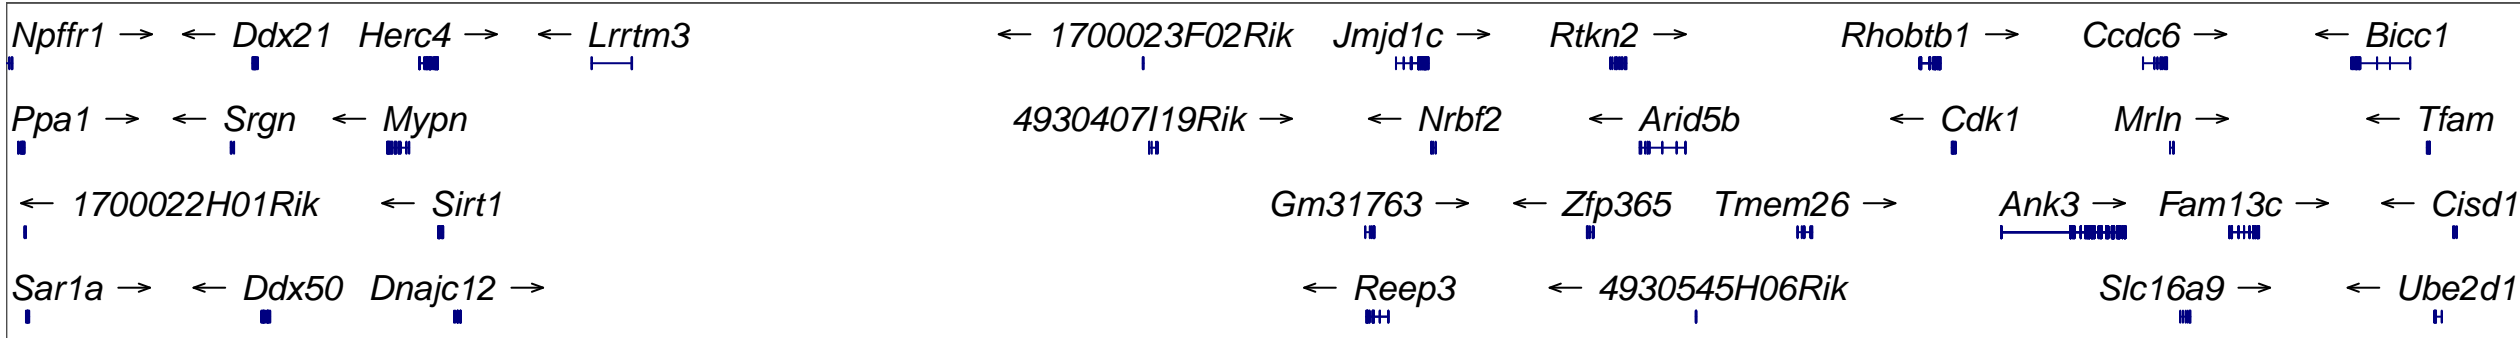

39 genes  
omitted

date: Thu Oct 25 17:07:38 2018

build: F34GBS

display range: chr10:61602511–71602511 [61602511–71602511]

hilite range: 0 – 0 [ 0 – 0 ]

reference SNP: chr10:66602511

number of SNPs plotted: 346

min P-value: 1.81E–6 [chr10:66602511]

max P-value: 5.94E–1 [chr10:70028591]

omitted Genes: Tysnd1, Aifm2, H2afy2

omitted Genes: Mir5108, Col13a1, Gm5424

omitted Genes: 2010107G23Rik, Neurog3, Tspan15

omitted Genes: Mir7662, Tacr2, Hk1

omitted Genes: Hk1os, Hkdc1, Supv3l1

omitted Genes: 4930507D05Rik, Vps26a, Kif1bp

omitted Genes: Stox1, Mir7215, Ccar1

omitted Genes: Snord98, Tet1, Slc25a16

omitted Genes: Dna2, Rufy2, Hnrnph3

omitted Genes: Pbld2, Pbld1, Atoh7

omitted Genes: Ctnna3, Egr2, Ado

omitted Genes: 1700040L02Rik, Phyhipl, D630013N20Rik

omitted Genes: C730027H18Rik, 1700113B09Rik, lpmk

## Fine-mapping Regions

| snp            | chr | pos (Mb) | pp          | group        | color  |
|----------------|-----|----------|-------------|--------------|--------|
| chr10:66602509 | 10  | 66.60251 | 0.114957231 | Credible Set | purple |
| chr10:66602511 | 10  | 66.60251 | 0.114957231 | Credible Set | purple |
| chr10:66608856 | 10  | 66.60886 | 0.059113686 | Credible Set | purple |
| chr10:66608885 | 10  | 66.60889 | 0.059113686 | Credible Set | purple |
| chr10:66609052 | 10  | 66.60905 | 0.024600070 | Credible Set | purple |
| chr10:66609080 | 10  | 66.60908 | 0.024600070 | Credible Set | purple |
| chr10:66609124 | 10  | 66.60912 | 0.024600070 | Credible Set | purple |
| chr10:66635369 | 10  | 66.63537 | 0.014827777 | Credible Set | purple |
| chr10:66719524 | 10  | 66.71952 | 0.011118828 | Credible Set | purple |
| chr10:66778997 | 10  | 66.77900 | 0.010270821 | Credible Set | purple |
| chr10:66779040 | 10  | 66.77904 | 0.010677544 | Credible Set | purple |
| chr10:66811101 | 10  | 66.81110 | 0.005123930 | Credible Set | purple |
| chr10:66811116 | 10  | 66.81112 | 0.005032271 | Credible Set | purple |
| chr10:66811497 | 10  | 66.81150 | 0.017842867 | Credible Set | purple |
| chr10:66811529 | 10  | 66.81153 | 0.017842867 | Credible Set | purple |
| chr10:66811581 | 10  | 66.81158 | 0.004697080 | Credible Set | purple |
| chr10:66811611 | 10  | 66.81161 | 0.004697080 | Credible Set | purple |
| chr10:66811619 | 10  | 66.81162 | 0.004697080 | Credible Set | purple |
| chr10:66811684 | 10  | 66.81168 | 0.004697080 | Credible Set | purple |
| chr10:66859150 | 10  | 66.85915 | 0.010270821 | Credible Set | purple |
| chr10:66859163 | 10  | 66.85916 | 0.010270821 | Credible Set | purple |
| chr10:66859201 | 10  | 66.85920 | 0.012124524 | Credible Set | purple |
| chr10:66859671 | 10  | 66.85967 | 0.012124524 | Credible Set | purple |
| chr10:66940094 | 10  | 66.94009 | 0.024600070 | Credible Set | purple |
| chr10:66940121 | 10  | 66.94012 | 0.022459976 | Credible Set | purple |
| chr10:67003583 | 10  | 67.00358 | 0.015709767 | Credible Set | purple |
| chr10:67003588 | 10  | 67.00359 | 0.016706709 | Credible Set | purple |
| chr10:67026213 | 10  | 67.02621 | 0.008918899 | Credible Set | purple |
| chr10:67029219 | 10  | 67.02922 | 0.008371125 | Credible Set | purple |
| chr10:67029237 | 10  | 67.02924 | 0.008918899 | Credible Set | purple |
| chr10:67034406 | 10  | 67.03441 | 0.009545893 | Credible Set | purple |
| chr10:67036263 | 10  | 67.03626 | 0.009894723 | Credible Set | purple |
| chr10:67061736 | 10  | 67.06174 | 0.010677544 | Credible Set | purple |
| chr10:67077389 | 10  | 67.07739 | 0.008122366 | Credible Set | purple |
| chr10:67107858 | 10  | 67.10786 | 0.010270821 | Credible Set | purple |
| chr10:67107945 | 10  | 67.10795 | 0.009894723 | Credible Set | purple |

# Fine-mapping Regions

| snp            | chr | pos (Mb) | pp          | group        | color  |
|----------------|-----|----------|-------------|--------------|--------|
| chr10:67108562 | 10  | 67.10856 | 0.012124524 | Credible Set | purple |
| chr10:67115847 | 10  | 67.11585 | 0.010677544 | Credible Set | purple |
| chr10:67116164 | 10  | 67.11616 | 0.012701061 | Credible Set | purple |
| chr10:67121830 | 10  | 67.12183 | 0.015709767 | Credible Set | purple |
| chr10:67121898 | 10  | 67.12190 | 0.015709767 | Credible Set | purple |
| chr10:67214197 | 10  | 67.21420 | 0.008636086 | Credible Set | purple |
| chr10:67217456 | 10  | 67.21746 | 0.008122366 | Credible Set | purple |
| chr10:67217505 | 10  | 67.21751 | 0.008122366 | Credible Set | purple |
| chr10:67226747 | 10  | 67.22675 | 0.007459588 | Credible Set | purple |
| chr10:67237234 | 10  | 67.23723 | 0.009545893 | Credible Set | purple |
| chr10:67237236 | 10  | 67.23724 | 0.008918899 | Credible Set | purple |
| chr10:67237389 | 10  | 67.23739 | 0.014041816 | Credible Set | purple |
| chr10:67246731 | 10  | 67.24673 | 0.009221448 | Credible Set | purple |
| chr10:67264982 | 10  | 67.26498 | 0.009894723 | Credible Set | purple |
| chr10:67265380 | 10  | 67.26538 | 0.010270821 | Credible Set | purple |
| chr10:67281545 | 10  | 67.28154 | 0.009894723 | Credible Set | purple |
| chr10:67281940 | 10  | 67.28194 | 0.010270821 | Credible Set | purple |
| chr10:67282089 | 10  | 67.28209 | 0.006274143 | Credible Set | purple |
| chr10:67338317 | 10  | 67.33832 | 0.009894723 | Credible Set | purple |
| chr10:67345731 | 10  | 67.34573 | 0.011118828 | Credible Set | purple |
| chr10:67346184 | 10  | 67.34618 | 0.011118828 | Credible Set | purple |
| chr10:67382855 | 10  | 67.38286 | 0.006731257 | Credible Set | purple |
| chr10:67383022 | 10  | 67.38302 | 0.010677544 | Credible Set | purple |
| chr10:67391783 | 10  | 67.39178 | 0.011118828 | Credible Set | purple |



F34 GBS, retic parameters hemoglobin distribution width

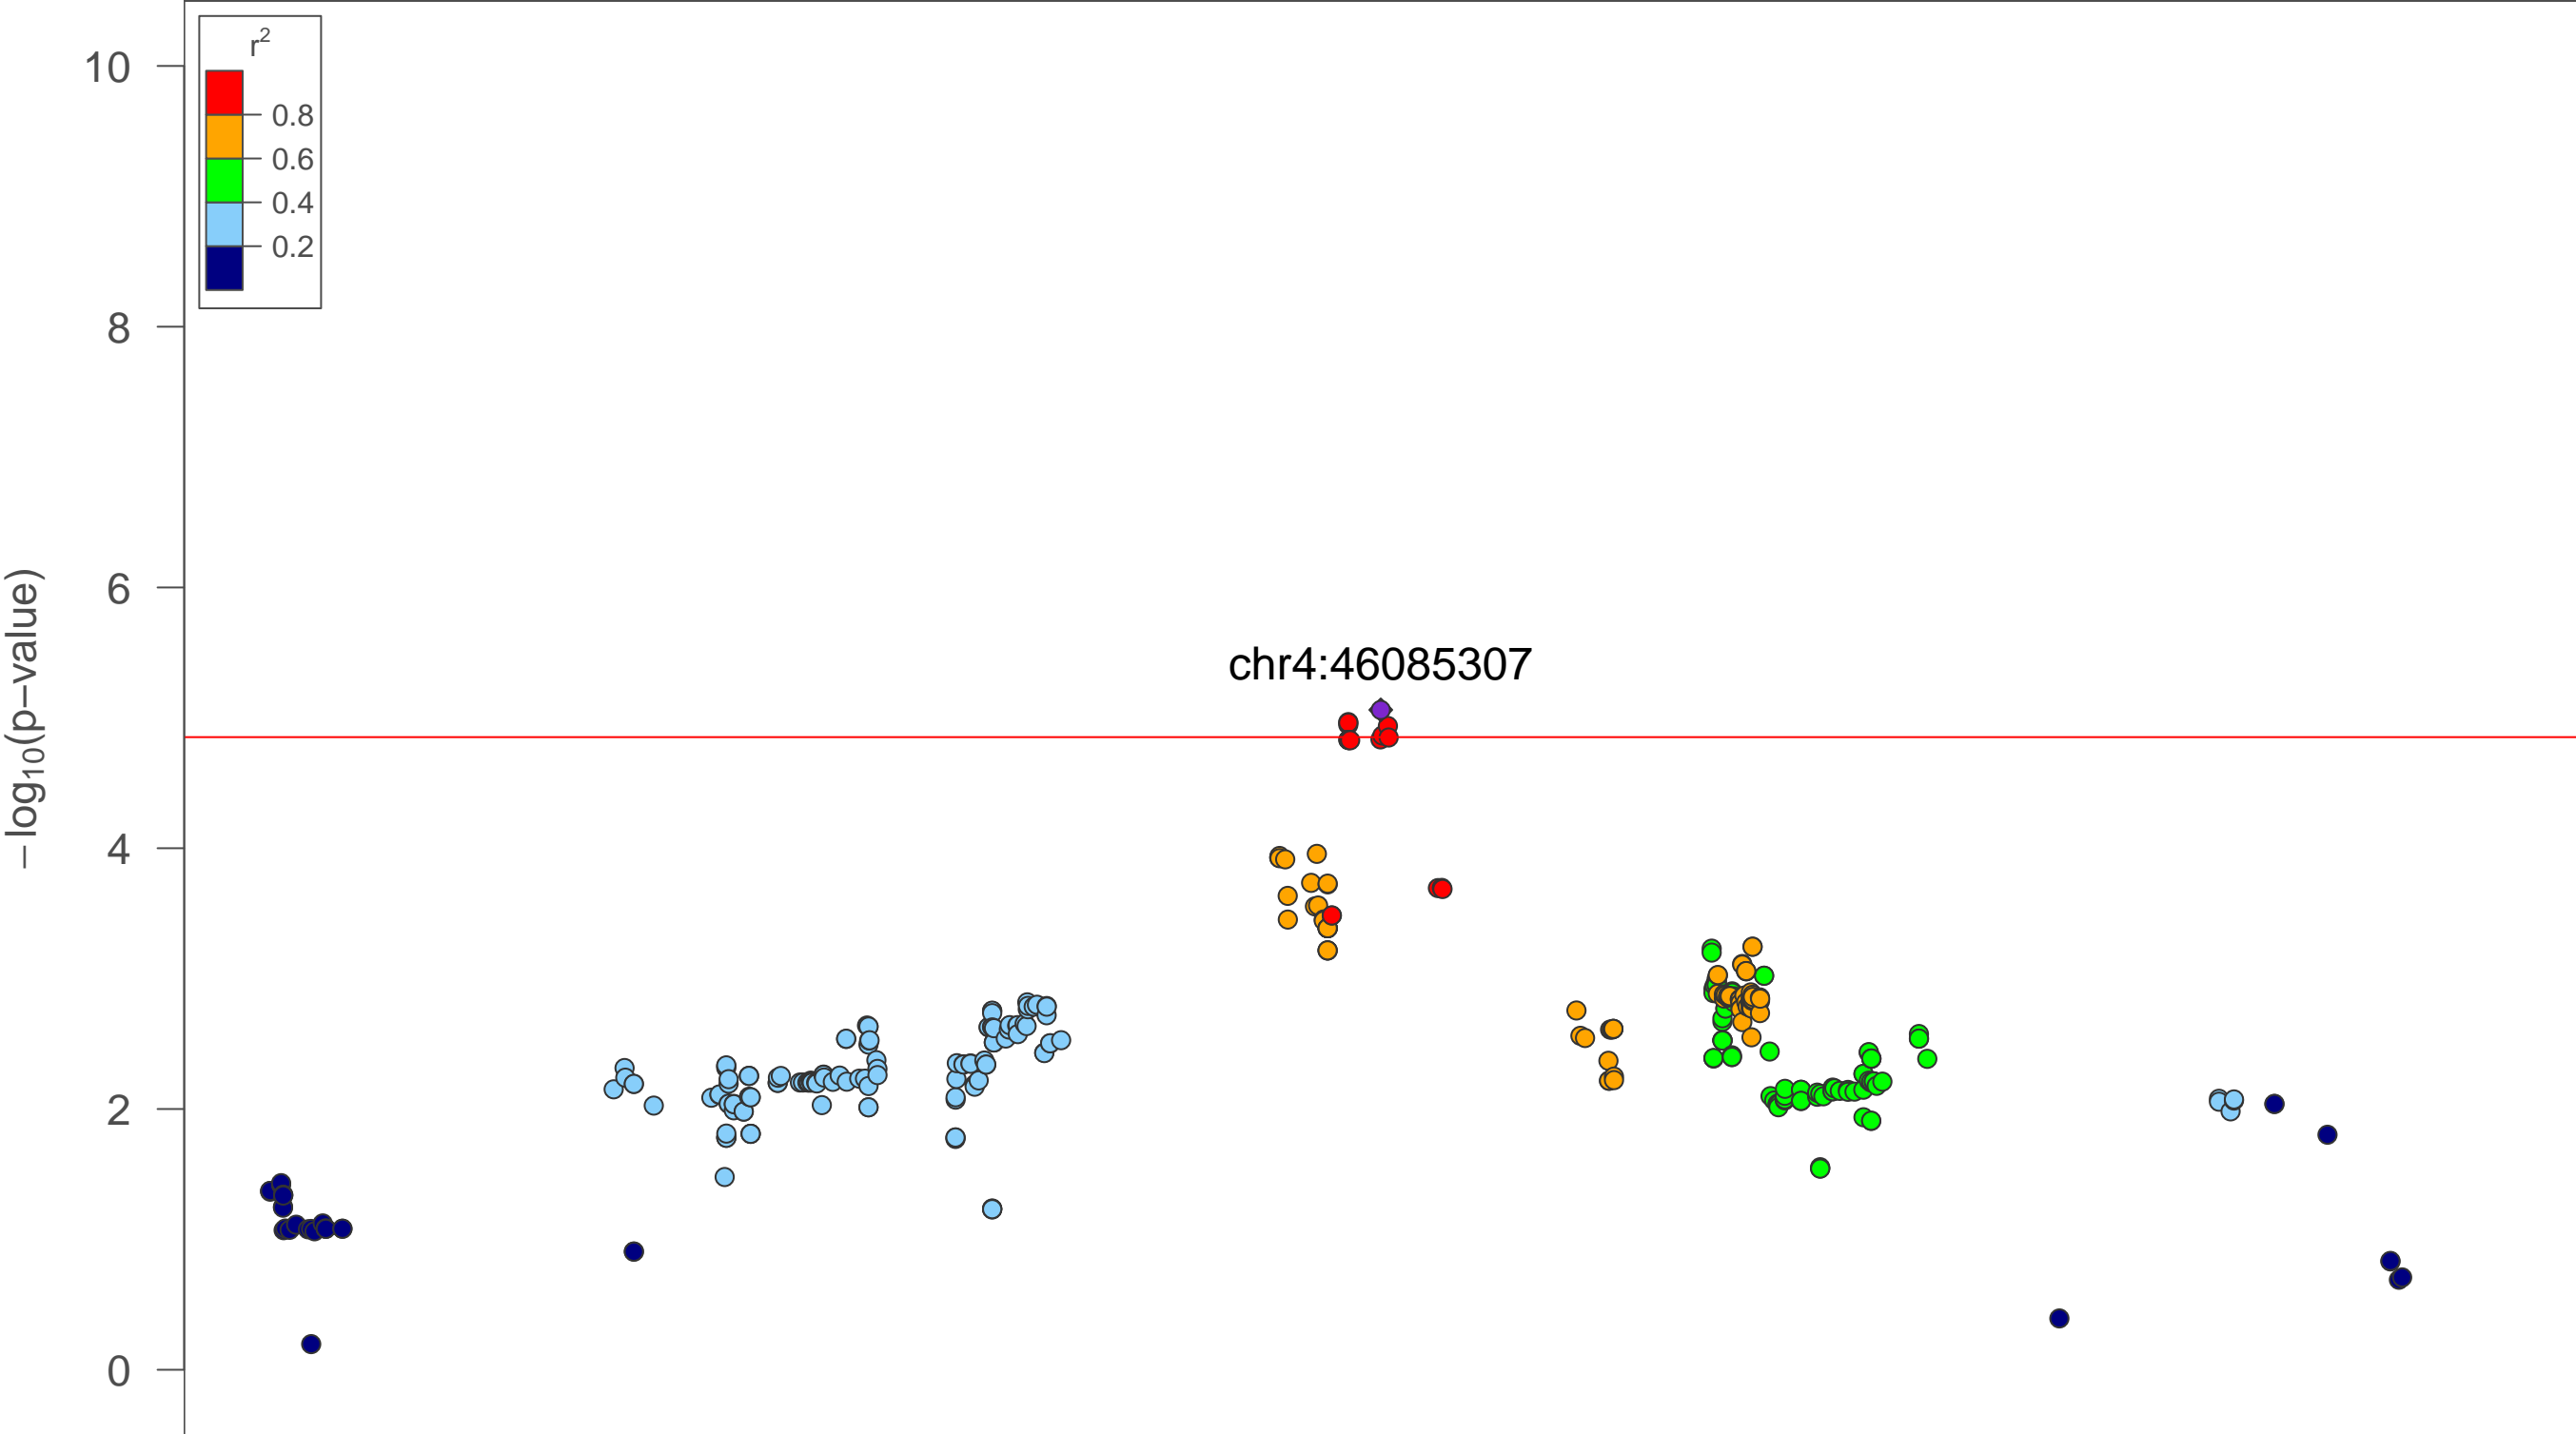

Credible Set

← *Aqp3* *Gm3893* → *Phf24* → ← *Tln1* *Melk* → *Grhpr* → *Gm829* → ← *Trmo* ← *Anks6* *Nr4a3* → *Plppr1* →  
← *Nol6* *Gm13304* → *Dnajb5* → *Npr2* → ← *Pax5* ← *Exosc3* *Tmod1* → ← *Gabbr2* *Stx17* → ← *Acnat2*  
*Ube2r2* → *Ccl21b* → ← *Vcp* ← *Gba2* ← *Mir5120* ← *Shb* ← *Tstd2* *Galnt12* → ← *Erp44* ← *Acnat1*  
← *Ubap2* *Gm13308* → *Unc13b* → *Reck* → *Zcchc7* → ← *Gm12409* ← *Tbc1d2* *Tgfbr1* → ← *Mir1958* ← *Baat*

109 genes  
omitted

date: Thu Oct 25 17:07:57 2018

build: F34GBS

display range: chr4:41085307–51085307 [41085307–51085307]

hilite range: 0 – 0 [ 0 – 0 ]

reference SNP: chr4:46085307

number of SNPs plotted: 346

min P-value: 8.69E–6 [chr4:46085307]

max P-value: 6.35E–1 [chr4:41616530]

omitted Genes: Dcaf12, Ubap1, Kif24

omitted Genes: Nudt2, AI464131, 1110017D15Rik

omitted Genes: Fam219aos, Fam219a, Dnaic1

omitted Genes: Enho, Cntfr, Rpp25l

omitted Genes: Dctn3, Arid3c, Sigmar1

omitted Genes: Galt, Il11ra1, Ccl27a

omitted Genes: Gm21541, Gm20878, Gm13306

omitted Genes: Gm13305, Gm21586, Fam205a2

omitted Genes: Gm10591, Ccl27b, Il11ra2

omitted Genes: Ccl19, Ccl21a, Fam205a1

omitted Genes: Fam205c, 1700022I11Rik, Fancg

omitted Genes: Pigo, Stoml2, Fam214b

omitted Genes: Atp8b5, Rusc2, Fam166b

omitted Genes: Tesk1, Cd72, Sit1

omitted Genes: Rmrp, Ccdc107, Arhgef39

omitted Genes: Car9, Tpm2, Creb3

omitted Genes: Rgp1, Msmp, Spag8

omitted Genes: Hint2, Fam221b, Tmem8b

omitted Genes: Olfr70, Olfr71, Hrct1

omitted Genes: 5430416O09Rik, A630077J23Rik, Olfr159

omitted Genes: Olfr29-ps1, Olfr156, Olfr157

omitted Genes: Olfr155, Glipr2, Ccin

omitted Genes: Clta, Gne, Gm12504

omitted Genes: Rnf38, Mir5106, 5730488B01Rik

omitted Genes: Zbtb5, Polr1e, Fbxo10

omitted Genes: Tomm5, Frmpd1, Frmpd1os

omitted Genes: Trmt10b, Dcaf10, Slc25a51

omitted Genes: Aldh1b1, Igfbp1, Stra6l

omitted Genes: Ccdc180, Tdrd7, Ncbp1

omitted Genes: Xpa, Foxe1, Hemgn

omitted Genes: Anp32b, Nans, Trim14, Trim14

omitted Genes: Coro2a, Ccl15a1, Alq2

Make more plots at <http://csg.sph.umich.edu/locuszoom/>

Fine-mapping Regions

| snp           | chr | pos (Mb) | pp          | group        | color  |
|---------------|-----|----------|-------------|--------------|--------|
| chr4:45949623 | 4   | 45.94962 | 0.089762626 | Credible Set | purple |
| chr4:45949656 | 4   | 45.94966 | 0.093939720 | Credible Set | purple |
| chr4:45949665 | 4   | 45.94967 | 0.092953049 | Credible Set | purple |
| chr4:45950119 | 4   | 45.95012 | 0.069606476 | Credible Set | purple |
| chr4:45950209 | 4   | 45.95021 | 0.069509485 | Credible Set | purple |
| chr4:45951631 | 4   | 45.95163 | 0.069346826 | Credible Set | purple |
| chr4:45957405 | 4   | 45.95741 | 0.069129650 | Credible Set | purple |
| chr4:46084049 | 4   | 46.08405 | 0.070167667 | Credible Set | purple |
| chr4:46085307 | 4   | 46.08531 | 0.115350828 | Credible Set | purple |
| chr4:46091992 | 4   | 46.09199 | 0.074918273 | Credible Set | purple |
| chr4:46115063 | 4   | 46.11506 | 0.087995678 | Credible Set | purple |
| chr4:46118124 | 4   | 46.11812 | 0.072463060 | Credible Set | purple |
| chr4:46324082 | 4   | 46.32408 | 0.005837550 | Credible Set | purple |
| chr4:46340473 | 4   | 46.34047 | 0.005854421 | Credible Set | purple |
| chr4:46343171 | 4   | 46.34317 | 0.005746680 | Credible Set | purple |

F34 GBS, retic parameters hemoglobin distribution width

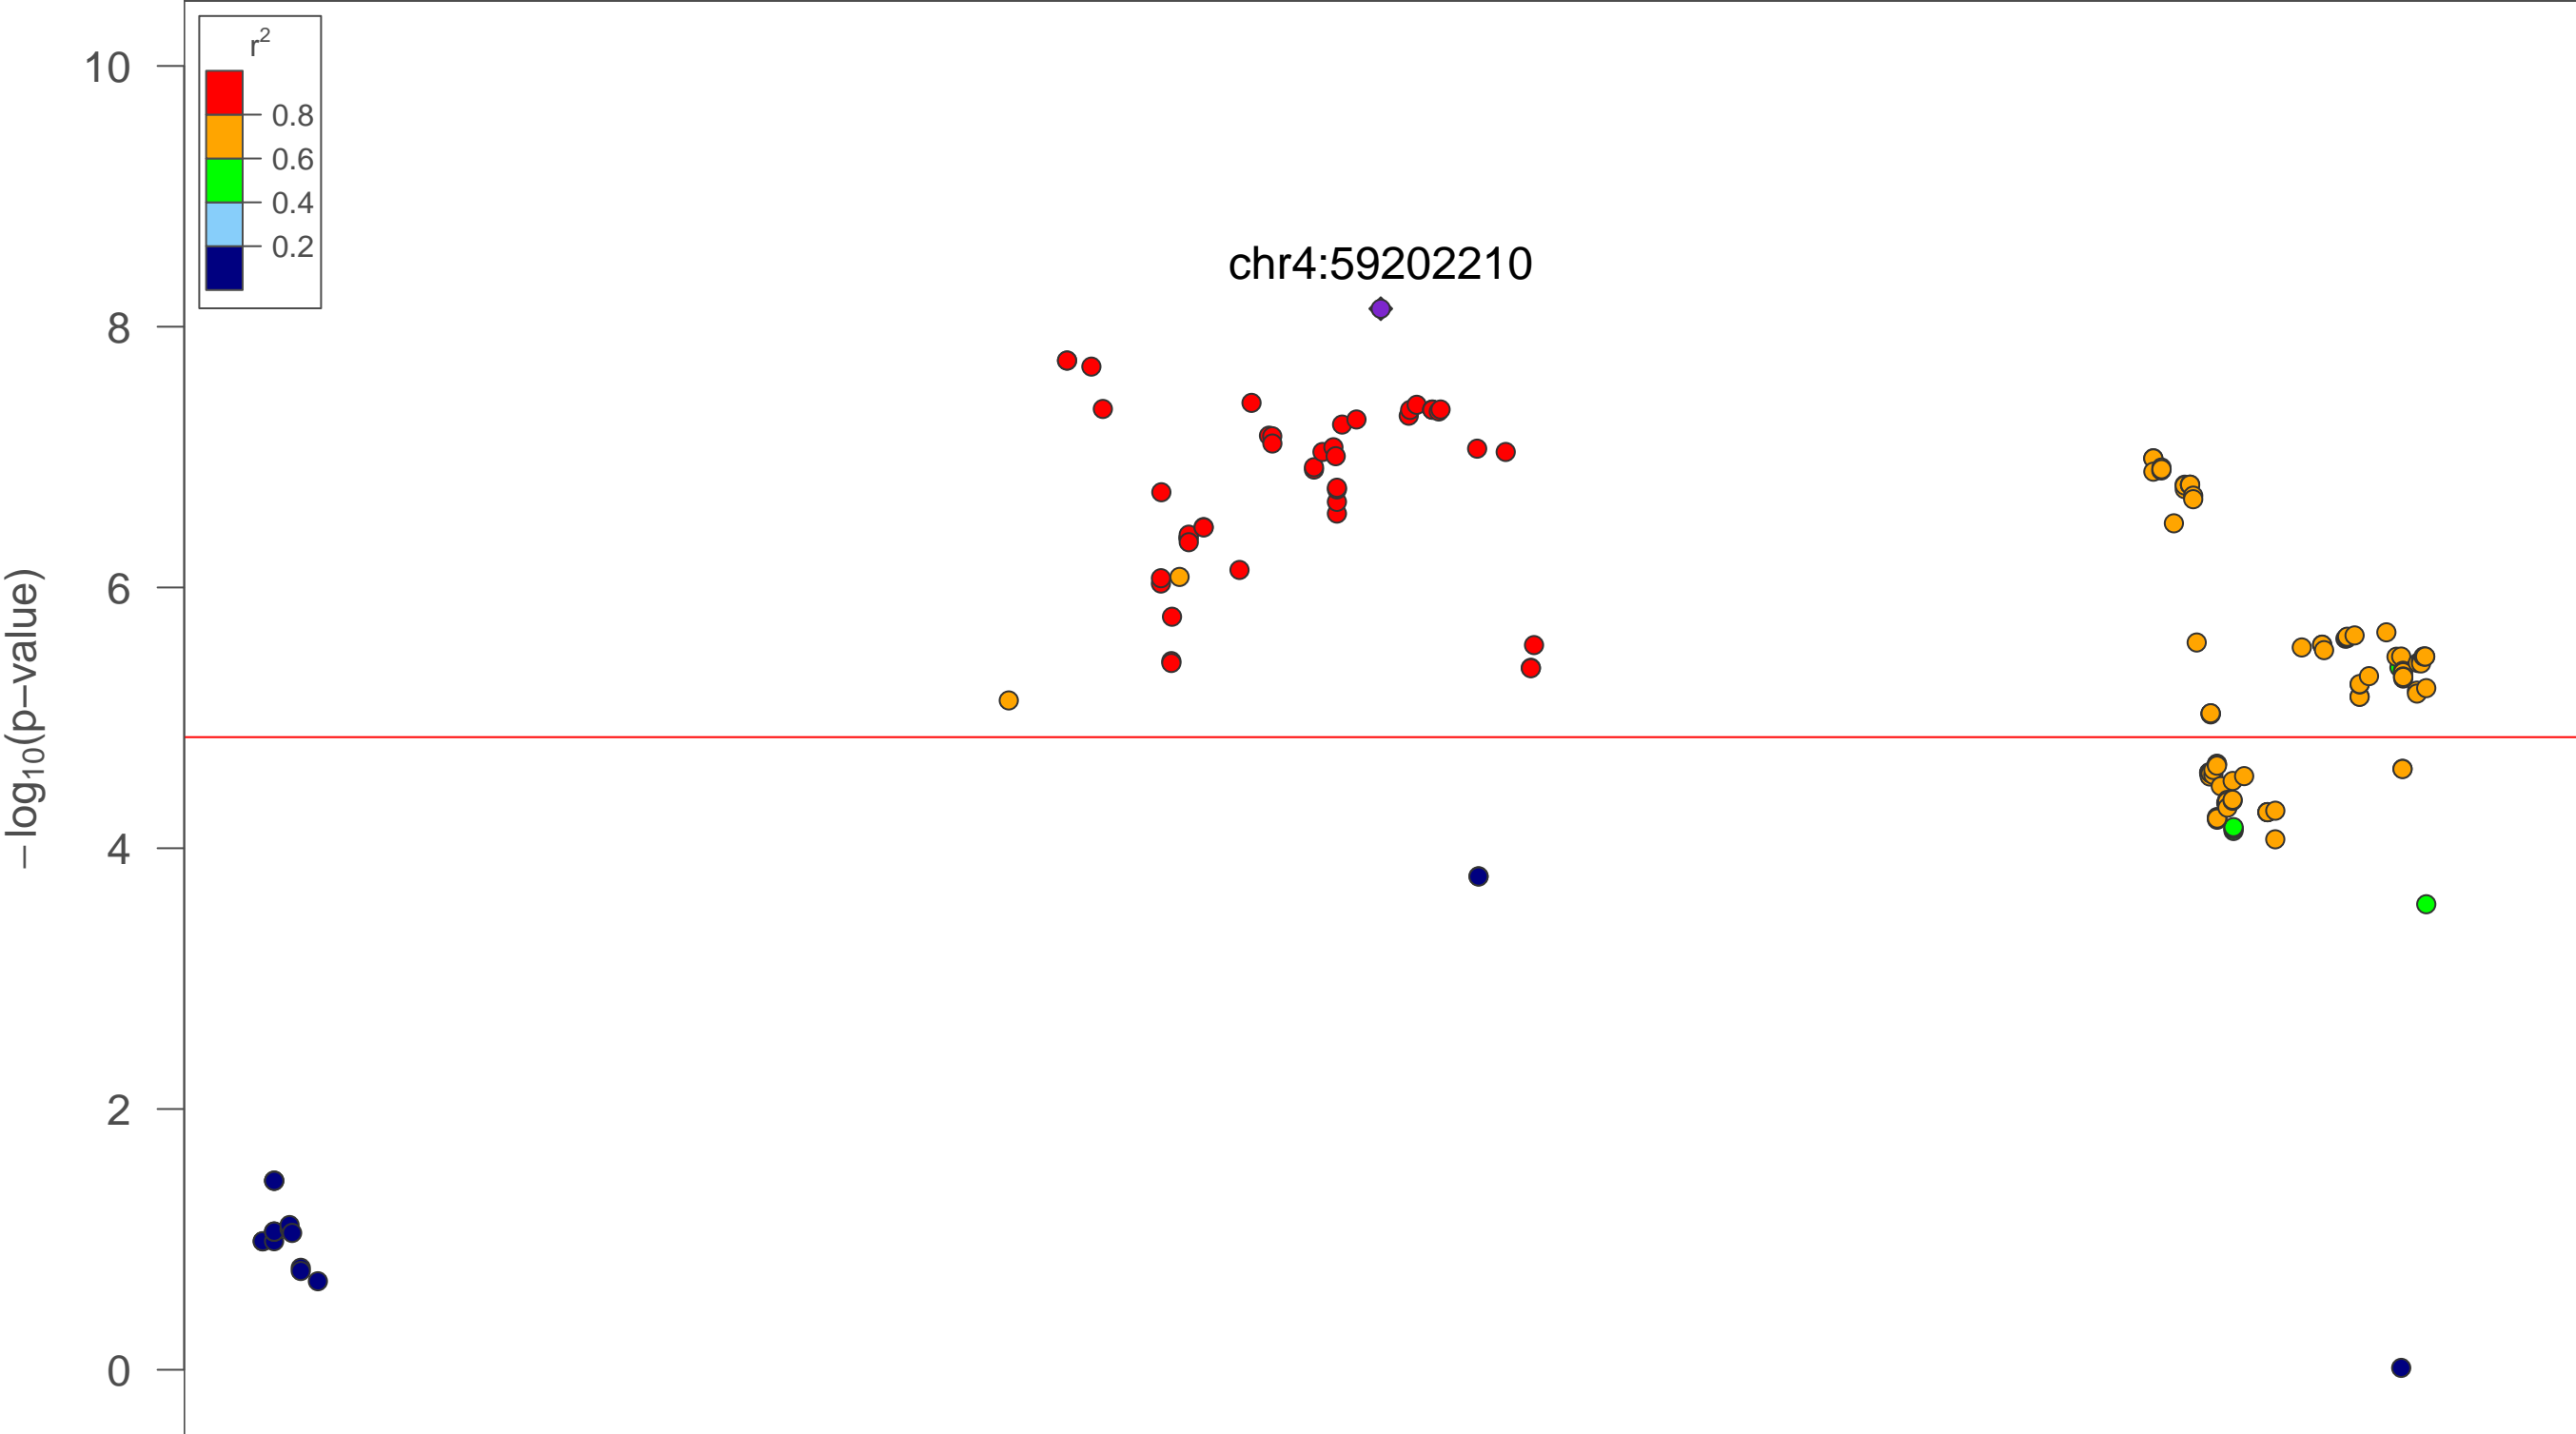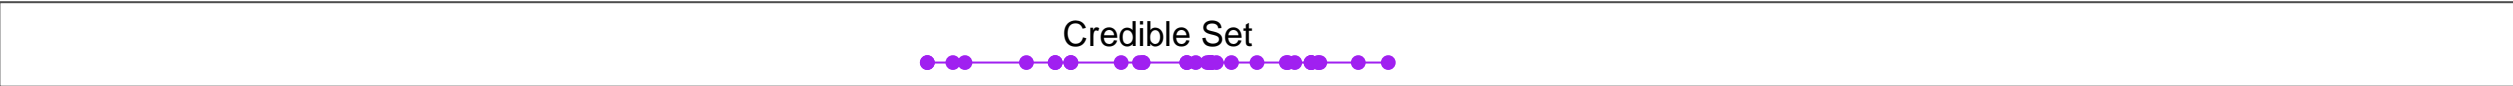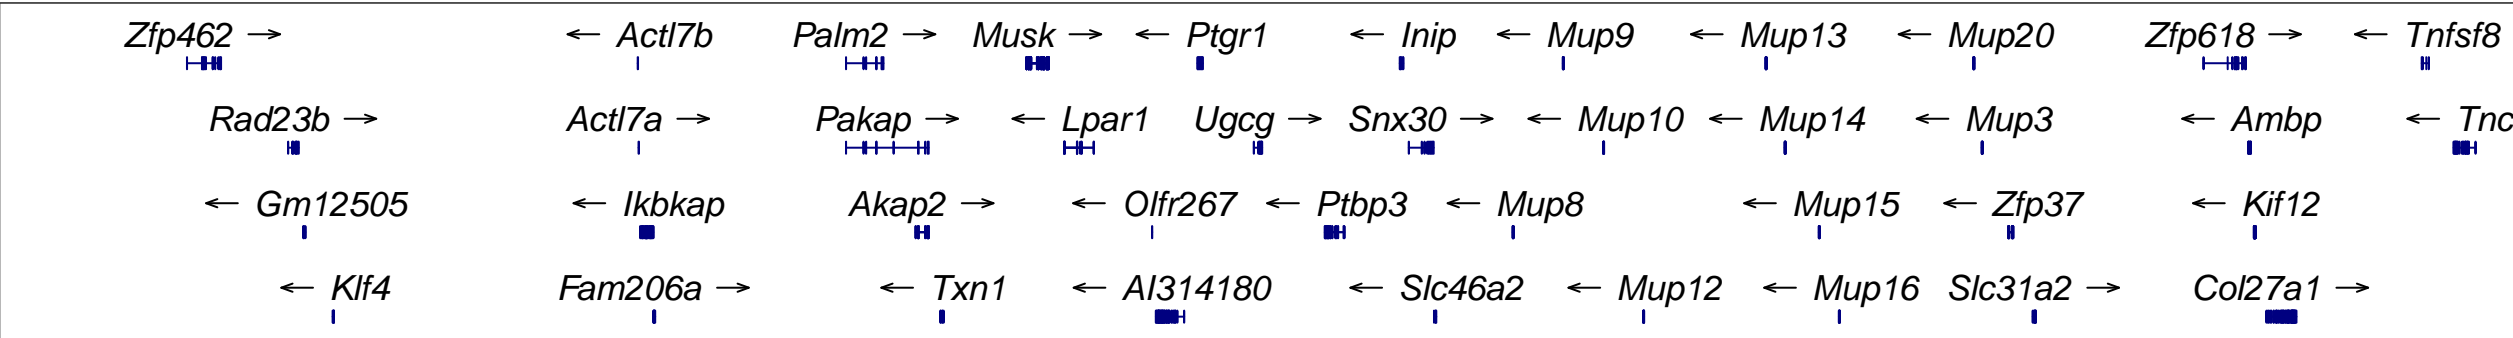

53 genes  
omitted

date: Thu Oct 25 17:08:05 2018  
build: F34GBS  
display range: chr4:54202210–64202210 [54202210–64202210]  
hilite range: 0 – 0 [ 0 – 0 ]  
reference SNP: chr4:59202210  
number of SNPs plotted: 157  
min P-value: 7.28E–9 [chr4:59202210]  
max P-value: 9.66E–1 [chr4:63465549]  
omitted Genes: Ctnna1, Tmem245, Mir32  
omitted Genes: Frs1l, Ebp41l4b, Gm12530  
omitted Genes: Ptpn3, 1700042G15Rik, D630039A03Rik  
omitted Genes: Txndc8, Slep1, Mir3095  
omitted Genes: Zkscan16, Dnajc25, Gng10  
omitted Genes: Gm12596, Susd1, Hsd12  
omitted Genes: E130308A19Rik, Mup4, Mup6  
omitted Genes: Mup7, Mup2, Mup1  
omitted Genes: Mup11, Mup17, Mup18  
omitted Genes: Mup19, Mup5, Mup21  
omitted Genes: Fkbp15, Slc31a1, Cdc26  
omitted Genes: Prpf4, Rnf183, Wdr31  
omitted Genes: Bspr, Hdhd3, Alad  
omitted Genes: Pole3, 4933430I17Rik, Rgs3  
omitted Genes: Mir455, Orm1, Orm3  
omitted Genes: Orm2, Akna, Whrn  
omitted Genes: Atp6v1g1, 6330416G13Rik, Gm11213  
omitted Genes: 1700018C11Rik, Tnfsf15

## Fine-mapping Regions

| snp           | chr | pos (Mb) | pp          | group        | color  |
|---------------|-----|----------|-------------|--------------|--------|
| chr4:57891427 | 4   | 57.89143 | 0.074789361 | Credible Set | purple |
| chr4:57891451 | 4   | 57.89145 | 0.074789361 | Credible Set | purple |
| chr4:57993173 | 4   | 57.99317 | 0.067416927 | Credible Set | purple |
| chr4:58041091 | 4   | 58.04109 | 0.032637673 | Credible Set | purple |
| chr4:58285477 | 4   | 58.28548 | 0.007854700 | Credible Set | purple |
| chr4:58399947 | 4   | 58.39995 | 0.003810993 | Credible Set | purple |
| chr4:58400011 | 4   | 58.40001 | 0.003350692 | Credible Set | purple |
| chr4:58461854 | 4   | 58.46185 | 0.004337250 | Credible Set | purple |
| chr4:58462401 | 4   | 58.46240 | 0.004311110 | Credible Set | purple |
| chr4:58662154 | 4   | 58.66215 | 0.036220962 | Credible Set | purple |
| chr4:58735042 | 4   | 58.73504 | 0.020669850 | Credible Set | purple |
| chr4:58748774 | 4   | 58.74877 | 0.020454574 | Credible Set | purple |
| chr4:58749245 | 4   | 58.74925 | 0.018065857 | Credible Set | purple |
| chr4:58923167 | 4   | 58.92317 | 0.011568694 | Credible Set | purple |
| chr4:58923190 | 4   | 58.92319 | 0.012046201 | Credible Set | purple |
| chr4:58958681 | 4   | 58.95868 | 0.015628801 | Credible Set | purple |
| chr4:59004314 | 4   | 59.00431 | 0.016952064 | Credible Set | purple |
| chr4:59013917 | 4   | 59.01392 | 0.014537933 | Credible Set | purple |
| chr4:59019003 | 4   | 59.01900 | 0.005457270 | Credible Set | purple |
| chr4:59019032 | 4   | 59.01903 | 0.006668589 | Credible Set | purple |
| chr4:59019072 | 4   | 59.01907 | 0.008243187 | Credible Set | purple |
| chr4:59019113 | 4   | 59.01911 | 0.008487489 | Credible Set | purple |
| chr4:59040591 | 4   | 59.04059 | 0.024982138 | Credible Set | purple |
| chr4:59100640 | 4   | 59.10064 | 0.027250456 | Credible Set | purple |
| chr4:59202210 | 4   | 59.20221 | 0.181971130 | Credible Set | purple |
| chr4:59319020 | 4   | 59.31902 | 0.029047920 | Credible Set | purple |
| chr4:59324851 | 4   | 59.32485 | 0.032108606 | Credible Set | purple |
| chr4:59352342 | 4   | 59.35234 | 0.035044679 | Credible Set | purple |
| chr4:59417447 | 4   | 59.41745 | 0.032336464 | Credible Set | purple |
| chr4:59417451 | 4   | 59.41745 | 0.032254525 | Credible Set | purple |
| chr4:59417505 | 4   | 59.41750 | 0.032172049 | Credible Set | purple |
| chr4:59444538 | 4   | 59.44454 | 0.031259187 | Credible Set | purple |
| chr4:59451945 | 4   | 59.45195 | 0.032339242 | Credible Set | purple |
| chr4:59604913 | 4   | 59.60491 | 0.016542001 | Credible Set | purple |
| chr4:59724135 | 4   | 59.72413 | 0.015635485 | Credible Set | purple |

F34 GBS, retic parameters hemoglobin distribution width

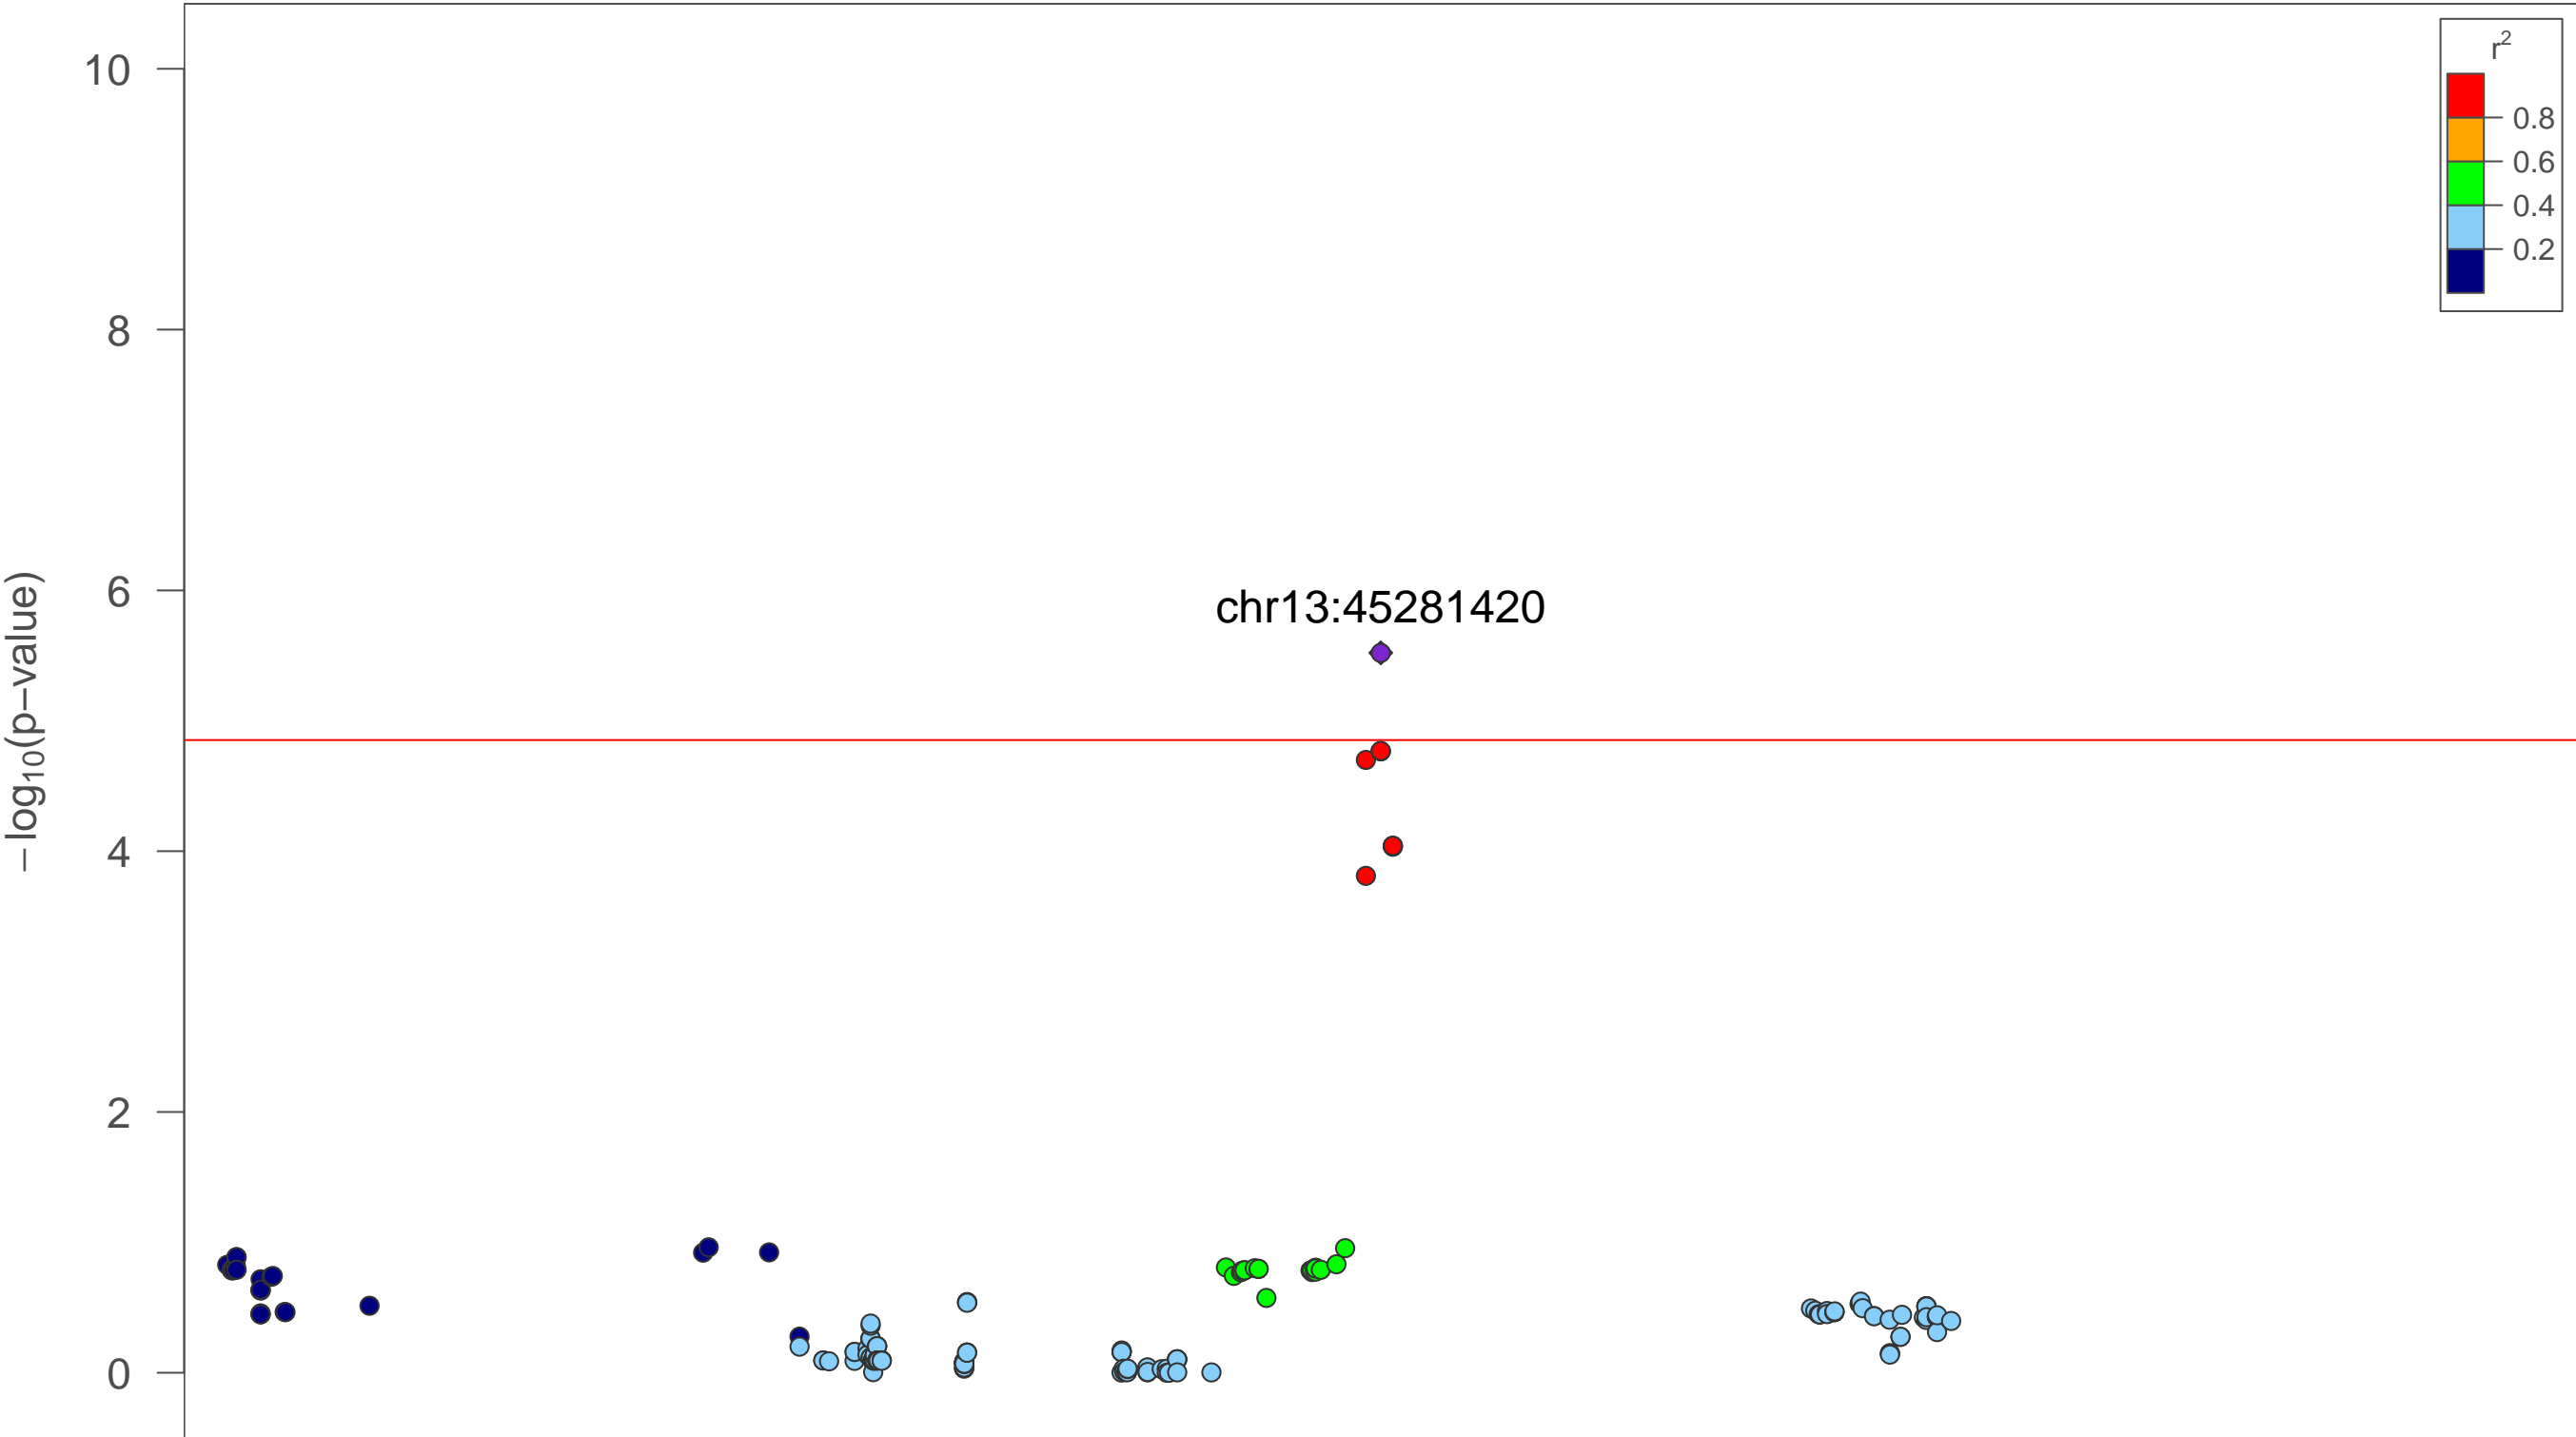

Credible Set

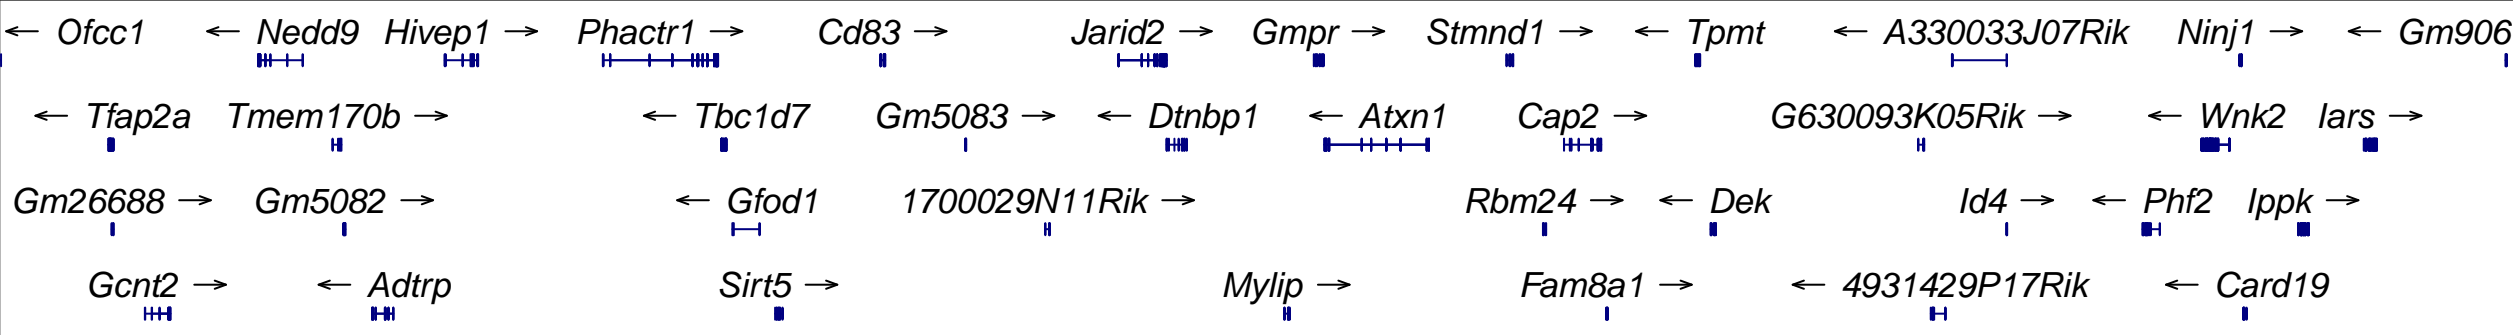

41 genes  
omitted

Position on chr13 (Mb)

date: Thu Oct 25 17:07:47 2018  
build: F34GBS  
display range: chr13:40281420–50281420 [40281420–50281420]  
hilite range: 0 – 0 [ 0 – 0 ]  
reference SNP: chr13:45281420  
number of SNPs plotted: 173  
min P-value: 3.01E–6 [chr13:45281420]  
max P-value: 10E–1 [chr13:44396308]  
omitted Genes: Mir5124a, Pak1ip1, Tmem14c  
omitted Genes: Mak, Gcm2, Sycp2l  
omitted Genes: Elovl2, Smim13, Gm10790  
omitted Genes: Edn1, Nol7, Ranbp9  
omitted Genes: Mcur1, Rnf182, Gm20751  
omitted Genes: A330076C08Rik, Nup153, Kif13a  
omitted Genes: Nhlrc1, Kdm1b, Rnf144b  
omitted Genes: A930002C04Rik, A330048O09Rik, Zfp169  
omitted Genes: Mirlet7d, Mirlet7f–1, Mirlet7a–1  
omitted Genes: Ptpdc1, Barx1, Fam120a  
omitted Genes: Fam120aos, Susd3, Fgd3  
omitted Genes: Bicd2, Cenpp, Ecm2  
omitted Genes: Aspn, Omd, Ogn  
omitted Genes: Nol8, 2310081J21Rik



Fine-mapping Regions

| snp            | chr | pos (Mb) | pp         | group        | color  |
|----------------|-----|----------|------------|--------------|--------|
| chr13:45219307 | 13  | 45.21931 | 0.01259701 | Credible Set | purple |
| chr13:45219356 | 13  | 45.21936 | 0.08755971 | Credible Set | purple |
| chr13:45281289 | 13  | 45.28129 | 0.10158012 | Credible Set | purple |
| chr13:45281291 | 13  | 45.28129 | 0.10114708 | Credible Set | purple |
| chr13:45281309 | 13  | 45.28131 | 0.10177082 | Credible Set | purple |
| chr13:45281420 | 13  | 45.28142 | 0.53331775 | Credible Set | purple |
| chr13:45331781 | 13  | 45.33178 | 0.02081501 | Credible Set | purple |
| chr13:45331853 | 13  | 45.33185 | 0.02045599 | Credible Set | purple |
| chr13:45331868 | 13  | 45.33187 | 0.02075652 | Credible Set | purple |

# F34 GBS, retic parameters mean reticulocyte volume, repeat

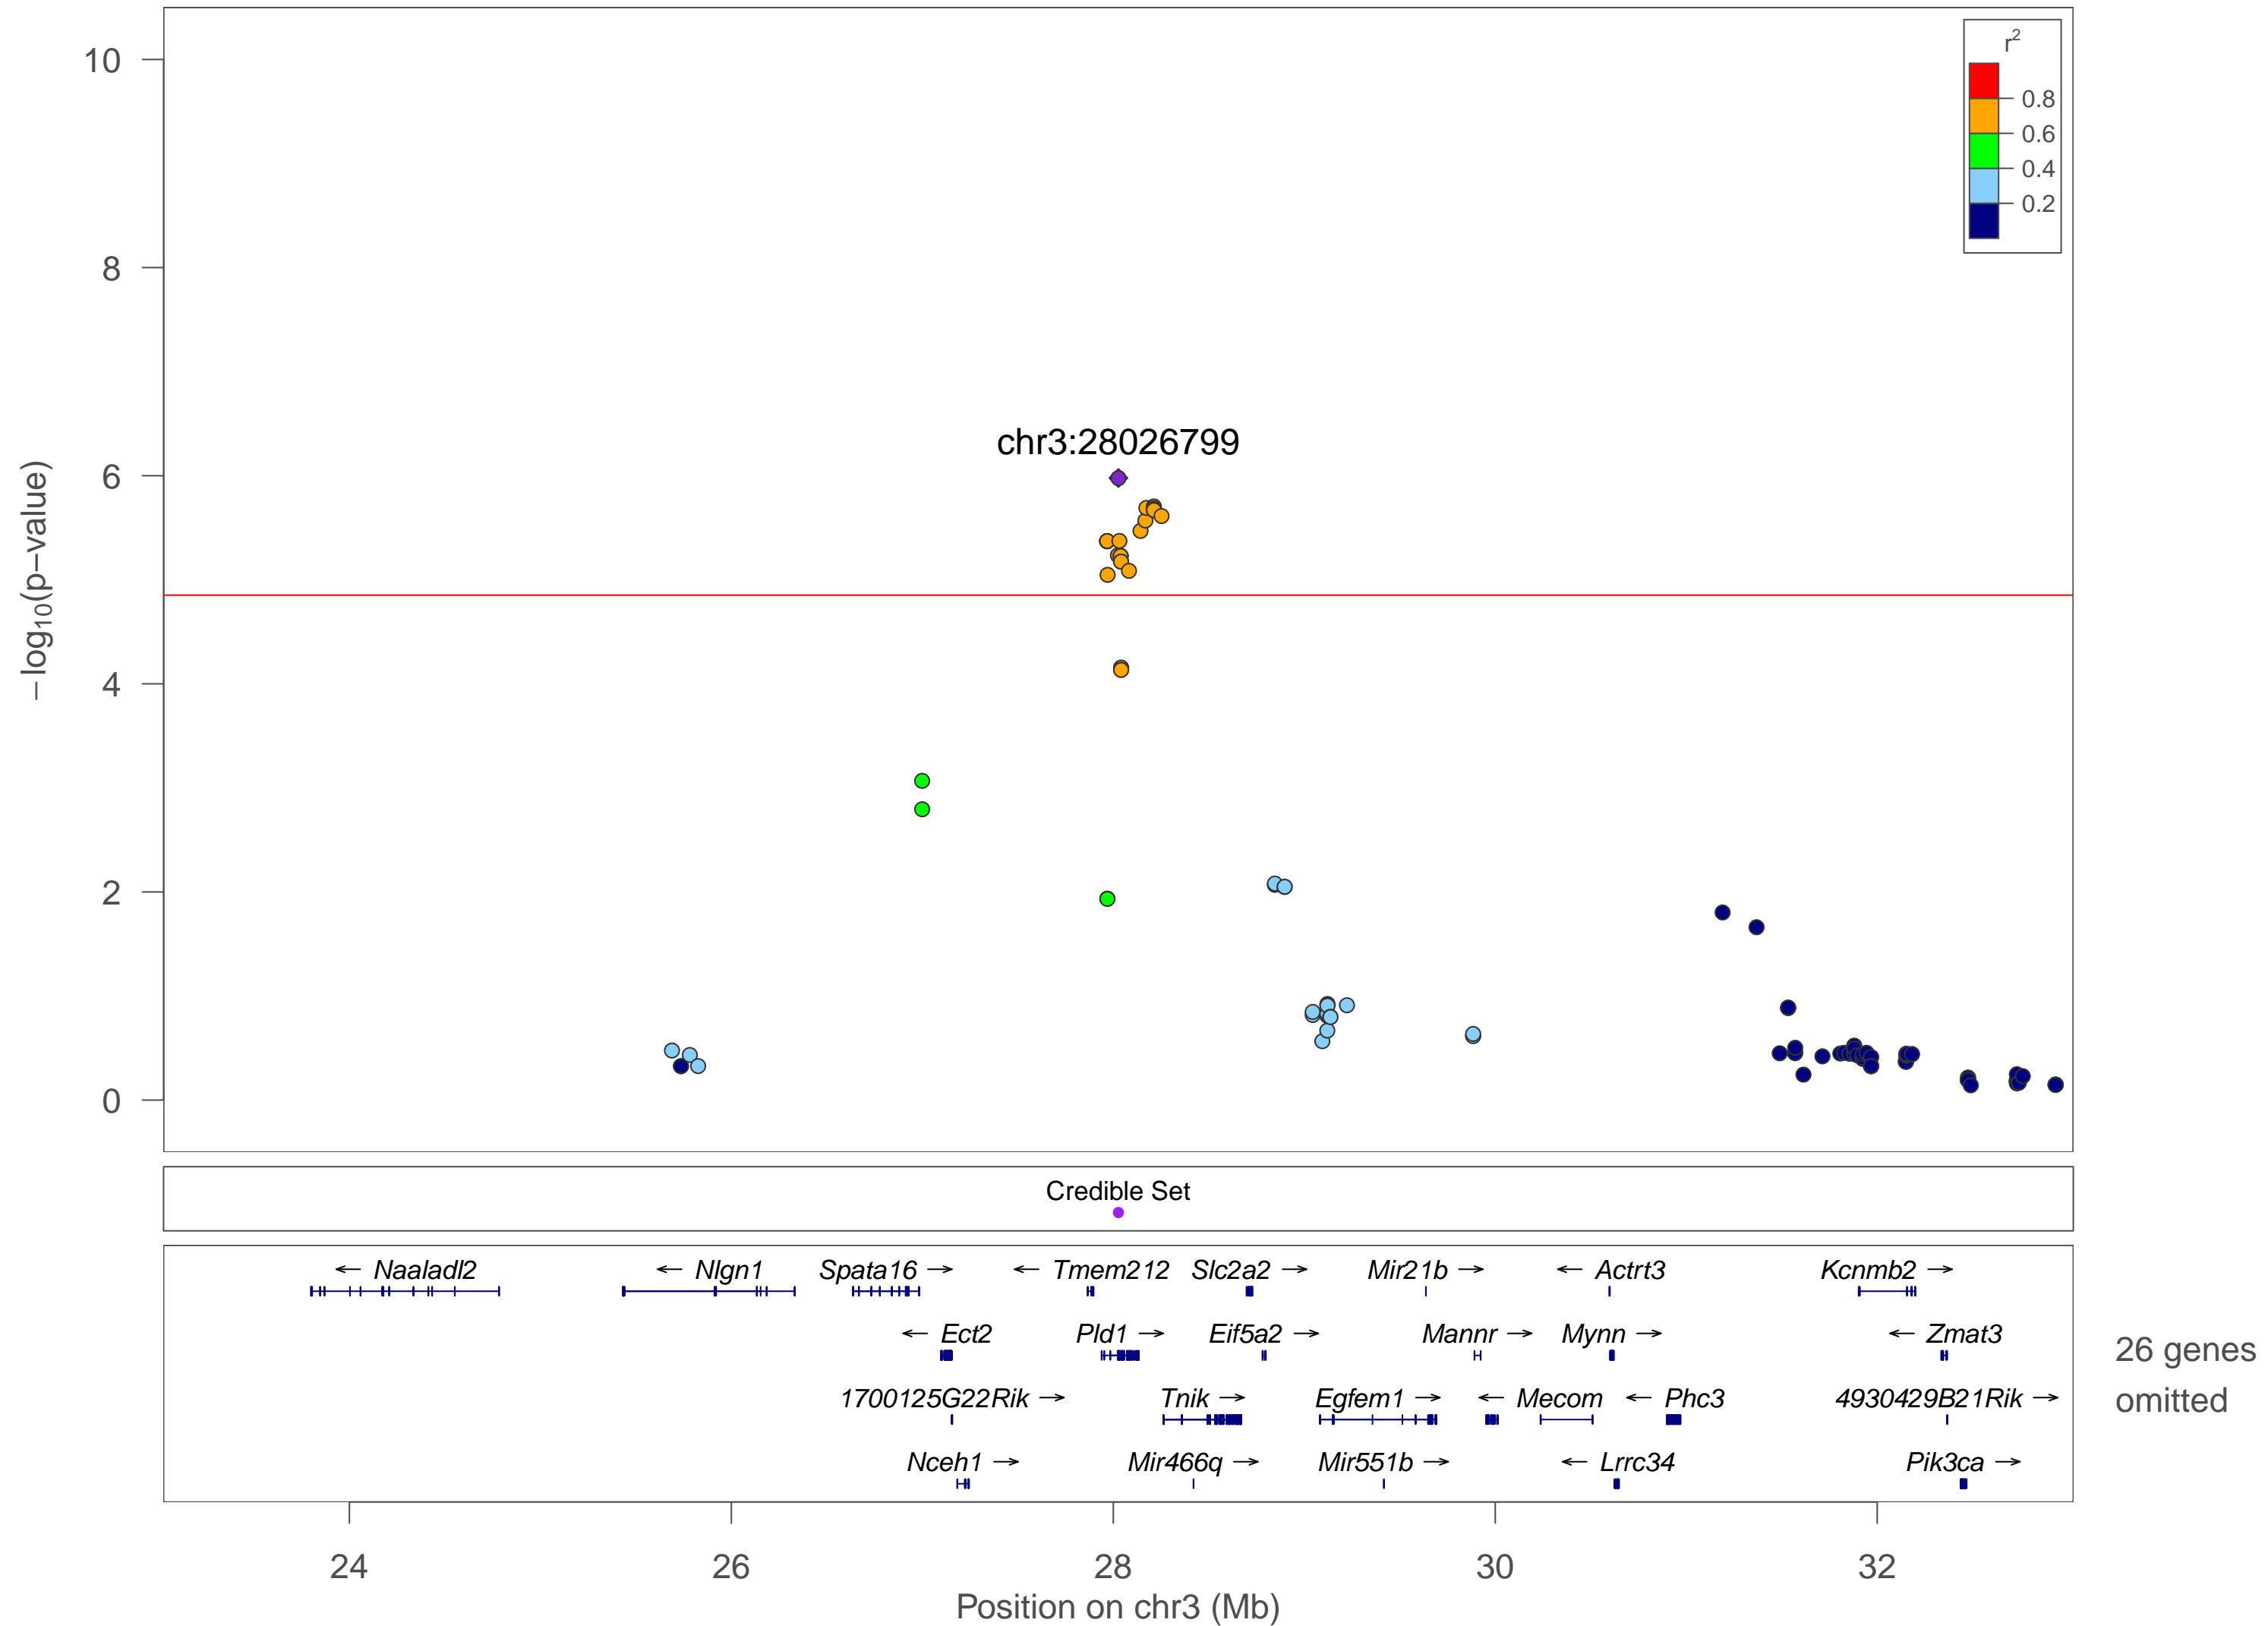

date: Thu Oct 25 17:08:37 2018

build: F34GBS

display range: chr3:23026799–33026799 [23026799–33026799]

hilite range: 0 – 0 [ 0 – 0 ]

reference SNP: chr3:28026799

number of SNPs plotted: 116

min P-value: 1.05E–6 [chr3:28026799]

max P-value: 7.21E–1 [chr3:32490030]

omitted Genes: Tnfsf10, Ghser, Fndc3b

omitted Genes: Mir3092, Rpl22l1, Gm1527

omitted Genes: Lrriq4, Lrrc31, Samd7

omitted Genes: Sec62, Gpr160, Prkci

omitted Genes: Mir7008, Skil, Cldn11

omitted Genes: Slc7a14, Kcnmb3, Zfp639

omitted Genes: Mfn1, Gnb4, Actl6a

omitted Genes: Mrpl47, Ndubf5, Usp13

omitted Genes: Pex5l, 4930419G24Rik

Fine-mapping Regions

| snp           | chr | pos (Mb) | pp | group        | color  |
|---------------|-----|----------|----|--------------|--------|
| chr3:28026799 | 3   | 28.0268  | 1  | Credible Set | purple |

F34 GBS, retic parameters mean reticulocyte volume, repeat

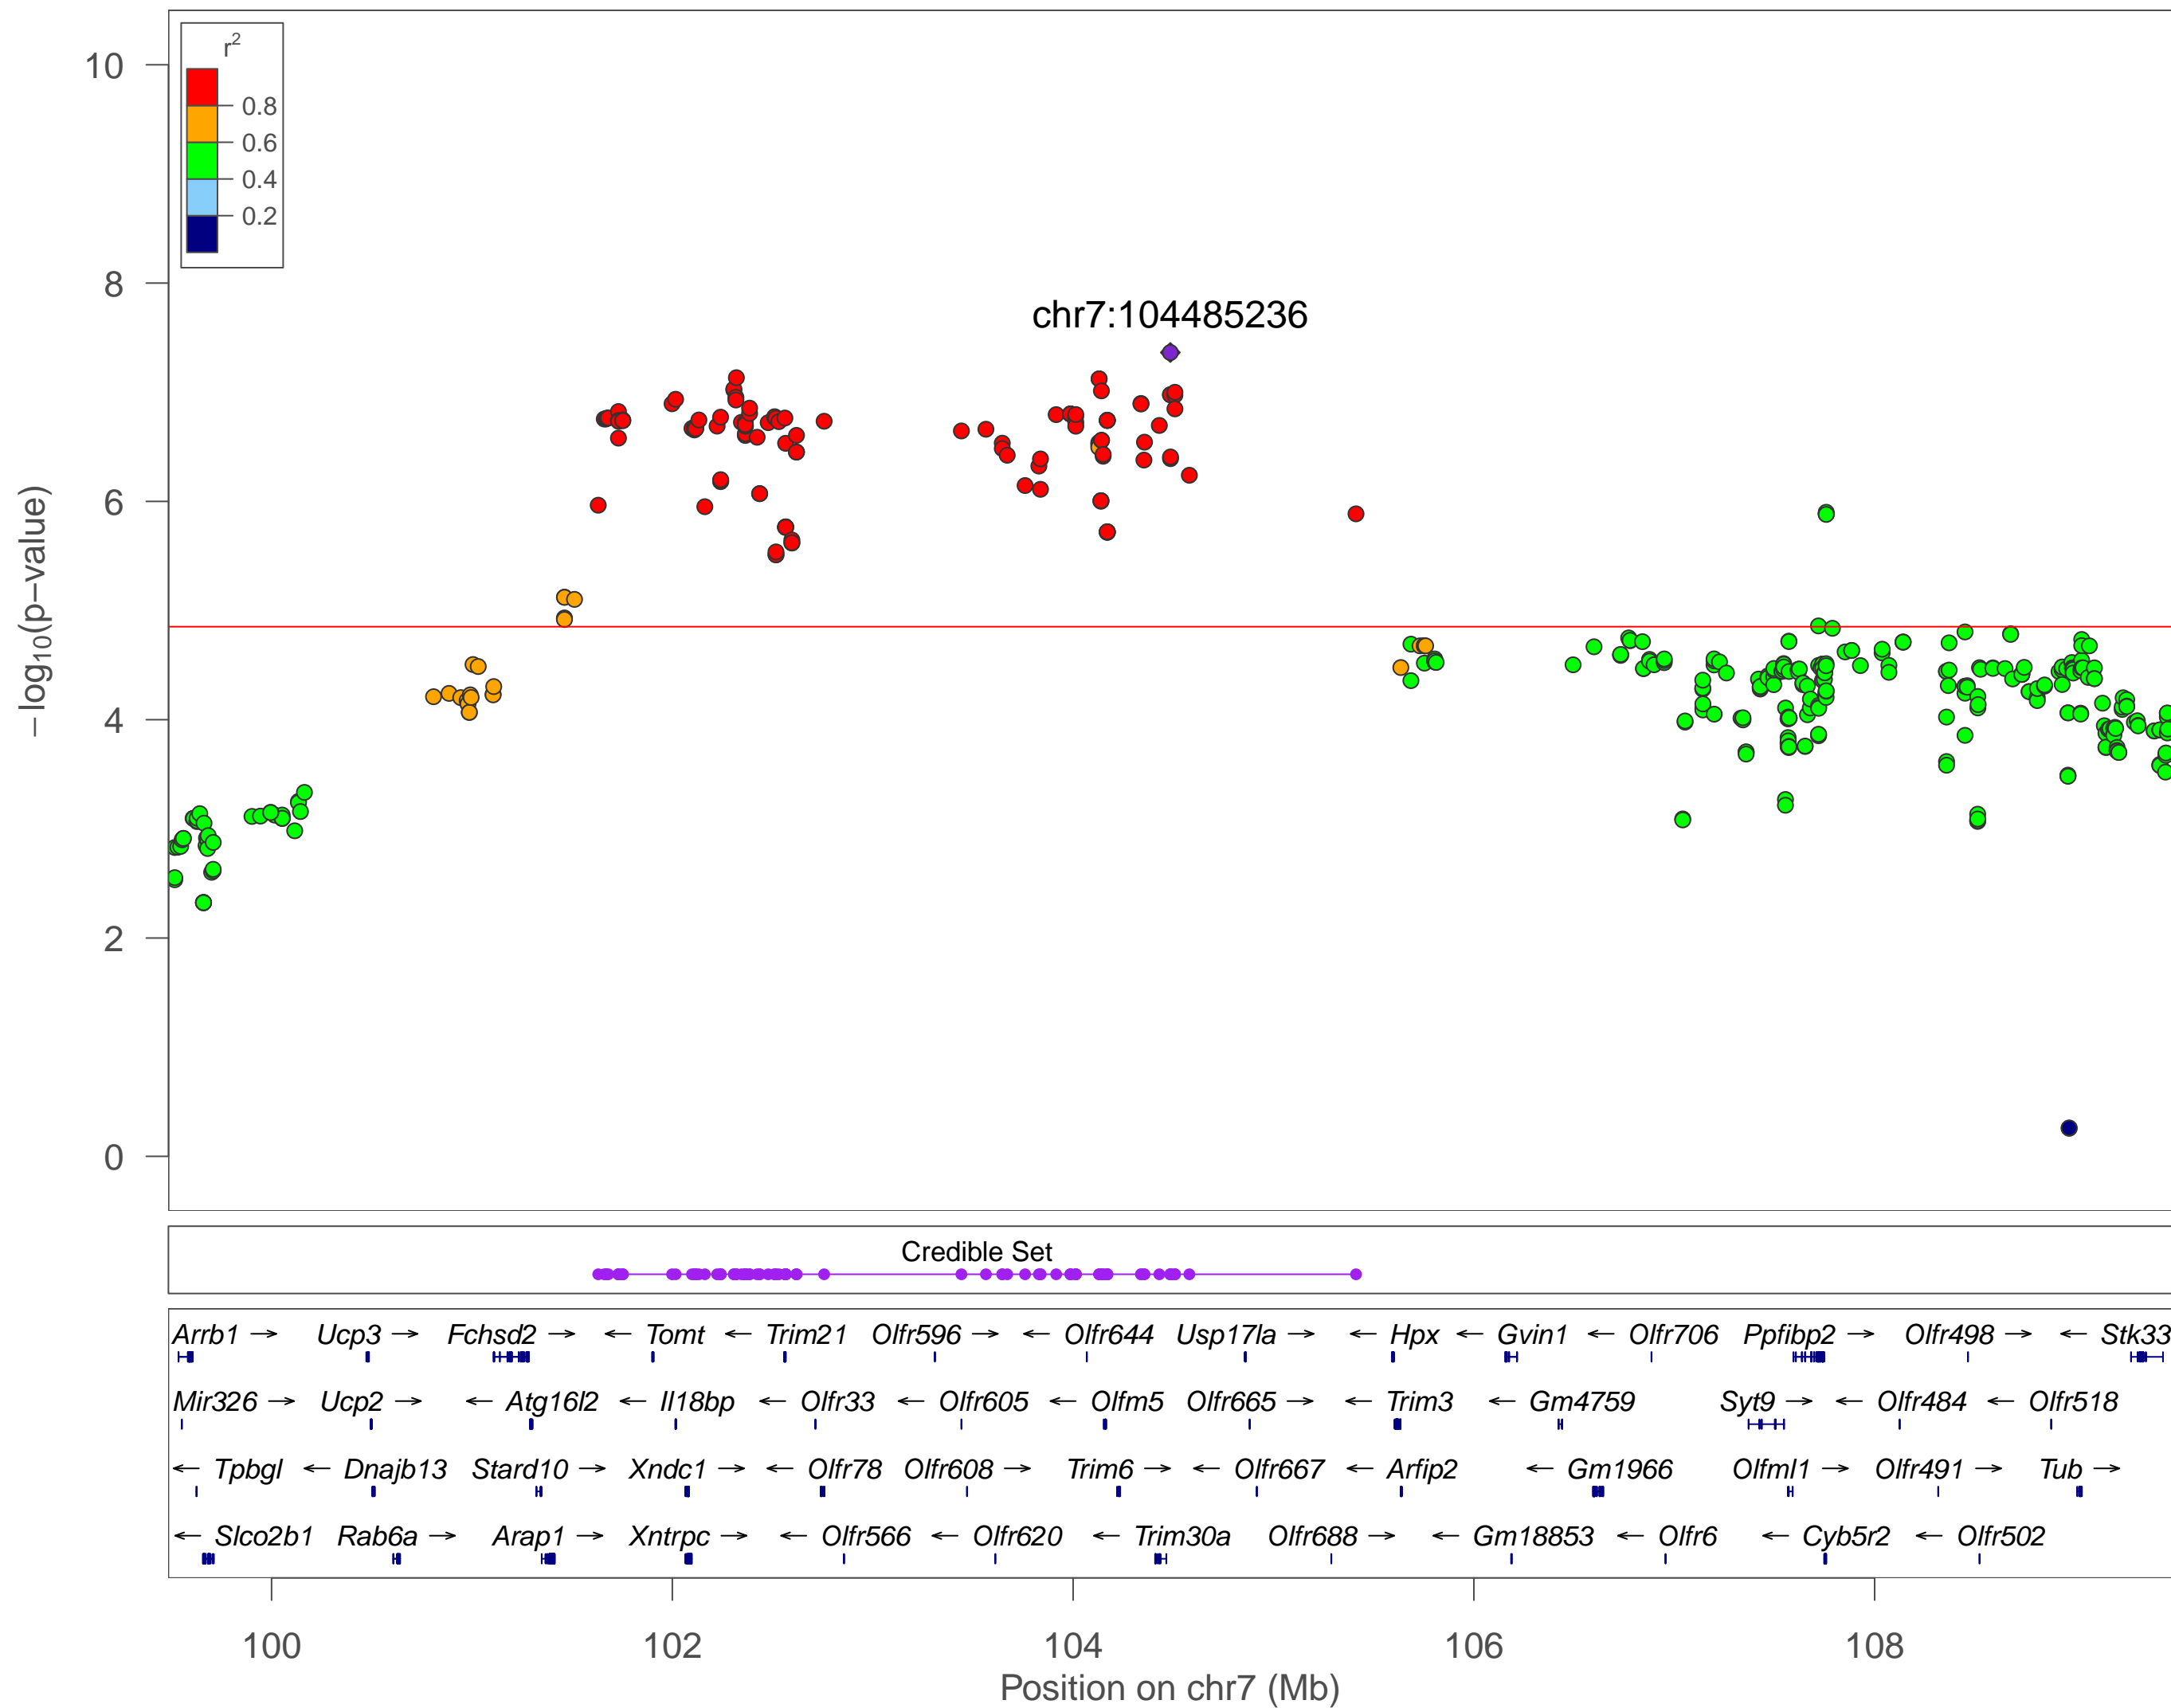

date: Thu Oct 25 17:08:51 2018

build: F34GBS

display range: chr7:99485236–109485236 [99485236–109485236]

hilite range: 0 – 0 [ 0 – 0 ]

reference SNP: chr7:104485236

number of SNPs plotted: 448

min P-value: 4.32E–8 [chr7:104485236]

max P-value: 5.53E–1 [chr7:108970722]

omitted Genes: Olfr520, Olfr521, Neu3

omitted Genes: Spcs2, Xrra1, Rnf169

omitted Genes: Chrdl2, Pold3, Lipt2

omitted Genes: Kcne3, Pgm2l1, Gpx2-ps1

omitted Genes: P4ha3, Ppme1, C2cd3

omitted Genes: Coa4, Mrpl48, Plekhhb1

omitted Genes: Fam168a, Relt, Arhgef17

omitted Genes: Mir3102, P2ry6, P2ry2

omitted Genes: Pde2a, Mir139, Art2a-ps

omitted Genes: Art2b, Clpb, Phox2a

omitted Genes: Inpp1, Folr2, Folr1

omitted Genes: Anapc15, Lamtor1, Lrrc51

omitted Genes: Numa1, Rnf121, Trpc2

omitted Genes: Art5, Art1, Chrna10

omitted Genes: Nup98, Pgap2, Rhog

omitted Genes: Stim1, Rrm1, Olfr543

omitted Genes: Olfr544, Olfr545, Olfr547

omitted Genes: Olfr549, Olfr550, Olfr551

omitted Genes: Olfr552, Olfr553, Olfr554

omitted Genes: Olfr555, Olfr556, Trim68

omitted Genes: Olfr557, Olfr558, Olfr559

omitted Genes: Olfr560, Olfr561, Olfr564

omitted Genes: Olfr568, Olfr569, Olfr570

omitted Genes: Olfr571, Olfr572, Olfr574

omitted Genes: Olfr575, Olfr576, Olfr577

omitted Genes: Olfr578, Olfr582, Olfr583

omitted Genes: Olfr584, Olfr585, Olfr586

omitted Genes: Olfr589, Olfr591, Olfr592

omitted Genes: Olfr593, Olfr594, Usp17ld

omitted Genes: Olfr597, Olfr598, Olfr599

omitted Genes: Olfr600, Olfr601, Olfr603

omitted Genes: Usp17lc, Olfr606, Olfr609

Make more plots at <http://csg.sph.umich.edu/locuszoom/>

## Fine-mapping Regions

| snp            | chr | pos (Mb) | pp          | group        | color  |
|----------------|-----|----------|-------------|--------------|--------|
| chr7:101630176 | 7   | 101.6302 | 0.001789679 | Credible Set | purple |
| chr7:101660383 | 7   | 101.6604 | 0.010341918 | Credible Set | purple |
| chr7:101669186 | 7   | 101.6692 | 0.010354086 | Credible Set | purple |
| chr7:101673483 | 7   | 101.6735 | 0.010512090 | Credible Set | purple |
| chr7:101680140 | 7   | 101.6801 | 0.010567581 | Credible Set | purple |
| chr7:101731061 | 7   | 101.7311 | 0.012046240 | Credible Set | purple |
| chr7:101731110 | 7   | 101.7311 | 0.010042784 | Credible Set | purple |
| chr7:101731130 | 7   | 101.7311 | 0.007006876 | Credible Set | purple |
| chr7:101731658 | 7   | 101.7317 | 0.009875469 | Credible Set | purple |
| chr7:101751790 | 7   | 101.7518 | 0.010045918 | Credible Set | purple |
| chr7:101752580 | 7   | 101.7526 | 0.010142363 | Credible Set | purple |
| chr7:101752971 | 7   | 101.7530 | 0.010001728 | Credible Set | purple |
| chr7:101998679 | 7   | 101.9987 | 0.014114434 | Credible Set | purple |
| chr7:102016307 | 7   | 102.0163 | 0.015472808 | Credible Set | purple |
| chr7:102098054 | 7   | 102.0981 | 0.008537204 | Credible Set | purple |
| chr7:102110109 | 7   | 102.1101 | 0.008275023 | Credible Set | purple |
| chr7:102110501 | 7   | 102.1105 | 0.008757857 | Credible Set | purple |
| chr7:102116318 | 7   | 102.1163 | 0.008549278 | Credible Set | purple |
| chr7:102116430 | 7   | 102.1164 | 0.008549278 | Credible Set | purple |
| chr7:102116478 | 7   | 102.1165 | 0.008485512 | Credible Set | purple |
| chr7:102132562 | 7   | 102.1326 | 0.010142489 | Credible Set | purple |
| chr7:102162058 | 7   | 102.1621 | 0.001736170 | Credible Set | purple |
| chr7:102223396 | 7   | 102.2234 | 0.008946636 | Credible Set | purple |
| chr7:102240695 | 7   | 102.2407 | 0.010738925 | Credible Set | purple |
| chr7:102241191 | 7   | 102.2412 | 0.002888969 | Credible Set | purple |
| chr7:102241211 | 7   | 102.2412 | 0.002928719 | Credible Set | purple |
| chr7:102241212 | 7   | 102.2412 | 0.003006739 | Credible Set | purple |
| chr7:102306968 | 7   | 102.3070 | 0.018668175 | Credible Set | purple |
| chr7:102306978 | 7   | 102.3070 | 0.019080554 | Credible Set | purple |
| chr7:102317213 | 7   | 102.3172 | 0.016102328 | Credible Set | purple |
| chr7:102317246 | 7   | 102.3172 | 0.015242451 | Credible Set | purple |
| chr7:102319586 | 7   | 102.3196 | 0.024041039 | Credible Set | purple |
| chr7:102344970 | 7   | 102.3450 | 0.009674340 | Credible Set | purple |
| chr7:102363897 | 7   | 102.3639 | 0.009626705 | Credible Set | purple |
| chr7:102364204 | 7   | 102.3642 | 0.007395796 | Credible Set | purple |
| chr7:102364223 | 7   | 102.3642 | 0.007656479 | Credible Set | purple |

## Fine-mapping Regions

| snp            | chr | pos (Mb) | pp          | group        | color  |
|----------------|-----|----------|-------------|--------------|--------|
| chr7:102364315 | 7   | 102.3643 | 0.008959549 | Credible Set | purple |
| chr7:102364326 | 7   | 102.3643 | 0.008959549 | Credible Set | purple |
| chr7:102364411 | 7   | 102.3644 | 0.009244659 | Credible Set | purple |
| chr7:102385520 | 7   | 102.3855 | 0.011613288 | Credible Set | purple |
| chr7:102385536 | 7   | 102.3855 | 0.012917652 | Credible Set | purple |
| chr7:102423165 | 7   | 102.4232 | 0.007131428 | Credible Set | purple |
| chr7:102435692 | 7   | 102.4357 | 0.002263594 | Credible Set | purple |
| chr7:102435720 | 7   | 102.4357 | 0.002263594 | Credible Set | purple |
| chr7:102478469 | 7   | 102.4785 | 0.009598491 | Credible Set | purple |
| chr7:102510475 | 7   | 102.5105 | 0.010682947 | Credible Set | purple |
| chr7:102510607 | 7   | 102.5106 | 0.010835669 | Credible Set | purple |
| chr7:102516878 | 7   | 102.5169 | 0.010503596 | Credible Set | purple |
| chr7:102531652 | 7   | 102.5317 | 0.009797808 | Credible Set | purple |
| chr7:102561708 | 7   | 102.5617 | 0.010550785 | Credible Set | purple |
| chr7:102565262 | 7   | 102.5653 | 0.001148009 | Credible Set | purple |
| chr7:102565292 | 7   | 102.5653 | 0.001154438 | Credible Set | purple |
| chr7:102565307 | 7   | 102.5653 | 0.001140220 | Credible Set | purple |
| chr7:102565323 | 7   | 102.5653 | 0.001146602 | Credible Set | purple |
| chr7:102565329 | 7   | 102.5653 | 0.001146602 | Credible Set | purple |
| chr7:102565410 | 7   | 102.5654 | 0.006305334 | Credible Set | purple |
| chr7:102619418 | 7   | 102.6194 | 0.005272459 | Credible Set | purple |
| chr7:102619431 | 7   | 102.6194 | 0.005270062 | Credible Set | purple |
| chr7:102619466 | 7   | 102.6195 | 0.007407272 | Credible Set | purple |
| chr7:102757499 | 7   | 102.7575 | 0.009879928 | Credible Set | purple |
| chr7:103442570 | 7   | 103.4426 | 0.008109336 | Credible Set | purple |
| chr7:103564836 | 7   | 103.5648 | 0.008394521 | Credible Set | purple |
| chr7:103646439 | 7   | 103.6464 | 0.006321513 | Credible Set | purple |
| chr7:103646709 | 7   | 103.6467 | 0.005661752 | Credible Set | purple |
| chr7:103671033 | 7   | 103.6710 | 0.004942555 | Credible Set | purple |
| chr7:103760301 | 7   | 103.7603 | 0.002669575 | Credible Set | purple |
| chr7:103829200 | 7   | 103.8292 | 0.003963801 | Credible Set | purple |
| chr7:103837099 | 7   | 103.8371 | 0.002471471 | Credible Set | purple |
| chr7:103837213 | 7   | 103.8372 | 0.004586112 | Credible Set | purple |
| chr7:103915503 | 7   | 103.9155 | 0.011309668 | Credible Set | purple |
| chr7:103986792 | 7   | 103.9868 | 0.011456842 | Credible Set | purple |
| chr7:103986795 | 7   | 103.9868 | 0.011456842 | Credible Set | purple |



## Fine-mapping Regions

| snp            | chr | pos (Mb) | pp          | group        | color  |
|----------------|-----|----------|-------------|--------------|--------|
| chr7:103986857 | 7   | 103.9869 | 0.011456499 | Credible Set | purple |
| chr7:103986860 | 7   | 103.9869 | 0.011456499 | Credible Set | purple |
| chr7:104012808 | 7   | 104.0128 | 0.010878150 | Credible Set | purple |
| chr7:104013370 | 7   | 104.0134 | 0.009686578 | Credible Set | purple |
| chr7:104013395 | 7   | 104.0134 | 0.008931380 | Credible Set | purple |
| chr7:104013467 | 7   | 104.0135 | 0.011329190 | Credible Set | purple |
| chr7:104129734 | 7   | 104.1297 | 0.023467857 | Credible Set | purple |
| chr7:104129736 | 7   | 104.1297 | 0.023467857 | Credible Set | purple |
| chr7:104138934 | 7   | 104.1389 | 0.001940021 | Credible Set | purple |
| chr7:104138936 | 7   | 104.1389 | 0.001961076 | Credible Set | purple |
| chr7:104138968 | 7   | 104.1390 | 0.001961076 | Credible Set | purple |
| chr7:104141343 | 7   | 104.1413 | 0.018365898 | Credible Set | purple |
| chr7:104141705 | 7   | 104.1417 | 0.006700518 | Credible Set | purple |
| chr7:104141768 | 7   | 104.1418 | 0.006704119 | Credible Set | purple |
| chr7:104149893 | 7   | 104.1499 | 0.004845480 | Credible Set | purple |
| chr7:104149911 | 7   | 104.1499 | 0.005032014 | Credible Set | purple |
| chr7:104170588 | 7   | 104.1706 | 0.010091899 | Credible Set | purple |
| chr7:104170594 | 7   | 104.1706 | 0.010042296 | Credible Set | purple |
| chr7:104170618 | 7   | 104.1706 | 0.010049479 | Credible Set | purple |
| chr7:104170662 | 7   | 104.1707 | 0.010049479 | Credible Set | purple |
| chr7:104338784 | 7   | 104.3388 | 0.014201135 | Credible Set | purple |
| chr7:104338810 | 7   | 104.3388 | 0.014048140 | Credible Set | purple |
| chr7:104353491 | 7   | 104.3535 | 0.004481911 | Credible Set | purple |
| chr7:104356230 | 7   | 104.3562 | 0.006449043 | Credible Set | purple |
| chr7:104430205 | 7   | 104.4302 | 0.009070232 | Credible Set | purple |
| chr7:104485236 | 7   | 104.4852 | 0.040217316 | Credible Set | purple |
| chr7:104485721 | 7   | 104.4857 | 0.016996983 | Credible Set | purple |
| chr7:104485727 | 7   | 104.4857 | 0.016932289 | Credible Set | purple |
| chr7:104486022 | 7   | 104.4860 | 0.004611366 | Credible Set | purple |
| chr7:104486041 | 7   | 104.4860 | 0.004771599 | Credible Set | purple |
| chr7:104507724 | 7   | 104.5077 | 0.016806775 | Credible Set | purple |
| chr7:104508127 | 7   | 104.5081 | 0.017848907 | Credible Set | purple |
| chr7:104508173 | 7   | 104.5082 | 0.012718918 | Credible Set | purple |
| chr7:104580091 | 7   | 104.5801 | 0.003289964 | Credible Set | purple |
| chr7:105411752 | 7   | 105.4118 | 0.001502488 | Credible Set | purple |

F34 GBS, retic parameters mean reticulocyte volume, repeat

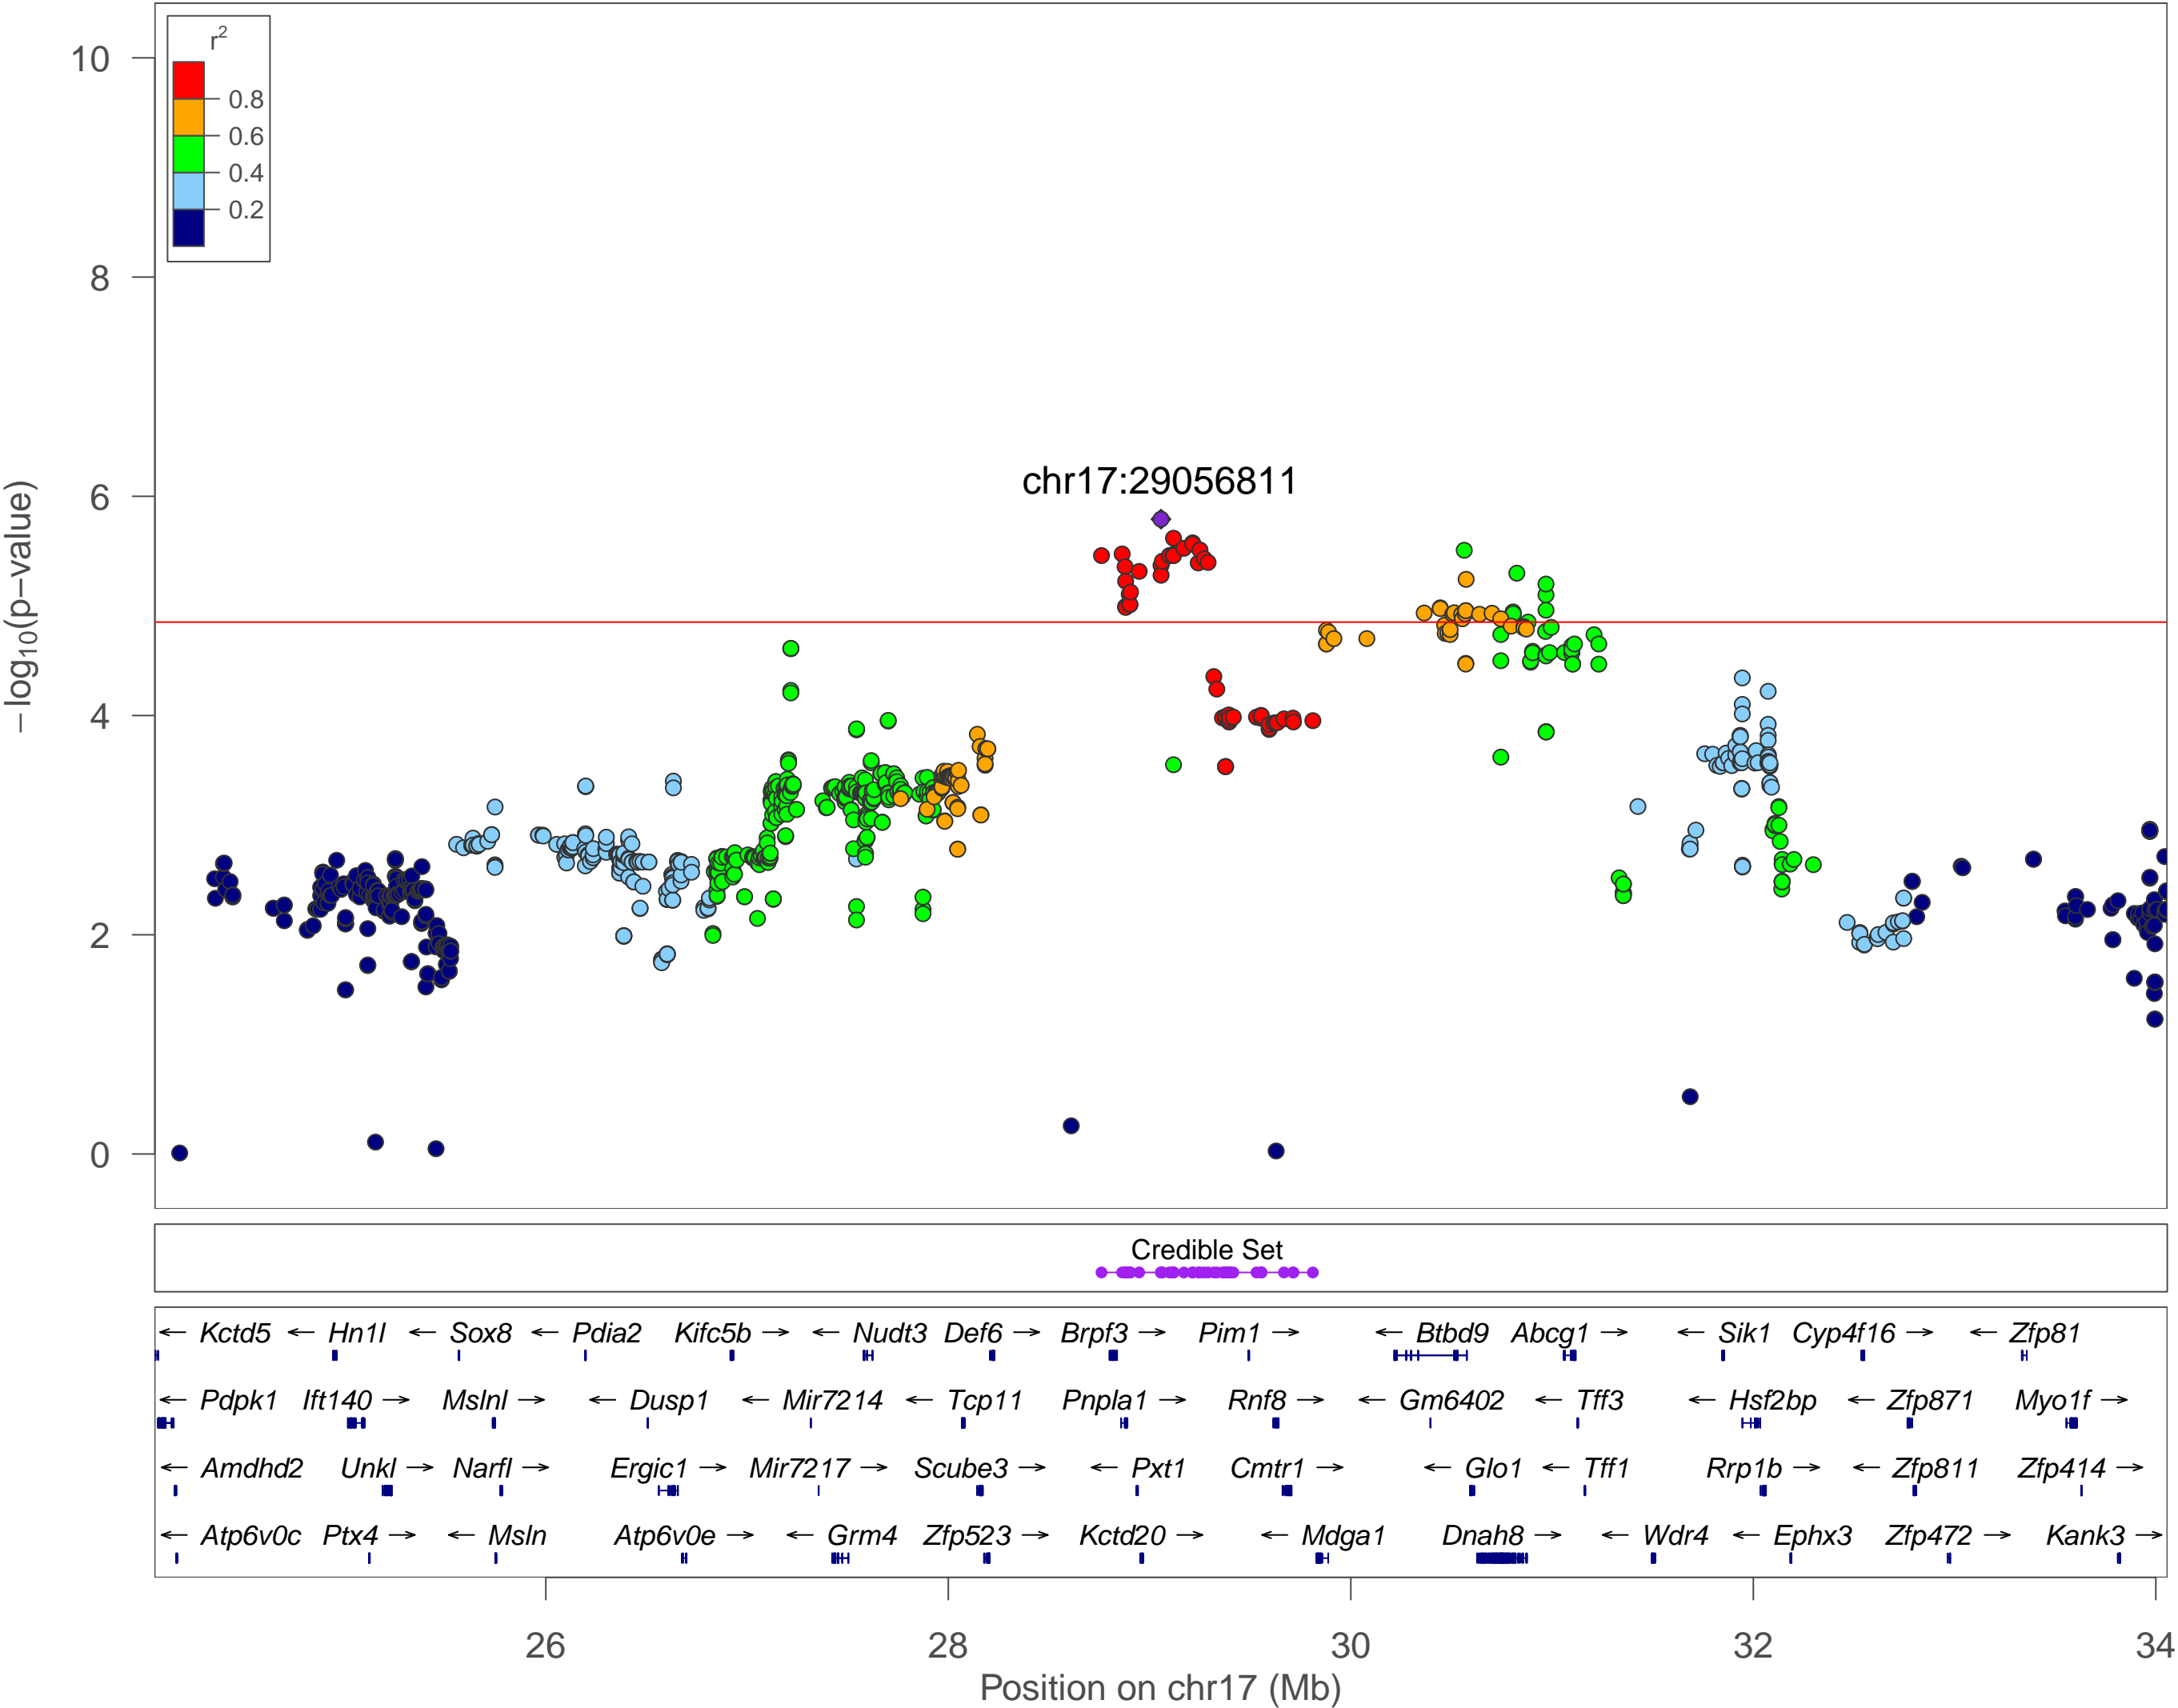

date: Thu Oct 25 17:08:18 2018

build: F34GBS

display range: chr17:24056811–34056811 [24056811–34056811]

hilite range: 0 – 0 [ 0 – 0 ]

reference SNP: chr17:29056811

number of SNPs plotted: 1034

min P-value: 1.62E–6 [chr17:29056811]

max P-value: 9.79E–1 [chr17:24180740]

omitted Genes: Tbc1d24, Ntn3, 1600002H07Rik

omitted Genes: Ccnf, Mir5134, Mir6965

omitted Genes: Abca17, Abca3, D330041H03Rik

omitted Genes: Rnps1, Eci1, Dnase1l2

omitted Genes: E4f1, Pgp, Mlst8

omitted Genes: Bricd5, Caskin1, Traf7

omitted Genes: Rab26os, Rab26, Pkd1

omitted Genes: Tsc2, Nthl1, Slc9a3r2

omitted Genes: Npw, Zfp598, Syngn3

omitted Genes: Gfer, Noxo1, Tbl3

omitted Genes: Rnf151, Snhg9, Snora78

omitted Genes: Rps2, Snora64, Ndubf10

omitted Genes: Rpl3l, Msrb1, Hs3st6

omitted Genes: Meib1, Fahd1, Hagl

omitted Genes: Igfbp3, Nubp2, Spsb3

omitted Genes: Eme2, Mrps34, Nme3

omitted Genes: Mapk8ip3, Cramp1l, Tmem204

omitted Genes: Telo2, Clcn7, Ccdc154

omitted Genes: BC003965, Gnptg, Tsr3

omitted Genes: Baiap3, Mir3547, Ube2i

omitted Genes: Gm17801, Prss34, Prss28

omitted Genes: Prss29, Tpsab1, Tpsb2

omitted Genes: Tpsg1, Cacna1h, Tekt4

omitted Genes: Sstr5, 2810468N07Rik, Lmf1

omitted Genes: Gng13, Chtf18, Rpusd1

omitted Genes: Hagl, Mir6966, Ccdc78

omitted Genes: Fam173a, Metrnl, Fbxl16

omitted Genes: Wdr24, Jmjd8, Stub1

omitted Genes: Mir3082, Rhbdl1, Rhot2

omitted Genes: Wdr90, Fam195a, 0610011F06Rik

omitted Genes: Wfikkn1, Rab40a, Gm10012

omitted Genes: Pigg, Nhlh4, Ccnp15

Make more plots at <http://csg.sph.umich.edu/locuszoom/>

## Fine-mapping Regions

| snp            | chr | pos (Mb) | pp          | group        | color  |
|----------------|-----|----------|-------------|--------------|--------|
| chr17:28761178 | 17  | 28.76118 | 0.039188938 | Credible Set | purple |
| chr17:28863817 | 17  | 28.86382 | 0.040517206 | Credible Set | purple |
| chr17:28878343 | 17  | 28.87834 | 0.031303527 | Credible Set | purple |
| chr17:28881088 | 17  | 28.88109 | 0.023421851 | Credible Set | purple |
| chr17:28881365 | 17  | 28.88136 | 0.014063971 | Credible Set | purple |
| chr17:28881407 | 17  | 28.88141 | 0.014064568 | Credible Set | purple |
| chr17:28881418 | 17  | 28.88142 | 0.013837047 | Credible Set | purple |
| chr17:28898789 | 17  | 28.89879 | 0.017992089 | Credible Set | purple |
| chr17:28902111 | 17  | 28.90211 | 0.014593218 | Credible Set | purple |
| chr17:28902126 | 17  | 28.90213 | 0.014663526 | Credible Set | purple |
| chr17:28905249 | 17  | 28.90525 | 0.018805268 | Credible Set | purple |
| chr17:28948304 | 17  | 28.94830 | 0.028528967 | Credible Set | purple |
| chr17:29056811 | 17  | 29.05681 | 0.081720674 | Credible Set | purple |
| chr17:29056940 | 17  | 29.05694 | 0.032169094 | Credible Set | purple |
| chr17:29057099 | 17  | 29.05710 | 0.026402913 | Credible Set | purple |
| chr17:29063670 | 17  | 29.06367 | 0.034972664 | Credible Set | purple |
| chr17:29098722 | 17  | 29.09872 | 0.039188938 | Credible Set | purple |
| chr17:29115818 | 17  | 29.11582 | 0.039188938 | Credible Set | purple |
| chr17:29118933 | 17  | 29.11893 | 0.055623342 | Credible Set | purple |
| chr17:29119041 | 17  | 29.11904 | 0.040175332 | Credible Set | purple |
| chr17:29119131 | 17  | 29.11913 | 0.039139174 | Credible Set | purple |
| chr17:29170505 | 17  | 29.17050 | 0.045422919 | Credible Set | purple |
| chr17:29213919 | 17  | 29.21392 | 0.050655738 | Credible Set | purple |
| chr17:29213920 | 17  | 29.21392 | 0.049427962 | Credible Set | purple |
| chr17:29241654 | 17  | 29.24165 | 0.033809733 | Credible Set | purple |
| chr17:29250546 | 17  | 29.25055 | 0.043869269 | Credible Set | purple |
| chr17:29271835 | 17  | 29.27183 | 0.036699318 | Credible Set | purple |
| chr17:29290714 | 17  | 29.29071 | 0.034151497 | Credible Set | purple |
| chr17:29319189 | 17  | 29.31919 | 0.003470127 | Credible Set | purple |
| chr17:29334046 | 17  | 29.33405 | 0.002703281 | Credible Set | purple |
| chr17:29362178 | 17  | 29.36218 | 0.001526830 | Credible Set | purple |
| chr17:29377491 | 17  | 29.37749 | 0.001550025 | Credible Set | purple |
| chr17:29378435 | 17  | 29.37843 | 0.001550025 | Credible Set | purple |
| chr17:29378474 | 17  | 29.37847 | 0.001557110 | Credible Set | purple |
| chr17:29378507 | 17  | 29.37851 | 0.001560914 | Credible Set | purple |
| chr17:29378548 | 17  | 29.37855 | 0.001563726 | Credible Set | purple |

Fine-mapping Regions

| snp            | chr | pos (Mb) | pp          | group        | color  |
|----------------|-----|----------|-------------|--------------|--------|
| chr17:29393566 | 17  | 29.39357 | 0.001618165 | Credible Set | purple |
| chr17:29395215 | 17  | 29.39522 | 0.001405790 | Credible Set | purple |
| chr17:29395231 | 17  | 29.39523 | 0.001457827 | Credible Set | purple |
| chr17:29398643 | 17  | 29.39864 | 0.001529801 | Credible Set | purple |
| chr17:29415986 | 17  | 29.41599 | 0.001550025 | Credible Set | purple |
| chr17:29531394 | 17  | 29.53139 | 0.001550025 | Credible Set | purple |
| chr17:29553602 | 17  | 29.55360 | 0.001603443 | Credible Set | purple |
| chr17:29554963 | 17  | 29.55496 | 0.001515483 | Credible Set | purple |
| chr17:29555542 | 17  | 29.55554 | 0.001524576 | Credible Set | purple |
| chr17:29555787 | 17  | 29.55579 | 0.001593175 | Credible Set | purple |
| chr17:29667798 | 17  | 29.66780 | 0.001496360 | Credible Set | purple |
| chr17:29712556 | 17  | 29.71256 | 0.001518835 | Credible Set | purple |
| chr17:29714755 | 17  | 29.71476 | 0.001408293 | Credible Set | purple |
| chr17:29811310 | 17  | 29.81131 | 0.001443688 | Credible Set | purple |

F34 GBS, retic parameters mean reticulocyte volume, repeat

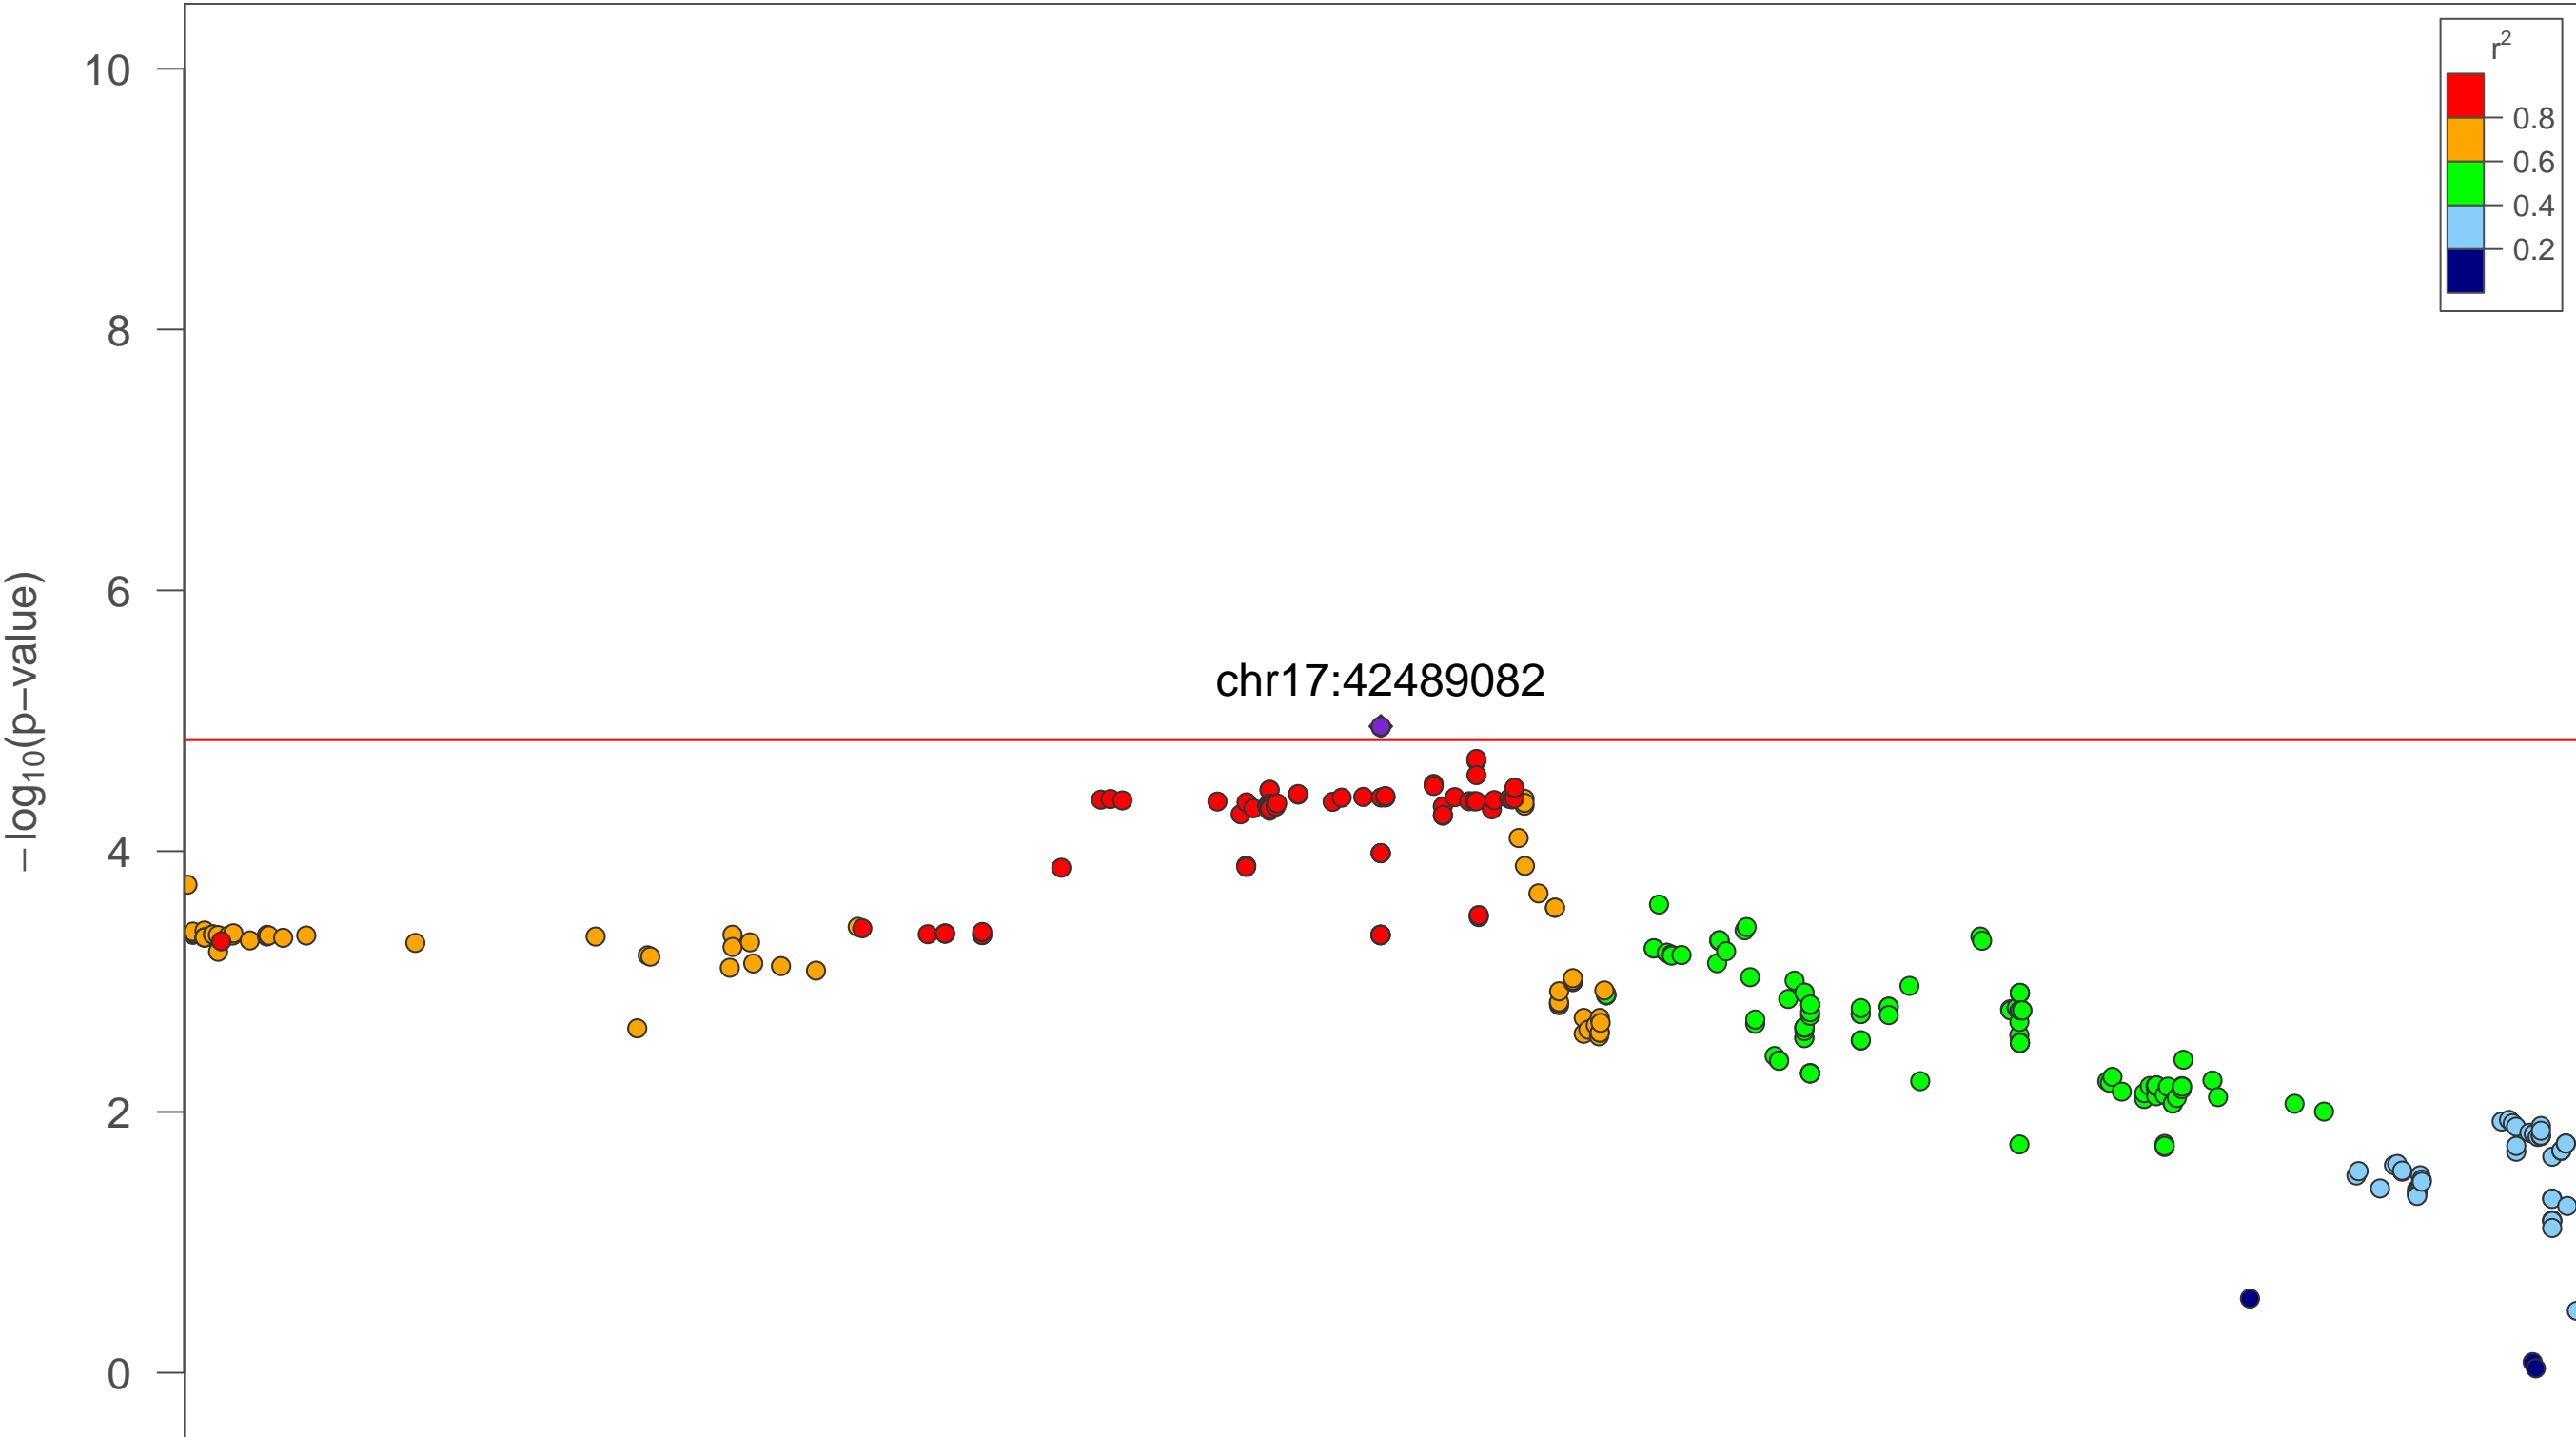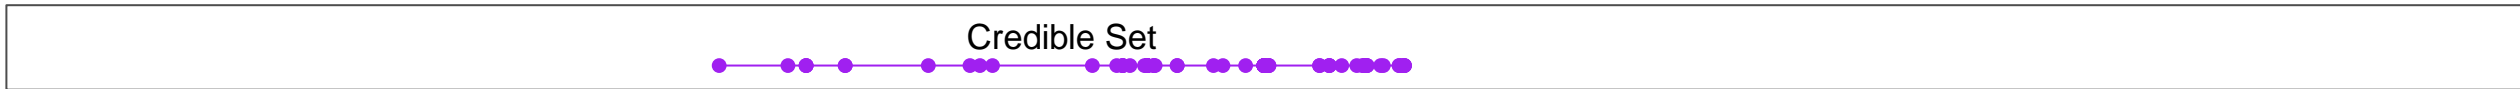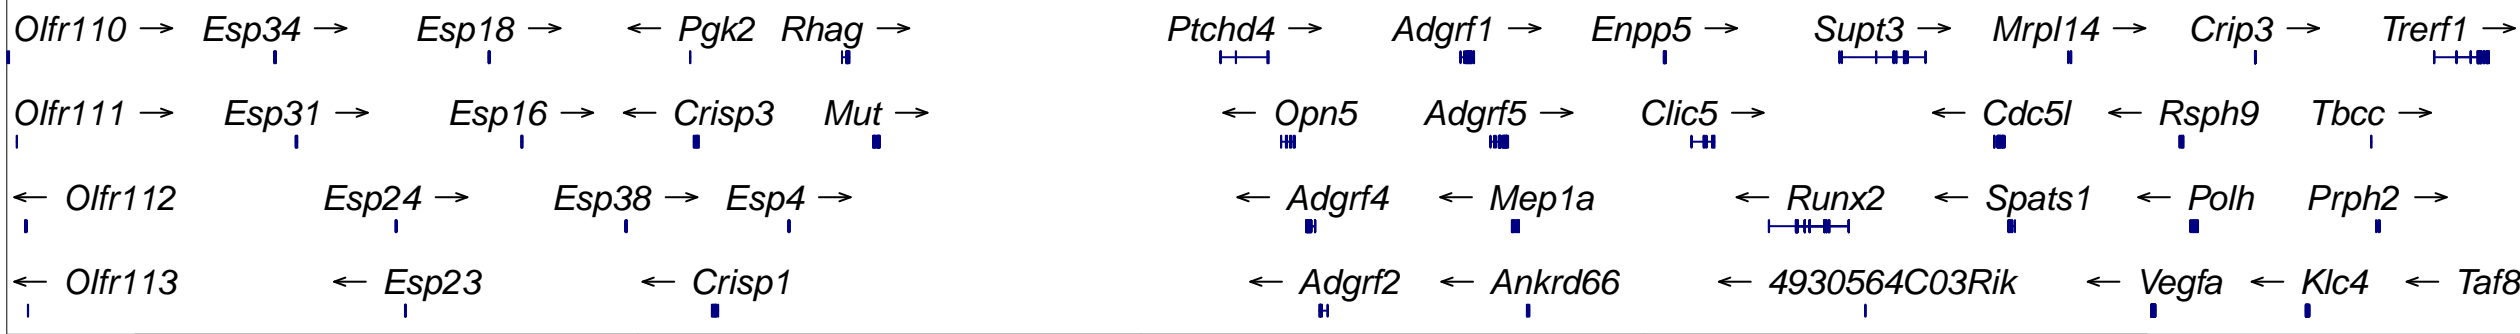

98 genes  
omitted

date: Thu Oct 25 17:08:28 2018

build: F34GBS

display range: chr17:37489082–47489082 [37489082–47489082]

hilite range: 0 – 0 [ 0 – 0 ]

reference SNP: chr17:42489082

number of SNPs plotted: 292

min P-value: 1.1E–5 [chr17:42489082]

max P-value: 9.26E–1 [chr17:47315006]

omitted Genes: Olfr114, Olfr115, Olfr116

omitted Genes: Olfr117, Olfr118, Olfr119

omitted Genes: Olfr120, Olfr121, Olfr122

omitted Genes: Olfr123, Olfr124, Olfr125

omitted Genes: Olfr126, Olfr127, Olfr128

omitted Genes: Olfr761, Olfr129, Olfr130

omitted Genes: Olfr131, Olfr132, Olfr133

omitted Genes: Olfr134, Olfr135, Olfr138

omitted Genes: Olfr137, Olfr136, Esp36

omitted Genes: Esp15, Esp8, Esp6

omitted Genes: Gm44501, Esp5, Esp3

omitted Genes: Esp1, Crisp2, 9130008F23Rik

omitted Genes: Glyatl3, Cenpq, Cd2ap

omitted Genes: Tnfrsf21, E130008D07Rik, Pla2g7

omitted Genes: 1700071M16Rik, Tdrd6, Slc25a27

omitted Genes: Cyp39a1, Rcan2, Enpp4

omitted Genes: B230354K17Rik, Aars2, Tcte1

omitted Genes: Tmem151b, Nfkbie, Slc35b2

omitted Genes: Hsp90ab1, Slc29a1, Gm7325

omitted Genes: Capn11, Tmem63b, 1600014C23Rik

omitted Genes: Mrps18a, Mad2l1bp, Gtpbp2

omitted Genes: Xpo5, Mir693, Polr1c

omitted Genes: Yipf3, Lrrc73, Tjap1

omitted Genes: Dlk2, Abcc10, Zfp318

omitted Genes: Slc22a7, Ttbk1, Dnph1

omitted Genes: Cul9, Srf, Mir6976

omitted Genes: Ptk7, Mrpl2, Cul7

omitted Genes: Rrp36, Klhdc3, Mea1

omitted Genes: Ppp2r5d, Pex6, Gnmt

omitted Genes: Cnpy3, Ptcra, 2310039H08Rik

omitted Genes: Rpl7l1, Gltscr1, Mllp2

omitted Genes: Mrps10, Guca1b, Guca1a

Make more plots at <http://csg.sph.umich.edu/locuszoom/>

## Fine-mapping Regions

| snp            | chr | pos (Mb) | pp          | group        | color  |
|----------------|-----|----------|-------------|--------------|--------|
| chr17:40322995 | 17  | 40.32299 | 0.001925994 | Credible Set | purple |
| chr17:40596316 | 17  | 40.59632 | 0.001747708 | Credible Set | purple |
| chr17:40668615 | 17  | 40.66862 | 0.001767481 | Credible Set | purple |
| chr17:40668642 | 17  | 40.66864 | 0.001767481 | Credible Set | purple |
| chr17:40668650 | 17  | 40.66865 | 0.001767481 | Credible Set | purple |
| chr17:40823871 | 17  | 40.82387 | 0.001728030 | Credible Set | purple |
| chr17:40824165 | 17  | 40.82417 | 0.001813987 | Credible Set | purple |
| chr17:41154429 | 17  | 41.15443 | 0.005256147 | Credible Set | purple |
| chr17:41320112 | 17  | 41.32011 | 0.016393635 | Credible Set | purple |
| chr17:41359808 | 17  | 41.35981 | 0.016568127 | Credible Set | purple |
| chr17:41409714 | 17  | 41.40971 | 0.016183259 | Credible Set | purple |
| chr17:41806772 | 17  | 41.80677 | 0.015882965 | Credible Set | purple |
| chr17:41903568 | 17  | 41.90357 | 0.012834321 | Credible Set | purple |
| chr17:41926884 | 17  | 41.92688 | 0.005444641 | Credible Set | purple |
| chr17:41926899 | 17  | 41.92690 | 0.005334929 | Credible Set | purple |
| chr17:41928375 | 17  | 41.92838 | 0.015676900 | Credible Set | purple |
| chr17:41956148 | 17  | 41.95615 | 0.014177500 | Credible Set | purple |
| chr17:42013920 | 17  | 42.01392 | 0.014708796 | Credible Set | purple |
| chr17:42023895 | 17  | 42.02390 | 0.013943435 | Credible Set | purple |
| chr17:42024466 | 17  | 42.02447 | 0.013623376 | Credible Set | purple |
| chr17:42024515 | 17  | 42.02452 | 0.019357133 | Credible Set | purple |
| chr17:42024583 | 17  | 42.02458 | 0.019312048 | Credible Set | purple |
| chr17:42024700 | 17  | 42.02470 | 0.015320345 | Credible Set | purple |
| chr17:42024755 | 17  | 42.02475 | 0.014674524 | Credible Set | purple |
| chr17:42024810 | 17  | 42.02481 | 0.014743765 | Credible Set | purple |
| chr17:42025311 | 17  | 42.02531 | 0.014105814 | Credible Set | purple |
| chr17:42050395 | 17  | 42.05040 | 0.014971741 | Credible Set | purple |
| chr17:42050673 | 17  | 42.05067 | 0.014596565 | Credible Set | purple |
| chr17:42056191 | 17  | 42.05619 | 0.015407444 | Credible Set | purple |
| chr17:42143893 | 17  | 42.14389 | 0.017848640 | Credible Set | purple |
| chr17:42143896 | 17  | 42.14390 | 0.018014846 | Credible Set | purple |
| chr17:42288066 | 17  | 42.28807 | 0.015812708 | Credible Set | purple |
| chr17:42325798 | 17  | 42.32580 | 0.016958613 | Credible Set | purple |
| chr17:42416069 | 17  | 42.41607 | 0.017164316 | Credible Set | purple |
| chr17:42488210 | 17  | 42.48821 | 0.001731401 | Credible Set | purple |
| chr17:42488216 | 17  | 42.48822 | 0.001728455 | Credible Set | purple |



## Fine-mapping Regions

| snp            | chr | pos (Mb) | pp          | group        | color  |
|----------------|-----|----------|-------------|--------------|--------|
| chr17:42488241 | 17  | 42.48824 | 0.001738098 | Credible Set | purple |
| chr17:42488701 | 17  | 42.48870 | 0.006698897 | Credible Set | purple |
| chr17:42488808 | 17  | 42.48881 | 0.006713565 | Credible Set | purple |
| chr17:42488822 | 17  | 42.48882 | 0.006699569 | Credible Set | purple |
| chr17:42489082 | 17  | 42.48908 | 0.056233892 | Credible Set | purple |
| chr17:42489130 | 17  | 42.48913 | 0.055350303 | Credible Set | purple |
| chr17:42489886 | 17  | 42.48989 | 0.016997208 | Credible Set | purple |
| chr17:42508272 | 17  | 42.50827 | 0.017063167 | Credible Set | purple |
| chr17:42508276 | 17  | 42.50828 | 0.017063167 | Credible Set | purple |
| chr17:42508349 | 17  | 42.50835 | 0.017412448 | Credible Set | purple |
| chr17:42710063 | 17  | 42.71006 | 0.021358708 | Credible Set | purple |
| chr17:42710132 | 17  | 42.71013 | 0.020640815 | Credible Set | purple |
| chr17:42748429 | 17  | 42.74843 | 0.014648457 | Credible Set | purple |
| chr17:42748810 | 17  | 42.74881 | 0.012528564 | Credible Set | purple |
| chr17:42748868 | 17  | 42.74887 | 0.012720279 | Credible Set | purple |
| chr17:42798191 | 17  | 42.79819 | 0.017098002 | Credible Set | purple |
| chr17:42857918 | 17  | 42.85792 | 0.015971822 | Credible Set | purple |
| chr17:42879412 | 17  | 42.87941 | 0.015951100 | Credible Set | purple |
| chr17:42888048 | 17  | 42.88805 | 0.015954438 | Credible Set | purple |
| chr17:42888694 | 17  | 42.88869 | 0.031411853 | Credible Set | purple |
| chr17:42888751 | 17  | 42.88875 | 0.032480984 | Credible Set | purple |
| chr17:42888758 | 17  | 42.88876 | 0.024729093 | Credible Set | purple |
| chr17:42898383 | 17  | 42.89838 | 0.002394195 | Credible Set | purple |
| chr17:42898392 | 17  | 42.89839 | 0.002318784 | Credible Set | purple |
| chr17:42898421 | 17  | 42.89842 | 0.002388373 | Credible Set | purple |
| chr17:42953111 | 17  | 42.95311 | 0.013939538 | Credible Set | purple |
| chr17:42963409 | 17  | 42.96341 | 0.016270304 | Credible Set | purple |
| chr17:43026300 | 17  | 43.02630 | 0.016705390 | Credible Set | purple |
| chr17:43026388 | 17  | 43.02639 | 0.016705390 | Credible Set | purple |
| chr17:43037723 | 17  | 43.03772 | 0.016470016 | Credible Set | purple |
| chr17:43047345 | 17  | 43.04734 | 0.016767498 | Credible Set | purple |
| chr17:43047599 | 17  | 43.04760 | 0.019782062 | Credible Set | purple |
| chr17:43047622 | 17  | 43.04762 | 0.020063233 | Credible Set | purple |

F34 GBS, retic parameters cell hemoglobin concentration mean, repeat

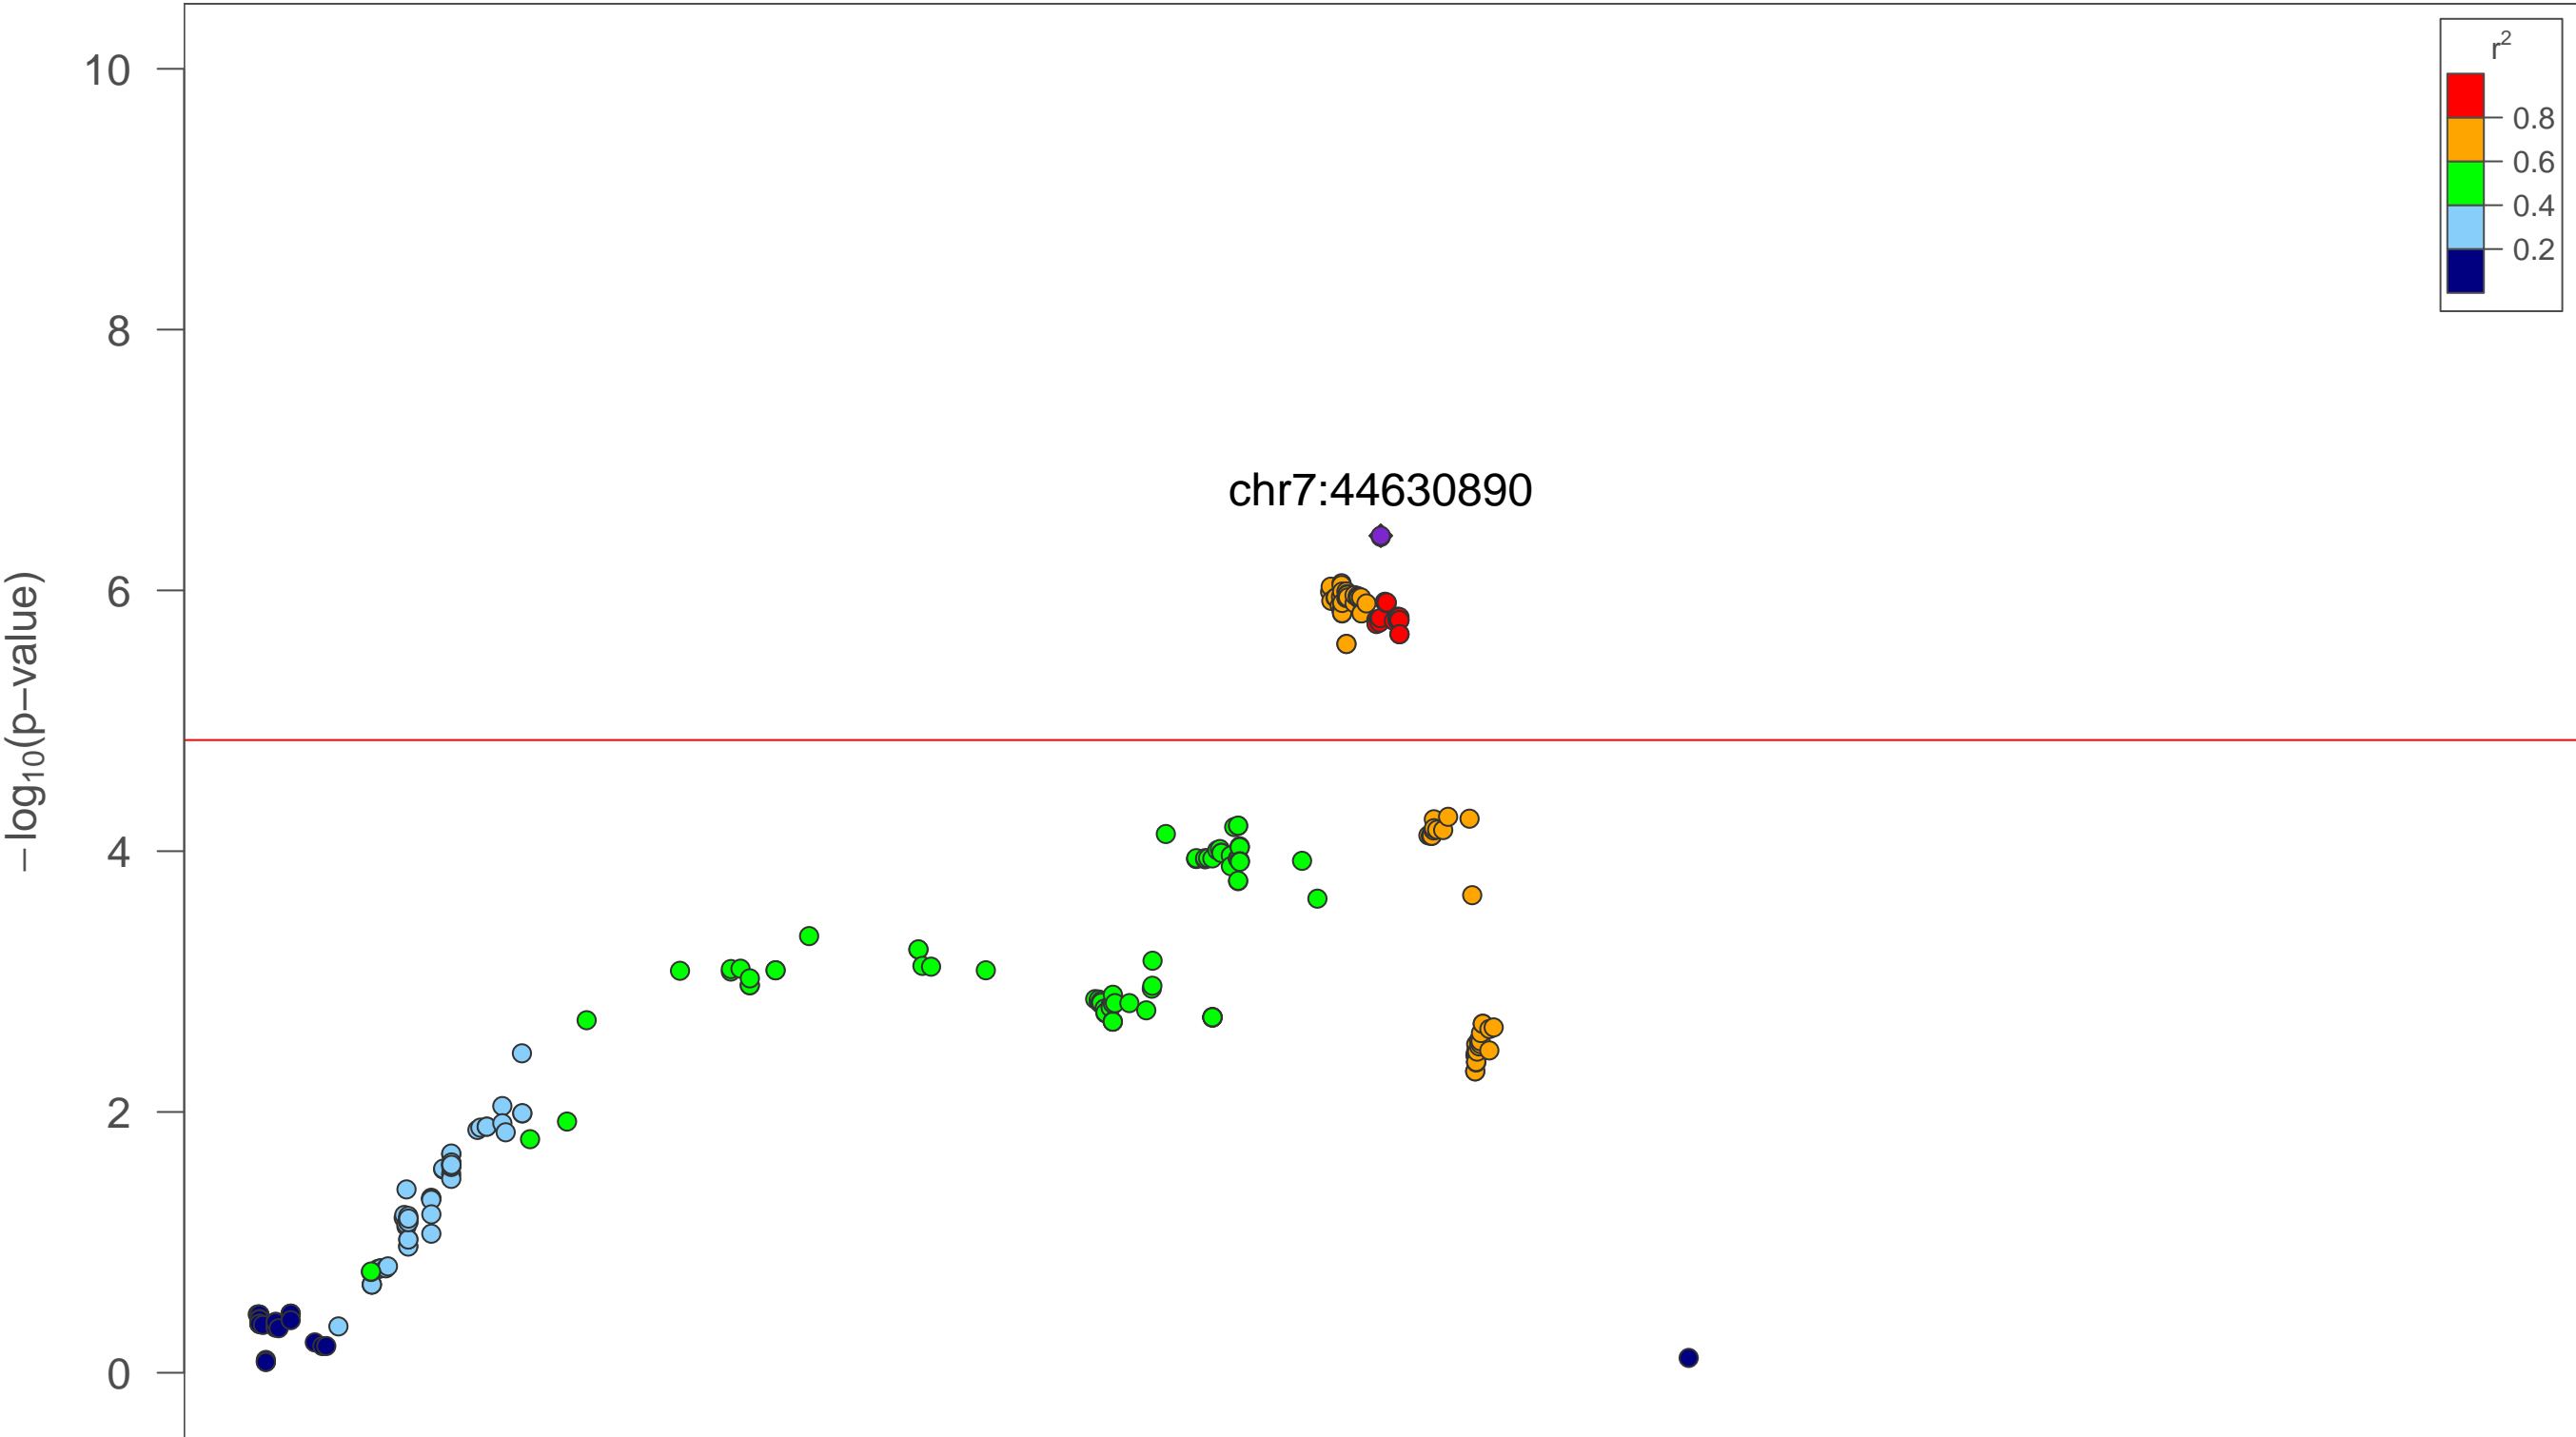

Credible Set

4933402C06Rik → ← Vmn2r58 ← Vmn2r62 ← Cd33 Klk1b3 → Il4i1 → Ntf5 → Nomo1 → ← Saa1 ← Mrgpra3 ← Mrgprb1 Nav2 →  
← A230077H06Rik ← Vmn2r59 ← Vmn2r63 Ctu1 → ← Acpt ← Atf5 Hrc → ← Emp3 ← Tph1 ← Mrgpra2a Mrgprb8 →  
Vstm2b → Vmn2r60 → Gm9268 → Klk12 → Syt3 → Irf3 → Bcat2 → Otog → Ldhc → ← Mrgpra4 ← Csrp3  
4930433I11Rik → Vmn2r61 → Zfp936 → Klk6 → Lrrc4b → ← Fcgrt Ntn5 → Munc → ← Ptpn5 ← Mrgprx1 ← E2f8

197 genes  
omitted

Position on chr7 (Mb)

date: Thu Oct 25 17:09:29 2018

build: F34GBS

display range: chr7:39630890–49630890 [39630890–49630890]

hilite range: 0 – 0 [ 0 – 0 ]

reference SNP: chr7:44630890

number of SNPs plotted: 247

min P-value: 3.81E–7 [chr7:44630890]

max P-value: 8.26E–1 [chr7:39972874]

omitted Genes: Gm4884, 1700110I07Rik, Gm5592

omitted Genes: AI987944, Vmn2r57, AW146154

omitted Genes: Zfp788, Vmn2r-ps54, Vmn2r-ps60

omitted Genes: 4933421I07Rik, Zfp141, 9830147E19Rik

omitted Genes: Gm5595, Gm2381, EU599041

omitted Genes: Zfp715, Siglecf, Siglecg

omitted Genes: Lim2, Nkg7, Cldnd2

omitted Genes: Etfb, Mir7051, Vsig10l

omitted Genes: Iglon5, 4931406B18Rik, Zfp658

omitted Genes: Zfp719, Zfp819, Ceacam18

omitted Genes: Siglece, Klk14, Klk13

omitted Genes: 2310002F09Rik, Klk11, Klk10

omitted Genes: Klk9, Klk8, Klk7

omitted Genes: Klk5, Klk4, Klk15

omitted Genes: Klk1b7-ps, Klk1b8, Klk1b1

omitted Genes: Klk1b9, Klk1b11, Klk1b26

omitted Genes: Klk1b27, Klk1b21, Klk1b22

omitted Genes: Klk1b16, Klk1b24, Klk1b4

omitted Genes: Klk1b5, Klk1, 1700028J19Rik

omitted Genes: 2410002F23Rik, Snord88c, Snord88a

omitted Genes: Clec11a, Shank1, 1700008O03Rik

omitted Genes: Aspdh, Josd2, Mir7052

omitted Genes: 5430431A17Rik, Emc10, Fam71e1

omitted Genes: Mybpc2, Spib, Pold1

omitted Genes: Mir7053, Nr1h2, Napsa

omitted Genes: Kcnc3, Myh14, Izumo2

omitted Genes: Zfp473, Vrk3, Nup62

omitted Genes: Gm21948, Tbc1d17, Akt1s1

omitted Genes: Mir707, Pnkp, Ptov1

omitted Genes: Med25, Fuz, Ap2a1

omitted Genes: Tsks, Cpt1c, Prrm1

omitted Genes: Gm15545, Rpl2l12, Scf1

Make more plots at <http://csg.sph.umich.edu/locuszoom/>

## Fine-mapping Regions

| snp           | chr | pos (Mb) | pp         | group        | color  |
|---------------|-----|----------|------------|--------------|--------|
| chr7:44612740 | 7   | 44.61274 | 0.04036894 | Credible Set | purple |
| chr7:44613080 | 7   | 44.61308 | 0.03742242 | Credible Set | purple |
| chr7:44623189 | 7   | 44.62319 | 0.04048152 | Credible Set | purple |
| chr7:44625757 | 7   | 44.62576 | 0.03838420 | Credible Set | purple |
| chr7:44628444 | 7   | 44.62844 | 0.04138907 | Credible Set | purple |
| chr7:44630865 | 7   | 44.63087 | 0.16463846 | Credible Set | purple |
| chr7:44630890 | 7   | 44.63089 | 0.16806321 | Credible Set | purple |
| chr7:44647914 | 7   | 44.64791 | 0.05468613 | Credible Set | purple |
| chr7:44655619 | 7   | 44.65562 | 0.05331551 | Credible Set | purple |
| chr7:44655640 | 7   | 44.65564 | 0.05403463 | Credible Set | purple |
| chr7:44685749 | 7   | 44.68575 | 0.03949794 | Credible Set | purple |
| chr7:44700610 | 7   | 44.70061 | 0.04246376 | Credible Set | purple |
| chr7:44700692 | 7   | 44.70069 | 0.04002805 | Credible Set | purple |
| chr7:44708823 | 7   | 44.70882 | 0.04002805 | Credible Set | purple |
| chr7:44708981 | 7   | 44.70898 | 0.04215076 | Credible Set | purple |
| chr7:44708990 | 7   | 44.70899 | 0.04006775 | Credible Set | purple |
| chr7:44708997 | 7   | 44.70900 | 0.03148981 | Credible Set | purple |
| chr7:44709016 | 7   | 44.70902 | 0.03148981 | Credible Set | purple |

F34 GBS, retic parameters cell hemoglobin concentration mean, repeat

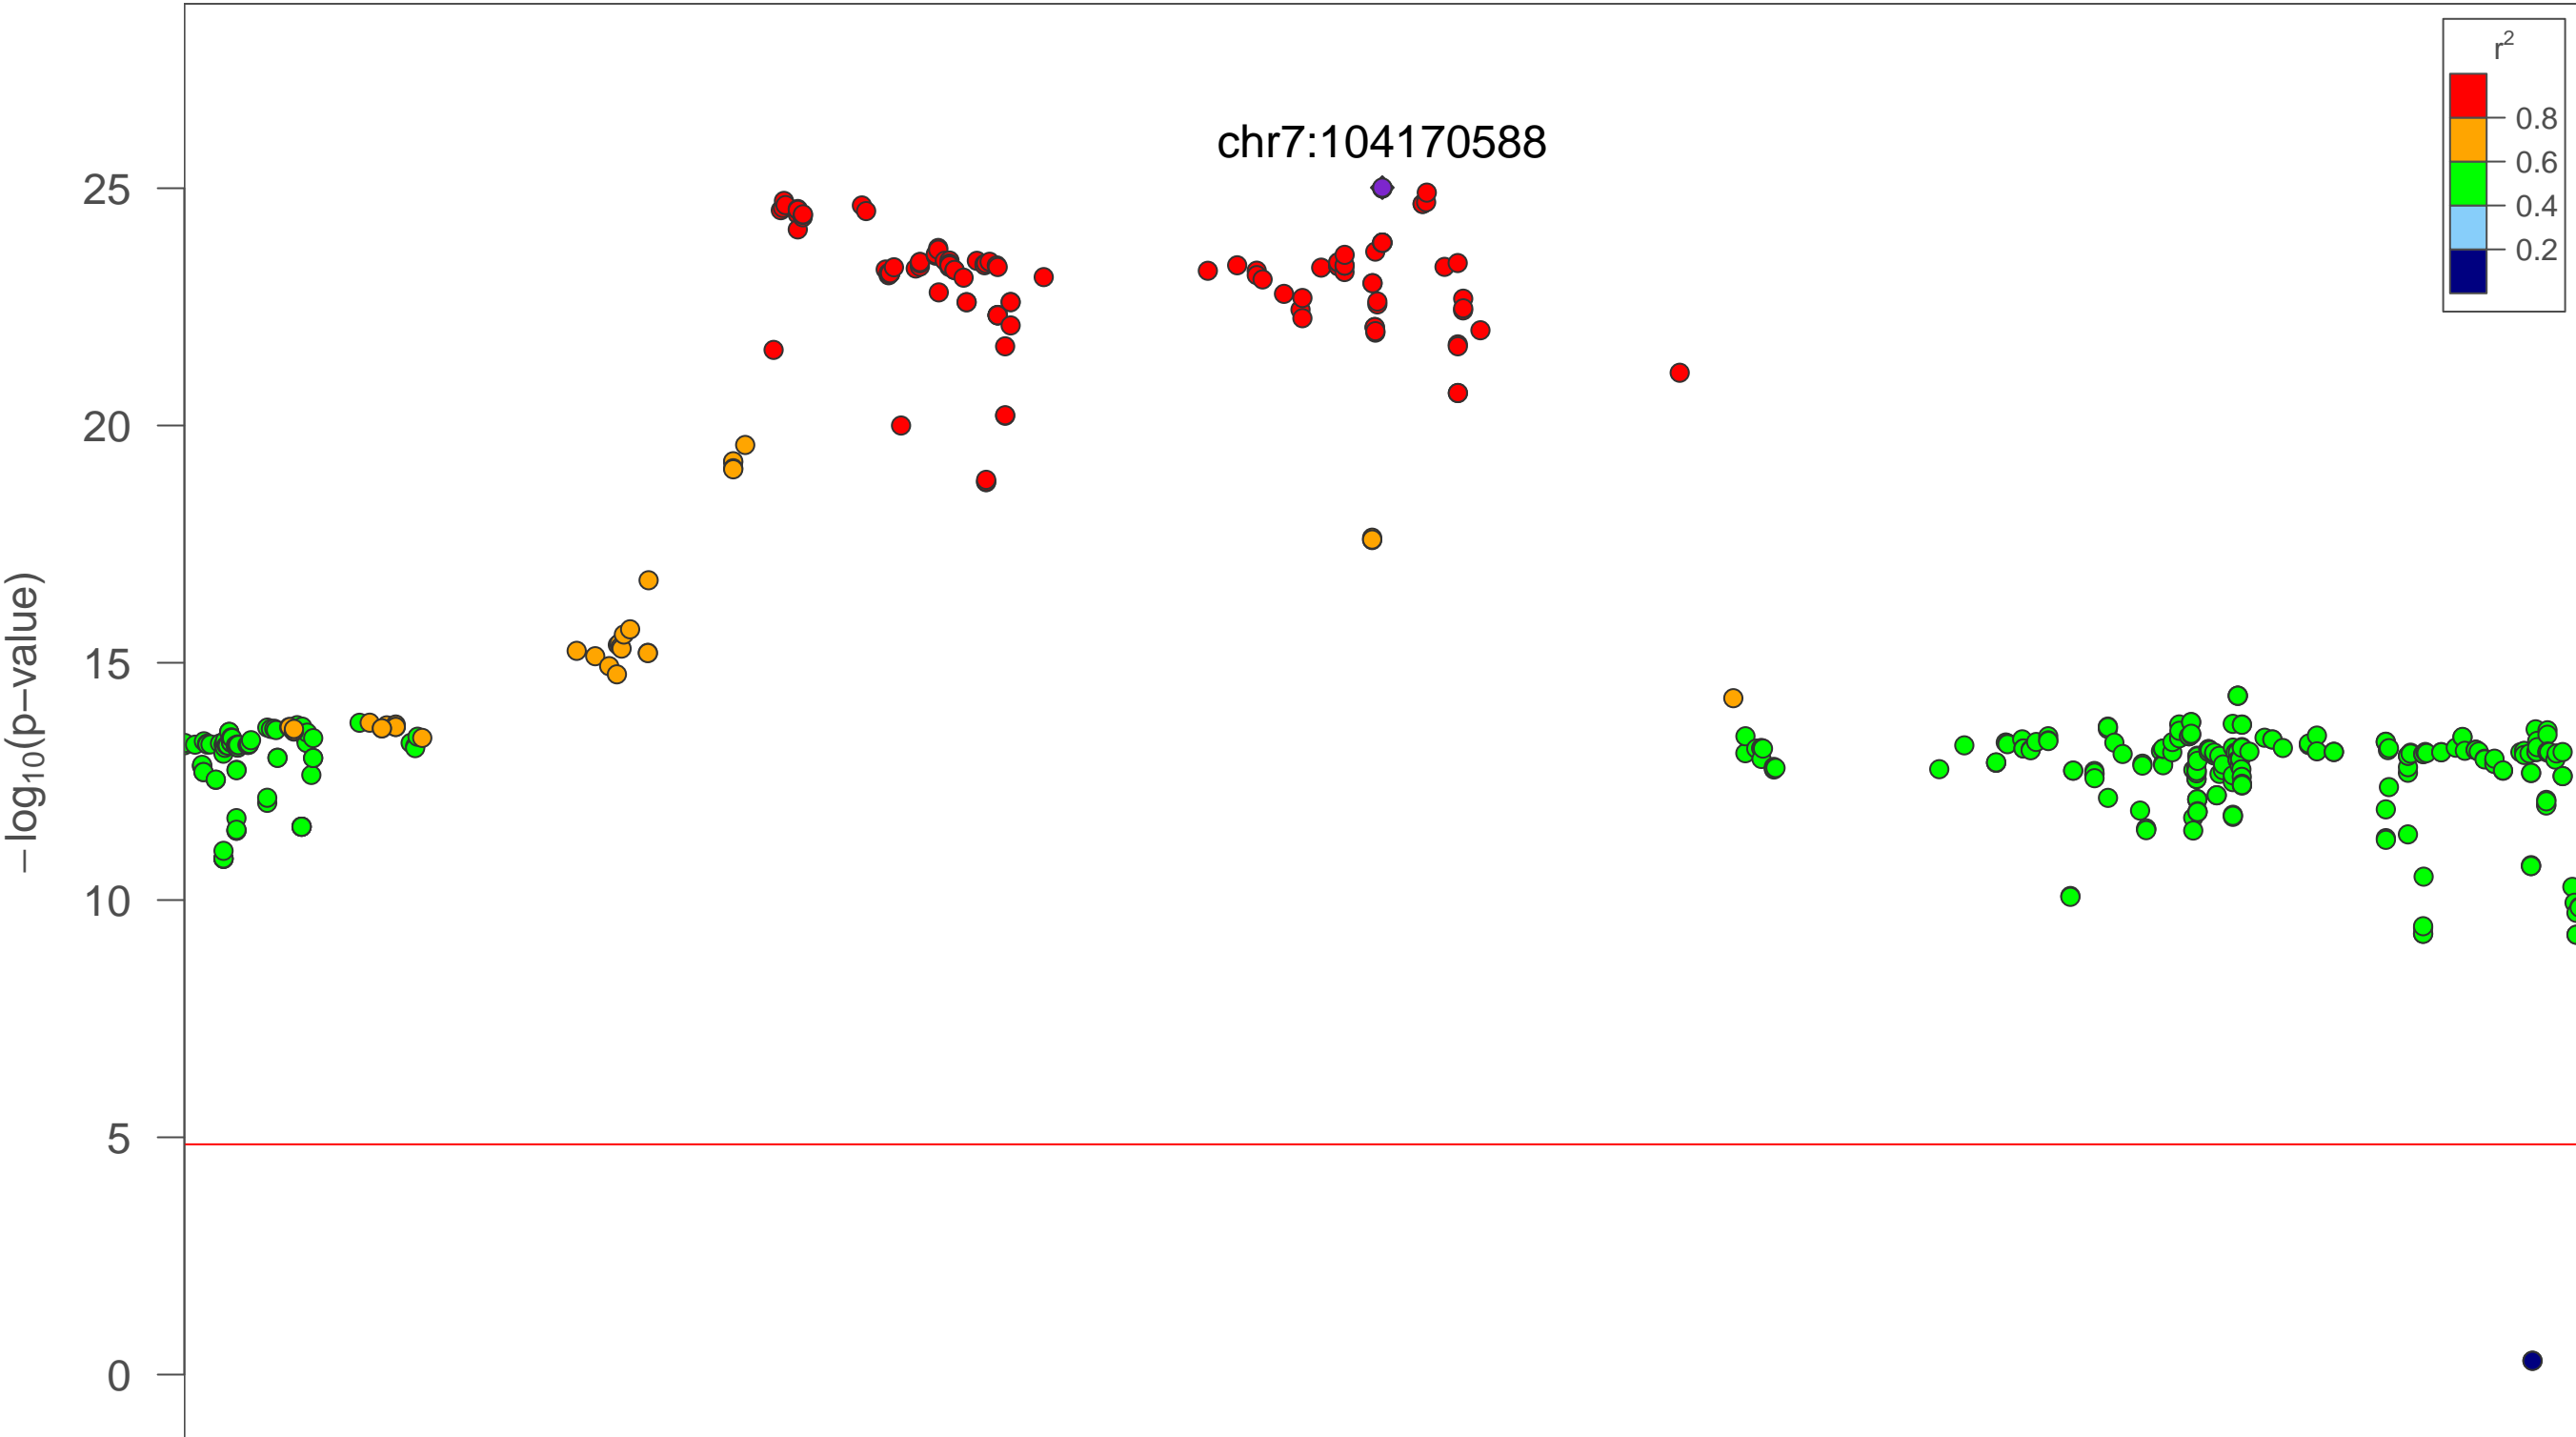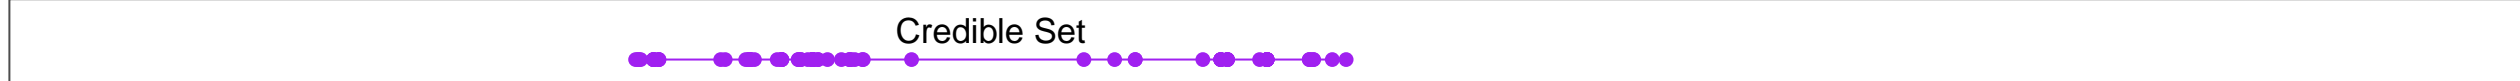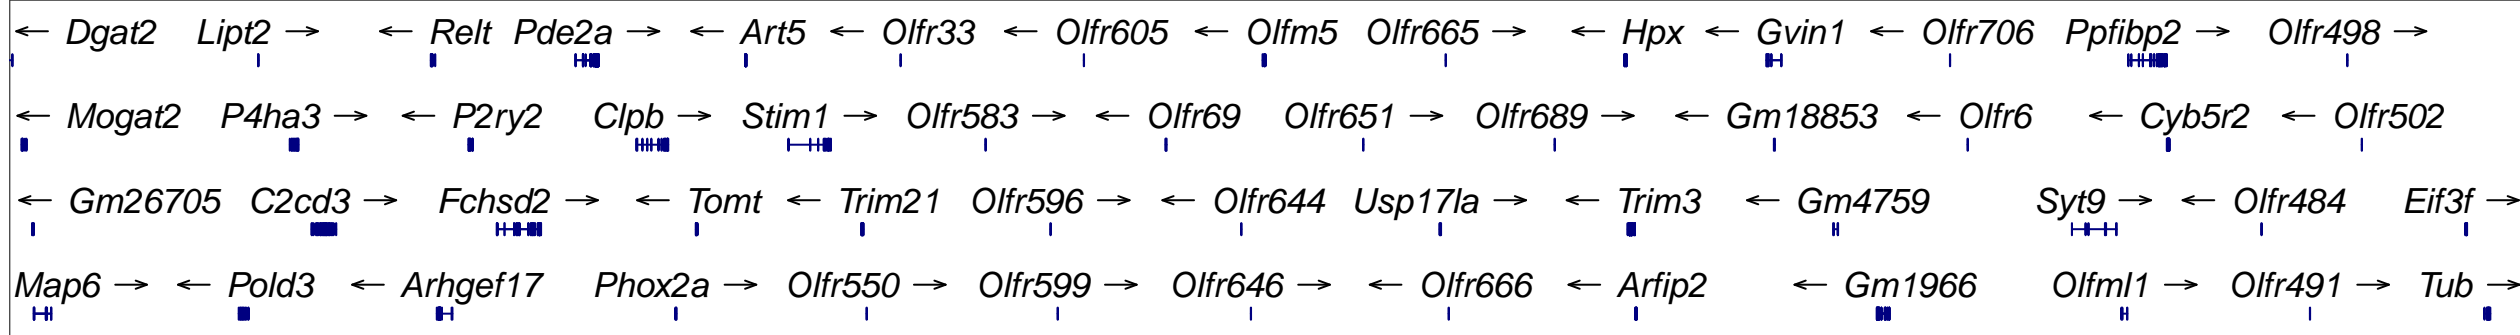

276 genes  
omitted

Position on chr7 (Mb)

date: Thu Oct 25 17:09:16 2018

build: F34GBS

display range: chr7:99170588–109170588 [99170588–109170588]

hilite range: 0 – 0 [ 0 – 0 ]

reference SNP: chr7:104170588

number of SNPs plotted: 464

min P-value: 9.7E–26 [chr7:104170588]

max P-value: 5.14E–1 [chr7:108970724]

omitted Genes: Serpinh1, Gdpd5, Khlh35

omitted Genes: Rps3, Snord15b, Snord15a

omitted Genes: Arrb1, Mir326, Tpbgl

omitted Genes: Slco2b1, Olfr520, Olfr521

omitted Genes: Neu3, Spcs2, Xrra1

omitted Genes: Rnf169, Chrdl2, Kcne3

omitted Genes: Pgm2l1, Gpx2-ps1, Ppme1

omitted Genes: Ucp3, Ucp2, Dnajb13

omitted Genes: Coa4, Mrpl48, Rab6a

omitted Genes: Plekhhb1, Fam168a, Mir3102

omitted Genes: P2ry6, Atg16l2, Stard10

omitted Genes: Arap1, Mir139, Art2a-ps

omitted Genes: Art2b, Inpp1, Folr2

omitted Genes: Folr1, Anapc15, Lamtor1

omitted Genes: Lrrc51, Numa1, Il18bp

omitted Genes: Rnf121, Xndc1, Xntrpc

omitted Genes: Trpc2, Art1, Chrna10

omitted Genes: Nup98, Pgap2, Rhog

omitted Genes: Rrm1, Olfr543, Olfr544

omitted Genes: Olfr545, Olfr547, Olfr549

omitted Genes: Olfr551, Olfr552, Olfr553

omitted Genes: Olfr554, Olfr555, Olfr556

omitted Genes: Trim68, Olfr557, Olfr558

omitted Genes: Olfr559, Olfr78, Olfr560

omitted Genes: Olfr561, Olfr564, Olfr566

omitted Genes: Olfr568, Olfr569, Olfr570

omitted Genes: Olfr571, Olfr572, Olfr574

omitted Genes: Olfr575, Olfr576, Olfr577

omitted Genes: Olfr578, Olfr582, Olfr584

omitted Genes: Olfr585, Olfr586, Olfr589

omitted Genes: Olfr591, Olfr592, Olfr593

omitted Genes: Olfr594, Ucp17ld, Olfr597

Make more plots at <http://csg.sph.umich.edu/locuszoom/>

## Fine-mapping Regions

| snp            | chr | pos (Mb) | pp          | group        | color  |
|----------------|-----|----------|-------------|--------------|--------|
| chr7:101660383 | 7   | 101.6604 | 0.027801217 | Credible Set | purple |
| chr7:101669186 | 7   | 101.6692 | 0.031049930 | Credible Set | purple |
| chr7:101673483 | 7   | 101.6735 | 0.043524010 | Credible Set | purple |
| chr7:101680140 | 7   | 101.6801 | 0.035559081 | Credible Set | purple |
| chr7:101731061 | 7   | 101.7311 | 0.029442197 | Credible Set | purple |
| chr7:101731110 | 7   | 101.7311 | 0.022726636 | Credible Set | purple |
| chr7:101731130 | 7   | 101.7311 | 0.011029991 | Credible Set | purple |
| chr7:101731658 | 7   | 101.7317 | 0.028189047 | Credible Set | purple |
| chr7:101751790 | 7   | 101.7518 | 0.019767205 | Credible Set | purple |
| chr7:101752580 | 7   | 101.7526 | 0.022135716 | Credible Set | purple |
| chr7:101752971 | 7   | 101.7530 | 0.022819663 | Credible Set | purple |
| chr7:101998679 | 7   | 101.9987 | 0.034974170 | Credible Set | purple |
| chr7:102016307 | 7   | 102.0163 | 0.026659422 | Credible Set | purple |
| chr7:102098054 | 7   | 102.0981 | 0.001606431 | Credible Set | purple |
| chr7:102110109 | 7   | 102.1101 | 0.001218167 | Credible Set | purple |
| chr7:102110501 | 7   | 102.1105 | 0.001359069 | Credible Set | purple |
| chr7:102116318 | 7   | 102.1163 | 0.001317094 | Credible Set | purple |
| chr7:102116430 | 7   | 102.1164 | 0.001317094 | Credible Set | purple |
| chr7:102116478 | 7   | 102.1165 | 0.001341070 | Credible Set | purple |
| chr7:102132562 | 7   | 102.1326 | 0.001789863 | Credible Set | purple |
| chr7:102223396 | 7   | 102.2234 | 0.001684376 | Credible Set | purple |
| chr7:102240695 | 7   | 102.2407 | 0.001845753 | Credible Set | purple |
| chr7:102241191 | 7   | 102.2412 | 0.002162235 | Credible Set | purple |
| chr7:102241211 | 7   | 102.2412 | 0.002304696 | Credible Set | purple |
| chr7:102241212 | 7   | 102.2412 | 0.002300427 | Credible Set | purple |
| chr7:102306968 | 7   | 102.3070 | 0.003118473 | Credible Set | purple |
| chr7:102306978 | 7   | 102.3070 | 0.003347757 | Credible Set | purple |
| chr7:102317213 | 7   | 102.3172 | 0.004528046 | Credible Set | purple |
| chr7:102317246 | 7   | 102.3172 | 0.004161109 | Credible Set | purple |
| chr7:102344970 | 7   | 102.3450 | 0.002447528 | Credible Set | purple |
| chr7:102363897 | 7   | 102.3639 | 0.001811027 | Credible Set | purple |
| chr7:102364204 | 7   | 102.3642 | 0.001991464 | Credible Set | purple |
| chr7:102364223 | 7   | 102.3642 | 0.002469608 | Credible Set | purple |
| chr7:102364315 | 7   | 102.3643 | 0.002114340 | Credible Set | purple |
| chr7:102364326 | 7   | 102.3643 | 0.002114340 | Credible Set | purple |
| chr7:102364411 | 7   | 102.3644 | 0.001962401 | Credible Set | purple |

## Fine-mapping Regions

| snp            | chr | pos (Mb) | pp          | group        | color  |
|----------------|-----|----------|-------------|--------------|--------|
| chr7:102385520 | 7   | 102.3855 | 0.001560069 | Credible Set | purple |
| chr7:102385536 | 7   | 102.3855 | 0.001573554 | Credible Set | purple |
| chr7:102423165 | 7   | 102.4232 | 0.001084442 | Credible Set | purple |
| chr7:102478469 | 7   | 102.4785 | 0.002439839 | Credible Set | purple |
| chr7:102510475 | 7   | 102.5105 | 0.002079327 | Credible Set | purple |
| chr7:102510607 | 7   | 102.5106 | 0.001969508 | Credible Set | purple |
| chr7:102516878 | 7   | 102.5169 | 0.002144741 | Credible Set | purple |
| chr7:102531652 | 7   | 102.5317 | 0.002332695 | Credible Set | purple |
| chr7:102561708 | 7   | 102.5617 | 0.001958134 | Credible Set | purple |
| chr7:102565410 | 7   | 102.5654 | 0.001808287 | Credible Set | purple |
| chr7:102757499 | 7   | 102.7575 | 0.001115733 | Credible Set | purple |
| chr7:103442570 | 7   | 103.4426 | 0.001511749 | Credible Set | purple |
| chr7:103564836 | 7   | 103.5648 | 0.001968672 | Credible Set | purple |
| chr7:103646439 | 7   | 103.6464 | 0.001519819 | Credible Set | purple |
| chr7:103646709 | 7   | 103.6467 | 0.001225704 | Credible Set | purple |
| chr7:103915503 | 7   | 103.9155 | 0.001757102 | Credible Set | purple |
| chr7:103986792 | 7   | 103.9868 | 0.001891418 | Credible Set | purple |
| chr7:103986795 | 7   | 103.9868 | 0.001891418 | Credible Set | purple |
| chr7:103986857 | 7   | 103.9869 | 0.002271127 | Credible Set | purple |
| chr7:103986860 | 7   | 103.9869 | 0.002271127 | Credible Set | purple |
| chr7:104012808 | 7   | 104.0128 | 0.001422940 | Credible Set | purple |
| chr7:104013370 | 7   | 104.0134 | 0.001937644 | Credible Set | purple |
| chr7:104013395 | 7   | 104.0134 | 0.001946171 | Credible Set | purple |
| chr7:104013467 | 7   | 104.0135 | 0.003250796 | Credible Set | purple |
| chr7:104141343 | 7   | 104.1413 | 0.003794442 | Credible Set | purple |
| chr7:104170479 | 7   | 104.1705 | 0.005874467 | Credible Set | purple |
| chr7:104170506 | 7   | 104.1705 | 0.005802691 | Credible Set | purple |
| chr7:104170518 | 7   | 104.1705 | 0.005834985 | Credible Set | purple |
| chr7:104170522 | 7   | 104.1705 | 0.005815978 | Credible Set | purple |
| chr7:104170543 | 7   | 104.1705 | 0.005836372 | Credible Set | purple |
| chr7:104170588 | 7   | 104.1706 | 0.082301601 | Credible Set | purple |
| chr7:104170594 | 7   | 104.1706 | 0.081799969 | Credible Set | purple |
| chr7:104170618 | 7   | 104.1706 | 0.079054313 | Credible Set | purple |
| chr7:104170662 | 7   | 104.1707 | 0.079054313 | Credible Set | purple |
| chr7:104338784 | 7   | 104.3388 | 0.037642915 | Credible Set | purple |
| chr7:104338810 | 7   | 104.3388 | 0.037589759 | Credible Set | purple |



Fine-mapping Regions

| snp            | chr | pos (Mb) | pp          | group        | color  |
|----------------|-----|----------|-------------|--------------|--------|
| chr7:104353491 | 7   | 104.3535 | 0.040828316 | Credible Set | purple |
| chr7:104356230 | 7   | 104.3562 | 0.064752467 | Credible Set | purple |
| chr7:104430205 | 7   | 104.4302 | 0.001824304 | Credible Set | purple |
| chr7:104485236 | 7   | 104.4852 | 0.002191823 | Credible Set | purple |

F34 GBS, retic parameters cell hemoglobin concentration mean, repeat

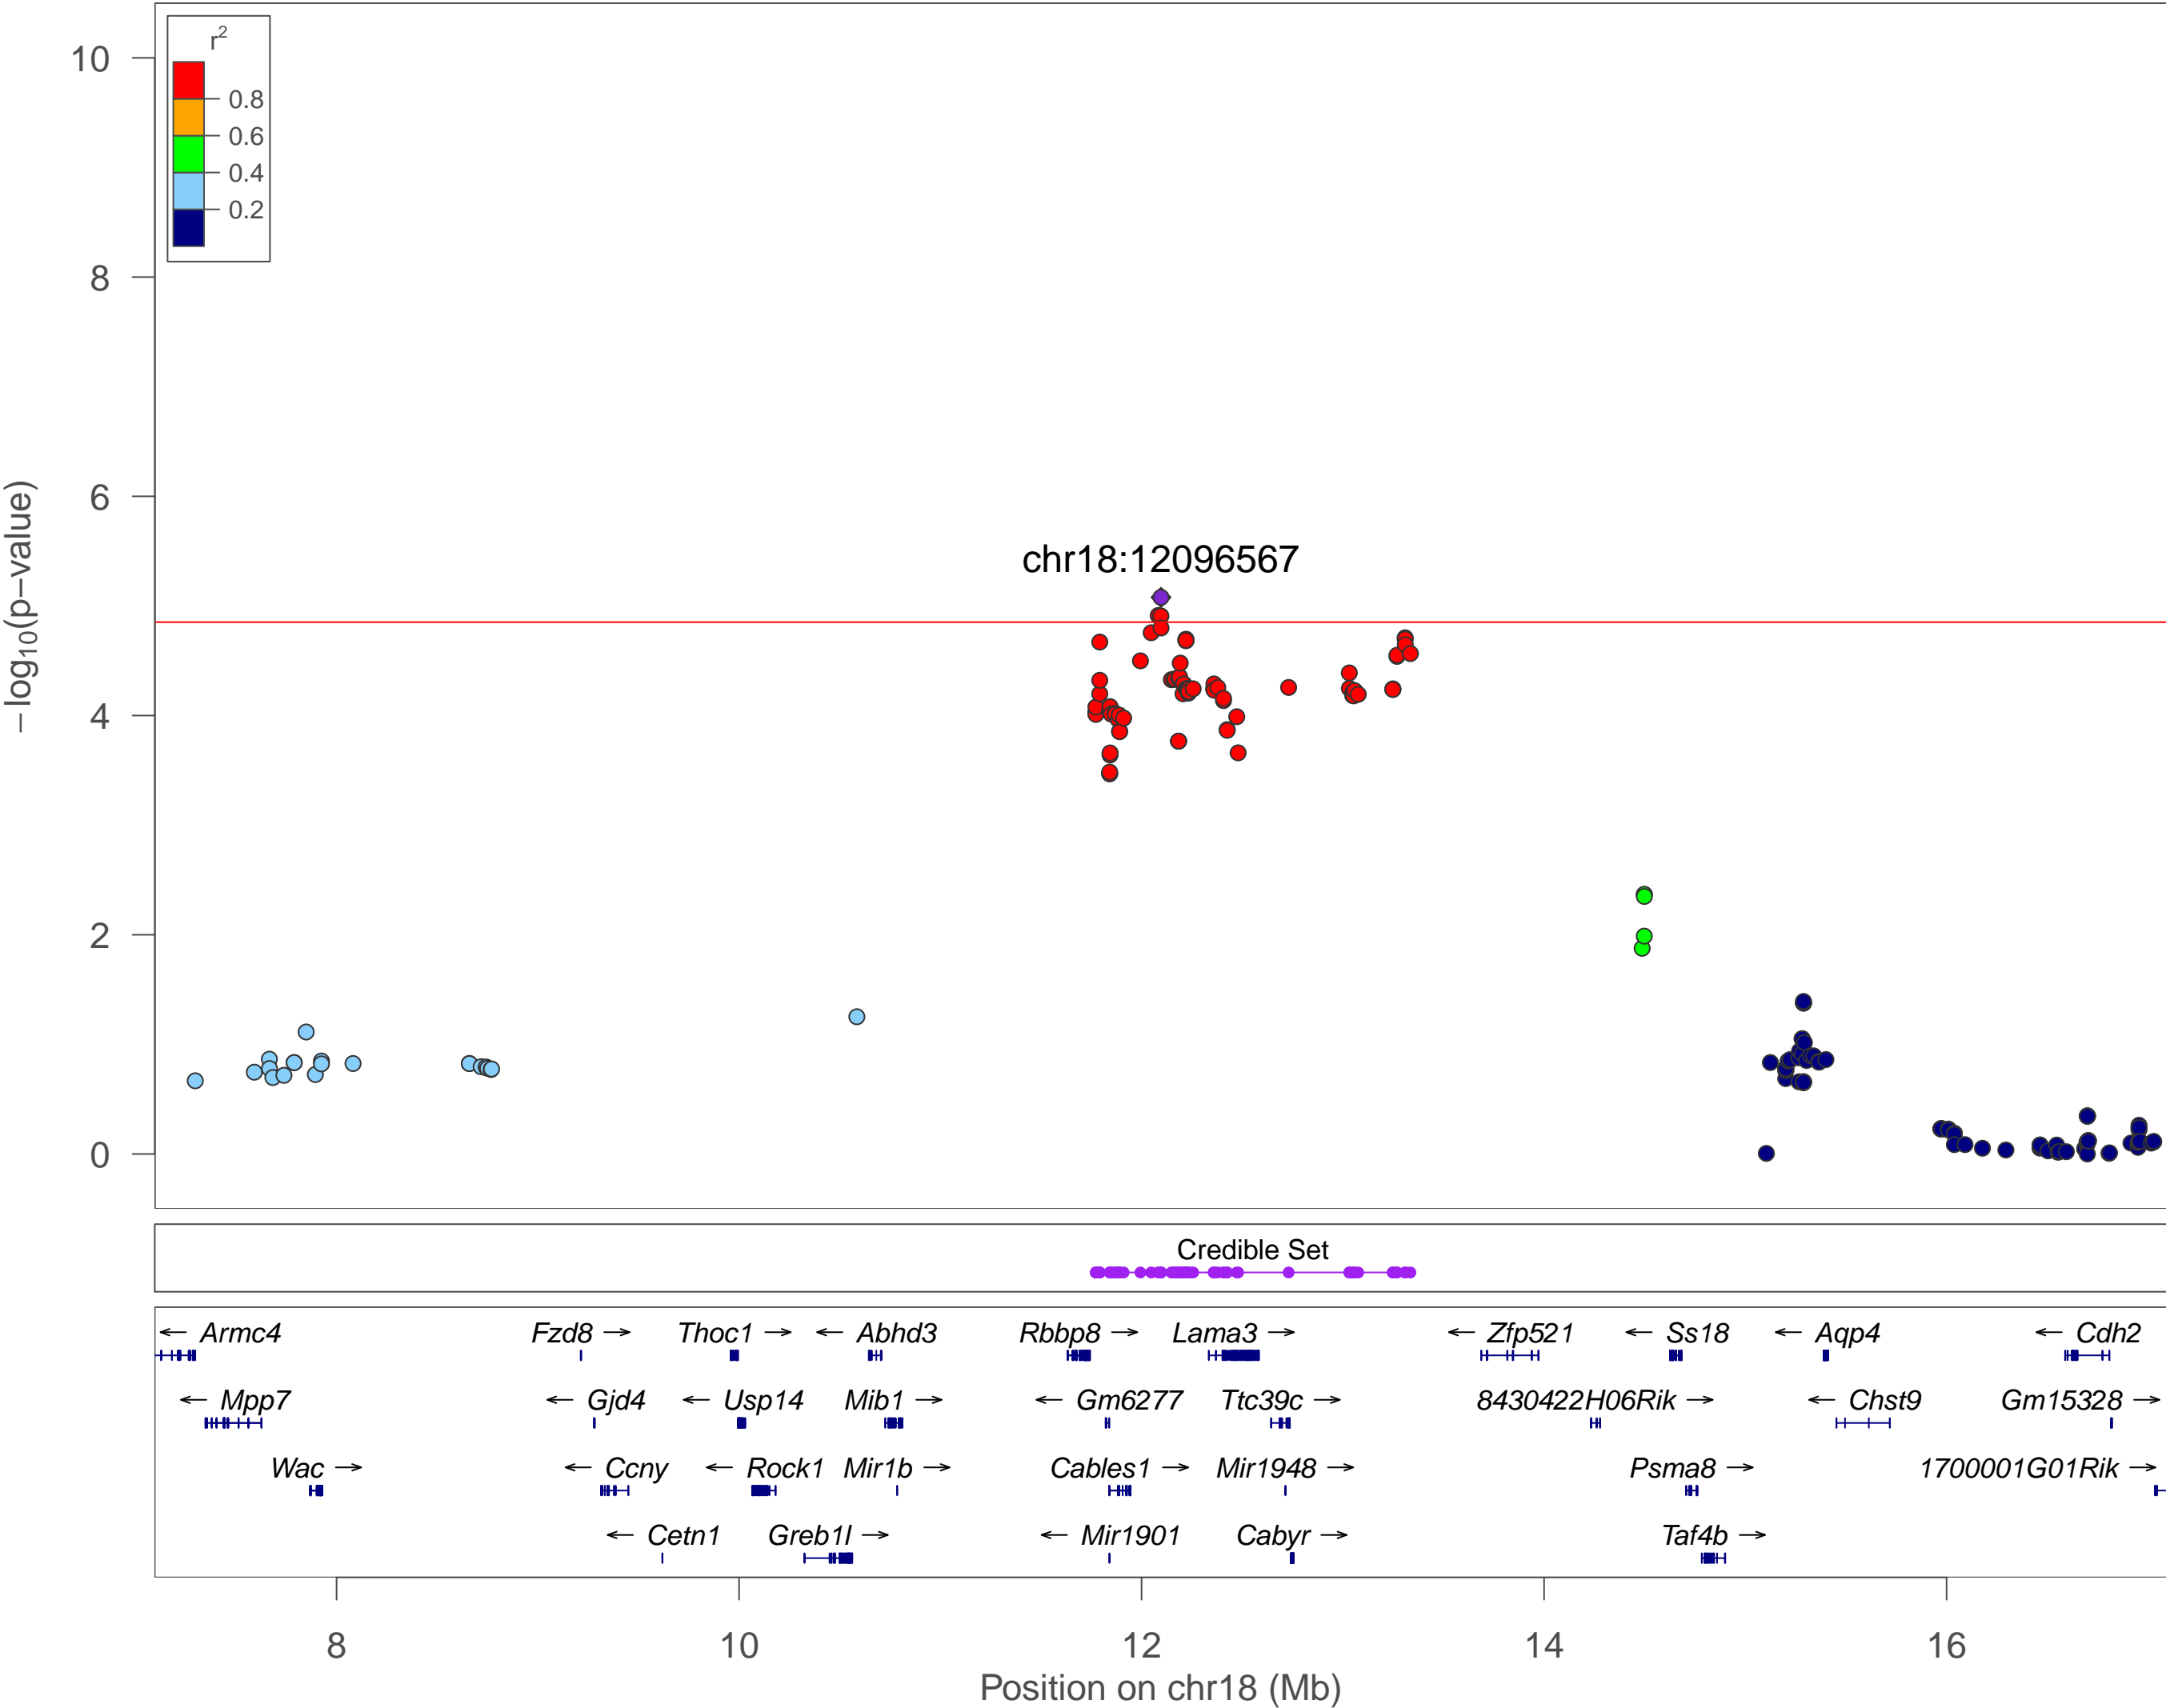

date: Thu Oct 25 17:09:01 2018

build: F34GBS

display range: chr18:7096567–17096567 [7096567–17096567]

hilite range: 0 – 0 [ 0 – 0 ]

reference SNP: chr18:12096567

number of SNPs plotted: 193

min P-value: 8.35E–6 [chr18:12096567]

max P-value: 9.99E–1 [chr18:16699294]

omitted Genes: Colec12, Esco1, Snrpd1

omitted Genes: 4930563E18Rik, Mir133a–1, Mir1a–2

omitted Genes: 1010001N08Rik, Gata6, Tmem241

omitted Genes: Riok3, 3110002H16Rik, Npc1

omitted Genes: Ankrd29, Osbp1a, Impact

omitted Genes: Hrh4, Kctd1, 4933424G05Rik

## Fine-mapping Regions

| snp            | chr | pos (Mb) | pp          | group        | color  |
|----------------|-----|----------|-------------|--------------|--------|
| chr18:11772906 | 18  | 11.77291 | 0.006021185 | Credible Set | purple |
| chr18:11772936 | 18  | 11.77294 | 0.006021185 | Credible Set | purple |
| chr18:11773024 | 18  | 11.77302 | 0.005824685 | Credible Set | purple |
| chr18:11773062 | 18  | 11.77306 | 0.006746175 | Credible Set | purple |
| chr18:11792180 | 18  | 11.79218 | 0.008775780 | Credible Set | purple |
| chr18:11792281 | 18  | 11.79228 | 0.024634261 | Credible Set | purple |
| chr18:11792295 | 18  | 11.79229 | 0.011480610 | Credible Set | purple |
| chr18:11841074 | 18  | 11.84107 | 0.006244823 | Credible Set | purple |
| chr18:11843471 | 18  | 11.84347 | 0.002693669 | Credible Set | purple |
| chr18:11843539 | 18  | 11.84354 | 0.002718494 | Credible Set | purple |
| chr18:11843691 | 18  | 11.84369 | 0.006799667 | Credible Set | purple |
| chr18:11849087 | 18  | 11.84909 | 0.005863858 | Credible Set | purple |
| chr18:11868302 | 18  | 11.86830 | 0.005950931 | Credible Set | purple |
| chr18:11868573 | 18  | 11.86857 | 0.005835239 | Credible Set | purple |
| chr18:11884565 | 18  | 11.88457 | 0.005253571 | Credible Set | purple |
| chr18:11888824 | 18  | 11.88882 | 0.005746699 | Credible Set | purple |
| chr18:11890738 | 18  | 11.89074 | 0.004179073 | Credible Set | purple |
| chr18:11890742 | 18  | 11.89074 | 0.004133836 | Credible Set | purple |
| chr18:11910882 | 18  | 11.91088 | 0.005415126 | Credible Set | purple |
| chr18:11994328 | 18  | 11.99433 | 0.016922237 | Credible Set | purple |
| chr18:12047734 | 18  | 12.04773 | 0.029654538 | Credible Set | purple |
| chr18:12082652 | 18  | 12.08265 | 0.041930306 | Credible Set | purple |
| chr18:12095502 | 18  | 12.09550 | 0.041391823 | Credible Set | purple |
| chr18:12095506 | 18  | 12.09551 | 0.041537419 | Credible Set | purple |
| chr18:12096567 | 18  | 12.09657 | 0.060323772 | Credible Set | purple |
| chr18:12096649 | 18  | 12.09665 | 0.032626185 | Credible Set | purple |
| chr18:12147962 | 18  | 12.14796 | 0.011623939 | Credible Set | purple |
| chr18:12159851 | 18  | 12.15985 | 0.011641308 | Credible Set | purple |
| chr18:12166070 | 18  | 12.16607 | 0.011794411 | Credible Set | purple |
| chr18:12183803 | 18  | 12.18380 | 0.003432600 | Credible Set | purple |
| chr18:12183818 | 18  | 12.18382 | 0.003432600 | Credible Set | purple |
| chr18:12183819 | 18  | 12.18382 | 0.003432600 | Credible Set | purple |
| chr18:12183957 | 18  | 12.18396 | 0.012010534 | Credible Set | purple |
| chr18:12188720 | 18  | 12.18872 | 0.012321028 | Credible Set | purple |
| chr18:12192191 | 18  | 12.19219 | 0.016185138 | Credible Set | purple |
| chr18:12205743 | 18  | 12.20574 | 0.008773730 | Credible Set | purple |

## Fine-mapping Regions

| snp            | chr | pos (Mb) | pp          | group        | color  |
|----------------|-----|----------|-------------|--------------|--------|
| chr18:12209149 | 18  | 12.20915 | 0.010651880 | Credible Set | purple |
| chr18:12209157 | 18  | 12.20916 | 0.010651880 | Credible Set | purple |
| chr18:12220479 | 18  | 12.22048 | 0.025270426 | Credible Set | purple |
| chr18:12220534 | 18  | 12.22053 | 0.026067156 | Credible Set | purple |
| chr18:12220537 | 18  | 12.22054 | 0.025472409 | Credible Set | purple |
| chr18:12220581 | 18  | 12.22058 | 0.009689983 | Credible Set | purple |
| chr18:12228637 | 18  | 12.22864 | 0.009765648 | Credible Set | purple |
| chr18:12232882 | 18  | 12.23288 | 0.008945730 | Credible Set | purple |
| chr18:12232913 | 18  | 12.23291 | 0.008943798 | Credible Set | purple |
| chr18:12232928 | 18  | 12.23293 | 0.008943798 | Credible Set | purple |
| chr18:12232935 | 18  | 12.23293 | 0.008943798 | Credible Set | purple |
| chr18:12233114 | 18  | 12.23311 | 0.009390026 | Credible Set | purple |
| chr18:12233710 | 18  | 12.23371 | 0.009688850 | Credible Set | purple |
| chr18:12233723 | 18  | 12.23372 | 0.009167282 | Credible Set | purple |
| chr18:12256132 | 18  | 12.25613 | 0.009693287 | Credible Set | purple |
| chr18:12358152 | 18  | 12.35815 | 0.009697208 | Credible Set | purple |
| chr18:12359533 | 18  | 12.35953 | 0.010684856 | Credible Set | purple |
| chr18:12359979 | 18  | 12.35998 | 0.009429262 | Credible Set | purple |
| chr18:12378538 | 18  | 12.37854 | 0.009933191 | Credible Set | purple |
| chr18:12406944 | 18  | 12.40694 | 0.007668154 | Credible Set | purple |
| chr18:12406948 | 18  | 12.40695 | 0.008005364 | Credible Set | purple |
| chr18:12425352 | 18  | 12.42535 | 0.004307831 | Credible Set | purple |
| chr18:12425400 | 18  | 12.42540 | 0.004253809 | Credible Set | purple |
| chr18:12473083 | 18  | 12.47308 | 0.005566343 | Credible Set | purple |
| chr18:12479736 | 18  | 12.47974 | 0.002725865 | Credible Set | purple |
| chr18:12730645 | 18  | 12.73065 | 0.009953065 | Credible Set | purple |
| chr18:13032150 | 18  | 13.03215 | 0.013298070 | Credible Set | purple |
| chr18:13032510 | 18  | 13.03251 | 0.009773893 | Credible Set | purple |
| chr18:13049016 | 18  | 13.04902 | 0.008479338 | Credible Set | purple |
| chr18:13049169 | 18  | 13.04917 | 0.008908733 | Credible Set | purple |
| chr18:13053875 | 18  | 13.05387 | 0.008425772 | Credible Set | purple |
| chr18:13058650 | 18  | 13.05865 | 0.009346800 | Credible Set | purple |
| chr18:13076442 | 18  | 13.07644 | 0.008689557 | Credible Set | purple |
| chr18:13248719 | 18  | 13.24872 | 0.009578204 | Credible Set | purple |
| chr18:13248733 | 18  | 13.24873 | 0.009684267 | Credible Set | purple |
| chr18:13248742 | 18  | 13.24874 | 0.009578879 | Credible Set | purple |

Fine-mapping Regions

| snp            | chr | pos (Mb) | pp         | group        | color  |
|----------------|-----|----------|------------|--------------|--------|
| chr18:13269113 | 18  | 13.26911 | 0.01849536 | Credible Set | purple |
| chr18:13269114 | 18  | 13.26911 | 0.01892845 | Credible Set | purple |
| chr18:13309638 | 18  | 13.30964 | 0.02681659 | Credible Set | purple |
| chr18:13310189 | 18  | 13.31019 | 0.02614172 | Credible Set | purple |
| chr18:13310299 | 18  | 13.31030 | 0.02332506 | Credible Set | purple |
| chr18:13335693 | 18  | 13.33569 | 0.01955042 | Credible Set | purple |

# F34 GBS, retic parameters concentration of hemoglobin in reticulocytes, repeat

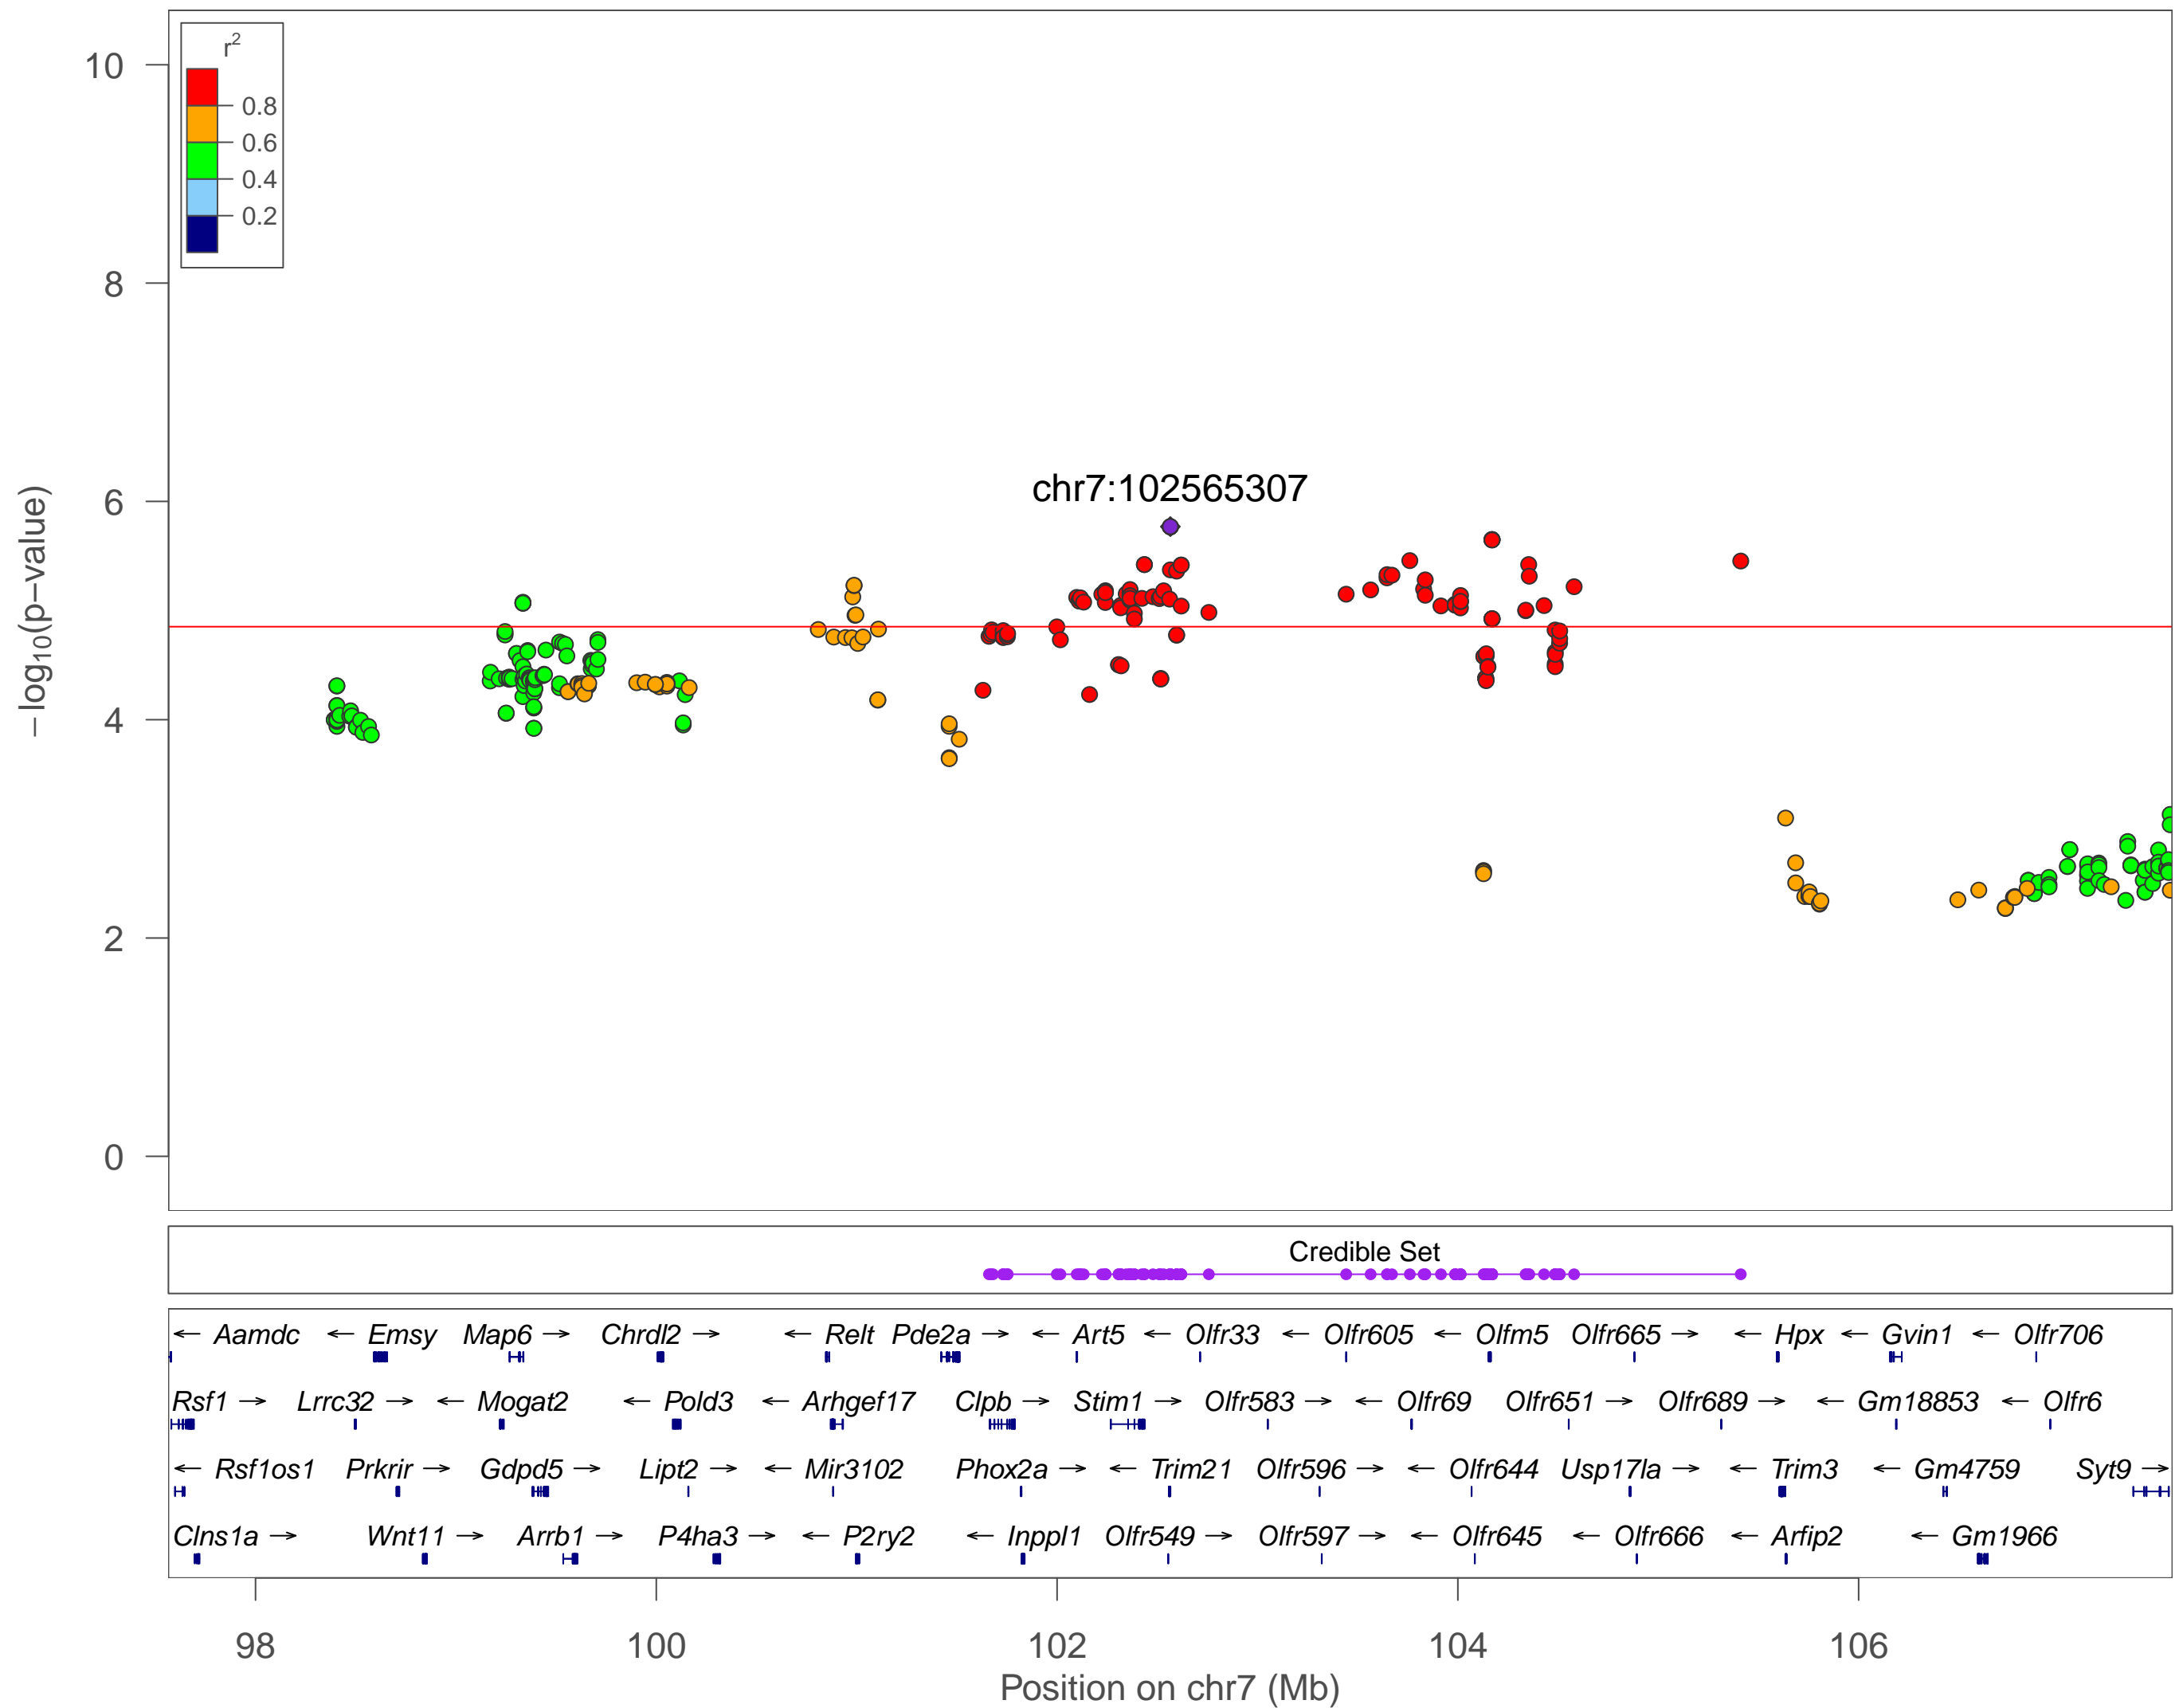

date: Thu Oct 25 17:09:52 2018

build: F34GBS

display range: chr7:97565307–107565307 [97565307–107565307]

hilite range: 0 – 0 [ 0 – 0 ]

reference SNP: chr7:102565307

number of SNPs plotted: 328

min P-value: 1.7E–6 [chr7:102565307]

max P-value: 5.37E–3 [chr7:106732278]

omitted Genes: Aqp11, Pak1, Gdpd4

omitted Genes: Myo7a, Capn5, Omp

omitted Genes: Gm16938, B3gnt6, Acer3

omitted Genes: Tsku, Gucy2d, Uvrag

omitted Genes: Dgat2, Gm26705, Serpinh1

omitted Genes: Kihl35, Rps3, Snord15b

omitted Genes: Snord15a, Mir326, Tpbgl

omitted Genes: Slco2b1, Olfr520, Olfr521

omitted Genes: Neu3, Spcs2, Xrra1

omitted Genes: Rnf169, Kcne3, Pgm2l1

omitted Genes: Gpx2-ps1, Ppme1, C2cd3

omitted Genes: Ucp3, Ucp2, Dnajb13

omitted Genes: Coa4, Mrpl48, Rab6a

omitted Genes: Plekhhb1, Fam168a, P2ry6

omitted Genes: Fchsd2, Atg16l2, Stard10

omitted Genes: Arap1, Mir139, Art2a-ps

omitted Genes: Art2b, Folr2, Folr1

omitted Genes: Anapc15, Tomt, Lamtor1

omitted Genes: Lrrc51, Numa1, Il18bp

omitted Genes: Rnf121, Xndc1, Xntrpc

omitted Genes: Trpc2, Art1, Chrna10

omitted Genes: Nup98, Pgap2, Rhog

omitted Genes: Rrm1, Olfr543, Olfr544

omitted Genes: Olfr545, Olfr547, Olfr550

omitted Genes: Olfr551, Olfr552, Olfr553

omitted Genes: Olfr554, Olfr555, Olfr556

omitted Genes: Trim68, Olfr557, Olfr558

omitted Genes: Olfr559, Olfr78, Olfr560

omitted Genes: Olfr561, Olfr564, Olfr566

omitted Genes: Olfr568, Olfr569, Olfr570

omitted Genes: Olfr571, Olfr572, Olfr573, Olfr574

omitted Genes: Olfr575, Olfr576, Olfr577

Make more plots at <http://csg.sph.umich.edu/locuszoom/>



## Fine-mapping Regions

| snp            | chr | pos (Mb) | pp          | group        | color  |
|----------------|-----|----------|-------------|--------------|--------|
| chr7:101660383 | 7   | 101.6604 | 0.003627064 | Credible Set | purple |
| chr7:101669186 | 7   | 101.6692 | 0.003798908 | Credible Set | purple |
| chr7:101673483 | 7   | 101.6735 | 0.004132179 | Credible Set | purple |
| chr7:101680140 | 7   | 101.6801 | 0.003933425 | Credible Set | purple |
| chr7:101731061 | 7   | 101.7311 | 0.003544125 | Credible Set | purple |
| chr7:101731110 | 7   | 101.7311 | 0.003750966 | Credible Set | purple |
| chr7:101731130 | 7   | 101.7311 | 0.004069510 | Credible Set | purple |
| chr7:101731658 | 7   | 101.7317 | 0.003561151 | Credible Set | purple |
| chr7:101751790 | 7   | 101.7518 | 0.003597891 | Credible Set | purple |
| chr7:101752580 | 7   | 101.7526 | 0.003753693 | Credible Set | purple |
| chr7:101752971 | 7   | 101.7530 | 0.003846105 | Credible Set | purple |
| chr7:101998679 | 7   | 101.9987 | 0.004387980 | Credible Set | purple |
| chr7:102016307 | 7   | 102.0163 | 0.003382431 | Credible Set | purple |
| chr7:102098054 | 7   | 102.0981 | 0.007941011 | Credible Set | purple |
| chr7:102110109 | 7   | 102.1101 | 0.007486550 | Credible Set | purple |
| chr7:102110501 | 7   | 102.1105 | 0.007364089 | Credible Set | purple |
| chr7:102116318 | 7   | 102.1163 | 0.007691085 | Credible Set | purple |
| chr7:102116430 | 7   | 102.1164 | 0.007691085 | Credible Set | purple |
| chr7:102116478 | 7   | 102.1165 | 0.007875812 | Credible Set | purple |
| chr7:102132562 | 7   | 102.1326 | 0.007226850 | Credible Set | purple |
| chr7:102223396 | 7   | 102.2234 | 0.008459887 | Credible Set | purple |
| chr7:102240695 | 7   | 102.2407 | 0.007171970 | Credible Set | purple |
| chr7:102241191 | 7   | 102.2412 | 0.009094255 | Credible Set | purple |
| chr7:102241211 | 7   | 102.2412 | 0.008875089 | Credible Set | purple |
| chr7:102241212 | 7   | 102.2412 | 0.008744206 | Credible Set | purple |
| chr7:102306968 | 7   | 102.3070 | 0.002045277 | Credible Set | purple |
| chr7:102306978 | 7   | 102.3070 | 0.002058335 | Credible Set | purple |
| chr7:102317213 | 7   | 102.3172 | 0.006754915 | Credible Set | purple |
| chr7:102317246 | 7   | 102.3172 | 0.006440559 | Credible Set | purple |
| chr7:102319586 | 7   | 102.3196 | 0.002006137 | Credible Set | purple |
| chr7:102344970 | 7   | 102.3450 | 0.008527618 | Credible Set | purple |
| chr7:102363897 | 7   | 102.3639 | 0.007541180 | Credible Set | purple |
| chr7:102364204 | 7   | 102.3642 | 0.008696024 | Credible Set | purple |
| chr7:102364223 | 7   | 102.3642 | 0.009309070 | Credible Set | purple |
| chr7:102364315 | 7   | 102.3643 | 0.008205520 | Credible Set | purple |
| chr7:102364326 | 7   | 102.3643 | 0.008205520 | Credible Set | purple |

## Fine-mapping Regions

| snp            | chr | pos (Mb) | pp          | group        | color  |
|----------------|-----|----------|-------------|--------------|--------|
| chr7:102364411 | 7   | 102.3644 | 0.007791140 | Credible Set | purple |
| chr7:102385520 | 7   | 102.3855 | 0.005772189 | Credible Set | purple |
| chr7:102385536 | 7   | 102.3855 | 0.005140265 | Credible Set | purple |
| chr7:102423165 | 7   | 102.4232 | 0.007792384 | Credible Set | purple |
| chr7:102435692 | 7   | 102.4357 | 0.015407884 | Credible Set | purple |
| chr7:102435720 | 7   | 102.4357 | 0.015407884 | Credible Set | purple |
| chr7:102478469 | 7   | 102.4785 | 0.008058391 | Credible Set | purple |
| chr7:102510475 | 7   | 102.5105 | 0.007789352 | Credible Set | purple |
| chr7:102510607 | 7   | 102.5106 | 0.007777162 | Credible Set | purple |
| chr7:102516878 | 7   | 102.5169 | 0.008097979 | Credible Set | purple |
| chr7:102531652 | 7   | 102.5317 | 0.009075918 | Credible Set | purple |
| chr7:102561708 | 7   | 102.5617 | 0.007676879 | Credible Set | purple |
| chr7:102565262 | 7   | 102.5653 | 0.033181471 | Credible Set | purple |
| chr7:102565292 | 7   | 102.5653 | 0.033077596 | Credible Set | purple |
| chr7:102565307 | 7   | 102.5653 | 0.033239383 | Credible Set | purple |
| chr7:102565323 | 7   | 102.5653 | 0.033135343 | Credible Set | purple |
| chr7:102565329 | 7   | 102.5653 | 0.033135343 | Credible Set | purple |
| chr7:102565410 | 7   | 102.5654 | 0.013851517 | Credible Set | purple |
| chr7:102596442 | 7   | 102.5964 | 0.013508339 | Credible Set | purple |
| chr7:102596578 | 7   | 102.5966 | 0.003709545 | Credible Set | purple |
| chr7:102596636 | 7   | 102.5966 | 0.003731657 | Credible Set | purple |
| chr7:102619418 | 7   | 102.6194 | 0.015282756 | Credible Set | purple |
| chr7:102619431 | 7   | 102.6194 | 0.015245355 | Credible Set | purple |
| chr7:102619466 | 7   | 102.6195 | 0.006671488 | Credible Set | purple |
| chr7:102757499 | 7   | 102.7575 | 0.005869542 | Credible Set | purple |
| chr7:103442570 | 7   | 103.4426 | 0.008474361 | Credible Set | purple |
| chr7:103564836 | 7   | 103.5648 | 0.009243209 | Credible Set | purple |
| chr7:103646439 | 7   | 103.6464 | 0.011785582 | Credible Set | purple |
| chr7:103646709 | 7   | 103.6467 | 0.012579214 | Credible Set | purple |
| chr7:103671033 | 7   | 103.6710 | 0.012439283 | Credible Set | purple |
| chr7:103760301 | 7   | 103.7603 | 0.016704753 | Credible Set | purple |
| chr7:103829200 | 7   | 103.8292 | 0.009393752 | Credible Set | purple |
| chr7:103837099 | 7   | 103.8371 | 0.011314582 | Credible Set | purple |
| chr7:103837213 | 7   | 103.8372 | 0.008296113 | Credible Set | purple |
| chr7:103915503 | 7   | 103.9155 | 0.006691495 | Credible Set | purple |
| chr7:103986792 | 7   | 103.9868 | 0.006921892 | Credible Set | purple |

## Fine-mapping Regions

| snp            | chr | pos (Mb) | pp          | group        | color  |
|----------------|-----|----------|-------------|--------------|--------|
| chr7:103986795 | 7   | 103.9868 | 0.006921892 | Credible Set | purple |
| chr7:103986857 | 7   | 103.9869 | 0.006799078 | Credible Set | purple |
| chr7:103986860 | 7   | 103.9869 | 0.006799078 | Credible Set | purple |
| chr7:104012808 | 7   | 104.0128 | 0.006426842 | Credible Set | purple |
| chr7:104013370 | 7   | 104.0134 | 0.007306969 | Credible Set | purple |
| chr7:104013395 | 7   | 104.0134 | 0.008257676 | Credible Set | purple |
| chr7:104013467 | 7   | 104.0135 | 0.007341014 | Credible Set | purple |
| chr7:104129734 | 7   | 104.1297 | 0.002420744 | Credible Set | purple |
| chr7:104129736 | 7   | 104.1297 | 0.002420744 | Credible Set | purple |
| chr7:104138934 | 7   | 104.1389 | 0.001563108 | Credible Set | purple |
| chr7:104138936 | 7   | 104.1389 | 0.001569981 | Credible Set | purple |
| chr7:104138968 | 7   | 104.1390 | 0.001569981 | Credible Set | purple |
| chr7:104141705 | 7   | 104.1417 | 0.002456362 | Credible Set | purple |
| chr7:104141768 | 7   | 104.1418 | 0.002557425 | Credible Set | purple |
| chr7:104149893 | 7   | 104.1499 | 0.001981653 | Credible Set | purple |
| chr7:104149911 | 7   | 104.1499 | 0.001956598 | Credible Set | purple |
| chr7:104170479 | 7   | 104.1705 | 0.025445446 | Credible Set | purple |
| chr7:104170506 | 7   | 104.1705 | 0.025541514 | Credible Set | purple |
| chr7:104170518 | 7   | 104.1705 | 0.025630712 | Credible Set | purple |
| chr7:104170522 | 7   | 104.1705 | 0.025495253 | Credible Set | purple |
| chr7:104170543 | 7   | 104.1705 | 0.025338308 | Credible Set | purple |
| chr7:104170588 | 7   | 104.1706 | 0.005141288 | Credible Set | purple |
| chr7:104170594 | 7   | 104.1706 | 0.005149984 | Credible Set | purple |
| chr7:104170618 | 7   | 104.1706 | 0.005173026 | Credible Set | purple |
| chr7:104170662 | 7   | 104.1707 | 0.005173026 | Credible Set | purple |
| chr7:104338784 | 7   | 104.3388 | 0.006073698 | Credible Set | purple |
| chr7:104338810 | 7   | 104.3388 | 0.006144848 | Credible Set | purple |
| chr7:104353491 | 7   | 104.3535 | 0.015423013 | Credible Set | purple |
| chr7:104356230 | 7   | 104.3562 | 0.012184128 | Credible Set | purple |
| chr7:104430205 | 7   | 104.4302 | 0.006738007 | Credible Set | purple |
| chr7:104485236 | 7   | 104.4852 | 0.004117339 | Credible Set | purple |
| chr7:104485721 | 7   | 104.4857 | 0.002084849 | Credible Set | purple |
| chr7:104485727 | 7   | 104.4857 | 0.001972437 | Credible Set | purple |
| chr7:104486022 | 7   | 104.4860 | 0.002643835 | Credible Set | purple |
| chr7:104486041 | 7   | 104.4860 | 0.002527621 | Credible Set | purple |
| chr7:104507724 | 7   | 104.5077 | 0.003161793 | Credible Set | purple |

Fine-mapping Regions

| snp            | chr | pos (Mb) | pp          | group        | color  |
|----------------|-----|----------|-------------|--------------|--------|
| chr7:104508127 | 7   | 104.5081 | 0.003467483 | Credible Set | purple |
| chr7:104508173 | 7   | 104.5082 | 0.004039979 | Credible Set | purple |
| chr7:104580091 | 7   | 104.5801 | 0.009856371 | Credible Set | purple |
| chr7:105411752 | 7   | 105.4118 | 0.016563255 | Credible Set | purple |

# F34 GBS, retic parameters concentration of hemoglobin in reticulocytes, repeat

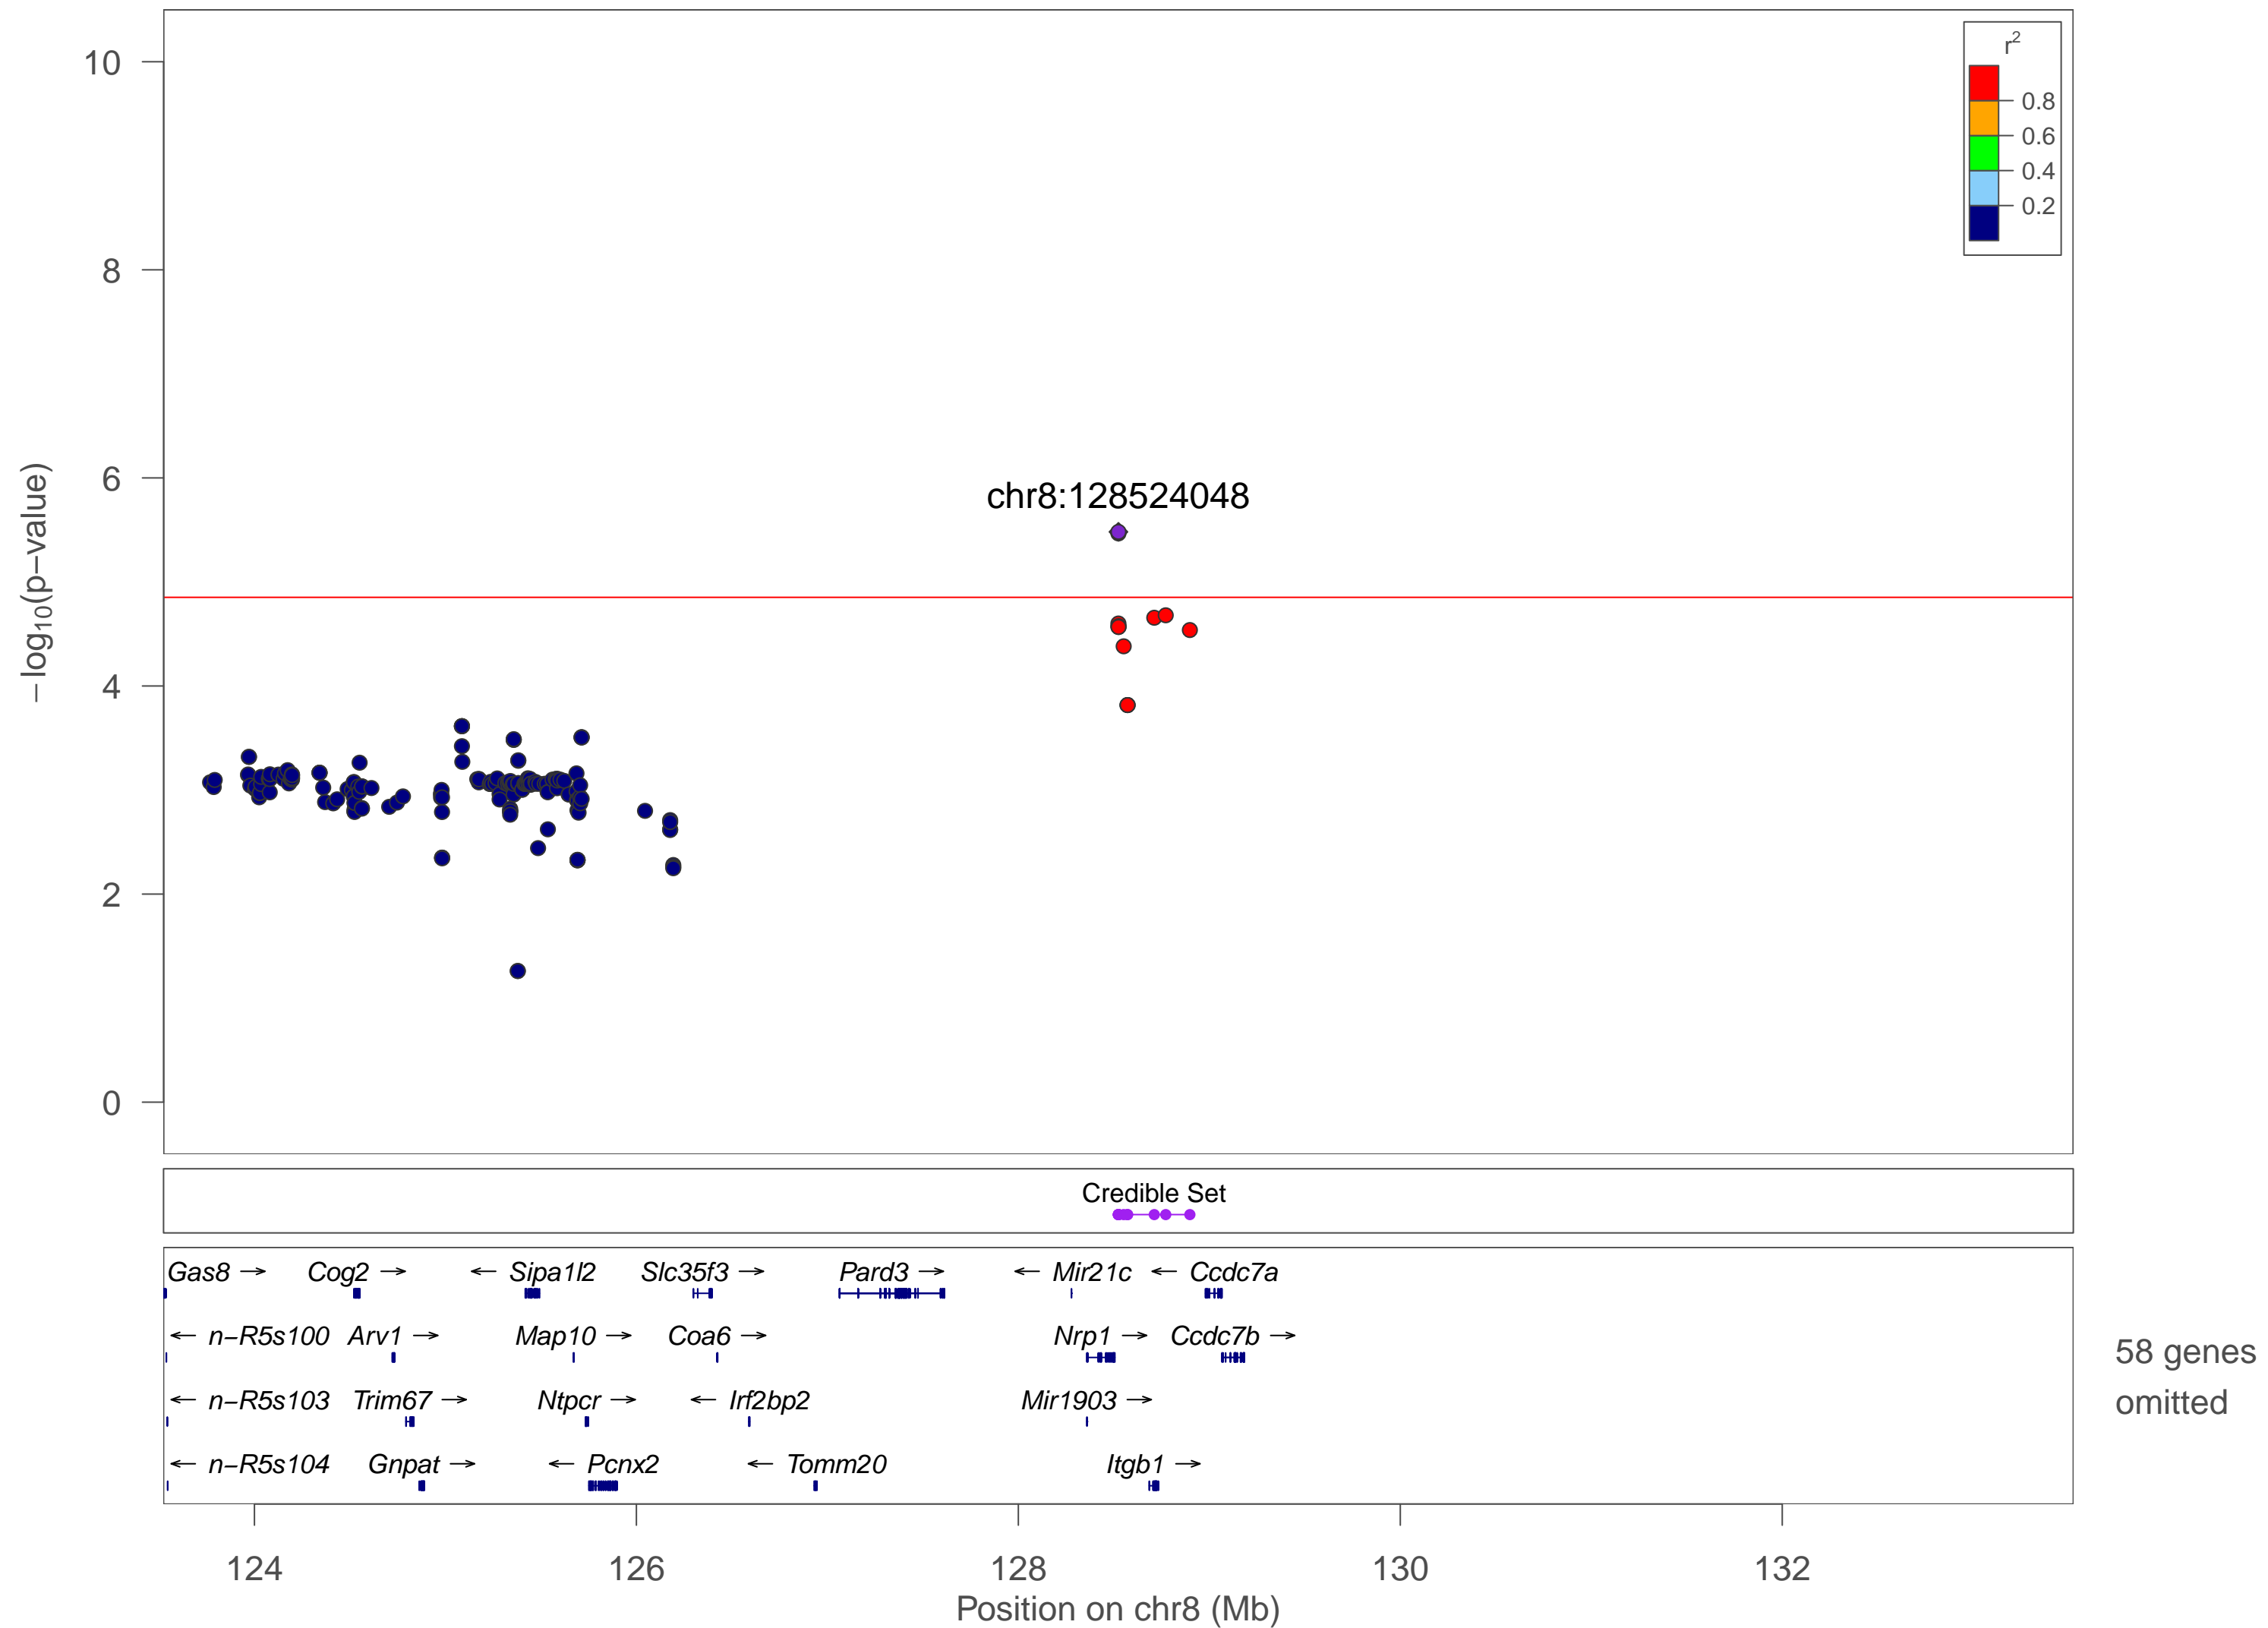

date: Thu Oct 25 17:10:03 2018  
build: F34GBS  
display range: chr8:123524048–133524048 [123524048–133524048]  
hilite range: 0 – 0 [ 0 – 0 ]  
reference SNP: chr8:128524048  
number of SNPs plotted: 191  
min P-value: 3.3E–6 [chr8:128524048]  
max P-value: 5.49E–2 [chr8:125378859]  
omitted Genes: n-R5s105, n-R5s108, n-R5s110  
omitted Genes: n-R5s111, n-R5s113, Gm25018  
omitted Genes: n-R5s117, n-R5s121, n-R5s122  
omitted Genes: n-R5s123, n-R5s124, n-R5s128  
omitted Genes: Gm26391, n-R5s133, n-R5s134  
omitted Genes: Rn5s, n-R5s136, n-R5s138  
omitted Genes: n-R5s139, Gm22109, n-R5s141  
omitted Genes: n-R5s142, n-R5s143, n-R5s144  
omitted Genes: Gm25212, n-R5s146, Gm22291  
omitted Genes: Gm23284, n-R5s149, Rhou  
omitted Genes: 6030466F02Rik, Rab4a, Ccsap  
omitted Genes: Acta1, Nup133, Abcb10  
omitted Genes: Taf5l, Mir1967, Urb2  
omitted Genes: Galnt2, Pgbd5, Agt  
omitted Genes: Capn9, 2310022B05Rik, Ttc13  
omitted Genes: Fam89a, 2810004N23Rik, Exoc8  
omitted Genes: Sprtn, Egl1, Tsnax  
omitted Genes: Disc1, 4930567H12Rik, BC021891  
omitted Genes: Kcnk1, Gm17296, Rbm34  
omitted Genes: 2610044O15Rik8

Fine-mapping Regions

| snp            | chr | pos (Mb) | pp          | group        | color  |
|----------------|-----|----------|-------------|--------------|--------|
| chr8:128523972 | 8   | 128.5240 | 0.034880237 | Credible Set | purple |
| chr8:128524047 | 8   | 128.5240 | 0.239175550 | Credible Set | purple |
| chr8:128524048 | 8   | 128.5240 | 0.241911261 | Credible Set | purple |
| chr8:128524081 | 8   | 128.5241 | 0.234379335 | Credible Set | purple |
| chr8:128524424 | 8   | 128.5244 | 0.032999835 | Credible Set | purple |
| chr8:128524425 | 8   | 128.5244 | 0.032459243 | Credible Set | purple |
| chr8:128524441 | 8   | 128.5244 | 0.032395507 | Credible Set | purple |
| chr8:128551483 | 8   | 128.5515 | 0.021594105 | Credible Set | purple |
| chr8:128571869 | 8   | 128.5719 | 0.006315692 | Credible Set | purple |
| chr8:128571887 | 8   | 128.5719 | 0.006317955 | Credible Set | purple |
| chr8:128711717 | 8   | 128.7117 | 0.039387863 | Credible Set | purple |
| chr8:128771719 | 8   | 128.7717 | 0.041469323 | Credible Set | purple |
| chr8:128898075 | 8   | 128.8981 | 0.030398403 | Credible Set | purple |

# F34 GBS, retic parameters concentration of hemoglobin in reticulocytes, repeat

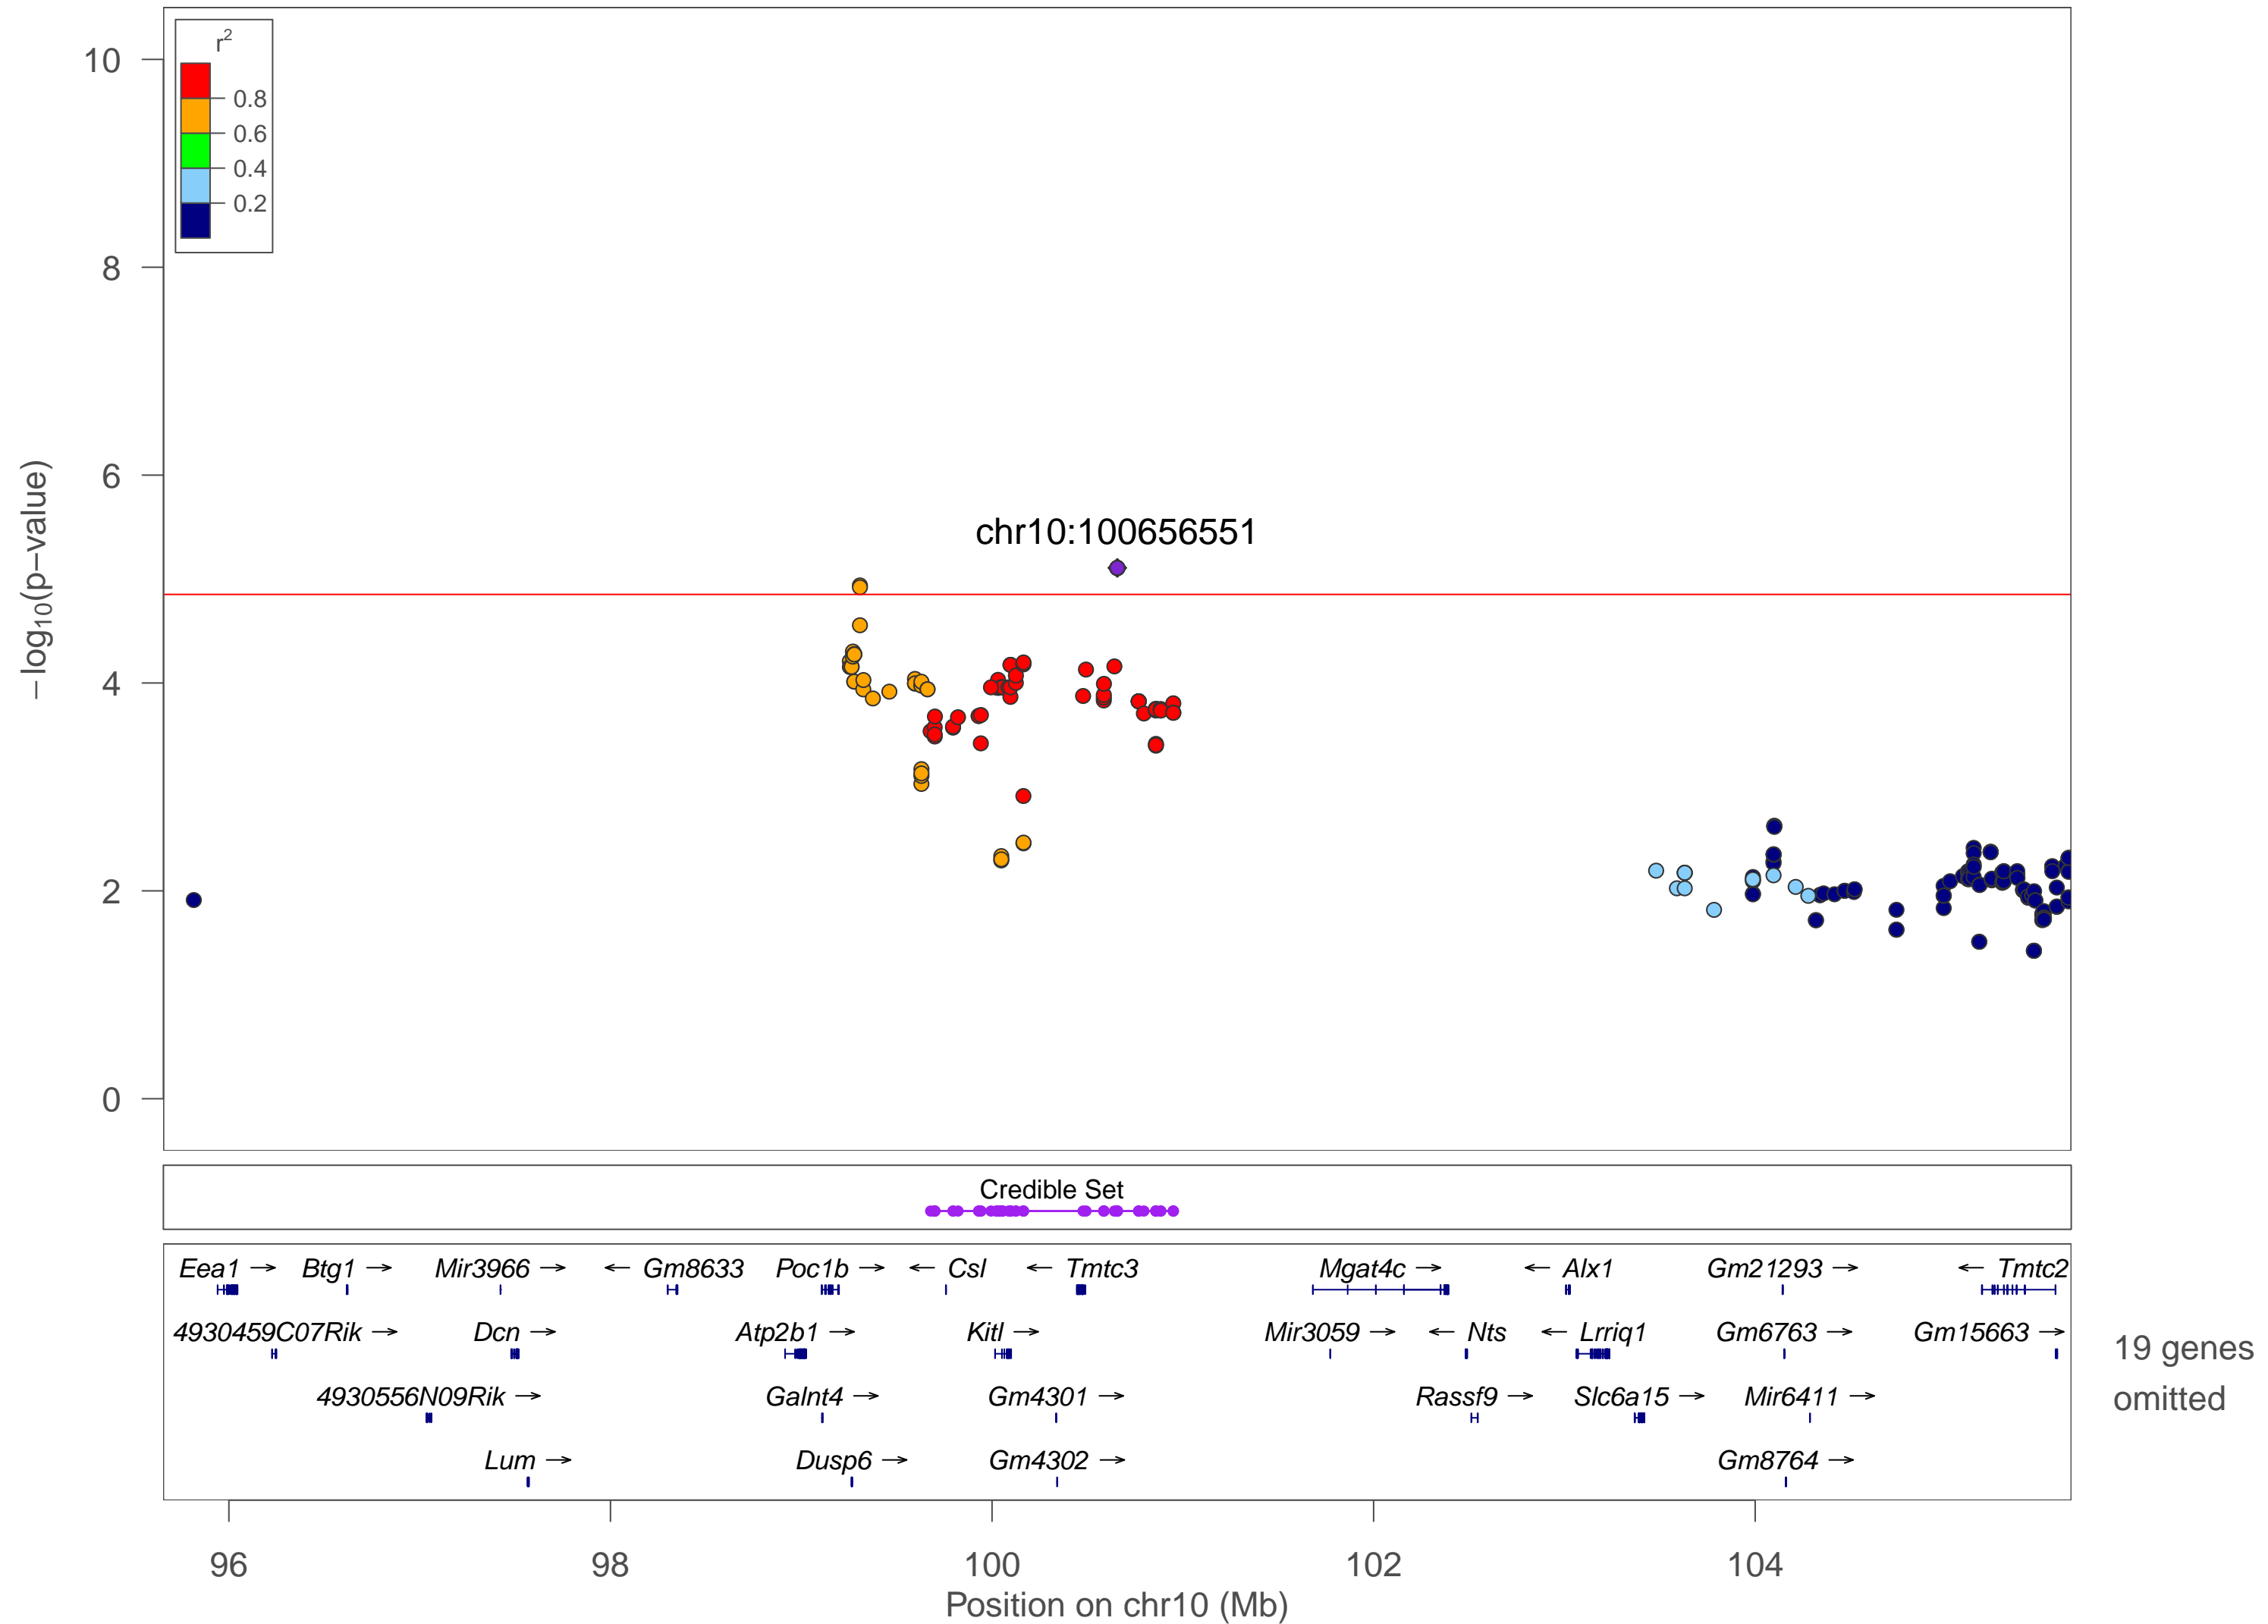



date: Thu Oct 25 17:09:37 2018

build: F34GBS

display range: chr10:95656551–105656551 [95656551–105656551]

hilite range: 0 – 0 [ 0 – 0 ]

reference SNP: chr10:100656551

number of SNPs plotted: 225

min P-value: 7.81E–6 [chr10:100656551]

max P-value: 3.77E–2 [chr10:105460999]

omitted Genes: 4930473O22Rik, Kera, Epyc

omitted Genes: Gm10754, Ccer1, 4930525C09Rik

omitted Genes: Gm20110, Gm18409, Gm4303

omitted Genes: Gm4305, Gm4307, Gm4312

omitted Genes: Cep290, 4930430F08Rik, 1700017N19Rik

omitted Genes: Gm21304, Gm21312, Gm20765

omitted Genes: Gm4340

## Fine-mapping Regions

| snp             | chr | pos (Mb)  | pp          | group        | color  |
|-----------------|-----|-----------|-------------|--------------|--------|
| chr10:99678204  | 10  | 99.67820  | 0.004298973 | Credible Set | purple |
| chr10:99699271  | 10  | 99.69927  | 0.004660097 | Credible Set | purple |
| chr10:99699649  | 10  | 99.69965  | 0.003854211 | Credible Set | purple |
| chr10:99699681  | 10  | 99.69968  | 0.004015350 | Credible Set | purple |
| chr10:99700646  | 10  | 99.70065  | 0.005837839 | Credible Set | purple |
| chr10:99795502  | 10  | 99.79550  | 0.004627611 | Credible Set | purple |
| chr10:99795653  | 10  | 99.79565  | 0.004743422 | Credible Set | purple |
| chr10:99821621  | 10  | 99.82162  | 0.005760589 | Credible Set | purple |
| chr10:99929872  | 10  | 99.92987  | 0.005890544 | Credible Set | purple |
| chr10:99930010  | 10  | 99.93001  | 0.005890544 | Credible Set | purple |
| chr10:99941189  | 10  | 99.94119  | 0.003340836 | Credible Set | purple |
| chr10:99941475  | 10  | 99.94147  | 0.006026726 | Credible Set | purple |
| chr10:99994442  | 10  | 99.99444  | 0.010730144 | Credible Set | purple |
| chr10:100020266 | 10  | 100.02027 | 0.010730144 | Credible Set | purple |
| chr10:100031418 | 10  | 100.03142 | 0.010638926 | Credible Set | purple |
| chr10:100031691 | 10  | 100.03169 | 0.012572651 | Credible Set | purple |
| chr10:100048262 | 10  | 100.04826 | 0.010730144 | Credible Set | purple |
| chr10:100048350 | 10  | 100.04835 | 0.010730144 | Credible Set | purple |
| chr10:100048362 | 10  | 100.04836 | 0.010730144 | Credible Set | purple |
| chr10:100055412 | 10  | 100.05541 | 0.010730144 | Credible Set | purple |
| chr10:100055418 | 10  | 100.05542 | 0.010730144 | Credible Set | purple |
| chr10:100086663 | 10  | 100.08666 | 0.010730144 | Credible Set | purple |
| chr10:100096296 | 10  | 100.09630 | 0.008784845 | Credible Set | purple |
| chr10:100096708 | 10  | 100.09671 | 0.010730144 | Credible Set | purple |
| chr10:100096785 | 10  | 100.09678 | 0.017141778 | Credible Set | purple |
| chr10:100096807 | 10  | 100.09681 | 0.017141778 | Credible Set | purple |
| chr10:100124479 | 10  | 100.12448 | 0.011740000 | Credible Set | purple |
| chr10:100125049 | 10  | 100.12505 | 0.013687694 | Credible Set | purple |
| chr10:100164149 | 10  | 100.16415 | 0.017387467 | Credible Set | purple |
| chr10:100164180 | 10  | 100.16418 | 0.017387467 | Credible Set | purple |
| chr10:100164914 | 10  | 100.16491 | 0.018170173 | Credible Set | purple |
| chr10:100477167 | 10  | 100.47717 | 0.008971417 | Credible Set | purple |
| chr10:100492319 | 10  | 100.49232 | 0.015603728 | Credible Set | purple |
| chr10:100585564 | 10  | 100.58556 | 0.008164326 | Credible Set | purple |
| chr10:100585784 | 10  | 100.58578 | 0.008664857 | Credible Set | purple |
| chr10:100585854 | 10  | 100.58585 | 0.009166375 | Credible Set | purple |

Fine-mapping Regions

| snp             | chr | pos (Mb) | pp          | group        | color  |
|-----------------|-----|----------|-------------|--------------|--------|
| chr10:100586507 | 10  | 100.5865 | 0.011522590 | Credible Set | purple |
| chr10:100641295 | 10  | 100.6413 | 0.016671266 | Credible Set | purple |
| chr10:100656540 | 10  | 100.6565 | 0.129487316 | Credible Set | purple |
| chr10:100656551 | 10  | 100.6566 | 0.129487316 | Credible Set | purple |
| chr10:100656588 | 10  | 100.6566 | 0.129487316 | Credible Set | purple |
| chr10:100656608 | 10  | 100.6566 | 0.129487316 | Credible Set | purple |
| chr10:100768688 | 10  | 100.7687 | 0.008010499 | Credible Set | purple |
| chr10:100768699 | 10  | 100.7687 | 0.008010499 | Credible Set | purple |
| chr10:100768710 | 10  | 100.7687 | 0.008010499 | Credible Set | purple |
| chr10:100768727 | 10  | 100.7687 | 0.008010499 | Credible Set | purple |
| chr10:100795827 | 10  | 100.7958 | 0.006228734 | Credible Set | purple |
| chr10:100858643 | 10  | 100.8586 | 0.006609795 | Credible Set | purple |
| chr10:100858698 | 10  | 100.8587 | 0.006855285 | Credible Set | purple |
| chr10:100858701 | 10  | 100.8587 | 0.006783238 | Credible Set | purple |
| chr10:100858992 | 10  | 100.8590 | 0.003308385 | Credible Set | purple |
| chr10:100884062 | 10  | 100.8841 | 0.006819065 | Credible Set | purple |
| chr10:100884636 | 10  | 100.8846 | 0.006609795 | Credible Set | purple |
| chr10:100949966 | 10  | 100.9500 | 0.007673860 | Credible Set | purple |
| chr10:100950077 | 10  | 100.9501 | 0.006319673 | Credible Set | purple |
| chr10:100950118 | 10  | 100.9501 | 0.006319673 | Credible Set | purple |

F34 GBS, retic parameters cell hemoglobin distribution width, repeat

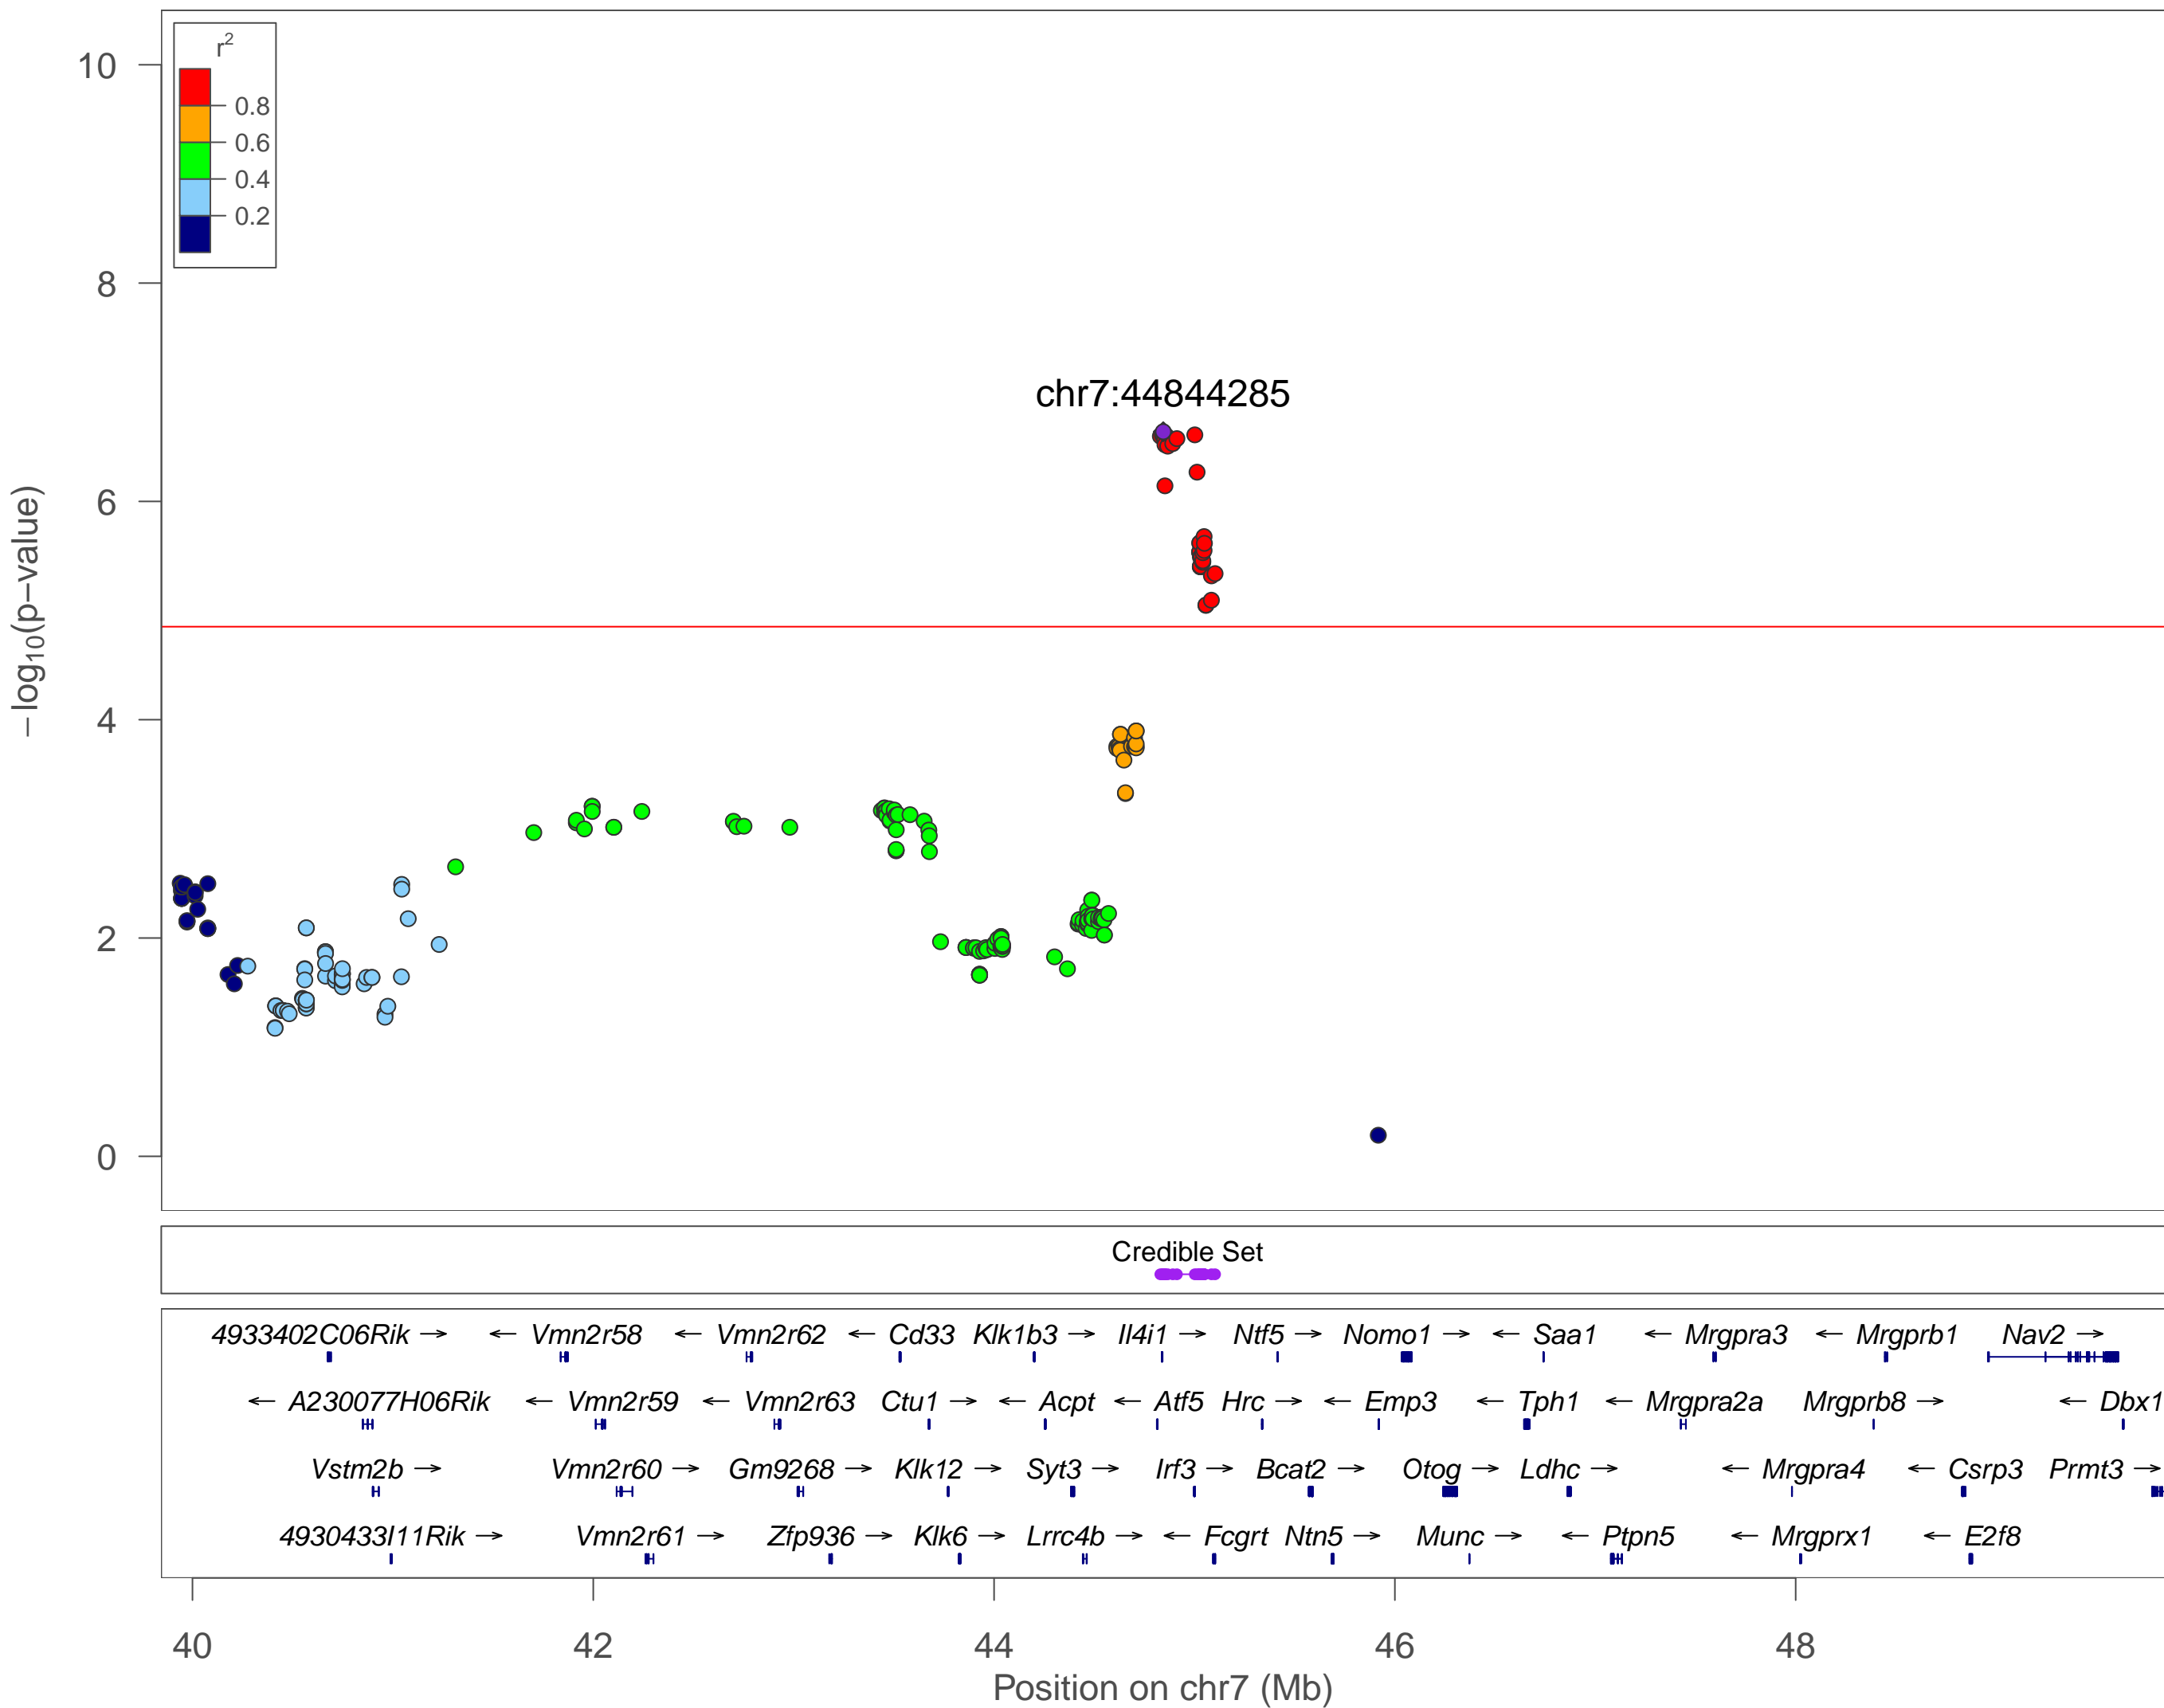

date: Thu Oct 25 17:10:30 2018

build: F34GBS

display range: chr7:39844285–49844285 [39844285–49844285]

hilite range: 0 – 0 [ 0 – 0 ]

reference SNP: chr7:44844285

number of SNPs plotted: 247

min P-value: 2.3E–7 [chr7:44844285]

max P-value: 6.41E–1 [chr7:45917340]

omitted Genes: Gm4884, 1700110I07Rik, Gm5592

omitted Genes: AI987944, Vmn2r57, AW146154

omitted Genes: Zfp788, Vmn2r-ps54, Vmn2r-ps60

omitted Genes: 4933421I07Rik, Zfp141, 9830147E19Rik

omitted Genes: Gm5595, Gm2381, EU599041

omitted Genes: Zfp715, Siglecf, Siglecg

omitted Genes: Lim2, Nkg7, Cldnd2

omitted Genes: Etfb, Mir7051, Vsig10l

omitted Genes: Iglon5, 4931406B18Rik, Zfp658

omitted Genes: Zfp719, Zfp819, Ceacam18

omitted Genes: Siglece, Klk14, Klk13

omitted Genes: 2310002F09Rik, Klk11, Klk10

omitted Genes: Klk9, Klk8, Klk7

omitted Genes: Klk5, Klk4, Klk15

omitted Genes: Klk1b7-ps, Klk1b8, Klk1b1

omitted Genes: Klk1b9, Klk1b11, Klk1b26

omitted Genes: Klk1b27, Klk1b21, Klk1b22

omitted Genes: Klk1b16, Klk1b24, Klk1b4

omitted Genes: Klk1b5, Klk1, 1700028J19Rik

omitted Genes: 2410002F23Rik, Snord88c, Snord88a

omitted Genes: Clec11a, Shank1, 1700008O03Rik

omitted Genes: Aspdh, Josd2, Mir7052

omitted Genes: 5430431A17Rik, Emc10, Fam71e1

omitted Genes: Mybpc2, Spib, Pold1

omitted Genes: Mir7053, Nr1h2, Napsa

omitted Genes: Kcnc3, Myh14, Izumo2

omitted Genes: Zfp473, Vrk3, Nup62

omitted Genes: Gm21948, Tbc1d17, Akt1s1

omitted Genes: Mir707, Pnkp, Ptov1

omitted Genes: Med25, Fuz, Ap2a1

omitted Genes: Tsks, Cpt1c, Prrm1

omitted Genes: Gm15545, Rpl2l12, Scf1

Make more plots at <http://csg.sph.umich.edu/locuszoom/>

## Fine-mapping Regions

| snp           | chr | pos (Mb) | pp          | group        | color  |
|---------------|-----|----------|-------------|--------------|--------|
| chr7:44829933 | 7   | 44.82993 | 0.076255075 | Credible Set | purple |
| chr7:44839966 | 7   | 44.83997 | 0.077914501 | Credible Set | purple |
| chr7:44844016 | 7   | 44.84402 | 0.077689067 | Credible Set | purple |
| chr7:44844285 | 7   | 44.84428 | 0.083580561 | Credible Set | purple |
| chr7:44844322 | 7   | 44.84432 | 0.077689067 | Credible Set | purple |
| chr7:44851630 | 7   | 44.85163 | 0.070642061 | Credible Set | purple |
| chr7:44852639 | 7   | 44.85264 | 0.027791039 | Credible Set | purple |
| chr7:44852965 | 7   | 44.85296 | 0.064054774 | Credible Set | purple |
| chr7:44866590 | 7   | 44.86659 | 0.062306105 | Credible Set | purple |
| chr7:44891663 | 7   | 44.89166 | 0.065608028 | Credible Set | purple |
| chr7:44912209 | 7   | 44.91221 | 0.072611945 | Credible Set | purple |
| chr7:45001761 | 7   | 45.00176 | 0.078409708 | Credible Set | purple |
| chr7:45012901 | 7   | 45.01290 | 0.036685318 | Credible Set | purple |
| chr7:45025410 | 7   | 45.02541 | 0.007242901 | Credible Set | purple |
| chr7:45025443 | 7   | 45.02544 | 0.007244986 | Credible Set | purple |
| chr7:45026544 | 7   | 45.02654 | 0.008733339 | Credible Set | purple |
| chr7:45026548 | 7   | 45.02655 | 0.008700908 | Credible Set | purple |
| chr7:45029371 | 7   | 45.02937 | 0.006564970 | Credible Set | purple |
| chr7:45029402 | 7   | 45.02940 | 0.005385265 | Credible Set | purple |
| chr7:45029407 | 7   | 45.02941 | 0.005390352 | Credible Set | purple |
| chr7:45029413 | 7   | 45.02941 | 0.005391354 | Credible Set | purple |
| chr7:45029777 | 7   | 45.02978 | 0.005455005 | Credible Set | purple |
| chr7:45033529 | 7   | 45.03353 | 0.006564970 | Credible Set | purple |
| chr7:45041503 | 7   | 45.04150 | 0.005897525 | Credible Set | purple |
| chr7:45041522 | 7   | 45.04152 | 0.006080683 | Credible Set | purple |
| chr7:45041933 | 7   | 45.04193 | 0.007166194 | Credible Set | purple |
| chr7:45047834 | 7   | 45.04783 | 0.007495305 | Credible Set | purple |
| chr7:45047913 | 7   | 45.04791 | 0.009921599 | Credible Set | purple |
| chr7:45049496 | 7   | 45.04950 | 0.008655283 | Credible Set | purple |
| chr7:45084764 | 7   | 45.08476 | 0.004482703 | Credible Set | purple |
| chr7:45102598 | 7   | 45.10260 | 0.004690384 | Credible Set | purple |

# F34 GBS, retic parameters cell hemoglobin distribution width, repeat

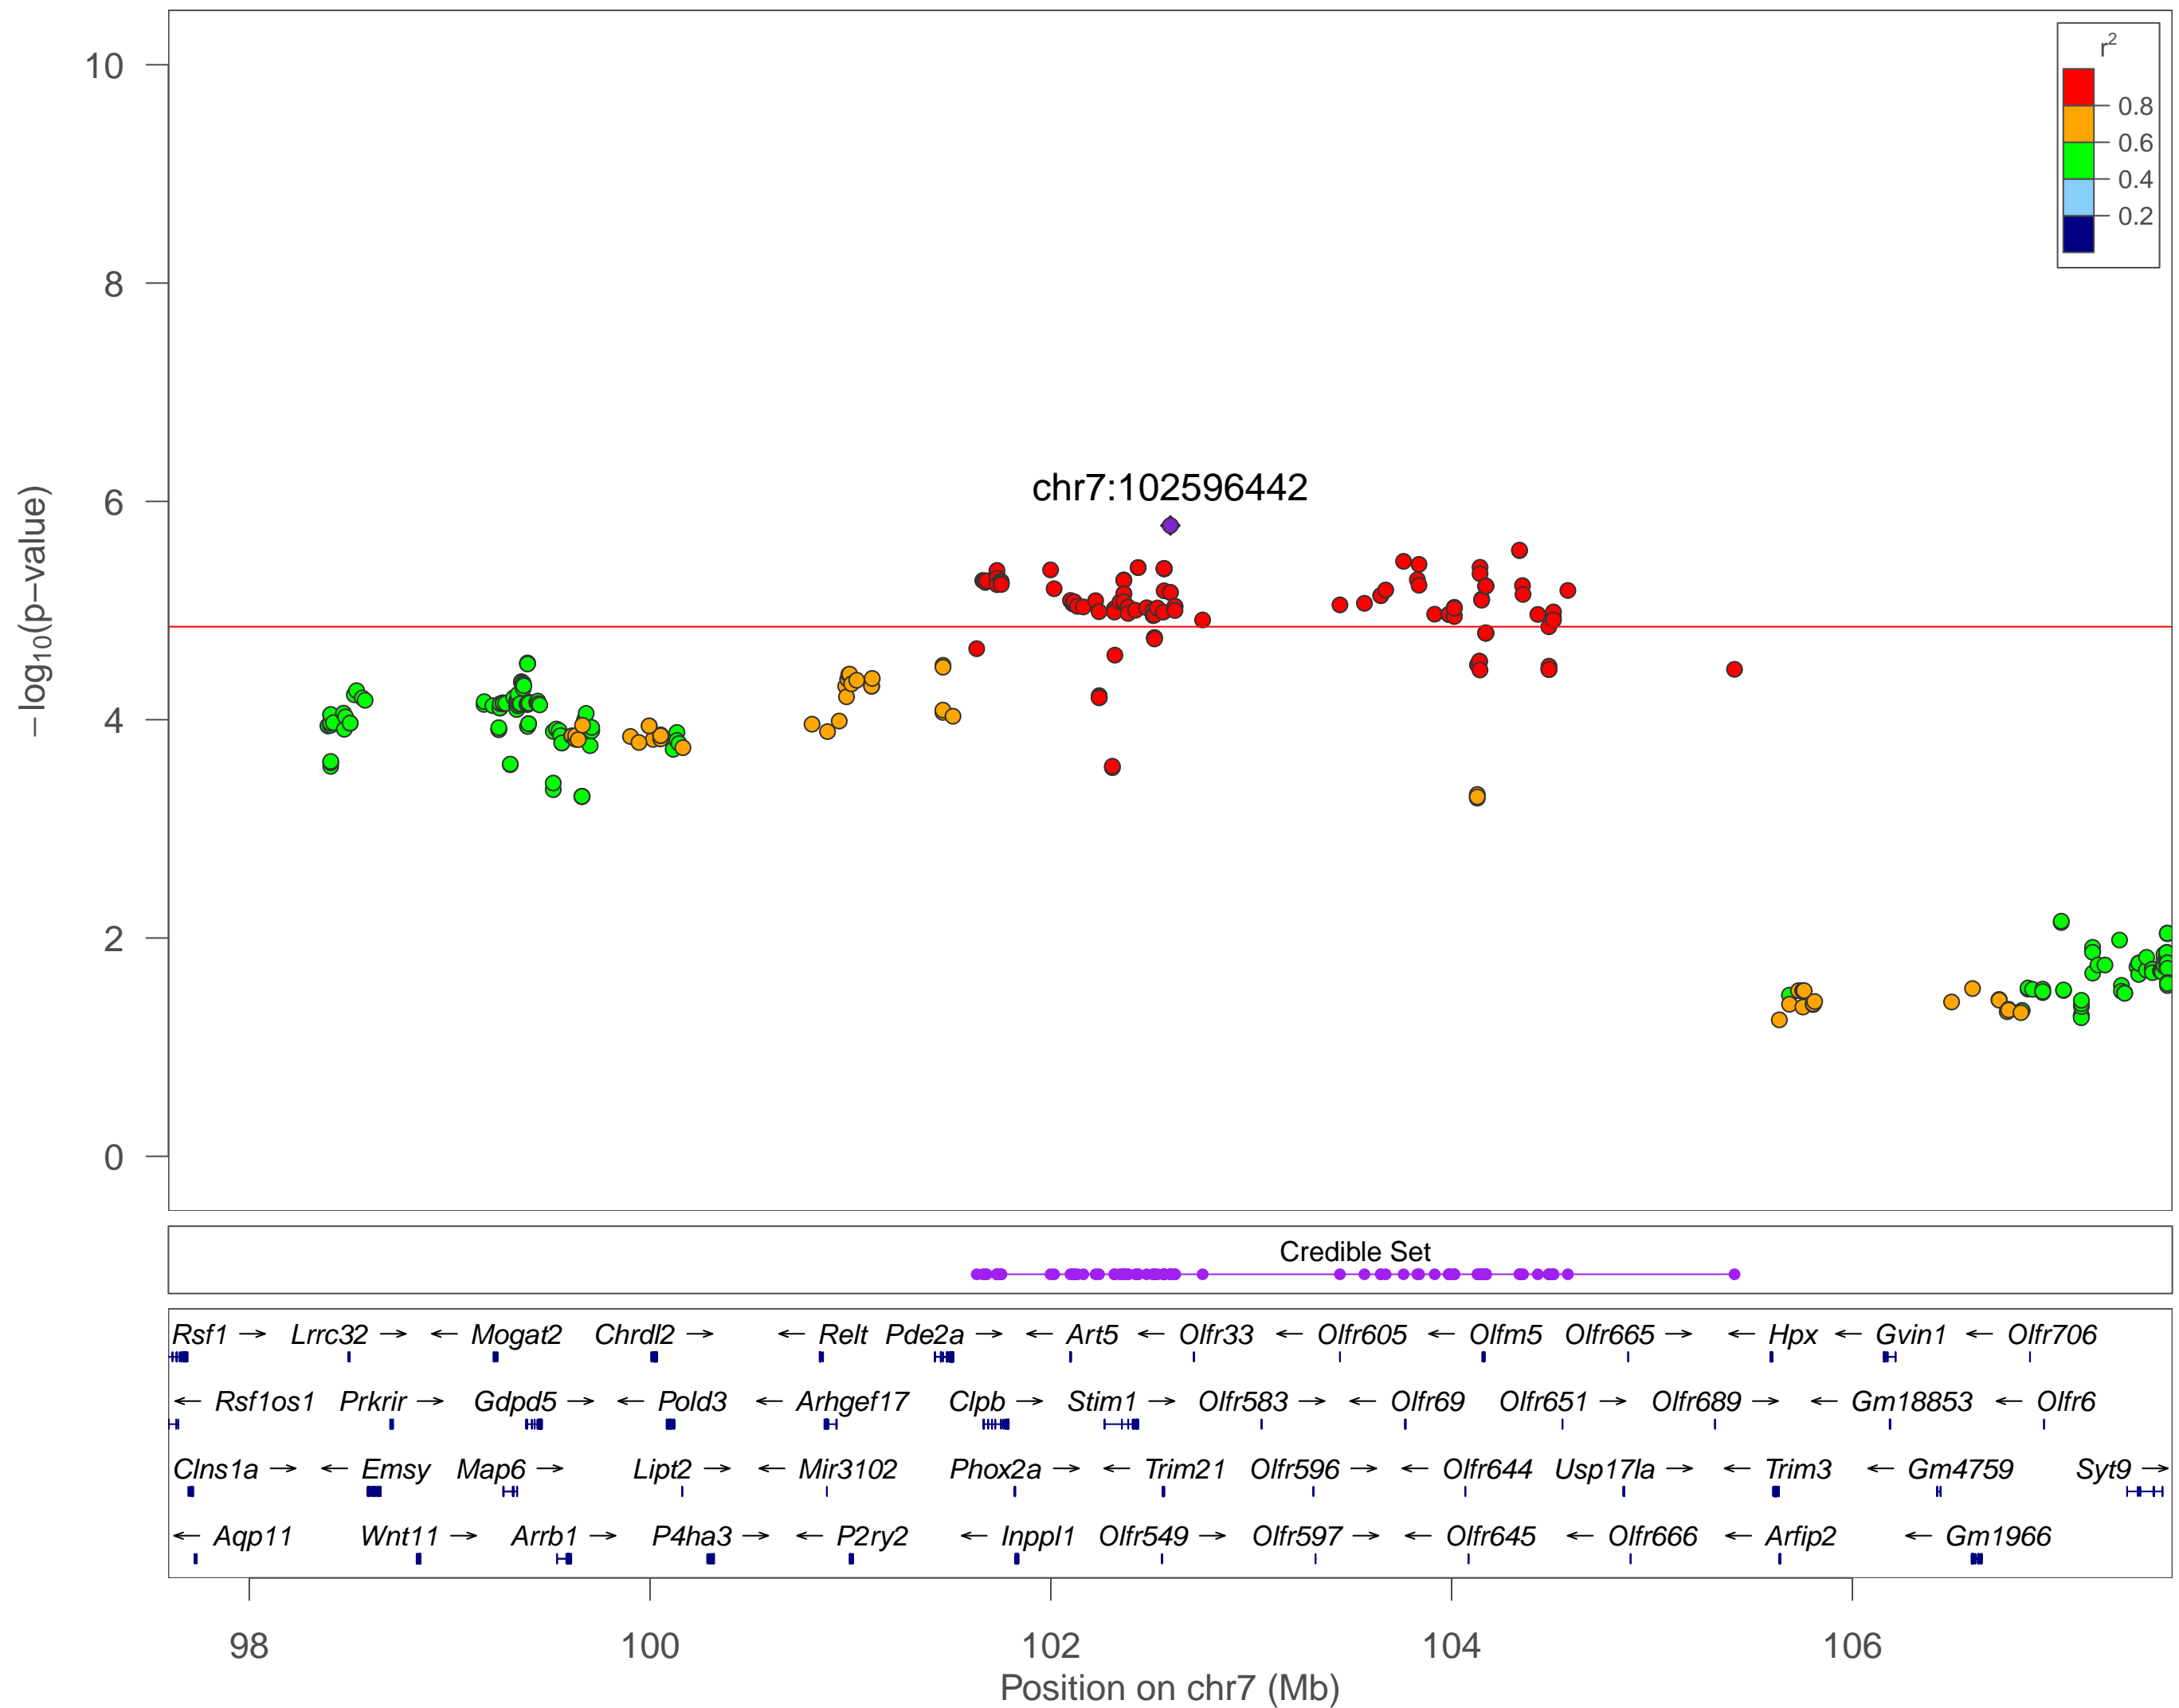

date: Thu Oct 25 17:10:16 2018

build: F34GBS

display range: chr7:97596442–107596442 [97596442–107596442]

hilite range: 0 – 0 [ 0 – 0 ]

reference SNP: chr7:102596442

number of SNPs plotted: 347

min P-value: 1.66E–6 [chr7:102596442]

max P-value: 5.62E–2 [chr7:105635493]

omitted Genes: Pak1, Gdpd4, Myo7a

omitted Genes: Capn5, Omp, Gm16938

omitted Genes: B3gnt6, Acer3, Tsku

omitted Genes: Gucy2d, Uvrag, Dgat2

omitted Genes: Gm26705, Serpinh1, Kihl35

omitted Genes: Rps3, Snord15b, Snord15a

omitted Genes: Mir326, Tpbgl, Slco2b1

omitted Genes: Olfr520, Olfr521, Neu3

omitted Genes: Spcs2, Xrra1, Rnf169

omitted Genes: Kcne3, Pgm2l1, Gpx2-ps1

omitted Genes: Ppme1, C2cd3, Ucp3

omitted Genes: Ucp2, Dnajb13, Coa4

omitted Genes: Mrpl48, Rab6a, Plekha1

omitted Genes: Fam168a, P2ry6, Fchs2

omitted Genes: Atg16l2, Stard10, Arap1

omitted Genes: Mir139, Art2a-ps, Art2b

omitted Genes: Folr2, Folr1, Anapc15

omitted Genes: Tomt, Lamtor1, Lrrc51

omitted Genes: Numa1, Il18bp, Rnf121

omitted Genes: Xndc1, Xntrpc, Trpc2

omitted Genes: Art1, Chrna10, Nup98

omitted Genes: Pgap2, Rhog, Rrm1

omitted Genes: Olfr543, Olfr544, Olfr545

omitted Genes: Olfr547, Olfr550, Olfr551

omitted Genes: Olfr552, Olfr553, Olfr554

omitted Genes: Olfr555, Olfr556, Trim68

omitted Genes: Olfr557, Olfr558, Olfr559

omitted Genes: Olfr78, Olfr560, Olfr561

omitted Genes: Olfr564, Olfr566, Olfr568

omitted Genes: Olfr569, Olfr570, Olfr571

omitted Genes: Olfr572, Olfr574, Olfr575

omitted Genes: Olfr576, Olfr577, Olfr578

Make more plots at <http://csg.sph.umich.edu/locuszoom/>



## Fine-mapping Regions

| snp            | chr | pos (Mb) | pp          | group        | color  |
|----------------|-----|----------|-------------|--------------|--------|
| chr7:101630176 | 7   | 101.6302 | 0.003096999 | Credible Set | purple |
| chr7:101660383 | 7   | 101.6604 | 0.012223216 | Credible Set | purple |
| chr7:101669186 | 7   | 101.6692 | 0.012120864 | Credible Set | purple |
| chr7:101673483 | 7   | 101.6735 | 0.011764260 | Credible Set | purple |
| chr7:101680140 | 7   | 101.6801 | 0.012162155 | Credible Set | purple |
| chr7:101731061 | 7   | 101.7311 | 0.013717504 | Credible Set | purple |
| chr7:101731110 | 7   | 101.7311 | 0.014983276 | Credible Set | purple |
| chr7:101731130 | 7   | 101.7311 | 0.012766398 | Credible Set | purple |
| chr7:101731658 | 7   | 101.7317 | 0.011235698 | Credible Set | purple |
| chr7:101751790 | 7   | 101.7518 | 0.012022773 | Credible Set | purple |
| chr7:101752580 | 7   | 101.7526 | 0.011764703 | Credible Set | purple |
| chr7:101752971 | 7   | 101.7530 | 0.011283295 | Credible Set | purple |
| chr7:101998679 | 7   | 101.9987 | 0.015148262 | Credible Set | purple |
| chr7:102016307 | 7   | 102.0163 | 0.010350693 | Credible Set | purple |
| chr7:102098054 | 7   | 102.0981 | 0.008168876 | Credible Set | purple |
| chr7:102110109 | 7   | 102.1101 | 0.007618489 | Credible Set | purple |
| chr7:102110501 | 7   | 102.1105 | 0.007761370 | Credible Set | purple |
| chr7:102116318 | 7   | 102.1163 | 0.007880212 | Credible Set | purple |
| chr7:102116430 | 7   | 102.1164 | 0.007880212 | Credible Set | purple |
| chr7:102116478 | 7   | 102.1165 | 0.007960892 | Credible Set | purple |
| chr7:102132562 | 7   | 102.1326 | 0.007255263 | Credible Set | purple |
| chr7:102162058 | 7   | 102.1621 | 0.007173808 | Credible Set | purple |
| chr7:102223396 | 7   | 102.2234 | 0.008138683 | Credible Set | purple |
| chr7:102240695 | 7   | 102.2407 | 0.006514444 | Credible Set | purple |
| chr7:102317213 | 7   | 102.3172 | 0.006918461 | Credible Set | purple |
| chr7:102317246 | 7   | 102.3172 | 0.006464993 | Credible Set | purple |
| chr7:102319586 | 7   | 102.3196 | 0.002721322 | Credible Set | purple |
| chr7:102344970 | 7   | 102.3450 | 0.007947491 | Credible Set | purple |
| chr7:102363897 | 7   | 102.3639 | 0.007849316 | Credible Set | purple |
| chr7:102364204 | 7   | 102.3642 | 0.012380383 | Credible Set | purple |
| chr7:102364223 | 7   | 102.3642 | 0.012234694 | Credible Set | purple |
| chr7:102364315 | 7   | 102.3643 | 0.009361449 | Credible Set | purple |
| chr7:102364326 | 7   | 102.3643 | 0.009361449 | Credible Set | purple |
| chr7:102364411 | 7   | 102.3644 | 0.007958604 | Credible Set | purple |
| chr7:102385520 | 7   | 102.3855 | 0.007151558 | Credible Set | purple |
| chr7:102385536 | 7   | 102.3855 | 0.006289323 | Credible Set | purple |

## Fine-mapping Regions

| snp            | chr | pos (Mb) | pp          | group        | color  |
|----------------|-----|----------|-------------|--------------|--------|
| chr7:102423165 | 7   | 102.4232 | 0.006711697 | Credible Set | purple |
| chr7:102435692 | 7   | 102.4357 | 0.015868556 | Credible Set | purple |
| chr7:102435720 | 7   | 102.4357 | 0.015868556 | Credible Set | purple |
| chr7:102478469 | 7   | 102.4785 | 0.007052608 | Credible Set | purple |
| chr7:102510475 | 7   | 102.5105 | 0.006648575 | Credible Set | purple |
| chr7:102510607 | 7   | 102.5106 | 0.006024644 | Credible Set | purple |
| chr7:102516878 | 7   | 102.5169 | 0.006090483 | Credible Set | purple |
| chr7:102517238 | 7   | 102.5172 | 0.003836833 | Credible Set | purple |
| chr7:102517241 | 7   | 102.5172 | 0.003878129 | Credible Set | purple |
| chr7:102517247 | 7   | 102.5172 | 0.003766622 | Credible Set | purple |
| chr7:102531652 | 7   | 102.5317 | 0.007025427 | Credible Set | purple |
| chr7:102561708 | 7   | 102.5617 | 0.006460720 | Credible Set | purple |
| chr7:102565262 | 7   | 102.5653 | 0.015471762 | Credible Set | purple |
| chr7:102565292 | 7   | 102.5653 | 0.015535507 | Credible Set | purple |
| chr7:102565307 | 7   | 102.5653 | 0.015520392 | Credible Set | purple |
| chr7:102565323 | 7   | 102.5653 | 0.015584350 | Credible Set | purple |
| chr7:102565329 | 7   | 102.5653 | 0.015584350 | Credible Set | purple |
| chr7:102565410 | 7   | 102.5654 | 0.009932812 | Credible Set | purple |
| chr7:102596442 | 7   | 102.5964 | 0.037183569 | Credible Set | purple |
| chr7:102596578 | 7   | 102.5966 | 0.009604558 | Credible Set | purple |
| chr7:102596636 | 7   | 102.5966 | 0.009599972 | Credible Set | purple |
| chr7:102619418 | 7   | 102.6194 | 0.007257376 | Credible Set | purple |
| chr7:102619431 | 7   | 102.6194 | 0.007256067 | Credible Set | purple |
| chr7:102619466 | 7   | 102.6195 | 0.006673185 | Credible Set | purple |
| chr7:102757499 | 7   | 102.7575 | 0.005518051 | Credible Set | purple |
| chr7:103442570 | 7   | 103.4426 | 0.007476220 | Credible Set | purple |
| chr7:103564836 | 7   | 103.5648 | 0.007716649 | Credible Set | purple |
| chr7:103646439 | 7   | 103.6464 | 0.009025333 | Credible Set | purple |
| chr7:103646709 | 7   | 103.6467 | 0.009004268 | Credible Set | purple |
| chr7:103671033 | 7   | 103.6710 | 0.010091982 | Credible Set | purple |
| chr7:103760301 | 7   | 103.7603 | 0.017991325 | Credible Set | purple |
| chr7:103829200 | 7   | 103.8292 | 0.012434995 | Credible Set | purple |
| chr7:103837099 | 7   | 103.8371 | 0.016944840 | Credible Set | purple |
| chr7:103837213 | 7   | 103.8372 | 0.011097493 | Credible Set | purple |
| chr7:103915503 | 7   | 103.9155 | 0.006196880 | Credible Set | purple |
| chr7:103986792 | 7   | 103.9868 | 0.006158547 | Credible Set | purple |

## Fine-mapping Regions

| snp            | chr | pos (Mb) | pp          | group        | color  |
|----------------|-----|----------|-------------|--------------|--------|
| chr7:103986795 | 7   | 103.9868 | 0.006158547 | Credible Set | purple |
| chr7:103986857 | 7   | 103.9869 | 0.006172090 | Credible Set | purple |
| chr7:103986860 | 7   | 103.9869 | 0.006172090 | Credible Set | purple |
| chr7:104012808 | 7   | 104.0128 | 0.006034451 | Credible Set | purple |
| chr7:104013370 | 7   | 104.0134 | 0.005918186 | Credible Set | purple |
| chr7:104013395 | 7   | 104.0134 | 0.007116710 | Credible Set | purple |
| chr7:104013467 | 7   | 104.0135 | 0.006974150 | Credible Set | purple |
| chr7:104129734 | 7   | 104.1297 | 0.002237892 | Credible Set | purple |
| chr7:104129736 | 7   | 104.1297 | 0.002237892 | Credible Set | purple |
| chr7:104138934 | 7   | 104.1389 | 0.002400300 | Credible Set | purple |
| chr7:104138936 | 7   | 104.1389 | 0.002408368 | Credible Set | purple |
| chr7:104138968 | 7   | 104.1390 | 0.002408368 | Credible Set | purple |
| chr7:104141705 | 7   | 104.1417 | 0.015962451 | Credible Set | purple |
| chr7:104141768 | 7   | 104.1418 | 0.014007024 | Credible Set | purple |
| chr7:104149893 | 7   | 104.1499 | 0.008394697 | Credible Set | purple |
| chr7:104149911 | 7   | 104.1499 | 0.008215429 | Credible Set | purple |
| chr7:104170479 | 7   | 104.1705 | 0.004239615 | Credible Set | purple |
| chr7:104170506 | 7   | 104.1705 | 0.004230559 | Credible Set | purple |
| chr7:104170518 | 7   | 104.1705 | 0.004268338 | Credible Set | purple |
| chr7:104170522 | 7   | 104.1705 | 0.004229257 | Credible Set | purple |
| chr7:104170543 | 7   | 104.1705 | 0.004227186 | Credible Set | purple |
| chr7:104170588 | 7   | 104.1706 | 0.010922302 | Credible Set | purple |
| chr7:104170594 | 7   | 104.1706 | 0.010925834 | Credible Set | purple |
| chr7:104170618 | 7   | 104.1706 | 0.010916495 | Credible Set | purple |
| chr7:104170662 | 7   | 104.1707 | 0.010916495 | Credible Set | purple |
| chr7:104338784 | 7   | 104.3388 | 0.022362521 | Credible Set | purple |
| chr7:104338810 | 7   | 104.3388 | 0.022579047 | Credible Set | purple |
| chr7:104353491 | 7   | 104.3535 | 0.011030919 | Credible Set | purple |
| chr7:104356230 | 7   | 104.3562 | 0.009230694 | Credible Set | purple |
| chr7:104430205 | 7   | 104.4302 | 0.006167265 | Credible Set | purple |
| chr7:104485236 | 7   | 104.4852 | 0.004809966 | Credible Set | purple |
| chr7:104485721 | 7   | 104.4857 | 0.002085735 | Credible Set | purple |
| chr7:104485727 | 7   | 104.4857 | 0.002038165 | Credible Set | purple |
| chr7:104486022 | 7   | 104.4860 | 0.002178204 | Credible Set | purple |
| chr7:104507724 | 7   | 104.5077 | 0.005871653 | Credible Set | purple |
| chr7:104508127 | 7   | 104.5081 | 0.006481453 | Credible Set | purple |

Fine-mapping Regions

| snp            | chr | pos (Mb) | pp          | group        | color  |
|----------------|-----|----------|-------------|--------------|--------|
| chr7:104508173 | 7   | 104.5082 | 0.005525199 | Credible Set | purple |
| chr7:104580091 | 7   | 104.5801 | 0.010002260 | Credible Set | purple |
| chr7:105411752 | 7   | 105.4118 | 0.002046595 | Credible Set | purple |

F34 GBS, retic parameters red cell distribution width, repeat

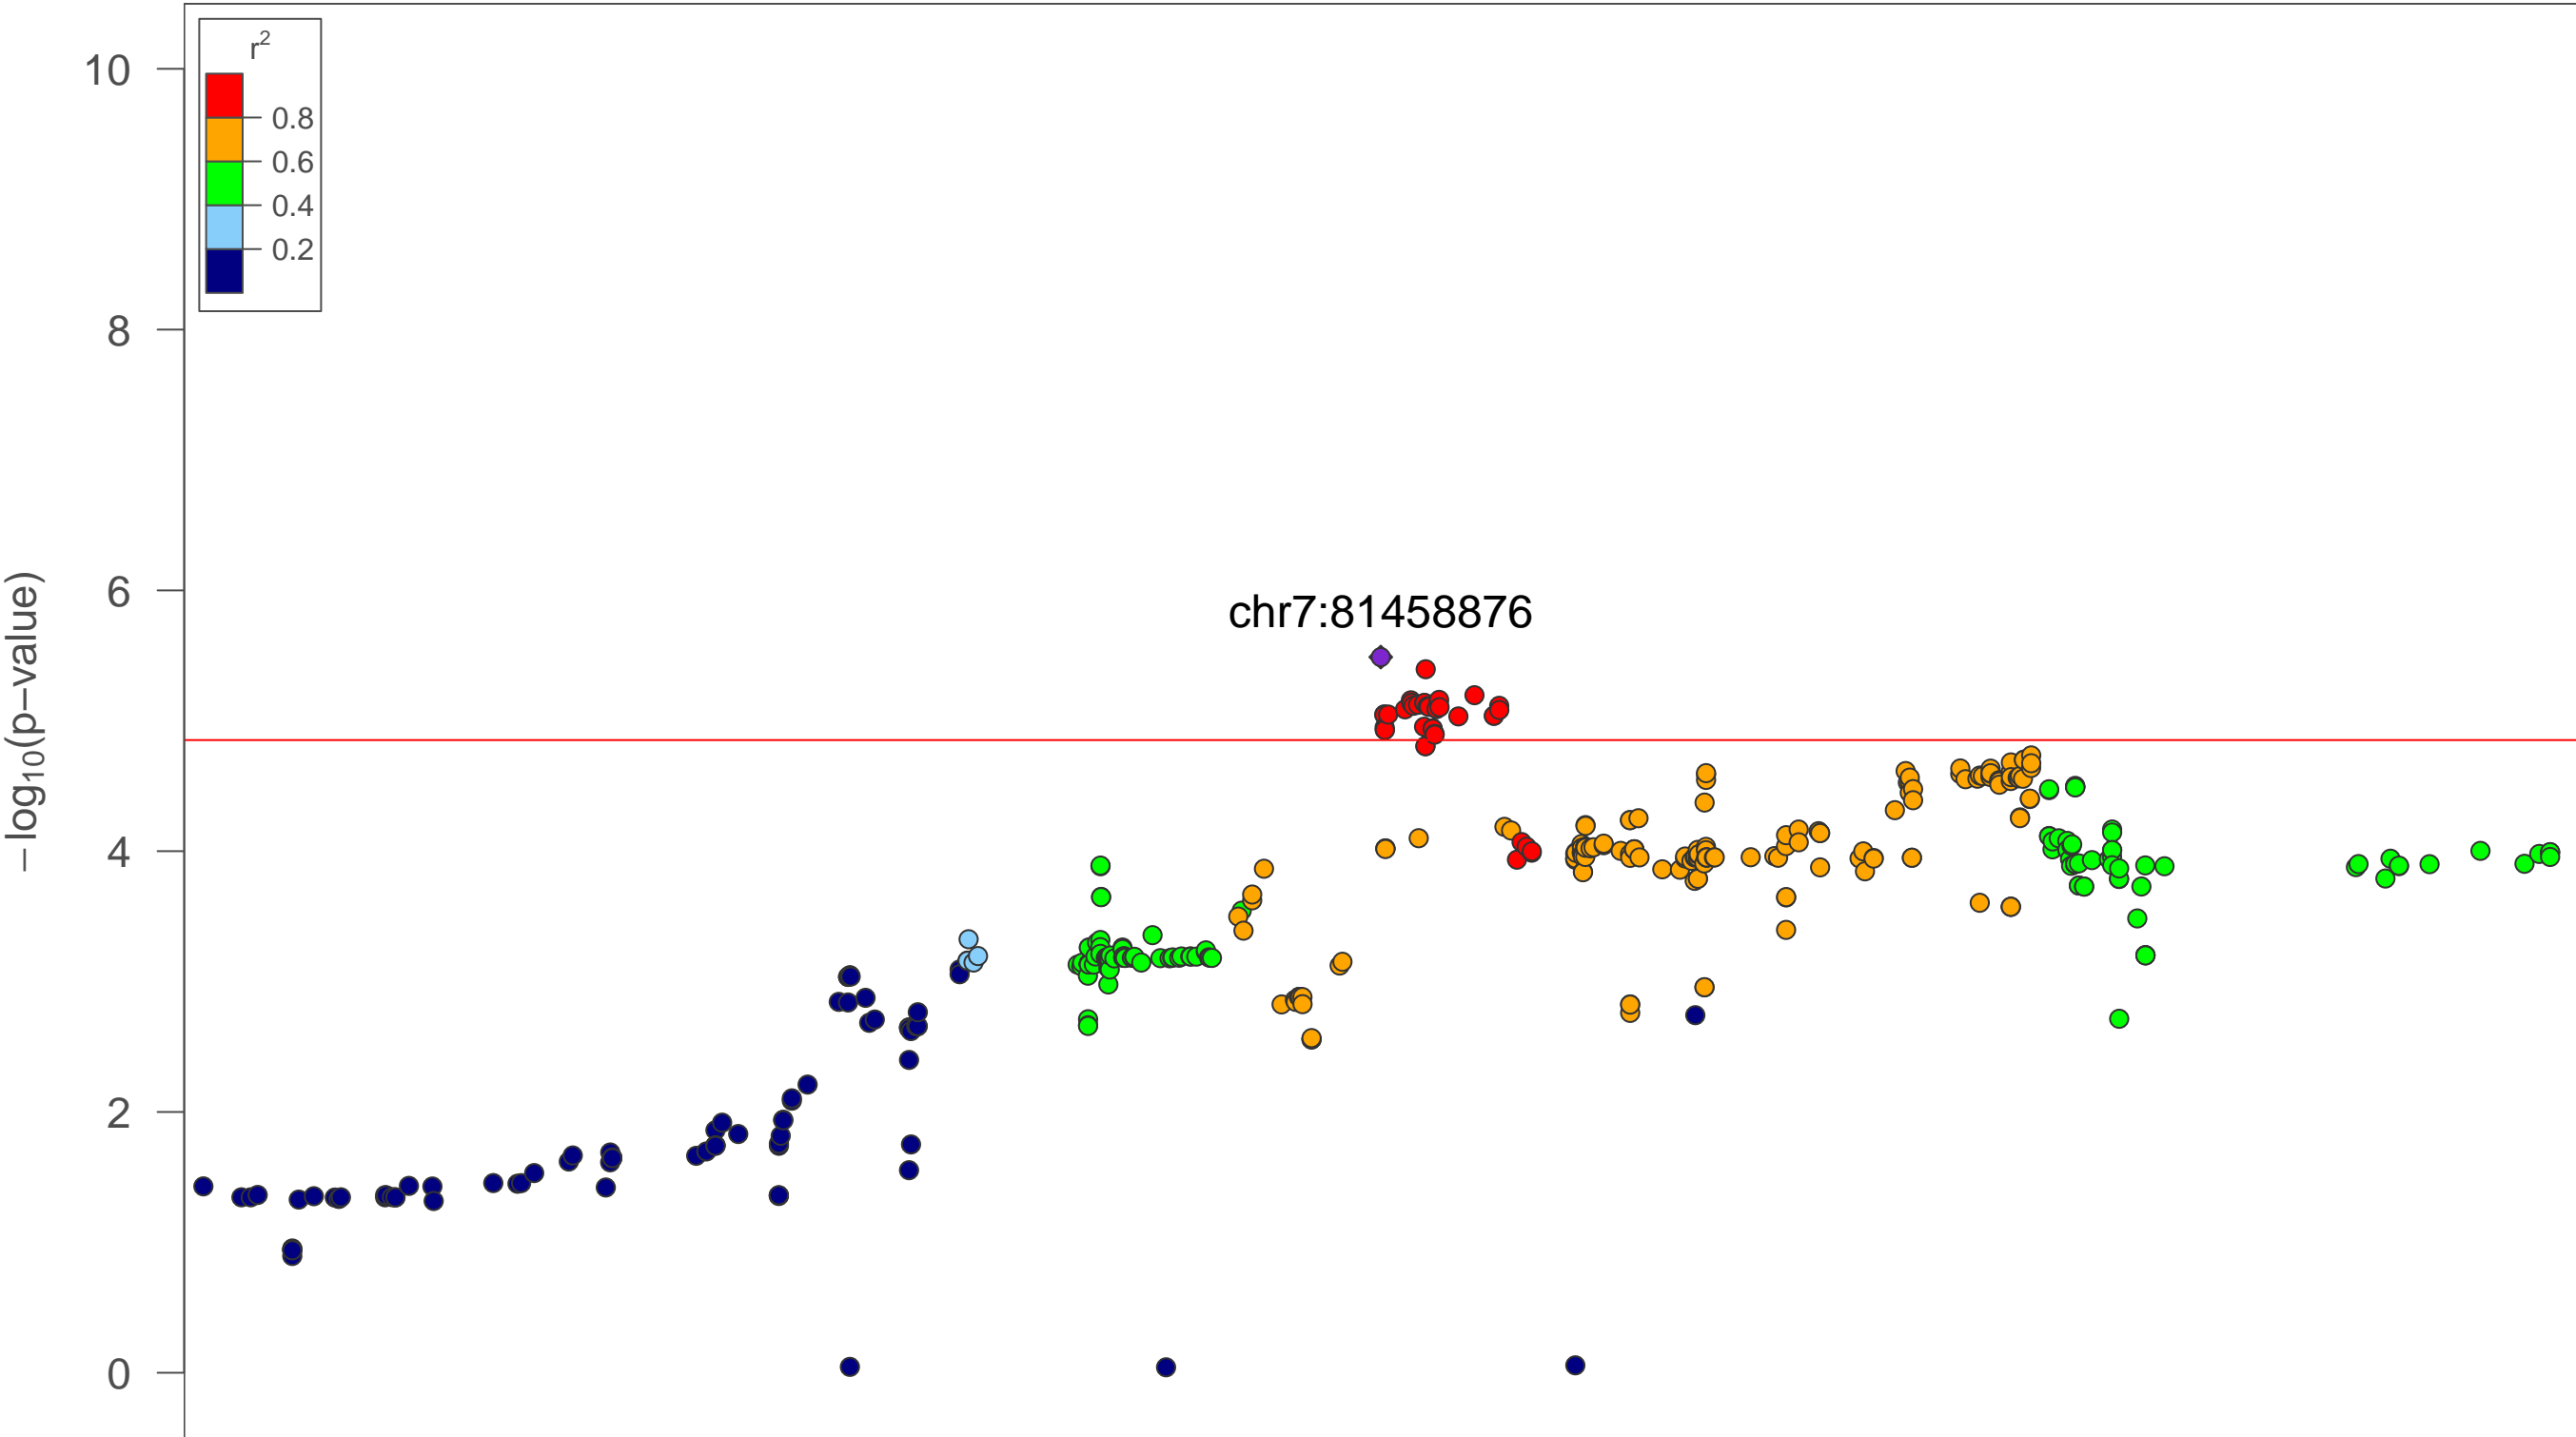

Credible Set

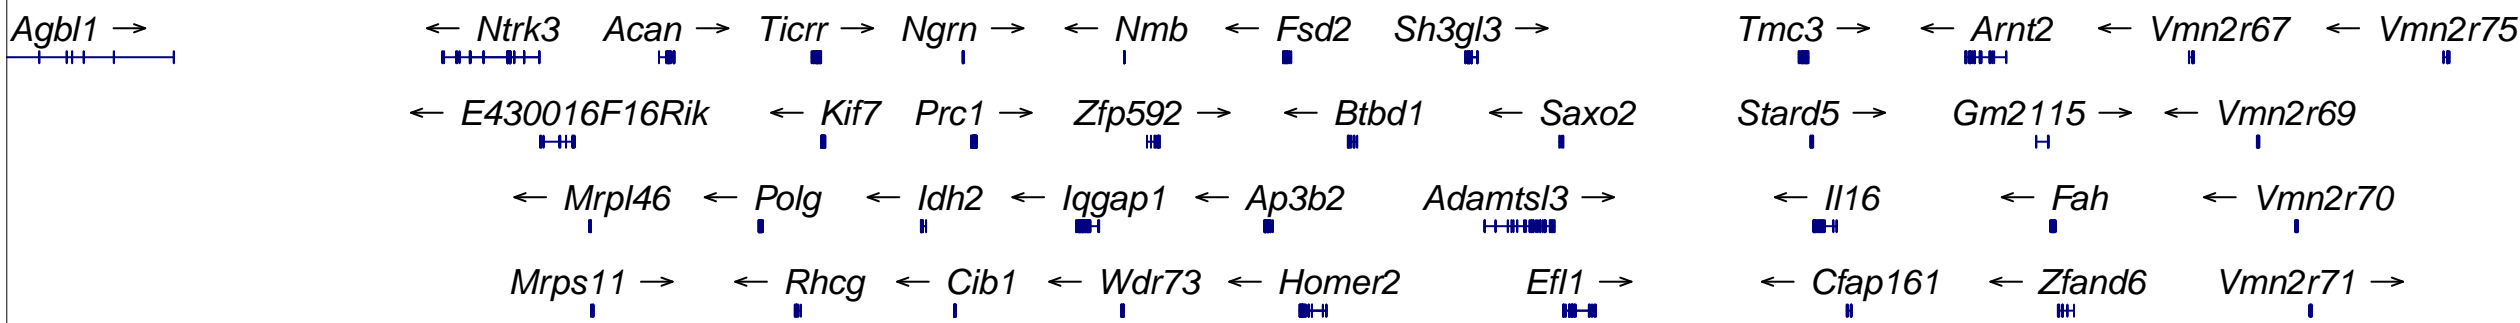

77 genes  
omitted

date: Thu Oct 25 17:10:40 2018  
build: F34GBS  
display range: chr7:76458876–86458876 [76458876–86458876]  
hilite range: 0 – 0 [ 0 – 0 ]  
reference SNP: chr7:81458876  
number of SNPs plotted: 417  
min P-value: 3.25E–6 [chr7:81458876]  
max P-value: 9.08E–1 [chr7:80561830]  
omitted Genes: Det1, Mir7–2, Aen  
omitted Genes: Isg20, Gm26633, Hapln3  
omitted Genes: Mfge8, Abhd2, Rlbp1  
omitted Genes: Fanci, Mir9–3hg, Mir9–3  
omitted Genes: Plin1, Pex11a, Wdr93  
omitted Genes: Mesp1, Mesp2, Anpep  
omitted Genes: Ap3s2, Arpin, Zfp710  
omitted Genes: Gm21057, Sema4b, Gdpgp1  
omitted Genes: Ttll13, Vps33b, Rccd1  
omitted Genes: Unc45a, Hddc3, Man2a2  
omitted Genes: Fes, Furin, Blm  
omitted Genes: Crtc3, Gm15880, Zscan2  
omitted Genes: Sec11a, Alpk3, Slc28a1  
omitted Genes: Pde8a, Rps17, Cpeb1  
omitted Genes: BC048679, 2900076A07Rik, Mir1839  
omitted Genes: Whamm, Fam103a1, 3110040N11Rik  
omitted Genes: Tm6sf1, Hdgfrp3, Bnc1  
omitted Genes: Gm20744, 4933406J10Rik, Mex3b  
omitted Genes: 4933430H16Rik, Mesdc1, Mesdc2  
omitted Genes: Cemip, Abhd17c, 2610206C17Rik  
omitted Genes: Olfr291, Olfr290, Vmn2r65  
omitted Genes: Vmn2r66, Vmn2r68, Vmn2r72  
omitted Genes: Vmn2r73, Vmn2r74, Vmn2r76  
omitted Genes: Olfr310, Olfr309, Olfr308  
omitted Genes: Olfr307, Olfr305, Olfr304  
omitted Genes: Olfr303, Olfr301

## Fine-mapping Regions

| snp           | chr | pos (Mb) | pp         | group        | color  |
|---------------|-----|----------|------------|--------------|--------|
| chr7:81458876 | 7   | 81.45888 | 0.06616771 | Credible Set | purple |
| chr7:81473821 | 7   | 81.47382 | 0.02512823 | Credible Set | purple |
| chr7:81473841 | 7   | 81.47384 | 0.02487803 | Credible Set | purple |
| chr7:81475123 | 7   | 81.47512 | 0.02016831 | Credible Set | purple |
| chr7:81475858 | 7   | 81.47586 | 0.01933686 | Credible Set | purple |
| chr7:81475869 | 7   | 81.47587 | 0.01932098 | Credible Set | purple |
| chr7:81489705 | 7   | 81.48971 | 0.02505795 | Credible Set | purple |
| chr7:81560306 | 7   | 81.56031 | 0.02734510 | Credible Set | purple |
| chr7:81584607 | 7   | 81.58461 | 0.03186561 | Credible Set | purple |
| chr7:81587028 | 7   | 81.58703 | 0.03051343 | Credible Set | purple |
| chr7:81587096 | 7   | 81.58710 | 0.03035124 | Credible Set | purple |
| chr7:81595380 | 7   | 81.59538 | 0.02904931 | Credible Set | purple |
| chr7:81614445 | 7   | 81.61445 | 0.02956262 | Credible Set | purple |
| chr7:81639723 | 7   | 81.63972 | 0.02040579 | Credible Set | purple |
| chr7:81641021 | 7   | 81.64102 | 0.03045086 | Credible Set | purple |
| chr7:81641166 | 7   | 81.64117 | 0.03051590 | Credible Set | purple |
| chr7:81645454 | 7   | 81.64545 | 0.01469745 | Credible Set | purple |
| chr7:81645464 | 7   | 81.64546 | 0.01470128 | Credible Set | purple |
| chr7:81646679 | 7   | 81.64668 | 0.05387744 | Credible Set | purple |
| chr7:81653902 | 7   | 81.65390 | 0.02886043 | Credible Set | purple |
| chr7:81660191 | 7   | 81.66019 | 0.02851127 | Credible Set | purple |
| chr7:81675727 | 7   | 81.67573 | 0.01983776 | Credible Set | purple |
| chr7:81675758 | 7   | 81.67576 | 0.01972593 | Credible Set | purple |
| chr7:81683805 | 7   | 81.68381 | 0.01807525 | Credible Set | purple |
| chr7:81683816 | 7   | 81.68382 | 0.01783724 | Credible Set | purple |
| chr7:81691936 | 7   | 81.69194 | 0.02749141 | Credible Set | purple |
| chr7:81691946 | 7   | 81.69195 | 0.02761668 | Credible Set | purple |
| chr7:81700477 | 7   | 81.70048 | 0.03110540 | Credible Set | purple |
| chr7:81702582 | 7   | 81.70258 | 0.03211692 | Credible Set | purple |
| chr7:81704380 | 7   | 81.70438 | 0.02835662 | Credible Set | purple |
| chr7:81783181 | 7   | 81.78318 | 0.02428726 | Credible Set | purple |
| chr7:81850247 | 7   | 81.85025 | 0.03473184 | Credible Set | purple |
| chr7:81931360 | 7   | 81.93136 | 0.02452354 | Credible Set | purple |
| chr7:81931538 | 7   | 81.93154 | 0.02456007 | Credible Set | purple |
| chr7:81953706 | 7   | 81.95371 | 0.02904836 | Credible Set | purple |
| chr7:81954104 | 7   | 81.95410 | 0.02705868 | Credible Set | purple |

Fine-mapping Regions

| snp           | chr | pos (Mb) | pp          | group        | color  |
|---------------|-----|----------|-------------|--------------|--------|
| chr7:82047190 | 7   | 82.04719 | 0.002948056 | Credible Set | purple |



F34 GBS, retic parameters hemoglobin distribution width, repeat

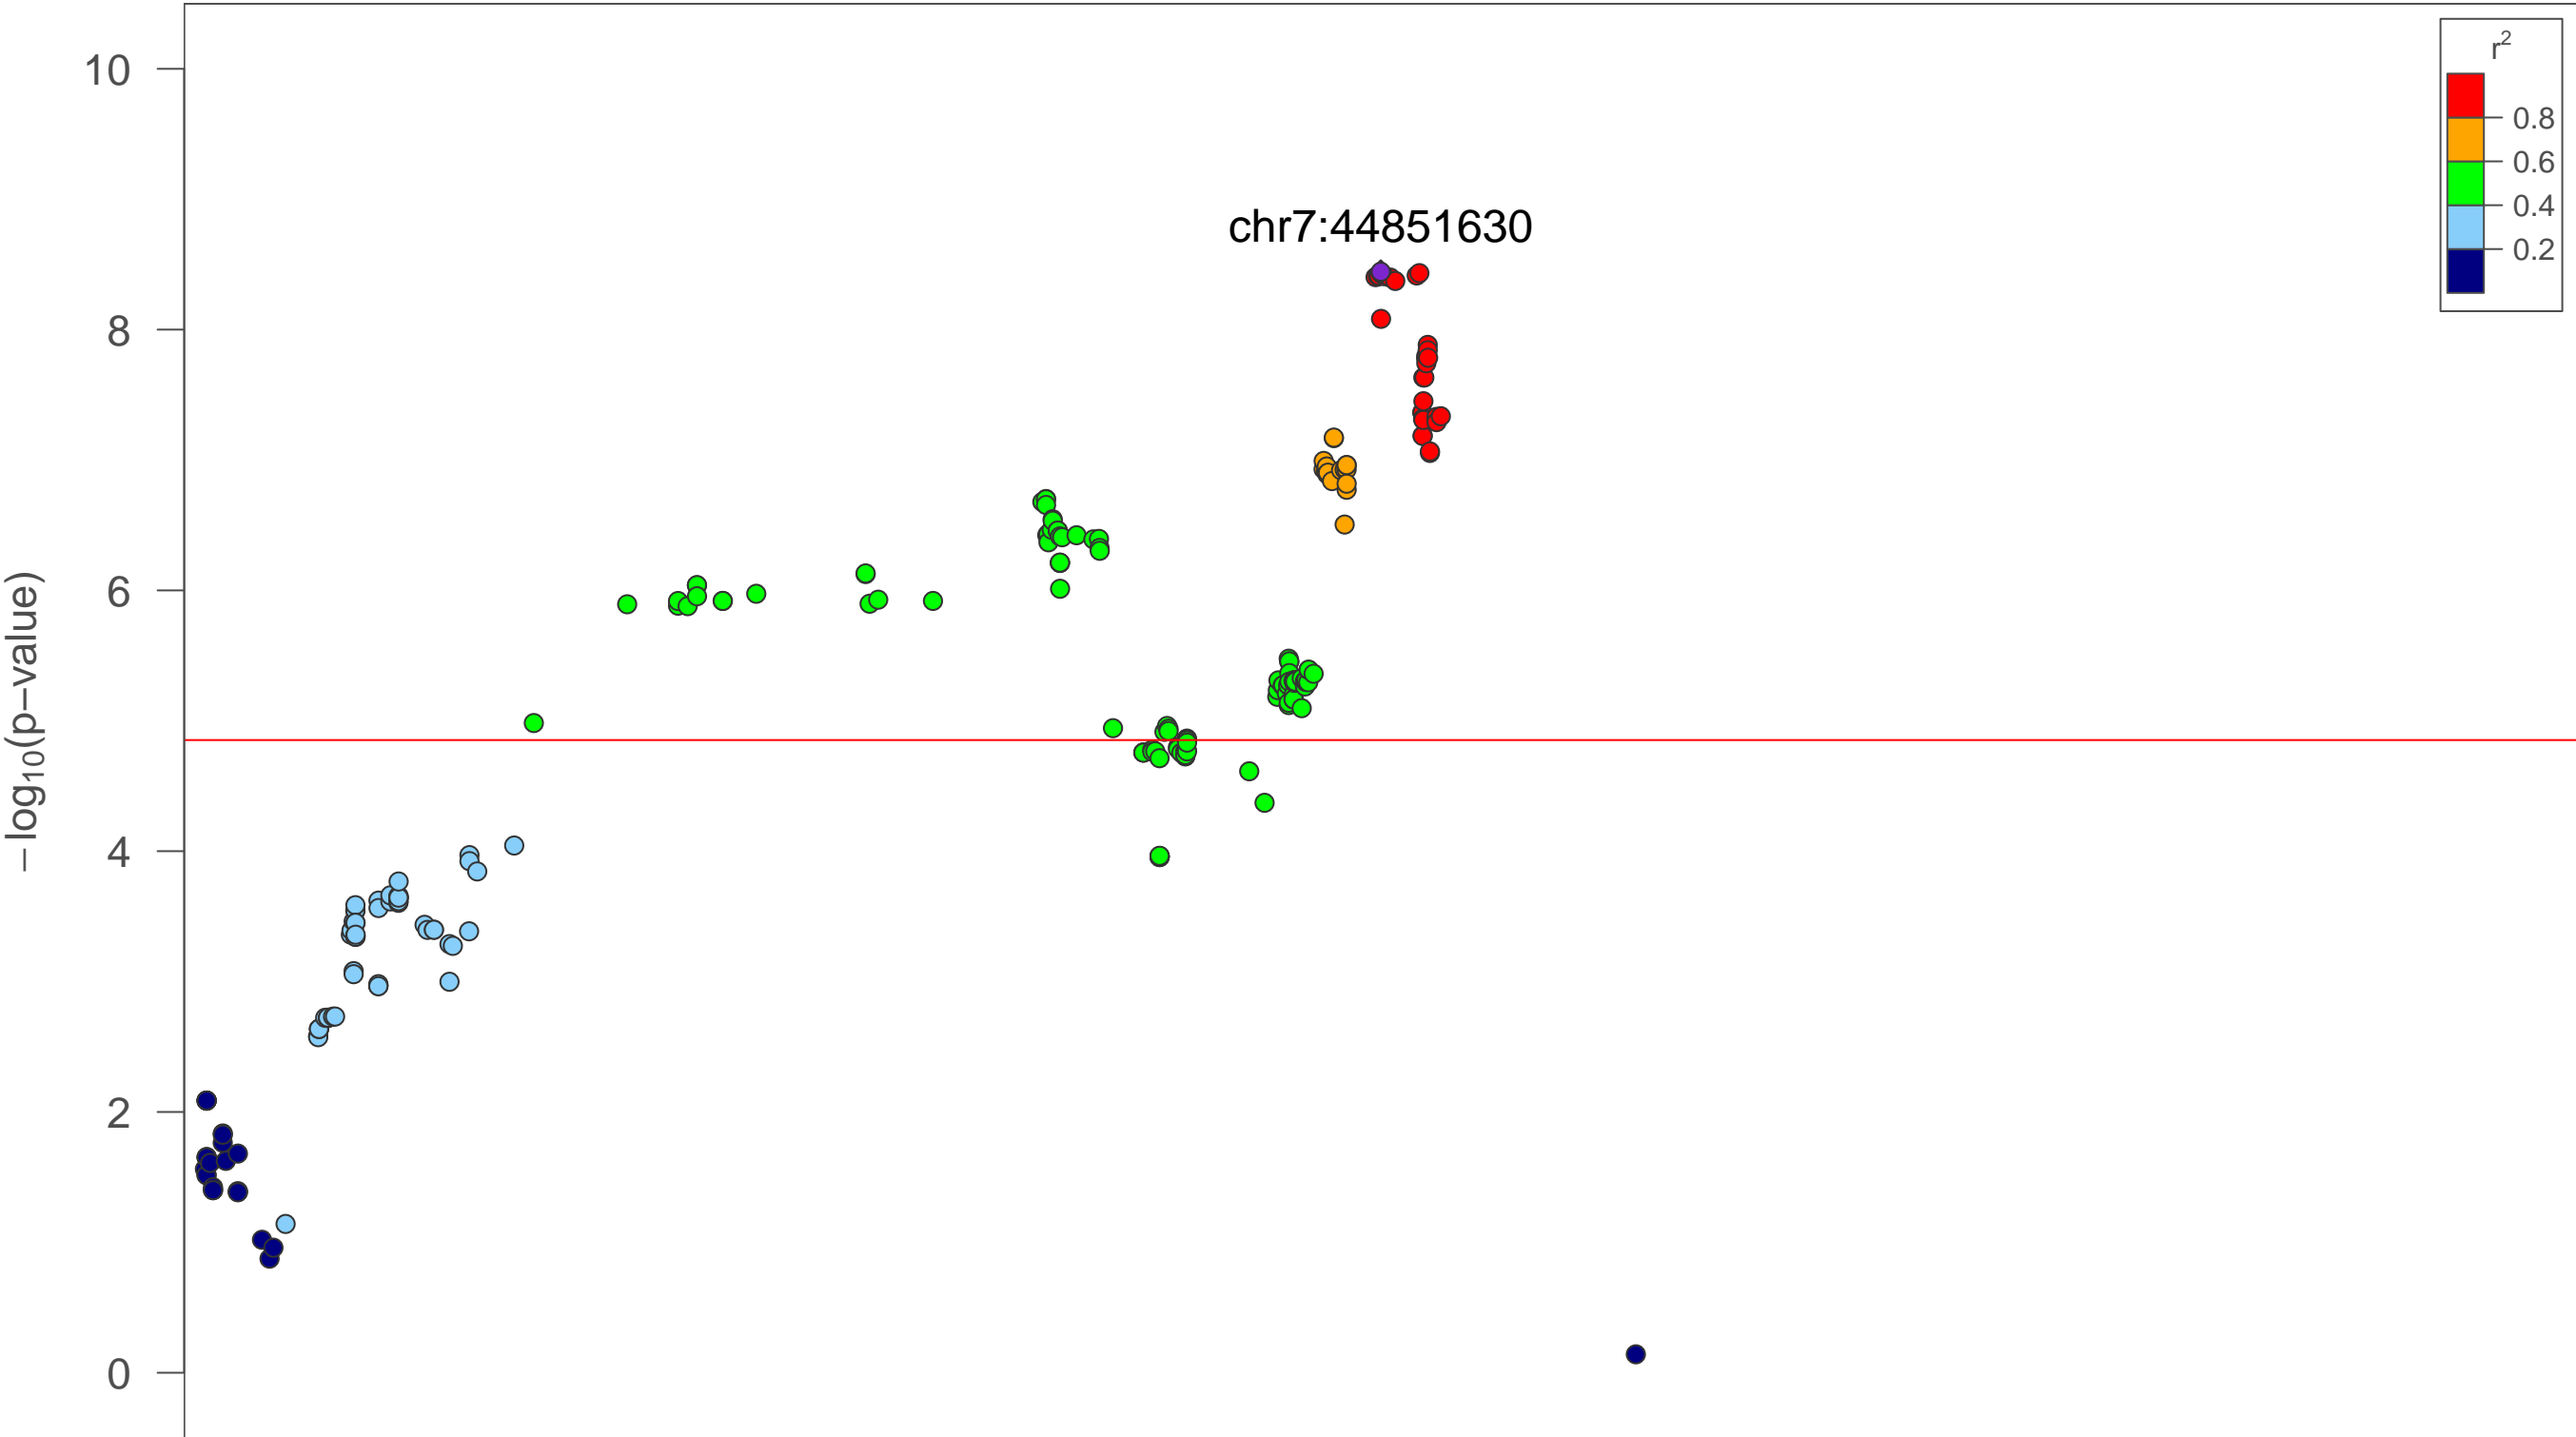

Credible Set

4933402C06Rik → ← Vmn2r58 ← Vmn2r62 ← Cd33 Klk1b3 → Il4i1 → Ntf5 → Nomo1 → ← Saa1 ← Mrgpra3 ← Mrgprb1 Nav2 →  
← A230077H06Rik ← Vmn2r59 ← Vmn2r63 Ctu1 → ← Acpt ← Atf5 Hrc → ← Emp3 ← Tph1 ← Mrgpra2a Mrgprb8 → ← Dbx1  
Vstm2b → Vmn2r60 → Gm9268 → Klk12 → Syt3 → Irf3 → Bcat2 → Otog → Ldhc → ← Mrgpra4 ← Csrp3 Prmt3 →  
4930433I11Rik → Vmn2r61 → Zfp936 → Klk6 → Lrrc4b → ← Fcgrt Ntn5 → Munc → ← Ptpn5 ← Mrgprx1 ← E2f8

198 genes  
omitted

Position on chr7 (Mb)

date: Thu Oct 25 17:11:16 2018

build: F34GBS

display range: chr7:39851630–49851630 [39851630–49851630]

hilite range: 0 – 0 [ 0 – 0 ]

reference SNP: chr7:44851630

number of SNPs plotted: 247

min P-value: 3.6E–9 [chr7:44851630]

max P-value: 7.22E–1 [chr7:45917340]

omitted Genes: Gm4884, 1700110I07Rik, Gm5592

omitted Genes: AI987944, Vmn2r57, AW146154

omitted Genes: Zfp788, Vmn2r-ps54, Vmn2r-ps60

omitted Genes: 4933421I07Rik, Zfp141, 9830147E19Rik

omitted Genes: Gm5595, Gm2381, EU599041

omitted Genes: Zfp715, Siglecf, Siglecg

omitted Genes: Lim2, Nkg7, Cldnd2

omitted Genes: Etfb, Mir7051, Vsig10l

omitted Genes: Iglon5, 4931406B18Rik, Zfp658

omitted Genes: Zfp719, Zfp819, Ceacam18

omitted Genes: Siglece, Klk14, Klk13

omitted Genes: 2310002F09Rik, Klk11, Klk10

omitted Genes: Klk9, Klk8, Klk7

omitted Genes: Klk5, Klk4, Klk15

omitted Genes: Klk1b7-ps, Klk1b8, Klk1b1

omitted Genes: Klk1b9, Klk1b11, Klk1b26

omitted Genes: Klk1b27, Klk1b21, Klk1b22

omitted Genes: Klk1b16, Klk1b24, Klk1b4

omitted Genes: Klk1b5, Klk1, 1700028J19Rik

omitted Genes: 2410002F23Rik, Snord88c, Snord88a

omitted Genes: Clec11a, Shank1, 1700008O03Rik

omitted Genes: Aspdh, Josd2, Mir7052

omitted Genes: 5430431A17Rik, Emc10, Fam71e1

omitted Genes: Mybpc2, Spib, Pold1

omitted Genes: Mir7053, Nr1h2, Napsa

omitted Genes: Kcnc3, Myh14, Izumo2

omitted Genes: Zfp473, Vrk3, Nup62

omitted Genes: Gm21948, Tbc1d17, Akt1s1

omitted Genes: Mir707, Pnkp, Ptov1

omitted Genes: Med25, Fuz, Ap2a1

omitted Genes: Tsks, Cpt1c, Prrm1

omitted Genes: Gm15545, Bcl2l12, Scf1

Make more plots at <http://csg.sph.umich.edu/locuszoom/>

## Fine-mapping Regions

| snp           | chr | pos (Mb) | pp          | group        | color  |
|---------------|-----|----------|-------------|--------------|--------|
| chr7:44829933 | 7   | 44.82993 | 0.063242520 | Credible Set | purple |
| chr7:44839966 | 7   | 44.83997 | 0.064545439 | Credible Set | purple |
| chr7:44844016 | 7   | 44.84402 | 0.064505343 | Credible Set | purple |
| chr7:44844285 | 7   | 44.84428 | 0.065560645 | Credible Set | purple |
| chr7:44844322 | 7   | 44.84432 | 0.064505343 | Credible Set | purple |
| chr7:44851630 | 7   | 44.85163 | 0.069377128 | Credible Set | purple |
| chr7:44852639 | 7   | 44.85264 | 0.030886329 | Credible Set | purple |
| chr7:44852965 | 7   | 44.85296 | 0.067763560 | Credible Set | purple |
| chr7:44866590 | 7   | 44.86659 | 0.064281654 | Credible Set | purple |
| chr7:44891663 | 7   | 44.89166 | 0.062779023 | Credible Set | purple |
| chr7:44912209 | 7   | 44.91221 | 0.059203091 | Credible Set | purple |
| chr7:45001761 | 7   | 45.00176 | 0.065056667 | Credible Set | purple |
| chr7:45012901 | 7   | 45.01290 | 0.067751234 | Credible Set | purple |
| chr7:45025410 | 7   | 45.02541 | 0.006195526 | Credible Set | purple |
| chr7:45025443 | 7   | 45.02544 | 0.006214143 | Credible Set | purple |
| chr7:45026544 | 7   | 45.02654 | 0.004165466 | Credible Set | purple |
| chr7:45026548 | 7   | 45.02655 | 0.004157523 | Credible Set | purple |
| chr7:45029371 | 7   | 45.02937 | 0.011292601 | Credible Set | purple |
| chr7:45029402 | 7   | 45.02940 | 0.005576216 | Credible Set | purple |
| chr7:45029407 | 7   | 45.02941 | 0.005597764 | Credible Set | purple |
| chr7:45029413 | 7   | 45.02941 | 0.005455879 | Credible Set | purple |
| chr7:45029777 | 7   | 45.02978 | 0.007525295 | Credible Set | purple |
| chr7:45033529 | 7   | 45.03353 | 0.011292601 | Credible Set | purple |
| chr7:45041503 | 7   | 45.04150 | 0.016291766 | Credible Set | purple |
| chr7:45041522 | 7   | 45.04152 | 0.015598120 | Credible Set | purple |
| chr7:45041933 | 7   | 45.04193 | 0.014408712 | Credible Set | purple |
| chr7:45047834 | 7   | 45.04783 | 0.019762211 | Credible Set | purple |
| chr7:45047913 | 7   | 45.04791 | 0.018037235 | Credible Set | purple |
| chr7:45049496 | 7   | 45.04950 | 0.015855521 | Credible Set | purple |
| chr7:45084416 | 7   | 45.08442 | 0.005752337 | Credible Set | purple |
| chr7:45084764 | 7   | 45.08476 | 0.005257411 | Credible Set | purple |
| chr7:45102598 | 7   | 45.10260 | 0.005813696 | Credible Set | purple |

F34 GBS, retic parameters hemoglobin distribution width, repeat

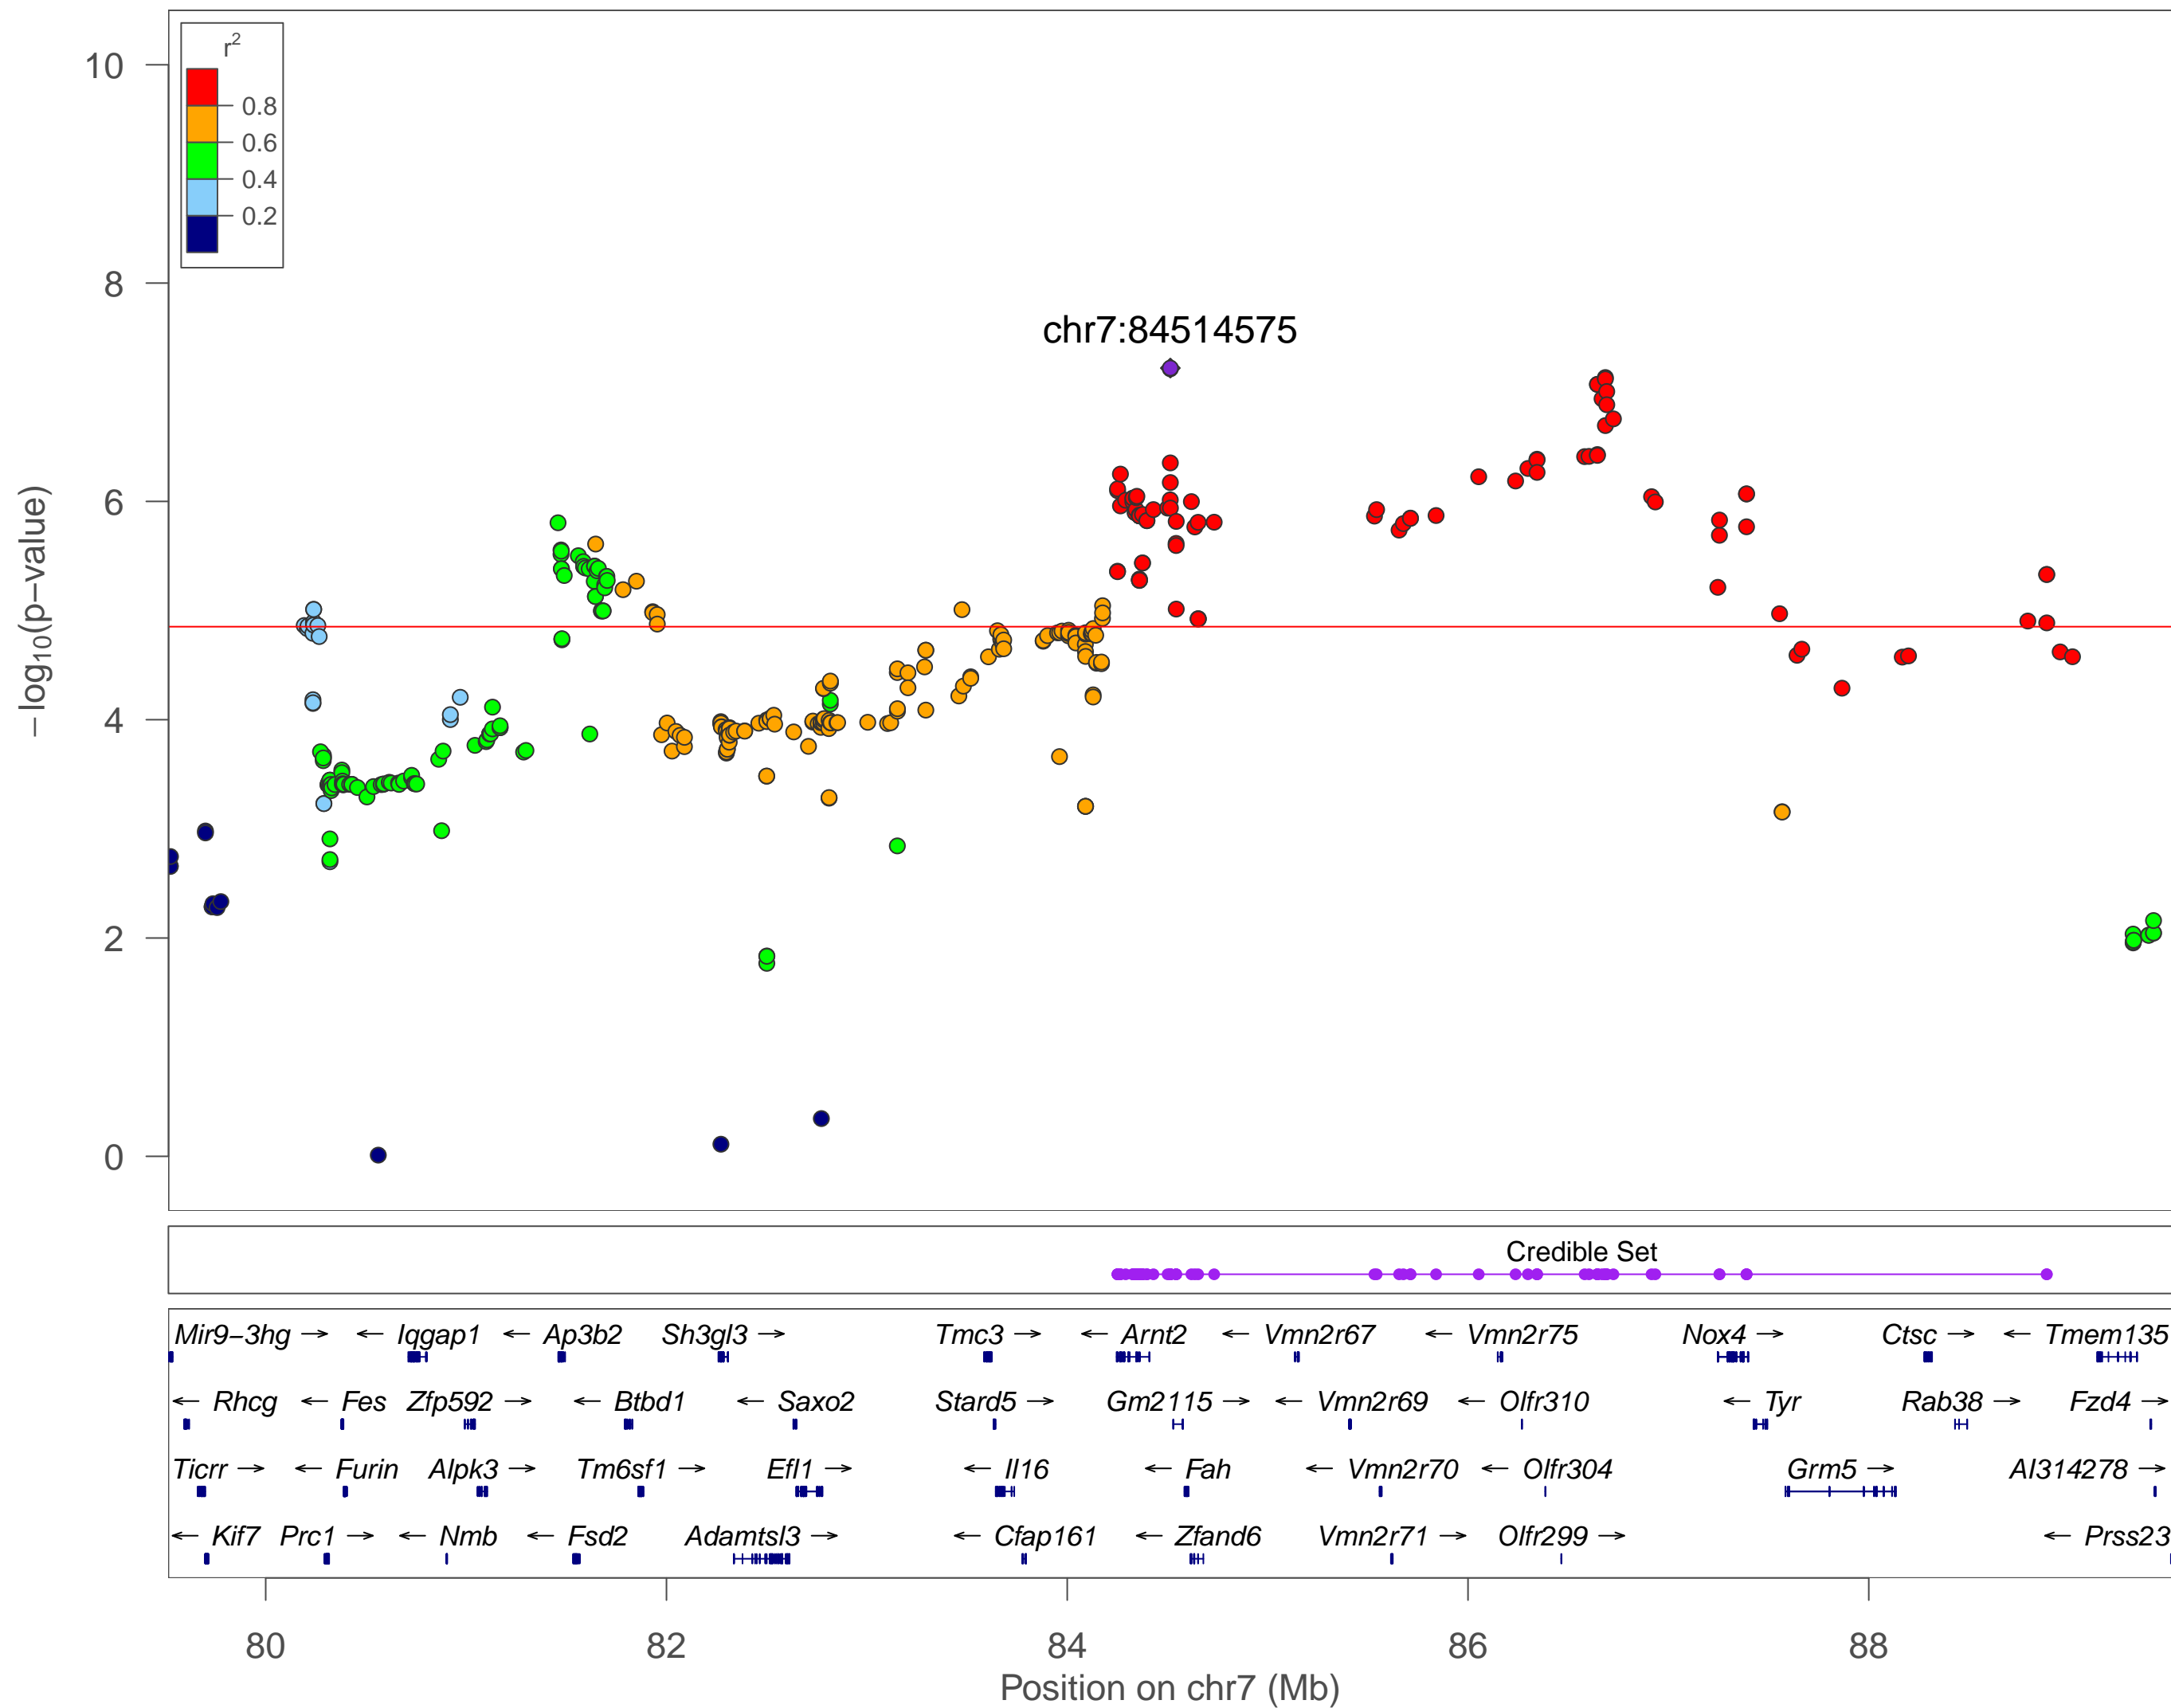

date: Thu Oct 25 17:11:26 2018  
build: F34GBS  
display range: chr7:79514575–89514575 [79514575–89514575]  
hilite range: 0 – 0 [ 0 – 0 ]  
reference SNP: chr7:84514575  
number of SNPs plotted: 389  
min P-value: 6E–8 [chr7:84514575]  
max P-value: 9.75E–1 [chr7:80561830]  
omitted Genes: Plin1, Pex11a, Wdr93  
omitted Genes: Mesp1, Mesp2, Anpep  
omitted Genes: Ap3s2, Arpin, Zfp710  
omitted Genes: Gm21057, Idh2, Sema4b  
omitted Genes: Cib1, Gdpgp1, Tll13  
omitted Genes: Ngrn, Vps33b, Rccd1  
omitted Genes: Unc45a, Hddc3, Man2a2  
omitted Genes: Blm, Crtc3, Gm15880  
omitted Genes: Zscan2, Wdr73, Sec11a  
omitted Genes: Slc28a1, Pde8a, Rps17  
omitted Genes: Cpeb1, BC048679, 2900076A07Rik  
omitted Genes: Mir1839, Whamm, Homer2  
omitted Genes: Fam103a1, 3110040N11Rik, Hdgfrp3  
omitted Genes: Bnc1, Gm20744, 4933406J10Rik  
omitted Genes: Mex3b, 4933430H16Rik, Mesdc1  
omitted Genes: Mesdc2, Cemip, Abhd17c  
omitted Genes: 2610206C17Rik, Olfr291, Olfr290  
omitted Genes: Vmn2r65, Vmn2r66, Vmn2r68  
omitted Genes: Vmn2r72, Vmn2r73, Vmn2r74  
omitted Genes: Vmn2r76, Olfr309, Olfr308  
omitted Genes: Olfr307, Olfr305, Olfr303  
omitted Genes: Olfr301, Olfr298, Olfr297  
omitted Genes: Olfr295, Olfr294, Olfr293  
omitted Genes: Olfr292, Folh1, Vmn2r77  
omitted Genes: Vmn2r78, Vmn2r79

## Fine-mapping Regions

| snp           | chr | pos (Mb) | pp          | group        | color  |
|---------------|-----|----------|-------------|--------------|--------|
| chr7:84250985 | 7   | 84.25099 | 0.001360020 | Credible Set | purple |
| chr7:84251011 | 7   | 84.25101 | 0.001346588 | Credible Set | purple |
| chr7:84251159 | 7   | 84.25116 | 0.006956519 | Credible Set | purple |
| chr7:84251209 | 7   | 84.25121 | 0.007221524 | Credible Set | purple |
| chr7:84265410 | 7   | 84.26541 | 0.009742708 | Credible Set | purple |
| chr7:84265685 | 7   | 84.26569 | 0.005104929 | Credible Set | purple |
| chr7:84291540 | 7   | 84.29154 | 0.005729120 | Credible Set | purple |
| chr7:84327288 | 7   | 84.32729 | 0.005562292 | Credible Set | purple |
| chr7:84327808 | 7   | 84.32781 | 0.005978483 | Credible Set | purple |
| chr7:84327850 | 7   | 84.32785 | 0.005967179 | Credible Set | purple |
| chr7:84338595 | 7   | 84.33859 | 0.004445736 | Credible Set | purple |
| chr7:84343118 | 7   | 84.34312 | 0.004730137 | Credible Set | purple |
| chr7:84344805 | 7   | 84.34480 | 0.006031629 | Credible Set | purple |
| chr7:84347423 | 7   | 84.34742 | 0.006204436 | Credible Set | purple |
| chr7:84360038 | 7   | 84.36004 | 0.004234925 | Credible Set | purple |
| chr7:84360224 | 7   | 84.36022 | 0.001160061 | Credible Set | purple |
| chr7:84360626 | 7   | 84.36063 | 0.004172698 | Credible Set | purple |
| chr7:84360642 | 7   | 84.36064 | 0.004172698 | Credible Set | purple |
| chr7:84360703 | 7   | 84.36070 | 0.004172698 | Credible Set | purple |
| chr7:84360714 | 7   | 84.36071 | 0.004172698 | Credible Set | purple |
| chr7:84360716 | 7   | 84.36072 | 0.004172698 | Credible Set | purple |
| chr7:84375526 | 7   | 84.37553 | 0.004291484 | Credible Set | purple |
| chr7:84375577 | 7   | 84.37558 | 0.001605662 | Credible Set | purple |
| chr7:84375642 | 7   | 84.37564 | 0.001605662 | Credible Set | purple |
| chr7:84397575 | 7   | 84.39758 | 0.003784376 | Credible Set | purple |
| chr7:84397597 | 7   | 84.39760 | 0.003784376 | Credible Set | purple |
| chr7:84430102 | 7   | 84.43010 | 0.004736942 | Credible Set | purple |
| chr7:84501082 | 7   | 84.50108 | 0.004881938 | Credible Set | purple |
| chr7:84514082 | 7   | 84.51408 | 0.005771754 | Credible Set | purple |
| chr7:84514444 | 7   | 84.51444 | 0.012233069 | Credible Set | purple |
| chr7:84514505 | 7   | 84.51450 | 0.008203041 | Credible Set | purple |
| chr7:84514564 | 7   | 84.51456 | 0.083415916 | Credible Set | purple |
| chr7:84514575 | 7   | 84.51457 | 0.084641734 | Credible Set | purple |
| chr7:84514734 | 7   | 84.51473 | 0.004890651 | Credible Set | purple |
| chr7:84543346 | 7   | 84.54335 | 0.002387437 | Credible Set | purple |
| chr7:84543355 | 7   | 84.54336 | 0.002286908 | Credible Set | purple |

## Fine-mapping Regions

| snp           | chr | pos (Mb) | pp          | group        | color  |
|---------------|-----|----------|-------------|--------------|--------|
| chr7:84543782 | 7   | 84.54378 | 0.003726403 | Credible Set | purple |
| chr7:84619632 | 7   | 84.61963 | 0.005569132 | Credible Set | purple |
| chr7:84636759 | 7   | 84.63676 | 0.003331992 | Credible Set | purple |
| chr7:84653095 | 7   | 84.65309 | 0.003658194 | Credible Set | purple |
| chr7:84733186 | 7   | 84.73319 | 0.003667514 | Credible Set | purple |
| chr7:85533207 | 7   | 85.53321 | 0.004150514 | Credible Set | purple |
| chr7:85543843 | 7   | 85.54384 | 0.004733558 | Credible Set | purple |
| chr7:85656243 | 7   | 85.65624 | 0.003123987 | Credible Set | purple |
| chr7:85677494 | 7   | 85.67749 | 0.003564857 | Credible Set | purple |
| chr7:85712663 | 7   | 85.71266 | 0.003985331 | Credible Set | purple |
| chr7:85712975 | 7   | 85.71298 | 0.003962875 | Credible Set | purple |
| chr7:85840665 | 7   | 85.84067 | 0.004199307 | Credible Set | purple |
| chr7:86053386 | 7   | 86.05339 | 0.009230214 | Credible Set | purple |
| chr7:86237374 | 7   | 86.23737 | 0.008469903 | Credible Set | purple |
| chr7:86298979 | 7   | 86.29898 | 0.010928221 | Credible Set | purple |
| chr7:86344420 | 7   | 86.34442 | 0.013185160 | Credible Set | purple |
| chr7:86344437 | 7   | 86.34444 | 0.012975268 | Credible Set | purple |
| chr7:86344488 | 7   | 86.34449 | 0.010088022 | Credible Set | purple |
| chr7:86582139 | 7   | 86.58214 | 0.013905831 | Credible Set | purple |
| chr7:86603770 | 7   | 86.60377 | 0.013969827 | Credible Set | purple |
| chr7:86645719 | 7   | 86.64572 | 0.014498747 | Credible Set | purple |
| chr7:86645792 | 7   | 86.64579 | 0.014256802 | Credible Set | purple |
| chr7:86645947 | 7   | 86.64595 | 0.060698996 | Credible Set | purple |
| chr7:86645990 | 7   | 86.64599 | 0.060628029 | Credible Set | purple |
| chr7:86668998 | 7   | 86.66900 | 0.045196830 | Credible Set | purple |
| chr7:86685426 | 7   | 86.68543 | 0.069735103 | Credible Set | purple |
| chr7:86685507 | 7   | 86.68551 | 0.067735636 | Credible Set | purple |
| chr7:86685648 | 7   | 86.68565 | 0.026167191 | Credible Set | purple |
| chr7:86692214 | 7   | 86.69221 | 0.052430898 | Credible Set | purple |
| chr7:86692491 | 7   | 86.69249 | 0.040021818 | Credible Set | purple |
| chr7:86725518 | 7   | 86.72552 | 0.030008906 | Credible Set | purple |
| chr7:86916161 | 7   | 86.91616 | 0.006155316 | Credible Set | purple |
| chr7:86934710 | 7   | 86.93471 | 0.005532621 | Credible Set | purple |
| chr7:87254690 | 7   | 87.25469 | 0.002814049 | Credible Set | purple |
| chr7:87255156 | 7   | 87.25516 | 0.003831057 | Credible Set | purple |
| chr7:87389952 | 7   | 87.38995 | 0.003341701 | Credible Set | purple |

Fine-mapping Regions

| snp           | chr | pos (Mb) | pp          | group        | color  |
|---------------|-----|----------|-------------|--------------|--------|
| chr7:87389989 | 7   | 87.38999 | 0.006501179 | Credible Set | purple |
| chr7:87390014 | 7   | 87.39001 | 0.006521963 | Credible Set | purple |
| chr7:88888100 | 7   | 88.88810 | 0.001272919 | Credible Set | purple |
| chr7:88888124 | 7   | 88.88812 | 0.001272919 | Credible Set | purple |



F34 GBS, retic parameters hemoglobin distribution width, repeat

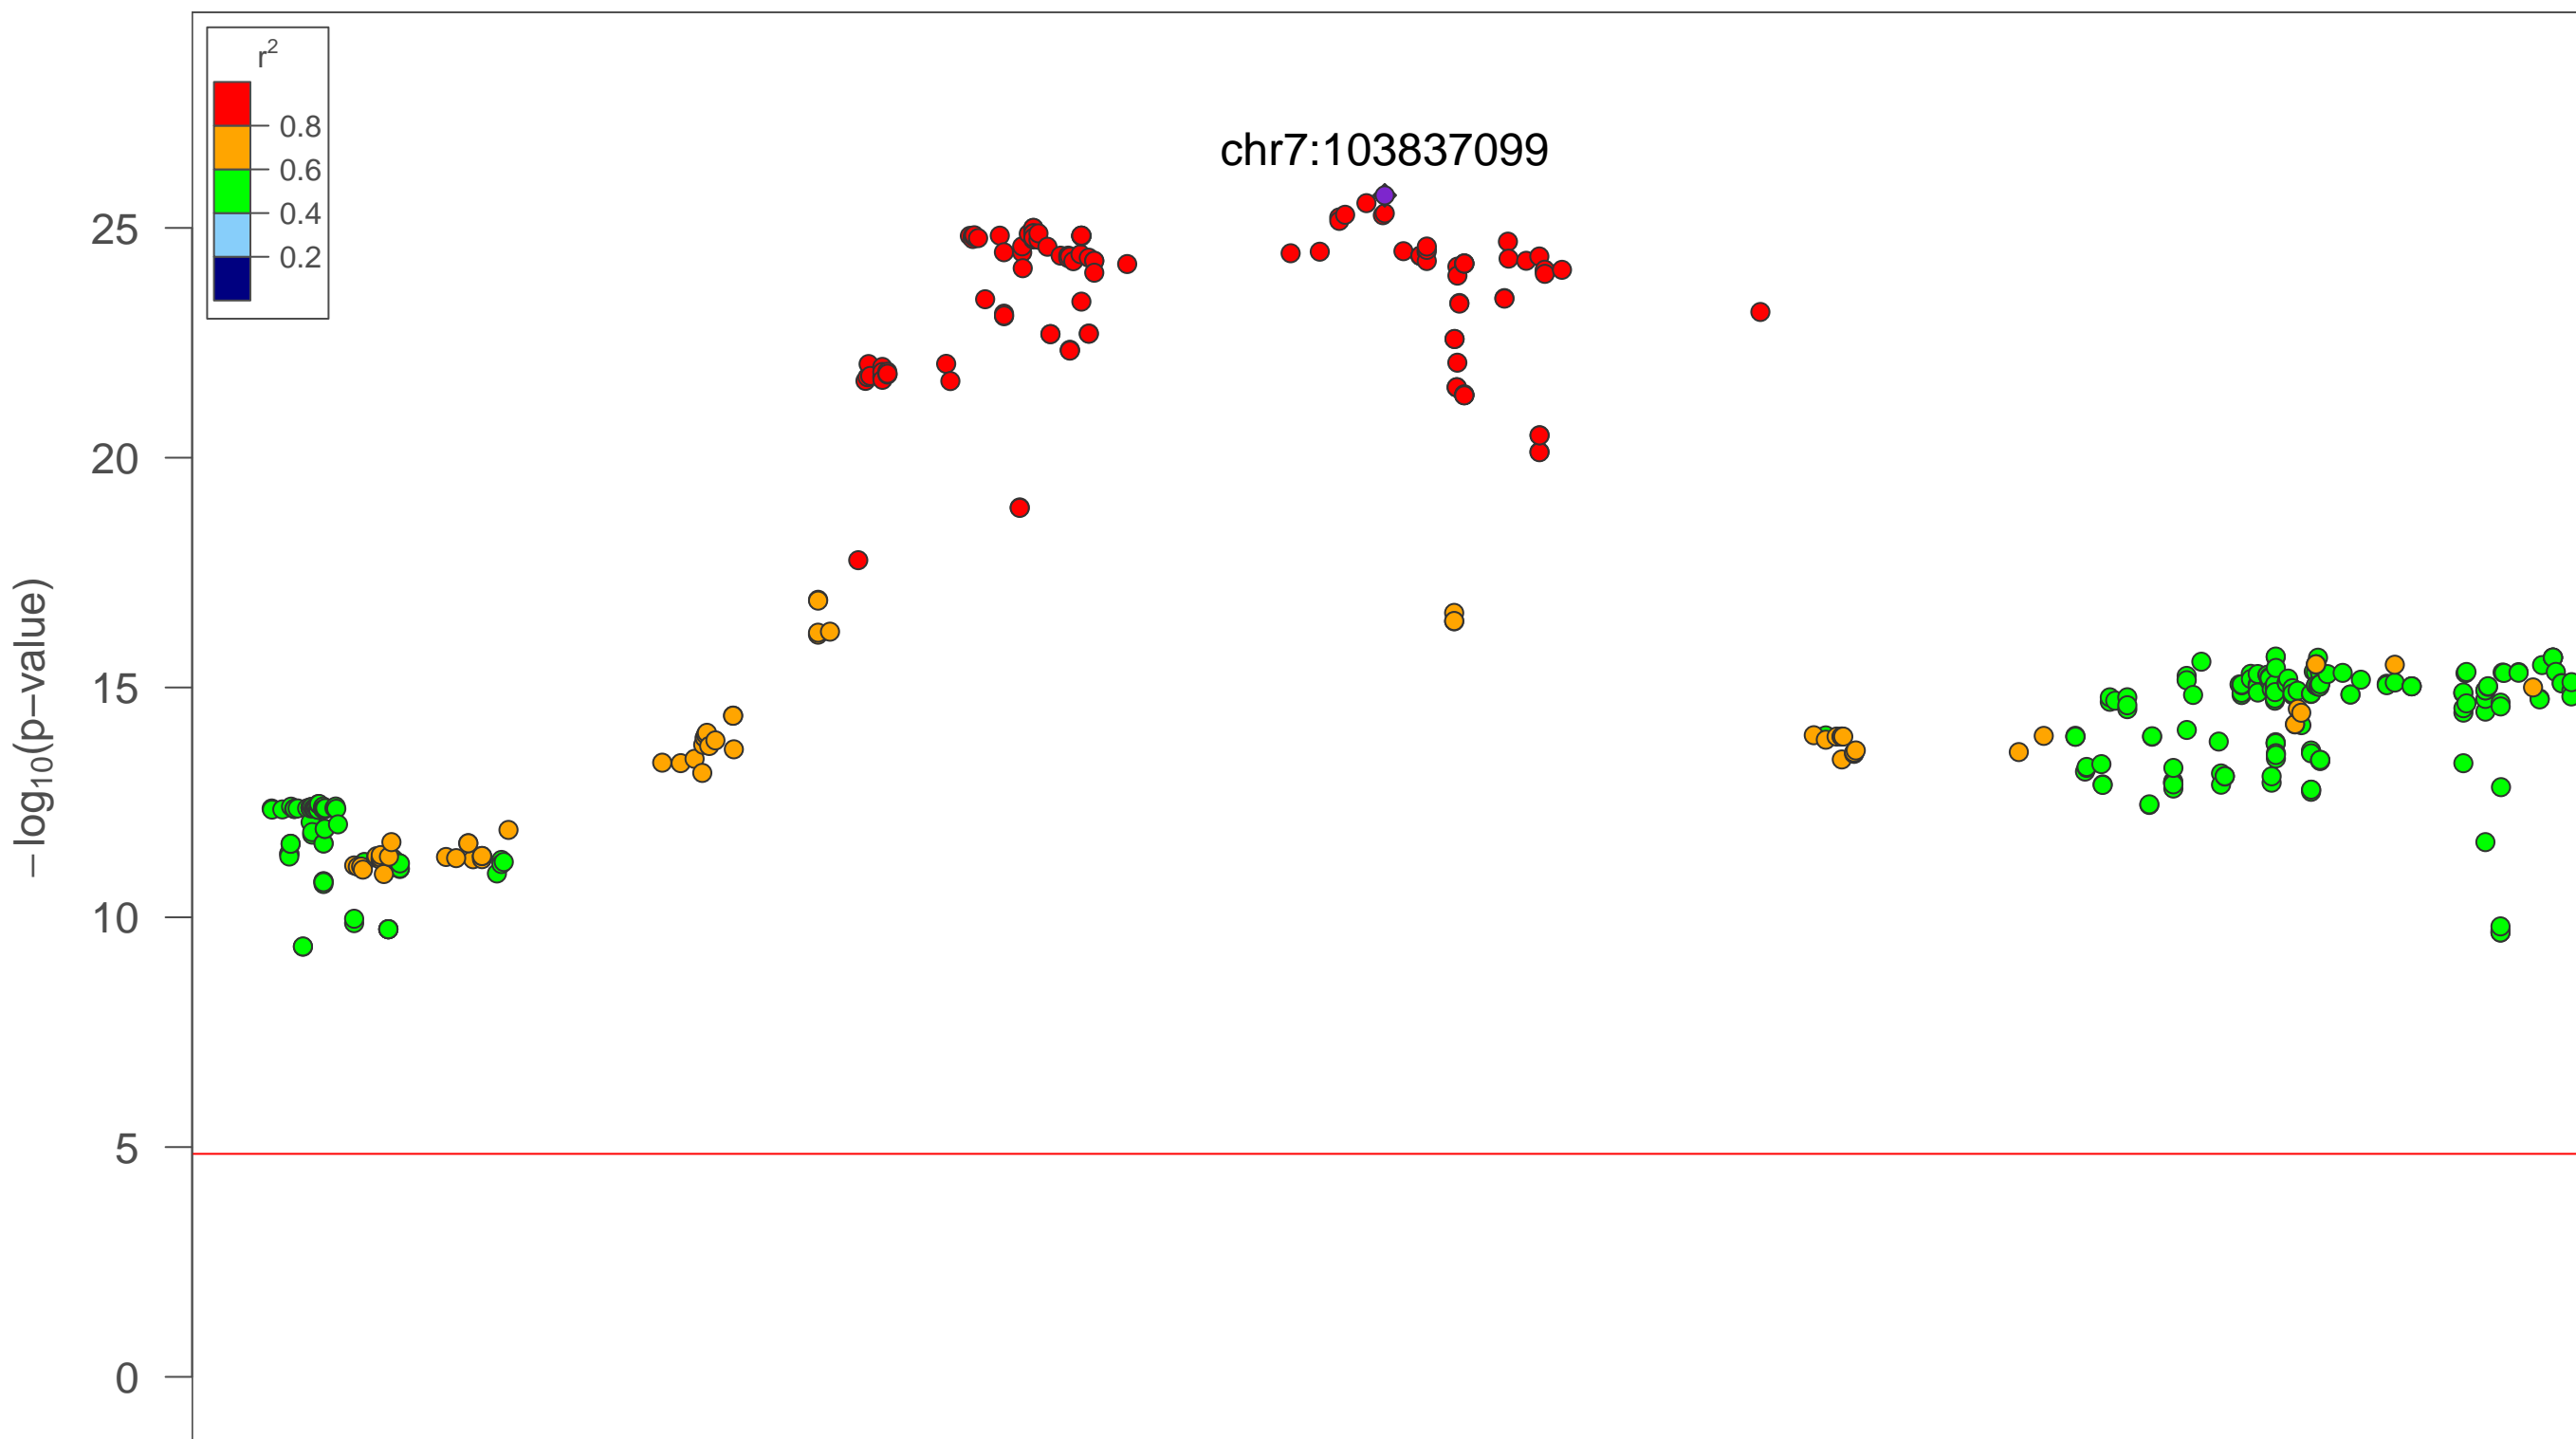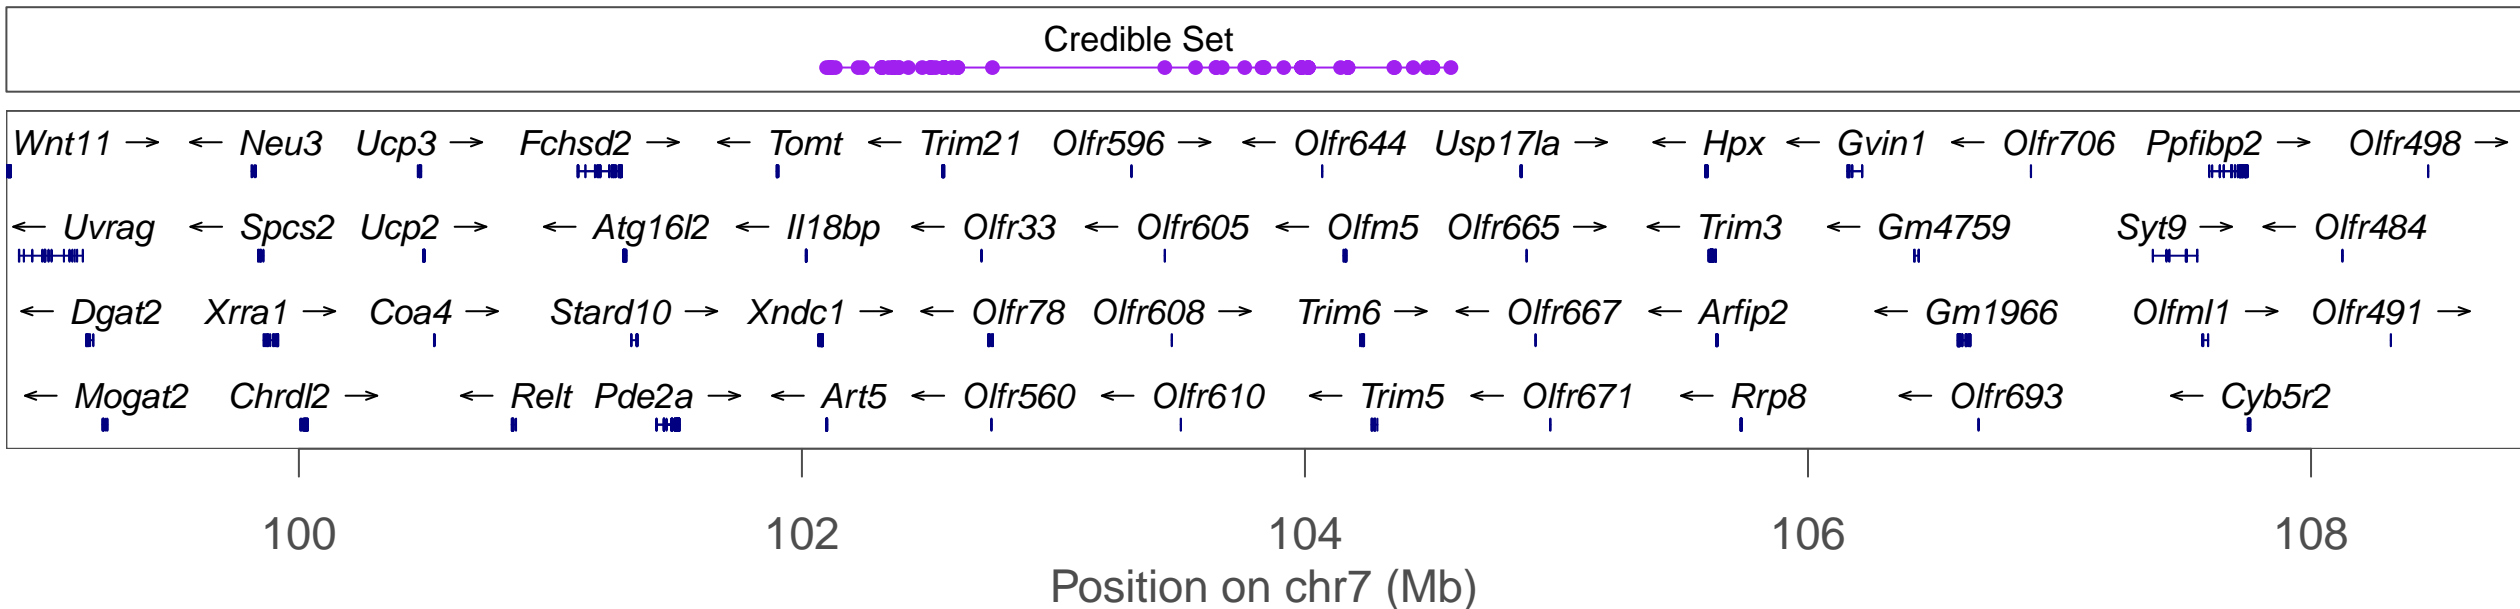

date: Thu Oct 25 17:11:03 2018

build: F34GBS

display range: chr7:98837099–108837099 [98837099–108837099]

hilite range: 0 – 0 [ 0 – 0 ]

reference SNP: chr7:103837099

number of SNPs plotted: 422

min P-value: 1.95E–26 [chr7:103837099]

max P-value: 4.36E–10 [chr7:99302296]

omitted Genes: Gm26705, Map6, Serpinh1

omitted Genes: Gdpd5, Khlh35, Rps3

omitted Genes: Snord15b, Snord15a, Arrb1

omitted Genes: Mir326, Tpbgl, Slco2b1

omitted Genes: Olfr520, Olfr521, Rnf169

omitted Genes: Pold3, Lipt2, Kcne3

omitted Genes: Pgm2l1, Gpx2-ps1, P4ha3

omitted Genes: Ppme1, C2cd3, Dnajb13

omitted Genes: Mrpl48, Rab6a, Plekhhb1

omitted Genes: Fam168a, Arhgef17, Mir3102

omitted Genes: P2ry6, P2ry2, Arap1

omitted Genes: Mir139, Art2a-ps, Art2b

omitted Genes: Clpb, Phox2a, Inpp1

omitted Genes: Folr2, Folr1, Anapc15

omitted Genes: Lamtor1, Lrrc51, Numa1

omitted Genes: Rnf121, Xntrpc, Trpc2

omitted Genes: Art1, Chrna10, Nup98

omitted Genes: Pgap2, Rhog, Stim1

omitted Genes: Rrm1, Olfr543, Olfr544

omitted Genes: Olfr545, Olfr547, Olfr549

omitted Genes: Olfr550, Olfr551, Olfr552

omitted Genes: Olfr553, Olfr554, Olfr555

omitted Genes: Olfr556, Trim68, Olfr557

omitted Genes: Olfr558, Olfr559, Olfr561

omitted Genes: Olfr564, Olfr566, Olfr568

omitted Genes: Olfr569, Olfr570, Olfr571

omitted Genes: Olfr572, Olfr574, Olfr575

omitted Genes: Olfr576, Olfr577, Olfr578

omitted Genes: Olfr582, Olfr583, Olfr584

omitted Genes: Olfr585, Olfr586, Olfr589

omitted Genes: Olfr591, Olfr592, Olfr593

omitted Genes: Olfr594, Ucp17ld, Olfr597

Make more plots at <http://csg.sph.umich.edu/locuszoom/>

## Fine-mapping Regions

| snp            | chr | pos (Mb) | pp          | group        | color  |
|----------------|-----|----------|-------------|--------------|--------|
| chr7:102098054 | 7   | 102.0981 | 0.015832258 | Credible Set | purple |
| chr7:102110109 | 7   | 102.1101 | 0.015679915 | Credible Set | purple |
| chr7:102110501 | 7   | 102.1105 | 0.013548429 | Credible Set | purple |
| chr7:102116318 | 7   | 102.1163 | 0.015078950 | Credible Set | purple |
| chr7:102116430 | 7   | 102.1164 | 0.015078950 | Credible Set | purple |
| chr7:102116478 | 7   | 102.1165 | 0.016308699 | Credible Set | purple |
| chr7:102132562 | 7   | 102.1326 | 0.014142236 | Credible Set | purple |
| chr7:102223396 | 7   | 102.2234 | 0.016016491 | Credible Set | purple |
| chr7:102240695 | 7   | 102.2407 | 0.007016629 | Credible Set | purple |
| chr7:102317213 | 7   | 102.3172 | 0.006918154 | Credible Set | purple |
| chr7:102317246 | 7   | 102.3172 | 0.009417055 | Credible Set | purple |
| chr7:102319586 | 7   | 102.3196 | 0.003176024 | Credible Set | purple |
| chr7:102344970 | 7   | 102.3450 | 0.017546832 | Credible Set | purple |
| chr7:102363897 | 7   | 102.3639 | 0.013224617 | Credible Set | purple |
| chr7:102364204 | 7   | 102.3642 | 0.023364889 | Credible Set | purple |
| chr7:102364223 | 7   | 102.3642 | 0.023594202 | Credible Set | purple |
| chr7:102364315 | 7   | 102.3643 | 0.017988068 | Credible Set | purple |
| chr7:102364326 | 7   | 102.3643 | 0.017988068 | Credible Set | purple |
| chr7:102364411 | 7   | 102.3644 | 0.014440388 | Credible Set | purple |
| chr7:102385520 | 7   | 102.3855 | 0.013034527 | Credible Set | purple |
| chr7:102385536 | 7   | 102.3855 | 0.017930915 | Credible Set | purple |
| chr7:102423165 | 7   | 102.4232 | 0.009215167 | Credible Set | purple |
| chr7:102478469 | 7   | 102.4785 | 0.005923028 | Credible Set | purple |
| chr7:102510475 | 7   | 102.5105 | 0.005932441 | Credible Set | purple |
| chr7:102510607 | 7   | 102.5106 | 0.005242781 | Credible Set | purple |
| chr7:102516878 | 7   | 102.5169 | 0.005652553 | Credible Set | purple |
| chr7:102531652 | 7   | 102.5317 | 0.004499354 | Credible Set | purple |
| chr7:102561708 | 7   | 102.5617 | 0.006361622 | Credible Set | purple |
| chr7:102565262 | 7   | 102.5653 | 0.015584216 | Credible Set | purple |
| chr7:102565292 | 7   | 102.5653 | 0.015993636 | Credible Set | purple |
| chr7:102565307 | 7   | 102.5653 | 0.015632984 | Credible Set | purple |
| chr7:102565323 | 7   | 102.5653 | 0.016043661 | Credible Set | purple |
| chr7:102565329 | 7   | 102.5653 | 0.016043661 | Credible Set | purple |
| chr7:102596442 | 7   | 102.5964 | 0.005353120 | Credible Set | purple |
| chr7:102619418 | 7   | 102.6194 | 0.004574513 | Credible Set | purple |
| chr7:102619431 | 7   | 102.6194 | 0.004584162 | Credible Set | purple |

## Fine-mapping Regions

| snp            | chr | pos (Mb) | pp          | group        | color  |
|----------------|-----|----------|-------------|--------------|--------|
| chr7:102619466 | 7   | 102.6195 | 0.002539171 | Credible Set | purple |
| chr7:102757499 | 7   | 102.7575 | 0.003908190 | Credible Set | purple |
| chr7:103442570 | 7   | 103.4426 | 0.006669963 | Credible Set | purple |
| chr7:103564836 | 7   | 103.5648 | 0.007212812 | Credible Set | purple |
| chr7:103646439 | 7   | 103.6464 | 0.039655634 | Credible Set | purple |
| chr7:103646709 | 7   | 103.6467 | 0.033269131 | Credible Set | purple |
| chr7:103671033 | 7   | 103.6710 | 0.045122825 | Credible Set | purple |
| chr7:103760301 | 7   | 103.7603 | 0.080303862 | Credible Set | purple |
| chr7:103829200 | 7   | 103.8292 | 0.044125024 | Credible Set | purple |
| chr7:103837099 | 7   | 103.8371 | 0.118562548 | Credible Set | purple |
| chr7:103837213 | 7   | 103.8372 | 0.048463508 | Credible Set | purple |
| chr7:103915503 | 7   | 103.9155 | 0.007395257 | Credible Set | purple |
| chr7:103986792 | 7   | 103.9868 | 0.005860667 | Credible Set | purple |
| chr7:103986795 | 7   | 103.9868 | 0.005860667 | Credible Set | purple |
| chr7:103986857 | 7   | 103.9869 | 0.005916115 | Credible Set | purple |
| chr7:103986860 | 7   | 103.9869 | 0.005916115 | Credible Set | purple |
| chr7:104012808 | 7   | 104.0128 | 0.007223316 | Credible Set | purple |
| chr7:104013370 | 7   | 104.0134 | 0.004539445 | Credible Set | purple |
| chr7:104013395 | 7   | 104.0134 | 0.007895879 | Credible Set | purple |
| chr7:104013467 | 7   | 104.0135 | 0.009328578 | Credible Set | purple |
| chr7:104141705 | 7   | 104.1417 | 0.003438599 | Credible Set | purple |
| chr7:104170588 | 7   | 104.1706 | 0.004024190 | Credible Set | purple |
| chr7:104170594 | 7   | 104.1706 | 0.003994168 | Credible Set | purple |
| chr7:104170618 | 7   | 104.1706 | 0.004003845 | Credible Set | purple |
| chr7:104170662 | 7   | 104.1707 | 0.004003845 | Credible Set | purple |
| chr7:104353491 | 7   | 104.3535 | 0.011885581 | Credible Set | purple |
| chr7:104356230 | 7   | 104.3562 | 0.005107791 | Credible Set | purple |
| chr7:104430205 | 7   | 104.4302 | 0.004595604 | Credible Set | purple |
| chr7:104485236 | 7   | 104.4852 | 0.005695110 | Credible Set | purple |
| chr7:104507724 | 7   | 104.5077 | 0.002769857 | Credible Set | purple |
| chr7:104508127 | 7   | 104.5081 | 0.002948166 | Credible Set | purple |
| chr7:104508173 | 7   | 104.5082 | 0.002399265 | Credible Set | purple |
| chr7:104580091 | 7   | 104.5801 | 0.002936084 | Credible Set | purple |

F34 GBS, coat color, albino

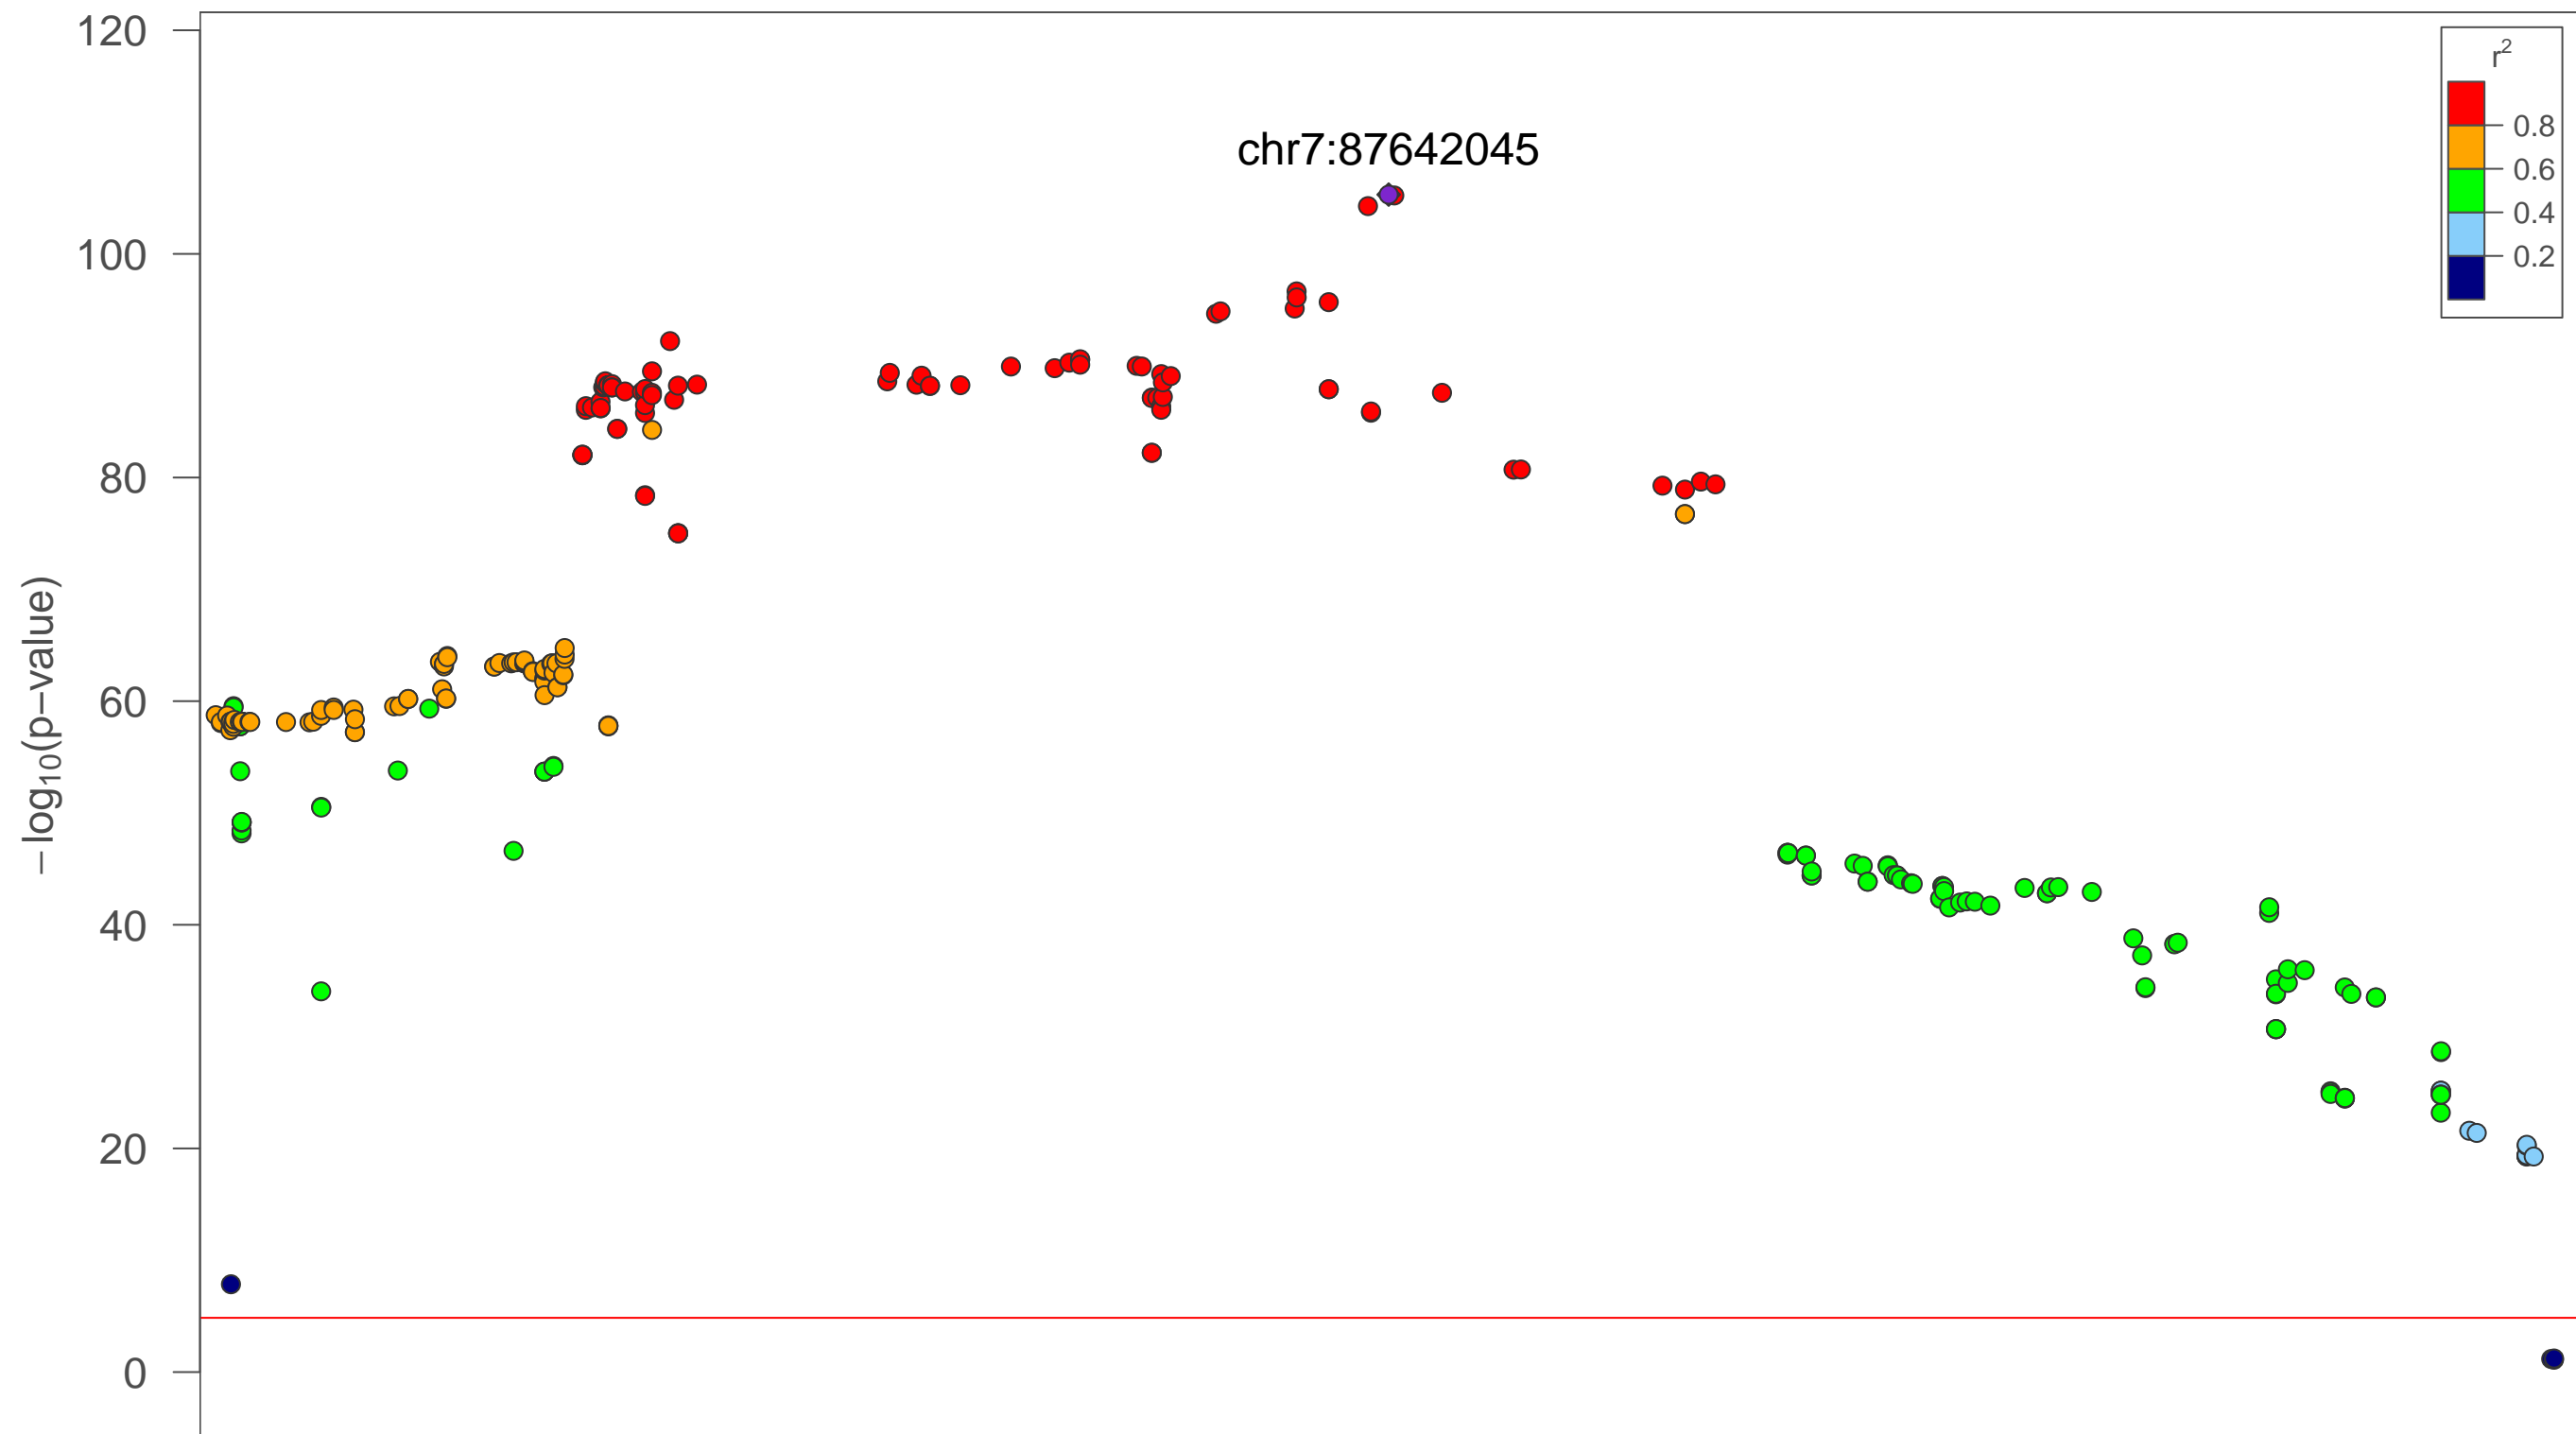

Credible Set

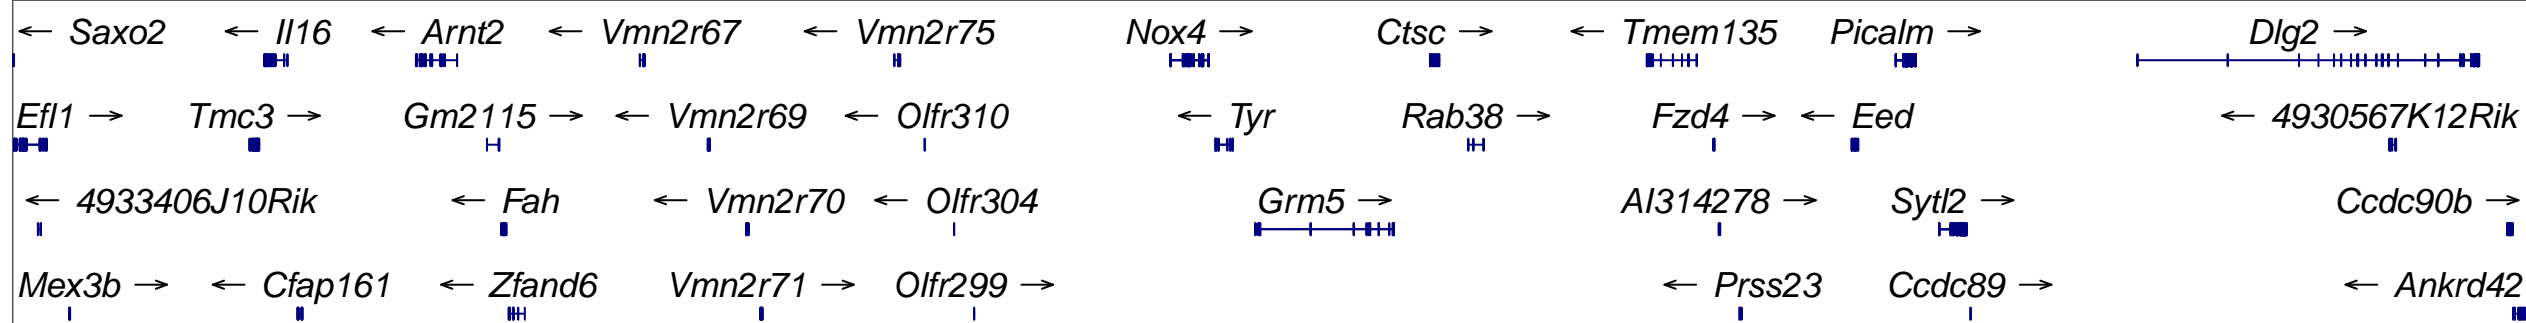

41 genes  
omitted

date: Thu Oct 25 17:13:07 2018  
build: F34GBS  
display range: chr7:82642045–92642045 [82642045–92642045]  
hilite range: 0 – 0 [ 0 – 0 ]  
reference SNP: chr7:87642045  
number of SNPs plotted: 282  
min P-value: 5E–106 [chr7:87642045]  
max P-value: 7.84E–2 [chr7:92543164]  
omitted Genes: 4933430H16Rik, Stard5, Mesdc1  
omitted Genes: Mesdc2, Cemip, Abhd17c  
omitted Genes: 2610206C17Rik, Olfr291, Olfr290  
omitted Genes: Vmn2r65, Vmn2r66, Vmn2r68  
omitted Genes: Vmn2r72, Vmn2r73, Vmn2r74  
omitted Genes: Vmn2r76, Olfr309, Olfr308  
omitted Genes: Olfr307, Olfr305, Olfr303  
omitted Genes: Olfr301, Olfr298, Olfr297  
omitted Genes: Olfr295, Olfr294, Olfr293  
omitted Genes: Olfr292, Folh1, Vmn2r77  
omitted Genes: Vmn2r78, Vmn2r79, Me3  
omitted Genes: Ccdc81, l7Rn6, E230029C05Rik  
omitted Genes: 2310010J17Rik, Ccdc83, Crebzf  
omitted Genes: Tmem126a, Tmem126b

Fine-mapping Regions

| snp           | chr | pos (Mb) | pp         | group        | color  |
|---------------|-----|----------|------------|--------------|--------|
| chr7:87554961 | 7   | 87.55496 | 0.04890514 | Credible Set | purple |
| chr7:87642045 | 7   | 87.64204 | 0.51626891 | Credible Set | purple |
| chr7:87665727 | 7   | 87.66573 | 0.43482595 | Credible Set | purple |

F34 GBS, coat color, agouti

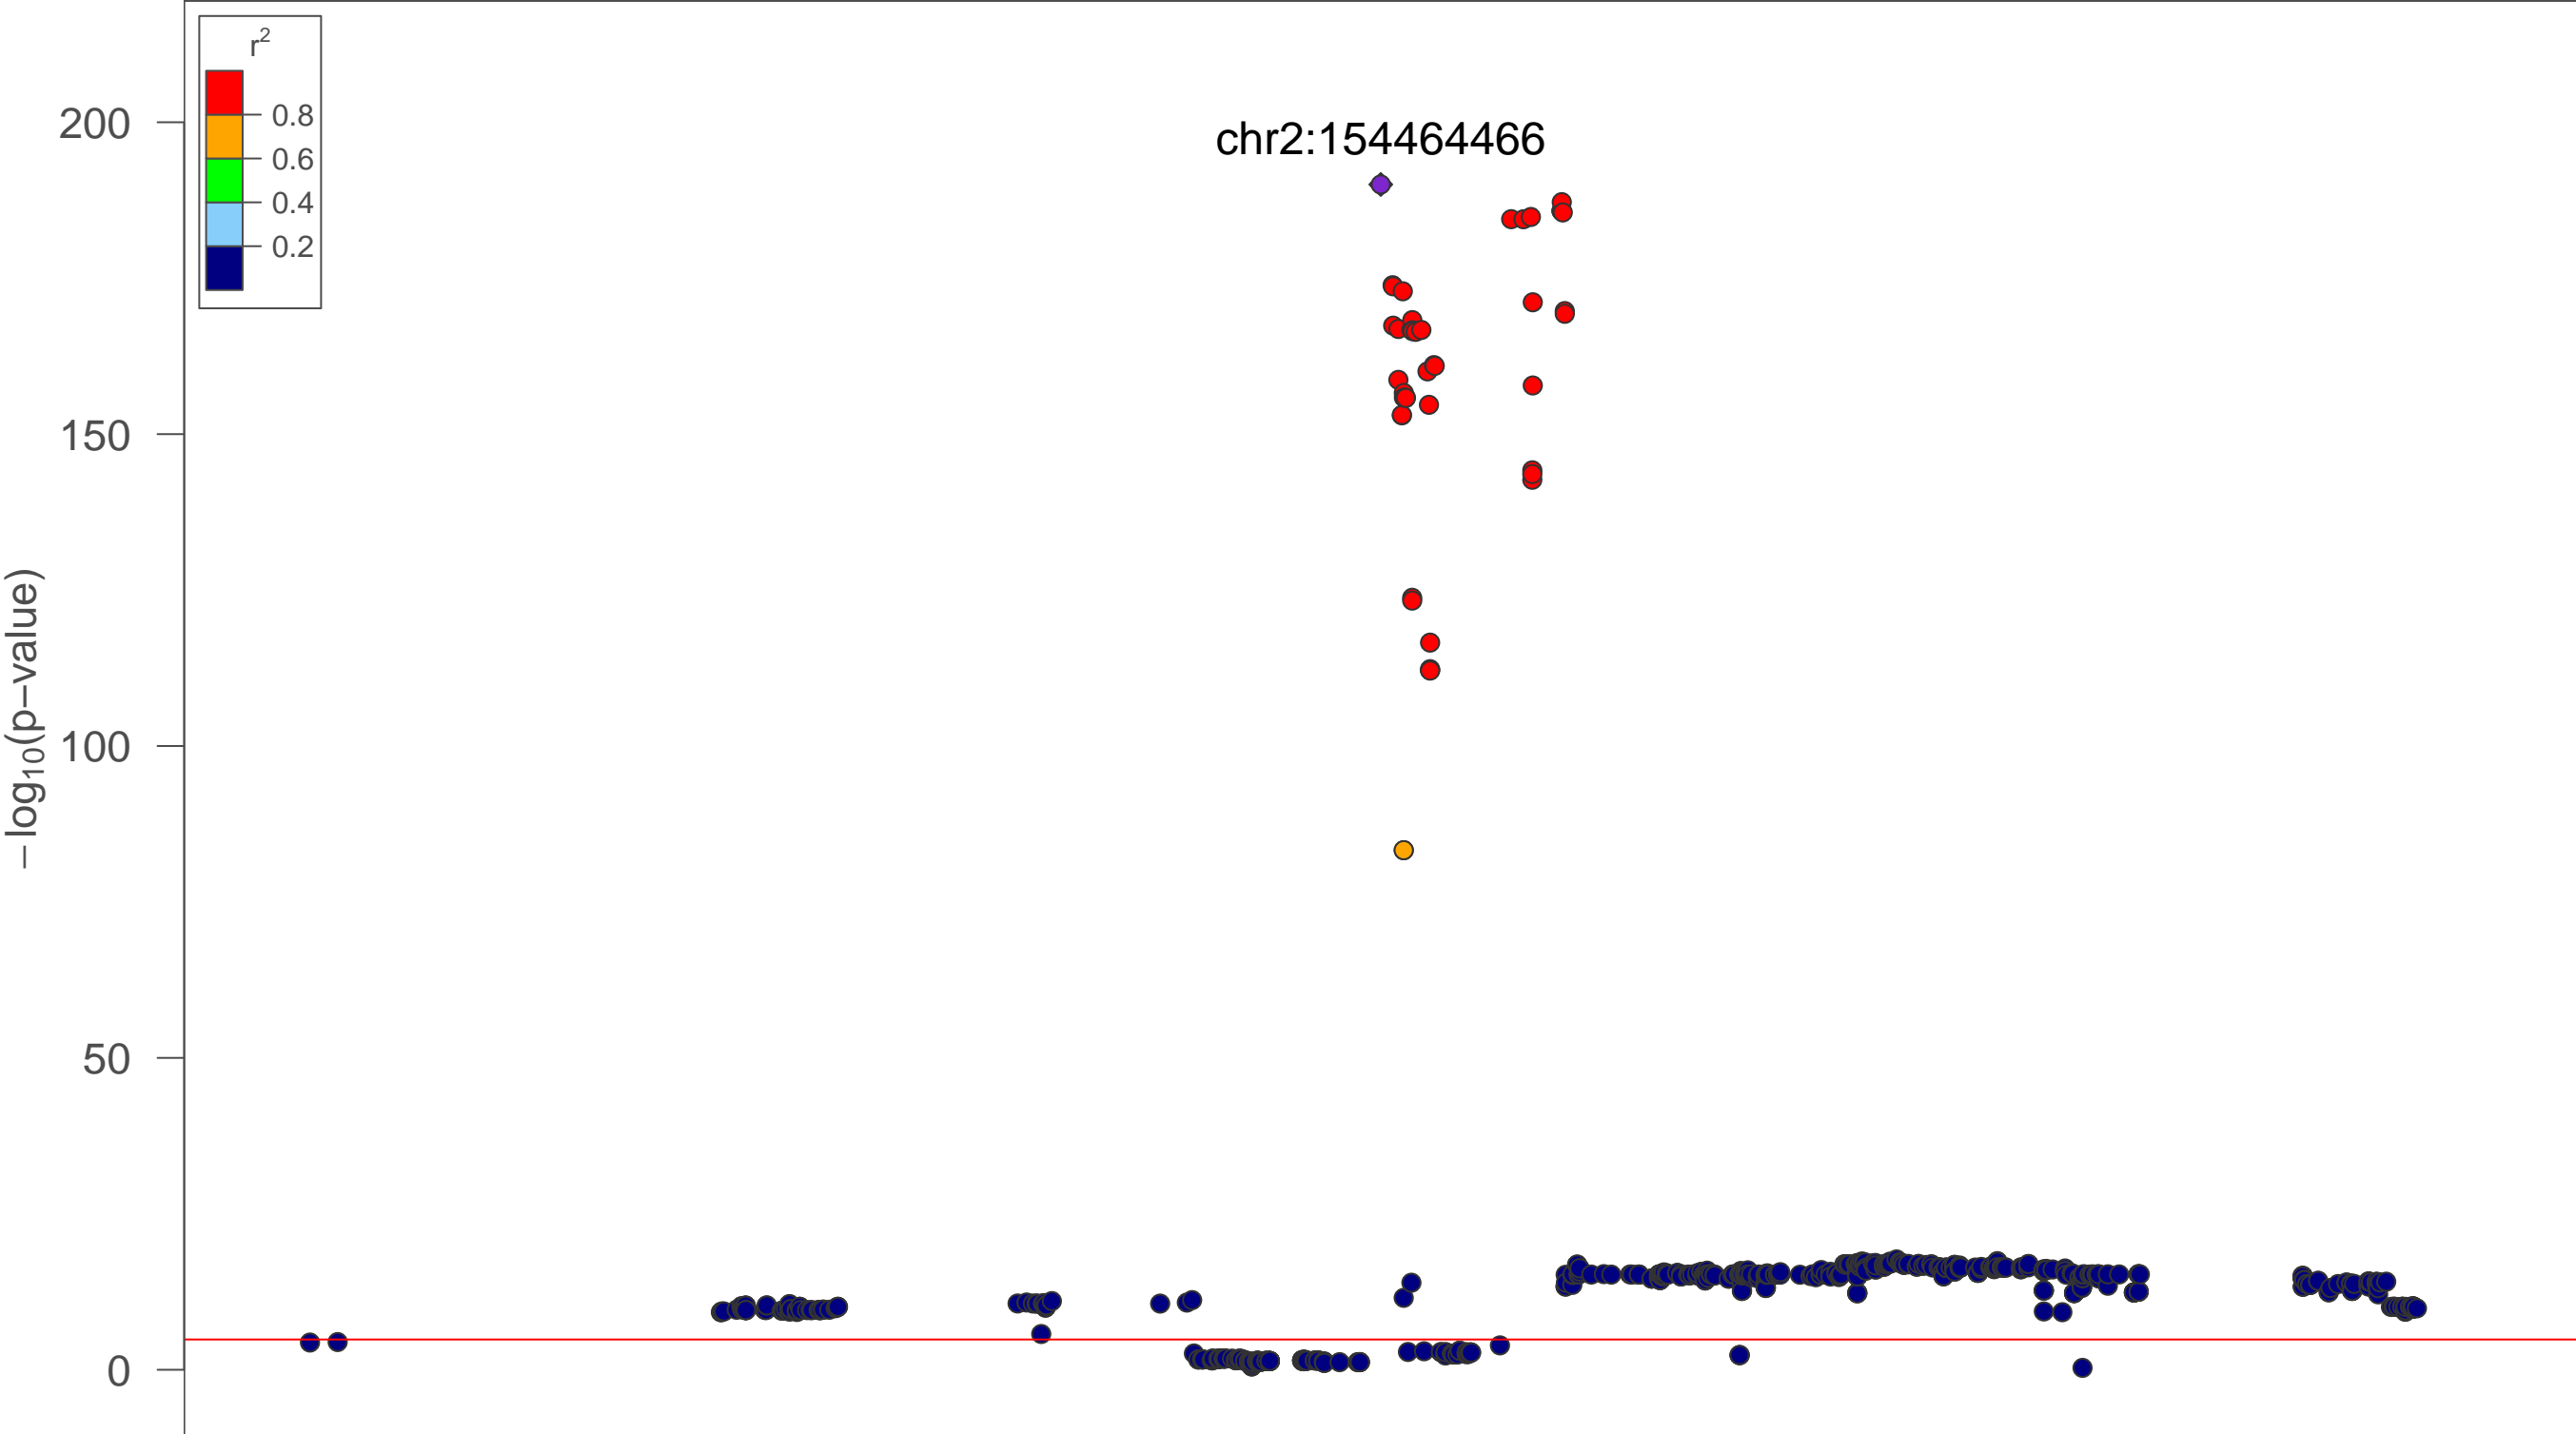

Credible Set

*Syndig1* → ← *Vsx1* *Nsfl1c* → *Tbc1d20* → *Xkr7* → *Mapre1* → ← *Necab3* ← *Pigu* ← *Gdf5* *Aar2* → ← *Rbl1* *Vstm2l* → *Actr5* →  
← *Zfp120* *Pygb* → *Fkbp1a* → ← *Rbck1* *Ttll9* → *Dnmt3b* → ← *Snta1* *a* → ← *Ggt7* ← *Nfs1* *Myl9* → *Src* → ← *Tti1* *Ppp1r16b* →  
*Gm14139* → ← *Ninl* ← *Snph* ← *Trib3* ← *Pdrg1* *Efcab8* → *Actl10* → *Itch* → *Procr* → *Epb41l1* → ← *Mroh8* *Rprd1b* → *Dhx35* →  
*Zfp937* → *Gins1* → ← *Rad21l* ← *Nrsn2* *Ccm2l* → ← *Sun5* ← *E2f1* *Dynlrb1* → *Ergic3* → *Tgif2* → ← *Blcap* *Bpi* →

145 genes  
omitted

Position on chr2 (Mb)



date: Thu Oct 25 17:13:18 2018

build: F34GBS

display range: chr2:149464466–159464466 [149464466–159464466]

hilite range: 0 – 0 [ 0 – 0 ]

reference SNP: chr2:154464466

number of SNPs plotted: 748

min P-value: 9.43E–191 [chr2:154464466]

max P-value: 4.9E–1 [chr2:157396497]

omitted Genes: Gm14124, 3300002I08Rik, Zfp442

omitted Genes: Zfp345, Cst7, Apmap

omitted Genes: Acss1, E130215H24Rik, Entpd6

omitted Genes: Abhd12, Nanp, Gm14151

omitted Genes: 4930442J19Rik, LOC100125594, 4921509C19Rik

omitted Genes: Sdcbp2, Tmem74b, Psmf1

omitted Genes: Rspo4, Angpt4, Mir1953

omitted Genes: Fam110a, Slc52a3, Scrt2

omitted Genes: Srxn1, Tcf15, Csnk2a1

omitted Genes: Gm14164, Sox12, Zcchc3

omitted Genes: 6820408C15Rik, Defb23, Defb20

omitted Genes: Defb22, Defb26, Defb28

omitted Genes: Defb29, Defb21, Defb19

omitted Genes: Defb45, Defb36, Defb25

omitted Genes: Rem1, H13, Mcts2

omitted Genes: Id1, Cox4i2, Bcl2l1

omitted Genes: Tpx2, Mir5622, Mylk2

omitted Genes: Foxs1, Dusp15, Hck

omitted Genes: Tm9sf4, Tspyl3, Plagl2

omitted Genes: Pofut1, Kif3b, 2500004C02Rik

omitted Genes: Asxl1, Nol4l, Commd7

omitted Genes: Bpifb2, Bpifb6, Bpifb3

omitted Genes: Bpifb4, Bpifa6, Bpifa2

omitted Genes: Bpifa3, Bpifa1, Bpifa5

omitted Genes: Bpifb1, Bpifb5, Bpifb9a

omitted Genes: Bpifb9b, Cdk5rap1, Cbfa2t2

omitted Genes: 1700003F12Rik, Pxmp4, Zfp341

omitted Genes: Chmp4b, Raly, Eif2s2

omitted Genes: Ahcy, 2310005A03Rik, Map1lc3a

omitted Genes: Mir695, Trp53inp2, Ncoa6

omitted Genes: Acss2, Acss2os, Gss

omitted Genes: Myh7b, Mir499, Trnc4ap

Make more plots at <http://csg.sph.umich.edu/locuszoom/>

Fine-mapping Regions

| snp            | chr | pos (Mb) | pp        | group        | color  |
|----------------|-----|----------|-----------|--------------|--------|
| chr2:154464466 | 2   | 154.4645 | 0.9982817 | Credible Set | purple |

F34 GBS, open field, distance travelled in periphery (cm)

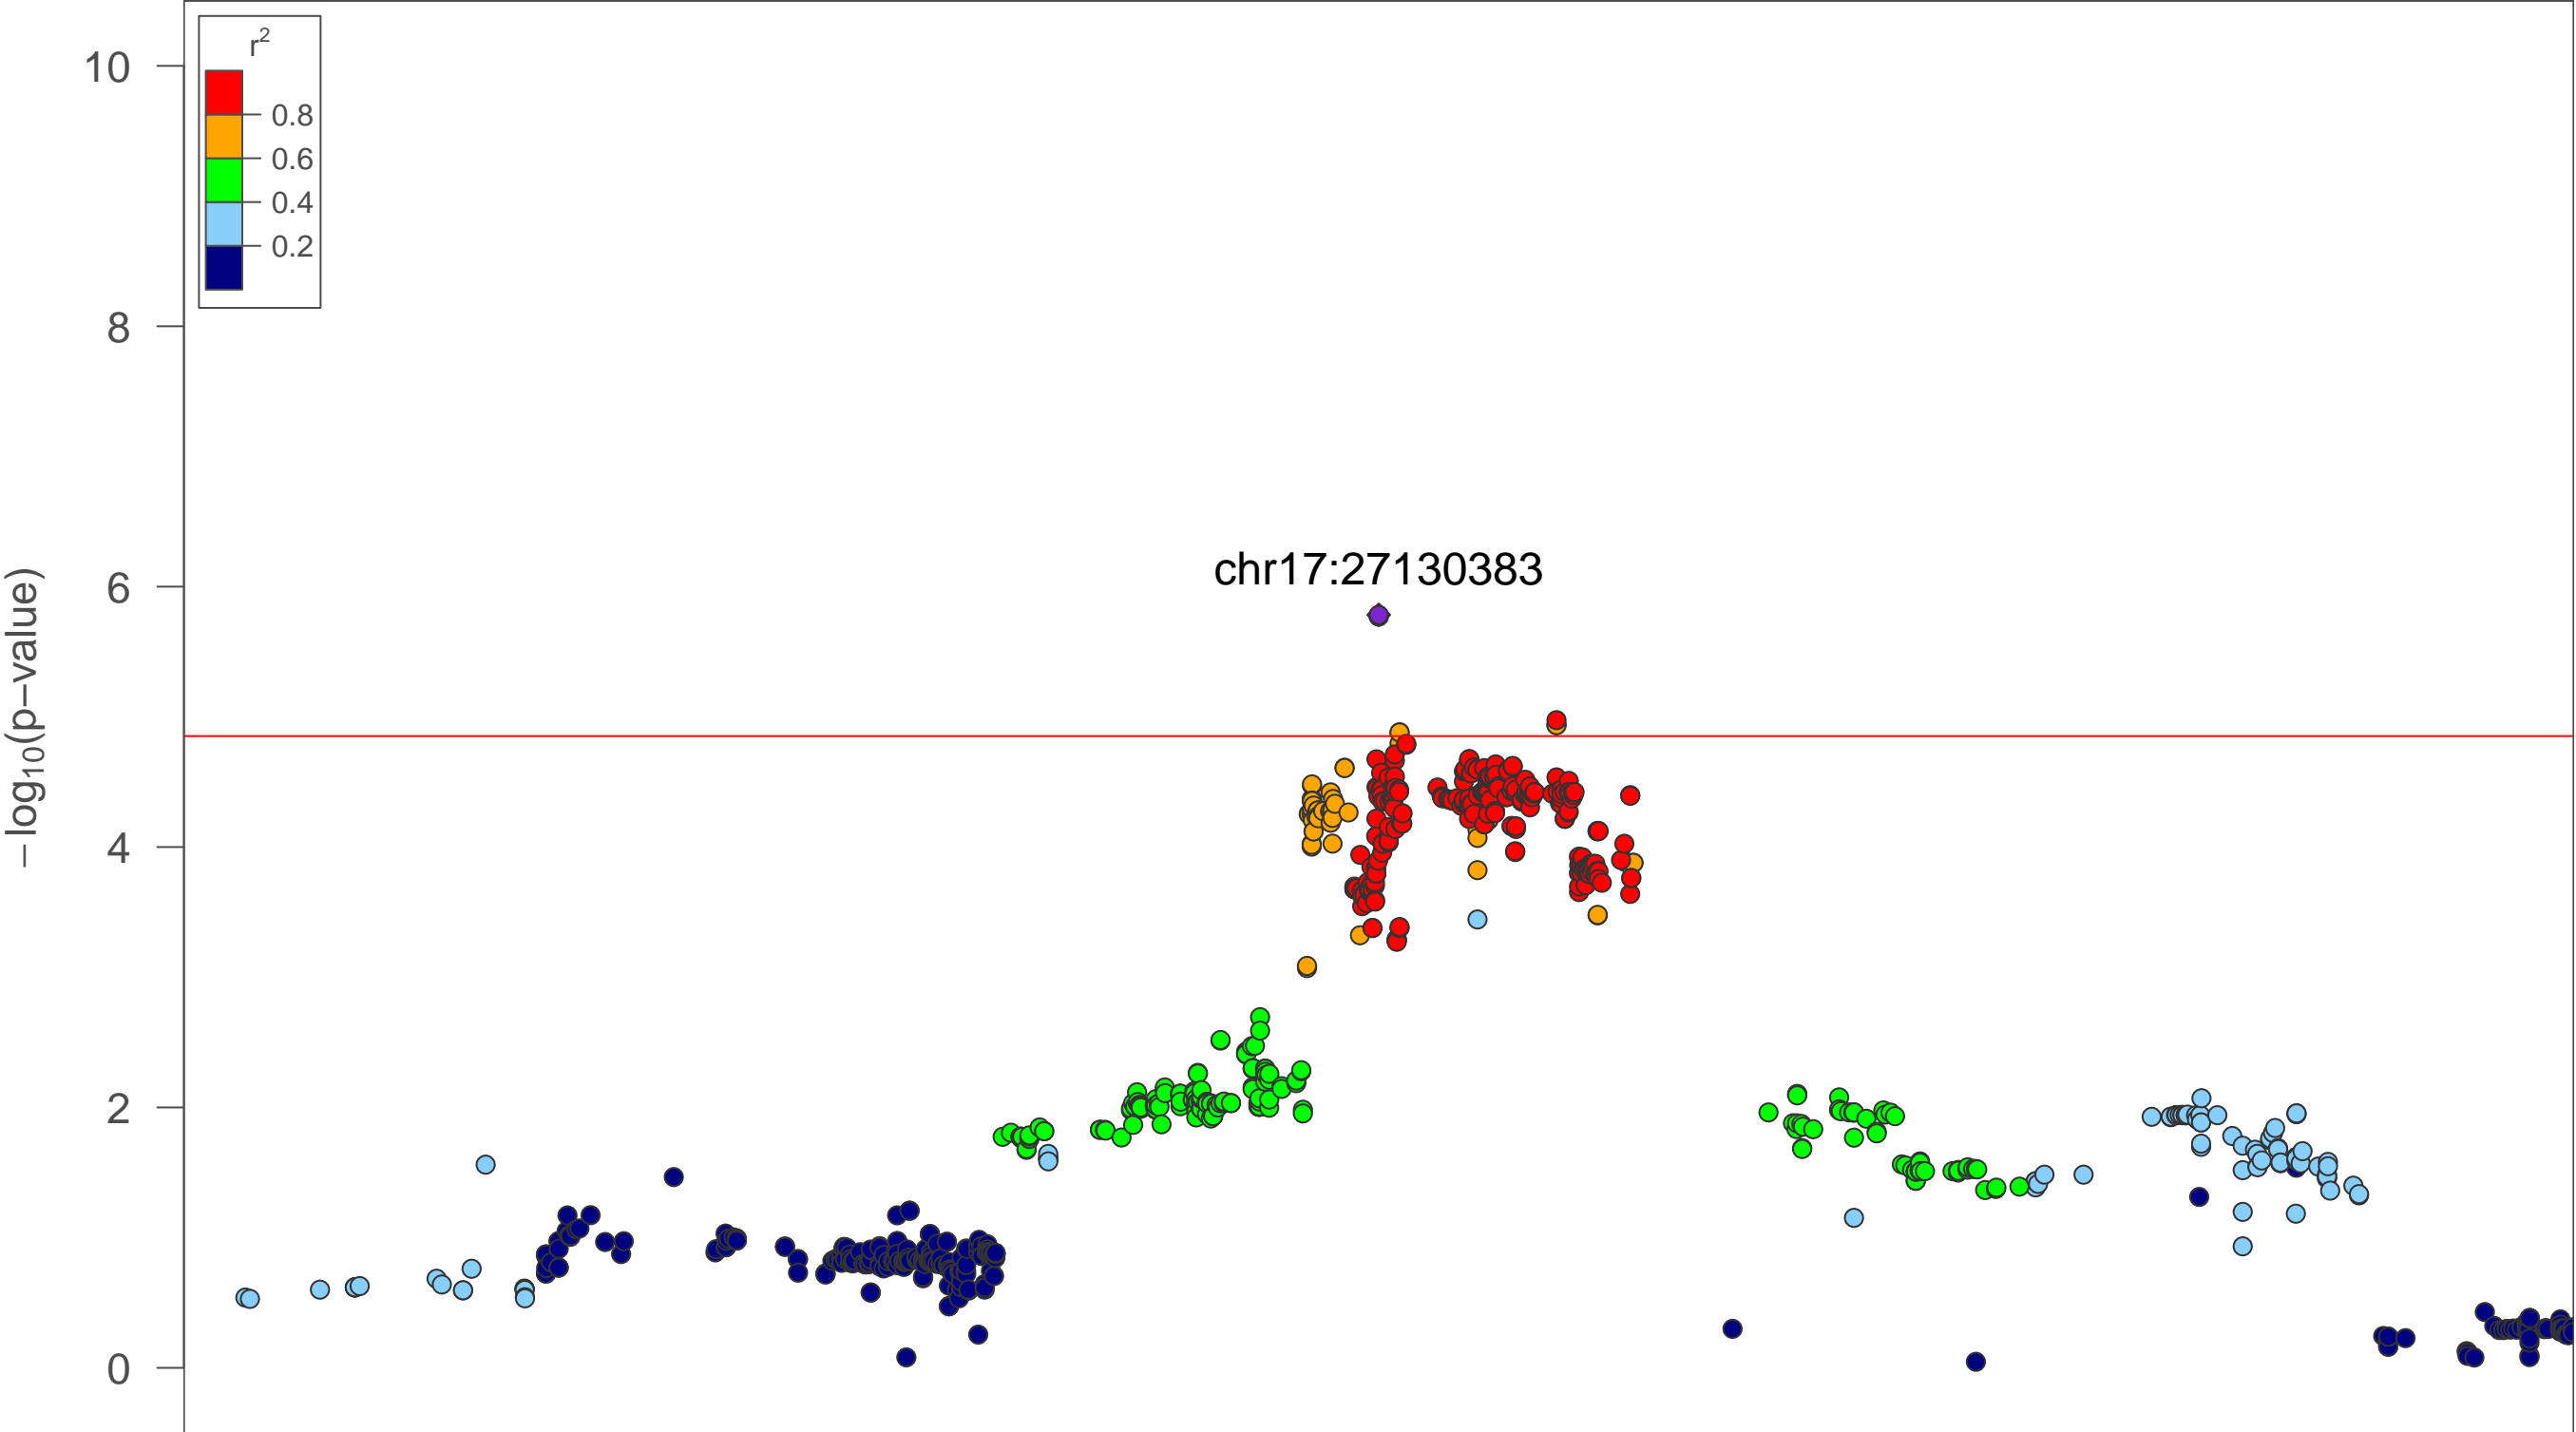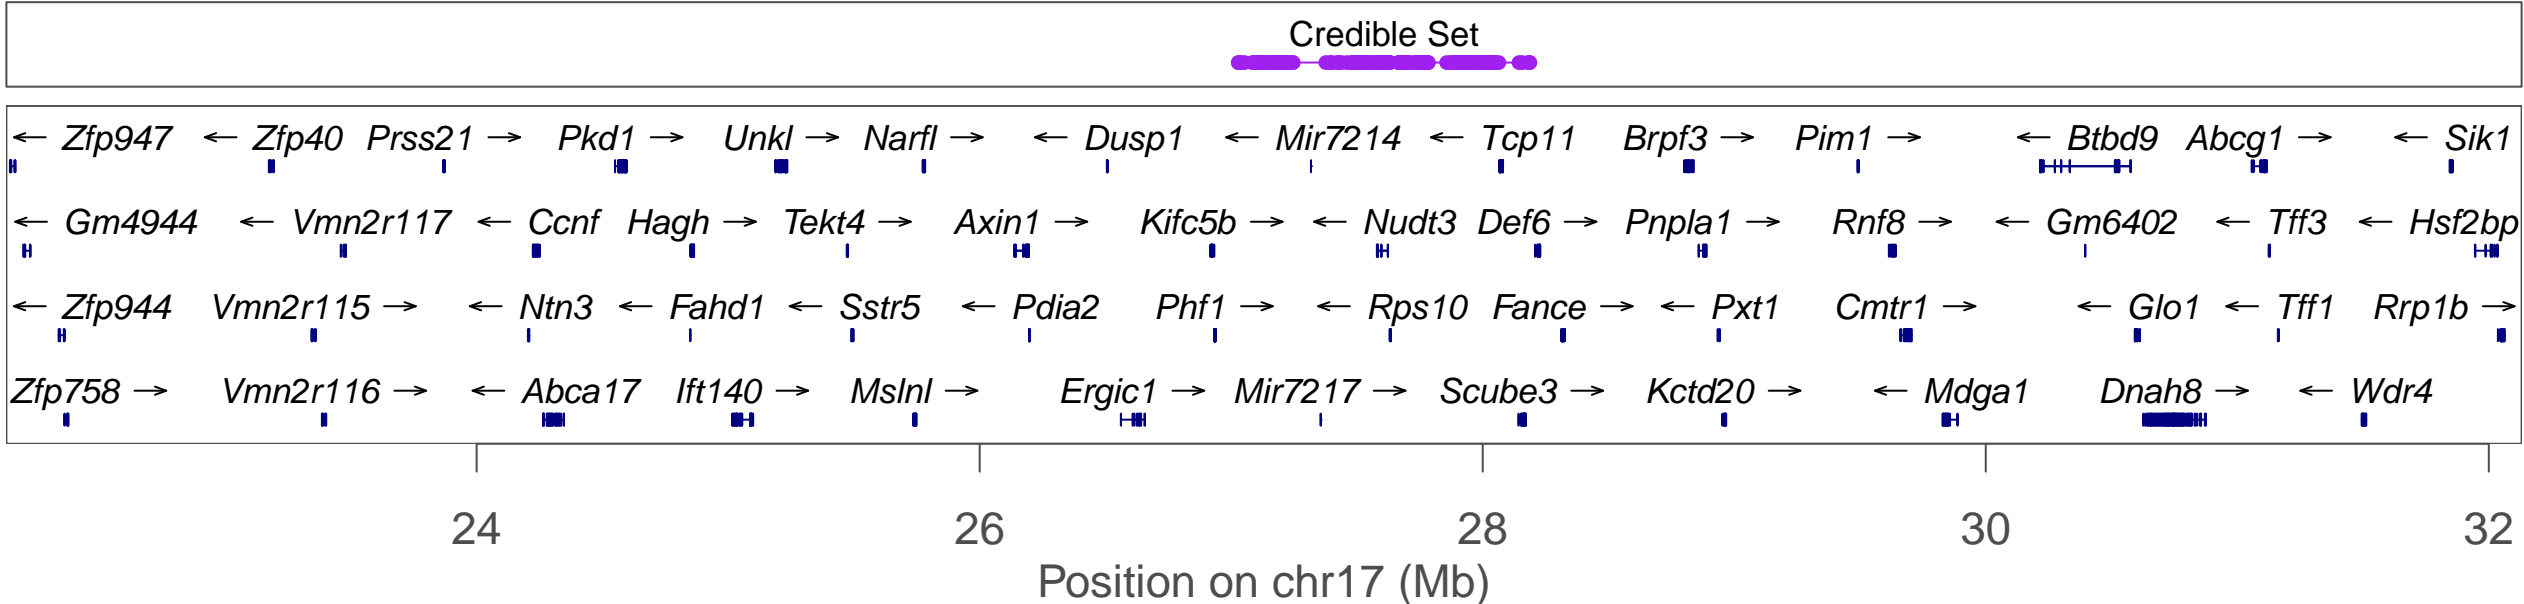



## Fine-mapping Regions

| snp            | chr | pos (Mb) | pp           | group        | color  |
|----------------|-----|----------|--------------|--------------|--------|
| chr17:27028210 | 17  | 27.02821 | 0.0006905196 | Credible Set | purple |
| chr17:27028984 | 17  | 27.02898 | 0.0006622292 | Credible Set | purple |
| chr17:27035894 | 17  | 27.03589 | 0.0006679480 | Credible Set | purple |
| chr17:27038183 | 17  | 27.03818 | 0.0006708332 | Credible Set | purple |
| chr17:27053285 | 17  | 27.05328 | 0.0011704250 | Credible Set | purple |
| chr17:27083567 | 17  | 27.08357 | 0.0007396722 | Credible Set | purple |
| chr17:27090253 | 17  | 27.09025 | 0.0006679941 | Credible Set | purple |
| chr17:27090308 | 17  | 27.09031 | 0.0006625982 | Credible Set | purple |
| chr17:27092250 | 17  | 27.09225 | 0.0006679236 | Credible Set | purple |
| chr17:27099867 | 17  | 27.09987 | 0.0009607726 | Credible Set | purple |
| chr17:27100129 | 17  | 27.10013 | 0.0007180446 | Credible Set | purple |
| chr17:27104557 | 17  | 27.10456 | 0.0006643762 | Credible Set | purple |
| chr17:27114211 | 17  | 27.11421 | 0.0007016296 | Credible Set | purple |
| chr17:27114427 | 17  | 27.11443 | 0.0007430355 | Credible Set | purple |
| chr17:27119229 | 17  | 27.11923 | 0.0009431507 | Credible Set | purple |
| chr17:27119262 | 17  | 27.11926 | 0.0009350070 | Credible Set | purple |
| chr17:27119650 | 17  | 27.11965 | 0.0016022245 | Credible Set | purple |
| chr17:27119751 | 17  | 27.11975 | 0.0008576135 | Credible Set | purple |
| chr17:27119767 | 17  | 27.11977 | 0.0008532212 | Credible Set | purple |
| chr17:27119789 | 17  | 27.11979 | 0.0008576565 | Credible Set | purple |
| chr17:27120639 | 17  | 27.12064 | 0.0021446983 | Credible Set | purple |
| chr17:27120789 | 17  | 27.12079 | 0.0058109205 | Credible Set | purple |
| chr17:27120982 | 17  | 27.12098 | 0.0036397830 | Credible Set | purple |
| chr17:27124710 | 17  | 27.12471 | 0.0036067340 | Credible Set | purple |
| chr17:27127355 | 17  | 27.12736 | 0.0010606908 | Credible Set | purple |
| chr17:27129483 | 17  | 27.12948 | 0.0031674687 | Credible Set | purple |
| chr17:27129530 | 17  | 27.12953 | 0.0031098902 | Credible Set | purple |
| chr17:27130351 | 17  | 27.13035 | 0.0655034163 | Credible Set | purple |
| chr17:27130379 | 17  | 27.13038 | 0.0650354071 | Credible Set | purple |
| chr17:27130383 | 17  | 27.13038 | 0.0668860613 | Credible Set | purple |
| chr17:27130402 | 17  | 27.13040 | 0.0663849614 | Credible Set | purple |
| chr17:27139266 | 17  | 27.13927 | 0.0035516860 | Credible Set | purple |
| chr17:27140390 | 17  | 27.14039 | 0.0046340897 | Credible Set | purple |
| chr17:27143270 | 17  | 27.14327 | 0.0035863041 | Credible Set | purple |
| chr17:27143279 | 17  | 27.14328 | 0.0035118431 | Credible Set | purple |
| chr17:27143309 | 17  | 27.14331 | 0.0035118431 | Credible Set | purple |

## Fine-mapping Regions

| snp            | chr | pos (Mb) | pp          | group        | color  |
|----------------|-----|----------|-------------|--------------|--------|
| chr17:27143399 | 17  | 27.14340 | 0.003172901 | Credible Set | purple |
| chr17:27144798 | 17  | 27.14480 | 0.001214051 | Credible Set | purple |
| chr17:27146163 | 17  | 27.14616 | 0.002860352 | Credible Set | purple |
| chr17:27146360 | 17  | 27.14636 | 0.001412914 | Credible Set | purple |
| chr17:27146370 | 17  | 27.14637 | 0.001412914 | Credible Set | purple |
| chr17:27156143 | 17  | 27.15614 | 0.002889728 | Credible Set | purple |
| chr17:27171213 | 17  | 27.17121 | 0.004283235 | Credible Set | purple |
| chr17:27171685 | 17  | 27.17169 | 0.001593529 | Credible Set | purple |
| chr17:27171811 | 17  | 27.17181 | 0.001441306 | Credible Set | purple |
| chr17:27171813 | 17  | 27.17181 | 0.001480138 | Credible Set | purple |
| chr17:27172497 | 17  | 27.17250 | 0.001865232 | Credible Set | purple |
| chr17:27174542 | 17  | 27.17454 | 0.002877318 | Credible Set | purple |
| chr17:27184013 | 17  | 27.18401 | 0.003011507 | Credible Set | purple |
| chr17:27188020 | 17  | 27.18802 | 0.003018626 | Credible Set | purple |
| chr17:27188575 | 17  | 27.18858 | 0.002968736 | Credible Set | purple |
| chr17:27191517 | 17  | 27.19152 | 0.003559769 | Credible Set | purple |
| chr17:27191542 | 17  | 27.19154 | 0.003689981 | Credible Set | purple |
| chr17:27191945 | 17  | 27.19195 | 0.003307282 | Credible Set | purple |
| chr17:27193635 | 17  | 27.19364 | 0.003334340 | Credible Set | purple |
| chr17:27194000 | 17  | 27.19400 | 0.003052373 | Credible Set | purple |
| chr17:27195141 | 17  | 27.19514 | 0.003586952 | Credible Set | purple |
| chr17:27195293 | 17  | 27.19529 | 0.002622497 | Credible Set | purple |
| chr17:27195309 | 17  | 27.19531 | 0.002565096 | Credible Set | purple |
| chr17:27195731 | 17  | 27.19573 | 0.003445560 | Credible Set | purple |
| chr17:27195769 | 17  | 27.19577 | 0.003557021 | Credible Set | purple |
| chr17:27196042 | 17  | 27.19604 | 0.003417150 | Credible Set | purple |
| chr17:27197618 | 17  | 27.19762 | 0.003400012 | Credible Set | purple |
| chr17:27197752 | 17  | 27.19775 | 0.005670945 | Credible Set | purple |
| chr17:27197791 | 17  | 27.19779 | 0.006310012 | Credible Set | purple |
| chr17:27197888 | 17  | 27.19789 | 0.004344106 | Credible Set | purple |
| chr17:27200193 | 17  | 27.20019 | 0.001802654 | Credible Set | purple |
| chr17:27200651 | 17  | 27.20065 | 0.003594198 | Credible Set | purple |
| chr17:27215443 | 17  | 27.21544 | 0.003497046 | Credible Set | purple |
| chr17:27215484 | 17  | 27.21548 | 0.003359707 | Credible Set | purple |
| chr17:27223950 | 17  | 27.22395 | 0.001996354 | Credible Set | purple |
| chr17:27224285 | 17  | 27.22428 | 0.001976200 | Credible Set | purple |

## Fine-mapping Regions

| snp            | chr | pos (Mb) | pp          | group        | color  |
|----------------|-----|----------|-------------|--------------|--------|
| chr17:27227746 | 17  | 27.22775 | 0.001980280 | Credible Set | purple |
| chr17:27228977 | 17  | 27.22898 | 0.001973063 | Credible Set | purple |
| chr17:27230139 | 17  | 27.23014 | 0.002345358 | Credible Set | purple |
| chr17:27245666 | 17  | 27.24567 | 0.007424828 | Credible Set | purple |
| chr17:27245737 | 17  | 27.24574 | 0.007536836 | Credible Set | purple |
| chr17:27376234 | 17  | 27.37623 | 0.003618079 | Credible Set | purple |
| chr17:27393680 | 17  | 27.39368 | 0.003122487 | Credible Set | purple |
| chr17:27397461 | 17  | 27.39746 | 0.003069704 | Credible Set | purple |
| chr17:27397469 | 17  | 27.39747 | 0.003016427 | Credible Set | purple |
| chr17:27419536 | 17  | 27.41954 | 0.002970358 | Credible Set | purple |
| chr17:27428199 | 17  | 27.42820 | 0.002948887 | Credible Set | purple |
| chr17:27428246 | 17  | 27.42825 | 0.002947730 | Credible Set | purple |
| chr17:27437777 | 17  | 27.43778 | 0.002896468 | Credible Set | purple |
| chr17:27459951 | 17  | 27.45995 | 0.003030526 | Credible Set | purple |
| chr17:27475870 | 17  | 27.47587 | 0.002657809 | Credible Set | purple |
| chr17:27486422 | 17  | 27.48642 | 0.002808491 | Credible Set | purple |
| chr17:27486466 | 17  | 27.48647 | 0.002782808 | Credible Set | purple |
| chr17:27486535 | 17  | 27.48653 | 0.002937368 | Credible Set | purple |
| chr17:27486605 | 17  | 27.48661 | 0.002937368 | Credible Set | purple |
| chr17:27486642 | 17  | 27.48664 | 0.002937368 | Credible Set | purple |
| chr17:27486705 | 17  | 27.48671 | 0.002848904 | Credible Set | purple |
| chr17:27486720 | 17  | 27.48672 | 0.002939042 | Credible Set | purple |
| chr17:27486902 | 17  | 27.48690 | 0.003999480 | Credible Set | purple |
| chr17:27486957 | 17  | 27.48696 | 0.004749891 | Credible Set | purple |
| chr17:27492720 | 17  | 27.49272 | 0.004829780 | Credible Set | purple |
| chr17:27492775 | 17  | 27.49278 | 0.004951286 | Credible Set | purple |
| chr17:27507520 | 17  | 27.50752 | 0.002705067 | Credible Set | purple |
| chr17:27507982 | 17  | 27.50798 | 0.002902714 | Credible Set | purple |
| chr17:27508332 | 17  | 27.50833 | 0.002136315 | Credible Set | purple |
| chr17:27509007 | 17  | 27.50901 | 0.005797119 | Credible Set | purple |
| chr17:27509013 | 17  | 27.50901 | 0.005791401 | Credible Set | purple |
| chr17:27509015 | 17  | 27.50902 | 0.005835558 | Credible Set | purple |
| chr17:27509253 | 17  | 27.50925 | 0.003007173 | Credible Set | purple |
| chr17:27517180 | 17  | 27.51718 | 0.002751952 | Credible Set | purple |
| chr17:27517282 | 17  | 27.51728 | 0.004603356 | Credible Set | purple |
| chr17:27517332 | 17  | 27.51733 | 0.004587039 | Credible Set | purple |

## Fine-mapping Regions

| snp            | chr | pos (Mb) | pp          | group        | color  |
|----------------|-----|----------|-------------|--------------|--------|
| chr17:27520735 | 17  | 27.52073 | 0.002748236 | Credible Set | purple |
| chr17:27528952 | 17  | 27.52895 | 0.005080409 | Credible Set | purple |
| chr17:27529039 | 17  | 27.52904 | 0.002319879 | Credible Set | purple |
| chr17:27543951 | 17  | 27.54395 | 0.004917564 | Credible Set | purple |
| chr17:27543956 | 17  | 27.54396 | 0.004930713 | Credible Set | purple |
| chr17:27543999 | 17  | 27.54400 | 0.004880749 | Credible Set | purple |
| chr17:27544604 | 17  | 27.54460 | 0.003168622 | Credible Set | purple |
| chr17:27564093 | 17  | 27.56409 | 0.003352451 | Credible Set | purple |
| chr17:27564105 | 17  | 27.56411 | 0.003352451 | Credible Set | purple |
| chr17:27571562 | 17  | 27.57156 | 0.003344775 | Credible Set | purple |
| chr17:27571636 | 17  | 27.57164 | 0.001950998 | Credible Set | purple |
| chr17:27571643 | 17  | 27.57164 | 0.001950998 | Credible Set | purple |
| chr17:27571700 | 17  | 27.57170 | 0.005012142 | Credible Set | purple |
| chr17:27572004 | 17  | 27.57200 | 0.003371118 | Credible Set | purple |
| chr17:27580805 | 17  | 27.58081 | 0.003349890 | Credible Set | purple |
| chr17:27581132 | 17  | 27.58113 | 0.003368510 | Credible Set | purple |
| chr17:27587053 | 17  | 27.58705 | 0.004286323 | Credible Set | purple |
| chr17:27587087 | 17  | 27.58709 | 0.004261357 | Credible Set | purple |
| chr17:27587178 | 17  | 27.58718 | 0.003875413 | Credible Set | purple |
| chr17:27587179 | 17  | 27.58718 | 0.003875413 | Credible Set | purple |
| chr17:27587180 | 17  | 27.58718 | 0.003875413 | Credible Set | purple |
| chr17:27587187 | 17  | 27.58719 | 0.003875413 | Credible Set | purple |
| chr17:27587188 | 17  | 27.58719 | 0.003875413 | Credible Set | purple |
| chr17:27587192 | 17  | 27.58719 | 0.003875413 | Credible Set | purple |
| chr17:27587496 | 17  | 27.58750 | 0.004352865 | Credible Set | purple |
| chr17:27587576 | 17  | 27.58758 | 0.002329053 | Credible Set | purple |
| chr17:27590733 | 17  | 27.59073 | 0.003468632 | Credible Set | purple |
| chr17:27590765 | 17  | 27.59077 | 0.003241280 | Credible Set | purple |
| chr17:27590778 | 17  | 27.59078 | 0.003351669 | Credible Set | purple |
| chr17:27590796 | 17  | 27.59080 | 0.003354960 | Credible Set | purple |
| chr17:27596229 | 17  | 27.59623 | 0.002935597 | Credible Set | purple |
| chr17:27596270 | 17  | 27.59627 | 0.002935317 | Credible Set | purple |
| chr17:27596658 | 17  | 27.59666 | 0.004164313 | Credible Set | purple |
| chr17:27596666 | 17  | 27.59667 | 0.004279920 | Credible Set | purple |
| chr17:27596669 | 17  | 27.59667 | 0.004412048 | Credible Set | purple |
| chr17:27597174 | 17  | 27.59717 | 0.004340178 | Credible Set | purple |



## Fine-mapping Regions

| snp            | chr | pos (Mb) | pp          | group        | color  |
|----------------|-----|----------|-------------|--------------|--------|
| chr17:27612703 | 17  | 27.61270 | 0.004305540 | Credible Set | purple |
| chr17:27613227 | 17  | 27.61323 | 0.004387607 | Credible Set | purple |
| chr17:27613228 | 17  | 27.61323 | 0.004394670 | Credible Set | purple |
| chr17:27616766 | 17  | 27.61677 | 0.002437642 | Credible Set | purple |
| chr17:27616769 | 17  | 27.61677 | 0.002408529 | Credible Set | purple |
| chr17:27617069 | 17  | 27.61707 | 0.002351613 | Credible Set | purple |
| chr17:27619823 | 17  | 27.61982 | 0.005331907 | Credible Set | purple |
| chr17:27621865 | 17  | 27.62186 | 0.004478968 | Credible Set | purple |
| chr17:27630316 | 17  | 27.63032 | 0.003688785 | Credible Set | purple |
| chr17:27630364 | 17  | 27.63036 | 0.003610154 | Credible Set | purple |
| chr17:27630797 | 17  | 27.63080 | 0.003566265 | Credible Set | purple |
| chr17:27665592 | 17  | 27.66559 | 0.003077830 | Credible Set | purple |
| chr17:27665593 | 17  | 27.66559 | 0.003083298 | Credible Set | purple |
| chr17:27665645 | 17  | 27.66565 | 0.003083298 | Credible Set | purple |
| chr17:27671877 | 17  | 27.67188 | 0.004880048 | Credible Set | purple |
| chr17:27671883 | 17  | 27.67188 | 0.004759104 | Credible Set | purple |
| chr17:27686117 | 17  | 27.68612 | 0.003396868 | Credible Set | purple |
| chr17:27686262 | 17  | 27.68626 | 0.001893958 | Credible Set | purple |
| chr17:27686263 | 17  | 27.68626 | 0.001893958 | Credible Set | purple |
| chr17:27690758 | 17  | 27.69076 | 0.003696990 | Credible Set | purple |
| chr17:27690904 | 17  | 27.69090 | 0.005126885 | Credible Set | purple |
| chr17:27690906 | 17  | 27.69091 | 0.005200503 | Credible Set | purple |
| chr17:27701425 | 17  | 27.70143 | 0.001227921 | Credible Set | purple |
| chr17:27701456 | 17  | 27.70146 | 0.001243876 | Credible Set | purple |
| chr17:27701864 | 17  | 27.70186 | 0.003349890 | Credible Set | purple |
| chr17:27702067 | 17  | 27.70207 | 0.003336597 | Credible Set | purple |
| chr17:27704331 | 17  | 27.70433 | 0.003499133 | Credible Set | purple |
| chr17:27704567 | 17  | 27.70457 | 0.001803896 | Credible Set | purple |
| chr17:27704630 | 17  | 27.70463 | 0.001888245 | Credible Set | purple |
| chr17:27728842 | 17  | 27.72884 | 0.002851367 | Credible Set | purple |
| chr17:27728885 | 17  | 27.72888 | 0.002934453 | Credible Set | purple |
| chr17:27728889 | 17  | 27.72889 | 0.002952041 | Credible Set | purple |
| chr17:27728897 | 17  | 27.72890 | 0.002934453 | Credible Set | purple |
| chr17:27743592 | 17  | 27.74359 | 0.003192428 | Credible Set | purple |
| chr17:27743637 | 17  | 27.74364 | 0.004117684 | Credible Set | purple |
| chr17:27748732 | 17  | 27.74873 | 0.003225522 | Credible Set | purple |

## Fine-mapping Regions

| snp            | chr | pos (Mb) | pp          | group        | color  |
|----------------|-----|----------|-------------|--------------|--------|
| chr17:27748758 | 17  | 27.74876 | 0.003377620 | Credible Set | purple |
| chr17:27761092 | 17  | 27.76109 | 0.003389158 | Credible Set | purple |
| chr17:27761141 | 17  | 27.76114 | 0.003367948 | Credible Set | purple |
| chr17:27761632 | 17  | 27.76163 | 0.003350055 | Credible Set | purple |
| chr17:27762683 | 17  | 27.76268 | 0.003481436 | Credible Set | purple |
| chr17:27762853 | 17  | 27.76285 | 0.003122038 | Credible Set | purple |
| chr17:27763066 | 17  | 27.76307 | 0.003682703 | Credible Set | purple |
| chr17:27763276 | 17  | 27.76328 | 0.002590740 | Credible Set | purple |
| chr17:27771695 | 17  | 27.77170 | 0.003067641 | Credible Set | purple |
| chr17:27778534 | 17  | 27.77853 | 0.003265639 | Credible Set | purple |
| chr17:27782597 | 17  | 27.78260 | 0.003343349 | Credible Set | purple |
| chr17:27782890 | 17  | 27.78289 | 0.003344144 | Credible Set | purple |
| chr17:27782953 | 17  | 27.78295 | 0.003344144 | Credible Set | purple |
| chr17:27856821 | 17  | 27.85682 | 0.003255148 | Credible Set | purple |
| chr17:27874099 | 17  | 27.87410 | 0.004287132 | Credible Set | purple |
| chr17:27874161 | 17  | 27.87416 | 0.011245136 | Credible Set | purple |
| chr17:27878639 | 17  | 27.87864 | 0.003368408 | Credible Set | purple |
| chr17:27889423 | 17  | 27.88942 | 0.002781855 | Credible Set | purple |
| chr17:27889454 | 17  | 27.88945 | 0.002783606 | Credible Set | purple |
| chr17:27894408 | 17  | 27.89441 | 0.002759443 | Credible Set | purple |
| chr17:27894461 | 17  | 27.89446 | 0.002743438 | Credible Set | purple |
| chr17:27894647 | 17  | 27.89465 | 0.003489548 | Credible Set | purple |
| chr17:27894825 | 17  | 27.89483 | 0.003009436 | Credible Set | purple |
| chr17:27895648 | 17  | 27.89565 | 0.003226592 | Credible Set | purple |
| chr17:27908870 | 17  | 27.90887 | 0.003346538 | Credible Set | purple |
| chr17:27909014 | 17  | 27.90901 | 0.002139331 | Credible Set | purple |
| chr17:27909047 | 17  | 27.90905 | 0.002137497 | Credible Set | purple |
| chr17:27909083 | 17  | 27.90908 | 0.002154310 | Credible Set | purple |
| chr17:27924683 | 17  | 27.92468 | 0.002380880 | Credible Set | purple |
| chr17:27924726 | 17  | 27.92473 | 0.002423893 | Credible Set | purple |
| chr17:27925657 | 17  | 27.92566 | 0.004041239 | Credible Set | purple |
| chr17:27925757 | 17  | 27.92576 | 0.003349890 | Credible Set | purple |
| chr17:27925847 | 17  | 27.92585 | 0.003349890 | Credible Set | purple |
| chr17:27929518 | 17  | 27.92952 | 0.003212652 | Credible Set | purple |
| chr17:27938148 | 17  | 27.93815 | 0.003001811 | Credible Set | purple |
| chr17:27945251 | 17  | 27.94525 | 0.003188269 | Credible Set | purple |

## Fine-mapping Regions

| snp            | chr | pos (Mb) | pp           | group        | color  |
|----------------|-----|----------|--------------|--------------|--------|
| chr17:27945722 | 17  | 27.94572 | 0.0033441442 | Credible Set | purple |
| chr17:27945734 | 17  | 27.94573 | 0.0033441442 | Credible Set | purple |
| chr17:27945792 | 17  | 27.94579 | 0.0033498899 | Credible Set | purple |
| chr17:27949604 | 17  | 27.94960 | 0.0033498899 | Credible Set | purple |
| chr17:27967905 | 17  | 27.96790 | 0.0008648146 | Credible Set | purple |
| chr17:27968095 | 17  | 27.96810 | 0.0011365013 | Credible Set | purple |
| chr17:27968486 | 17  | 27.96849 | 0.0006912941 | Credible Set | purple |
| chr17:27969063 | 17  | 27.96906 | 0.0009828777 | Credible Set | purple |
| chr17:27978189 | 17  | 27.97819 | 0.0009987248 | Credible Set | purple |
| chr17:27978217 | 17  | 27.97822 | 0.0009987248 | Credible Set | purple |
| chr17:27978305 | 17  | 27.97830 | 0.0008644625 | Credible Set | purple |
| chr17:27982311 | 17  | 27.98231 | 0.0011086752 | Credible Set | purple |
| chr17:27982320 | 17  | 27.98232 | 0.0011252062 | Credible Set | purple |
| chr17:27986901 | 17  | 27.98690 | 0.0009202298 | Credible Set | purple |
| chr17:27996164 | 17  | 27.99616 | 0.0009316572 | Credible Set | purple |
| chr17:27996409 | 17  | 27.99641 | 0.0007122434 | Credible Set | purple |
| chr17:27996433 | 17  | 27.99643 | 0.0007061831 | Credible Set | purple |
| chr17:27998199 | 17  | 27.99820 | 0.0009372187 | Credible Set | purple |
| chr17:28005852 | 17  | 28.00585 | 0.0008597242 | Credible Set | purple |
| chr17:28006277 | 17  | 28.00628 | 0.0009220173 | Credible Set | purple |
| chr17:28009409 | 17  | 28.00941 | 0.0009203198 | Credible Set | purple |
| chr17:28013892 | 17  | 28.01389 | 0.0008496057 | Credible Set | purple |
| chr17:28016695 | 17  | 28.01669 | 0.0009987248 | Credible Set | purple |
| chr17:28016697 | 17  | 28.01670 | 0.0009987248 | Credible Set | purple |
| chr17:28016702 | 17  | 28.01670 | 0.0009987248 | Credible Set | purple |
| chr17:28016770 | 17  | 28.01677 | 0.0009653182 | Credible Set | purple |
| chr17:28023882 | 17  | 28.02388 | 0.0008816039 | Credible Set | purple |
| chr17:28024097 | 17  | 28.02410 | 0.0010087990 | Credible Set | purple |
| chr17:28026770 | 17  | 28.02677 | 0.0009805809 | Credible Set | purple |
| chr17:28036756 | 17  | 28.03676 | 0.0010088315 | Credible Set | purple |
| chr17:28037425 | 17  | 28.03742 | 0.0008502947 | Credible Set | purple |
| chr17:28046103 | 17  | 28.04610 | 0.0017489299 | Credible Set | purple |
| chr17:28046109 | 17  | 28.04611 | 0.0017300678 | Credible Set | purple |
| chr17:28046746 | 17  | 28.04675 | 0.0008583626 | Credible Set | purple |
| chr17:28046753 | 17  | 28.04675 | 0.0008987162 | Credible Set | purple |
| chr17:28050079 | 17  | 28.05008 | 0.0008890477 | Credible Set | purple |

Fine-mapping Regions

| snp            | chr | pos (Mb) | pp           | group        | color  |
|----------------|-----|----------|--------------|--------------|--------|
| chr17:28050266 | 17  | 28.05027 | 0.0007842086 | Credible Set | purple |
| chr17:28050607 | 17  | 28.05061 | 0.0017435338 | Credible Set | purple |
| chr17:28063789 | 17  | 28.06379 | 0.0007356959 | Credible Set | purple |
| chr17:28144309 | 17  | 28.14431 | 0.0010739984 | Credible Set | purple |
| chr17:28157995 | 17  | 28.15799 | 0.0014091523 | Credible Set | purple |
| chr17:28182743 | 17  | 28.18274 | 0.0031813313 | Credible Set | purple |
| chr17:28182775 | 17  | 28.18277 | 0.0031455848 | Credible Set | purple |
| chr17:28186934 | 17  | 28.18693 | 0.0007944738 | Credible Set | purple |
| chr17:28186976 | 17  | 28.18698 | 0.0007971036 | Credible Set | purple |

# F34 GBS, fear conditioning, freezing to context day 2

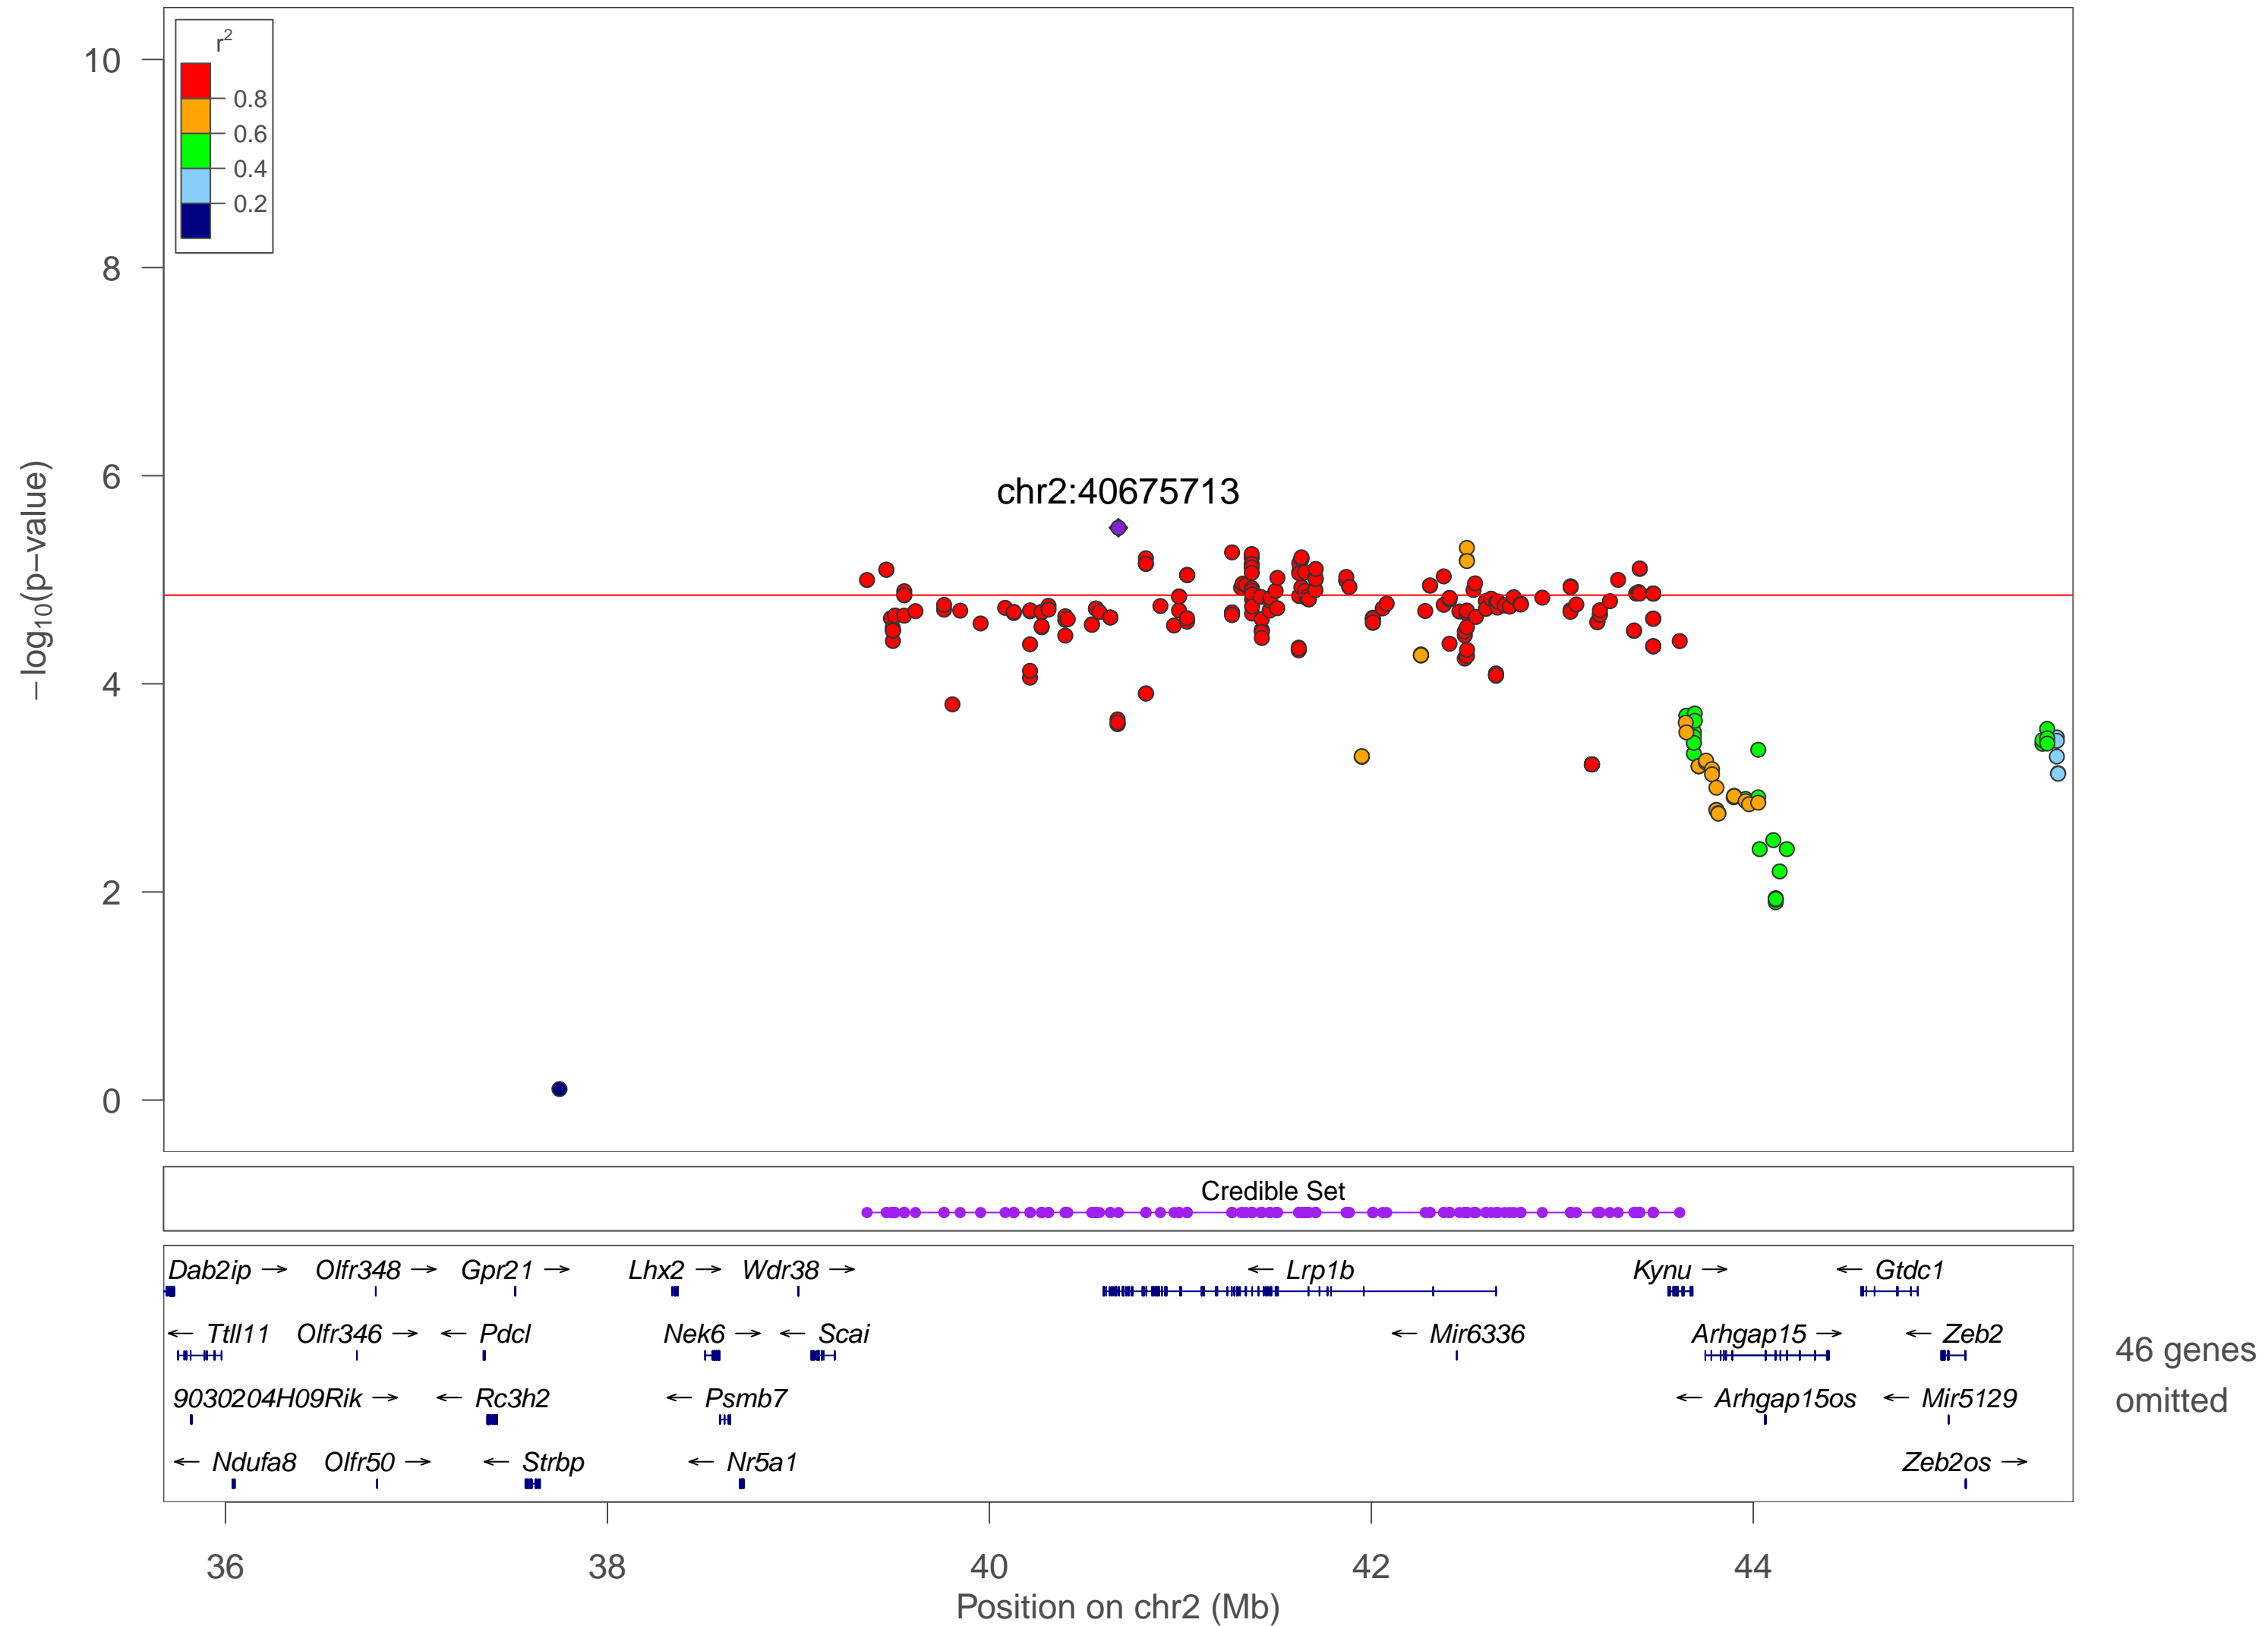

date: Thu Oct 25 17:14:07 2018  
build: F34GBS  
display range: chr2:35675713–45675713 [35675713–45675713]  
hilite range: 0 – 0 [ 0 – 0 ]  
reference SNP: chr2:40675713  
number of SNPs plotted: 274  
min P-value: 3.16E–6 [chr2:40675713]  
max P-value: 7.84E–1 [chr2:37748995]  
omitted Genes: Morn5, Lhx6, Rbm18  
omitted Genes: Mrrf, Ptgs1, Olfr338  
omitted Genes: Olfr339, Olfr340, Olfr341  
omitted Genes: Olfr342, Olfr344, Olfr345  
omitted Genes: Olfr347, Olfr3, Olfr350  
omitted Genes: Olfr351, Olfr352, Olfr353  
omitted Genes: Olfr354, Olfr355, Olfr356  
omitted Genes: Olfr357, Olfr358, Olfr360  
omitted Genes: Olfr361, Olfr362, Olfr365  
omitted Genes: Olfr366, Olfr367–ps, Olfr368  
omitted Genes: Snord90, Zbtb6, Zbtb26  
omitted Genes: Rabgap1, Mir5128, Crb2  
omitted Genes: Dennd1a, Nr6a1, Mir181a–2  
omitted Genes: Mir181b–2, Olfml2a, Rpl35  
omitted Genes: Arpc5l, Golga1, Gm16523  
omitted Genes: Ppp6c

## Fine-mapping Regions

| snp           | chr | pos (Mb) | pp          | group        | color  |
|---------------|-----|----------|-------------|--------------|--------|
| chr2:39359208 | 2   | 39.35921 | 0.007548244 | Credible Set | purple |
| chr2:39460505 | 2   | 39.46050 | 0.009372509 | Credible Set | purple |
| chr2:39460561 | 2   | 39.46056 | 0.009375488 | Credible Set | purple |
| chr2:39484371 | 2   | 39.48437 | 0.003359347 | Credible Set | purple |
| chr2:39493906 | 2   | 39.49391 | 0.002756126 | Credible Set | purple |
| chr2:39494797 | 2   | 39.49480 | 0.002087167 | Credible Set | purple |
| chr2:39494848 | 2   | 39.49485 | 0.002597478 | Credible Set | purple |
| chr2:39494860 | 2   | 39.49486 | 0.002591278 | Credible Set | purple |
| chr2:39494876 | 2   | 39.49488 | 0.002597478 | Credible Set | purple |
| chr2:39505733 | 2   | 39.50573 | 0.003555626 | Credible Set | purple |
| chr2:39505816 | 2   | 39.50582 | 0.003554107 | Credible Set | purple |
| chr2:39554087 | 2   | 39.55409 | 0.003557820 | Credible Set | purple |
| chr2:39554255 | 2   | 39.55425 | 0.005954087 | Credible Set | purple |
| chr2:39554302 | 2   | 39.55430 | 0.005469651 | Credible Set | purple |
| chr2:39554330 | 2   | 39.55433 | 0.005477828 | Credible Set | purple |
| chr2:39612884 | 2   | 39.61288 | 0.003911576 | Credible Set | purple |
| chr2:39762768 | 2   | 39.76277 | 0.004035344 | Credible Set | purple |
| chr2:39762904 | 2   | 39.76290 | 0.004457605 | Credible Set | purple |
| chr2:39847233 | 2   | 39.84723 | 0.003951008 | Credible Set | purple |
| chr2:39954028 | 2   | 39.95403 | 0.003014100 | Credible Set | purple |
| chr2:40082594 | 2   | 40.08259 | 0.004188936 | Credible Set | purple |
| chr2:40127679 | 2   | 40.12768 | 0.003760456 | Credible Set | purple |
| chr2:40127769 | 2   | 40.12777 | 0.003834860 | Credible Set | purple |
| chr2:40127812 | 2   | 40.12781 | 0.003834860 | Credible Set | purple |
| chr2:40212829 | 2   | 40.21283 | 0.001945604 | Credible Set | purple |
| chr2:40213202 | 2   | 40.21320 | 0.003902104 | Credible Set | purple |
| chr2:40213736 | 2   | 40.21374 | 0.003976946 | Credible Set | purple |
| chr2:40273583 | 2   | 40.27358 | 0.003834860 | Credible Set | purple |
| chr2:40273640 | 2   | 40.27364 | 0.003834860 | Credible Set | purple |
| chr2:40273652 | 2   | 40.27365 | 0.003834860 | Credible Set | purple |
| chr2:40273690 | 2   | 40.27369 | 0.002784294 | Credible Set | purple |
| chr2:40273730 | 2   | 40.27373 | 0.002846471 | Credible Set | purple |
| chr2:40309721 | 2   | 40.30972 | 0.004378585 | Credible Set | purple |
| chr2:40309754 | 2   | 40.30975 | 0.004040999 | Credible Set | purple |
| chr2:40397532 | 2   | 40.39753 | 0.002335952 | Credible Set | purple |
| chr2:40397564 | 2   | 40.39756 | 0.003250080 | Credible Set | purple |

## Fine-mapping Regions

| snp           | chr | pos (Mb) | pp          | group        | color  |
|---------------|-----|----------|-------------|--------------|--------|
| chr2:40397616 | 2   | 40.39762 | 0.003511113 | Credible Set | purple |
| chr2:40410289 | 2   | 40.41029 | 0.003298775 | Credible Set | purple |
| chr2:40536999 | 2   | 40.53700 | 0.002959671 | Credible Set | purple |
| chr2:40537001 | 2   | 40.53700 | 0.002927420 | Credible Set | purple |
| chr2:40558241 | 2   | 40.55824 | 0.004128112 | Credible Set | purple |
| chr2:40558249 | 2   | 40.55825 | 0.004128112 | Credible Set | purple |
| chr2:40558252 | 2   | 40.55825 | 0.004126635 | Credible Set | purple |
| chr2:40576355 | 2   | 40.57635 | 0.003828971 | Credible Set | purple |
| chr2:40633282 | 2   | 40.63328 | 0.003418566 | Credible Set | purple |
| chr2:40633327 | 2   | 40.63333 | 0.003427448 | Credible Set | purple |
| chr2:40675713 | 2   | 40.67571 | 0.022796704 | Credible Set | purple |
| chr2:40819654 | 2   | 40.81965 | 0.011948699 | Credible Set | purple |
| chr2:40819655 | 2   | 40.81965 | 0.010590288 | Credible Set | purple |
| chr2:40819681 | 2   | 40.81968 | 0.010670779 | Credible Set | purple |
| chr2:40895540 | 2   | 40.89554 | 0.004354632 | Credible Set | purple |
| chr2:40966785 | 2   | 40.96679 | 0.002890867 | Credible Set | purple |
| chr2:40993125 | 2   | 40.99312 | 0.003964297 | Credible Set | purple |
| chr2:40993261 | 2   | 40.99326 | 0.005339714 | Credible Set | purple |
| chr2:40993264 | 2   | 40.99326 | 0.005300705 | Credible Set | purple |
| chr2:41034946 | 2   | 41.03495 | 0.003133902 | Credible Set | purple |
| chr2:41034956 | 2   | 41.03496 | 0.003370645 | Credible Set | purple |
| chr2:41035611 | 2   | 41.03561 | 0.008381406 | Credible Set | purple |
| chr2:41035612 | 2   | 41.03561 | 0.008381406 | Credible Set | purple |
| chr2:41035617 | 2   | 41.03562 | 0.008381406 | Credible Set | purple |
| chr2:41270329 | 2   | 41.27033 | 0.003800026 | Credible Set | purple |
| chr2:41270331 | 2   | 41.27033 | 0.003799849 | Credible Set | purple |
| chr2:41270370 | 2   | 41.27037 | 0.003596583 | Credible Set | purple |
| chr2:41270733 | 2   | 41.27073 | 0.013531669 | Credible Set | purple |
| chr2:41318161 | 2   | 41.31816 | 0.006420104 | Credible Set | purple |
| chr2:41325733 | 2   | 41.32573 | 0.006979490 | Credible Set | purple |
| chr2:41344260 | 2   | 41.34426 | 0.006809245 | Credible Set | purple |
| chr2:41373379 | 2   | 41.37338 | 0.012061739 | Credible Set | purple |
| chr2:41373395 | 2   | 41.37340 | 0.013062810 | Credible Set | purple |
| chr2:41373397 | 2   | 41.37340 | 0.010593303 | Credible Set | purple |
| chr2:41373418 | 2   | 41.37342 | 0.009852093 | Credible Set | purple |
| chr2:41373858 | 2   | 41.37386 | 0.008776557 | Credible Set | purple |



## Fine-mapping Regions

| snp           | chr | pos (Mb) | pp          | group        | color  |
|---------------|-----|----------|-------------|--------------|--------|
| chr2:41374907 | 2   | 41.37491 | 0.006334603 | Credible Set | purple |
| chr2:41374921 | 2   | 41.37492 | 0.006011556 | Credible Set | purple |
| chr2:41375382 | 2   | 41.37538 | 0.005007241 | Credible Set | purple |
| chr2:41375442 | 2   | 41.37544 | 0.005575538 | Credible Set | purple |
| chr2:41375546 | 2   | 41.37555 | 0.003718006 | Credible Set | purple |
| chr2:41375551 | 2   | 41.37555 | 0.004310690 | Credible Set | purple |
| chr2:41420007 | 2   | 41.42001 | 0.005285896 | Credible Set | purple |
| chr2:41426404 | 2   | 41.42640 | 0.002615679 | Credible Set | purple |
| chr2:41426414 | 2   | 41.42641 | 0.002614234 | Credible Set | purple |
| chr2:41426429 | 2   | 41.42643 | 0.003302609 | Credible Set | purple |
| chr2:41426432 | 2   | 41.42643 | 0.002520385 | Credible Set | purple |
| chr2:41426436 | 2   | 41.42644 | 0.002221909 | Credible Set | purple |
| chr2:41467642 | 2   | 41.46764 | 0.003955334 | Credible Set | purple |
| chr2:41468064 | 2   | 41.46806 | 0.004911632 | Credible Set | purple |
| chr2:41471314 | 2   | 41.47131 | 0.005155447 | Credible Set | purple |
| chr2:41498784 | 2   | 41.49878 | 0.005987205 | Credible Set | purple |
| chr2:41507457 | 2   | 41.50746 | 0.004159746 | Credible Set | purple |
| chr2:41508402 | 2   | 41.50840 | 0.007893868 | Credible Set | purple |
| chr2:41619931 | 2   | 41.61993 | 0.001714713 | Credible Set | purple |
| chr2:41619935 | 2   | 41.61993 | 0.001814831 | Credible Set | purple |
| chr2:41620001 | 2   | 41.62000 | 0.001783550 | Credible Set | purple |
| chr2:41622012 | 2   | 41.62201 | 0.005378711 | Credible Set | purple |
| chr2:41622721 | 2   | 41.62272 | 0.008975935 | Credible Set | purple |
| chr2:41622751 | 2   | 41.62275 | 0.010758238 | Credible Set | purple |
| chr2:41622763 | 2   | 41.62276 | 0.008683312 | Credible Set | purple |
| chr2:41633469 | 2   | 41.63347 | 0.006472353 | Credible Set | purple |
| chr2:41633904 | 2   | 41.63390 | 0.012039397 | Credible Set | purple |
| chr2:41633967 | 2   | 41.63397 | 0.011723121 | Credible Set | purple |
| chr2:41633971 | 2   | 41.63397 | 0.012185559 | Credible Set | purple |
| chr2:41652829 | 2   | 41.65283 | 0.006009589 | Credible Set | purple |
| chr2:41653372 | 2   | 41.65337 | 0.008902364 | Credible Set | purple |
| chr2:41661623 | 2   | 41.66162 | 0.005124683 | Credible Set | purple |
| chr2:41666380 | 2   | 41.66638 | 0.005305685 | Credible Set | purple |
| chr2:41672293 | 2   | 41.67229 | 0.005022459 | Credible Set | purple |
| chr2:41672310 | 2   | 41.67231 | 0.005022459 | Credible Set | purple |
| chr2:41672317 | 2   | 41.67232 | 0.005022459 | Credible Set | purple |

## Fine-mapping Regions

| snp           | chr | pos (Mb) | pp          | group        | color  |
|---------------|-----|----------|-------------|--------------|--------|
| chr2:41706826 | 2   | 41.70683 | 0.006108973 | Credible Set | purple |
| chr2:41706866 | 2   | 41.70687 | 0.006094456 | Credible Set | purple |
| chr2:41707052 | 2   | 41.70705 | 0.007974998 | Credible Set | purple |
| chr2:41708898 | 2   | 41.70890 | 0.007697465 | Credible Set | purple |
| chr2:41708916 | 2   | 41.70892 | 0.007697465 | Credible Set | purple |
| chr2:41709000 | 2   | 41.70900 | 0.009530093 | Credible Set | purple |
| chr2:41868150 | 2   | 41.86815 | 0.007425278 | Credible Set | purple |
| chr2:41868765 | 2   | 41.86877 | 0.008051082 | Credible Set | purple |
| chr2:41884228 | 2   | 41.88423 | 0.006524157 | Credible Set | purple |
| chr2:41884645 | 2   | 41.88464 | 0.006507704 | Credible Set | purple |
| chr2:42008023 | 2   | 42.00802 | 0.003406870 | Credible Set | purple |
| chr2:42008027 | 2   | 42.00803 | 0.003288098 | Credible Set | purple |
| chr2:42008064 | 2   | 42.00806 | 0.003342753 | Credible Set | purple |
| chr2:42008225 | 2   | 42.00823 | 0.003054640 | Credible Set | purple |
| chr2:42008231 | 2   | 42.00823 | 0.003083756 | Credible Set | purple |
| chr2:42059626 | 2   | 42.05963 | 0.004146350 | Credible Set | purple |
| chr2:42080261 | 2   | 42.08026 | 0.004579822 | Credible Set | purple |
| chr2:42282211 | 2   | 42.28221 | 0.003923834 | Credible Set | purple |
| chr2:42307494 | 2   | 42.30749 | 0.006697496 | Credible Set | purple |
| chr2:42307501 | 2   | 42.30750 | 0.006733021 | Credible Set | purple |
| chr2:42379072 | 2   | 42.37907 | 0.008141966 | Credible Set | purple |
| chr2:42379092 | 2   | 42.37909 | 0.004466849 | Credible Set | purple |
| chr2:42409383 | 2   | 42.40938 | 0.001969462 | Credible Set | purple |
| chr2:42409544 | 2   | 42.40954 | 0.004994454 | Credible Set | purple |
| chr2:42409580 | 2   | 42.40958 | 0.005162732 | Credible Set | purple |
| chr2:42409609 | 2   | 42.40961 | 0.005165707 | Credible Set | purple |
| chr2:42461317 | 2   | 42.46132 | 0.003880943 | Credible Set | purple |
| chr2:42489186 | 2   | 42.48919 | 0.001444107 | Credible Set | purple |
| chr2:42489404 | 2   | 42.48940 | 0.002345778 | Credible Set | purple |
| chr2:42489412 | 2   | 42.48941 | 0.002554452 | Credible Set | purple |
| chr2:42500142 | 2   | 42.50014 | 0.003736525 | Credible Set | purple |
| chr2:42500166 | 2   | 42.50017 | 0.003950726 | Credible Set | purple |
| chr2:42500195 | 2   | 42.50019 | 0.003939746 | Credible Set | purple |
| chr2:42500470 | 2   | 42.50047 | 0.002793201 | Credible Set | purple |
| chr2:42500907 | 2   | 42.50091 | 0.001526252 | Credible Set | purple |
| chr2:42500955 | 2   | 42.50095 | 0.001733242 | Credible Set | purple |

## Fine-mapping Regions

| snp           | chr | pos (Mb) | pp          | group        | color  |
|---------------|-----|----------|-------------|--------------|--------|
| chr2:42535122 | 2   | 42.53512 | 0.006117644 | Credible Set | purple |
| chr2:42543271 | 2   | 42.54327 | 0.007025324 | Credible Set | purple |
| chr2:42547701 | 2   | 42.54770 | 0.003463079 | Credible Set | purple |
| chr2:42599483 | 2   | 42.59948 | 0.004837144 | Credible Set | purple |
| chr2:42599828 | 2   | 42.59983 | 0.004104847 | Credible Set | purple |
| chr2:42627072 | 2   | 42.62707 | 0.005084259 | Credible Set | purple |
| chr2:42652766 | 2   | 42.65277 | 0.004721332 | Credible Set | purple |
| chr2:42661197 | 2   | 42.66120 | 0.004217076 | Credible Set | purple |
| chr2:42661577 | 2   | 42.66158 | 0.004799634 | Credible Set | purple |
| chr2:42698140 | 2   | 42.69814 | 0.004414216 | Credible Set | purple |
| chr2:42724203 | 2   | 42.72420 | 0.004300084 | Credible Set | purple |
| chr2:42745376 | 2   | 42.74538 | 0.005243831 | Credible Set | purple |
| chr2:42781323 | 2   | 42.78132 | 0.004516269 | Credible Set | purple |
| chr2:42783202 | 2   | 42.78320 | 0.004580945 | Credible Set | purple |
| chr2:42783471 | 2   | 42.78347 | 0.004501612 | Credible Set | purple |
| chr2:42895360 | 2   | 42.89536 | 0.005193245 | Credible Set | purple |
| chr2:43043152 | 2   | 43.04315 | 0.003998648 | Credible Set | purple |
| chr2:43043214 | 2   | 43.04321 | 0.003852870 | Credible Set | purple |
| chr2:43043633 | 2   | 43.04363 | 0.006509506 | Credible Set | purple |
| chr2:43043675 | 2   | 43.04368 | 0.006607507 | Credible Set | purple |
| chr2:43043682 | 2   | 43.04368 | 0.006499695 | Credible Set | purple |
| chr2:43073408 | 2   | 43.07341 | 0.004494607 | Credible Set | purple |
| chr2:43183452 | 2   | 43.18345 | 0.003104119 | Credible Set | purple |
| chr2:43183517 | 2   | 43.18352 | 0.003102081 | Credible Set | purple |
| chr2:43196679 | 2   | 43.19668 | 0.003643281 | Credible Set | purple |
| chr2:43196709 | 2   | 43.19671 | 0.003624458 | Credible Set | purple |
| chr2:43196873 | 2   | 43.19687 | 0.003986405 | Credible Set | purple |
| chr2:43249424 | 2   | 43.24942 | 0.004822599 | Credible Set | purple |
| chr2:43292233 | 2   | 43.29223 | 0.007569541 | Credible Set | purple |
| chr2:43375733 | 2   | 43.37573 | 0.002581464 | Credible Set | purple |
| chr2:43375782 | 2   | 43.37578 | 0.002605897 | Credible Set | purple |
| chr2:43386699 | 2   | 43.38670 | 0.005667022 | Credible Set | purple |
| chr2:43399155 | 2   | 43.39916 | 0.005849502 | Credible Set | purple |
| chr2:43405381 | 2   | 43.40538 | 0.005670873 | Credible Set | purple |
| chr2:43405453 | 2   | 43.40545 | 0.009534120 | Credible Set | purple |
| chr2:43405489 | 2   | 43.40549 | 0.009630139 | Credible Set | purple |

Fine-mapping Regions

| snp           | chr | pos (Mb) | pp          | group        | color  |
|---------------|-----|----------|-------------|--------------|--------|
| chr2:43476031 | 2   | 43.47603 | 0.003346023 | Credible Set | purple |
| chr2:43476032 | 2   | 43.47603 | 0.003329906 | Credible Set | purple |
| chr2:43476033 | 2   | 43.47603 | 0.003329906 | Credible Set | purple |
| chr2:43476096 | 2   | 43.47610 | 0.005667022 | Credible Set | purple |
| chr2:43476171 | 2   | 43.47617 | 0.001867513 | Credible Set | purple |
| chr2:43476172 | 2   | 43.47617 | 0.001867513 | Credible Set | purple |
| chr2:43476173 | 2   | 43.47617 | 0.001867513 | Credible Set | purple |
| chr2:43476189 | 2   | 43.47619 | 0.001867513 | Credible Set | purple |
| chr2:43476235 | 2   | 43.47624 | 0.005667022 | Credible Set | purple |
| chr2:43476254 | 2   | 43.47625 | 0.005667022 | Credible Set | purple |
| chr2:43476258 | 2   | 43.47626 | 0.005667022 | Credible Set | purple |
| chr2:43614807 | 2   | 43.61481 | 0.002081936 | Credible Set | purple |

F34 GBS, heart weight (mg)

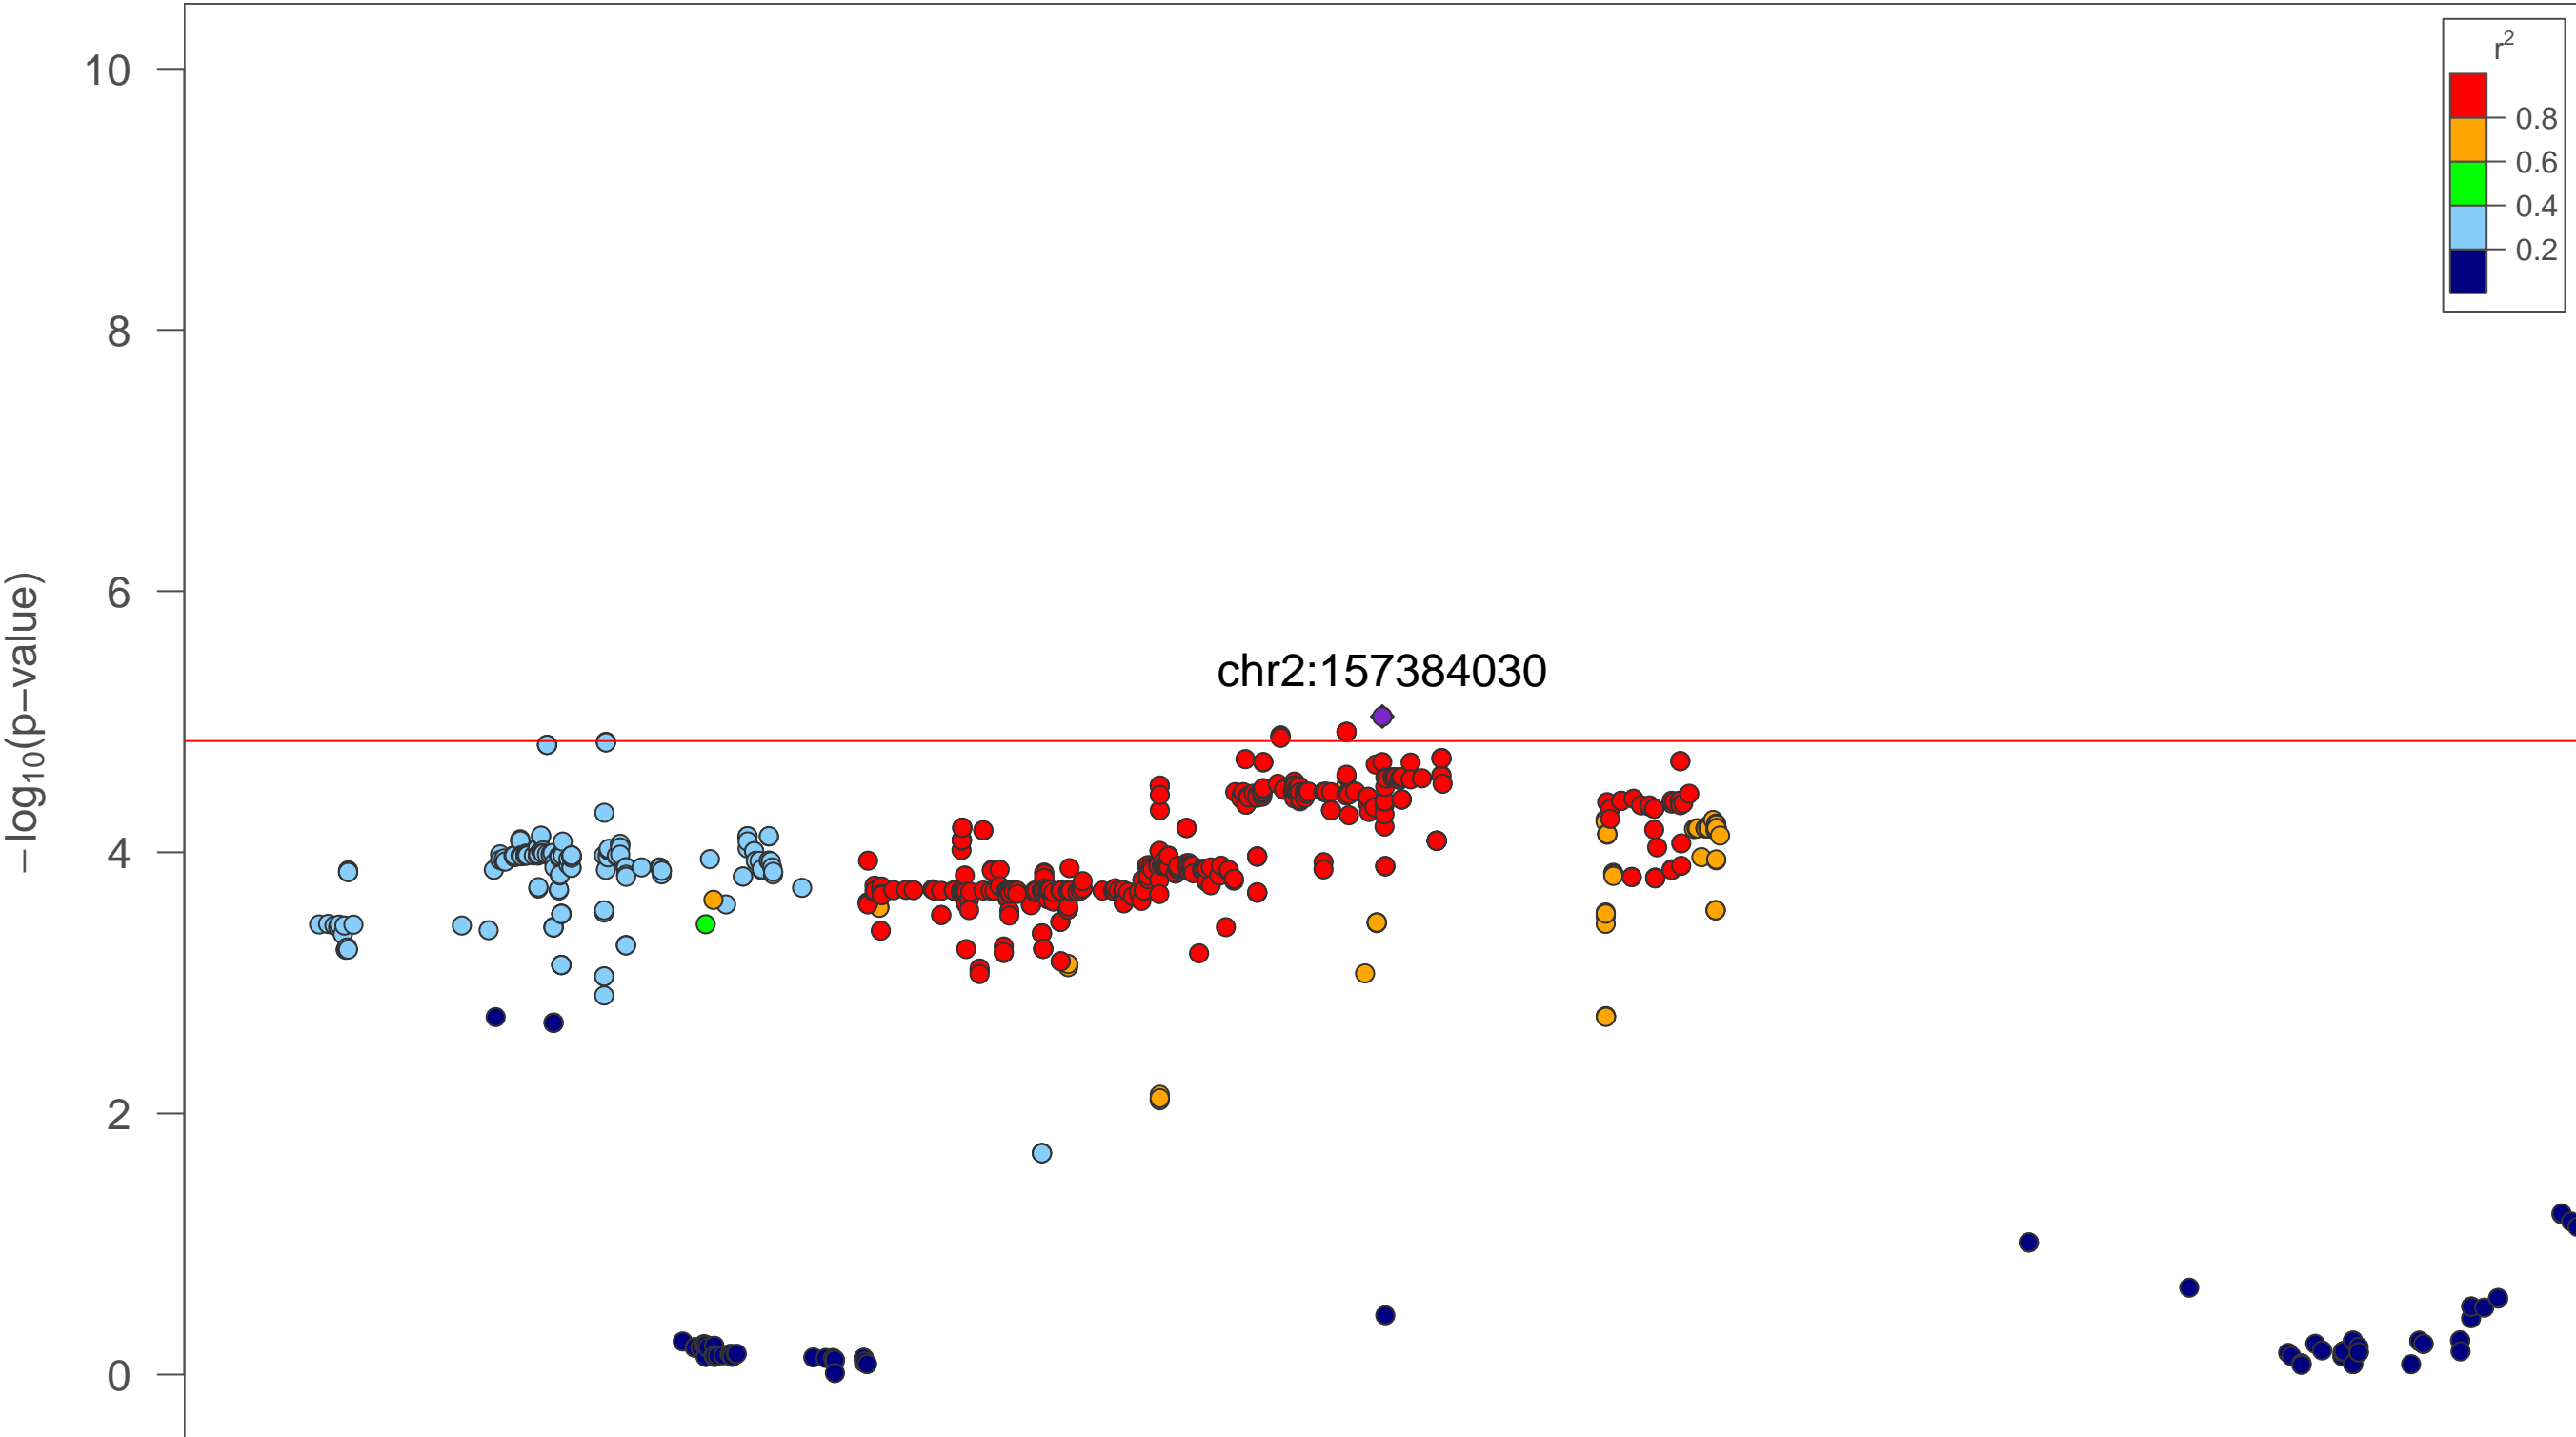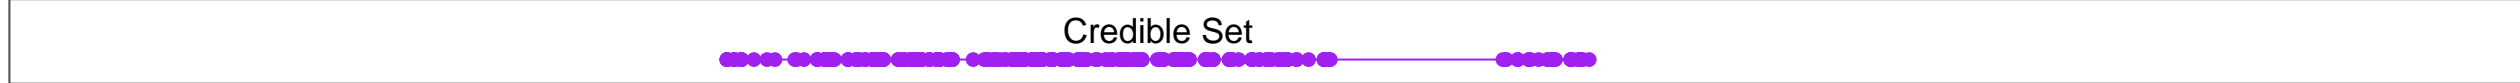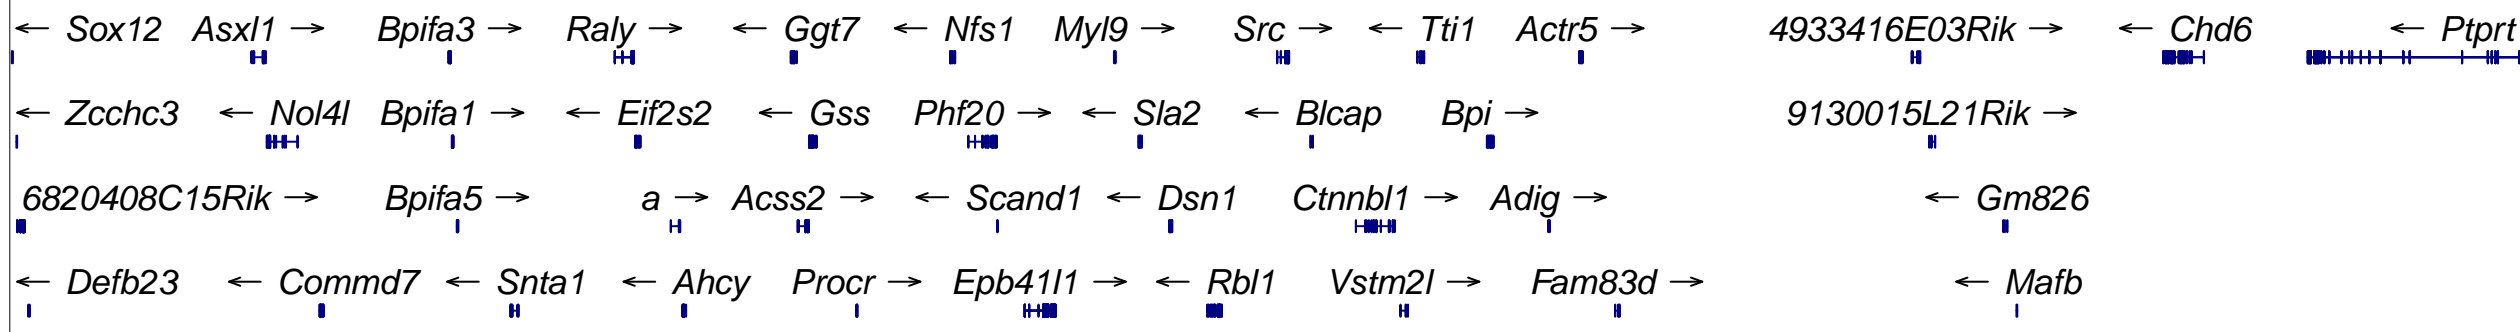

122 genes  
omitted

date: Thu Oct 25 17:14:22 2018

build: F34GBS

display range: chr2:152384030–162384030 [152384030–162384030]

hilite range: 0 – 0 [ 0 – 0 ]

reference SNP: chr2:157384030

number of SNPs plotted: 729

min P-value: 9.12E–6 [chr2:157384030]

max P-value: 9.73E–1 [chr2:155099522]

omitted Genes: Defb20, Defb22, Defb26

omitted Genes: Defb28, Defb29, Defb21

omitted Genes: Defb19, Defb45, Defb36

omitted Genes: Defb25, Rem1, H13

omitted Genes: Mcts2, Id1, Cox4i2

omitted Genes: Bcl2l1, Tpx2, Mir5622

omitted Genes: Mylk2, Foxs1, Dusp15

omitted Genes: Tll9, Pdrg1, Xkr7

omitted Genes: Ccm2l, Hck, Tm9sf4

omitted Genes: Tspyl3, Plagl2, Pofut1

omitted Genes: Kif3b, 2500004C02Rik, Dnmt3b

omitted Genes: Mapre1, Efcab8, Sun5

omitted Genes: Bpifb2, Bpifb6, Bpifb3

omitted Genes: Bpifb4, Bpifa6, Bpifa2

omitted Genes: Bpifb1, Bpifb5, Bpifb9a

omitted Genes: Bpifb9b, Cdk5rap1, Cbfa2t2

omitted Genes: Necab3, 1700003F12Rik, Actl10

omitted Genes: E2f1, Pxmp4, Zfp341

omitted Genes: Chmp4b, 2310005A03Rik, Itch

omitted Genes: Dynlrb1, Map1lc3a, Pigu

omitted Genes: Mir695, Trp53inp2, Ncoa6

omitted Genes: Acss2os, Myh7b, Mir499

omitted Genes: Trpc4ap, Edem2, Mmp24

omitted Genes: BC029722, Eif6, Fam83c

omitted Genes: Uqcc1, Gdf5, Cep250

omitted Genes: 6430550D23Rik, Ergic3, Fer1l4

omitted Genes: Spag4, Cpne1, Rbm12

omitted Genes: Romo1, Rbm39, Cnbd2

omitted Genes: 2900097C17Rik, Aar2, Gm14169

omitted Genes: Dlgap4, 4930405A21Rik, Tgif2

omitted Genes: 5430405H02Rik, 1110008F13Rik, Ndrp3

omitted Genes: Soga1, Tldc2, Samhd1

Make more plots at <http://csg.sph.umich.edu/locuszoom/>

## Fine-mapping Regions

| snp            | chr | pos (Mb) | pp           | group        | color  |
|----------------|-----|----------|--------------|--------------|--------|
| chr2:155236637 | 2   | 155.2366 | 0.0007199393 | Credible Set | purple |
| chr2:155236657 | 2   | 155.2367 | 0.0007136158 | Credible Set | purple |
| chr2:155236987 | 2   | 155.2370 | 0.0006939292 | Credible Set | purple |
| chr2:155237968 | 2   | 155.2380 | 0.0014328956 | Credible Set | purple |
| chr2:155264835 | 2   | 155.2648 | 0.0009474776 | Credible Set | purple |
| chr2:155265639 | 2   | 155.2656 | 0.0008729028 | Credible Set | purple |
| chr2:155266429 | 2   | 155.2664 | 0.0008427265 | Credible Set | purple |
| chr2:155266459 | 2   | 155.2665 | 0.0008720977 | Credible Set | purple |
| chr2:155291486 | 2   | 155.2915 | 0.0008908124 | Credible Set | purple |
| chr2:155294582 | 2   | 155.2946 | 0.0009336505 | Credible Set | purple |
| chr2:155294781 | 2   | 155.2948 | 0.0008242966 | Credible Set | purple |
| chr2:155294817 | 2   | 155.2948 | 0.0008071419 | Credible Set | purple |
| chr2:155344176 | 2   | 155.3442 | 0.0008784186 | Credible Set | purple |
| chr2:155396284 | 2   | 155.3963 | 0.0008830479 | Credible Set | purple |
| chr2:155427716 | 2   | 155.4277 | 0.0008786755 | Credible Set | purple |
| chr2:155506374 | 2   | 155.5064 | 0.0008902493 | Credible Set | purple |
| chr2:155514315 | 2   | 155.5143 | 0.0008729584 | Credible Set | purple |
| chr2:155542937 | 2   | 155.5429 | 0.0008682669 | Credible Set | purple |
| chr2:155596243 | 2   | 155.5962 | 0.0008729375 | Credible Set | purple |
| chr2:155596245 | 2   | 155.5962 | 0.0008729375 | Credible Set | purple |
| chr2:155596254 | 2   | 155.5963 | 0.0008729375 | Credible Set | purple |
| chr2:155626668 | 2   | 155.6267 | 0.0008729584 | Credible Set | purple |
| chr2:155626706 | 2   | 155.6267 | 0.0008729584 | Credible Set | purple |
| chr2:155626733 | 2   | 155.6267 | 0.0008284808 | Credible Set | purple |
| chr2:155626741 | 2   | 155.6267 | 0.0008240148 | Credible Set | purple |
| chr2:155627928 | 2   | 155.6279 | 0.0017096500 | Credible Set | purple |
| chr2:155629232 | 2   | 155.6292 | 0.0020257733 | Credible Set | purple |
| chr2:155629273 | 2   | 155.6293 | 0.0020068561 | Credible Set | purple |
| chr2:155629287 | 2   | 155.6293 | 0.0020151674 | Credible Set | purple |
| chr2:155629299 | 2   | 155.6293 | 0.0020162105 | Credible Set | purple |
| chr2:155630405 | 2   | 155.6304 | 0.0008729584 | Credible Set | purple |
| chr2:155630630 | 2   | 155.6306 | 0.0008729584 | Credible Set | purple |
| chr2:155630746 | 2   | 155.6307 | 0.0008729584 | Credible Set | purple |
| chr2:155631110 | 2   | 155.6311 | 0.0008612540 | Credible Set | purple |
| chr2:155631278 | 2   | 155.6313 | 0.0024809687 | Credible Set | purple |
| chr2:155631284 | 2   | 155.6313 | 0.0024809687 | Credible Set | purple |

## Fine-mapping Regions

| snp            | chr | pos (Mb) | pp           | group        | color  |
|----------------|-----|----------|--------------|--------------|--------|
| chr2:155631311 | 2   | 155.6313 | 0.0024809687 | Credible Set | purple |
| chr2:155632202 | 2   | 155.6322 | 0.0008729584 | Credible Set | purple |
| chr2:155632358 | 2   | 155.6324 | 0.0008969433 | Credible Set | purple |
| chr2:155632880 | 2   | 155.6329 | 0.0008530782 | Credible Set | purple |
| chr2:155633328 | 2   | 155.6333 | 0.0008750734 | Credible Set | purple |
| chr2:155640583 | 2   | 155.6406 | 0.0008721286 | Credible Set | purple |
| chr2:155640694 | 2   | 155.6407 | 0.0008825599 | Credible Set | purple |
| chr2:155640700 | 2   | 155.6407 | 0.0008825599 | Credible Set | purple |
| chr2:155641730 | 2   | 155.6417 | 0.0011207552 | Credible Set | purple |
| chr2:155647032 | 2   | 155.6470 | 0.0006982295 | Credible Set | purple |
| chr2:155647066 | 2   | 155.6471 | 0.0008546250 | Credible Set | purple |
| chr2:155659679 | 2   | 155.6597 | 0.0007542431 | Credible Set | purple |
| chr2:155664276 | 2   | 155.6643 | 0.0008553533 | Credible Set | purple |
| chr2:155718717 | 2   | 155.7187 | 0.0008729584 | Credible Set | purple |
| chr2:155718886 | 2   | 155.7189 | 0.0023705272 | Credible Set | purple |
| chr2:155718943 | 2   | 155.7189 | 0.0023801897 | Credible Set | purple |
| chr2:155748773 | 2   | 155.7488 | 0.0008729584 | Credible Set | purple |
| chr2:155754530 | 2   | 155.7545 | 0.0012327921 | Credible Set | purple |
| chr2:155754728 | 2   | 155.7547 | 0.0012082383 | Credible Set | purple |
| chr2:155765708 | 2   | 155.7657 | 0.0008729584 | Credible Set | purple |
| chr2:155787135 | 2   | 155.7871 | 0.0012369428 | Credible Set | purple |
| chr2:155787323 | 2   | 155.7873 | 0.0009387213 | Credible Set | purple |
| chr2:155813877 | 2   | 155.8139 | 0.0008614602 | Credible Set | purple |
| chr2:155816627 | 2   | 155.8166 | 0.0008729584 | Credible Set | purple |
| chr2:155818442 | 2   | 155.8184 | 0.0008729584 | Credible Set | purple |
| chr2:155819513 | 2   | 155.8195 | 0.0008729584 | Credible Set | purple |
| chr2:155819633 | 2   | 155.8196 | 0.0007644669 | Credible Set | purple |
| chr2:155819676 | 2   | 155.8197 | 0.0007721204 | Credible Set | purple |
| chr2:155828085 | 2   | 155.8281 | 0.0008668923 | Credible Set | purple |
| chr2:155828345 | 2   | 155.8283 | 0.0008751667 | Credible Set | purple |
| chr2:155828819 | 2   | 155.8288 | 0.0008233466 | Credible Set | purple |
| chr2:155830487 | 2   | 155.8305 | 0.0008729584 | Credible Set | purple |
| chr2:155830972 | 2   | 155.8310 | 0.0008404790 | Credible Set | purple |
| chr2:155843797 | 2   | 155.8438 | 0.0008729584 | Credible Set | purple |
| chr2:155843802 | 2   | 155.8438 | 0.0008729584 | Credible Set | purple |
| chr2:155845413 | 2   | 155.8454 | 0.0008658399 | Credible Set | purple |



## Fine-mapping Regions

| snp            | chr | pos (Mb) | pp           | group        | color  |
|----------------|-----|----------|--------------|--------------|--------|
| chr2:155859749 | 2   | 155.8597 | 0.0008729584 | Credible Set | purple |
| chr2:155860022 | 2   | 155.8600 | 0.0008248830 | Credible Set | purple |
| chr2:155917786 | 2   | 155.9178 | 0.0006886365 | Credible Set | purple |
| chr2:155917800 | 2   | 155.9178 | 0.0006855513 | Credible Set | purple |
| chr2:155934881 | 2   | 155.9349 | 0.0008749813 | Credible Set | purple |
| chr2:155935242 | 2   | 155.9352 | 0.0008471720 | Credible Set | purple |
| chr2:155941490 | 2   | 155.9415 | 0.0008729584 | Credible Set | purple |
| chr2:155941536 | 2   | 155.9415 | 0.0008729584 | Credible Set | purple |
| chr2:155962070 | 2   | 155.9621 | 0.0008729584 | Credible Set | purple |
| chr2:155968871 | 2   | 155.9689 | 0.0008455660 | Credible Set | purple |
| chr2:155968907 | 2   | 155.9689 | 0.0008455660 | Credible Set | purple |
| chr2:155969145 | 2   | 155.9691 | 0.0009201868 | Credible Set | purple |
| chr2:155969338 | 2   | 155.9693 | 0.0008729584 | Credible Set | purple |
| chr2:155973018 | 2   | 155.9730 | 0.0011764984 | Credible Set | purple |
| chr2:155973035 | 2   | 155.9730 | 0.0011544100 | Credible Set | purple |
| chr2:155973441 | 2   | 155.9734 | 0.0010746205 | Credible Set | purple |
| chr2:155973467 | 2   | 155.9735 | 0.0010746205 | Credible Set | purple |
| chr2:155973697 | 2   | 155.9737 | 0.0008706290 | Credible Set | purple |
| chr2:155974320 | 2   | 155.9743 | 0.0009072750 | Credible Set | purple |
| chr2:155974339 | 2   | 155.9743 | 0.0008180992 | Credible Set | purple |
| chr2:155974623 | 2   | 155.9746 | 0.0008729584 | Credible Set | purple |
| chr2:155985744 | 2   | 155.9857 | 0.0008525414 | Credible Set | purple |
| chr2:155986052 | 2   | 155.9861 | 0.0008729584 | Credible Set | purple |
| chr2:155988485 | 2   | 155.9885 | 0.0008757936 | Credible Set | purple |
| chr2:155989053 | 2   | 155.9891 | 0.0007539538 | Credible Set | purple |
| chr2:155991302 | 2   | 155.9913 | 0.0008729584 | Credible Set | purple |
| chr2:155991810 | 2   | 155.9918 | 0.0008729584 | Credible Set | purple |
| chr2:155992021 | 2   | 155.9920 | 0.0008729584 | Credible Set | purple |
| chr2:155997923 | 2   | 155.9979 | 0.0008554985 | Credible Set | purple |
| chr2:155998479 | 2   | 155.9985 | 0.0008859869 | Credible Set | purple |
| chr2:156011028 | 2   | 156.0110 | 0.0007276252 | Credible Set | purple |
| chr2:156011085 | 2   | 156.0111 | 0.0007311140 | Credible Set | purple |
| chr2:156011672 | 2   | 156.0117 | 0.0008479509 | Credible Set | purple |
| chr2:156039455 | 2   | 156.0395 | 0.0008729584 | Credible Set | purple |
| chr2:156041520 | 2   | 156.0415 | 0.0008752613 | Credible Set | purple |
| chr2:156043677 | 2   | 156.0437 | 0.0008729584 | Credible Set | purple |

## Fine-mapping Regions

| snp            | chr | pos (Mb) | pp           | group        | color  |
|----------------|-----|----------|--------------|--------------|--------|
| chr2:156071586 | 2   | 156.0716 | 0.0008715943 | Credible Set | purple |
| chr2:156071629 | 2   | 156.0716 | 0.0006392670 | Credible Set | purple |
| chr2:156071635 | 2   | 156.0716 | 0.0006391099 | Credible Set | purple |
| chr2:156071639 | 2   | 156.0716 | 0.0006392670 | Credible Set | purple |
| chr2:156071668 | 2   | 156.0717 | 0.0006361231 | Credible Set | purple |
| chr2:156073463 | 2   | 156.0735 | 0.0006715235 | Credible Set | purple |
| chr2:156077894 | 2   | 156.0779 | 0.0008686683 | Credible Set | purple |
| chr2:156078317 | 2   | 156.0783 | 0.0008841489 | Credible Set | purple |
| chr2:156078406 | 2   | 156.0784 | 0.0008729375 | Credible Set | purple |
| chr2:156078707 | 2   | 156.0787 | 0.0008729375 | Credible Set | purple |
| chr2:156078913 | 2   | 156.0789 | 0.0012663797 | Credible Set | purple |
| chr2:156082428 | 2   | 156.0824 | 0.0008729375 | Credible Set | purple |
| chr2:156082588 | 2   | 156.0826 | 0.0008729375 | Credible Set | purple |
| chr2:156082682 | 2   | 156.0827 | 0.0008729375 | Credible Set | purple |
| chr2:156111908 | 2   | 156.1119 | 0.0008606281 | Credible Set | purple |
| chr2:156111910 | 2   | 156.1119 | 0.0008547668 | Credible Set | purple |
| chr2:156124158 | 2   | 156.1242 | 0.0008773532 | Credible Set | purple |
| chr2:156124843 | 2   | 156.1248 | 0.0008729584 | Credible Set | purple |
| chr2:156133370 | 2   | 156.1334 | 0.0008986091 | Credible Set | purple |
| chr2:156133395 | 2   | 156.1334 | 0.0009067489 | Credible Set | purple |
| chr2:156133510 | 2   | 156.1335 | 0.0010201303 | Credible Set | purple |
| chr2:156215789 | 2   | 156.2158 | 0.0008729584 | Credible Set | purple |
| chr2:156259843 | 2   | 156.2598 | 0.0008729584 | Credible Set | purple |
| chr2:156267477 | 2   | 156.2675 | 0.0008613064 | Credible Set | purple |
| chr2:156269831 | 2   | 156.2698 | 0.0009066928 | Credible Set | purple |
| chr2:156282307 | 2   | 156.2823 | 0.0008729584 | Credible Set | purple |
| chr2:156302628 | 2   | 156.3026 | 0.0008729584 | Credible Set | purple |
| chr2:156302714 | 2   | 156.3027 | 0.0007702117 | Credible Set | purple |
| chr2:156302728 | 2   | 156.3027 | 0.0007702117 | Credible Set | purple |
| chr2:156302741 | 2   | 156.3027 | 0.0008729584 | Credible Set | purple |
| chr2:156303023 | 2   | 156.3030 | 0.0008794303 | Credible Set | purple |
| chr2:156305013 | 2   | 156.3050 | 0.0007059660 | Credible Set | purple |
| chr2:156323079 | 2   | 156.3231 | 0.0008523750 | Credible Set | purple |
| chr2:156343221 | 2   | 156.3432 | 0.0007941062 | Credible Set | purple |
| chr2:156343324 | 2   | 156.3433 | 0.0007956754 | Credible Set | purple |
| chr2:156368682 | 2   | 156.3687 | 0.0008417875 | Credible Set | purple |

## Fine-mapping Regions

| snp            | chr | pos (Mb) | pp           | group        | color  |
|----------------|-----|----------|--------------|--------------|--------|
| chr2:156368698 | 2   | 156.3687 | 0.0008552391 | Credible Set | purple |
| chr2:156378531 | 2   | 156.3785 | 0.0007349361 | Credible Set | purple |
| chr2:156383403 | 2   | 156.3834 | 0.0010412354 | Credible Set | purple |
| chr2:156383404 | 2   | 156.3834 | 0.0010412354 | Credible Set | purple |
| chr2:156383417 | 2   | 156.3834 | 0.0010412354 | Credible Set | purple |
| chr2:156387857 | 2   | 156.3879 | 0.0008729584 | Credible Set | purple |
| chr2:156401411 | 2   | 156.4014 | 0.0013159819 | Credible Set | purple |
| chr2:156407061 | 2   | 156.4071 | 0.0010562196 | Credible Set | purple |
| chr2:156407080 | 2   | 156.4071 | 0.0011150560 | Credible Set | purple |
| chr2:156407368 | 2   | 156.4074 | 0.0013323397 | Credible Set | purple |
| chr2:156417925 | 2   | 156.4179 | 0.0012908080 | Credible Set | purple |
| chr2:156419006 | 2   | 156.4190 | 0.0012792463 | Credible Set | purple |
| chr2:156423785 | 2   | 156.4238 | 0.0012331930 | Credible Set | purple |
| chr2:156449123 | 2   | 156.4491 | 0.0013182908 | Credible Set | purple |
| chr2:156449144 | 2   | 156.4491 | 0.0013182908 | Credible Set | purple |
| chr2:156453473 | 2   | 156.4535 | 0.0010382545 | Credible Set | purple |
| chr2:156453552 | 2   | 156.4536 | 0.0008230674 | Credible Set | purple |
| chr2:156453983 | 2   | 156.4540 | 0.0016877984 | Credible Set | purple |
| chr2:156455282 | 2   | 156.4553 | 0.0049765780 | Credible Set | purple |
| chr2:156455298 | 2   | 156.4553 | 0.0050296727 | Credible Set | purple |
| chr2:156455671 | 2   | 156.4557 | 0.0033185505 | Credible Set | purple |
| chr2:156455717 | 2   | 156.4557 | 0.0042939876 | Credible Set | purple |
| chr2:156465034 | 2   | 156.4650 | 0.0013182908 | Credible Set | purple |
| chr2:156465082 | 2   | 156.4651 | 0.0013182908 | Credible Set | purple |
| chr2:156465086 | 2   | 156.4651 | 0.0013182908 | Credible Set | purple |
| chr2:156465109 | 2   | 156.4651 | 0.0013182908 | Credible Set | purple |
| chr2:156465137 | 2   | 156.4651 | 0.0013182908 | Credible Set | purple |
| chr2:156465975 | 2   | 156.4660 | 0.0013182908 | Credible Set | purple |
| chr2:156468230 | 2   | 156.4682 | 0.0014013567 | Credible Set | purple |
| chr2:156474927 | 2   | 156.4749 | 0.0013183978 | Credible Set | purple |
| chr2:156483143 | 2   | 156.4831 | 0.0013082891 | Credible Set | purple |
| chr2:156488289 | 2   | 156.4883 | 0.0012884571 | Credible Set | purple |
| chr2:156491527 | 2   | 156.4915 | 0.0012903486 | Credible Set | purple |
| chr2:156491541 | 2   | 156.4915 | 0.0015609781 | Credible Set | purple |
| chr2:156491557 | 2   | 156.4916 | 0.0015453479 | Credible Set | purple |
| chr2:156521595 | 2   | 156.5216 | 0.0011542601 | Credible Set | purple |

## Fine-mapping Regions

| snp            | chr | pos (Mb) | pp           | group        | color  |
|----------------|-----|----------|--------------|--------------|--------|
| chr2:156521639 | 2   | 156.5216 | 0.0011669190 | Credible Set | purple |
| chr2:156530706 | 2   | 156.5307 | 0.0012401035 | Credible Set | purple |
| chr2:156532009 | 2   | 156.5320 | 0.0012860338 | Credible Set | purple |
| chr2:156532011 | 2   | 156.5320 | 0.0012772788 | Credible Set | purple |
| chr2:156532178 | 2   | 156.5322 | 0.0013163567 | Credible Set | purple |
| chr2:156567043 | 2   | 156.5670 | 0.0013236906 | Credible Set | purple |
| chr2:156567147 | 2   | 156.5671 | 0.0024815428 | Credible Set | purple |
| chr2:156567188 | 2   | 156.5672 | 0.0024638254 | Credible Set | purple |
| chr2:156567685 | 2   | 156.5677 | 0.0013753975 | Credible Set | purple |
| chr2:156576405 | 2   | 156.5764 | 0.0013780037 | Credible Set | purple |
| chr2:156576851 | 2   | 156.5769 | 0.0012061116 | Credible Set | purple |
| chr2:156577083 | 2   | 156.5771 | 0.0013186227 | Credible Set | purple |
| chr2:156585381 | 2   | 156.5854 | 0.0013195477 | Credible Set | purple |
| chr2:156587373 | 2   | 156.5874 | 0.0012676667 | Credible Set | purple |
| chr2:156587398 | 2   | 156.5874 | 0.0012214752 | Credible Set | purple |
| chr2:156592202 | 2   | 156.5922 | 0.0013162598 | Credible Set | purple |
| chr2:156595258 | 2   | 156.5953 | 0.0011612599 | Credible Set | purple |
| chr2:156632710 | 2   | 156.6327 | 0.0012542357 | Credible Set | purple |
| chr2:156632738 | 2   | 156.6327 | 0.0012339589 | Credible Set | purple |
| chr2:156632859 | 2   | 156.6329 | 0.0012190144 | Credible Set | purple |
| chr2:156641079 | 2   | 156.6411 | 0.0012057540 | Credible Set | purple |
| chr2:156641293 | 2   | 156.6413 | 0.0012257382 | Credible Set | purple |
| chr2:156649922 | 2   | 156.6499 | 0.0010137839 | Credible Set | purple |
| chr2:156649929 | 2   | 156.6499 | 0.0010224134 | Credible Set | purple |
| chr2:156650908 | 2   | 156.6509 | 0.0012558604 | Credible Set | purple |
| chr2:156668062 | 2   | 156.6681 | 0.0009524346 | Credible Set | purple |
| chr2:156668618 | 2   | 156.6686 | 0.0012820443 | Credible Set | purple |
| chr2:156704128 | 2   | 156.7041 | 0.0011191801 | Credible Set | purple |
| chr2:156704178 | 2   | 156.7042 | 0.0011197156 | Credible Set | purple |
| chr2:156711128 | 2   | 156.7111 | 0.0013186286 | Credible Set | purple |
| chr2:156743106 | 2   | 156.7431 | 0.0011996008 | Credible Set | purple |
| chr2:156743119 | 2   | 156.7431 | 0.0012283247 | Credible Set | purple |
| chr2:156764741 | 2   | 156.7647 | 0.0010280520 | Credible Set | purple |
| chr2:156764772 | 2   | 156.7648 | 0.0010593779 | Credible Set | purple |
| chr2:156770397 | 2   | 156.7704 | 0.0045005840 | Credible Set | purple |
| chr2:156795214 | 2   | 156.7952 | 0.0041958350 | Credible Set | purple |

## Fine-mapping Regions

| snp            | chr | pos (Mb) | pp           | group        | color  |
|----------------|-----|----------|--------------|--------------|--------|
| chr2:156795236 | 2   | 156.7952 | 0.0040398591 | Credible Set | purple |
| chr2:156803978 | 2   | 156.8040 | 0.0045005840 | Credible Set | purple |
| chr2:156812752 | 2   | 156.8128 | 0.0078204314 | Credible Set | purple |
| chr2:156815749 | 2   | 156.8157 | 0.0037639566 | Credible Set | purple |
| chr2:156815751 | 2   | 156.8158 | 0.0036573116 | Credible Set | purple |
| chr2:156815769 | 2   | 156.8158 | 0.0036428636 | Credible Set | purple |
| chr2:156825758 | 2   | 156.8258 | 0.0042301617 | Credible Set | purple |
| chr2:156825771 | 2   | 156.8258 | 0.0042233612 | Credible Set | purple |
| chr2:156825785 | 2   | 156.8258 | 0.0042233612 | Credible Set | purple |
| chr2:156825839 | 2   | 156.8258 | 0.0041361878 | Credible Set | purple |
| chr2:156825844 | 2   | 156.8258 | 0.0041361878 | Credible Set | purple |
| chr2:156825876 | 2   | 156.8259 | 0.0041361878 | Credible Set | purple |
| chr2:156845905 | 2   | 156.8459 | 0.0043854695 | Credible Set | purple |
| chr2:156861736 | 2   | 156.8617 | 0.0015350425 | Credible Set | purple |
| chr2:156861749 | 2   | 156.8617 | 0.0015350425 | Credible Set | purple |
| chr2:156861787 | 2   | 156.8618 | 0.0015350425 | Credible Set | purple |
| chr2:156861800 | 2   | 156.8618 | 0.0015350425 | Credible Set | purple |
| chr2:156861931 | 2   | 156.8619 | 0.0043039530 | Credible Set | purple |
| chr2:156862039 | 2   | 156.8620 | 0.0008416619 | Credible Set | purple |
| chr2:156862050 | 2   | 156.8621 | 0.0008416619 | Credible Set | purple |
| chr2:156862066 | 2   | 156.8621 | 0.0008477391 | Credible Set | purple |
| chr2:156862185 | 2   | 156.8622 | 0.0041150550 | Credible Set | purple |
| chr2:156862198 | 2   | 156.8622 | 0.0041150550 | Credible Set | purple |
| chr2:156882805 | 2   | 156.8828 | 0.0044848486 | Credible Set | purple |
| chr2:156882992 | 2   | 156.8830 | 0.0041668362 | Credible Set | purple |
| chr2:156883081 | 2   | 156.8831 | 0.0043785543 | Credible Set | purple |
| chr2:156883502 | 2   | 156.8835 | 0.0045005840 | Credible Set | purple |
| chr2:156886515 | 2   | 156.8865 | 0.0047444442 | Credible Set | purple |
| chr2:156886654 | 2   | 156.8867 | 0.0048164039 | Credible Set | purple |
| chr2:156887147 | 2   | 156.8871 | 0.0073998449 | Credible Set | purple |
| chr2:156887169 | 2   | 156.8872 | 0.0074553226 | Credible Set | purple |
| chr2:156948001 | 2   | 156.9480 | 0.0051733739 | Credible Set | purple |
| chr2:156959200 | 2   | 156.9592 | 0.0114860151 | Credible Set | purple |
| chr2:156959224 | 2   | 156.9592 | 0.0116728039 | Credible Set | purple |
| chr2:156959230 | 2   | 156.9592 | 0.0115102273 | Credible Set | purple |
| chr2:156959240 | 2   | 156.9592 | 0.0111861194 | Credible Set | purple |

## Fine-mapping Regions

| snp            | chr | pos (Mb) | pp          | group        | color  |
|----------------|-----|----------|-------------|--------------|--------|
| chr2:156973206 | 2   | 156.9732 | 0.004671987 | Credible Set | purple |
| chr2:156973473 | 2   | 156.9735 | 0.004701081 | Credible Set | purple |
| chr2:157010815 | 2   | 157.0108 | 0.004521964 | Credible Set | purple |
| chr2:157016739 | 2   | 157.0167 | 0.004048277 | Credible Set | purple |
| chr2:157017028 | 2   | 157.0170 | 0.004618923 | Credible Set | purple |
| chr2:157017101 | 2   | 157.0171 | 0.005369631 | Credible Set | purple |
| chr2:157017479 | 2   | 157.0175 | 0.005066103 | Credible Set | purple |
| chr2:157017498 | 2   | 157.0175 | 0.004966103 | Credible Set | purple |
| chr2:157027114 | 2   | 157.0271 | 0.004757518 | Credible Set | purple |
| chr2:157027115 | 2   | 157.0271 | 0.004757518 | Credible Set | purple |
| chr2:157027346 | 2   | 157.0273 | 0.004534067 | Credible Set | purple |
| chr2:157027552 | 2   | 157.0276 | 0.004500584 | Credible Set | purple |
| chr2:157027594 | 2   | 157.0276 | 0.004500584 | Credible Set | purple |
| chr2:157033406 | 2   | 157.0334 | 0.004500584 | Credible Set | purple |
| chr2:157033457 | 2   | 157.0335 | 0.004500584 | Credible Set | purple |
| chr2:157033569 | 2   | 157.0336 | 0.004500584 | Credible Set | purple |
| chr2:157033589 | 2   | 157.0336 | 0.004500584 | Credible Set | purple |
| chr2:157037970 | 2   | 157.0380 | 0.004941586 | Credible Set | purple |
| chr2:157040364 | 2   | 157.0404 | 0.003861107 | Credible Set | purple |
| chr2:157040379 | 2   | 157.0404 | 0.003985516 | Credible Set | purple |
| chr2:157040564 | 2   | 157.0406 | 0.004500584 | Credible Set | purple |
| chr2:157059250 | 2   | 157.0592 | 0.004500584 | Credible Set | purple |
| chr2:157059408 | 2   | 157.0594 | 0.004498129 | Credible Set | purple |
| chr2:157059810 | 2   | 157.0598 | 0.004499053 | Credible Set | purple |
| chr2:157059893 | 2   | 157.0599 | 0.004089039 | Credible Set | purple |
| chr2:157063511 | 2   | 157.0635 | 0.004500584 | Credible Set | purple |
| chr2:157065641 | 2   | 157.0656 | 0.004378791 | Credible Set | purple |
| chr2:157075626 | 2   | 157.0756 | 0.004500584 | Credible Set | purple |
| chr2:157075934 | 2   | 157.0759 | 0.004538454 | Credible Set | purple |
| chr2:157138758 | 2   | 157.1388 | 0.001397930 | Credible Set | purple |
| chr2:157138759 | 2   | 157.1388 | 0.001238887 | Credible Set | purple |
| chr2:157138913 | 2   | 157.1389 | 0.004518281 | Credible Set | purple |
| chr2:157144291 | 2   | 157.1443 | 0.004500584 | Credible Set | purple |
| chr2:157145837 | 2   | 157.1458 | 0.004500834 | Credible Set | purple |
| chr2:157149696 | 2   | 157.1497 | 0.004536776 | Credible Set | purple |
| chr2:157170168 | 2   | 157.1702 | 0.004499389 | Credible Set | purple |

## Fine-mapping Regions

| snp            | chr | pos (Mb) | pp          | group        | color  |
|----------------|-----|----------|-------------|--------------|--------|
| chr2:157170289 | 2   | 157.1703 | 0.003327649 | Credible Set | purple |
| chr2:157170311 | 2   | 157.1703 | 0.003320108 | Credible Set | purple |
| chr2:157234145 | 2   | 157.2341 | 0.004378489 | Credible Set | purple |
| chr2:157234194 | 2   | 157.2342 | 0.004244260 | Credible Set | purple |
| chr2:157234584 | 2   | 157.2346 | 0.005846621 | Credible Set | purple |
| chr2:157234605 | 2   | 157.2346 | 0.006023225 | Credible Set | purple |
| chr2:157234716 | 2   | 157.2347 | 0.012394370 | Credible Set | purple |
| chr2:157234718 | 2   | 157.2347 | 0.012313502 | Credible Set | purple |
| chr2:157234722 | 2   | 157.2347 | 0.012368836 | Credible Set | purple |
| chr2:157244801 | 2   | 157.2448 | 0.003053452 | Credible Set | purple |
| chr2:157245205 | 2   | 157.2452 | 0.004377639 | Credible Set | purple |
| chr2:157245270 | 2   | 157.2453 | 0.004323443 | Credible Set | purple |
| chr2:157271470 | 2   | 157.2715 | 0.004546292 | Credible Set | purple |
| chr2:157323455 | 2   | 157.3235 | 0.003731176 | Credible Set | purple |
| chr2:157323490 | 2   | 157.3235 | 0.004142781 | Credible Set | purple |
| chr2:157323542 | 2   | 157.3235 | 0.004164396 | Credible Set | purple |
| chr2:157328889 | 2   | 157.3289 | 0.003226906 | Credible Set | purple |
| chr2:157350851 | 2   | 157.3509 | 0.003485881 | Credible Set | purple |
| chr2:157356604 | 2   | 157.3566 | 0.007146490 | Credible Set | purple |
| chr2:157383750 | 2   | 157.3837 | 0.007447453 | Credible Set | purple |
| chr2:157384030 | 2   | 157.3840 | 0.016024599 | Credible Set | purple |
| chr2:157384046 | 2   | 157.3840 | 0.016005888 | Credible Set | purple |
| chr2:157393248 | 2   | 157.3932 | 0.002529089 | Credible Set | purple |
| chr2:157393326 | 2   | 157.3933 | 0.003629860 | Credible Set | purple |
| chr2:157393328 | 2   | 157.3933 | 0.003109633 | Credible Set | purple |
| chr2:157393885 | 2   | 157.3939 | 0.003844495 | Credible Set | purple |
| chr2:157393913 | 2   | 157.3939 | 0.003905813 | Credible Set | purple |
| chr2:157393914 | 2   | 157.3939 | 0.003855055 | Credible Set | purple |
| chr2:157393915 | 2   | 157.3939 | 0.003859032 | Credible Set | purple |
| chr2:157396118 | 2   | 157.3961 | 0.004921267 | Credible Set | purple |
| chr2:157396325 | 2   | 157.3963 | 0.001303472 | Credible Set | purple |
| chr2:157396340 | 2   | 157.3963 | 0.001310087 | Credible Set | purple |
| chr2:157396357 | 2   | 157.3964 | 0.001310087 | Credible Set | purple |
| chr2:157396513 | 2   | 157.3965 | 0.005767159 | Credible Set | purple |
| chr2:157401494 | 2   | 157.4015 | 0.005643284 | Credible Set | purple |
| chr2:157425583 | 2   | 157.4256 | 0.005767159 | Credible Set | purple |

## Fine-mapping Regions

| snp            | chr | pos (Mb) | pp          | group        | color  |
|----------------|-----|----------|-------------|--------------|--------|
| chr2:157434588 | 2   | 157.4346 | 0.005767159 | Credible Set | purple |
| chr2:157439371 | 2   | 157.4394 | 0.005767159 | Credible Set | purple |
| chr2:157455578 | 2   | 157.4556 | 0.005520168 | Credible Set | purple |
| chr2:157458440 | 2   | 157.4584 | 0.005767159 | Credible Set | purple |
| chr2:157464790 | 2   | 157.4648 | 0.003979447 | Credible Set | purple |
| chr2:157464811 | 2   | 157.4648 | 0.003979447 | Credible Set | purple |
| chr2:157464835 | 2   | 157.4648 | 0.003979447 | Credible Set | purple |
| chr2:157464946 | 2   | 157.4649 | 0.005768230 | Credible Set | purple |
| chr2:157465338 | 2   | 157.4653 | 0.005786666 | Credible Set | purple |
| chr2:157502041 | 2   | 157.5020 | 0.007384423 | Credible Set | purple |
| chr2:157502044 | 2   | 157.5020 | 0.005572784 | Credible Set | purple |
| chr2:157549374 | 2   | 157.5494 | 0.005672009 | Credible Set | purple |
| chr2:157611240 | 2   | 157.6112 | 0.001999621 | Credible Set | purple |
| chr2:157611267 | 2   | 157.6113 | 0.001994993 | Credible Set | purple |
| chr2:157611281 | 2   | 157.6113 | 0.001994993 | Credible Set | purple |
| chr2:157611292 | 2   | 157.6113 | 0.001994993 | Credible Set | purple |
| chr2:157611294 | 2   | 157.6113 | 0.001994993 | Credible Set | purple |
| chr2:157630394 | 2   | 157.6304 | 0.005983166 | Credible Set | purple |
| chr2:157630611 | 2   | 157.6306 | 0.005899822 | Credible Set | purple |
| chr2:157630938 | 2   | 157.6309 | 0.007912554 | Credible Set | purple |
| chr2:157630968 | 2   | 157.6310 | 0.007977824 | Credible Set | purple |
| chr2:157630998 | 2   | 157.6310 | 0.007909786 | Credible Set | purple |
| chr2:157635749 | 2   | 157.6357 | 0.005178926 | Credible Set | purple |
| chr2:158322238 | 2   | 158.3222 | 0.003802500 | Credible Set | purple |
| chr2:158334991 | 2   | 158.3350 | 0.003391315 | Credible Set | purple |
| chr2:158335036 | 2   | 158.3350 | 0.002878618 | Credible Set | purple |
| chr2:158380870 | 2   | 158.3809 | 0.003885663 | Credible Set | purple |
| chr2:158380953 | 2   | 158.3810 | 0.003892789 | Credible Set | purple |
| chr2:158424885 | 2   | 158.4249 | 0.001092579 | Credible Set | purple |
| chr2:158424892 | 2   | 158.4249 | 0.001092579 | Credible Set | purple |
| chr2:158432408 | 2   | 158.4324 | 0.004030962 | Credible Set | purple |
| chr2:158463993 | 2   | 158.4640 | 0.003605254 | Credible Set | purple |
| chr2:158499568 | 2   | 158.4996 | 0.003532919 | Credible Set | purple |
| chr2:158499611 | 2   | 158.4996 | 0.003603675 | Credible Set | purple |
| chr2:158518637 | 2   | 158.5186 | 0.002402589 | Credible Set | purple |
| chr2:158518964 | 2   | 158.5190 | 0.003409110 | Credible Set | purple |



# Fine-mapping Regions

| snp            | chr | pos (Mb) | pp          | group        | color  |
|----------------|-----|----------|-------------|--------------|--------|
| chr2:158519003 | 2   | 158.5190 | 0.003409110 | Credible Set | purple |
| chr2:158523085 | 2   | 158.5231 | 0.001070763 | Credible Set | purple |
| chr2:158523125 | 2   | 158.5231 | 0.001083386 | Credible Set | purple |
| chr2:158523133 | 2   | 158.5231 | 0.001075110 | Credible Set | purple |
| chr2:158523135 | 2   | 158.5231 | 0.001069148 | Credible Set | purple |
| chr2:158531021 | 2   | 158.5310 | 0.001788435 | Credible Set | purple |
| chr2:158591403 | 2   | 158.5914 | 0.003891379 | Credible Set | purple |
| chr2:158591550 | 2   | 158.5916 | 0.001241109 | Credible Set | purple |
| chr2:158591613 | 2   | 158.5916 | 0.001225800 | Credible Set | purple |
| chr2:158601272 | 2   | 158.6013 | 0.003826526 | Credible Set | purple |
| chr2:158625324 | 2   | 158.6253 | 0.003893113 | Credible Set | purple |
| chr2:158625366 | 2   | 158.6254 | 0.003893113 | Credible Set | purple |
| chr2:158627877 | 2   | 158.6279 | 0.007562548 | Credible Set | purple |
| chr2:158627920 | 2   | 158.6279 | 0.007562548 | Credible Set | purple |
| chr2:158628144 | 2   | 158.6281 | 0.003620250 | Credible Set | purple |
| chr2:158628165 | 2   | 158.6282 | 0.003632114 | Credible Set | purple |
| chr2:158631398 | 2   | 158.6314 | 0.001314150 | Credible Set | purple |
| chr2:158631624 | 2   | 158.6316 | 0.001912639 | Credible Set | purple |
| chr2:158640014 | 2   | 158.6400 | 0.003732603 | Credible Set | purple |
| chr2:158665126 | 2   | 158.6651 | 0.004378129 | Credible Set | purple |

F34 GBS, tibia length (cm)

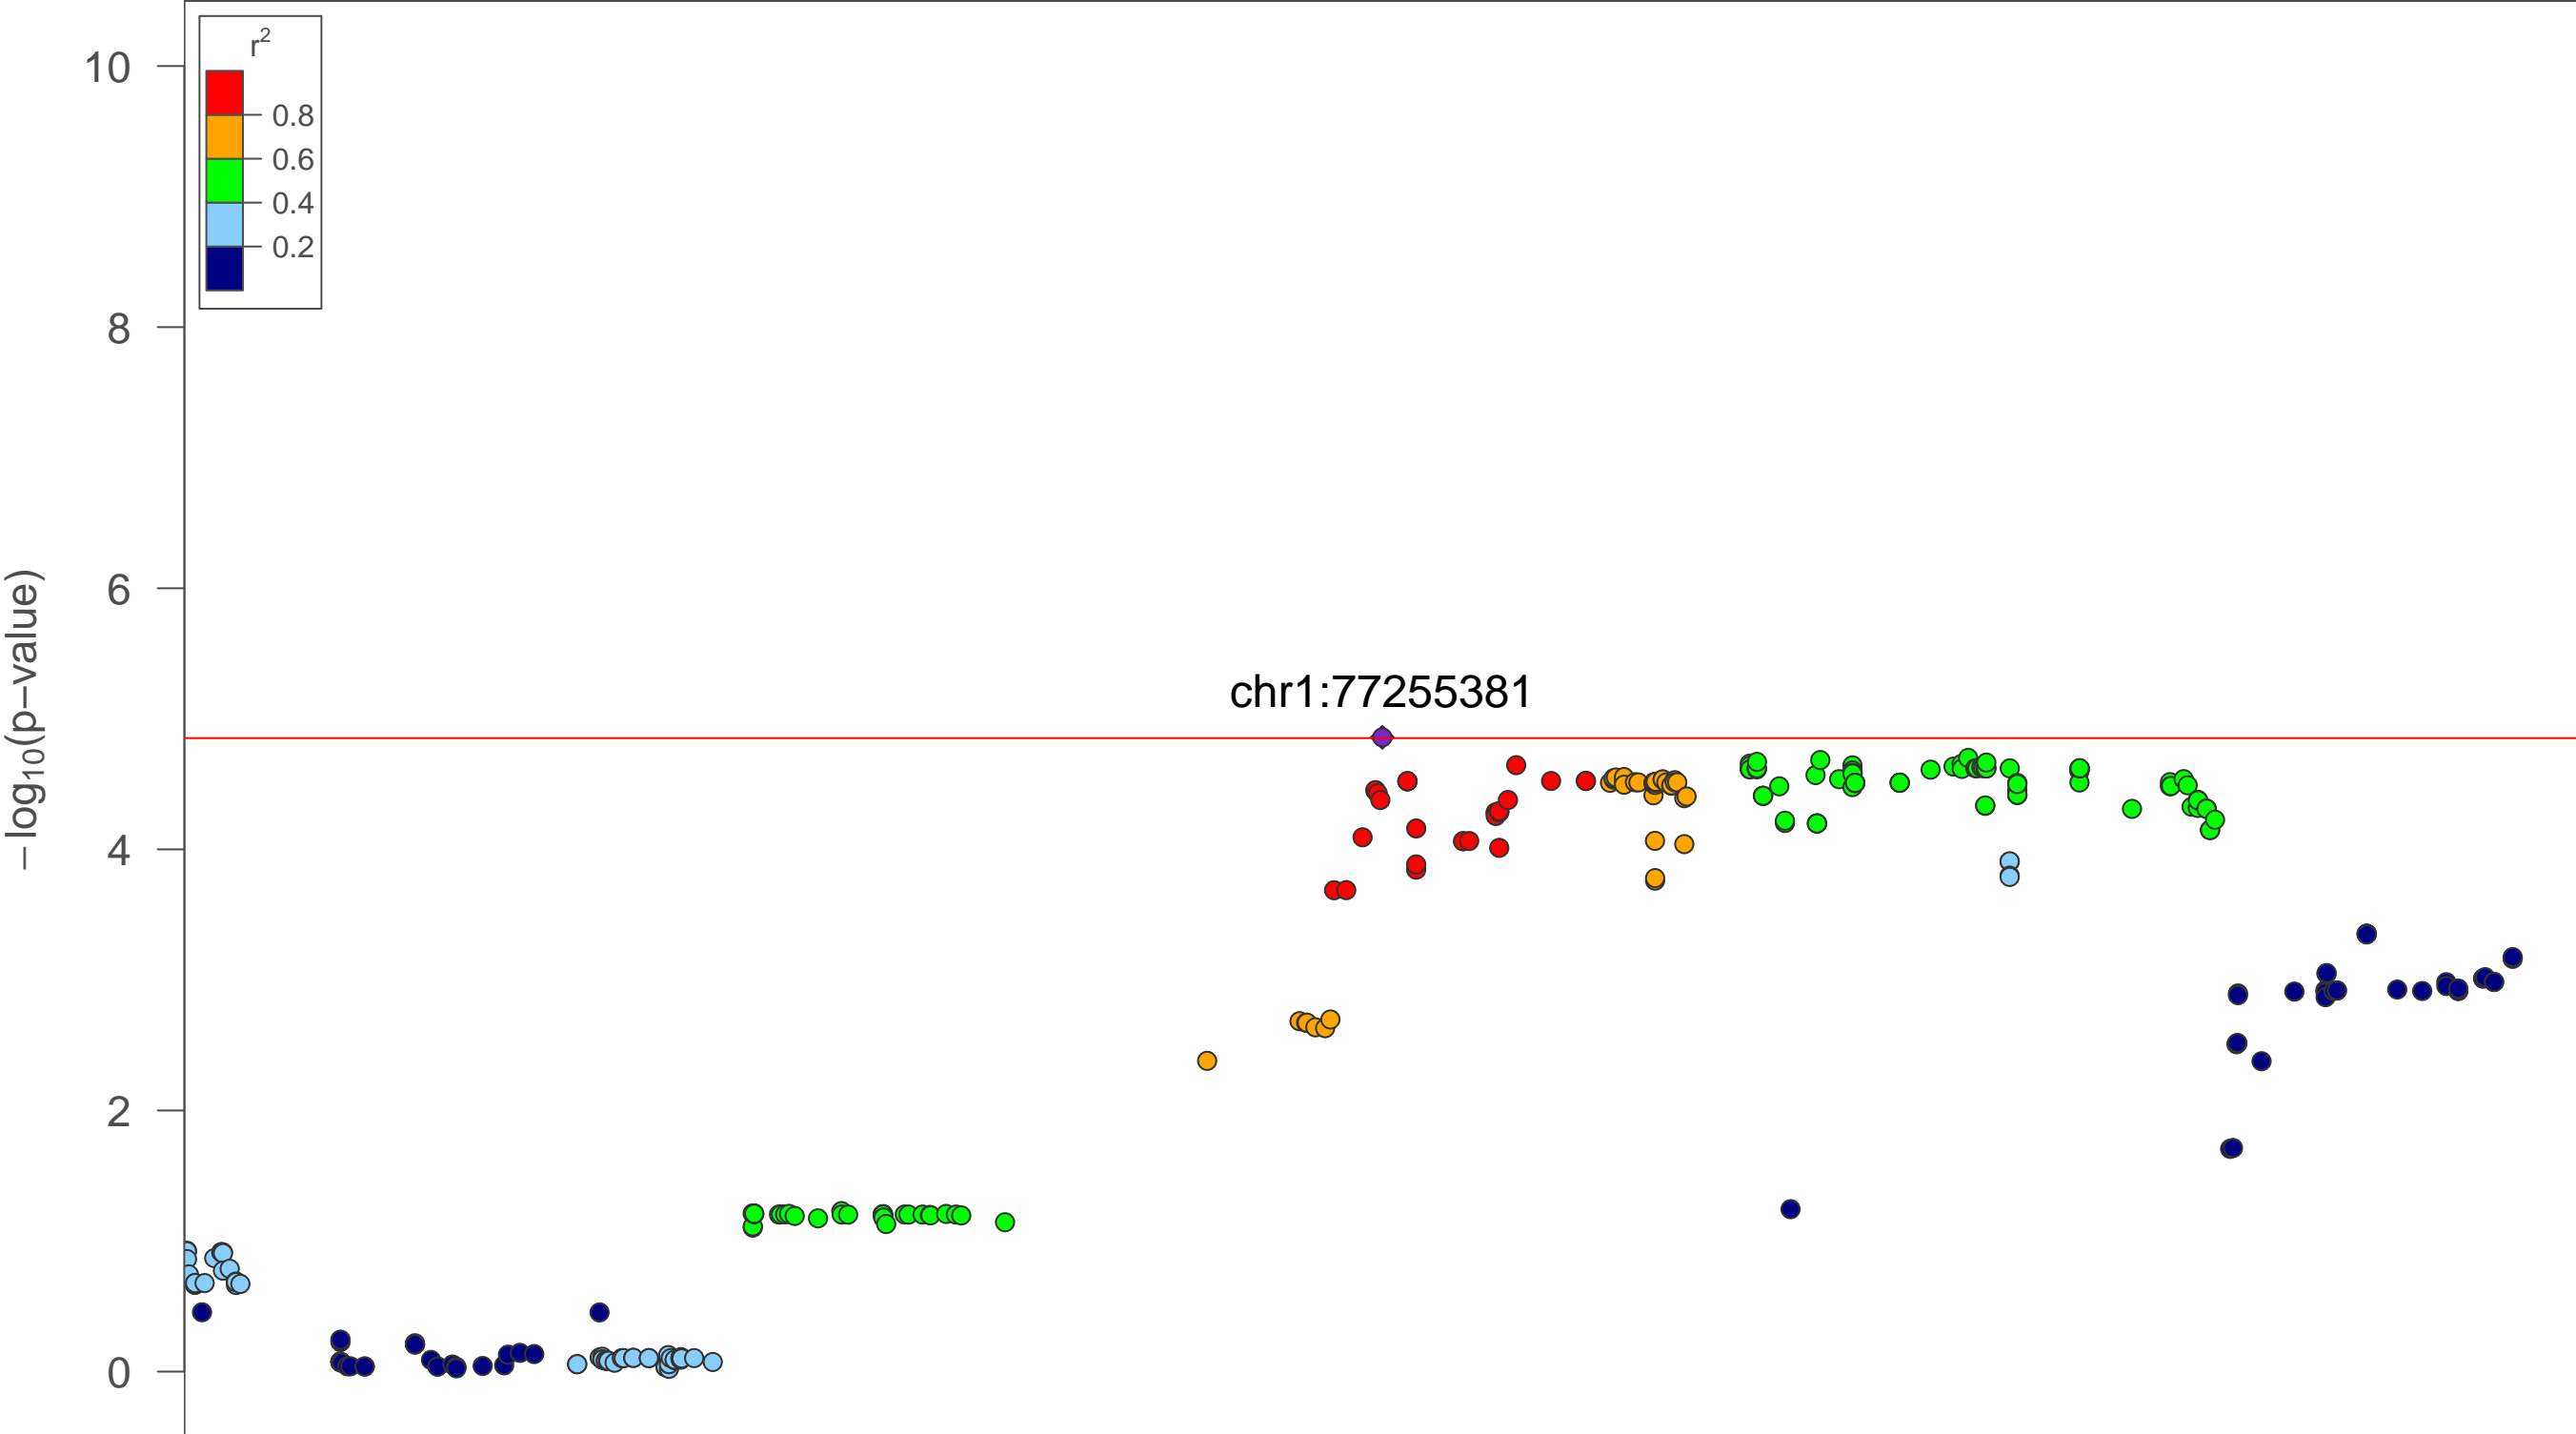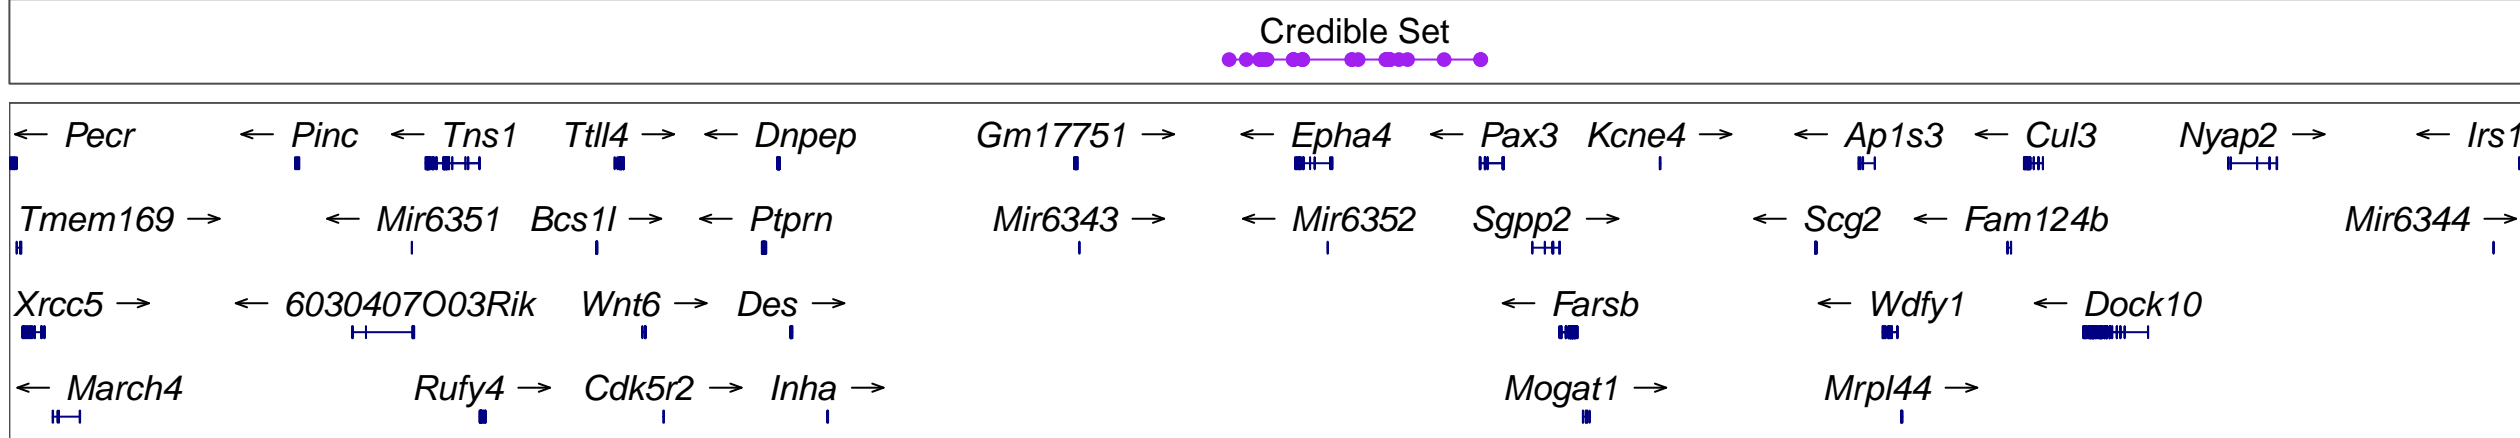

62 genes omitted

date: Thu Oct 25 17:14:39 2018  
build: F34GBS  
display range: chr1:72255381–82255381 [72255381–82255381]  
hilite range: 0 – 0 [ 0 – 0 ]  
reference SNP: chr1:77255381  
number of SNPs plotted: 308  
min P-value: 1.39E–5 [chr1:77255381]  
max P-value: 9.52E–1 [chr1:74278512]  
omitted Genes: Smarcal1, Ankar, Rpl37a  
omitted Genes: Igfbp2, Igfbp5, Tnp1  
omitted Genes: 1700027A15Rik, D530049I02Rik, Cxcr2  
omitted Genes: Cxcr1, Mir1928, Arpc2  
omitted Genes: Gpbar1, Aamp, Pnkd  
omitted Genes: Tmbim1, Catip, Slc11a1  
omitted Genes: Ctdsp1, Mir26b, Vil1  
omitted Genes: Usp37, Cnot9, Plcd4  
omitted Genes: Zfp142, Rnf25, Stk36  
omitted Genes: Cyp27a1, Prkag3, Wnt10a  
omitted Genes: Fev, Cryba2, Mir375  
omitted Genes: Ccdc108, Ihh, Nhej1  
omitted Genes: Slc23a3, Cnppd1, Fam134a  
omitted Genes: Zfand2b, Abcb6, Atg9a  
omitted Genes: Ankzf1, Glb1l, Stk16  
omitted Genes: Tuba4a, A630095N17Rik, Dnajb2  
omitted Genes: Resp18, Gm15179, Speg  
omitted Genes: Gmppa, Asic4, Chpf  
omitted Genes: Tmem198, Obsl1, Stk11ip  
omitted Genes: Slc4a3, Utp14b, Acsl3  
omitted Genes: Serpine2, 1700016L21Rik

## Fine-mapping Regions

| snp           | chr | pos (Mb) | pp          | group        | color  |
|---------------|-----|----------|-------------|--------------|--------|
| chr1:77104885 | 1   | 77.10488 | 0.008126436 | Credible Set | purple |
| chr1:77172984 | 1   | 77.17298 | 0.019564894 | Credible Set | purple |
| chr1:77226748 | 1   | 77.22675 | 0.042605449 | Credible Set | purple |
| chr1:77226771 | 1   | 77.22677 | 0.043033112 | Credible Set | purple |
| chr1:77236123 | 1   | 77.23612 | 0.040789617 | Credible Set | purple |
| chr1:77247183 | 1   | 77.24718 | 0.036464543 | Credible Set | purple |
| chr1:77255381 | 1   | 77.25538 | 0.104374844 | Credible Set | purple |
| chr1:77360230 | 1   | 77.36023 | 0.049821912 | Credible Set | purple |
| chr1:77360231 | 1   | 77.36023 | 0.049911801 | Credible Set | purple |
| chr1:77360235 | 1   | 77.36024 | 0.050042131 | Credible Set | purple |
| chr1:77396673 | 1   | 77.39667 | 0.011417742 | Credible Set | purple |
| chr1:77396674 | 1   | 77.39667 | 0.012455288 | Credible Set | purple |
| chr1:77396959 | 1   | 77.39696 | 0.022673149 | Credible Set | purple |
| chr1:77592858 | 1   | 77.59286 | 0.018331029 | Credible Set | purple |
| chr1:77592859 | 1   | 77.59286 | 0.018331029 | Credible Set | purple |
| chr1:77617819 | 1   | 77.61782 | 0.018389979 | Credible Set | purple |
| chr1:77728800 | 1   | 77.72880 | 0.029422136 | Credible Set | purple |
| chr1:77728804 | 1   | 77.72880 | 0.029670651 | Credible Set | purple |
| chr1:77728811 | 1   | 77.72881 | 0.027913013 | Credible Set | purple |
| chr1:77743267 | 1   | 77.74327 | 0.029821353 | Credible Set | purple |
| chr1:77743271 | 1   | 77.74327 | 0.029699371 | Credible Set | purple |
| chr1:77743297 | 1   | 77.74330 | 0.030277323 | Credible Set | purple |
| chr1:77743443 | 1   | 77.74344 | 0.016399557 | Credible Set | purple |
| chr1:77779980 | 1   | 77.77998 | 0.036476533 | Credible Set | purple |
| chr1:77814150 | 1   | 77.81415 | 0.065375684 | Credible Set | purple |
| chr1:77959635 | 1   | 77.95964 | 0.050164984 | Credible Set | purple |
| chr1:78104946 | 1   | 78.10495 | 0.050164984 | Credible Set | purple |
| chr1:78105022 | 1   | 78.10502 | 0.050164984 | Credible Set | purple |

F34 GBS, tibia length (cm)

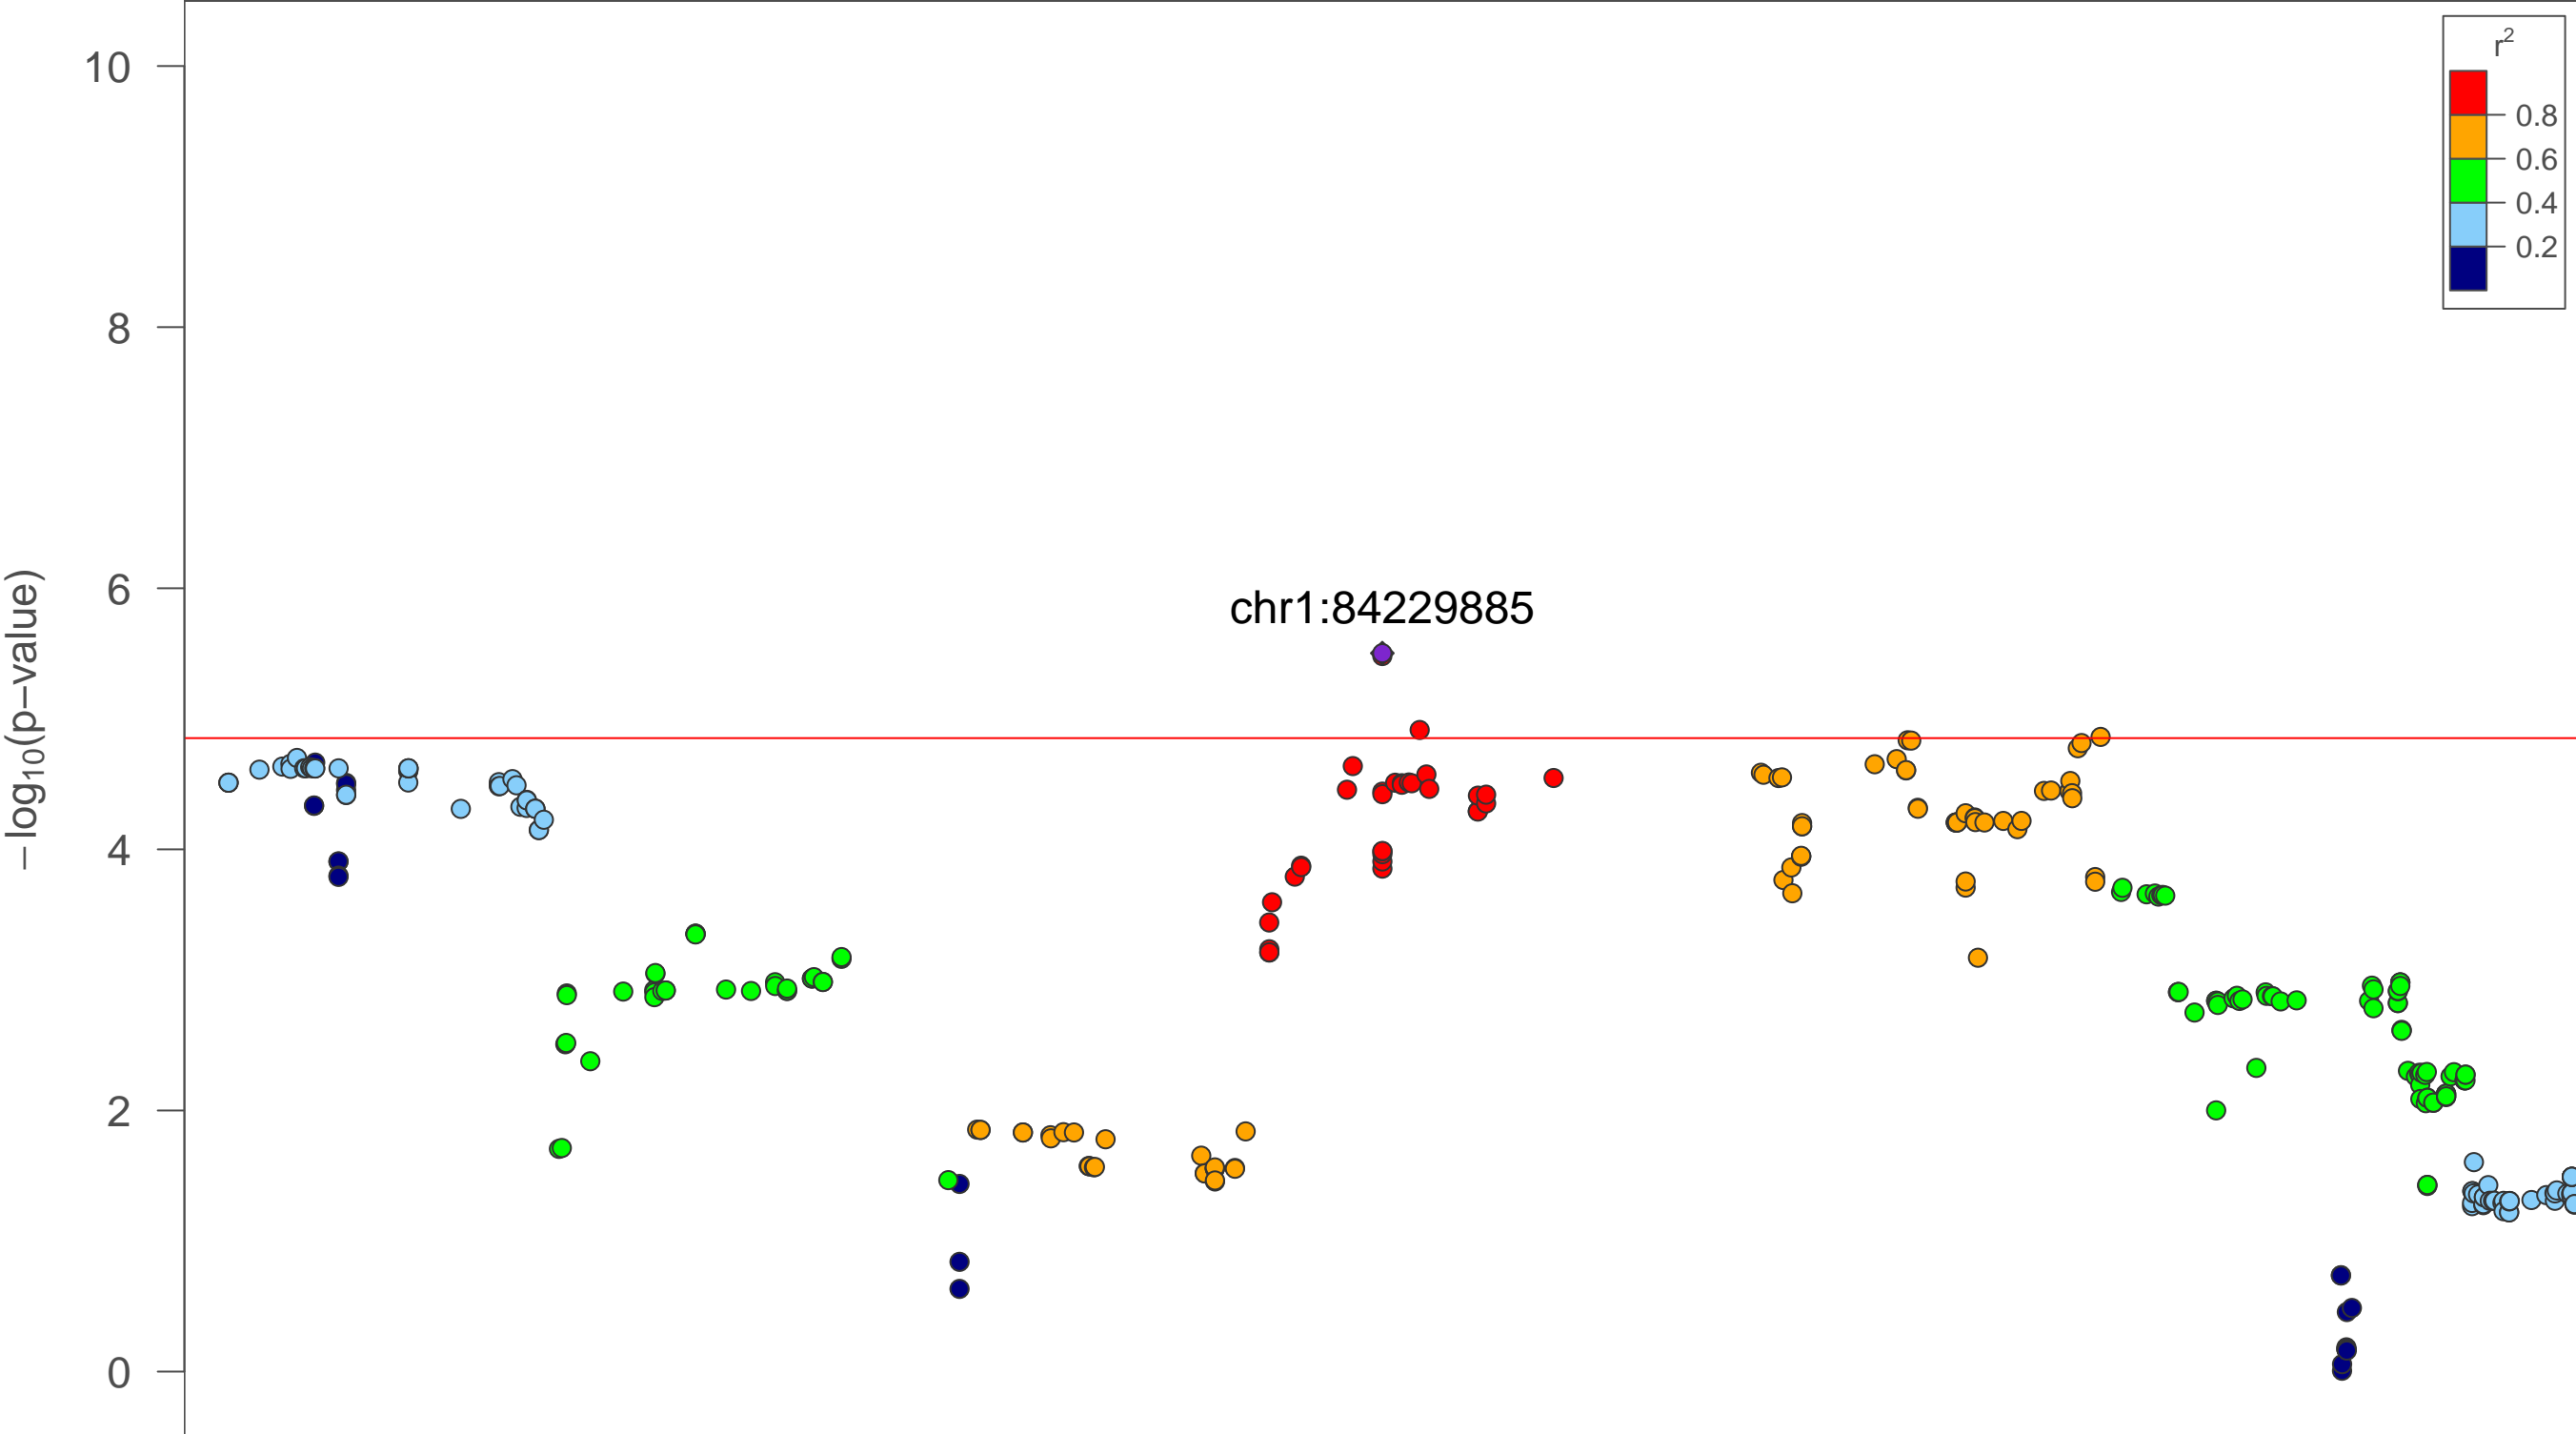

Credible Set

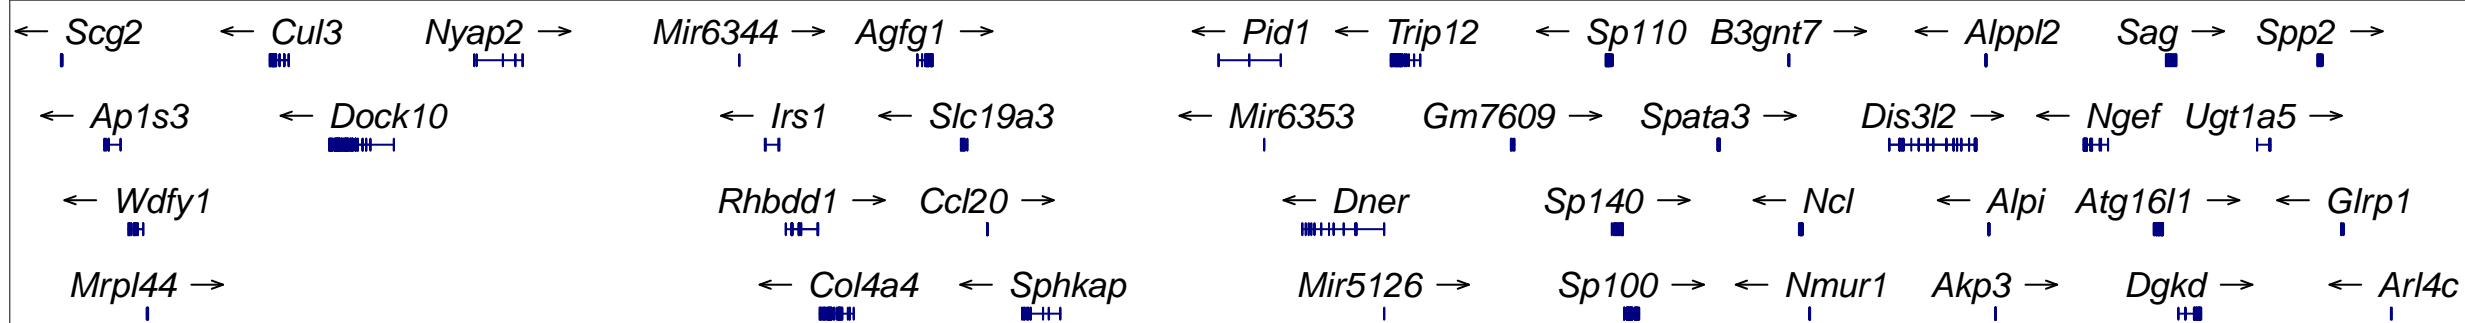

61 genes  
omitted

date: Thu Oct 25 17:14:48 2018  
build: F34GBS  
display range: chr1:79229885–89229885 [79229885–89229885]  
hilite range: 0 – 0 [ 0 – 0 ]  
reference SNP: chr1:84229885  
number of SNPs plotted: 324  
min P-value: 3.14E–6 [chr1:84229885]  
max P-value: 9.85E–1 [chr1:88235333]  
omitted Genes: Serpine2, Fam124b, 1700016L21Rik  
omitted Genes: Col4a3, Mff, Tm4sf20  
omitted Genes: Krtap28–13, Daw1, Fbxo36  
omitted Genes: Slc16a14, A530032D15Rik, C130026I21Rik  
omitted Genes: A630001G21Rik, Mir8096, 9930111H07Rik  
omitted Genes: Cab39, Itm2c, 4933407L21Rik  
omitted Genes: Gpr55, 2810459M11Rik, Psmd1  
omitted Genes: Htr2b, Armc9, Snora75  
omitted Genes: Gm24148, Snord82, C130036L24Rik  
omitted Genes: 1700019O17Rik, Ptma, Pde6d  
omitted Genes: Cops7b, Nppc, Ecel1  
omitted Genes: Prss56, Chrnd, Chrng  
omitted Genes: Eif4e2, Efhd1, Gigyf2  
omitted Genes: Kcnj13, 3110079O15Rik, Neu2  
omitted Genes: Inpp5d, Scarna6, Gm19582  
omitted Genes: Usp40, Ugt1a10, Ugt1a9  
omitted Genes: Ugt1a7c, Ugt1a6b, Ugt1a6a  
omitted Genes: Ugt1a2, Dnajb3, Ugt1a1  
omitted Genes: Mroh2a, Hjurp, Trpm8  
omitted Genes: Gm19589, Platr5, 1700067G17Rik  
omitted Genes: Sh3bp4

## Fine-mapping Regions

| snp           | chr | pos (Mb) | pp          | group        | color  |
|---------------|-----|----------|-------------|--------------|--------|
| chr1:83769887 | 1   | 83.76989 | 0.003606986 | Credible Set | purple |
| chr1:83864780 | 1   | 83.86478 | 0.005513547 | Credible Set | purple |
| chr1:83891050 | 1   | 83.89105 | 0.006615451 | Credible Set | purple |
| chr1:83891408 | 1   | 83.89141 | 0.006462805 | Credible Set | purple |
| chr1:84082487 | 1   | 84.08249 | 0.023491739 | Credible Set | purple |
| chr1:84106829 | 1   | 84.10683 | 0.034932382 | Credible Set | purple |
| chr1:84229883 | 1   | 84.22988 | 0.223038567 | Credible Set | purple |
| chr1:84229885 | 1   | 84.22988 | 0.234056135 | Credible Set | purple |
| chr1:84230139 | 1   | 84.23014 | 0.022752797 | Credible Set | purple |
| chr1:84230140 | 1   | 84.23014 | 0.021803722 | Credible Set | purple |
| chr1:84230230 | 1   | 84.23023 | 0.006299284 | Credible Set | purple |
| chr1:84230232 | 1   | 84.23023 | 0.007095944 | Credible Set | purple |
| chr1:84230233 | 1   | 84.23023 | 0.008010994 | Credible Set | purple |
| chr1:84230245 | 1   | 84.23024 | 0.008408622 | Credible Set | purple |
| chr1:84230255 | 1   | 84.23025 | 0.008446651 | Credible Set | purple |
| chr1:84283668 | 1   | 84.28367 | 0.026427192 | Credible Set | purple |
| chr1:84311316 | 1   | 84.31132 | 0.026206138 | Credible Set | purple |
| chr1:84311384 | 1   | 84.31138 | 0.025543727 | Credible Set | purple |
| chr1:84340686 | 1   | 84.34069 | 0.026531472 | Credible Set | purple |
| chr1:84352584 | 1   | 84.35258 | 0.026185263 | Credible Set | purple |
| chr1:84385821 | 1   | 84.38582 | 0.064085697 | Credible Set | purple |
| chr1:84413844 | 1   | 84.41384 | 0.030348182 | Credible Set | purple |
| chr1:84425660 | 1   | 84.42566 | 0.023820802 | Credible Set | purple |
| chr1:84628469 | 1   | 84.62847 | 0.016422607 | Credible Set | purple |
| chr1:84628475 | 1   | 84.62847 | 0.016298809 | Credible Set | purple |
| chr1:84629053 | 1   | 84.62905 | 0.021283367 | Credible Set | purple |
| chr1:84663039 | 1   | 84.66304 | 0.018681984 | Credible Set | purple |
| chr1:84663099 | 1   | 84.66310 | 0.021628409 | Credible Set | purple |
| chr1:84944754 | 1   | 84.94475 | 0.028599845 | Credible Set | purple |

F34 GBS, heart\_tibia.gs\_wt

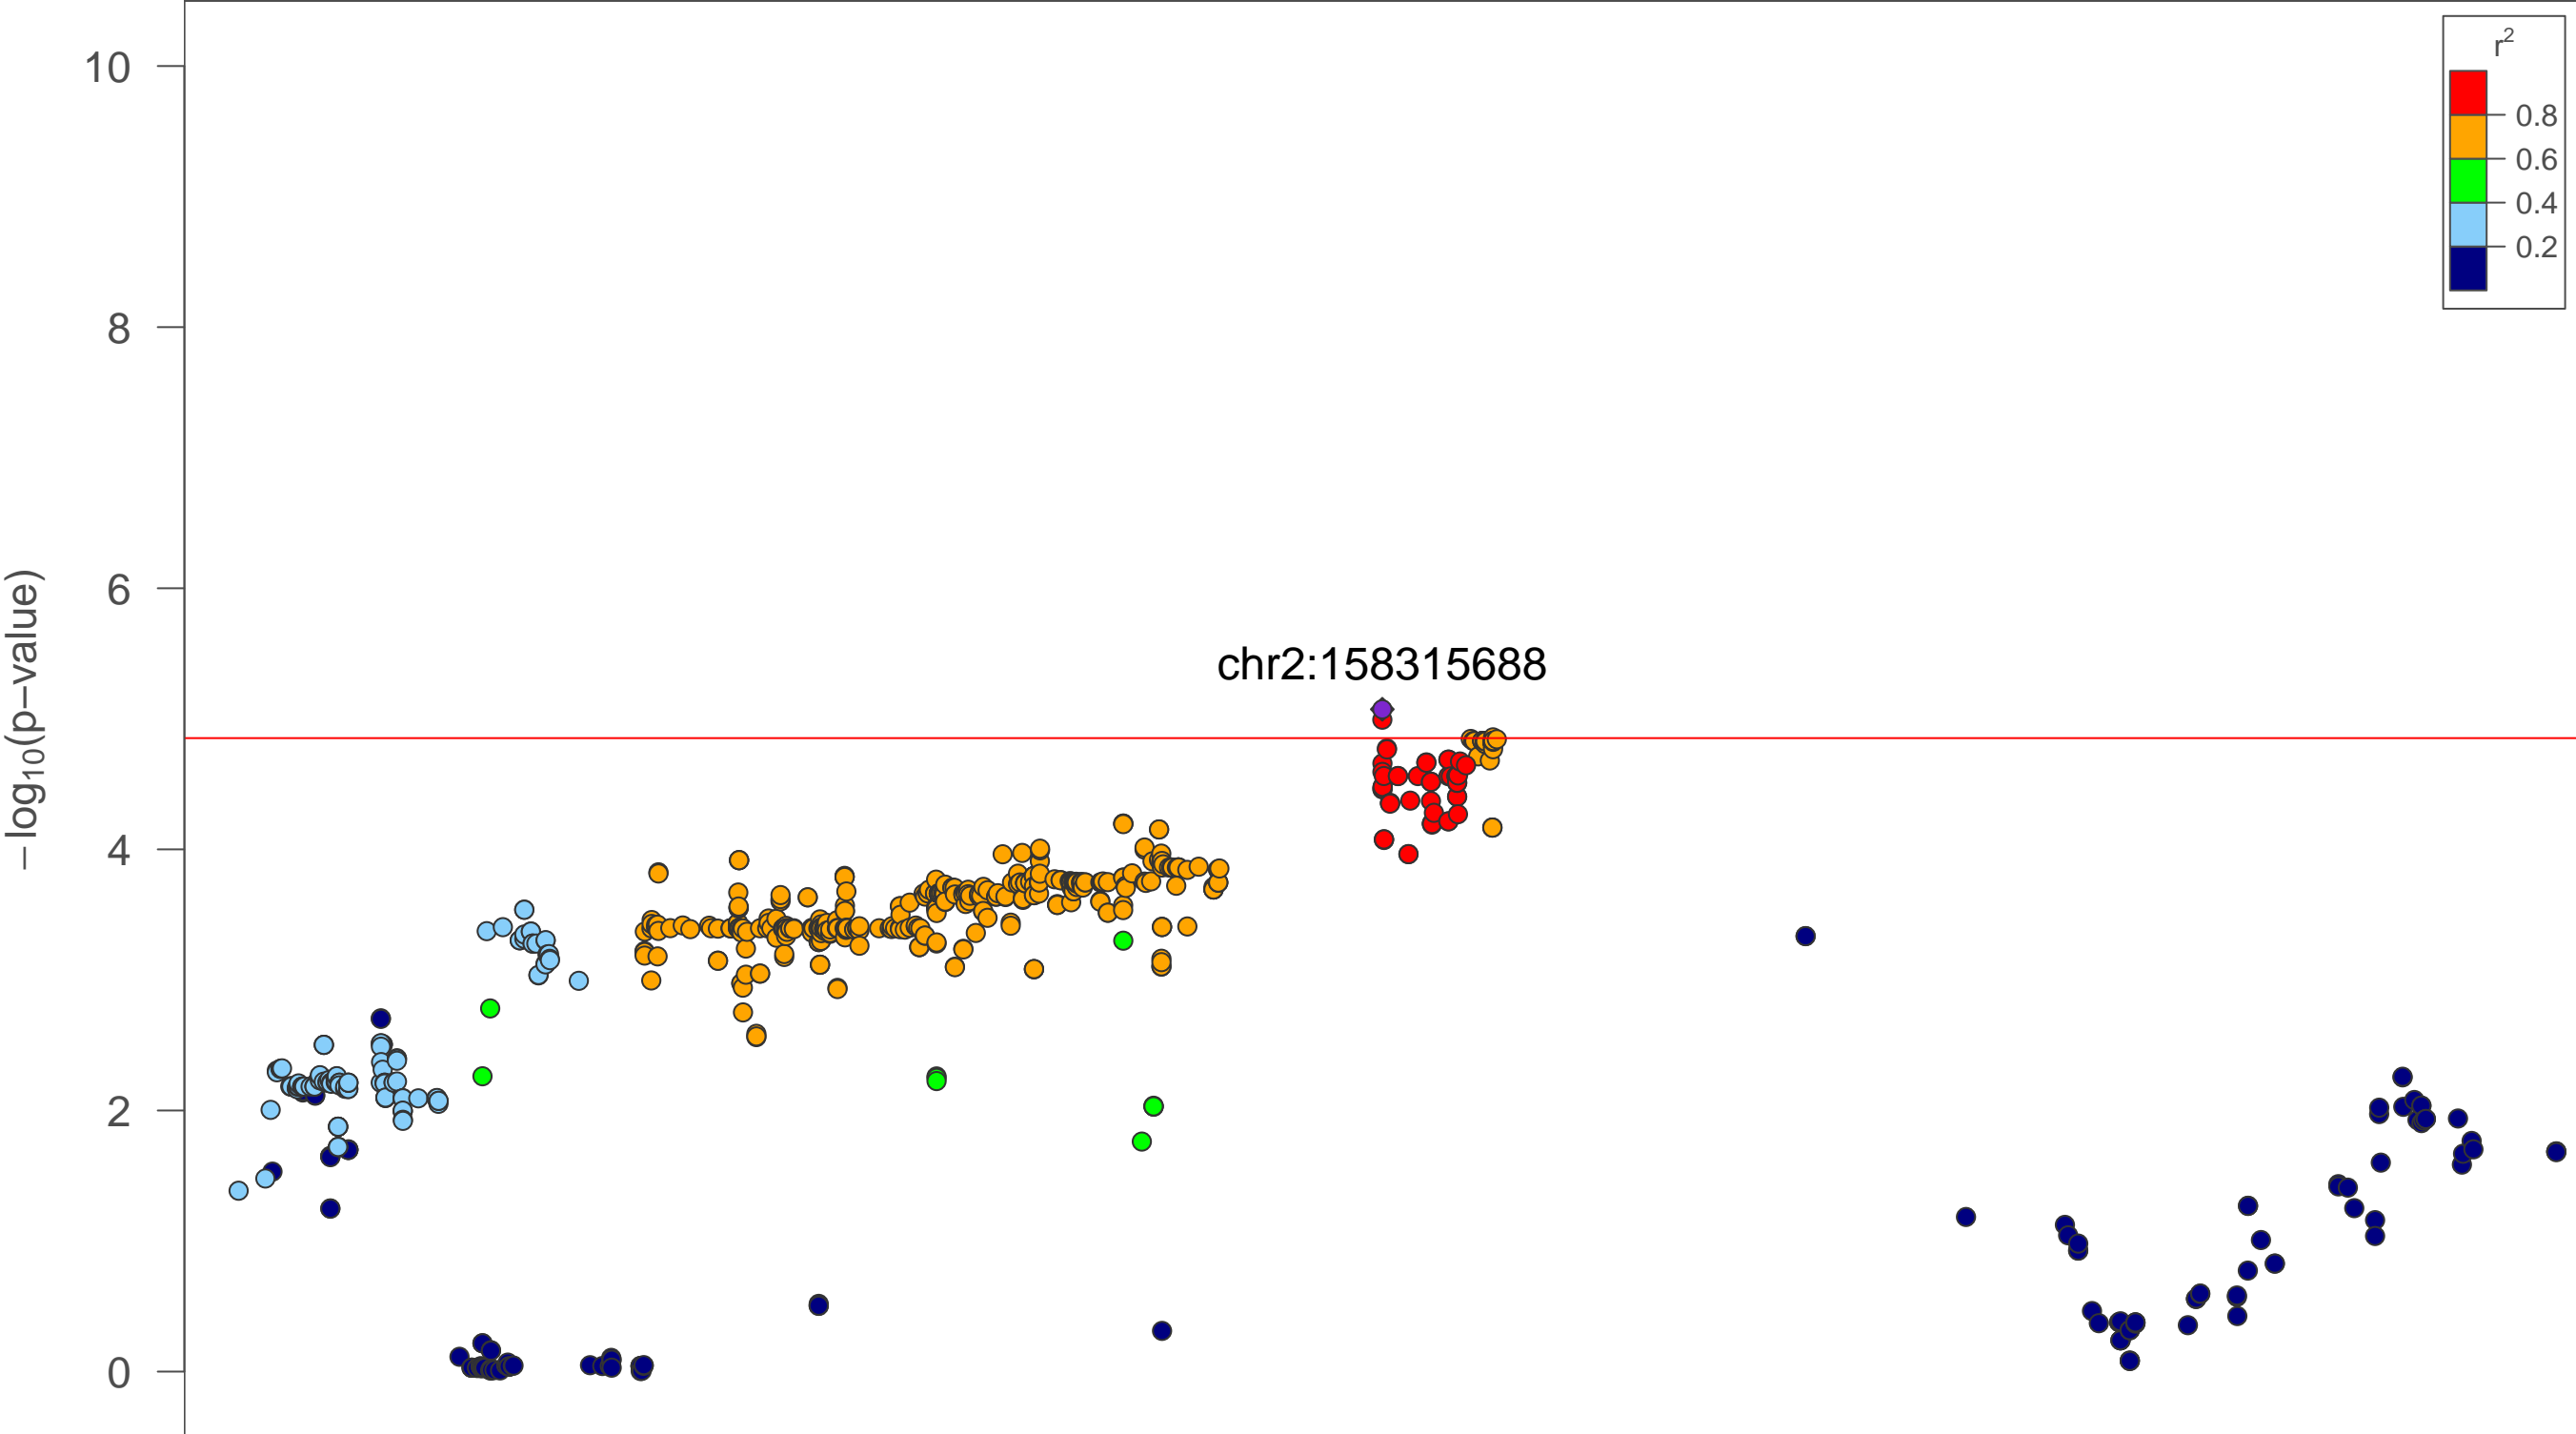

Credible Set

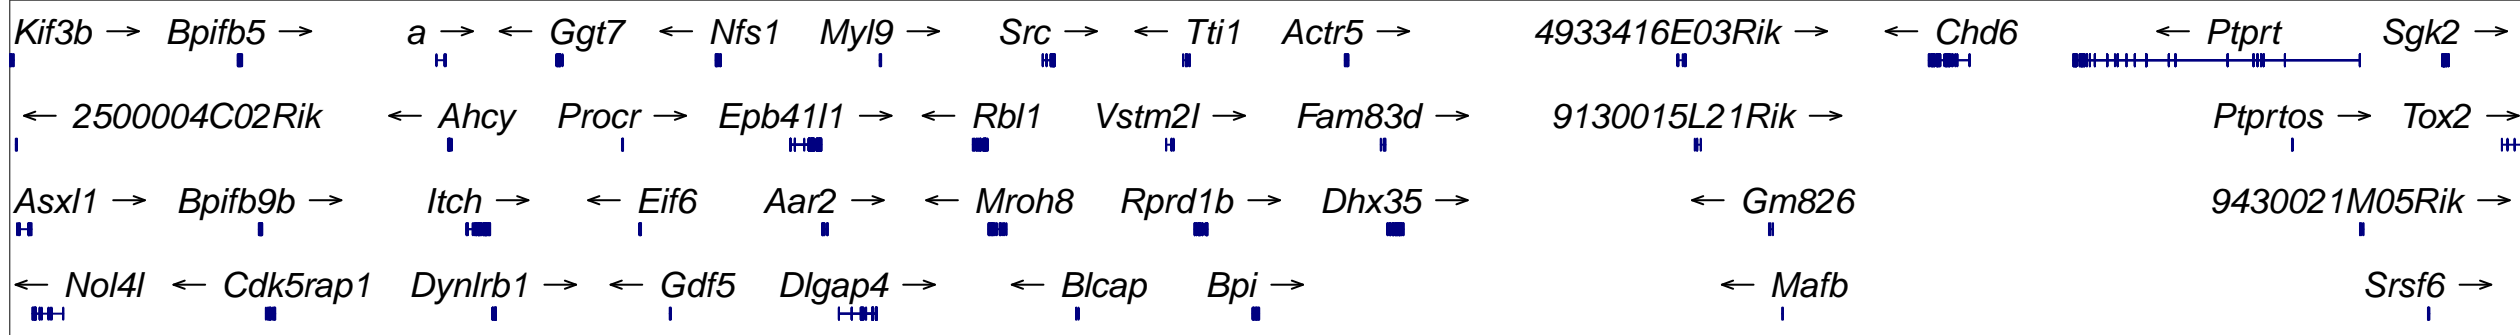

98 genes  
omitted



date: Thu Oct 25 17:14:57 2018

build: F34GBS

display range: chr2:153315688–163315688 [153315688–163315688]

hilite range: 0 – 0 [ 0 – 0 ]

reference SNP: chr2:158315688

number of SNPs plotted: 737

min P-value: 8.45E–6 [chr2:158315688]

max P-value: 9.91E–1 [chr2:155220725]

omitted Genes: Commd7, Dnmt3b, Mapre1

omitted Genes: Efcab8, Sun5, Bpifb2

omitted Genes: Bpifb6, Bpifb3, Bpifb4

omitted Genes: Bpifa6, Bpifa2, Bpifa3

omitted Genes: Bpifa1, Bpifa5, Bpifb1

omitted Genes: Bpifb9a, Snta1, Cbfa2t2

omitted Genes: Necab3, 1700003F12Rik, Actl10

omitted Genes: E2f1, Pxmp4, Zfp341

omitted Genes: Chmp4b, Raly, Eif2s2

omitted Genes: 2310005A03Rik, Map1lc3a, Pigu

omitted Genes: Mir695, Trp53inp2, Ncoa6

omitted Genes: Acss2, Acss2os, Gss

omitted Genes: Myh7b, Mir499, Trpc4ap

omitted Genes: Edem2, Mmp24, BC029722

omitted Genes: Fam83c, Uqcc1, Cep250

omitted Genes: 6430550D23Rik, Ergic3, Fer114

omitted Genes: Spag4, Cpne1, Rbm12

omitted Genes: Romo1, Rbm39, Phf20

omitted Genes: Scand1, Cnbd2, 2900097C17Rik

omitted Genes: Gm14169, 4930405A21Rik, Tgif2

omitted Genes: 5430405H02Rik, 1110008F13Rik, Sla2

omitted Genes: Ndr3, Dsn1, Soga1

omitted Genes: Tldc2, Samhd1, Rpn2

omitted Genes: Ghrh, Manbal, Nnat

omitted Genes: Ctnnb1, 2010009K17Rik, Tgm2

omitted Genes: D630003M21Rik, 1700060C20Rik, Mir7685

omitted Genes: Lbp, Snhg17, Snhg11

omitted Genes: Ralgapb, Adig, Arhgap40

omitted Genes: Gm14204, Slc32a1, Mir3474

omitted Genes: Ppp1r16b, Top1, Plcg1

omitted Genes: Zhx3, Lpin3, Emilin3

omitted Genes: L3mbtl1, Ifi52, Mybl2

Make more plots at <http://csg.sph.umich.edu/locuszoom/>

## Fine-mapping Regions

| snp            | chr | pos (Mb) | pp          | group        | color  |
|----------------|-----|----------|-------------|--------------|--------|
| chr2:158315688 | 2   | 158.3157 | 0.067553513 | Credible Set | purple |
| chr2:158315756 | 2   | 158.3158 | 0.056710404 | Credible Set | purple |
| chr2:158316223 | 2   | 158.3162 | 0.027192220 | Credible Set | purple |
| chr2:158316249 | 2   | 158.3162 | 0.023575944 | Credible Set | purple |
| chr2:158316290 | 2   | 158.3163 | 0.017644086 | Credible Set | purple |
| chr2:158316307 | 2   | 158.3163 | 0.017640453 | Credible Set | purple |
| chr2:158317181 | 2   | 158.3172 | 0.018433721 | Credible Set | purple |
| chr2:158317182 | 2   | 158.3172 | 0.018162421 | Credible Set | purple |
| chr2:158317215 | 2   | 158.3172 | 0.018356902 | Credible Set | purple |
| chr2:158322238 | 2   | 158.3222 | 0.022009191 | Credible Set | purple |
| chr2:158322761 | 2   | 158.3228 | 0.007553278 | Credible Set | purple |
| chr2:158322795 | 2   | 158.3228 | 0.007645301 | Credible Set | purple |
| chr2:158322809 | 2   | 158.3228 | 0.007625461 | Credible Set | purple |
| chr2:158334991 | 2   | 158.3350 | 0.034966947 | Credible Set | purple |
| chr2:158335036 | 2   | 158.3350 | 0.034419970 | Credible Set | purple |
| chr2:158348022 | 2   | 158.3480 | 0.014038046 | Credible Set | purple |
| chr2:158348028 | 2   | 158.3480 | 0.013985272 | Credible Set | purple |
| chr2:158348031 | 2   | 158.3480 | 0.013855400 | Credible Set | purple |
| chr2:158380870 | 2   | 158.3809 | 0.022022804 | Credible Set | purple |
| chr2:158380953 | 2   | 158.3810 | 0.021986754 | Credible Set | purple |
| chr2:158424885 | 2   | 158.4249 | 0.005965392 | Credible Set | purple |
| chr2:158432408 | 2   | 158.4324 | 0.014573331 | Credible Set | purple |
| chr2:158463993 | 2   | 158.4640 | 0.021983874 | Credible Set | purple |
| chr2:158499568 | 2   | 158.4996 | 0.027661448 | Credible Set | purple |
| chr2:158499611 | 2   | 158.4996 | 0.027510236 | Credible Set | purple |
| chr2:158518637 | 2   | 158.5186 | 0.014467513 | Credible Set | purple |
| chr2:158518964 | 2   | 158.5190 | 0.019963248 | Credible Set | purple |
| chr2:158519003 | 2   | 158.5190 | 0.019963248 | Credible Set | purple |
| chr2:158523085 | 2   | 158.5231 | 0.010001658 | Credible Set | purple |
| chr2:158523125 | 2   | 158.5231 | 0.009970331 | Credible Set | purple |
| chr2:158523133 | 2   | 158.5231 | 0.009764408 | Credible Set | purple |
| chr2:158523135 | 2   | 158.5231 | 0.009871917 | Credible Set | purple |
| chr2:158531021 | 2   | 158.5310 | 0.011888153 | Credible Set | purple |
| chr2:158591403 | 2   | 158.5914 | 0.021944319 | Credible Set | purple |
| chr2:158591550 | 2   | 158.5916 | 0.010313254 | Credible Set | purple |
| chr2:158591613 | 2   | 158.5916 | 0.010307309 | Credible Set | purple |

Fine-mapping Regions

| snp            | chr | pos (Mb) | pp         | group        | color  |
|----------------|-----|----------|------------|--------------|--------|
| chr2:158591734 | 2   | 158.5917 | 0.02899447 | Credible Set | purple |
| chr2:158591782 | 2   | 158.5918 | 0.02896804 | Credible Set | purple |
| chr2:158601272 | 2   | 158.6013 | 0.02186655 | Credible Set | purple |
| chr2:158625324 | 2   | 158.6253 | 0.02200009 | Credible Set | purple |
| chr2:158625366 | 2   | 158.6254 | 0.02200009 | Credible Set | purple |
| chr2:158627877 | 2   | 158.6279 | 0.01556789 | Credible Set | purple |
| chr2:158627920 | 2   | 158.6279 | 0.01556789 | Credible Set | purple |
| chr2:158628144 | 2   | 158.6281 | 0.01959211 | Credible Set | purple |
| chr2:158628165 | 2   | 158.6282 | 0.01967698 | Credible Set | purple |
| chr2:158631398 | 2   | 158.6314 | 0.01160882 | Credible Set | purple |
| chr2:158631624 | 2   | 158.6316 | 0.02223644 | Credible Set | purple |
| chr2:158640014 | 2   | 158.6400 | 0.02809391 | Credible Set | purple |
| chr2:158665126 | 2   | 158.6651 | 0.02633361 | Credible Set | purple |

# F34 GBS, heart weight to tibia length ratio

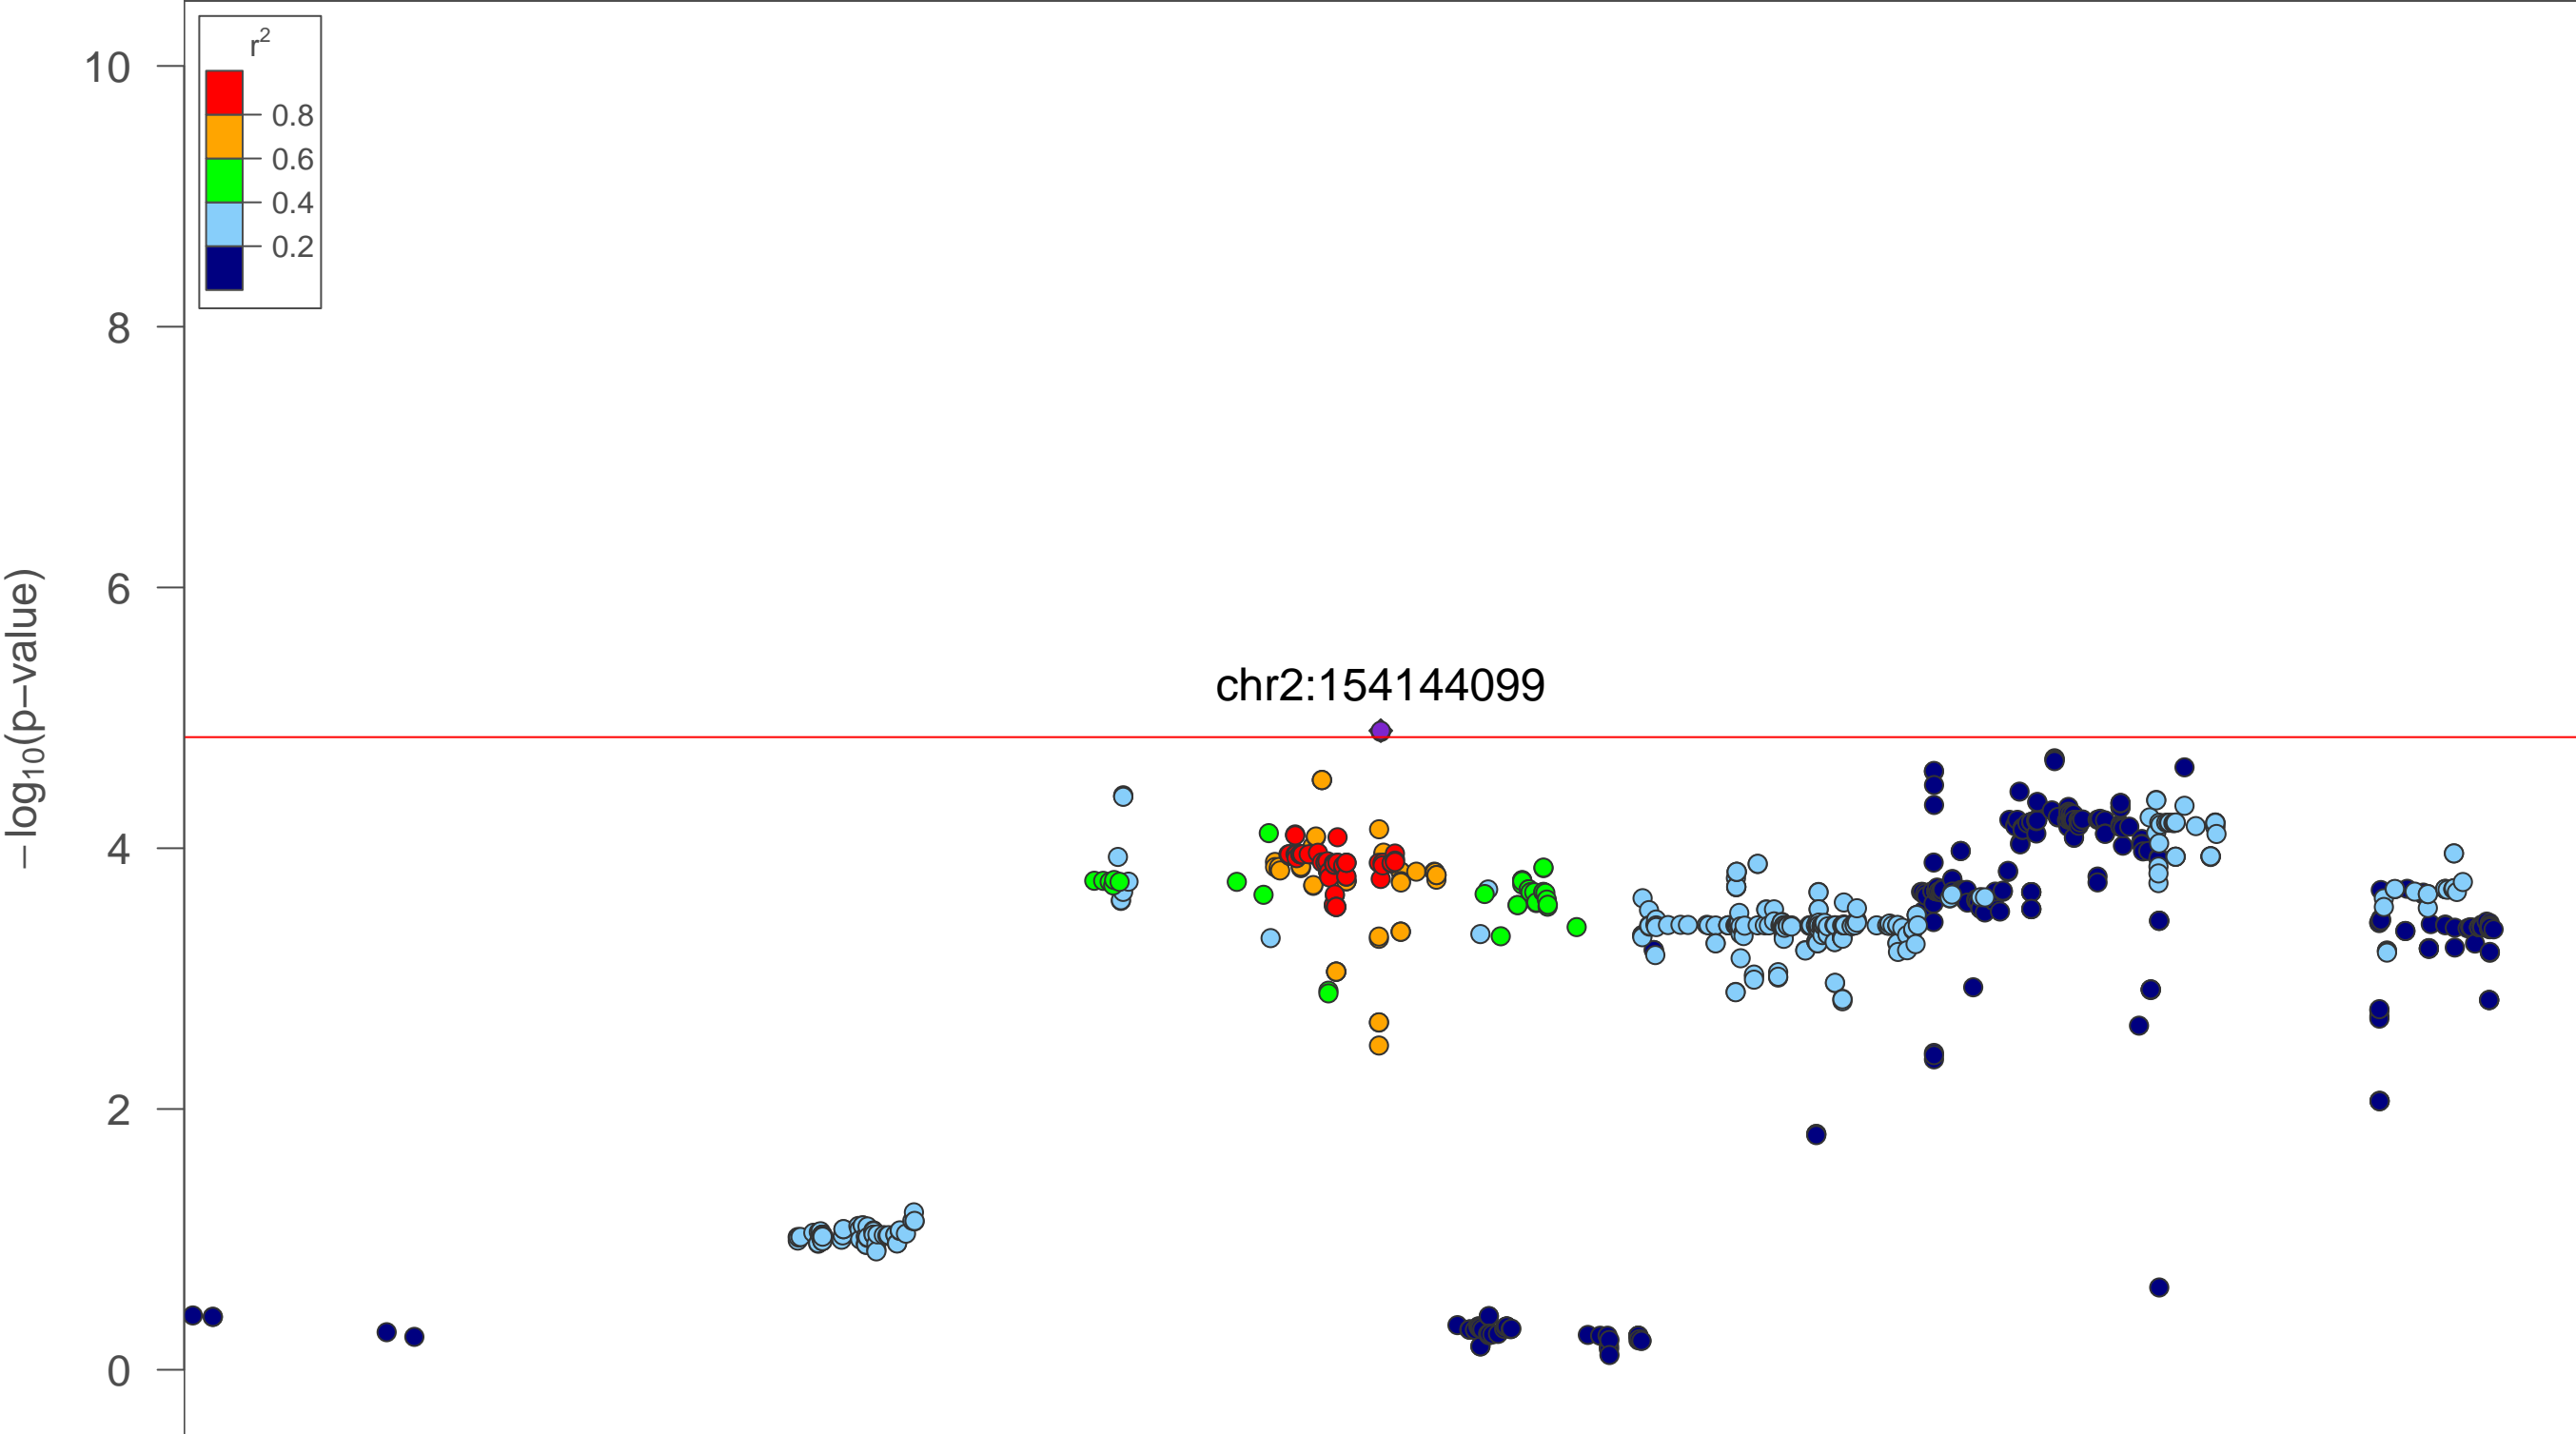

Credible Set

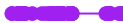

*Cst10* → *Zfp937* → *Gins1* → ← *Snph* ← *Rbck1* *Ttll9* → *Dnmt3b* → ← *Snta1* *a* → ← *Ggt7* ← *Nfs1* *Myl9* → *Src* → ← *Tti1* *Actr5* →  
*Syndig1* → ← *Vsx1* *Nsfl1c* → *Tbc1d20* → *Xkr7* → *Mapre1* → ← *Necab3* ← *Pigu* ← *Gdf5* *Aar2* → ← *Rbl1* *Vstm2l* → *Fam83d* →  
← *Zfp120* *Pygb* → *Fkbp1a* → ← *Trib3* ← *Pdrg1* *Efcab8* → *Actl10* → *Itch* → *Procr* → *Epb41l1* → ← *Mroh8* *Rprd1b* → *Dhx35* →  
*Gm14139* → ← *Ninl* ← *Rad21l* ← *Nrsn2* *Ccm2l* → ← *Sun5* ← *E2f1* *Dynlrb1* → *Ergic3* → *Tgif2* → ← *Blcap* *Bpi* →

145 genes  
omitted

Position on chr2 (Mb)

date: Thu Oct 25 17:15:09 2018

build: F34GBS

display range: chr2:149144099–159144099 [149144099–159144099]

hilite range: 0 – 0 [ 0 – 0 ]

reference SNP: chr2:154144099

number of SNPs plotted: 751

min P-value: 1.25E–5 [chr2:154144099]

max P-value: 7.71E–1 [chr2:155099522]

omitted Genes: Gm14124, 3300002I08Rik, Zfp442

omitted Genes: Zfp345, Cst7, Apmap

omitted Genes: Acss1, E130215H24Rik, Entpd6

omitted Genes: Abhd12, Nanp, Gm14151

omitted Genes: 4930442J19Rik, LOC100125594, 4921509C19Rik

omitted Genes: Sdcbp2, Tmem74b, Psmf1

omitted Genes: Rspo4, Angpt4, Mir1953

omitted Genes: Fam110a, Slc52a3, Scrt2

omitted Genes: Srxn1, Tcf15, Csnk2a1

omitted Genes: Gm14164, Sox12, Zcchc3

omitted Genes: 6820408C15Rik, Defb23, Defb20

omitted Genes: Defb22, Defb26, Defb28

omitted Genes: Defb29, Defb21, Defb19

omitted Genes: Defb45, Defb36, Defb25

omitted Genes: Rem1, H13, Mcts2

omitted Genes: Id1, Cox4i2, Bcl2l1

omitted Genes: Tpx2, Mir5622, Mylk2

omitted Genes: Foxs1, Dusp15, Hck

omitted Genes: Tm9sf4, Tspyl3, Plagl2

omitted Genes: Pofut1, Kif3b, 2500004C02Rik

omitted Genes: Asxl1, Nol4l, Commd7

omitted Genes: Bpifb2, Bpifb6, Bpifb3

omitted Genes: Bpifb4, Bpifa6, Bpifa2

omitted Genes: Bpifa3, Bpifa1, Bpifa5

omitted Genes: Bpifb1, Bpifb5, Bpifb9a

omitted Genes: Bpifb9b, Cdk5rap1, Cbfa2t2

omitted Genes: 1700003F12Rik, Pxmp4, Zfp341

omitted Genes: Chmp4b, Raly, Eif2s2

omitted Genes: Ahcy, 2310005A03Rik, Map1lc3a

omitted Genes: Mir695, Trp53inp2, Ncoa6

omitted Genes: Acss2, Acss2os, Gss

omitted Genes: Myh7b, Mir499, Trnc4ap

Make more plots at <http://csg.sph.umich.edu/locuszoom/>

## Fine-mapping Regions

| snp            | chr | pos (Mb) | pp          | group        | color  |
|----------------|-----|----------|-------------|--------------|--------|
| chr2:153762531 | 2   | 153.7625 | 0.014340562 | Credible Set | purple |
| chr2:153762617 | 2   | 153.7626 | 0.014736630 | Credible Set | purple |
| chr2:153786486 | 2   | 153.7865 | 0.020275435 | Credible Set | purple |
| chr2:153786488 | 2   | 153.7865 | 0.020518988 | Credible Set | purple |
| chr2:153786535 | 2   | 153.7865 | 0.020202108 | Credible Set | purple |
| chr2:153787701 | 2   | 153.7877 | 0.014736630 | Credible Set | purple |
| chr2:153792798 | 2   | 153.7928 | 0.014736630 | Credible Set | purple |
| chr2:153792843 | 2   | 153.7928 | 0.013812327 | Credible Set | purple |
| chr2:153807997 | 2   | 153.8080 | 0.014736630 | Credible Set | purple |
| chr2:153808035 | 2   | 153.8080 | 0.014736630 | Credible Set | purple |
| chr2:153810771 | 2   | 153.8108 | 0.014719244 | Credible Set | purple |
| chr2:153816574 | 2   | 153.8166 | 0.014736630 | Credible Set | purple |
| chr2:153843032 | 2   | 153.8430 | 0.014736630 | Credible Set | purple |
| chr2:153881660 | 2   | 153.8817 | 0.015113659 | Credible Set | purple |
| chr2:153898207 | 2   | 153.8982 | 0.012900073 | Credible Set | purple |
| chr2:153913470 | 2   | 153.9135 | 0.012865507 | Credible Set | purple |
| chr2:153913717 | 2   | 153.9137 | 0.012852460 | Credible Set | purple |
| chr2:153921306 | 2   | 153.9213 | 0.013110608 | Credible Set | purple |
| chr2:153928744 | 2   | 153.9287 | 0.011050302 | Credible Set | purple |
| chr2:153929140 | 2   | 153.9291 | 0.010017034 | Credible Set | purple |
| chr2:153947803 | 2   | 153.9478 | 0.012681654 | Credible Set | purple |
| chr2:153947918 | 2   | 153.9479 | 0.006271755 | Credible Set | purple |
| chr2:153947973 | 2   | 153.9480 | 0.006400102 | Credible Set | purple |
| chr2:153950405 | 2   | 153.9504 | 0.012336003 | Credible Set | purple |
| chr2:153950802 | 2   | 153.9508 | 0.012424706 | Credible Set | purple |
| chr2:153952188 | 2   | 153.9522 | 0.007447154 | Credible Set | purple |
| chr2:153952255 | 2   | 153.9523 | 0.007561241 | Credible Set | purple |
| chr2:153957833 | 2   | 153.9578 | 0.006147223 | Credible Set | purple |
| chr2:153957885 | 2   | 153.9579 | 0.006147223 | Credible Set | purple |
| chr2:153957890 | 2   | 153.9579 | 0.006147223 | Credible Set | purple |
| chr2:153963486 | 2   | 153.9635 | 0.012786933 | Credible Set | purple |
| chr2:153963504 | 2   | 153.9635 | 0.012786933 | Credible Set | purple |
| chr2:153963562 | 2   | 153.9636 | 0.019575345 | Credible Set | purple |
| chr2:153987087 | 2   | 153.9871 | 0.011947686 | Credible Set | purple |
| chr2:153987540 | 2   | 153.9875 | 0.012207191 | Credible Set | purple |
| chr2:154000310 | 2   | 154.0003 | 0.010154622 | Credible Set | purple |

## Fine-mapping Regions

| snp            | chr | pos (Mb) | pp          | group        | color  |
|----------------|-----|----------|-------------|--------------|--------|
| chr2:154000346 | 2   | 154.0003 | 0.010182767 | Credible Set | purple |
| chr2:154000704 | 2   | 154.0007 | 0.012786933 | Credible Set | purple |
| chr2:154000755 | 2   | 154.0008 | 0.012786933 | Credible Set | purple |
| chr2:154000791 | 2   | 154.0008 | 0.012786933 | Credible Set | purple |
| chr2:154135816 | 2   | 154.1358 | 0.012786933 | Credible Set | purple |
| chr2:154143827 | 2   | 154.1438 | 0.009769867 | Credible Set | purple |
| chr2:154144099 | 2   | 154.1441 | 0.116950121 | Credible Set | purple |
| chr2:154144100 | 2   | 154.1441 | 0.115191612 | Credible Set | purple |
| chr2:154144142 | 2   | 154.1441 | 0.114572675 | Credible Set | purple |
| chr2:154152208 | 2   | 154.1522 | 0.012786933 | Credible Set | purple |
| chr2:154152238 | 2   | 154.1522 | 0.012786933 | Credible Set | purple |
| chr2:154152320 | 2   | 154.1523 | 0.012249480 | Credible Set | purple |
| chr2:154189385 | 2   | 154.1894 | 0.012628698 | Credible Set | purple |
| chr2:154189574 | 2   | 154.1896 | 0.012778016 | Credible Set | purple |
| chr2:154203292 | 2   | 154.2033 | 0.013706541 | Credible Set | purple |
| chr2:154203302 | 2   | 154.2033 | 0.014920169 | Credible Set | purple |
| chr2:154203329 | 2   | 154.2033 | 0.013262199 | Credible Set | purple |
| chr2:154203418 | 2   | 154.2034 | 0.012961320 | Credible Set | purple |

F34 GBS, iron content in liver

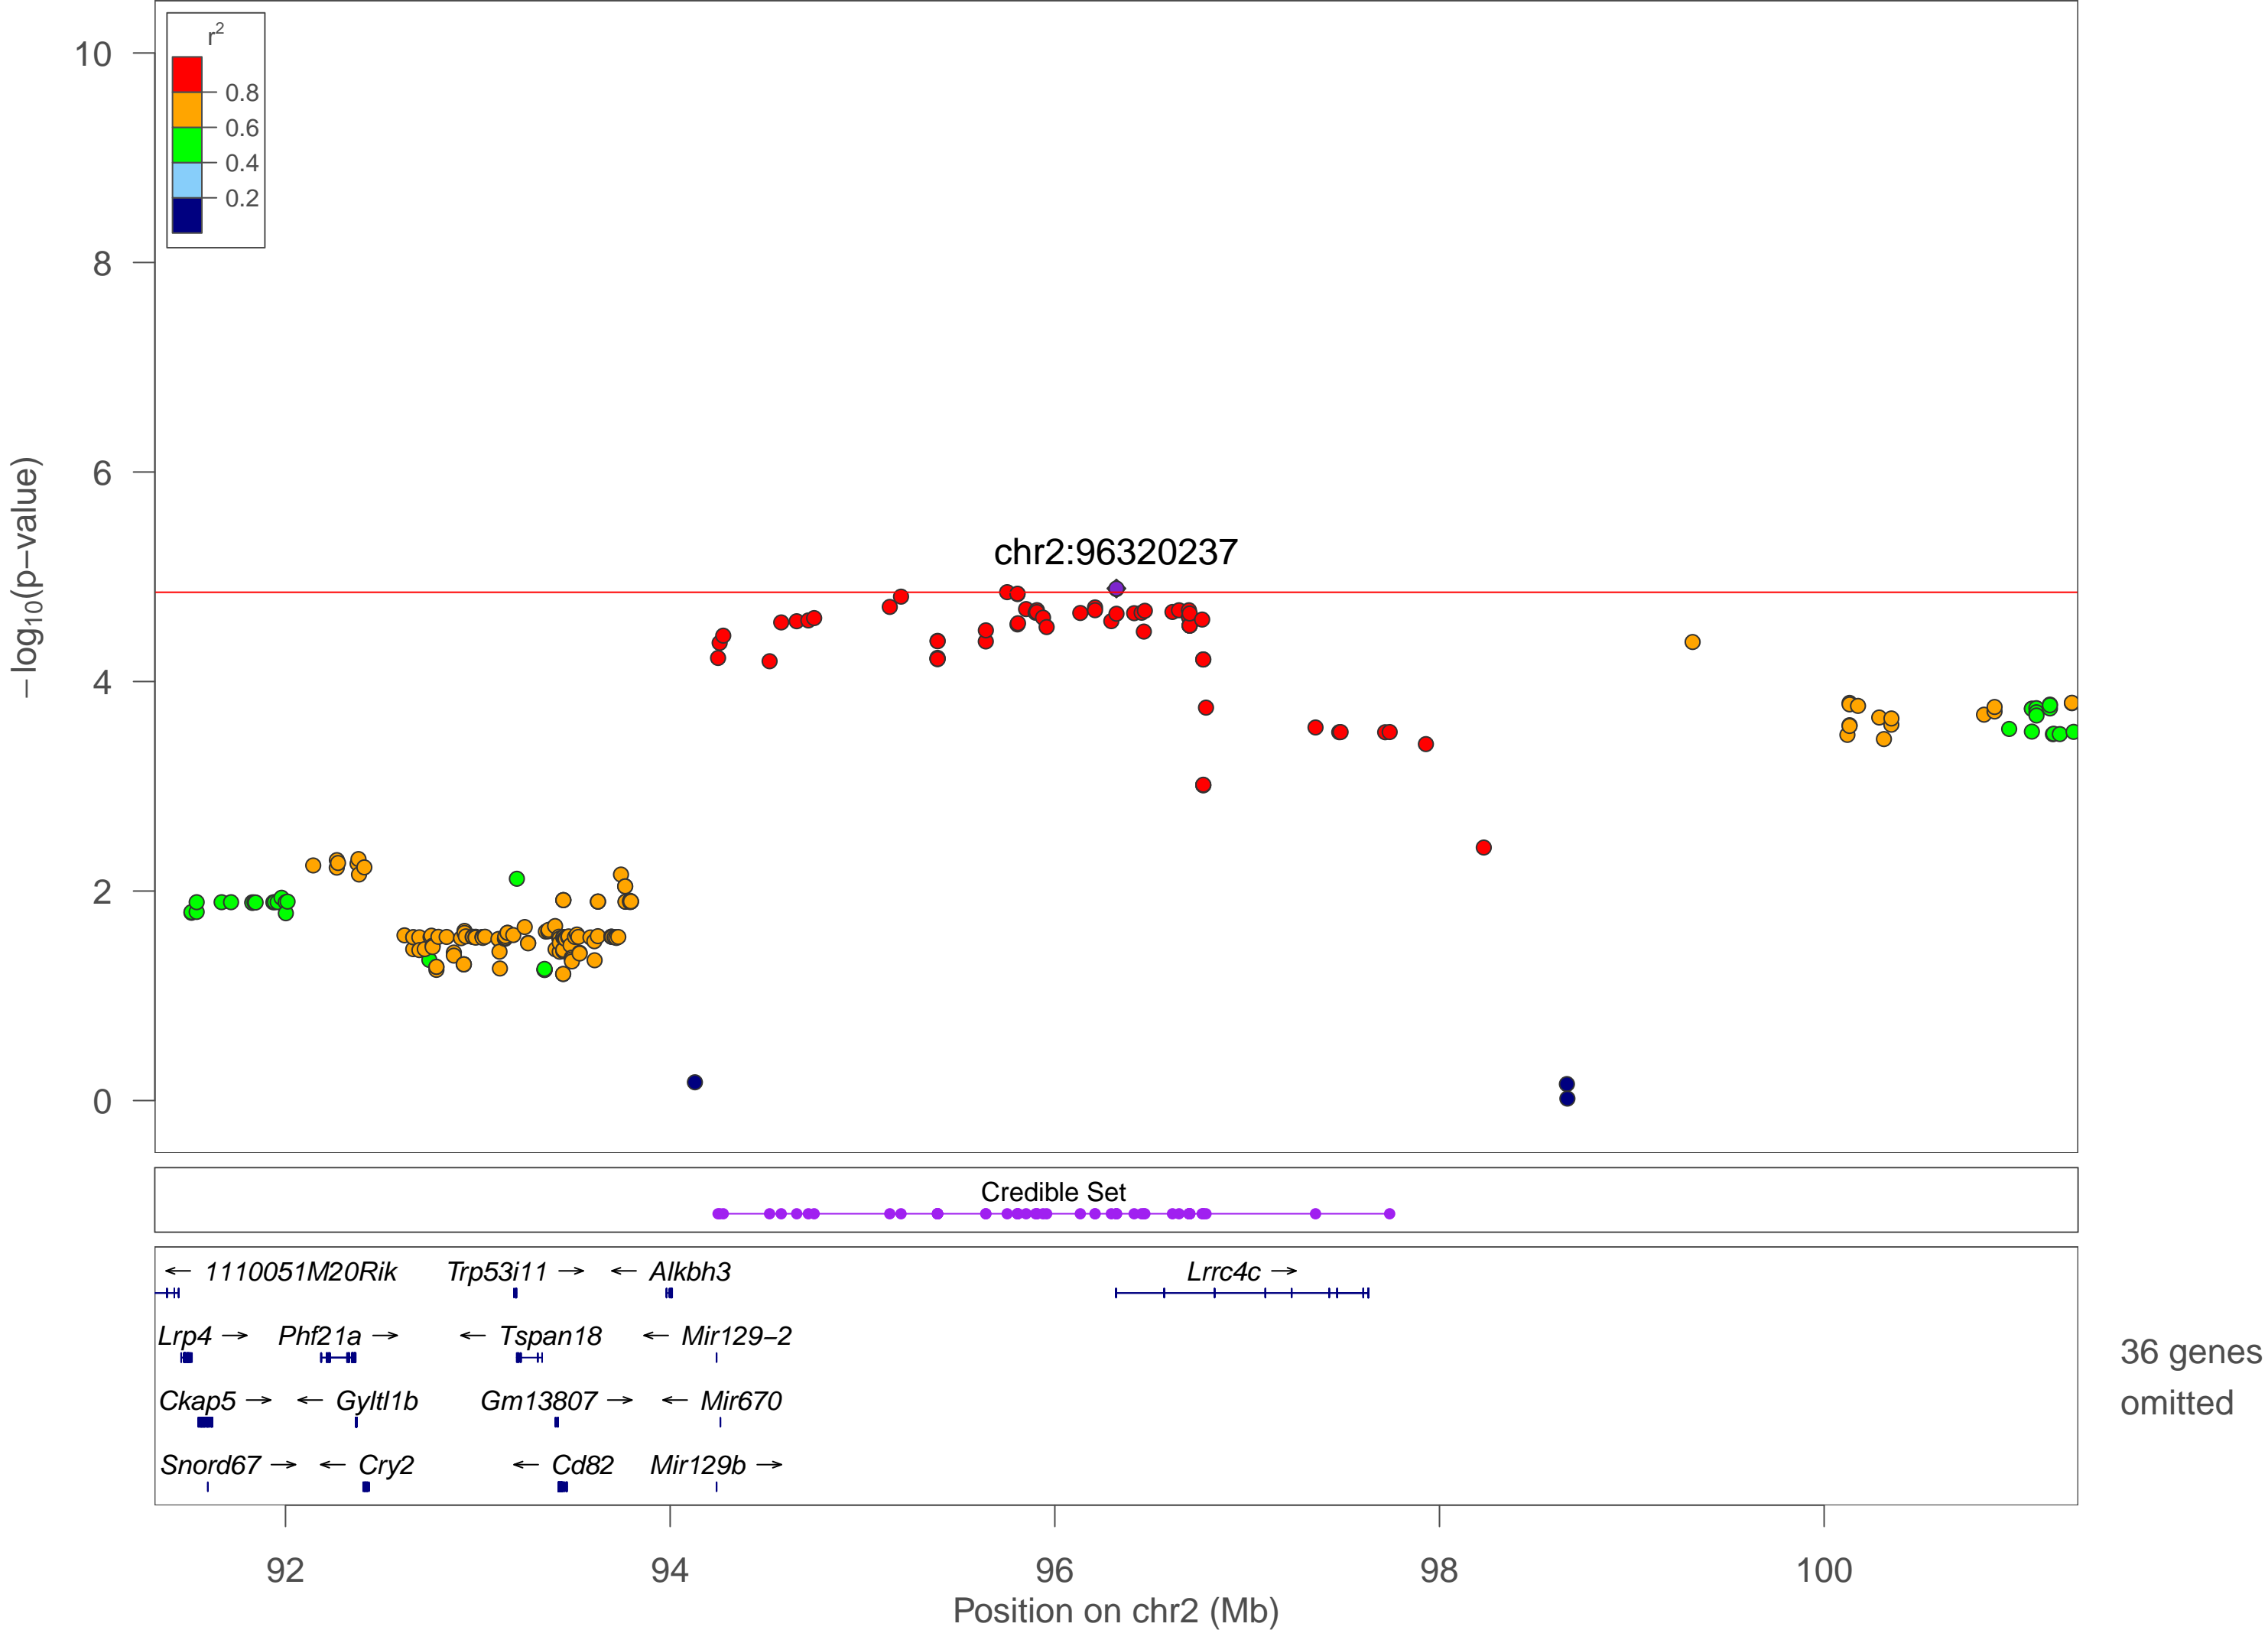



date: Thu Oct 25 17:15:50 2018

build: F34GBS

display range: chr2:91320237–101320237 [91320237–101320237]

hilite range: 0 – 0 [ 0 – 0 ]

reference SNP: chr2:96320237

number of SNPs plotted: 236

min P-value: 1.29E–5 [chr2:96320237]

max P-value: 9.58E–1 [chr2:98665093]

omitted Genes: F2, Zfp408, Arhgap1

omitted Genes: Atg13, Harbi1, Ambra1

omitted Genes: Chrm4, Mdk, Dgkz

omitted Genes: Mir6999, Creb3l1, Mir1955

omitted Genes: Pex16, 1700029I15Rik, Mapk8ip1

omitted Genes: Mir7000, D930015M05Rik, Slc35c1

omitted Genes: Mir7221, Mir7222, Chst1

omitted Genes: Syt13, Prdm11, 4631405J19Rik

omitted Genes: Mir7001, Gm10804, Alx4

omitted Genes: Ext2, Accs, Accsl

omitted Genes: Gm13889, Alkbh3os1, Hsd17b12

omitted Genes: Ttc17, 2810002D19Rik, Api5

## Fine-mapping Regions

| snp           | chr | pos (Mb) | pp          | group        | color  |
|---------------|-----|----------|-------------|--------------|--------|
| chr2:94249122 | 2   | 94.24912 | 0.008286008 | Credible Set | purple |
| chr2:94257379 | 2   | 94.25738 | 0.011351696 | Credible Set | purple |
| chr2:94276010 | 2   | 94.27601 | 0.013199881 | Credible Set | purple |
| chr2:94516977 | 2   | 94.51698 | 0.007744163 | Credible Set | purple |
| chr2:94577500 | 2   | 94.57750 | 0.017396457 | Credible Set | purple |
| chr2:94657941 | 2   | 94.65794 | 0.017833975 | Credible Set | purple |
| chr2:94718556 | 2   | 94.71856 | 0.018139036 | Credible Set | purple |
| chr2:94748712 | 2   | 94.74871 | 0.019053454 | Credible Set | purple |
| chr2:95141904 | 2   | 95.14190 | 0.024067265 | Credible Set | purple |
| chr2:95200398 | 2   | 95.20040 | 0.029835579 | Credible Set | purple |
| chr2:95390243 | 2   | 95.39024 | 0.008220943 | Credible Set | purple |
| chr2:95390247 | 2   | 95.39025 | 0.008090195 | Credible Set | purple |
| chr2:95390277 | 2   | 95.39028 | 0.008301131 | Credible Set | purple |
| chr2:95390284 | 2   | 95.39028 | 0.008117626 | Credible Set | purple |
| chr2:95390546 | 2   | 95.39055 | 0.011839594 | Credible Set | purple |
| chr2:95390592 | 2   | 95.39059 | 0.011751530 | Credible Set | purple |
| chr2:95641124 | 2   | 95.64112 | 0.011697477 | Credible Set | purple |
| chr2:95641477 | 2   | 95.64148 | 0.014740073 | Credible Set | purple |
| chr2:95752277 | 2   | 95.75228 | 0.032769533 | Credible Set | purple |
| chr2:95805867 | 2   | 95.80587 | 0.016687093 | Credible Set | purple |
| chr2:95806028 | 2   | 95.80603 | 0.031502905 | Credible Set | purple |
| chr2:95806038 | 2   | 95.80604 | 0.031743782 | Credible Set | purple |
| chr2:95808603 | 2   | 95.80860 | 0.017109349 | Credible Set | purple |
| chr2:95850674 | 2   | 95.85067 | 0.022997969 | Credible Set | purple |
| chr2:95900229 | 2   | 95.90023 | 0.021299943 | Credible Set | purple |
| chr2:95906738 | 2   | 95.90674 | 0.022491984 | Credible Set | purple |
| chr2:95906783 | 2   | 95.90678 | 0.021603954 | Credible Set | purple |
| chr2:95938782 | 2   | 95.93878 | 0.019239869 | Credible Set | purple |
| chr2:95957448 | 2   | 95.95745 | 0.015789929 | Credible Set | purple |
| chr2:96132587 | 2   | 96.13259 | 0.021193097 | Credible Set | purple |
| chr2:96209134 | 2   | 96.20913 | 0.023810661 | Credible Set | purple |
| chr2:96209157 | 2   | 96.20916 | 0.022461346 | Credible Set | purple |
| chr2:96293855 | 2   | 96.29385 | 0.017860711 | Credible Set | purple |
| chr2:96320222 | 2   | 96.32022 | 0.035016259 | Credible Set | purple |
| chr2:96320237 | 2   | 96.32024 | 0.035385938 | Credible Set | purple |
| chr2:96320641 | 2   | 96.32064 | 0.020864650 | Credible Set | purple |

Fine-mapping Regions

| snp           | chr | pos (Mb) | pp          | group        | color  |
|---------------|-----|----------|-------------|--------------|--------|
| chr2:96412425 | 2   | 96.41242 | 0.021107363 | Credible Set | purple |
| chr2:96451438 | 2   | 96.45144 | 0.021299943 | Credible Set | purple |
| chr2:96462914 | 2   | 96.46291 | 0.014371330 | Credible Set | purple |
| chr2:96468064 | 2   | 96.46806 | 0.022194194 | Credible Set | purple |
| chr2:96611762 | 2   | 96.61176 | 0.021647155 | Credible Set | purple |
| chr2:96645727 | 2   | 96.64573 | 0.022445691 | Credible Set | purple |
| chr2:96697256 | 2   | 96.69726 | 0.022439873 | Credible Set | purple |
| chr2:96697871 | 2   | 96.69787 | 0.019417377 | Credible Set | purple |
| chr2:96697872 | 2   | 96.69787 | 0.019470185 | Credible Set | purple |
| chr2:96701045 | 2   | 96.70104 | 0.016285920 | Credible Set | purple |
| chr2:96701070 | 2   | 96.70107 | 0.016285920 | Credible Set | purple |
| chr2:96701077 | 2   | 96.70108 | 0.016285920 | Credible Set | purple |
| chr2:96701079 | 2   | 96.70108 | 0.016285920 | Credible Set | purple |
| chr2:96701166 | 2   | 96.70117 | 0.020975667 | Credible Set | purple |
| chr2:96766199 | 2   | 96.76620 | 0.018478019 | Credible Set | purple |
| chr2:96771761 | 2   | 96.77176 | 0.008045576 | Credible Set | purple |
| chr2:96771791 | 2   | 96.77179 | 0.008026753 | Credible Set | purple |
| chr2:96786046 | 2   | 96.78605 | 0.002958953 | Credible Set | purple |
| chr2:97355566 | 2   | 97.35557 | 0.001965050 | Credible Set | purple |
| chr2:97741014 | 2   | 97.74101 | 0.001788228 | Credible Set | purple |

F34 GBS, iron content in liver

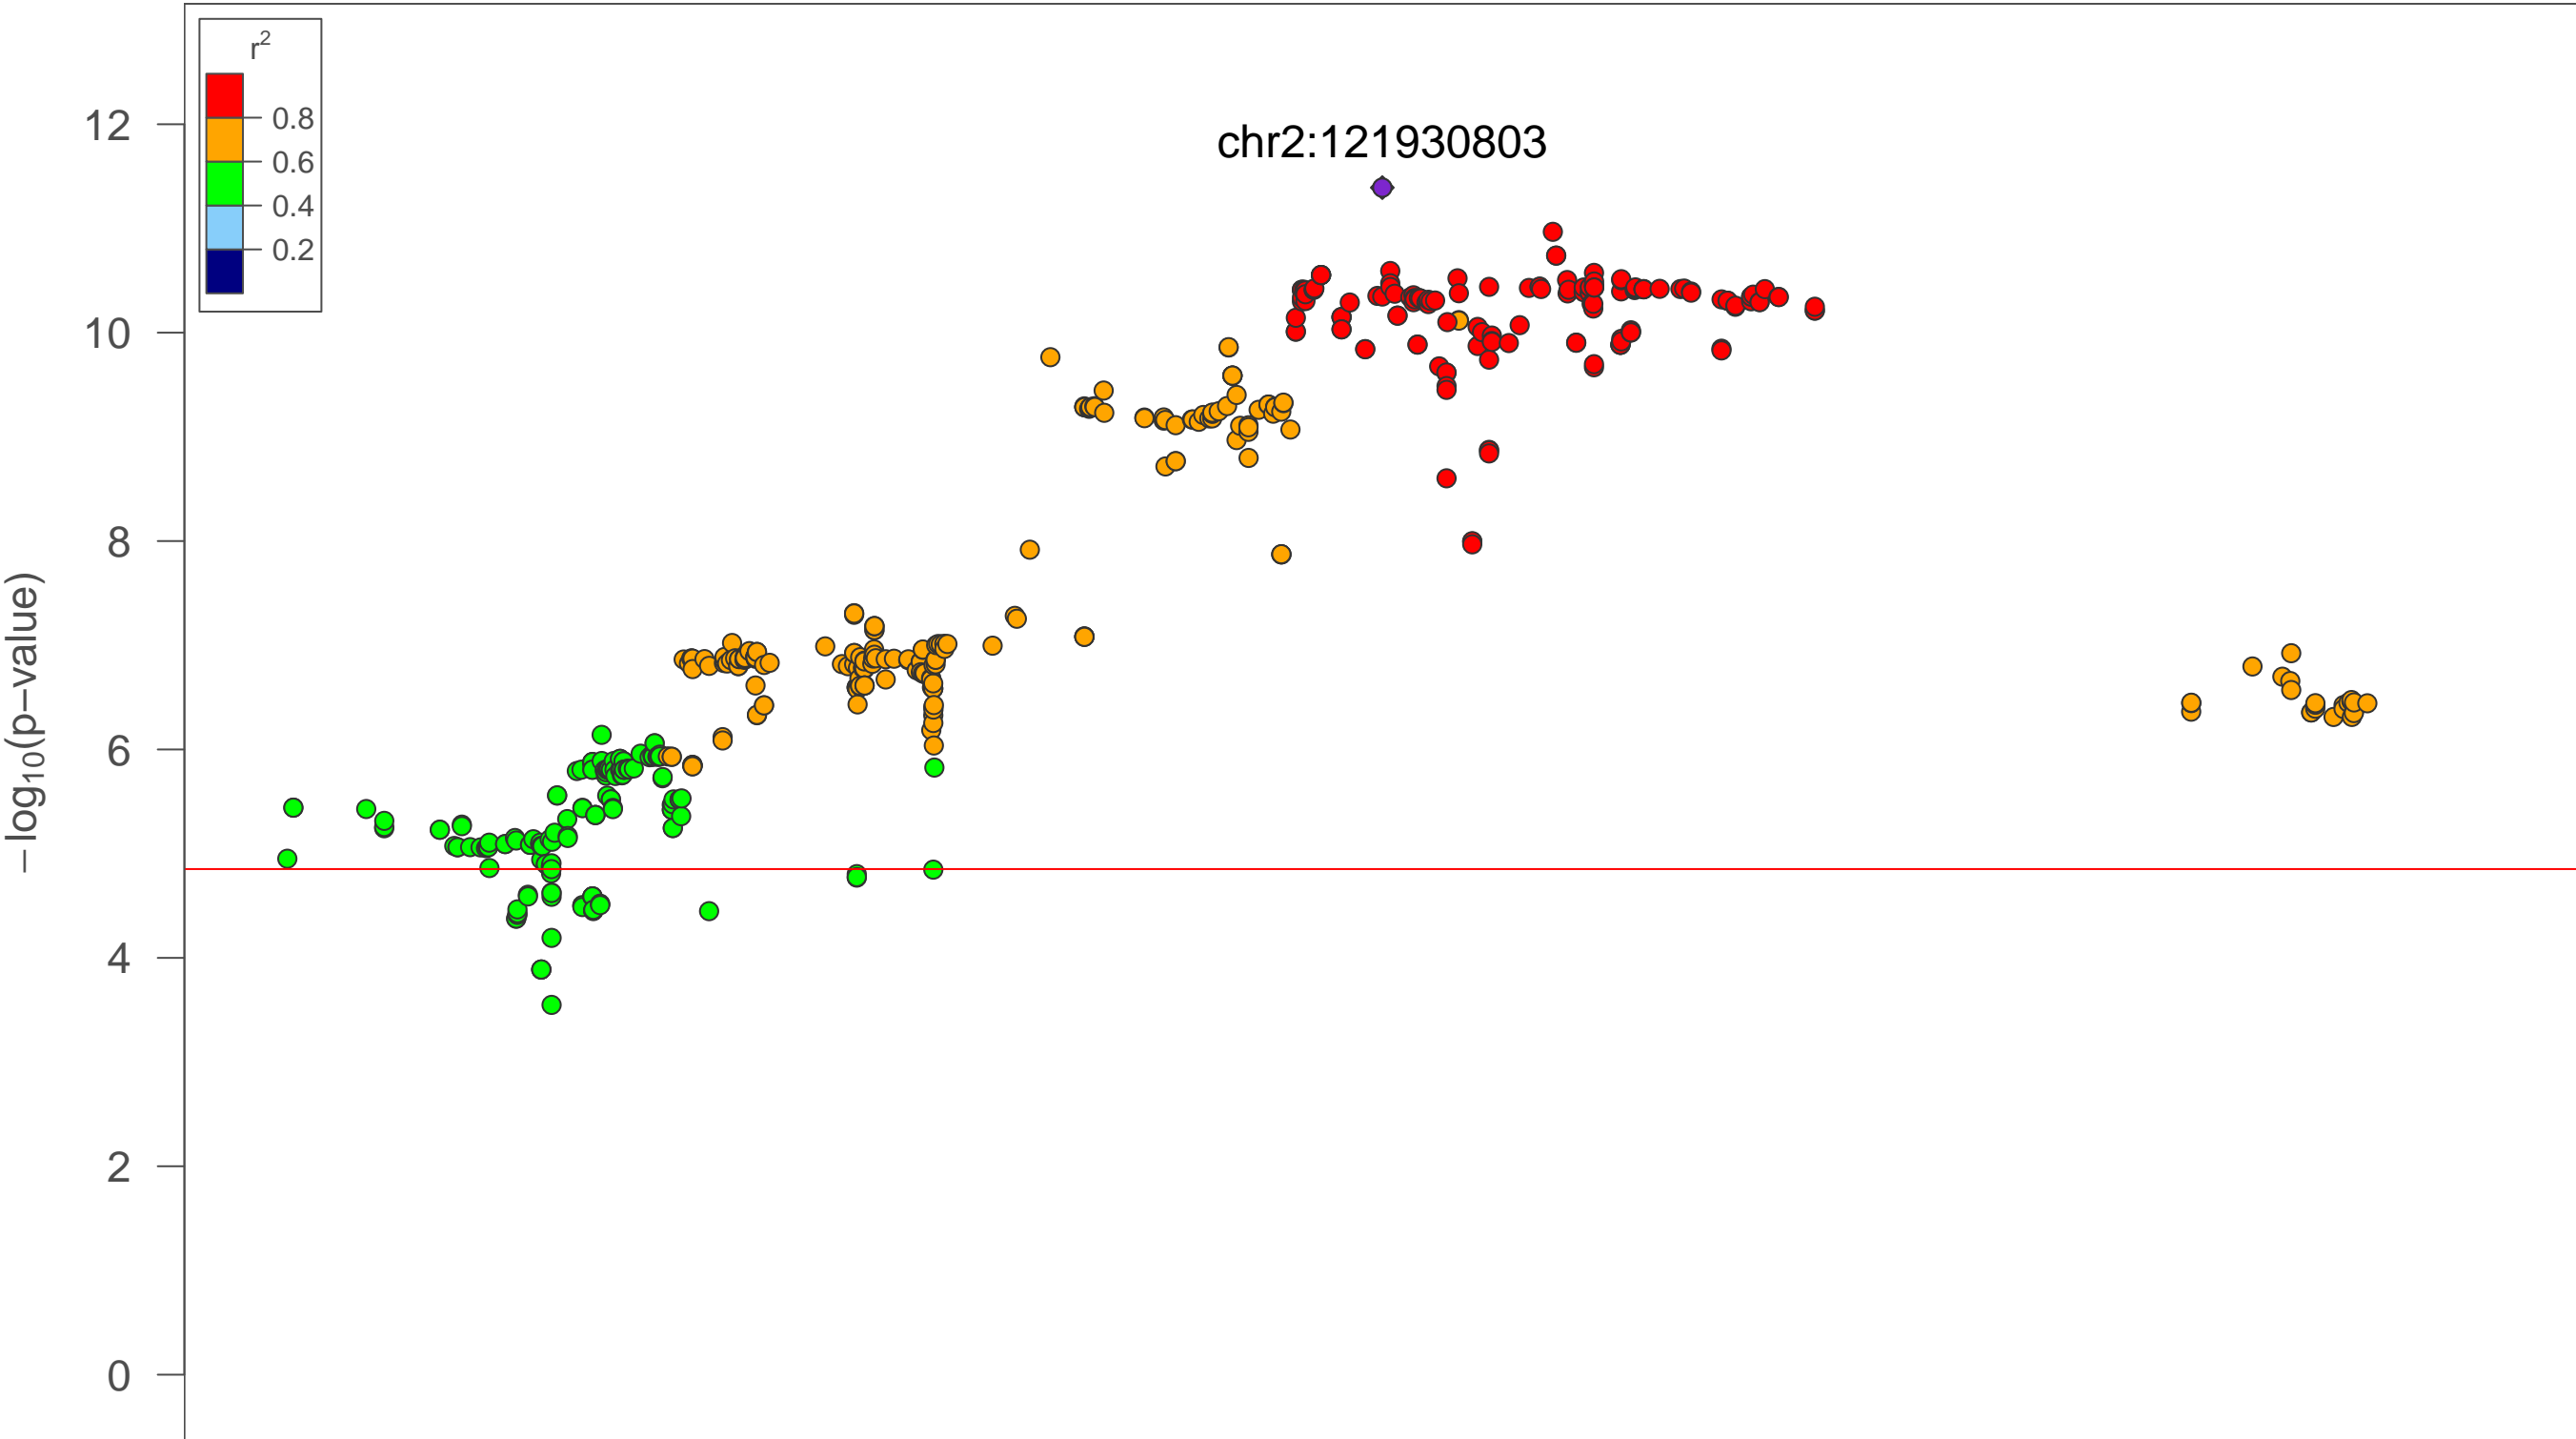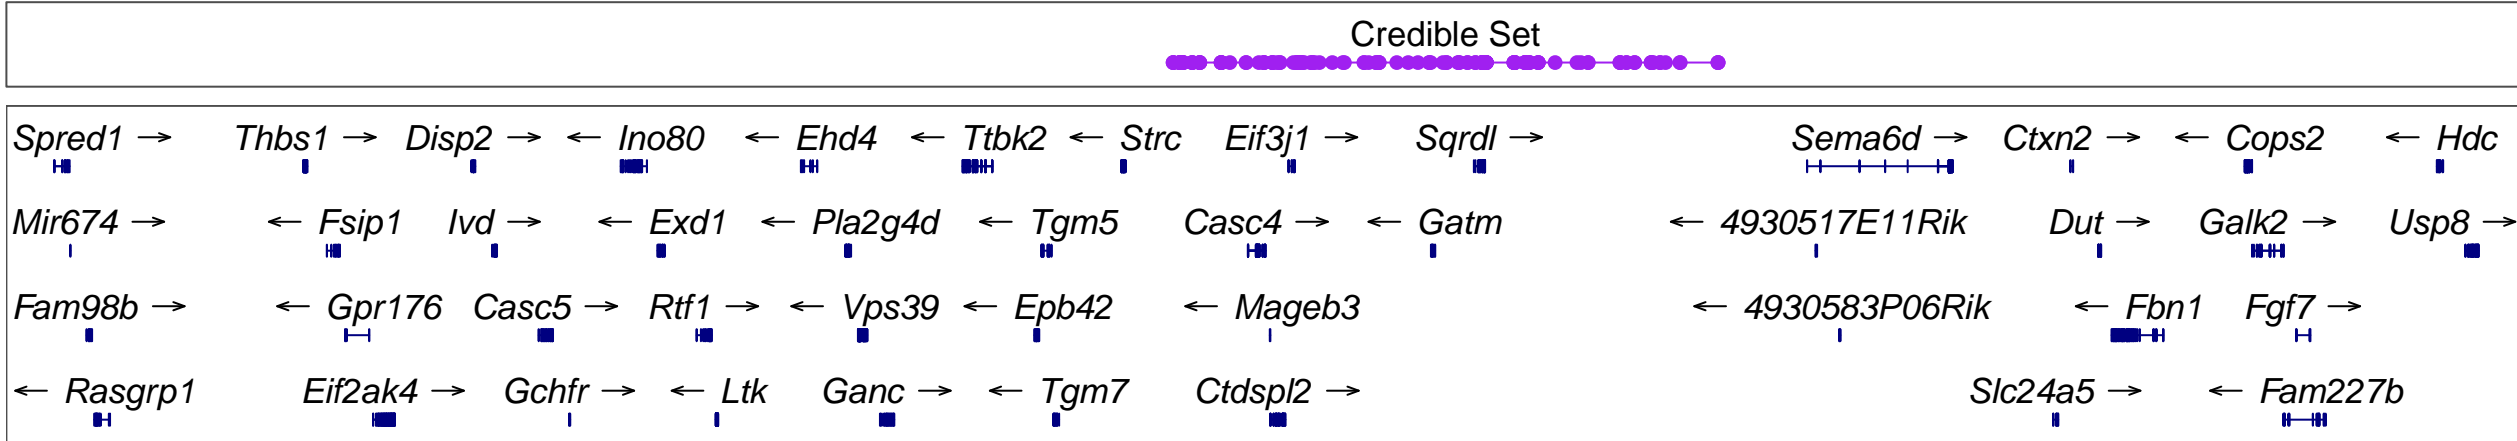

109 genes  
omitted

date: Thu Oct 25 17:15:40 2018

build: F34GBS

display range: chr2:116930803–126930803 [116930803–126930803]

hilite range: 0 – 0 [ 0 – 0 ]

reference SNP: chr2:121930803

number of SNPs plotted: 530

min P-value: 4.06E–12 [chr2:121930803]

max P-value: 2.83E–4 [chr2:118463923]

omitted Genes: Gm13985, 4930412B13Rik, Gm13986

omitted Genes: 1700054M17Rik, Srp14, Bmf

omitted Genes: Bub1b, Pak6, Ankrd63

omitted Genes: Plcb2, Inafm2, A430105I19Rik

omitted Genes: Phgr1, Knstrn, Bahd1

omitted Genes: Chst14, Ccdc32, Rpusd2

omitted Genes: Rad51, Rmdn3, Dnajc17

omitted Genes: Gm14137, Zfyve19, Ppp1r14d

omitted Genes: Spint1, Rhov, Vps18

omitted Genes: Gm14207, Dll4, Chac1

omitted Genes: Chp1, 1700020I14Rik, Oip5

omitted Genes: Nusap1, Ndufaf1, Itpka

omitted Genes: Rpap1, Tyro3, Mga

omitted Genes: Mapkbp1, Mir7665, Jmjd7

omitted Genes: Gm28042, Pla2g4b, Pla2g4e

omitted Genes: Pla2g4f, Tmem87a, 4931402G19Rik

omitted Genes: Capn3, Zfp106, Snap23

omitted Genes: Lrrc57, Haus2, Cdan1

omitted Genes: AV039307, Ubr1, Tmem62

omitted Genes: Ccndbp1, Lcmt2, Adal

omitted Genes: Zscan29, Tubgcp4, Trp53bp1

omitted Genes: Map1a, Ppip5k1, Ckmt1

omitted Genes: Catsper2, Pdia3, Eil3

omitted Genes: Serf2, Serinc4, Hypk

omitted Genes: Mfap1b, Mfap1a, Wdr76

omitted Genes: Frmd5, Spg11, Patl2

omitted Genes: B2m, Trim69, Terb2

omitted Genes: Sord, Duox2, Duoxa2

omitted Genes: Duoxa1, Duox1, Shf

omitted Genes: Slc28a2, Bambi-ps1, Gm14085

omitted Genes: Spata5l1, AA467197, Mir147

omitted Genes: Slc30a4, Blec1c6, Myof2

Make more plots at <http://csg.sph.umich.edu/locuszoom/>

## Fine-mapping Regions

| snp            | chr | pos (Mb) | pp          | group        | color  |
|----------------|-----|----------|-------------|--------------|--------|
| chr2:121569629 | 2   | 121.5696 | 0.003133483 | Credible Set | purple |
| chr2:121569951 | 2   | 121.5700 | 0.003145795 | Credible Set | purple |
| chr2:121570025 | 2   | 121.5700 | 0.004232924 | Credible Set | purple |
| chr2:121595218 | 2   | 121.5952 | 0.007755888 | Credible Set | purple |
| chr2:121595356 | 2   | 121.5954 | 0.007755888 | Credible Set | purple |
| chr2:121595424 | 2   | 121.5954 | 0.006025871 | Credible Set | purple |
| chr2:121595633 | 2   | 121.5956 | 0.006561241 | Credible Set | purple |
| chr2:121605090 | 2   | 121.6051 | 0.007755888 | Credible Set | purple |
| chr2:121605163 | 2   | 121.6052 | 0.007248706 | Credible Set | purple |
| chr2:121609496 | 2   | 121.6095 | 0.007629410 | Credible Set | purple |
| chr2:121609992 | 2   | 121.6100 | 0.006080155 | Credible Set | purple |
| chr2:121610054 | 2   | 121.6101 | 0.007039792 | Credible Set | purple |
| chr2:121644474 | 2   | 121.6445 | 0.007755888 | Credible Set | purple |
| chr2:121644502 | 2   | 121.6445 | 0.007755888 | Credible Set | purple |
| chr2:121647254 | 2   | 121.6473 | 0.007985426 | Credible Set | purple |
| chr2:121675210 | 2   | 121.6752 | 0.010662479 | Credible Set | purple |
| chr2:121675212 | 2   | 121.6752 | 0.010662479 | Credible Set | purple |
| chr2:121675249 | 2   | 121.6752 | 0.010662479 | Credible Set | purple |
| chr2:121675251 | 2   | 121.6753 | 0.010662479 | Credible Set | purple |
| chr2:121760589 | 2   | 121.7606 | 0.004296592 | Credible Set | purple |
| chr2:121760592 | 2   | 121.7606 | 0.004296592 | Credible Set | purple |
| chr2:121760608 | 2   | 121.7606 | 0.004296592 | Credible Set | purple |
| chr2:121760655 | 2   | 121.7607 | 0.003294660 | Credible Set | purple |
| chr2:121760675 | 2   | 121.7607 | 0.003294660 | Credible Set | purple |
| chr2:121795014 | 2   | 121.7950 | 0.005887328 | Credible Set | purple |
| chr2:121859536 | 2   | 121.8595 | 0.002151535 | Credible Set | purple |
| chr2:121859542 | 2   | 121.8595 | 0.002143376 | Credible Set | purple |
| chr2:121910457 | 2   | 121.9105 | 0.006793285 | Credible Set | purple |
| chr2:121930722 | 2   | 121.9307 | 0.006694281 | Credible Set | purple |
| chr2:121930803 | 2   | 121.9308 | 0.070714562 | Credible Set | purple |
| chr2:121930806 | 2   | 121.9308 | 0.070714562 | Credible Set | purple |
| chr2:121963958 | 2   | 121.9640 | 0.011635947 | Credible Set | purple |
| chr2:121964022 | 2   | 121.9640 | 0.008924639 | Credible Set | purple |
| chr2:121964577 | 2   | 121.9646 | 0.008234906 | Credible Set | purple |
| chr2:121982399 | 2   | 121.9824 | 0.007118213 | Credible Set | purple |
| chr2:121994315 | 2   | 121.9943 | 0.004434478 | Credible Set | purple |

## Fine-mapping Regions

| snp            | chr | pos (Mb) | pp          | group        | color  |
|----------------|-----|----------|-------------|--------------|--------|
| chr2:121994324 | 2   | 121.9943 | 0.004434478 | Credible Set | purple |
| chr2:122047663 | 2   | 122.0477 | 0.006586628 | Credible Set | purple |
| chr2:122060688 | 2   | 122.0607 | 0.006885602 | Credible Set | purple |
| chr2:122061099 | 2   | 122.0611 | 0.005927683 | Credible Set | purple |
| chr2:122065787 | 2   | 122.0658 | 0.006477903 | Credible Set | purple |
| chr2:122065870 | 2   | 122.0659 | 0.006301764 | Credible Set | purple |
| chr2:122077766 | 2   | 122.0778 | 0.002370989 | Credible Set | purple |
| chr2:122077798 | 2   | 122.0778 | 0.002370989 | Credible Set | purple |
| chr2:122083136 | 2   | 122.0831 | 0.006504421 | Credible Set | purple |
| chr2:122090229 | 2   | 122.0902 | 0.006422790 | Credible Set | purple |
| chr2:122115252 | 2   | 122.1153 | 0.005878040 | Credible Set | purple |
| chr2:122122941 | 2   | 122.1229 | 0.005690708 | Credible Set | purple |
| chr2:122123313 | 2   | 122.1233 | 0.006247165 | Credible Set | purple |
| chr2:122132763 | 2   | 122.1328 | 0.006087368 | Credible Set | purple |
| chr2:122151119 | 2   | 122.1511 | 0.006149327 | Credible Set | purple |
| chr2:122202473 | 2   | 122.2025 | 0.003852653 | Credible Set | purple |
| chr2:122244672 | 2   | 122.2447 | 0.009937406 | Credible Set | purple |
| chr2:122250299 | 2   | 122.2503 | 0.007191398 | Credible Set | purple |
| chr2:122328643 | 2   | 122.3286 | 0.002299839 | Credible Set | purple |
| chr2:122328650 | 2   | 122.3286 | 0.003475004 | Credible Set | purple |
| chr2:122346906 | 2   | 122.3469 | 0.003101151 | Credible Set | purple |
| chr2:122376352 | 2   | 122.3764 | 0.001713187 | Credible Set | purple |
| chr2:122376463 | 2   | 122.3765 | 0.008258864 | Credible Set | purple |
| chr2:122387979 | 2   | 122.3880 | 0.002883818 | Credible Set | purple |
| chr2:122388097 | 2   | 122.3881 | 0.002561703 | Credible Set | purple |
| chr2:122388208 | 2   | 122.3882 | 0.002514832 | Credible Set | purple |
| chr2:122458764 | 2   | 122.4588 | 0.002451155 | Credible Set | purple |
| chr2:122504055 | 2   | 122.5041 | 0.003608100 | Credible Set | purple |
| chr2:122542898 | 2   | 122.5429 | 0.008070659 | Credible Set | purple |
| chr2:122587284 | 2   | 122.5873 | 0.008272898 | Credible Set | purple |
| chr2:122587743 | 2   | 122.5877 | 0.008298741 | Credible Set | purple |
| chr2:122593432 | 2   | 122.5934 | 0.007882663 | Credible Set | purple |
| chr2:122642503 | 2   | 122.6425 | 0.027157517 | Credible Set | purple |
| chr2:122656435 | 2   | 122.6564 | 0.016242538 | Credible Set | purple |
| chr2:122656458 | 2   | 122.6565 | 0.016242538 | Credible Set | purple |
| chr2:122702118 | 2   | 122.7021 | 0.009577217 | Credible Set | purple |

## Fine-mapping Regions

| snp            | chr | pos (Mb) | pp          | group        | color  |
|----------------|-----|----------|-------------|--------------|--------|
| chr2:122704152 | 2   | 122.7042 | 0.007164023 | Credible Set | purple |
| chr2:122708239 | 2   | 122.7082 | 0.007755888 | Credible Set | purple |
| chr2:122739988 | 2   | 122.7400 | 0.002470998 | Credible Set | purple |
| chr2:122740035 | 2   | 122.7400 | 0.002469759 | Credible Set | purple |
| chr2:122771056 | 2   | 122.7711 | 0.007366102 | Credible Set | purple |
| chr2:122771465 | 2   | 122.7715 | 0.008149988 | Credible Set | purple |
| chr2:122797192 | 2   | 122.7972 | 0.007263408 | Credible Set | purple |
| chr2:122797216 | 2   | 122.7972 | 0.007219008 | Credible Set | purple |
| chr2:122797265 | 2   | 122.7973 | 0.008181448 | Credible Set | purple |
| chr2:122797266 | 2   | 122.7973 | 0.008197958 | Credible Set | purple |
| chr2:122804433 | 2   | 122.8044 | 0.005736508 | Credible Set | purple |
| chr2:122811212 | 2   | 122.8112 | 0.005168723 | Credible Set | purple |
| chr2:122811304 | 2   | 122.8113 | 0.005727219 | Credible Set | purple |
| chr2:122814314 | 2   | 122.8143 | 0.011175145 | Credible Set | purple |
| chr2:122814326 | 2   | 122.8143 | 0.008402303 | Credible Set | purple |
| chr2:122814381 | 2   | 122.8144 | 0.008531467 | Credible Set | purple |
| chr2:122814728 | 2   | 122.8147 | 0.009274010 | Credible Set | purple |
| chr2:122814902 | 2   | 122.8149 | 0.008132534 | Credible Set | purple |
| chr2:122814909 | 2   | 122.8149 | 0.008149358 | Credible Set | purple |
| chr2:122924669 | 2   | 122.9247 | 0.002361641 | Credible Set | purple |
| chr2:122924685 | 2   | 122.9247 | 0.002371527 | Credible Set | purple |
| chr2:122924695 | 2   | 122.9247 | 0.002361641 | Credible Set | purple |
| chr2:122924696 | 2   | 122.9247 | 0.002361641 | Credible Set | purple |
| chr2:122927536 | 2   | 122.9275 | 0.007485543 | Credible Set | purple |
| chr2:122927903 | 2   | 122.9279 | 0.009534543 | Credible Set | purple |
| chr2:122927980 | 2   | 122.9280 | 0.009752696 | Credible Set | purple |
| chr2:122927997 | 2   | 122.9280 | 0.002683199 | Credible Set | purple |
| chr2:122928025 | 2   | 122.9280 | 0.002539716 | Credible Set | purple |
| chr2:122968234 | 2   | 122.9682 | 0.003161310 | Credible Set | purple |
| chr2:122968260 | 2   | 122.9683 | 0.003230687 | Credible Set | purple |
| chr2:122968275 | 2   | 122.9683 | 0.003075386 | Credible Set | purple |
| chr2:122968296 | 2   | 122.9683 | 0.003088519 | Credible Set | purple |
| chr2:122983867 | 2   | 122.9839 | 0.007704921 | Credible Set | purple |
| chr2:122986477 | 2   | 122.9865 | 0.007941141 | Credible Set | purple |
| chr2:122986971 | 2   | 122.9870 | 0.008167152 | Credible Set | purple |
| chr2:123021071 | 2   | 123.0211 | 0.007846689 | Credible Set | purple |



## Fine-mapping Regions

| snp            | chr | pos (Mb) | pp          | group        | color  |
|----------------|-----|----------|-------------|--------------|--------|
| chr2:123021090 | 2   | 123.0211 | 0.007872734 | Credible Set | purple |
| chr2:123021532 | 2   | 123.0215 | 0.007823060 | Credible Set | purple |
| chr2:123088225 | 2   | 123.0882 | 0.007912931 | Credible Set | purple |
| chr2:123175096 | 2   | 123.1751 | 0.007879959 | Credible Set | purple |
| chr2:123190496 | 2   | 123.1905 | 0.007960532 | Credible Set | purple |
| chr2:123219436 | 2   | 123.2194 | 0.007469322 | Credible Set | purple |
| chr2:123219468 | 2   | 123.2195 | 0.007281566 | Credible Set | purple |
| chr2:123346239 | 2   | 123.3462 | 0.002171426 | Credible Set | purple |
| chr2:123346253 | 2   | 123.3463 | 0.002090464 | Credible Set | purple |
| chr2:123346704 | 2   | 123.3467 | 0.006300361 | Credible Set | purple |
| chr2:123371857 | 2   | 123.3719 | 0.006120310 | Credible Set | purple |
| chr2:123371991 | 2   | 123.3720 | 0.006120310 | Credible Set | purple |
| chr2:123404160 | 2   | 123.4042 | 0.005368147 | Credible Set | purple |
| chr2:123404632 | 2   | 123.4046 | 0.005499987 | Credible Set | purple |
| chr2:123470044 | 2   | 123.4700 | 0.006042828 | Credible Set | purple |
| chr2:123470368 | 2   | 123.4704 | 0.006689148 | Credible Set | purple |
| chr2:123470382 | 2   | 123.4704 | 0.006688751 | Credible Set | purple |
| chr2:123478720 | 2   | 123.4787 | 0.006981594 | Credible Set | purple |
| chr2:123505482 | 2   | 123.5055 | 0.005959121 | Credible Set | purple |
| chr2:123505557 | 2   | 123.5056 | 0.005930026 | Credible Set | purple |
| chr2:123527223 | 2   | 123.5272 | 0.007863122 | Credible Set | purple |
| chr2:123584403 | 2   | 123.5844 | 0.006645888 | Credible Set | purple |
| chr2:123585516 | 2   | 123.5855 | 0.006613768 | Credible Set | purple |
| chr2:123735848 | 2   | 123.7358 | 0.004937967 | Credible Set | purple |
| chr2:123735871 | 2   | 123.7359 | 0.004946098 | Credible Set | purple |
| chr2:123735958 | 2   | 123.7360 | 0.005374211 | Credible Set | purple |

# F34 GBS, iron content in liver

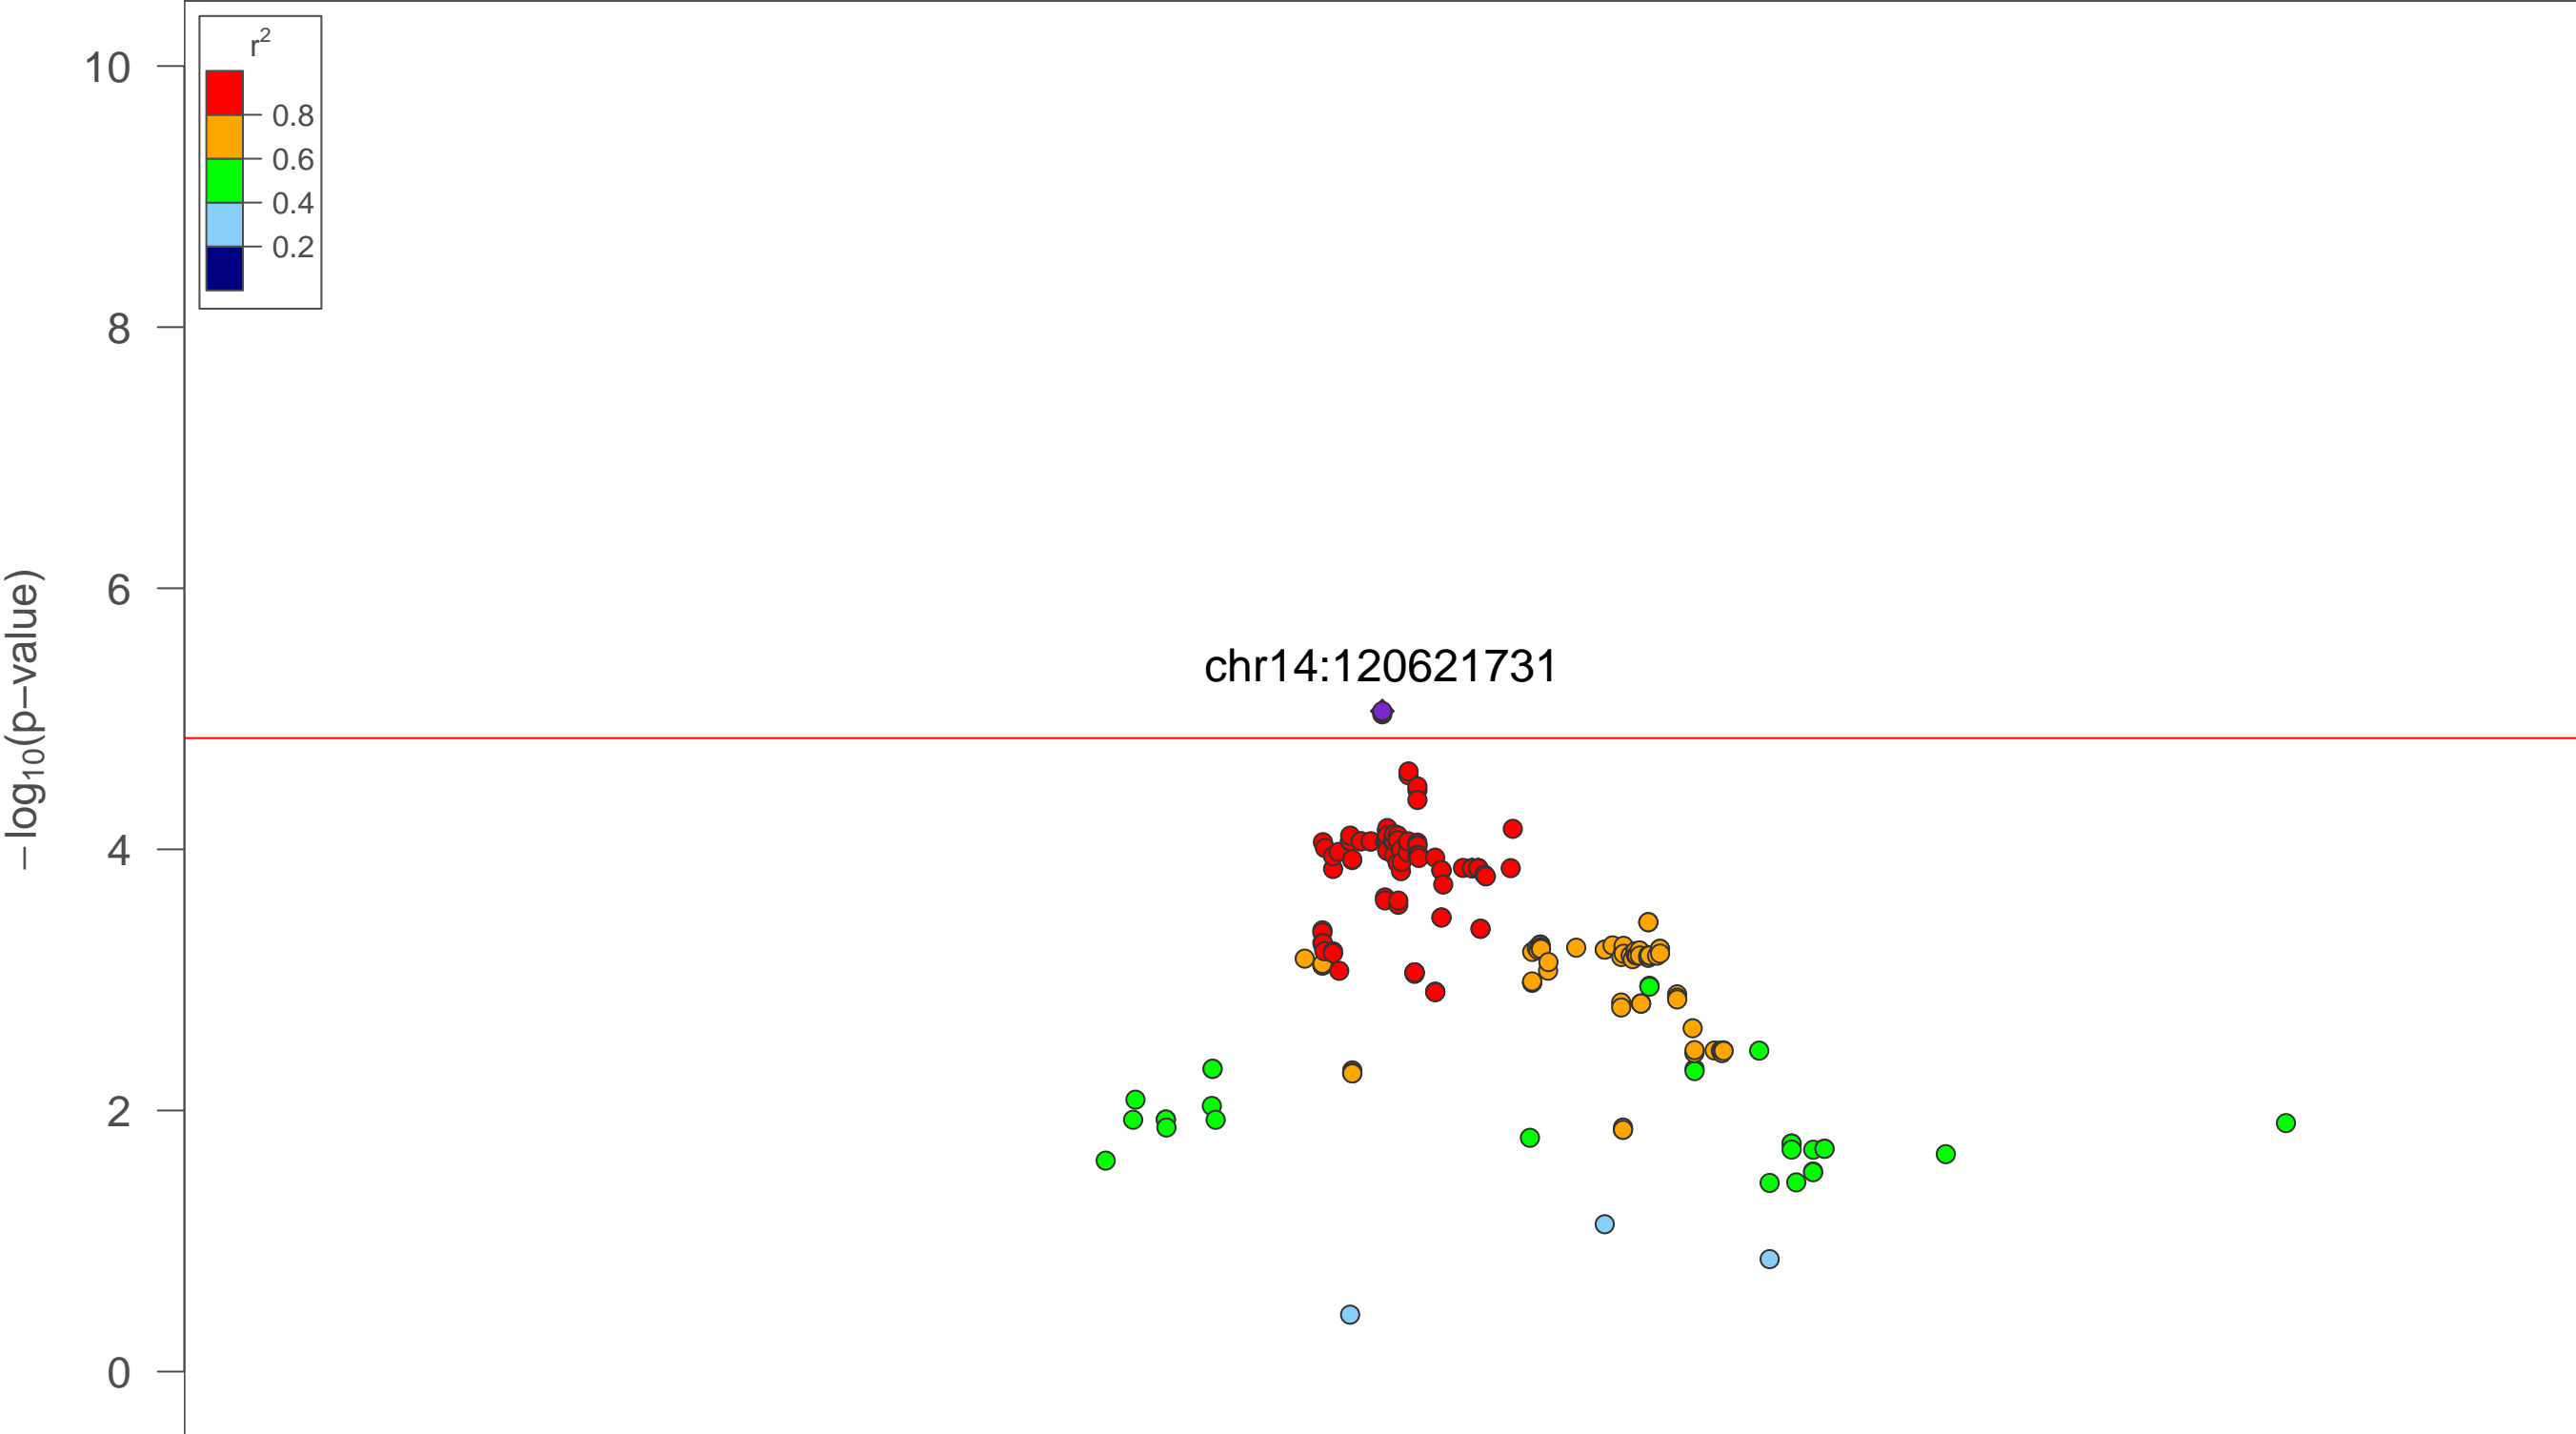

Credible Set

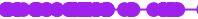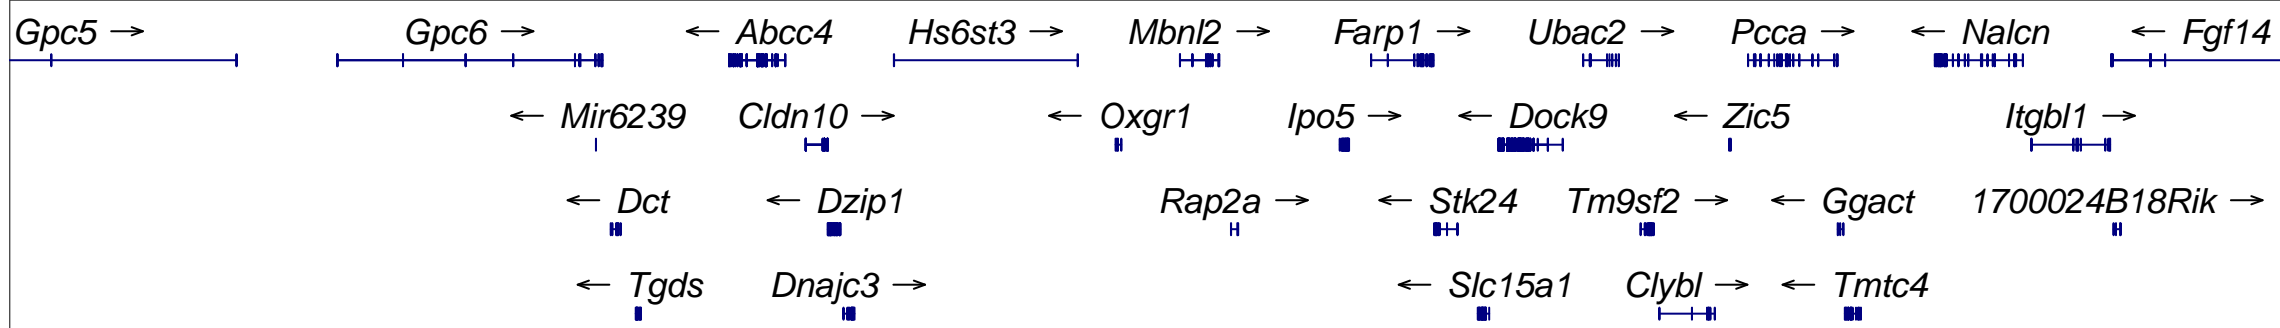

19 genes  
omitted

date: Thu Oct 25 17:15:18 2018

build: F34GBS

display range: chr14:115621731–125621731 [115621731–125621731]

hilite range: 0 – 0 [ 0 – 0 ]

reference SNP: chr14:120621731

number of SNPs plotted: 206

min P-value: 8.72E–6 [chr14:120621731]

max P-value: 3.66E–1 [chr14:120487423]

omitted Genes: Gpr180, Sox21, LOC105245869

omitted Genes: Mir6241, Gm9376, 1700044C05Rik

omitted Genes: Mir6391, Ugg2, 1700006F04Rik

omitted Genes: 1810041H14Rik, Gpr18, Gpr183

omitted Genes: Timm8a2, A330035P11Rik, 1700108J01Rik

omitted Genes: Gm5089, 2610035F20Rik, Zic2

omitted Genes: AA536875

## Fine-mapping Regions

| snp             | chr | pos (Mb) | pp          | group        | color  |
|-----------------|-----|----------|-------------|--------------|--------|
| chr14:120371692 | 14  | 120.3717 | 0.002269808 | Credible Set | purple |
| chr14:120371706 | 14  | 120.3717 | 0.002191663 | Credible Set | purple |
| chr14:120371729 | 14  | 120.3717 | 0.001849816 | Credible Set | purple |
| chr14:120373900 | 14  | 120.3739 | 0.009793911 | Credible Set | purple |
| chr14:120374171 | 14  | 120.3742 | 0.001784498 | Credible Set | purple |
| chr14:120374181 | 14  | 120.3742 | 0.001837517 | Credible Set | purple |
| chr14:120379882 | 14  | 120.3799 | 0.001610230 | Credible Set | purple |
| chr14:120382338 | 14  | 120.3823 | 0.008887336 | Credible Set | purple |
| chr14:120416102 | 14  | 120.4161 | 0.001607522 | Credible Set | purple |
| chr14:120416136 | 14  | 120.4161 | 0.001558402 | Credible Set | purple |
| chr14:120416333 | 14  | 120.4163 | 0.006266201 | Credible Set | purple |
| chr14:120416347 | 14  | 120.4163 | 0.007748995 | Credible Set | purple |
| chr14:120439342 | 14  | 120.4393 | 0.008325976 | Credible Set | purple |
| chr14:120487392 | 14  | 120.4874 | 0.009982187 | Credible Set | purple |
| chr14:120487416 | 14  | 120.4874 | 0.009973058 | Credible Set | purple |
| chr14:120487566 | 14  | 120.4876 | 0.009973058 | Credible Set | purple |
| chr14:120487639 | 14  | 120.4876 | 0.010923959 | Credible Set | purple |
| chr14:120495956 | 14  | 120.4960 | 0.007265250 | Credible Set | purple |
| chr14:120495976 | 14  | 120.4960 | 0.007352010 | Credible Set | purple |
| chr14:120532718 | 14  | 120.5327 | 0.009935141 | Credible Set | purple |
| chr14:120532740 | 14  | 120.5327 | 0.009935141 | Credible Set | purple |
| chr14:120573821 | 14  | 120.5738 | 0.009873525 | Credible Set | purple |
| chr14:120573951 | 14  | 120.5740 | 0.009935141 | Credible Set | purple |
| chr14:120621718 | 14  | 120.6217 | 0.083468244 | Credible Set | purple |
| chr14:120621731 | 14  | 120.6217 | 0.088133759 | Credible Set | purple |
| chr14:120621749 | 14  | 120.6217 | 0.086407684 | Credible Set | purple |
| chr14:120632852 | 14  | 120.6329 | 0.003910726 | Credible Set | purple |
| chr14:120632882 | 14  | 120.6329 | 0.003722401 | Credible Set | purple |
| chr14:120633549 | 14  | 120.6335 | 0.009935141 | Credible Set | purple |
| chr14:120641466 | 14  | 120.6415 | 0.011887200 | Credible Set | purple |
| chr14:120641472 | 14  | 120.6415 | 0.011887200 | Credible Set | purple |
| chr14:120641546 | 14  | 120.6415 | 0.009935141 | Credible Set | purple |
| chr14:120642644 | 14  | 120.6426 | 0.012387622 | Credible Set | purple |
| chr14:120642688 | 14  | 120.6427 | 0.010961154 | Credible Set | purple |
| chr14:120642702 | 14  | 120.6427 | 0.008469508 | Credible Set | purple |
| chr14:120642723 | 14  | 120.6427 | 0.008469508 | Credible Set | purple |

## Fine-mapping Regions

| snp             | chr | pos (Mb) | pp          | group        | color  |
|-----------------|-----|----------|-------------|--------------|--------|
| chr14:120665611 | 14  | 120.6656 | 0.009935141 | Credible Set | purple |
| chr14:120670727 | 14  | 120.6707 | 0.007891510 | Credible Set | purple |
| chr14:120671083 | 14  | 120.6711 | 0.009935141 | Credible Set | purple |
| chr14:120671092 | 14  | 120.6711 | 0.009935141 | Credible Set | purple |
| chr14:120671147 | 14  | 120.6711 | 0.009935141 | Credible Set | purple |
| chr14:120671180 | 14  | 120.6712 | 0.011159893 | Credible Set | purple |
| chr14:120671181 | 14  | 120.6712 | 0.011187145 | Credible Set | purple |
| chr14:120686008 | 14  | 120.6860 | 0.006905295 | Credible Set | purple |
| chr14:120686112 | 14  | 120.6861 | 0.010960143 | Credible Set | purple |
| chr14:120686362 | 14  | 120.6864 | 0.010143590 | Credible Set | purple |
| chr14:120686413 | 14  | 120.6864 | 0.010105737 | Credible Set | purple |
| chr14:120688462 | 14  | 120.6885 | 0.003459534 | Credible Set | purple |
| chr14:120688492 | 14  | 120.6885 | 0.003712945 | Credible Set | purple |
| chr14:120699639 | 14  | 120.6996 | 0.006046421 | Credible Set | purple |
| chr14:120699675 | 14  | 120.6997 | 0.008623701 | Credible Set | purple |
| chr14:120702426 | 14  | 120.7024 | 0.007042586 | Credible Set | purple |
| chr14:120728333 | 14  | 120.7283 | 0.009800183 | Credible Set | purple |
| chr14:120728361 | 14  | 120.7284 | 0.008240755 | Credible Set | purple |
| chr14:120730072 | 14  | 120.7301 | 0.009935141 | Credible Set | purple |
| chr14:120731135 | 14  | 120.7311 | 0.029942186 | Credible Set | purple |
| chr14:120731136 | 14  | 120.7311 | 0.031995432 | Credible Set | purple |
| chr14:120767991 | 14  | 120.7680 | 0.009722721 | Credible Set | purple |
| chr14:120768037 | 14  | 120.7680 | 0.009353242 | Credible Set | purple |
| chr14:120768301 | 14  | 120.7683 | 0.023343015 | Credible Set | purple |
| chr14:120768336 | 14  | 120.7683 | 0.024874429 | Credible Set | purple |
| chr14:120768349 | 14  | 120.7683 | 0.019802031 | Credible Set | purple |
| chr14:120768705 | 14  | 120.7687 | 0.009242886 | Credible Set | purple |
| chr14:120768743 | 14  | 120.7687 | 0.007934912 | Credible Set | purple |
| chr14:120768819 | 14  | 120.7688 | 0.007832997 | Credible Set | purple |
| chr14:120774259 | 14  | 120.7743 | 0.007683939 | Credible Set | purple |
| chr14:120774290 | 14  | 120.7743 | 0.007892917 | Credible Set | purple |
| chr14:120774318 | 14  | 120.7743 | 0.007530706 | Credible Set | purple |
| chr14:120842399 | 14  | 120.8424 | 0.007567607 | Credible Set | purple |
| chr14:120868390 | 14  | 120.8684 | 0.006115525 | Credible Set | purple |
| chr14:120868527 | 14  | 120.8685 | 0.006141997 | Credible Set | purple |
| chr14:120868538 | 14  | 120.8685 | 0.006141997 | Credible Set | purple |

Fine-mapping Regions

| snp             | chr | pos (Mb) | pp          | group        | color  |
|-----------------|-----|----------|-------------|--------------|--------|
| chr14:120868670 | 14  | 120.8687 | 0.002806309 | Credible Set | purple |
| chr14:120868693 | 14  | 120.8687 | 0.002806309 | Credible Set | purple |
| chr14:120875959 | 14  | 120.8760 | 0.004840687 | Credible Set | purple |
| chr14:120958410 | 14  | 120.9584 | 0.006378942 | Credible Set | purple |
| chr14:120996497 | 14  | 120.9965 | 0.006353278 | Credible Set | purple |
| chr14:120996551 | 14  | 120.9966 | 0.006353278 | Credible Set | purple |
| chr14:120996555 | 14  | 120.9966 | 0.006353278 | Credible Set | purple |
| chr14:120996573 | 14  | 120.9966 | 0.006353278 | Credible Set | purple |
| chr14:121021982 | 14  | 121.0220 | 0.006353278 | Credible Set | purple |
| chr14:121022009 | 14  | 121.0220 | 0.006353278 | Credible Set | purple |
| chr14:121022048 | 14  | 121.0220 | 0.006353278 | Credible Set | purple |
| chr14:121022050 | 14  | 121.0220 | 0.006353278 | Credible Set | purple |
| chr14:121031640 | 14  | 121.0316 | 0.002329522 | Credible Set | purple |
| chr14:121031672 | 14  | 121.0317 | 0.002329522 | Credible Set | purple |
| chr14:121047713 | 14  | 121.0477 | 0.005711483 | Credible Set | purple |
| chr14:121054065 | 14  | 121.0541 | 0.005540939 | Credible Set | purple |
| chr14:121157624 | 14  | 121.1576 | 0.006353278 | Credible Set | purple |
| chr14:121166355 | 14  | 121.1664 | 0.012231142 | Credible Set | purple |

F34 GBS, iron content in liver

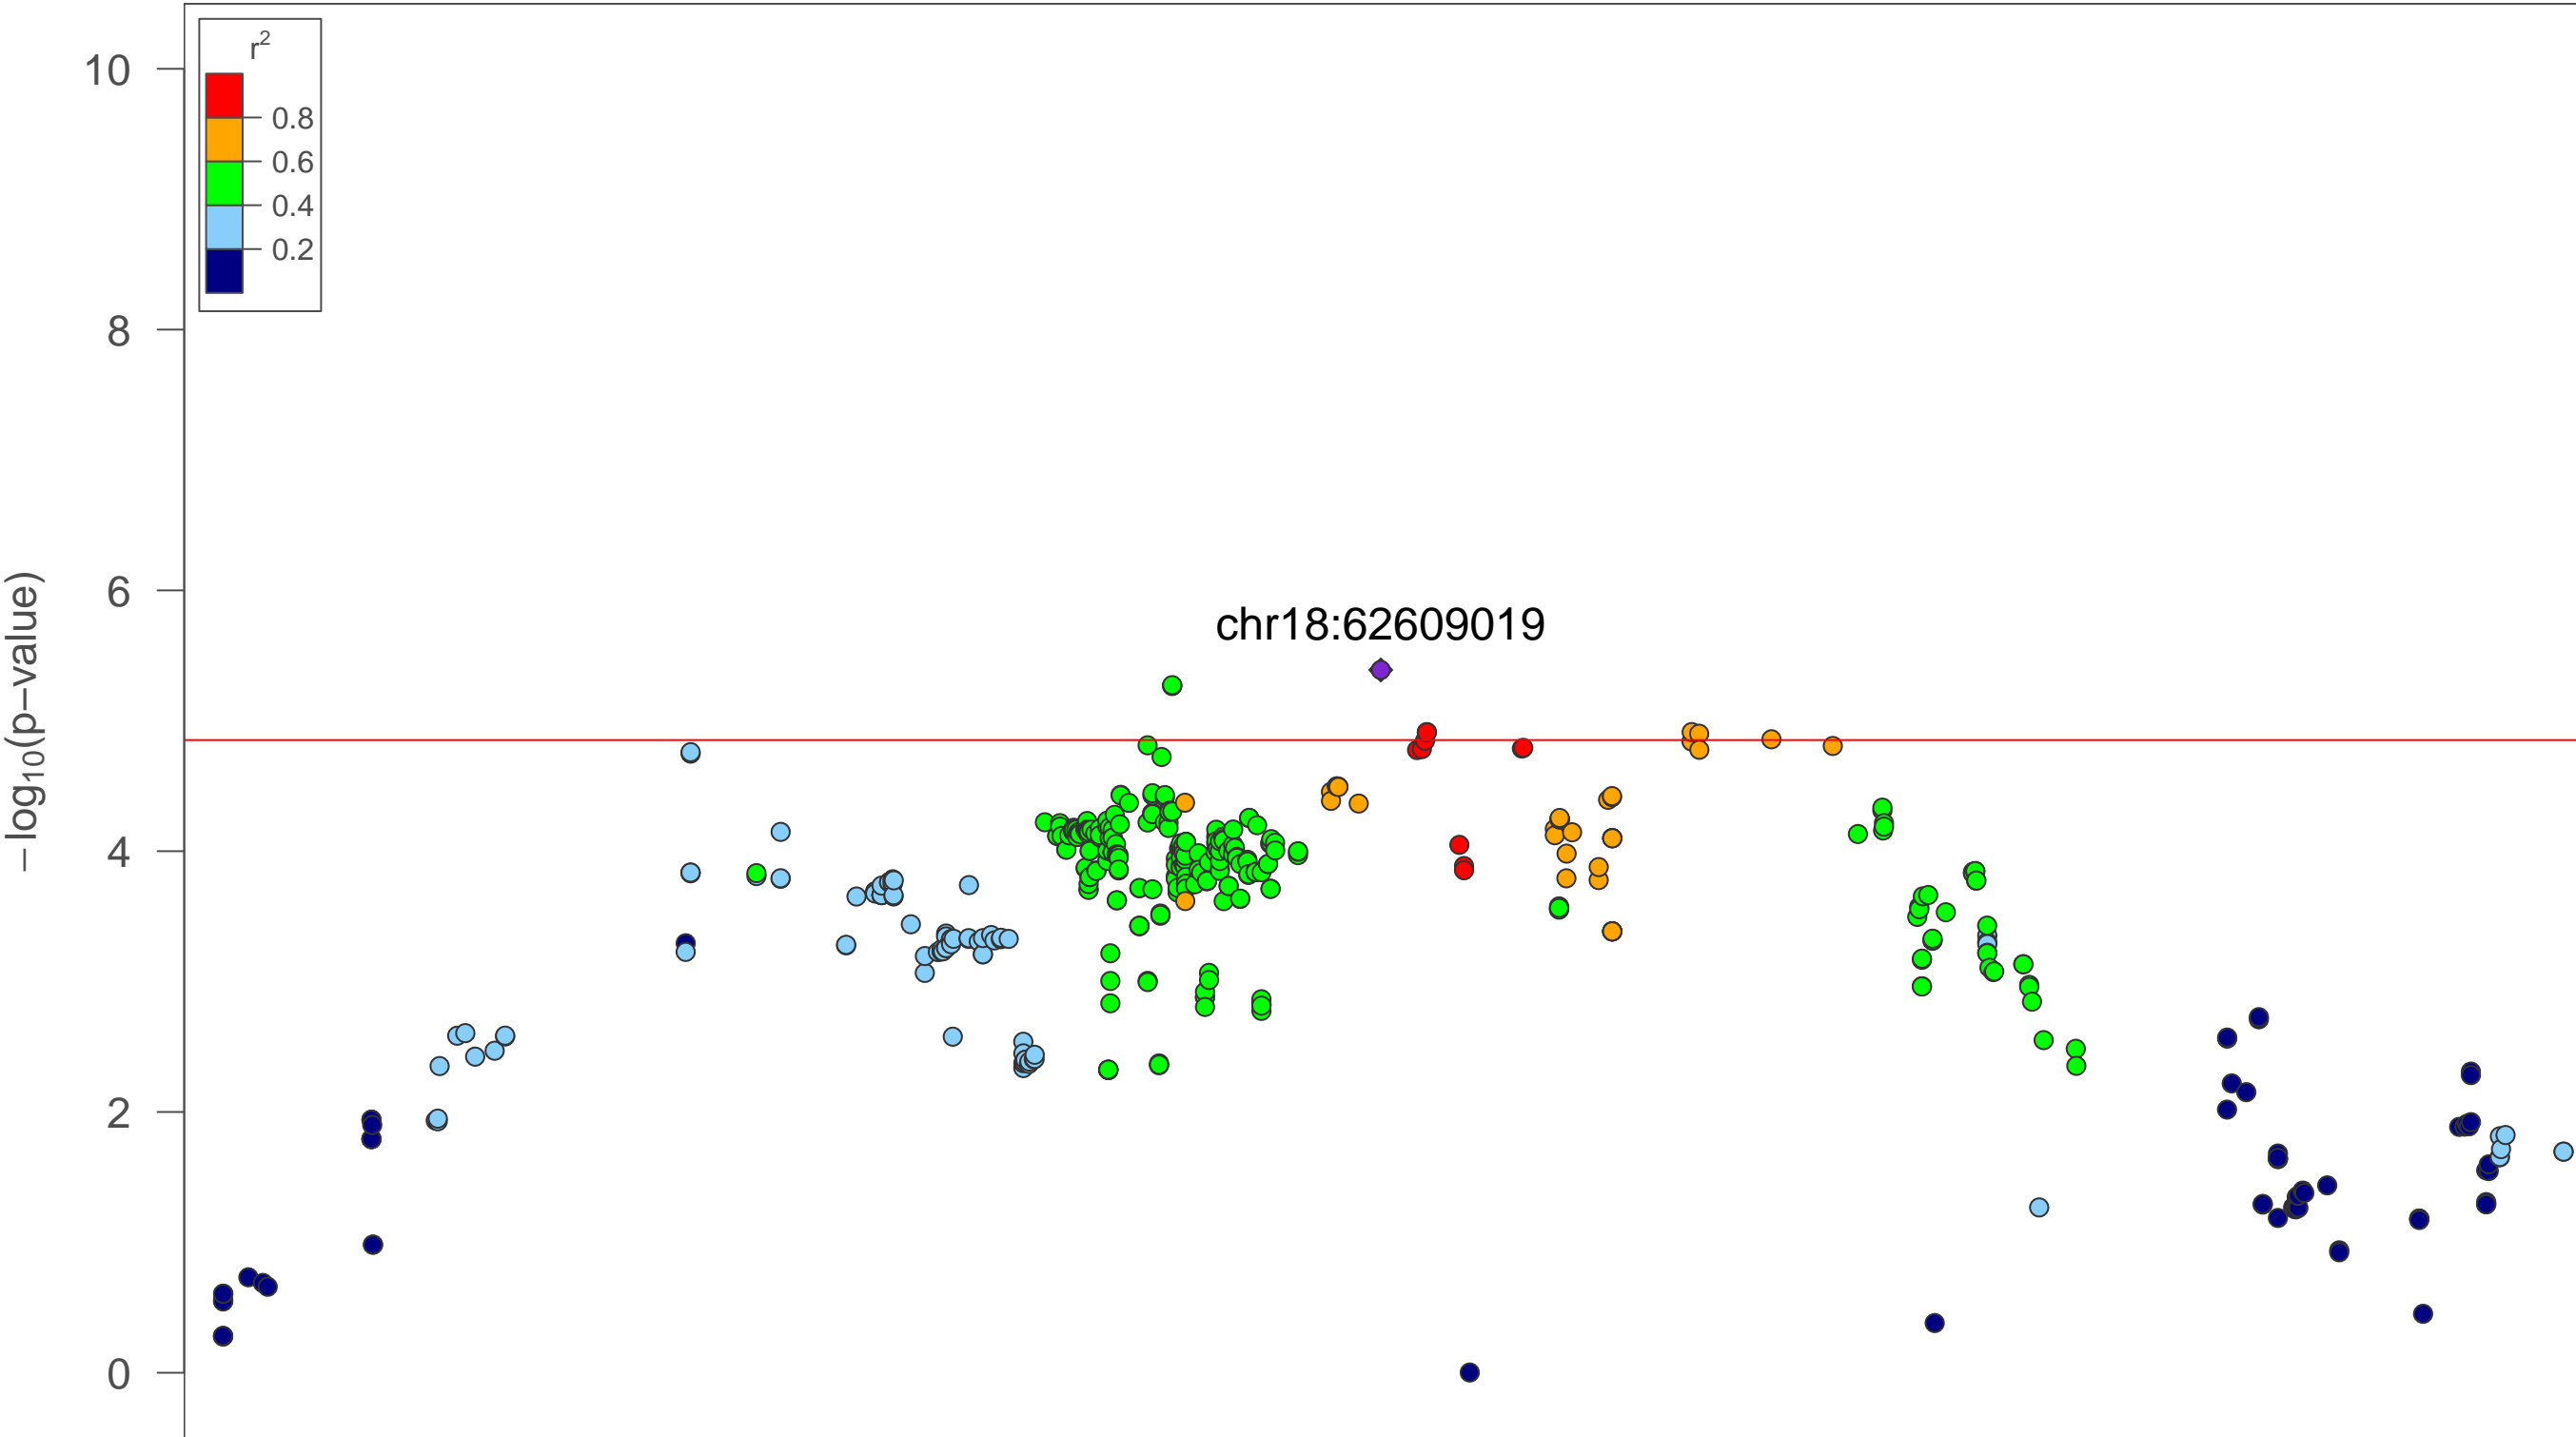

Credible Set

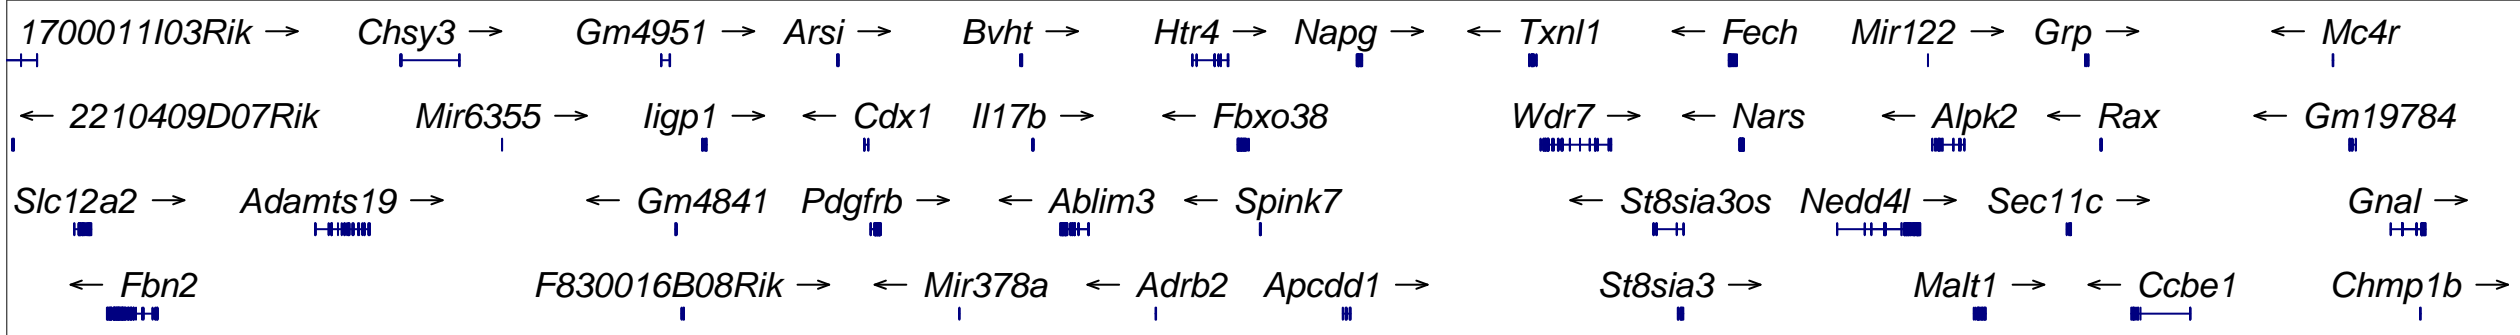

56 genes  
omitted

date: Thu Oct 25 17:15:30 2018  
build: F34GBS  
display range: chr18:57609019–67609019 [57609019–67609019]  
hilite range: 0 – 0 [ 0 – 0 ]  
reference SNP: chr18:62609019  
number of SNPs plotted: 481  
min P-value: 4.08E–6 [chr18:62609019]  
max P-value: 9.95E–1 [chr18:62980832]  
omitted Genes: Slc27a6, Isoc1, A730017C20Rik  
omitted Genes: Smim3, Dctn4, Rbm22  
omitted Genes: Myoz3, Synpo, G630071F17Rik  
omitted Genes: Ndst1, Rps14, Cd74  
omitted Genes: Mir5107, Tcof1, Camk2a  
omitted Genes: Mir7220, Mir6982, Slc6a7  
omitted Genes: Csf1r, Mir6983, Hmgxb3  
omitted Genes: Slc26a2, Pde6a, Ppargc1b  
omitted Genes: A530050N04Rik, Arhgef37, Csnk1a1  
omitted Genes: Carmn, Mir145a, Mir143  
omitted Genes: Pcyox1l, Grpel2, 1500015A07Rik  
omitted Genes: Afap1l1, Sh3tc2, Spink10  
omitted Genes: Spink13, 2700046A07Rik, Piezo2  
omitted Genes: Onecut2, Atp8b1, Zfp532  
omitted Genes: Oacyl, Cplx4, Lman1  
omitted Genes: Mir694, Pmaip1, Gm9926  
omitted Genes: Mppe1, Impa2, B430212C06Rik  
omitted Genes: Cidea, Tubb6, Afg3l2  
omitted Genes: Slmo1, Spire1



Fine-mapping Regions

| snp            | chr | pos (Mb) | pp         | group        | color  |
|----------------|-----|----------|------------|--------------|--------|
| chr18:62609019 | 18  | 62.60902 | 0.31416088 | Credible Set | purple |
| chr18:62760743 | 18  | 62.76074 | 0.08133874 | Credible Set | purple |
| chr18:62780679 | 18  | 62.78068 | 0.08262774 | Credible Set | purple |
| chr18:62793979 | 18  | 62.79398 | 0.09517501 | Credible Set | purple |
| chr18:62801634 | 18  | 62.80163 | 0.10986009 | Credible Set | purple |
| chr18:62801661 | 18  | 62.80166 | 0.10986009 | Credible Set | purple |
| chr18:62937328 | 18  | 62.93733 | 0.01660355 | Credible Set | purple |
| chr18:62956832 | 18  | 62.95683 | 0.01167004 | Credible Set | purple |
| chr18:62956840 | 18  | 62.95684 | 0.01086881 | Credible Set | purple |
| chr18:63198665 | 18  | 63.19866 | 0.08343290 | Credible Set | purple |
| chr18:63204145 | 18  | 63.20414 | 0.08440215 | Credible Set | purple |

# F34 GBS, iron content in liver z score

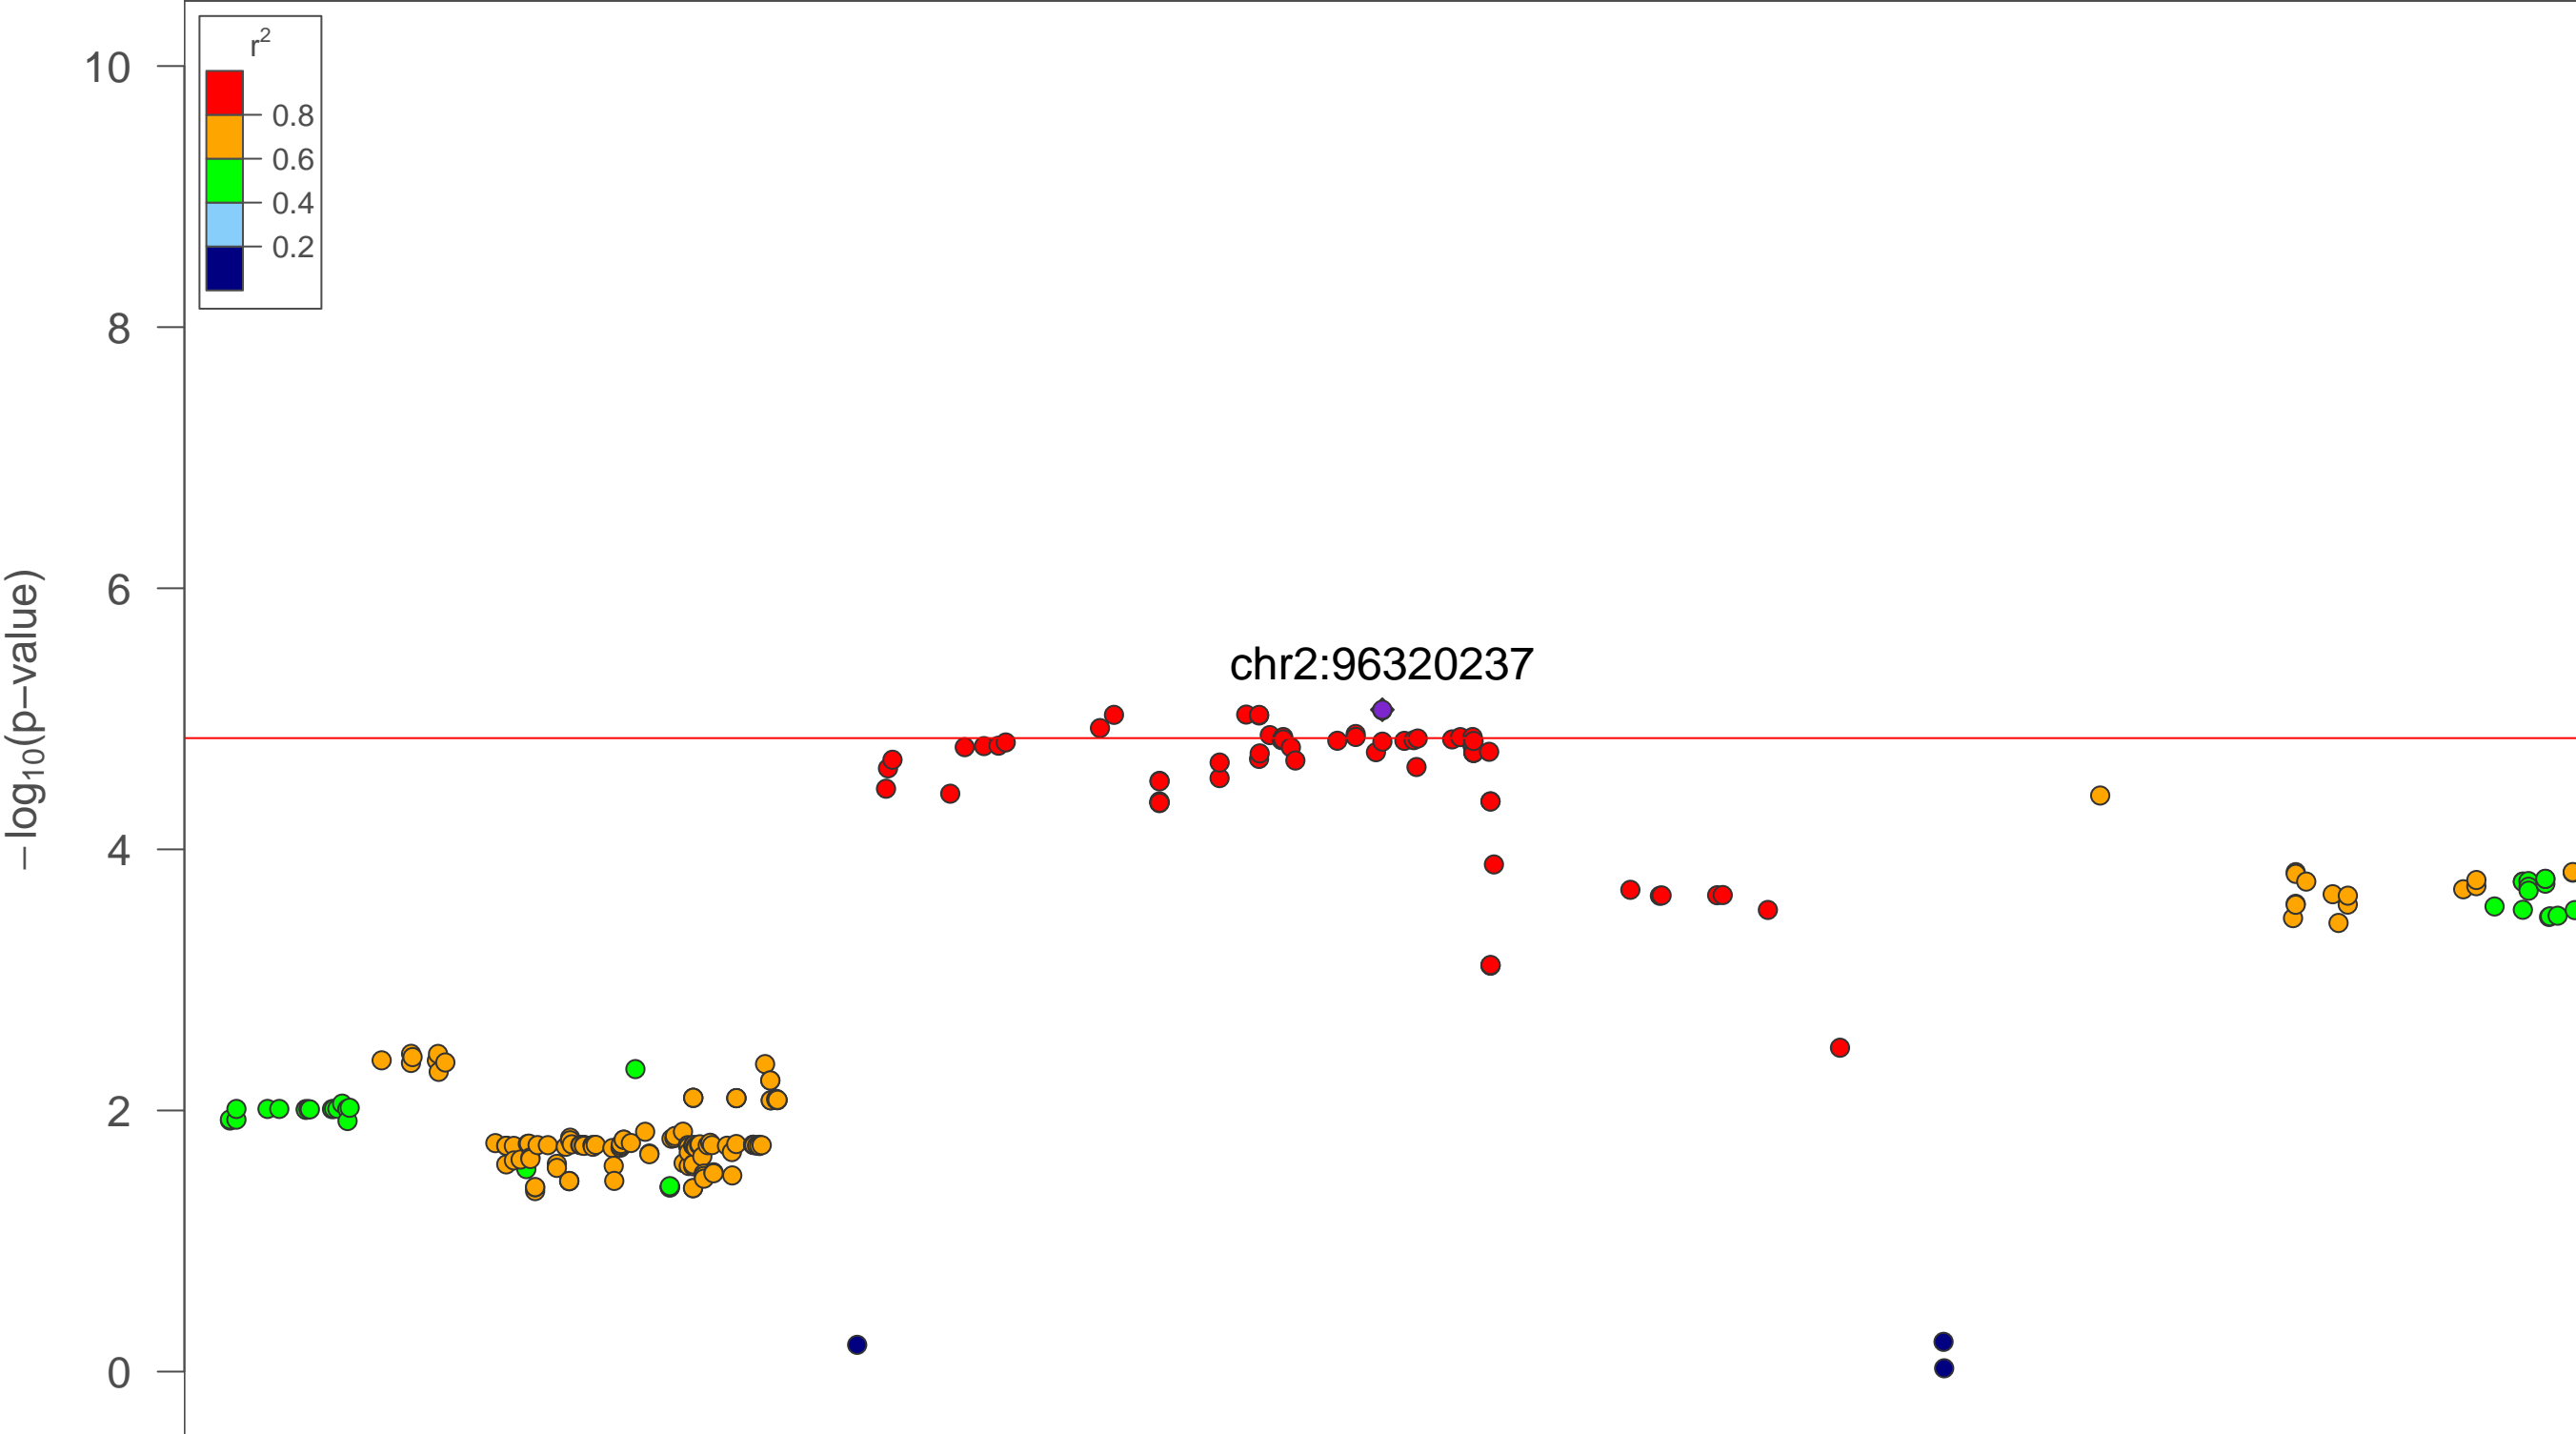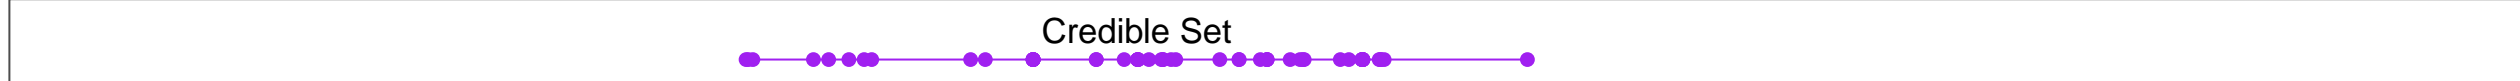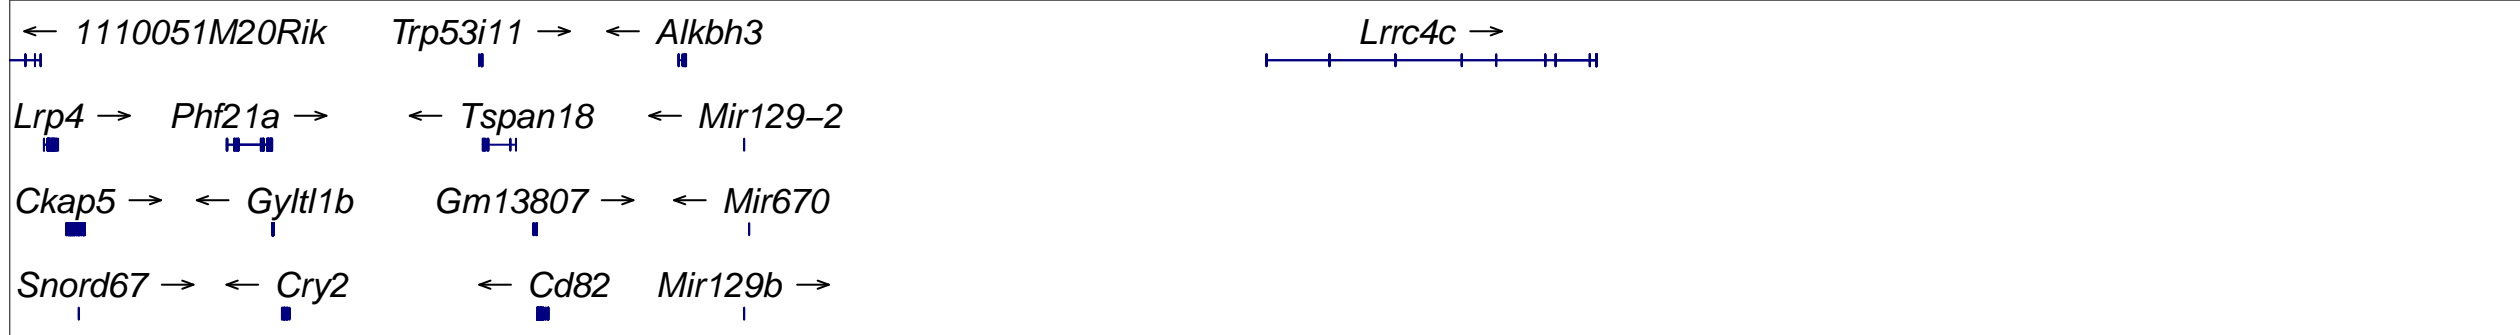

36 genes  
omitted

Position on chr2 (Mb)

date: Thu Oct 25 17:16:28 2018

build: F34GBS

display range: chr2:91320237–101320237 [91320237–101320237]

hilite range: 0 – 0 [ 0 – 0 ]

reference SNP: chr2:96320237

number of SNPs plotted: 236

min P-value: 8.52E–6 [chr2:96320237]

max P-value: 9.43E–1 [chr2:98665093]

omitted Genes: F2, Zfp408, Arhgap1

omitted Genes: Atg13, Harbi1, Ambra1

omitted Genes: Chrm4, Mdk, Dgkz

omitted Genes: Mir6999, Creb3l1, Mir1955

omitted Genes: Pex16, 1700029I15Rik, Mapk8ip1

omitted Genes: Mir7000, D930015M05Rik, Slc35c1

omitted Genes: Mir7221, Mir7222, Chst1

omitted Genes: Syt13, Prdm11, 4631405J19Rik

omitted Genes: Mir7001, Gm10804, Alx4

omitted Genes: Ext2, Accs, Accsl

omitted Genes: Gm13889, Alkbh3os1, Hsd17b12

omitted Genes: Ttc17, 2810002D19Rik, Api5

## Fine-mapping Regions

| snp           | chr | pos (Mb) | pp          | group        | color  |
|---------------|-----|----------|-------------|--------------|--------|
| chr2:94249122 | 2   | 94.24912 | 0.009345889 | Credible Set | purple |
| chr2:94257379 | 2   | 94.25738 | 0.013149298 | Credible Set | purple |
| chr2:94276010 | 2   | 94.27601 | 0.015190090 | Credible Set | purple |
| chr2:94516977 | 2   | 94.51698 | 0.008596523 | Credible Set | purple |
| chr2:94577500 | 2   | 94.57750 | 0.018768120 | Credible Set | purple |
| chr2:94657941 | 2   | 94.65794 | 0.019106526 | Credible Set | purple |
| chr2:94718556 | 2   | 94.71856 | 0.019232070 | Credible Set | purple |
| chr2:94748712 | 2   | 94.74871 | 0.020318937 | Credible Set | purple |
| chr2:95141904 | 2   | 95.14190 | 0.025871490 | Credible Set | purple |
| chr2:95200398 | 2   | 95.20040 | 0.032322327 | Credible Set | purple |
| chr2:95390243 | 2   | 95.39024 | 0.007488085 | Credible Set | purple |
| chr2:95390247 | 2   | 95.39025 | 0.007341922 | Credible Set | purple |
| chr2:95390277 | 2   | 95.39028 | 0.007556063 | Credible Set | purple |
| chr2:95390284 | 2   | 95.39028 | 0.007394122 | Credible Set | purple |
| chr2:95390546 | 2   | 95.39055 | 0.010663314 | Credible Set | purple |
| chr2:95390592 | 2   | 95.39059 | 0.010574691 | Credible Set | purple |
| chr2:95641124 | 2   | 95.64112 | 0.011159002 | Credible Set | purple |
| chr2:95641477 | 2   | 95.64148 | 0.014491530 | Credible Set | purple |
| chr2:95752277 | 2   | 95.75228 | 0.032479006 | Credible Set | purple |
| chr2:95805867 | 2   | 95.80587 | 0.015405704 | Credible Set | purple |
| chr2:95806028 | 2   | 95.80603 | 0.031965628 | Credible Set | purple |
| chr2:95806038 | 2   | 95.80604 | 0.032299024 | Credible Set | purple |
| chr2:95808603 | 2   | 95.80860 | 0.016903695 | Credible Set | purple |
| chr2:95850674 | 2   | 95.85067 | 0.022992151 | Credible Set | purple |
| chr2:95900229 | 2   | 95.90023 | 0.021113571 | Credible Set | purple |
| chr2:95906738 | 2   | 95.90674 | 0.022263063 | Credible Set | purple |
| chr2:95906783 | 2   | 95.90678 | 0.021372052 | Credible Set | purple |
| chr2:95938782 | 2   | 95.93878 | 0.018709679 | Credible Set | purple |
| chr2:95957448 | 2   | 95.95745 | 0.014994804 | Credible Set | purple |
| chr2:96132587 | 2   | 96.13259 | 0.020911104 | Credible Set | purple |
| chr2:96209134 | 2   | 96.20913 | 0.023419246 | Credible Set | purple |
| chr2:96209157 | 2   | 96.20916 | 0.022268999 | Credible Set | purple |
| chr2:96293855 | 2   | 96.29385 | 0.017241174 | Credible Set | purple |
| chr2:96320222 | 2   | 96.32022 | 0.034860342 | Credible Set | purple |
| chr2:96320237 | 2   | 96.32024 | 0.035235075 | Credible Set | purple |
| chr2:96320641 | 2   | 96.32064 | 0.020592921 | Credible Set | purple |

Fine-mapping Regions

| snp           | chr | pos (Mb) | pp          | group        | color  |
|---------------|-----|----------|-------------|--------------|--------|
| chr2:96412425 | 2   | 96.41242 | 0.020875290 | Credible Set | purple |
| chr2:96451438 | 2   | 96.45144 | 0.021113571 | Credible Set | purple |
| chr2:96462914 | 2   | 96.46291 | 0.013447390 | Credible Set | purple |
| chr2:96468064 | 2   | 96.46806 | 0.021712016 | Credible Set | purple |
| chr2:96611762 | 2   | 96.61176 | 0.021390367 | Credible Set | purple |
| chr2:96645727 | 2   | 96.64573 | 0.022222538 | Credible Set | purple |
| chr2:96697256 | 2   | 96.69726 | 0.022262601 | Credible Set | purple |
| chr2:96697871 | 2   | 96.69787 | 0.018980753 | Credible Set | purple |
| chr2:96697872 | 2   | 96.69787 | 0.019258598 | Credible Set | purple |
| chr2:96701045 | 2   | 96.70104 | 0.017070663 | Credible Set | purple |
| chr2:96701070 | 2   | 96.70107 | 0.017070663 | Credible Set | purple |
| chr2:96701077 | 2   | 96.70108 | 0.017070663 | Credible Set | purple |
| chr2:96701079 | 2   | 96.70108 | 0.017070663 | Credible Set | purple |
| chr2:96701166 | 2   | 96.70117 | 0.020818440 | Credible Set | purple |
| chr2:96766199 | 2   | 96.76620 | 0.017362363 | Credible Set | purple |
| chr2:96771761 | 2   | 96.77176 | 0.007564679 | Credible Set | purple |
| chr2:96771791 | 2   | 96.77179 | 0.007543133 | Credible Set | purple |
| chr2:96786046 | 2   | 96.78605 | 0.002639576 | Credible Set | purple |
| chr2:97355566 | 2   | 97.35557 | 0.001733072 | Credible Set | purple |

F34 GBS, iron content in liver z score

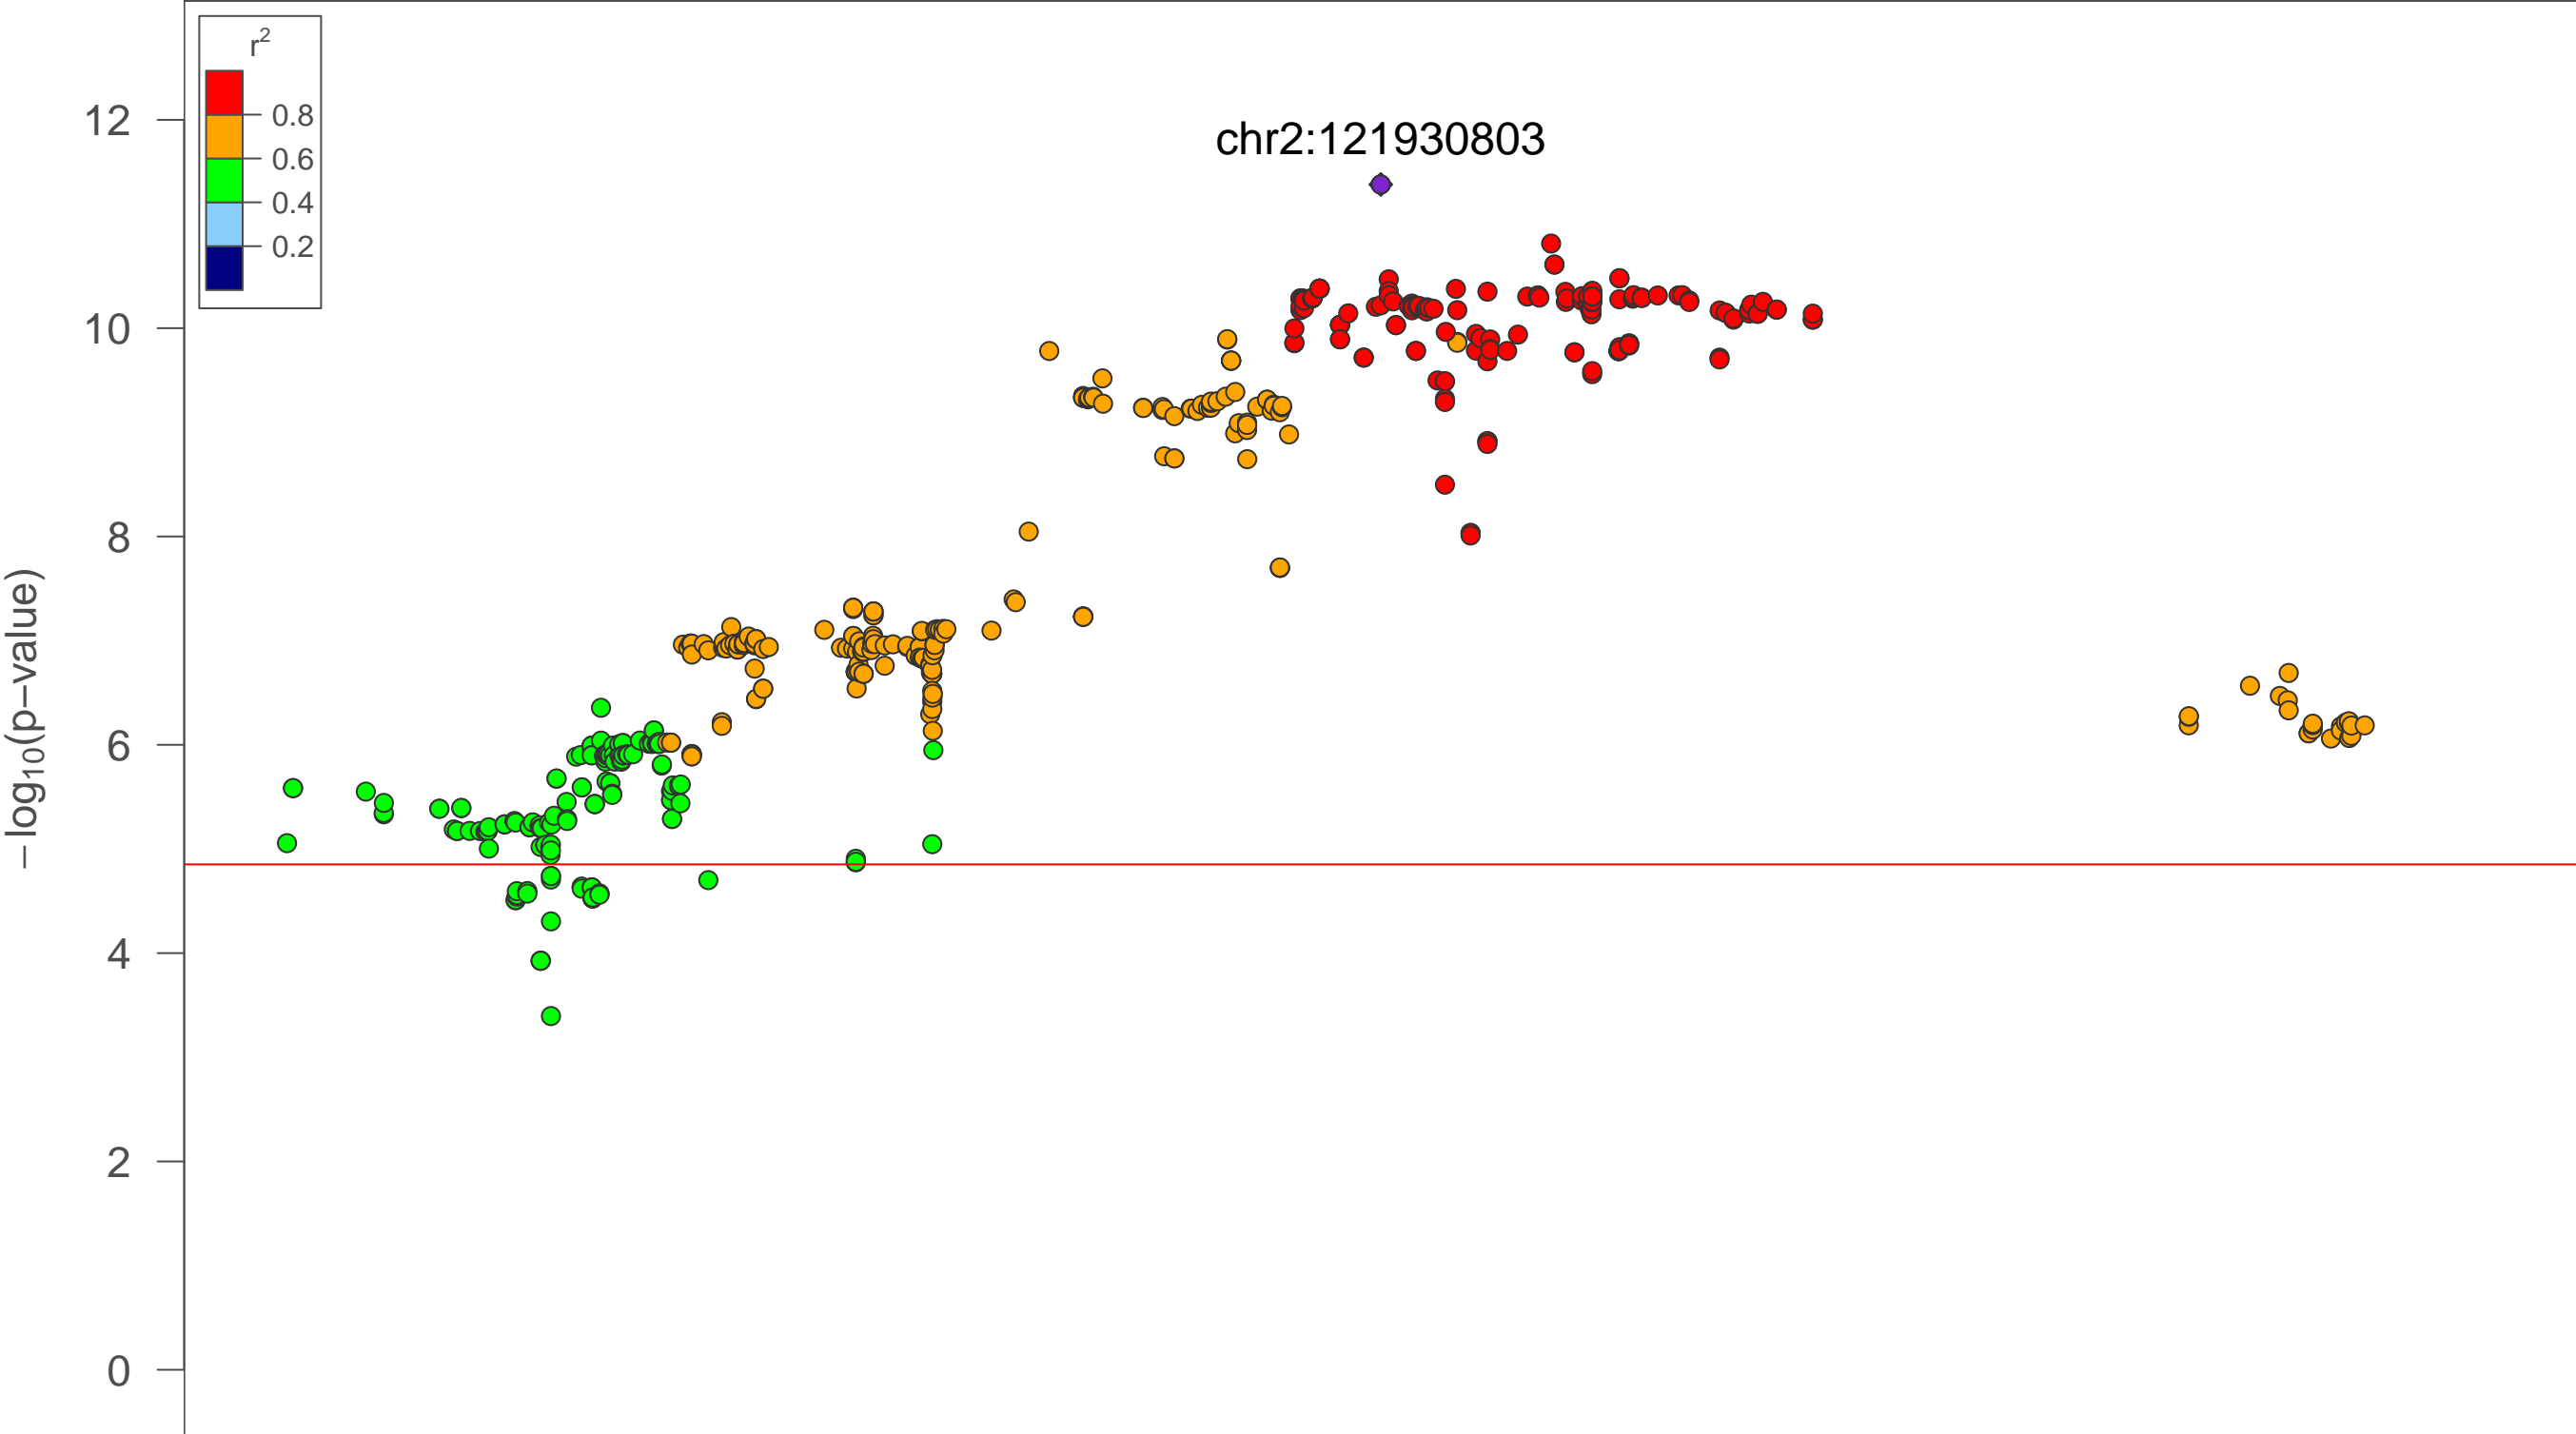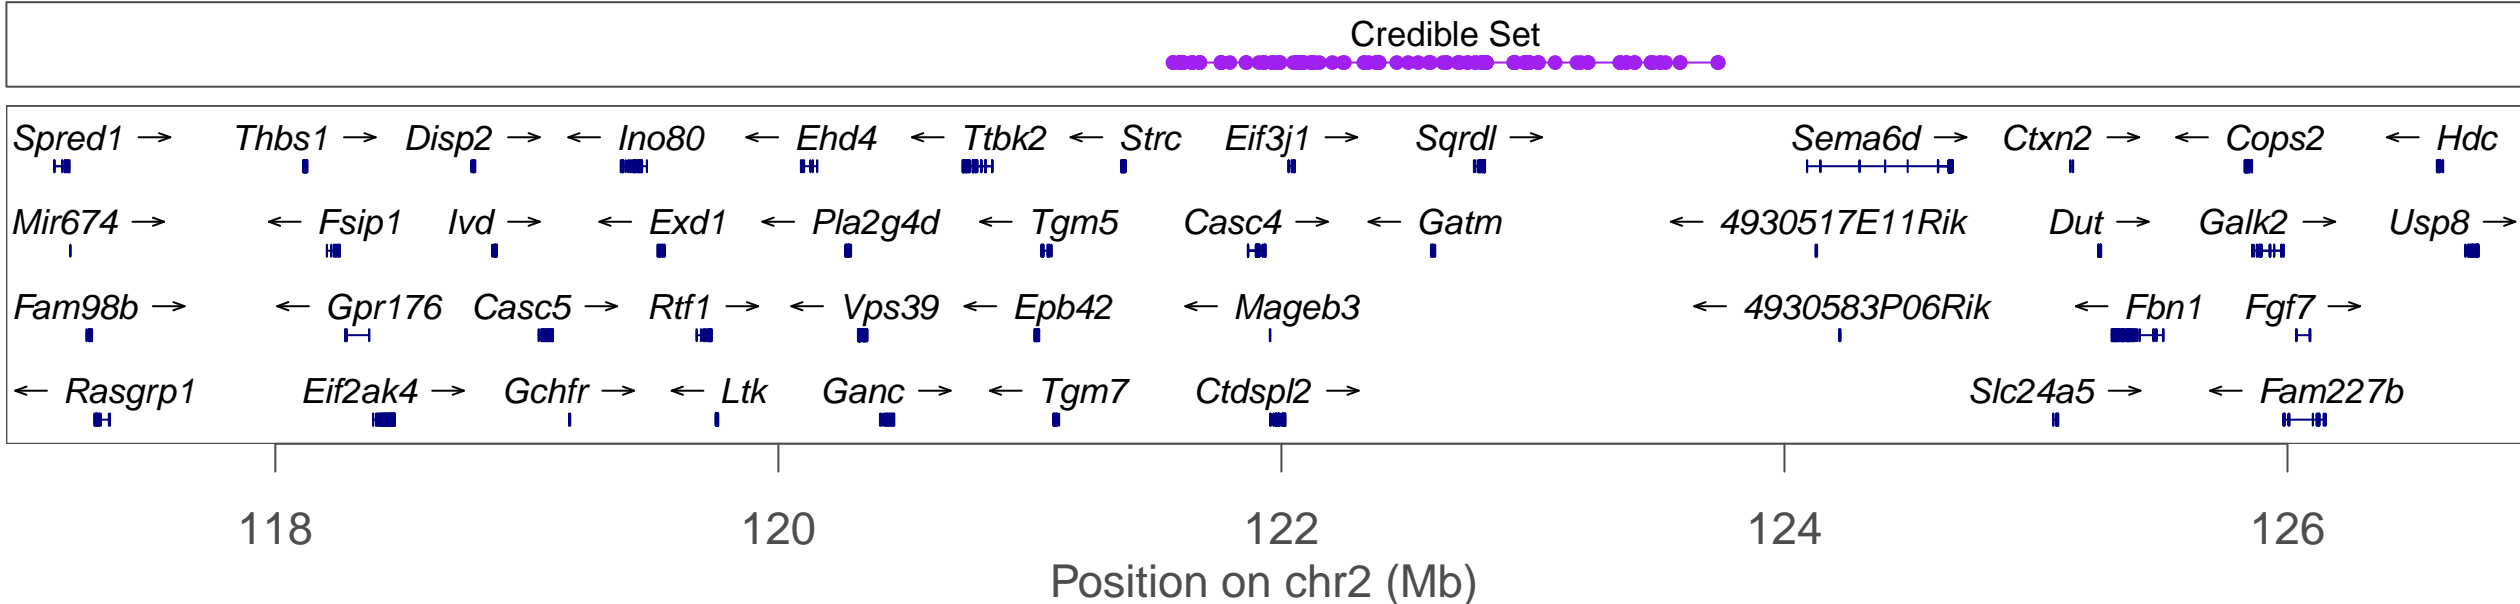

date: Thu Oct 25 17:16:19 2018

build: F34GBS

display range: chr2:116930803–126930803 [116930803–126930803]

hilite range: 0 – 0 [ 0 – 0 ]

reference SNP: chr2:121930803

number of SNPs plotted: 530

min P-value: 4.17E–12 [chr2:121930803]

max P-value: 4.02E–4 [chr2:118463923]

omitted Genes: Gm13985, 4930412B13Rik, Gm13986

omitted Genes: 1700054M17Rik, Srp14, Bmf

omitted Genes: Bub1b, Pak6, Ankrd63

omitted Genes: Plcb2, Inafm2, A430105I19Rik

omitted Genes: Phgr1, Knstrn, Bahd1

omitted Genes: Chst14, Ccdc32, Rpusd2

omitted Genes: Rad51, Rmdn3, Dnajc17

omitted Genes: Gm14137, Zfyve19, Ppp1r14d

omitted Genes: Spint1, Rhov, Vps18

omitted Genes: Gm14207, Dll4, Chac1

omitted Genes: Chp1, 1700020I14Rik, Oip5

omitted Genes: Nusap1, Ndufaf1, Itpka

omitted Genes: Rpap1, Tyro3, Mga

omitted Genes: Mapkbp1, Mir7665, Jmjd7

omitted Genes: Gm28042, Pla2g4b, Pla2g4e

omitted Genes: Pla2g4f, Tmem87a, 4931402G19Rik

omitted Genes: Capn3, Zfp106, Snap23

omitted Genes: Lrrc57, Haus2, Cdan1

omitted Genes: AV039307, Ubr1, Tmem62

omitted Genes: Ccndbp1, Lcmt2, Adal

omitted Genes: Zscan29, Tubgcp4, Trp53bp1

omitted Genes: Map1a, Ppip5k1, Ckmt1

omitted Genes: Catsper2, Pdia3, Eil3

omitted Genes: Serf2, Serinc4, Hypk

omitted Genes: Mfap1b, Mfap1a, Wdr76

omitted Genes: Frmd5, Spg11, Patl2

omitted Genes: B2m, Trim69, Terb2

omitted Genes: Sord, Duox2, Duoxa2

omitted Genes: Duoxa1, Duox1, Shf

omitted Genes: Slc28a2, Bambi-ps1, Gm14085

omitted Genes: Spata5l1, AA467197, Mir147

omitted Genes: Slc30a4, Blec1c6, Myof2

Make more plots at <http://csg.sph.umich.edu/locuszoom/>

## Fine-mapping Regions

| snp            | chr | pos (Mb) | pp          | group        | color  |
|----------------|-----|----------|-------------|--------------|--------|
| chr2:121569629 | 2   | 121.5696 | 0.002857489 | Credible Set | purple |
| chr2:121569951 | 2   | 121.5700 | 0.002888488 | Credible Set | purple |
| chr2:121570025 | 2   | 121.5700 | 0.003934945 | Credible Set | purple |
| chr2:121595218 | 2   | 121.5952 | 0.007532776 | Credible Set | purple |
| chr2:121595356 | 2   | 121.5954 | 0.007532776 | Credible Set | purple |
| chr2:121595424 | 2   | 121.5954 | 0.005848599 | Credible Set | purple |
| chr2:121595633 | 2   | 121.5956 | 0.006371258 | Credible Set | purple |
| chr2:121605090 | 2   | 121.6051 | 0.007532776 | Credible Set | purple |
| chr2:121605163 | 2   | 121.6052 | 0.007356642 | Credible Set | purple |
| chr2:121609496 | 2   | 121.6095 | 0.007385239 | Credible Set | purple |
| chr2:121609992 | 2   | 121.6100 | 0.006101736 | Credible Set | purple |
| chr2:121610054 | 2   | 121.6101 | 0.007184117 | Credible Set | purple |
| chr2:121644474 | 2   | 121.6445 | 0.007532776 | Credible Set | purple |
| chr2:121644502 | 2   | 121.6445 | 0.007532776 | Credible Set | purple |
| chr2:121647254 | 2   | 121.6473 | 0.007687139 | Credible Set | purple |
| chr2:121675210 | 2   | 121.6752 | 0.009304945 | Credible Set | purple |
| chr2:121675212 | 2   | 121.6752 | 0.009304945 | Credible Set | purple |
| chr2:121675249 | 2   | 121.6752 | 0.009304945 | Credible Set | purple |
| chr2:121675251 | 2   | 121.6753 | 0.009304945 | Credible Set | purple |
| chr2:121760589 | 2   | 121.7606 | 0.004252916 | Credible Set | purple |
| chr2:121760592 | 2   | 121.7606 | 0.004252916 | Credible Set | purple |
| chr2:121760608 | 2   | 121.7606 | 0.004252916 | Credible Set | purple |
| chr2:121760655 | 2   | 121.7607 | 0.003110863 | Credible Set | purple |
| chr2:121760675 | 2   | 121.7607 | 0.003110863 | Credible Set | purple |
| chr2:121795014 | 2   | 121.7950 | 0.005449237 | Credible Set | purple |
| chr2:121859536 | 2   | 121.8595 | 0.002099820 | Credible Set | purple |
| chr2:121859542 | 2   | 121.8595 | 0.002090902 | Credible Set | purple |
| chr2:121910457 | 2   | 121.9105 | 0.006283734 | Credible Set | purple |
| chr2:121930722 | 2   | 121.9307 | 0.006480551 | Credible Set | purple |
| chr2:121930803 | 2   | 121.9308 | 0.088633203 | Credible Set | purple |
| chr2:121930806 | 2   | 121.9308 | 0.088633203 | Credible Set | purple |
| chr2:121963958 | 2   | 121.9640 | 0.011392752 | Credible Set | purple |
| chr2:121964022 | 2   | 121.9640 | 0.008828939 | Credible Set | purple |
| chr2:121964577 | 2   | 121.9646 | 0.008056022 | Credible Set | purple |
| chr2:121982399 | 2   | 121.9824 | 0.007056880 | Credible Set | purple |
| chr2:121994315 | 2   | 121.9943 | 0.004227053 | Credible Set | purple |



## Fine-mapping Regions

| snp            | chr | pos (Mb) | pp          | group        | color  |
|----------------|-----|----------|-------------|--------------|--------|
| chr2:121994324 | 2   | 121.9943 | 0.004227053 | Credible Set | purple |
| chr2:122047663 | 2   | 122.0477 | 0.006414192 | Credible Set | purple |
| chr2:122060688 | 2   | 122.0607 | 0.006732340 | Credible Set | purple |
| chr2:122061099 | 2   | 122.0611 | 0.005826115 | Credible Set | purple |
| chr2:122065787 | 2   | 122.0658 | 0.006442917 | Credible Set | purple |
| chr2:122065870 | 2   | 122.0659 | 0.006208577 | Credible Set | purple |
| chr2:122077766 | 2   | 122.0778 | 0.002419555 | Credible Set | purple |
| chr2:122077798 | 2   | 122.0778 | 0.002419555 | Credible Set | purple |
| chr2:122083136 | 2   | 122.0831 | 0.006330985 | Credible Set | purple |
| chr2:122090229 | 2   | 122.0902 | 0.006403112 | Credible Set | purple |
| chr2:122115252 | 2   | 122.1153 | 0.005833033 | Credible Set | purple |
| chr2:122122941 | 2   | 122.1229 | 0.005667775 | Credible Set | purple |
| chr2:122123313 | 2   | 122.1233 | 0.006215054 | Credible Set | purple |
| chr2:122132763 | 2   | 122.1328 | 0.006096369 | Credible Set | purple |
| chr2:122151119 | 2   | 122.1511 | 0.006015879 | Credible Set | purple |
| chr2:122202473 | 2   | 122.2025 | 0.003651499 | Credible Set | purple |
| chr2:122244672 | 2   | 122.2447 | 0.009251758 | Credible Set | purple |
| chr2:122250299 | 2   | 122.2503 | 0.005837905 | Credible Set | purple |
| chr2:122328643 | 2   | 122.3286 | 0.002437696 | Credible Set | purple |
| chr2:122328650 | 2   | 122.3286 | 0.003494080 | Credible Set | purple |
| chr2:122346906 | 2   | 122.3469 | 0.003192585 | Credible Set | purple |
| chr2:122376352 | 2   | 122.3764 | 0.001934156 | Credible Set | purple |
| chr2:122376463 | 2   | 122.3765 | 0.008709426 | Credible Set | purple |
| chr2:122387979 | 2   | 122.3880 | 0.003101788 | Credible Set | purple |
| chr2:122388097 | 2   | 122.3881 | 0.002523569 | Credible Set | purple |
| chr2:122388208 | 2   | 122.3882 | 0.002469119 | Credible Set | purple |
| chr2:122458764 | 2   | 122.4588 | 0.002420198 | Credible Set | purple |
| chr2:122504055 | 2   | 122.5041 | 0.003442057 | Credible Set | purple |
| chr2:122542898 | 2   | 122.5429 | 0.007834508 | Credible Set | purple |
| chr2:122587284 | 2   | 122.5873 | 0.008038345 | Credible Set | purple |
| chr2:122587743 | 2   | 122.5877 | 0.008006825 | Credible Set | purple |
| chr2:122593432 | 2   | 122.5934 | 0.007658566 | Credible Set | purple |
| chr2:122642503 | 2   | 122.6425 | 0.024688407 | Credible Set | purple |
| chr2:122656435 | 2   | 122.6564 | 0.015653215 | Credible Set | purple |
| chr2:122656458 | 2   | 122.6565 | 0.015653215 | Credible Set | purple |
| chr2:122702118 | 2   | 122.7021 | 0.008676101 | Credible Set | purple |

## Fine-mapping Regions

| snp            | chr | pos (Mb) | pp          | group        | color  |
|----------------|-----|----------|-------------|--------------|--------|
| chr2:122704152 | 2   | 122.7042 | 0.006983921 | Credible Set | purple |
| chr2:122708239 | 2   | 122.7082 | 0.007532776 | Credible Set | purple |
| chr2:122739988 | 2   | 122.7400 | 0.002346524 | Credible Set | purple |
| chr2:122740035 | 2   | 122.7400 | 0.002349438 | Credible Set | purple |
| chr2:122771056 | 2   | 122.7711 | 0.007171837 | Credible Set | purple |
| chr2:122771465 | 2   | 122.7715 | 0.007902549 | Credible Set | purple |
| chr2:122797192 | 2   | 122.7972 | 0.006787411 | Credible Set | purple |
| chr2:122797216 | 2   | 122.7972 | 0.006731594 | Credible Set | purple |
| chr2:122797265 | 2   | 122.7973 | 0.007873788 | Credible Set | purple |
| chr2:122797266 | 2   | 122.7973 | 0.007886566 | Credible Set | purple |
| chr2:122804433 | 2   | 122.8044 | 0.005962276 | Credible Set | purple |
| chr2:122811212 | 2   | 122.8112 | 0.005339439 | Credible Set | purple |
| chr2:122811304 | 2   | 122.8113 | 0.005928817 | Credible Set | purple |
| chr2:122814314 | 2   | 122.8143 | 0.008469307 | Credible Set | purple |
| chr2:122814326 | 2   | 122.8143 | 0.006895917 | Credible Set | purple |
| chr2:122814381 | 2   | 122.8144 | 0.007027315 | Credible Set | purple |
| chr2:122814728 | 2   | 122.8147 | 0.008880280 | Credible Set | purple |
| chr2:122814902 | 2   | 122.8149 | 0.007838651 | Credible Set | purple |
| chr2:122814909 | 2   | 122.8149 | 0.007851767 | Credible Set | purple |
| chr2:122924669 | 2   | 122.9247 | 0.002412749 | Credible Set | purple |
| chr2:122924685 | 2   | 122.9247 | 0.002421077 | Credible Set | purple |
| chr2:122924695 | 2   | 122.9247 | 0.002412749 | Credible Set | purple |
| chr2:122924696 | 2   | 122.9247 | 0.002412749 | Credible Set | purple |
| chr2:122927536 | 2   | 122.9275 | 0.007386738 | Credible Set | purple |
| chr2:122927903 | 2   | 122.9279 | 0.011619776 | Credible Set | purple |
| chr2:122927980 | 2   | 122.9280 | 0.011677971 | Credible Set | purple |
| chr2:122927997 | 2   | 122.9280 | 0.002624947 | Credible Set | purple |
| chr2:122928025 | 2   | 122.9280 | 0.002461347 | Credible Set | purple |
| chr2:122968234 | 2   | 122.9682 | 0.002820595 | Credible Set | purple |
| chr2:122968260 | 2   | 122.9683 | 0.002855143 | Credible Set | purple |
| chr2:122968275 | 2   | 122.9683 | 0.002718756 | Credible Set | purple |
| chr2:122968296 | 2   | 122.9683 | 0.002763713 | Credible Set | purple |
| chr2:122983867 | 2   | 122.9839 | 0.007483440 | Credible Set | purple |
| chr2:122986477 | 2   | 122.9865 | 0.007648956 | Credible Set | purple |
| chr2:122986971 | 2   | 122.9870 | 0.008076340 | Credible Set | purple |
| chr2:123021071 | 2   | 123.0211 | 0.007626697 | Credible Set | purple |

## Fine-mapping Regions

| snp            | chr | pos (Mb) | pp          | group        | color  |
|----------------|-----|----------|-------------|--------------|--------|
| chr2:123021090 | 2   | 123.0211 | 0.007647626 | Credible Set | purple |
| chr2:123021532 | 2   | 123.0215 | 0.007610671 | Credible Set | purple |
| chr2:123088225 | 2   | 123.0882 | 0.008023564 | Credible Set | purple |
| chr2:123175096 | 2   | 123.1751 | 0.008038758 | Credible Set | purple |
| chr2:123190496 | 2   | 123.1905 | 0.008073418 | Credible Set | purple |
| chr2:123219436 | 2   | 123.2194 | 0.007202137 | Credible Set | purple |
| chr2:123219468 | 2   | 123.2195 | 0.006968850 | Credible Set | purple |
| chr2:123346239 | 2   | 123.3462 | 0.002094342 | Credible Set | purple |
| chr2:123346253 | 2   | 123.3463 | 0.002015733 | Credible Set | purple |
| chr2:123346704 | 2   | 123.3467 | 0.005800515 | Credible Set | purple |
| chr2:123371857 | 2   | 123.3719 | 0.005505525 | Credible Set | purple |
| chr2:123371991 | 2   | 123.3720 | 0.005505525 | Credible Set | purple |
| chr2:123404160 | 2   | 123.4042 | 0.004761916 | Credible Set | purple |
| chr2:123404632 | 2   | 123.4046 | 0.004880475 | Credible Set | purple |
| chr2:123470044 | 2   | 123.4700 | 0.005432790 | Credible Set | purple |
| chr2:123470368 | 2   | 123.4704 | 0.005852956 | Credible Set | purple |
| chr2:123470382 | 2   | 123.4704 | 0.005867645 | Credible Set | purple |
| chr2:123478720 | 2   | 123.4787 | 0.006578271 | Credible Set | purple |
| chr2:123505482 | 2   | 123.5055 | 0.005411790 | Credible Set | purple |
| chr2:123505557 | 2   | 123.5056 | 0.005391510 | Credible Set | purple |
| chr2:123527223 | 2   | 123.5272 | 0.006990985 | Credible Set | purple |
| chr2:123584403 | 2   | 123.5844 | 0.005907269 | Credible Set | purple |
| chr2:123585516 | 2   | 123.5855 | 0.005911792 | Credible Set | purple |
| chr2:123735848 | 2   | 123.7358 | 0.004751842 | Credible Set | purple |
| chr2:123735871 | 2   | 123.7359 | 0.004766643 | Credible Set | purple |
| chr2:123735958 | 2   | 123.7360 | 0.005416055 | Credible Set | purple |

# F34 GBS, iron content in liver z score

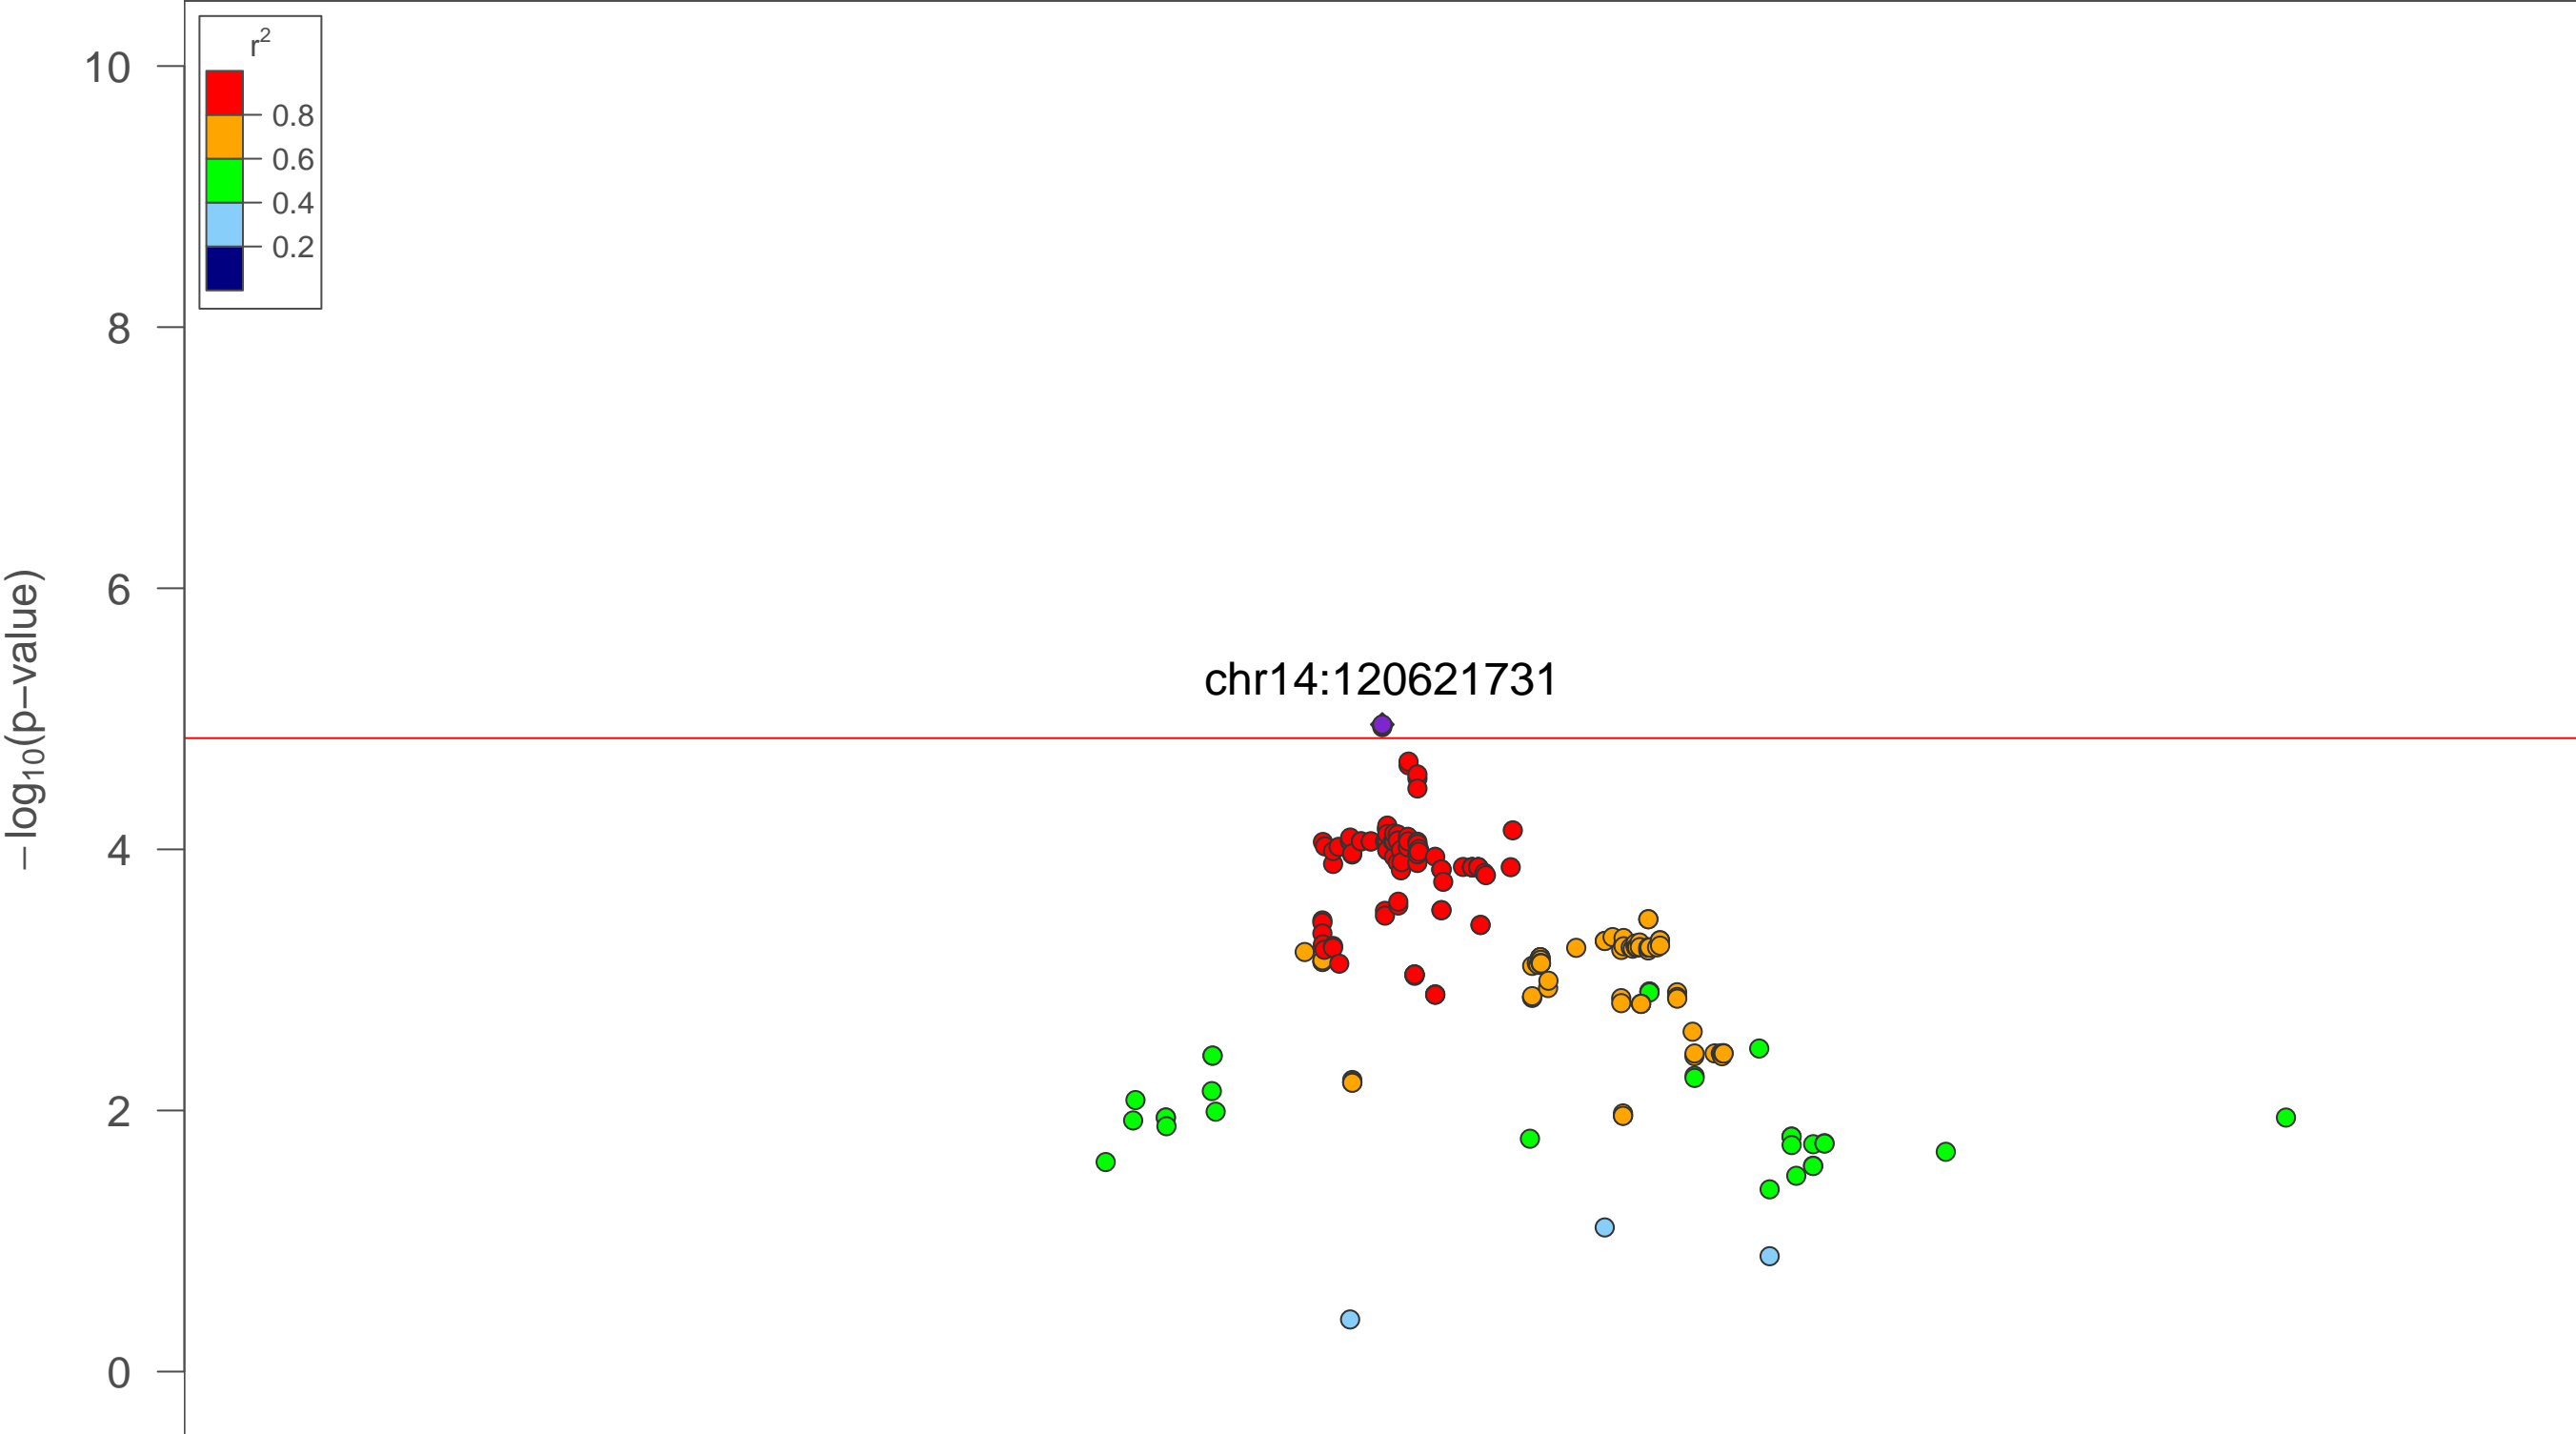

Credible Set



19 genes  
omitted

116

118

120

122

124

Position on chr14 (Mb)

date: Thu Oct 25 17:15:59 2018

build: F34GBS

display range: chr14:115621731–125621731 [115621731–125621731]

hilite range: 0 – 0 [ 0 – 0 ]

reference SNP: chr14:120621731

number of SNPs plotted: 206

min P-value: 1.11E–5 [chr14:120621731]

max P-value: 3.98E–1 [chr14:120487423]

omitted Genes: Gpr180, Sox21, LOC105245869

omitted Genes: Mir6241, Gm9376, 1700044C05Rik

omitted Genes: Mir6391, Ugg2, 1700006F04Rik

omitted Genes: 1810041H14Rik, Gpr18, Gpr183

omitted Genes: Timm8a2, A330035P11Rik, 1700108J01Rik

omitted Genes: Gm5089, 2610035F20Rik, Zic2

omitted Genes: AA536875

## Fine-mapping Regions

| snp             | chr | pos (Mb) | pp          | group        | color  |
|-----------------|-----|----------|-------------|--------------|--------|
| chr14:120371692 | 14  | 120.3717 | 0.002717539 | Credible Set | purple |
| chr14:120371706 | 14  | 120.3717 | 0.002619874 | Credible Set | purple |
| chr14:120371729 | 14  | 120.3717 | 0.002193366 | Credible Set | purple |
| chr14:120373900 | 14  | 120.3739 | 0.009981640 | Credible Set | purple |
| chr14:120374171 | 14  | 120.3742 | 0.001788578 | Credible Set | purple |
| chr14:120374181 | 14  | 120.3742 | 0.001833904 | Credible Set | purple |
| chr14:120379882 | 14  | 120.3799 | 0.001675364 | Credible Set | purple |
| chr14:120382338 | 14  | 120.3823 | 0.009276992 | Credible Set | purple |
| chr14:120416102 | 14  | 120.4161 | 0.001784302 | Credible Set | purple |
| chr14:120416136 | 14  | 120.4161 | 0.001732416 | Credible Set | purple |
| chr14:120416333 | 14  | 120.4163 | 0.006921214 | Credible Set | purple |
| chr14:120416347 | 14  | 120.4163 | 0.008575546 | Credible Set | purple |
| chr14:120439342 | 14  | 120.4393 | 0.009203875 | Credible Set | purple |
| chr14:120487392 | 14  | 120.4874 | 0.010131800 | Credible Set | purple |
| chr14:120487416 | 14  | 120.4874 | 0.010123622 | Credible Set | purple |
| chr14:120487566 | 14  | 120.4876 | 0.010123622 | Credible Set | purple |
| chr14:120487639 | 14  | 120.4876 | 0.010750502 | Credible Set | purple |
| chr14:120495956 | 14  | 120.4960 | 0.008102774 | Credible Set | purple |
| chr14:120495976 | 14  | 120.4960 | 0.008247406 | Credible Set | purple |
| chr14:120532718 | 14  | 120.5327 | 0.010089466 | Credible Set | purple |
| chr14:120532740 | 14  | 120.5327 | 0.010089466 | Credible Set | purple |
| chr14:120573821 | 14  | 120.5738 | 0.010060872 | Credible Set | purple |
| chr14:120573951 | 14  | 120.5740 | 0.010089466 | Credible Set | purple |
| chr14:120621718 | 14  | 120.6217 | 0.068360725 | Credible Set | purple |
| chr14:120621731 | 14  | 120.6217 | 0.071436539 | Credible Set | purple |
| chr14:120621749 | 14  | 120.6217 | 0.070173723 | Credible Set | purple |
| chr14:120632852 | 14  | 120.6329 | 0.003183660 | Credible Set | purple |
| chr14:120632882 | 14  | 120.6329 | 0.002939877 | Credible Set | purple |
| chr14:120633549 | 14  | 120.6335 | 0.010089466 | Credible Set | purple |
| chr14:120641466 | 14  | 120.6415 | 0.012419721 | Credible Set | purple |
| chr14:120641472 | 14  | 120.6415 | 0.012419721 | Credible Set | purple |
| chr14:120641546 | 14  | 120.6415 | 0.010089466 | Credible Set | purple |
| chr14:120642644 | 14  | 120.6426 | 0.013126447 | Credible Set | purple |
| chr14:120642688 | 14  | 120.6427 | 0.011413870 | Credible Set | purple |
| chr14:120642702 | 14  | 120.6427 | 0.008687413 | Credible Set | purple |
| chr14:120642723 | 14  | 120.6427 | 0.008687413 | Credible Set | purple |

## Fine-mapping Regions

| snp             | chr | pos (Mb) | pp          | group        | color  |
|-----------------|-----|----------|-------------|--------------|--------|
| chr14:120665611 | 14  | 120.6656 | 0.010089466 | Credible Set | purple |
| chr14:120670727 | 14  | 120.6707 | 0.007788504 | Credible Set | purple |
| chr14:120671083 | 14  | 120.6711 | 0.010089466 | Credible Set | purple |
| chr14:120671092 | 14  | 120.6711 | 0.010089466 | Credible Set | purple |
| chr14:120671147 | 14  | 120.6711 | 0.010089466 | Credible Set | purple |
| chr14:120671180 | 14  | 120.6712 | 0.011455704 | Credible Set | purple |
| chr14:120671181 | 14  | 120.6712 | 0.011486631 | Credible Set | purple |
| chr14:120686008 | 14  | 120.6860 | 0.007088228 | Credible Set | purple |
| chr14:120686112 | 14  | 120.6861 | 0.011316934 | Credible Set | purple |
| chr14:120686362 | 14  | 120.6864 | 0.010234701 | Credible Set | purple |
| chr14:120686413 | 14  | 120.6864 | 0.010201053 | Credible Set | purple |
| chr14:120688462 | 14  | 120.6885 | 0.003473863 | Credible Set | purple |
| chr14:120688492 | 14  | 120.6885 | 0.003703304 | Credible Set | purple |
| chr14:120699639 | 14  | 120.6996 | 0.006226111 | Credible Set | purple |
| chr14:120699675 | 14  | 120.6997 | 0.008755304 | Credible Set | purple |
| chr14:120702426 | 14  | 120.7024 | 0.007134272 | Credible Set | purple |
| chr14:120728333 | 14  | 120.7283 | 0.010881628 | Credible Set | purple |
| chr14:120728361 | 14  | 120.7284 | 0.009139025 | Credible Set | purple |
| chr14:120730072 | 14  | 120.7301 | 0.010089466 | Credible Set | purple |
| chr14:120731135 | 14  | 120.7311 | 0.035957368 | Credible Set | purple |
| chr14:120731136 | 14  | 120.7311 | 0.038301247 | Credible Set | purple |
| chr14:120767991 | 14  | 120.7680 | 0.010028215 | Credible Set | purple |
| chr14:120768037 | 14  | 120.7680 | 0.007032670 | Credible Set | purple |
| chr14:120768301 | 14  | 120.7683 | 0.028774894 | Credible Set | purple |
| chr14:120768336 | 14  | 120.7683 | 0.030890411 | Credible Set | purple |
| chr14:120768349 | 14  | 120.7683 | 0.024382310 | Credible Set | purple |
| chr14:120768705 | 14  | 120.7687 | 0.009643288 | Credible Set | purple |
| chr14:120768743 | 14  | 120.7687 | 0.008240744 | Credible Set | purple |
| chr14:120768819 | 14  | 120.7688 | 0.008134422 | Credible Set | purple |
| chr14:120774259 | 14  | 120.7743 | 0.008671610 | Credible Set | purple |
| chr14:120774290 | 14  | 120.7743 | 0.008888689 | Credible Set | purple |
| chr14:120774318 | 14  | 120.7743 | 0.008465055 | Credible Set | purple |
| chr14:120842399 | 14  | 120.8424 | 0.007803704 | Credible Set | purple |
| chr14:120868390 | 14  | 120.8684 | 0.006284490 | Credible Set | purple |
| chr14:120868527 | 14  | 120.8685 | 0.006321294 | Credible Set | purple |
| chr14:120868538 | 14  | 120.8685 | 0.006321294 | Credible Set | purple |

Fine-mapping Regions

| snp             | chr | pos (Mb) | pp          | group        | color  |
|-----------------|-----|----------|-------------|--------------|--------|
| chr14:120868670 | 14  | 120.8687 | 0.003218845 | Credible Set | purple |
| chr14:120868693 | 14  | 120.8687 | 0.003218845 | Credible Set | purple |
| chr14:120875959 | 14  | 120.8760 | 0.005142616 | Credible Set | purple |
| chr14:120958410 | 14  | 120.9584 | 0.006586249 | Credible Set | purple |
| chr14:120996497 | 14  | 120.9965 | 0.006559802 | Credible Set | purple |
| chr14:120996551 | 14  | 120.9966 | 0.006559802 | Credible Set | purple |
| chr14:120996555 | 14  | 120.9966 | 0.006559802 | Credible Set | purple |
| chr14:120996573 | 14  | 120.9966 | 0.006559802 | Credible Set | purple |
| chr14:121021982 | 14  | 121.0220 | 0.006559802 | Credible Set | purple |
| chr14:121022009 | 14  | 121.0220 | 0.006559802 | Credible Set | purple |
| chr14:121022048 | 14  | 121.0220 | 0.006559802 | Credible Set | purple |
| chr14:121022050 | 14  | 121.0220 | 0.006559802 | Credible Set | purple |
| chr14:121031640 | 14  | 121.0316 | 0.002521834 | Credible Set | purple |
| chr14:121031672 | 14  | 121.0317 | 0.002521834 | Credible Set | purple |
| chr14:121047713 | 14  | 121.0477 | 0.005965178 | Credible Set | purple |
| chr14:121054065 | 14  | 121.0541 | 0.005742071 | Credible Set | purple |
| chr14:121157624 | 14  | 121.1576 | 0.006559802 | Credible Set | purple |
| chr14:121166355 | 14  | 121.1664 | 0.012117052 | Credible Set | purple |



# F34 GBS, iron content in liver z score

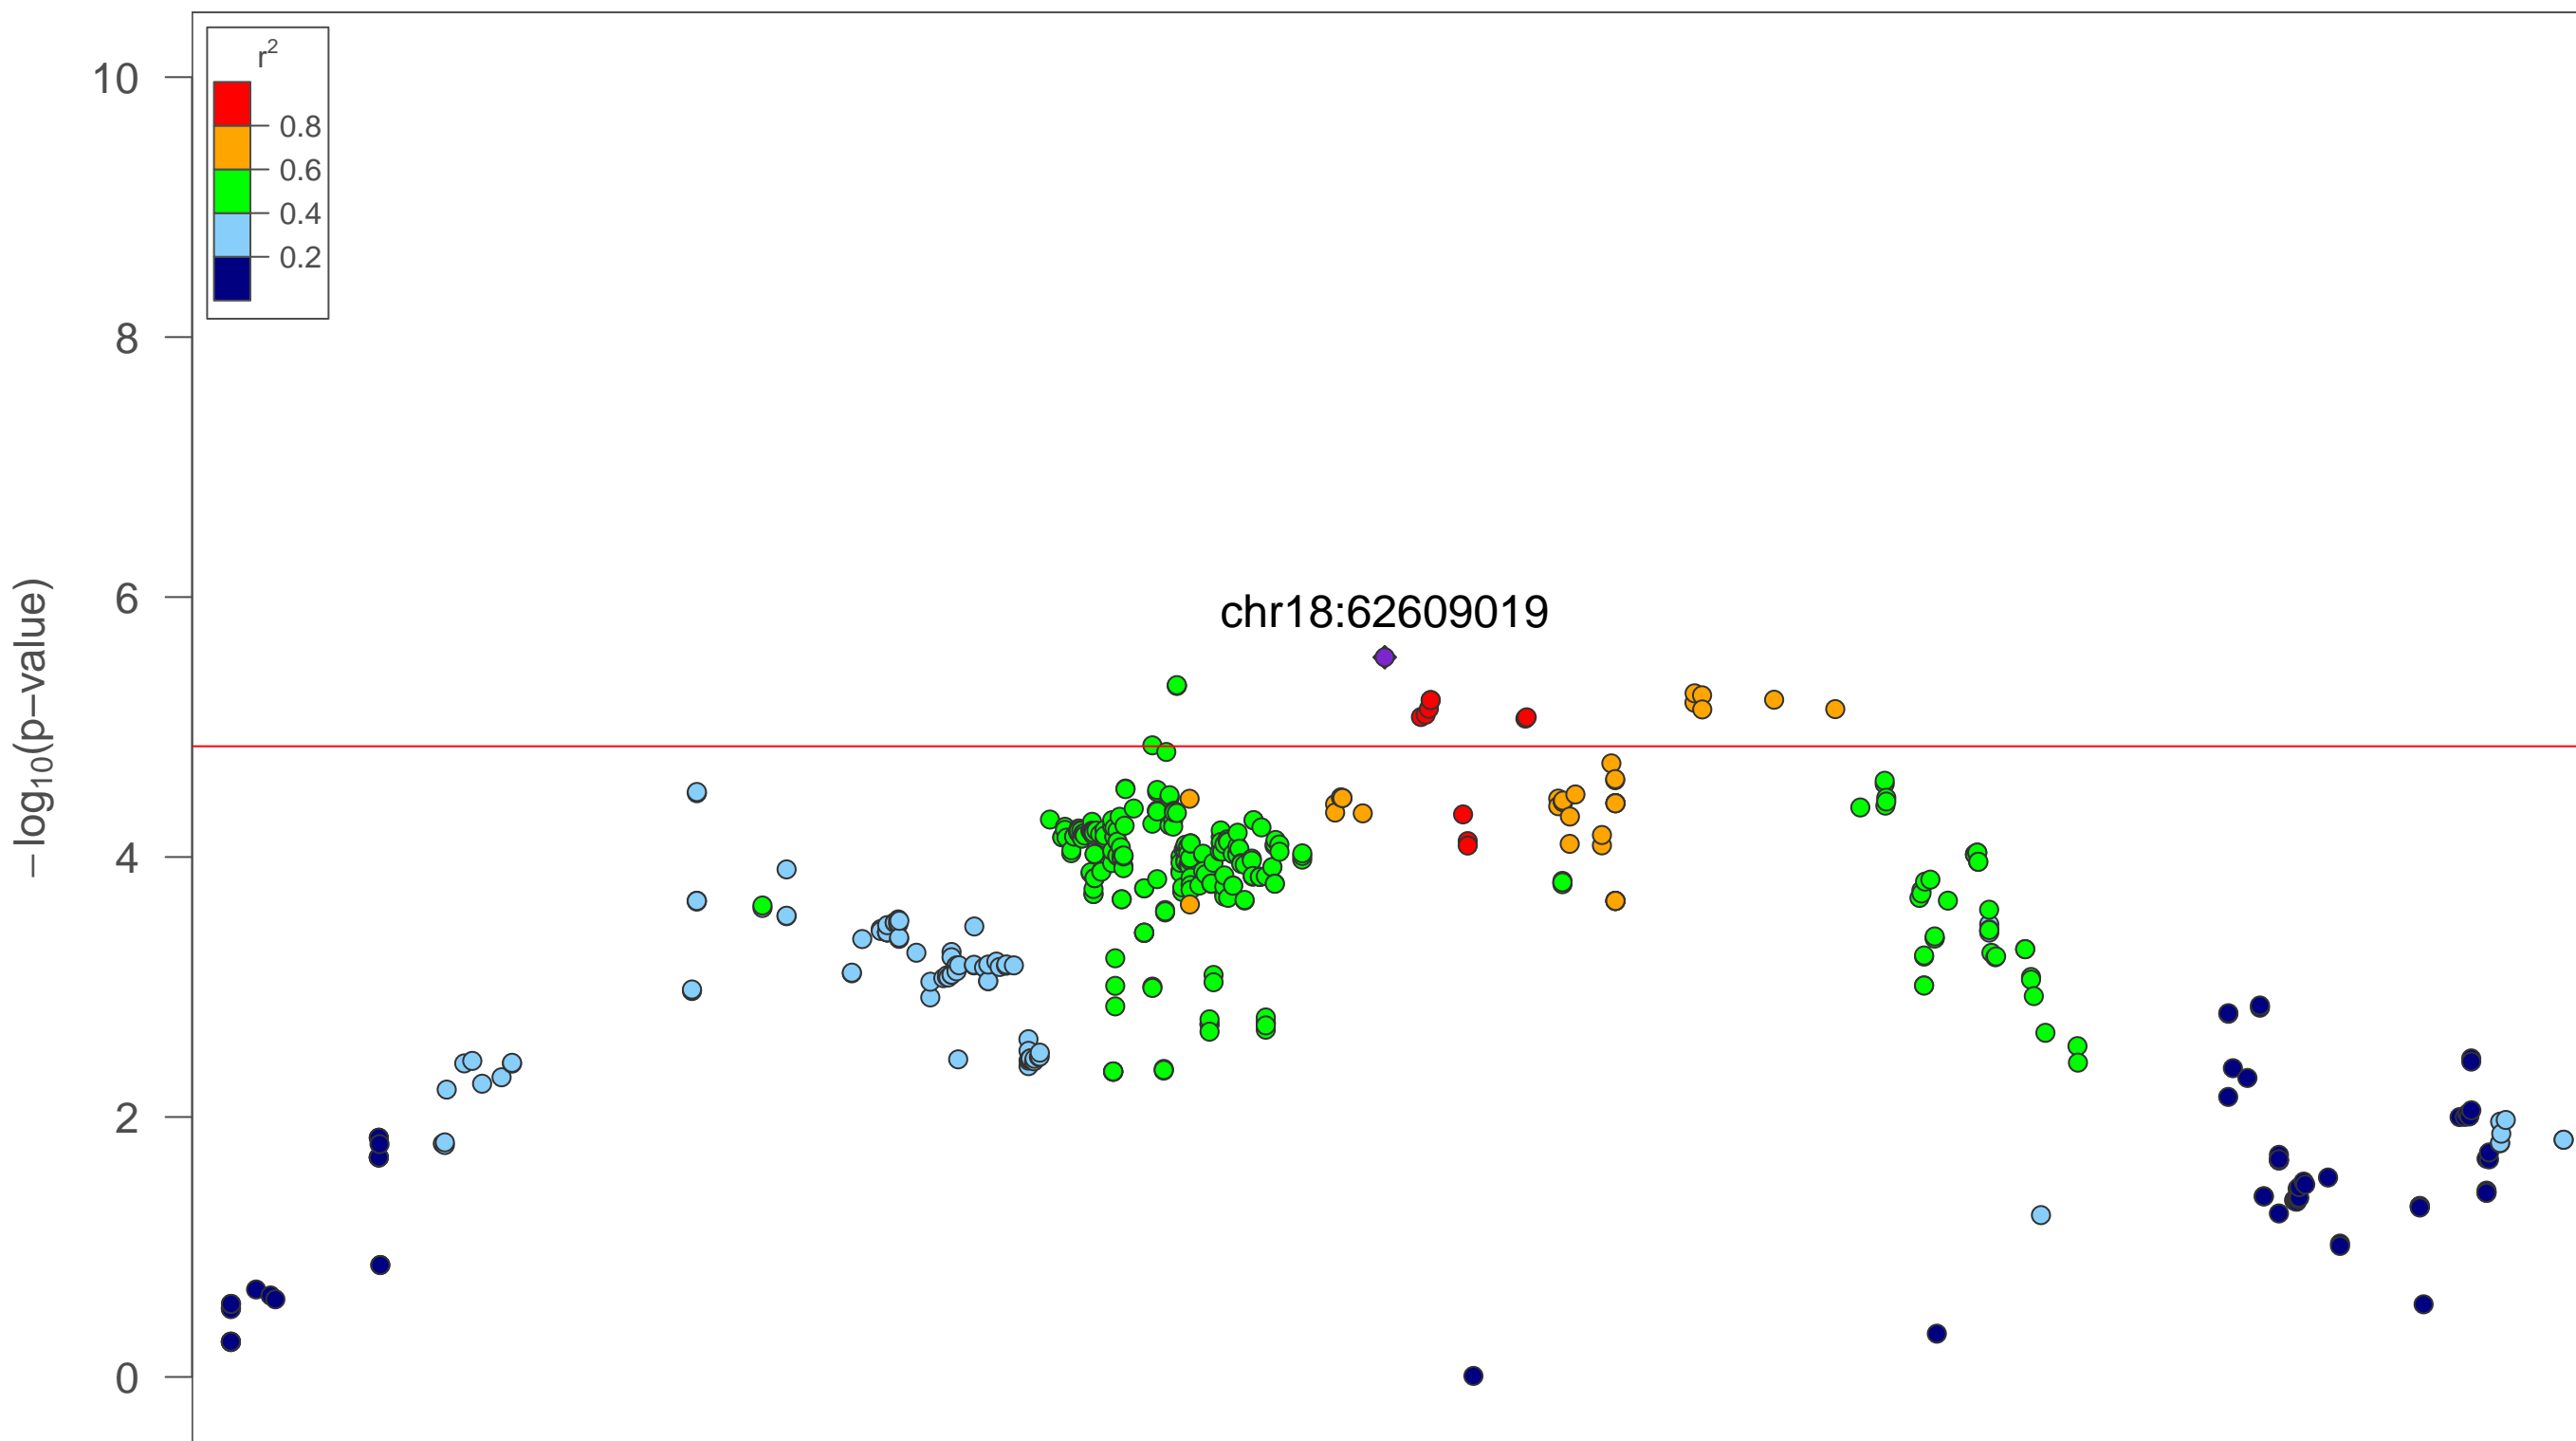

Credible Set

1700011I03Rik → Chsy3 → Gm4951 → Arsi → Bvht → Htr4 → Napg → ← Txnl1 ← Fech Mir122 → Grp → ← Mc4r  
← 2210409D07Rik Mir6355 → ligp1 → ← Cdx1 Il17b → ← Fbxo38 Wdr7 → ← Nars ← Alpk2 ← Rax ← Gm19784  
Slc12a2 → Adamts19 → ← Gm4841 Pdgfrb → ← Ablim3 ← Spink7 ← St8sia3os Nedd4l → Sec11c → Gnal →  
← Fbn2 F830016B08Rik → ← Mir378a ← Adrb2 Apcdd1 → St8sia3 → Malt1 → ← Ccbe1 Chmp1b →

56 genes  
omitted

Position on chr18 (Mb)

date: Thu Oct 25 17:16:09 2018  
build: F34GBS  
display range: chr18:57609019–67609019 [57609019–67609019]  
hilite range: 0 – 0 [ 0 – 0 ]  
reference SNP: chr18:62609019  
number of SNPs plotted: 481  
min P-value: 2.9E–6 [chr18:62609019]  
max P-value: 9.81E–1 [chr18:62980832]  
omitted Genes: Slc27a6, Isoc1, A730017C20Rik  
omitted Genes: Smim3, Dctn4, Rbm22  
omitted Genes: Myoz3, Synpo, G630071F17Rik  
omitted Genes: Ndst1, Rps14, Cd74  
omitted Genes: Mir5107, Tcof1, Camk2a  
omitted Genes: Mir7220, Mir6982, Slc6a7  
omitted Genes: Csf1r, Mir6983, Hmgxb3  
omitted Genes: Slc26a2, Pde6a, Ppargc1b  
omitted Genes: A530050N04Rik, Arhgef37, Csnk1a1  
omitted Genes: Carmn, Mir145a, Mir143  
omitted Genes: Pcyox1l, Grpel2, 1500015A07Rik  
omitted Genes: Afap1l1, Sh3tc2, Spink10  
omitted Genes: Spink13, 2700046A07Rik, Piezo2  
omitted Genes: Onecut2, Atp8b1, Zfp532  
omitted Genes: Oacyl, Cplx4, Lman1  
omitted Genes: Mir694, Pmaip1, Gm9926  
omitted Genes: Mppe1, Impa2, B430212C06Rik  
omitted Genes: Cidea, Tubb6, Afg3l2  
omitted Genes: Slmo1, Spire1

Fine-mapping Regions

| snp            | chr | pos (Mb) | pp         | group        | color  |
|----------------|-----|----------|------------|--------------|--------|
| chr18:62609019 | 18  | 62.60902 | 0.25031263 | Credible Set | purple |
| chr18:62760743 | 18  | 62.76074 | 0.09083502 | Credible Set | purple |
| chr18:62780679 | 18  | 62.78068 | 0.09443162 | Credible Set | purple |
| chr18:62793979 | 18  | 62.79398 | 0.10439724 | Credible Set | purple |
| chr18:62801634 | 18  | 62.80163 | 0.12100760 | Credible Set | purple |
| chr18:62801661 | 18  | 62.80166 | 0.12100760 | Credible Set | purple |
| chr18:62937328 | 18  | 62.93733 | 0.01757442 | Credible Set | purple |
| chr18:62956832 | 18  | 62.95683 | 0.01123247 | Credible Set | purple |
| chr18:62956840 | 18  | 62.95684 | 0.01041890 | Credible Set | purple |
| chr18:63198665 | 18  | 63.19866 | 0.08841425 | Credible Set | purple |
| chr18:63204145 | 18  | 63.20414 | 0.09036824 | Credible Set | purple |

F34 GBS, iron content in spleen

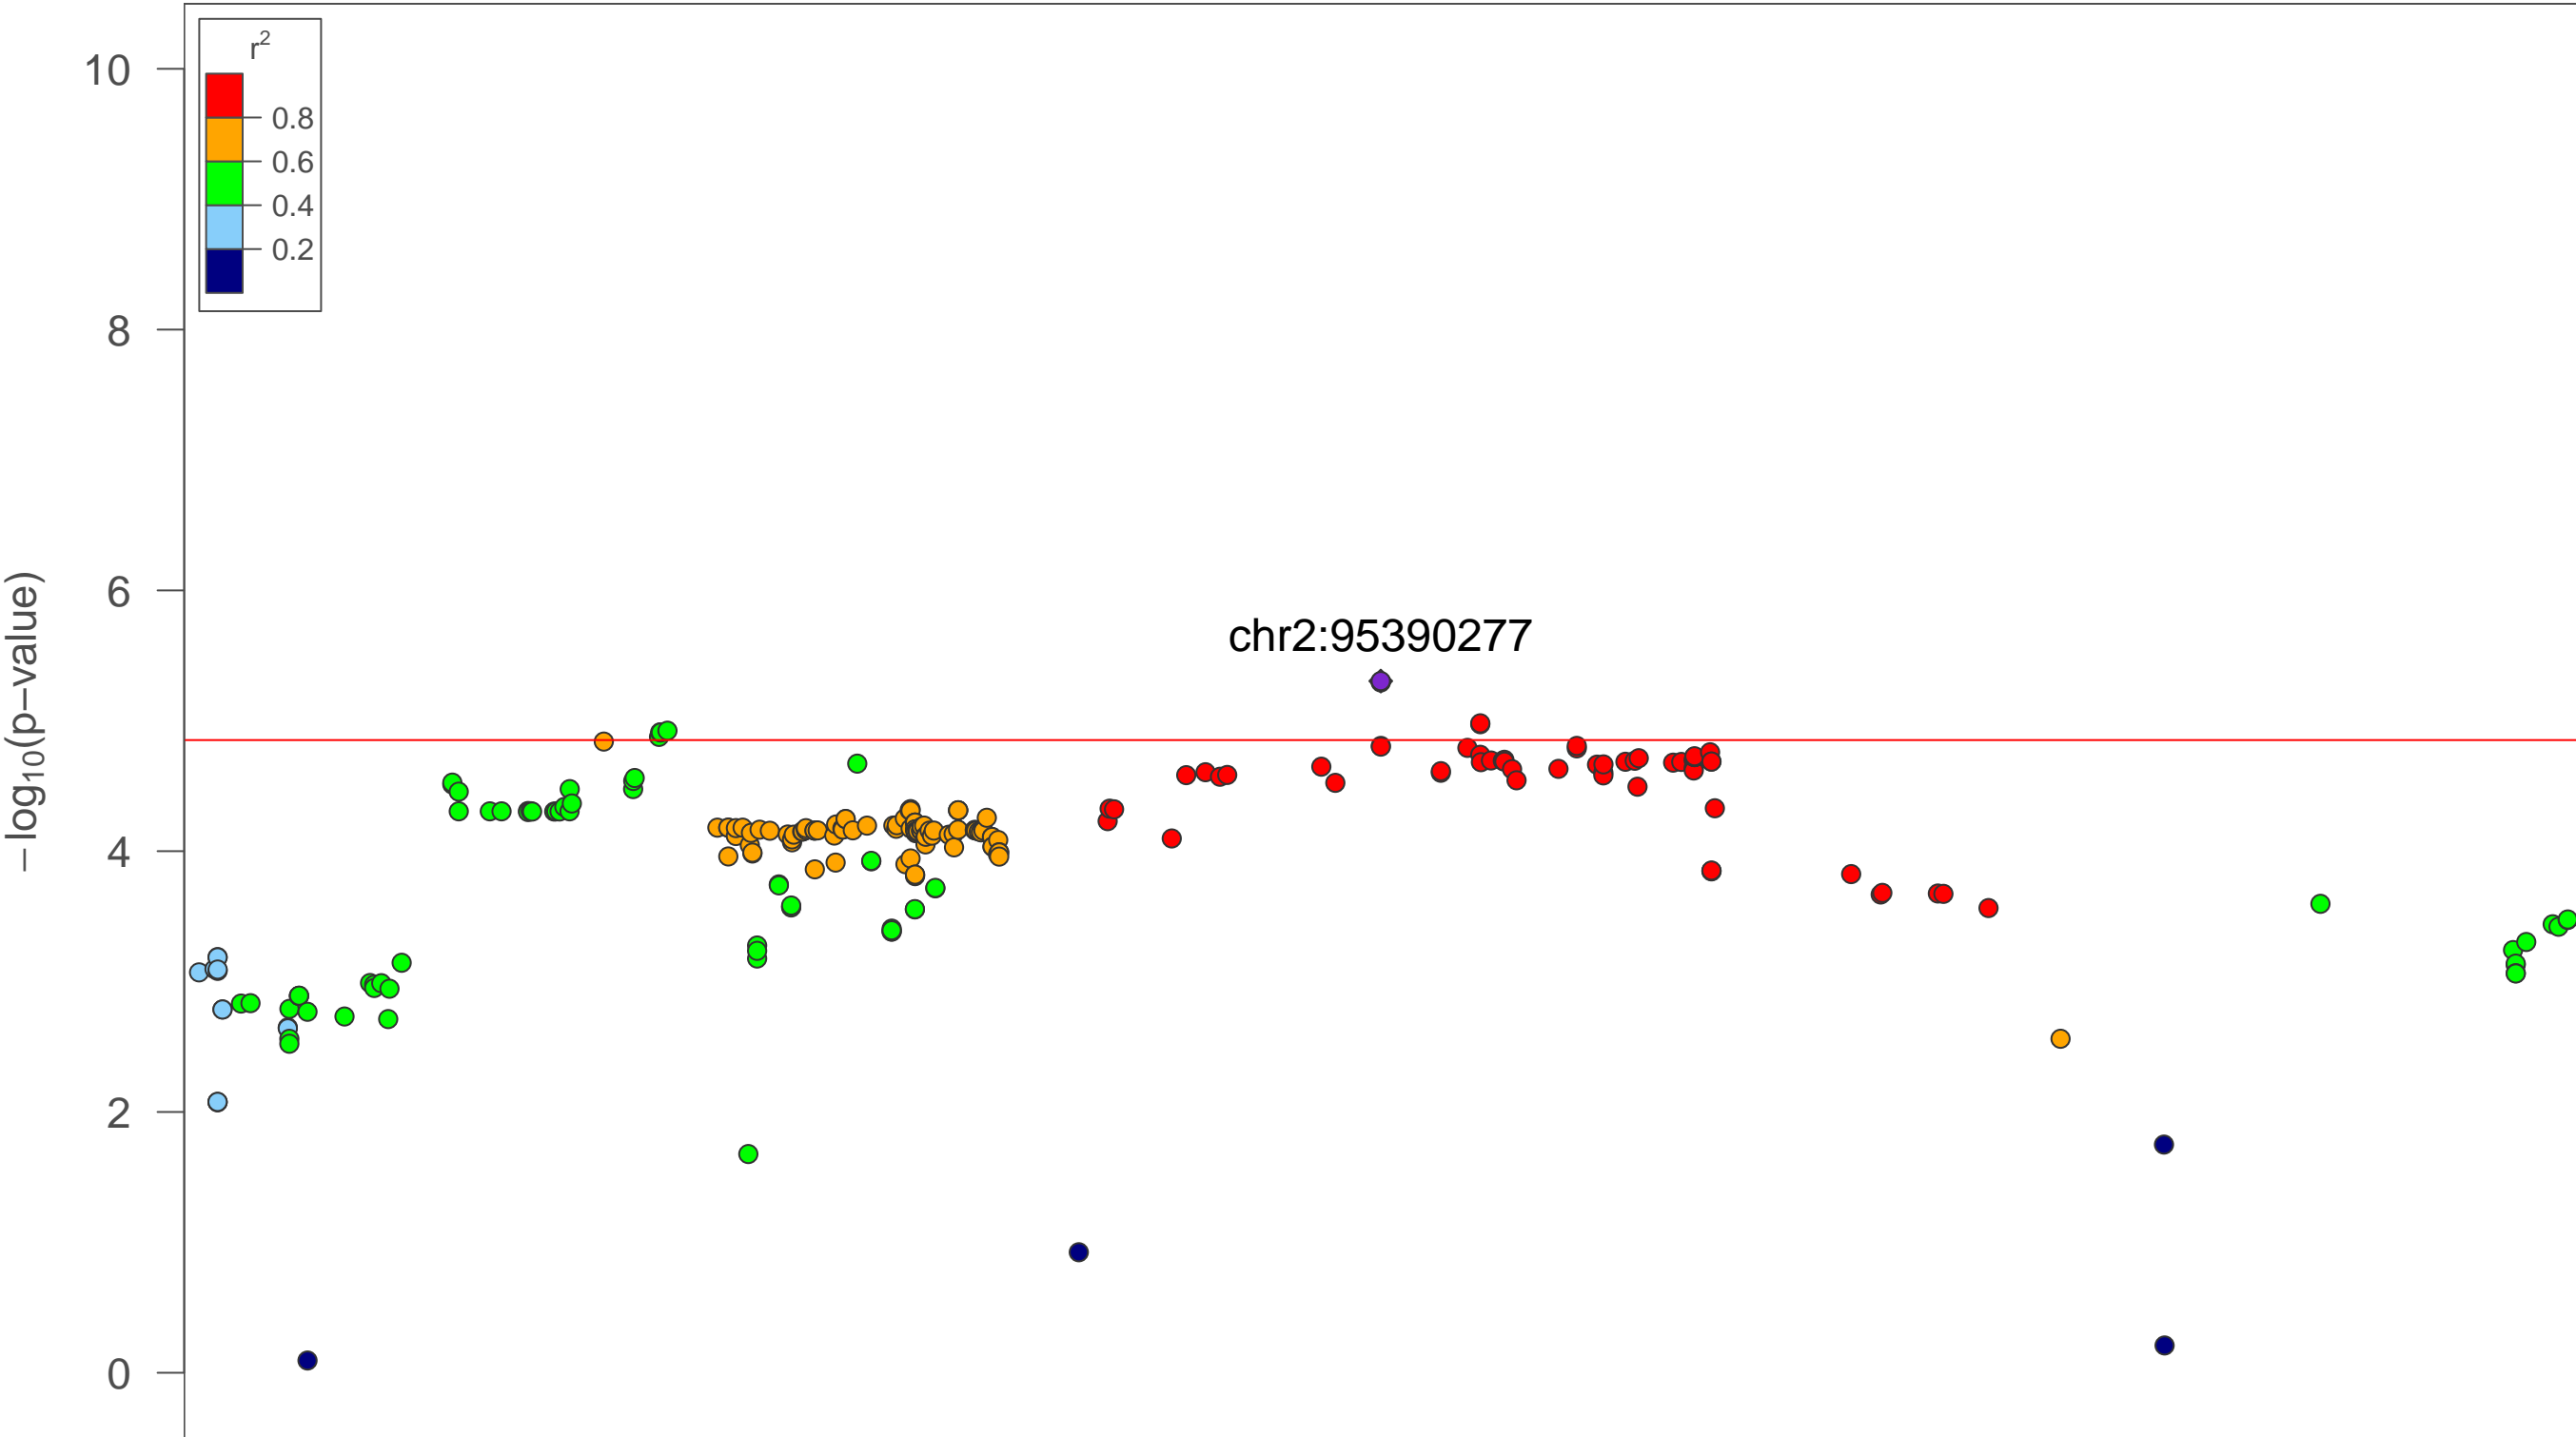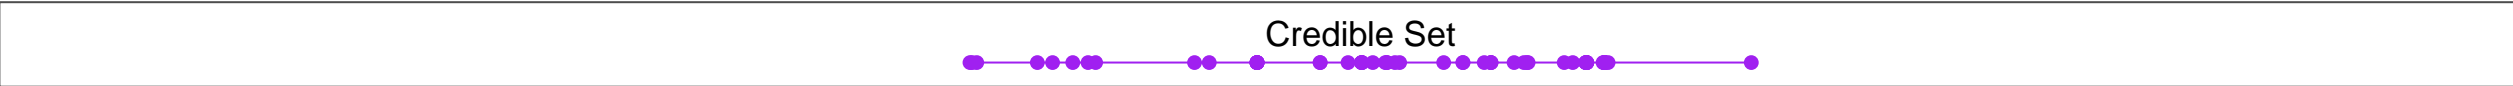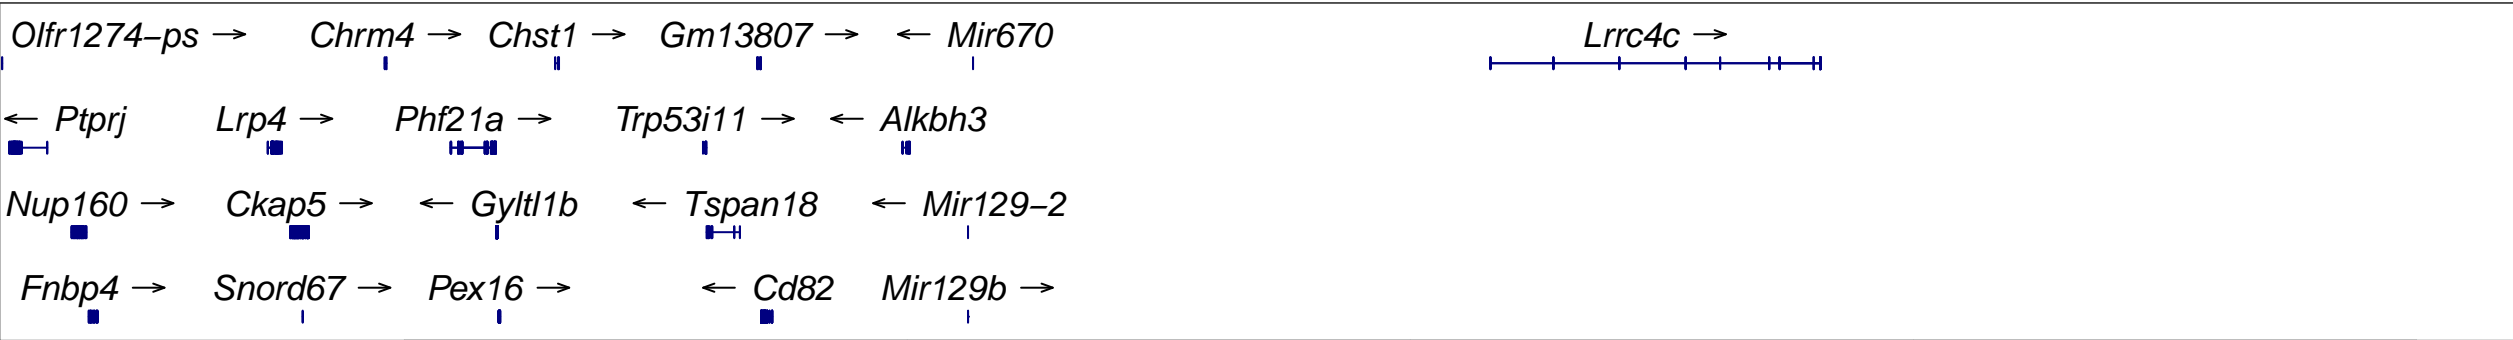

54 genes  
omitted

Position on chr2 (Mb)

date: Thu Oct 25 17:16:48 2018  
build: F34GBS  
display range: chr2:90390277–100390277 [90390277–100390277]  
hilite range: 0 – 0 [ 0 – 0 ]  
reference SNP: chr2:95390277  
number of SNPs plotted: 248  
min P-value: 4.96E–6 [chr2:95390277]  
max P-value: 8.05E–1 [chr2:90906135]  
omitted Genes: Agbl2, Mtch2, C1qtnf4  
omitted Genes: Ndufs3, Kbtbd4, Ptpmt1  
omitted Genes: Celf1, Rapsn, Psmc3  
omitted Genes: Slc39a13, Spi1, Mybpc3  
omitted Genes: Madd, Nr1h3, Acp2  
omitted Genes: Ddb2, A330069E16Rik, Pacsin3  
omitted Genes: Arfgap2, 1110051M20Rik, F2  
omitted Genes: Zfp408, Arhgap1, Atg13  
omitted Genes: Harbi1, Ambra1, Mdk  
omitted Genes: Dgkz, Mir6999, Creb3l1  
omitted Genes: Mir1955, 1700029I15Rik, Mapk8ip1  
omitted Genes: Mir7000, Cry2, D930015M05Rik  
omitted Genes: Slc35c1, Mir7221, Mir7222  
omitted Genes: Syt13, Prdm11, 4631405J19Rik  
omitted Genes: Mir7001, Gm10804, Alx4  
omitted Genes: Ext2, Accs, Accsl  
omitted Genes: Gm13889, Alkbh3os1, Hsd17b12  
omitted Genes: Ttc17, 2810002D19Rik, Api5

## Fine-mapping Regions

| snp           | chr | pos (Mb) | pp          | group        | color  |
|---------------|-----|----------|-------------|--------------|--------|
| chr2:94249122 | 2   | 94.24912 | 0.005706935 | Credible Set | purple |
| chr2:94257379 | 2   | 94.25738 | 0.007037982 | Credible Set | purple |
| chr2:94276010 | 2   | 94.27601 | 0.006959189 | Credible Set | purple |
| chr2:94516977 | 2   | 94.51698 | 0.004273585 | Credible Set | purple |
| chr2:94577500 | 2   | 94.57750 | 0.012341045 | Credible Set | purple |
| chr2:94657941 | 2   | 94.65794 | 0.012961878 | Credible Set | purple |
| chr2:94718556 | 2   | 94.71856 | 0.012015751 | Credible Set | purple |
| chr2:94748712 | 2   | 94.74871 | 0.012380196 | Credible Set | purple |
| chr2:95141904 | 2   | 95.14190 | 0.014227263 | Credible Set | purple |
| chr2:95200398 | 2   | 95.20040 | 0.010844635 | Credible Set | purple |
| chr2:95390243 | 2   | 95.39024 | 0.059728141 | Credible Set | purple |
| chr2:95390247 | 2   | 95.39025 | 0.059770866 | Credible Set | purple |
| chr2:95390277 | 2   | 95.39028 | 0.060230096 | Credible Set | purple |
| chr2:95390284 | 2   | 95.39028 | 0.058906829 | Credible Set | purple |
| chr2:95390546 | 2   | 95.39055 | 0.020184125 | Credible Set | purple |
| chr2:95390592 | 2   | 95.39059 | 0.019936029 | Credible Set | purple |
| chr2:95641124 | 2   | 95.64112 | 0.012846967 | Credible Set | purple |
| chr2:95641477 | 2   | 95.64148 | 0.013193742 | Credible Set | purple |
| chr2:95752277 | 2   | 95.75228 | 0.019523766 | Credible Set | purple |
| chr2:95805867 | 2   | 95.80587 | 0.017373588 | Credible Set | purple |
| chr2:95806028 | 2   | 95.80603 | 0.029073764 | Credible Set | purple |
| chr2:95806038 | 2   | 95.80604 | 0.029529119 | Credible Set | purple |
| chr2:95808603 | 2   | 95.80860 | 0.015342283 | Credible Set | purple |
| chr2:95850674 | 2   | 95.85067 | 0.015788549 | Credible Set | purple |
| chr2:95900229 | 2   | 95.90023 | 0.015717564 | Credible Set | purple |
| chr2:95906738 | 2   | 95.90674 | 0.015978506 | Credible Set | purple |
| chr2:95906783 | 2   | 95.90678 | 0.015482285 | Credible Set | purple |
| chr2:95938782 | 2   | 95.93878 | 0.013640948 | Credible Set | purple |
| chr2:95957448 | 2   | 95.95745 | 0.011315624 | Credible Set | purple |
| chr2:96132587 | 2   | 96.13259 | 0.013714611 | Credible Set | purple |
| chr2:96209134 | 2   | 96.20913 | 0.019358695 | Credible Set | purple |
| chr2:96209157 | 2   | 96.20916 | 0.020182630 | Credible Set | purple |
| chr2:96293855 | 2   | 96.29385 | 0.014727956 | Credible Set | purple |
| chr2:96320222 | 2   | 96.32022 | 0.012895956 | Credible Set | purple |
| chr2:96320237 | 2   | 96.32024 | 0.012286318 | Credible Set | purple |
| chr2:96320641 | 2   | 96.32064 | 0.014788430 | Credible Set | purple |

Fine-mapping Regions

| snp           | chr | pos (Mb) | pp          | group        | color  |
|---------------|-----|----------|-------------|--------------|--------|
| chr2:96412425 | 2   | 96.41242 | 0.015456362 | Credible Set | purple |
| chr2:96451438 | 2   | 96.45144 | 0.015717564 | Credible Set | purple |
| chr2:96462914 | 2   | 96.46291 | 0.010161779 | Credible Set | purple |
| chr2:96468064 | 2   | 96.46806 | 0.016410181 | Credible Set | purple |
| chr2:96611762 | 2   | 96.61176 | 0.015225620 | Credible Set | purple |
| chr2:96645727 | 2   | 96.64573 | 0.015411943 | Credible Set | purple |
| chr2:96697256 | 2   | 96.69726 | 0.015923691 | Credible Set | purple |
| chr2:96697871 | 2   | 96.69787 | 0.013982276 | Credible Set | purple |
| chr2:96697872 | 2   | 96.69787 | 0.013340510 | Credible Set | purple |
| chr2:96701045 | 2   | 96.70104 | 0.016735851 | Credible Set | purple |
| chr2:96701070 | 2   | 96.70107 | 0.016735851 | Credible Set | purple |
| chr2:96701077 | 2   | 96.70108 | 0.016735851 | Credible Set | purple |
| chr2:96701079 | 2   | 96.70108 | 0.016735851 | Credible Set | purple |
| chr2:96701166 | 2   | 96.70117 | 0.016956979 | Credible Set | purple |
| chr2:96766199 | 2   | 96.76620 | 0.018132457 | Credible Set | purple |
| chr2:96771761 | 2   | 96.77176 | 0.015495858 | Credible Set | purple |
| chr2:96771791 | 2   | 96.77179 | 0.015502934 | Credible Set | purple |
| chr2:96771900 | 2   | 96.77190 | 0.002487796 | Credible Set | purple |
| chr2:96771931 | 2   | 96.77193 | 0.002470562 | Credible Set | purple |
| chr2:96771968 | 2   | 96.77197 | 0.002505934 | Credible Set | purple |
| chr2:96786046 | 2   | 96.78605 | 0.007082194 | Credible Set | purple |
| chr2:97355566 | 2   | 97.35557 | 0.002361193 | Credible Set | purple |

F34 GBS, iron content in spleen

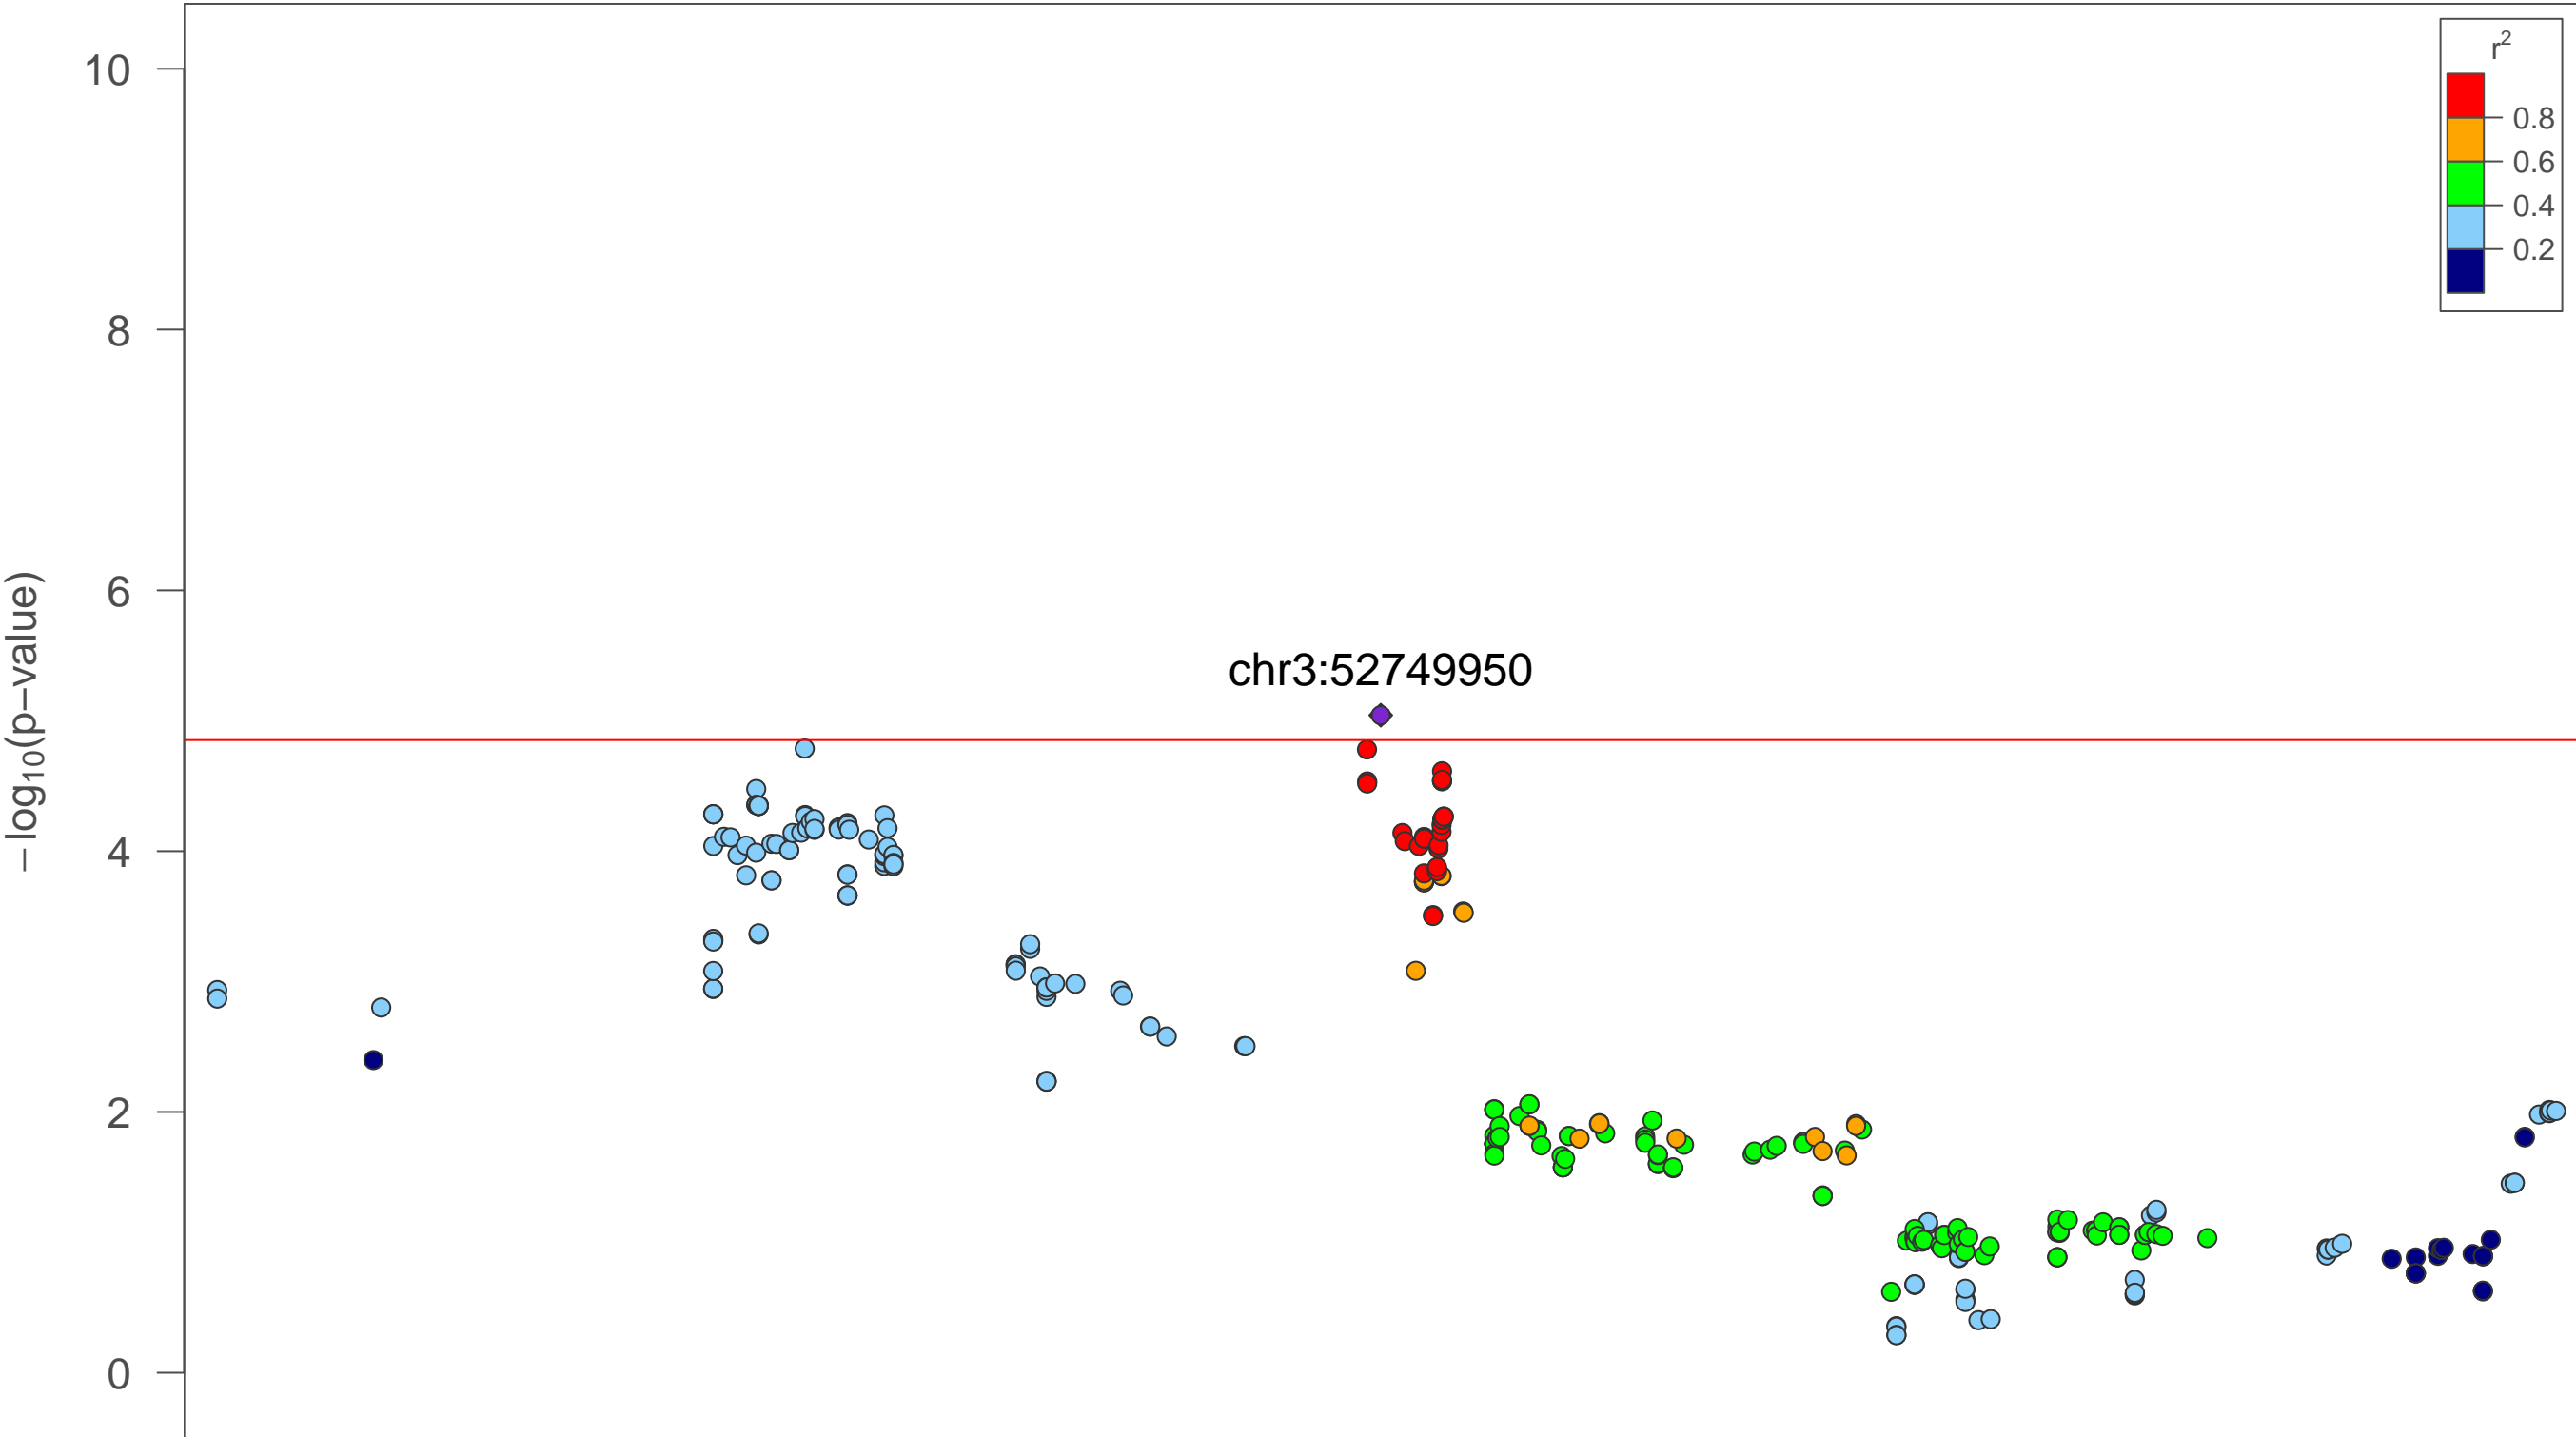

Credible Set

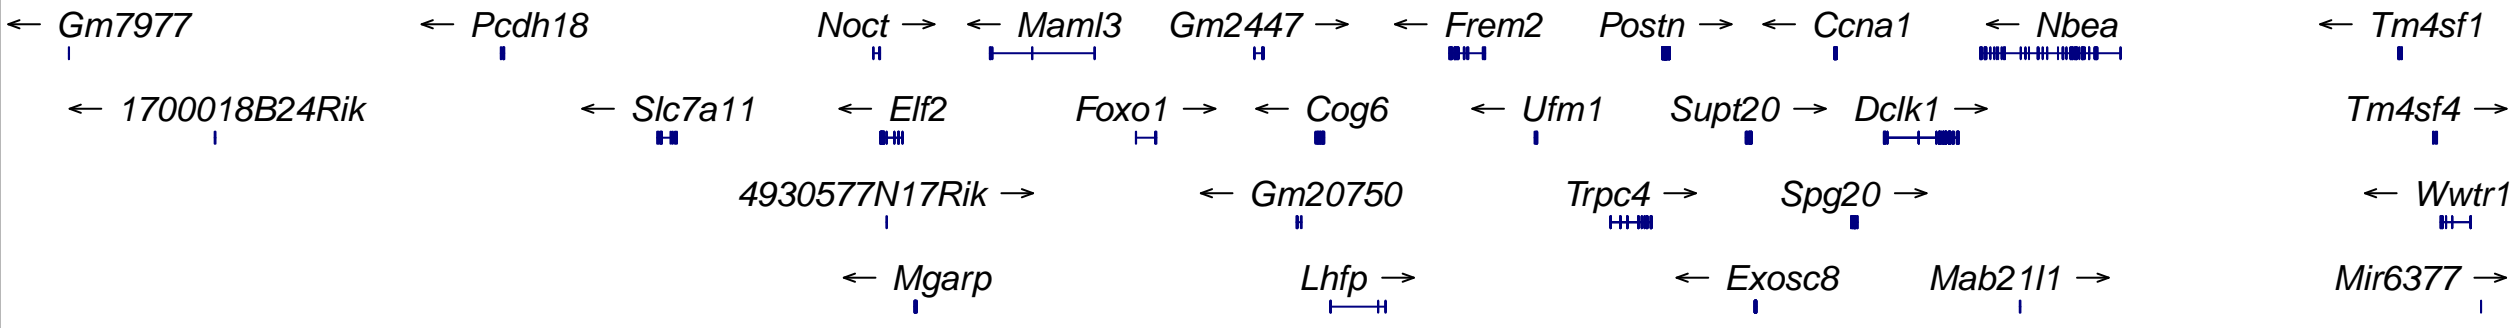

20 genes  
omitted



date: Thu Oct 25 17:16:57 2018

build: F34GBS

display range: chr3:47749950–57749950 [47749950–57749950]

hilite range: 0 – 0 [ 0 – 0 ]

reference SNP: chr3:52749950

number of SNPs plotted: 317

min P-value: 9.06E–6 [chr3:52749950]

max P-value: 5.15E–1 [chr3:54904358]

omitted Genes: Ndufc1, Naa15, Rab33b

omitted Genes: Setd7, 5031434O11Rik, Mgst2

omitted Genes: Nhlrc3, Proser1, Stoml3

omitted Genes: Alg5, Smad9, Rfxap

omitted Genes: Sertm1, 4931419H13Rik, Ccdc169

omitted Genes: Sohlh2, 4933417G07Rik, Commd2

omitted Genes: Ankub1, Rnf13

Fine-mapping Regions

| snp           | chr | pos (Mb) | pp          | group        | color  |
|---------------|-----|----------|-------------|--------------|--------|
| chr3:52692409 | 3   | 52.69241 | 0.091070052 | Credible Set | purple |
| chr3:52693102 | 3   | 52.69310 | 0.053261125 | Credible Set | purple |
| chr3:52693118 | 3   | 52.69312 | 0.051424485 | Credible Set | purple |
| chr3:52749950 | 3   | 52.74995 | 0.162176484 | Credible Set | purple |
| chr3:52840387 | 3   | 52.84039 | 0.022454062 | Credible Set | purple |
| chr3:52850138 | 3   | 52.85014 | 0.019591585 | Credible Set | purple |
| chr3:52909024 | 3   | 52.90902 | 0.018062705 | Credible Set | purple |
| chr3:52930454 | 3   | 52.93045 | 0.011449708 | Credible Set | purple |
| chr3:52930496 | 3   | 52.93050 | 0.021017474 | Credible Set | purple |
| chr3:52930984 | 3   | 52.93098 | 0.020415498 | Credible Set | purple |
| chr3:52968213 | 3   | 52.96821 | 0.005732275 | Credible Set | purple |
| chr3:52984307 | 3   | 52.98431 | 0.012393474 | Credible Set | purple |
| chr3:52984901 | 3   | 52.98490 | 0.011875211 | Credible Set | purple |
| chr3:52984912 | 3   | 52.98491 | 0.012712593 | Credible Set | purple |
| chr3:52990872 | 3   | 52.99087 | 0.017261375 | Credible Set | purple |
| chr3:52991306 | 3   | 52.99131 | 0.018288001 | Credible Set | purple |
| chr3:53003556 | 3   | 53.00356 | 0.022880283 | Credible Set | purple |
| chr3:53003614 | 3   | 53.00361 | 0.025714821 | Credible Set | purple |
| chr3:53005849 | 3   | 53.00585 | 0.053327565 | Credible Set | purple |
| chr3:53005874 | 3   | 53.00587 | 0.053759283 | Credible Set | purple |
| chr3:53005885 | 3   | 53.00588 | 0.063184534 | Credible Set | purple |
| chr3:53005909 | 3   | 53.00591 | 0.054663344 | Credible Set | purple |
| chr3:53007126 | 3   | 53.00713 | 0.028248747 | Credible Set | purple |
| chr3:53007129 | 3   | 53.00713 | 0.028100592 | Credible Set | purple |
| chr3:53007177 | 3   | 53.00718 | 0.028100592 | Credible Set | purple |
| chr3:53007214 | 3   | 53.00721 | 0.028152758 | Credible Set | purple |
| chr3:53013134 | 3   | 53.01313 | 0.029551286 | Credible Set | purple |
| chr3:53013153 | 3   | 53.01315 | 0.029486145 | Credible Set | purple |

F34 GBS, iron content in spleen

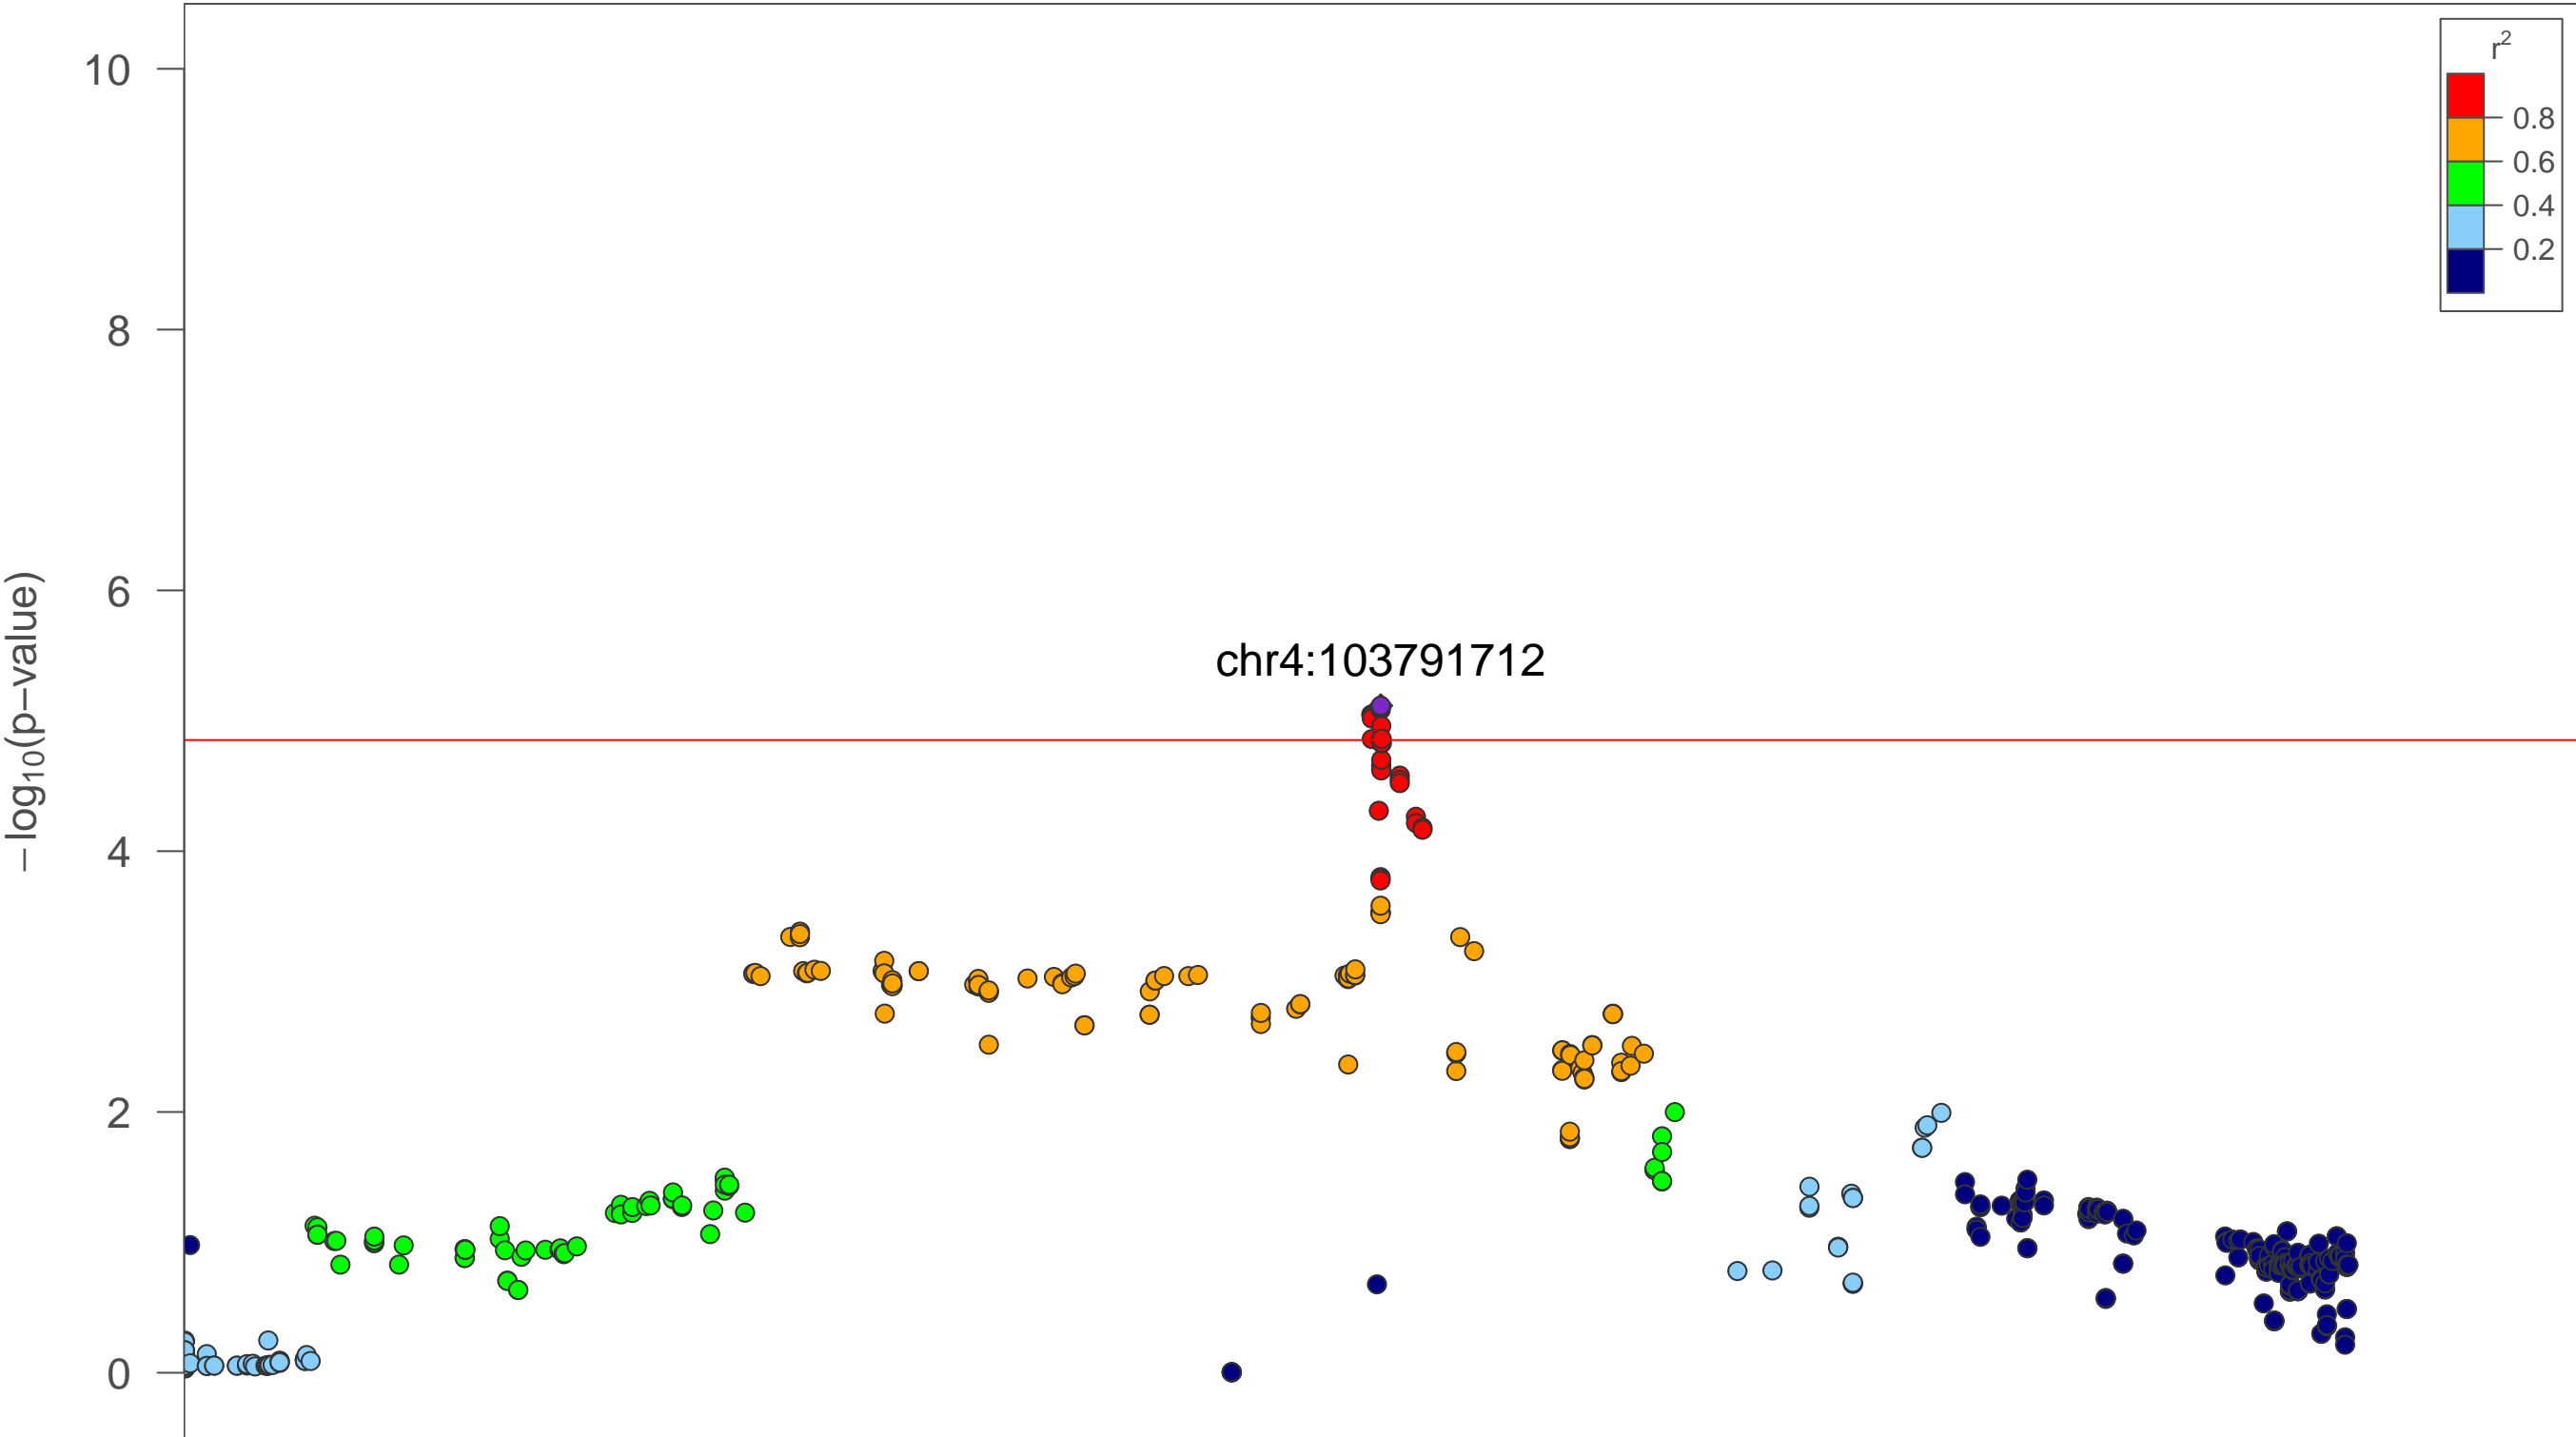

Credible Set

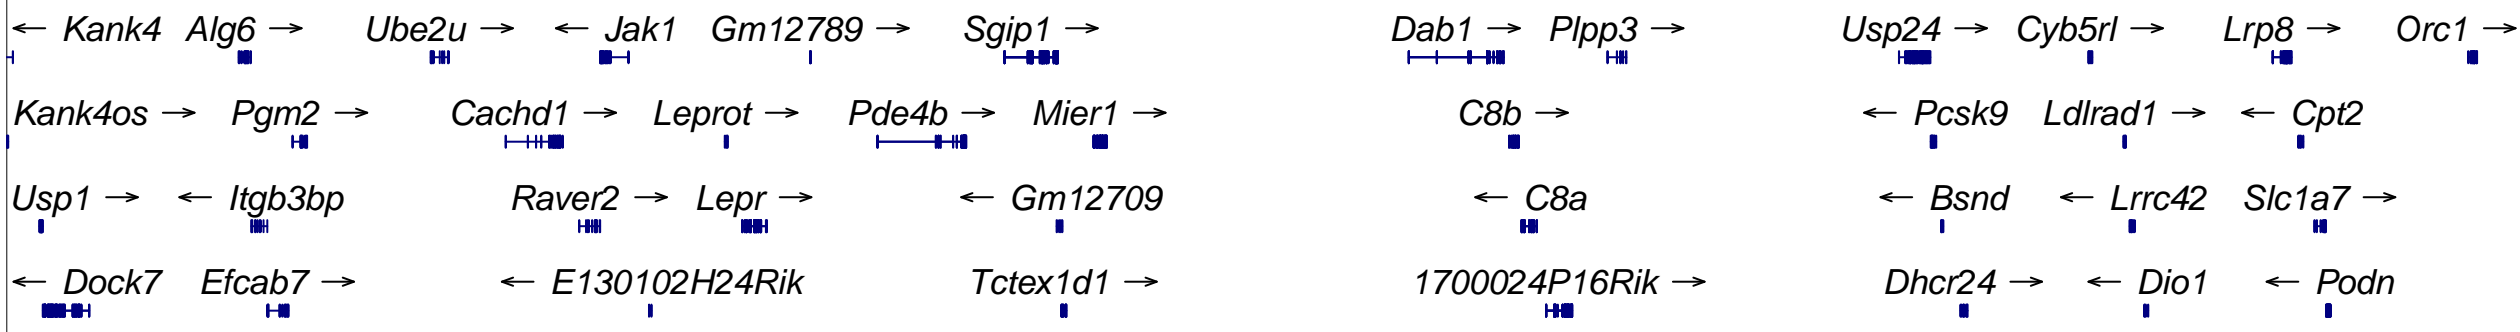

51 genes  
omitted

Position on chr4 (Mb)

date: Thu Oct 25 17:17:06 2018  
build: F34GBS  
display range: chr4:98791712–108791712 [98791712–108791712]  
hilite range: 0 – 0 [ 0 – 0 ]  
reference SNP: chr4:103791712  
number of SNPs plotted: 490  
min P-value: 7.66E–6 [chr4:103791712]  
max P-value: 9.9E–1 [chr4:103168898]  
omitted Genes: Angptl3, Atg4c, Foxd3  
omitted Genes: Ror1, Mir101a, 0610043K17Rik  
omitted Genes: Ak4, Dnajc6, B020004J07Rik  
omitted Genes: Gm12794, BB031773, Insl5  
omitted Genes: Wdr78, Slc35d1, 4921539E11Rik  
omitted Genes: 4930456L15Rik, Oma1, Gm12718  
omitted Genes: Prkaa2, Lexm, Ttc22  
omitted Genes: Pars2, Ttc4, Mroh7  
omitted Genes: Fam151a, Acot11, Ssbp3  
omitted Genes: Mrpl37, Cdcp2, Tceanc2  
omitted Genes: Tmem59, Hspb11, Yipf1  
omitted Genes: Ndc1, Glis1, Dmrtb1  
omitted Genes: Magoh, 0610037L13Rik, 4930407G08Rik  
omitted Genes: Scp2, Mir6397, Echdc2  
omitted Genes: Zyg11a, Zyg11b, Coa7  
omitted Genes: Fam159a, Gpx7, Zcchc11  
omitted Genes: Prpf38a, Cc2d1b, Zfyve9

## Fine-mapping Regions

| snp            | chr | pos (Mb) | pp          | group        | color  |
|----------------|-----|----------|-------------|--------------|--------|
| chr4:103751840 | 4   | 103.7518 | 0.060248995 | Credible Set | purple |
| chr4:103753885 | 4   | 103.7539 | 0.059873440 | Credible Set | purple |
| chr4:103754141 | 4   | 103.7541 | 0.058482338 | Credible Set | purple |
| chr4:103754184 | 4   | 103.7542 | 0.056405548 | Credible Set | purple |
| chr4:103754202 | 4   | 103.7542 | 0.039877523 | Credible Set | purple |
| chr4:103783541 | 4   | 103.7835 | 0.011960620 | Credible Set | purple |
| chr4:103790658 | 4   | 103.7907 | 0.003950926 | Credible Set | purple |
| chr4:103791594 | 4   | 103.7916 | 0.039534427 | Credible Set | purple |
| chr4:103791682 | 4   | 103.7917 | 0.065301368 | Credible Set | purple |
| chr4:103791711 | 4   | 103.7917 | 0.067833988 | Credible Set | purple |
| chr4:103791712 | 4   | 103.7917 | 0.069999100 | Credible Set | purple |
| chr4:103791722 | 4   | 103.7917 | 0.068503483 | Credible Set | purple |
| chr4:103793565 | 4   | 103.7936 | 0.025606589 | Credible Set | purple |
| chr4:103793571 | 4   | 103.7936 | 0.025606589 | Credible Set | purple |
| chr4:103793605 | 4   | 103.7936 | 0.024249422 | Credible Set | purple |
| chr4:103793645 | 4   | 103.7936 | 0.023516073 | Credible Set | purple |
| chr4:103793861 | 4   | 103.7939 | 0.028138877 | Credible Set | purple |
| chr4:103793969 | 4   | 103.7940 | 0.049739800 | Credible Set | purple |
| chr4:103795720 | 4   | 103.7957 | 0.037046784 | Credible Set | purple |
| chr4:103795724 | 4   | 103.7957 | 0.037566074 | Credible Set | purple |
| chr4:103795744 | 4   | 103.7957 | 0.039998714 | Credible Set | purple |
| chr4:103871016 | 4   | 103.8710 | 0.021578348 | Credible Set | purple |
| chr4:103871045 | 4   | 103.8710 | 0.020066791 | Credible Set | purple |
| chr4:103871082 | 4   | 103.8711 | 0.019014715 | Credible Set | purple |
| chr4:103938428 | 4   | 103.9384 | 0.010822195 | Credible Set | purple |
| chr4:103938894 | 4   | 103.9389 | 0.009735167 | Credible Set | purple |
| chr4:103966010 | 4   | 103.9660 | 0.009009925 | Credible Set | purple |
| chr4:103966020 | 4   | 103.9660 | 0.008705388 | Credible Set | purple |

F34 GBS, iron content in spleen

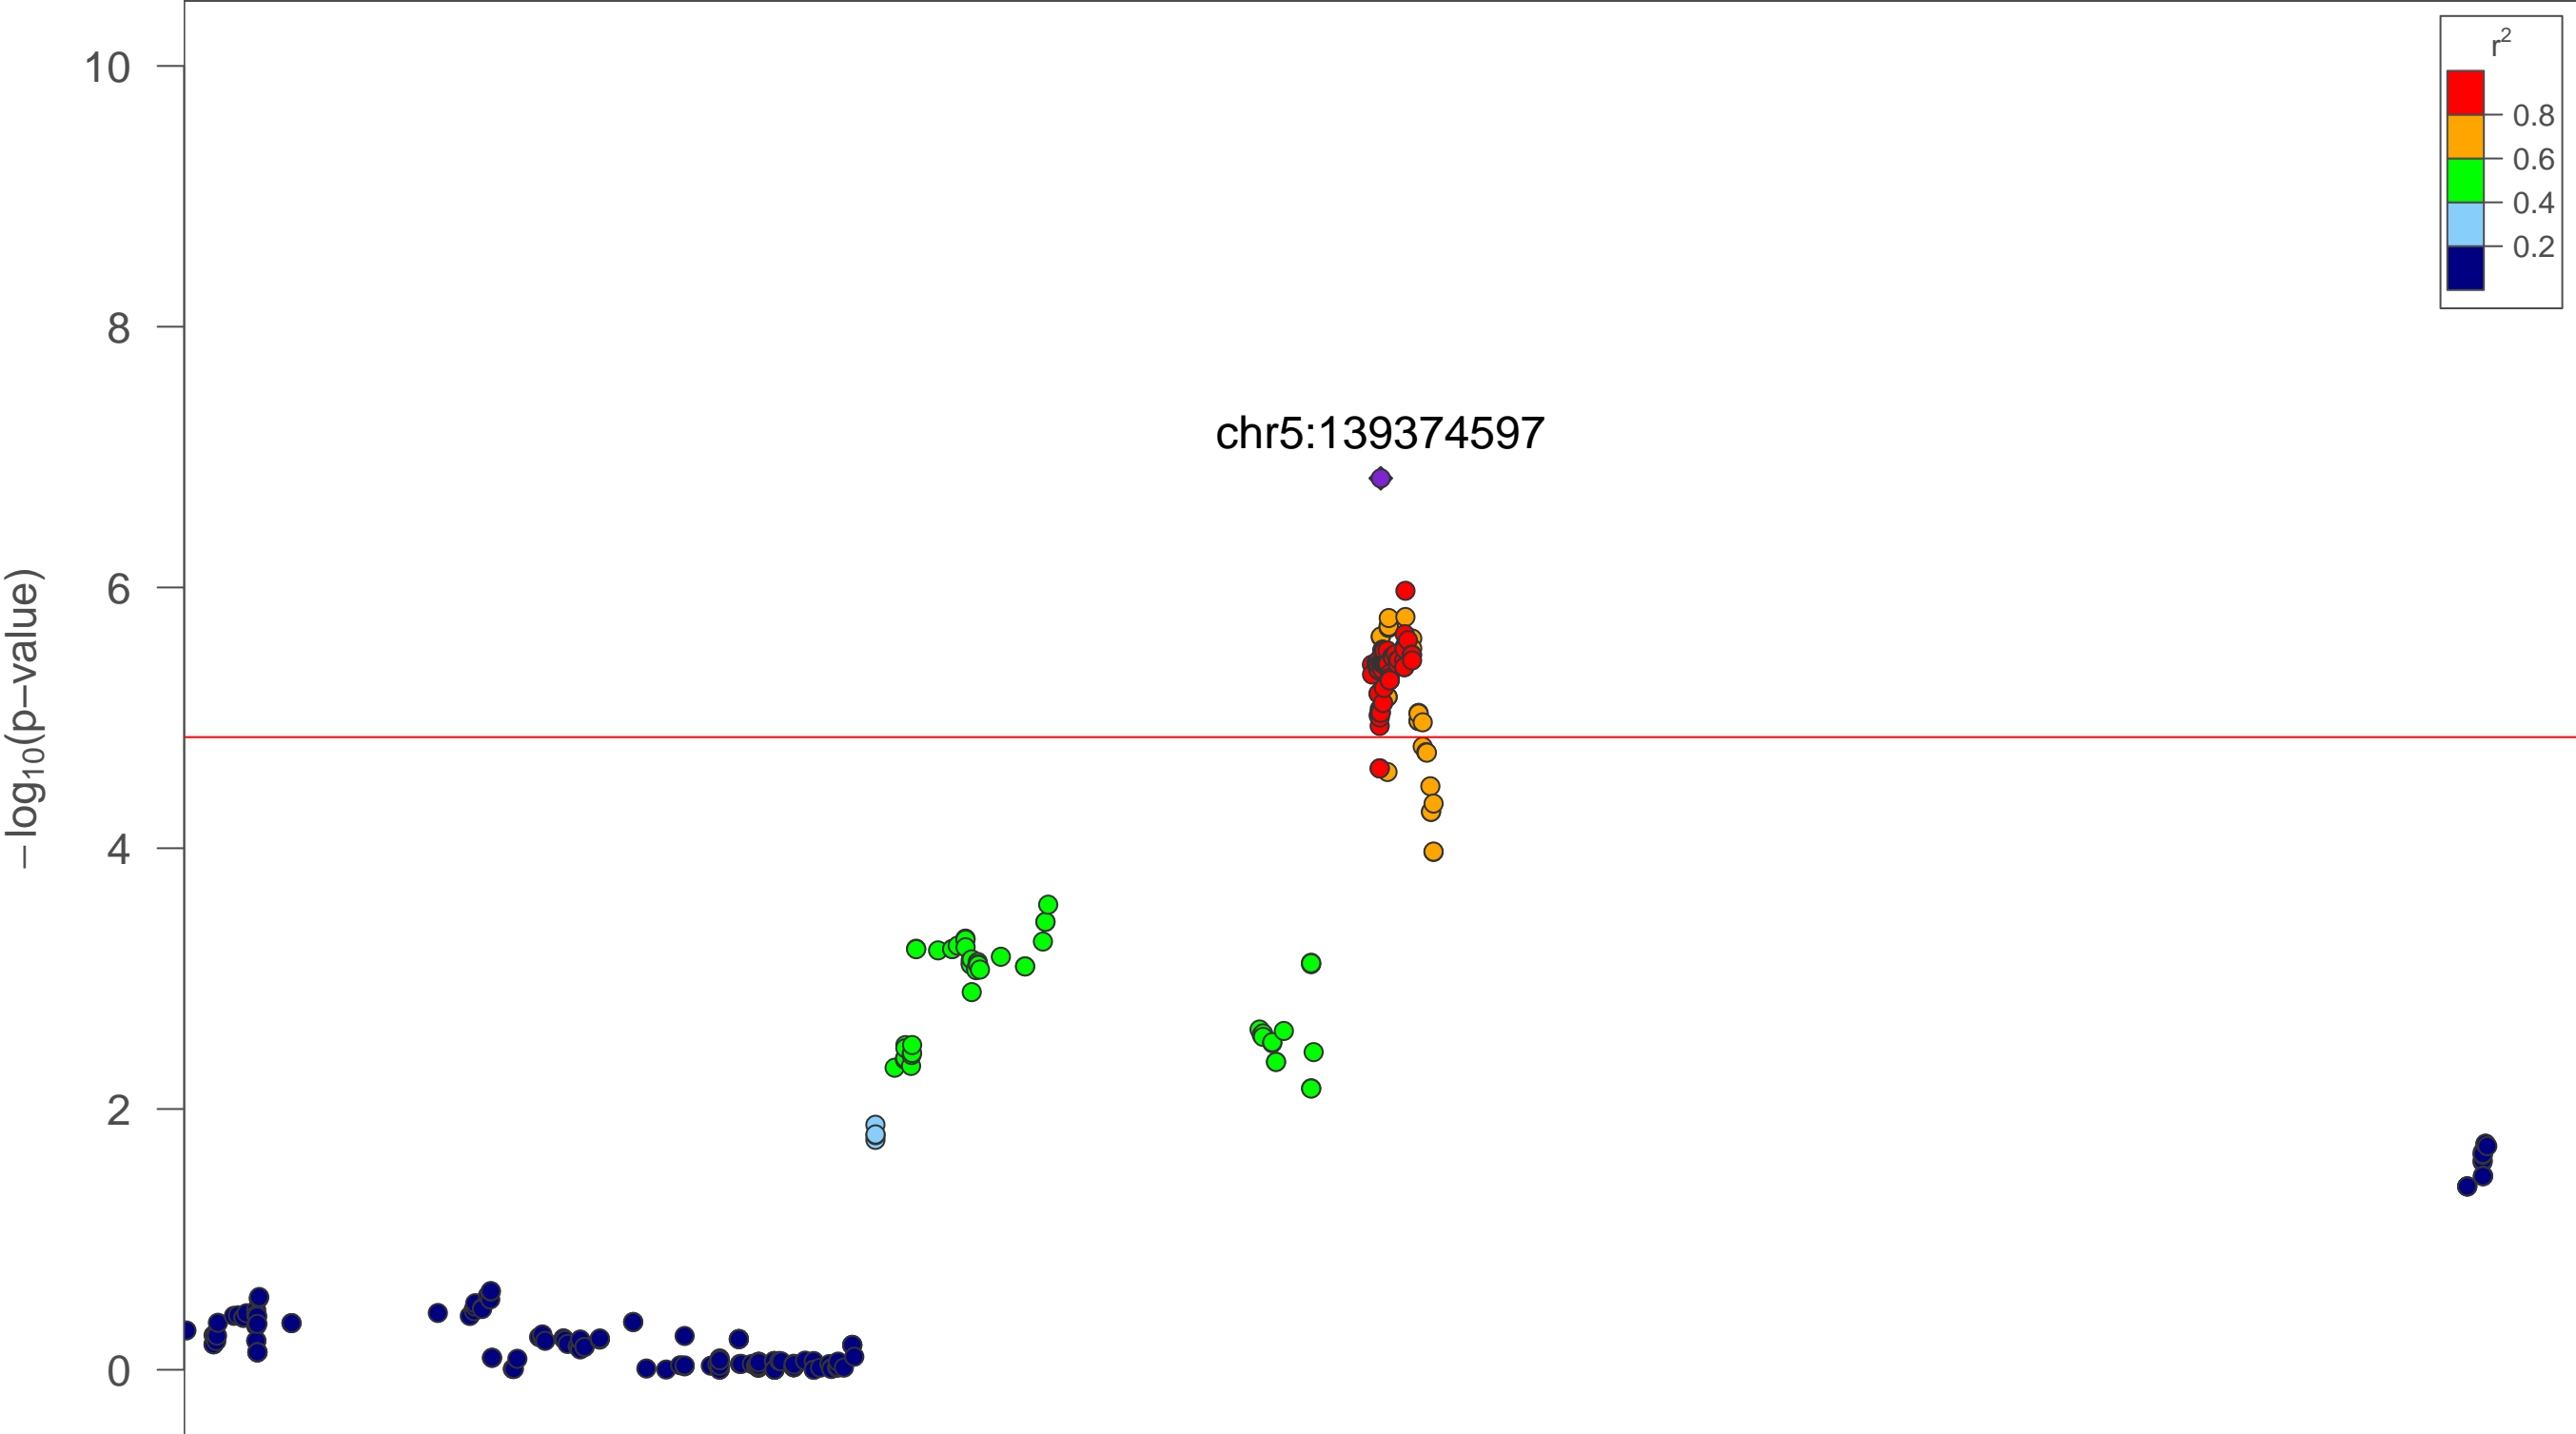

Credible Set

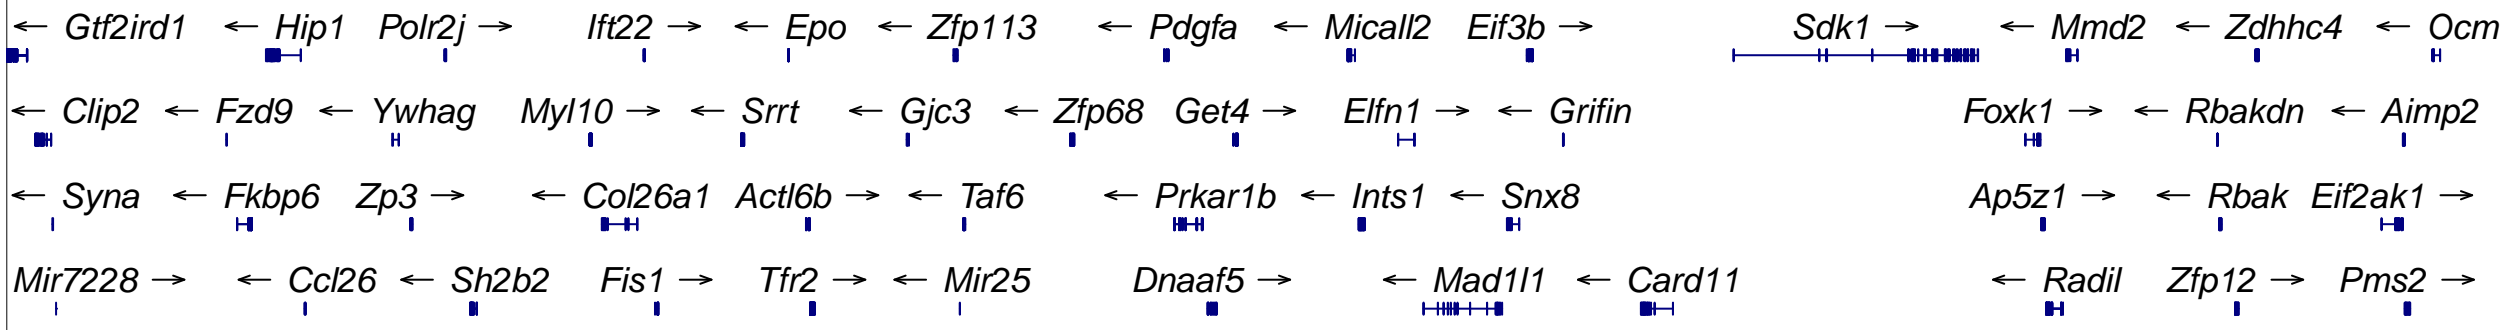

167 genes  
omitted

Position on chr5 (Mb)

date: Thu Oct 25 17:17:18 2018

build: F34GBS

display range: chr5:134374597–144374597 [134374597–144374597]

hilite range: 0 – 0 [ 0 – 0 ]

reference SNP: chr5:139374597

number of SNPs plotted: 310

min P-value: 1.45E–7 [chr5:139374597]

max P-value: 10E–1 [chr5:136841971]

omitted Genes: Rfc2, Lat2, Eif4h

omitted Genes: Limk1, Eln, Wbscr28

omitted Genes: Cldn13, Wbscr27, Cldn4

omitted Genes: Cldn3, Wbscr25, Abhd11

omitted Genes: Abhd11os, Stx1a, Wbscr22

omitted Genes: Dnajc30, Vps37d, Mlxipl

omitted Genes: Tbl2, Bcl7b, Baz1b

omitted Genes: Trim50, Nsun5, Pom121

omitted Genes: Mir7033, Ccl24, Rhbdd2

omitted Genes: Por, Tmem120a, Mir7034

omitted Genes: Styxl1, Mdh2, Srrm3

omitted Genes: Hspb1, Ssc4d, Dtx2

omitted Genes: Upk3b, Upk3bl, Rasa4

omitted Genes: Mir7035, Lrwd1, Alkbh4

omitted Genes: Orai2, Prkrip1, Cux1

omitted Genes: Mir721, 4933404O12Rik, Cldn15

omitted Genes: Znhit1, Plod3, Mir702

omitted Genes: Vgf, Ap1s1, Serpine1

omitted Genes: Trim56, Ache, Mir8116

omitted Genes: Ufsp1, Mir7036, Trip6

omitted Genes: Slc12a9, Ephb4, Zan

omitted Genes: Pop7, Gigyf1, Gnb2

omitted Genes: Mir6418, Mospd3, Pcolce

omitted Genes: Fbxo24, Lrch4, Gm20605

omitted Genes: Sap25, Irs3, Agfg2

omitted Genes: Nyap1, Tsc22d4, Ppp1r35

omitted Genes: Mepce, Zcwpw1, Pilra

omitted Genes: Pilrb1, Pilrb2, Cyp3a13

omitted Genes: Azgp1, Smok3a, Smok3b

omitted Genes: Smok3c, Zkscan1, Zscan21

omitted Genes: Cops6, Mcm7, Mir93  
Make more plots at <http://csg.sph.umich.edu/locuszoom/>

omitted Genes: Mir106b, Ap4m1, Cnpy4

## Fine-mapping Regions

| snp            | chr | pos (Mb) | pp          | group        | color  |
|----------------|-----|----------|-------------|--------------|--------|
| chr5:139337717 | 5   | 139.3377 | 0.010560657 | Credible Set | purple |
| chr5:139338124 | 5   | 139.3381 | 0.008919521 | Credible Set | purple |
| chr5:139356059 | 5   | 139.3561 | 0.010727733 | Credible Set | purple |
| chr5:139357023 | 5   | 139.3570 | 0.010724215 | Credible Set | purple |
| chr5:139357028 | 5   | 139.3570 | 0.010724215 | Credible Set | purple |
| chr5:139359983 | 5   | 139.3600 | 0.010197570 | Credible Set | purple |
| chr5:139360537 | 5   | 139.3605 | 0.010396517 | Credible Set | purple |
| chr5:139365262 | 5   | 139.3653 | 0.009568568 | Credible Set | purple |
| chr5:139365292 | 5   | 139.3653 | 0.011368721 | Credible Set | purple |
| chr5:139365343 | 5   | 139.3653 | 0.009718053 | Credible Set | purple |
| chr5:139365434 | 5   | 139.3654 | 0.006460345 | Credible Set | purple |
| chr5:139365448 | 5   | 139.3654 | 0.006468110 | Credible Set | purple |
| chr5:139365601 | 5   | 139.3656 | 0.009732867 | Credible Set | purple |
| chr5:139365659 | 5   | 139.3657 | 0.010562277 | Credible Set | purple |
| chr5:139365700 | 5   | 139.3657 | 0.004471959 | Credible Set | purple |
| chr5:139370400 | 5   | 139.3704 | 0.004984709 | Credible Set | purple |
| chr5:139370538 | 5   | 139.3705 | 0.004315281 | Credible Set | purple |
| chr5:139370586 | 5   | 139.3706 | 0.004772895 | Credible Set | purple |
| chr5:139370648 | 5   | 139.3706 | 0.004692687 | Credible Set | purple |
| chr5:139374544 | 5   | 139.3745 | 0.004711422 | Credible Set | purple |
| chr5:139374549 | 5   | 139.3745 | 0.004679596 | Credible Set | purple |
| chr5:139374597 | 5   | 139.3746 | 0.250932238 | Credible Set | purple |
| chr5:139374918 | 5   | 139.3749 | 0.010693262 | Credible Set | purple |
| chr5:139382014 | 5   | 139.3820 | 0.009692099 | Credible Set | purple |
| chr5:139382197 | 5   | 139.3822 | 0.013432980 | Credible Set | purple |
| chr5:139382215 | 5   | 139.3822 | 0.013432980 | Credible Set | purple |
| chr5:139382343 | 5   | 139.3823 | 0.013583832 | Credible Set | purple |
| chr5:139382347 | 5   | 139.3823 | 0.013583832 | Credible Set | purple |
| chr5:139382775 | 5   | 139.3828 | 0.010735423 | Credible Set | purple |
| chr5:139382789 | 5   | 139.3828 | 0.010735423 | Credible Set | purple |
| chr5:139384477 | 5   | 139.3845 | 0.005512212 | Credible Set | purple |
| chr5:139387948 | 5   | 139.3879 | 0.007107830 | Credible Set | purple |
| chr5:139388094 | 5   | 139.3881 | 0.011374631 | Credible Set | purple |
| chr5:139388781 | 5   | 139.3888 | 0.010788820 | Credible Set | purple |
| chr5:139389536 | 5   | 139.3895 | 0.013290725 | Credible Set | purple |
| chr5:139389540 | 5   | 139.3895 | 0.013290725 | Credible Set | purple |



## Fine-mapping Regions

| snp            | chr | pos (Mb) | pp          | group        | color  |
|----------------|-----|----------|-------------|--------------|--------|
| chr5:139389572 | 5   | 139.3896 | 0.013290725 | Credible Set | purple |
| chr5:139389578 | 5   | 139.3896 | 0.013290725 | Credible Set | purple |
| chr5:139391234 | 5   | 139.3912 | 0.010693262 | Credible Set | purple |
| chr5:139391358 | 5   | 139.3914 | 0.010693262 | Credible Set | purple |
| chr5:139395030 | 5   | 139.3950 | 0.010717465 | Credible Set | purple |
| chr5:139402752 | 5   | 139.4028 | 0.013387738 | Credible Set | purple |
| chr5:139403170 | 5   | 139.4032 | 0.010694234 | Credible Set | purple |
| chr5:139404712 | 5   | 139.4047 | 0.010693262 | Credible Set | purple |
| chr5:139404757 | 5   | 139.4048 | 0.010693262 | Credible Set | purple |
| chr5:139404767 | 5   | 139.4048 | 0.010693262 | Credible Set | purple |
| chr5:139411750 | 5   | 139.4118 | 0.009044341 | Credible Set | purple |
| chr5:139411803 | 5   | 139.4118 | 0.008416576 | Credible Set | purple |
| chr5:139411845 | 5   | 139.4118 | 0.008416576 | Credible Set | purple |
| chr5:139411920 | 5   | 139.4119 | 0.008458430 | Credible Set | purple |
| chr5:139412108 | 5   | 139.4121 | 0.008087735 | Credible Set | purple |
| chr5:139412109 | 5   | 139.4121 | 0.008087735 | Credible Set | purple |
| chr5:139422570 | 5   | 139.4226 | 0.012139100 | Credible Set | purple |
| chr5:139426676 | 5   | 139.4267 | 0.011789144 | Credible Set | purple |
| chr5:139437340 | 5   | 139.4373 | 0.012597787 | Credible Set | purple |
| chr5:139445073 | 5   | 139.4451 | 0.011395209 | Credible Set | purple |
| chr5:139445415 | 5   | 139.4454 | 0.010683502 | Credible Set | purple |
| chr5:139449959 | 5   | 139.4500 | 0.011440936 | Credible Set | purple |
| chr5:139472776 | 5   | 139.4728 | 0.011360873 | Credible Set | purple |
| chr5:139472992 | 5   | 139.4730 | 0.010093789 | Credible Set | purple |
| chr5:139472993 | 5   | 139.4730 | 0.010117467 | Credible Set | purple |
| chr5:139474788 | 5   | 139.4748 | 0.014378625 | Credible Set | purple |
| chr5:139474790 | 5   | 139.4748 | 0.013770989 | Credible Set | purple |
| chr5:139474824 | 5   | 139.4748 | 0.013724204 | Credible Set | purple |
| chr5:139474889 | 5   | 139.4749 | 0.017667987 | Credible Set | purple |
| chr5:139477643 | 5   | 139.4776 | 0.036929212 | Credible Set | purple |
| chr5:139488214 | 5   | 139.4882 | 0.015959674 | Credible Set | purple |
| chr5:139504674 | 5   | 139.5047 | 0.012514153 | Credible Set | purple |
| chr5:139505164 | 5   | 139.5052 | 0.012395512 | Credible Set | purple |
| chr5:139505384 | 5   | 139.5054 | 0.011326291 | Credible Set | purple |

F34 GBS, iron content in spleen

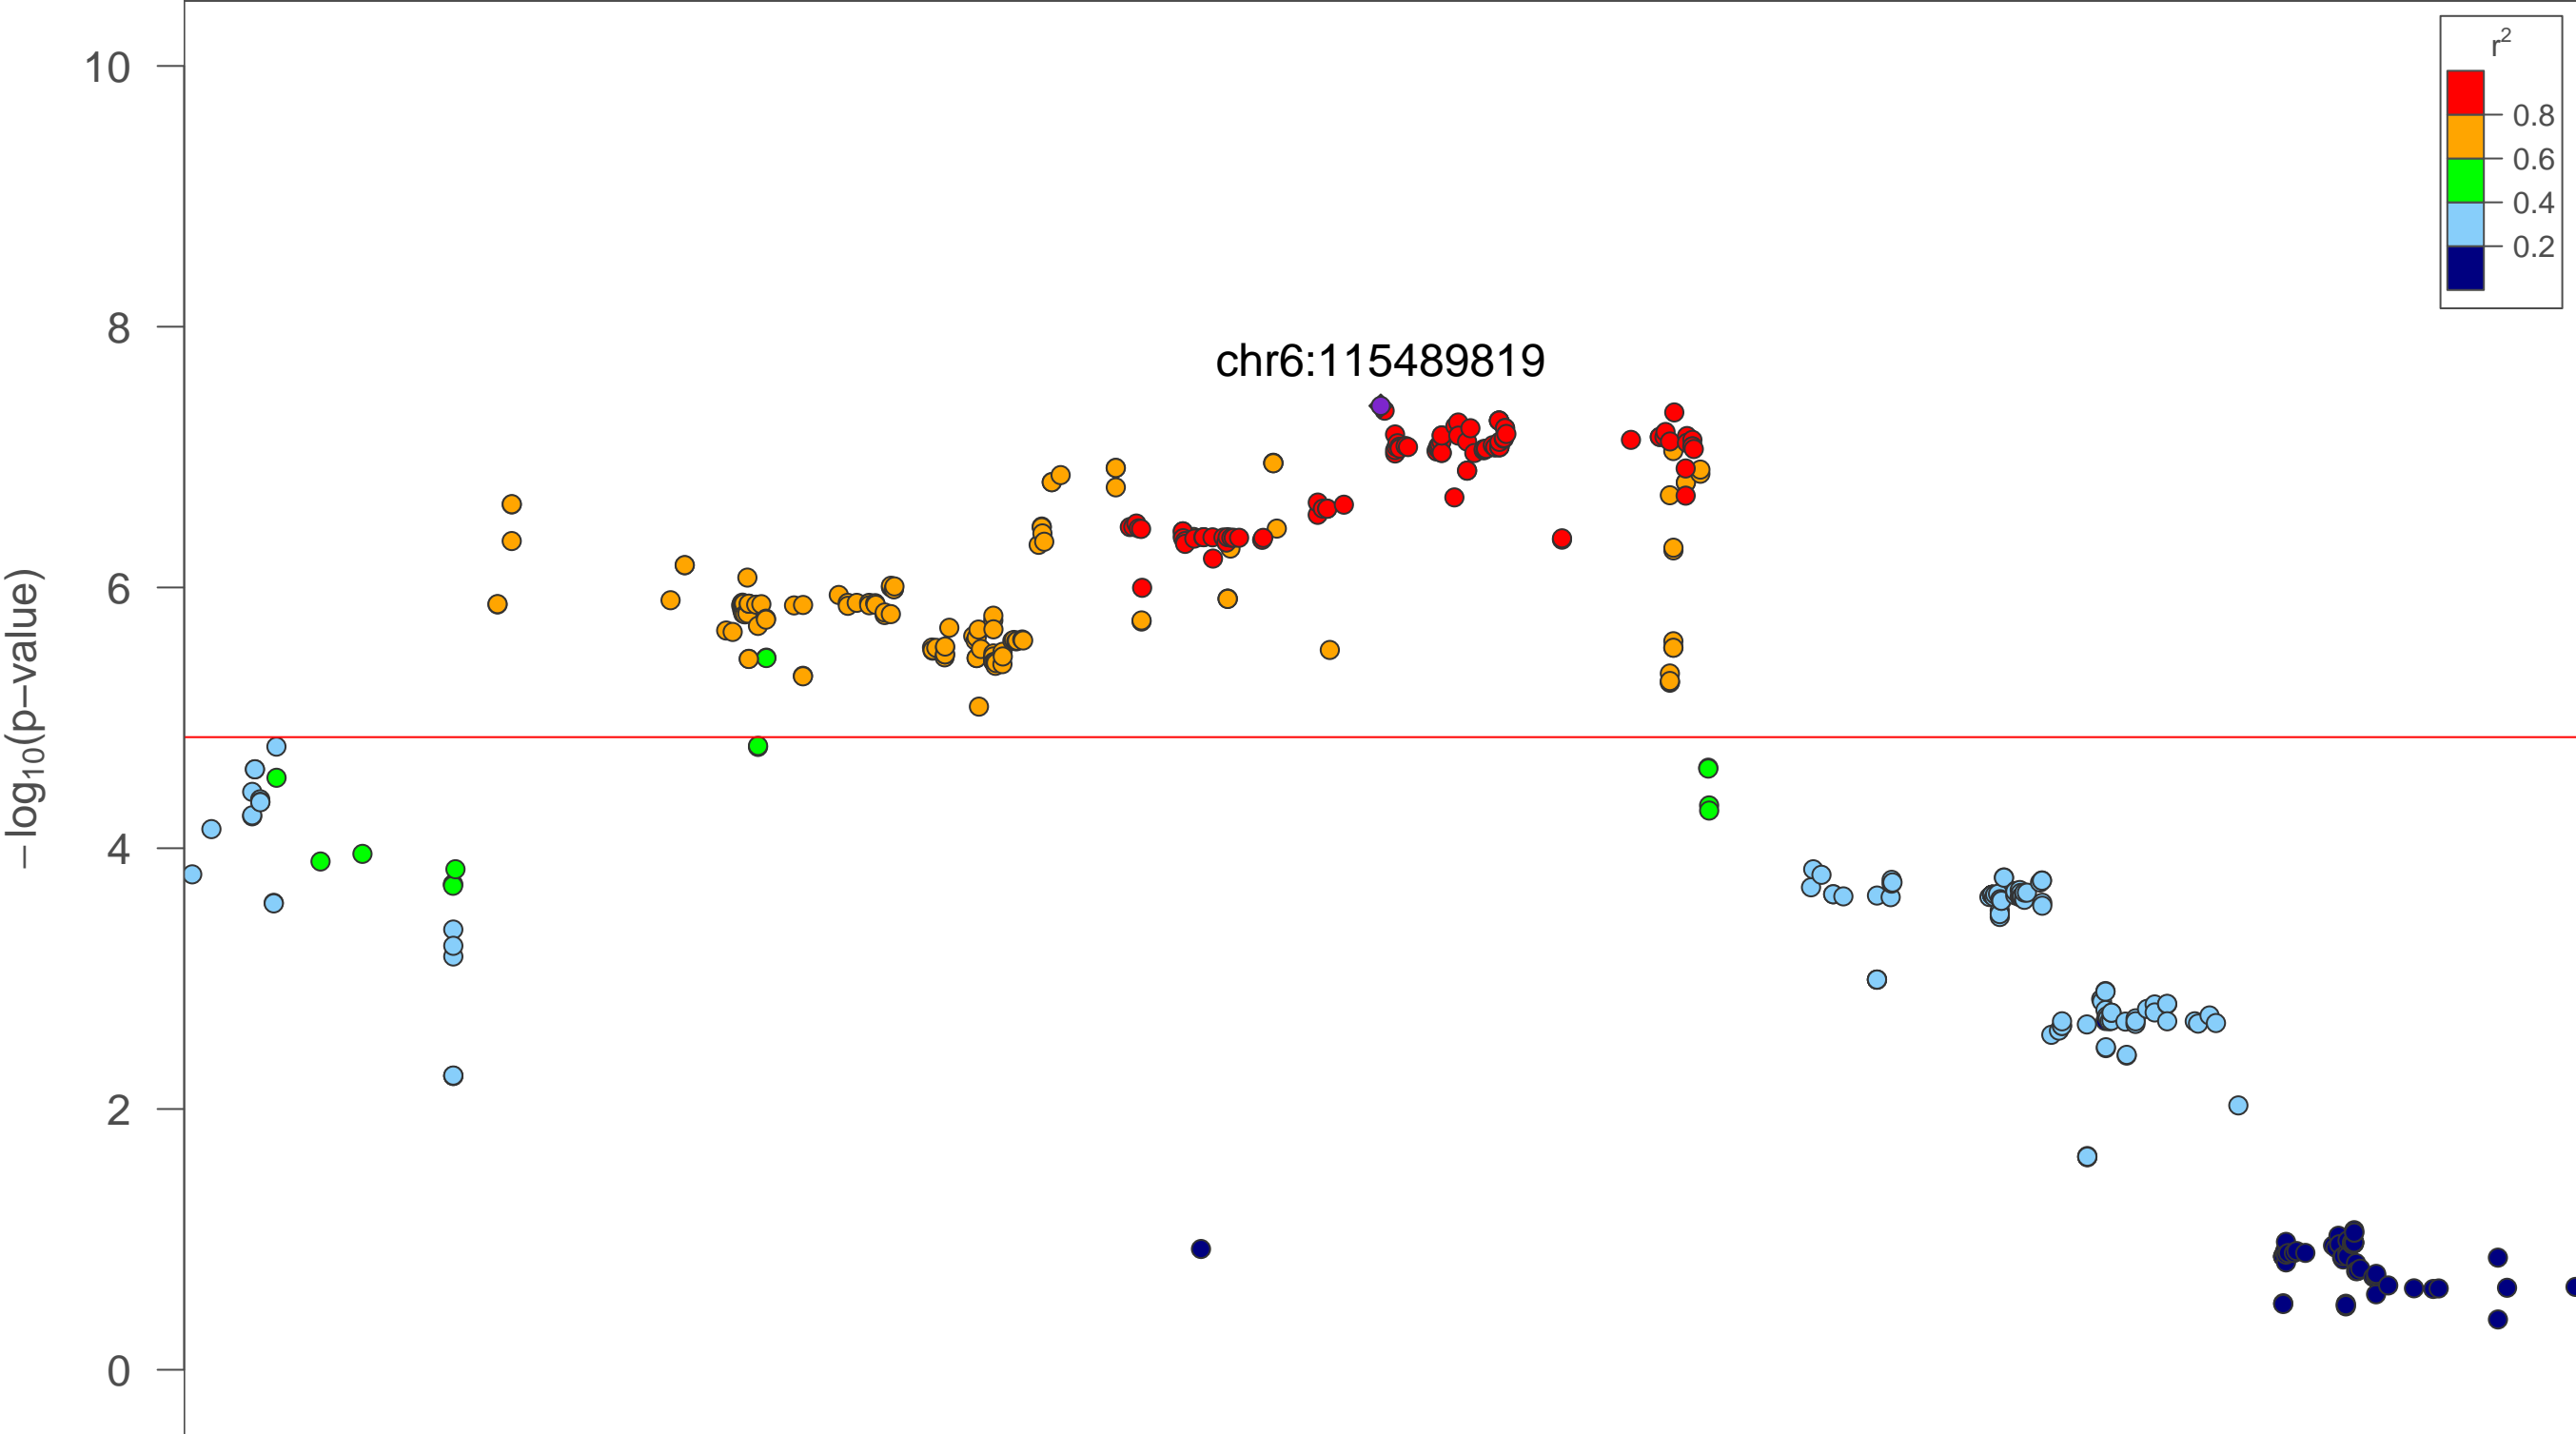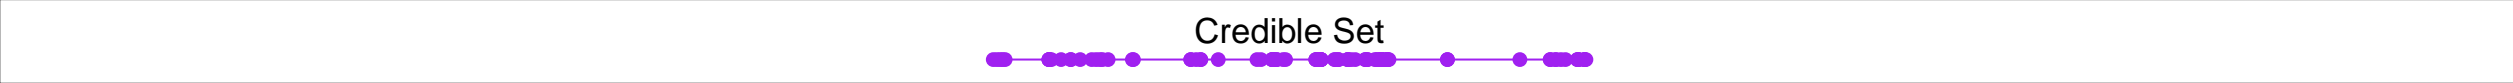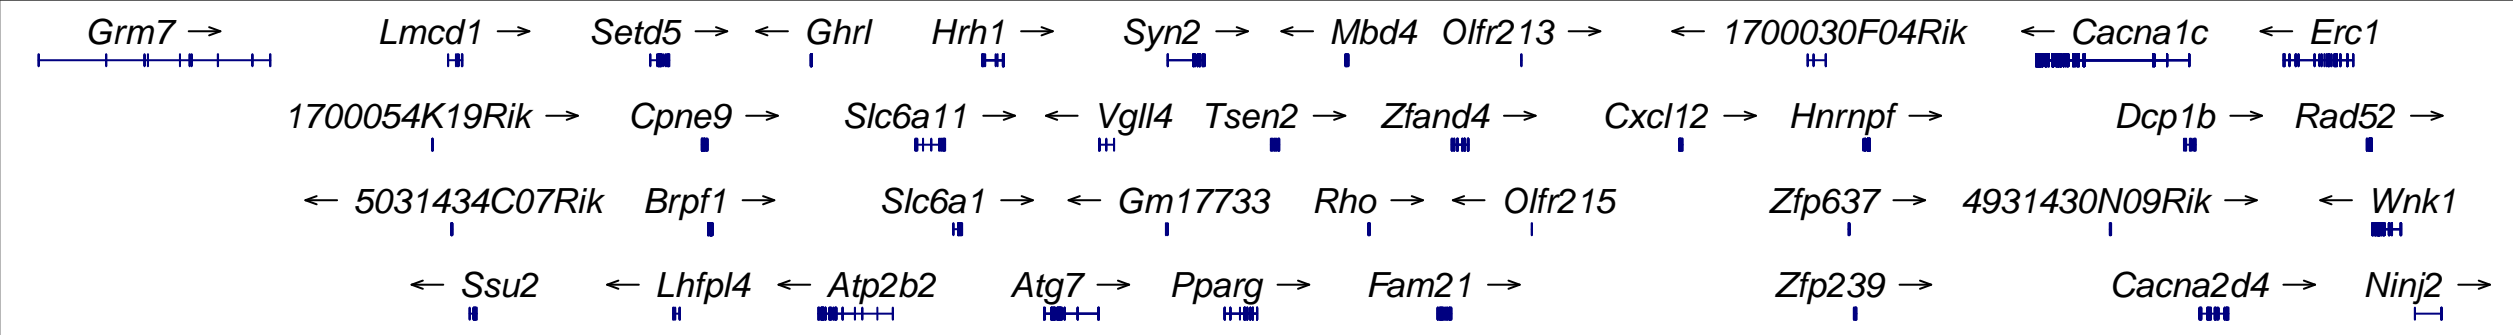

76 genes  
omitted

date: Thu Oct 25 17:17:29 2018  
build: F34GBS  
display range: chr6:110489819–120489819 [110489819–120489819]  
hilite range: 0 – 0 [ 0 – 0 ]  
reference SNP: chr6:115489819  
number of SNPs plotted: 413  
min P-value: 4.05E–8 [chr6:115489819]  
max P-value: 4.11E–1 [chr6:120157431]  
omitted Genes: Cav3, Oxtr, Rad18  
omitted Genes: Srgap3, Thumpd3, Gt(ROSA)26Sor  
omitted Genes: Mtmr14, Ogg1, Camk1  
omitted Genes: Tada3, Arpc4, Tll3  
omitted Genes: Rpusd3, Cidec, Jagn1  
omitted Genes: Il17re, Il17rc, Creld1  
omitted Genes: Prrt3, Emc3, Fancd2  
omitted Genes: Fancd2os, Brk1, Vhl  
omitted Genes: Irak2, Tatdn2, Mir7042  
omitted Genes: Sec13, Tamm41, Timp4  
omitted Genes: Mkrn2os, Mkrn2, Raf1  
omitted Genes: Tmem40, Cand2, Mir7660  
omitted Genes: Rpl32, Snora7a, Efcab12  
omitted Genes: Ift122, H1foo, Plxnd1  
omitted Genes: Tmcc1, 9530062K07Rik, March8  
omitted Genes: Alox5, Olfr211, Olfr212  
omitted Genes: Olfr214, Zfp422, Rassf4  
omitted Genes: Mir7043, 8430408G22Rik, Tmem72  
omitted Genes: Fxyd4, Rasgef1a, Mir7044  
omitted Genes: Csgalnact2, Ret, 1700069P05Rik  
omitted Genes: Gm30498, Bms1, Zfp248  
omitted Genes: Zfp9, Ankrd26, Lrtm2  
omitted Genes: Adipor2, Wnt5b, Fbxl14  
omitted Genes: 3110021A11Rik, Mir706, B4galnt3  
omitted Genes: Ccdc77, Kdm5a, Il17ra  
omitted Genes: Cecr6

## Fine-mapping Regions

| snp            | chr | pos (Mb) | pp          | group        | color  |
|----------------|-----|----------|-------------|--------------|--------|
| chr6:114441337 | 6   | 114.4413 | 0.003131998 | Credible Set | purple |
| chr6:114455822 | 6   | 114.4558 | 0.003142268 | Credible Set | purple |
| chr6:114468631 | 6   | 114.4686 | 0.003325717 | Credible Set | purple |
| chr6:114478350 | 6   | 114.4784 | 0.003062969 | Credible Set | purple |
| chr6:114488365 | 6   | 114.4884 | 0.003031376 | Credible Set | purple |
| chr6:114662685 | 6   | 114.6627 | 0.002909267 | Credible Set | purple |
| chr6:114662687 | 6   | 114.6627 | 0.002678002 | Credible Set | purple |
| chr6:114662831 | 6   | 114.6628 | 0.002911317 | Credible Set | purple |
| chr6:114663572 | 6   | 114.6636 | 0.002590470 | Credible Set | purple |
| chr6:114672224 | 6   | 114.6722 | 0.002466579 | Credible Set | purple |
| chr6:114710879 | 6   | 114.7109 | 0.002571449 | Credible Set | purple |
| chr6:114748520 | 6   | 114.7485 | 0.002634972 | Credible Set | purple |
| chr6:114750218 | 6   | 114.7502 | 0.002634972 | Credible Set | purple |
| chr6:114786887 | 6   | 114.7869 | 0.002628276 | Credible Set | purple |
| chr6:114832604 | 6   | 114.8326 | 0.002620164 | Credible Set | purple |
| chr6:114850118 | 6   | 114.8501 | 0.002634972 | Credible Set | purple |
| chr6:114865580 | 6   | 114.8656 | 0.002607757 | Credible Set | purple |
| chr6:114875411 | 6   | 114.8754 | 0.002607757 | Credible Set | purple |
| chr6:114897837 | 6   | 114.8978 | 0.002607757 | Credible Set | purple |
| chr6:114994269 | 6   | 114.9943 | 0.002517055 | Credible Set | purple |
| chr6:114998565 | 6   | 114.9986 | 0.002604341 | Credible Set | purple |
| chr6:115226366 | 6   | 115.2264 | 0.003853860 | Credible Set | purple |
| chr6:115226669 | 6   | 115.2267 | 0.004757316 | Credible Set | purple |
| chr6:115247801 | 6   | 115.2478 | 0.004285612 | Credible Set | purple |
| chr6:115266235 | 6   | 115.2662 | 0.004280605 | Credible Set | purple |
| chr6:115266236 | 6   | 115.2662 | 0.004280605 | Credible Set | purple |
| chr6:115335743 | 6   | 115.3357 | 0.004584876 | Credible Set | purple |
| chr6:115489819 | 6   | 115.4898 | 0.024827641 | Credible Set | purple |
| chr6:115505788 | 6   | 115.5058 | 0.022858162 | Credible Set | purple |
| chr6:115549490 | 6   | 115.5495 | 0.015233174 | Credible Set | purple |
| chr6:115549730 | 6   | 115.5497 | 0.010993232 | Credible Set | purple |
| chr6:115549829 | 6   | 115.5498 | 0.011657837 | Credible Set | purple |
| chr6:115555634 | 6   | 115.5556 | 0.012298781 | Credible Set | purple |
| chr6:115559836 | 6   | 115.5598 | 0.013108472 | Credible Set | purple |
| chr6:115567453 | 6   | 115.5675 | 0.012346112 | Credible Set | purple |
| chr6:115569261 | 6   | 115.5693 | 0.011983096 | Credible Set | purple |

## Fine-mapping Regions

| snp            | chr | pos (Mb) | pp          | group        | color  |
|----------------|-----|----------|-------------|--------------|--------|
| chr6:115593481 | 6   | 115.5935 | 0.012497097 | Credible Set | purple |
| chr6:115603445 | 6   | 115.6034 | 0.012270603 | Credible Set | purple |
| chr6:115723557 | 6   | 115.7236 | 0.011626473 | Credible Set | purple |
| chr6:115723602 | 6   | 115.7236 | 0.011370495 | Credible Set | purple |
| chr6:115729470 | 6   | 115.7295 | 0.011895550 | Credible Set | purple |
| chr6:115729519 | 6   | 115.7295 | 0.012059737 | Credible Set | purple |
| chr6:115730587 | 6   | 115.7306 | 0.012469945 | Credible Set | purple |
| chr6:115736586 | 6   | 115.7366 | 0.012746512 | Credible Set | purple |
| chr6:115743744 | 6   | 115.7437 | 0.013425921 | Credible Set | purple |
| chr6:115744308 | 6   | 115.7443 | 0.011092578 | Credible Set | purple |
| chr6:115744336 | 6   | 115.7443 | 0.011125369 | Credible Set | purple |
| chr6:115744487 | 6   | 115.7445 | 0.014961390 | Credible Set | purple |
| chr6:115744493 | 6   | 115.7445 | 0.014961390 | Credible Set | purple |
| chr6:115797352 | 6   | 115.7974 | 0.005191679 | Credible Set | purple |
| chr6:115801564 | 6   | 115.8016 | 0.017575283 | Credible Set | purple |
| chr6:115813387 | 6   | 115.8134 | 0.018687205 | Credible Set | purple |
| chr6:115813904 | 6   | 115.8139 | 0.014919512 | Credible Set | purple |
| chr6:115850524 | 6   | 115.8505 | 0.008200616 | Credible Set | purple |
| chr6:115850541 | 6   | 115.8505 | 0.008200616 | Credible Set | purple |
| chr6:115850586 | 6   | 115.8506 | 0.013474106 | Credible Set | purple |
| chr6:115864297 | 6   | 115.8643 | 0.016939179 | Credible Set | purple |
| chr6:115880648 | 6   | 115.8806 | 0.011075584 | Credible Set | purple |
| chr6:115919848 | 6   | 115.9198 | 0.011599903 | Credible Set | purple |
| chr6:115920287 | 6   | 115.9203 | 0.011878528 | Credible Set | purple |
| chr6:115928586 | 6   | 115.9286 | 0.011849687 | Credible Set | purple |
| chr6:115929540 | 6   | 115.9295 | 0.011907240 | Credible Set | purple |
| chr6:115957904 | 6   | 115.9579 | 0.012676989 | Credible Set | purple |
| chr6:115967362 | 6   | 115.9674 | 0.012196402 | Credible Set | purple |
| chr6:115967880 | 6   | 115.9679 | 0.012247326 | Credible Set | purple |
| chr6:115983898 | 6   | 115.9839 | 0.019331309 | Credible Set | purple |
| chr6:115983910 | 6   | 115.9839 | 0.019279810 | Credible Set | purple |
| chr6:115983923 | 6   | 115.9839 | 0.019326769 | Credible Set | purple |
| chr6:115983929 | 6   | 115.9839 | 0.019268930 | Credible Set | purple |
| chr6:115985523 | 6   | 115.9855 | 0.012243389 | Credible Set | purple |
| chr6:115985527 | 6   | 115.9855 | 0.012243389 | Credible Set | purple |
| chr6:115985543 | 6   | 115.9855 | 0.012243389 | Credible Set | purple |

Fine-mapping Regions

| snp            | chr | pos (Mb) | pp          | group        | color  |
|----------------|-----|----------|-------------|--------------|--------|
| chr6:115985717 | 6   | 115.9857 | 0.013400852 | Credible Set | purple |
| chr6:116003809 | 6   | 116.0038 | 0.014130965 | Credible Set | purple |
| chr6:116004432 | 6   | 116.0044 | 0.014339466 | Credible Set | purple |
| chr6:116009041 | 6   | 116.0090 | 0.017016046 | Credible Set | purple |
| chr6:116009081 | 6   | 116.0091 | 0.016958752 | Credible Set | purple |
| chr6:116014484 | 6   | 116.0145 | 0.015354426 | Credible Set | purple |
| chr6:116246960 | 6   | 116.2470 | 0.002524237 | Credible Set | purple |
| chr6:116246991 | 6   | 116.2470 | 0.002584386 | Credible Set | purple |
| chr6:116535049 | 6   | 116.5350 | 0.013881652 | Credible Set | purple |
| chr6:116655672 | 6   | 116.6557 | 0.014593999 | Credible Set | purple |
| chr6:116655715 | 6   | 116.6557 | 0.014593999 | Credible Set | purple |
| chr6:116675286 | 6   | 116.6753 | 0.014579158 | Credible Set | purple |
| chr6:116679618 | 6   | 116.6796 | 0.015884492 | Credible Set | purple |
| chr6:116698225 | 6   | 116.6982 | 0.013505759 | Credible Set | purple |
| chr6:116716073 | 6   | 116.7161 | 0.022190232 | Credible Set | purple |
| chr6:116763618 | 6   | 116.7636 | 0.008509094 | Credible Set | purple |
| chr6:116763629 | 6   | 116.7636 | 0.005349393 | Credible Set | purple |
| chr6:116769198 | 6   | 116.7692 | 0.014822402 | Credible Set | purple |
| chr6:116769221 | 6   | 116.7692 | 0.013191775 | Credible Set | purple |
| chr6:116791717 | 6   | 116.7917 | 0.013875766 | Credible Set | purple |
| chr6:116791844 | 6   | 116.7918 | 0.012414677 | Credible Set | purple |
| chr6:116791847 | 6   | 116.7918 | 0.012414677 | Credible Set | purple |
| chr6:116797564 | 6   | 116.7976 | 0.011861166 | Credible Set | purple |

F34 GBS, iron content in spleen

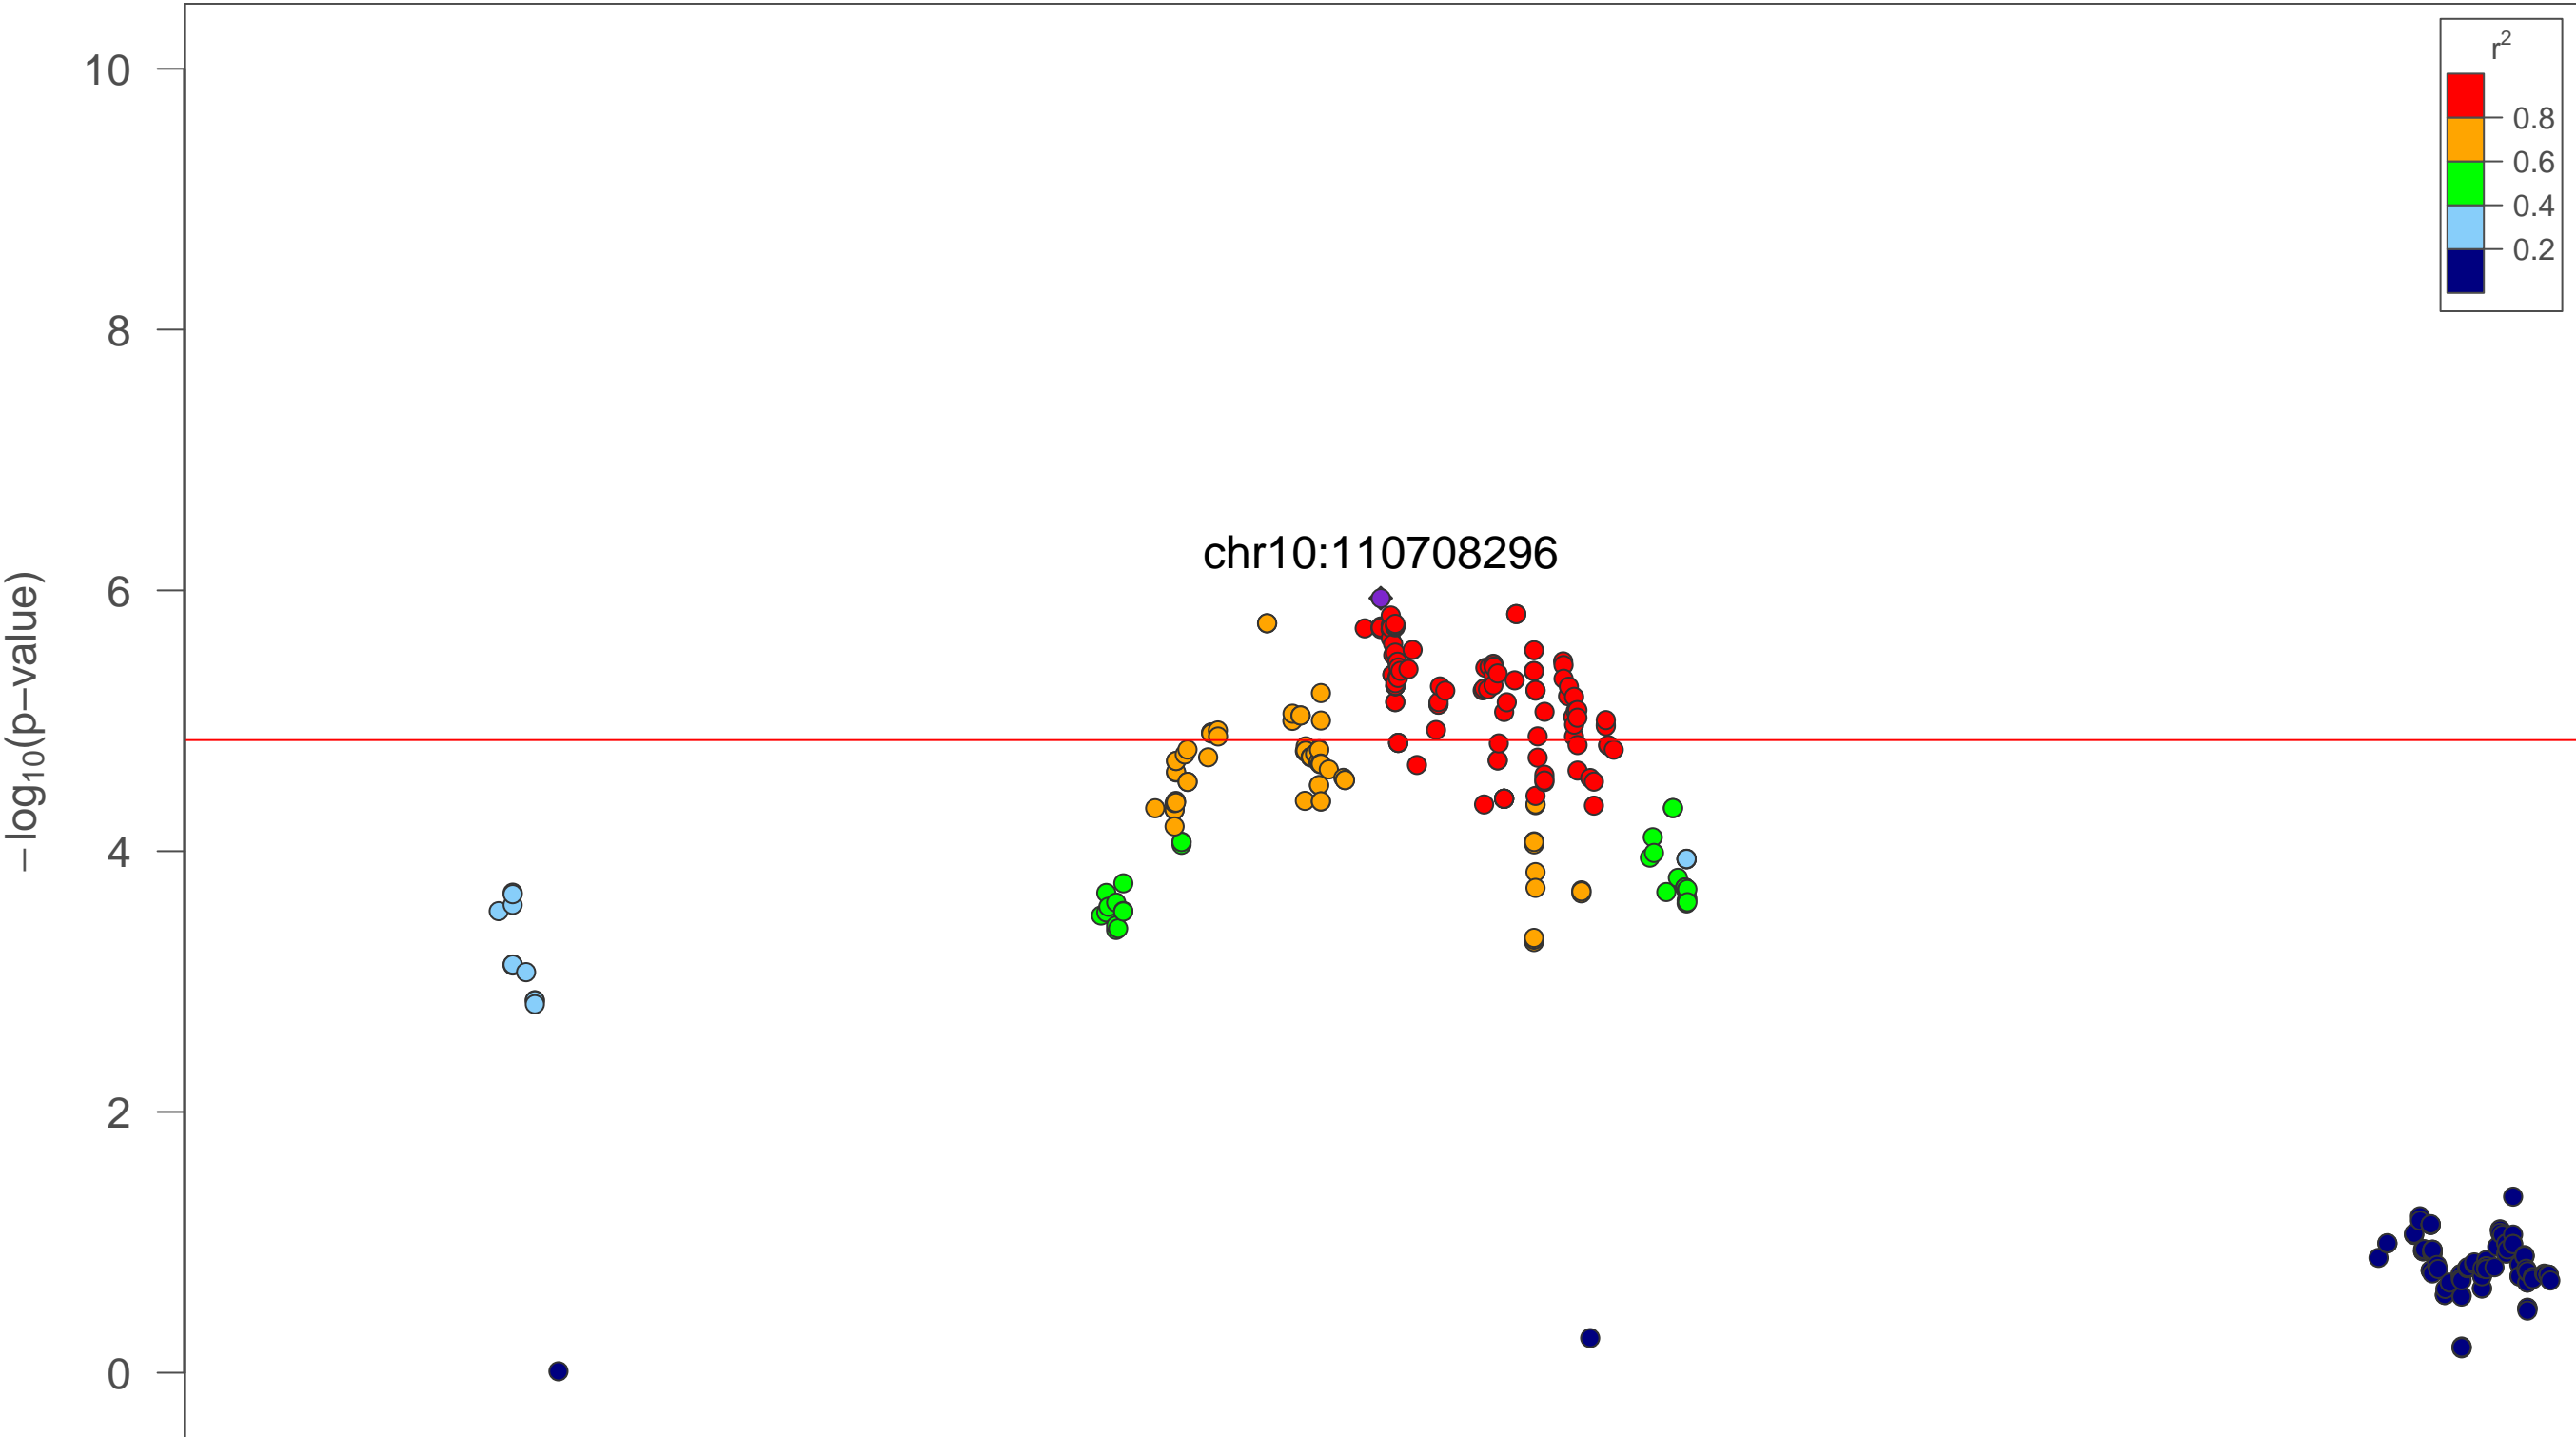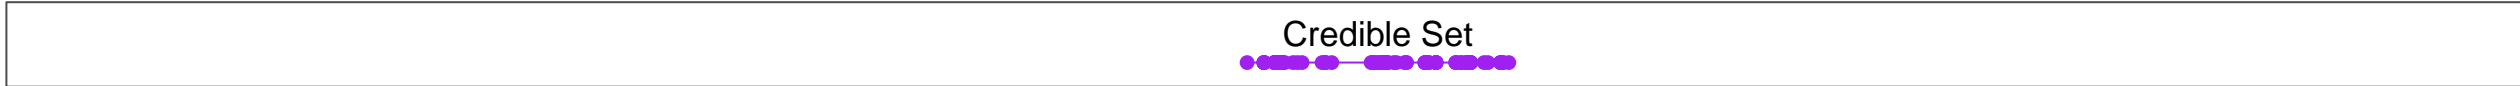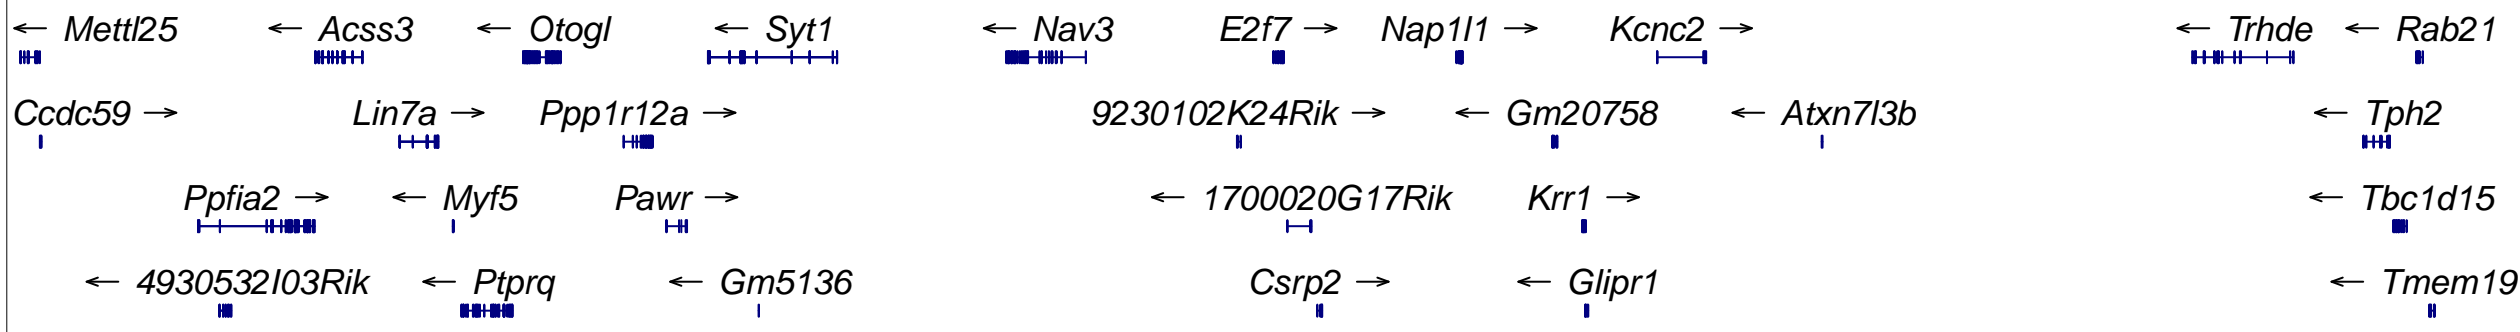

16 genes  
omitted

date: Thu Oct 25 17:16:38 2018

build: F34GBS

display range: chr10:105708296–115708296 [105708296–115708296]

hilite range: 0 – 0 [ 0 – 0 ]

reference SNP: chr10:110708296

number of SNPs plotted: 326

min P-value: 1.15E–6 [chr10:110708296]

max P-value: 9.74E–1 [chr10:107272725]

omitted Genes: Myf6, Gm29685, Zdhhc17

omitted Genes: Osbpl8, Bbs10, Gm5176

omitted Genes: Phlda1, 4933440J02Rik, Glipr1l1

omitted Genes: Glipr1l2, Caps2, 1700010J16Rik

omitted Genes: Thap2, Zfc3h1, Lgr5

omitted Genes: A930009A15Rik



## Fine-mapping Regions

| snp             | chr | pos (Mb) | pp          | group        | color  |
|-----------------|-----|----------|-------------|--------------|--------|
| chr10:110641142 | 10  | 110.6411 | 0.021106003 | Credible Set | purple |
| chr10:110708014 | 10  | 110.7080 | 0.021106003 | Credible Set | purple |
| chr10:110708268 | 10  | 110.7083 | 0.021106003 | Credible Set | purple |
| chr10:110708269 | 10  | 110.7083 | 0.021106003 | Credible Set | purple |
| chr10:110708296 | 10  | 110.7083 | 0.041103762 | Credible Set | purple |
| chr10:110708628 | 10  | 110.7086 | 0.021106003 | Credible Set | purple |
| chr10:110749349 | 10  | 110.7493 | 0.021106003 | Credible Set | purple |
| chr10:110749883 | 10  | 110.7499 | 0.021106003 | Credible Set | purple |
| chr10:110749995 | 10  | 110.7500 | 0.021106003 | Credible Set | purple |
| chr10:110750029 | 10  | 110.7500 | 0.021106003 | Credible Set | purple |
| chr10:110750810 | 10  | 110.7508 | 0.021106003 | Credible Set | purple |
| chr10:110756900 | 10  | 110.7569 | 0.010853198 | Credible Set | purple |
| chr10:110757011 | 10  | 110.7570 | 0.010853198 | Credible Set | purple |
| chr10:110759826 | 10  | 110.7598 | 0.014300794 | Credible Set | purple |
| chr10:110760381 | 10  | 110.7604 | 0.014300794 | Credible Set | purple |
| chr10:110768547 | 10  | 110.7685 | 0.014300794 | Credible Set | purple |
| chr10:110768747 | 10  | 110.7687 | 0.006351267 | Credible Set | purple |
| chr10:110768762 | 10  | 110.7688 | 0.006351267 | Credible Set | purple |
| chr10:110768830 | 10  | 110.7688 | 0.021106003 | Credible Set | purple |
| chr10:110768858 | 10  | 110.7689 | 0.021106003 | Credible Set | purple |
| chr10:110768862 | 10  | 110.7689 | 0.021106003 | Credible Set | purple |
| chr10:110768863 | 10  | 110.7689 | 0.021106003 | Credible Set | purple |
| chr10:110768865 | 10  | 110.7689 | 0.021106003 | Credible Set | purple |
| chr10:110769342 | 10  | 110.7693 | 0.008764239 | Credible Set | purple |
| chr10:110769400 | 10  | 110.7694 | 0.008764239 | Credible Set | purple |
| chr10:110769437 | 10  | 110.7694 | 0.008764239 | Credible Set | purple |
| chr10:110769467 | 10  | 110.7695 | 0.008764239 | Credible Set | purple |
| chr10:110769523 | 10  | 110.7695 | 0.008764239 | Credible Set | purple |
| chr10:110769585 | 10  | 110.7696 | 0.008764239 | Credible Set | purple |
| chr10:110778078 | 10  | 110.7781 | 0.010853198 | Credible Set | purple |
| chr10:110778106 | 10  | 110.7781 | 0.010853198 | Credible Set | purple |
| chr10:110778366 | 10  | 110.7784 | 0.008764239 | Credible Set | purple |
| chr10:110780233 | 10  | 110.7802 | 0.008764239 | Credible Set | purple |
| chr10:110781079 | 10  | 110.7811 | 0.003067331 | Credible Set | purple |
| chr10:110781085 | 10  | 110.7811 | 0.003067331 | Credible Set | purple |
| chr10:110781088 | 10  | 110.7811 | 0.003067331 | Credible Set | purple |

## Fine-mapping Regions

| snp             | chr | pos (Mb) | pp          | group        | color  |
|-----------------|-----|----------|-------------|--------------|--------|
| chr10:110782063 | 10  | 110.7821 | 0.010853198 | Credible Set | purple |
| chr10:110790601 | 10  | 110.7906 | 0.010853198 | Credible Set | purple |
| chr10:110824052 | 10  | 110.8241 | 0.010853198 | Credible Set | purple |
| chr10:110841372 | 10  | 110.8414 | 0.014300794 | Credible Set | purple |
| chr10:110859622 | 10  | 110.8596 | 0.002129620 | Credible Set | purple |
| chr10:110939251 | 10  | 110.9393 | 0.003794960 | Credible Set | purple |
| chr10:110949219 | 10  | 110.9492 | 0.005589947 | Credible Set | purple |
| chr10:110949220 | 10  | 110.9492 | 0.005589947 | Credible Set | purple |
| chr10:110949581 | 10  | 110.9496 | 0.006351267 | Credible Set | purple |
| chr10:110955372 | 10  | 110.9554 | 0.008764239 | Credible Set | purple |
| chr10:110977680 | 10  | 110.9777 | 0.007360562 | Credible Set | purple |
| chr10:111134114 | 10  | 111.1341 | 0.007360562 | Credible Set | purple |
| chr10:111139942 | 10  | 111.1399 | 0.007360562 | Credible Set | purple |
| chr10:111139969 | 10  | 111.1400 | 0.007360562 | Credible Set | purple |
| chr10:111145119 | 10  | 111.1451 | 0.010853198 | Credible Set | purple |
| chr10:111156216 | 10  | 111.1562 | 0.007360562 | Credible Set | purple |
| chr10:111162654 | 10  | 111.1627 | 0.010853198 | Credible Set | purple |
| chr10:111178371 | 10  | 111.1784 | 0.010853198 | Credible Set | purple |
| chr10:111178404 | 10  | 111.1784 | 0.010853198 | Credible Set | purple |
| chr10:111179231 | 10  | 111.1792 | 0.010853198 | Credible Set | purple |
| chr10:111179272 | 10  | 111.1793 | 0.008764239 | Credible Set | purple |
| chr10:111180485 | 10  | 111.1805 | 0.010853198 | Credible Set | purple |
| chr10:111180489 | 10  | 111.1805 | 0.010853198 | Credible Set | purple |
| chr10:111196665 | 10  | 111.1967 | 0.010853198 | Credible Set | purple |
| chr10:111196850 | 10  | 111.1968 | 0.002331899 | Credible Set | purple |
| chr10:111196872 | 10  | 111.1969 | 0.002331899 | Credible Set | purple |
| chr10:111201273 | 10  | 111.2013 | 0.003067331 | Credible Set | purple |
| chr10:111223748 | 10  | 111.2237 | 0.004994810 | Credible Set | purple |
| chr10:111234804 | 10  | 111.2348 | 0.006351267 | Credible Set | purple |
| chr10:111267516 | 10  | 111.2675 | 0.008764239 | Credible Set | purple |
| chr10:111274460 | 10  | 111.2745 | 0.021106003 | Credible Set | purple |
| chr10:111274480 | 10  | 111.2745 | 0.021106003 | Credible Set | purple |
| chr10:111347458 | 10  | 111.3475 | 0.010853198 | Credible Set | purple |
| chr10:111348661 | 10  | 111.3487 | 0.010853198 | Credible Set | purple |
| chr10:111348802 | 10  | 111.3488 | 0.014300794 | Credible Set | purple |
| chr10:111354708 | 10  | 111.3547 | 0.007360562 | Credible Set | purple |

## Fine-mapping Regions

| snp             | chr | pos (Mb) | pp          | group        | color  |
|-----------------|-----|----------|-------------|--------------|--------|
| chr10:111363662 | 10  | 111.3637 | 0.003515896 | Credible Set | purple |
| chr10:111363665 | 10  | 111.3637 | 0.002448640 | Credible Set | purple |
| chr10:111391890 | 10  | 111.3919 | 0.001752614 | Credible Set | purple |
| chr10:111391901 | 10  | 111.3919 | 0.001637499 | Credible Set | purple |
| chr10:111391954 | 10  | 111.3920 | 0.001816659 | Credible Set | purple |
| chr10:111391955 | 10  | 111.3920 | 0.001637499 | Credible Set | purple |
| chr10:111392557 | 10  | 111.3926 | 0.004994810 | Credible Set | purple |
| chr10:111470144 | 10  | 111.4701 | 0.010853198 | Credible Set | purple |
| chr10:111471816 | 10  | 111.4718 | 0.010853198 | Credible Set | purple |
| chr10:111471933 | 10  | 111.4719 | 0.008764239 | Credible Set | purple |
| chr10:111490761 | 10  | 111.4908 | 0.007360562 | Credible Set | purple |
| chr10:111494112 | 10  | 111.4941 | 0.008764239 | Credible Set | purple |
| chr10:111512151 | 10  | 111.5122 | 0.004994810 | Credible Set | purple |
| chr10:111515685 | 10  | 111.5157 | 0.003515896 | Credible Set | purple |
| chr10:111516056 | 10  | 111.5161 | 0.004123623 | Credible Set | purple |
| chr10:111516061 | 10  | 111.5161 | 0.006351267 | Credible Set | purple |
| chr10:111522846 | 10  | 111.5228 | 0.005589947 | Credible Set | purple |
| chr10:111529740 | 10  | 111.5297 | 0.005589947 | Credible Set | purple |
| chr10:111529759 | 10  | 111.5298 | 0.004994810 | Credible Set | purple |
| chr10:111530393 | 10  | 111.5304 | 0.003067331 | Credible Set | purple |
| chr10:111530397 | 10  | 111.5304 | 0.001960384 | Credible Set | purple |
| chr10:111583278 | 10  | 111.5833 | 0.001752614 | Credible Set | purple |
| chr10:111598785 | 10  | 111.5988 | 0.001637499 | Credible Set | purple |
| chr10:111648540 | 10  | 111.6485 | 0.004123623 | Credible Set | purple |
| chr10:111648550 | 10  | 111.6486 | 0.004123623 | Credible Set | purple |
| chr10:111648631 | 10  | 111.6486 | 0.004516542 | Credible Set | purple |
| chr10:111658438 | 10  | 111.6584 | 0.003067331 | Credible Set | purple |
| chr10:111658509 | 10  | 111.6585 | 0.003067331 | Credible Set | purple |
| chr10:111681517 | 10  | 111.6815 | 0.002722361 | Credible Set | purple |

# F34 GBS, iron content in spleen z score

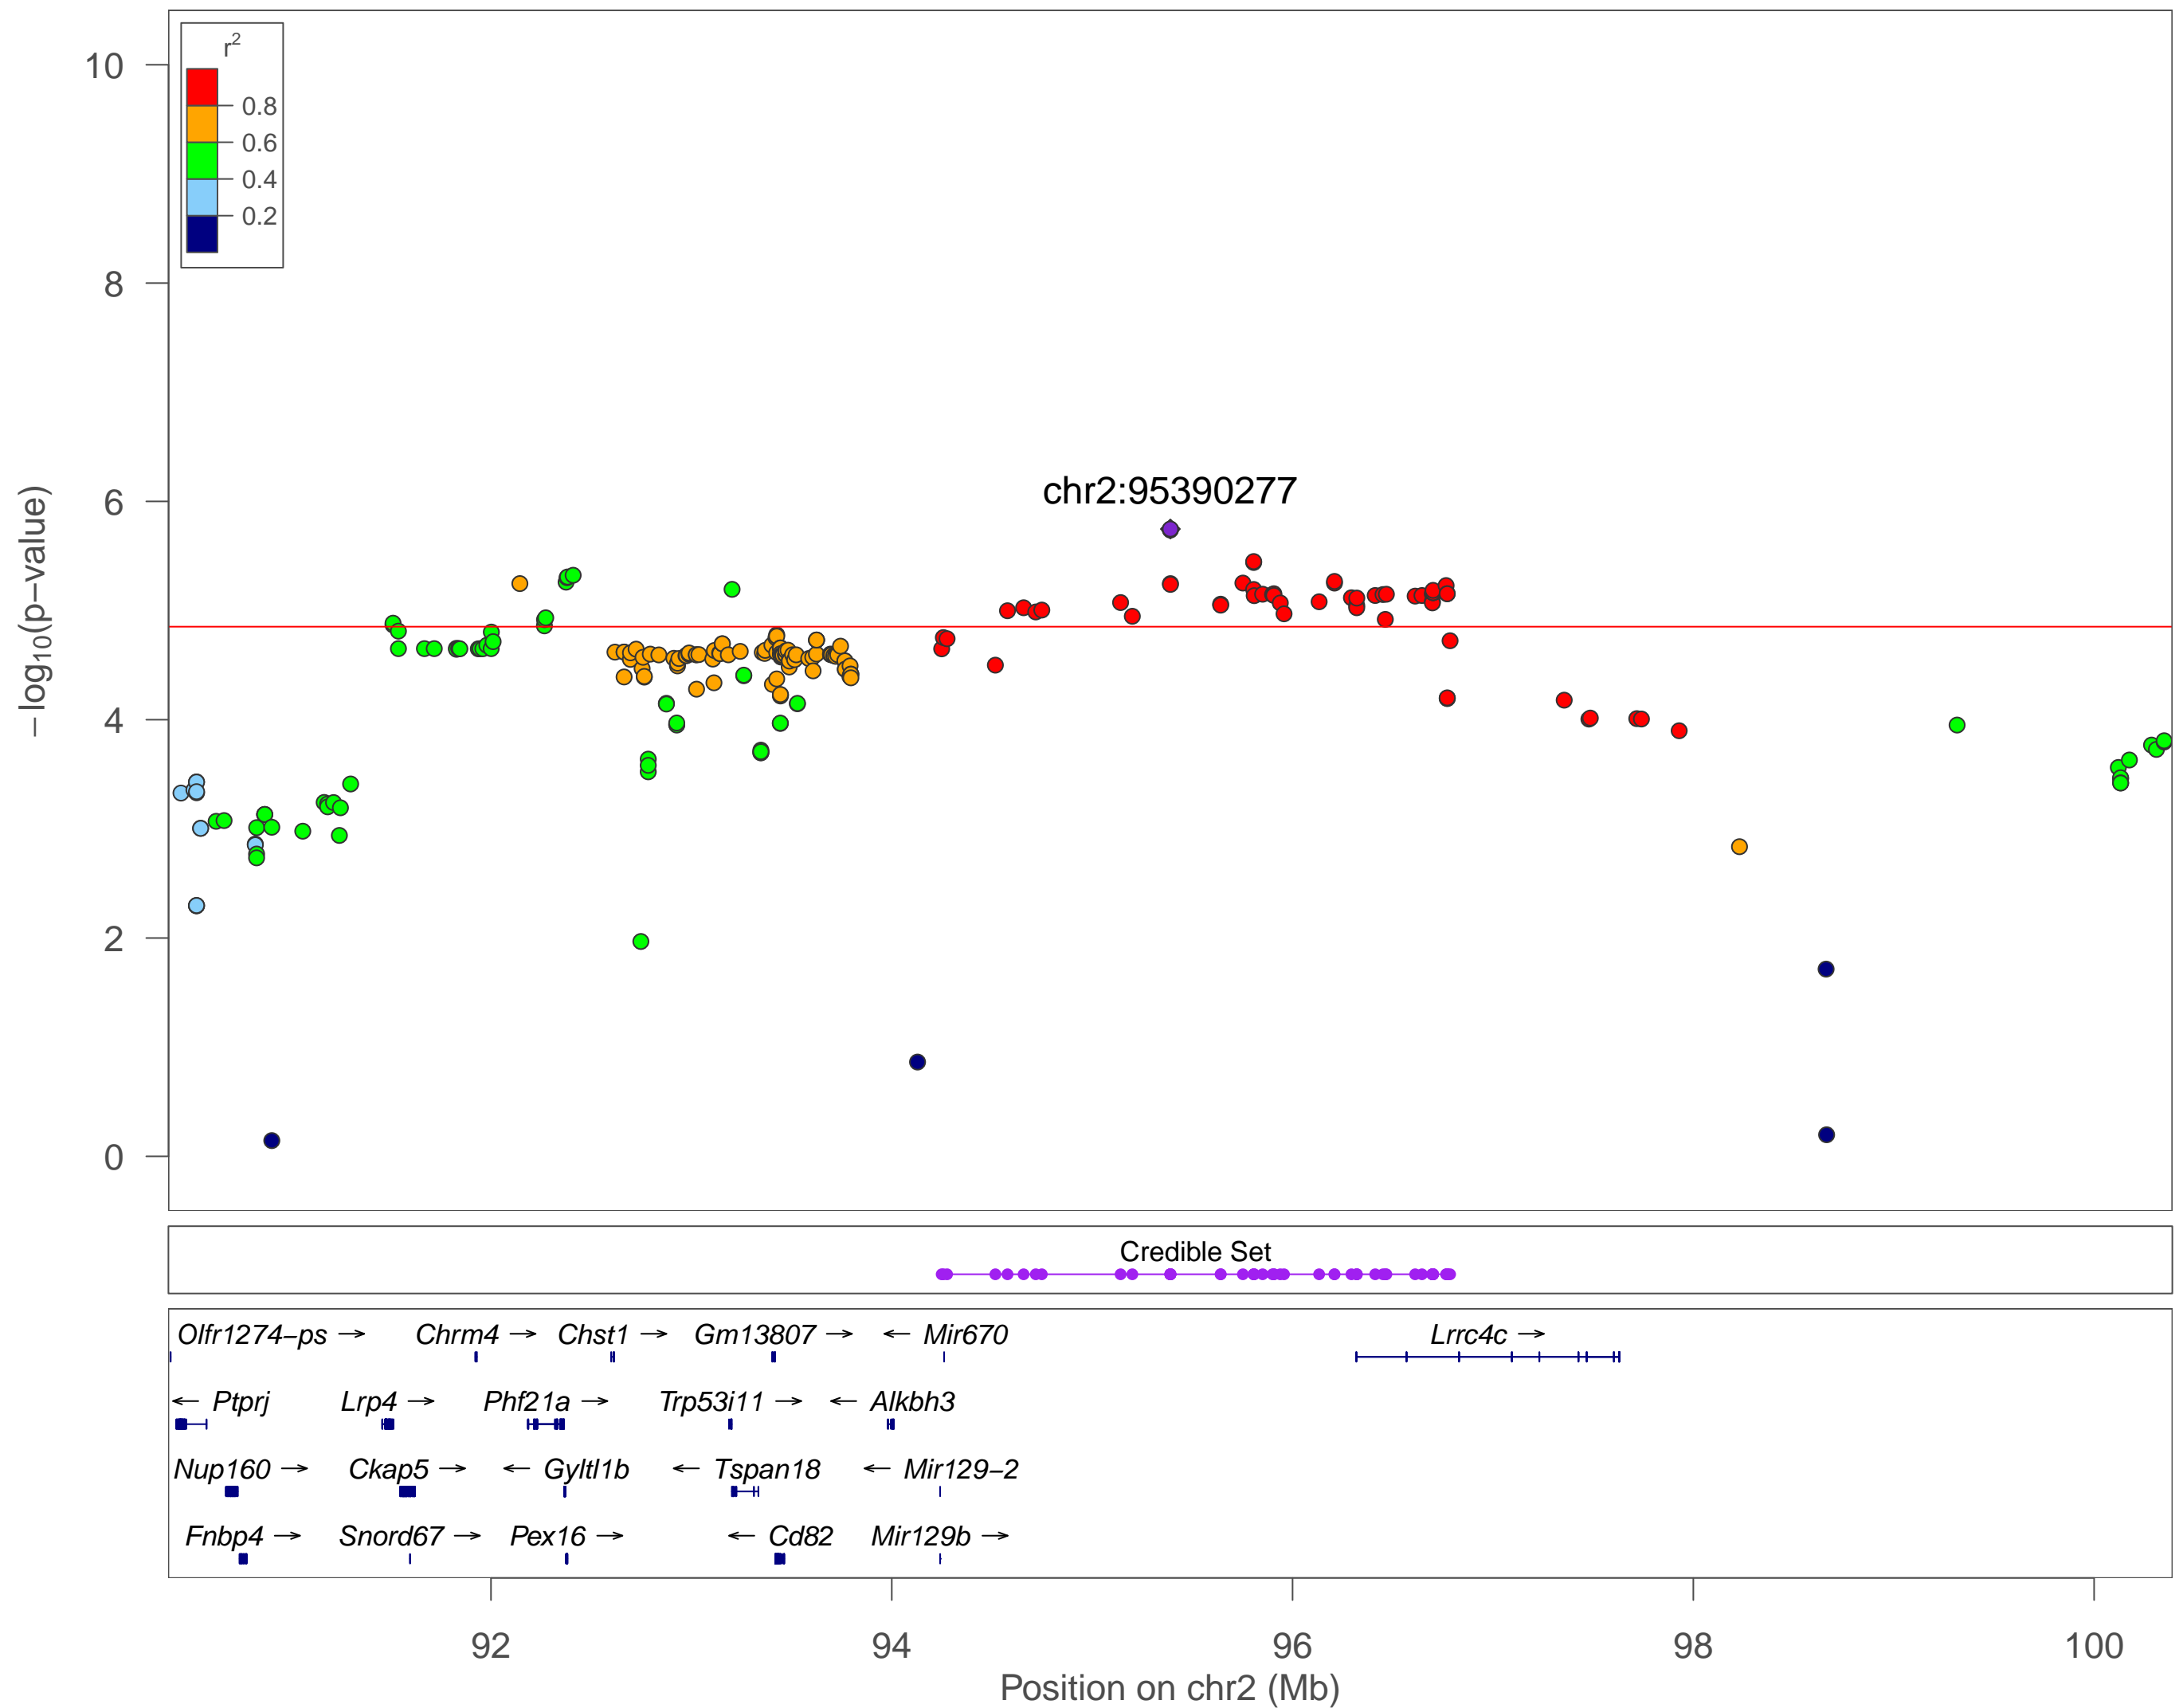

date: Thu Oct 25 17:17:49 2018  
build: F34GBS  
display range: chr2:90390277–100390277 [90390277–100390277]  
hilite range: 0 – 0 [ 0 – 0 ]  
reference SNP: chr2:95390277  
number of SNPs plotted: 248  
min P-value: 1.79E–6 [chr2:95390277]  
max P-value: 7.17E–1 [chr2:90906135]  
omitted Genes: Agbl2, Mtch2, C1qtnf4  
omitted Genes: Ndufs3, Kbtbd4, Ptpmt1  
omitted Genes: Celf1, Rapsn, Psmc3  
omitted Genes: Slc39a13, Spi1, Mybpc3  
omitted Genes: Madd, Nr1h3, Acp2  
omitted Genes: Ddb2, A330069E16Rik, Pacsin3  
omitted Genes: Arfgap2, 1110051M20Rik, F2  
omitted Genes: Zfp408, Arhgap1, Atg13  
omitted Genes: Harbi1, Ambra1, Mdk  
omitted Genes: Dgkz, Mir6999, Creb3l1  
omitted Genes: Mir1955, 1700029I15Rik, Mapk8ip1  
omitted Genes: Mir7000, Cry2, D930015M05Rik  
omitted Genes: Slc35c1, Mir7221, Mir7222  
omitted Genes: Syt13, Prdm11, 4631405J19Rik  
omitted Genes: Mir7001, Gm10804, Alx4  
omitted Genes: Ext2, Accs, Accsl  
omitted Genes: Gm13889, Alkbh3os1, Hsd17b12  
omitted Genes: Ttc17, 2810002D19Rik, Api5

## Fine-mapping Regions

| snp           | chr | pos (Mb) | pp          | group        | color  |
|---------------|-----|----------|-------------|--------------|--------|
| chr2:94249122 | 2   | 94.24912 | 0.005363639 | Credible Set | purple |
| chr2:94257379 | 2   | 94.25738 | 0.006731559 | Credible Set | purple |
| chr2:94276010 | 2   | 94.27601 | 0.006572847 | Credible Set | purple |
| chr2:94516977 | 2   | 94.51698 | 0.003868297 | Credible Set | purple |
| chr2:94577500 | 2   | 94.57750 | 0.011545684 | Credible Set | purple |
| chr2:94657941 | 2   | 94.65794 | 0.012263420 | Credible Set | purple |
| chr2:94718556 | 2   | 94.71856 | 0.011267592 | Credible Set | purple |
| chr2:94748712 | 2   | 94.74871 | 0.011701742 | Credible Set | purple |
| chr2:95141904 | 2   | 95.14190 | 0.013610171 | Credible Set | purple |
| chr2:95200398 | 2   | 95.20040 | 0.010328782 | Credible Set | purple |
| chr2:95390243 | 2   | 95.39024 | 0.059766693 | Credible Set | purple |
| chr2:95390247 | 2   | 95.39025 | 0.059840800 | Credible Set | purple |
| chr2:95390277 | 2   | 95.39028 | 0.060192977 | Credible Set | purple |
| chr2:95390284 | 2   | 95.39028 | 0.058968519 | Credible Set | purple |
| chr2:95390546 | 2   | 95.39055 | 0.019940281 | Credible Set | purple |
| chr2:95390592 | 2   | 95.39059 | 0.019636641 | Credible Set | purple |
| chr2:95641124 | 2   | 95.64112 | 0.013175078 | Credible Set | purple |
| chr2:95641477 | 2   | 95.64148 | 0.012917785 | Credible Set | purple |
| chr2:95752277 | 2   | 95.75228 | 0.020177296 | Credible Set | purple |
| chr2:95805867 | 2   | 95.80587 | 0.017731199 | Credible Set | purple |
| chr2:95806028 | 2   | 95.80603 | 0.030582477 | Credible Set | purple |
| chr2:95806038 | 2   | 95.80604 | 0.031166796 | Credible Set | purple |
| chr2:95808603 | 2   | 95.80860 | 0.015643848 | Credible Set | purple |
| chr2:95850674 | 2   | 95.85067 | 0.016109648 | Credible Set | purple |
| chr2:95900229 | 2   | 95.90023 | 0.016002886 | Credible Set | purple |
| chr2:95906738 | 2   | 95.90674 | 0.016267898 | Credible Set | purple |
| chr2:95906783 | 2   | 95.90678 | 0.015718414 | Credible Set | purple |
| chr2:95938782 | 2   | 95.93878 | 0.013502048 | Credible Set | purple |
| chr2:95957448 | 2   | 95.95745 | 0.010847978 | Credible Set | purple |
| chr2:96132587 | 2   | 96.13259 | 0.013828976 | Credible Set | purple |
| chr2:96209134 | 2   | 96.20913 | 0.020164104 | Credible Set | purple |
| chr2:96209157 | 2   | 96.20916 | 0.020860168 | Credible Set | purple |
| chr2:96293855 | 2   | 96.29385 | 0.014998462 | Credible Set | purple |
| chr2:96320222 | 2   | 96.32022 | 0.012844909 | Credible Set | purple |
| chr2:96320237 | 2   | 96.32024 | 0.012264114 | Credible Set | purple |
| chr2:96320641 | 2   | 96.32064 | 0.014907873 | Credible Set | purple |

Fine-mapping Regions

| snp           | chr | pos (Mb) | pp          | group        | color  |
|---------------|-----|----------|-------------|--------------|--------|
| chr2:96412425 | 2   | 96.41242 | 0.015702216 | Credible Set | purple |
| chr2:96451438 | 2   | 96.45144 | 0.016002886 | Credible Set | purple |
| chr2:96462914 | 2   | 96.46291 | 0.009700138 | Credible Set | purple |
| chr2:96468064 | 2   | 96.46806 | 0.016103254 | Credible Set | purple |
| chr2:96611762 | 2   | 96.61176 | 0.015506139 | Credible Set | purple |
| chr2:96645727 | 2   | 96.64573 | 0.015691358 | Credible Set | purple |
| chr2:96697256 | 2   | 96.69726 | 0.016234165 | Credible Set | purple |
| chr2:96697871 | 2   | 96.69787 | 0.013936852 | Credible Set | purple |
| chr2:96697872 | 2   | 96.69787 | 0.013527542 | Credible Set | purple |
| chr2:96701045 | 2   | 96.70104 | 0.016647624 | Credible Set | purple |
| chr2:96701070 | 2   | 96.70107 | 0.016647624 | Credible Set | purple |
| chr2:96701077 | 2   | 96.70108 | 0.016647624 | Credible Set | purple |
| chr2:96701079 | 2   | 96.70108 | 0.016647624 | Credible Set | purple |
| chr2:96701166 | 2   | 96.70117 | 0.017405925 | Credible Set | purple |
| chr2:96766199 | 2   | 96.76620 | 0.019191454 | Credible Set | purple |
| chr2:96771761 | 2   | 96.77176 | 0.016261856 | Credible Set | purple |
| chr2:96771791 | 2   | 96.77179 | 0.016262277 | Credible Set | purple |
| chr2:96771900 | 2   | 96.77190 | 0.001994975 | Credible Set | purple |
| chr2:96771931 | 2   | 96.77193 | 0.001982158 | Credible Set | purple |
| chr2:96771968 | 2   | 96.77197 | 0.002010158 | Credible Set | purple |
| chr2:96786046 | 2   | 96.78605 | 0.006313408 | Credible Set | purple |

# F34 GBS, iron content in spleen z score

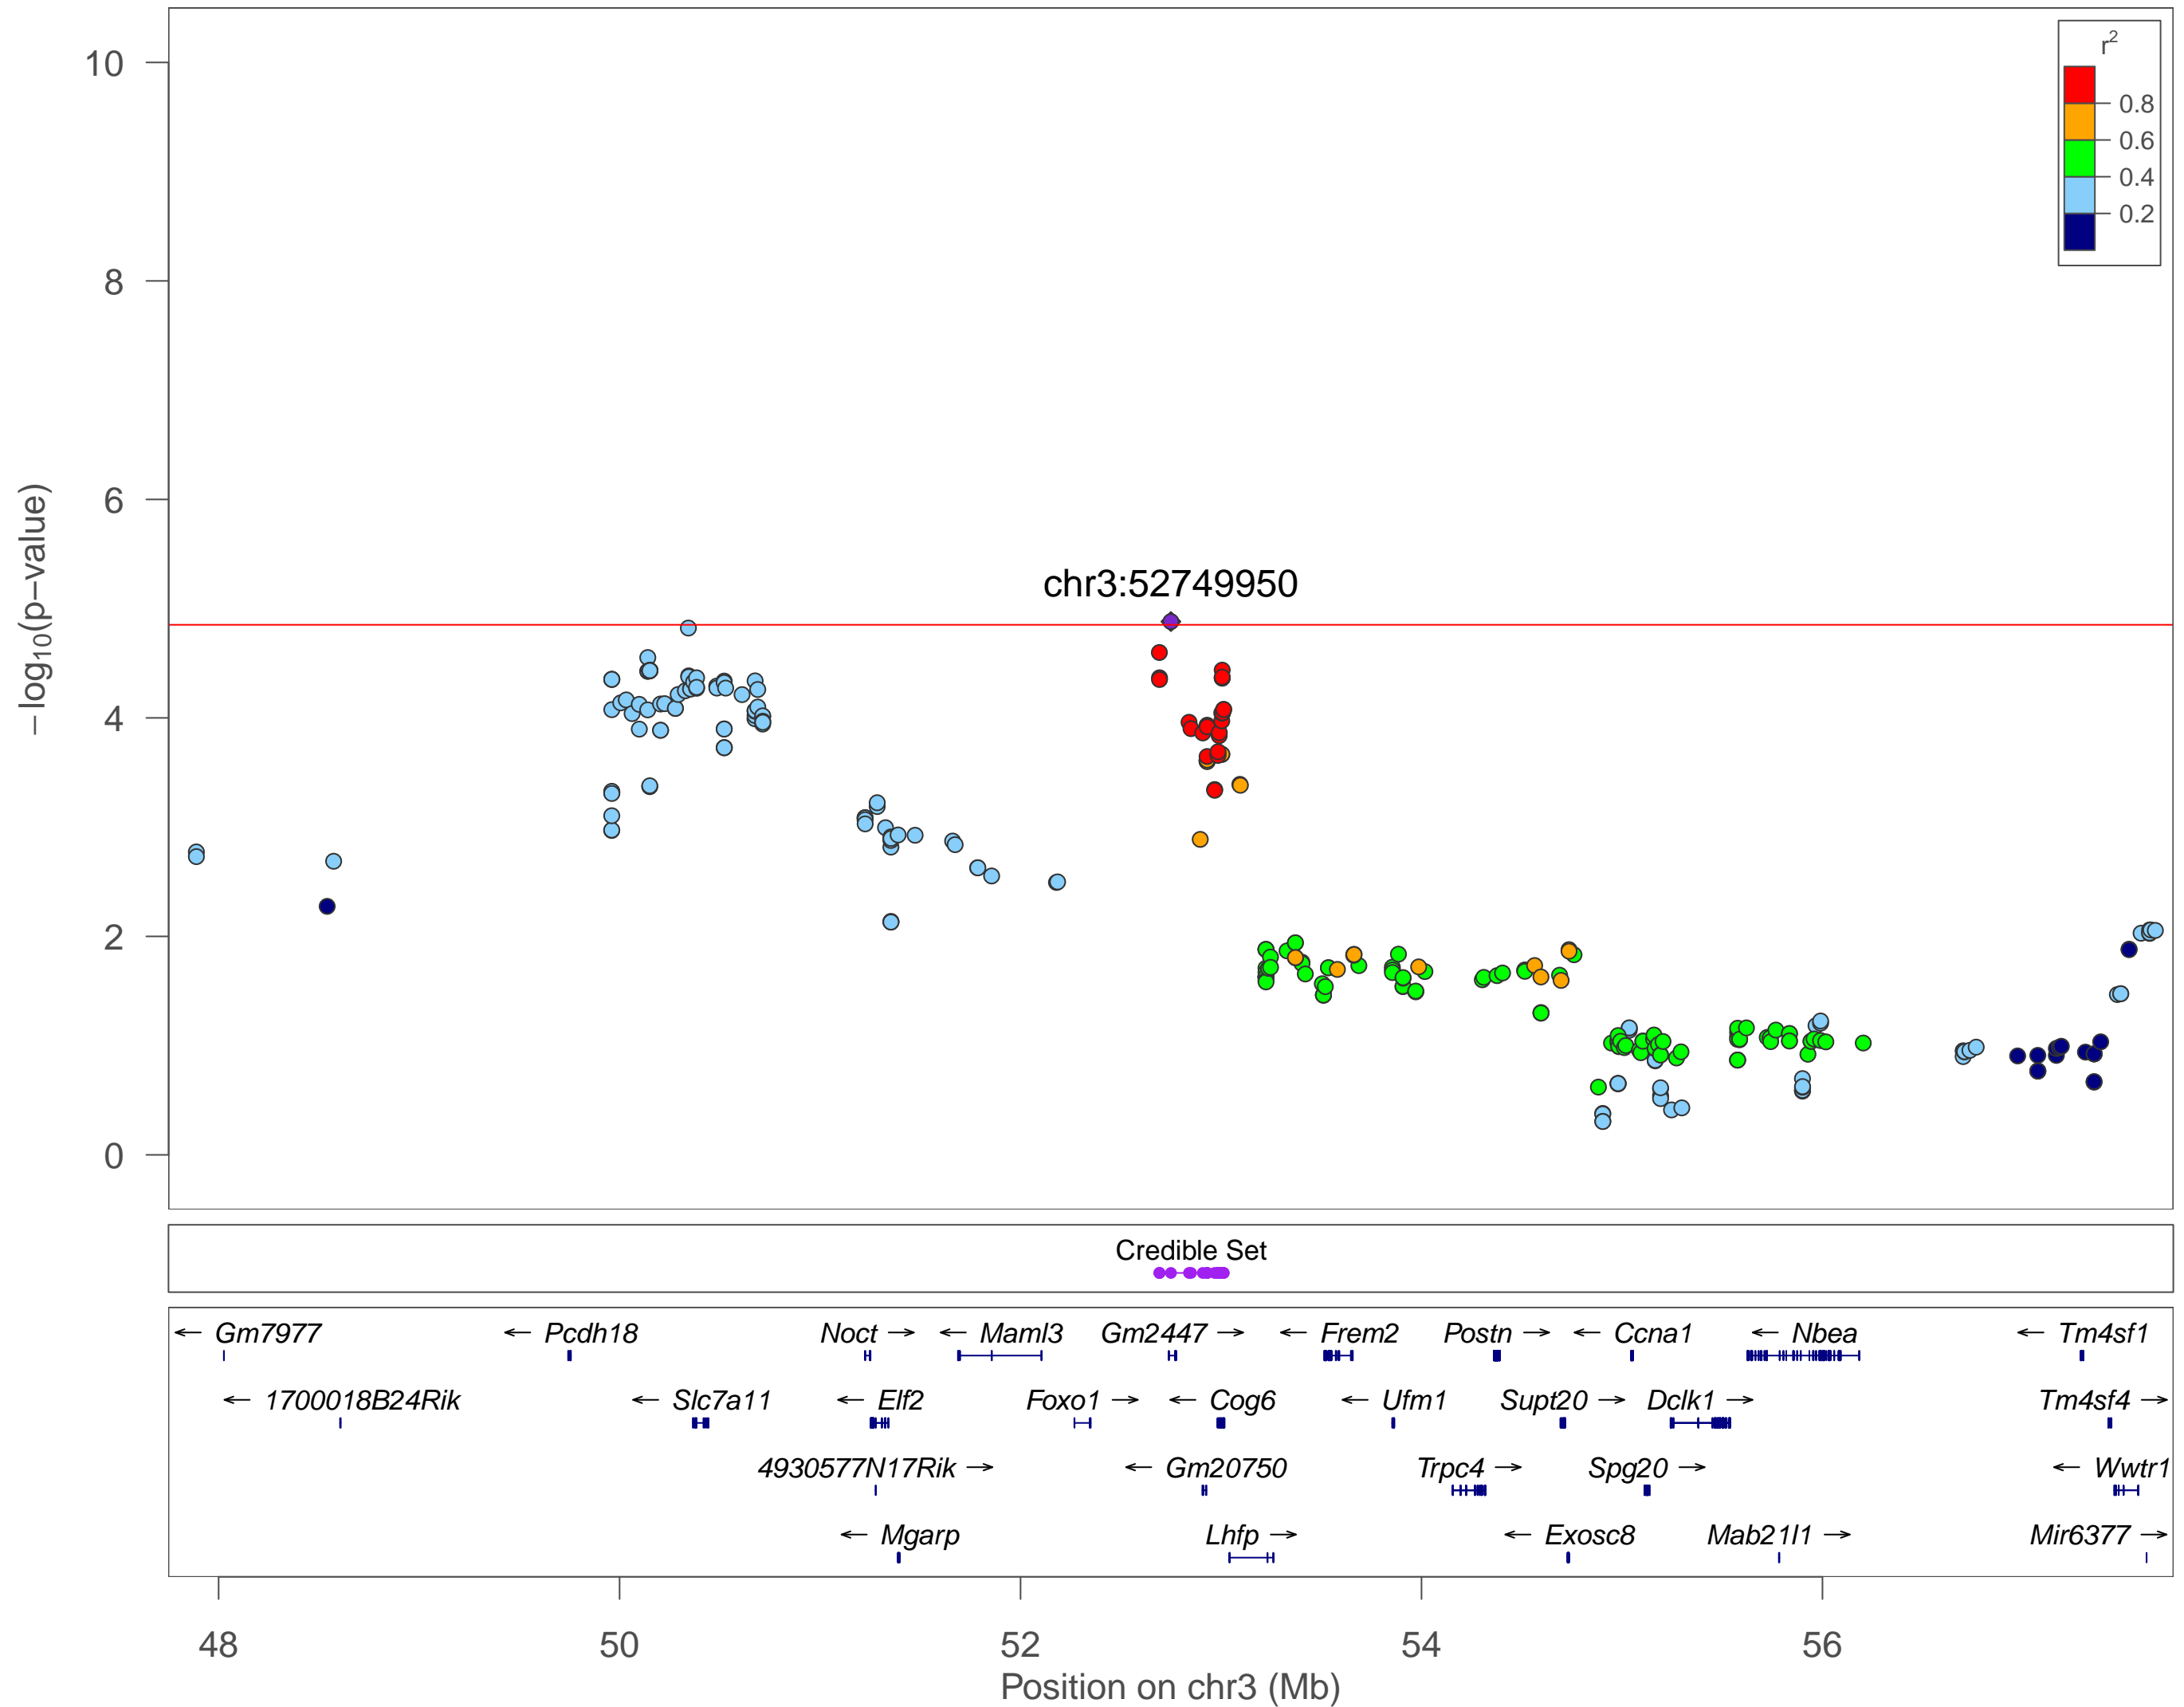



date: Thu Oct 25 17:17:58 2018

build: F34GBS

display range: chr3:47749950–57749950 [47749950–57749950]

hilite range: 0 – 0 [ 0 – 0 ]

reference SNP: chr3:52749950

number of SNPs plotted: 317

min P-value: 1.31E–5 [chr3:52749950]

max P-value: 4.95E–1 [chr3:54904358]

omitted Genes: Ndufc1, Naa15, Rab33b

omitted Genes: Setd7, 5031434O11Rik, Mgst2

omitted Genes: Nhlrc3, Proser1, Stoml3

omitted Genes: Alg5, Smad9, Rfxap

omitted Genes: Sertm1, 4931419H13Rik, Ccdc169

omitted Genes: Sohlh2, 4933417G07Rik, Commd2

omitted Genes: Ankub1, Rnf13

Fine-mapping Regions

| snp           | chr | pos (Mb) | pp          | group        | color  |
|---------------|-----|----------|-------------|--------------|--------|
| chr3:52692409 | 3   | 52.69241 | 0.089838719 | Credible Set | purple |
| chr3:52693102 | 3   | 52.69310 | 0.054132032 | Credible Set | purple |
| chr3:52693118 | 3   | 52.69312 | 0.052301075 | Credible Set | purple |
| chr3:52749950 | 3   | 52.74995 | 0.167096637 | Credible Set | purple |
| chr3:52840387 | 3   | 52.84039 | 0.022309578 | Credible Set | purple |
| chr3:52850138 | 3   | 52.85014 | 0.019643067 | Credible Set | purple |
| chr3:52909024 | 3   | 52.90902 | 0.018037015 | Credible Set | purple |
| chr3:52930454 | 3   | 52.93045 | 0.011306871 | Credible Set | purple |
| chr3:52930496 | 3   | 52.93050 | 0.021032229 | Credible Set | purple |
| chr3:52930984 | 3   | 52.93098 | 0.020376718 | Credible Set | purple |
| chr3:52968213 | 3   | 52.96821 | 0.005893668 | Credible Set | purple |
| chr3:52984307 | 3   | 52.98431 | 0.011980952 | Credible Set | purple |
| chr3:52984901 | 3   | 52.98490 | 0.011558553 | Credible Set | purple |
| chr3:52984912 | 3   | 52.98491 | 0.012424554 | Credible Set | purple |
| chr3:52990872 | 3   | 52.99087 | 0.017071957 | Credible Set | purple |
| chr3:52991306 | 3   | 52.99131 | 0.018133903 | Credible Set | purple |
| chr3:53003556 | 3   | 53.00356 | 0.022927130 | Credible Set | purple |
| chr3:53003614 | 3   | 53.00361 | 0.026843355 | Credible Set | purple |
| chr3:53005849 | 3   | 53.00585 | 0.053732447 | Credible Set | purple |
| chr3:53005874 | 3   | 53.00587 | 0.054050290 | Credible Set | purple |
| chr3:53005885 | 3   | 53.00588 | 0.063157304 | Credible Set | purple |
| chr3:53005909 | 3   | 53.00591 | 0.054810868 | Credible Set | purple |
| chr3:53007126 | 3   | 53.00713 | 0.027090896 | Credible Set | purple |
| chr3:53007129 | 3   | 53.00713 | 0.026948953 | Credible Set | purple |
| chr3:53007177 | 3   | 53.00718 | 0.026948953 | Credible Set | purple |
| chr3:53007214 | 3   | 53.00721 | 0.026987237 | Credible Set | purple |
| chr3:53013134 | 3   | 53.01313 | 0.028823993 | Credible Set | purple |
| chr3:53013153 | 3   | 53.01315 | 0.028734960 | Credible Set | purple |

# F34 GBS, iron content in spleen z score

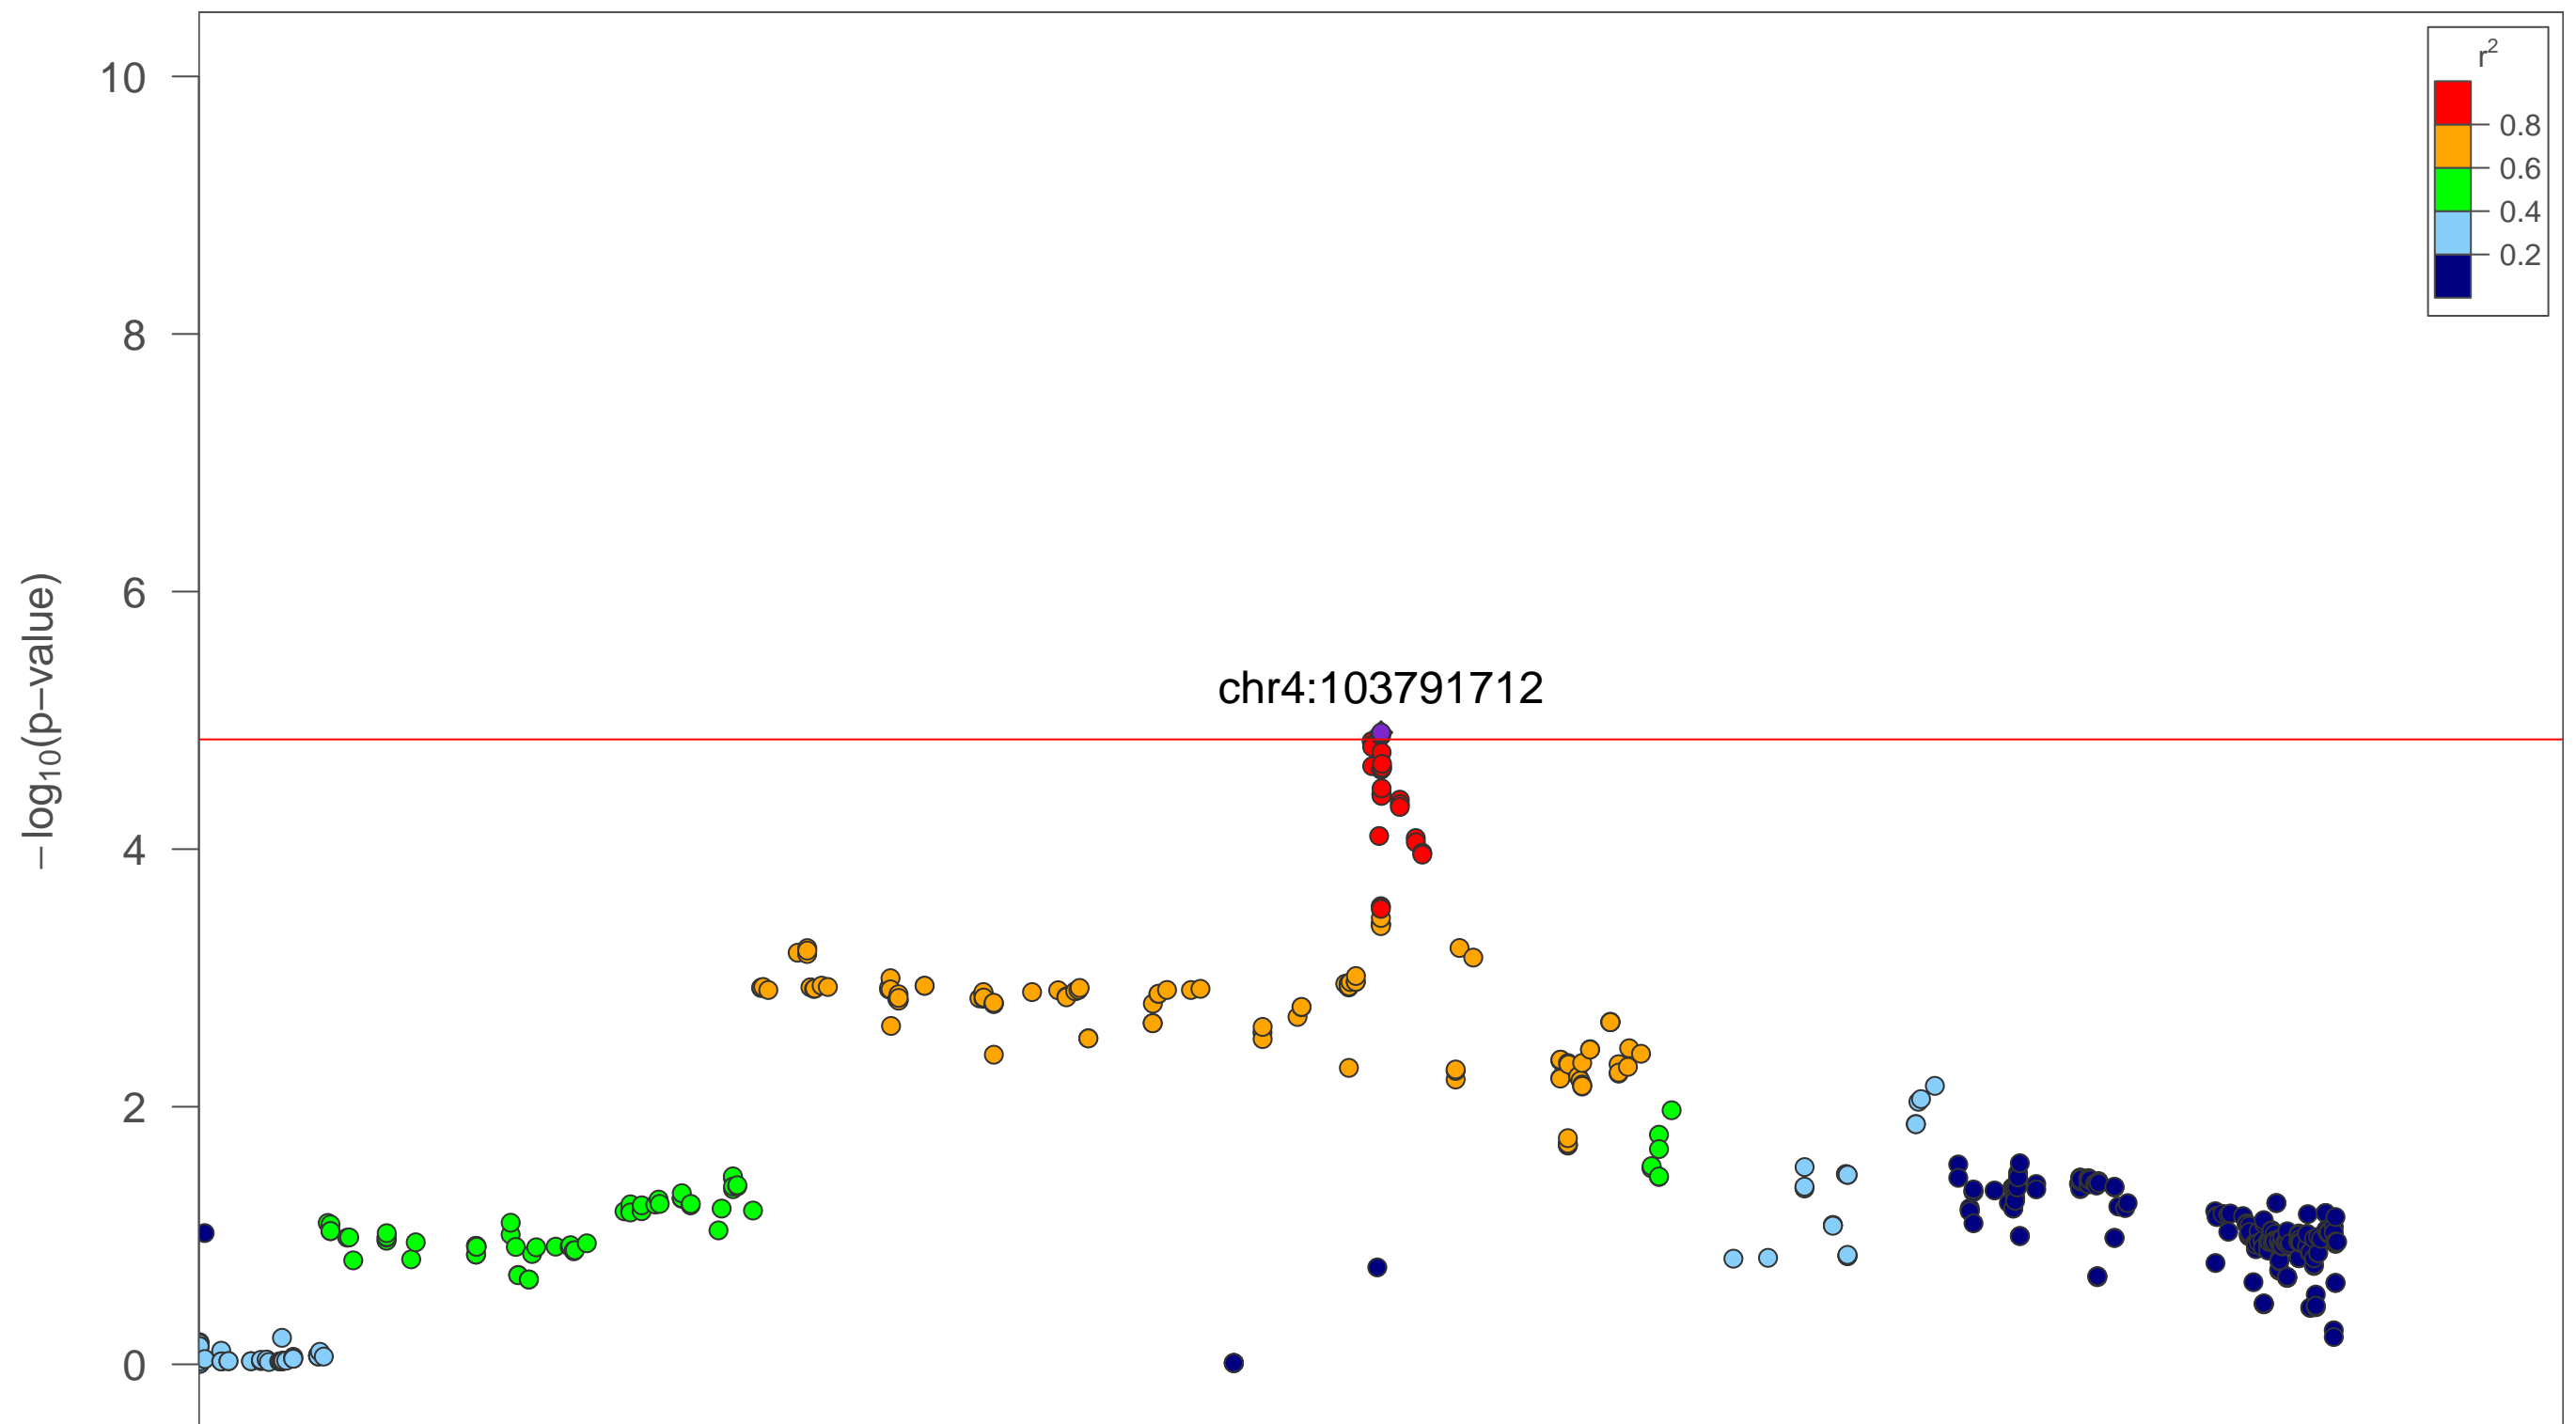

Credible Set

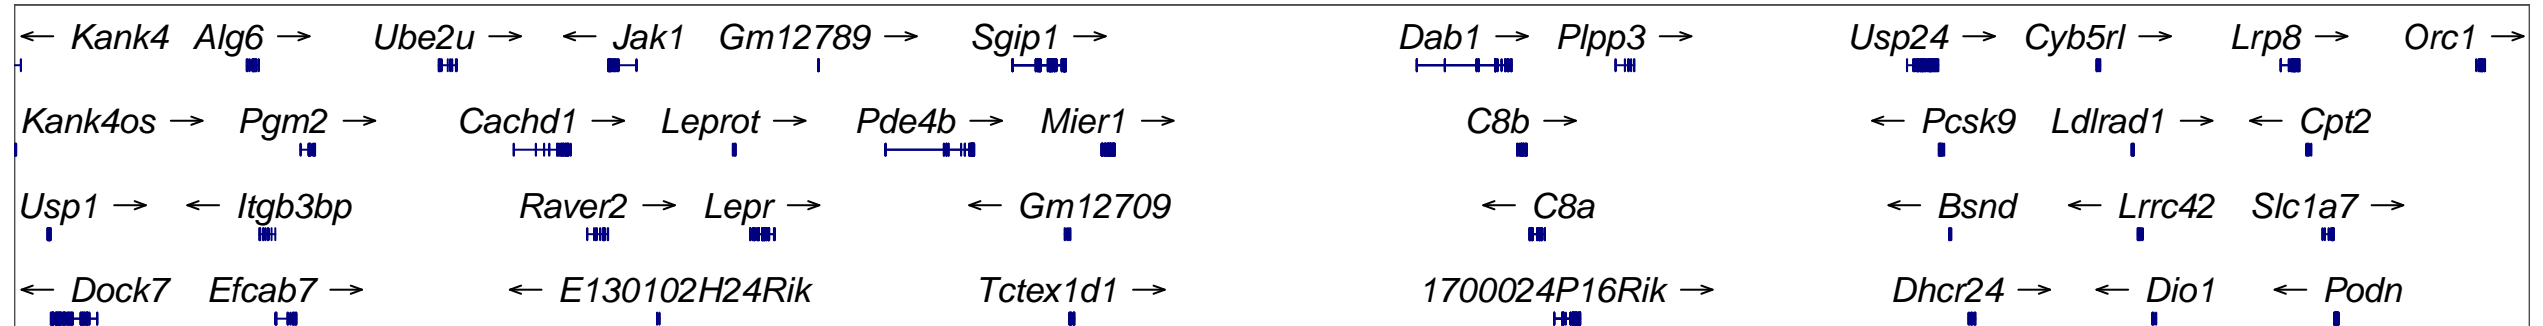

51 genes  
omitted

Position on chr4 (Mb)

date: Thu Oct 25 17:18:07 2018  
build: F34GBS  
display range: chr4:98791712–108791712 [98791712–108791712]  
hilite range: 0 – 0 [ 0 – 0 ]  
reference SNP: chr4:103791712  
number of SNPs plotted: 490  
min P-value: 1.24E–5 [chr4:103791712]  
max P-value: 9.9E–1 [chr4:98796618]  
omitted Genes: Angptl3, Atg4c, Foxd3  
omitted Genes: Ror1, Mir101a, 0610043K17Rik  
omitted Genes: Ak4, Dnajc6, B020004J07Rik  
omitted Genes: Gm12794, BB031773, Insl5  
omitted Genes: Wdr78, Slc35d1, 4921539E11Rik  
omitted Genes: 4930456L15Rik, Oma1, Gm12718  
omitted Genes: Prkaa2, Lexm, Ttc22  
omitted Genes: Pars2, Ttc4, Mroh7  
omitted Genes: Fam151a, Acot11, Ssbp3  
omitted Genes: Mrpl37, Cdcp2, Tceanc2  
omitted Genes: Tmem59, Hspb11, Yipf1  
omitted Genes: Ndc1, Glis1, Dmrtb1  
omitted Genes: Magoh, 0610037L13Rik, 4930407G08Rik  
omitted Genes: Scp2, Mir6397, Echdc2  
omitted Genes: Zyg11a, Zyg11b, Coa7  
omitted Genes: Fam159a, Gpx7, Zcchc11  
omitted Genes: Prpf38a, Cc2d1b, Zfyve9

## Fine-mapping Regions

| snp            | chr | pos (Mb) | pp          | group        | color  |
|----------------|-----|----------|-------------|--------------|--------|
| chr4:103751840 | 4   | 103.7518 | 0.060477508 | Credible Set | purple |
| chr4:103753885 | 4   | 103.7539 | 0.060155313 | Credible Set | purple |
| chr4:103754141 | 4   | 103.7541 | 0.056628681 | Credible Set | purple |
| chr4:103754184 | 4   | 103.7542 | 0.054737834 | Credible Set | purple |
| chr4:103754202 | 4   | 103.7542 | 0.039516345 | Credible Set | purple |
| chr4:103783541 | 4   | 103.7835 | 0.012088639 | Credible Set | purple |
| chr4:103790658 | 4   | 103.7907 | 0.003708715 | Credible Set | purple |
| chr4:103791594 | 4   | 103.7916 | 0.037183308 | Credible Set | purple |
| chr4:103791682 | 4   | 103.7917 | 0.065847398 | Credible Set | purple |
| chr4:103791711 | 4   | 103.7917 | 0.068015582 | Credible Set | purple |
| chr4:103791712 | 4   | 103.7917 | 0.070110846 | Credible Set | purple |
| chr4:103791722 | 4   | 103.7917 | 0.068550001 | Credible Set | purple |
| chr4:103793565 | 4   | 103.7936 | 0.024540983 | Credible Set | purple |
| chr4:103793571 | 4   | 103.7936 | 0.024540983 | Credible Set | purple |
| chr4:103793605 | 4   | 103.7936 | 0.024616382 | Credible Set | purple |
| chr4:103793645 | 4   | 103.7936 | 0.023839493 | Credible Set | purple |
| chr4:103793861 | 4   | 103.7939 | 0.027104748 | Credible Set | purple |
| chr4:103793969 | 4   | 103.7940 | 0.049967021 | Credible Set | purple |
| chr4:103795720 | 4   | 103.7957 | 0.038070727 | Credible Set | purple |
| chr4:103795724 | 4   | 103.7957 | 0.038649946 | Credible Set | purple |
| chr4:103795744 | 4   | 103.7957 | 0.041067485 | Credible Set | purple |
| chr4:103871016 | 4   | 103.8710 | 0.022372760 | Credible Set | purple |
| chr4:103871045 | 4   | 103.8710 | 0.020746898 | Credible Set | purple |
| chr4:103871082 | 4   | 103.8711 | 0.019764792 | Credible Set | purple |
| chr4:103938428 | 4   | 103.9384 | 0.011676744 | Credible Set | purple |
| chr4:103938894 | 4   | 103.9389 | 0.010866450 | Credible Set | purple |
| chr4:103966010 | 4   | 103.9660 | 0.009113775 | Credible Set | purple |
| chr4:103966020 | 4   | 103.9660 | 0.008833631 | Credible Set | purple |

# F34 GBS, iron content in spleen z score

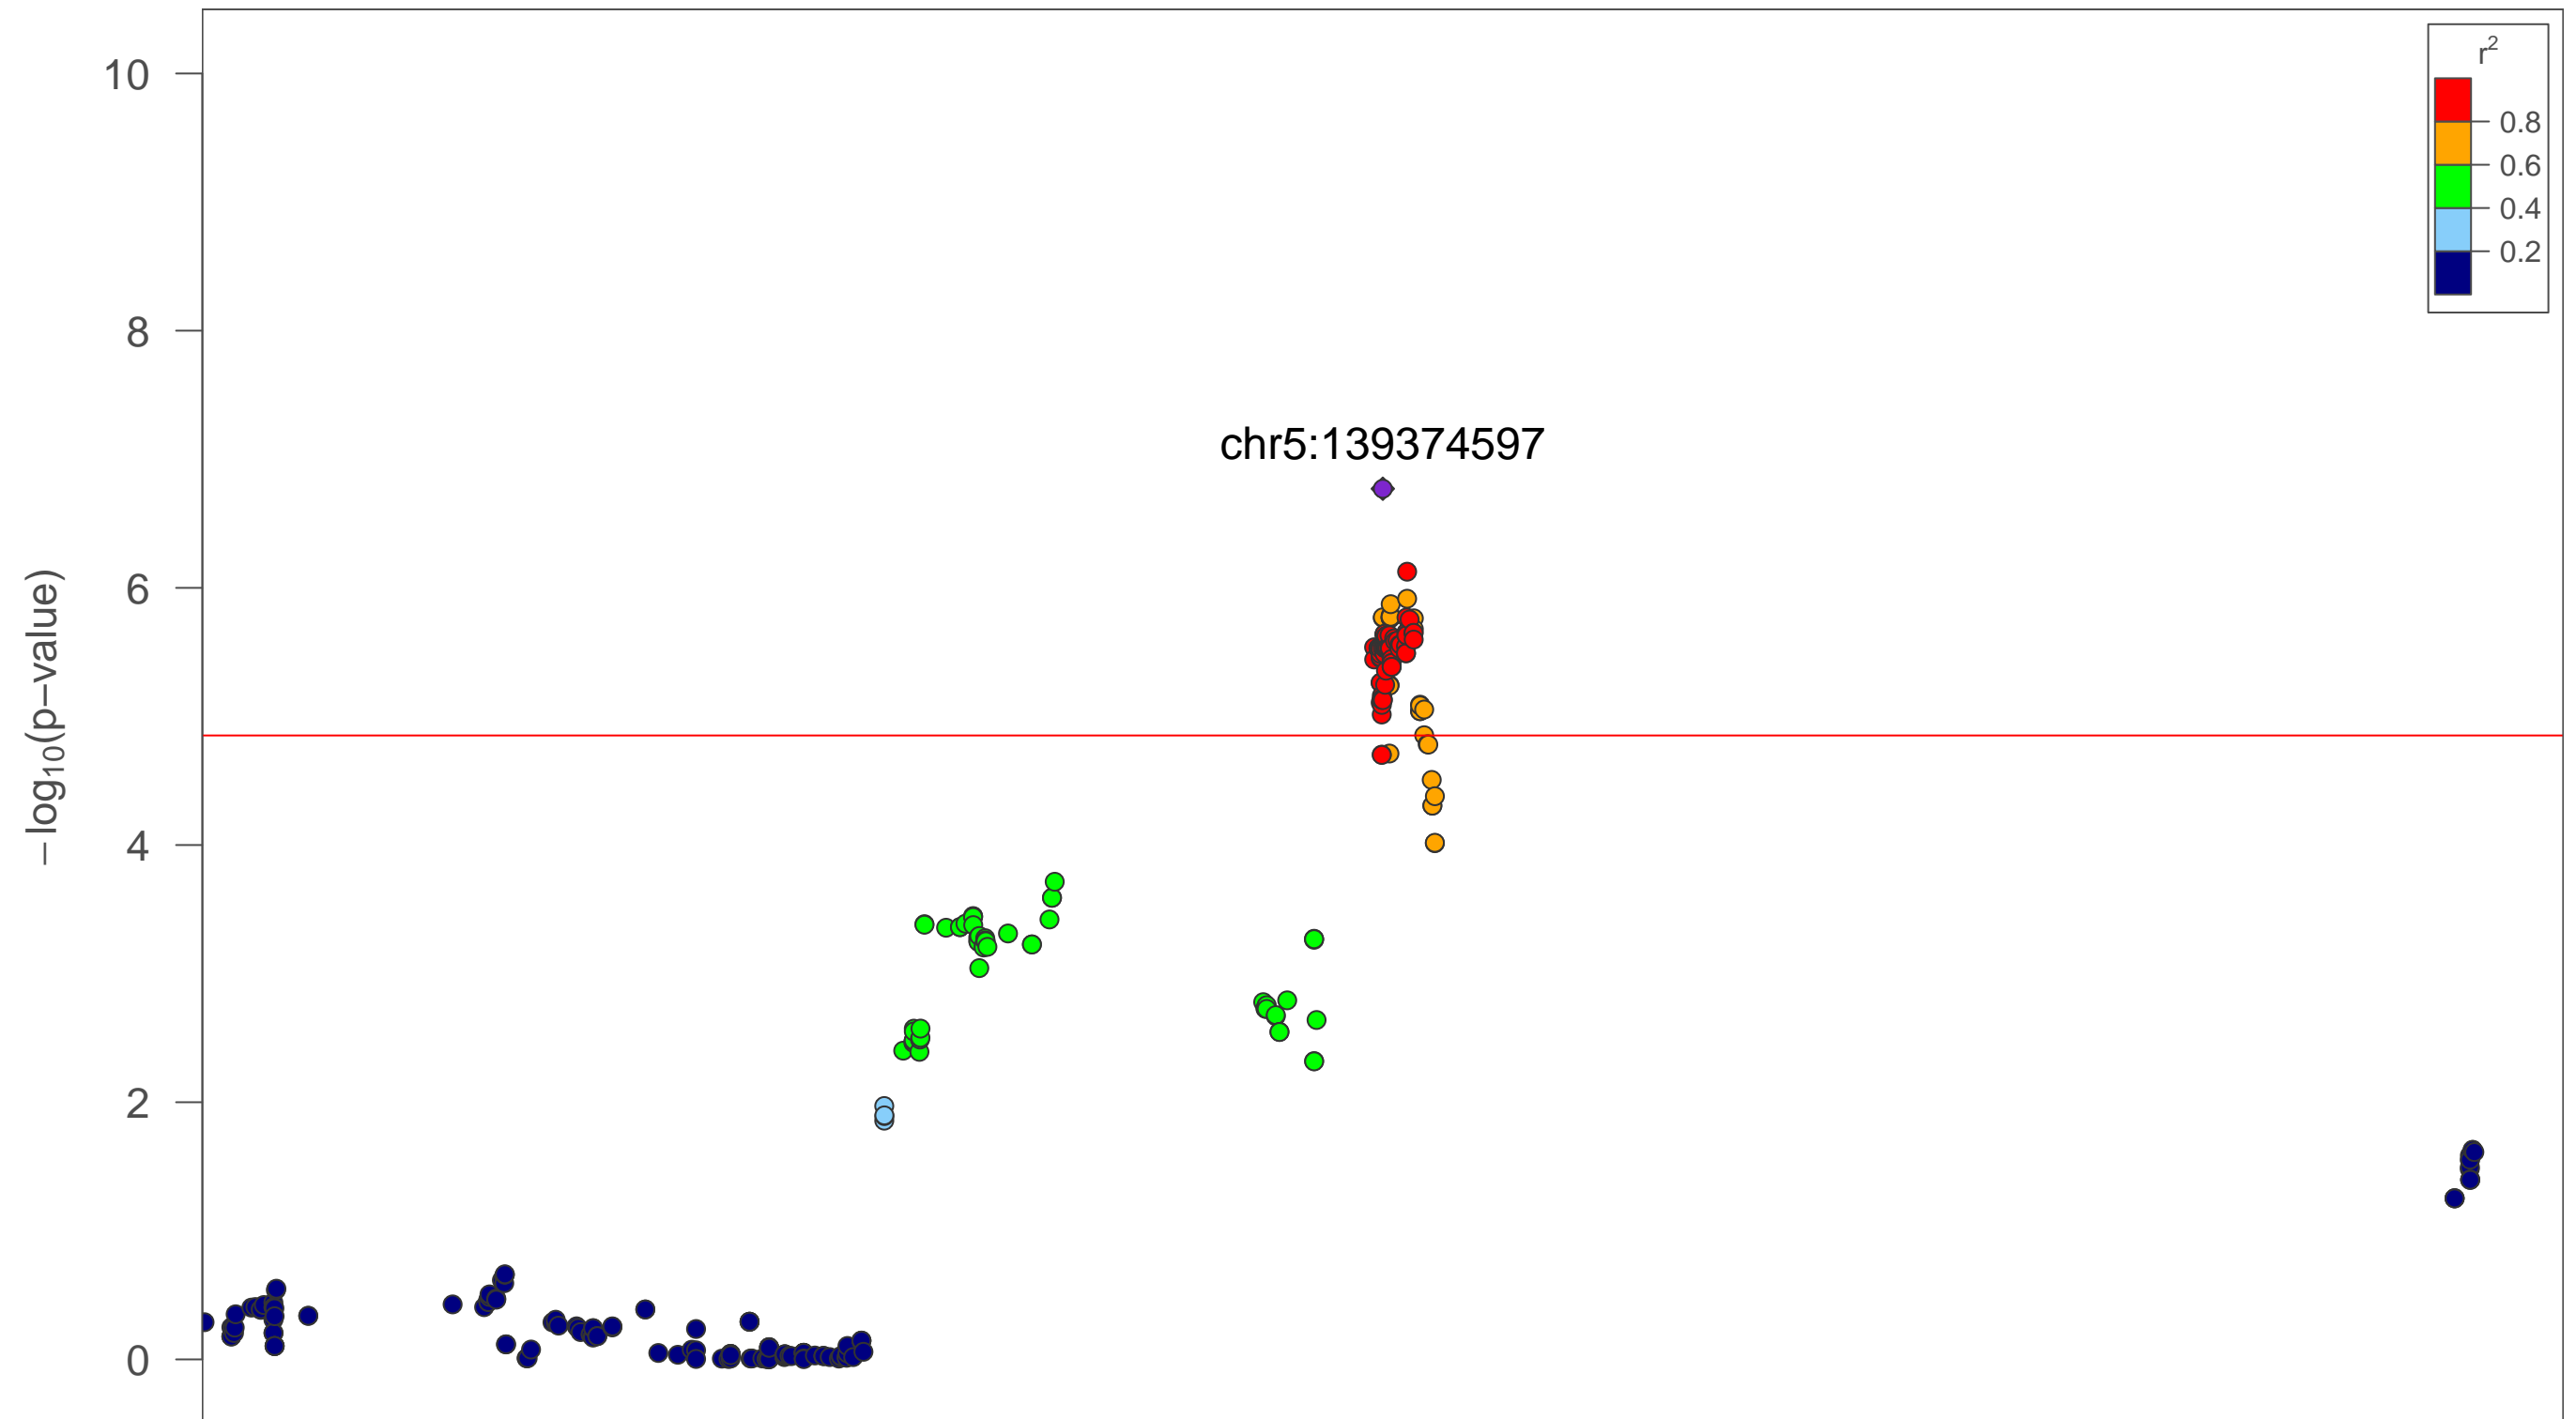

Credible Set

← *Gtf2ird1* ← *Hip1* *Polr2j* → *Ift22* → ← *Epo* ← *Zfp113* ← *Pdgfa* ← *Micall2* *Eif3b* → *Sdk1* → ← *Mmd2* ← *Zdhhc4* ← *Ocm*  
← *Clip2* ← *Fzd9* ← *Ywhag* *Myl10* → ← *Srrt* ← *Gjc3* ← *Zfp68* *Get4* → ← *Elfn1* → ← *Grifin* *Foxk1* → ← *Rbakdn* ← *Aimp2*  
← *Syna* ← *Fkbp6* *Zp3* → ← *Col26a1* *Actl6b* → ← *Taf6* ← *Prkar1b* ← *Ints1* ← *Snx8* *Ap5z1* → ← *Rbak* *Eif2ak1* →  
*Mir7228* → ← *Ccl26* ← *Sh2b2* *Fis1* → *Tfr2* → ← *Mir25* *Dnaaf5* → ← *Mad1l1* ← *Card11* ← *Radil* *Zfp12* → *Pms2* →

167 genes  
omitted

Position on chr5 (Mb)

date: Thu Oct 25 17:18:18 2018

build: F34GBS

display range: chr5:134374597–144374597 [134374597–144374597]

hilite range: 0 – 0 [ 0 – 0 ]

reference SNP: chr5:139374597

number of SNPs plotted: 310

min P-value: 1.7E–7 [chr5:139374597]

max P-value: 10E–1 [chr5:136774656]

omitted Genes: Rfc2, Lat2, Eif4h

omitted Genes: Limk1, Eln, Wbscr28

omitted Genes: Cldn13, Wbscr27, Cldn4

omitted Genes: Cldn3, Wbscr25, Abhd11

omitted Genes: Abhd11os, Stx1a, Wbscr22

omitted Genes: Dnajc30, Vps37d, Mlxipl

omitted Genes: Tbl2, Bcl7b, Baz1b

omitted Genes: Trim50, Nsun5, Pom121

omitted Genes: Mir7033, Ccl24, Rhbdd2

omitted Genes: Por, Tmem120a, Mir7034

omitted Genes: Styxl1, Mdh2, Srrm3

omitted Genes: Hspb1, Ssc4d, Dtx2

omitted Genes: Upk3b, Upk3bl, Rasa4

omitted Genes: Mir7035, Lrwd1, Alkbh4

omitted Genes: Orai2, Prkrip1, Cux1

omitted Genes: Mir721, 4933404O12Rik, Cldn15

omitted Genes: Znhit1, Plod3, Mir702

omitted Genes: Vgf, Ap1s1, Serpine1

omitted Genes: Trim56, Ache, Mir8116

omitted Genes: Ufsp1, Mir7036, Trip6

omitted Genes: Slc12a9, Ephb4, Zan

omitted Genes: Pop7, Gigyf1, Gnb2

omitted Genes: Mir6418, Mospd3, Pcolce

omitted Genes: Fbxo24, Lrch4, Gm20605

omitted Genes: Sap25, Irs3, Agfg2

omitted Genes: Nyap1, Tsc22d4, Ppp1r35

omitted Genes: Mepce, Zcwpw1, Pilra

omitted Genes: Pilrb1, Pilrb2, Cyp3a13

omitted Genes: Azgp1, Smok3a, Smok3b

omitted Genes: Smok3c, Zkscan1, Zscan21

omitted Genes: Cops6, Mcm7, Mir93

omitted Genes: Mir106b, Ap4m1, Cnpy4

Make more plots at <http://csg.sph.umich.edu/locuszoom/>

## Fine-mapping Regions

| snp            | chr | pos (Mb) | pp          | group        | color  |
|----------------|-----|----------|-------------|--------------|--------|
| chr5:139337717 | 5   | 139.3377 | 0.011843849 | Credible Set | purple |
| chr5:139338124 | 5   | 139.3381 | 0.009604424 | Credible Set | purple |
| chr5:139356059 | 5   | 139.3561 | 0.011678110 | Credible Set | purple |
| chr5:139357023 | 5   | 139.3570 | 0.011676185 | Credible Set | purple |
| chr5:139357028 | 5   | 139.3570 | 0.011676185 | Credible Set | purple |
| chr5:139359983 | 5   | 139.3600 | 0.011213880 | Credible Set | purple |
| chr5:139360537 | 5   | 139.3605 | 0.011337767 | Credible Set | purple |
| chr5:139365262 | 5   | 139.3653 | 0.009836049 | Credible Set | purple |
| chr5:139365292 | 5   | 139.3653 | 0.011818085 | Credible Set | purple |
| chr5:139365343 | 5   | 139.3653 | 0.010006669 | Credible Set | purple |
| chr5:139365434 | 5   | 139.3654 | 0.006449839 | Credible Set | purple |
| chr5:139365448 | 5   | 139.3654 | 0.006455095 | Credible Set | purple |
| chr5:139365601 | 5   | 139.3656 | 0.010551312 | Credible Set | purple |
| chr5:139365659 | 5   | 139.3657 | 0.011511756 | Credible Set | purple |
| chr5:139365700 | 5   | 139.3657 | 0.004588735 | Credible Set | purple |
| chr5:139370400 | 5   | 139.3704 | 0.005162146 | Credible Set | purple |
| chr5:139370538 | 5   | 139.3705 | 0.004410022 | Credible Set | purple |
| chr5:139370586 | 5   | 139.3706 | 0.004888566 | Credible Set | purple |
| chr5:139370648 | 5   | 139.3706 | 0.004803120 | Credible Set | purple |
| chr5:139374544 | 5   | 139.3745 | 0.004822292 | Credible Set | purple |
| chr5:139374549 | 5   | 139.3745 | 0.004789127 | Credible Set | purple |
| chr5:139374597 | 5   | 139.3746 | 0.182402395 | Credible Set | purple |
| chr5:139374918 | 5   | 139.3749 | 0.011643184 | Credible Set | purple |
| chr5:139382014 | 5   | 139.3820 | 0.010570673 | Credible Set | purple |
| chr5:139382197 | 5   | 139.3822 | 0.014689264 | Credible Set | purple |
| chr5:139382215 | 5   | 139.3822 | 0.014689264 | Credible Set | purple |
| chr5:139382343 | 5   | 139.3823 | 0.014915282 | Credible Set | purple |
| chr5:139382347 | 5   | 139.3823 | 0.014915282 | Credible Set | purple |
| chr5:139382775 | 5   | 139.3828 | 0.011690070 | Credible Set | purple |
| chr5:139382789 | 5   | 139.3828 | 0.011690070 | Credible Set | purple |
| chr5:139384477 | 5   | 139.3845 | 0.006220628 | Credible Set | purple |
| chr5:139387948 | 5   | 139.3879 | 0.007921164 | Credible Set | purple |
| chr5:139388094 | 5   | 139.3881 | 0.012455759 | Credible Set | purple |
| chr5:139388781 | 5   | 139.3888 | 0.011743918 | Credible Set | purple |
| chr5:139389536 | 5   | 139.3895 | 0.014359155 | Credible Set | purple |
| chr5:139389540 | 5   | 139.3895 | 0.014359155 | Credible Set | purple |



## Fine-mapping Regions

| snp            | chr | pos (Mb) | pp          | group        | color  |
|----------------|-----|----------|-------------|--------------|--------|
| chr5:139389572 | 5   | 139.3896 | 0.014359155 | Credible Set | purple |
| chr5:139389578 | 5   | 139.3896 | 0.014359155 | Credible Set | purple |
| chr5:139391234 | 5   | 139.3912 | 0.011643184 | Credible Set | purple |
| chr5:139391358 | 5   | 139.3914 | 0.011643184 | Credible Set | purple |
| chr5:139395030 | 5   | 139.3950 | 0.011664814 | Credible Set | purple |
| chr5:139402752 | 5   | 139.4028 | 0.014563760 | Credible Set | purple |
| chr5:139403170 | 5   | 139.4032 | 0.011682145 | Credible Set | purple |
| chr5:139404712 | 5   | 139.4047 | 0.011643184 | Credible Set | purple |
| chr5:139404757 | 5   | 139.4048 | 0.011643184 | Credible Set | purple |
| chr5:139404767 | 5   | 139.4048 | 0.011643184 | Credible Set | purple |
| chr5:139411750 | 5   | 139.4118 | 0.009698102 | Credible Set | purple |
| chr5:139411803 | 5   | 139.4118 | 0.008992399 | Credible Set | purple |
| chr5:139411845 | 5   | 139.4118 | 0.008992399 | Credible Set | purple |
| chr5:139411920 | 5   | 139.4119 | 0.009042781 | Credible Set | purple |
| chr5:139412108 | 5   | 139.4121 | 0.008464481 | Credible Set | purple |
| chr5:139412109 | 5   | 139.4121 | 0.008464481 | Credible Set | purple |
| chr5:139422570 | 5   | 139.4226 | 0.013812241 | Credible Set | purple |
| chr5:139426676 | 5   | 139.4267 | 0.013119564 | Credible Set | purple |
| chr5:139437340 | 5   | 139.4373 | 0.013299241 | Credible Set | purple |
| chr5:139445073 | 5   | 139.4451 | 0.012367835 | Credible Set | purple |
| chr5:139445415 | 5   | 139.4454 | 0.011544452 | Credible Set | purple |
| chr5:139449959 | 5   | 139.4500 | 0.012377106 | Credible Set | purple |
| chr5:139472776 | 5   | 139.4728 | 0.012039033 | Credible Set | purple |
| chr5:139472992 | 5   | 139.4730 | 0.010674549 | Credible Set | purple |
| chr5:139472993 | 5   | 139.4730 | 0.010696332 | Credible Set | purple |
| chr5:139474788 | 5   | 139.4748 | 0.015301490 | Credible Set | purple |
| chr5:139474790 | 5   | 139.4748 | 0.014598204 | Credible Set | purple |
| chr5:139474824 | 5   | 139.4748 | 0.014545417 | Credible Set | purple |
| chr5:139474889 | 5   | 139.4749 | 0.019783865 | Credible Set | purple |
| chr5:139477643 | 5   | 139.4776 | 0.043516286 | Credible Set | purple |
| chr5:139488214 | 5   | 139.4882 | 0.019088989 | Credible Set | purple |
| chr5:139504674 | 5   | 139.5047 | 0.015149475 | Credible Set | purple |
| chr5:139505164 | 5   | 139.5052 | 0.015175055 | Credible Set | purple |
| chr5:139505384 | 5   | 139.5054 | 0.013522652 | Credible Set | purple |

# F34 GBS, iron content in spleen z score

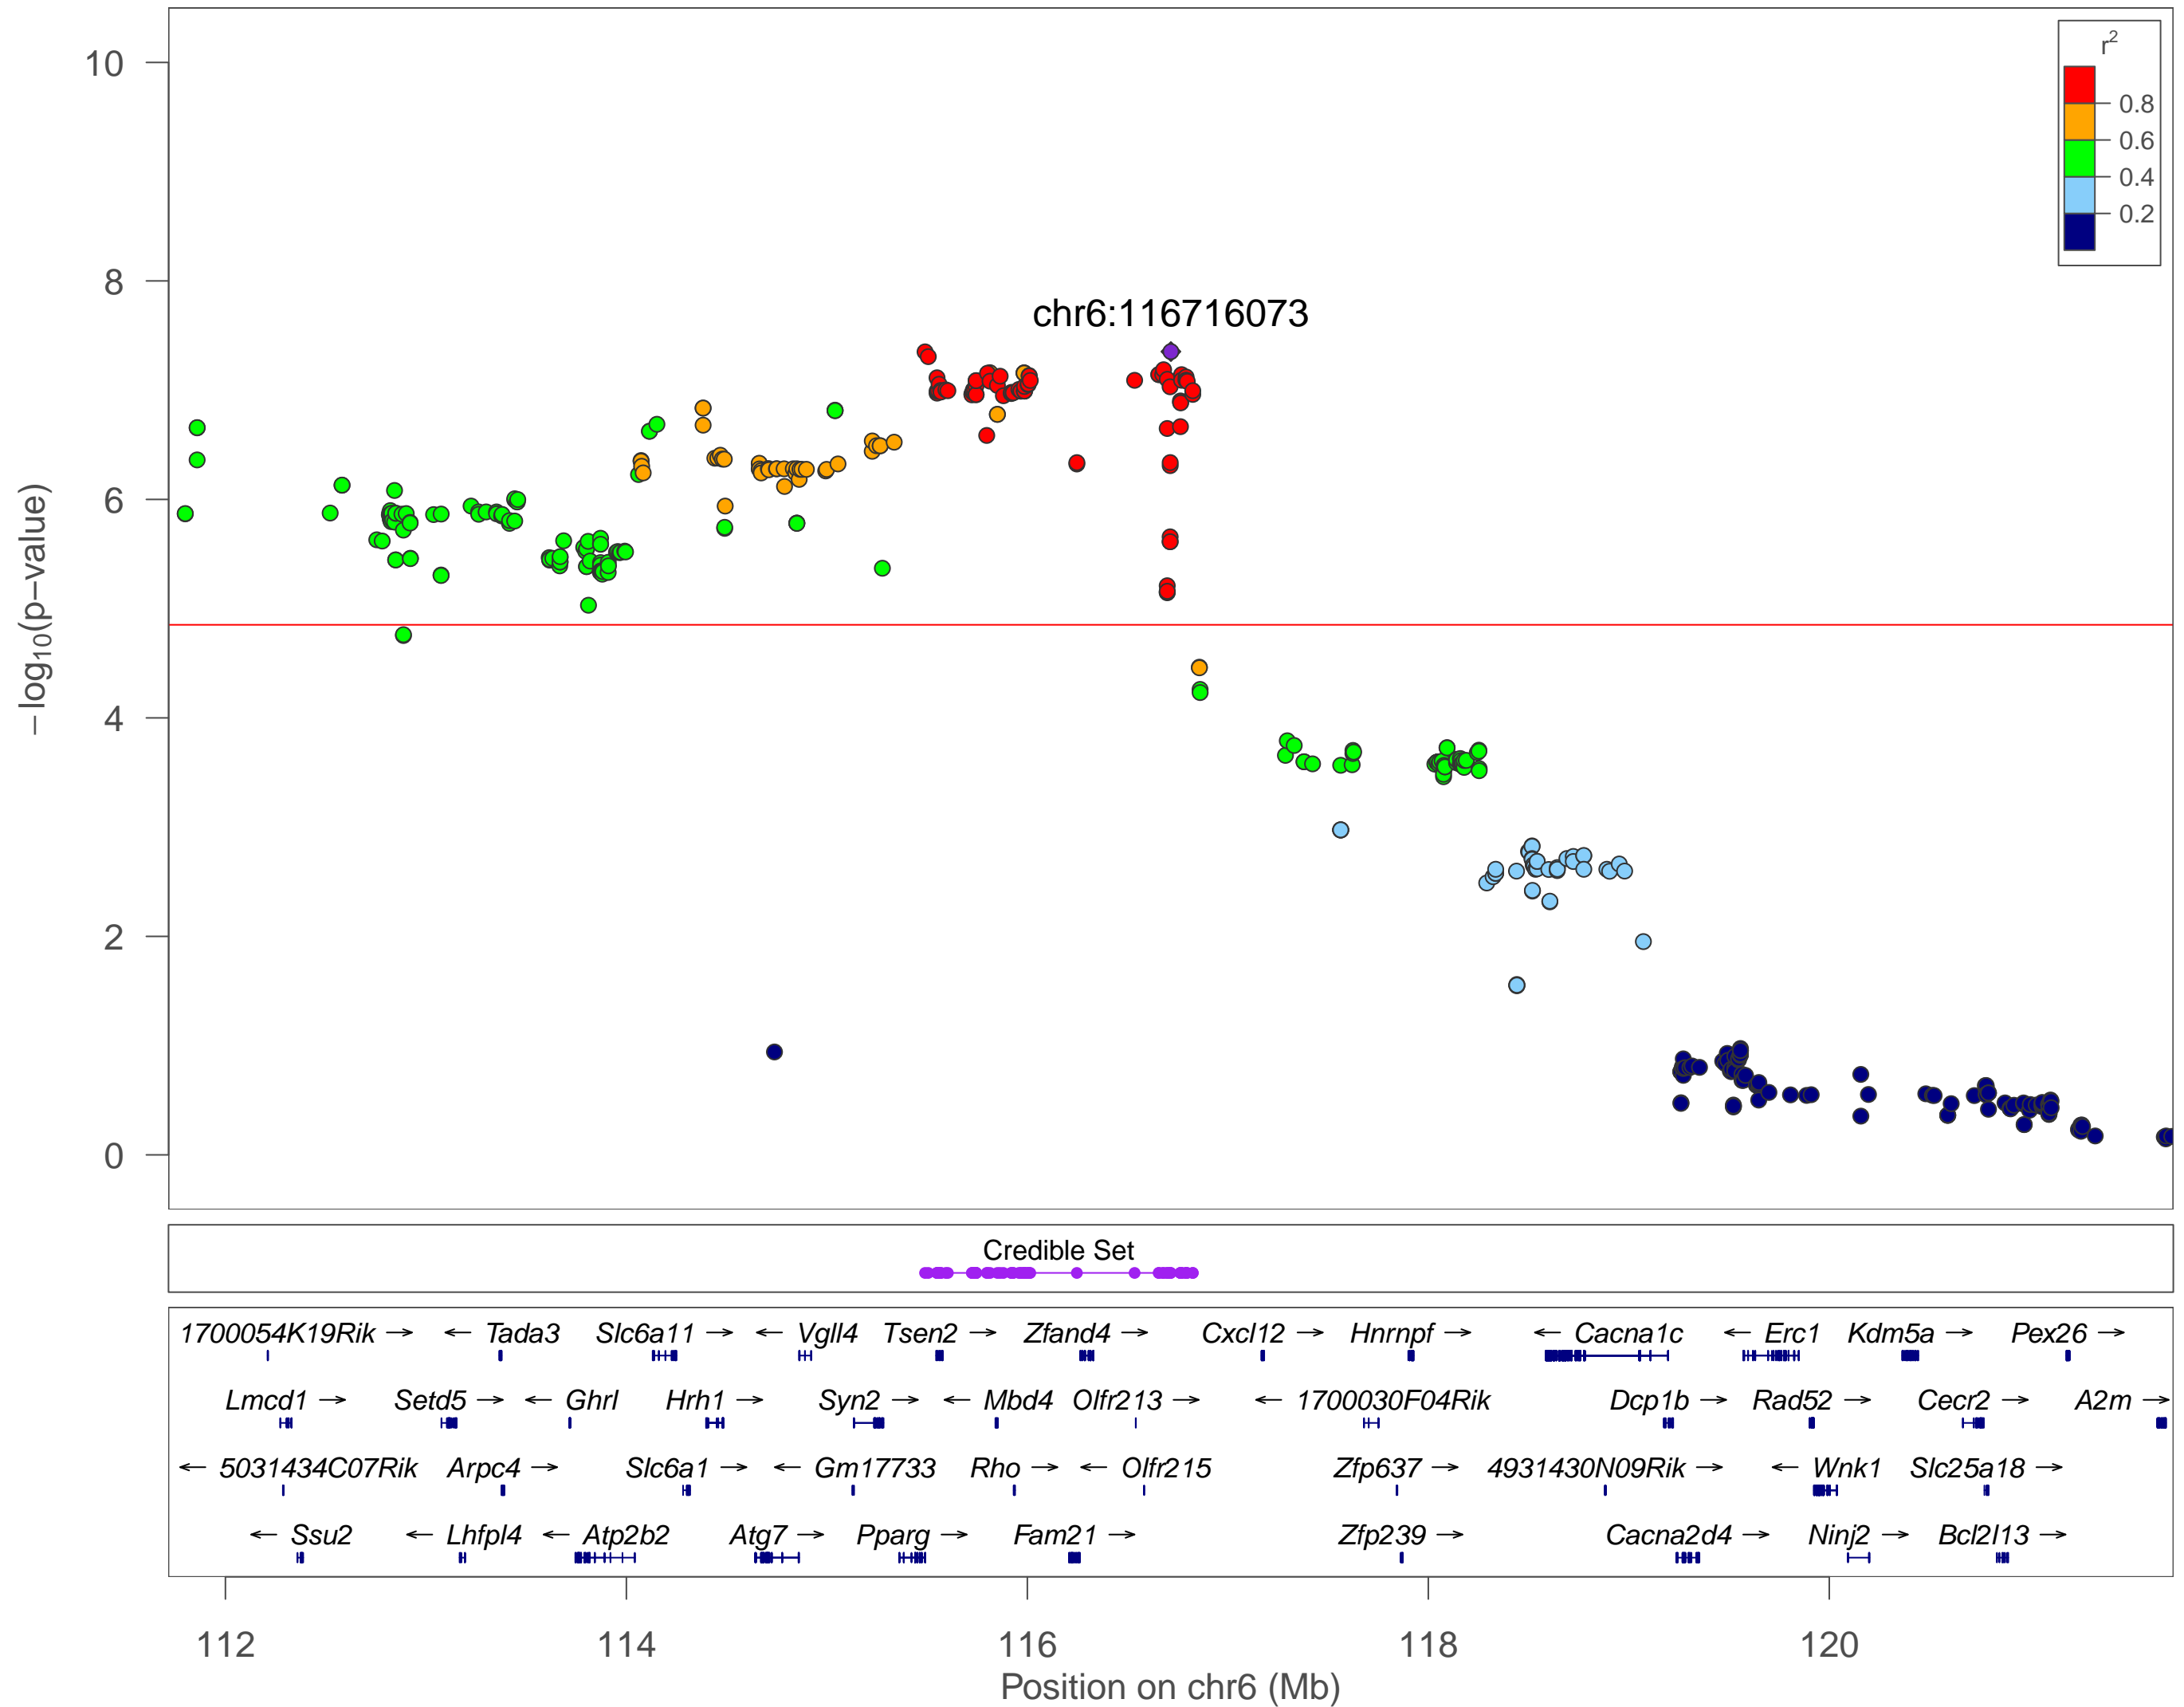

date: Thu Oct 25 17:18:29 2018  
build: F34GBS  
display range: chr6:111716073–121716073 [111716073–121716073]  
hilite range: 0 – 0 [ 0 – 0 ]  
reference SNP: chr6:116716073  
number of SNPs plotted: 445  
min P-value: 4.43E–8 [chr6:116716073]  
max P-value: 7.14E–1 [chr6:121678889]  
omitted Genes: Cav3, Oxtr, Rad18  
omitted Genes: Srgap3, Thumpd3, Gt(ROSA)26Sor  
omitted Genes: Mtmr14, Cpne9, Brpf1  
omitted Genes: Ogg1, Camk1, Ttl3  
omitted Genes: Rpusd3, Cidec, Jagn1  
omitted Genes: Il17re, Il17rc, Creld1  
omitted Genes: Prrt3, Emc3, Fancd2  
omitted Genes: Fancd2os, Brk1, Vhl  
omitted Genes: Irak2, Tatdn2, Mir7042  
omitted Genes: Sec13, Tamm41, Timp4  
omitted Genes: Mkrn2os, Mkrn2, Raf1  
omitted Genes: Tmem40, Cand2, Mir7660  
omitted Genes: Rpl32, Snora7a, Efcab12  
omitted Genes: Ift122, H1foo, Plxnd1  
omitted Genes: Tmcc1, 9530062K07Rik, March8  
omitted Genes: Alox5, Olfr211, Olfr212  
omitted Genes: Olfr214, Zfp422, Rassf4  
omitted Genes: Mir7043, 8430408G22Rik, Tmem72  
omitted Genes: Fxyd4, Rasgef1a, Mir7044  
omitted Genes: Csgalnact2, Ret, 1700069P05Rik  
omitted Genes: Gm30498, Bms1, Zfp248  
omitted Genes: Zfp9, Ankrd26, Lrtm2  
omitted Genes: Adipor2, Wnt5b, Fbxl14  
omitted Genes: 3110021A11Rik, Mir706, B4galnt3  
omitted Genes: Ccdc77, Il17ra, Cecr6  
omitted Genes: Cecr5, 1700072O05Rik, Atp6v1e1  
omitted Genes: Bid, Mical3, Tuba8  
omitted Genes: Usp18, Slc6a13, Slc6a12  
omitted Genes: Iqsec3

## Fine-mapping Regions

| snp            | chr | pos (Mb) | pp          | group        | color  |
|----------------|-----|----------|-------------|--------------|--------|
| chr6:115489819 | 6   | 115.4898 | 0.029911876 | Credible Set | purple |
| chr6:115505788 | 6   | 115.5058 | 0.027122258 | Credible Set | purple |
| chr6:115549490 | 6   | 115.5495 | 0.017619729 | Credible Set | purple |
| chr6:115549730 | 6   | 115.5497 | 0.012877132 | Credible Set | purple |
| chr6:115549829 | 6   | 115.5498 | 0.013403440 | Credible Set | purple |
| chr6:115555634 | 6   | 115.5556 | 0.013556316 | Credible Set | purple |
| chr6:115559836 | 6   | 115.5598 | 0.015448422 | Credible Set | purple |
| chr6:115567453 | 6   | 115.5675 | 0.013576450 | Credible Set | purple |
| chr6:115569261 | 6   | 115.5693 | 0.013183497 | Credible Set | purple |
| chr6:115593481 | 6   | 115.5935 | 0.013760669 | Credible Set | purple |
| chr6:115603445 | 6   | 115.6034 | 0.013530179 | Credible Set | purple |
| chr6:115723557 | 6   | 115.7236 | 0.012711679 | Credible Set | purple |
| chr6:115723602 | 6   | 115.7236 | 0.012434817 | Credible Set | purple |
| chr6:115729470 | 6   | 115.7295 | 0.013075719 | Credible Set | purple |
| chr6:115729519 | 6   | 115.7295 | 0.013184296 | Credible Set | purple |
| chr6:115730587 | 6   | 115.7306 | 0.013741989 | Credible Set | purple |
| chr6:115736586 | 6   | 115.7366 | 0.014052210 | Credible Set | purple |
| chr6:115743744 | 6   | 115.7437 | 0.014894984 | Credible Set | purple |
| chr6:115744308 | 6   | 115.7443 | 0.012471193 | Credible Set | purple |
| chr6:115744336 | 6   | 115.7443 | 0.012511485 | Credible Set | purple |
| chr6:115744487 | 6   | 115.7445 | 0.016616915 | Credible Set | purple |
| chr6:115744493 | 6   | 115.7445 | 0.016616915 | Credible Set | purple |
| chr6:115797352 | 6   | 115.7974 | 0.005438448 | Credible Set | purple |
| chr6:115801564 | 6   | 115.8016 | 0.019346817 | Credible Set | purple |
| chr6:115813904 | 6   | 115.8139 | 0.016444940 | Credible Set | purple |
| chr6:115850586 | 6   | 115.8506 | 0.015064290 | Credible Set | purple |
| chr6:115864297 | 6   | 115.8643 | 0.018189298 | Credible Set | purple |
| chr6:115880648 | 6   | 115.8806 | 0.012217102 | Credible Set | purple |
| chr6:115919848 | 6   | 115.9198 | 0.012772538 | Credible Set | purple |
| chr6:115920287 | 6   | 115.9203 | 0.013075212 | Credible Set | purple |
| chr6:115928586 | 6   | 115.9286 | 0.013054236 | Credible Set | purple |
| chr6:115929540 | 6   | 115.9295 | 0.012981674 | Credible Set | purple |
| chr6:115957904 | 6   | 115.9579 | 0.013880932 | Credible Set | purple |
| chr6:115967362 | 6   | 115.9674 | 0.013395694 | Credible Set | purple |
| chr6:115967880 | 6   | 115.9679 | 0.013446363 | Credible Set | purple |
| chr6:115985523 | 6   | 115.9855 | 0.013433663 | Credible Set | purple |

## Fine-mapping Regions

| snp            | chr | pos (Mb) | pp          | group        | color  |
|----------------|-----|----------|-------------|--------------|--------|
| chr6:115985527 | 6   | 115.9855 | 0.013433663 | Credible Set | purple |
| chr6:115985543 | 6   | 115.9855 | 0.013433663 | Credible Set | purple |
| chr6:115985717 | 6   | 115.9857 | 0.014755059 | Credible Set | purple |
| chr6:116003809 | 6   | 116.0038 | 0.015313769 | Credible Set | purple |
| chr6:116004432 | 6   | 116.0044 | 0.015529522 | Credible Set | purple |
| chr6:116009041 | 6   | 116.0090 | 0.018413782 | Credible Set | purple |
| chr6:116009081 | 6   | 116.0091 | 0.018293016 | Credible Set | purple |
| chr6:116014484 | 6   | 116.0145 | 0.016682609 | Credible Set | purple |
| chr6:116246991 | 6   | 116.2470 | 0.003127944 | Credible Set | purple |
| chr6:116535049 | 6   | 116.5350 | 0.016733290 | Credible Set | purple |
| chr6:116655672 | 6   | 116.6557 | 0.018804842 | Credible Set | purple |
| chr6:116655715 | 6   | 116.6557 | 0.018804842 | Credible Set | purple |
| chr6:116675286 | 6   | 116.6753 | 0.018754154 | Credible Set | purple |
| chr6:116679618 | 6   | 116.6796 | 0.020765511 | Credible Set | purple |
| chr6:116697627 | 6   | 116.6976 | 0.006264746 | Credible Set | purple |
| chr6:116698225 | 6   | 116.6982 | 0.017080051 | Credible Set | purple |
| chr6:116712020 | 6   | 116.7120 | 0.014661507 | Credible Set | purple |
| chr6:116712593 | 6   | 116.7126 | 0.003130955 | Credible Set | purple |
| chr6:116716073 | 6   | 116.7161 | 0.030067886 | Credible Set | purple |
| chr6:116763618 | 6   | 116.7636 | 0.010980677 | Credible Set | purple |
| chr6:116763629 | 6   | 116.7636 | 0.006501999 | Credible Set | purple |
| chr6:116764660 | 6   | 116.7647 | 0.010655808 | Credible Set | purple |
| chr6:116764667 | 6   | 116.7647 | 0.010565951 | Credible Set | purple |
| chr6:116769198 | 6   | 116.7692 | 0.018775783 | Credible Set | purple |
| chr6:116769221 | 6   | 116.7692 | 0.016754096 | Credible Set | purple |
| chr6:116791717 | 6   | 116.7917 | 0.017909708 | Credible Set | purple |
| chr6:116791844 | 6   | 116.7918 | 0.016713787 | Credible Set | purple |
| chr6:116791847 | 6   | 116.7918 | 0.016713787 | Credible Set | purple |
| chr6:116797564 | 6   | 116.7976 | 0.016373768 | Credible Set | purple |
| chr6:116825061 | 6   | 116.8251 | 0.012552009 | Credible Set | purple |
| chr6:116825105 | 6   | 116.8251 | 0.013529920 | Credible Set | purple |

# F34 GBS, iron content in spleen z score

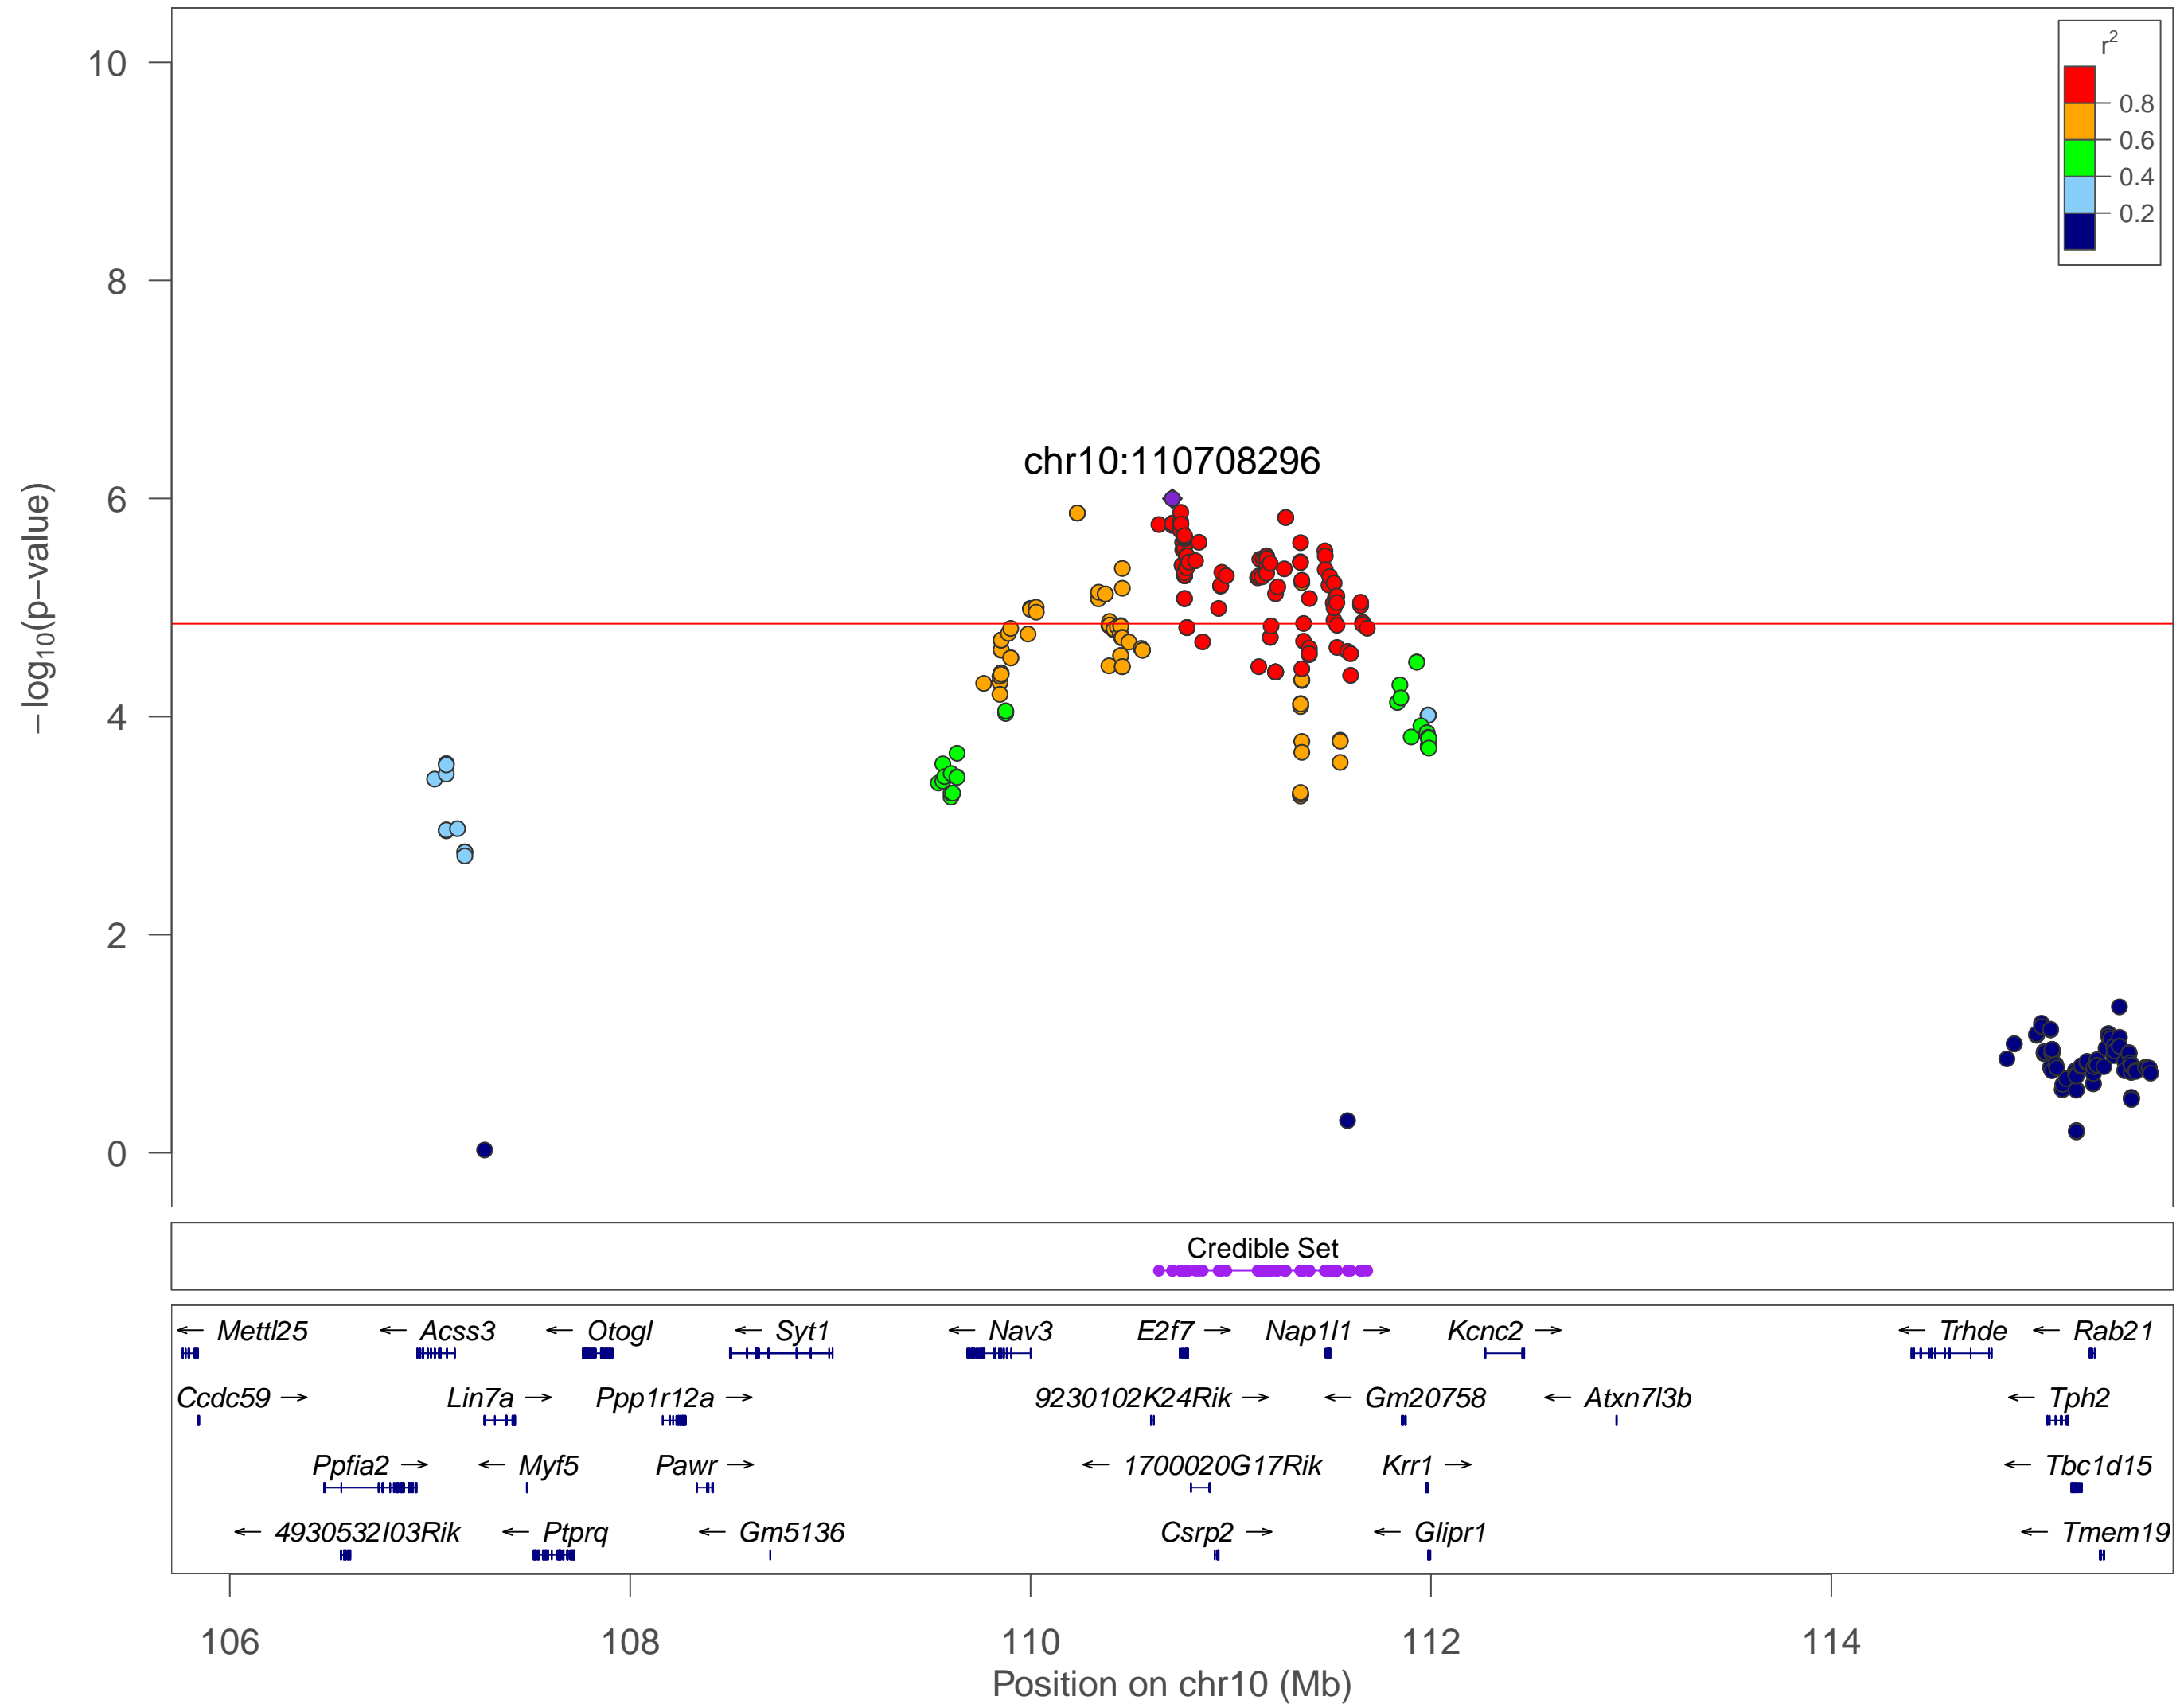

date: Thu Oct 25 17:17:39 2018

build: F34GBS

display range: chr10:105708296–115708296 [105708296–115708296]

hilite range: 0 – 0 [ 0 – 0 ]

reference SNP: chr10:110708296

number of SNPs plotted: 326

min P-value: 1E–6 [chr10:110708296]

max P-value: 9.41E–1 [chr10:107272725]

omitted Genes: Myf6, Gm29685, Zdhhc17

omitted Genes: Osbpl8, Bbs10, Gm5176

omitted Genes: Phlda1, 4933440J02Rik, Glipr1l1

omitted Genes: Glipr1l2, Caps2, 1700010J16Rik

omitted Genes: Thap2, Zfc3h1, Lgr5

omitted Genes: A930009A15Rik

## Fine-mapping Regions

| snp             | chr | pos (Mb) | pp          | group        | color  |
|-----------------|-----|----------|-------------|--------------|--------|
| chr10:110641142 | 10  | 110.6411 | 0.018986892 | Credible Set | purple |
| chr10:110708014 | 10  | 110.7080 | 0.018986892 | Credible Set | purple |
| chr10:110708268 | 10  | 110.7083 | 0.018986892 | Credible Set | purple |
| chr10:110708269 | 10  | 110.7083 | 0.018986892 | Credible Set | purple |
| chr10:110708296 | 10  | 110.7083 | 0.036976812 | Credible Set | purple |
| chr10:110708628 | 10  | 110.7086 | 0.018986892 | Credible Set | purple |
| chr10:110749349 | 10  | 110.7493 | 0.018986892 | Credible Set | purple |
| chr10:110749883 | 10  | 110.7499 | 0.018986892 | Credible Set | purple |
| chr10:110749995 | 10  | 110.7500 | 0.018986892 | Credible Set | purple |
| chr10:110750029 | 10  | 110.7500 | 0.036976812 | Credible Set | purple |
| chr10:110750810 | 10  | 110.7508 | 0.018986892 | Credible Set | purple |
| chr10:110756900 | 10  | 110.7569 | 0.009763502 | Credible Set | purple |
| chr10:110757011 | 10  | 110.7570 | 0.009763502 | Credible Set | purple |
| chr10:110759826 | 10  | 110.7598 | 0.012864948 | Credible Set | purple |
| chr10:110760381 | 10  | 110.7604 | 0.012864948 | Credible Set | purple |
| chr10:110768547 | 10  | 110.7685 | 0.012864948 | Credible Set | purple |
| chr10:110768747 | 10  | 110.7687 | 0.005028699 | Credible Set | purple |
| chr10:110768762 | 10  | 110.7688 | 0.005028699 | Credible Set | purple |
| chr10:110768830 | 10  | 110.7688 | 0.018986892 | Credible Set | purple |
| chr10:110768858 | 10  | 110.7689 | 0.018986892 | Credible Set | purple |
| chr10:110768862 | 10  | 110.7689 | 0.018986892 | Credible Set | purple |
| chr10:110768863 | 10  | 110.7689 | 0.018986892 | Credible Set | purple |
| chr10:110768865 | 10  | 110.7689 | 0.018986892 | Credible Set | purple |
| chr10:110769342 | 10  | 110.7693 | 0.007884281 | Credible Set | purple |
| chr10:110769400 | 10  | 110.7694 | 0.007884281 | Credible Set | purple |
| chr10:110769437 | 10  | 110.7694 | 0.007884281 | Credible Set | purple |
| chr10:110769467 | 10  | 110.7695 | 0.007884281 | Credible Set | purple |
| chr10:110769523 | 10  | 110.7695 | 0.007884281 | Credible Set | purple |
| chr10:110769585 | 10  | 110.7696 | 0.007884281 | Credible Set | purple |
| chr10:110778078 | 10  | 110.7781 | 0.012864948 | Credible Set | purple |
| chr10:110778106 | 10  | 110.7781 | 0.012864948 | Credible Set | purple |
| chr10:110778366 | 10  | 110.7784 | 0.009763502 | Credible Set | purple |
| chr10:110780233 | 10  | 110.7802 | 0.009763502 | Credible Set | purple |
| chr10:110781079 | 10  | 110.7811 | 0.002759361 | Credible Set | purple |
| chr10:110781085 | 10  | 110.7811 | 0.002759361 | Credible Set | purple |
| chr10:110781088 | 10  | 110.7811 | 0.002759361 | Credible Set | purple |



## Fine-mapping Regions

| snp             | chr | pos (Mb) | pp          | group        | color  |
|-----------------|-----|----------|-------------|--------------|--------|
| chr10:110782063 | 10  | 110.7821 | 0.012864948 | Credible Set | purple |
| chr10:110790601 | 10  | 110.7906 | 0.009763502 | Credible Set | purple |
| chr10:110824052 | 10  | 110.8241 | 0.009763502 | Credible Set | purple |
| chr10:110841372 | 10  | 110.8414 | 0.012864948 | Credible Set | purple |
| chr10:110859622 | 10  | 110.8596 | 0.002002545 | Credible Set | purple |
| chr10:110939251 | 10  | 110.9393 | 0.004063067 | Credible Set | purple |
| chr10:110949219 | 10  | 110.9492 | 0.006621538 | Credible Set | purple |
| chr10:110949220 | 10  | 110.9492 | 0.006621538 | Credible Set | purple |
| chr10:110949581 | 10  | 110.9496 | 0.006621538 | Credible Set | purple |
| chr10:110955372 | 10  | 110.9554 | 0.007884281 | Credible Set | purple |
| chr10:110977680 | 10  | 110.9777 | 0.007884281 | Credible Set | purple |
| chr10:111134114 | 10  | 111.1341 | 0.007884281 | Credible Set | purple |
| chr10:111139942 | 10  | 111.1399 | 0.007884281 | Credible Set | purple |
| chr10:111139969 | 10  | 111.1400 | 0.007884281 | Credible Set | purple |
| chr10:111145119 | 10  | 111.1451 | 0.009763502 | Credible Set | purple |
| chr10:111156216 | 10  | 111.1562 | 0.007884281 | Credible Set | purple |
| chr10:111162654 | 10  | 111.1627 | 0.009763502 | Credible Set | purple |
| chr10:111178371 | 10  | 111.1784 | 0.012864948 | Credible Set | purple |
| chr10:111178404 | 10  | 111.1784 | 0.012864948 | Credible Set | purple |
| chr10:111179231 | 10  | 111.1792 | 0.009763502 | Credible Set | purple |
| chr10:111179272 | 10  | 111.1793 | 0.007884281 | Credible Set | purple |
| chr10:111180485 | 10  | 111.1805 | 0.009763502 | Credible Set | purple |
| chr10:111180489 | 10  | 111.1805 | 0.009763502 | Credible Set | purple |
| chr10:111196665 | 10  | 111.1967 | 0.009763502 | Credible Set | purple |
| chr10:111196850 | 10  | 111.1968 | 0.002202789 | Credible Set | purple |
| chr10:111196872 | 10  | 111.1969 | 0.002202789 | Credible Set | purple |
| chr10:111201273 | 10  | 111.2013 | 0.002759361 | Credible Set | purple |
| chr10:111223748 | 10  | 111.2237 | 0.005713580 | Credible Set | purple |
| chr10:111234804 | 10  | 111.2348 | 0.006621538 | Credible Set | purple |
| chr10:111267516 | 10  | 111.2675 | 0.009763502 | Credible Set | purple |
| chr10:111274460 | 10  | 111.2745 | 0.036976812 | Credible Set | purple |
| chr10:111274480 | 10  | 111.2745 | 0.036976812 | Credible Set | purple |
| chr10:111347458 | 10  | 111.3475 | 0.009763502 | Credible Set | purple |
| chr10:111348661 | 10  | 111.3487 | 0.009763502 | Credible Set | purple |
| chr10:111348802 | 10  | 111.3488 | 0.012864948 | Credible Set | purple |
| chr10:111354708 | 10  | 111.3547 | 0.006621538 | Credible Set | purple |

## Fine-mapping Regions

| snp             | chr | pos (Mb) | pp          | group        | color  |
|-----------------|-----|----------|-------------|--------------|--------|
| chr10:111363662 | 10  | 111.3637 | 0.002947014 | Credible Set | purple |
| chr10:111363665 | 10  | 111.3637 | 0.002097769 | Credible Set | purple |
| chr10:111391890 | 10  | 111.3919 | 0.001696378 | Credible Set | purple |
| chr10:111391901 | 10  | 111.3919 | 0.001576646 | Credible Set | purple |
| chr10:111391954 | 10  | 111.3920 | 0.001763555 | Credible Set | purple |
| chr10:111391955 | 10  | 111.3920 | 0.001634260 | Credible Set | purple |
| chr10:111392557 | 10  | 111.3926 | 0.005028699 | Credible Set | purple |
| chr10:111470144 | 10  | 111.4701 | 0.012864948 | Credible Set | purple |
| chr10:111471816 | 10  | 111.4718 | 0.012864948 | Credible Set | purple |
| chr10:111471933 | 10  | 111.4719 | 0.009763502 | Credible Set | purple |
| chr10:111490761 | 10  | 111.4908 | 0.006621538 | Credible Set | purple |
| chr10:111494112 | 10  | 111.4941 | 0.007884281 | Credible Set | purple |
| chr10:111512151 | 10  | 111.5122 | 0.004493315 | Credible Set | purple |
| chr10:111515685 | 10  | 111.5157 | 0.003162889 | Credible Set | purple |
| chr10:111516056 | 10  | 111.5161 | 0.004063067 | Credible Set | purple |
| chr10:111516061 | 10  | 111.5161 | 0.006621538 | Credible Set | purple |
| chr10:111522846 | 10  | 111.5228 | 0.005028699 | Credible Set | purple |
| chr10:111529740 | 10  | 111.5297 | 0.005028699 | Credible Set | purple |
| chr10:111529759 | 10  | 111.5298 | 0.004493315 | Credible Set | purple |
| chr10:111530393 | 10  | 111.5304 | 0.002759361 | Credible Set | purple |
| chr10:111530397 | 10  | 111.5304 | 0.001836439 | Credible Set | purple |
| chr10:111583278 | 10  | 111.5833 | 0.001696378 | Credible Set | purple |
| chr10:111598785 | 10  | 111.5988 | 0.001634260 | Credible Set | purple |
| chr10:111648540 | 10  | 111.6485 | 0.004493315 | Credible Set | purple |
| chr10:111648550 | 10  | 111.6486 | 0.004063067 | Credible Set | purple |
| chr10:111648631 | 10  | 111.6486 | 0.004493315 | Credible Set | purple |
| chr10:111658438 | 10  | 111.6584 | 0.002947014 | Credible Set | purple |
| chr10:111658509 | 10  | 111.6585 | 0.002947014 | Credible Set | purple |
| chr10:111681517 | 10  | 111.6815 | 0.002759361 | Credible Set | purple |

F34 GBS, locomotor test day 1, total distance travelled in 30min (cm)

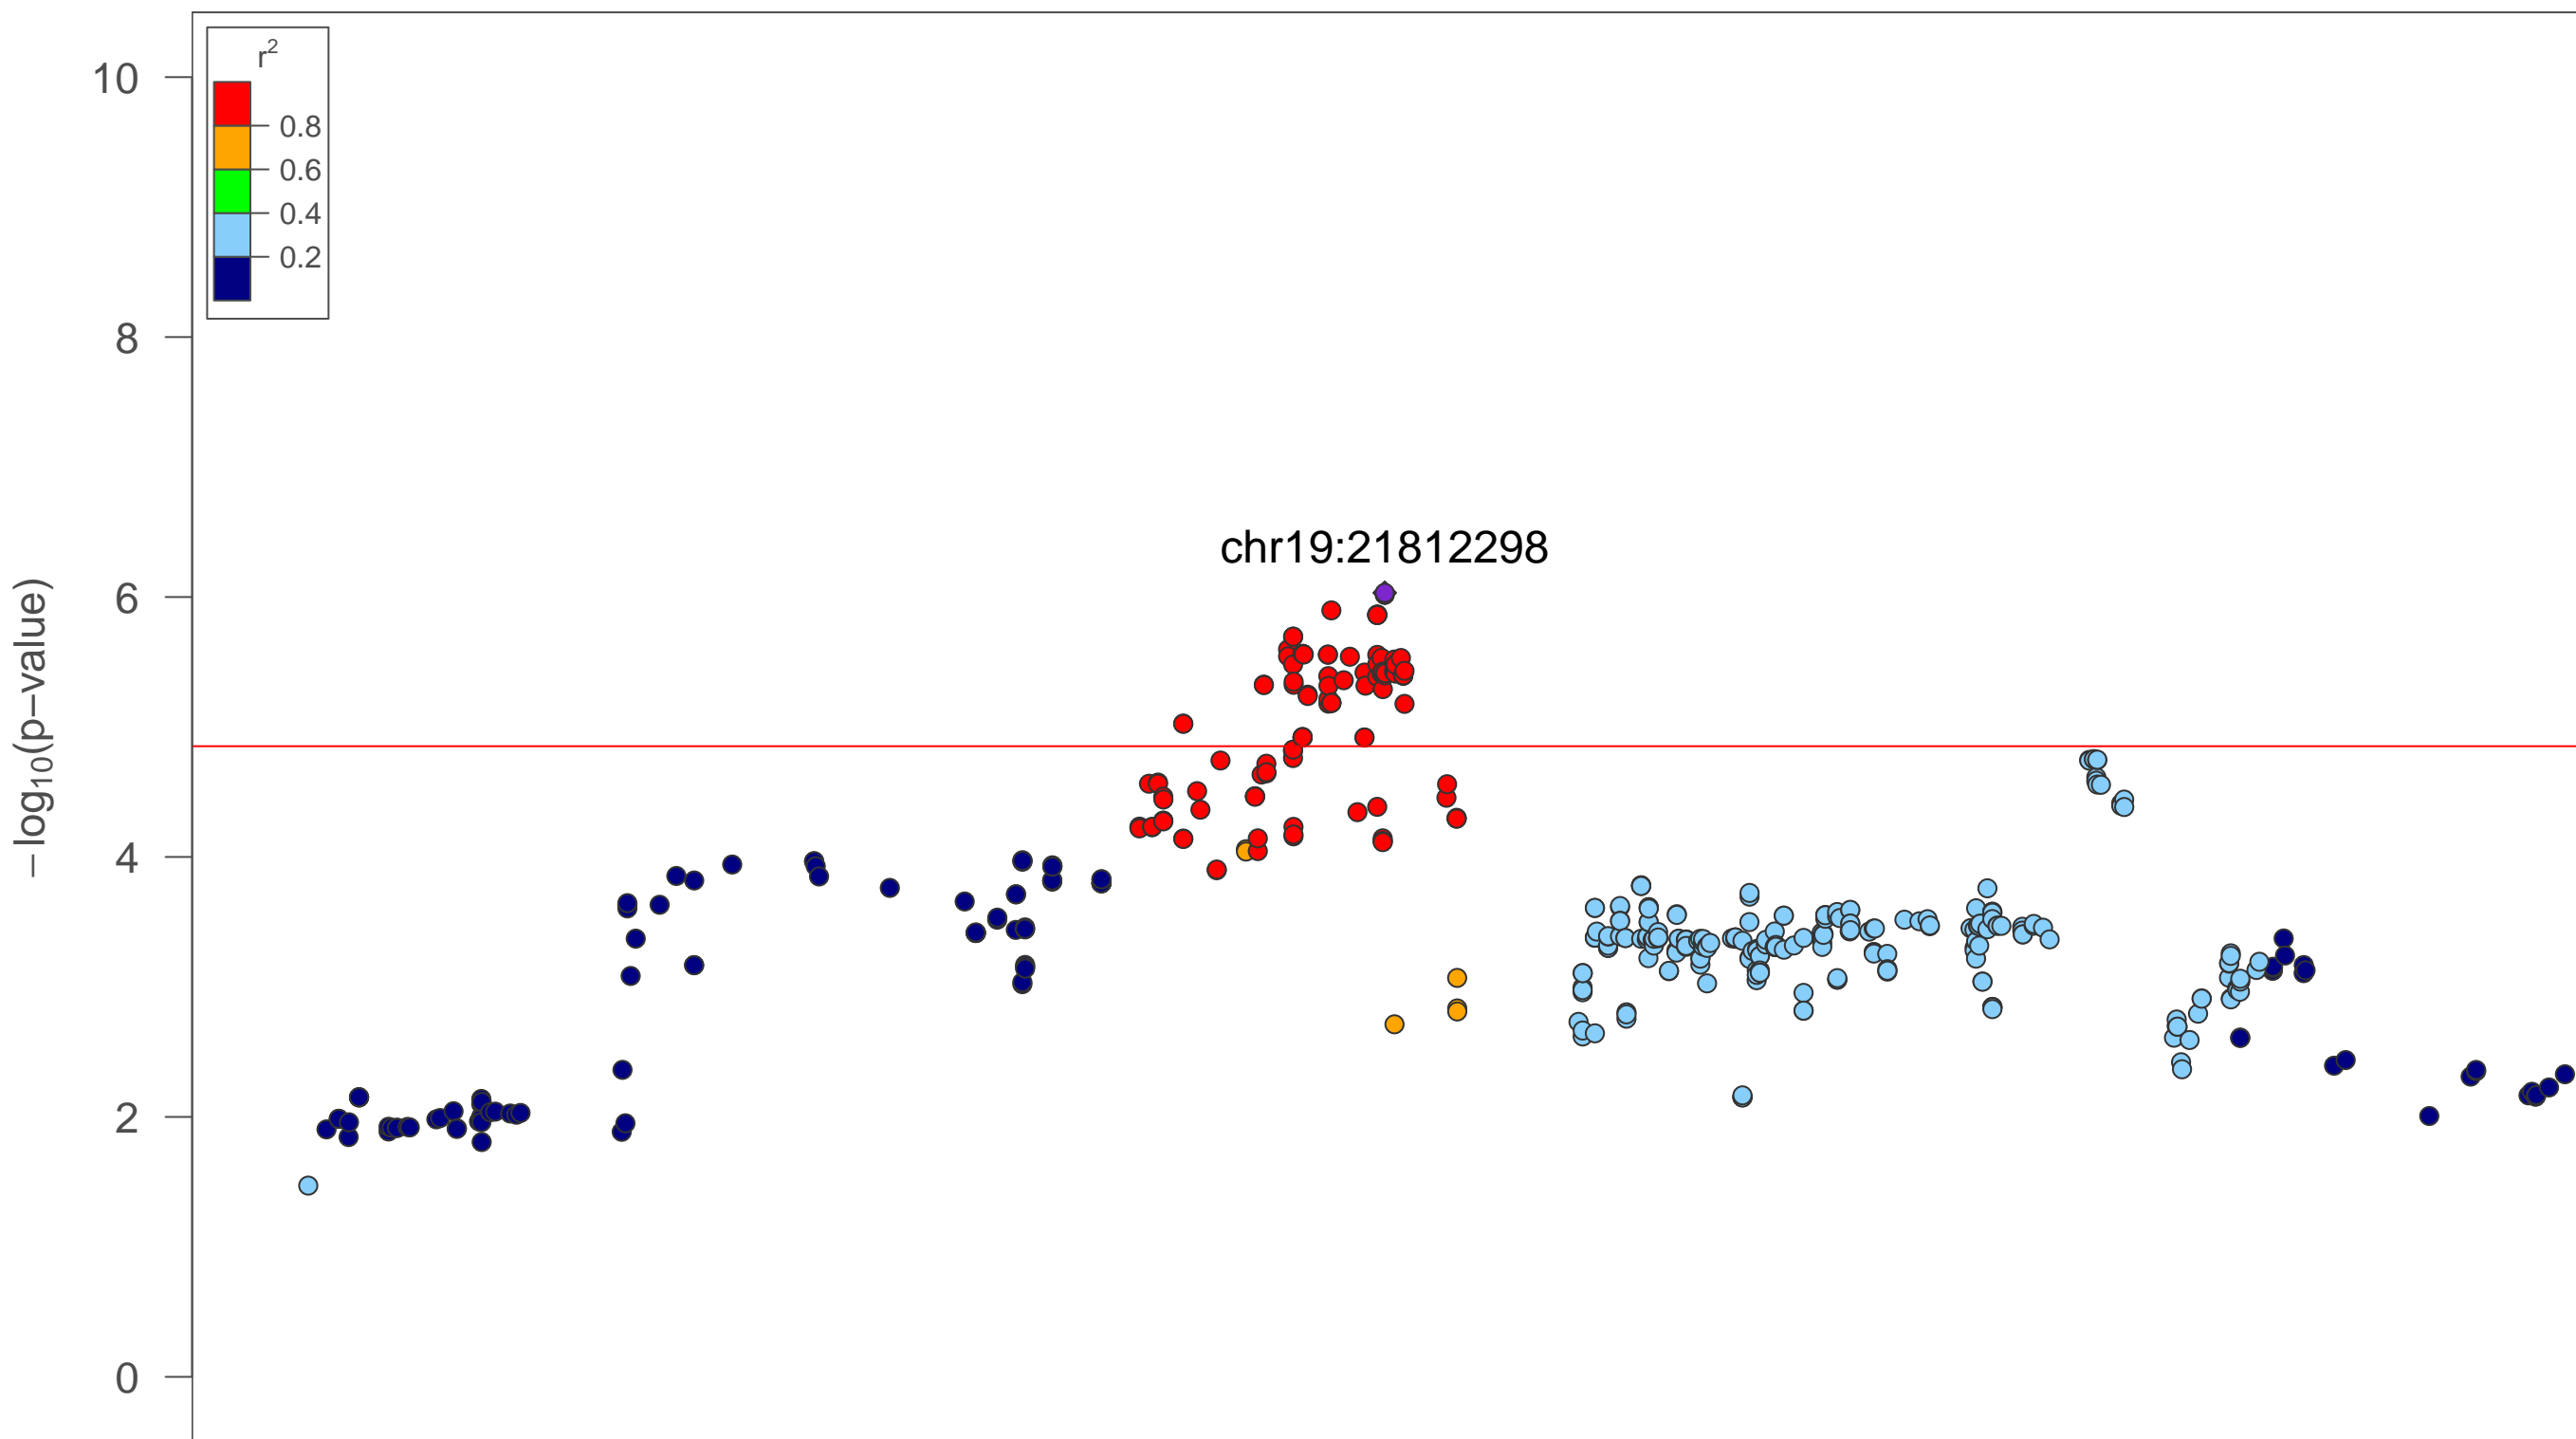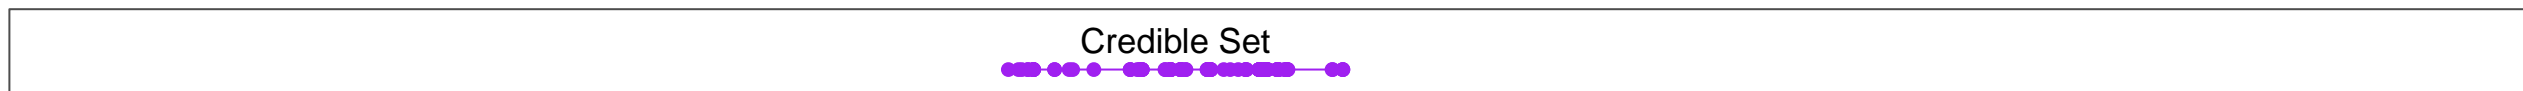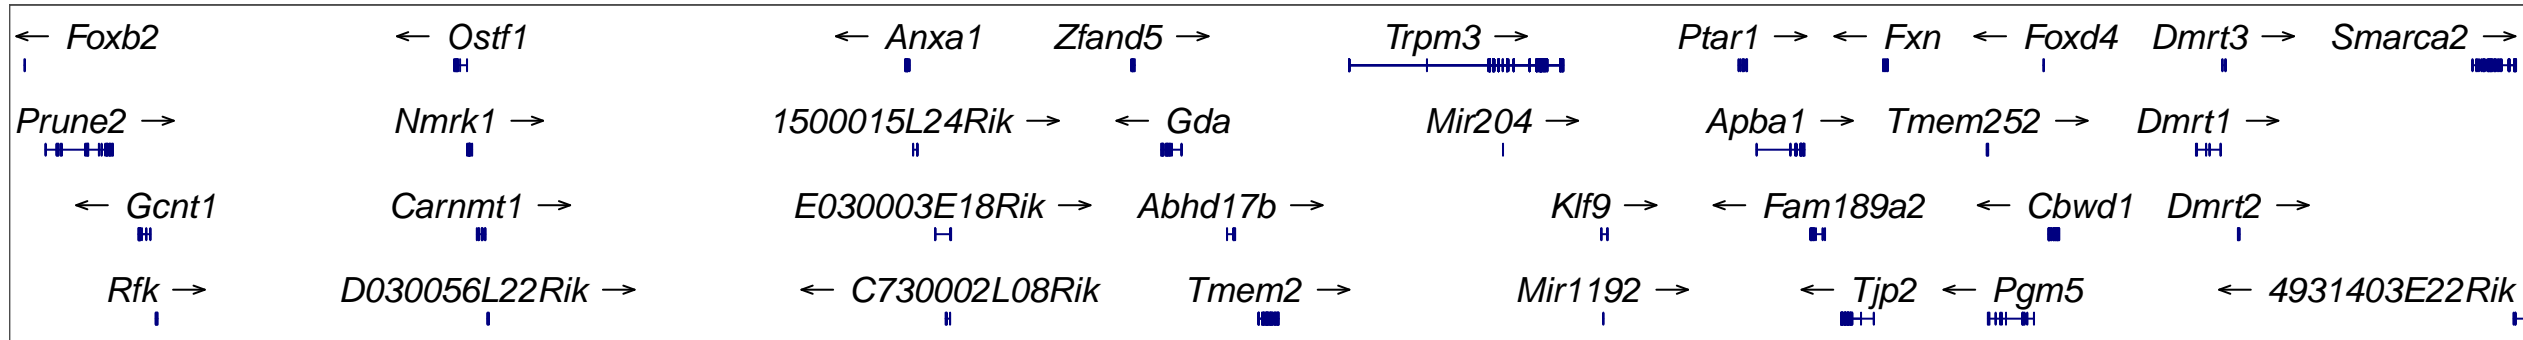

17 genes  
omitted

date: Thu Oct 25 17:18:38 2018

build: F34GBS

display range: chr19:16812298–26812298 [16812298–26812298]

hilite range: 0 – 0 [ 0 – 0 ]

reference SNP: chr19:21812298

number of SNPs plotted: 470

min P-value: 9.28E–7 [chr19:21812298]

max P-value: 3.38E–2 [chr19:17299794]

omitted Genes: Pcsk5, Trpm6, Rorb

omitted Genes: Aldh1a1, Aldh1a7, Tmc1

omitted Genes: 4930554I06Rik, 1110059E24Rik, Smc5

omitted Genes: Mamdc2, 1700028P14Rik, Pip5k1b

omitted Genes: Fam122a, Mir3084–1, Dock8

omitted Genes: Kank1, 2610016A17Rik

## Fine-mapping Regions

| snp            | chr | pos (Mb) | pp           | group        | color  |
|----------------|-----|----------|--------------|--------------|--------|
| chr19:20784050 | 19  | 20.78405 | 0.0008587211 | Credible Set | purple |
| chr19:20824062 | 19  | 20.82406 | 0.0017655107 | Credible Set | purple |
| chr19:20837342 | 19  | 20.83734 | 0.0008561549 | Credible Set | purple |
| chr19:20861811 | 19  | 20.86181 | 0.0018014019 | Credible Set | purple |
| chr19:20861821 | 19  | 20.86182 | 0.0017659141 | Credible Set | purple |
| chr19:20883962 | 19  | 20.88396 | 0.0014211894 | Credible Set | purple |
| chr19:20883975 | 19  | 20.88397 | 0.0009496508 | Credible Set | purple |
| chr19:20883979 | 19  | 20.88398 | 0.0009455779 | Credible Set | purple |
| chr19:20883980 | 19  | 20.88398 | 0.0009370136 | Credible Set | purple |
| chr19:20884530 | 19  | 20.88453 | 0.0013534603 | Credible Set | purple |
| chr19:20967742 | 19  | 20.96774 | 0.0048736412 | Credible Set | purple |
| chr19:20967772 | 19  | 20.96777 | 0.0048533035 | Credible Set | purple |
| chr19:21025668 | 19  | 21.02567 | 0.0015582333 | Credible Set | purple |
| chr19:21039744 | 19  | 21.03974 | 0.0011401914 | Credible Set | purple |
| chr19:21123769 | 19  | 21.12377 | 0.0026108852 | Credible Set | purple |
| chr19:21268525 | 19  | 21.26853 | 0.0014308116 | Credible Set | purple |
| chr19:21268527 | 19  | 21.26853 | 0.0014252921 | Credible Set | purple |
| chr19:21268550 | 19  | 21.26855 | 0.0014190158 | Credible Set | purple |
| chr19:21296098 | 19  | 21.29610 | 0.0020623460 | Credible Set | purple |
| chr19:21305518 | 19  | 21.30552 | 0.0094436402 | Credible Set | purple |
| chr19:21305568 | 19  | 21.30557 | 0.0093562265 | Credible Set | purple |
| chr19:21316234 | 19  | 21.31623 | 0.0024741063 | Credible Set | purple |
| chr19:21316268 | 19  | 21.31627 | 0.0021044591 | Credible Set | purple |
| chr19:21316305 | 19  | 21.31630 | 0.0021457242 | Credible Set | purple |
| chr19:21407108 | 19  | 21.40711 | 0.0171734453 | Credible Set | purple |
| chr19:21407182 | 19  | 21.40718 | 0.0152564050 | Credible Set | purple |
| chr19:21427800 | 19  | 21.42780 | 0.0030720723 | Credible Set | purple |
| chr19:21427805 | 19  | 21.42780 | 0.0027222168 | Credible Set | purple |
| chr19:21427851 | 19  | 21.42785 | 0.0031403069 | Credible Set | purple |
| chr19:21428151 | 19  | 21.42815 | 0.0132728482 | Credible Set | purple |
| chr19:21428338 | 19  | 21.42834 | 0.0213259592 | Credible Set | purple |
| chr19:21428343 | 19  | 21.42834 | 0.0213259592 | Credible Set | purple |
| chr19:21429788 | 19  | 21.42979 | 0.0008550118 | Credible Set | purple |
| chr19:21430361 | 19  | 21.43036 | 0.0094097845 | Credible Set | purple |
| chr19:21430412 | 19  | 21.43041 | 0.0099109711 | Credible Set | purple |
| chr19:21467882 | 19  | 21.46788 | 0.0159382825 | Credible Set | purple |

## Fine-mapping Regions

| snp            | chr | pos (Mb) | pp          | group        | color  |
|----------------|-----|----------|-------------|--------------|--------|
| chr19:21467967 | 19  | 21.46797 | 0.003887071 | Credible Set | purple |
| chr19:21467982 | 19  | 21.46798 | 0.003853277 | Credible Set | purple |
| chr19:21467985 | 19  | 21.46798 | 0.003853277 | Credible Set | purple |
| chr19:21467987 | 19  | 21.46799 | 0.003870160 | Credible Set | purple |
| chr19:21472509 | 19  | 21.47251 | 0.015775053 | Credible Set | purple |
| chr19:21472526 | 19  | 21.47253 | 0.015757697 | Credible Set | purple |
| chr19:21489550 | 19  | 21.48955 | 0.007955430 | Credible Set | purple |
| chr19:21489579 | 19  | 21.48958 | 0.007779354 | Credible Set | purple |
| chr19:21574198 | 19  | 21.57420 | 0.015685100 | Credible Set | purple |
| chr19:21574202 | 19  | 21.57420 | 0.015732871 | Credible Set | purple |
| chr19:21575782 | 19  | 21.57578 | 0.010901563 | Credible Set | purple |
| chr19:21576364 | 19  | 21.57636 | 0.006832973 | Credible Set | purple |
| chr19:21576365 | 19  | 21.57636 | 0.007386746 | Credible Set | purple |
| chr19:21576374 | 19  | 21.57637 | 0.009238239 | Credible Set | purple |
| chr19:21588462 | 19  | 21.58846 | 0.006909232 | Credible Set | purple |
| chr19:21588470 | 19  | 21.58847 | 0.006924589 | Credible Set | purple |
| chr19:21588527 | 19  | 21.58853 | 0.006942255 | Credible Set | purple |
| chr19:21588528 | 19  | 21.58853 | 0.006918987 | Credible Set | purple |
| chr19:21588608 | 19  | 21.58861 | 0.033350689 | Credible Set | purple |
| chr19:21640403 | 19  | 21.64040 | 0.010165871 | Credible Set | purple |
| chr19:21666239 | 19  | 21.66624 | 0.015151776 | Credible Set | purple |
| chr19:21697884 | 19  | 21.69788 | 0.001094068 | Credible Set | purple |
| chr19:21727318 | 19  | 21.72732 | 0.003848370 | Credible Set | purple |
| chr19:21727391 | 19  | 21.72739 | 0.003854631 | Credible Set | purple |
| chr19:21727561 | 19  | 21.72756 | 0.011584296 | Credible Set | purple |
| chr19:21731633 | 19  | 21.73163 | 0.009265556 | Credible Set | purple |
| chr19:21780788 | 19  | 21.78079 | 0.010764350 | Credible Set | purple |
| chr19:21780850 | 19  | 21.78085 | 0.001196689 | Credible Set | purple |
| chr19:21780922 | 19  | 21.78092 | 0.030986314 | Credible Set | purple |
| chr19:21780928 | 19  | 21.78093 | 0.031077481 | Credible Set | purple |
| chr19:21780934 | 19  | 21.78093 | 0.030806278 | Credible Set | purple |
| chr19:21780935 | 19  | 21.78093 | 0.030806278 | Credible Set | purple |
| chr19:21781005 | 19  | 21.78101 | 0.015642938 | Credible Set | purple |
| chr19:21781019 | 19  | 21.78102 | 0.013330150 | Credible Set | purple |
| chr19:21798450 | 19  | 21.79845 | 0.011441822 | Credible Set | purple |
| chr19:21798541 | 19  | 21.79854 | 0.014854567 | Credible Set | purple |

## Fine-mapping Regions

| snp            | chr | pos (Mb) | pp           | group        | color  |
|----------------|-----|----------|--------------|--------------|--------|
| chr19:21804356 | 19  | 21.80436 | 0.0087403512 | Credible Set | purple |
| chr19:21804420 | 19  | 21.80442 | 0.0117742911 | Credible Set | purple |
| chr19:21804582 | 19  | 21.80458 | 0.0117204809 | Credible Set | purple |
| chr19:21812258 | 19  | 21.81226 | 0.0434339587 | Credible Set | purple |
| chr19:21812298 | 19  | 21.81230 | 0.0449686000 | Credible Set | purple |
| chr19:21812594 | 19  | 21.81259 | 0.0110246233 | Credible Set | purple |
| chr19:21814790 | 19  | 21.81479 | 0.0115665461 | Credible Set | purple |
| chr19:21814806 | 19  | 21.81481 | 0.0114621002 | Credible Set | purple |
| chr19:21851795 | 19  | 21.85179 | 0.0135232085 | Credible Set | purple |
| chr19:21852236 | 19  | 21.85224 | 0.0115893310 | Credible Set | purple |
| chr19:21852273 | 19  | 21.85227 | 0.0120023002 | Credible Set | purple |
| chr19:21852296 | 19  | 21.85230 | 0.0144371770 | Credible Set | purple |
| chr19:21857059 | 19  | 21.85706 | 0.0121634027 | Credible Set | purple |
| chr19:21857128 | 19  | 21.85713 | 0.0113823313 | Credible Set | purple |
| chr19:21857704 | 19  | 21.85770 | 0.0133088652 | Credible Set | purple |
| chr19:21857707 | 19  | 21.85771 | 0.0132335871 | Credible Set | purple |
| chr19:21880097 | 19  | 21.88010 | 0.0148329875 | Credible Set | purple |
| chr19:21889764 | 19  | 21.88976 | 0.0110209332 | Credible Set | purple |
| chr19:21889768 | 19  | 21.88977 | 0.0109843231 | Credible Set | purple |
| chr19:21889777 | 19  | 21.88978 | 0.0110209332 | Credible Set | purple |
| chr19:21889831 | 19  | 21.88983 | 0.0110592602 | Credible Set | purple |
| chr19:21889832 | 19  | 21.88983 | 0.0111010108 | Credible Set | purple |
| chr19:21889838 | 19  | 21.88984 | 0.0110536282 | Credible Set | purple |
| chr19:21895163 | 19  | 21.89516 | 0.0068073283 | Credible Set | purple |
| chr19:21895174 | 19  | 21.89517 | 0.0119227998 | Credible Set | purple |
| chr19:22070939 | 19  | 22.07094 | 0.0013942169 | Credible Set | purple |
| chr19:22073618 | 19  | 22.07362 | 0.0017512896 | Credible Set | purple |
| chr19:22113626 | 19  | 22.11363 | 0.0009951584 | Credible Set | purple |
| chr19:22113628 | 19  | 22.11363 | 0.0009812304 | Credible Set | purple |
| chr19:22113687 | 19  | 22.11369 | 0.0009817933 | Credible Set | purple |

F34 GBS, locomotor test day 2, total distance travelled in 30min (cm)

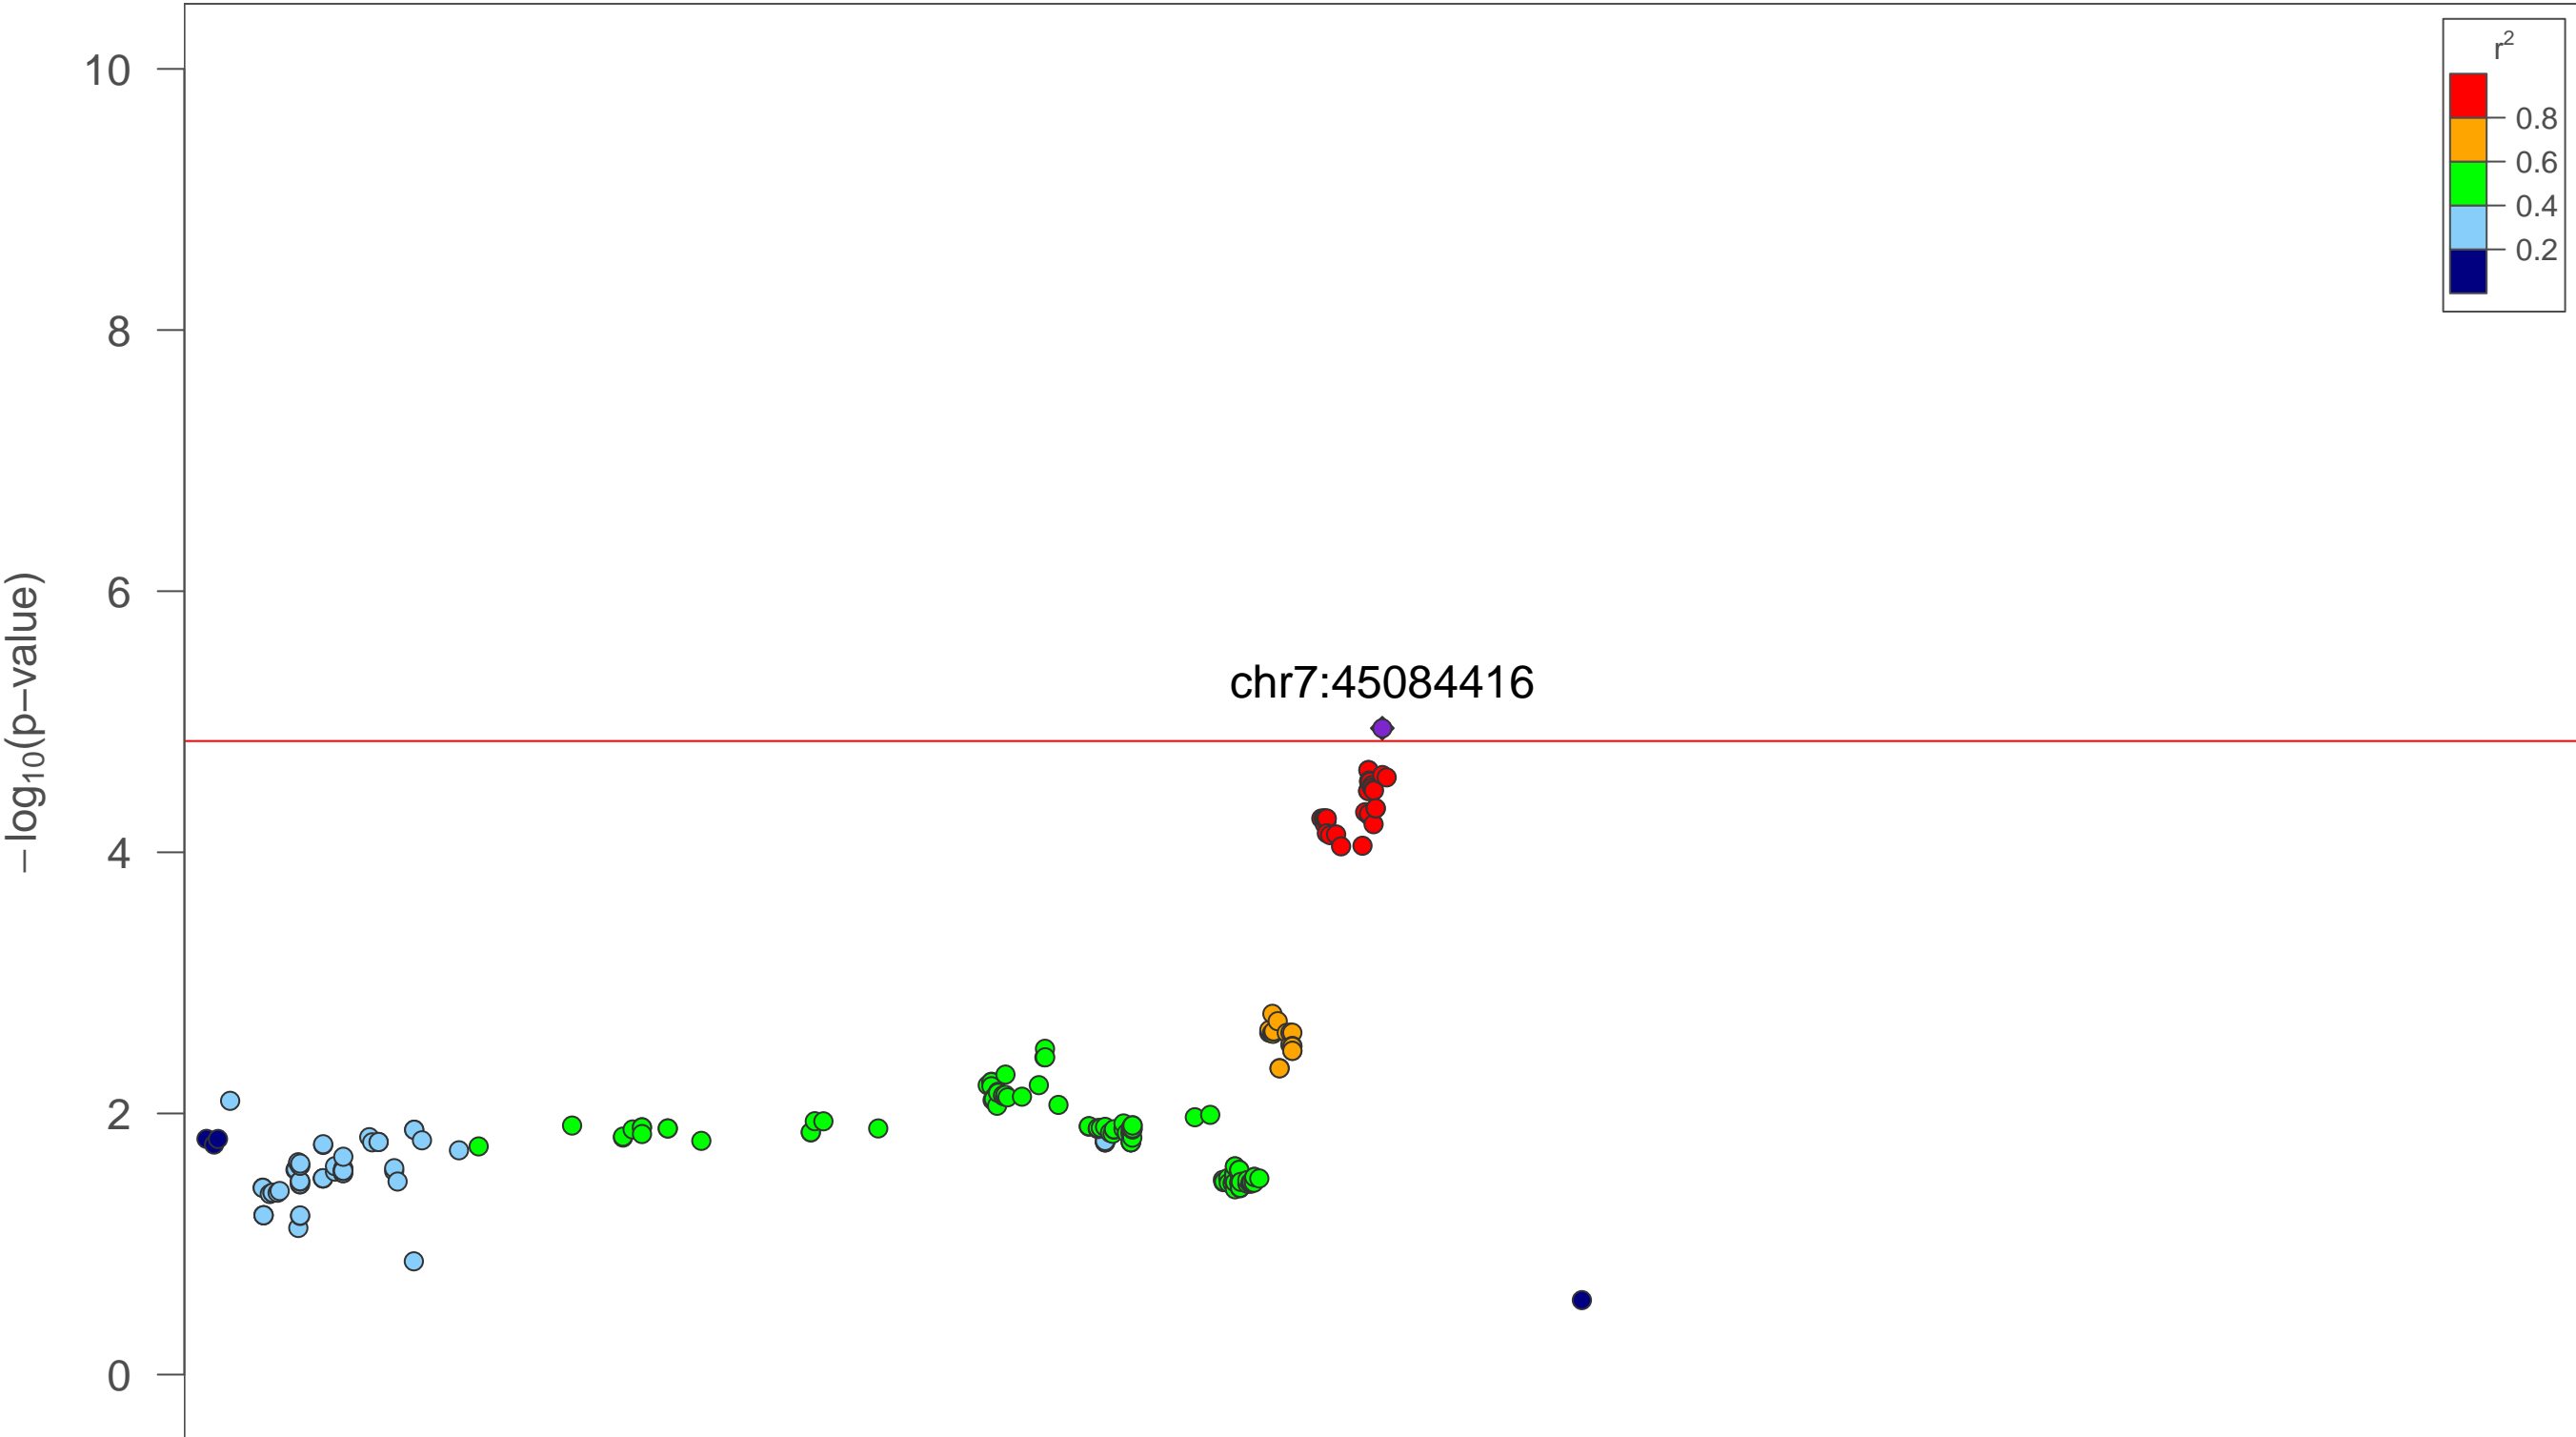

Credible Set

4933402C06Rik → ← Vmn2r58 ← Vmn2r62 ← Cd33 Klk1b3 → Il4i1 → Ntf5 → Nomo1 → ← Saa1 ← Mrgpra3 ← Mrgprb1 Nav2 →  
← A230077H06Rik ← Vmn2r59 ← Vmn2r63 Ctu1 → ← Acpt ← Atf5 Hrc → ← Emp3 ← Tph1 ← Mrgpra2a Mrgprb8 → ← Dbx1  
Vstm2b → Vmn2r60 → Gm9268 → Klk12 → Syt3 → Ifr3 → Bcat2 → Otog → Ldhc → ← Mrgpra4 ← Csrp3 Htatip2 →  
4930433I11Rik → Vmn2r61 → Zfp936 → Klk6 → Lrrc4b → ← Fcgrt Ntn5 → Munc → ← Ptpn5 ← Mrgprx1 ← E2f8 Prmt3 →

199 genes  
omitted

Position on chr7 (Mb)



date: Thu Oct 25 17:18:53 2018

build: F34GBS

display range: chr7:40084416–50084416 [40084416–50084416]

hilite range: 0 – 0 [ 0 – 0 ]

reference SNP: chr7:45084416

number of SNPs plotted: 225

min P-value: 1.12E–5 [chr7:45084416]

max P-value: 2.69E–1 [chr7:45917340]

omitted Genes: Gm4884, 1700110I07Rik, Gm5592

omitted Genes: AI987944, Vmn2r57, AW146154

omitted Genes: Zfp788, Vmn2r-ps54, Vmn2r-ps60

omitted Genes: 4933421I07Rik, Zfp141, 9830147E19Rik

omitted Genes: Gm5595, Gm2381, EU599041

omitted Genes: Zfp715, Siglecf, Siglecg

omitted Genes: Lim2, Nkg7, Cldnd2

omitted Genes: Etfb, Mir7051, Vsig10l

omitted Genes: Iglon5, 4931406B18Rik, Zfp658

omitted Genes: Zfp719, Zfp819, Ceacam18

omitted Genes: Siglece, Klk14, Klk13

omitted Genes: 2310002F09Rik, Klk11, Klk10

omitted Genes: Klk9, Klk8, Klk7

omitted Genes: Klk5, Klk4, Klk15

omitted Genes: Klk1b7-ps, Klk1b8, Klk1b1

omitted Genes: Klk1b9, Klk1b11, Klk1b26

omitted Genes: Klk1b27, Klk1b21, Klk1b22

omitted Genes: Klk1b16, Klk1b24, Klk1b4

omitted Genes: Klk1b5, Klk1, 1700028J19Rik

omitted Genes: 2410002F23Rik, Snord88c, Snord88a

omitted Genes: Clec11a, Shank1, 1700008O03Rik

omitted Genes: Aspdh, Josd2, Mir7052

omitted Genes: 5430431A17Rik, Emc10, Fam71e1

omitted Genes: Mybpc2, Spib, Pold1

omitted Genes: Mir7053, Nr1h2, Napsa

omitted Genes: Kcnc3, Myh14, Izumo2

omitted Genes: Zfp473, Vrk3, Nup62

omitted Genes: Gm21948, Tbc1d17, Akt1s1

omitted Genes: Mir707, Pnkp, Ptov1

omitted Genes: Med25, Fuz, Ap2a1

omitted Genes: Tsks, Cpt1c, Prrm1

omitted Genes: Gm15545, Rpl2l12, Scf1

Make more plots at <http://csg.sph.umich.edu/locuszoom/>

## Fine-mapping Regions

| snp           | chr | pos (Mb) | pp         | group        | color  |
|---------------|-----|----------|------------|--------------|--------|
| chr7:44829933 | 7   | 44.82993 | 0.02073332 | Credible Set | purple |
| chr7:44839966 | 7   | 44.83997 | 0.02069526 | Credible Set | purple |
| chr7:44844016 | 7   | 44.84402 | 0.02073662 | Credible Set | purple |
| chr7:44844285 | 7   | 44.84428 | 0.01890285 | Credible Set | purple |
| chr7:44844322 | 7   | 44.84432 | 0.02073662 | Credible Set | purple |
| chr7:44851630 | 7   | 44.85163 | 0.01976668 | Credible Set | purple |
| chr7:44852639 | 7   | 44.85264 | 0.02076204 | Credible Set | purple |
| chr7:44852965 | 7   | 44.85296 | 0.01619501 | Credible Set | purple |
| chr7:44866590 | 7   | 44.86659 | 0.01570153 | Credible Set | purple |
| chr7:44891663 | 7   | 44.89166 | 0.01589941 | Credible Set | purple |
| chr7:44912209 | 7   | 44.91221 | 0.01302882 | Credible Set | purple |
| chr7:45001761 | 7   | 45.00176 | 0.01316522 | Credible Set | purple |
| chr7:45012901 | 7   | 45.01290 | 0.02304829 | Credible Set | purple |
| chr7:45025410 | 7   | 45.02541 | 0.03286698 | Credible Set | purple |
| chr7:45025443 | 7   | 45.02544 | 0.03289392 | Credible Set | purple |
| chr7:45026544 | 7   | 45.02654 | 0.04672684 | Credible Set | purple |
| chr7:45026548 | 7   | 45.02655 | 0.04655413 | Credible Set | purple |
| chr7:45029371 | 7   | 45.02937 | 0.03831053 | Credible Set | purple |
| chr7:45029402 | 7   | 45.02940 | 0.02185794 | Credible Set | purple |
| chr7:45029407 | 7   | 45.02941 | 0.02234440 | Credible Set | purple |
| chr7:45029413 | 7   | 45.02941 | 0.02251314 | Credible Set | purple |
| chr7:45029777 | 7   | 45.02978 | 0.03912933 | Credible Set | purple |
| chr7:45033529 | 7   | 45.03353 | 0.03831053 | Credible Set | purple |
| chr7:45041503 | 7   | 45.04150 | 0.03493138 | Credible Set | purple |
| chr7:45041522 | 7   | 45.04152 | 0.03623031 | Credible Set | purple |
| chr7:45041933 | 7   | 45.04193 | 0.03478022 | Credible Set | purple |
| chr7:45047834 | 7   | 45.04783 | 0.03364742 | Credible Set | purple |
| chr7:45047913 | 7   | 45.04791 | 0.01884979 | Credible Set | purple |
| chr7:45049496 | 7   | 45.04950 | 0.03310522 | Credible Set | purple |
| chr7:45057062 | 7   | 45.05706 | 0.02453473 | Credible Set | purple |
| chr7:45057083 | 7   | 45.05708 | 0.02459962 | Credible Set | purple |
| chr7:45084416 | 7   | 45.08442 | 0.09421839 | Credible Set | purple |
| chr7:45084764 | 7   | 45.08476 | 0.04295456 | Credible Set | purple |
| chr7:45102598 | 7   | 45.10260 | 0.04126896 | Credible Set | purple |

F34 GBS, locomotor test day 2, total distance travelled in 30min (cm)

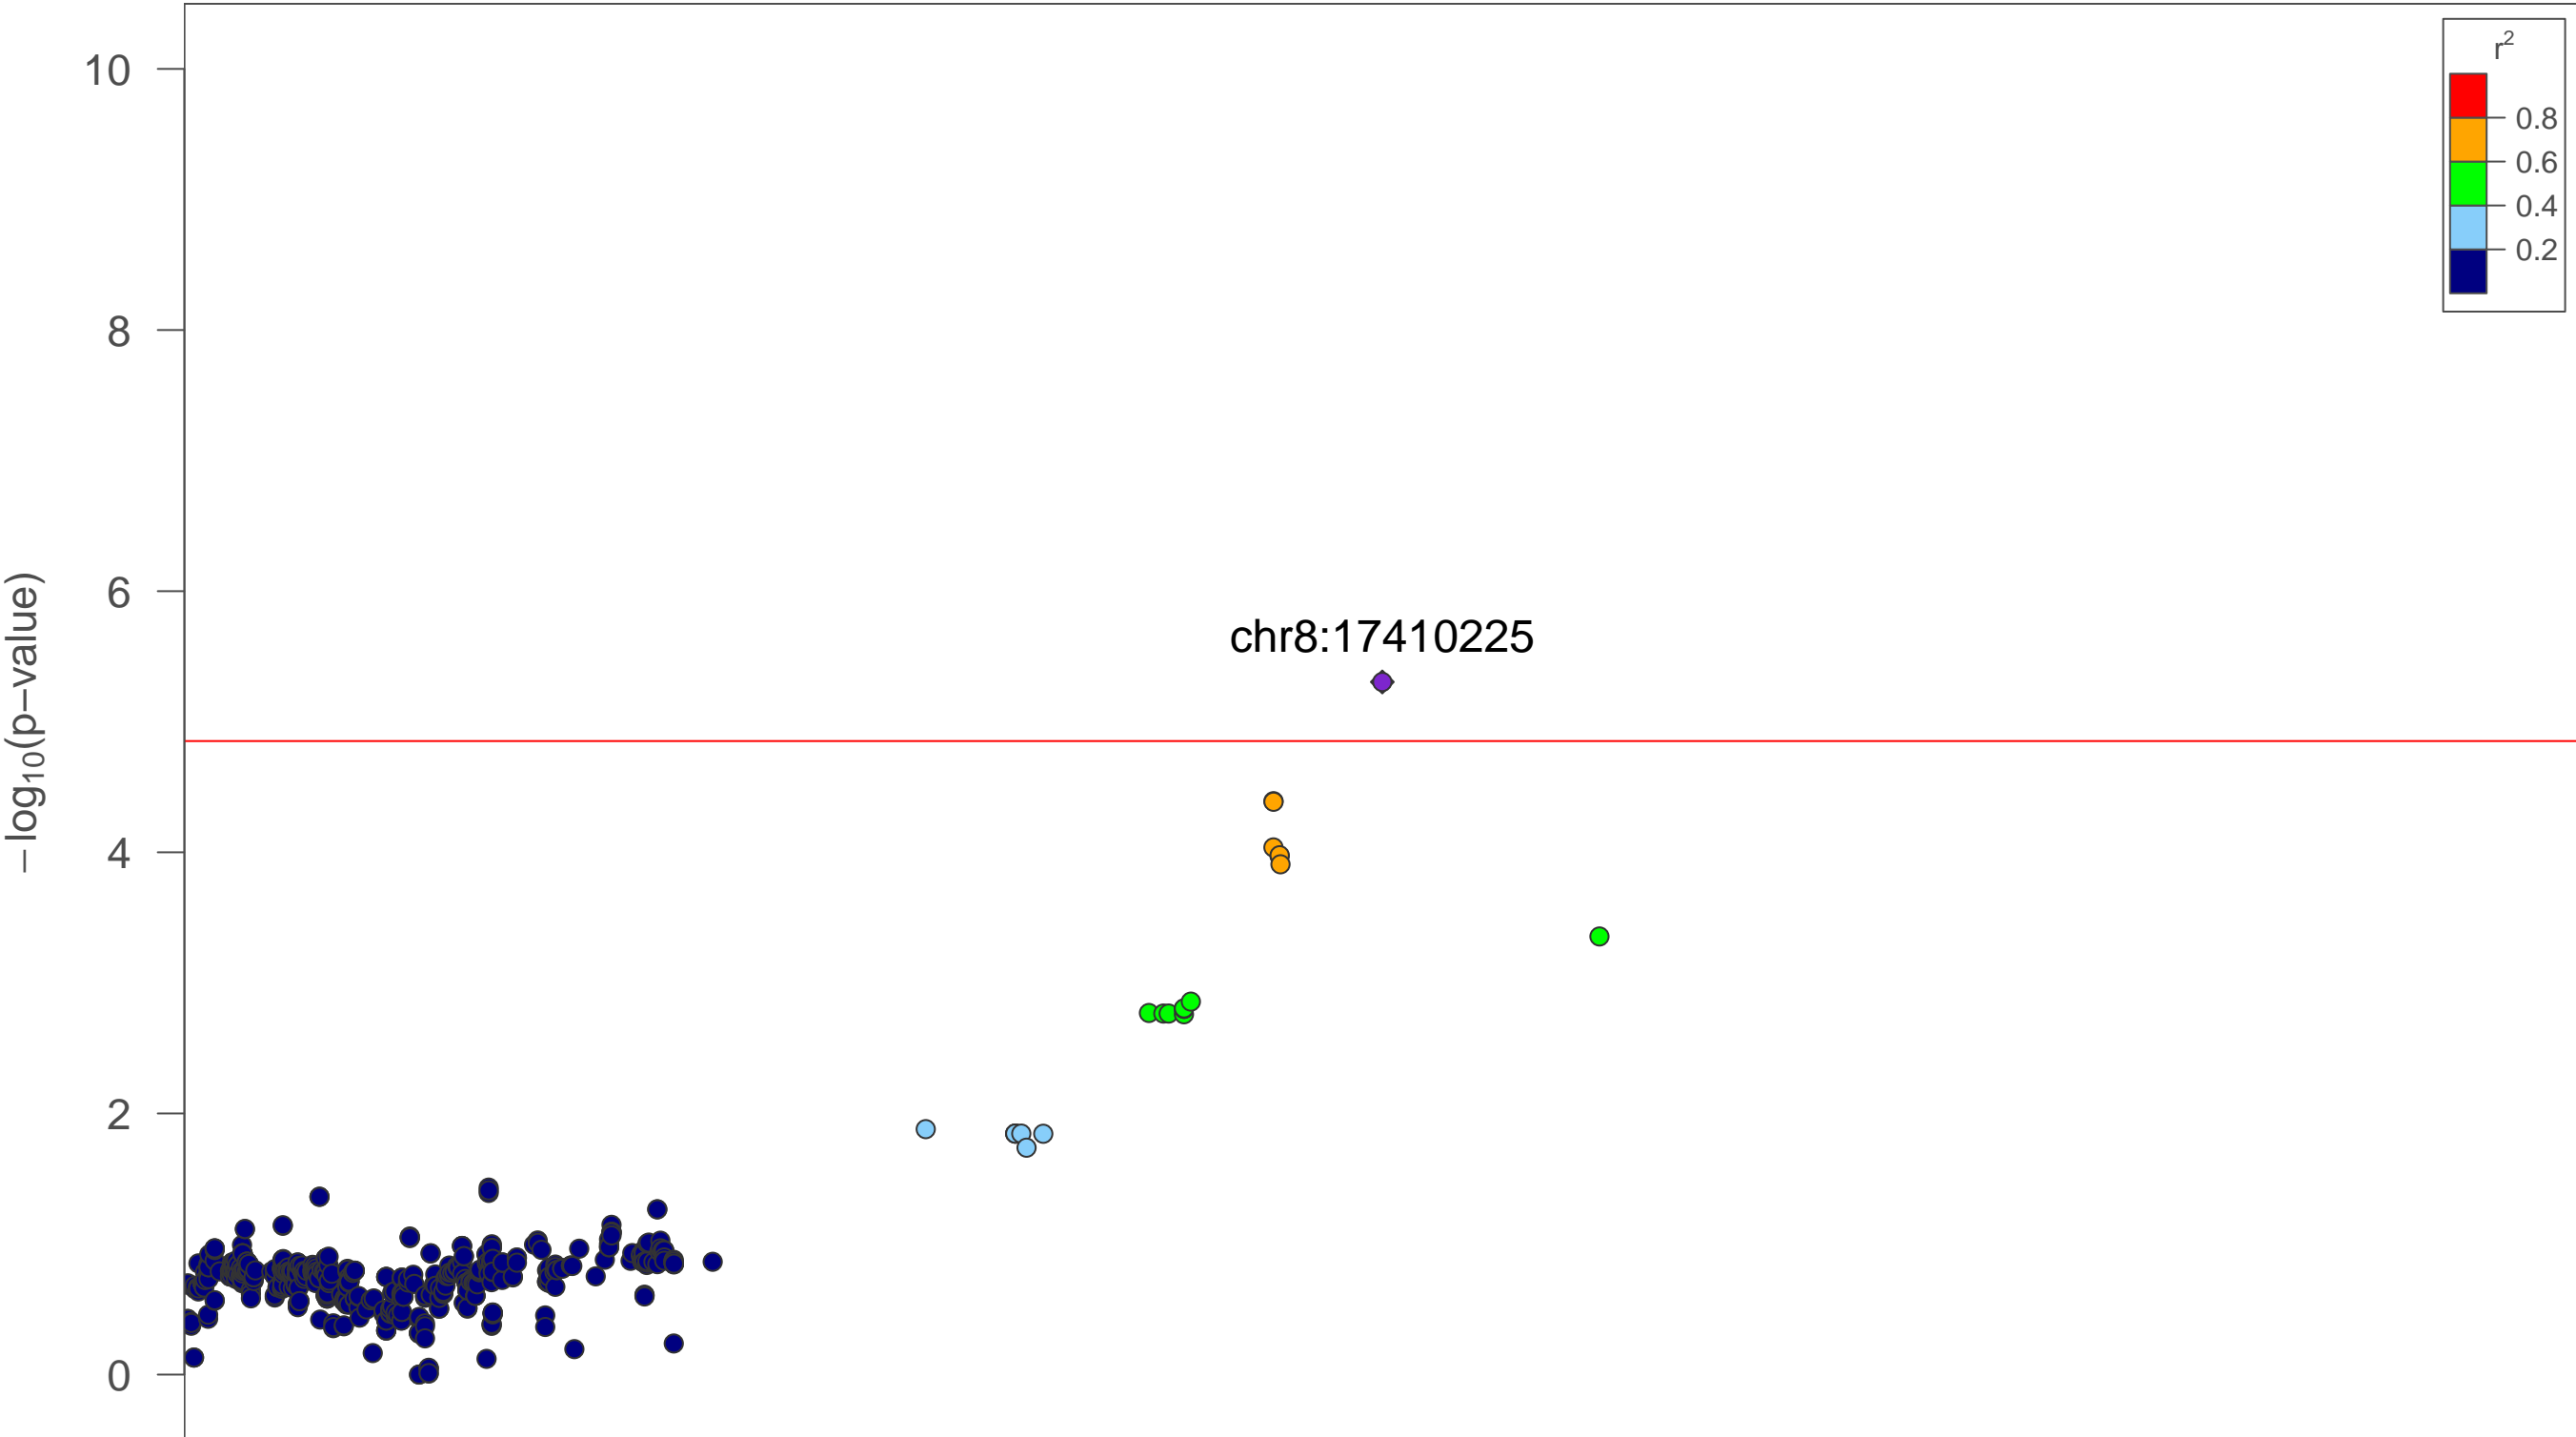

Credible Set

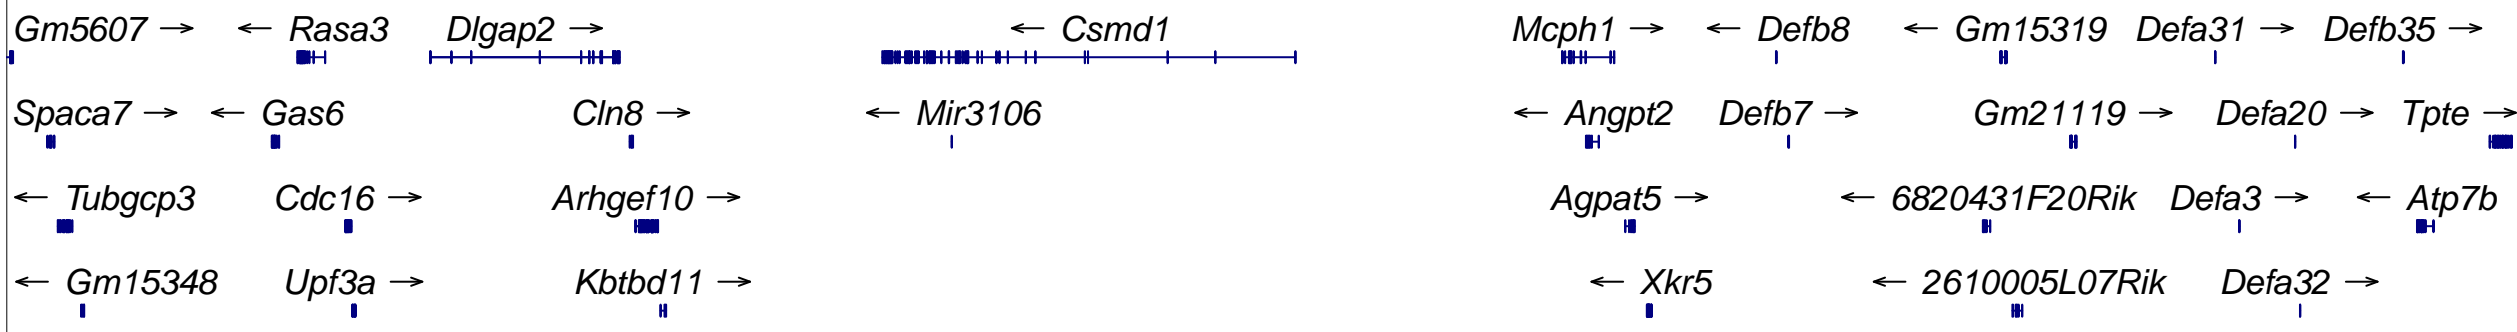

96 genes  
omitted

date: Thu Oct 25 17:19:03 2018

build: F34GBS

display range: chr8:12410225–22410225 [12410225–22410225]

hilite range: 0 – 0 [ 0 – 0 ]

reference SNP: chr8:17410225

number of SNPs plotted: 596

min P-value: 4.96E–6 [chr8:17410225]

max P-value: 9.99E–1 [chr8:13390417]

omitted Genes: Atp11a, Gm15350, Mcf2l

omitted Genes: Gm38671, F7, F10

omitted Genes: Proz, Pcid2, Cul4a

omitted Genes: Mir7065, Lamp1, Grtp1

omitted Genes: Mir1968, Adprhl1, Dcun1d2

omitted Genes: Tmco3, Tfdp1, Atp4b

omitted Genes: Grk1, Tmem255b, 1700029H14Rik

omitted Genes: 4932443I19Rik, AF366264, Champ1

omitted Genes: Coprs, Fbxo25, Tdrp

omitted Genes: Gm5907, Erich1, BB014433

omitted Genes: Myom2, Defb40, Defb37

omitted Genes: Defb38, Defb39, Defb12

omitted Genes: Defb34, Spag11b, Spag11a

omitted Genes: Defb14, Defb4, Defa-ps12

omitted Genes: Defb6, Defb46, Defb5

omitted Genes: Defb3, Defa-ps13, 4930467E23Rik

omitted Genes: Gm21944, Defb33, Gm15056

omitted Genes: Gm6040, AY761185, Defa21

omitted Genes: Defa23, Defa35, Defa25

omitted Genes: Gm14851, Defa30, Defa22

omitted Genes: Gm15293, Gm15292, Defa5

omitted Genes: Defa27, Defa29, Defa2

omitted Genes: Defa33, Defa36, Gm7849

omitted Genes: Defa37, Defa28, Gm7861

omitted Genes: Defa26, Defa17, Defa34

omitted Genes: Defa-ps1, AY761184, Defa24

omitted Genes: Defb1, Defb50, Defb2

omitted Genes: Defb10, Defb9, Defb11

omitted Genes: Defb15, Defb13, Fam90a1a

omitted Genes: Ccdc70, Alg11, Nek5

omitted Genes: Nek3, Ckap2, Vps36

omitted Genes: Thcd1, Slc25a15, 1810012K16Rik

Make more plots at <http://csg.sph.umich.edu/locuszoom/>

Fine-mapping Regions

| snp           | chr | pos (Mb) | pp | group        | color  |
|---------------|-----|----------|----|--------------|--------|
| chr8:17410225 | 8   | 17.41023 | 1  | Credible Set | purple |

# F34 GBS, quadriceps femoris muscle weight (mg)

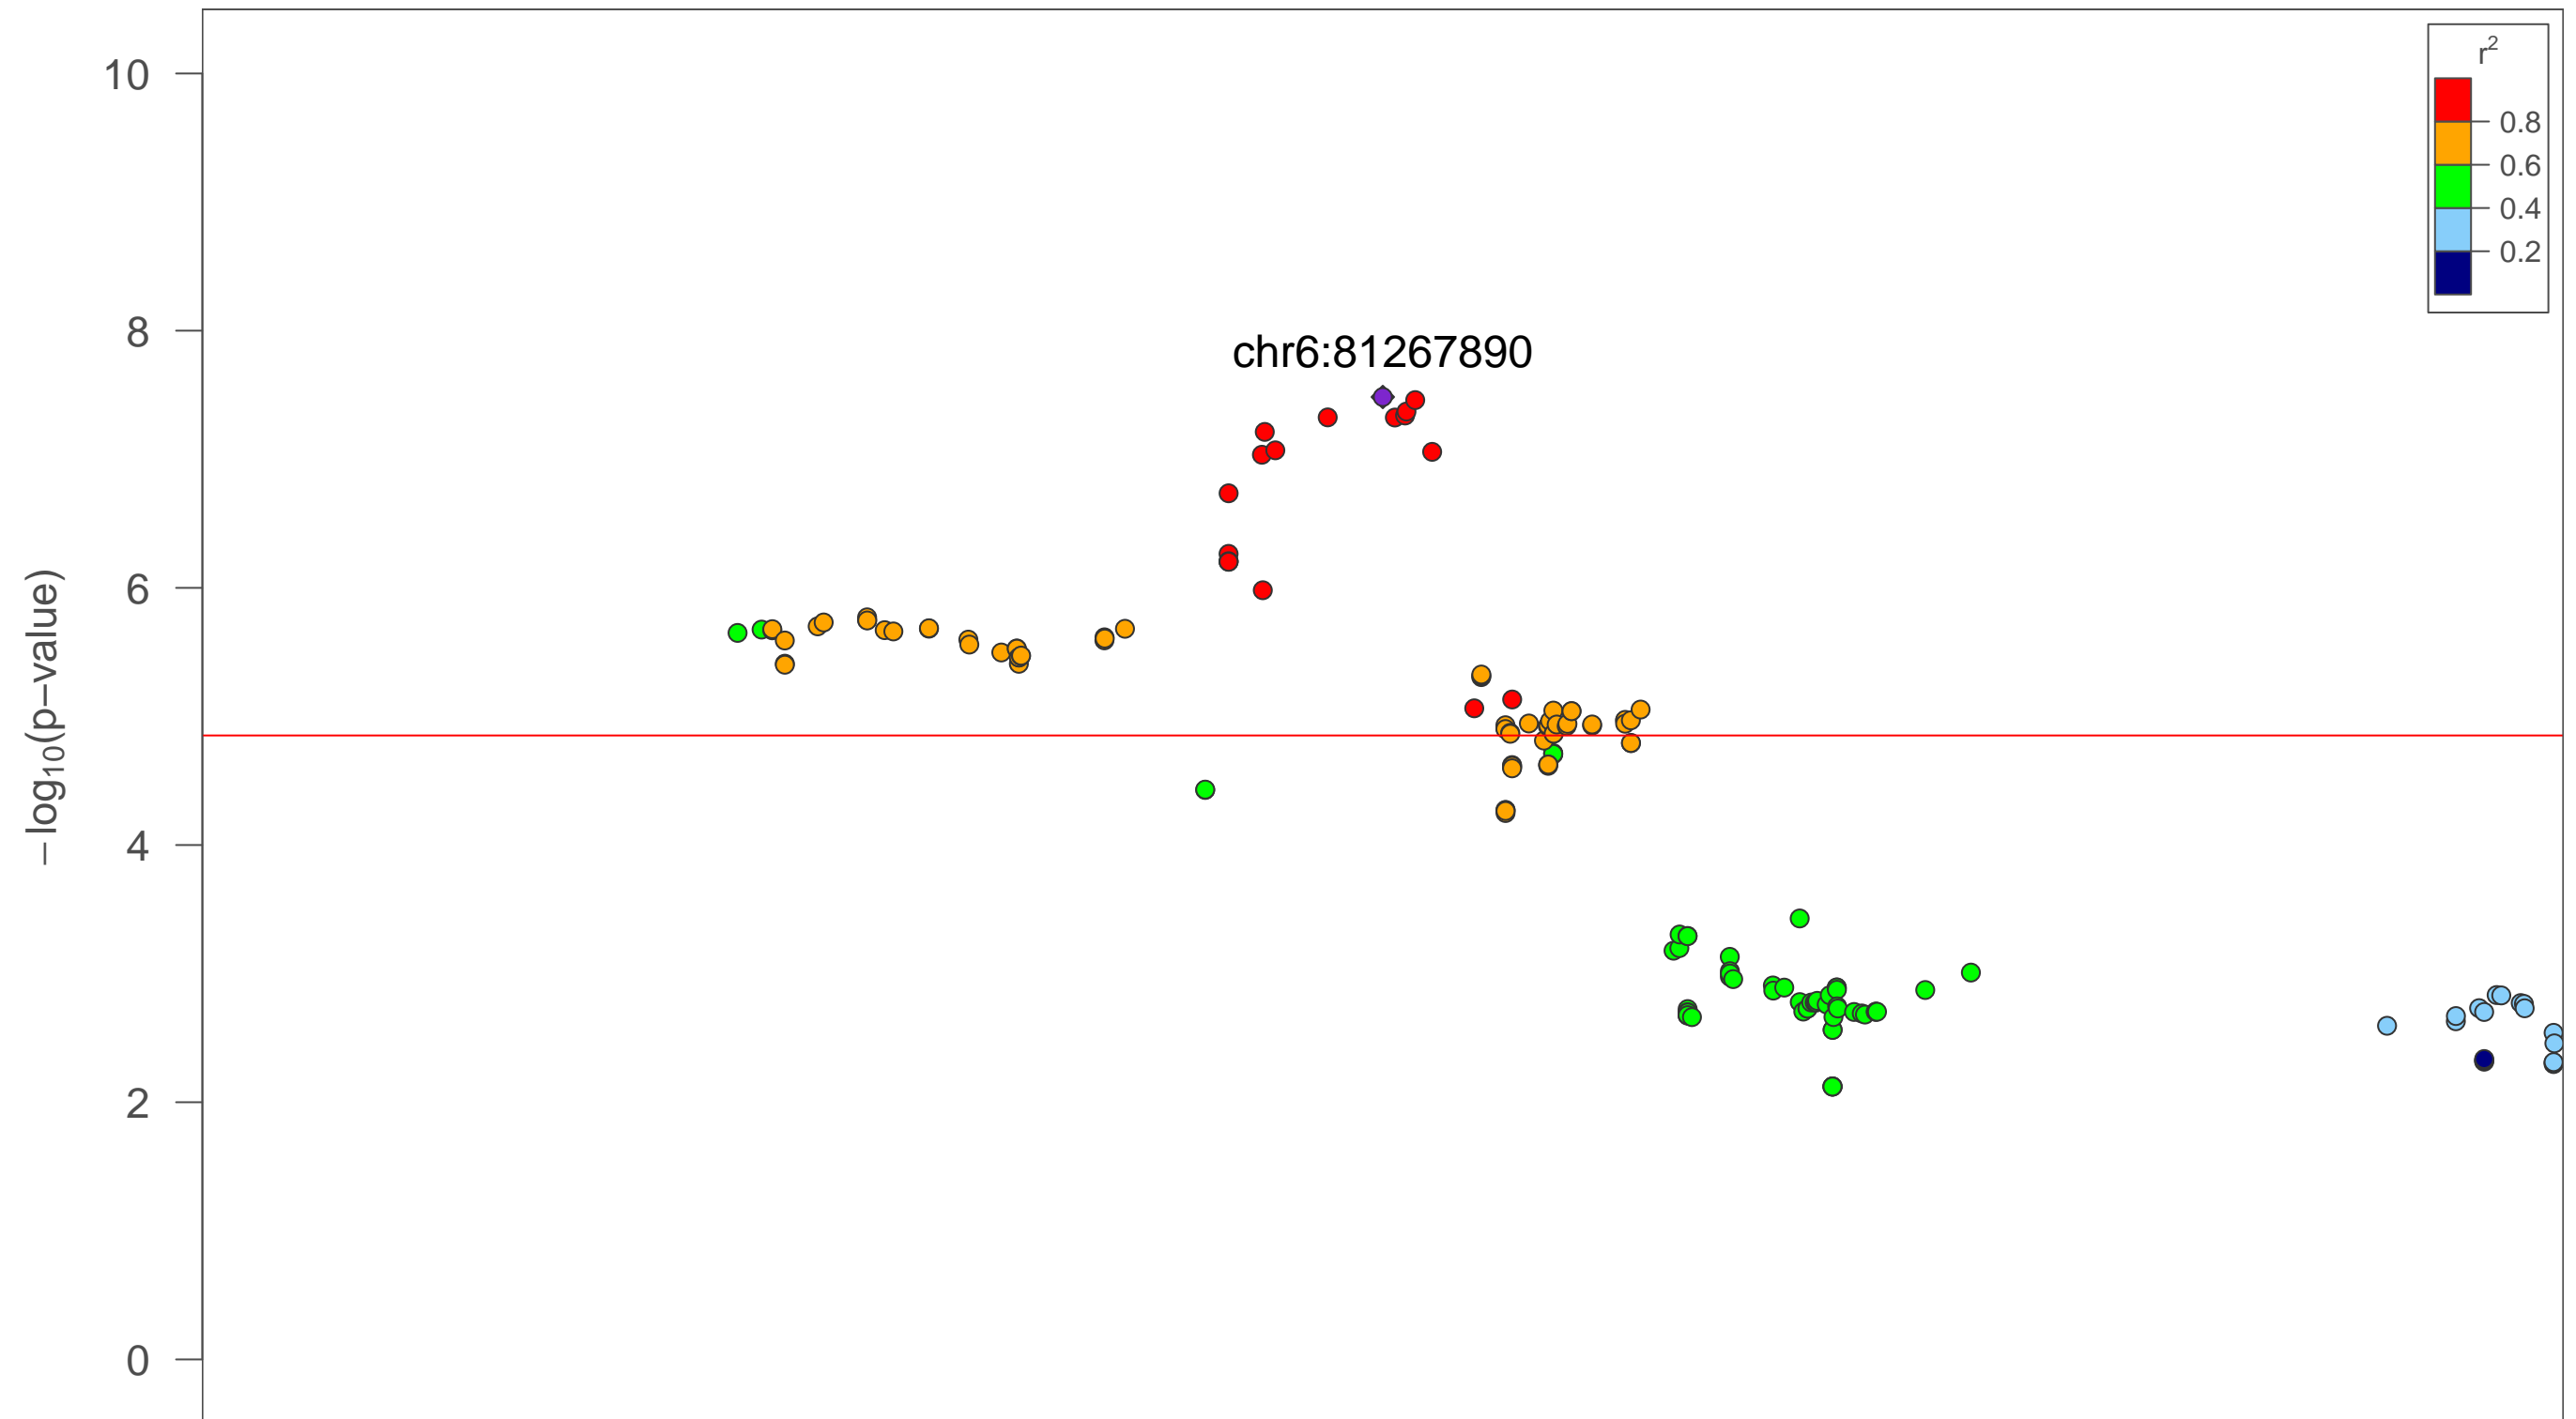

Credible Set

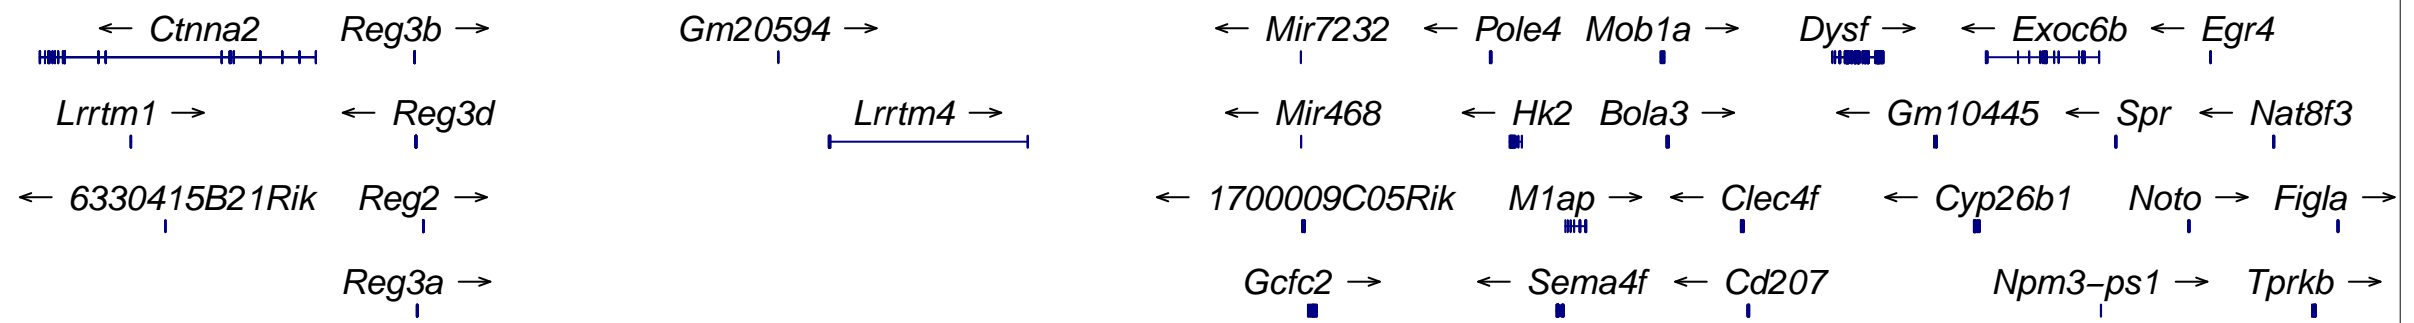

67 genes  
omitted

78

80

82

84

86

Position on chr6 (Mb)

date: Thu Oct 25 17:19:28 2018  
build: F34GBS  
display range: chr6:76267890–86267890 [76267890–86267890]  
hilite range: 0 – 0 [ 0 – 0 ]  
reference SNP: chr6:81267890  
number of SNPs plotted: 166  
min P-value: 3.28E–8 [chr6:81267890]  
max P-value: 7.57E–3 [chr6:83172373]  
omitted Genes: Reg1, Reg3g, Gm20362  
omitted Genes: Mrpl19, Eva1a, Tacr1  
omitted Genes: 2310069B03Rik, Dok1, Loxl3  
omitted Genes: Mir7040, Htra2, Aup1  
omitted Genes: Dqx1, Tlx2, Pcgf1  
omitted Genes: Lbx2, Mir3470a, Ccdc142  
omitted Genes: Mrpl53, Mogs, Wbp1  
omitted Genes: Ino80b, Rtkn, Wdr54  
omitted Genes: 1700003E16Rik, Dctn1, Slc4a5  
omitted Genes: Mthfd2, Tet3, Mir6374  
omitted Genes: B230319C09Rik, Dguok, Actg2  
omitted Genes: Stambp, Gm21284, Vax2os  
omitted Genes: Vax2, Atp6v1b1, 1700124L16Rik  
omitted Genes: Ankrd53, Tex261, Gm7443  
omitted Genes: Nagk, Paip2b, Zfp638  
omitted Genes: Gm5878, Emx1, Sfxn5  
omitted Genes: Rab11fip5, Mir705, Smyd5  
omitted Genes: Pradc1, Cct7, Fbxo41  
omitted Genes: Alms1, Nat8f7, Mir6375  
omitted Genes: Alms1-ps2, Nat8f6, Nat8f5  
omitted Genes: Nat8, Nat8f2, Nat8f4  
omitted Genes: Nat8f1, Dusp11, Add2  
omitted Genes: Tgfa

Fine-mapping Regions

| snp           | chr | pos (Mb) | pp          | group        | color  |
|---------------|-----|----------|-------------|--------------|--------|
| chr6:80614710 | 6   | 80.61471 | 0.009415797 | Credible Set | purple |
| chr6:80614725 | 6   | 80.61473 | 0.008218335 | Credible Set | purple |
| chr6:80614740 | 6   | 80.61474 | 0.008298367 | Credible Set | purple |
| chr6:80614750 | 6   | 80.61475 | 0.008218335 | Credible Set | purple |
| chr6:80614907 | 6   | 80.61491 | 0.026822237 | Credible Set | purple |
| chr6:80755939 | 6   | 80.75594 | 0.052295576 | Credible Set | purple |
| chr6:80767933 | 6   | 80.76793 | 0.077712822 | Credible Set | purple |
| chr6:80812582 | 6   | 80.81258 | 0.056469459 | Credible Set | purple |
| chr6:81034488 | 6   | 81.03449 | 0.099977371 | Credible Set | purple |
| chr6:81267890 | 6   | 81.26789 | 0.142429680 | Credible Set | purple |
| chr6:81318989 | 6   | 81.31899 | 0.099719868 | Credible Set | purple |
| chr6:81362217 | 6   | 81.36222 | 0.103292735 | Credible Set | purple |
| chr6:81368112 | 6   | 81.36811 | 0.110689845 | Credible Set | purple |
| chr6:81405109 | 6   | 81.40511 | 0.134991257 | Credible Set | purple |
| chr6:81476902 | 6   | 81.47690 | 0.054991179 | Credible Set | purple |



F34 GBS, quadriceps femoris muscle weight (mg)

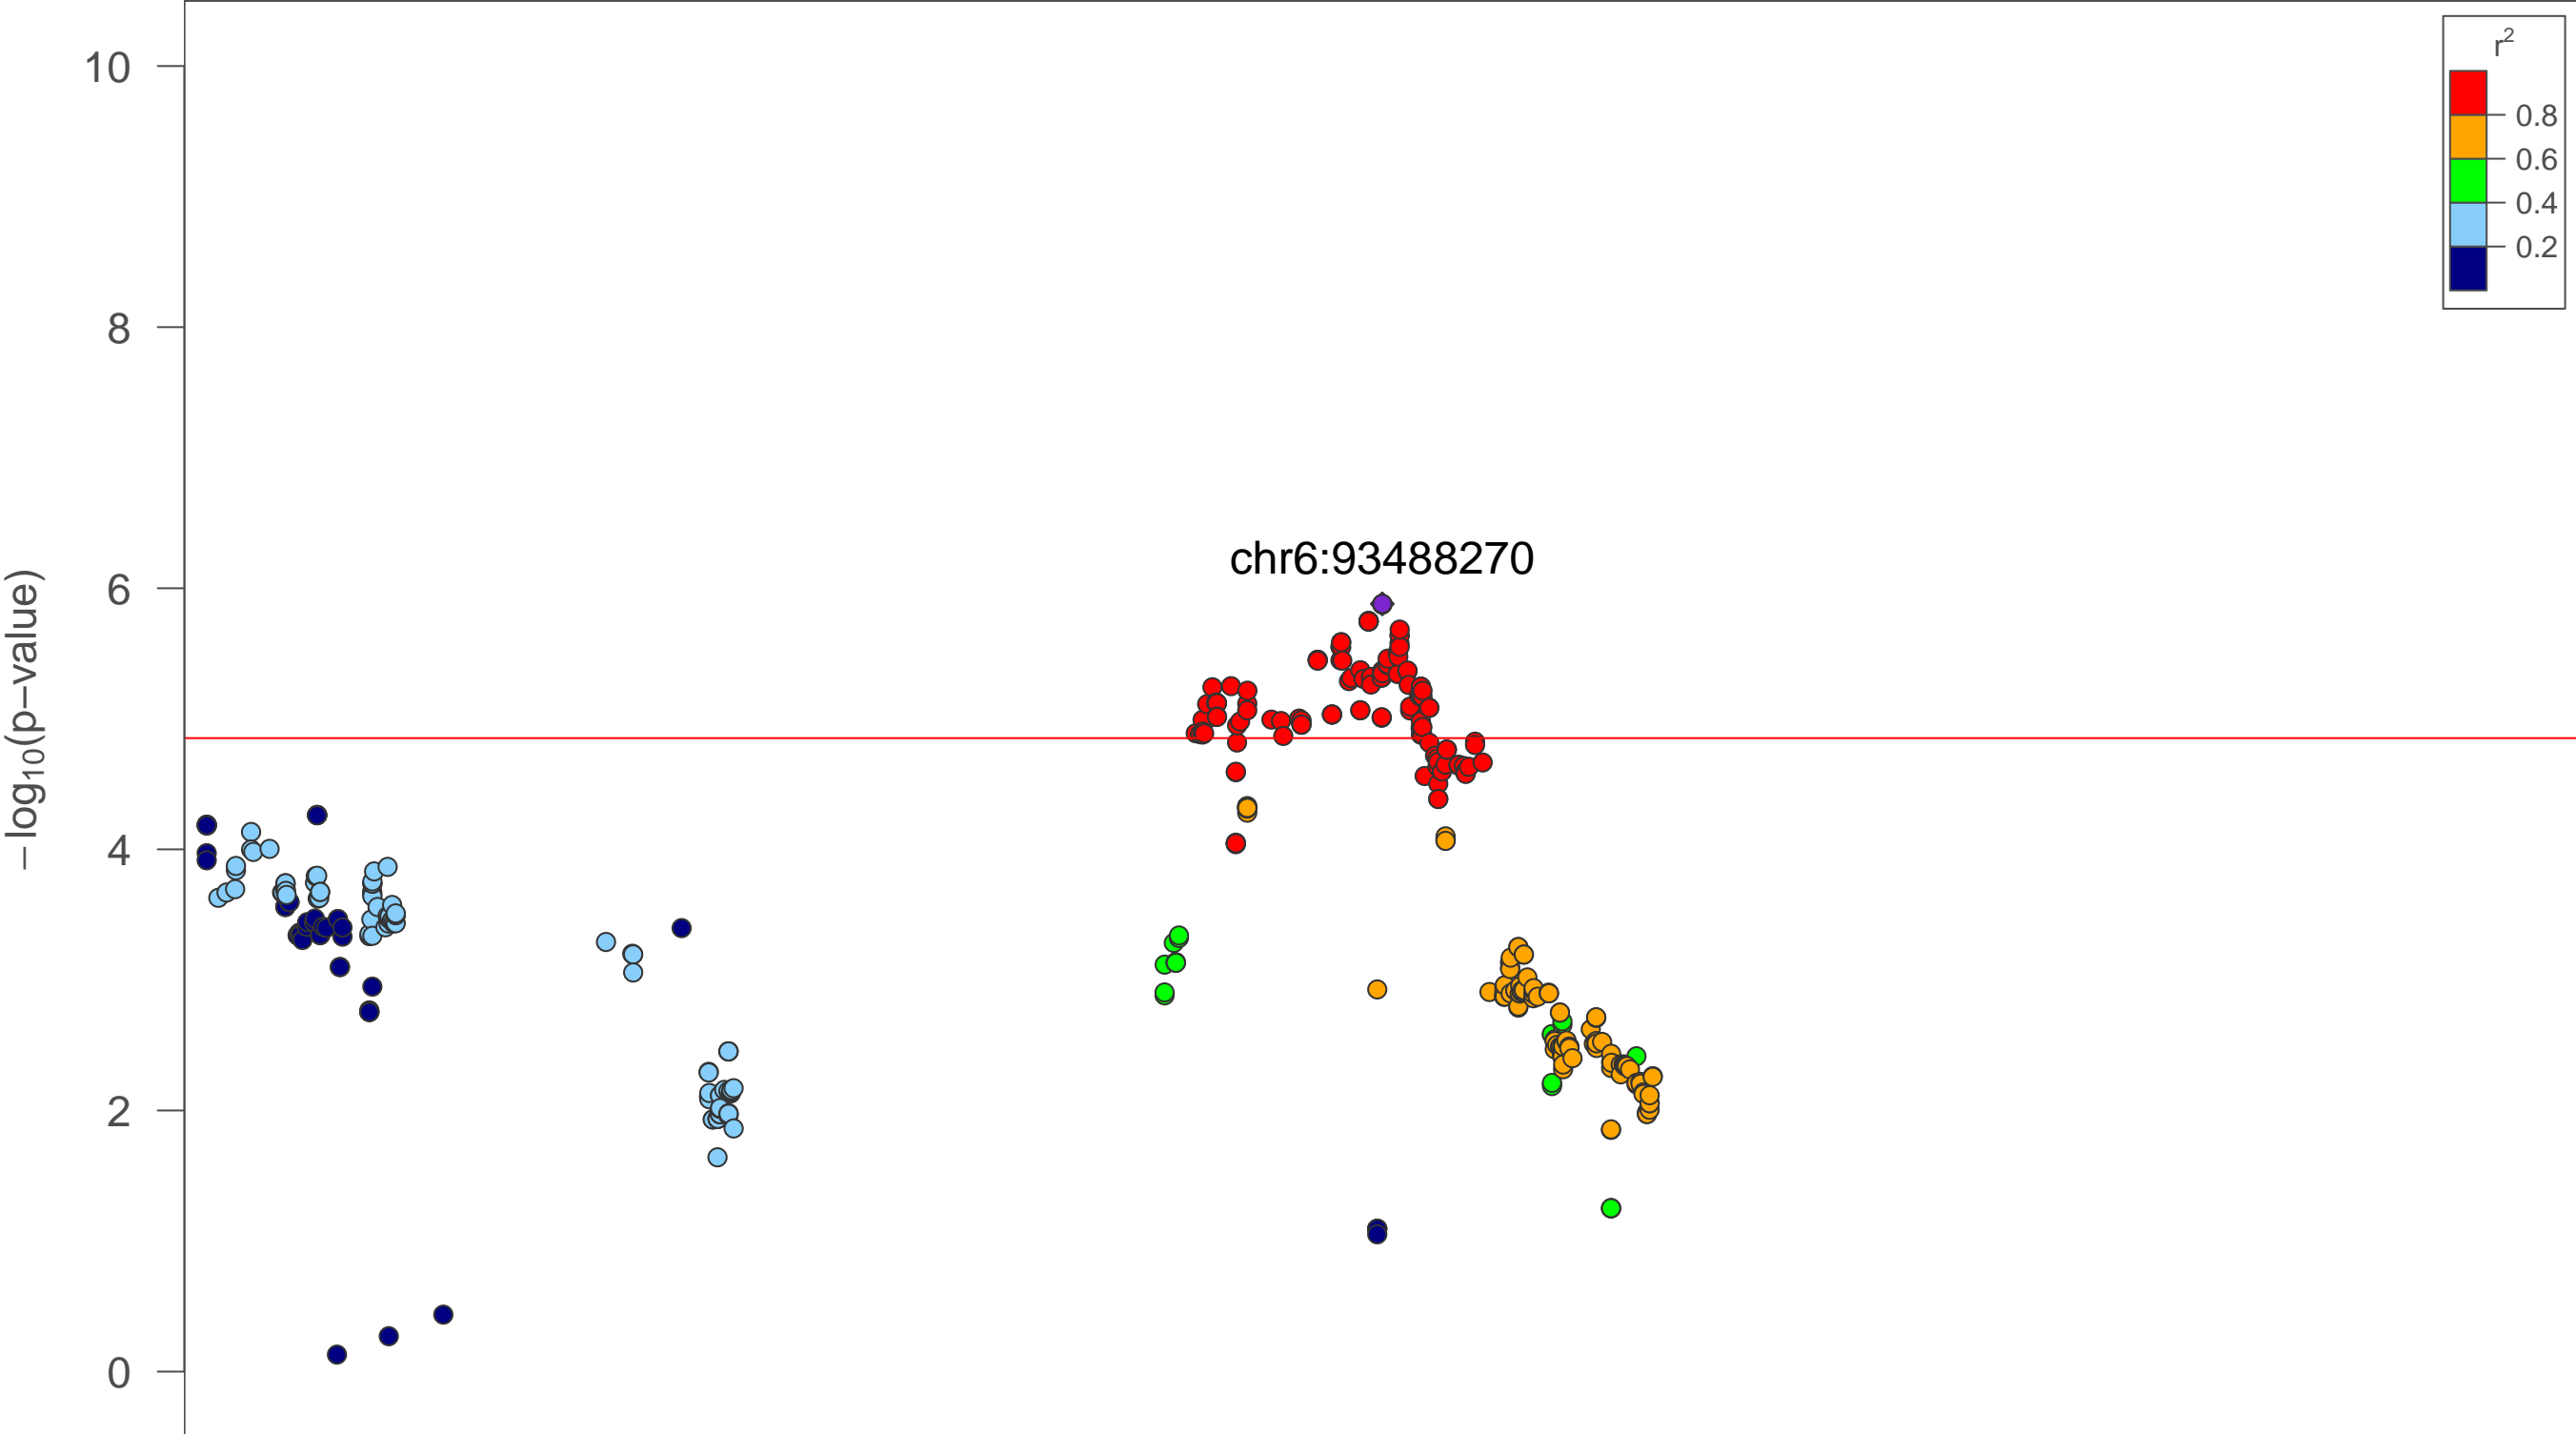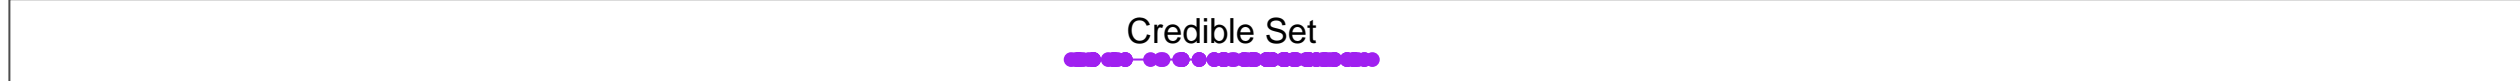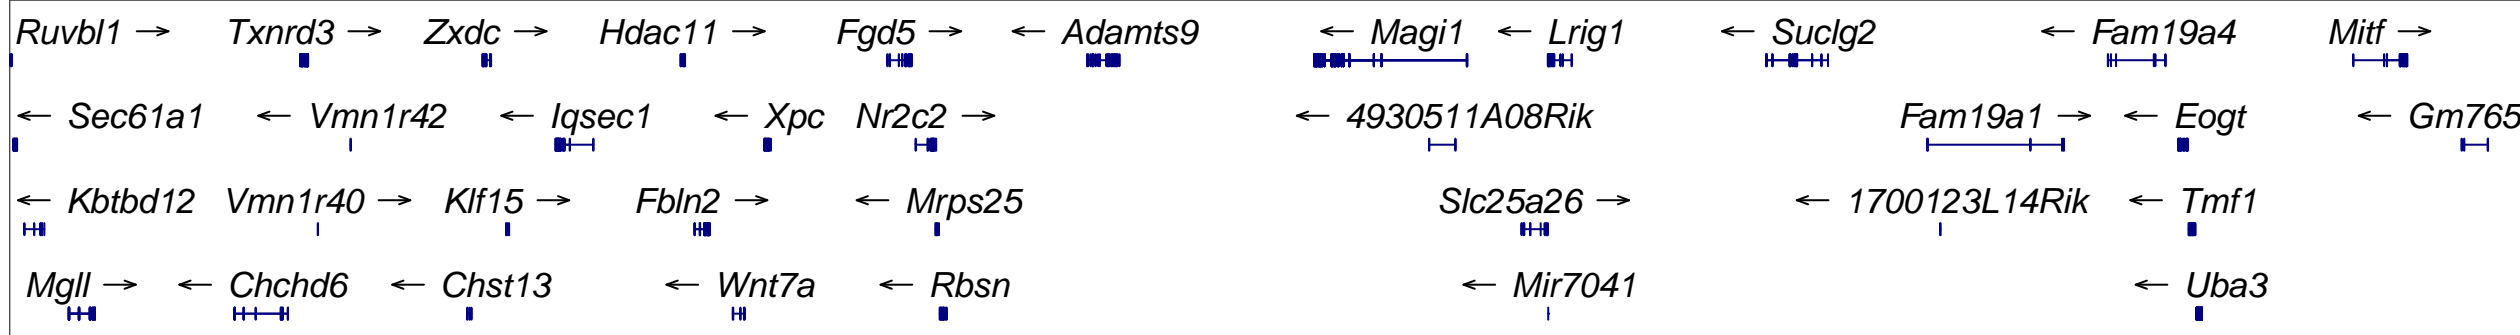

48 genes  
omitted

Position on chr6 (Mb)

date: Thu Oct 25 17:19:37 2018  
build: F34GBS  
display range: chr6:88488270–98488270 [88488270–98488270]  
hilite range: 0 – 0 [ 0 – 0 ]  
reference SNP: chr6:93488270  
number of SNPs plotted: 407  
min P-value: 1.32E–6 [chr6:93488270]  
max P-value: 7.41E–1 [chr6:89125612]  
omitted Genes: Abtb1, Podxl2, Gm15612  
omitted Genes: Mcm2, Tpra1, 4933427D06Rik  
omitted Genes: Gm1965, Gm839, 4930512J16Rik  
omitted Genes: Plxna1, Vmn1r41, Vmn1r43  
omitted Genes: Vmn1r44, Vmn1r45, Vmn1r46  
omitted Genes: Vmn1r47, Vmn1r48, Vmn1r49  
omitted Genes: Vmn1r50, Vmn1r51, Vmn1r52  
omitted Genes: V1ra8, Vmn1r53, Vmn1r54  
omitted Genes: BC048671, Uroc1, Cfap100  
omitted Genes: Aldh1l1, Slc41a3, Nup210  
omitted Genes: 4930471M09Rik, 1810044D09Rik, Chchd4  
omitted Genes: Tmem43, Lsm3, Slc6a6  
omitted Genes: Grip2, Ccdc174, 4930590J08Rik  
omitted Genes: Trh, Prickle2, 9530026P05Rik  
omitted Genes: 4930511E03Rik, Kbtbd8, AY512915  
omitted Genes: Arl6ip5, Lmod3, Frmd4b

Fine-mapping Regions

| snp           | chr | pos (Mb) | pp          | group        | color  |
|---------------|-----|----------|-------------|--------------|--------|
| chr6:92709583 | 6   | 92.70958 | 0.003651370 | Credible Set | purple |
| chr6:92727807 | 6   | 92.72781 | 0.003592184 | Credible Set | purple |
| chr6:92738290 | 6   | 92.73829 | 0.004579701 | Credible Set | purple |
| chr6:92738574 | 6   | 92.73857 | 0.003748828 | Credible Set | purple |
| chr6:92738612 | 6   | 92.73861 | 0.003572039 | Credible Set | purple |
| chr6:92744636 | 6   | 92.74464 | 0.003644646 | Credible Set | purple |
| chr6:92757091 | 6   | 92.75709 | 0.005968885 | Credible Set | purple |
| chr6:92779233 | 6   | 92.77923 | 0.007931589 | Credible Set | purple |
| chr6:92794752 | 6   | 92.79475 | 0.006126065 | Credible Set | purple |
| chr6:92798221 | 6   | 92.79822 | 0.006060561 | Credible Set | purple |
| chr6:92798236 | 6   | 92.79824 | 0.006060561 | Credible Set | purple |
| chr6:92798407 | 6   | 92.79841 | 0.004834126 | Credible Set | purple |
| chr6:92798441 | 6   | 92.79844 | 0.004803612 | Credible Set | purple |
| chr6:92857145 | 6   | 92.85715 | 0.008072631 | Credible Set | purple |
| chr6:92877050 | 6   | 92.87705 | 0.001897090 | Credible Set | purple |
| chr6:92877107 | 6   | 92.87711 | 0.001912643 | Credible Set | purple |
| chr6:92882118 | 6   | 92.88212 | 0.003122060 | Credible Set | purple |
| chr6:92882395 | 6   | 92.88240 | 0.004168587 | Credible Set | purple |
| chr6:92894714 | 6   | 92.89471 | 0.004447249 | Credible Set | purple |
| chr6:92924648 | 6   | 92.92465 | 0.006008710 | Credible Set | purple |
| chr6:92924684 | 6   | 92.92468 | 0.005369544 | Credible Set | purple |
| chr6:92925230 | 6   | 92.92523 | 0.007483354 | Credible Set | purple |
| chr6:93025394 | 6   | 93.02539 | 0.004592582 | Credible Set | purple |
| chr6:93065645 | 6   | 93.06565 | 0.004487367 | Credible Set | purple |
| chr6:93074839 | 6   | 93.07484 | 0.003487255 | Credible Set | purple |
| chr6:93141109 | 6   | 93.14111 | 0.004673172 | Credible Set | purple |
| chr6:93150410 | 6   | 93.15041 | 0.004505086 | Credible Set | purple |
| chr6:93150661 | 6   | 93.15066 | 0.004538087 | Credible Set | purple |
| chr6:93150825 | 6   | 93.15082 | 0.004210537 | Credible Set | purple |
| chr6:93150870 | 6   | 93.15087 | 0.004219324 | Credible Set | purple |
| chr6:93218675 | 6   | 93.21868 | 0.012614793 | Credible Set | purple |
| chr6:93218685 | 6   | 93.21868 | 0.012615602 | Credible Set | purple |
| chr6:93218689 | 6   | 93.21869 | 0.012408312 | Credible Set | purple |
| chr6:93278268 | 6   | 93.27827 | 0.005004540 | Credible Set | purple |
| chr6:93278280 | 6   | 93.27828 | 0.005004540 | Credible Set | purple |
| chr6:93278290 | 6   | 93.27829 | 0.005004540 | Credible Set | purple |

## Fine-mapping Regions

| snp           | chr | pos (Mb) | pp          | group        | color  |
|---------------|-----|----------|-------------|--------------|--------|
| chr6:93313781 | 6   | 93.31378 | 0.012508707 | Credible Set | purple |
| chr6:93313998 | 6   | 93.31400 | 0.015701627 | Credible Set | purple |
| chr6:93314001 | 6   | 93.31400 | 0.015749337 | Credible Set | purple |
| chr6:93316695 | 6   | 93.31669 | 0.016994413 | Credible Set | purple |
| chr6:93316707 | 6   | 93.31671 | 0.015605240 | Credible Set | purple |
| chr6:93316769 | 6   | 93.31677 | 0.016935319 | Credible Set | purple |
| chr6:93321239 | 6   | 93.32124 | 0.012427973 | Credible Set | purple |
| chr6:93349184 | 6   | 93.34918 | 0.008792167 | Credible Set | purple |
| chr6:93358542 | 6   | 93.35854 | 0.009266523 | Credible Set | purple |
| chr6:93396517 | 6   | 93.39652 | 0.005376651 | Credible Set | purple |
| chr6:93396531 | 6   | 93.39653 | 0.005376651 | Credible Set | purple |
| chr6:93396614 | 6   | 93.39661 | 0.010572450 | Credible Set | purple |
| chr6:93410238 | 6   | 93.41024 | 0.009119871 | Credible Set | purple |
| chr6:93431052 | 6   | 93.43105 | 0.024395752 | Credible Set | purple |
| chr6:93431078 | 6   | 93.43108 | 0.024135995 | Credible Set | purple |
| chr6:93431080 | 6   | 93.43108 | 0.024135995 | Credible Set | purple |
| chr6:93431081 | 6   | 93.43108 | 0.024135995 | Credible Set | purple |
| chr6:93431095 | 6   | 93.43109 | 0.024135995 | Credible Set | purple |
| chr6:93440971 | 6   | 93.44097 | 0.009437307 | Credible Set | purple |
| chr6:93440986 | 6   | 93.44099 | 0.008295711 | Credible Set | purple |
| chr6:93485590 | 6   | 93.48559 | 0.009333079 | Credible Set | purple |
| chr6:93485603 | 6   | 93.48560 | 0.009311901 | Credible Set | purple |
| chr6:93485684 | 6   | 93.48568 | 0.004734015 | Credible Set | purple |
| chr6:93485761 | 6   | 93.48576 | 0.004782209 | Credible Set | purple |
| chr6:93487880 | 6   | 93.48788 | 0.010479311 | Credible Set | purple |
| chr6:93488270 | 6   | 93.48827 | 0.032496395 | Credible Set | purple |
| chr6:93488305 | 6   | 93.48830 | 0.032485504 | Credible Set | purple |
| chr6:93488315 | 6   | 93.48832 | 0.032113205 | Credible Set | purple |
| chr6:93488485 | 6   | 93.48848 | 0.010037475 | Credible Set | purple |
| chr6:93510428 | 6   | 93.51043 | 0.011547964 | Credible Set | purple |
| chr6:93510476 | 6   | 93.51048 | 0.011652741 | Credible Set | purple |
| chr6:93510483 | 6   | 93.51048 | 0.011705898 | Credible Set | purple |
| chr6:93510591 | 6   | 93.51059 | 0.012851228 | Credible Set | purple |
| chr6:93552797 | 6   | 93.55280 | 0.009915162 | Credible Set | purple |
| chr6:93552882 | 6   | 93.55288 | 0.009929088 | Credible Set | purple |
| chr6:93552911 | 6   | 93.55291 | 0.014300970 | Credible Set | purple |

Fine-mapping Regions

| snp           | chr | pos (Mb) | pp          | group        | color  |
|---------------|-----|----------|-------------|--------------|--------|
| chr6:93555049 | 6   | 93.55505 | 0.013290510 | Credible Set | purple |
| chr6:93560069 | 6   | 93.56007 | 0.016617122 | Credible Set | purple |
| chr6:93560082 | 6   | 93.56008 | 0.019143733 | Credible Set | purple |
| chr6:93560724 | 6   | 93.56072 | 0.018899195 | Credible Set | purple |
| chr6:93560726 | 6   | 93.56073 | 0.015685733 | Credible Set | purple |
| chr6:93560747 | 6   | 93.56075 | 0.021029916 | Credible Set | purple |
| chr6:93593460 | 6   | 93.59346 | 0.010368451 | Credible Set | purple |
| chr6:93593464 | 6   | 93.59346 | 0.010523745 | Credible Set | purple |
| chr6:93598219 | 6   | 93.59822 | 0.008243905 | Credible Set | purple |
| chr6:93604482 | 6   | 93.60448 | 0.005360362 | Credible Set | purple |
| chr6:93604527 | 6   | 93.60453 | 0.005721503 | Credible Set | purple |
| chr6:93641872 | 6   | 93.64187 | 0.006908577 | Credible Set | purple |
| chr6:93648881 | 6   | 93.64888 | 0.004038566 | Credible Set | purple |
| chr6:93648927 | 6   | 93.64893 | 0.003935323 | Credible Set | purple |
| chr6:93648944 | 6   | 93.64894 | 0.006768429 | Credible Set | purple |
| chr6:93649344 | 6   | 93.64934 | 0.004467091 | Credible Set | purple |
| chr6:93649429 | 6   | 93.64943 | 0.008010358 | Credible Set | purple |
| chr6:93649450 | 6   | 93.64945 | 0.008010358 | Credible Set | purple |
| chr6:93649512 | 6   | 93.64951 | 0.003559046 | Credible Set | purple |
| chr6:93655527 | 6   | 93.65553 | 0.003559189 | Credible Set | purple |
| chr6:93655546 | 6   | 93.65555 | 0.004045917 | Credible Set | purple |
| chr6:93656134 | 6   | 93.65613 | 0.006752322 | Credible Set | purple |
| chr6:93656164 | 6   | 93.65616 | 0.007472931 | Credible Set | purple |
| chr6:93684217 | 6   | 93.68422 | 0.005596328 | Credible Set | purple |
| chr6:93684273 | 6   | 93.68427 | 0.005601768 | Credible Set | purple |
| chr6:93684716 | 6   | 93.68472 | 0.003108959 | Credible Set | purple |
| chr6:93708258 | 6   | 93.70826 | 0.002505461 | Credible Set | purple |
| chr6:93716266 | 6   | 93.71627 | 0.002378404 | Credible Set | purple |
| chr6:93718483 | 6   | 93.71848 | 0.002087457 | Credible Set | purple |
| chr6:93721362 | 6   | 93.72136 | 0.002257798 | Credible Set | purple |
| chr6:93737282 | 6   | 93.73728 | 0.001918222 | Credible Set | purple |
| chr6:93752696 | 6   | 93.75270 | 0.002155863 | Credible Set | purple |
| chr6:93757437 | 6   | 93.75744 | 0.002767976 | Credible Set | purple |
| chr6:93757440 | 6   | 93.75744 | 0.002773412 | Credible Set | purple |
| chr6:93757443 | 6   | 93.75744 | 0.002771953 | Credible Set | purple |
| chr6:93806708 | 6   | 93.80671 | 0.002114076 | Credible Set | purple |

Fine-mapping Regions

| snp           | chr | pos (Mb) | pp          | group        | color  |
|---------------|-----|----------|-------------|--------------|--------|
| chr6:93806963 | 6   | 93.80696 | 0.002148832 | Credible Set | purple |
| chr6:93806994 | 6   | 93.80699 | 0.002143401 | Credible Set | purple |
| chr6:93828162 | 6   | 93.82816 | 0.002106132 | Credible Set | purple |
| chr6:93835869 | 6   | 93.83587 | 0.001893876 | Credible Set | purple |
| chr6:93835874 | 6   | 93.83587 | 0.001878328 | Credible Set | purple |
| chr6:93836339 | 6   | 93.83634 | 0.001924572 | Credible Set | purple |
| chr6:93836347 | 6   | 93.83635 | 0.001867839 | Credible Set | purple |
| chr6:93850047 | 6   | 93.85005 | 0.002077286 | Credible Set | purple |
| chr6:93875308 | 6   | 93.87531 | 0.003169621 | Credible Set | purple |
| chr6:93875350 | 6   | 93.87535 | 0.002993688 | Credible Set | purple |
| chr6:93907106 | 6   | 93.90711 | 0.002233728 | Credible Set | purple |

F34 GBS, quadriceps femoris muscle weight (mg)

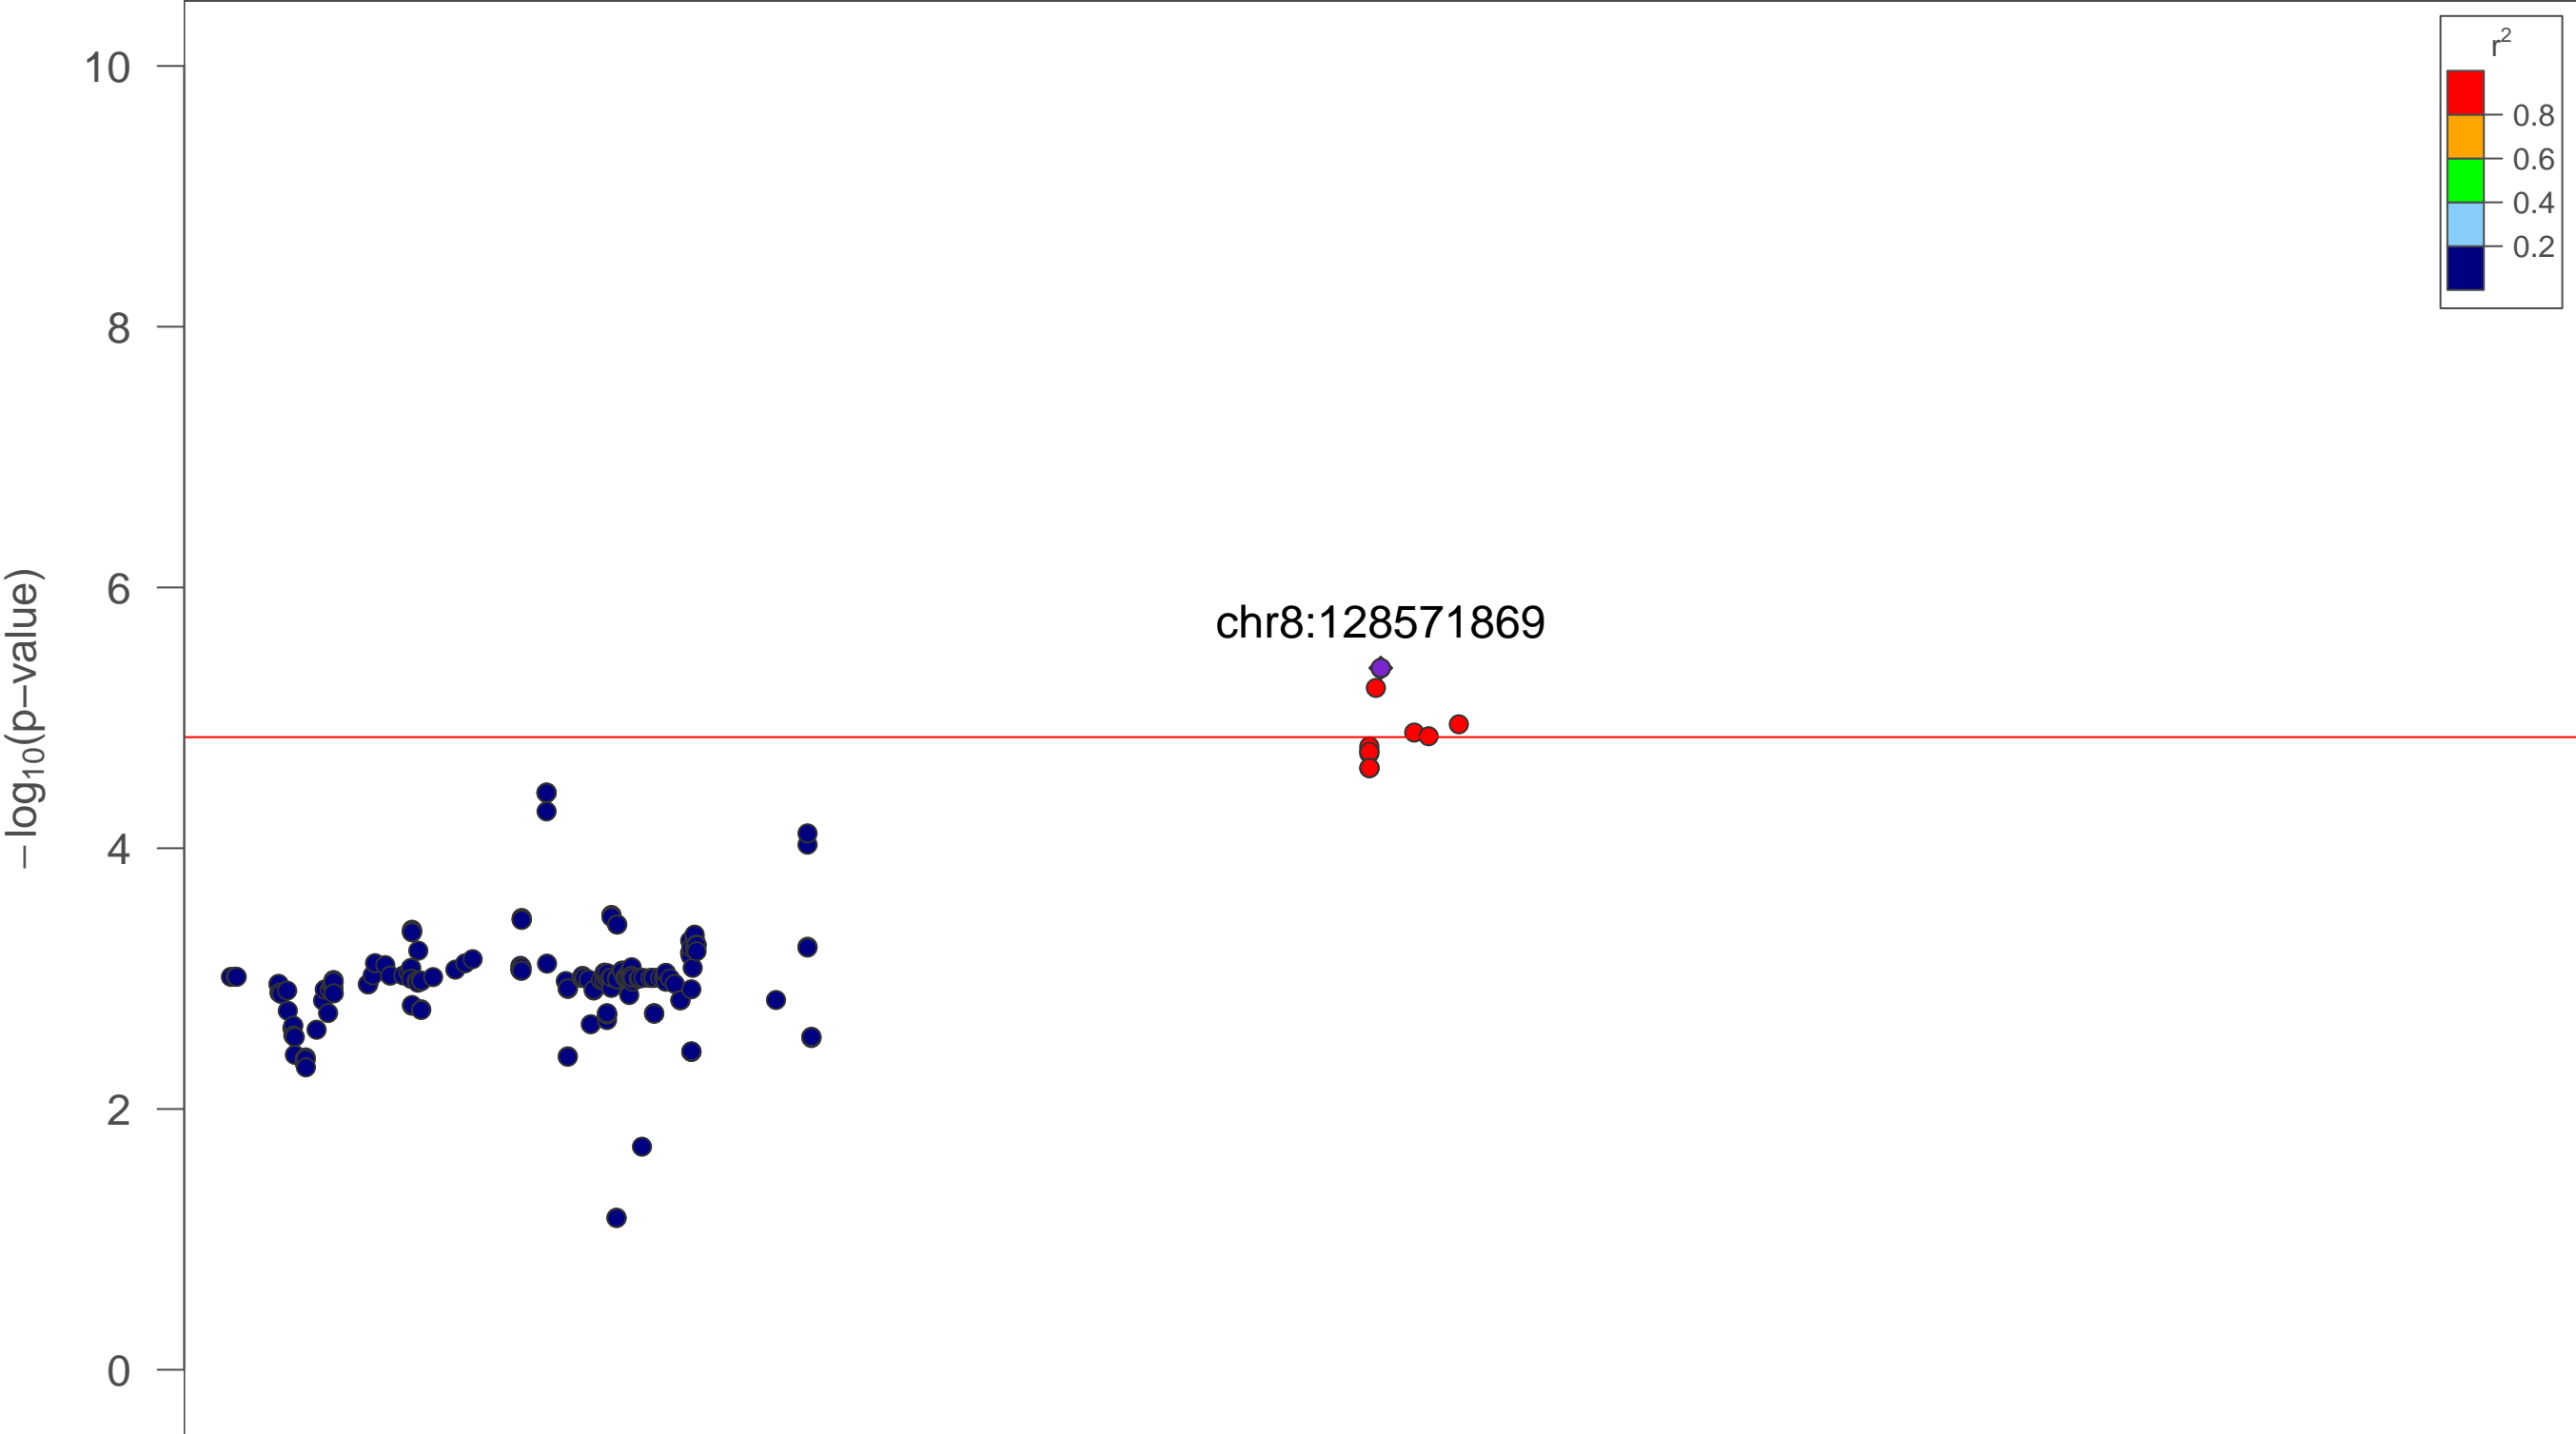

Credible Set

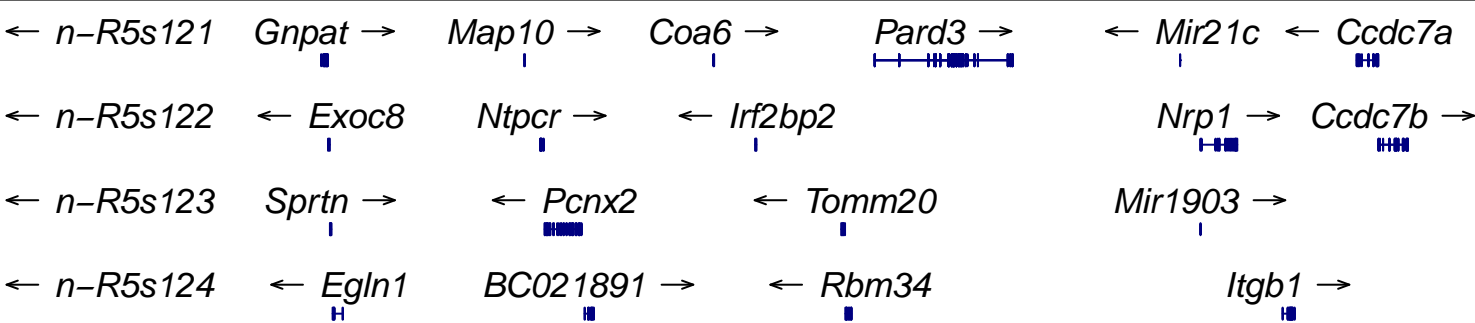

47 genes  
omitted

date: Thu Oct 25 17:19:48 2018  
build: F34GBS  
display range: chr8:123571869–133571869 [123571869–133571869]  
hilite range: 0 – 0 [ 0 – 0 ]  
reference SNP: chr8:128571869  
number of SNPs plotted: 191  
min P-value: 4.15E–6 [chr8:128571869]  
max P-value: 6.86E–2 [chr8:125378859]  
omitted Genes: n-R5s128, Gm26391, n-R5s133  
omitted Genes: n-R5s134, Rn5s, n-R5s136  
omitted Genes: n-R5s138, n-R5s139, Gm22109  
omitted Genes: n-R5s141, n-R5s142, n-R5s143  
omitted Genes: n-R5s144, Gm25212, n-R5s146  
omitted Genes: Gm22291, Gm23284, n-R5s149  
omitted Genes: Rhou, 6030466F02Rik, Rab4a  
omitted Genes: Ccsap, Acta1, Nup133  
omitted Genes: Abcb10, Taf5l, Mir1967  
omitted Genes: Urb2, Galnt2, Pgbd5  
omitted Genes: Cog2, Agt, Capn9  
omitted Genes: 2310022B05Rik, Ttc13, Arv1  
omitted Genes: Fam89a, Trim67, 2810004N23Rik  
omitted Genes: Tsnax, Disc1, Sipa1l2  
omitted Genes: 4930567H12Rik, Kcnk1, Slc35f3  
omitted Genes: Gm17296, 2610044O15Rik8



Fine-mapping Regions

| snp            | chr | pos (Mb) | pp         | group        | color  |
|----------------|-----|----------|------------|--------------|--------|
| chr8:128523972 | 8   | 128.5240 | 0.03751086 | Credible Set | purple |
| chr8:128524047 | 8   | 128.5240 | 0.03967617 | Credible Set | purple |
| chr8:128524048 | 8   | 128.5240 | 0.04232385 | Credible Set | purple |
| chr8:128524081 | 8   | 128.5241 | 0.03856074 | Credible Set | purple |
| chr8:128524424 | 8   | 128.5244 | 0.02941370 | Credible Set | purple |
| chr8:128524425 | 8   | 128.5244 | 0.02936529 | Credible Set | purple |
| chr8:128524441 | 8   | 128.5244 | 0.02942450 | Credible Set | purple |
| chr8:128551483 | 8   | 128.5515 | 0.11342310 | Credible Set | purple |
| chr8:128571869 | 8   | 128.5719 | 0.15873044 | Credible Set | purple |
| chr8:128571875 | 8   | 128.5719 | 0.15873044 | Credible Set | purple |
| chr8:128571887 | 8   | 128.5719 | 0.15788269 | Credible Set | purple |
| chr8:128711717 | 8   | 128.7117 | 0.05340323 | Credible Set | purple |
| chr8:128771719 | 8   | 128.7717 | 0.05017147 | Credible Set | purple |
| chr8:128898075 | 8   | 128.8981 | 0.06138352 | Credible Set | purple |

F34 GBS, quadriceps femoris muscle weight (mg)

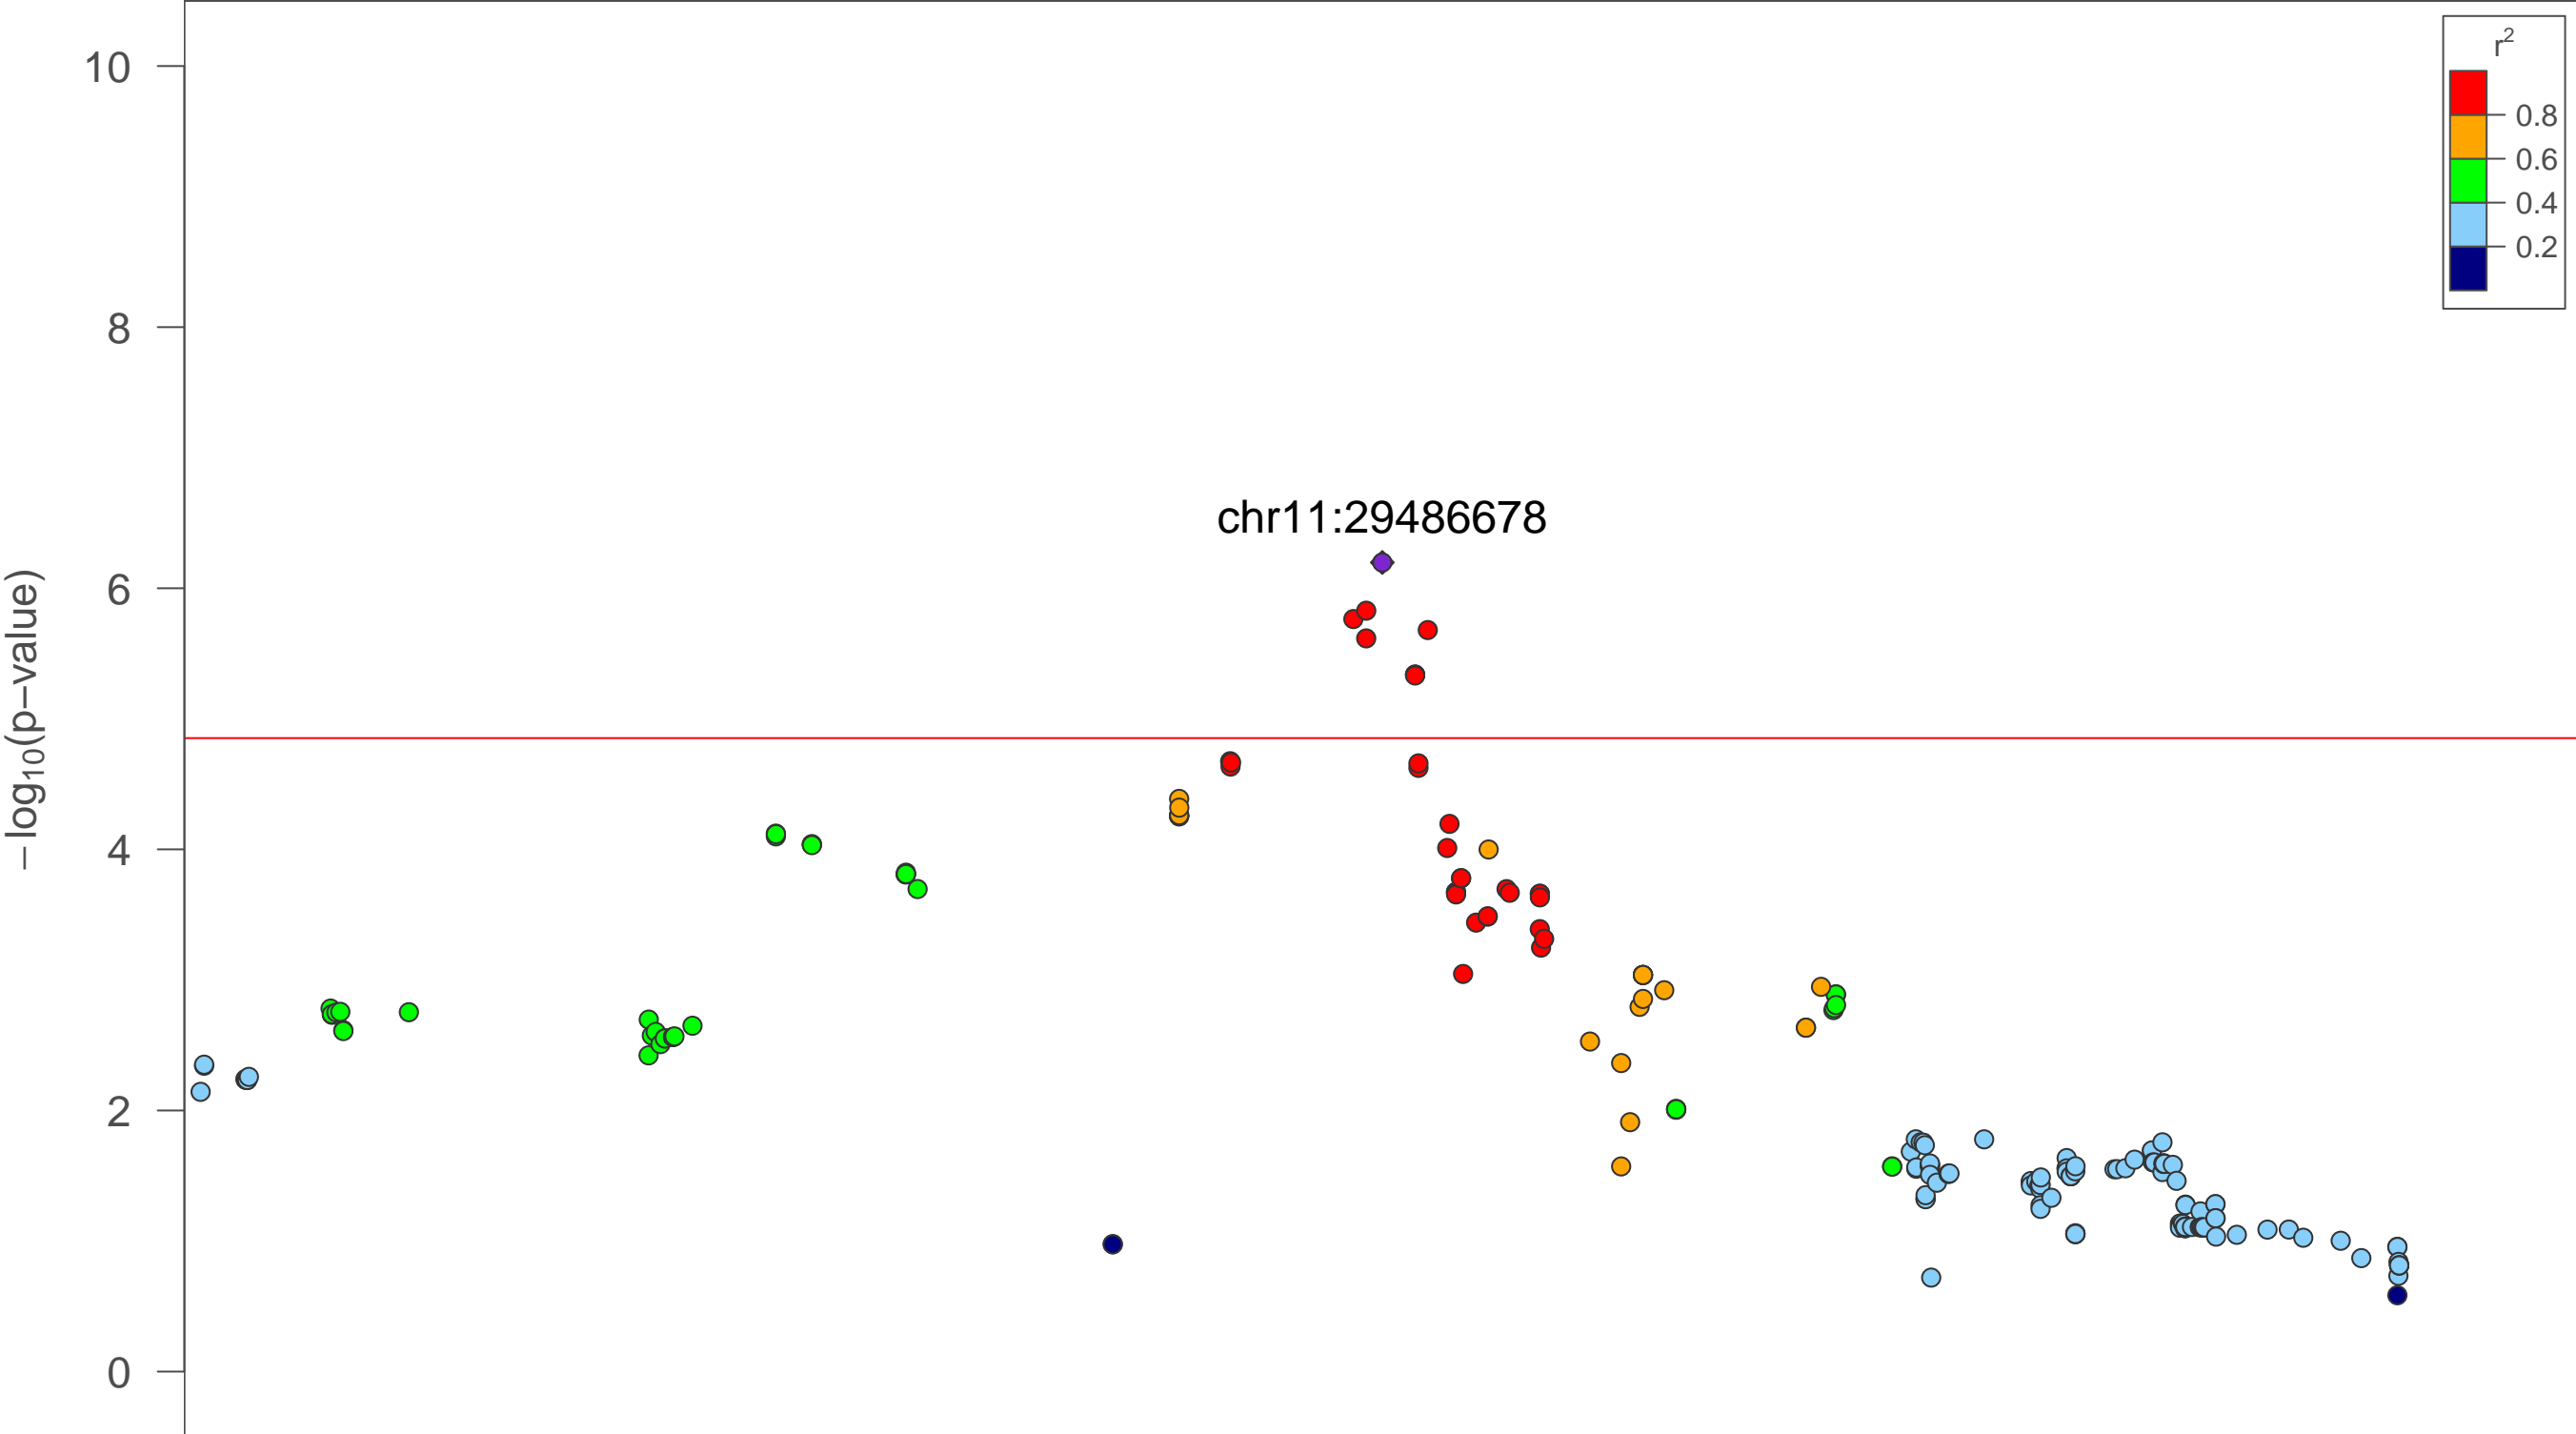

Credible Set

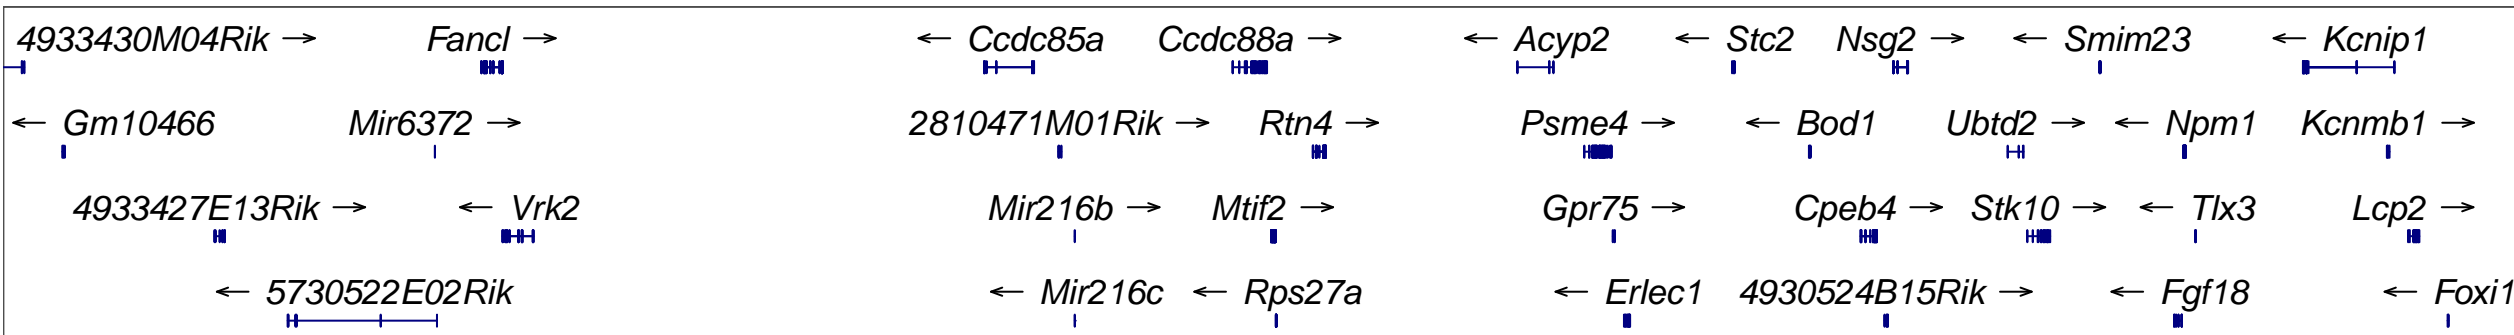

34 genes  
omitted

Position on chr11 (Mb)

date: Thu Oct 25 17:19:11 2018  
build: F34GBS  
display range: chr11:24486678–34486678 [24486678–34486678]  
hilite range: 0 – 0 [ 0 – 0 ]  
reference SNP: chr11:29486678  
number of SNPs plotted: 208  
min P-value: 6.35E–7 [chr11:29486678]  
max P-value: 2.6E–1 [chr11:33723026]  
omitted Genes: Gm12070, Mir216a, Mir217  
omitted Genes: Efemp1, Pnpt1, Smek2  
omitted Genes: Cfap36, Prorsd1, Clhc1  
omitted Genes: Eml6, 4931440F15Rik, Sptbn1  
omitted Genes: 4930505A04Rik, Asb3, Chac2  
omitted Genes: D630024D03Rik, Gm12108, Il9r  
omitted Genes: Snrnp25, Rhbdf1, Mpg  
omitted Genes: Nprl3, Hba–x, Hba–a1  
omitted Genes: Hbq1b, Hba–a2, Hbq1a  
omitted Genes: Sh3pxd2b, Efcab9, Fbxw11  
omitted Genes: Ranbp17, Gabrp, Dock2  
omitted Genes: Fam196b

Fine-mapping Regions

| snp            | chr | pos (Mb) | pp          | group        | color  |
|----------------|-----|----------|-------------|--------------|--------|
| chr11:28851860 | 11  | 28.85186 | 0.011196072 | Credible Set | purple |
| chr11:28853308 | 11  | 28.85331 | 0.010233745 | Credible Set | purple |
| chr11:28855496 | 11  | 28.85550 | 0.010963145 | Credible Set | purple |
| chr11:29365866 | 11  | 29.36587 | 0.123345163 | Credible Set | purple |
| chr11:29419484 | 11  | 29.41948 | 0.088878362 | Credible Set | purple |
| chr11:29419643 | 11  | 29.41964 | 0.142119135 | Credible Set | purple |
| chr11:29486678 | 11  | 29.48668 | 0.322110318 | Credible Set | purple |
| chr11:29623528 | 11  | 29.62353 | 0.048248804 | Credible Set | purple |
| chr11:29623531 | 11  | 29.62353 | 0.048135344 | Credible Set | purple |
| chr11:29623542 | 11  | 29.62354 | 0.047430361 | Credible Set | purple |
| chr11:29637584 | 11  | 29.63758 | 0.010014850 | Credible Set | purple |
| chr11:29637586 | 11  | 29.63759 | 0.010803516 | Credible Set | purple |
| chr11:29676398 | 11  | 29.67640 | 0.102343124 | Credible Set | purple |
| chr11:29757518 | 11  | 29.75752 | 0.002624170 | Credible Set | purple |
| chr11:29767130 | 11  | 29.76713 | 0.003921785 | Credible Set | purple |
| chr11:29794101 | 11  | 29.79410 | 0.001266856 | Credible Set | purple |
| chr11:29794488 | 11  | 29.79449 | 0.001248625 | Credible Set | purple |
| chr11:29815423 | 11  | 29.81542 | 0.001587720 | Credible Set | purple |
| chr11:29815516 | 11  | 29.81552 | 0.001587720 | Credible Set | purple |
| chr11:30005177 | 11  | 30.00518 | 0.001324759 | Credible Set | purple |
| chr11:30018452 | 11  | 30.01845 | 0.001247503 | Credible Set | purple |

# F34 GBS, quadriceps femoris muscle weight (mg)

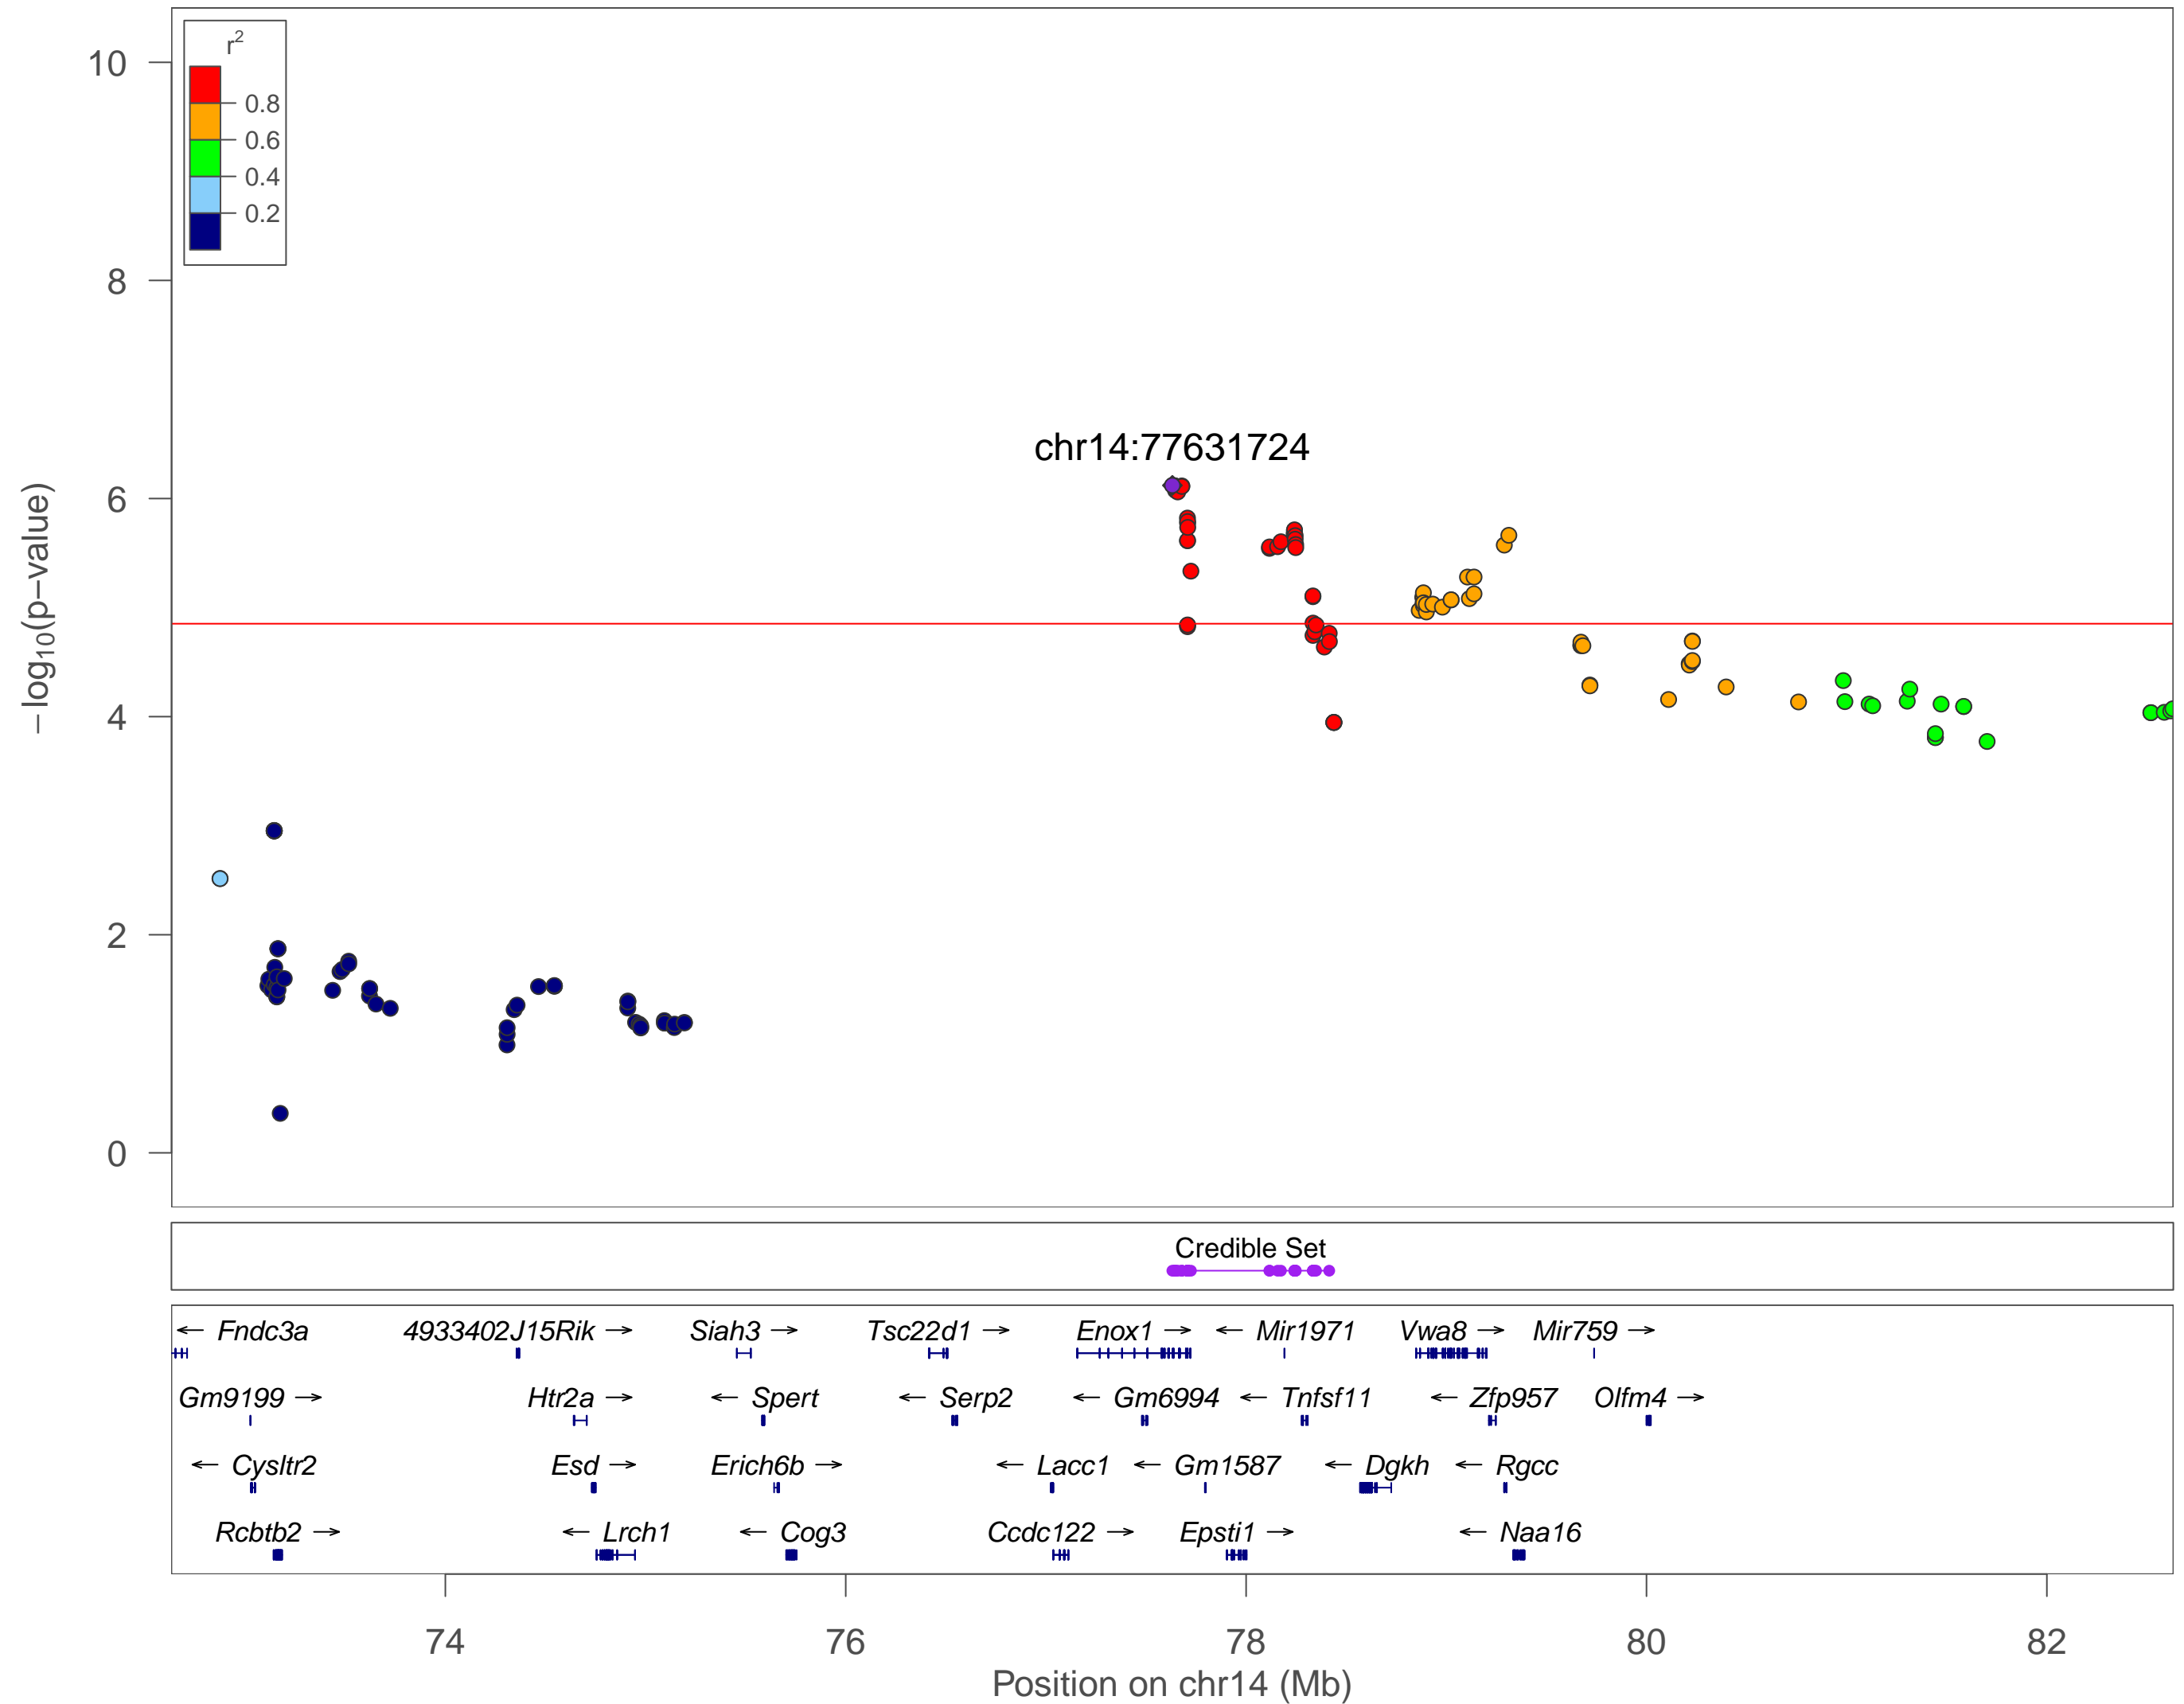

date: Thu Oct 25 17:19:19 2018

build: F34GBS

display range: chr14:72631724–82631724 [72631724–82631724]

hilite range: 0 – 0 [ 0 – 0 ]

reference SNP: chr14:77631724

number of SNPs plotted: 152

min P-value: 7.58E–7 [chr14:77631724]

max P-value: 4.34E–1 [chr14:73175203]

omitted Genes: Rb1, Mir687, Lpar6

omitted Genes: Itm2b, Med4, Nudt15

omitted Genes: Sucla2, Gm4278, 5031414D18Rik

omitted Genes: Lrrc63, Lcp1, Cpb2

omitted Genes: Zc3h13, Slc25a30, Gm4285

omitted Genes: Tpt1, Snora31, Gtf2f2

omitted Genes: Kctd4, Gpalpp1, Nufip1

omitted Genes: 4930444M15Rik, 1700108F19Rik, Dnajc15

omitted Genes: Fam216b, Akap11, Mtrf1

omitted Genes: Kbtbd7, Kbtbd6, Wbp4

omitted Genes: Elf1, Sugt1, Lect1

omitted Genes: 4930452G13Rik, Pcdh8, Gm10845

## Fine-mapping Regions

| snp            | chr | pos (Mb) | pp          | group        | color  |
|----------------|-----|----------|-------------|--------------|--------|
| chr14:77631724 | 14  | 77.63172 | 0.065951423 | Credible Set | purple |
| chr14:77642597 | 14  | 77.64260 | 0.065442836 | Credible Set | purple |
| chr14:77642802 | 14  | 77.64280 | 0.065442836 | Credible Set | purple |
| chr14:77647283 | 14  | 77.64728 | 0.059571500 | Credible Set | purple |
| chr14:77647687 | 14  | 77.64769 | 0.061712381 | Credible Set | purple |
| chr14:77658356 | 14  | 77.65836 | 0.057734634 | Credible Set | purple |
| chr14:77678847 | 14  | 77.67885 | 0.065206095 | Credible Set | purple |
| chr14:77678929 | 14  | 77.67893 | 0.064608702 | Credible Set | purple |
| chr14:77707033 | 14  | 77.70703 | 0.033959058 | Credible Set | purple |
| chr14:77707351 | 14  | 77.70735 | 0.021432720 | Credible Set | purple |
| chr14:77707392 | 14  | 77.70739 | 0.021526237 | Credible Set | purple |
| chr14:77707431 | 14  | 77.70743 | 0.003874422 | Credible Set | purple |
| chr14:77707491 | 14  | 77.70749 | 0.003776912 | Credible Set | purple |
| chr14:77707493 | 14  | 77.70749 | 0.003911421 | Credible Set | purple |
| chr14:77707780 | 14  | 77.70778 | 0.030662519 | Credible Set | purple |
| chr14:77707832 | 14  | 77.70783 | 0.031648653 | Credible Set | purple |
| chr14:77708407 | 14  | 77.70841 | 0.028103002 | Credible Set | purple |
| chr14:77724180 | 14  | 77.72418 | 0.011581226 | Credible Set | purple |
| chr14:78116598 | 14  | 78.11660 | 0.018378782 | Credible Set | purple |
| chr14:78116913 | 14  | 78.11691 | 0.018911253 | Credible Set | purple |
| chr14:78157408 | 14  | 78.15741 | 0.019006437 | Credible Set | purple |
| chr14:78173886 | 14  | 78.17389 | 0.021007088 | Credible Set | purple |
| chr14:78240912 | 14  | 78.24091 | 0.024711263 | Credible Set | purple |
| chr14:78240962 | 14  | 78.24096 | 0.025038119 | Credible Set | purple |
| chr14:78241501 | 14  | 78.24150 | 0.026369333 | Credible Set | purple |
| chr14:78241810 | 14  | 78.24181 | 0.026750039 | Credible Set | purple |
| chr14:78245017 | 14  | 78.24502 | 0.023761908 | Credible Set | purple |
| chr14:78245066 | 14  | 78.24507 | 0.022104762 | Credible Set | purple |
| chr14:78247459 | 14  | 78.24746 | 0.019855882 | Credible Set | purple |
| chr14:78247805 | 14  | 78.24780 | 0.018647975 | Credible Set | purple |
| chr14:78333693 | 14  | 78.33369 | 0.006912693 | Credible Set | purple |
| chr14:78333727 | 14  | 78.33373 | 0.007022265 | Credible Set | purple |
| chr14:78334235 | 14  | 78.33424 | 0.003168384 | Credible Set | purple |
| chr14:78334352 | 14  | 78.33435 | 0.004061125 | Credible Set | purple |
| chr14:78342935 | 14  | 78.34293 | 0.003405232 | Credible Set | purple |
| chr14:78349294 | 14  | 78.34929 | 0.003907212 | Credible Set | purple |

Fine-mapping Regions

| snp            | chr | pos (Mb) | pp          | group        | color  |
|----------------|-----|----------|-------------|--------------|--------|
| chr14:78415035 | 14  | 78.41504 | 0.003307998 | Credible Set | purple |



F34 GBS, tibialis anterior muscle weight (mg)

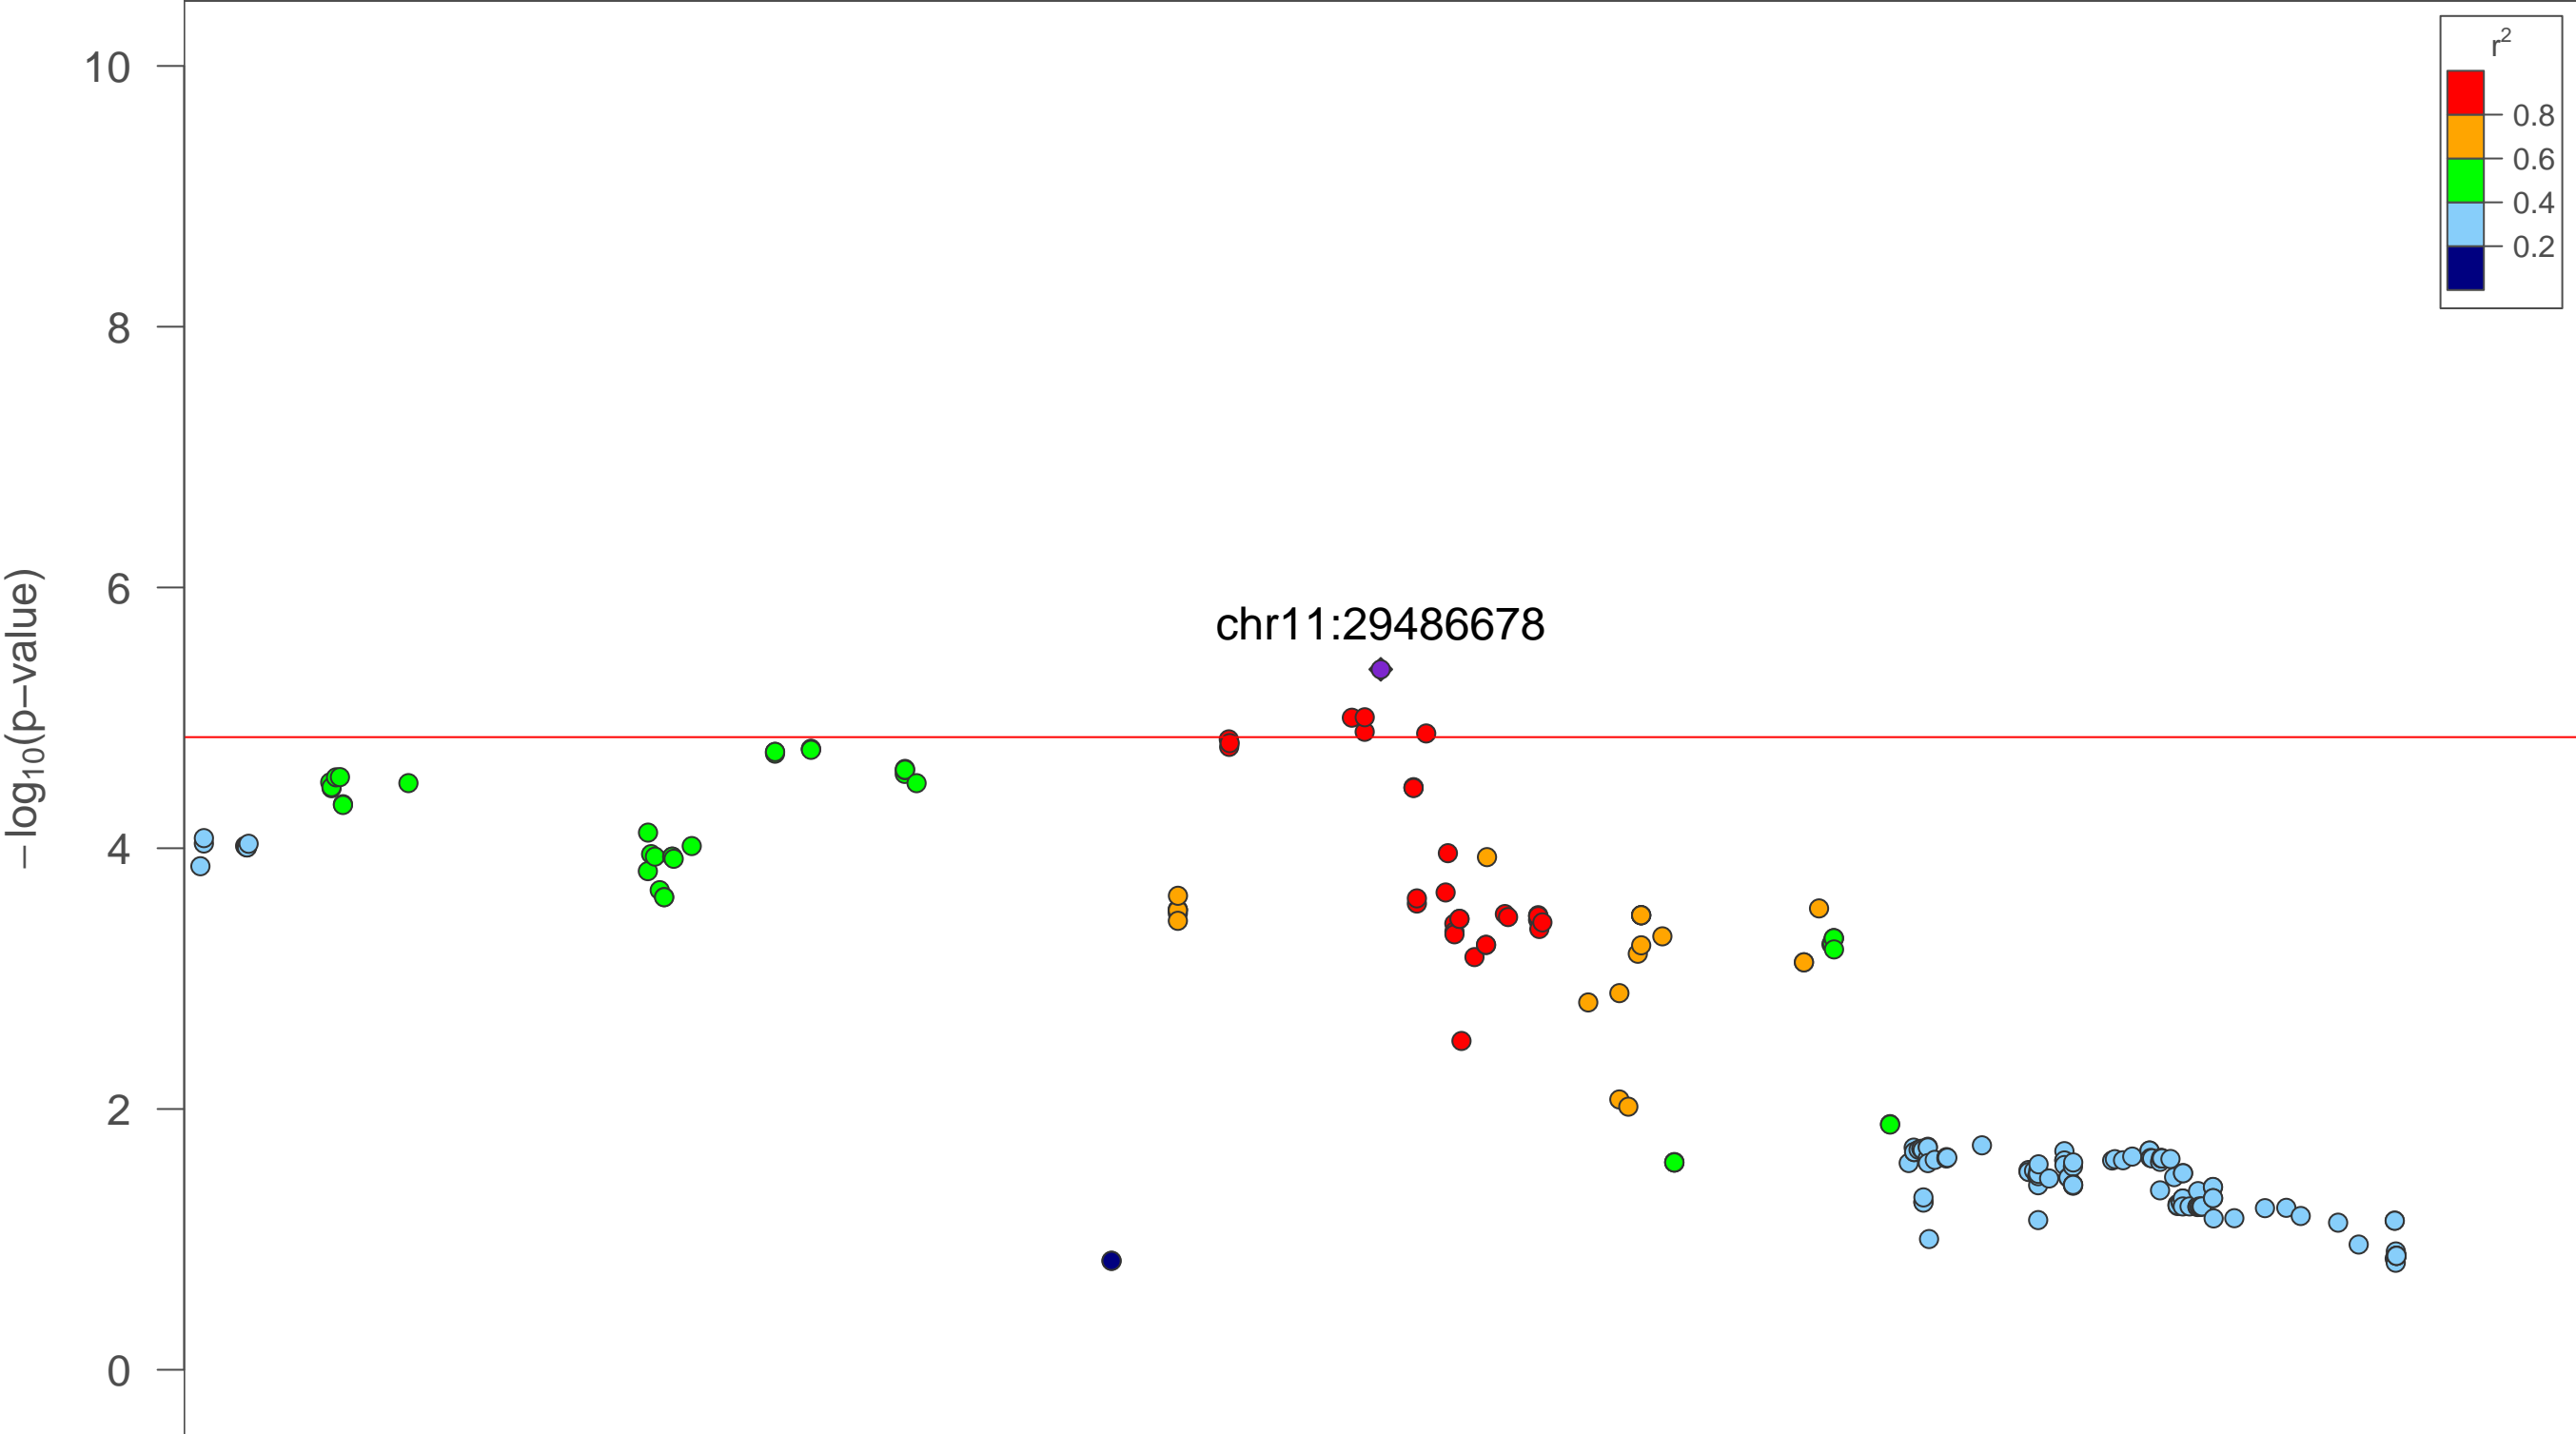

Credible Set

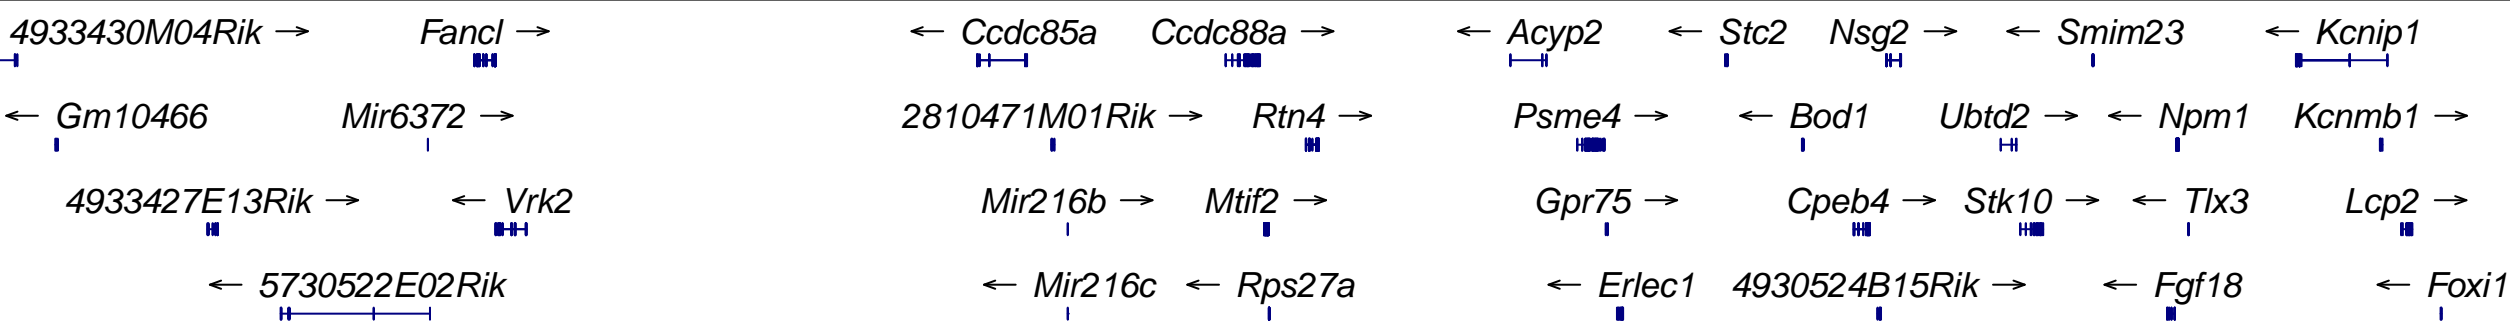

34 genes  
omitted

date: Thu Oct 25 17:19:56 2018  
build: F34GBS  
display range: chr11:24486678–34486678 [24486678–34486678]  
hilite range: 0 – 0 [ 0 – 0 ]  
reference SNP: chr11:29486678  
number of SNPs plotted: 208  
min P-value: 4.24E–6 [chr11:29486678]  
max P-value: 1.51E–1 [chr11:33727201]  
omitted Genes: Gm12070, Mir216a, Mir217  
omitted Genes: Efemp1, Pnpt1, Smek2  
omitted Genes: Cfap36, Prorsd1, Clhc1  
omitted Genes: Eml6, 4931440F15Rik, Sptbn1  
omitted Genes: 4930505A04Rik, Asb3, Chac2  
omitted Genes: D630024D03Rik, Gm12108, Il9r  
omitted Genes: Snrnp25, Rhbdf1, Mpg  
omitted Genes: Nprl3, Hba–x, Hba–a1  
omitted Genes: Hbq1b, Hba–a2, Hbq1a  
omitted Genes: Sh3pxd2b, Efcab9, Fbxw11  
omitted Genes: Ranbp17, Gabrp, Dock2  
omitted Genes: Fam196b

## Fine-mapping Regions

| snp            | chr | pos (Mb) | pp          | group        | color  |
|----------------|-----|----------|-------------|--------------|--------|
| chr11:28851860 | 11  | 28.85186 | 0.073389453 | Credible Set | purple |
| chr11:28853308 | 11  | 28.85331 | 0.064643672 | Credible Set | purple |
| chr11:28855496 | 11  | 28.85550 | 0.068857619 | Credible Set | purple |
| chr11:29365866 | 11  | 29.36587 | 0.105679620 | Credible Set | purple |
| chr11:29419484 | 11  | 29.41948 | 0.083318030 | Credible Set | purple |
| chr11:29419643 | 11  | 29.41964 | 0.106499999 | Credible Set | purple |
| chr11:29486678 | 11  | 29.48668 | 0.239200283 | Credible Set | purple |
| chr11:29623528 | 11  | 29.62353 | 0.032853206 | Credible Set | purple |
| chr11:29623531 | 11  | 29.62353 | 0.032494083 | Credible Set | purple |
| chr11:29623542 | 11  | 29.62354 | 0.032408279 | Credible Set | purple |
| chr11:29637584 | 11  | 29.63758 | 0.004718717 | Credible Set | purple |
| chr11:29637586 | 11  | 29.63759 | 0.005140145 | Credible Set | purple |
| chr11:29676398 | 11  | 29.67640 | 0.081041441 | Credible Set | purple |
| chr11:29757518 | 11  | 29.75752 | 0.005669447 | Credible Set | purple |
| chr11:29767130 | 11  | 29.76713 | 0.010892164 | Credible Set | purple |
| chr11:29794101 | 11  | 29.79410 | 0.003385191 | Credible Set | purple |
| chr11:29794488 | 11  | 29.79449 | 0.002970763 | Credible Set | purple |
| chr11:29794516 | 11  | 29.79452 | 0.002838729 | Credible Set | purple |
| chr11:29815423 | 11  | 29.81542 | 0.003663428 | Credible Set | purple |
| chr11:29815516 | 11  | 29.81552 | 0.003663428 | Credible Set | purple |
| chr11:30005177 | 11  | 30.00518 | 0.003967363 | Credible Set | purple |
| chr11:30018452 | 11  | 30.01845 | 0.003773369 | Credible Set | purple |
| chr11:30143941 | 11  | 30.14394 | 0.003605437 | Credible Set | purple |
| chr11:30144319 | 11  | 30.14432 | 0.003893775 | Credible Set | purple |
| chr11:30144348 | 11  | 30.14435 | 0.003827763 | Credible Set | purple |
| chr11:30144383 | 11  | 30.14438 | 0.003831083 | Credible Set | purple |
| chr11:30149181 | 11  | 30.14918 | 0.003098802 | Credible Set | purple |
| chr11:30161875 | 11  | 30.16187 | 0.003455055 | Credible Set | purple |

F34 GBS, extensor digitorum longus muscle weight (mg)

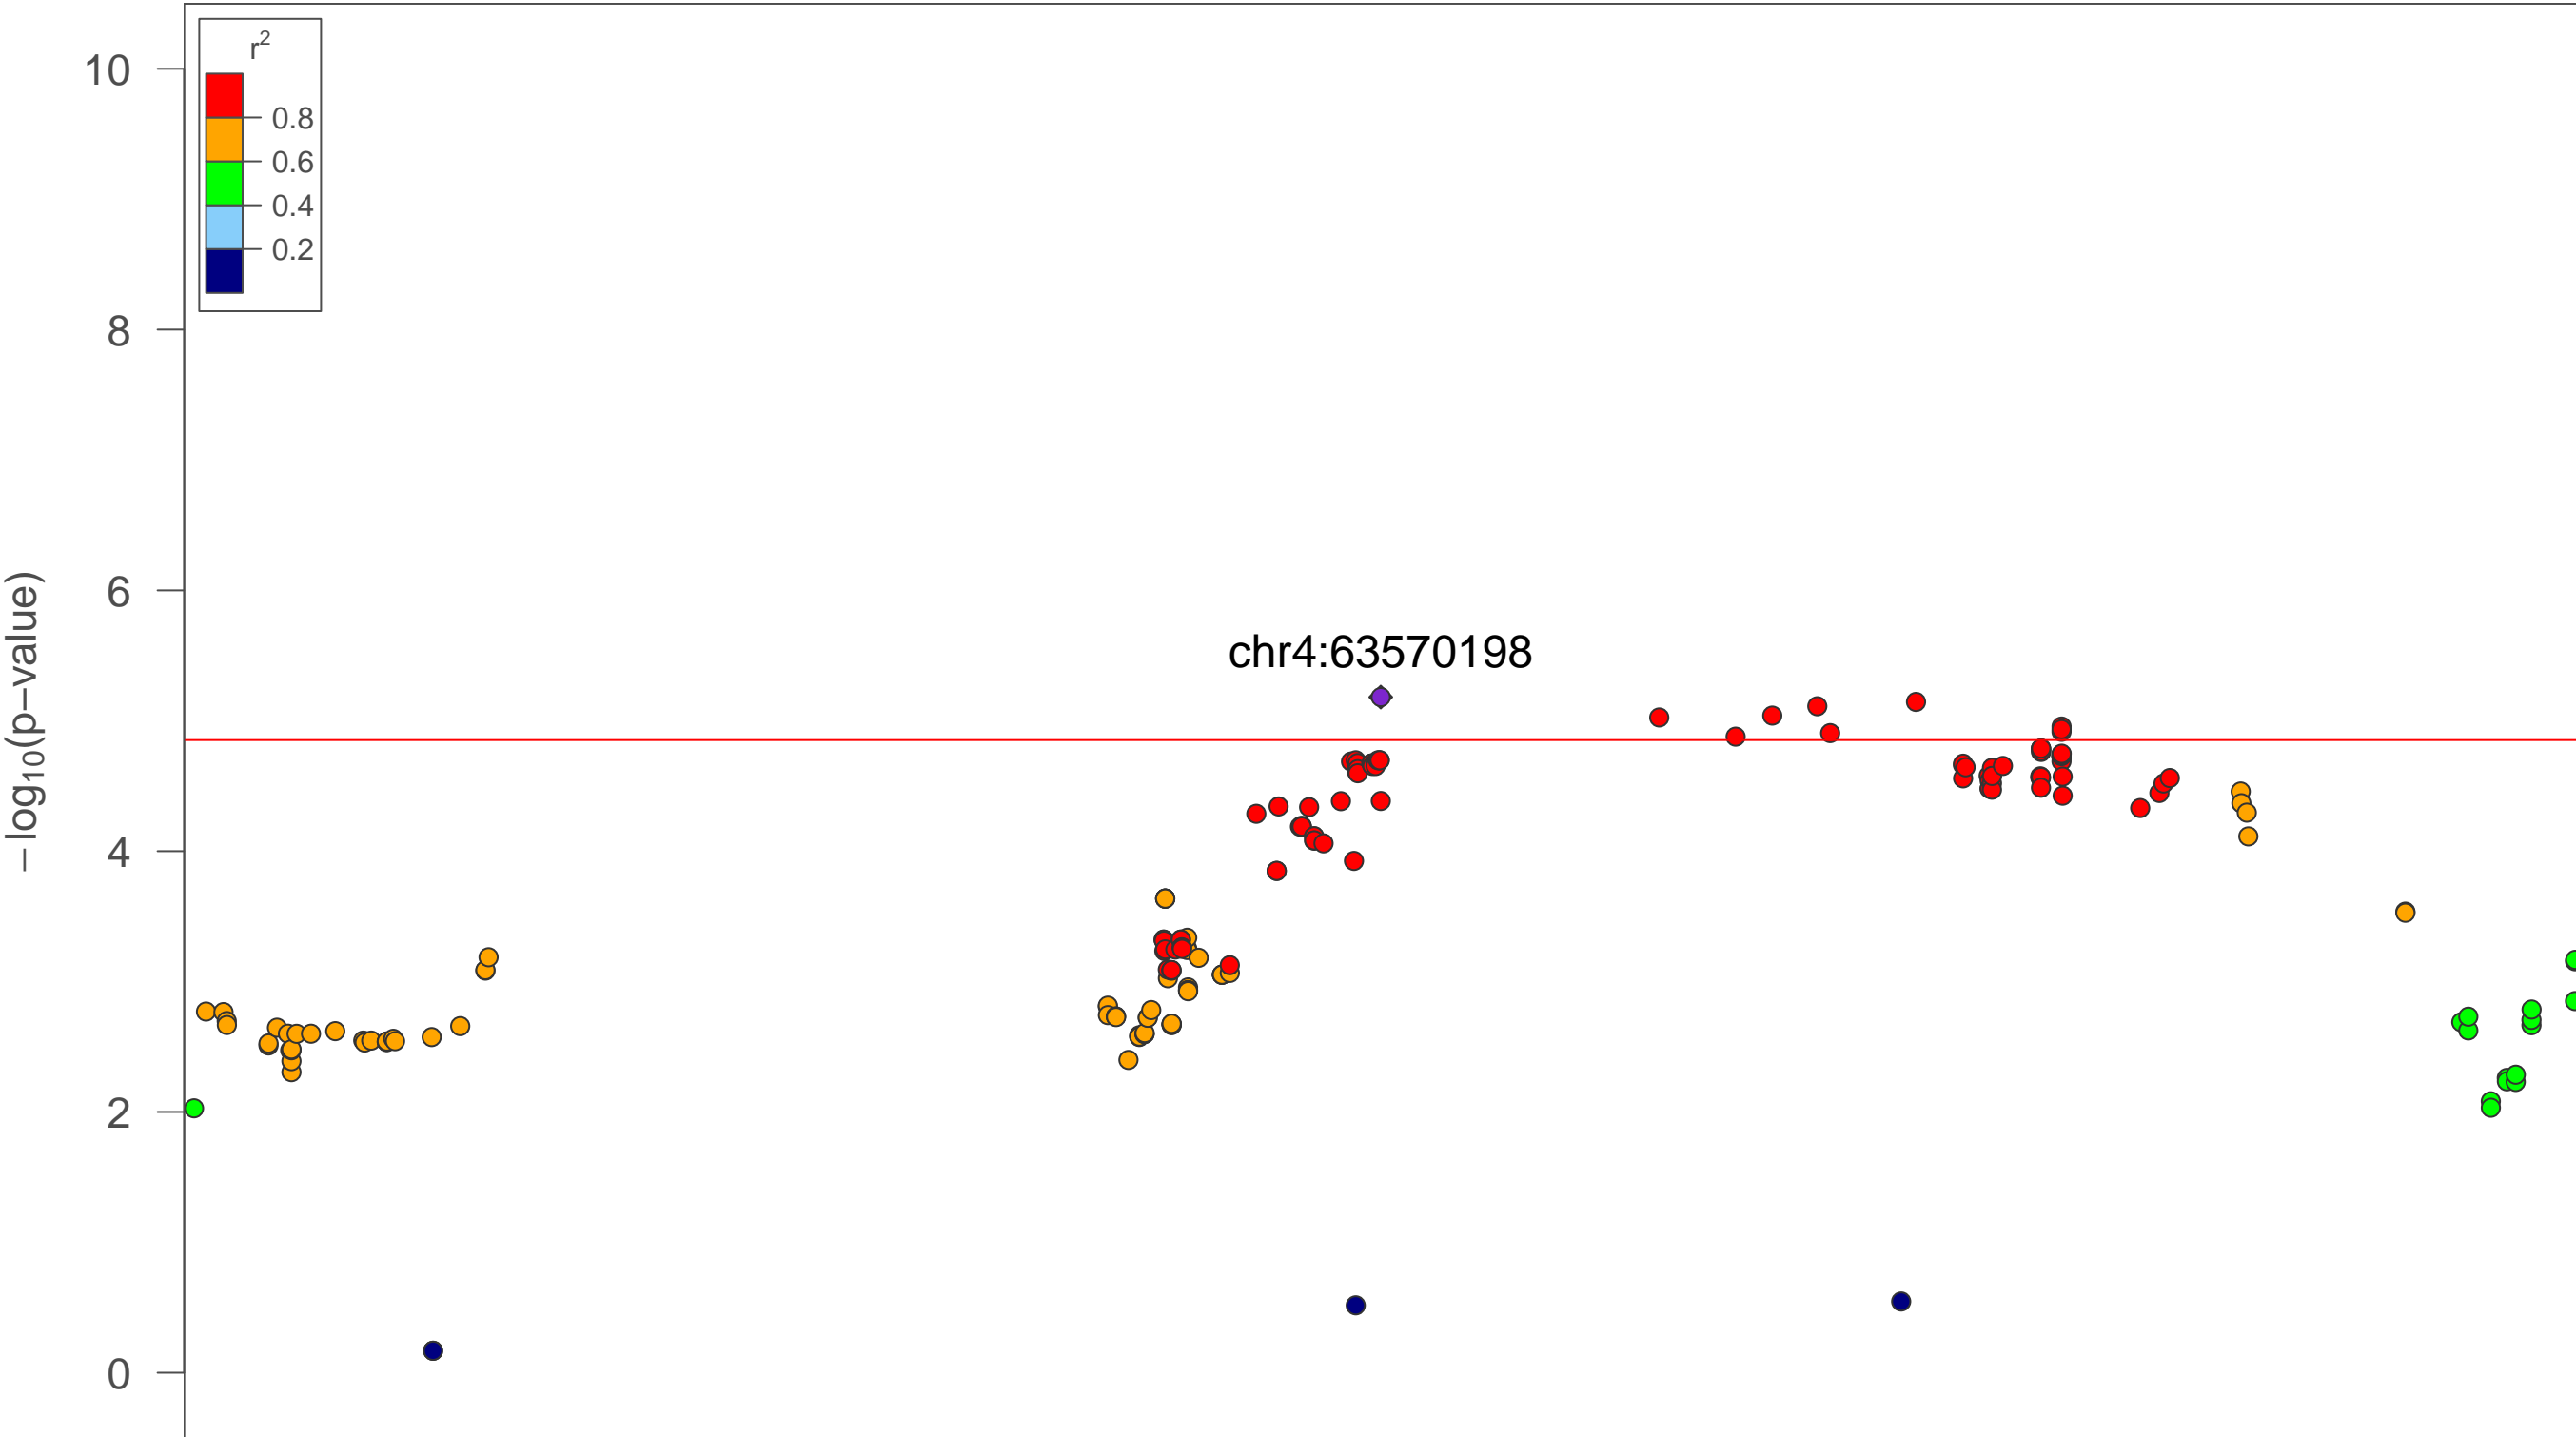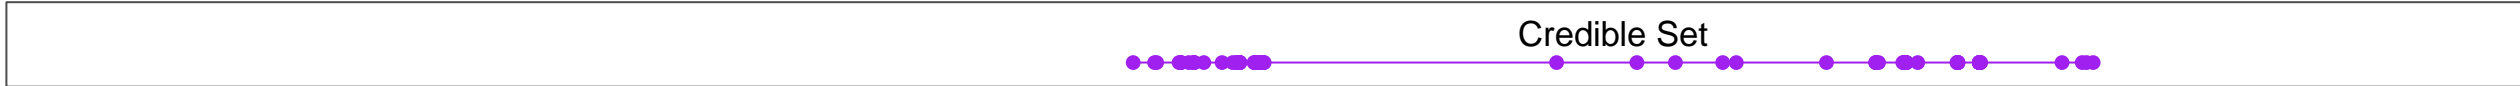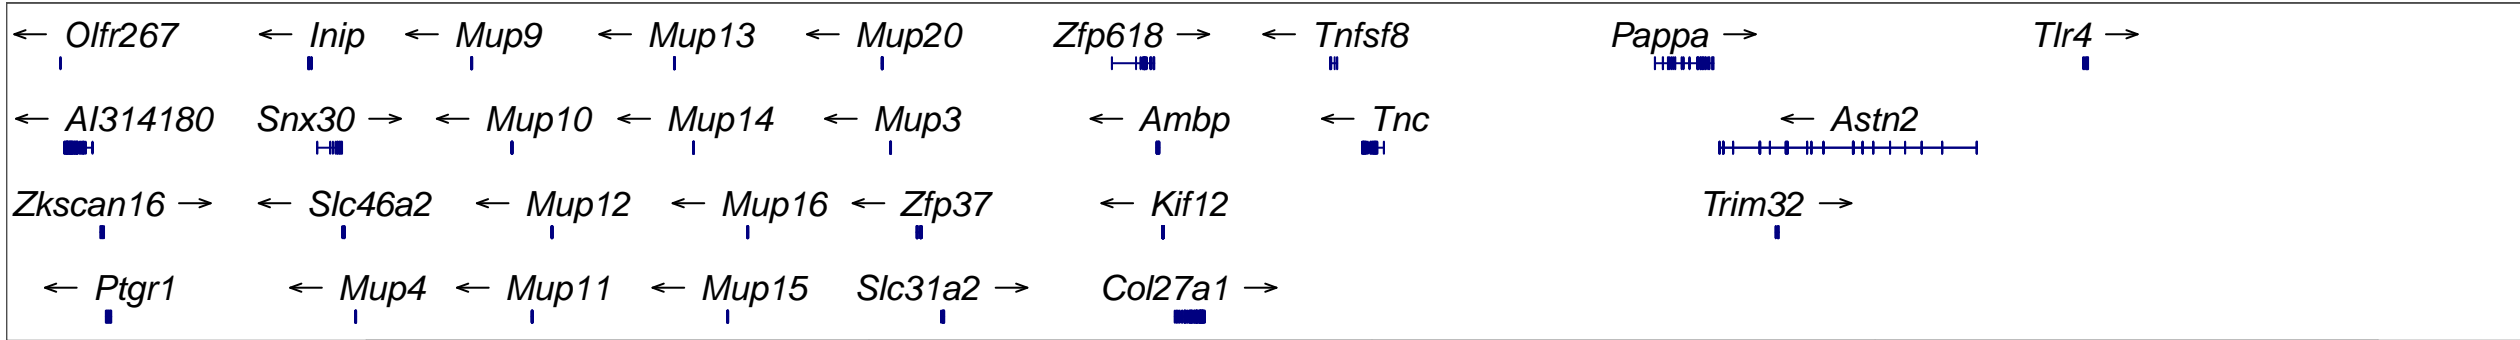

41 genes  
omitted

date: Thu Oct 25 17:20:05 2018  
build: F34GBS  
display range: chr4:58570198–68570198 [58570198–68570198]  
hilite range: 0 – 0 [ 0 – 0 ]  
reference SNP: chr4:63570198  
number of SNPs plotted: 192  
min P-value: 6.58E–6 [chr4:63570198]  
max P-value: 6.78E–1 [chr4:59610662]  
omitted Genes: Dnajc25, Gng10, Ugcg  
omitted Genes: Gm12596, Susd1, Ptbp3  
omitted Genes: Hsdl2, E130308A19Rik, Mup6  
omitted Genes: Mup7, Mup2, Mup8  
omitted Genes: Mup1, Mup17, Mup18  
omitted Genes: Mup19, Mup5, Mup21  
omitted Genes: Fkbp15, Slc31a1, Cdc26  
omitted Genes: Prpf4, Rnf183, Wdr31  
omitted Genes: Bspry, Hdhd3, Alad  
omitted Genes: Pole3, 4933430I17Rik, Rgs3  
omitted Genes: Mir455, Orm1, Orm3  
omitted Genes: Orm2, Akna, Whrn  
omitted Genes: Atp6v1g1, 6330416G13Rik, Gm11213  
omitted Genes: 1700018C11Rik, Tnfsf15

## Fine-mapping Regions

| snp           | chr | pos (Mb) | pp          | group        | color  |
|---------------|-----|----------|-------------|--------------|--------|
| chr4:63050153 | 4   | 63.05015 | 0.005586469 | Credible Set | purple |
| chr4:63135285 | 4   | 63.13529 | 0.002155219 | Credible Set | purple |
| chr4:63143387 | 4   | 63.14339 | 0.006319390 | Credible Set | purple |
| chr4:63232655 | 4   | 63.23266 | 0.004506028 | Credible Set | purple |
| chr4:63239449 | 4   | 63.23945 | 0.004569768 | Credible Set | purple |
| chr4:63239821 | 4   | 63.23982 | 0.004525341 | Credible Set | purple |
| chr4:63239854 | 4   | 63.23985 | 0.004516917 | Credible Set | purple |
| chr4:63270812 | 4   | 63.27081 | 0.006242967 | Credible Set | purple |
| chr4:63291699 | 4   | 63.29170 | 0.003837657 | Credible Set | purple |
| chr4:63291735 | 4   | 63.29174 | 0.003837138 | Credible Set | purple |
| chr4:63292002 | 4   | 63.29200 | 0.003565385 | Credible Set | purple |
| chr4:63292021 | 4   | 63.29202 | 0.003582722 | Credible Set | purple |
| chr4:63331035 | 4   | 63.33103 | 0.003408827 | Credible Set | purple |
| chr4:63403594 | 4   | 63.40359 | 0.006898749 | Credible Set | purple |
| chr4:63445899 | 4   | 63.44590 | 0.013422221 | Credible Set | purple |
| chr4:63458203 | 4   | 63.45820 | 0.002543254 | Credible Set | purple |
| chr4:63465528 | 4   | 63.46553 | 0.013717511 | Credible Set | purple |
| chr4:63471028 | 4   | 63.47103 | 0.012115126 | Credible Set | purple |
| chr4:63471086 | 4   | 63.47109 | 0.011300514 | Credible Set | purple |
| chr4:63473150 | 4   | 63.47315 | 0.011770552 | Credible Set | purple |
| chr4:63473181 | 4   | 63.47318 | 0.011667117 | Credible Set | purple |
| chr4:63473231 | 4   | 63.47323 | 0.013077005 | Credible Set | purple |
| chr4:63473937 | 4   | 63.47394 | 0.011805191 | Credible Set | purple |
| chr4:63474009 | 4   | 63.47401 | 0.011026218 | Credible Set | purple |
| chr4:63531405 | 4   | 63.53140 | 0.012964723 | Credible Set | purple |
| chr4:63531436 | 4   | 63.53144 | 0.013007659 | Credible Set | purple |
| chr4:63535096 | 4   | 63.53510 | 0.012463435 | Credible Set | purple |
| chr4:63548238 | 4   | 63.54824 | 0.013125578 | Credible Set | purple |
| chr4:63548572 | 4   | 63.54857 | 0.012457840 | Credible Set | purple |
| chr4:63558825 | 4   | 63.55882 | 0.013715376 | Credible Set | purple |
| chr4:63565618 | 4   | 63.56562 | 0.013717511 | Credible Set | purple |
| chr4:63565712 | 4   | 63.56571 | 0.013717511 | Credible Set | purple |
| chr4:63570198 | 4   | 63.57020 | 0.039756613 | Credible Set | purple |
| chr4:63570284 | 4   | 63.57028 | 0.006920540 | Credible Set | purple |
| chr4:64733521 | 4   | 64.73352 | 0.028193873 | Credible Set | purple |
| chr4:65052703 | 4   | 65.05270 | 0.020407037 | Credible Set | purple |

## Fine-mapping Regions

| snp           | chr | pos (Mb) | pp          | group        | color  |
|---------------|-----|----------|-------------|--------------|--------|
| chr4:65205920 | 4   | 65.20592 | 0.029105020 | Credible Set | purple |
| chr4:65393970 | 4   | 65.39397 | 0.034087638 | Credible Set | purple |
| chr4:65447841 | 4   | 65.44784 | 0.021665351 | Credible Set | purple |
| chr4:65806420 | 4   | 65.80642 | 0.036665107 | Credible Set | purple |
| chr4:66002530 | 4   | 66.00253 | 0.012677452 | Credible Set | purple |
| chr4:66003029 | 4   | 66.00303 | 0.010115198 | Credible Set | purple |
| chr4:66003164 | 4   | 66.00316 | 0.012951976 | Credible Set | purple |
| chr4:66013512 | 4   | 66.01351 | 0.012199736 | Credible Set | purple |
| chr4:66110072 | 4   | 66.11007 | 0.010583302 | Credible Set | purple |
| chr4:66114163 | 4   | 66.11416 | 0.009706855 | Credible Set | purple |
| chr4:66114164 | 4   | 66.11416 | 0.008517105 | Credible Set | purple |
| chr4:66114176 | 4   | 66.11418 | 0.008502830 | Credible Set | purple |
| chr4:66123765 | 4   | 66.12377 | 0.009323297 | Credible Set | purple |
| chr4:66123768 | 4   | 66.12377 | 0.008359871 | Credible Set | purple |
| chr4:66123832 | 4   | 66.12383 | 0.012075522 | Credible Set | purple |
| chr4:66124242 | 4   | 66.12424 | 0.010537474 | Credible Set | purple |
| chr4:66169378 | 4   | 66.16938 | 0.012473269 | Credible Set | purple |
| chr4:66325857 | 4   | 66.32586 | 0.010470415 | Credible Set | purple |
| chr4:66325987 | 4   | 66.32599 | 0.010234159 | Credible Set | purple |
| chr4:66328189 | 4   | 66.32819 | 0.010171039 | Credible Set | purple |
| chr4:66328195 | 4   | 66.32819 | 0.010349660 | Credible Set | purple |
| chr4:66328436 | 4   | 66.32844 | 0.008640016 | Credible Set | purple |
| chr4:66328528 | 4   | 66.32853 | 0.016711908 | Credible Set | purple |
| chr4:66328560 | 4   | 66.32856 | 0.016651954 | Credible Set | purple |
| chr4:66329044 | 4   | 66.32904 | 0.015940153 | Credible Set | purple |
| chr4:66329065 | 4   | 66.32906 | 0.016703717 | Credible Set | purple |
| chr4:66414332 | 4   | 66.41433 | 0.014848635 | Credible Set | purple |
| chr4:66414345 | 4   | 66.41434 | 0.014937879 | Credible Set | purple |
| chr4:66414373 | 4   | 66.41437 | 0.014389080 | Credible Set | purple |
| chr4:66414374 | 4   | 66.41437 | 0.014462506 | Credible Set | purple |
| chr4:66414384 | 4   | 66.41438 | 0.013469720 | Credible Set | purple |
| chr4:66414387 | 4   | 66.41439 | 0.014718109 | Credible Set | purple |
| chr4:66414451 | 4   | 66.41445 | 0.015118442 | Credible Set | purple |
| chr4:66414476 | 4   | 66.41448 | 0.022146038 | Credible Set | purple |
| chr4:66414508 | 4   | 66.41451 | 0.024217351 | Credible Set | purple |
| chr4:66414513 | 4   | 66.41451 | 0.023099784 | Credible Set | purple |

Fine-mapping Regions

| snp           | chr | pos (Mb) | pp          | group        | color  |
|---------------|-----|----------|-------------|--------------|--------|
| chr4:66414963 | 4   | 66.41496 | 0.015322361 | Credible Set | purple |
| chr4:66419064 | 4   | 66.41906 | 0.007564370 | Credible Set | purple |
| chr4:66419126 | 4   | 66.41913 | 0.010420861 | Credible Set | purple |
| chr4:66743103 | 4   | 66.74310 | 0.006150139 | Credible Set | purple |
| chr4:66823255 | 4   | 66.82326 | 0.007915557 | Credible Set | purple |
| chr4:66840696 | 4   | 66.84070 | 0.009284521 | Credible Set | purple |
| chr4:66866758 | 4   | 66.86676 | 0.010175646 | Credible Set | purple |



F34 GBS, gastrocnemius muscle weight (mg)

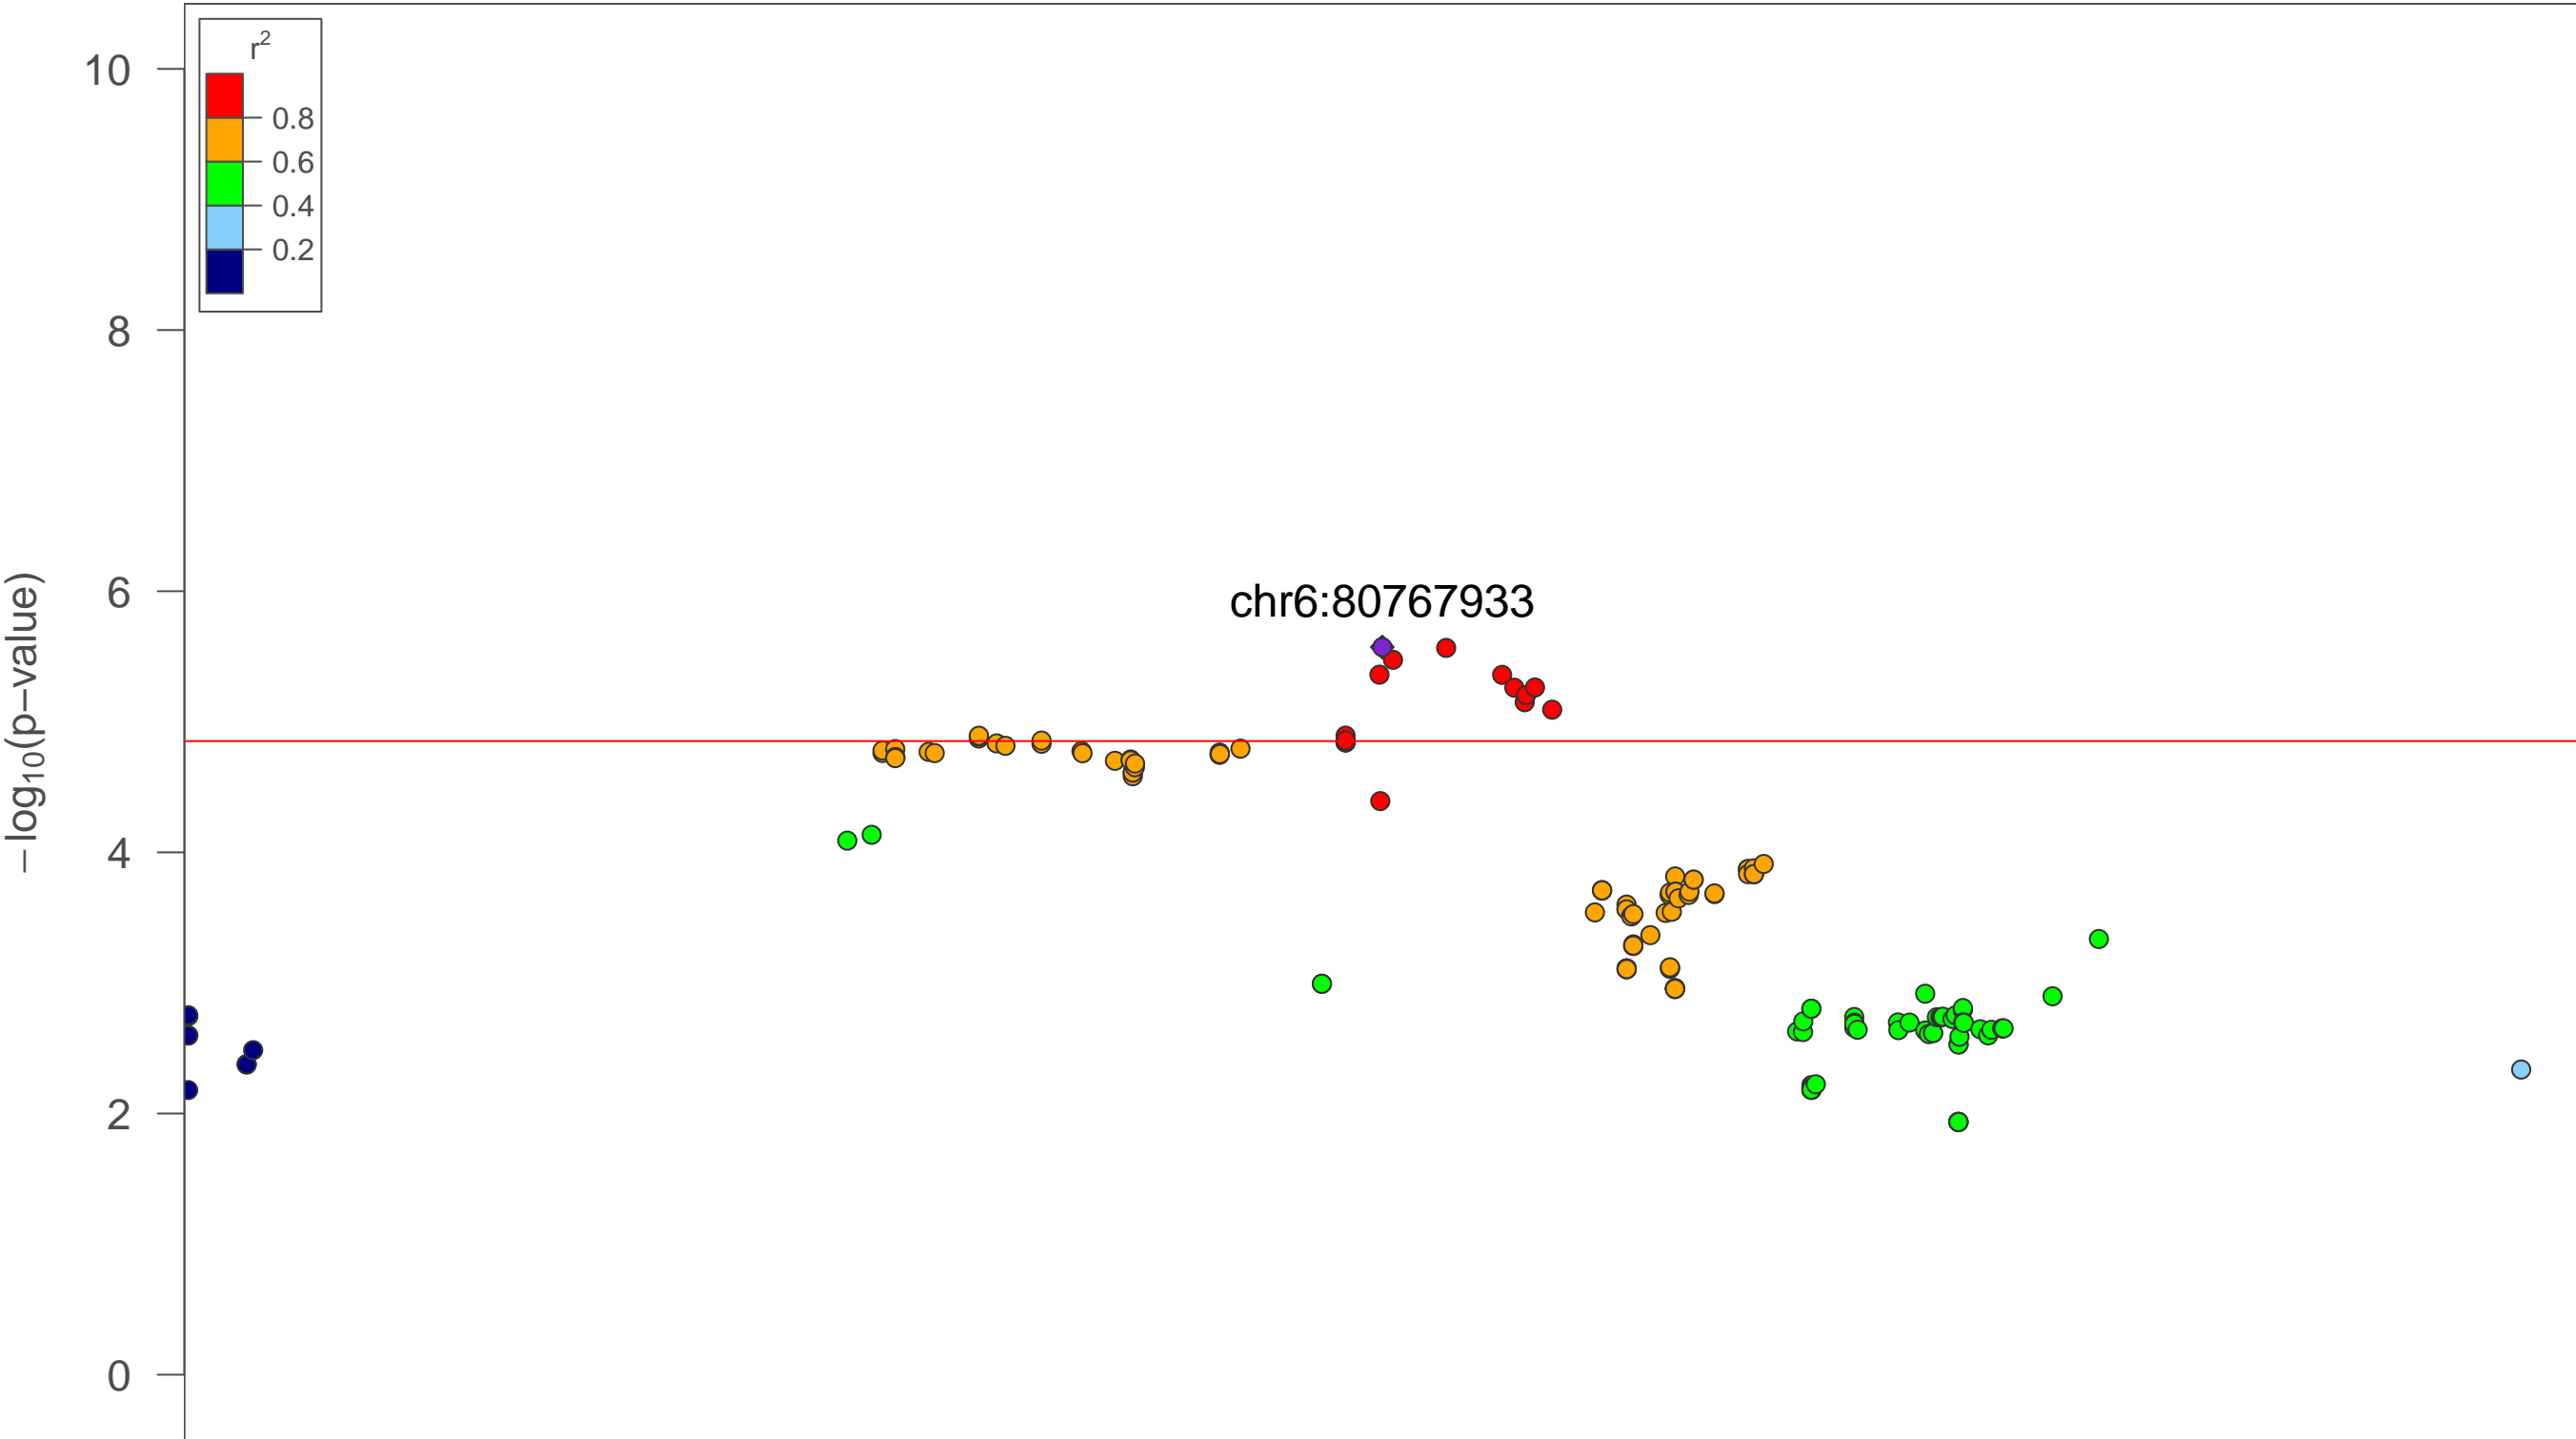

Credible Set

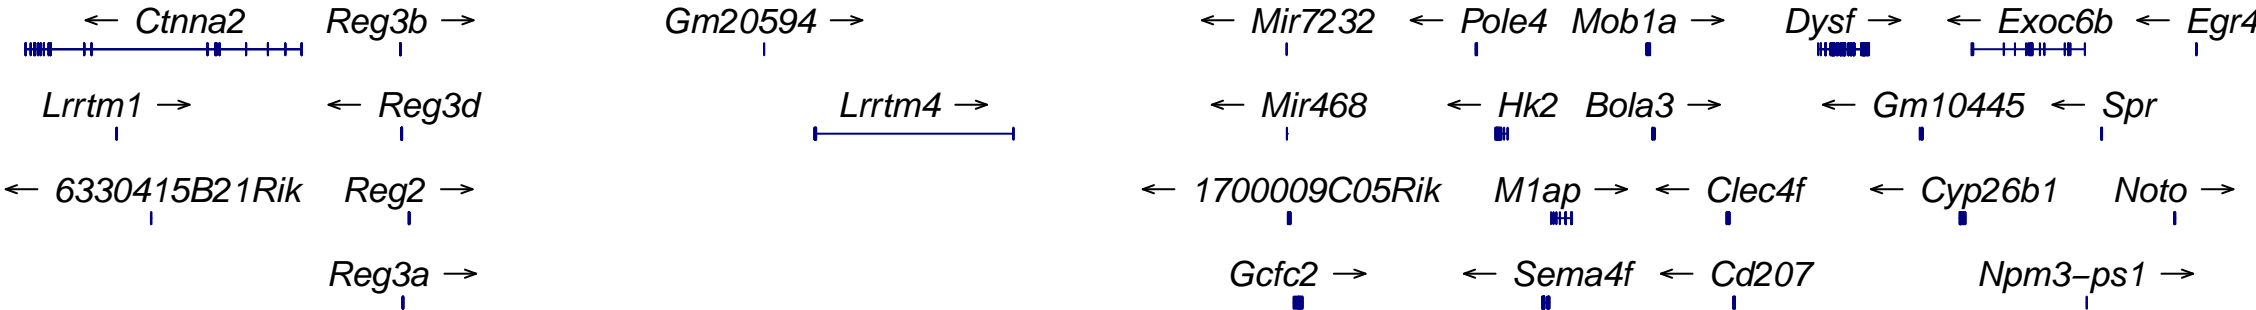

57 genes  
omitted

date: Thu Oct 25 17:20:16 2018  
build: F34GBS  
display range: chr6:75767933–85767933 [75767933–85767933]  
hilite range: 0 – 0 [ 0 – 0 ]  
reference SNP: chr6:80767933  
number of SNPs plotted: 156  
min P-value: 2.68E–6 [chr6:80767933]  
max P-value: 1.16E–2 [chr6:83172373]  
omitted Genes: Reg1, Reg3g, Gm20362  
omitted Genes: Mrpl19, Eva1a, Tacr1  
omitted Genes: 2310069B03Rik, Dok1, Loxl3  
omitted Genes: Mir7040, Htra2, Aup1  
omitted Genes: Dqx1, Tlx2, Pcgf1  
omitted Genes: Lbx2, Mir3470a, Ccdc142  
omitted Genes: Mrpl53, Mogs, Wbp1  
omitted Genes: Ino80b, Rtkn, Wdr54  
omitted Genes: 1700003E16Rik, Dctn1, Slc4a5  
omitted Genes: Mthfd2, Tet3, Mir6374  
omitted Genes: B230319C09Rik, Dguok, Actg2  
omitted Genes: Stambp, Gm21284, Vax2os  
omitted Genes: Vax2, Atp6v1b1, 1700124L16Rik  
omitted Genes: Ankrd53, Tex261, Gm7443  
omitted Genes: Nagk, Paip2b, Zfp638  
omitted Genes: Gm5878, Emx1, Sfxn5  
omitted Genes: Rab11fip5, Mir705, Smyd5  
omitted Genes: Pradc1, Cct7, Fbxo41  
omitted Genes: Alms1, Nat8f7, Nat8f3

Fine-mapping Regions

| snp           | chr | pos (Mb) | pp         | group        | color  |
|---------------|-----|----------|------------|--------------|--------|
| chr6:80614710 | 6   | 80.61471 | 0.03055088 | Credible Set | purple |
| chr6:80614725 | 6   | 80.61473 | 0.02725666 | Credible Set | purple |
| chr6:80614740 | 6   | 80.61474 | 0.02732058 | Credible Set | purple |
| chr6:80614750 | 6   | 80.61475 | 0.02725666 | Credible Set | purple |
| chr6:80614907 | 6   | 80.61491 | 0.02820462 | Credible Set | purple |
| chr6:80755939 | 6   | 80.75594 | 0.08540020 | Credible Set | purple |
| chr6:80759589 | 6   | 80.75959 | 0.01017886 | Credible Set | purple |
| chr6:80767933 | 6   | 80.76793 | 0.13610015 | Credible Set | purple |
| chr6:80812582 | 6   | 80.81258 | 0.10974954 | Credible Set | purple |
| chr6:81034488 | 6   | 81.03449 | 0.13422460 | Credible Set | purple |
| chr6:81267890 | 6   | 81.26789 | 0.08512251 | Credible Set | purple |
| chr6:81318989 | 6   | 81.31899 | 0.06852202 | Credible Set | purple |
| chr6:81362217 | 6   | 81.36222 | 0.05361753 | Credible Set | purple |
| chr6:81368112 | 6   | 81.36811 | 0.06044366 | Credible Set | purple |
| chr6:81405109 | 6   | 81.40511 | 0.06876887 | Credible Set | purple |
| chr6:81476902 | 6   | 81.47690 | 0.04728265 | Credible Set | purple |

F34 GBS, soleus muscle weight (mg)

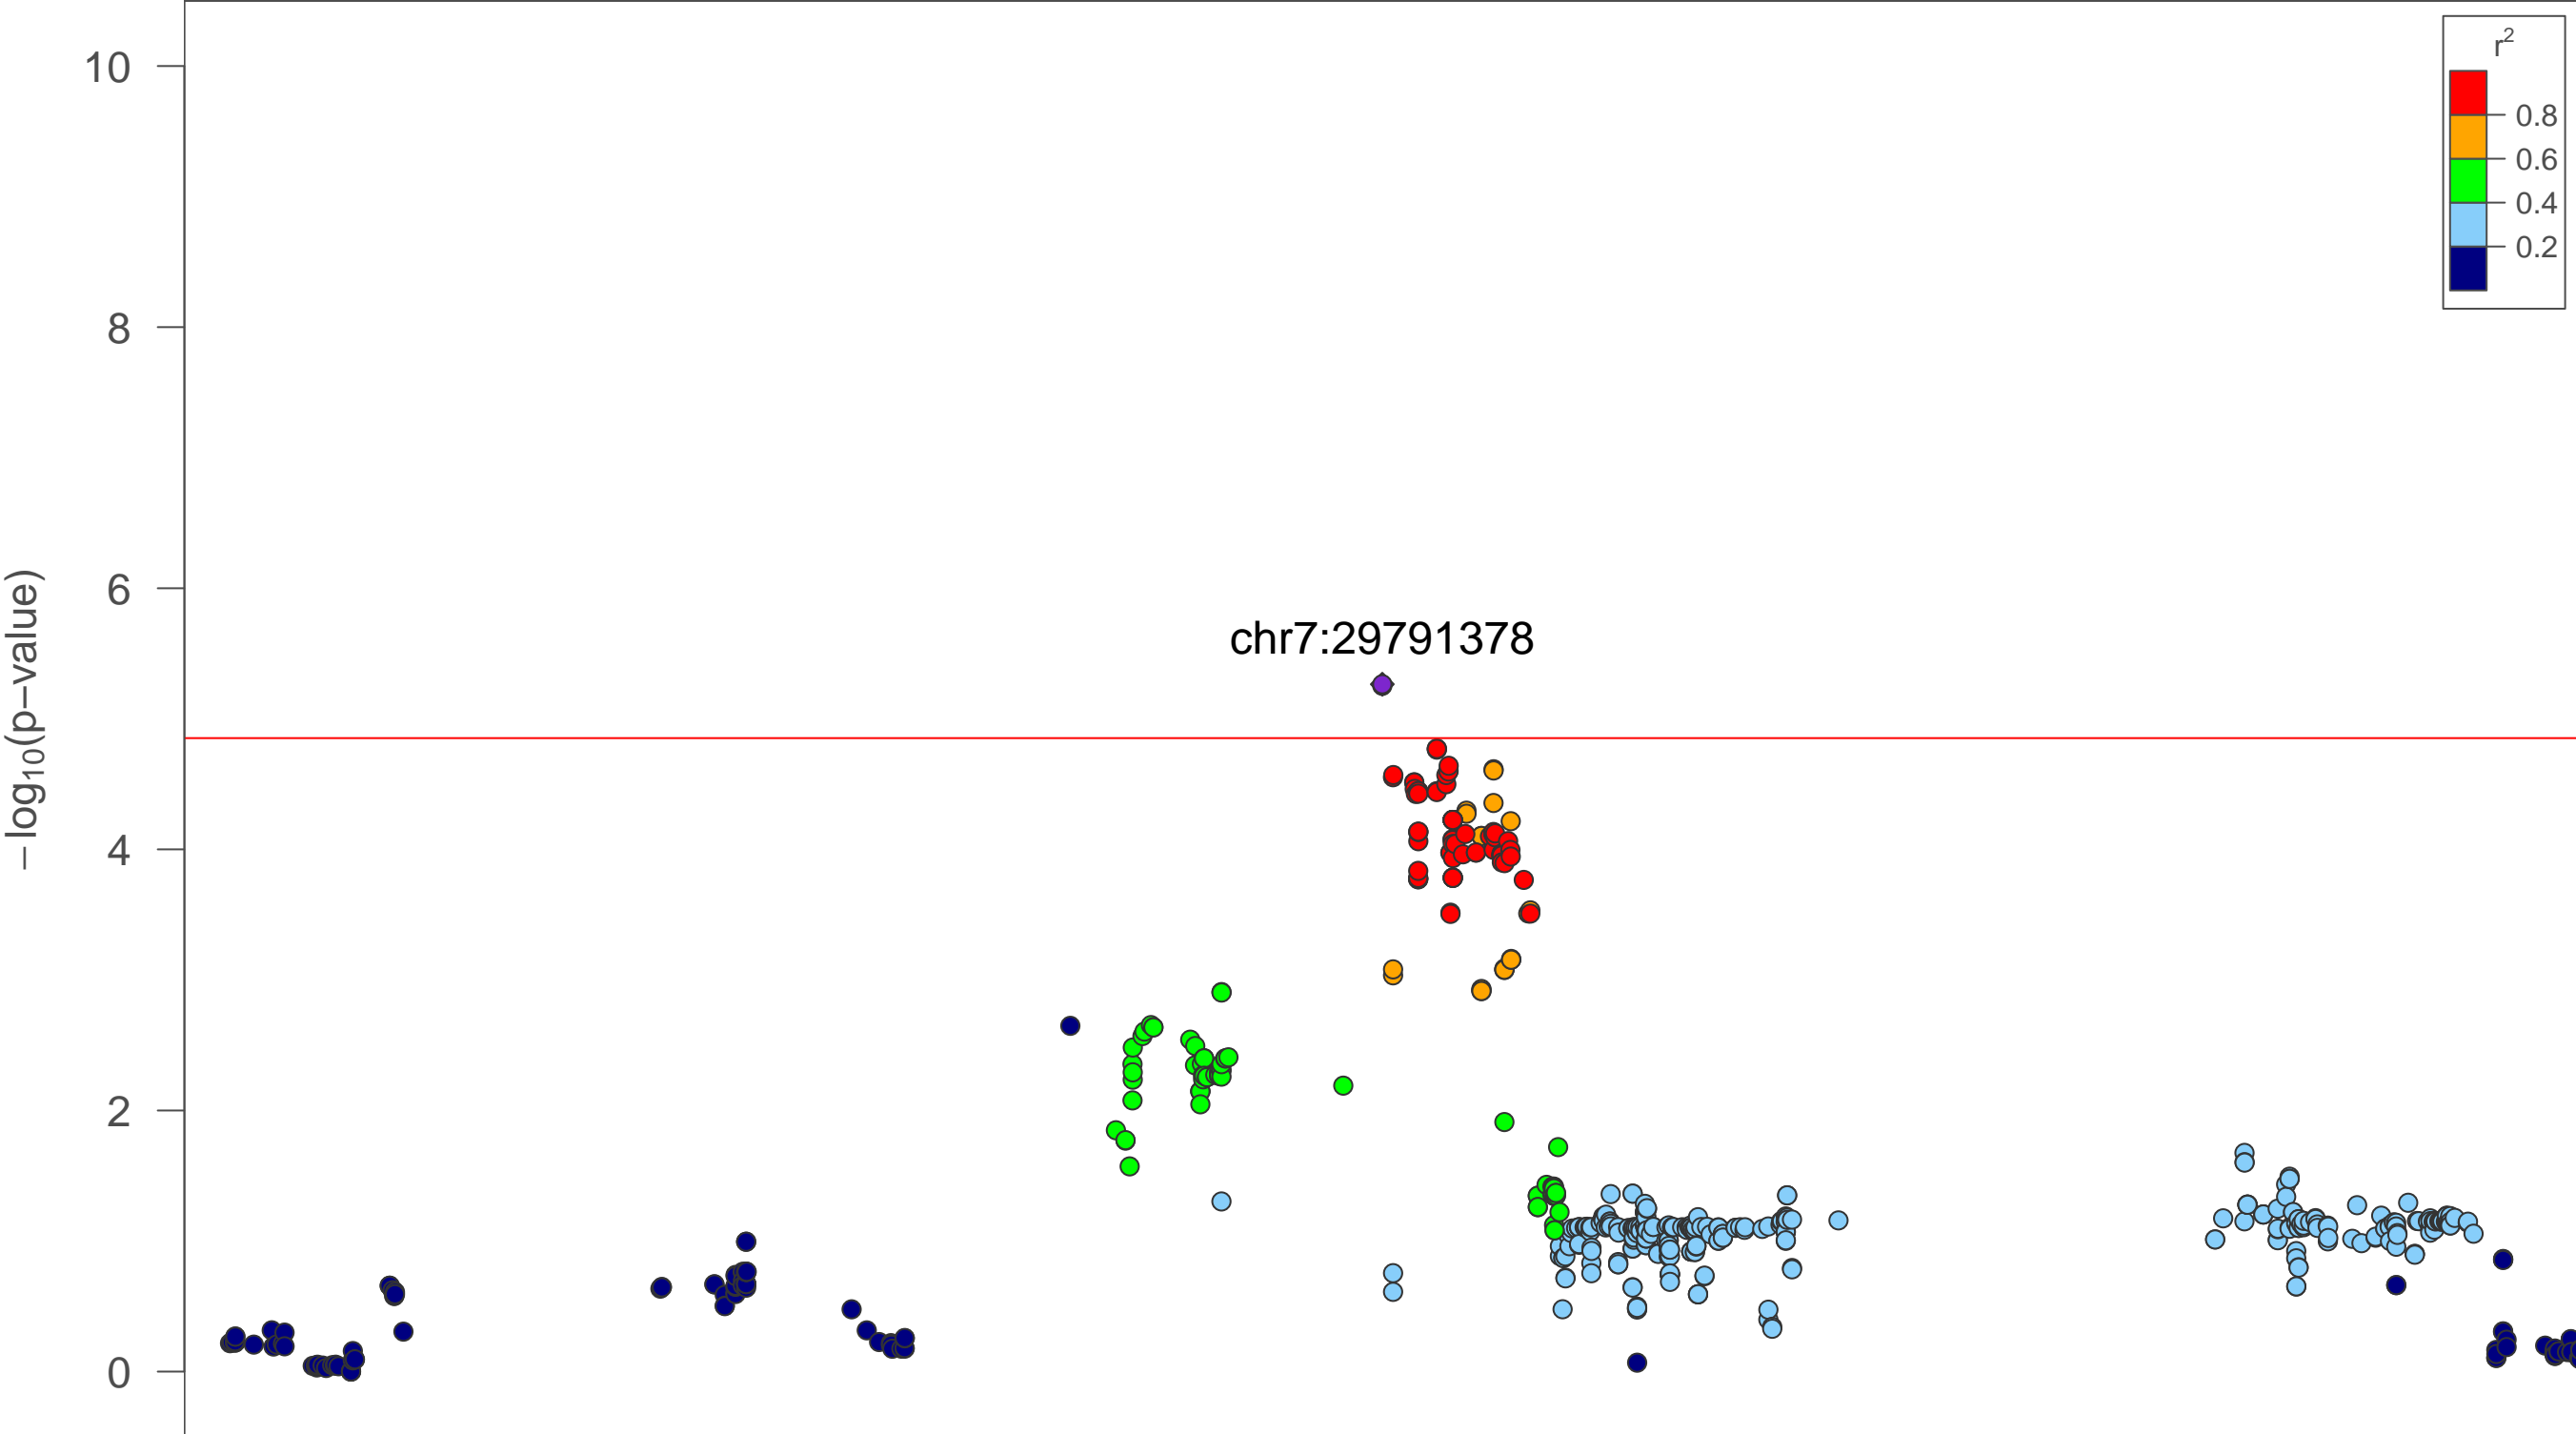

Credible Set

Gm5893 → Cyp2b13 → Cyp2a12 → Zfp59 → ← Ifnl2 ← Spred3 ← Zfp27 ← Lin37 Scgb2b2 → ← Scgb2b11 ← Scgb2b18 ← Wtip  
← Lypd4 ← Axl ← Nlrp9c Cyp2f2 → Zfp607 → Ifnl3 → Ggn → Zfp84 → ← Hcst ← Lsr ← Scgb2b7 ← Scgb2b15 ← Scgb2b26  
Dmrtc2 → Cyp2b9 → Cyp2t4 → ← Zfp780b Sars2 → ← Catsperg2 Hspb6 → ← Scgb2b3 ← Scgb2b12 ← Scgb2b19 ← Uba2  
Rps19 → Cyp2b10 → Cyp2g1 → Prx → Fcgbp → Sirt2 → Mir1964 → ← Psenen Scgb1b3 → Scgb1b12 → Scgb1b19 → ← Pdcd2l

222 genes  
omitted

Position on chr7 (Mb)

date: Thu Oct 25 17:20:27 2018

build: F34GBS

display range: chr7:24791378–34791378 [24791378–34791378]

hilite range: 0 – 0 [ 0 – 0 ]

reference SNP: chr7:29791378

number of SNPs plotted: 603

min P-value: 5.43E–6 [chr7:29791378]

max P-value: 9.98E–1 [chr7:25487376]

omitted Genes: Cd79a, Arhgef1, Rabac1

omitted Genes: Mir7046, Atp1a3, Mir7047

omitted Genes: Grik5, Zfp574, Pou2f2

omitted Genes: Mir6537, D930028M14Rik, Dedd2

omitted Genes: Mir7048, Zfp526, Gsk3a

omitted Genes: 9130221H12Rik, Erf, Cic

omitted Genes: Pafah1b3, Prr19, Tmem145

omitted Genes: Megf8, Cnfn, 4732471J01Rik

omitted Genes: Lipe, Cxcl17, Ceacam1

omitted Genes: Ceacam2, Erich4, Atp5sl

omitted Genes: B3gnt8, Bckdha, Exosc5

omitted Genes: Tmem91, B9d2, Tgfb1

omitted Genes: Ccdc97, Hnrnpul1, Cyp2s1

omitted Genes: Vmn1r184, Cyp2a4, Nlrp4a

omitted Genes: Nlrp9a, Vmn1r185, Cyp2b23

omitted Genes: Cyp2b19, Cyp2a5, Cyp2a22

omitted Genes: Egln2, Rab4b, Mir3101

omitted Genes: Mia, Snrpa, BC024978

omitted Genes: Mir1191, Itpkc, Adck4

omitted Genes: Numbl, Ltbp4, Shkbp1

omitted Genes: Sptbn4, Blvrb, Sertad3

omitted Genes: Sertad1, Hipk4, Pld3

omitted Genes: 2310022A10Rik, Akt2, Ttc9b

omitted Genes: Map3k10, C030039L03Rik, Zfp60

omitted Genes: Gm10046, Zfp626, 1700049G17Rik

omitted Genes: Zfp850, Psmc4, 9530053A07Rik

omitted Genes: Fbl, Dyrk1b, Eid2

omitted Genes: Eid2b, BC089491, Dll3

omitted Genes: Timm50, Supt5, Rps16

omitted Genes: AF357399, Plekhg2, Zfp36

omitted Genes: Med29, Paf1, Samd4b

omitted Genes: Gmfa, Lrfr1, 1700028B04Rik

Make more plots at <http://csg.sph.umich.edu/locuszoom/>

## Fine-mapping Regions

| snp           | chr | pos (Mb) | pp          | group        | color  |
|---------------|-----|----------|-------------|--------------|--------|
| chr7:29791322 | 7   | 29.79132 | 0.098275664 | Credible Set | purple |
| chr7:29791378 | 7   | 29.79138 | 0.100896825 | Credible Set | purple |
| chr7:29835954 | 7   | 29.83595 | 0.021094227 | Credible Set | purple |
| chr7:29837224 | 7   | 29.83722 | 0.021897496 | Credible Set | purple |
| chr7:29924583 | 7   | 29.92458 | 0.019392260 | Credible Set | purple |
| chr7:29924600 | 7   | 29.92460 | 0.019302108 | Credible Set | purple |
| chr7:29926689 | 7   | 29.92669 | 0.017338965 | Credible Set | purple |
| chr7:29931632 | 7   | 29.93163 | 0.015945916 | Credible Set | purple |
| chr7:29941228 | 7   | 29.94123 | 0.003838486 | Credible Set | purple |
| chr7:29941252 | 7   | 29.94125 | 0.003855683 | Credible Set | purple |
| chr7:29941259 | 7   | 29.94126 | 0.003905284 | Credible Set | purple |
| chr7:29941272 | 7   | 29.94127 | 0.003932245 | Credible Set | purple |
| chr7:29941287 | 7   | 29.94129 | 0.004422145 | Credible Set | purple |
| chr7:29941313 | 7   | 29.94131 | 0.016699891 | Credible Set | purple |
| chr7:29941361 | 7   | 29.94136 | 0.016476051 | Credible Set | purple |
| chr7:29941644 | 7   | 29.94164 | 0.016701635 | Credible Set | purple |
| chr7:29941657 | 7   | 29.94166 | 0.016024127 | Credible Set | purple |
| chr7:29941708 | 7   | 29.94171 | 0.008449947 | Credible Set | purple |
| chr7:29941716 | 7   | 29.94172 | 0.007239586 | Credible Set | purple |
| chr7:29941717 | 7   | 29.94172 | 0.008441506 | Credible Set | purple |
| chr7:29941765 | 7   | 29.94177 | 0.008502193 | Credible Set | purple |
| chr7:30018478 | 7   | 30.01848 | 0.016709972 | Credible Set | purple |
| chr7:30018532 | 7   | 30.01853 | 0.016455486 | Credible Set | purple |
| chr7:30018938 | 7   | 30.01894 | 0.034193123 | Credible Set | purple |
| chr7:30018947 | 7   | 30.01895 | 0.033532453 | Credible Set | purple |
| chr7:30018955 | 7   | 30.01895 | 0.033964231 | Credible Set | purple |
| chr7:30058592 | 7   | 30.05859 | 0.018773627 | Credible Set | purple |
| chr7:30058599 | 7   | 30.05860 | 0.021892512 | Credible Set | purple |
| chr7:30067674 | 7   | 30.06767 | 0.023566323 | Credible Set | purple |
| chr7:30067701 | 7   | 30.06770 | 0.023247881 | Credible Set | purple |
| chr7:30068385 | 7   | 30.06838 | 0.025573745 | Credible Set | purple |
| chr7:30075552 | 7   | 30.07555 | 0.005983281 | Credible Set | purple |
| chr7:30075596 | 7   | 30.07560 | 0.005980927 | Credible Set | purple |
| chr7:30084581 | 7   | 30.08458 | 0.007492523 | Credible Set | purple |
| chr7:30084617 | 7   | 30.08462 | 0.007377294 | Credible Set | purple |
| chr7:30085368 | 7   | 30.08537 | 0.010325017 | Credible Set | purple |

## Fine-mapping Regions

| snp           | chr | pos (Mb) | pp          | group        | color  |
|---------------|-----|----------|-------------|--------------|--------|
| chr7:30085376 | 7   | 30.08538 | 0.010325017 | Credible Set | purple |
| chr7:30085378 | 7   | 30.08538 | 0.010325017 | Credible Set | purple |
| chr7:30085382 | 7   | 30.08538 | 0.010325017 | Credible Set | purple |
| chr7:30085386 | 7   | 30.08539 | 0.010325017 | Credible Set | purple |
| chr7:30085398 | 7   | 30.08540 | 0.010325017 | Credible Set | purple |
| chr7:30085403 | 7   | 30.08540 | 0.010325017 | Credible Set | purple |
| chr7:30085427 | 7   | 30.08543 | 0.010325017 | Credible Set | purple |
| chr7:30085431 | 7   | 30.08543 | 0.010325017 | Credible Set | purple |
| chr7:30085517 | 7   | 30.08552 | 0.003945093 | Credible Set | purple |
| chr7:30085526 | 7   | 30.08553 | 0.003945093 | Credible Set | purple |
| chr7:30085548 | 7   | 30.08555 | 0.003945093 | Credible Set | purple |
| chr7:30085558 | 7   | 30.08556 | 0.003945093 | Credible Set | purple |
| chr7:30085567 | 7   | 30.08557 | 0.003935726 | Credible Set | purple |
| chr7:30085636 | 7   | 30.08564 | 0.006910810 | Credible Set | purple |
| chr7:30086094 | 7   | 30.08609 | 0.005463718 | Credible Set | purple |
| chr7:30095828 | 7   | 30.09583 | 0.006909874 | Credible Set | purple |
| chr7:30127954 | 7   | 30.12795 | 0.005821576 | Credible Set | purple |
| chr7:30137791 | 7   | 30.13779 | 0.008168606 | Credible Set | purple |
| chr7:30182363 | 7   | 30.18236 | 0.005985035 | Credible Set | purple |
| chr7:30182366 | 7   | 30.18237 | 0.006001099 | Credible Set | purple |
| chr7:30240571 | 7   | 30.24057 | 0.007864599 | Credible Set | purple |
| chr7:30255201 | 7   | 30.25520 | 0.008194478 | Credible Set | purple |
| chr7:30255202 | 7   | 30.25520 | 0.008162407 | Credible Set | purple |
| chr7:30255242 | 7   | 30.25524 | 0.008443790 | Credible Set | purple |
| chr7:30256110 | 7   | 30.25611 | 0.006266192 | Credible Set | purple |
| chr7:30262031 | 7   | 30.26203 | 0.007729693 | Credible Set | purple |
| chr7:30262034 | 7   | 30.26203 | 0.008253511 | Credible Set | purple |
| chr7:30289075 | 7   | 30.28908 | 0.005825148 | Credible Set | purple |
| chr7:30289086 | 7   | 30.28909 | 0.005893662 | Credible Set | purple |
| chr7:30289112 | 7   | 30.28911 | 0.005605923 | Credible Set | purple |
| chr7:30289270 | 7   | 30.28927 | 0.005751710 | Credible Set | purple |
| chr7:30289273 | 7   | 30.28927 | 0.005736705 | Credible Set | purple |
| chr7:30289902 | 7   | 30.28990 | 0.005662450 | Credible Set | purple |
| chr7:30289956 | 7   | 30.28996 | 0.005716106 | Credible Set | purple |
| chr7:30290355 | 7   | 30.29036 | 0.005092684 | Credible Set | purple |
| chr7:30301382 | 7   | 30.30138 | 0.005027048 | Credible Set | purple |

Fine-mapping Regions

| snp           | chr | pos (Mb) | pp          | group        | color  |
|---------------|-----|----------|-------------|--------------|--------|
| chr7:30316542 | 7   | 30.31654 | 0.007256893 | Credible Set | purple |
| chr7:30326035 | 7   | 30.32604 | 0.006264187 | Credible Set | purple |
| chr7:30327435 | 7   | 30.32744 | 0.005610562 | Credible Set | purple |
| chr7:30381850 | 7   | 30.38185 | 0.003805361 | Credible Set | purple |



F39–43 GBS, body weight day 1

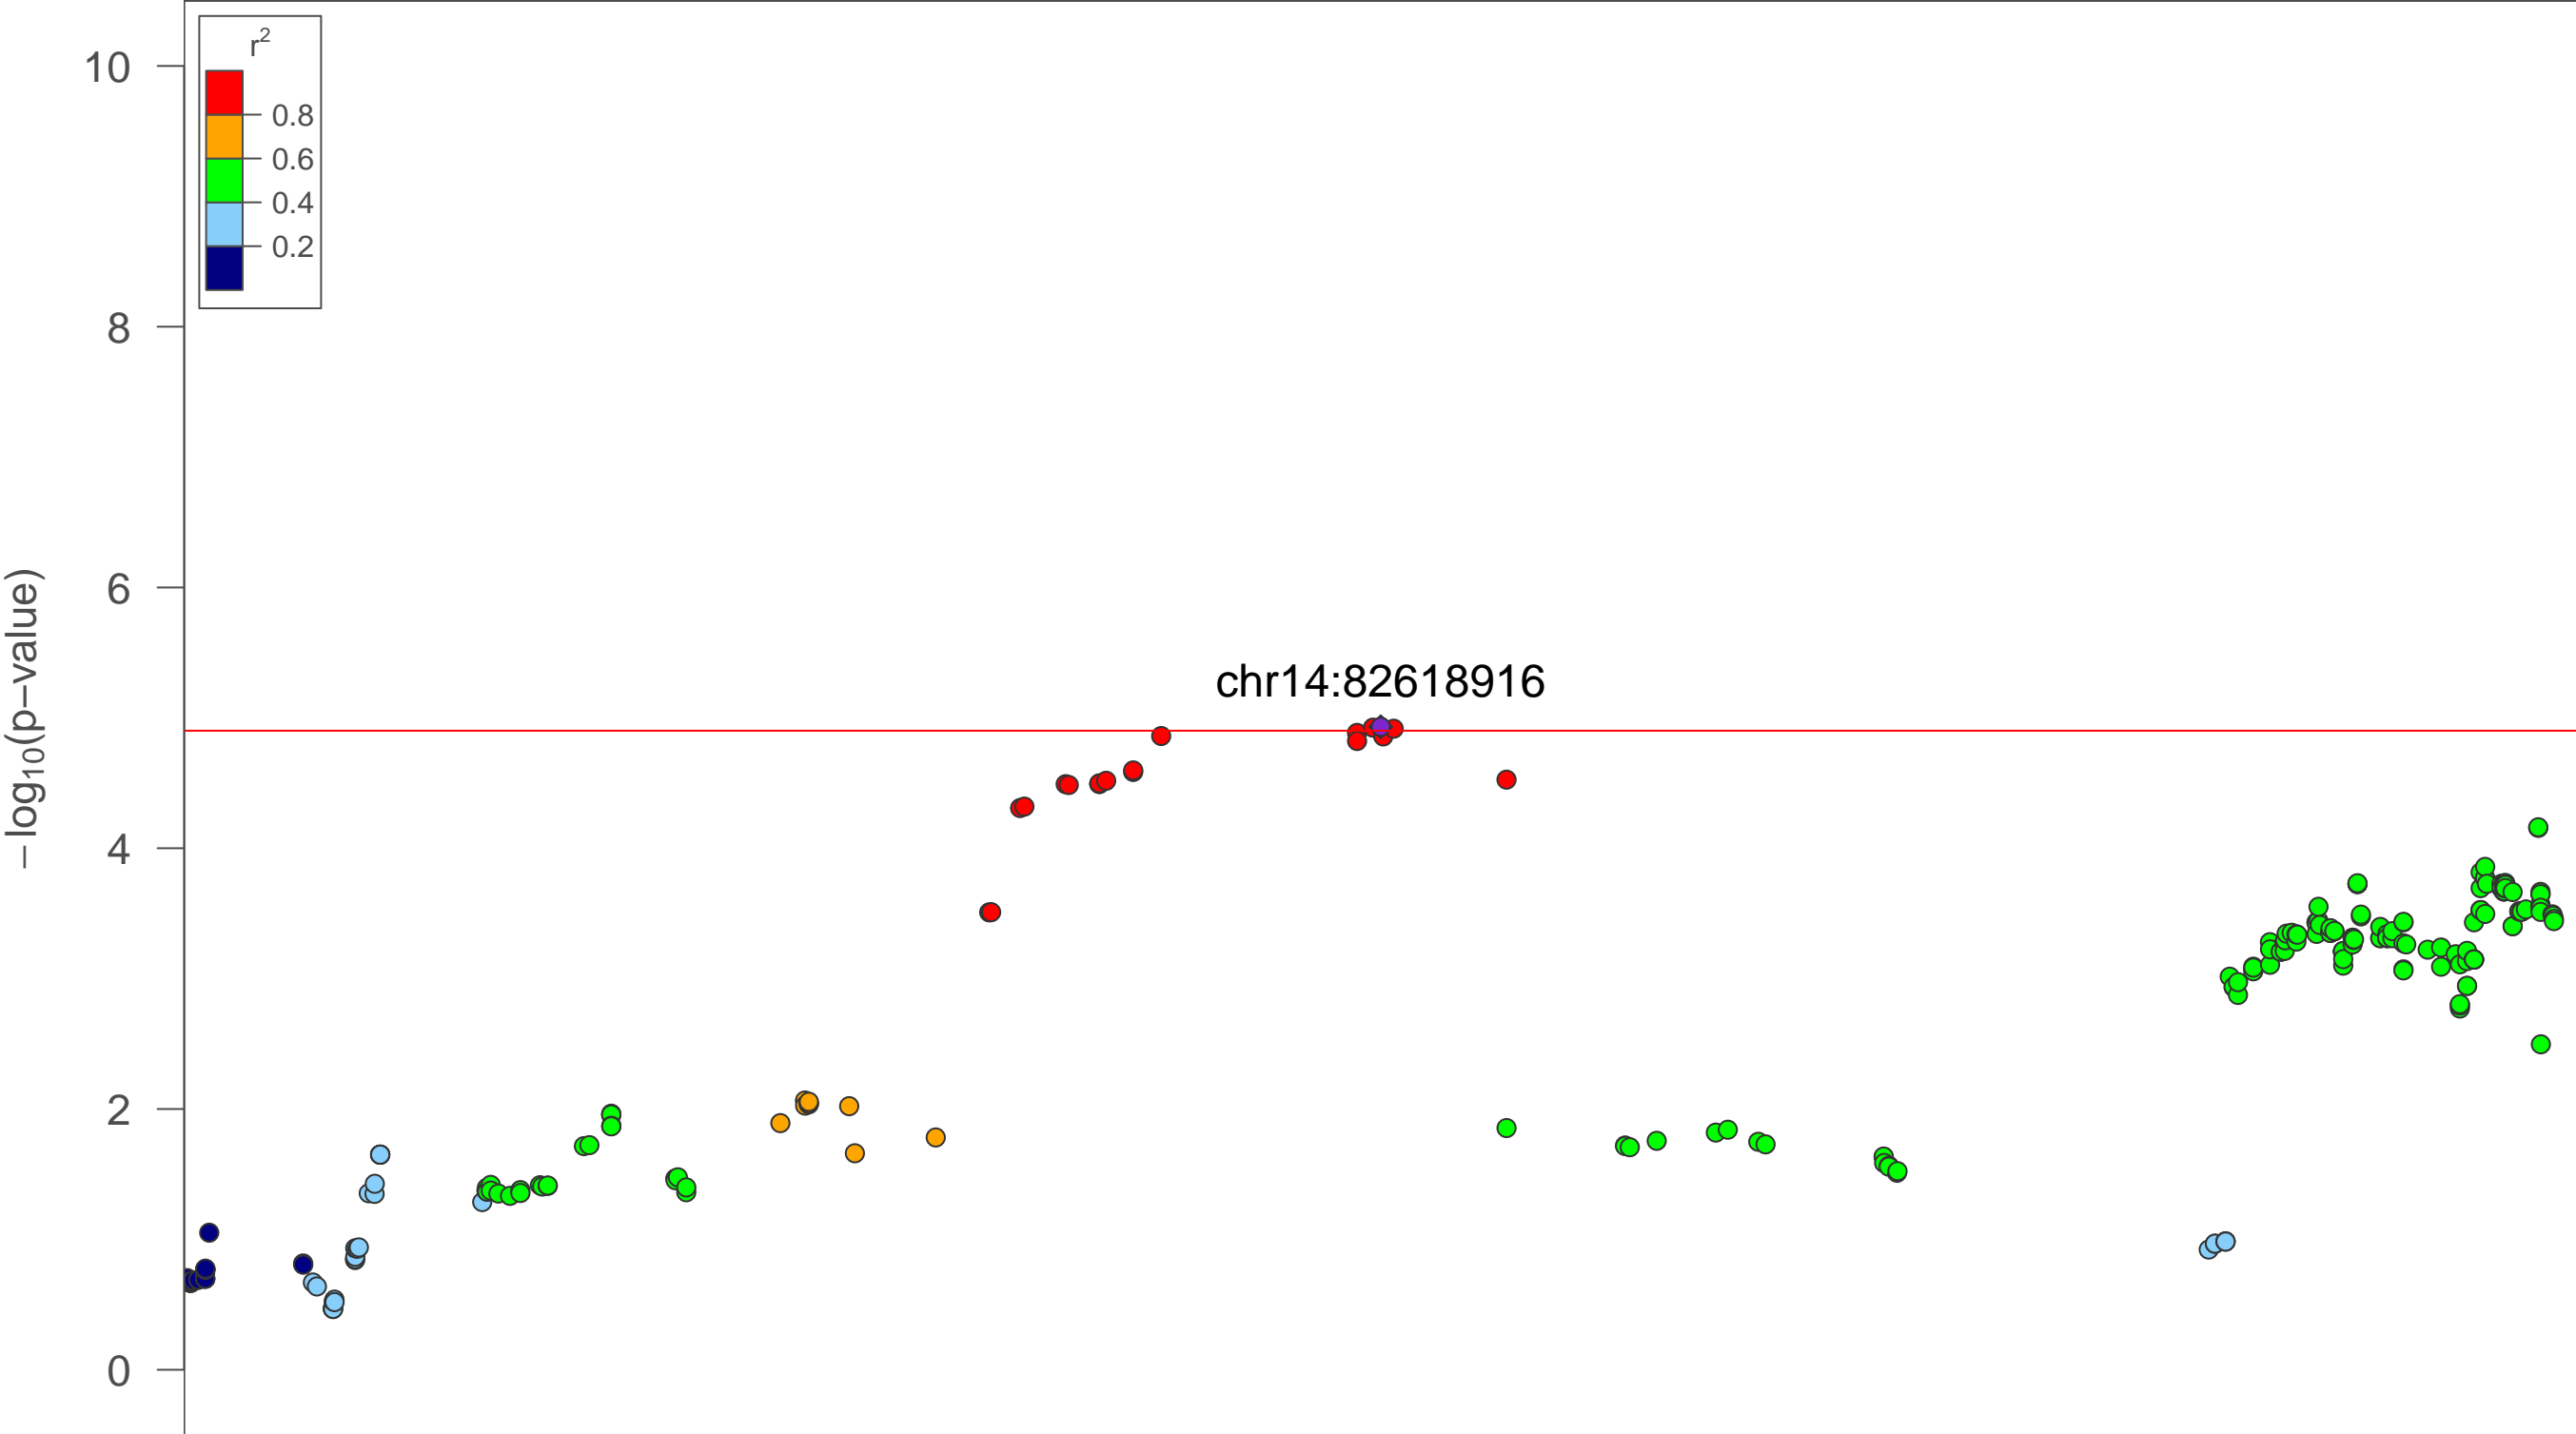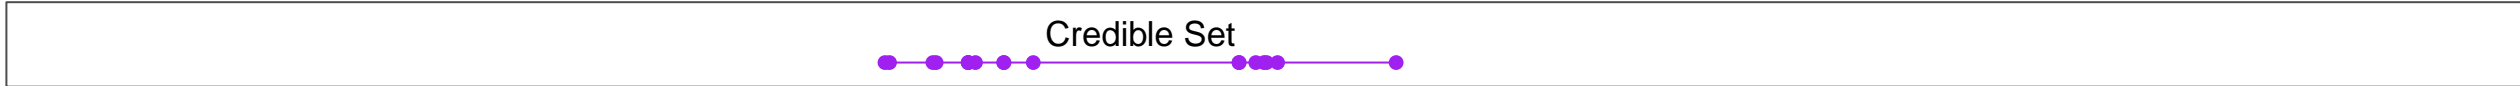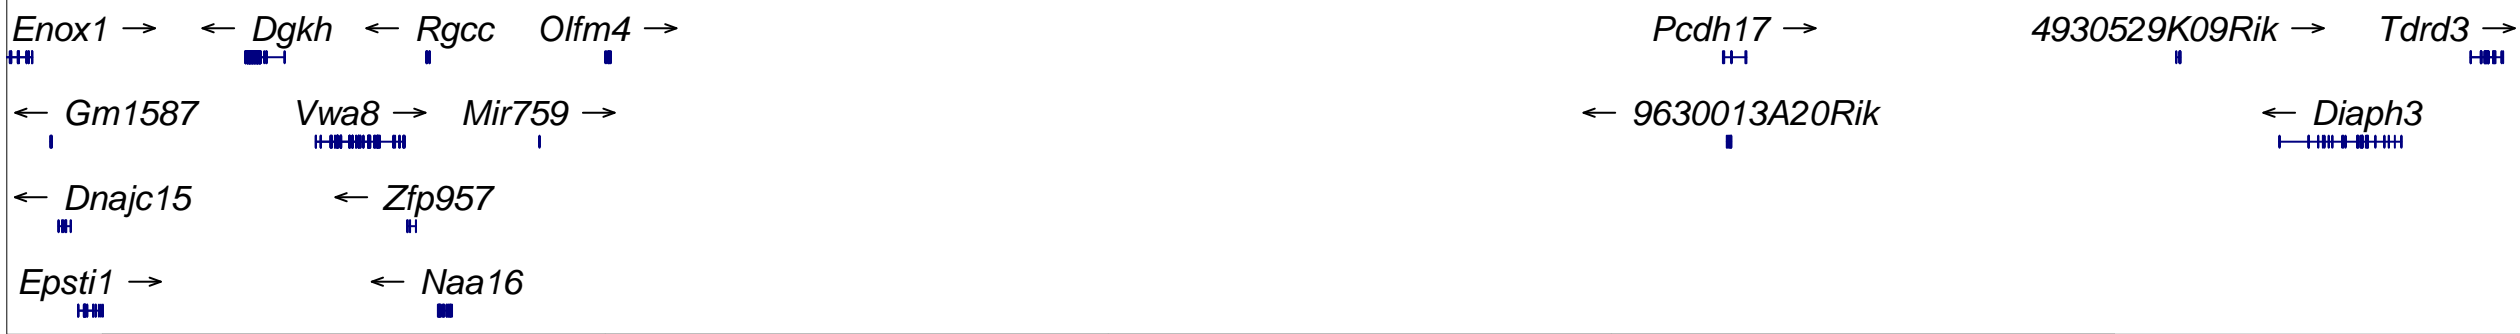

14 genes  
omitted

date: Thu Oct 25 17:20:37 2018

build: F3943GBS

display range: chr14:77618916–87618916 [77618916–87618916]

hilite range: 0 – 0 [ 0 – 0 ]

reference SNP: chr14:82618916

number of SNPs plotted: 260

min P-value: 1.17E–5 [chr14:82618916]

max P-value: 3.42E–1 [chr14:78241501]

omitted Genes: Fam216b, Mir1971, Tnfsf11

omitted Genes: Akap11, Mtrf1, Kbtbd7

omitted Genes: Kbtbd6, Wbp4, Elf1

omitted Genes: Sugt1, Lect1, 4930452G13Rik

omitted Genes: Pcdh8, Gm10845

Fine-mapping Regions

| snp            | chr | pos (Mb) | pp         | group        | color  |
|----------------|-----|----------|------------|--------------|--------|
| chr14:81112053 | 14  | 81.11205 | 0.02402823 | Credible Set | purple |
| chr14:81129931 | 14  | 81.12993 | 0.02462348 | Credible Set | purple |
| chr14:81302522 | 14  | 81.30252 | 0.03584985 | Credible Set | purple |
| chr14:81315250 | 14  | 81.31525 | 0.03533937 | Credible Set | purple |
| chr14:81443053 | 14  | 81.44305 | 0.03593258 | Credible Set | purple |
| chr14:81443088 | 14  | 81.44309 | 0.03604954 | Credible Set | purple |
| chr14:81443103 | 14  | 81.44310 | 0.03636872 | Credible Set | purple |
| chr14:81471656 | 14  | 81.47166 | 0.03796048 | Credible Set | purple |
| chr14:81584557 | 14  | 81.58456 | 0.04401372 | Credible Set | purple |
| chr14:81584584 | 14  | 81.58458 | 0.04518519 | Credible Set | purple |
| chr14:81701500 | 14  | 81.70150 | 0.08054753 | Credible Set | purple |
| chr14:82519671 | 14  | 82.51967 | 0.08492962 | Credible Set | purple |
| chr14:82519834 | 14  | 82.51983 | 0.07406665 | Credible Set | purple |
| chr14:82586326 | 14  | 82.58633 | 0.09274759 | Credible Set | purple |
| chr14:82618916 | 14  | 82.61892 | 0.09409563 | Credible Set | purple |
| chr14:82629334 | 14  | 82.62933 | 0.08000369 | Credible Set | purple |
| chr14:82672838 | 14  | 82.67284 | 0.09111274 | Credible Set | purple |
| chr14:83144282 | 14  | 83.14428 | 0.03866860 | Credible Set | purple |

F39–43 GBS, body weight day 2

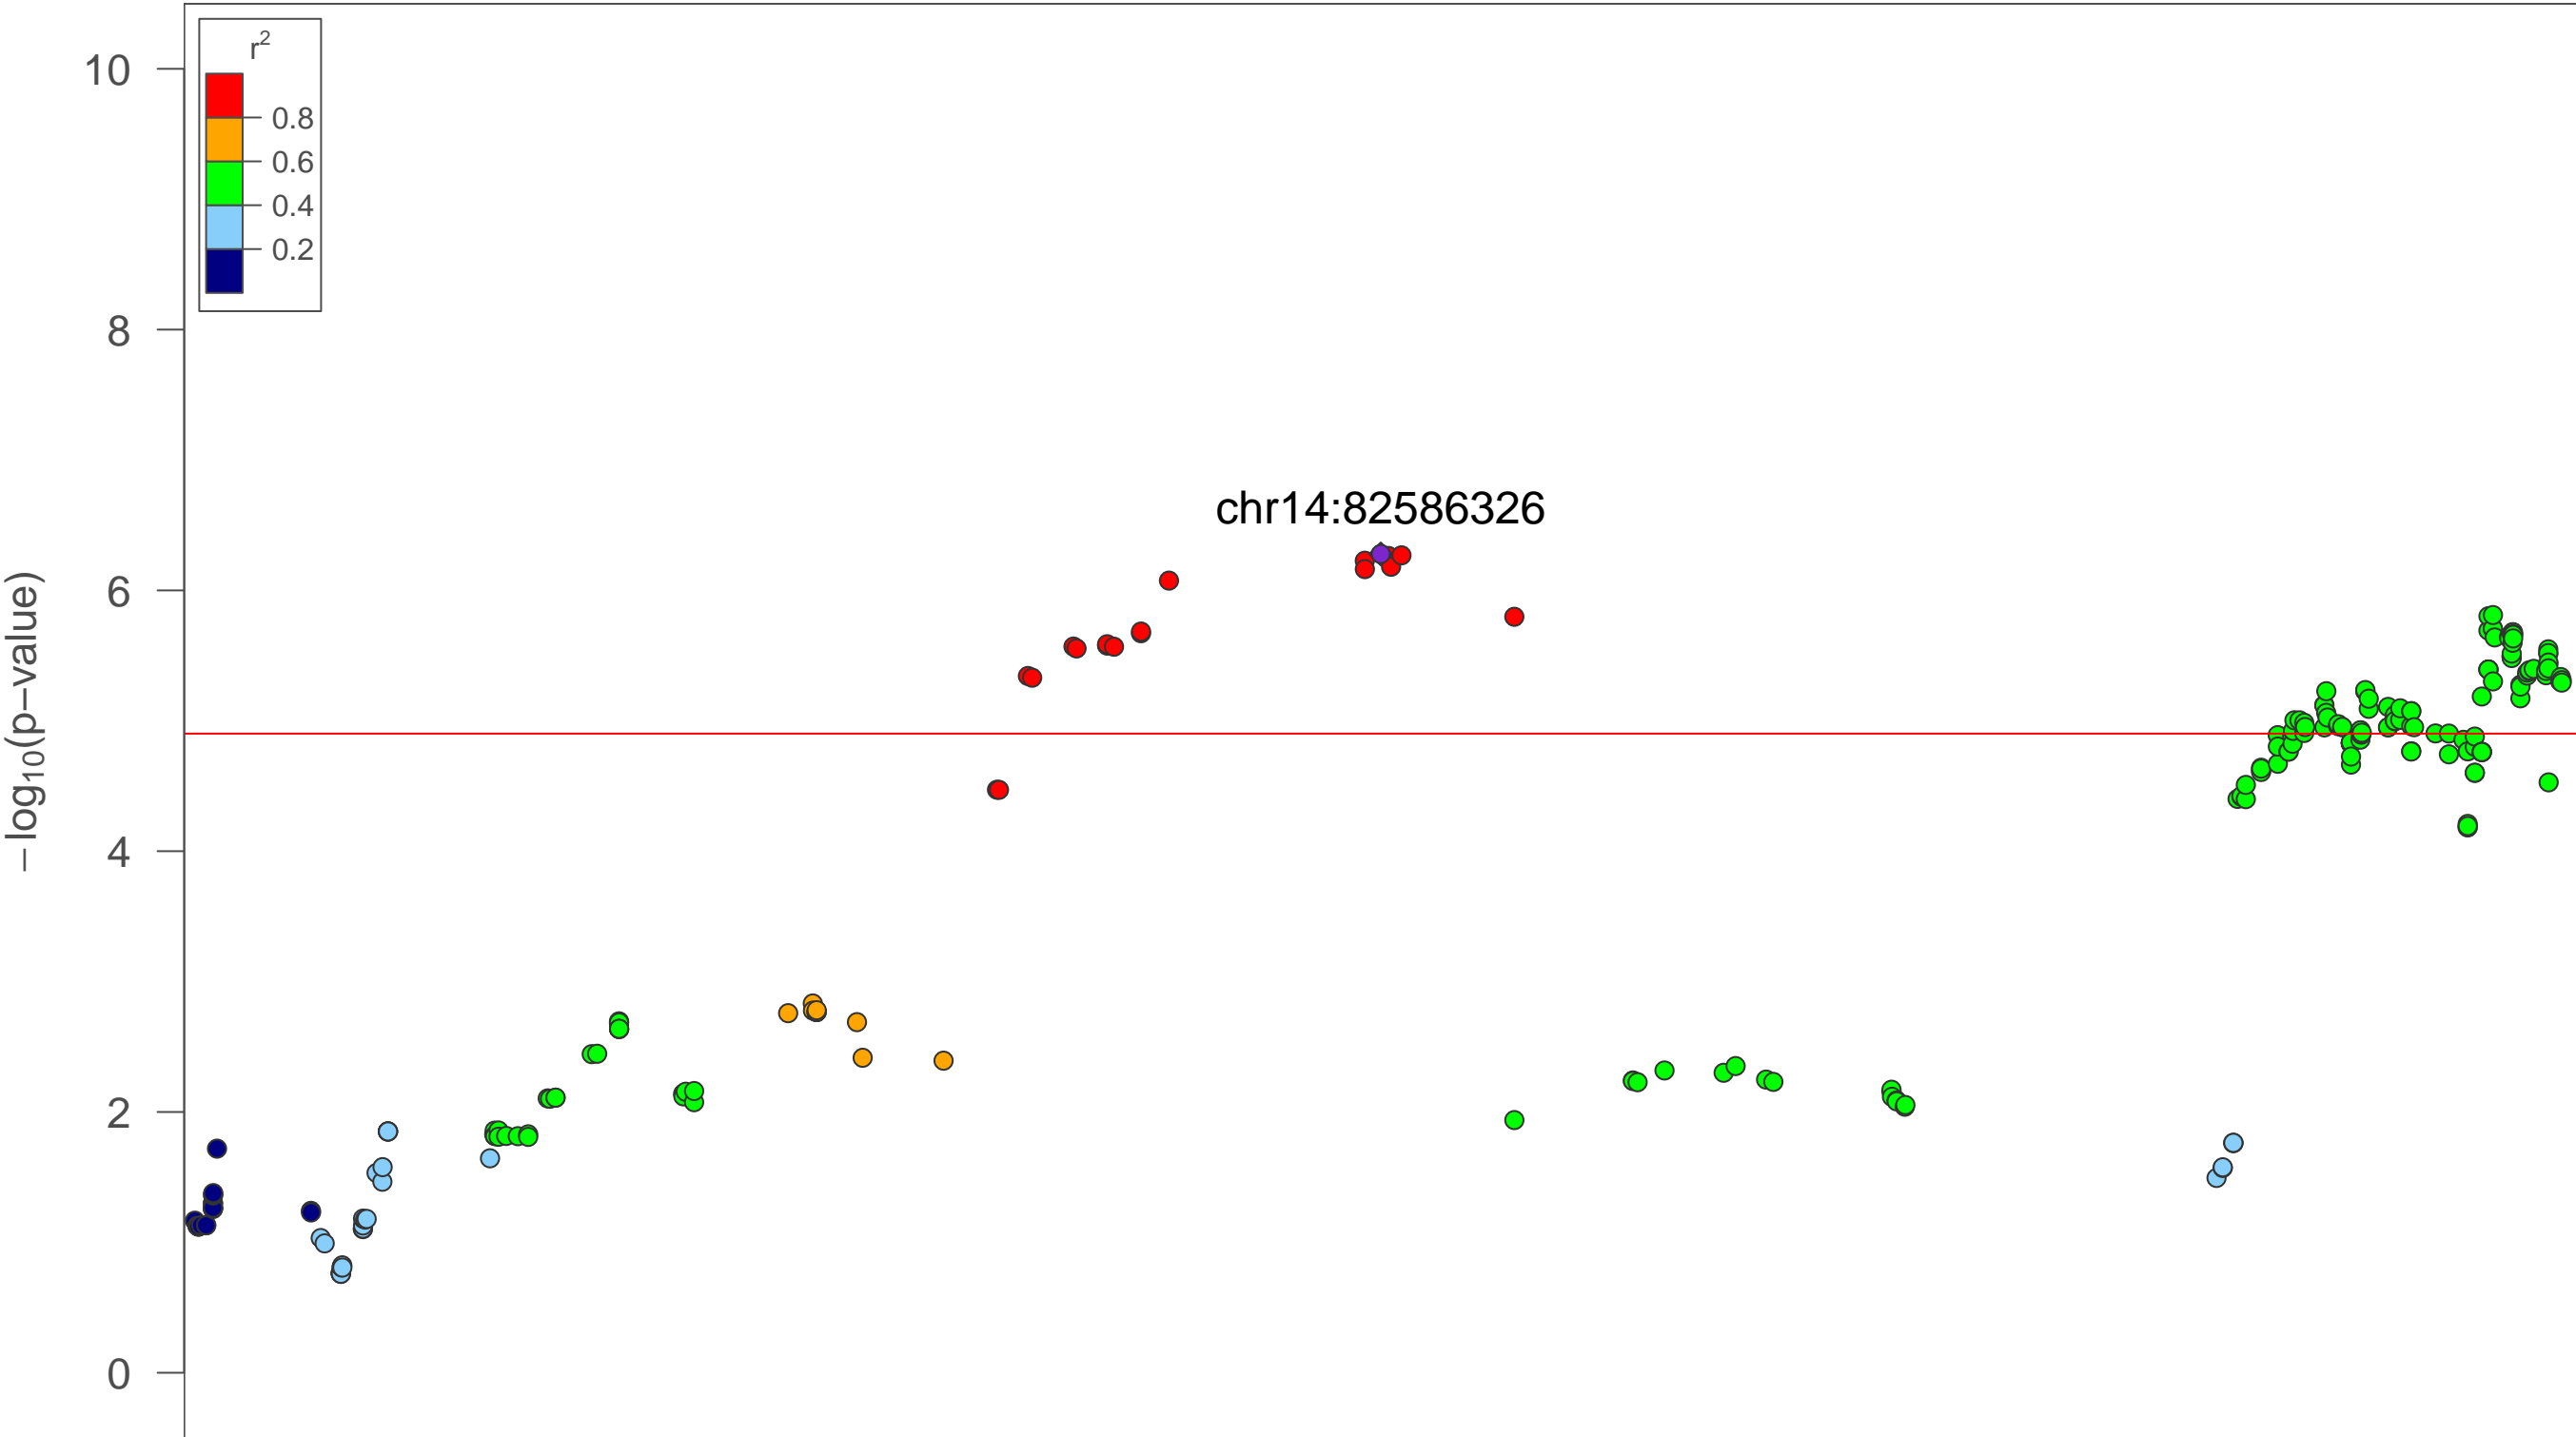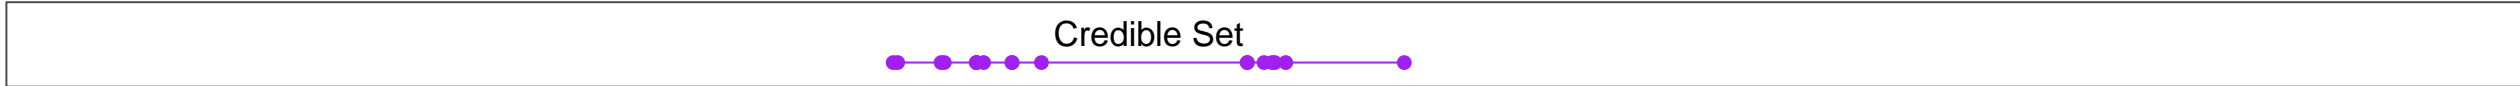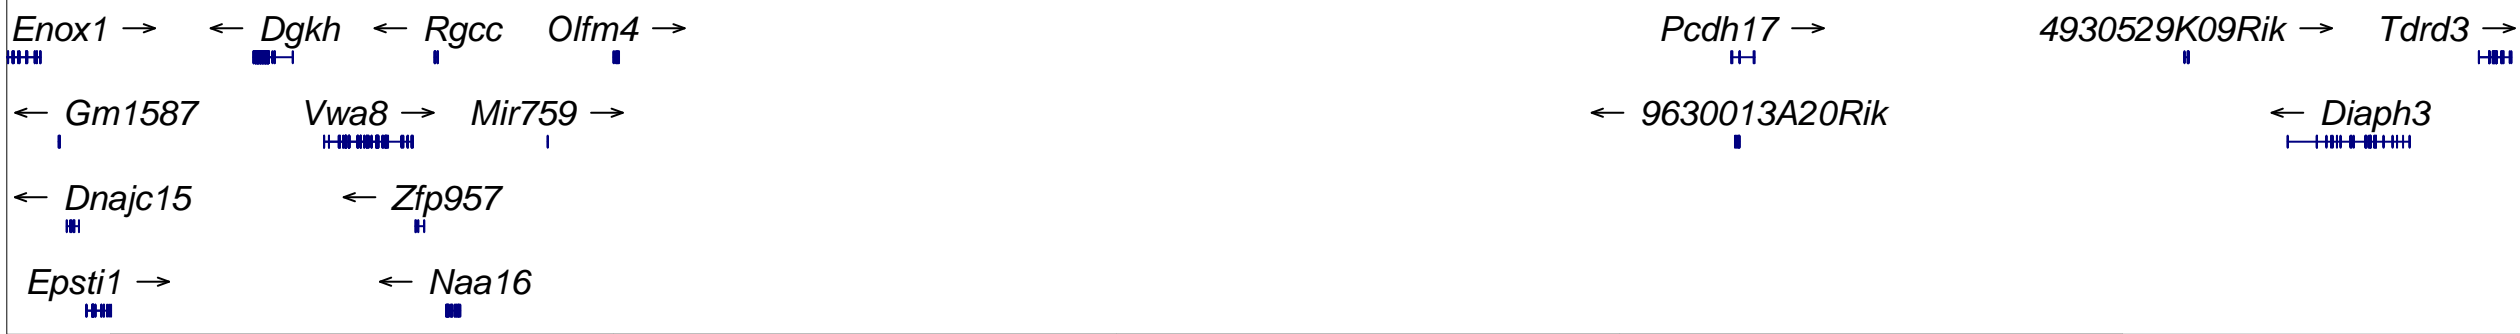

14 genes  
omitted

date: Thu Oct 25 17:20:44 2018

build: F3943GBS

display range: chr14:77586326–87586326 [77586326–87586326]

hilite range: 0 – 0 [ 0 – 0 ]

reference SNP: chr14:82586326

number of SNPs plotted: 260

min P-value: 5.25E-7 [chr14:82586326]

max P-value: 1.74E-1 [chr14:78241501]

omitted Genes: Fam216b, Mir1971, Tnfsf11

omitted Genes: Akap11, Mtrf1, Kbtbd7

omitted Genes: Kbtbd6, Wbp4, Elf1

omitted Genes: Sugt1, Lect1, 4930452G13Rik

omitted Genes: Pcdh8, Gm10845

Fine-mapping Regions

| snp            | chr | pos (Mb) | pp         | group        | color  |
|----------------|-----|----------|------------|--------------|--------|
| chr14:81112053 | 14  | 81.11205 | 0.01490137 | Credible Set | purple |
| chr14:81129931 | 14  | 81.12993 | 0.01447357 | Credible Set | purple |
| chr14:81302522 | 14  | 81.30252 | 0.02452853 | Credible Set | purple |
| chr14:81315250 | 14  | 81.31525 | 0.02373874 | Credible Set | purple |
| chr14:81443053 | 14  | 81.44305 | 0.02493733 | Credible Set | purple |
| chr14:81443088 | 14  | 81.44309 | 0.02516714 | Credible Set | purple |
| chr14:81443103 | 14  | 81.44310 | 0.02551083 | Credible Set | purple |
| chr14:81471656 | 14  | 81.47166 | 0.02445477 | Credible Set | purple |
| chr14:81584557 | 14  | 81.58456 | 0.03075131 | Credible Set | purple |
| chr14:81584584 | 14  | 81.58458 | 0.03163767 | Credible Set | purple |
| chr14:81701500 | 14  | 81.70150 | 0.07512201 | Credible Set | purple |
| chr14:82519671 | 14  | 82.51967 | 0.10542503 | Credible Set | purple |
| chr14:82519834 | 14  | 82.51983 | 0.09131098 | Credible Set | purple |
| chr14:82586326 | 14  | 82.58633 | 0.11823370 | Credible Set | purple |
| chr14:82618916 | 14  | 82.61892 | 0.11422741 | Credible Set | purple |
| chr14:82629334 | 14  | 82.62933 | 0.09506362 | Credible Set | purple |
| chr14:82672838 | 14  | 82.67284 | 0.11550022 | Credible Set | purple |
| chr14:83144282 | 14  | 83.14428 | 0.04063550 | Credible Set | purple |

F39–43 GBS, body weight day 3

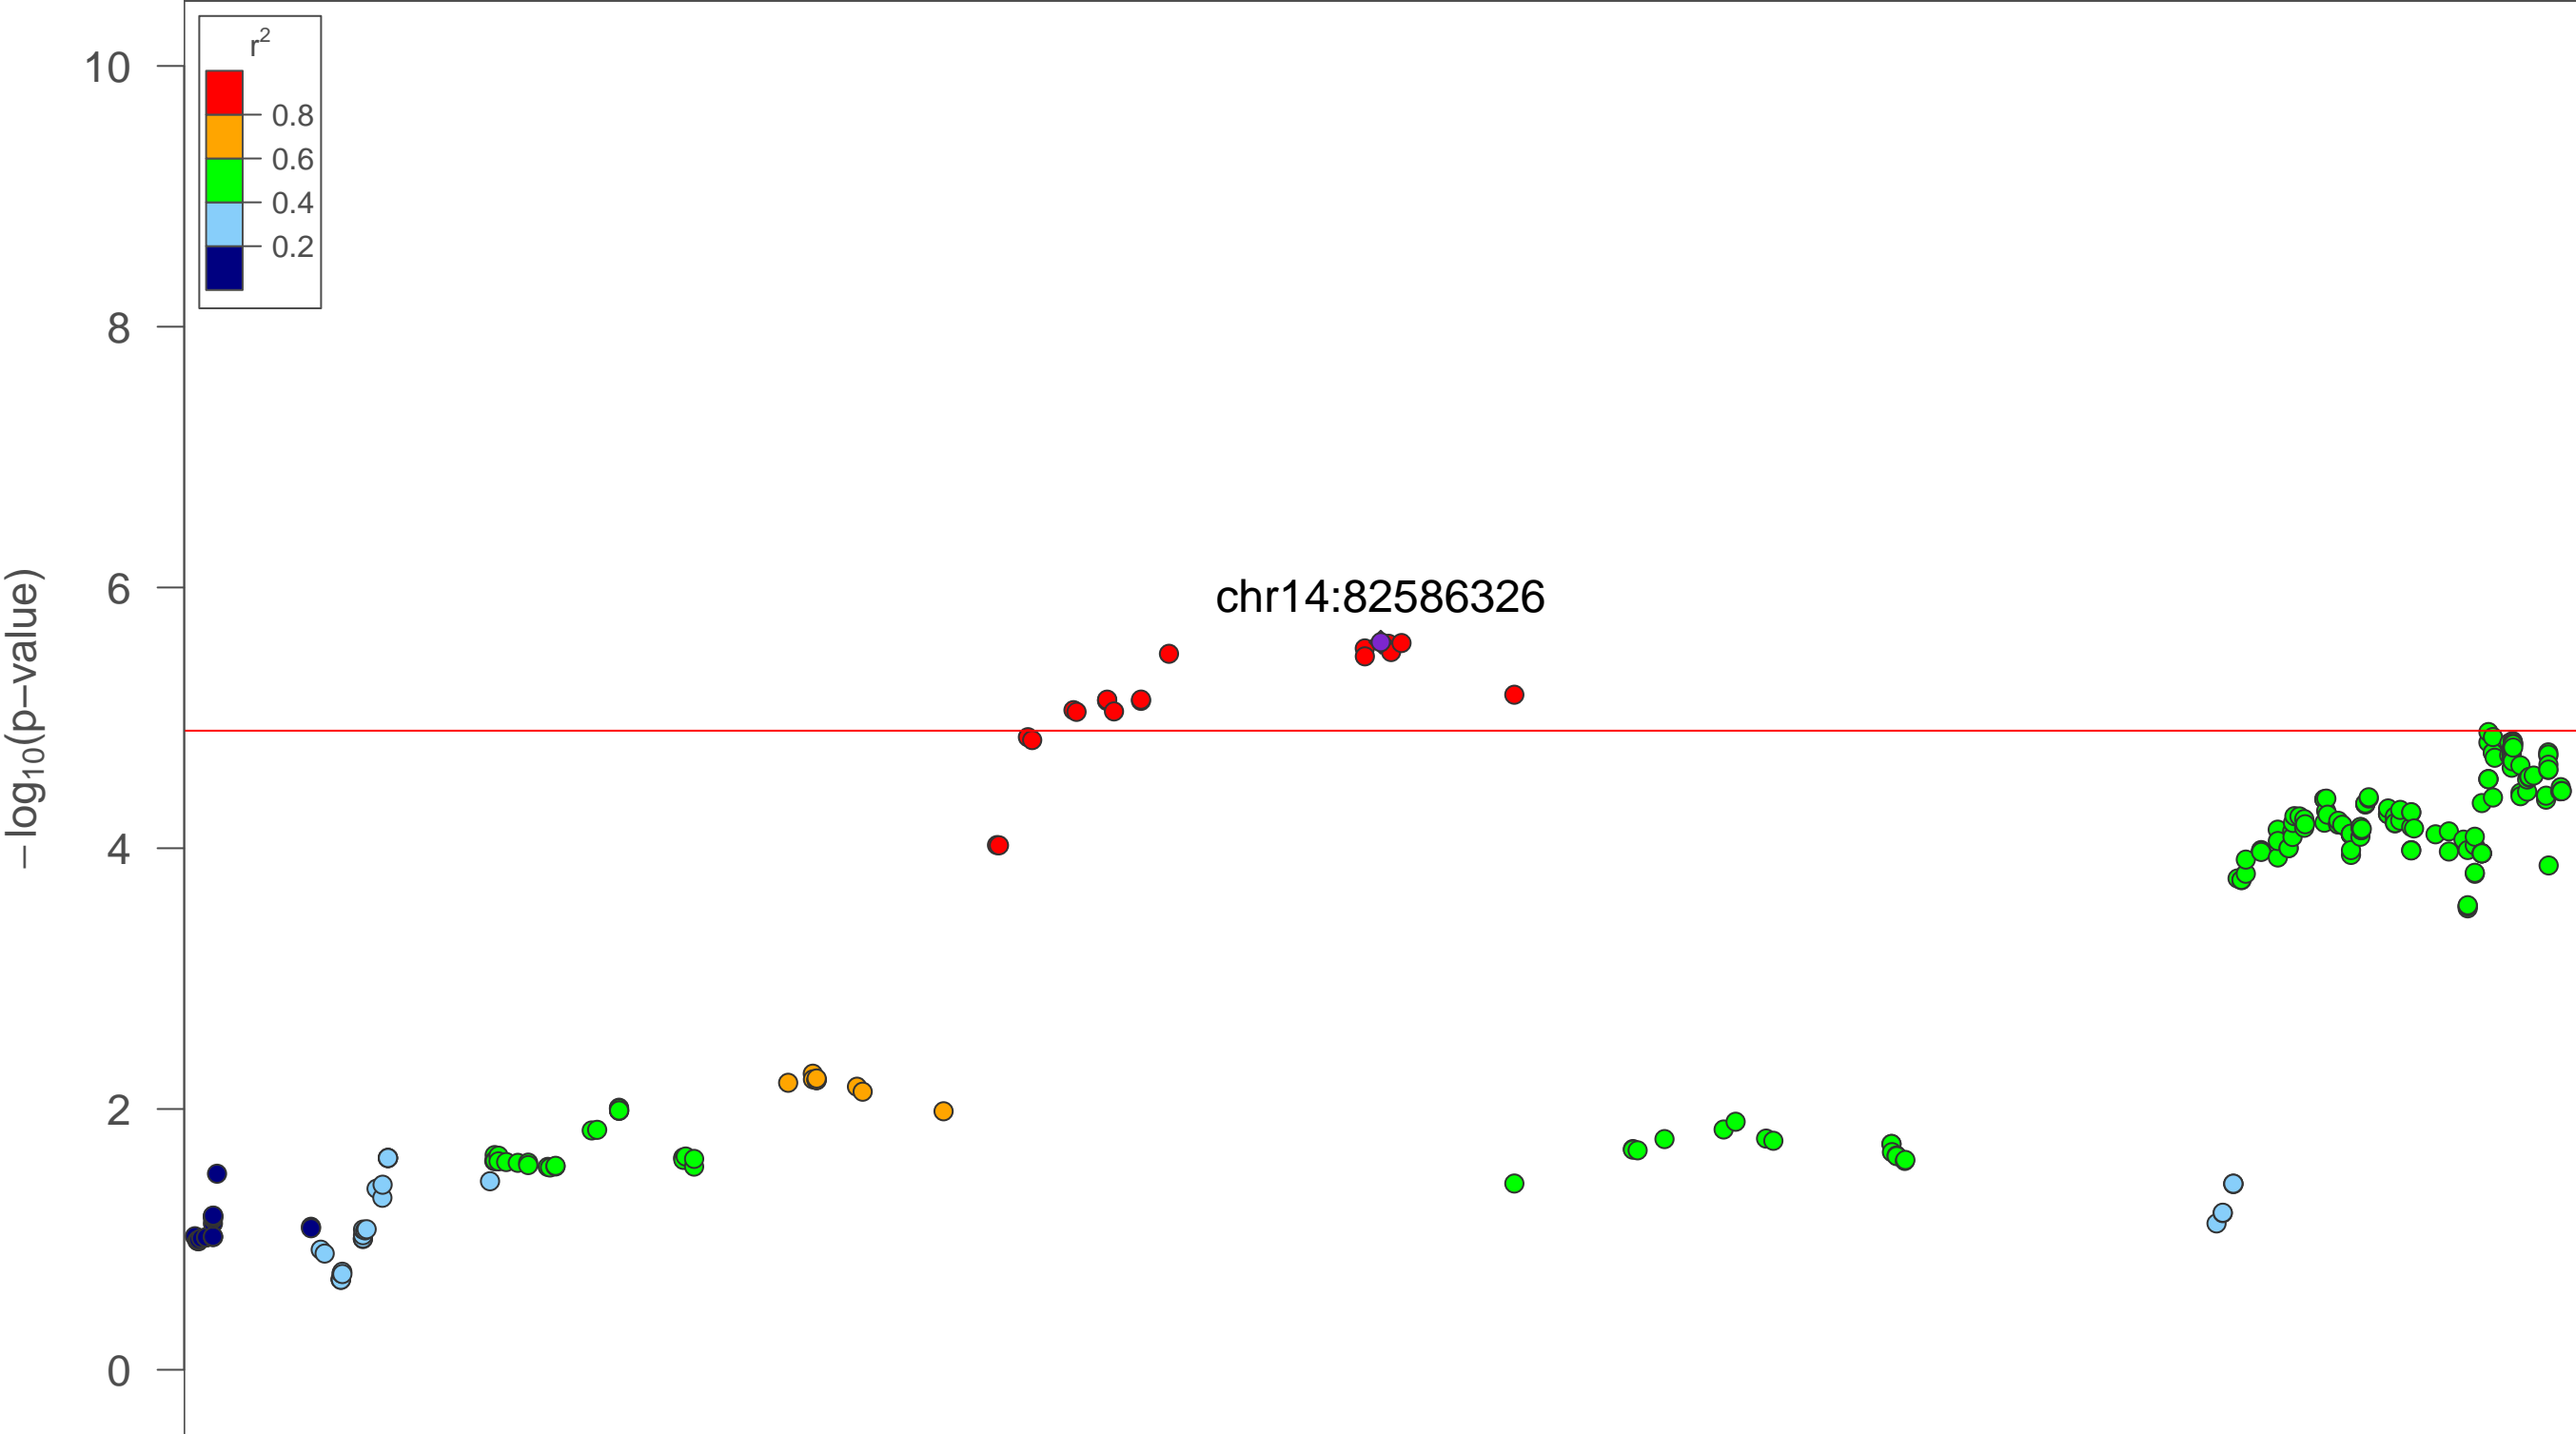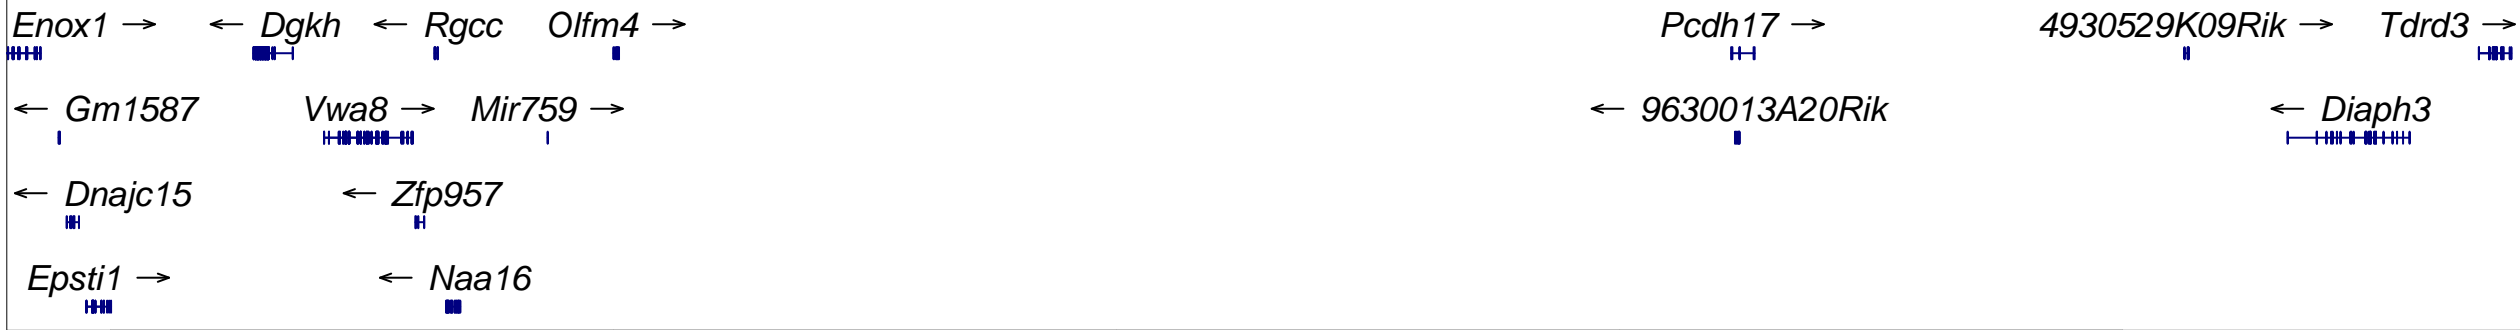

14 genes  
omitted

date: Thu Oct 25 17:20:51 2018

build: F3943GBS

display range: chr14:77586326–87586326 [77586326–87586326]

hilite range: 0 – 0 [ 0 – 0 ]

reference SNP: chr14:82586326

number of SNPs plotted: 260

min P-value: 2.63E–6 [chr14:82586326]

max P-value: 2.04E–1 [chr14:78241501]

omitted Genes: Fam216b, Mir1971, Tnfsf11

omitted Genes: Akap11, Mtrf1, Kbtbd7

omitted Genes: Kbtbd6, Wbp4, Elf1

omitted Genes: Sugt1, Lect1, 4930452G13Rik

omitted Genes: Pcdh8, Gm10845



Fine-mapping Regions

| snp            | chr | pos (Mb) | pp         | group        | color  |
|----------------|-----|----------|------------|--------------|--------|
| chr14:81112053 | 14  | 81.11205 | 0.02010840 | Credible Set | purple |
| chr14:81129931 | 14  | 81.12993 | 0.01914174 | Credible Set | purple |
| chr14:81302522 | 14  | 81.30252 | 0.03170730 | Credible Set | purple |
| chr14:81315250 | 14  | 81.31525 | 0.03079619 | Credible Set | purple |
| chr14:81443053 | 14  | 81.44305 | 0.03699838 | Credible Set | purple |
| chr14:81443088 | 14  | 81.44309 | 0.03754149 | Credible Set | purple |
| chr14:81443103 | 14  | 81.44310 | 0.03788507 | Credible Set | purple |
| chr14:81471656 | 14  | 81.47166 | 0.03103994 | Credible Set | purple |
| chr14:81584557 | 14  | 81.58456 | 0.03707361 | Credible Set | purple |
| chr14:81584584 | 14  | 81.58458 | 0.03792188 | Credible Set | purple |
| chr14:81701500 | 14  | 81.70150 | 0.08223439 | Credible Set | purple |
| chr14:82519671 | 14  | 82.51967 | 0.09010403 | Credible Set | purple |
| chr14:82519834 | 14  | 82.51983 | 0.07874841 | Credible Set | purple |
| chr14:82586326 | 14  | 82.58633 | 0.10014396 | Credible Set | purple |
| chr14:82618916 | 14  | 82.61892 | 0.09747427 | Credible Set | purple |
| chr14:82629334 | 14  | 82.62933 | 0.08469180 | Credible Set | purple |
| chr14:82672838 | 14  | 82.67284 | 0.09867105 | Credible Set | purple |
| chr14:83144282 | 14  | 83.14428 | 0.04114562 | Credible Set | purple |

# F39–43 GBS, coat color, albino

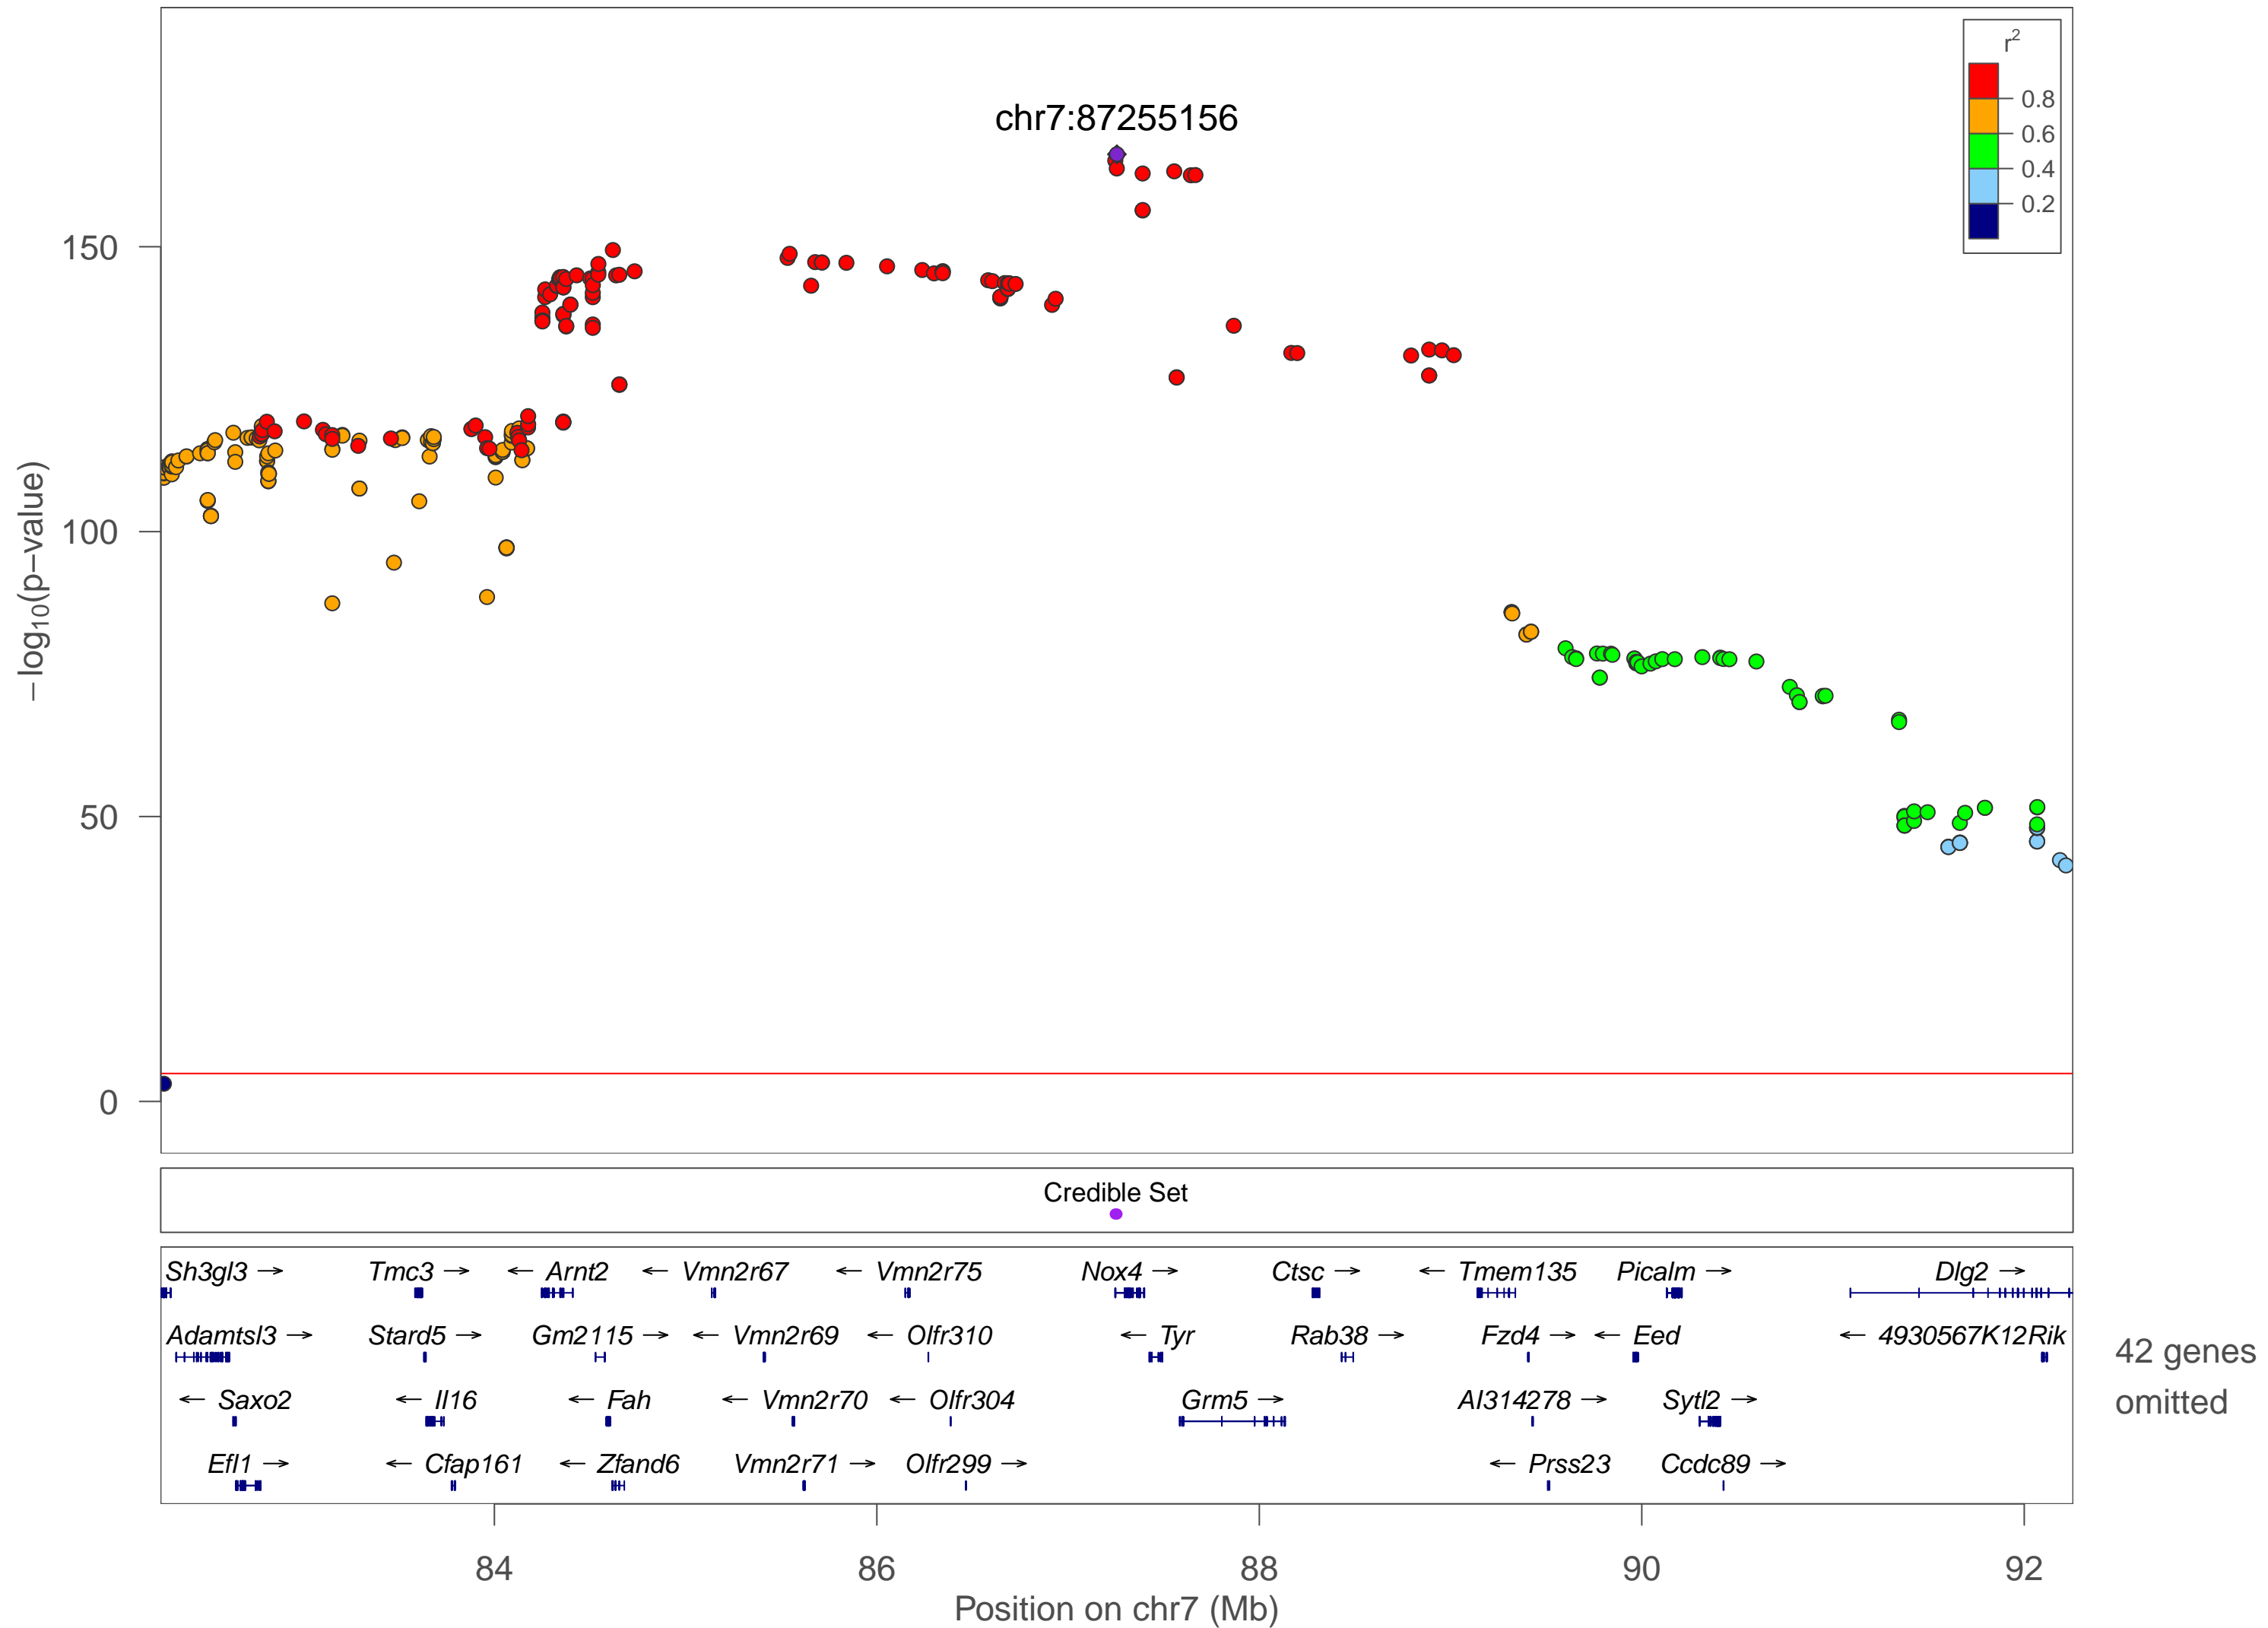

date: Thu Oct 25 17:21:12 2018  
build: F3943GBS  
display range: chr7:82255156–92255156 [82255156–92255156]  
hilite range: 0 – 0 [ 0 – 0 ]  
reference SNP: chr7:87255156  
number of SNPs plotted: 313  
min P-value: 5.91E–167 [chr7:87255156]  
max P-value: 7.79E–4 [chr7:82271732]  
omitted Genes: 4933406J10Rik, Mex3b, 4933430H16Rik  
omitted Genes: Mesdc1, Mesdc2, Cemip  
omitted Genes: Abhd17c, 2610206C17Rik, Olfr291  
omitted Genes: Olfr290, Vmn2r65, Vmn2r66  
omitted Genes: Vmn2r68, Vmn2r72, Vmn2r73  
omitted Genes: Vmn2r74, Vmn2r76, Olfr309  
omitted Genes: Olfr308, Olfr307, Olfr305  
omitted Genes: Olfr303, Olfr301, Olfr298  
omitted Genes: Olfr297, Olfr295, Olfr294  
omitted Genes: Olfr293, Olfr292, Folh1  
omitted Genes: Vmn2r77, Vmn2r78, Vmn2r79  
omitted Genes: Me3, Ccdc81, I7Rn6  
omitted Genes: E230029C05Rik, 2310010J17Rik, Ccdc83  
omitted Genes: Crebzf, Tmem126a, Tmem126b

Fine-mapping Regions

| snp           | chr | pos (Mb) | pp         | group        | color  |
|---------------|-----|----------|------------|--------------|--------|
| chr7:87246786 | 7   | 87.24679 | 0.07055338 | Credible Set | purple |
| chr7:87255156 | 7   | 87.25516 | 0.92467500 | Credible Set | purple |

# F39–43 GBS, coat color, agouti

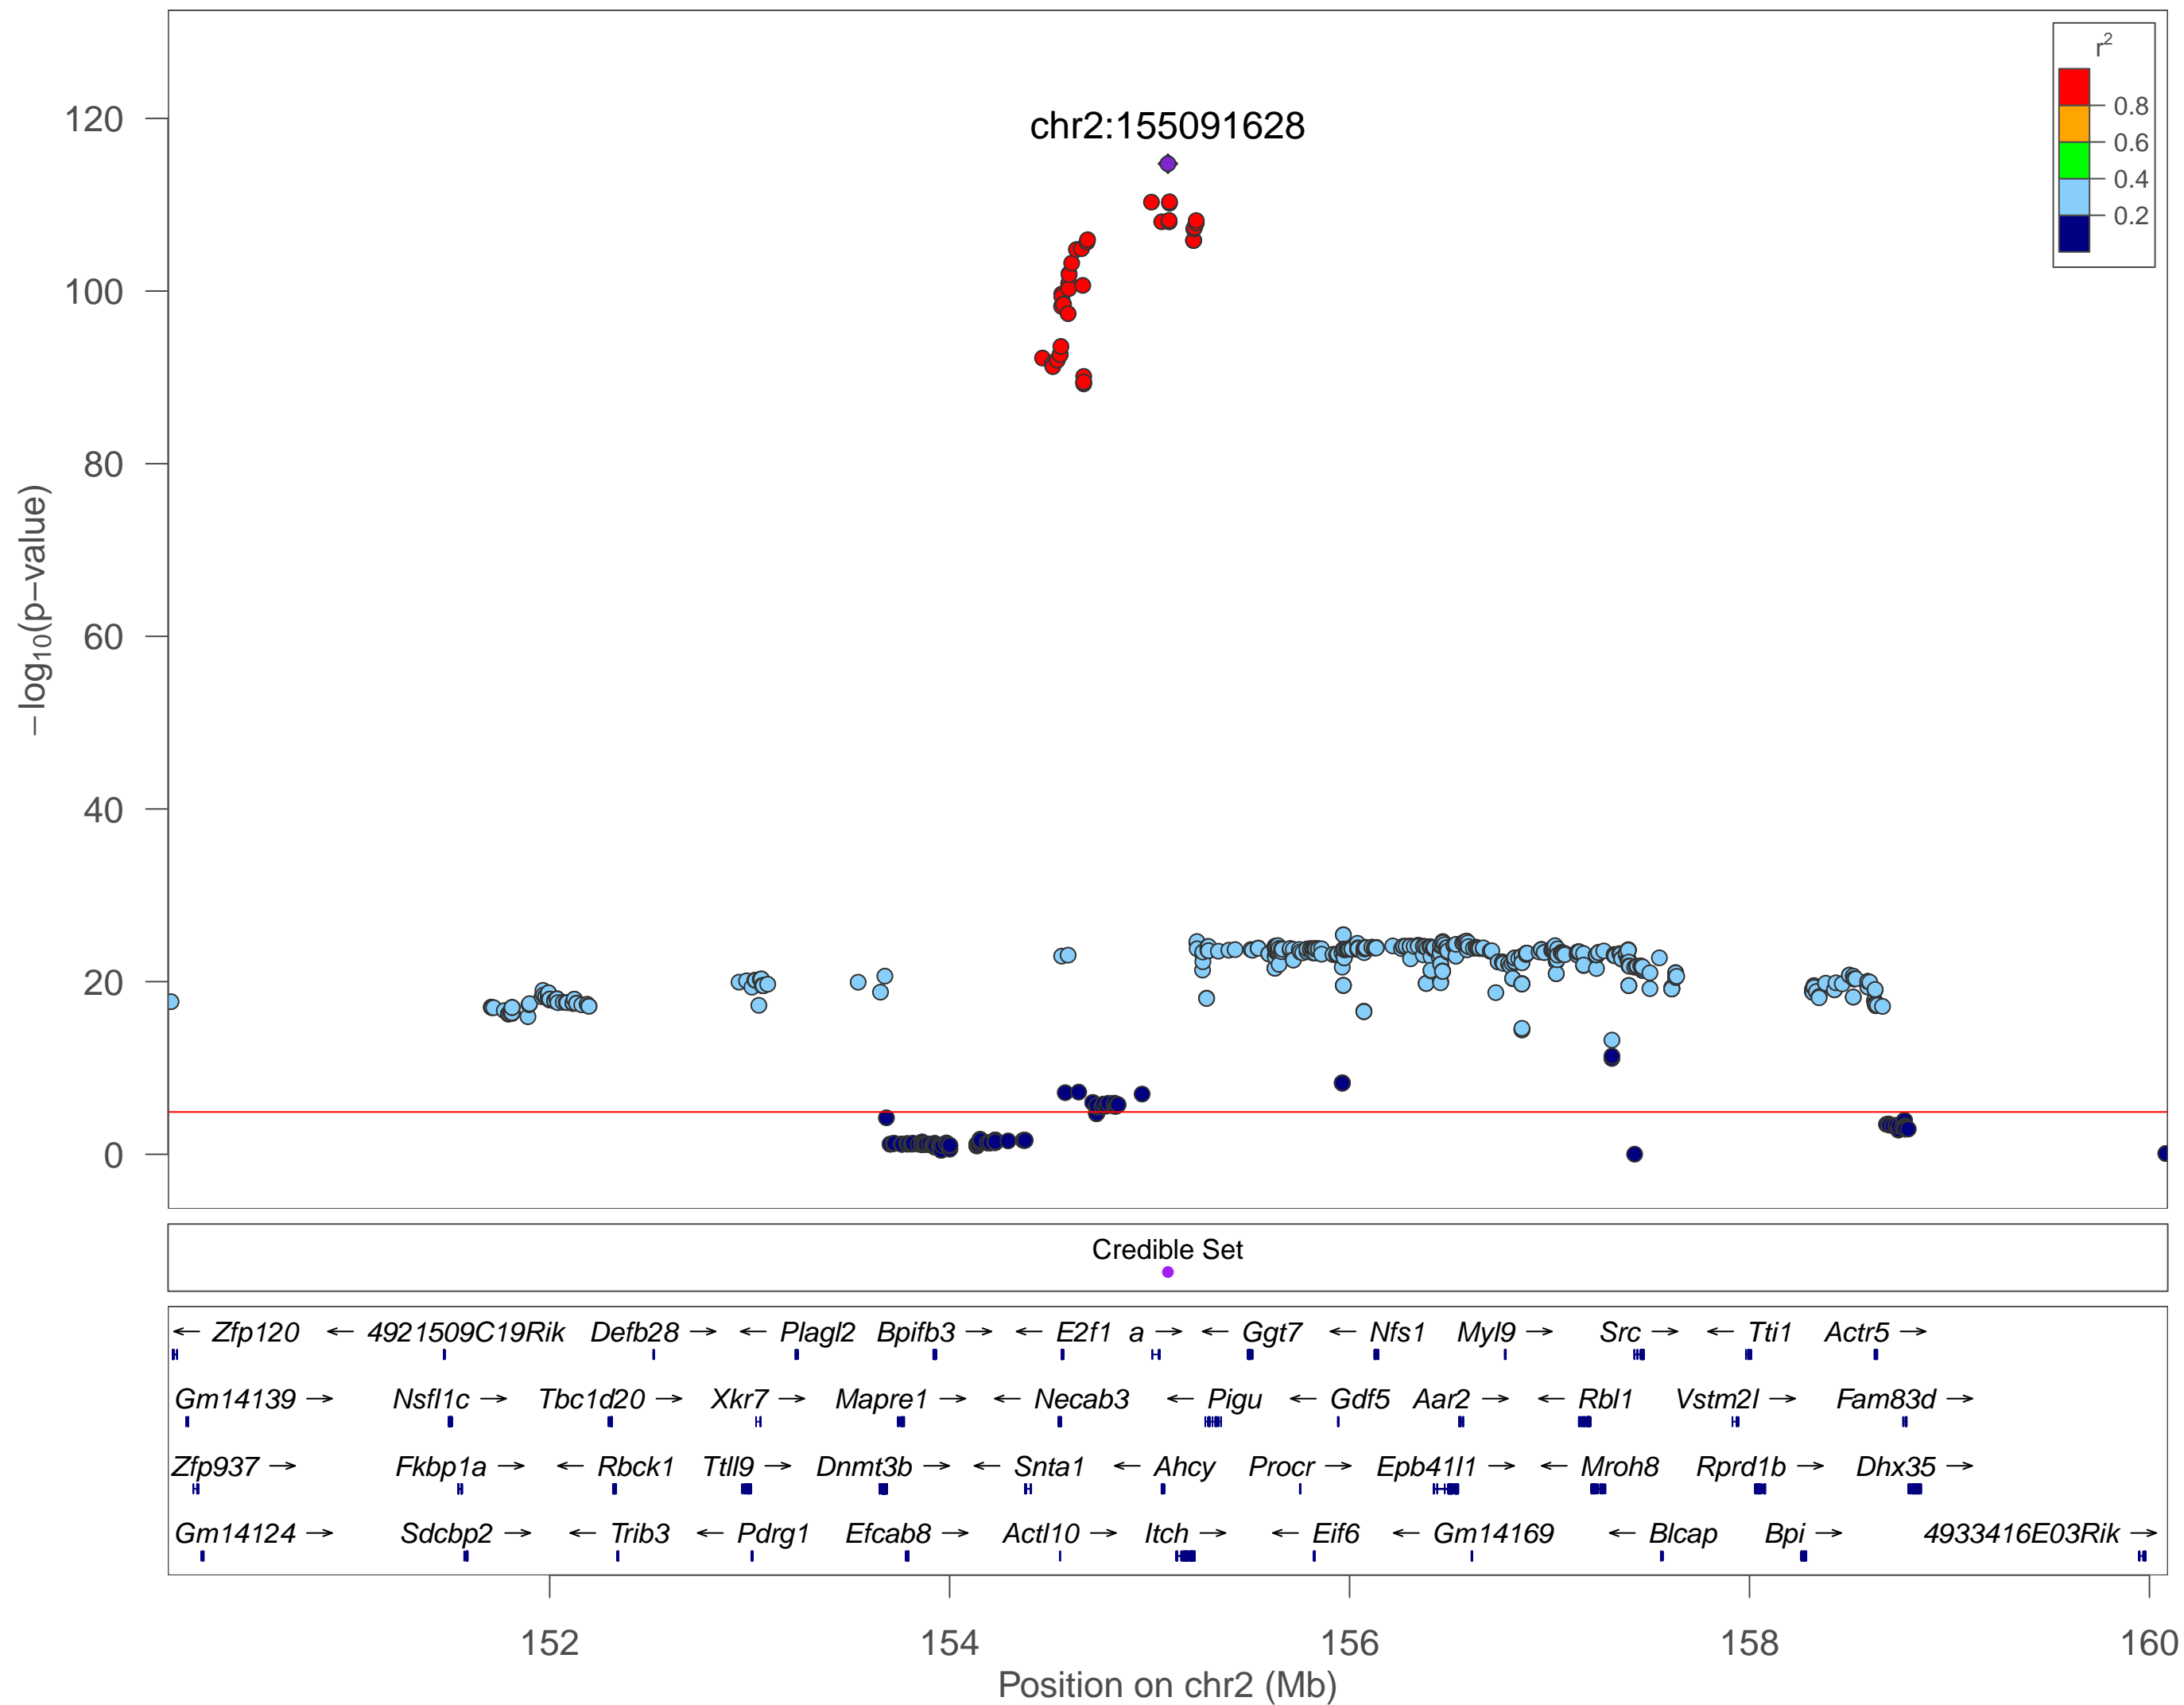

date: Thu Oct 25 17:21:58 2018

build: F3943GBS

display range: chr2:150091628–160091628 [150091628–160091628]

hilite range: 0 – 0 [ 0 – 0 ]

reference SNP: chr2:155091628

number of SNPs plotted: 758

min P-value: 1.78E–115 [chr2:155091628]

max P-value: 9.64E–1 [chr2:157425605]

omitted Genes: 3300002I08Rik, Zfp442, Zfp345

omitted Genes: Cst7, Apmmap, Acss1

omitted Genes: E130215H24Rik, Vsx1, Entpd6

omitted Genes: Pygb, Abhd12, Gins1

omitted Genes: Ninl, Nanp, Gm14151

omitted Genes: 4930442J19Rik, LOC100125594, Snph

omitted Genes: Rad21l, Tmem74b, Psmf1

omitted Genes: Rspo4, Angpt4, Mir1953

omitted Genes: Fam110a, Slc52a3, Scrt2

omitted Genes: Srxn1, Tcf15, Csnk2a1

omitted Genes: Gm14164, Nrsn2, Sox12

omitted Genes: Zcchc3, 6820408C15Rik, Defb23

omitted Genes: Defb20, Defb22, Defb26

omitted Genes: Defb29, Defb21, Defb19

omitted Genes: Defb45, Defb36, Defb25

omitted Genes: Rem1, H13, Mcts2

omitted Genes: Id1, Cox4i2, Bcl2l1

omitted Genes: Tpx2, Mir5622, Mylk2

omitted Genes: Foxs1, Dusp15, Ccm2l

omitted Genes: Hck, Tm9sf4, Tspyl3

omitted Genes: Pofut1, Kif3b, 2500004C02Rik

omitted Genes: Asxl1, Nol4l, Commd7

omitted Genes: Sun5, Bpifb2, Bpifb6

omitted Genes: Bpifb4, Bpifa6, Bpifa2

omitted Genes: Bpifa3, Bpifa1, Bpifa5

omitted Genes: Bpifb1, Bpifb5, Bpifb9a

omitted Genes: Bpifb9b, Cdk5rap1, Cbfa2t2

omitted Genes: 1700003F12Rik, Pxmp4, Zfp341

omitted Genes: Chmp4b, Raly, Eif2s2

omitted Genes: 2310005A03Rik, Dynlrb1, Map1lc3a

omitted Genes: Mir695, Trp53inp2, Ncapg

omitted Genes: Acss2, Acss2as, Gcs

Make more plots at <http://csg.sph.umich.edu/locuszoom/>

Fine-mapping Regions

| snp            | chr | pos (Mb) | pp        | group        | color  |
|----------------|-----|----------|-----------|--------------|--------|
| chr2:155091628 | 2   | 155.0916 | 0.9998944 | Credible Set | purple |

F39–43 GBS, light dark test, total distance moved from centerpoint

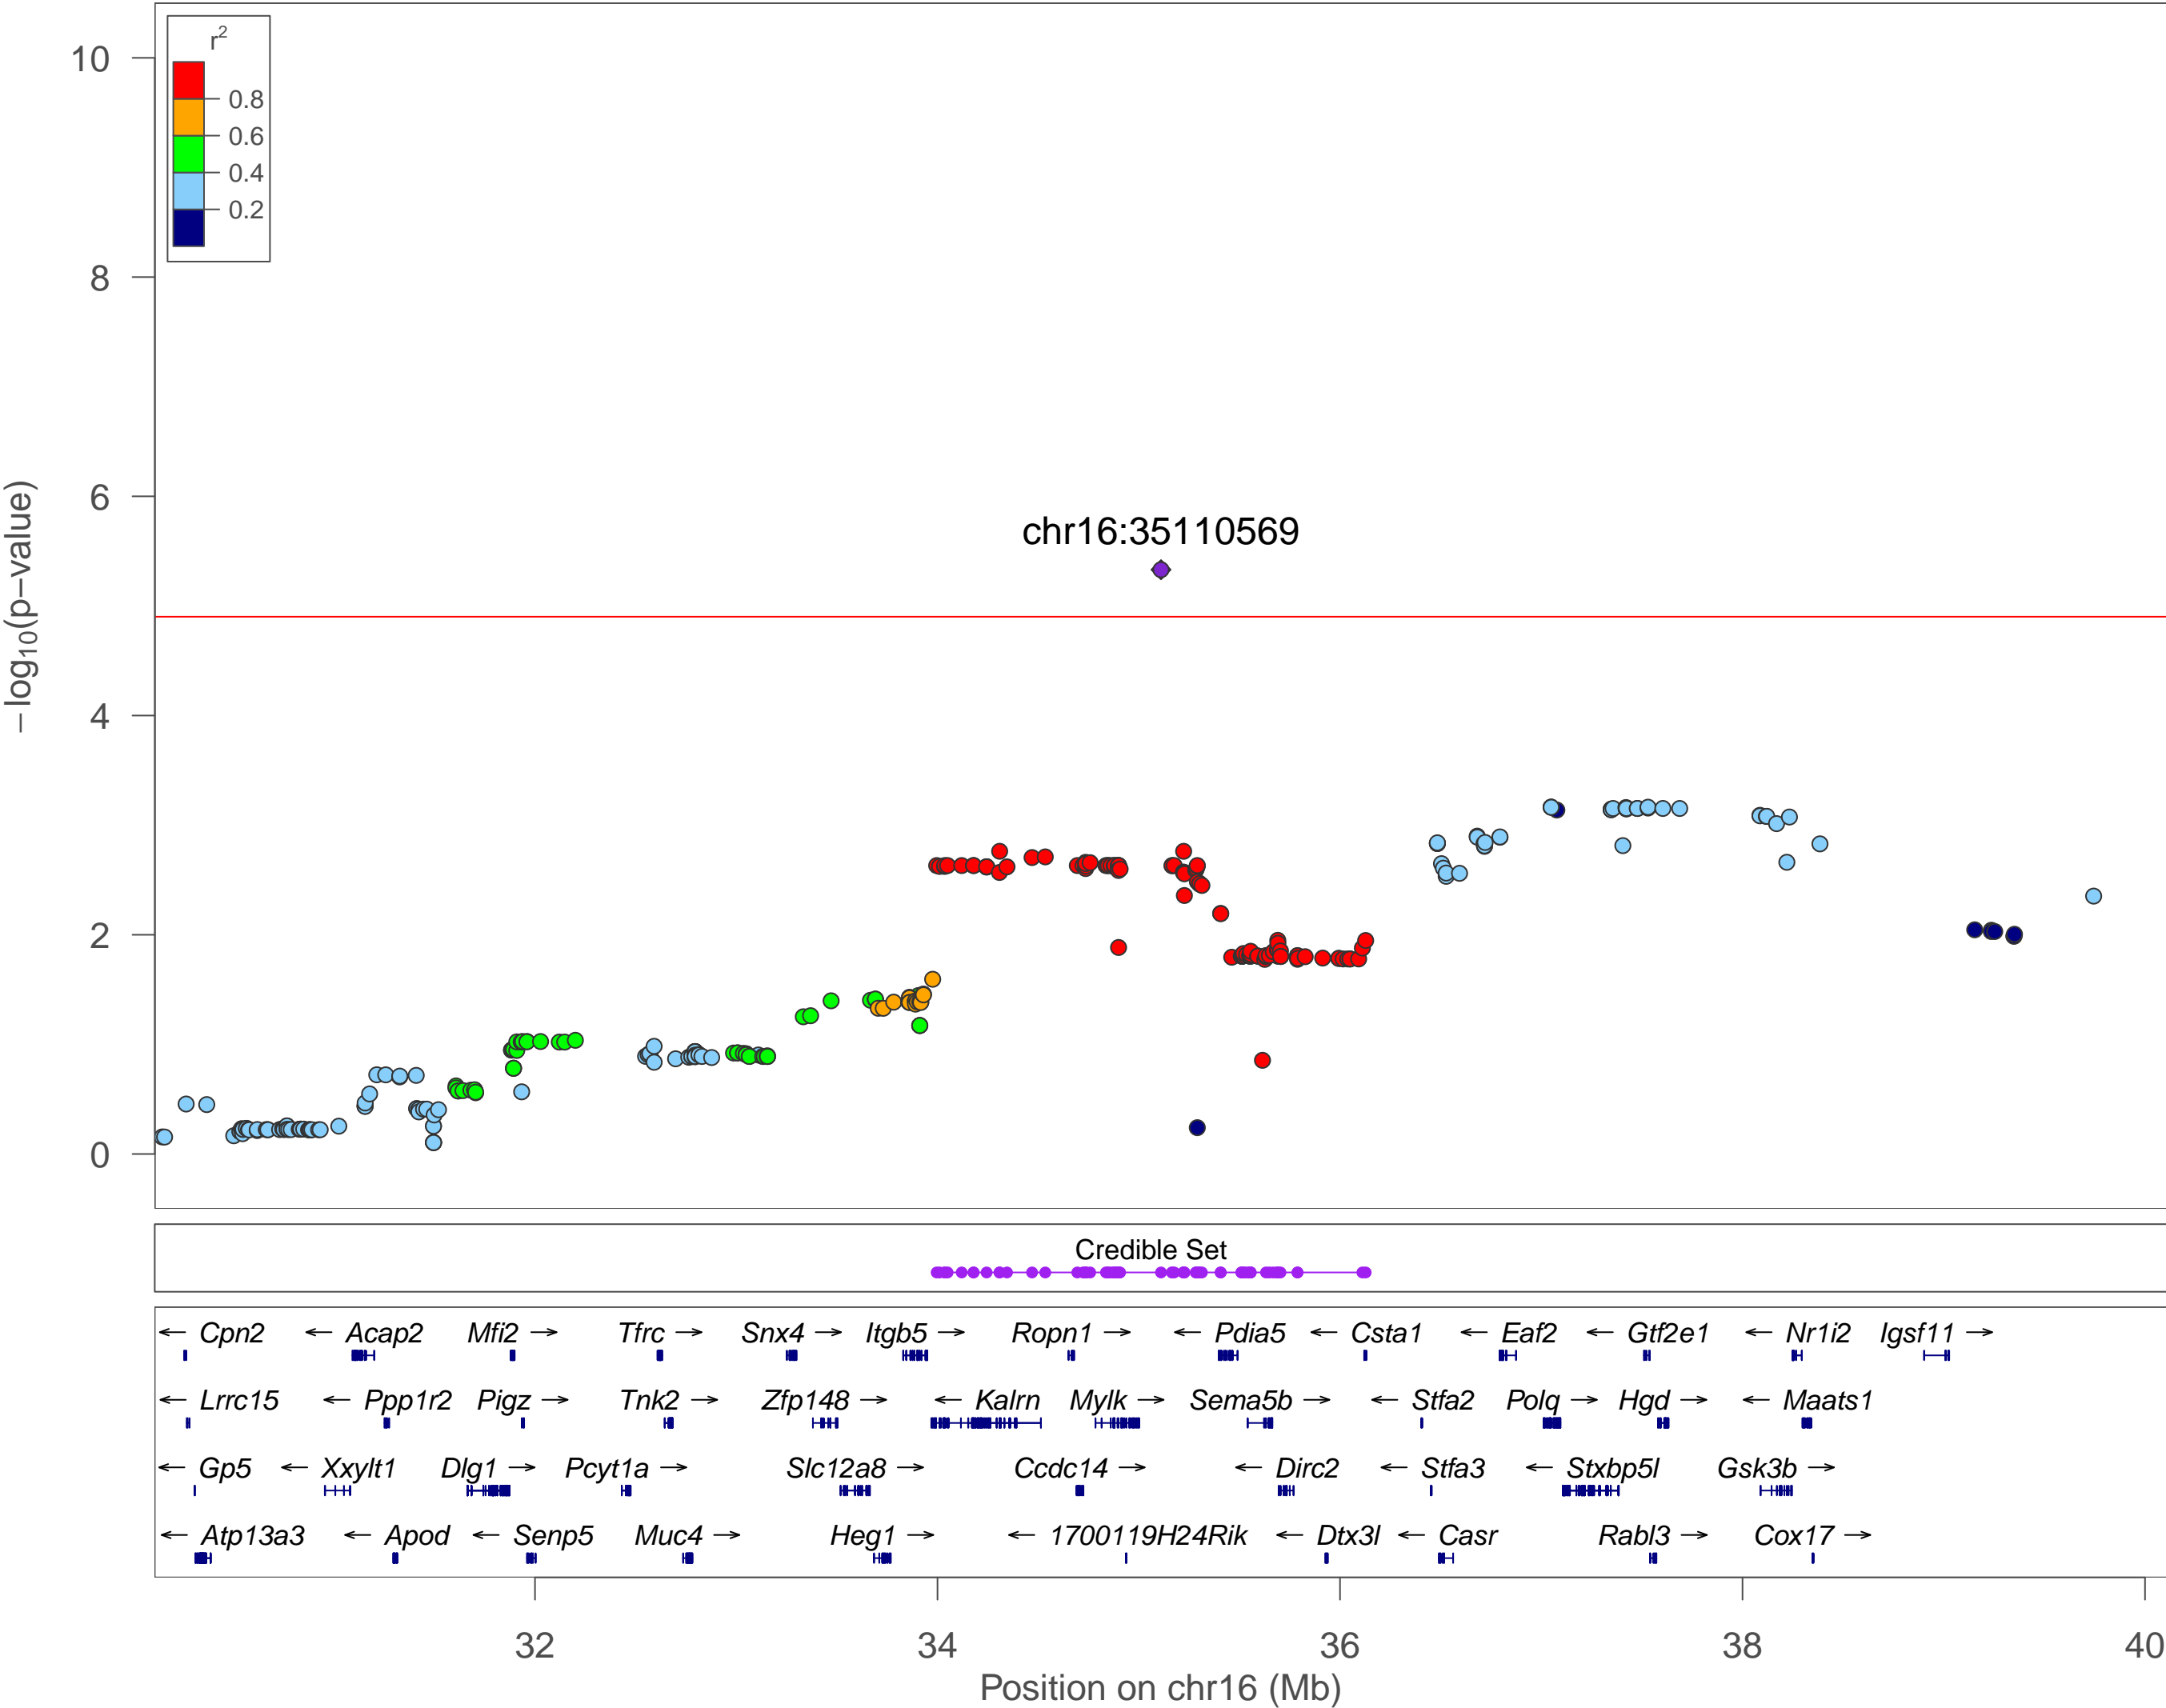



date: Thu Oct 25 17:22:08 2018  
build: F3943GBS  
display range: chr16:30110569–40110569 [30110569–40110569]  
hilite range: 0 – 0 [ 0 – 0 ]  
reference SNP: chr16:35110569  
number of SNPs plotted: 353  
min P-value: 4.67E–6 [chr16:35110569]  
max P-value: 7.87E–1 [chr16:31495890]  
omitted Genes: Tmem44, Lsg1, Fam43a  
omitted Genes: Bdh1, 0610012G03Rik, Ncbp2  
omitted Genes: Gm15694, Pak2, Pigx  
omitted Genes: Cep19, Nrros, Bex6  
omitted Genes: Fbxo45, Wdr53, Mir1946a  
omitted Genes: Smco1, Rnf168, Ubxn7  
omitted Genes: Tm4sf19, Tctex1d2, Slc51a  
omitted Genes: Zdhhc19, Tnk2os, Muc20  
omitted Genes: Gm933, Rubcn, Fyttd1  
omitted Genes: Lrch3, Iqcg, Rpl35a  
omitted Genes: Lmfn, Mir1947, Osbpl11  
omitted Genes: 1700007L15Rik, Muc13, Umps  
omitted Genes: E130310I04Rik, Hacd2, Adcy5  
omitted Genes: Sec22a, 1600019K03Rik, Hspbap1  
omitted Genes: Parp14, Parp9, Kpna1  
omitted Genes: Wdr5b, Fam162a, Ccdc58  
omitted Genes: Stfa2l1, Gm5483, Gm6815  
omitted Genes: Gm5416, 2010005H15Rik, Stfa1  
omitted Genes: BC117090, BC100530, Cd86  
omitted Genes: Ildr1, Slc15a2, Iqcb1  
omitted Genes: 4930565N06Rik, Golgb1, Hcls1  
omitted Genes: Fbxo40, Ndufb4, Fstl1  
omitted Genes: Lrrc58, Gpr156, 4930542C21Rik  
omitted Genes: BC031361, Popdc2, Pla1a  
omitted Genes: Adprh, Cd80, Timmdc1  
omitted Genes: Poglut1, Tmem39a, Arhgap31  
omitted Genes: B4galt4, Upk1b, 4930435E12Rik

## Fine-mapping Regions

| snp            | chr | pos (Mb) | pp           | group        | color  |
|----------------|-----|----------|--------------|--------------|--------|
| chr16:33995903 | 16  | 33.99590 | 0.0024368050 | Credible Set | purple |
| chr16:34010204 | 16  | 34.01020 | 0.0023962077 | Credible Set | purple |
| chr16:34035325 | 16  | 34.03533 | 0.0023962077 | Credible Set | purple |
| chr16:34036026 | 16  | 34.03603 | 0.0024368050 | Credible Set | purple |
| chr16:34050045 | 16  | 34.05004 | 0.0024368050 | Credible Set | purple |
| chr16:34120293 | 16  | 34.12029 | 0.0024368050 | Credible Set | purple |
| chr16:34179072 | 16  | 34.17907 | 0.0024368050 | Credible Set | purple |
| chr16:34179375 | 16  | 34.17938 | 0.0024368050 | Credible Set | purple |
| chr16:34243886 | 16  | 34.24389 | 0.0023809430 | Credible Set | purple |
| chr16:34307872 | 16  | 34.30787 | 0.0021342532 | Credible Set | purple |
| chr16:34308832 | 16  | 34.30883 | 0.0032088489 | Credible Set | purple |
| chr16:34345248 | 16  | 34.34525 | 0.0023771611 | Credible Set | purple |
| chr16:34469856 | 16  | 34.46986 | 0.0028430192 | Credible Set | purple |
| chr16:34535437 | 16  | 34.53544 | 0.0028795529 | Credible Set | purple |
| chr16:34694709 | 16  | 34.69471 | 0.0024368050 | Credible Set | purple |
| chr16:34723432 | 16  | 34.72343 | 0.0024368050 | Credible Set | purple |
| chr16:34736017 | 16  | 34.73602 | 0.0022995103 | Credible Set | purple |
| chr16:34736067 | 16  | 34.73607 | 0.0025934673 | Credible Set | purple |
| chr16:34736543 | 16  | 34.73654 | 0.0024084851 | Credible Set | purple |
| chr16:34736546 | 16  | 34.73655 | 0.0025316505 | Credible Set | purple |
| chr16:34758455 | 16  | 34.75845 | 0.0025754154 | Credible Set | purple |
| chr16:34837044 | 16  | 34.83704 | 0.0024368050 | Credible Set | purple |
| chr16:34845368 | 16  | 34.84537 | 0.0024368050 | Credible Set | purple |
| chr16:34848045 | 16  | 34.84804 | 0.0024368050 | Credible Set | purple |
| chr16:34862374 | 16  | 34.86237 | 0.0024368050 | Credible Set | purple |
| chr16:34878627 | 16  | 34.87863 | 0.0024368050 | Credible Set | purple |
| chr16:34879746 | 16  | 34.87975 | 0.0023766208 | Credible Set | purple |
| chr16:34880408 | 16  | 34.88041 | 0.0024368050 | Credible Set | purple |
| chr16:34880442 | 16  | 34.88044 | 0.0024368050 | Credible Set | purple |
| chr16:34899407 | 16  | 34.89941 | 0.0024368050 | Credible Set | purple |
| chr16:34899479 | 16  | 34.89948 | 0.0024368050 | Credible Set | purple |
| chr16:34899567 | 16  | 34.89957 | 0.0024368050 | Credible Set | purple |
| chr16:34899593 | 16  | 34.89959 | 0.0024319097 | Credible Set | purple |
| chr16:34899645 | 16  | 34.89964 | 0.0024319097 | Credible Set | purple |
| chr16:34899669 | 16  | 34.89967 | 0.0005164153 | Credible Set | purple |
| chr16:34899682 | 16  | 34.89968 | 0.0022494902 | Credible Set | purple |

Fine-mapping Regions

| snp            | chr | pos (Mb) | pp           | group        | color  |
|----------------|-----|----------|--------------|--------------|--------|
| chr16:34899715 | 16  | 34.89972 | 0.0022174086 | Credible Set | purple |
| chr16:34907286 | 16  | 34.90729 | 0.0022782650 | Credible Set | purple |
| chr16:35110569 | 16  | 35.11057 | 0.8469245785 | Credible Set | purple |
| chr16:35165377 | 16  | 35.16538 | 0.0024337472 | Credible Set | purple |
| chr16:35165381 | 16  | 35.16538 | 0.0024337472 | Credible Set | purple |
| chr16:35176099 | 16  | 35.17610 | 0.0024368050 | Credible Set | purple |
| chr16:35222444 | 16  | 35.22244 | 0.0021450546 | Credible Set | purple |
| chr16:35222475 | 16  | 35.22248 | 0.0021450546 | Credible Set | purple |
| chr16:35222947 | 16  | 35.22295 | 0.0021160438 | Credible Set | purple |
| chr16:35223024 | 16  | 35.22302 | 0.0032081124 | Credible Set | purple |
| chr16:35226617 | 16  | 35.22662 | 0.0013740275 | Credible Set | purple |
| chr16:35226697 | 16  | 35.22670 | 0.0020796366 | Credible Set | purple |
| chr16:35282970 | 16  | 35.28297 | 0.0022315710 | Credible Set | purple |
| chr16:35286816 | 16  | 35.28682 | 0.0023115616 | Credible Set | purple |
| chr16:35290682 | 16  | 35.29068 | 0.0024184026 | Credible Set | purple |
| chr16:35290929 | 16  | 35.29093 | 0.0024368050 | Credible Set | purple |
| chr16:35291606 | 16  | 35.29161 | 0.0017806385 | Credible Set | purple |
| chr16:35301999 | 16  | 35.30200 | 0.0017074395 | Credible Set | purple |
| chr16:35303186 | 16  | 35.30319 | 0.0017229572 | Credible Set | purple |
| chr16:35313747 | 16  | 35.31375 | 0.0016643743 | Credible Set | purple |
| chr16:35406924 | 16  | 35.40692 | 0.0009783719 | Credible Set | purple |
| chr16:35407400 | 16  | 35.40740 | 0.0009728870 | Credible Set | purple |
| chr16:35509375 | 16  | 35.50937 | 0.0004403027 | Credible Set | purple |
| chr16:35512153 | 16  | 35.51215 | 0.0004403027 | Credible Set | purple |
| chr16:35514329 | 16  | 35.51433 | 0.0004403027 | Credible Set | purple |
| chr16:35514333 | 16  | 35.51433 | 0.0004403027 | Credible Set | purple |
| chr16:35514335 | 16  | 35.51434 | 0.0004403027 | Credible Set | purple |
| chr16:35514337 | 16  | 35.51434 | 0.0004403027 | Credible Set | purple |
| chr16:35519320 | 16  | 35.51932 | 0.0004440990 | Credible Set | purple |
| chr16:35520175 | 16  | 35.52018 | 0.0004616747 | Credible Set | purple |
| chr16:35535811 | 16  | 35.53581 | 0.0004527721 | Credible Set | purple |
| chr16:35552316 | 16  | 35.55232 | 0.0004454180 | Credible Set | purple |
| chr16:35552393 | 16  | 35.55239 | 0.0004475908 | Credible Set | purple |
| chr16:35552802 | 16  | 35.55280 | 0.0004429417 | Credible Set | purple |
| chr16:35554979 | 16  | 35.55498 | 0.0004531593 | Credible Set | purple |
| chr16:35555052 | 16  | 35.55505 | 0.0004513451 | Credible Set | purple |

Fine-mapping Regions

| snp            | chr | pos (Mb) | pp           | group        | color  |
|----------------|-----|----------|--------------|--------------|--------|
| chr16:35555962 | 16  | 35.55596 | 0.0004550084 | Credible Set | purple |
| chr16:35555964 | 16  | 35.55596 | 0.0004815372 | Credible Set | purple |
| chr16:35632372 | 16  | 35.63237 | 0.0004447240 | Credible Set | purple |
| chr16:35648933 | 16  | 35.64893 | 0.0004452547 | Credible Set | purple |
| chr16:35668489 | 16  | 35.66849 | 0.0004763965 | Credible Set | purple |
| chr16:35688514 | 16  | 35.68851 | 0.0004971362 | Credible Set | purple |
| chr16:35690798 | 16  | 35.69080 | 0.0005898687 | Credible Set | purple |
| chr16:35691243 | 16  | 35.69124 | 0.0004954077 | Credible Set | purple |
| chr16:35691297 | 16  | 35.69130 | 0.0005585339 | Credible Set | purple |
| chr16:35704080 | 16  | 35.70408 | 0.0004846041 | Credible Set | purple |
| chr16:35788676 | 16  | 35.78868 | 0.0004442823 | Credible Set | purple |
| chr16:35789020 | 16  | 35.78902 | 0.0004427413 | Credible Set | purple |
| chr16:36111216 | 16  | 36.11122 | 0.0005108505 | Credible Set | purple |
| chr16:36127401 | 16  | 36.12740 | 0.0005881521 | Credible Set | purple |

F39–43 GBS, light dark test, transition frequency at center point

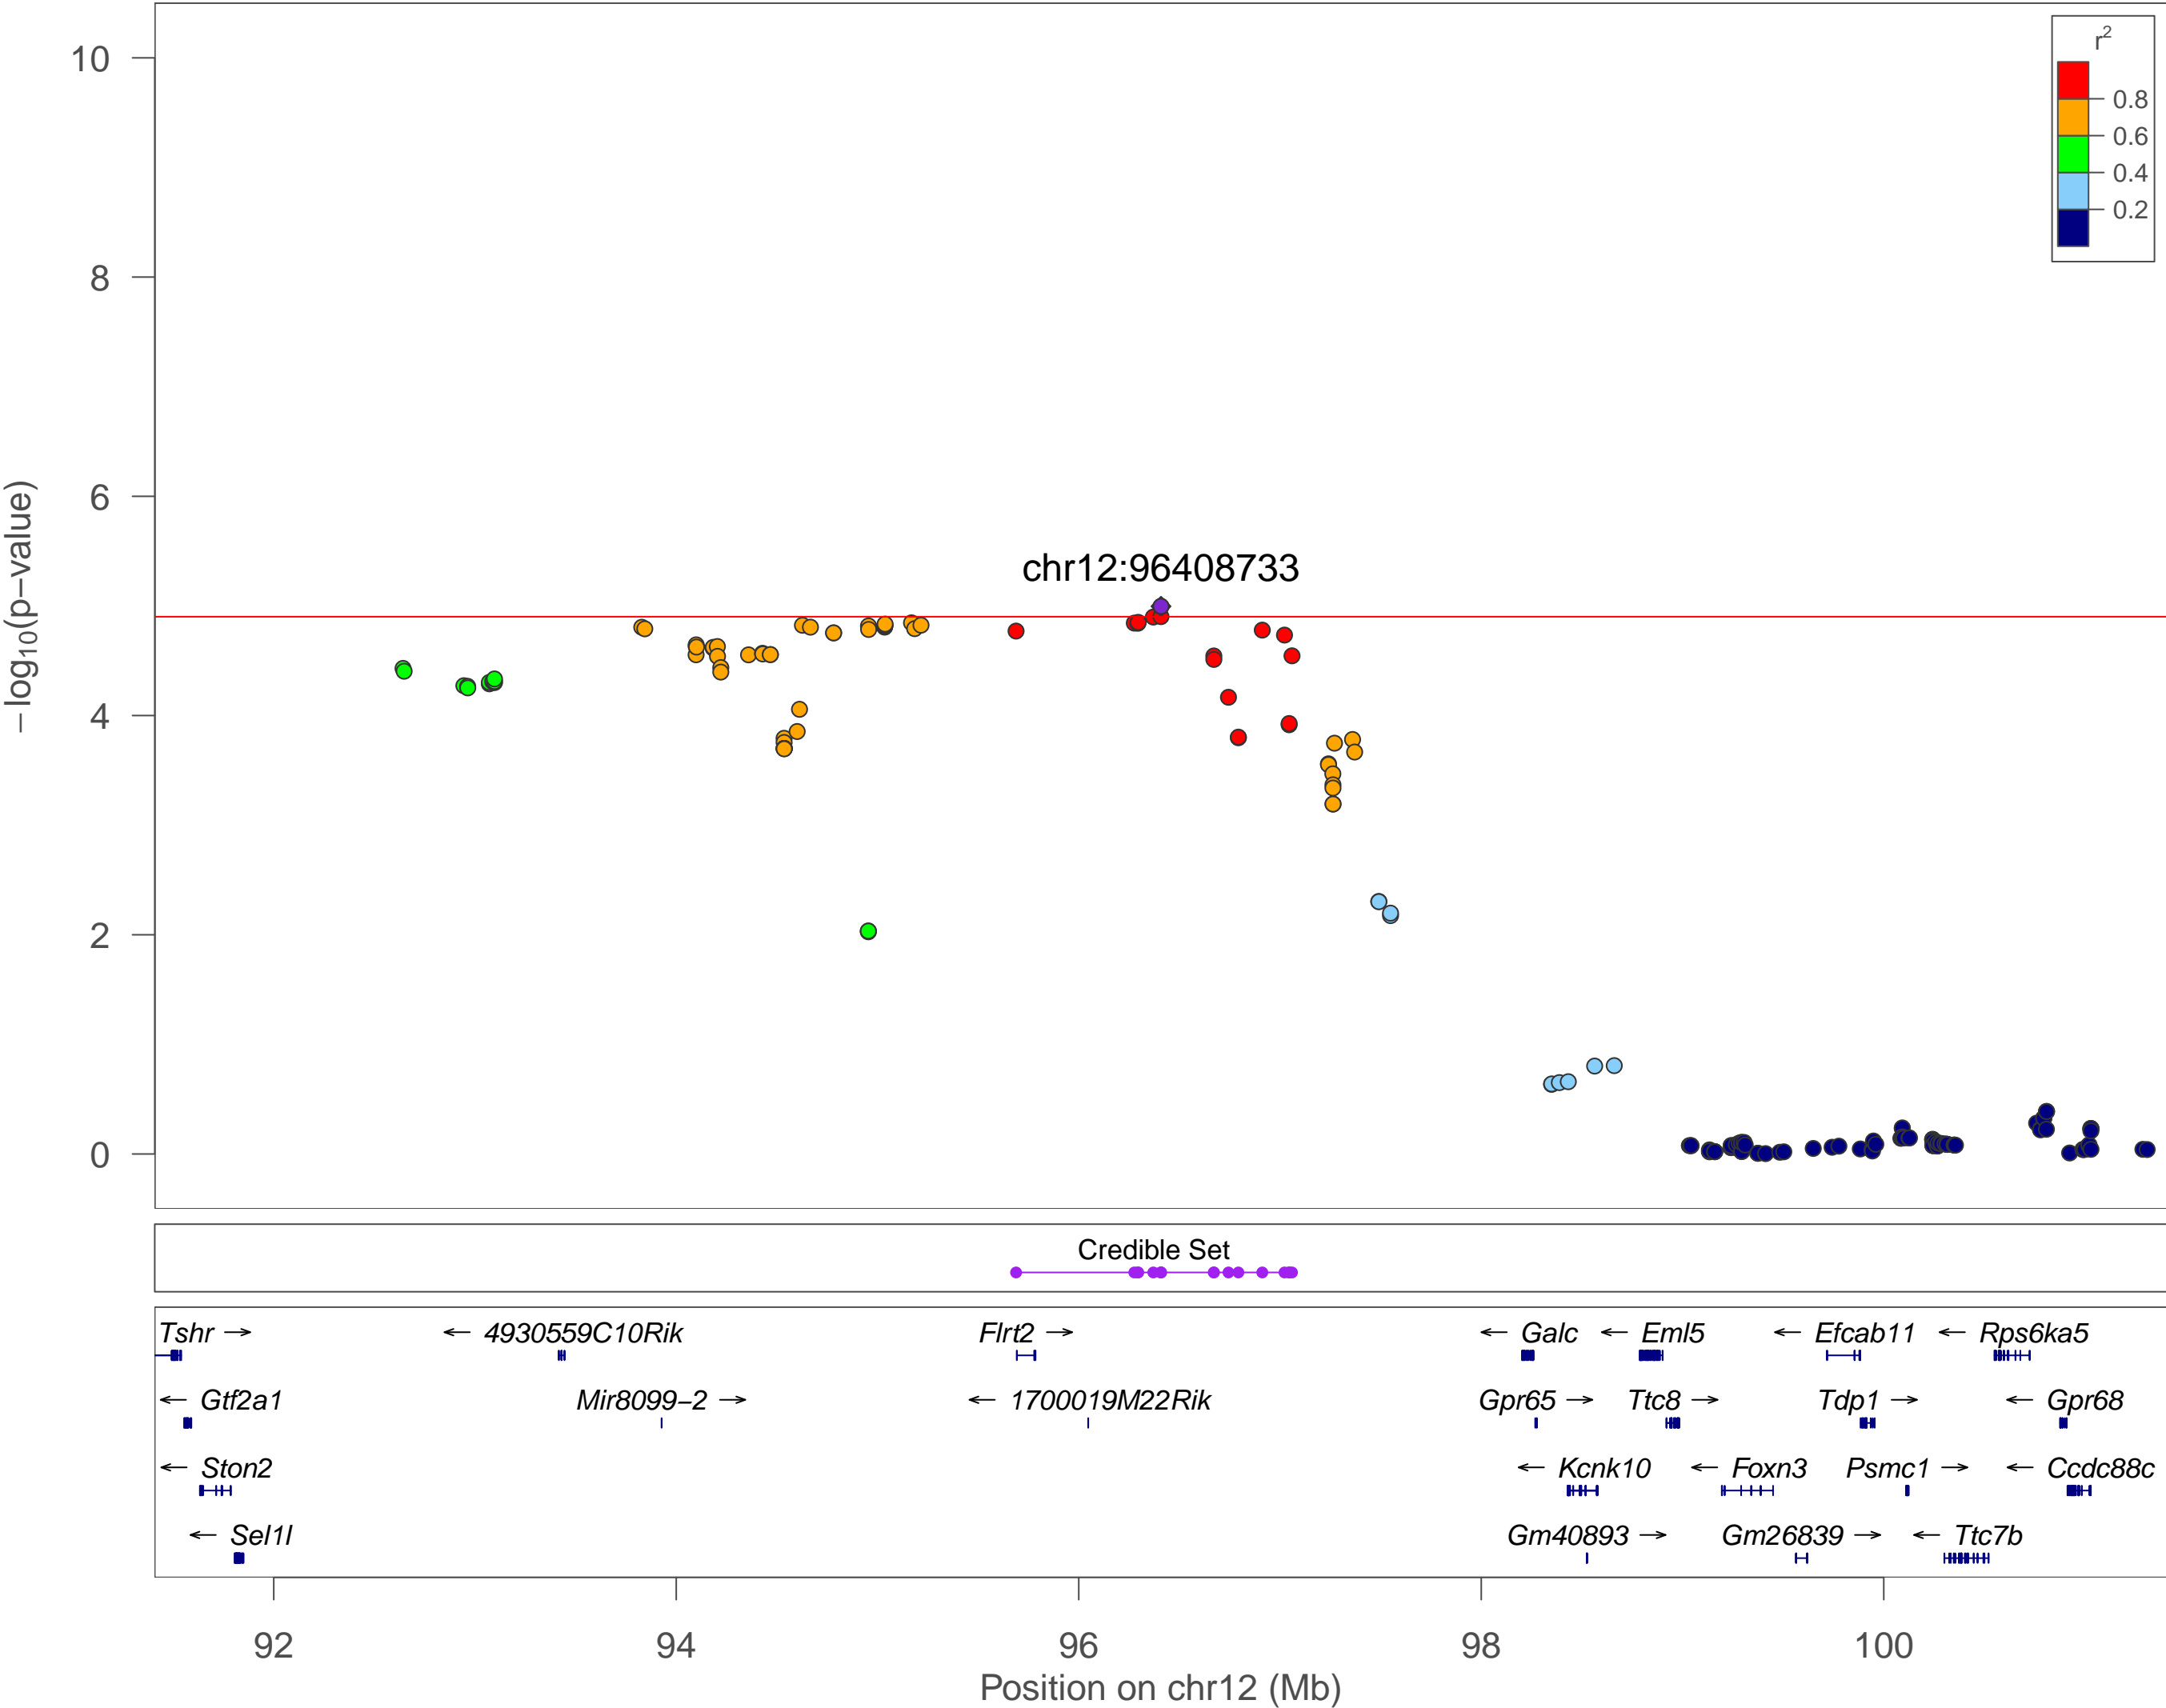

date: Thu Oct 25 17:22:18 2018

build: F3943GBS

display range: chr12:91408733–101408733 [91408733–101408733]

hilite range: 0 – 0 [ 0 – 0 ]

reference SNP: chr12:96408733

number of SNPs plotted: 187

min P-value: 1.01E–5 [chr12:96408733]

max P-value: 9.91E–1 [chr12:99412684]

omitted Genes: Spata7, Ptpn21, Zc3h14

omitted Genes: 4930474N09Rik, 1700064M15Rik, Kcnk13

omitted Genes: Nrde2, Gm10433, Calm1

omitted Genes: Gm10432, 9030617O03Rik, Mir1190

omitted Genes: Smek1, D130020L05Rik, Kif4-ps

omitted Genes: Catsperb

Fine-mapping Regions

| snp            | chr | pos (Mb) | pp          | group        | color  |
|----------------|-----|----------|-------------|--------------|--------|
| chr12:95688559 | 12  | 95.68856 | 0.066583928 | Credible Set | purple |
| chr12:96276115 | 12  | 96.27612 | 0.078063741 | Credible Set | purple |
| chr12:96293767 | 12  | 96.29377 | 0.077868747 | Credible Set | purple |
| chr12:96295488 | 12  | 96.29549 | 0.079269278 | Credible Set | purple |
| chr12:96370579 | 12  | 96.37058 | 0.088151618 | Credible Set | purple |
| chr12:96408510 | 12  | 96.40851 | 0.088922195 | Credible Set | purple |
| chr12:96408667 | 12  | 96.40867 | 0.109049512 | Credible Set | purple |
| chr12:96408733 | 12  | 96.40873 | 0.109283651 | Credible Set | purple |
| chr12:96671267 | 12  | 96.67127 | 0.040480551 | Credible Set | purple |
| chr12:96671328 | 12  | 96.67133 | 0.037775520 | Credible Set | purple |
| chr12:96743964 | 12  | 96.74396 | 0.017774380 | Credible Set | purple |
| chr12:96793184 | 12  | 96.79318 | 0.008065971 | Credible Set | purple |
| chr12:96912045 | 12  | 96.91205 | 0.067868114 | Credible Set | purple |
| chr12:97022371 | 12  | 97.02237 | 0.061429753 | Credible Set | purple |
| chr12:97045366 | 12  | 97.04537 | 0.010299811 | Credible Set | purple |
| chr12:97045367 | 12  | 97.04537 | 0.010556824 | Credible Set | purple |
| chr12:97059616 | 12  | 97.05962 | 0.040591987 | Credible Set | purple |

F39–43 GBS, light dark test, duration spent in zone light center point

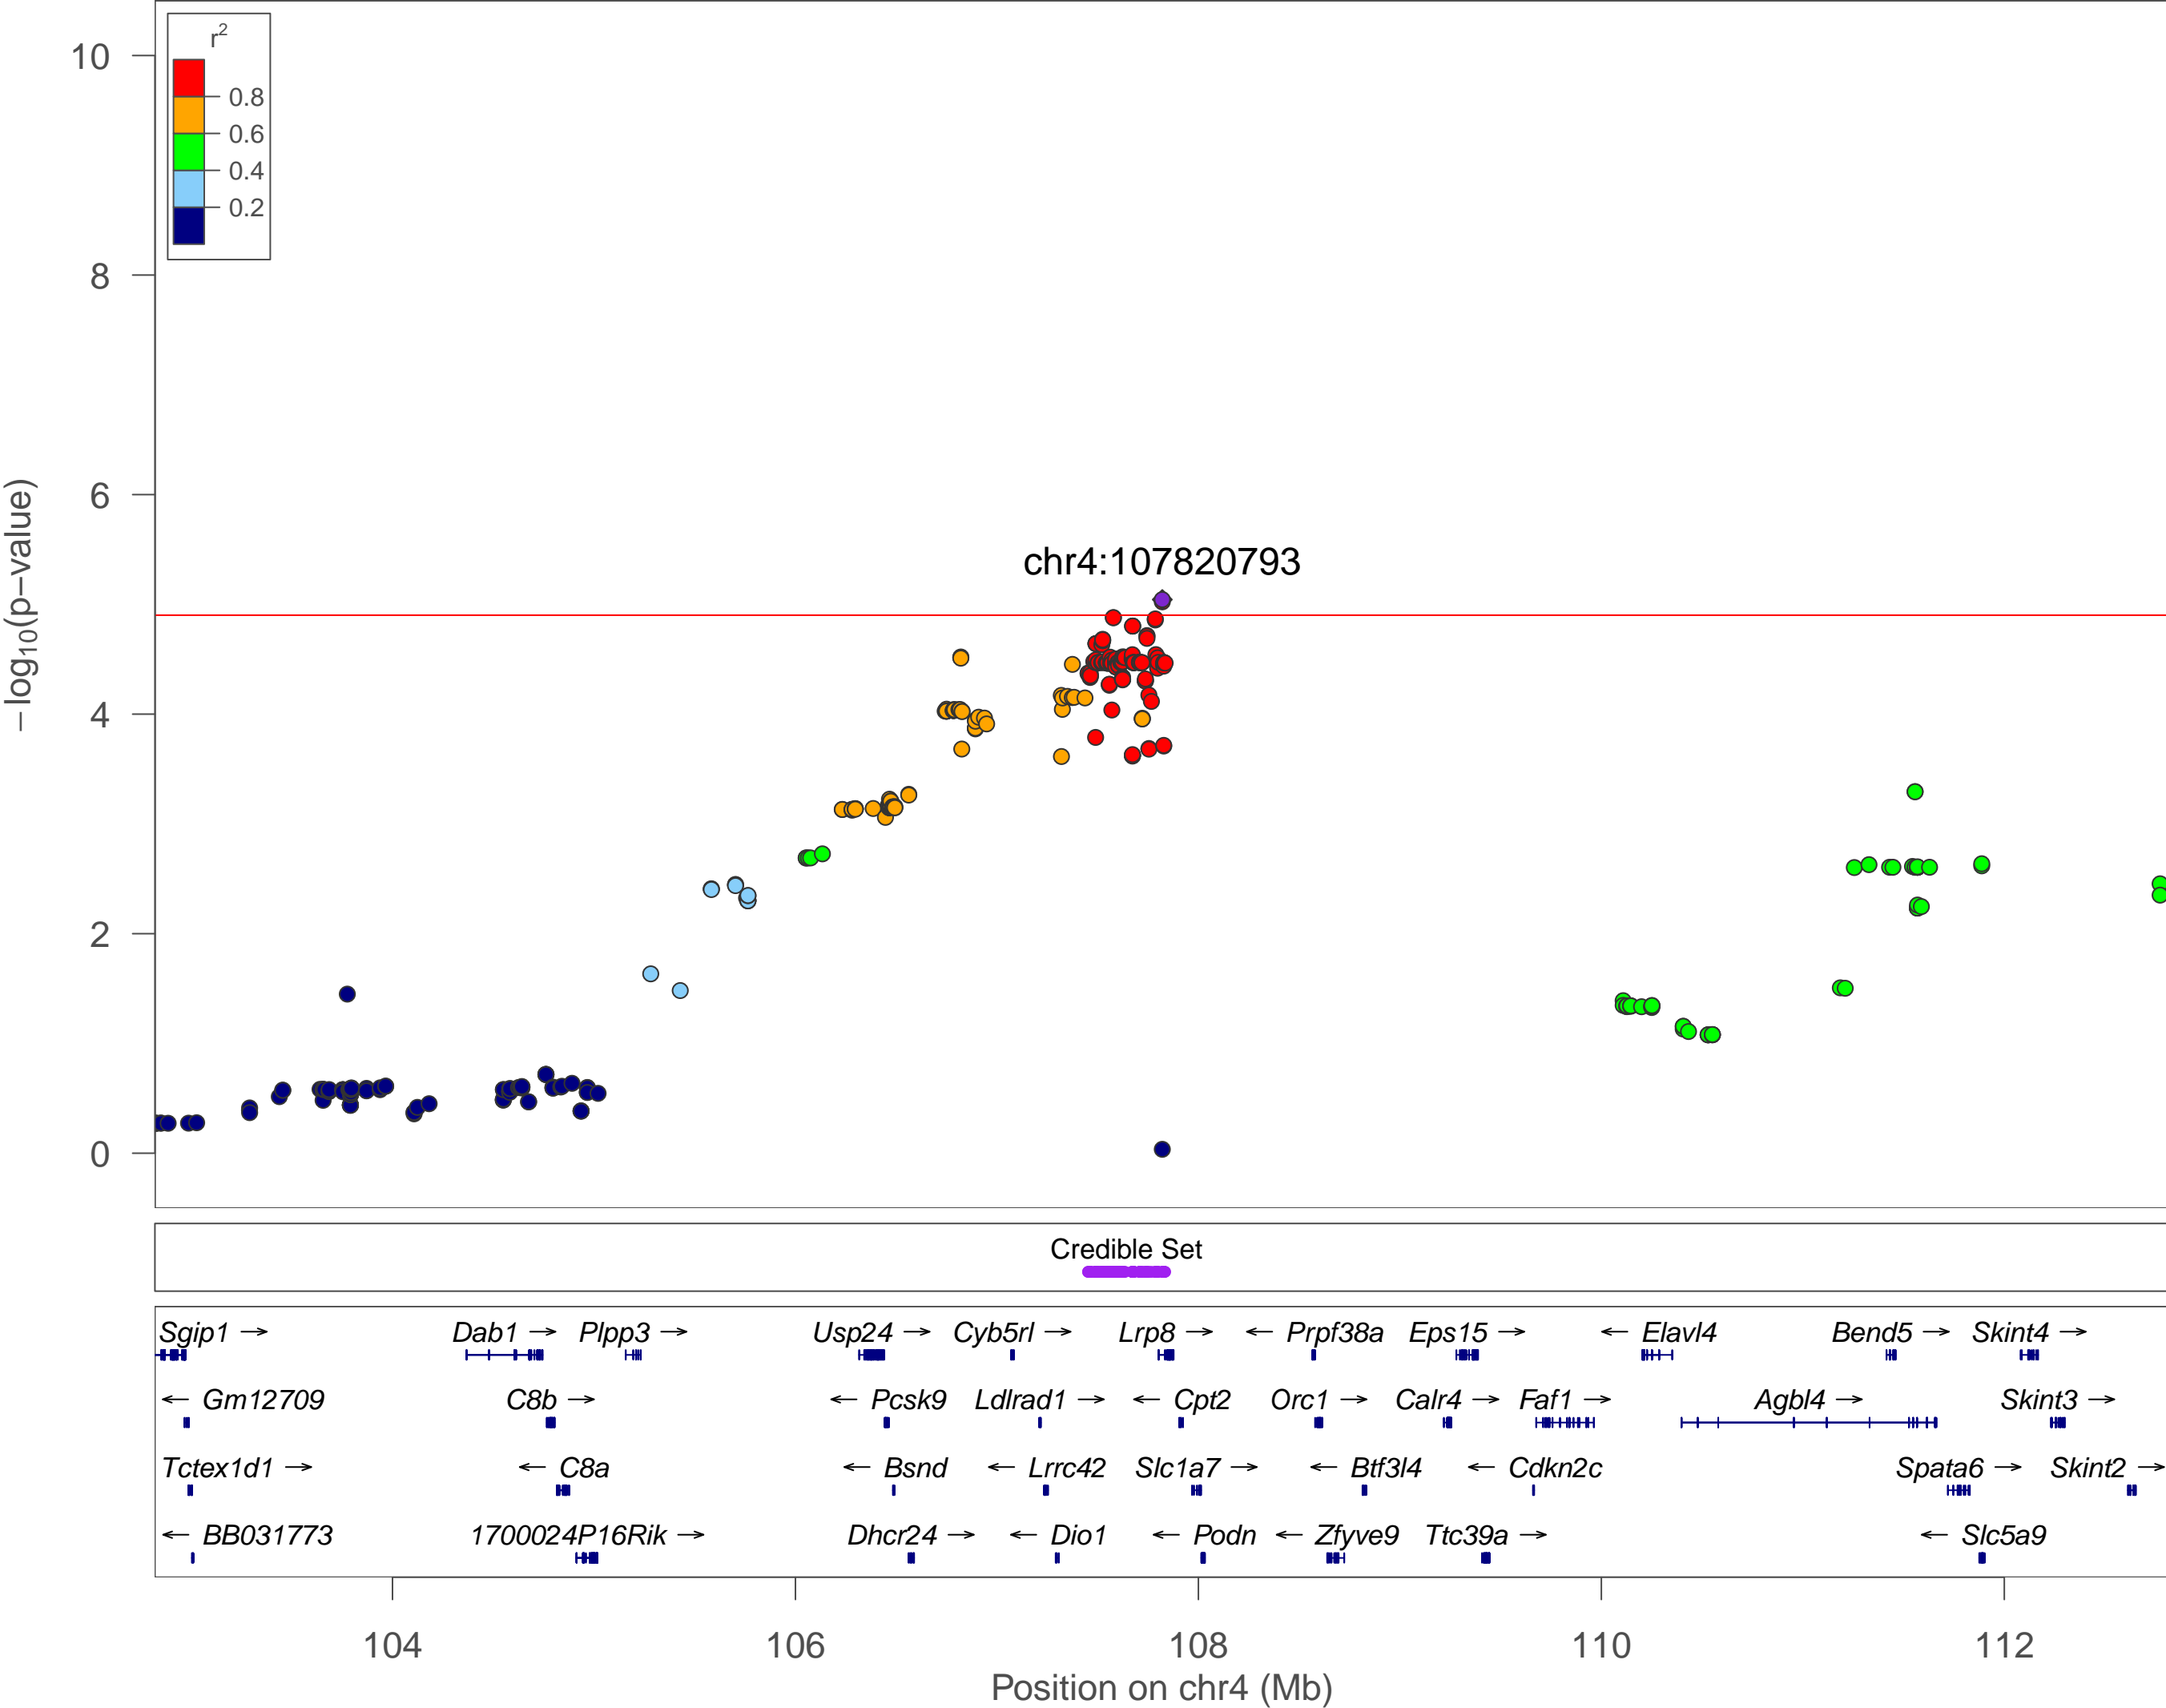



date: Thu Oct 25 17:22:26 2018  
build: F3943GBS  
display range: chr4:102820793–112820793 [102820793–112820793]  
hilite range: 0 – 0 [ 0 – 0 ]  
reference SNP: chr4:107820793  
number of SNPs plotted: 382  
min P-value: 9.04E–6 [chr4:107820793]  
max P-value: 9.21E–1 [chr4:107820753]  
omitted Genes: Insl5, Wdr78, Mier1  
omitted Genes: Slc35d1, 4921539E11Rik, 4930456L15Rik  
omitted Genes: Oma1, Gm12718, Prkaa2  
omitted Genes: Lexm, Ttc22, Pars2  
omitted Genes: Ttc4, Mroh7, Fam151a  
omitted Genes: Acot11, Ssbp3, Mrpl37  
omitted Genes: Cdcp2, Tceanc2, Tmem59  
omitted Genes: Hspb11, Yipf1, Ndc1  
omitted Genes: Glis1, Dmrtb1, Magoh  
omitted Genes: 0610037L13Rik, 4930407G08Rik, Scp2  
omitted Genes: Mir6397, Echdc2, Zyg11a  
omitted Genes: Zyg11b, Coa7, Fam159a  
omitted Genes: Gpx7, Zcchc11, Cc2d1b  
omitted Genes: Txndc12, Kti12, Rab3b  
omitted Genes: 8030443G20Rik, Nrd1, Mir761  
omitted Genes: Osbp19, Ttc39aos1, Rnf11  
omitted Genes: 4930522H14Rik, Dmrta2, Skint8  
omitted Genes: Skint7, Skint1, Skint9  
omitted Genes: Skint10, Skint6

## Fine-mapping Regions

| snp            | chr | pos (Mb) | pp          | group        | color  |
|----------------|-----|----------|-------------|--------------|--------|
| chr4:107452487 | 4   | 107.4525 | 0.006139849 | Credible Set | purple |
| chr4:107452522 | 4   | 107.4525 | 0.006210446 | Credible Set | purple |
| chr4:107460844 | 4   | 107.4608 | 0.005884823 | Credible Set | purple |
| chr4:107462435 | 4   | 107.4624 | 0.005929123 | Credible Set | purple |
| chr4:107462443 | 4   | 107.4624 | 0.005685471 | Credible Set | purple |
| chr4:107462966 | 4   | 107.4630 | 0.005927923 | Credible Set | purple |
| chr4:107463057 | 4   | 107.4631 | 0.006242026 | Credible Set | purple |
| chr4:107463550 | 4   | 107.4635 | 0.005804363 | Credible Set | purple |
| chr4:107463697 | 4   | 107.4637 | 0.005890754 | Credible Set | purple |
| chr4:107480817 | 4   | 107.4808 | 0.007801357 | Credible Set | purple |
| chr4:107489799 | 4   | 107.4898 | 0.001733295 | Credible Set | purple |
| chr4:107489889 | 4   | 107.4899 | 0.007645256 | Credible Set | purple |
| chr4:107491410 | 4   | 107.4914 | 0.008082270 | Credible Set | purple |
| chr4:107491522 | 4   | 107.4915 | 0.011163287 | Credible Set | purple |
| chr4:107491535 | 4   | 107.4915 | 0.011163287 | Credible Set | purple |
| chr4:107491555 | 4   | 107.4916 | 0.011163287 | Credible Set | purple |
| chr4:107502298 | 4   | 107.5023 | 0.007645256 | Credible Set | purple |
| chr4:107502806 | 4   | 107.5028 | 0.007645256 | Credible Set | purple |
| chr4:107502862 | 4   | 107.5029 | 0.007645256 | Credible Set | purple |
| chr4:107519045 | 4   | 107.5190 | 0.007645256 | Credible Set | purple |
| chr4:107520793 | 4   | 107.5208 | 0.010952576 | Credible Set | purple |
| chr4:107524390 | 4   | 107.5244 | 0.007655839 | Credible Set | purple |
| chr4:107524399 | 4   | 107.5244 | 0.007748733 | Credible Set | purple |
| chr4:107524747 | 4   | 107.5247 | 0.011850794 | Credible Set | purple |
| chr4:107524800 | 4   | 107.5248 | 0.012169599 | Credible Set | purple |
| chr4:107524808 | 4   | 107.5248 | 0.011839126 | Credible Set | purple |
| chr4:107524812 | 4   | 107.5248 | 0.012062379 | Credible Set | purple |
| chr4:107542864 | 4   | 107.5429 | 0.007645256 | Credible Set | purple |
| chr4:107543088 | 4   | 107.5431 | 0.007645256 | Credible Set | purple |
| chr4:107543347 | 4   | 107.5433 | 0.007621806 | Credible Set | purple |
| chr4:107548442 | 4   | 107.5484 | 0.007645256 | Credible Set | purple |
| chr4:107550049 | 4   | 107.5500 | 0.007539375 | Credible Set | purple |
| chr4:107550052 | 4   | 107.5501 | 0.007542804 | Credible Set | purple |
| chr4:107550153 | 4   | 107.5502 | 0.007645256 | Credible Set | purple |
| chr4:107558047 | 4   | 107.5580 | 0.004953255 | Credible Set | purple |
| chr4:107558061 | 4   | 107.5581 | 0.004872070 | Credible Set | purple |

## Fine-mapping Regions

| snp            | chr | pos (Mb) | pp          | group        | color  |
|----------------|-----|----------|-------------|--------------|--------|
| chr4:107558064 | 4   | 107.5581 | 0.004970102 | Credible Set | purple |
| chr4:107561625 | 4   | 107.5616 | 0.008519314 | Credible Set | purple |
| chr4:107563786 | 4   | 107.5638 | 0.007555548 | Credible Set | purple |
| chr4:107570421 | 4   | 107.5704 | 0.002980557 | Credible Set | purple |
| chr4:107570446 | 4   | 107.5704 | 0.008029709 | Credible Set | purple |
| chr4:107570783 | 4   | 107.5708 | 0.007555548 | Credible Set | purple |
| chr4:107578001 | 4   | 107.5780 | 0.018747346 | Credible Set | purple |
| chr4:107578013 | 4   | 107.5780 | 0.018747346 | Credible Set | purple |
| chr4:107589309 | 4   | 107.5893 | 0.007588680 | Credible Set | purple |
| chr4:107589365 | 4   | 107.5894 | 0.007564067 | Credible Set | purple |
| chr4:107589847 | 4   | 107.5898 | 0.007645256 | Credible Set | purple |
| chr4:107589899 | 4   | 107.5899 | 0.007645256 | Credible Set | purple |
| chr4:107590217 | 4   | 107.5902 | 0.007645256 | Credible Set | purple |
| chr4:107590304 | 4   | 107.5903 | 0.008225228 | Credible Set | purple |
| chr4:107590311 | 4   | 107.5903 | 0.008113060 | Credible Set | purple |
| chr4:107590318 | 4   | 107.5903 | 0.008204375 | Credible Set | purple |
| chr4:107590777 | 4   | 107.5908 | 0.007038290 | Credible Set | purple |
| chr4:107590782 | 4   | 107.5908 | 0.006994323 | Credible Set | purple |
| chr4:107590825 | 4   | 107.5908 | 0.007016611 | Credible Set | purple |
| chr4:107601123 | 4   | 107.6011 | 0.007645256 | Credible Set | purple |
| chr4:107601170 | 4   | 107.6012 | 0.007645256 | Credible Set | purple |
| chr4:107602251 | 4   | 107.6023 | 0.007541042 | Credible Set | purple |
| chr4:107603006 | 4   | 107.6030 | 0.007645256 | Credible Set | purple |
| chr4:107603359 | 4   | 107.6034 | 0.007217989 | Credible Set | purple |
| chr4:107603395 | 4   | 107.6034 | 0.007240987 | Credible Set | purple |
| chr4:107614922 | 4   | 107.6149 | 0.007645256 | Credible Set | purple |
| chr4:107619675 | 4   | 107.6197 | 0.007645256 | Credible Set | purple |
| chr4:107619763 | 4   | 107.6198 | 0.007756452 | Credible Set | purple |
| chr4:107623179 | 4   | 107.6232 | 0.007761225 | Credible Set | purple |
| chr4:107623470 | 4   | 107.6235 | 0.005729825 | Credible Set | purple |
| chr4:107623488 | 4   | 107.6235 | 0.005554516 | Credible Set | purple |
| chr4:107623496 | 4   | 107.6235 | 0.005426062 | Credible Set | purple |
| chr4:107623506 | 4   | 107.6235 | 0.005517344 | Credible Set | purple |
| chr4:107623515 | 4   | 107.6235 | 0.005488297 | Credible Set | purple |
| chr4:107623565 | 4   | 107.6236 | 0.007779348 | Credible Set | purple |
| chr4:107623613 | 4   | 107.6236 | 0.008569345 | Credible Set | purple |

## Fine-mapping Regions

| snp            | chr | pos (Mb) | pp          | group        | color  |
|----------------|-----|----------|-------------|--------------|--------|
| chr4:107624024 | 4   | 107.6240 | 0.005470502 | Credible Set | purple |
| chr4:107630955 | 4   | 107.6310 | 0.008527009 | Credible Set | purple |
| chr4:107636029 | 4   | 107.6360 | 0.008427555 | Credible Set | purple |
| chr4:107671009 | 4   | 107.6710 | 0.008181240 | Credible Set | purple |
| chr4:107671349 | 4   | 107.6713 | 0.008547164 | Credible Set | purple |
| chr4:107672292 | 4   | 107.6723 | 0.008584331 | Credible Set | purple |
| chr4:107672310 | 4   | 107.6723 | 0.008491017 | Credible Set | purple |
| chr4:107672333 | 4   | 107.6723 | 0.008952812 | Credible Set | purple |
| chr4:107673647 | 4   | 107.6736 | 0.015849244 | Credible Set | purple |
| chr4:107673650 | 4   | 107.6736 | 0.015849244 | Credible Set | purple |
| chr4:107673669 | 4   | 107.6737 | 0.015849244 | Credible Set | purple |
| chr4:107676434 | 4   | 107.6764 | 0.007645256 | Credible Set | purple |
| chr4:107677045 | 4   | 107.6770 | 0.007645256 | Credible Set | purple |
| chr4:107677381 | 4   | 107.6774 | 0.007645256 | Credible Set | purple |
| chr4:107680225 | 4   | 107.6802 | 0.007645256 | Credible Set | purple |
| chr4:107681615 | 4   | 107.6816 | 0.007645256 | Credible Set | purple |
| chr4:107707410 | 4   | 107.7074 | 0.007735884 | Credible Set | purple |
| chr4:107707549 | 4   | 107.7075 | 0.007645256 | Credible Set | purple |
| chr4:107707574 | 4   | 107.7076 | 0.007645256 | Credible Set | purple |
| chr4:107710876 | 4   | 107.7109 | 0.007645256 | Credible Set | purple |
| chr4:107719853 | 4   | 107.7199 | 0.007645256 | Credible Set | purple |
| chr4:107719899 | 4   | 107.7199 | 0.007645256 | Credible Set | purple |
| chr4:107736672 | 4   | 107.7367 | 0.005306097 | Credible Set | purple |
| chr4:107737167 | 4   | 107.7372 | 0.005521127 | Credible Set | purple |
| chr4:107744658 | 4   | 107.7447 | 0.013103814 | Credible Set | purple |
| chr4:107744663 | 4   | 107.7447 | 0.012946291 | Credible Set | purple |
| chr4:107744682 | 4   | 107.7447 | 0.012392523 | Credible Set | purple |
| chr4:107754250 | 4   | 107.7542 | 0.004010015 | Credible Set | purple |
| chr4:107766842 | 4   | 107.7668 | 0.003532624 | Credible Set | purple |
| chr4:107785888 | 4   | 107.7859 | 0.017900074 | Credible Set | purple |
| chr4:107785926 | 4   | 107.7859 | 0.018294844 | Credible Set | purple |
| chr4:107789013 | 4   | 107.7890 | 0.008962432 | Credible Set | purple |
| chr4:107797328 | 4   | 107.7973 | 0.006837035 | Credible Set | purple |
| chr4:107797813 | 4   | 107.7978 | 0.008409549 | Credible Set | purple |
| chr4:107800894 | 4   | 107.8009 | 0.007680796 | Credible Set | purple |
| chr4:107820793 | 4   | 107.8208 | 0.026928760 | Credible Set | purple |

Fine-mapping Regions

| snp            | chr | pos (Mb) | pp          | group        | color  |
|----------------|-----|----------|-------------|--------------|--------|
| chr4:107820800 | 4   | 107.8208 | 0.025762219 | Credible Set | purple |
| chr4:107827933 | 4   | 107.8279 | 0.001462287 | Credible Set | purple |
| chr4:107827937 | 4   | 107.8279 | 0.001481504 | Credible Set | purple |
| chr4:107827946 | 4   | 107.8279 | 0.007385856 | Credible Set | purple |
| chr4:107828049 | 4   | 107.8280 | 0.007124388 | Credible Set | purple |
| chr4:107828736 | 4   | 107.8287 | 0.007645256 | Credible Set | purple |
| chr4:107828810 | 4   | 107.8288 | 0.007645256 | Credible Set | purple |
| chr4:107828843 | 4   | 107.8288 | 0.007645256 | Credible Set | purple |
| chr4:107828858 | 4   | 107.8289 | 0.007645256 | Credible Set | purple |
| chr4:107834883 | 4   | 107.8349 | 0.007575529 | Credible Set | purple |

# F39–43 GBS, locomotor test day 2, total distance travelled in 30min (cm)

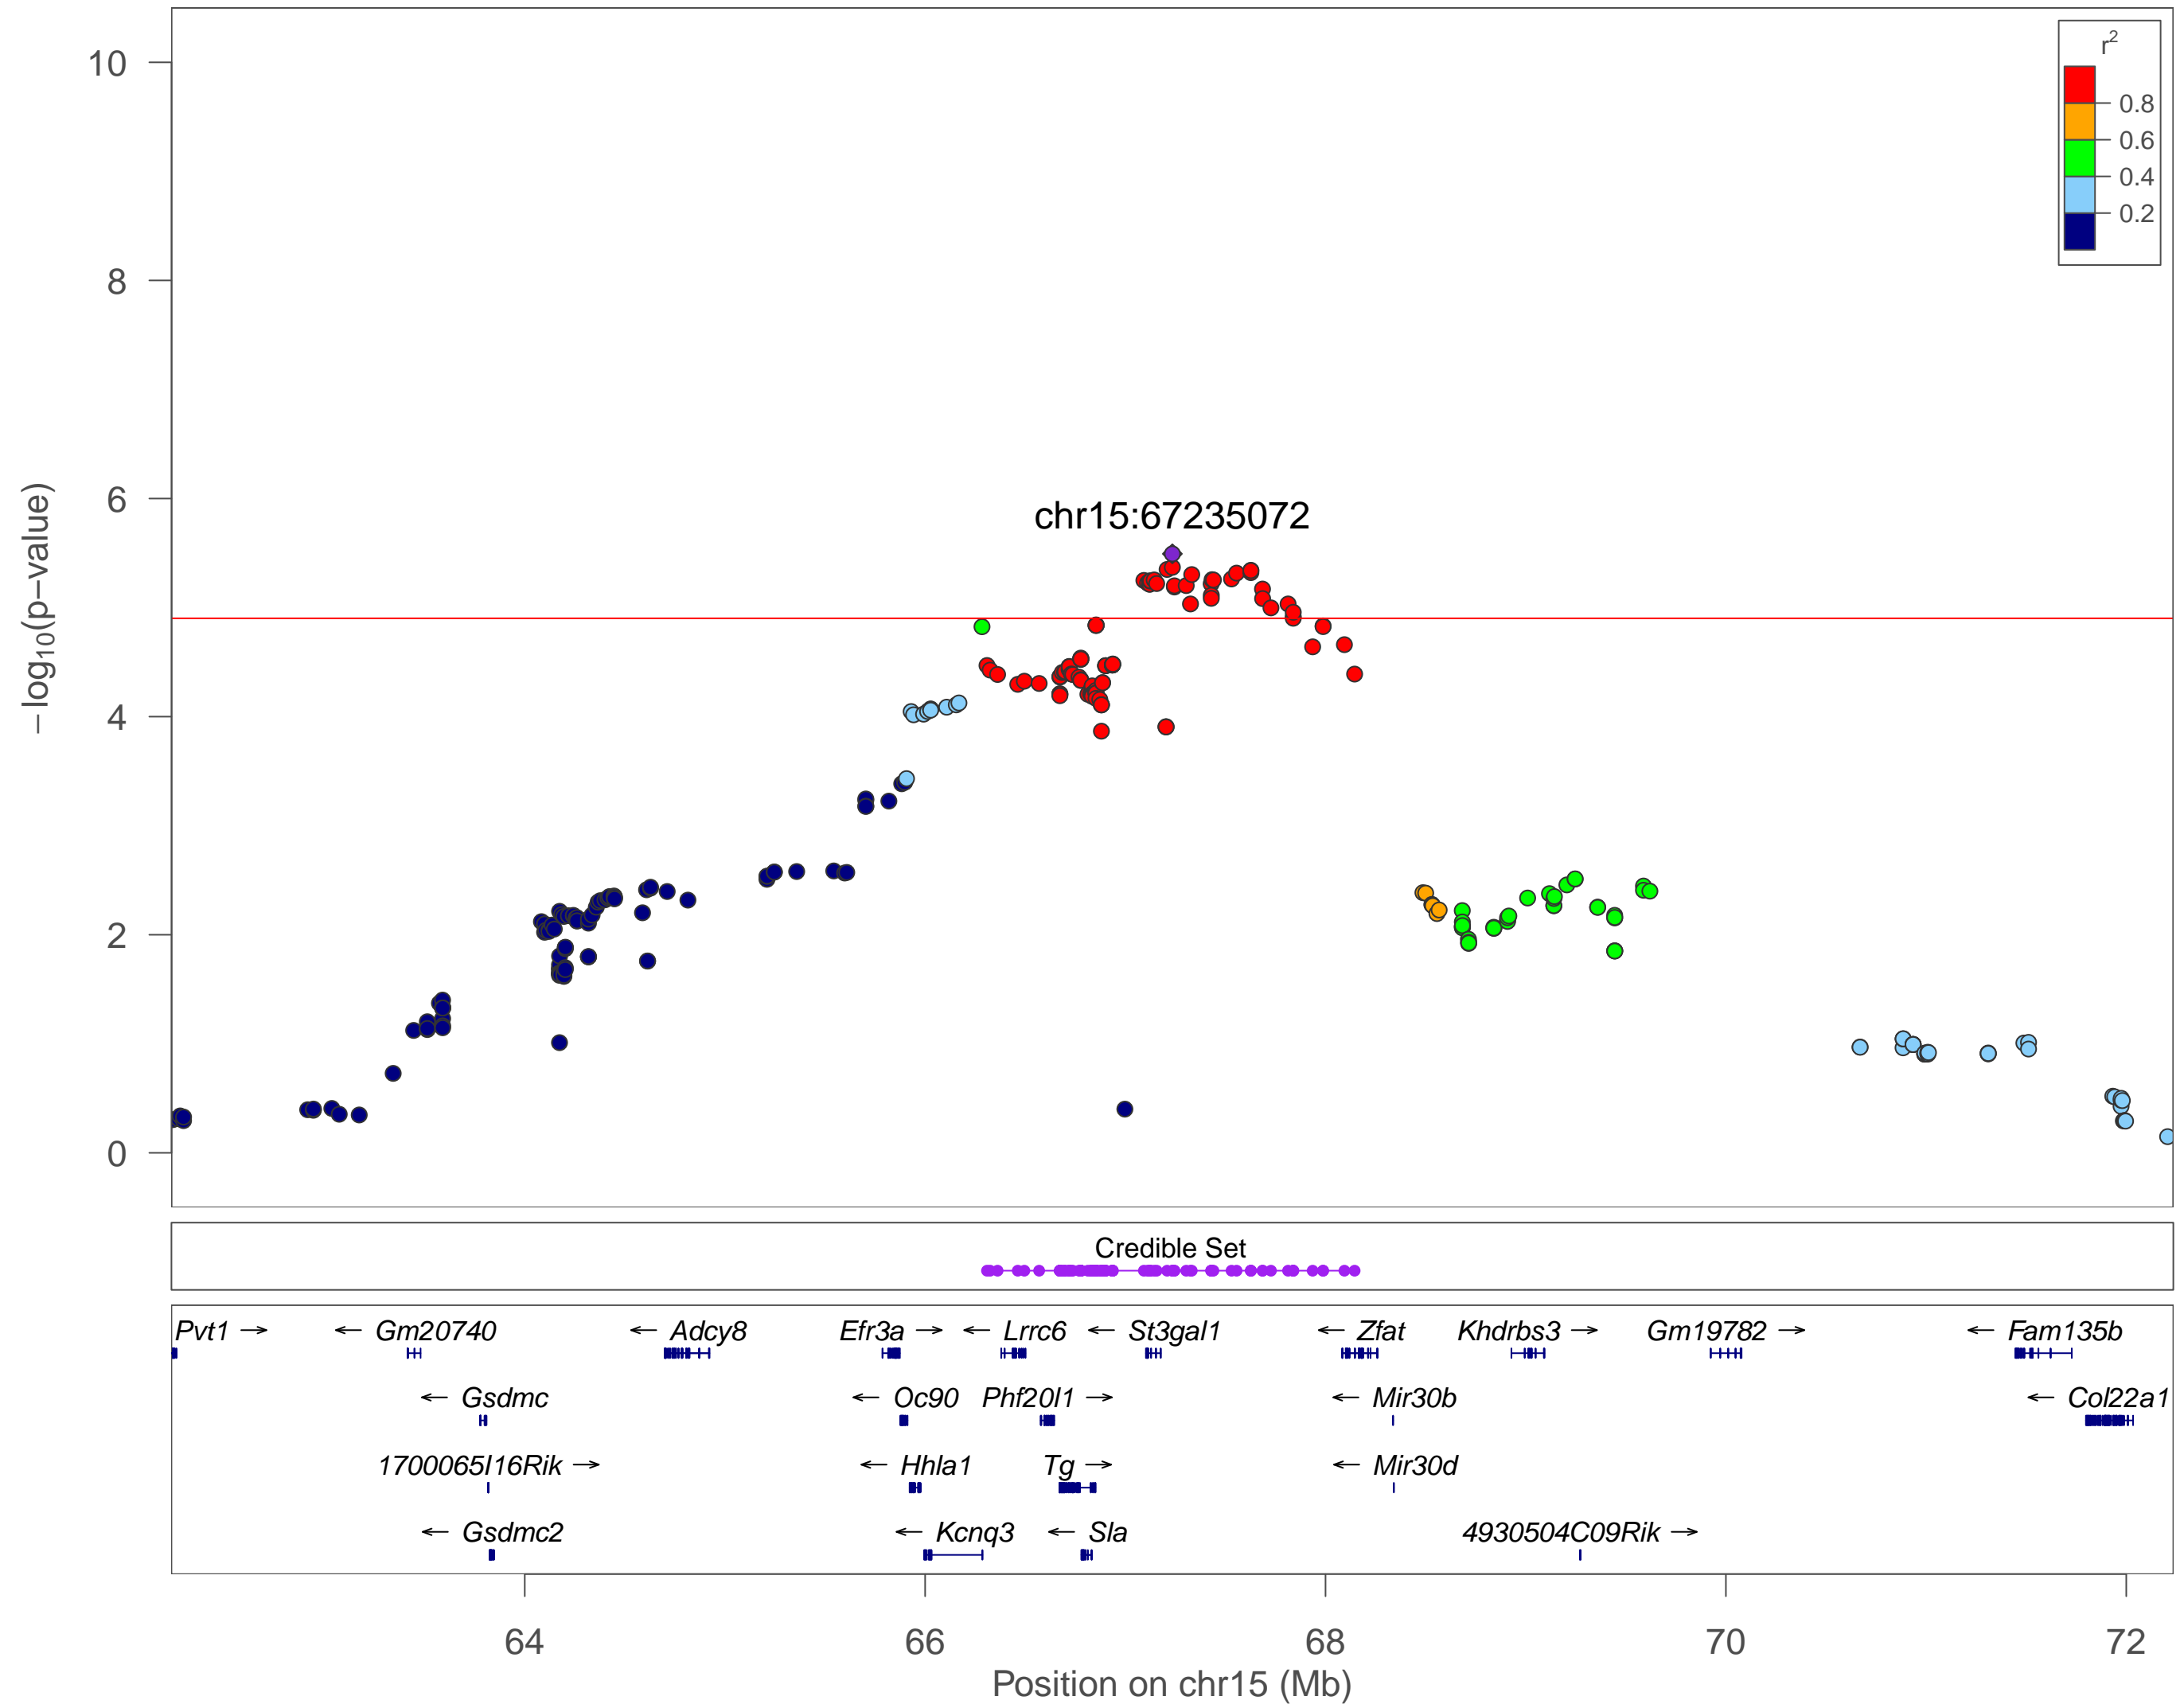

date: Thu Oct 25 17:22:36 2018

build: F3943GBS

display range: chr15:62235072–72235072 [62235072–72235072]

hilite range: 0 – 0 [ 0 – 0 ]

reference SNP: chr15:67235072

number of SNPs plotted: 310

min P-value: 3.21E–6 [chr15:67235072]

max P-value: 7.1E–1 [chr15:72206582]

omitted Genes: Gsdmcl1, Gsdmc3, Gsdmcl2

omitted Genes: Gsdmc4, Gsdmcl-ps, Fam49b

omitted Genes: Asap1, Tmem71, Wisp1

omitted Genes: Ndr1, 1700012I11Rik

## Fine-mapping Regions

| snp            | chr | pos (Mb) | pp          | group        | color  |
|----------------|-----|----------|-------------|--------------|--------|
| chr15:66309070 | 15  | 66.30907 | 0.004218721 | Credible Set | purple |
| chr15:66324506 | 15  | 66.32451 | 0.003847034 | Credible Set | purple |
| chr15:66361813 | 15  | 66.36181 | 0.003523650 | Credible Set | purple |
| chr15:66462727 | 15  | 66.46273 | 0.002893196 | Credible Set | purple |
| chr15:66495529 | 15  | 66.49553 | 0.003080992 | Credible Set | purple |
| chr15:66569471 | 15  | 66.56947 | 0.002943707 | Credible Set | purple |
| chr15:66672984 | 15  | 66.67298 | 0.002364374 | Credible Set | purple |
| chr15:66672997 | 15  | 66.67300 | 0.002396174 | Credible Set | purple |
| chr15:66673010 | 15  | 66.67301 | 0.002381686 | Credible Set | purple |
| chr15:66673015 | 15  | 66.67302 | 0.002304852 | Credible Set | purple |
| chr15:66673436 | 15  | 66.67344 | 0.003341858 | Credible Set | purple |
| chr15:66673541 | 15  | 66.67354 | 0.003372912 | Credible Set | purple |
| chr15:66673940 | 15  | 66.67394 | 0.003385618 | Credible Set | purple |
| chr15:66685097 | 15  | 66.68510 | 0.003667083 | Credible Set | purple |
| chr15:66696518 | 15  | 66.69652 | 0.003683460 | Credible Set | purple |
| chr15:66699723 | 15  | 66.69972 | 0.003729646 | Credible Set | purple |
| chr15:66719126 | 15  | 66.71913 | 0.003898221 | Credible Set | purple |
| chr15:66719241 | 15  | 66.71924 | 0.004140018 | Credible Set | purple |
| chr15:66720772 | 15  | 66.72077 | 0.004121078 | Credible Set | purple |
| chr15:66730424 | 15  | 66.73042 | 0.003560449 | Credible Set | purple |
| chr15:66737376 | 15  | 66.73738 | 0.003519368 | Credible Set | purple |
| chr15:66768701 | 15  | 66.76870 | 0.003341876 | Credible Set | purple |
| chr15:66777400 | 15  | 66.77740 | 0.003179822 | Credible Set | purple |
| chr15:66777425 | 15  | 66.77742 | 0.003127549 | Credible Set | purple |
| chr15:66777461 | 15  | 66.77746 | 0.003138400 | Credible Set | purple |
| chr15:66777706 | 15  | 66.77771 | 0.004896398 | Credible Set | purple |
| chr15:66777728 | 15  | 66.77773 | 0.004816430 | Credible Set | purple |
| chr15:66777729 | 15  | 66.77773 | 0.004843788 | Credible Set | purple |
| chr15:66777730 | 15  | 66.77773 | 0.004809500 | Credible Set | purple |
| chr15:66777731 | 15  | 66.77773 | 0.004763740 | Credible Set | purple |
| chr15:66777743 | 15  | 66.77774 | 0.004802494 | Credible Set | purple |
| chr15:66812941 | 15  | 66.81294 | 0.002370029 | Credible Set | purple |
| chr15:66826934 | 15  | 66.82693 | 0.002388166 | Credible Set | purple |
| chr15:66834506 | 15  | 66.83451 | 0.002747356 | Credible Set | purple |
| chr15:66834532 | 15  | 66.83453 | 0.002755779 | Credible Set | purple |
| chr15:66834574 | 15  | 66.83457 | 0.002766909 | Credible Set | purple |



## Fine-mapping Regions

| snp            | chr | pos (Mb) | pp          | group        | color  |
|----------------|-----|----------|-------------|--------------|--------|
| chr15:66834575 | 15  | 66.83458 | 0.002806045 | Credible Set | purple |
| chr15:66834600 | 15  | 66.83460 | 0.002326459 | Credible Set | purple |
| chr15:66834621 | 15  | 66.83462 | 0.002390184 | Credible Set | purple |
| chr15:66834624 | 15  | 66.83462 | 0.002336239 | Credible Set | purple |
| chr15:66834637 | 15  | 66.83464 | 0.002272719 | Credible Set | purple |
| chr15:66853166 | 15  | 66.85317 | 0.002560343 | Credible Set | purple |
| chr15:66853439 | 15  | 66.85344 | 0.002425835 | Credible Set | purple |
| chr15:66853460 | 15  | 66.85346 | 0.002412435 | Credible Set | purple |
| chr15:66853489 | 15  | 66.85349 | 0.002427979 | Credible Set | purple |
| chr15:66853520 | 15  | 66.85352 | 0.002184658 | Credible Set | purple |
| chr15:66853893 | 15  | 66.85389 | 0.009535500 | Credible Set | purple |
| chr15:66853894 | 15  | 66.85389 | 0.009432374 | Credible Set | purple |
| chr15:66853923 | 15  | 66.85392 | 0.009487307 | Credible Set | purple |
| chr15:66853954 | 15  | 66.85395 | 0.009436047 | Credible Set | purple |
| chr15:66872519 | 15  | 66.87252 | 0.002135683 | Credible Set | purple |
| chr15:66880635 | 15  | 66.88063 | 0.001921461 | Credible Set | purple |
| chr15:66886219 | 15  | 66.88622 | 0.002992645 | Credible Set | purple |
| chr15:66886266 | 15  | 66.88627 | 0.002980984 | Credible Set | purple |
| chr15:66901528 | 15  | 66.90153 | 0.004201679 | Credible Set | purple |
| chr15:66901548 | 15  | 66.90155 | 0.004201679 | Credible Set | purple |
| chr15:66901593 | 15  | 66.90159 | 0.004201679 | Credible Set | purple |
| chr15:66935376 | 15  | 66.93538 | 0.004259205 | Credible Set | purple |
| chr15:66935390 | 15  | 66.93539 | 0.004259205 | Credible Set | purple |
| chr15:66935391 | 15  | 66.93539 | 0.004259205 | Credible Set | purple |
| chr15:66935405 | 15  | 66.93541 | 0.004259205 | Credible Set | purple |
| chr15:66937231 | 15  | 66.93723 | 0.004348588 | Credible Set | purple |
| chr15:66937423 | 15  | 66.93742 | 0.004326168 | Credible Set | purple |
| chr15:67092666 | 15  | 67.09267 | 0.023397132 | Credible Set | purple |
| chr15:67111279 | 15  | 67.11128 | 0.022180952 | Credible Set | purple |
| chr15:67121570 | 15  | 67.12157 | 0.021663589 | Credible Set | purple |
| chr15:67121571 | 15  | 67.12157 | 0.021703182 | Credible Set | purple |
| chr15:67121756 | 15  | 67.12176 | 0.023177643 | Credible Set | purple |
| chr15:67126159 | 15  | 67.12616 | 0.023149580 | Credible Set | purple |
| chr15:67144054 | 15  | 67.14405 | 0.023635943 | Credible Set | purple |
| chr15:67156480 | 15  | 67.15648 | 0.021964536 | Credible Set | purple |
| chr15:67208761 | 15  | 67.20876 | 0.029211974 | Credible Set | purple |

## Fine-mapping Regions

| snp            | chr | pos (Mb) | pp          | group        | color  |
|----------------|-----|----------|-------------|--------------|--------|
| chr15:67234910 | 15  | 67.23491 | 0.030492843 | Credible Set | purple |
| chr15:67235072 | 15  | 67.23507 | 0.040065247 | Credible Set | purple |
| chr15:67245093 | 15  | 67.24509 | 0.020492326 | Credible Set | purple |
| chr15:67245123 | 15  | 67.24512 | 0.020986614 | Credible Set | purple |
| chr15:67304194 | 15  | 67.30419 | 0.021077940 | Credible Set | purple |
| chr15:67325463 | 15  | 67.32546 | 0.014546746 | Credible Set | purple |
| chr15:67331738 | 15  | 67.33174 | 0.026328169 | Credible Set | purple |
| chr15:67428857 | 15  | 67.42886 | 0.021852100 | Credible Set | purple |
| chr15:67429407 | 15  | 67.42941 | 0.017335645 | Credible Set | purple |
| chr15:67429420 | 15  | 67.42942 | 0.016288454 | Credible Set | purple |
| chr15:67433395 | 15  | 67.43340 | 0.023764279 | Credible Set | purple |
| chr15:67439974 | 15  | 67.43997 | 0.023625179 | Credible Set | purple |
| chr15:67530570 | 15  | 67.53057 | 0.024089841 | Credible Set | purple |
| chr15:67555683 | 15  | 67.55568 | 0.027120550 | Credible Set | purple |
| chr15:67627161 | 15  | 67.62716 | 0.027397710 | Credible Set | purple |
| chr15:67627183 | 15  | 67.62718 | 0.028716840 | Credible Set | purple |
| chr15:67627194 | 15  | 67.62719 | 0.028529663 | Credible Set | purple |
| chr15:67685224 | 15  | 67.68522 | 0.019665874 | Credible Set | purple |
| chr15:67685781 | 15  | 67.68578 | 0.016203904 | Credible Set | purple |
| chr15:67727448 | 15  | 67.72745 | 0.013448954 | Credible Set | purple |
| chr15:67812971 | 15  | 67.81297 | 0.014546955 | Credible Set | purple |
| chr15:67838708 | 15  | 67.83871 | 0.011277705 | Credible Set | purple |
| chr15:67838720 | 15  | 67.83872 | 0.010906976 | Credible Set | purple |
| chr15:67838721 | 15  | 67.83872 | 0.012305026 | Credible Set | purple |
| chr15:67935812 | 15  | 67.93581 | 0.006137792 | Credible Set | purple |
| chr15:67987913 | 15  | 67.98791 | 0.009345022 | Credible Set | purple |
| chr15:67987932 | 15  | 67.98793 | 0.009214896 | Credible Set | purple |
| chr15:68094377 | 15  | 68.09438 | 0.006410000 | Credible Set | purple |
| chr15:68145325 | 15  | 68.14532 | 0.003551565 | Credible Set | purple |

F39–43 GBS, locomotor test day 3, total distance travelled in 30min (cm)

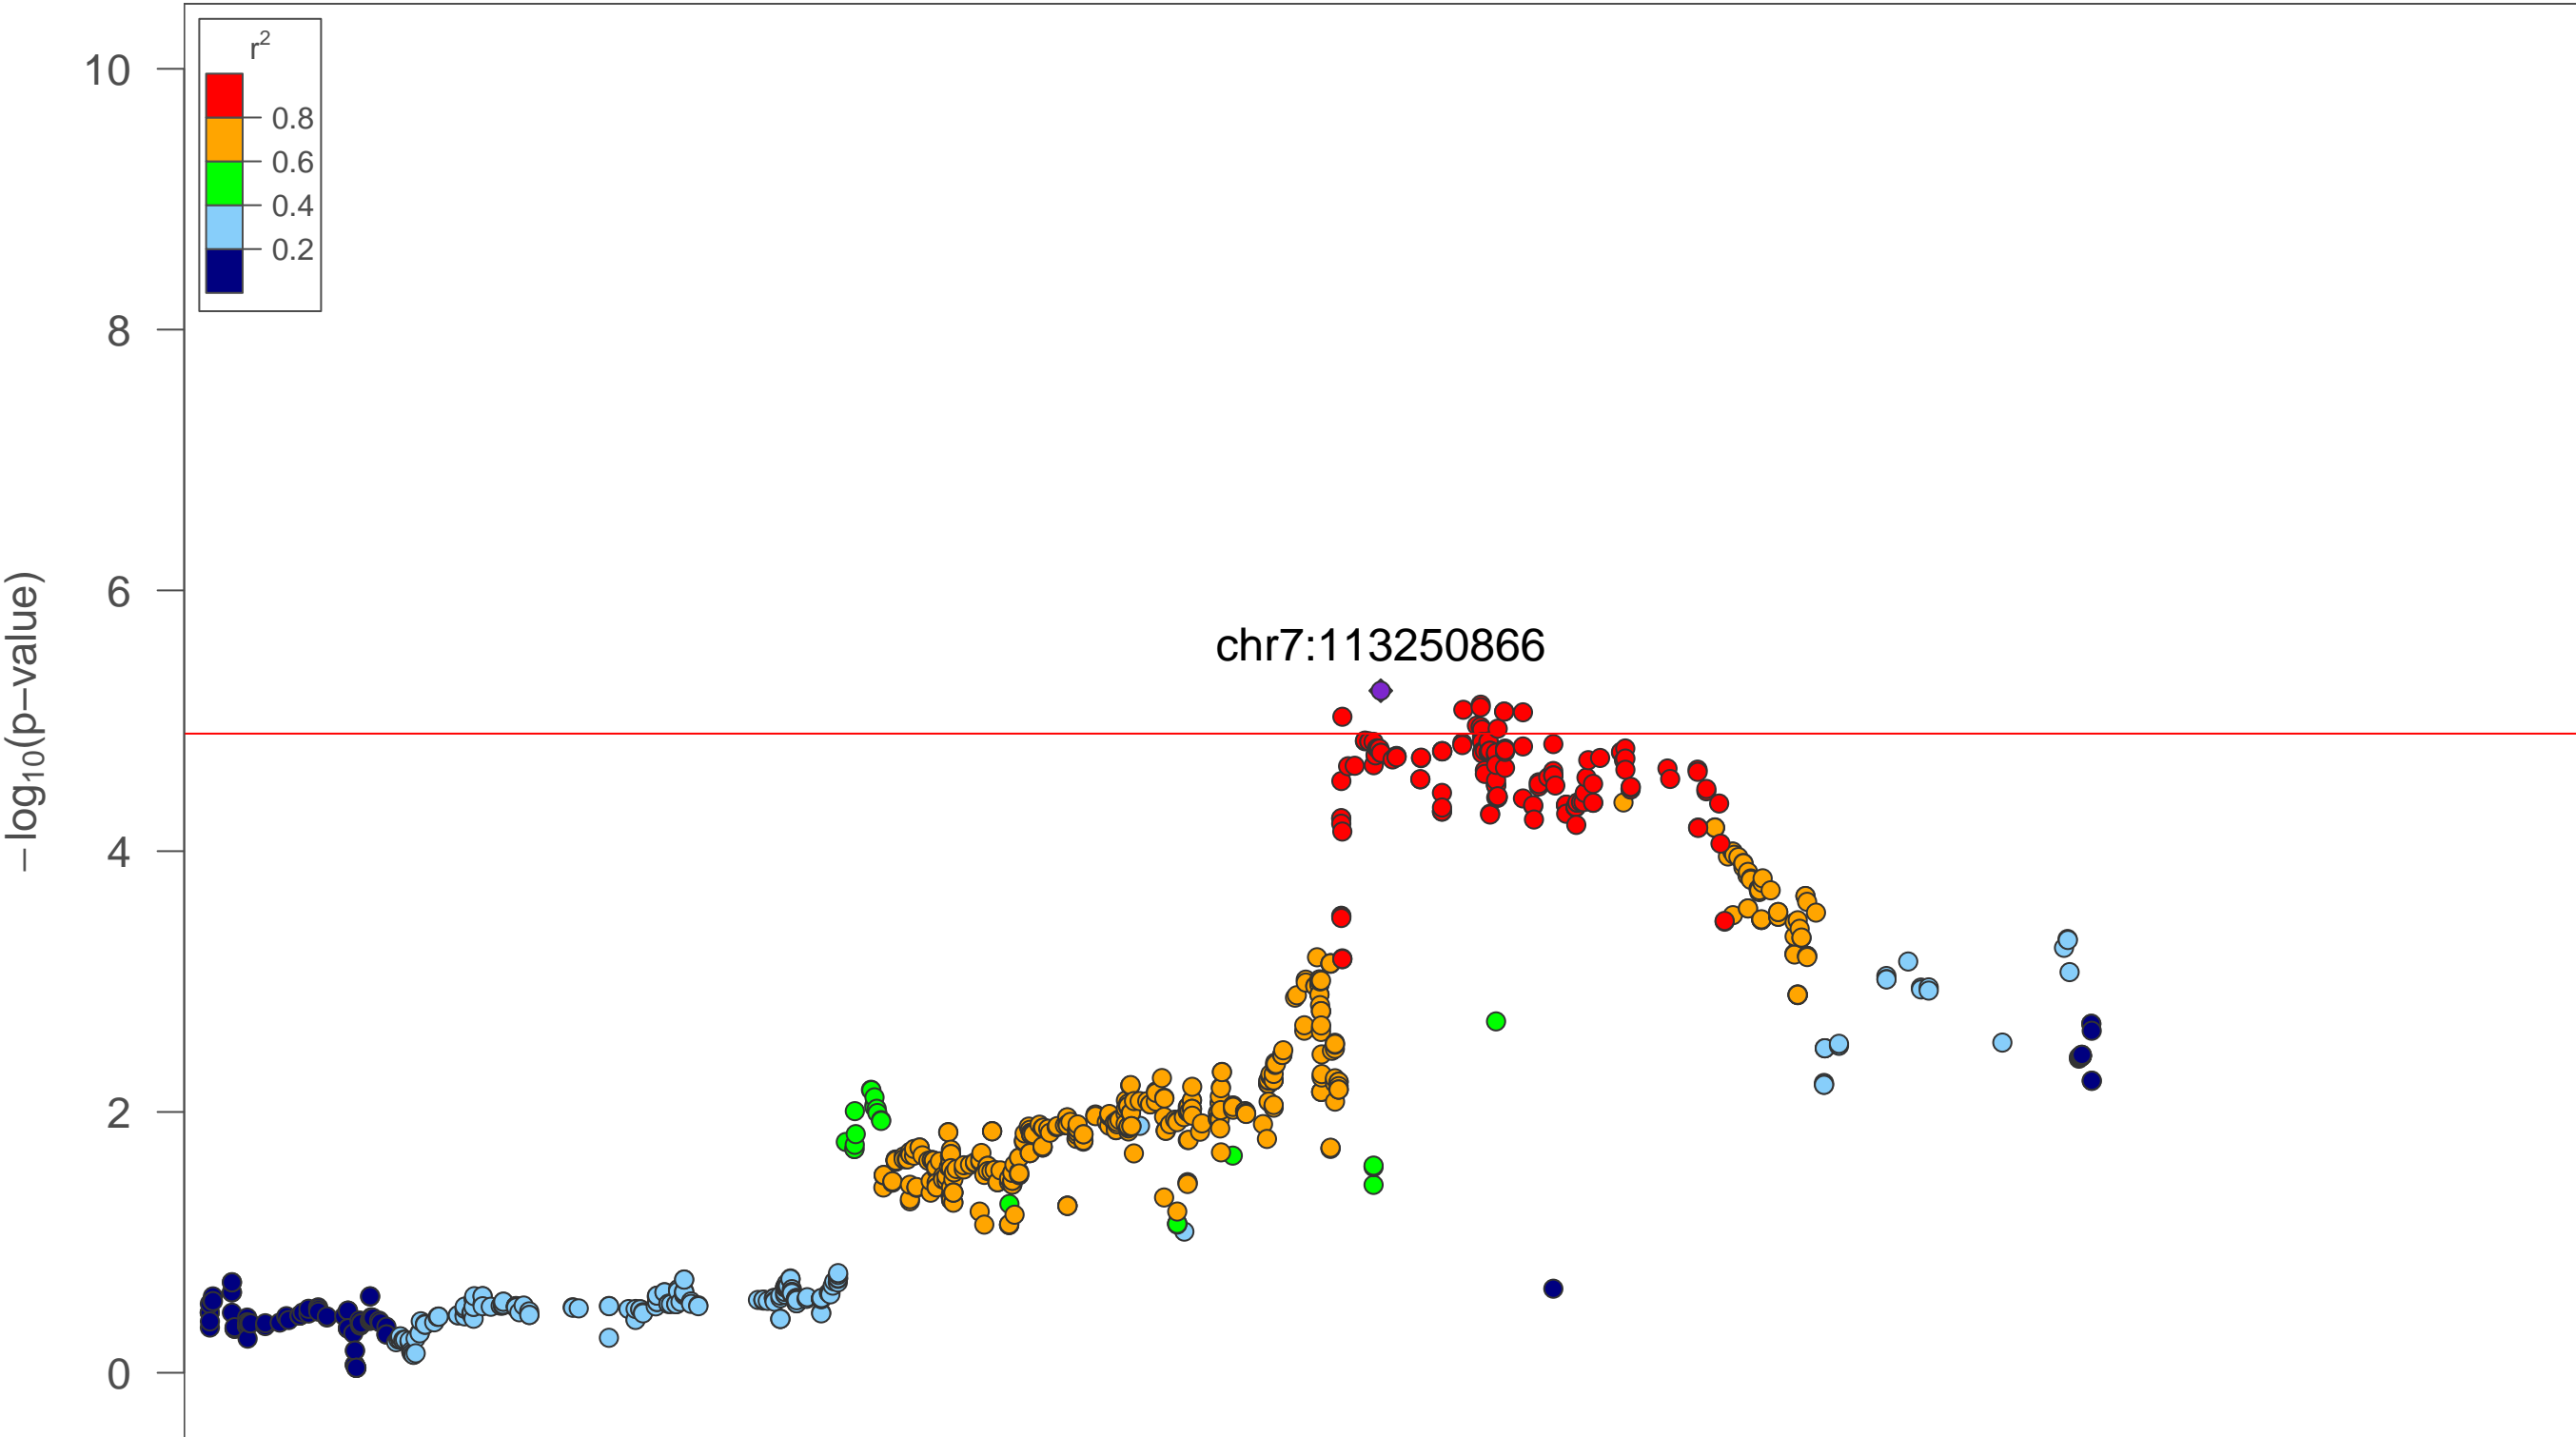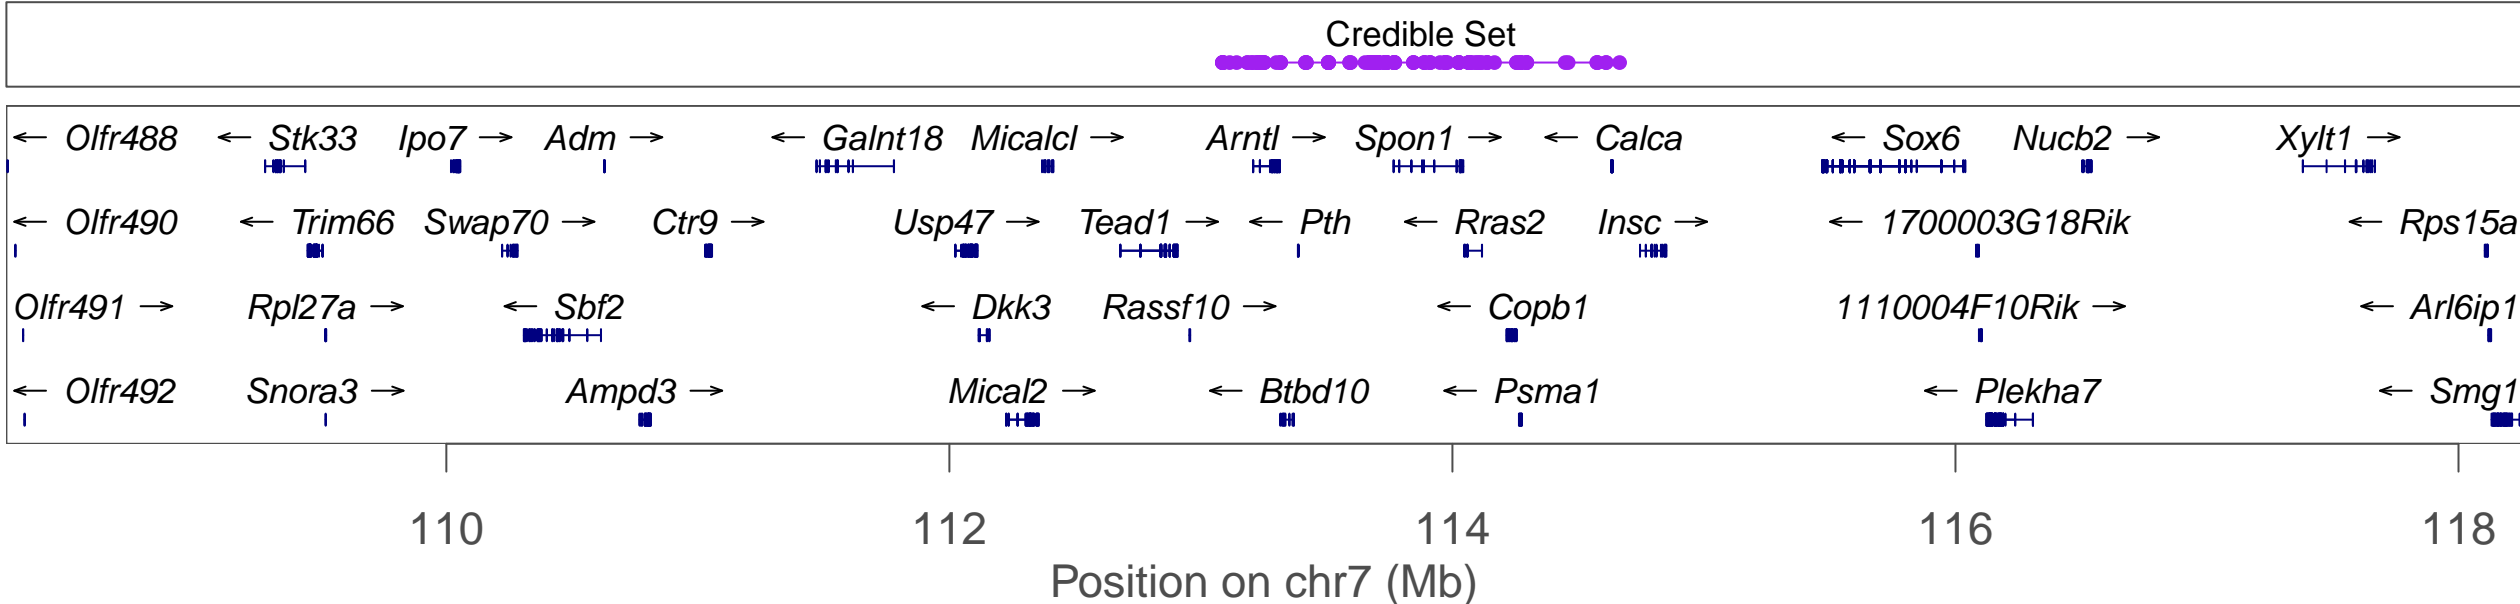

date: Thu Oct 25 17:22:48 2018  
build: F3943GBS  
display range: chr7:108250866–118250866 [108250866–118250866]  
hilite range: 0 – 0 [ 0 – 0 ]  
reference SNP: chr7:113250866  
number of SNPs plotted: 880  
min P-value: 5.88E–6 [chr7:113250866]  
max P-value: 9.18E–1 [chr7:108970686]  
omitted Genes: Olfr493, Olfr494, Olfr495  
omitted Genes: Olfr497, Olfr498, Olfr502  
omitted Genes: Olfr503, Olfr504, Olfr506  
omitted Genes: Olfr507, Olfr508, Olfr509  
omitted Genes: Olfr510, Olfr512, Olfr513  
omitted Genes: Olfr514, Olfr516, Olfr517  
omitted Genes: Olfr518, Olfr519, Nlrp10  
omitted Genes: Eif3f, Tub, Ric3  
omitted Genes: Lmo1, St5, Akip1  
omitted Genes: BC051019, Ascl3, Tmem9b  
omitted Genes: Nrip3, Scube2, Dennd5a  
omitted Genes: Tmem41b, 1600010M07Rik, Snora23  
omitted Genes: Zfp143, Wee1, Rnf141  
omitted Genes: Lyve1, Mrvi1, Gm16336  
omitted Genes: Eif4g2, 1700012D14Rik, Parva  
omitted Genes: 4930543E12Rik, Far1, Far1os  
omitted Genes: 4933406I18Rik, Pde3b, Cyp2r1  
omitted Genes: Calcb, A730082K24Rik, Rps13  
omitted Genes: Snord14a, Pik3c2a, 4930583K01Rik

## Fine-mapping Regions

| snp            | chr | pos (Mb) | pp          | group        | color  |
|----------------|-----|----------|-------------|--------------|--------|
| chr7:113085544 | 7   | 113.0855 | 0.002796477 | Credible Set | purple |
| chr7:113085717 | 7   | 113.0857 | 0.002819713 | Credible Set | purple |
| chr7:113085735 | 7   | 113.0857 | 0.002568453 | Credible Set | purple |
| chr7:113086048 | 7   | 113.0860 | 0.005247494 | Credible Set | purple |
| chr7:113090456 | 7   | 113.0905 | 0.015481312 | Credible Set | purple |
| chr7:113114328 | 7   | 113.1143 | 0.006730116 | Credible Set | purple |
| chr7:113141980 | 7   | 113.1420 | 0.006781083 | Credible Set | purple |
| chr7:113184658 | 7   | 113.1847 | 0.010244835 | Credible Set | purple |
| chr7:113185148 | 7   | 113.1851 | 0.010362436 | Credible Set | purple |
| chr7:113203215 | 7   | 113.2032 | 0.010206688 | Credible Set | purple |
| chr7:113203253 | 7   | 113.2033 | 0.010182231 | Credible Set | purple |
| chr7:113220615 | 7   | 113.2206 | 0.010150578 | Credible Set | purple |
| chr7:113221228 | 7   | 113.2212 | 0.006839210 | Credible Set | purple |
| chr7:113229151 | 7   | 113.2292 | 0.008137461 | Credible Set | purple |
| chr7:113229207 | 7   | 113.2292 | 0.008079794 | Credible Set | purple |
| chr7:113235202 | 7   | 113.2352 | 0.009099652 | Credible Set | purple |
| chr7:113241920 | 7   | 113.2419 | 0.008951104 | Credible Set | purple |
| chr7:113242507 | 7   | 113.2425 | 0.008951104 | Credible Set | purple |
| chr7:113242523 | 7   | 113.2425 | 0.008951104 | Credible Set | purple |
| chr7:113245448 | 7   | 113.2454 | 0.009046167 | Credible Set | purple |
| chr7:113250866 | 7   | 113.2509 | 0.024015711 | Credible Set | purple |
| chr7:113251619 | 7   | 113.2516 | 0.008432309 | Credible Set | purple |
| chr7:113251923 | 7   | 113.2519 | 0.008431163 | Credible Set | purple |
| chr7:113300135 | 7   | 113.3001 | 0.007541746 | Credible Set | purple |
| chr7:113316522 | 7   | 113.3165 | 0.008003237 | Credible Set | purple |
| chr7:113316880 | 7   | 113.3169 | 0.007972719 | Credible Set | purple |
| chr7:113317049 | 7   | 113.3170 | 0.007820710 | Credible Set | purple |
| chr7:113416115 | 7   | 113.4161 | 0.005391595 | Credible Set | purple |
| chr7:113416126 | 7   | 113.4161 | 0.005415708 | Credible Set | purple |
| chr7:113419158 | 7   | 113.4192 | 0.007710598 | Credible Set | purple |
| chr7:113419175 | 7   | 113.4192 | 0.007776287 | Credible Set | purple |
| chr7:113506581 | 7   | 113.5066 | 0.004301741 | Credible Set | purple |
| chr7:113506703 | 7   | 113.5067 | 0.003137199 | Credible Set | purple |
| chr7:113506713 | 7   | 113.5067 | 0.003153893 | Credible Set | purple |
| chr7:113506834 | 7   | 113.5068 | 0.003366335 | Credible Set | purple |
| chr7:113507166 | 7   | 113.5072 | 0.008622940 | Credible Set | purple |

## Fine-mapping Regions

| snp            | chr | pos (Mb) | pp          | group        | color  |
|----------------|-----|----------|-------------|--------------|--------|
| chr7:113507171 | 7   | 113.5072 | 0.008695265 | Credible Set | purple |
| chr7:113507899 | 7   | 113.5079 | 0.008654981 | Credible Set | purple |
| chr7:113507930 | 7   | 113.5079 | 0.008654981 | Credible Set | purple |
| chr7:113591658 | 7   | 113.5917 | 0.009966100 | Credible Set | purple |
| chr7:113591661 | 7   | 113.5917 | 0.009599952 | Credible Set | purple |
| chr7:113595728 | 7   | 113.5957 | 0.017412622 | Credible Set | purple |
| chr7:113652590 | 7   | 113.6526 | 0.013349584 | Credible Set | purple |
| chr7:113668251 | 7   | 113.6683 | 0.013081478 | Credible Set | purple |
| chr7:113668346 | 7   | 113.6683 | 0.018986237 | Credible Set | purple |
| chr7:113668406 | 7   | 113.6684 | 0.018178367 | Credible Set | purple |
| chr7:113674001 | 7   | 113.6740 | 0.011109042 | Credible Set | purple |
| chr7:113674010 | 7   | 113.6740 | 0.012488081 | Credible Set | purple |
| chr7:113674041 | 7   | 113.6740 | 0.010135776 | Credible Set | purple |
| chr7:113674594 | 7   | 113.6746 | 0.008623906 | Credible Set | purple |
| chr7:113674603 | 7   | 113.6746 | 0.008342368 | Credible Set | purple |
| chr7:113685578 | 7   | 113.6856 | 0.008692391 | Credible Set | purple |
| chr7:113685734 | 7   | 113.6857 | 0.006284474 | Credible Set | purple |
| chr7:113685763 | 7   | 113.6858 | 0.005909508 | Credible Set | purple |
| chr7:113701178 | 7   | 113.7012 | 0.010191691 | Credible Set | purple |
| chr7:113701223 | 7   | 113.7012 | 0.010199906 | Credible Set | purple |
| chr7:113701622 | 7   | 113.7016 | 0.008505141 | Credible Set | purple |
| chr7:113701636 | 7   | 113.7016 | 0.008543398 | Credible Set | purple |
| chr7:113707091 | 7   | 113.7071 | 0.008729783 | Credible Set | purple |
| chr7:113707401 | 7   | 113.7074 | 0.008643357 | Credible Set | purple |
| chr7:113707540 | 7   | 113.7075 | 0.008720290 | Credible Set | purple |
| chr7:113707570 | 7   | 113.7076 | 0.003035583 | Credible Set | purple |
| chr7:113707711 | 7   | 113.7077 | 0.002992048 | Credible Set | purple |
| chr7:113732491 | 7   | 113.7325 | 0.008064347 | Credible Set | purple |
| chr7:113732536 | 7   | 113.7325 | 0.004901827 | Credible Set | purple |
| chr7:113732545 | 7   | 113.7325 | 0.004945548 | Credible Set | purple |
| chr7:113732598 | 7   | 113.7326 | 0.004834842 | Credible Set | purple |
| chr7:113732713 | 7   | 113.7327 | 0.008322569 | Credible Set | purple |
| chr7:113732753 | 7   | 113.7328 | 0.008443791 | Credible Set | purple |
| chr7:113732795 | 7   | 113.7328 | 0.005314738 | Credible Set | purple |
| chr7:113732809 | 7   | 113.7328 | 0.006881168 | Credible Set | purple |
| chr7:113733239 | 7   | 113.7332 | 0.003977621 | Credible Set | purple |

## Fine-mapping Regions

| snp            | chr | pos (Mb) | pp          | group        | color  |
|----------------|-----|----------|-------------|--------------|--------|
| chr7:113739150 | 7   | 113.7391 | 0.003957119 | Credible Set | purple |
| chr7:113739171 | 7   | 113.7392 | 0.004027427 | Credible Set | purple |
| chr7:113739179 | 7   | 113.7392 | 0.004065202 | Credible Set | purple |
| chr7:113739386 | 7   | 113.7394 | 0.012654550 | Credible Set | purple |
| chr7:113766388 | 7   | 113.7664 | 0.016892162 | Credible Set | purple |
| chr7:113766440 | 7   | 113.7664 | 0.016892162 | Credible Set | purple |
| chr7:113769934 | 7   | 113.7699 | 0.006550702 | Credible Set | purple |
| chr7:113770008 | 7   | 113.7700 | 0.009061291 | Credible Set | purple |
| chr7:113770031 | 7   | 113.7700 | 0.008562666 | Credible Set | purple |
| chr7:113770154 | 7   | 113.7702 | 0.008827398 | Credible Set | purple |
| chr7:113844950 | 7   | 113.8449 | 0.003918973 | Credible Set | purple |
| chr7:113844980 | 7   | 113.8450 | 0.009386433 | Credible Set | purple |
| chr7:113844999 | 7   | 113.8450 | 0.016683601 | Credible Set | purple |
| chr7:113887720 | 7   | 113.8877 | 0.003448300 | Credible Set | purple |
| chr7:113887792 | 7   | 113.8878 | 0.003495612 | Credible Set | purple |
| chr7:113890924 | 7   | 113.8909 | 0.002754082 | Credible Set | purple |
| chr7:113911095 | 7   | 113.9111 | 0.005141458 | Credible Set | purple |
| chr7:113911106 | 7   | 113.9111 | 0.004786978 | Credible Set | purple |
| chr7:113911113 | 7   | 113.9111 | 0.004989588 | Credible Set | purple |
| chr7:113950754 | 7   | 113.9508 | 0.005593657 | Credible Set | purple |
| chr7:113971635 | 7   | 113.9716 | 0.006208169 | Credible Set | purple |
| chr7:113971799 | 7   | 113.9718 | 0.009760761 | Credible Set | purple |
| chr7:113971835 | 7   | 113.9718 | 0.005758970 | Credible Set | purple |
| chr7:113971836 | 7   | 113.9718 | 0.005758970 | Credible Set | purple |
| chr7:113971886 | 7   | 113.9719 | 0.005758970 | Credible Set | purple |
| chr7:113980077 | 7   | 113.9801 | 0.004867257 | Credible Set | purple |
| chr7:114025271 | 7   | 114.0253 | 0.003474267 | Credible Set | purple |
| chr7:114025295 | 7   | 114.0253 | 0.003528738 | Credible Set | purple |
| chr7:114025329 | 7   | 114.0253 | 0.003488529 | Credible Set | purple |
| chr7:114025421 | 7   | 114.0254 | 0.003533123 | Credible Set | purple |
| chr7:114025449 | 7   | 114.0254 | 0.003031656 | Credible Set | purple |
| chr7:114064763 | 7   | 114.0648 | 0.003381599 | Credible Set | purple |
| chr7:114064790 | 7   | 114.0648 | 0.003381599 | Credible Set | purple |
| chr7:114065169 | 7   | 114.0652 | 0.003395443 | Credible Set | purple |
| chr7:114065223 | 7   | 114.0652 | 0.003379083 | Credible Set | purple |
| chr7:114065340 | 7   | 114.0653 | 0.003400781 | Credible Set | purple |

## Fine-mapping Regions

| snp            | chr | pos (Mb) | pp          | group        | color  |
|----------------|-----|----------|-------------|--------------|--------|
| chr7:114067633 | 7   | 114.0676 | 0.002516105 | Credible Set | purple |
| chr7:114072319 | 7   | 114.0723 | 0.003650765 | Credible Set | purple |
| chr7:114072371 | 7   | 114.0724 | 0.003649414 | Credible Set | purple |
| chr7:114087599 | 7   | 114.0876 | 0.003680860 | Credible Set | purple |
| chr7:114097503 | 7   | 114.0975 | 0.003679244 | Credible Set | purple |
| chr7:114103184 | 7   | 114.1032 | 0.004298548 | Credible Set | purple |
| chr7:114110302 | 7   | 114.1103 | 0.005565783 | Credible Set | purple |
| chr7:114117795 | 7   | 114.1178 | 0.007454142 | Credible Set | purple |
| chr7:114137930 | 7   | 114.1379 | 0.005002165 | Credible Set | purple |
| chr7:114138279 | 7   | 114.1383 | 0.003640964 | Credible Set | purple |
| chr7:114138316 | 7   | 114.1383 | 0.003649746 | Credible Set | purple |
| chr7:114167242 | 7   | 114.1672 | 0.007733764 | Credible Set | purple |
| chr7:114254780 | 7   | 114.2548 | 0.008477343 | Credible Set | purple |
| chr7:114254849 | 7   | 114.2548 | 0.008566051 | Credible Set | purple |
| chr7:114267072 | 7   | 114.2671 | 0.007429313 | Credible Set | purple |
| chr7:114272429 | 7   | 114.2724 | 0.009074710 | Credible Set | purple |
| chr7:114272945 | 7   | 114.2729 | 0.007657361 | Credible Set | purple |
| chr7:114272958 | 7   | 114.2730 | 0.006341523 | Credible Set | purple |
| chr7:114294236 | 7   | 114.2942 | 0.004606543 | Credible Set | purple |
| chr7:114294864 | 7   | 114.2949 | 0.004544244 | Credible Set | purple |
| chr7:114294958 | 7   | 114.2950 | 0.004716236 | Credible Set | purple |
| chr7:114295531 | 7   | 114.2955 | 0.004761816 | Credible Set | purple |
| chr7:114448685 | 7   | 114.4487 | 0.006479947 | Credible Set | purple |
| chr7:114459930 | 7   | 114.4599 | 0.005434514 | Credible Set | purple |
| chr7:114574313 | 7   | 114.5743 | 0.006357905 | Credible Set | purple |
| chr7:114574808 | 7   | 114.5748 | 0.006119974 | Credible Set | purple |
| chr7:114576812 | 7   | 114.5768 | 0.002409922 | Credible Set | purple |
| chr7:114611182 | 7   | 114.6112 | 0.004416014 | Credible Set | purple |
| chr7:114611200 | 7   | 114.6112 | 0.004596392 | Credible Set | purple |
| chr7:114664623 | 7   | 114.6646 | 0.003599431 | Credible Set | purple |



F39–43 GBS, open field, distance moved in total in 1st 5 minutes (cm)

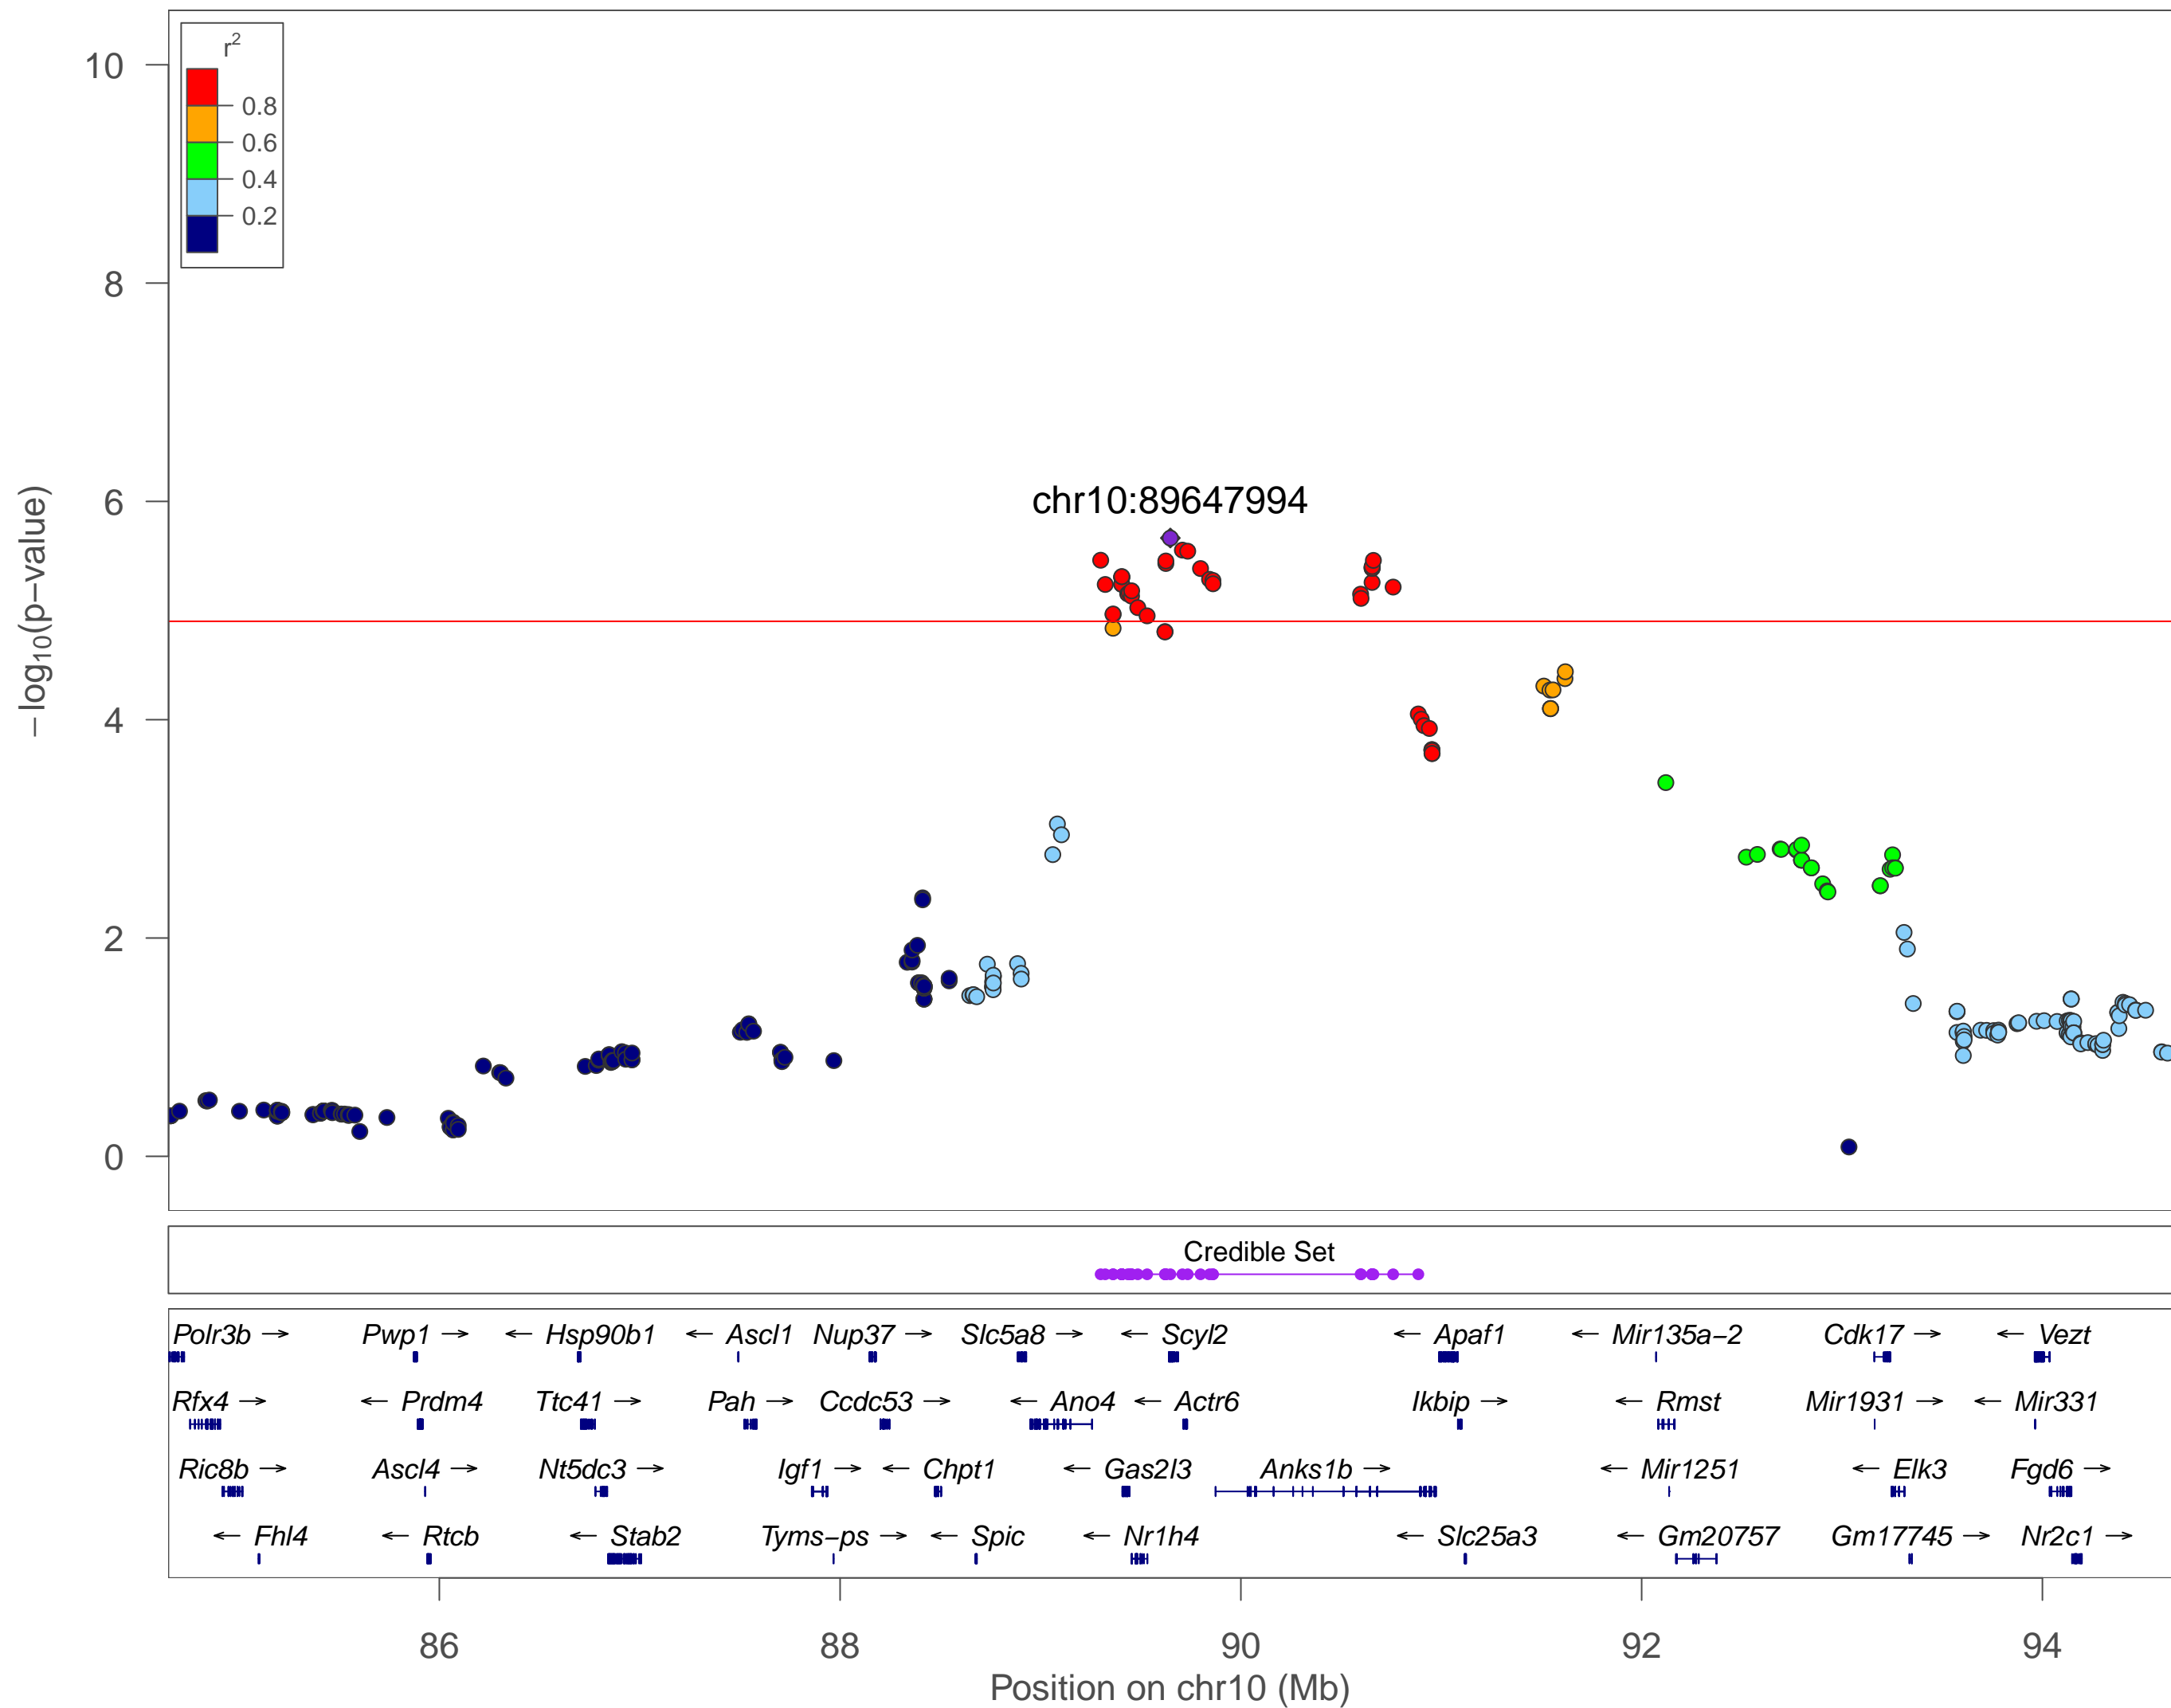

date: Thu Oct 25 17:24:27 2018  
build: F3943GBS  
display range: chr10:84647994–94647994 [84647994–94647994]  
hilite range: 0 – 0 [ 0 – 0 ]  
reference SNP: chr10:89647994  
number of SNPs plotted: 282  
min P-value: 2.17E–6 [chr10:89647994]  
max P-value: 8.21E–1 [chr10:93034582]  
omitted Genes: Tmem263, Mterf2, Cry1  
omitted Genes: Btbd11, Bpifc, Fbxo7  
omitted Genes: Syn3, 4930486F22Rik, Timp3  
omitted Genes: 1810014B01Rik, 1700113H08Rik, Pmch  
omitted Genes: Parpbp, Dram1, Gnptab  
omitted Genes: Sycp3, Mybpc1, Gm4925  
omitted Genes: Arl1, Utp20, Slc17a8  
omitted Genes: 1500026H17Rik, Uhrf1bp1l, Tmpo  
omitted Genes: Nedd1, Mir7688, Lta4h  
omitted Genes: Hal, Amdhd1, Ccdc38  
omitted Genes: Snrpf, 4933408J17Rik, Ntn4  
omitted Genes: Gm8580, Gm15915, Usp44  
omitted Genes: Metap2, Ndufa12, Gm4792  
omitted Genes: Tmcc3, Mir7211

## Fine-mapping Regions

| snp            | chr | pos (Mb) | pp          | group        | color  |
|----------------|-----|----------|-------------|--------------|--------|
| chr10:89300286 | 10  | 89.30029 | 0.039658176 | Credible Set | purple |
| chr10:89323084 | 10  | 89.32308 | 0.024301506 | Credible Set | purple |
| chr10:89362102 | 10  | 89.36210 | 0.013262560 | Credible Set | purple |
| chr10:89362162 | 10  | 89.36216 | 0.013402175 | Credible Set | purple |
| chr10:89405522 | 10  | 89.40552 | 0.028064254 | Credible Set | purple |
| chr10:89405533 | 10  | 89.40553 | 0.028049881 | Credible Set | purple |
| chr10:89405556 | 10  | 89.40556 | 0.024383361 | Credible Set | purple |
| chr10:89405564 | 10  | 89.40556 | 0.024383361 | Credible Set | purple |
| chr10:89405589 | 10  | 89.40559 | 0.028403912 | Credible Set | purple |
| chr10:89405627 | 10  | 89.40563 | 0.028468271 | Credible Set | purple |
| chr10:89435280 | 10  | 89.43528 | 0.020095981 | Credible Set | purple |
| chr10:89443390 | 10  | 89.44339 | 0.020508863 | Credible Set | purple |
| chr10:89454154 | 10  | 89.45415 | 0.019212661 | Credible Set | purple |
| chr10:89454848 | 10  | 89.45485 | 0.021379181 | Credible Set | purple |
| chr10:89485534 | 10  | 89.48553 | 0.015219465 | Credible Set | purple |
| chr10:89532131 | 10  | 89.53213 | 0.012905509 | Credible Set | purple |
| chr10:89621284 | 10  | 89.62128 | 0.009400969 | Credible Set | purple |
| chr10:89621319 | 10  | 89.62132 | 0.009334225 | Credible Set | purple |
| chr10:89625488 | 10  | 89.62549 | 0.037120864 | Credible Set | purple |
| chr10:89625559 | 10  | 89.62556 | 0.039059226 | Credible Set | purple |
| chr10:89647994 | 10  | 89.64799 | 0.062146943 | Credible Set | purple |
| chr10:89708192 | 10  | 89.70819 | 0.048669204 | Credible Set | purple |
| chr10:89734590 | 10  | 89.73459 | 0.047603407 | Credible Set | purple |
| chr10:89798643 | 10  | 89.79864 | 0.033517475 | Credible Set | purple |
| chr10:89843657 | 10  | 89.84366 | 0.026960457 | Credible Set | purple |
| chr10:89860498 | 10  | 89.86050 | 0.026344017 | Credible Set | purple |
| chr10:89860846 | 10  | 89.86085 | 0.024632428 | Credible Set | purple |
| chr10:90597510 | 10  | 90.59751 | 0.019974958 | Credible Set | purple |
| chr10:90599690 | 10  | 90.59969 | 0.018344301 | Credible Set | purple |
| chr10:90654718 | 10  | 90.65472 | 0.025324184 | Credible Set | purple |
| chr10:90654994 | 10  | 90.65499 | 0.033637282 | Credible Set | purple |
| chr10:90654998 | 10  | 90.65500 | 0.034502714 | Credible Set | purple |
| chr10:90655002 | 10  | 90.65500 | 0.033705251 | Credible Set | purple |
| chr10:90655039 | 10  | 90.65504 | 0.034927973 | Credible Set | purple |
| chr10:90661222 | 10  | 90.66122 | 0.039527761 | Credible Set | purple |
| chr10:90759813 | 10  | 90.75981 | 0.023054811 | Credible Set | purple |

Fine-mapping Regions

| snp            | chr | pos (Mb) | pp          | group        | color  |
|----------------|-----|----------|-------------|--------------|--------|
| chr10:90885383 | 10  | 90.88538 | 0.001806502 | Credible Set | purple |

F39–43 GBS, open field, zone transition frequency in 1st 5 minutes

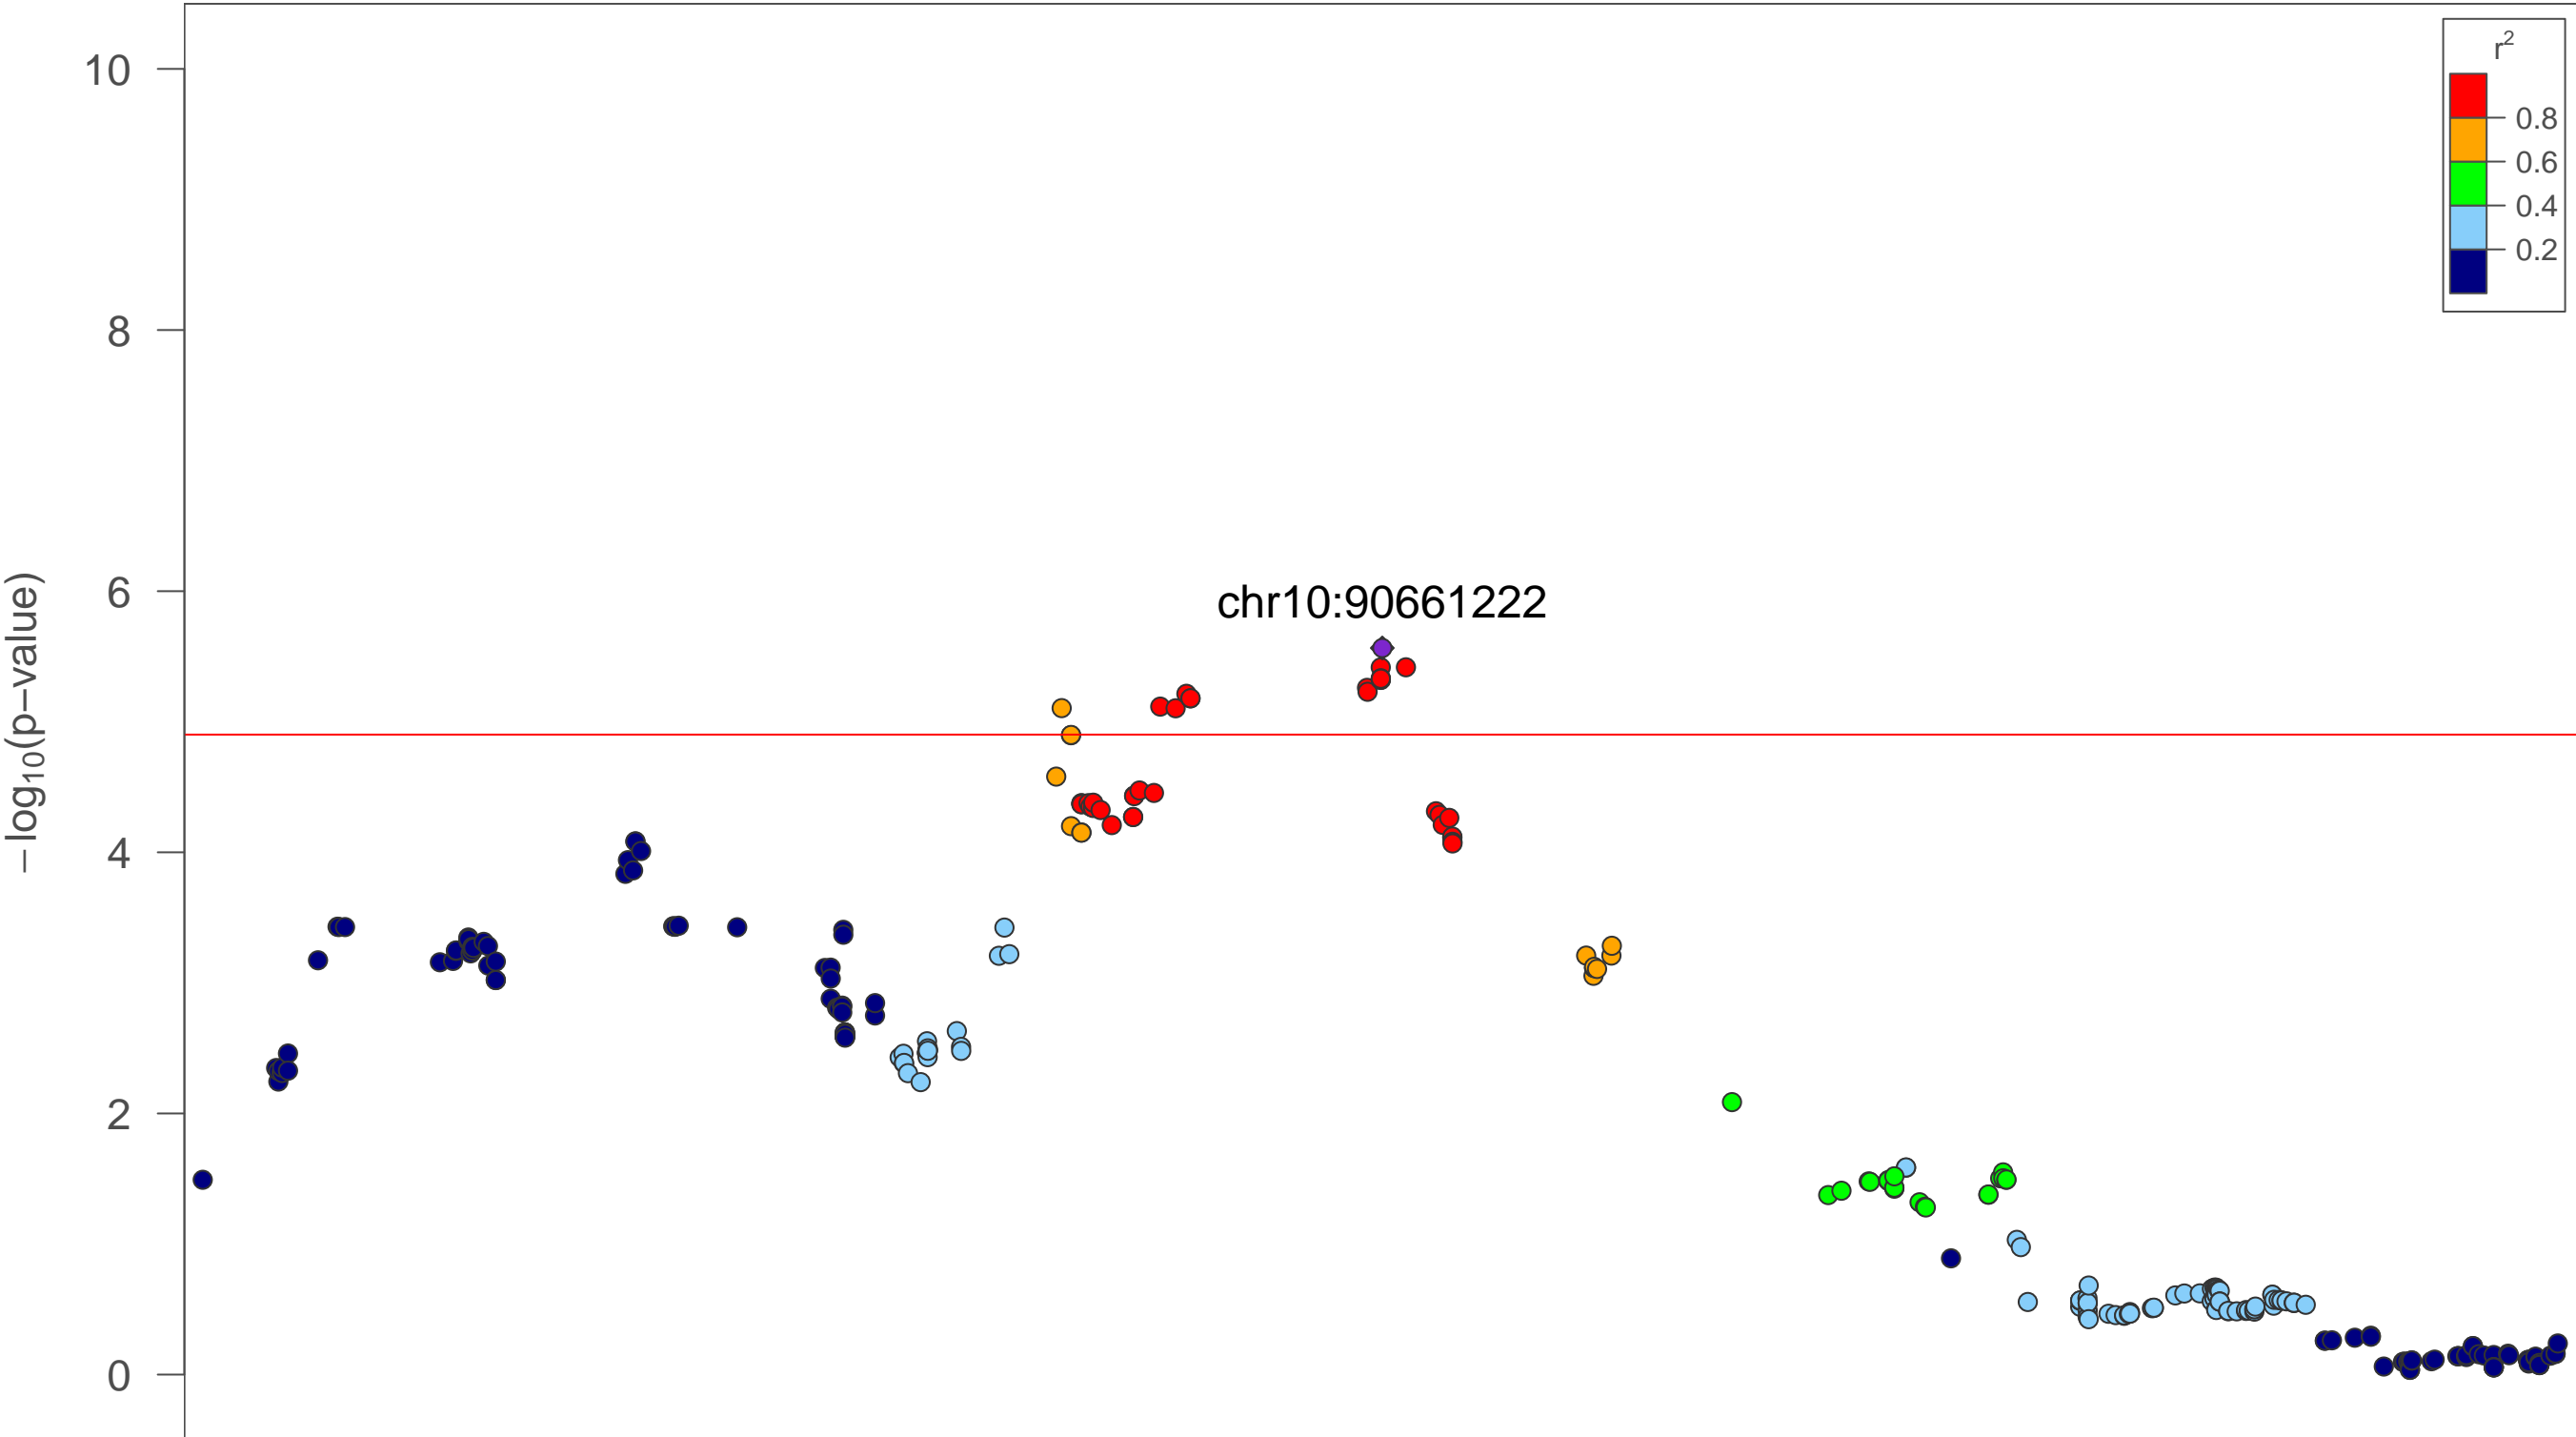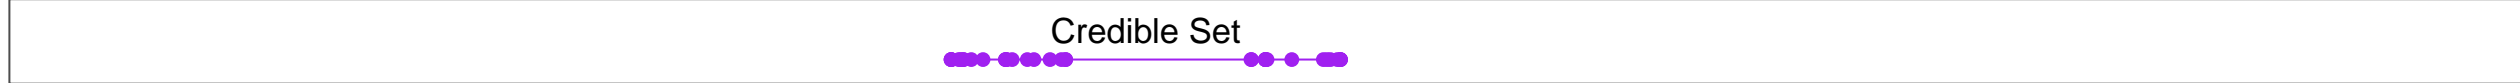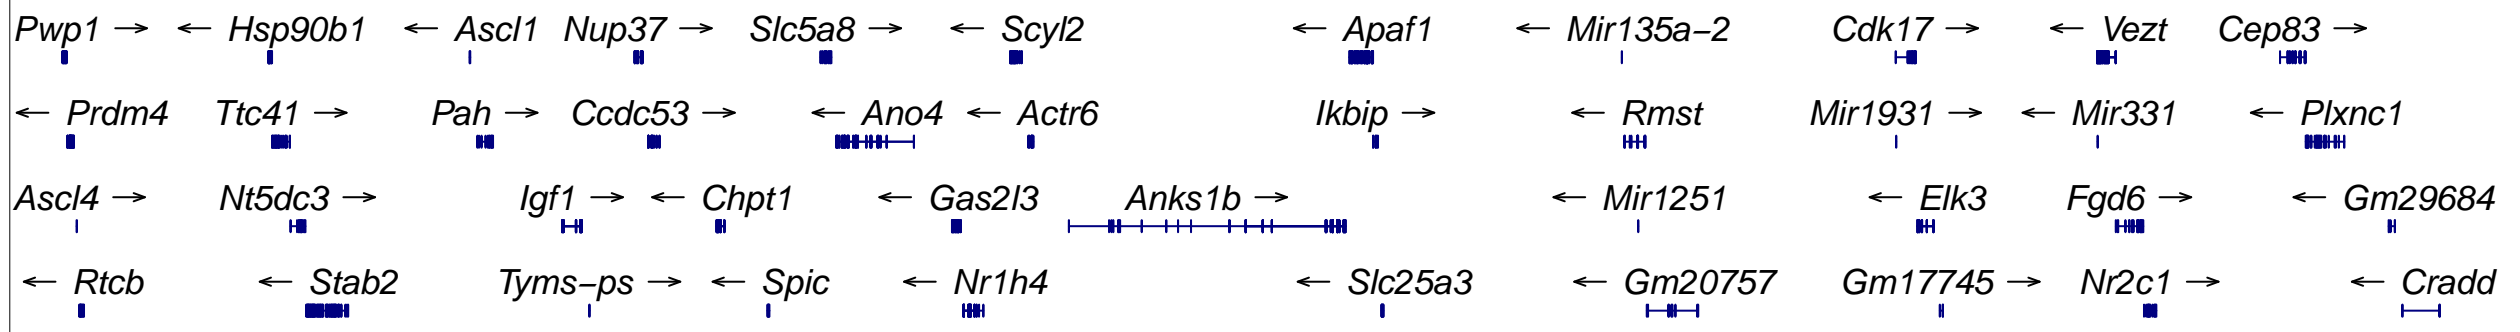

45 genes  
omitted

date: Thu Oct 25 17:24:36 2018  
build: F3943GBS  
display range: chr10:85661222–95661222 [85661222–95661222]  
hilite range: 0 – 0 [ 0 – 0 ]  
reference SNP: chr10:90661222  
number of SNPs plotted: 288  
min P-value: 2.72E–6 [chr10:90661222]  
max P-value: 9.2E–1 [chr10:94950093]  
omitted Genes: Bpifc, Fbxo7, Syn3  
omitted Genes: 4930486F22Rik, Timp3, 1810014B01Rik  
omitted Genes: 1700113H08Rik, Pmch, Parpbp  
omitted Genes: Dram1, Gnptab, Sycp3  
omitted Genes: Mybpc1, Gm4925, Arl1  
omitted Genes: Utp20, Slc17a8, 1500026H17Rik  
omitted Genes: Uhrf1bp1l, Tmpo, Nedd1  
omitted Genes: Mir7688, Lta4h, Hal  
omitted Genes: Amdhd1, Ccdc38, Snrpf  
omitted Genes: 4933408J17Rik, Ntn4, Gm8580  
omitted Genes: Gm15915, Usp44, Metap2  
omitted Genes: Ndufa12, Gm4792, Tmcc3  
omitted Genes: Mir7211, Cep83os, 2310039L15Rik  
omitted Genes: Socs2, 5730420D15Rik, Mrpl42  
omitted Genes: Ube2n, Nudt4, Mir3058

## Fine-mapping Regions

| snp            | chr | pos (Mb) | pp          | group        | color  |
|----------------|-----|----------|-------------|--------------|--------|
| chr10:89405556 | 10  | 89.40556 | 0.007778265 | Credible Set | purple |
| chr10:89405564 | 10  | 89.40556 | 0.007778265 | Credible Set | purple |
| chr10:89405589 | 10  | 89.40559 | 0.007649517 | Credible Set | purple |
| chr10:89405627 | 10  | 89.40563 | 0.007652497 | Credible Set | purple |
| chr10:89435280 | 10  | 89.43528 | 0.007793765 | Credible Set | purple |
| chr10:89443390 | 10  | 89.44339 | 0.007345316 | Credible Set | purple |
| chr10:89454154 | 10  | 89.45415 | 0.007184423 | Credible Set | purple |
| chr10:89454848 | 10  | 89.45485 | 0.007849913 | Credible Set | purple |
| chr10:89485534 | 10  | 89.48553 | 0.006939689 | Credible Set | purple |
| chr10:89532131 | 10  | 89.53213 | 0.005397014 | Credible Set | purple |
| chr10:89621284 | 10  | 89.62128 | 0.006175437 | Credible Set | purple |
| chr10:89621319 | 10  | 89.62132 | 0.006176909 | Credible Set | purple |
| chr10:89625488 | 10  | 89.62549 | 0.008845867 | Credible Set | purple |
| chr10:89625559 | 10  | 89.62556 | 0.008757609 | Credible Set | purple |
| chr10:89647994 | 10  | 89.64799 | 0.009630289 | Credible Set | purple |
| chr10:89708192 | 10  | 89.70819 | 0.009238231 | Credible Set | purple |
| chr10:89734590 | 10  | 89.73459 | 0.039442741 | Credible Set | purple |
| chr10:89798643 | 10  | 89.79864 | 0.038333385 | Credible Set | purple |
| chr10:89843657 | 10  | 89.84366 | 0.048954795 | Credible Set | purple |
| chr10:89860498 | 10  | 89.86050 | 0.045276879 | Credible Set | purple |
| chr10:89860846 | 10  | 89.86085 | 0.045378919 | Credible Set | purple |
| chr10:90597510 | 10  | 90.59751 | 0.054112353 | Credible Set | purple |
| chr10:90599690 | 10  | 90.59969 | 0.050624147 | Credible Set | purple |
| chr10:90654718 | 10  | 90.65472 | 0.076450300 | Credible Set | purple |
| chr10:90654994 | 10  | 90.65499 | 0.061975512 | Credible Set | purple |
| chr10:90654998 | 10  | 90.65500 | 0.063650490 | Credible Set | purple |
| chr10:90655002 | 10  | 90.65500 | 0.061862432 | Credible Set | purple |
| chr10:90655039 | 10  | 90.65504 | 0.063120913 | Credible Set | purple |
| chr10:90661222 | 10  | 90.66122 | 0.106070538 | Credible Set | purple |
| chr10:90759813 | 10  | 90.75981 | 0.076575883 | Credible Set | purple |
| chr10:90885383 | 10  | 90.88538 | 0.006802878 | Credible Set | purple |
| chr10:90899946 | 10  | 90.89995 | 0.006402570 | Credible Set | purple |
| chr10:90913583 | 10  | 90.91358 | 0.005417445 | Credible Set | purple |
| chr10:90940720 | 10  | 90.94072 | 0.006087540 | Credible Set | purple |
| chr10:90953385 | 10  | 90.95338 | 0.004347358 | Credible Set | purple |
| chr10:90953402 | 10  | 90.95340 | 0.004401991 | Credible Set | purple |

Fine-mapping Regions

| snp            | chr | pos (Mb) | pp          | group        | color  |
|----------------|-----|----------|-------------|--------------|--------|
| chr10:90953425 | 10  | 90.95342 | 0.004457171 | Credible Set | purple |



# F39–43 GBS, open field, immobile duration in 1st 5 minutes (s)

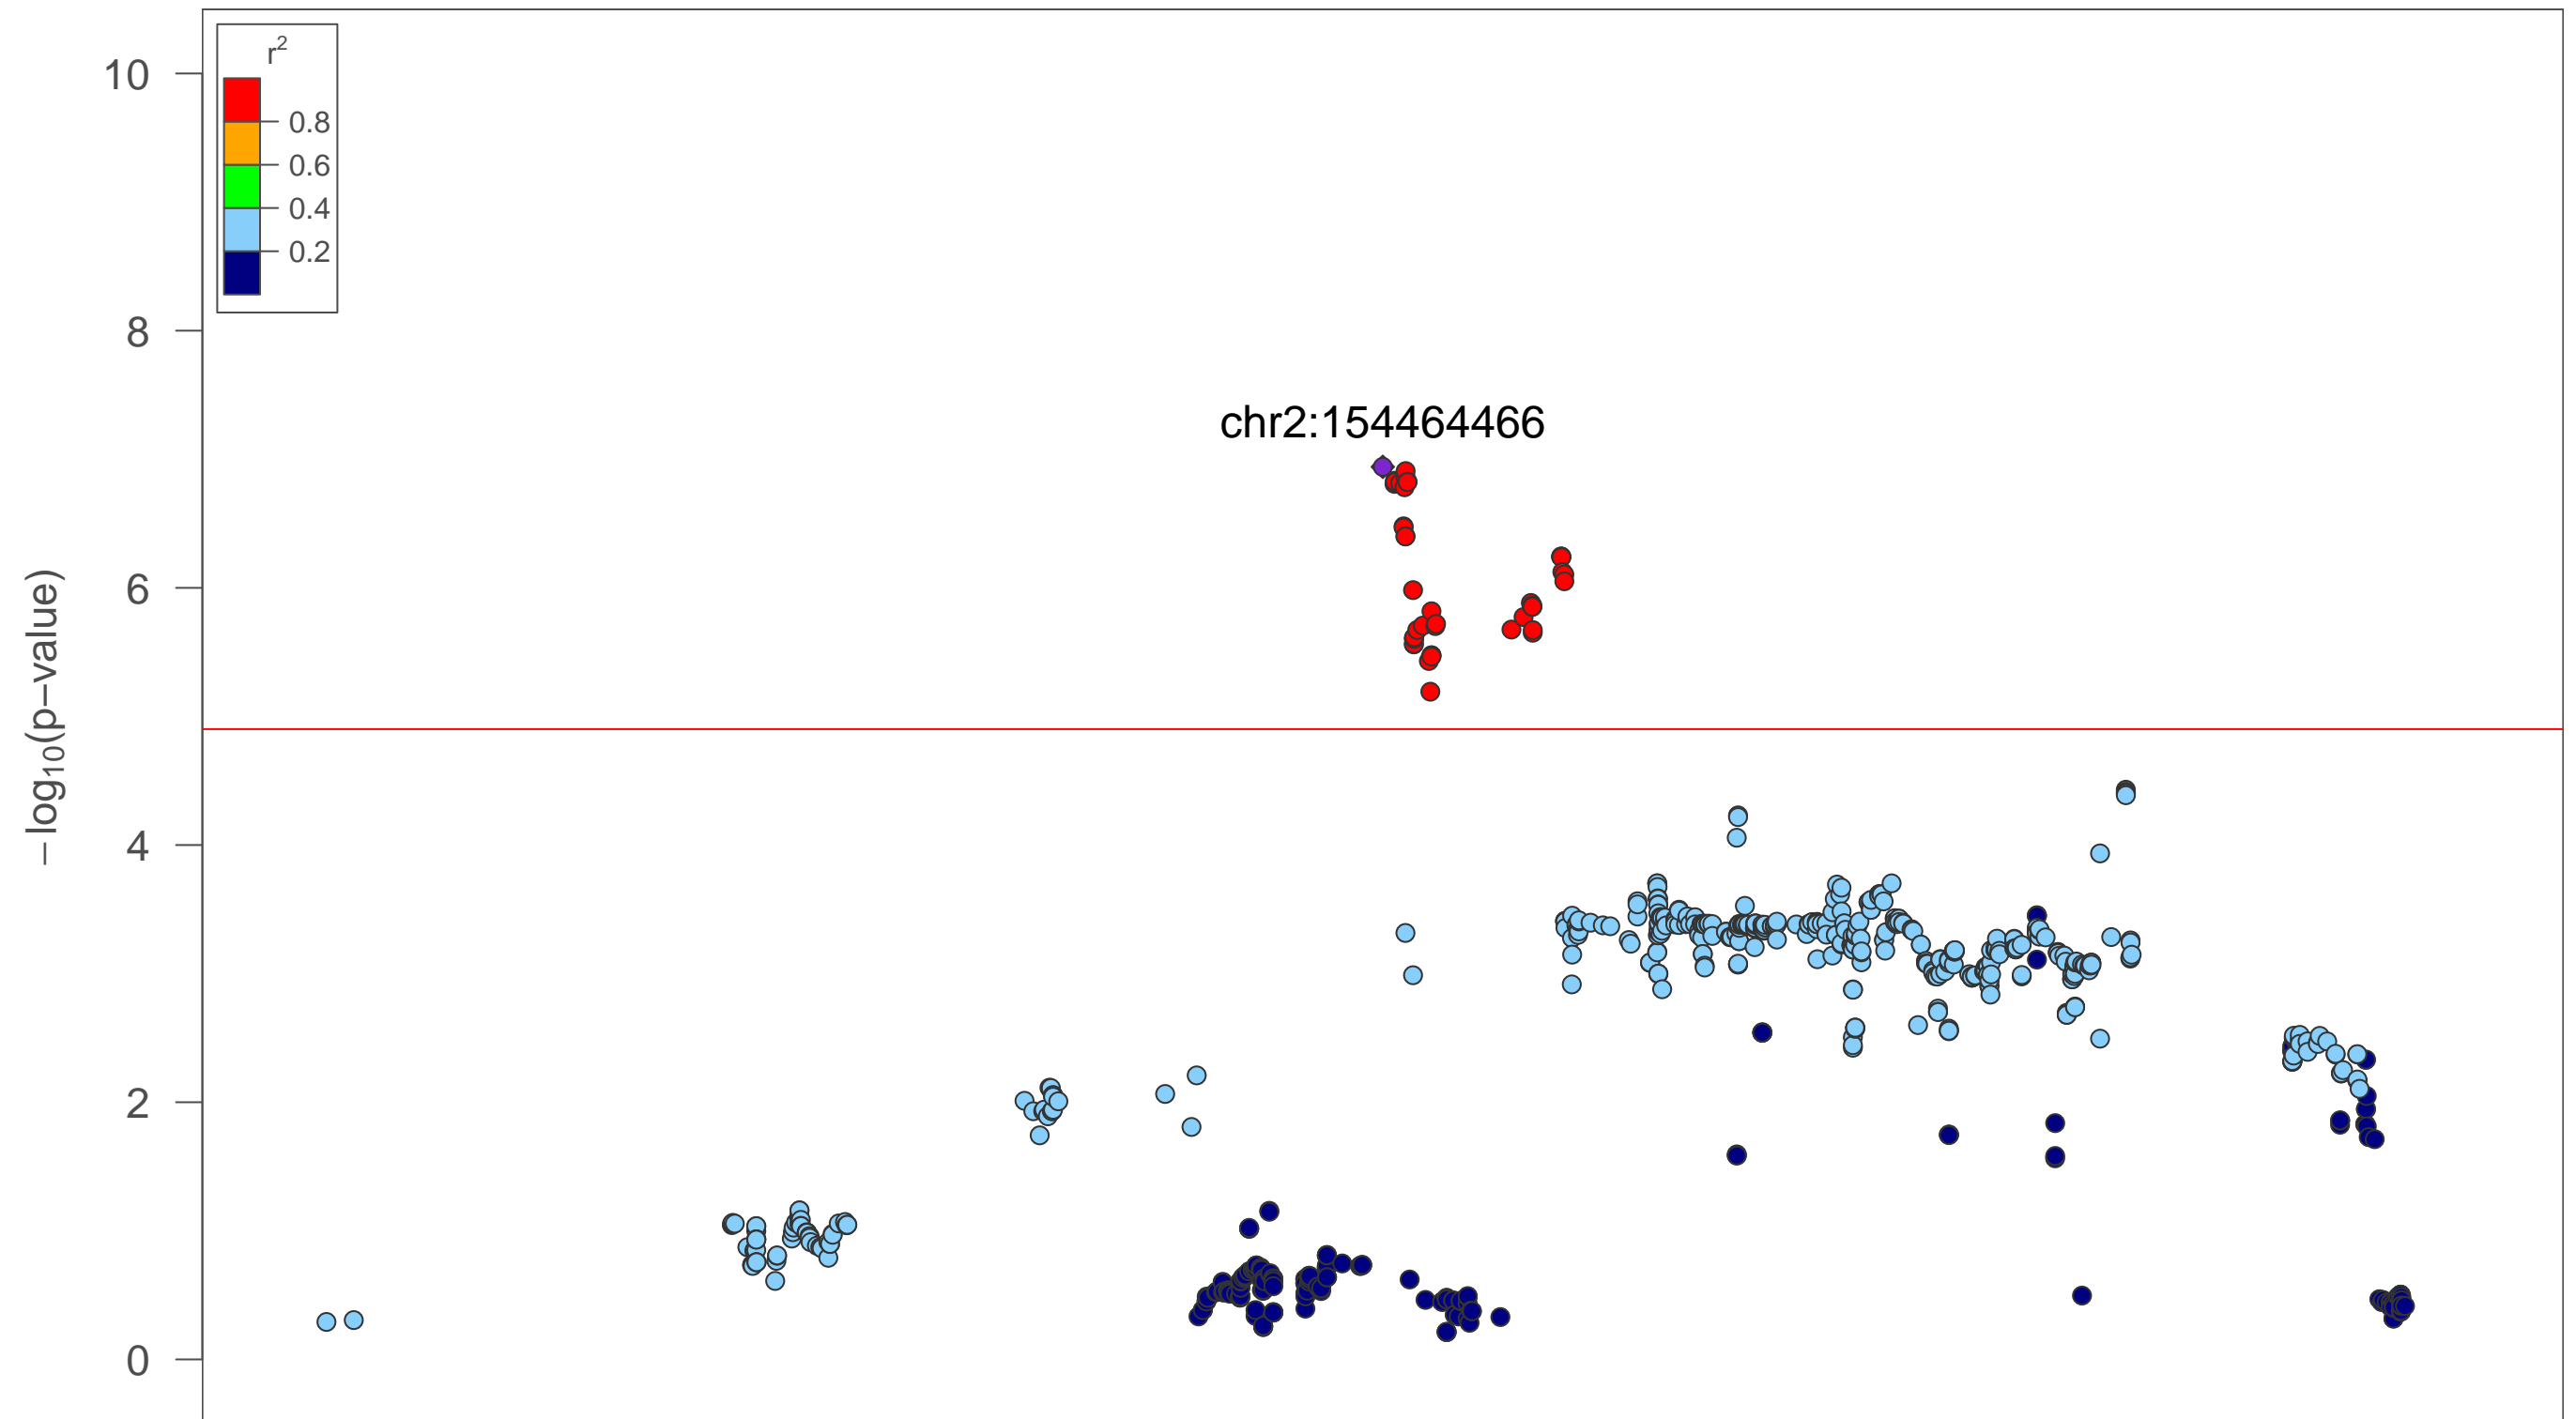

Credible Set

*Syndig1* → ← *Vsx1* *Nsfl1c* → *Tbc1d20* → *Xkr7* → *Mapre1* → ← *Necab3* ← *Pigu* ← *Gdf5* *Aar2* → ← *Rbl1* *Vstm2l* → *Actr5* →  
 ← *Zfp120* *Pygb* → *Fkbp1a* → ← *Rbck1* *Ttl9* → *Dnmt3b* → ← *Snta1* *a* → ← *Ggt7* ← *Nfs1* *Myl9* → *Src* → ← *Tti1* *Ppp1r16b* →  
*Gm14139* → ← *Ninl* ← *Snph* ← *Trib3* ← *Pdrg1* *Efcab8* → *Actl10* → *Itch* → *Procr* → *Epb41l1* → ← *Mroh8* *Rprd1b* → *Dhx35* →  
*Zfp937* → *Gins1* → ← *Rad21l* ← *Nrsn2* *Ccm2l* → ← *Sun5* ← *E2f1* *Dynlrb1* → *Ergic3* → *Tgif2* → ← *Blcap* *Bpi* →

145 genes  
omitted

Position on chr2 (Mb)

date: Thu Oct 25 17:24:08 2018

build: F3943GBS

display range: chr2:149464466–159464466 [149464466–159464466]

hilite range: 0 – 0 [ 0 – 0 ]

reference SNP: chr2:154464466

number of SNPs plotted: 757

min P-value: 1.15E–7 [chr2:154464466]

max P-value: 6.13E–1 [chr2:154734707]

omitted Genes: Gm14124, 3300002I08Rik, Zfp442

omitted Genes: Zfp345, Cst7, Apmap

omitted Genes: Acss1, E130215H24Rik, Entpd6

omitted Genes: Abhd12, Nanp, Gm14151

omitted Genes: 4930442J19Rik, LOC100125594, 4921509C19Rik

omitted Genes: Sdcbp2, Tmem74b, Psmf1

omitted Genes: Rspo4, Angpt4, Mir1953

omitted Genes: Fam110a, Slc52a3, Scrt2

omitted Genes: Srxn1, Tcf15, Csnk2a1

omitted Genes: Gm14164, Sox12, Zcchc3

omitted Genes: 6820408C15Rik, Defb23, Defb20

omitted Genes: Defb22, Defb26, Defb28

omitted Genes: Defb29, Defb21, Defb19

omitted Genes: Defb45, Defb36, Defb25

omitted Genes: Rem1, H13, Mcts2

omitted Genes: Id1, Cox4i2, Bcl2l1

omitted Genes: Tpx2, Mir5622, Mylk2

omitted Genes: Foxs1, Dusp15, Hck

omitted Genes: Tm9sf4, Tspyl3, Plagl2

omitted Genes: Pofut1, Kif3b, 2500004C02Rik

omitted Genes: Asxl1, Nol4l, Commd7

omitted Genes: Bpifb2, Bpifb6, Bpifb3

omitted Genes: Bpifb4, Bpifa6, Bpifa2

omitted Genes: Bpifa3, Bpifa1, Bpifa5

omitted Genes: Bpifb1, Bpifb5, Bpifb9a

omitted Genes: Bpifb9b, Cdk5rap1, Cbfa2t2

omitted Genes: 1700003F12Rik, Pxmp4, Zfp341

omitted Genes: Chmp4b, Raly, Eif2s2

omitted Genes: Ahcy, 2310005A03Rik, Map1lc3a

omitted Genes: Mir695, Trp53inp2, Ncoa6

omitted Genes: Acss2, Acss2os, Gss

omitted Genes: Myh7b, Mir499, Trnc4ap

Make more plots at <http://csg.sph.umich.edu/locuszoom/>

## Fine-mapping Regions

| snp            | chr | pos (Mb) | pp          | group        | color  |
|----------------|-----|----------|-------------|--------------|--------|
| chr2:154464466 | 2   | 154.4645 | 0.077380251 | Credible Set | purple |
| chr2:154513996 | 2   | 154.5140 | 0.057628986 | Credible Set | purple |
| chr2:154515752 | 2   | 154.5158 | 0.060925709 | Credible Set | purple |
| chr2:154516249 | 2   | 154.5162 | 0.059631478 | Credible Set | purple |
| chr2:154537995 | 2   | 154.5380 | 0.058400539 | Credible Set | purple |
| chr2:154538009 | 2   | 154.5380 | 0.058348012 | Credible Set | purple |
| chr2:154552607 | 2   | 154.5526 | 0.027660183 | Credible Set | purple |
| chr2:154552612 | 2   | 154.5526 | 0.027063118 | Credible Set | purple |
| chr2:154556468 | 2   | 154.5565 | 0.054353119 | Credible Set | purple |
| chr2:154560354 | 2   | 154.5604 | 0.023289374 | Credible Set | purple |
| chr2:154560360 | 2   | 154.5604 | 0.023197502 | Credible Set | purple |
| chr2:154560680 | 2   | 154.5607 | 0.064741829 | Credible Set | purple |
| chr2:154561127 | 2   | 154.5611 | 0.071957422 | Credible Set | purple |
| chr2:154569018 | 2   | 154.5690 | 0.059729276 | Credible Set | purple |
| chr2:154569036 | 2   | 154.5690 | 0.059430630 | Credible Set | purple |
| chr2:154592528 | 2   | 154.5925 | 0.009192320 | Credible Set | purple |
| chr2:154595741 | 2   | 154.5957 | 0.004013589 | Credible Set | purple |
| chr2:154595774 | 2   | 154.5958 | 0.003612895 | Credible Set | purple |
| chr2:154596294 | 2   | 154.5963 | 0.003638474 | Credible Set | purple |
| chr2:154597124 | 2   | 154.5971 | 0.003979535 | Credible Set | purple |
| chr2:154597483 | 2   | 154.5975 | 0.004092658 | Credible Set | purple |
| chr2:154610318 | 2   | 154.6103 | 0.004630510 | Credible Set | purple |
| chr2:154633945 | 2   | 154.6339 | 0.004990385 | Credible Set | purple |
| chr2:154670525 | 2   | 154.6705 | 0.002992188 | Credible Set | purple |
| chr2:154670528 | 2   | 154.6705 | 0.002995686 | Credible Set | purple |
| chr2:154670571 | 2   | 154.6706 | 0.006387038 | Credible Set | purple |
| chr2:154686815 | 2   | 154.6868 | 0.004948734 | Credible Set | purple |
| chr2:154689824 | 2   | 154.6898 | 0.005134110 | Credible Set | purple |
| chr2:155009299 | 2   | 155.0093 | 0.004663011 | Credible Set | purple |
| chr2:155060609 | 2   | 155.0606 | 0.005778488 | Credible Set | purple |
| chr2:155091628 | 2   | 155.0916 | 0.007372176 | Credible Set | purple |
| chr2:155097606 | 2   | 155.0976 | 0.007059231 | Credible Set | purple |
| chr2:155097628 | 2   | 155.0976 | 0.006897689 | Credible Set | purple |
| chr2:155097650 | 2   | 155.0976 | 0.006904636 | Credible Set | purple |
| chr2:155099477 | 2   | 155.0995 | 0.004414824 | Credible Set | purple |
| chr2:155099522 | 2   | 155.0995 | 0.004621923 | Credible Set | purple |

Fine-mapping Regions

| snp            | chr | pos (Mb) | pp         | group        | color  |
|----------------|-----|----------|------------|--------------|--------|
| chr2:155220007 | 2   | 155.2200 | 0.01639115 | Credible Set | purple |
| chr2:155220040 | 2   | 155.2200 | 0.01639115 | Credible Set | purple |
| chr2:155220051 | 2   | 155.2201 | 0.01639115 | Credible Set | purple |
| chr2:155220725 | 2   | 155.2207 | 0.01621069 | Credible Set | purple |
| chr2:155224800 | 2   | 155.2248 | 0.01256823 | Credible Set | purple |
| chr2:155233215 | 2   | 155.2332 | 0.01202755 | Credible Set | purple |
| chr2:155233265 | 2   | 155.2333 | 0.01070872 | Credible Set | purple |

# F39–43 GBS, open field, immobile duration in 1st 5 minutes (s)

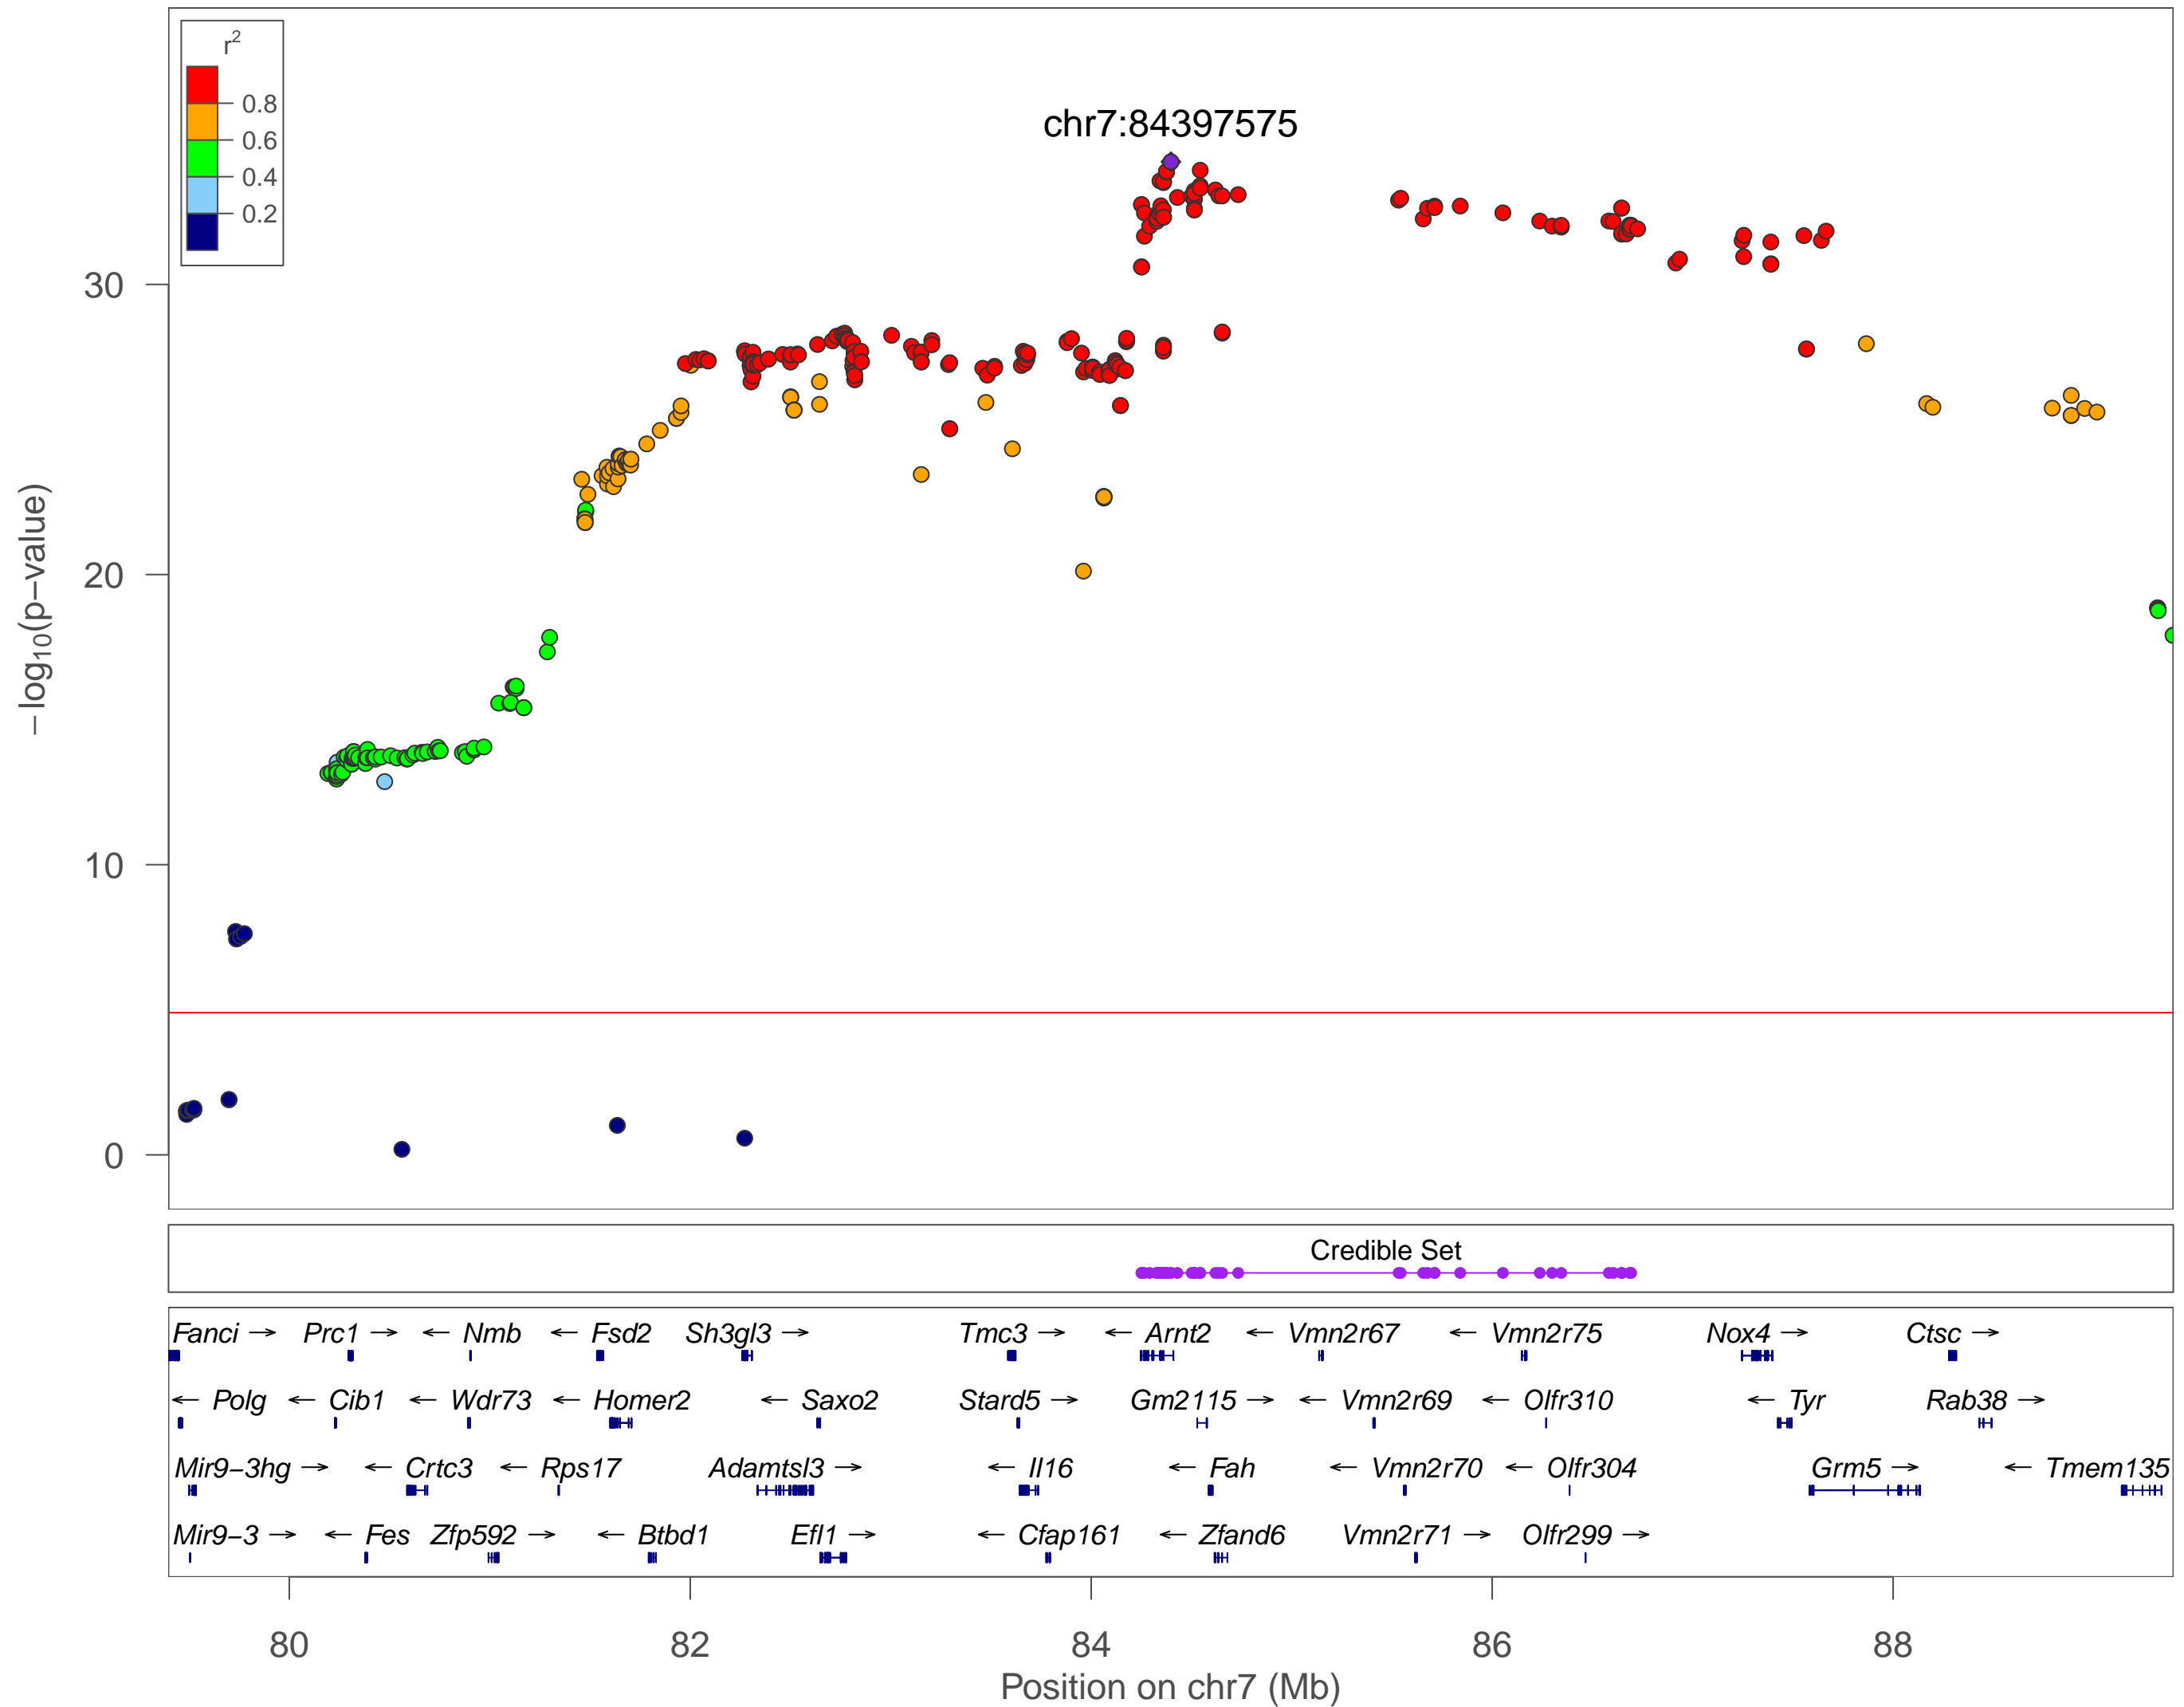

date: Thu Oct 25 17:24:18 2018  
build: F3943GBS  
display range: chr7:79397575–89397575 [79397575–89397575]  
hilite range: 0 – 0 [ 0 – 0 ]  
reference SNP: chr7:84397575  
number of SNPs plotted: 396  
min P-value: 5.92E–35 [chr7:84397575]  
max P-value: 6.44E–1 [chr7:80561830]  
omitted Genes: Rhcg, Ticrr, Kif7  
omitted Genes: Plin1, Pex11a, Wdr93  
omitted Genes: Mesp1, Mesp2, Anpep  
omitted Genes: Ap3s2, Arpin, Zfp710  
omitted Genes: Gm21057, Idh2, Sema4b  
omitted Genes: Gdpgp1, Tll13, Ngrn  
omitted Genes: Vps33b, Rccd1, Unc45a  
omitted Genes: Hddc3, Man2a2, Furin  
omitted Genes: Blm, Gm15880, Iqgap1  
omitted Genes: Zscan2, Sec11a, Alpk3  
omitted Genes: Slc28a1, Pde8a, Cpeb1  
omitted Genes: Ap3b2, BC048679, 2900076A07Rik  
omitted Genes: Mir1839, Whamm, Fam103a1  
omitted Genes: 3110040N11Rik, Tm6sf1, Hdgfrp3  
omitted Genes: Bnc1, Gm20744, 4933406J10Rik  
omitted Genes: Mex3b, 4933430H16Rik, Mesdc1  
omitted Genes: Mesdc2, Cemip, Abhd17c  
omitted Genes: 2610206C17Rik, Olfr291, Olfr290  
omitted Genes: Vmn2r65, Vmn2r66, Vmn2r68  
omitted Genes: Vmn2r72, Vmn2r73, Vmn2r74  
omitted Genes: Vmn2r76, Olfr309, Olfr308  
omitted Genes: Olfr307, Olfr305, Olfr303  
omitted Genes: Olfr301, Olfr298, Olfr297  
omitted Genes: Olfr295, Olfr294, Olfr293  
omitted Genes: Olfr292, Folh1, Vmn2r77  
omitted Genes: Vmn2r78, Vmn2r79

## Fine-mapping Regions

| snp           | chr | pos (Mb) | pp           | group        | color  |
|---------------|-----|----------|--------------|--------------|--------|
| chr7:84250985 | 7   | 84.25099 | 0.0052463340 | Credible Set | purple |
| chr7:84251011 | 7   | 84.25101 | 0.0053700774 | Credible Set | purple |
| chr7:84265685 | 7   | 84.26569 | 0.0027673352 | Credible Set | purple |
| chr7:84291540 | 7   | 84.29154 | 0.0009713545 | Credible Set | purple |
| chr7:84327288 | 7   | 84.32729 | 0.0014225509 | Credible Set | purple |
| chr7:84327808 | 7   | 84.32781 | 0.0020139860 | Credible Set | purple |
| chr7:84327850 | 7   | 84.32785 | 0.0017832356 | Credible Set | purple |
| chr7:84338595 | 7   | 84.33859 | 0.0027256758 | Credible Set | purple |
| chr7:84343118 | 7   | 84.34312 | 0.0345440729 | Credible Set | purple |
| chr7:84344805 | 7   | 84.34480 | 0.0036057811 | Credible Set | purple |
| chr7:84347423 | 7   | 84.34742 | 0.0048578487 | Credible Set | purple |
| chr7:84360038 | 7   | 84.36004 | 0.0035380346 | Credible Set | purple |
| chr7:84360626 | 7   | 84.36063 | 0.0019959784 | Credible Set | purple |
| chr7:84360642 | 7   | 84.36064 | 0.0019619519 | Credible Set | purple |
| chr7:84360703 | 7   | 84.36070 | 0.0302445200 | Credible Set | purple |
| chr7:84360714 | 7   | 84.36071 | 0.0327604981 | Credible Set | purple |
| chr7:84360716 | 7   | 84.36072 | 0.0327604981 | Credible Set | purple |
| chr7:84375526 | 7   | 84.37553 | 0.0716098398 | Credible Set | purple |
| chr7:84375577 | 7   | 84.37558 | 0.0682758895 | Credible Set | purple |
| chr7:84375642 | 7   | 84.37564 | 0.0728765690 | Credible Set | purple |
| chr7:84397575 | 7   | 84.39758 | 0.1562491568 | Credible Set | purple |
| chr7:84397597 | 7   | 84.39760 | 0.1519139229 | Credible Set | purple |
| chr7:84430102 | 7   | 84.43010 | 0.0093372654 | Credible Set | purple |
| chr7:84501082 | 7   | 84.50108 | 0.0104880653 | Credible Set | purple |
| chr7:84514082 | 7   | 84.51408 | 0.0157884220 | Credible Set | purple |
| chr7:84514444 | 7   | 84.51444 | 0.0081297329 | Credible Set | purple |
| chr7:84514505 | 7   | 84.51450 | 0.0081344474 | Credible Set | purple |
| chr7:84514564 | 7   | 84.51456 | 0.0039338436 | Credible Set | purple |
| chr7:84514575 | 7   | 84.51457 | 0.0034559980 | Credible Set | purple |
| chr7:84514734 | 7   | 84.51473 | 0.0129532981 | Credible Set | purple |
| chr7:84543346 | 7   | 84.54335 | 0.0235612271 | Credible Set | purple |
| chr7:84543355 | 7   | 84.54336 | 0.0195719118 | Credible Set | purple |
| chr7:84543782 | 7   | 84.54378 | 0.0800154583 | Credible Set | purple |
| chr7:84619632 | 7   | 84.61963 | 0.0169651351 | Credible Set | purple |
| chr7:84636759 | 7   | 84.63676 | 0.0106453849 | Credible Set | purple |
| chr7:84653095 | 7   | 84.65309 | 0.0105528889 | Credible Set | purple |

Fine-mapping Regions

| snp           | chr | pos (Mb) | pp           | group        | color  |
|---------------|-----|----------|--------------|--------------|--------|
| chr7:84733186 | 7   | 84.73319 | 0.0117010324 | Credible Set | purple |
| chr7:85533207 | 7   | 85.53321 | 0.0075770159 | Credible Set | purple |
| chr7:85543843 | 7   | 85.54384 | 0.0088065401 | Credible Set | purple |
| chr7:85656243 | 7   | 85.65624 | 0.0017286559 | Credible Set | purple |
| chr7:85677494 | 7   | 85.67749 | 0.0039911693 | Credible Set | purple |
| chr7:85712663 | 7   | 85.71266 | 0.0047372285 | Credible Set | purple |
| chr7:85712975 | 7   | 85.71298 | 0.0042050829 | Credible Set | purple |
| chr7:85840665 | 7   | 85.84067 | 0.0047691707 | Credible Set | purple |
| chr7:86053386 | 7   | 86.05339 | 0.0027882394 | Credible Set | purple |
| chr7:86237374 | 7   | 86.23737 | 0.0014626507 | Credible Set | purple |
| chr7:86298979 | 7   | 86.29898 | 0.0009803139 | Credible Set | purple |
| chr7:86344488 | 7   | 86.34449 | 0.0010427187 | Credible Set | purple |
| chr7:86582139 | 7   | 86.58214 | 0.0014691844 | Credible Set | purple |
| chr7:86603770 | 7   | 86.60377 | 0.0014033521 | Credible Set | purple |
| chr7:86645719 | 7   | 86.64572 | 0.0040095552 | Credible Set | purple |
| chr7:86645792 | 7   | 86.64579 | 0.0040968628 | Credible Set | purple |
| chr7:86685648 | 7   | 86.68565 | 0.0010582767 | Credible Set | purple |
| chr7:86692214 | 7   | 86.69221 | 0.0010525011 | Credible Set | purple |
| chr7:86692491 | 7   | 86.69249 | 0.0009860399 | Credible Set | purple |



F39–43 GBS, open field, distance moved in total in 10 minutes (cm)

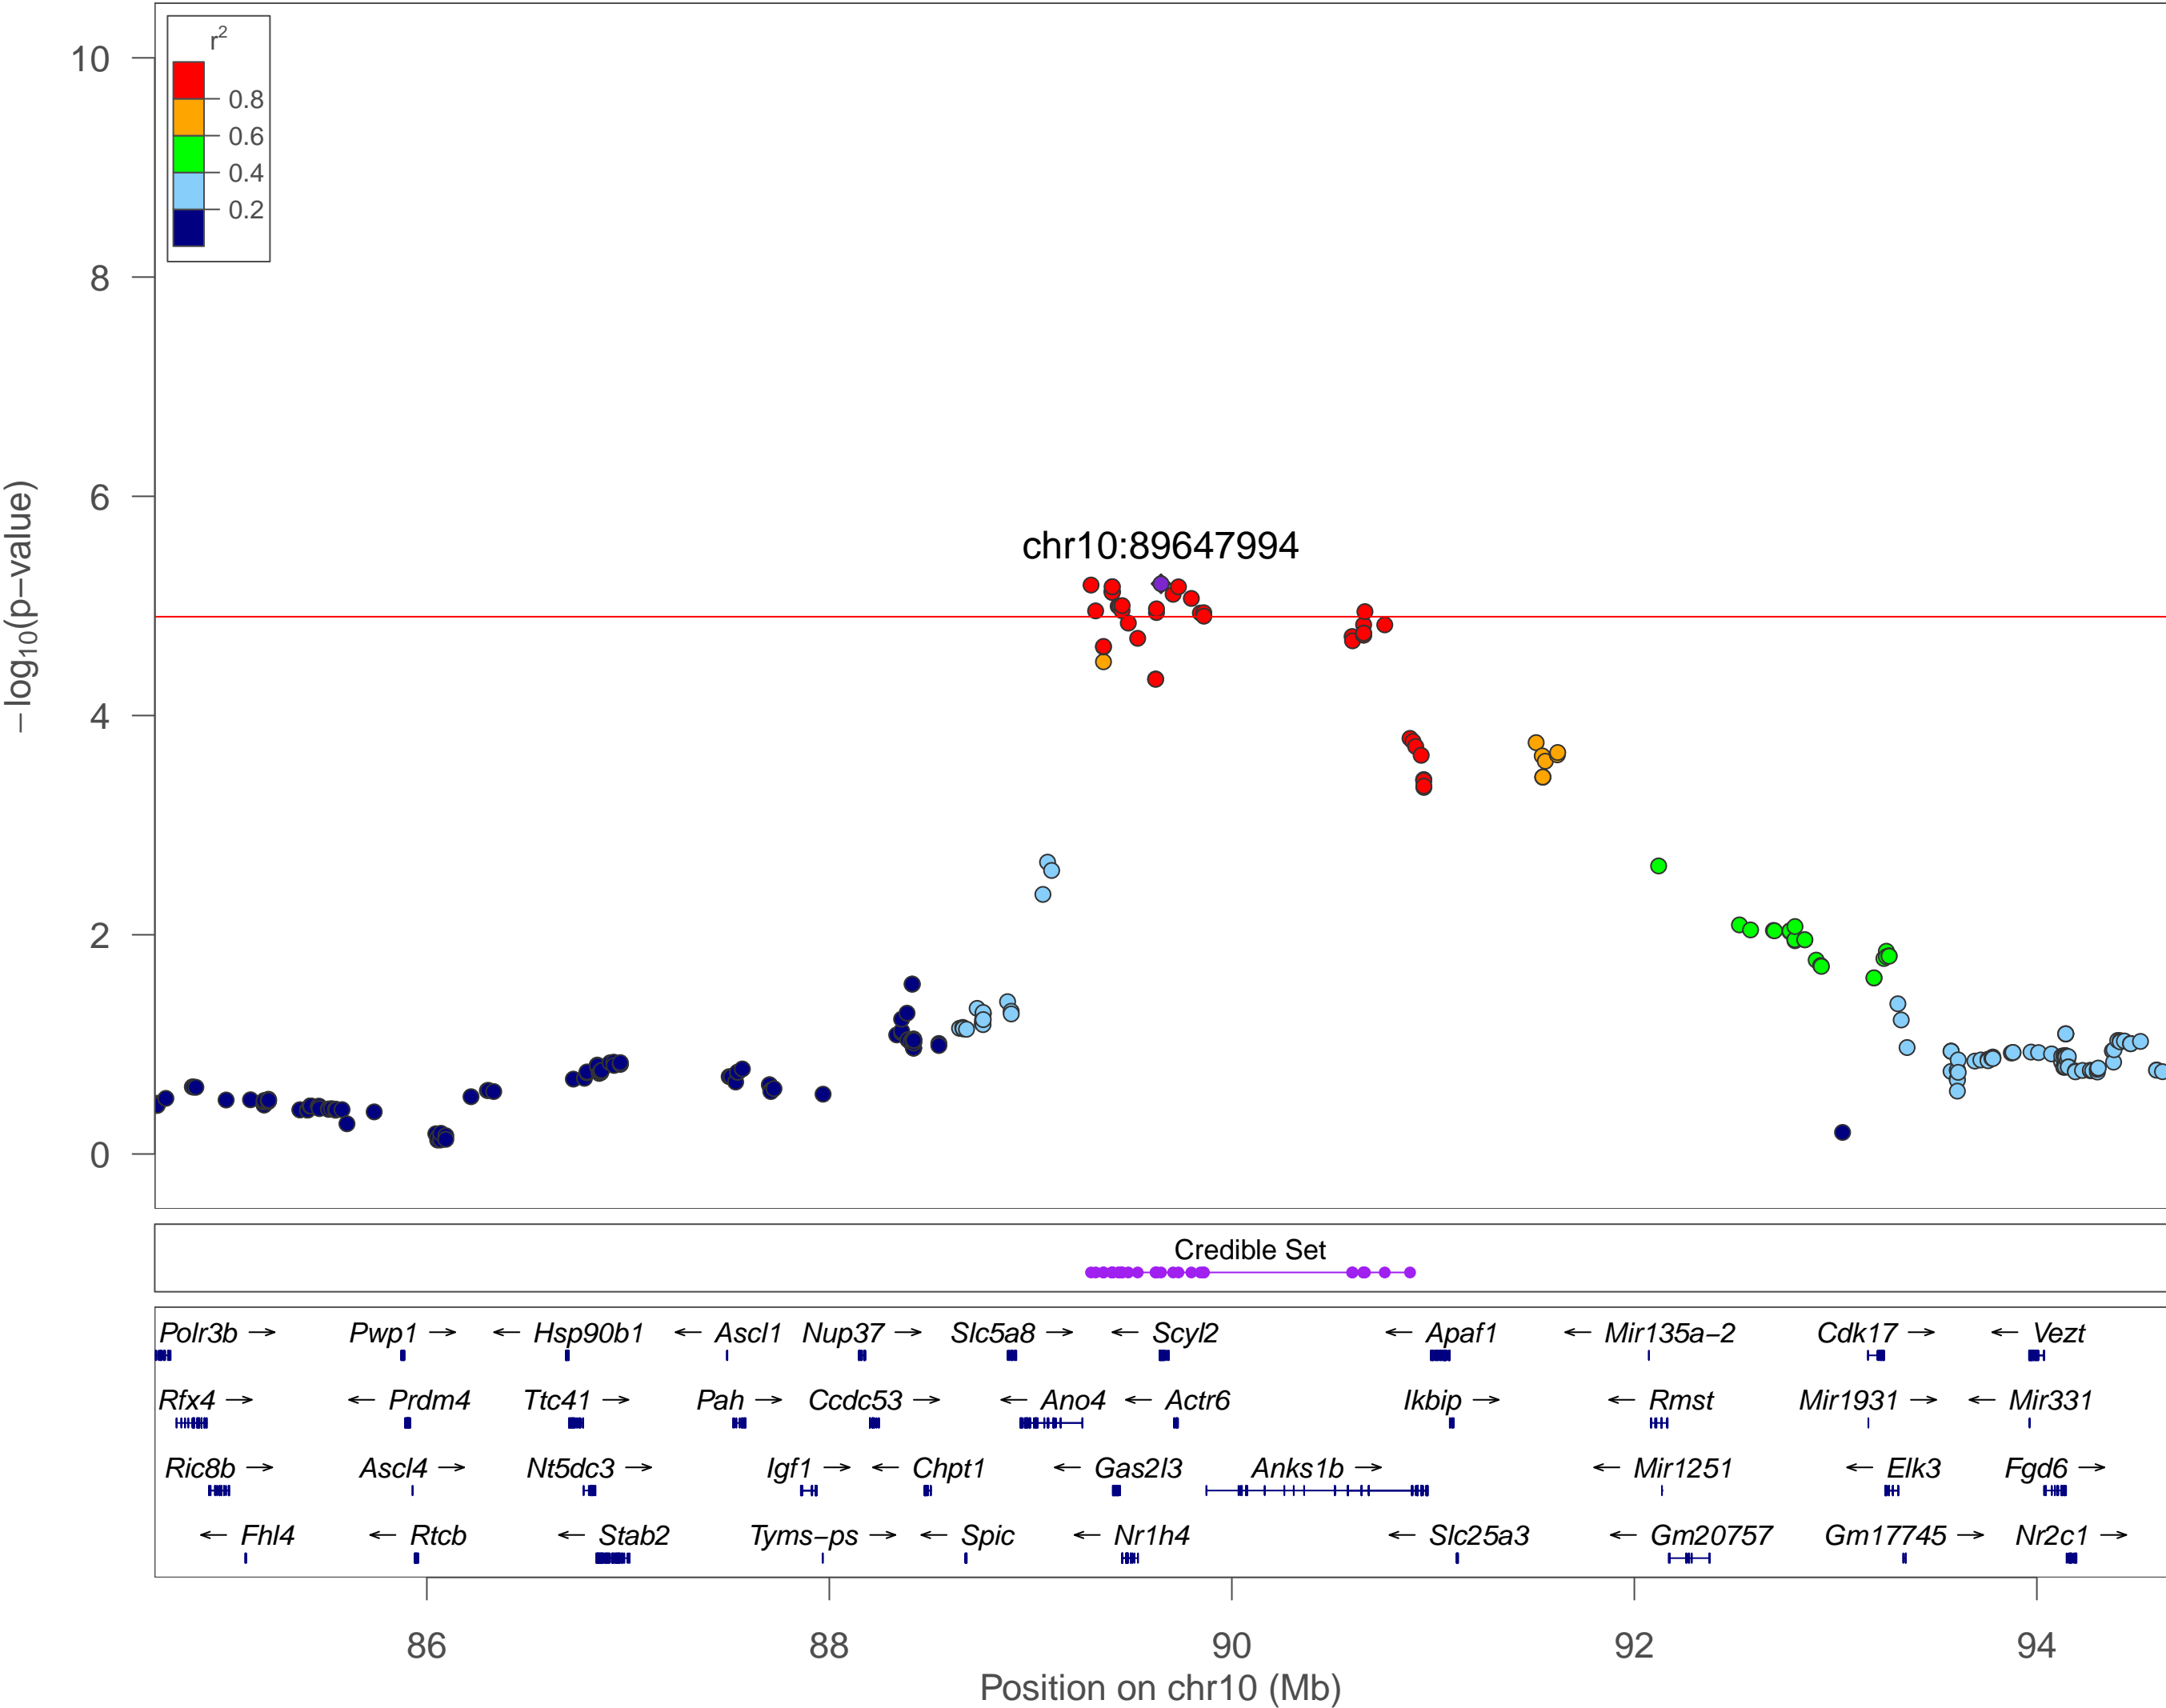

date: Thu Oct 25 17:23:20 2018  
build: F3943GBS  
display range: chr10:84647994–94647994 [84647994–94647994]  
hilite range: 0 – 0 [ 0 – 0 ]  
reference SNP: chr10:89647994  
number of SNPs plotted: 282  
min P-value: 6.28E–6 [chr10:89647994]  
max P-value: 7.46E–1 [chr10:86053984]  
omitted Genes: Tmem263, Mterf2, Cry1  
omitted Genes: Btbd11, Bpifc, Fbxo7  
omitted Genes: Syn3, 4930486F22Rik, Timp3  
omitted Genes: 1810014B01Rik, 1700113H08Rik, Pmch  
omitted Genes: Parpbp, Dram1, Gnptab  
omitted Genes: Sycp3, Mybpc1, Gm4925  
omitted Genes: Arl1, Utp20, Slc17a8  
omitted Genes: 1500026H17Rik, Uhrf1bp1l, Tmpo  
omitted Genes: Nedd1, Mir7688, Lta4h  
omitted Genes: Hal, Amdhd1, Ccdc38  
omitted Genes: Snrpf, 4933408J17Rik, Ntn4  
omitted Genes: Gm8580, Gm15915, Usp44  
omitted Genes: Metap2, Ndufa12, Gm4792  
omitted Genes: Tmcc3, Mir7211

## Fine-mapping Regions

| snp            | chr | pos (Mb) | pp          | group        | color  |
|----------------|-----|----------|-------------|--------------|--------|
| chr10:89300286 | 10  | 89.30029 | 0.046195711 | Credible Set | purple |
| chr10:89323084 | 10  | 89.32308 | 0.027506654 | Credible Set | purple |
| chr10:89362102 | 10  | 89.36210 | 0.013374071 | Credible Set | purple |
| chr10:89362162 | 10  | 89.36216 | 0.013495842 | Credible Set | purple |
| chr10:89405522 | 10  | 89.40552 | 0.040687353 | Credible Set | purple |
| chr10:89405533 | 10  | 89.40553 | 0.040386541 | Credible Set | purple |
| chr10:89405556 | 10  | 89.40556 | 0.039848670 | Credible Set | purple |
| chr10:89405564 | 10  | 89.40556 | 0.039848670 | Credible Set | purple |
| chr10:89405589 | 10  | 89.40559 | 0.044574853 | Credible Set | purple |
| chr10:89405627 | 10  | 89.40563 | 0.044658488 | Credible Set | purple |
| chr10:89435280 | 10  | 89.43528 | 0.030235851 | Credible Set | purple |
| chr10:89443390 | 10  | 89.44339 | 0.029877098 | Credible Set | purple |
| chr10:89454154 | 10  | 89.45415 | 0.027594433 | Credible Set | purple |
| chr10:89454848 | 10  | 89.45485 | 0.030576768 | Credible Set | purple |
| chr10:89485534 | 10  | 89.48553 | 0.021521170 | Credible Set | purple |
| chr10:89532131 | 10  | 89.53213 | 0.015870127 | Credible Set | purple |
| chr10:89621284 | 10  | 89.62128 | 0.007052658 | Credible Set | purple |
| chr10:89621319 | 10  | 89.62132 | 0.007003513 | Credible Set | purple |
| chr10:89625488 | 10  | 89.62549 | 0.026605413 | Credible Set | purple |
| chr10:89625559 | 10  | 89.62556 | 0.028651320 | Credible Set | purple |
| chr10:89647994 | 10  | 89.64799 | 0.047396078 | Credible Set | purple |
| chr10:89708192 | 10  | 89.70819 | 0.038350982 | Credible Set | purple |
| chr10:89734590 | 10  | 89.73459 | 0.044560120 | Credible Set | purple |
| chr10:89798643 | 10  | 89.79864 | 0.035307665 | Credible Set | purple |
| chr10:89843657 | 10  | 89.84366 | 0.026328612 | Credible Set | purple |
| chr10:89860498 | 10  | 89.86050 | 0.026503471 | Credible Set | purple |
| chr10:89860846 | 10  | 89.86085 | 0.024741475 | Credible Set | purple |
| chr10:90597510 | 10  | 90.59751 | 0.016448636 | Credible Set | purple |
| chr10:90599690 | 10  | 90.59969 | 0.015101222 | Credible Set | purple |
| chr10:90654718 | 10  | 90.65472 | 0.020831486 | Credible Set | purple |
| chr10:90654994 | 10  | 90.65499 | 0.016918577 | Credible Set | purple |
| chr10:90654998 | 10  | 90.65500 | 0.017341253 | Credible Set | purple |
| chr10:90655002 | 10  | 90.65500 | 0.016952658 | Credible Set | purple |
| chr10:90655039 | 10  | 90.65504 | 0.017621113 | Credible Set | purple |
| chr10:90661222 | 10  | 90.66122 | 0.027101088 | Credible Set | purple |
| chr10:90759813 | 10  | 90.75981 | 0.020780488 | Credible Set | purple |

Fine-mapping Regions

| snp            | chr | pos (Mb) | pp          | group        | color  |
|----------------|-----|----------|-------------|--------------|--------|
| chr10:90885383 | 10  | 90.88538 | 0.002169931 | Credible Set | purple |

F39–43 GBS, open field, distance moved in total in 10 minutes (cm)

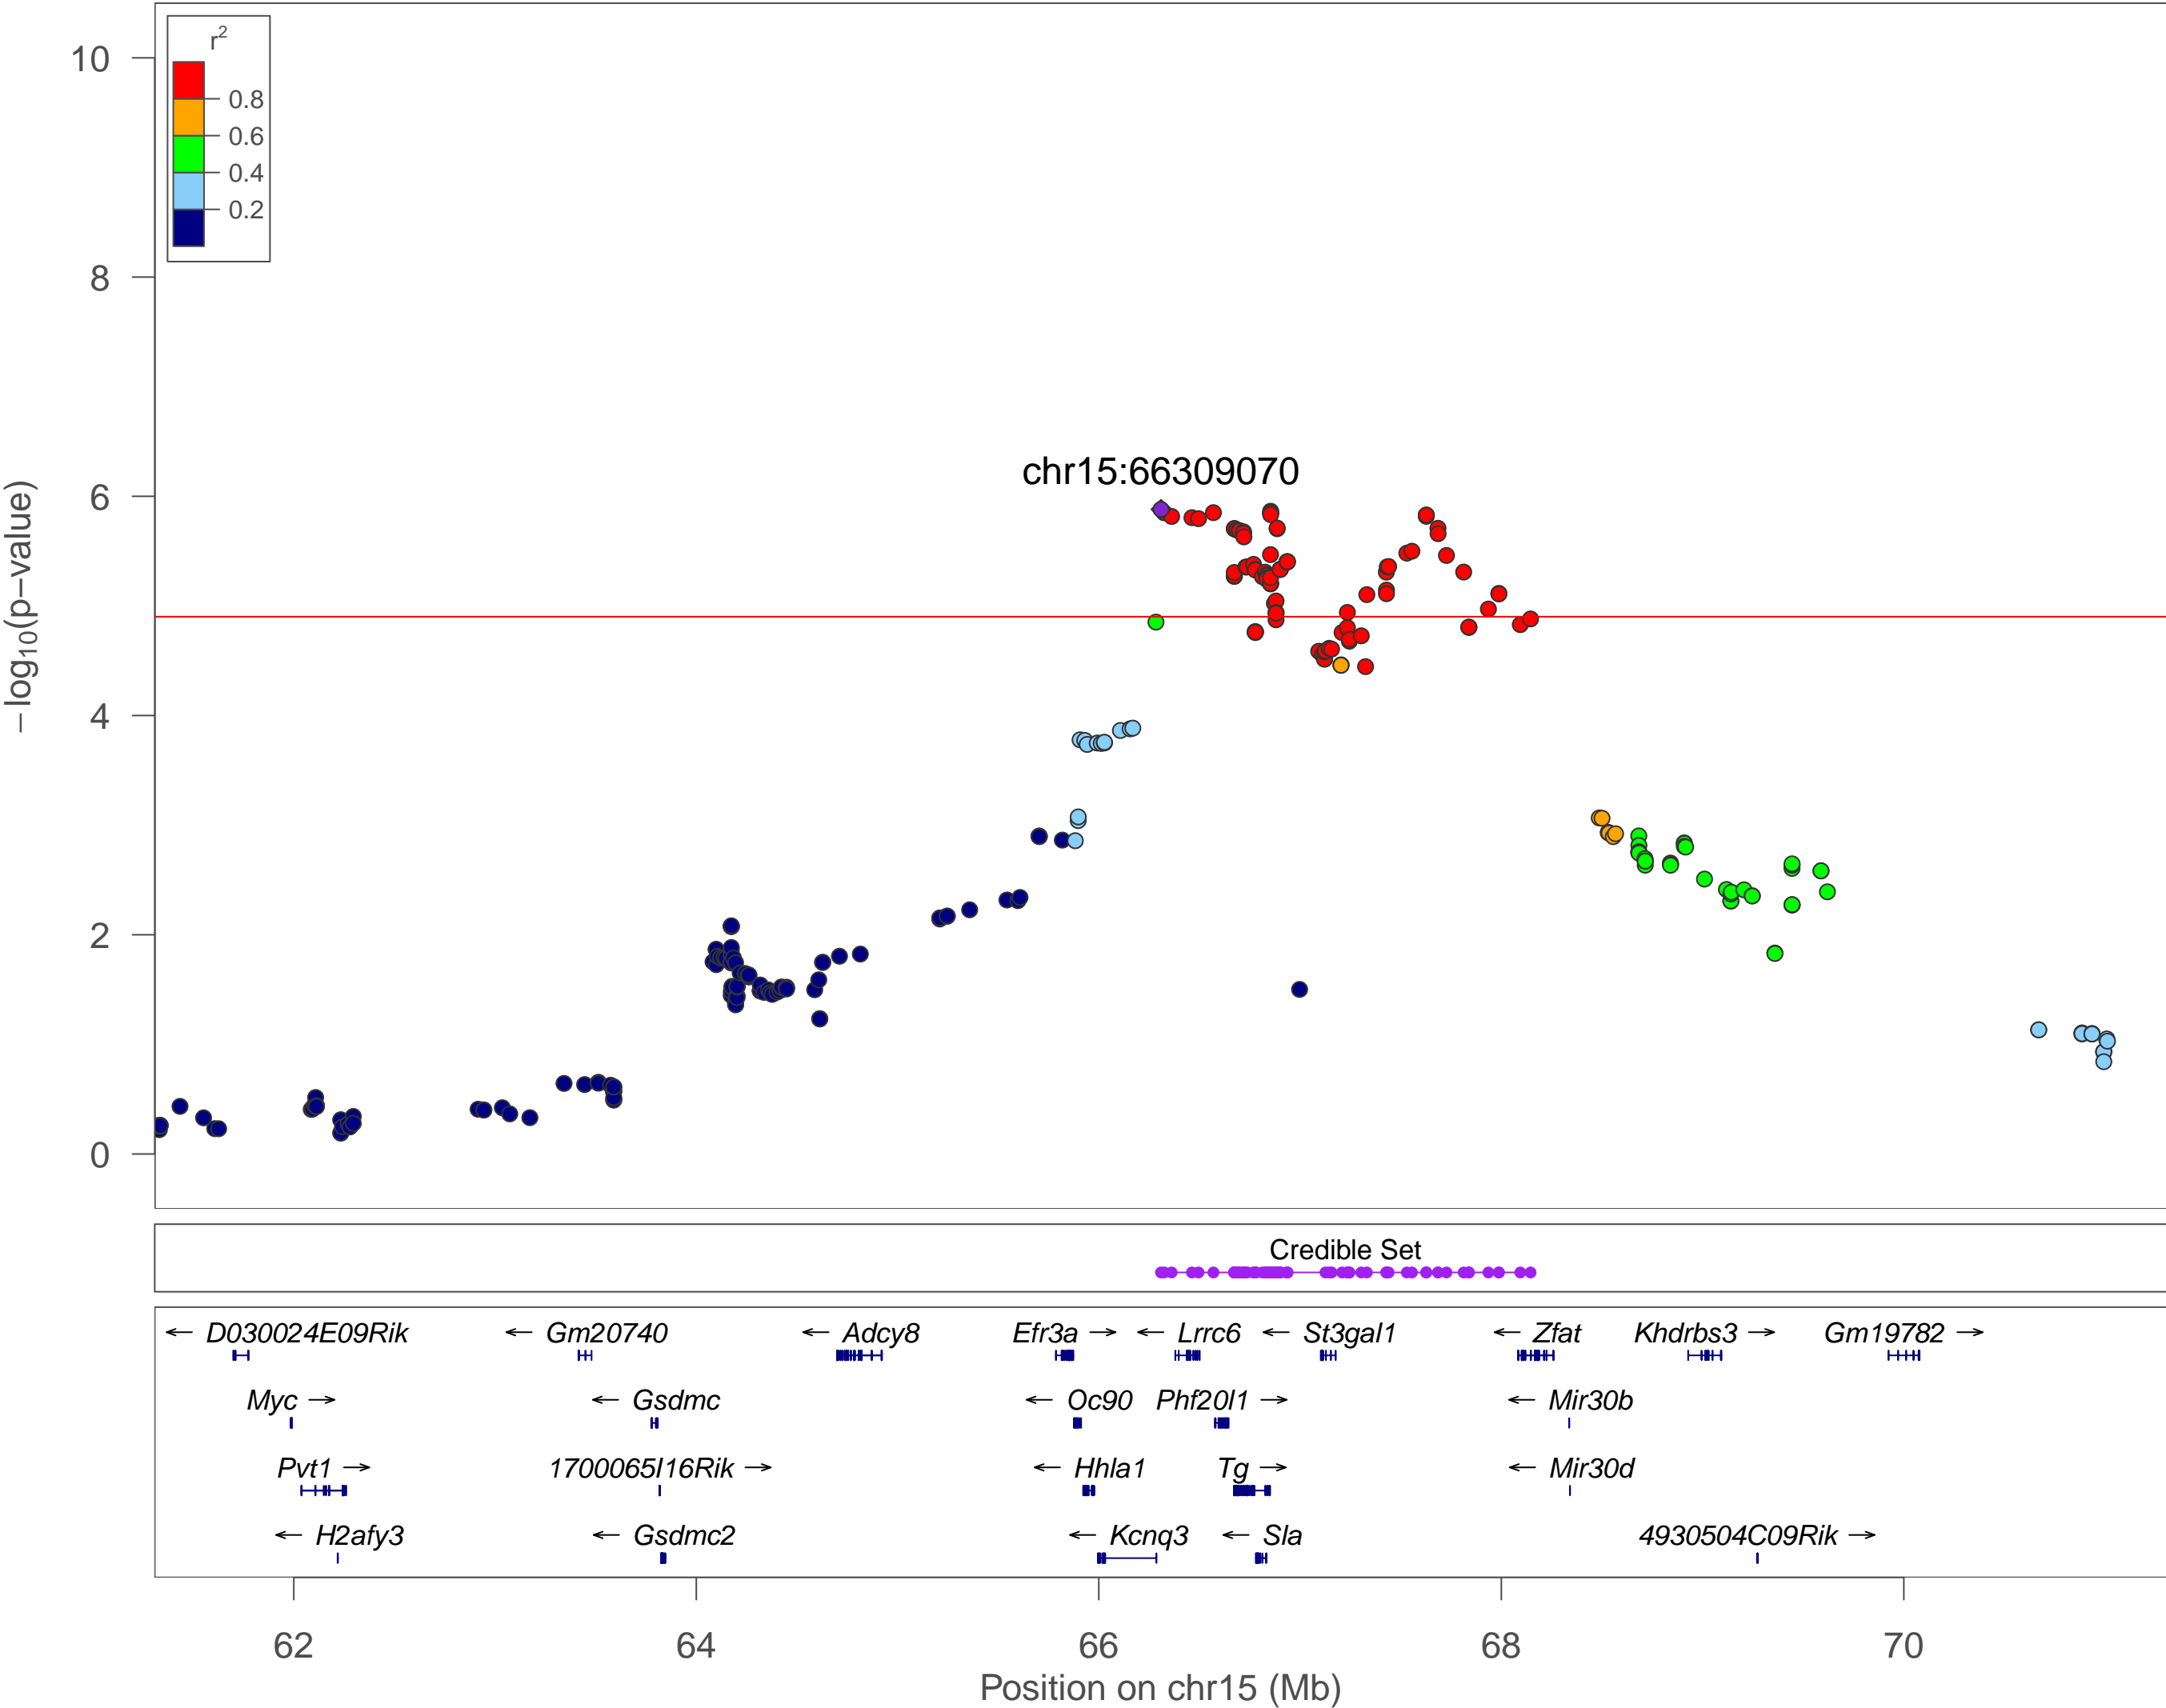

date: Thu Oct 25 17:23:28 2018

build: F3943GBS

display range: chr15:61309070–71309070 [61309070–71309070]

hilite range: 0 – 0 [ 0 – 0 ]

reference SNP: chr15:66309070

number of SNPs plotted: 317

min P-value: 1.31E–6 [chr15:66309070]

max P-value: 6.44E–1 [chr15:62233468]

omitted Genes: Gsdmcl1, Gsdmc3, Gsdmcl2

omitted Genes: Gsdmc4, Gsdmcl-ps, Fam49b

omitted Genes: Asap1, Tmem71, Wisp1

omitted Genes: Ndr1, 1700012I11Rik

## Fine-mapping Regions

| snp            | chr | pos (Mb) | pp          | group        | color  |
|----------------|-----|----------|-------------|--------------|--------|
| chr15:66309070 | 15  | 66.30907 | 0.027602429 | Credible Set | purple |
| chr15:66324506 | 15  | 66.32451 | 0.025784362 | Credible Set | purple |
| chr15:66361813 | 15  | 66.36181 | 0.023925074 | Credible Set | purple |
| chr15:66462727 | 15  | 66.46273 | 0.023337518 | Credible Set | purple |
| chr15:66495529 | 15  | 66.49553 | 0.022875143 | Credible Set | purple |
| chr15:66569471 | 15  | 66.56947 | 0.025827651 | Credible Set | purple |
| chr15:66672984 | 15  | 66.67298 | 0.007175589 | Credible Set | purple |
| chr15:66672997 | 15  | 66.67300 | 0.007144867 | Credible Set | purple |
| chr15:66673010 | 15  | 66.67301 | 0.007238337 | Credible Set | purple |
| chr15:66673015 | 15  | 66.67302 | 0.007736400 | Credible Set | purple |
| chr15:66673436 | 15  | 66.67344 | 0.018768276 | Credible Set | purple |
| chr15:66673541 | 15  | 66.67354 | 0.018660582 | Credible Set | purple |
| chr15:66673940 | 15  | 66.67394 | 0.018616154 | Credible Set | purple |
| chr15:66685097 | 15  | 66.68510 | 0.018201349 | Credible Set | purple |
| chr15:66696518 | 15  | 66.69652 | 0.018000747 | Credible Set | purple |
| chr15:66699723 | 15  | 66.69972 | 0.017931702 | Credible Set | purple |
| chr15:66719126 | 15  | 66.71913 | 0.017530102 | Credible Set | purple |
| chr15:66719241 | 15  | 66.71924 | 0.017048919 | Credible Set | purple |
| chr15:66720772 | 15  | 66.72077 | 0.015837501 | Credible Set | purple |
| chr15:66730424 | 15  | 66.73042 | 0.008618150 | Credible Set | purple |
| chr15:66737376 | 15  | 66.73738 | 0.008641068 | Credible Set | purple |
| chr15:66768701 | 15  | 66.76870 | 0.009102203 | Credible Set | purple |
| chr15:66777400 | 15  | 66.77740 | 0.008198637 | Credible Set | purple |
| chr15:66777425 | 15  | 66.77742 | 0.008199840 | Credible Set | purple |
| chr15:66777461 | 15  | 66.77746 | 0.008138798 | Credible Set | purple |
| chr15:66777706 | 15  | 66.77771 | 0.002350850 | Credible Set | purple |
| chr15:66777728 | 15  | 66.77773 | 0.002315625 | Credible Set | purple |
| chr15:66777729 | 15  | 66.77773 | 0.002344350 | Credible Set | purple |
| chr15:66777730 | 15  | 66.77773 | 0.002356767 | Credible Set | purple |
| chr15:66777731 | 15  | 66.77773 | 0.002334958 | Credible Set | purple |
| chr15:66777743 | 15  | 66.77774 | 0.002333687 | Credible Set | purple |
| chr15:66812941 | 15  | 66.81294 | 0.007096851 | Credible Set | purple |
| chr15:66826934 | 15  | 66.82693 | 0.007768279 | Credible Set | purple |
| chr15:66834506 | 15  | 66.83451 | 0.007041661 | Credible Set | purple |
| chr15:66834532 | 15  | 66.83453 | 0.007221292 | Credible Set | purple |
| chr15:66834574 | 15  | 66.83457 | 0.007203856 | Credible Set | purple |

## Fine-mapping Regions

| snp            | chr | pos (Mb) | pp          | group        | color  |
|----------------|-----|----------|-------------|--------------|--------|
| chr15:66834575 | 15  | 66.83458 | 0.007380243 | Credible Set | purple |
| chr15:66834600 | 15  | 66.83460 | 0.006909807 | Credible Set | purple |
| chr15:66834621 | 15  | 66.83462 | 0.007256518 | Credible Set | purple |
| chr15:66834624 | 15  | 66.83462 | 0.006944240 | Credible Set | purple |
| chr15:66834637 | 15  | 66.83464 | 0.006724454 | Credible Set | purple |
| chr15:66853166 | 15  | 66.85317 | 0.011076730 | Credible Set | purple |
| chr15:66853439 | 15  | 66.85344 | 0.006141571 | Credible Set | purple |
| chr15:66853460 | 15  | 66.85346 | 0.006206811 | Credible Set | purple |
| chr15:66853489 | 15  | 66.85349 | 0.006216656 | Credible Set | purple |
| chr15:66853520 | 15  | 66.85352 | 0.006954034 | Credible Set | purple |
| chr15:66853893 | 15  | 66.85389 | 0.026569445 | Credible Set | purple |
| chr15:66853894 | 15  | 66.85389 | 0.025751834 | Credible Set | purple |
| chr15:66853923 | 15  | 66.85392 | 0.025749399 | Credible Set | purple |
| chr15:66853954 | 15  | 66.85395 | 0.024823326 | Credible Set | purple |
| chr15:66872519 | 15  | 66.87252 | 0.004148601 | Credible Set | purple |
| chr15:66880575 | 15  | 66.88057 | 0.002987713 | Credible Set | purple |
| chr15:66880583 | 15  | 66.88058 | 0.004361522 | Credible Set | purple |
| chr15:66880635 | 15  | 66.88063 | 0.003460220 | Credible Set | purple |
| chr15:66880638 | 15  | 66.88064 | 0.003412050 | Credible Set | purple |
| chr15:66886219 | 15  | 66.88622 | 0.018666227 | Credible Set | purple |
| chr15:66886266 | 15  | 66.88627 | 0.018934431 | Credible Set | purple |
| chr15:66901528 | 15  | 66.90153 | 0.008224937 | Credible Set | purple |
| chr15:66901548 | 15  | 66.90155 | 0.008224937 | Credible Set | purple |
| chr15:66901593 | 15  | 66.90159 | 0.008224937 | Credible Set | purple |
| chr15:66935376 | 15  | 66.93538 | 0.009558409 | Credible Set | purple |
| chr15:66935390 | 15  | 66.93539 | 0.009558409 | Credible Set | purple |
| chr15:66935391 | 15  | 66.93539 | 0.009558409 | Credible Set | purple |
| chr15:66935405 | 15  | 66.93541 | 0.009558409 | Credible Set | purple |
| chr15:66937231 | 15  | 66.93723 | 0.009632455 | Credible Set | purple |
| chr15:66937423 | 15  | 66.93742 | 0.009580685 | Credible Set | purple |
| chr15:67126159 | 15  | 67.12616 | 0.001608394 | Credible Set | purple |
| chr15:67144054 | 15  | 67.14405 | 0.001689761 | Credible Set | purple |
| chr15:67156480 | 15  | 67.15648 | 0.001663602 | Credible Set | purple |
| chr15:67208761 | 15  | 67.20876 | 0.002315708 | Credible Set | purple |
| chr15:67234910 | 15  | 67.23491 | 0.002553108 | Credible Set | purple |
| chr15:67235072 | 15  | 67.23507 | 0.003465870 | Credible Set | purple |



## Fine-mapping Regions

| snp            | chr | pos (Mb) | pp          | group        | color  |
|----------------|-----|----------|-------------|--------------|--------|
| chr15:67245093 | 15  | 67.24509 | 0.001948659 | Credible Set | purple |
| chr15:67245123 | 15  | 67.24512 | 0.002023520 | Credible Set | purple |
| chr15:67304194 | 15  | 67.30419 | 0.002169408 | Credible Set | purple |
| chr15:67331738 | 15  | 67.33174 | 0.004954677 | Credible Set | purple |
| chr15:67428857 | 15  | 67.42886 | 0.007784087 | Credible Set | purple |
| chr15:67429407 | 15  | 67.42941 | 0.005426222 | Credible Set | purple |
| chr15:67429420 | 15  | 67.42942 | 0.005044111 | Credible Set | purple |
| chr15:67433395 | 15  | 67.43340 | 0.008657028 | Credible Set | purple |
| chr15:67439974 | 15  | 67.43997 | 0.008716280 | Credible Set | purple |
| chr15:67530570 | 15  | 67.53057 | 0.011413170 | Credible Set | purple |
| chr15:67555683 | 15  | 67.55568 | 0.011864812 | Credible Set | purple |
| chr15:67627161 | 15  | 67.62716 | 0.023978263 | Credible Set | purple |
| chr15:67627183 | 15  | 67.62718 | 0.024568459 | Credible Set | purple |
| chr15:67627194 | 15  | 67.62719 | 0.024589519 | Credible Set | purple |
| chr15:67685224 | 15  | 67.68522 | 0.018843202 | Credible Set | purple |
| chr15:67685781 | 15  | 67.68578 | 0.016888870 | Credible Set | purple |
| chr15:67727448 | 15  | 67.72745 | 0.010895379 | Credible Set | purple |
| chr15:67812971 | 15  | 67.81297 | 0.007799587 | Credible Set | purple |
| chr15:67838708 | 15  | 67.83871 | 0.002574356 | Credible Set | purple |
| chr15:67838720 | 15  | 67.83872 | 0.002572597 | Credible Set | purple |
| chr15:67838721 | 15  | 67.83872 | 0.002581671 | Credible Set | purple |
| chr15:67935812 | 15  | 67.93581 | 0.003710205 | Credible Set | purple |
| chr15:67987913 | 15  | 67.98791 | 0.005080623 | Credible Set | purple |
| chr15:67987932 | 15  | 67.98793 | 0.005020532 | Credible Set | purple |
| chr15:68094377 | 15  | 68.09438 | 0.002712696 | Credible Set | purple |
| chr15:68145325 | 15  | 68.14532 | 0.003041452 | Credible Set | purple |

F39–43 GBS, open field, zone transition frequency in 10 minutes

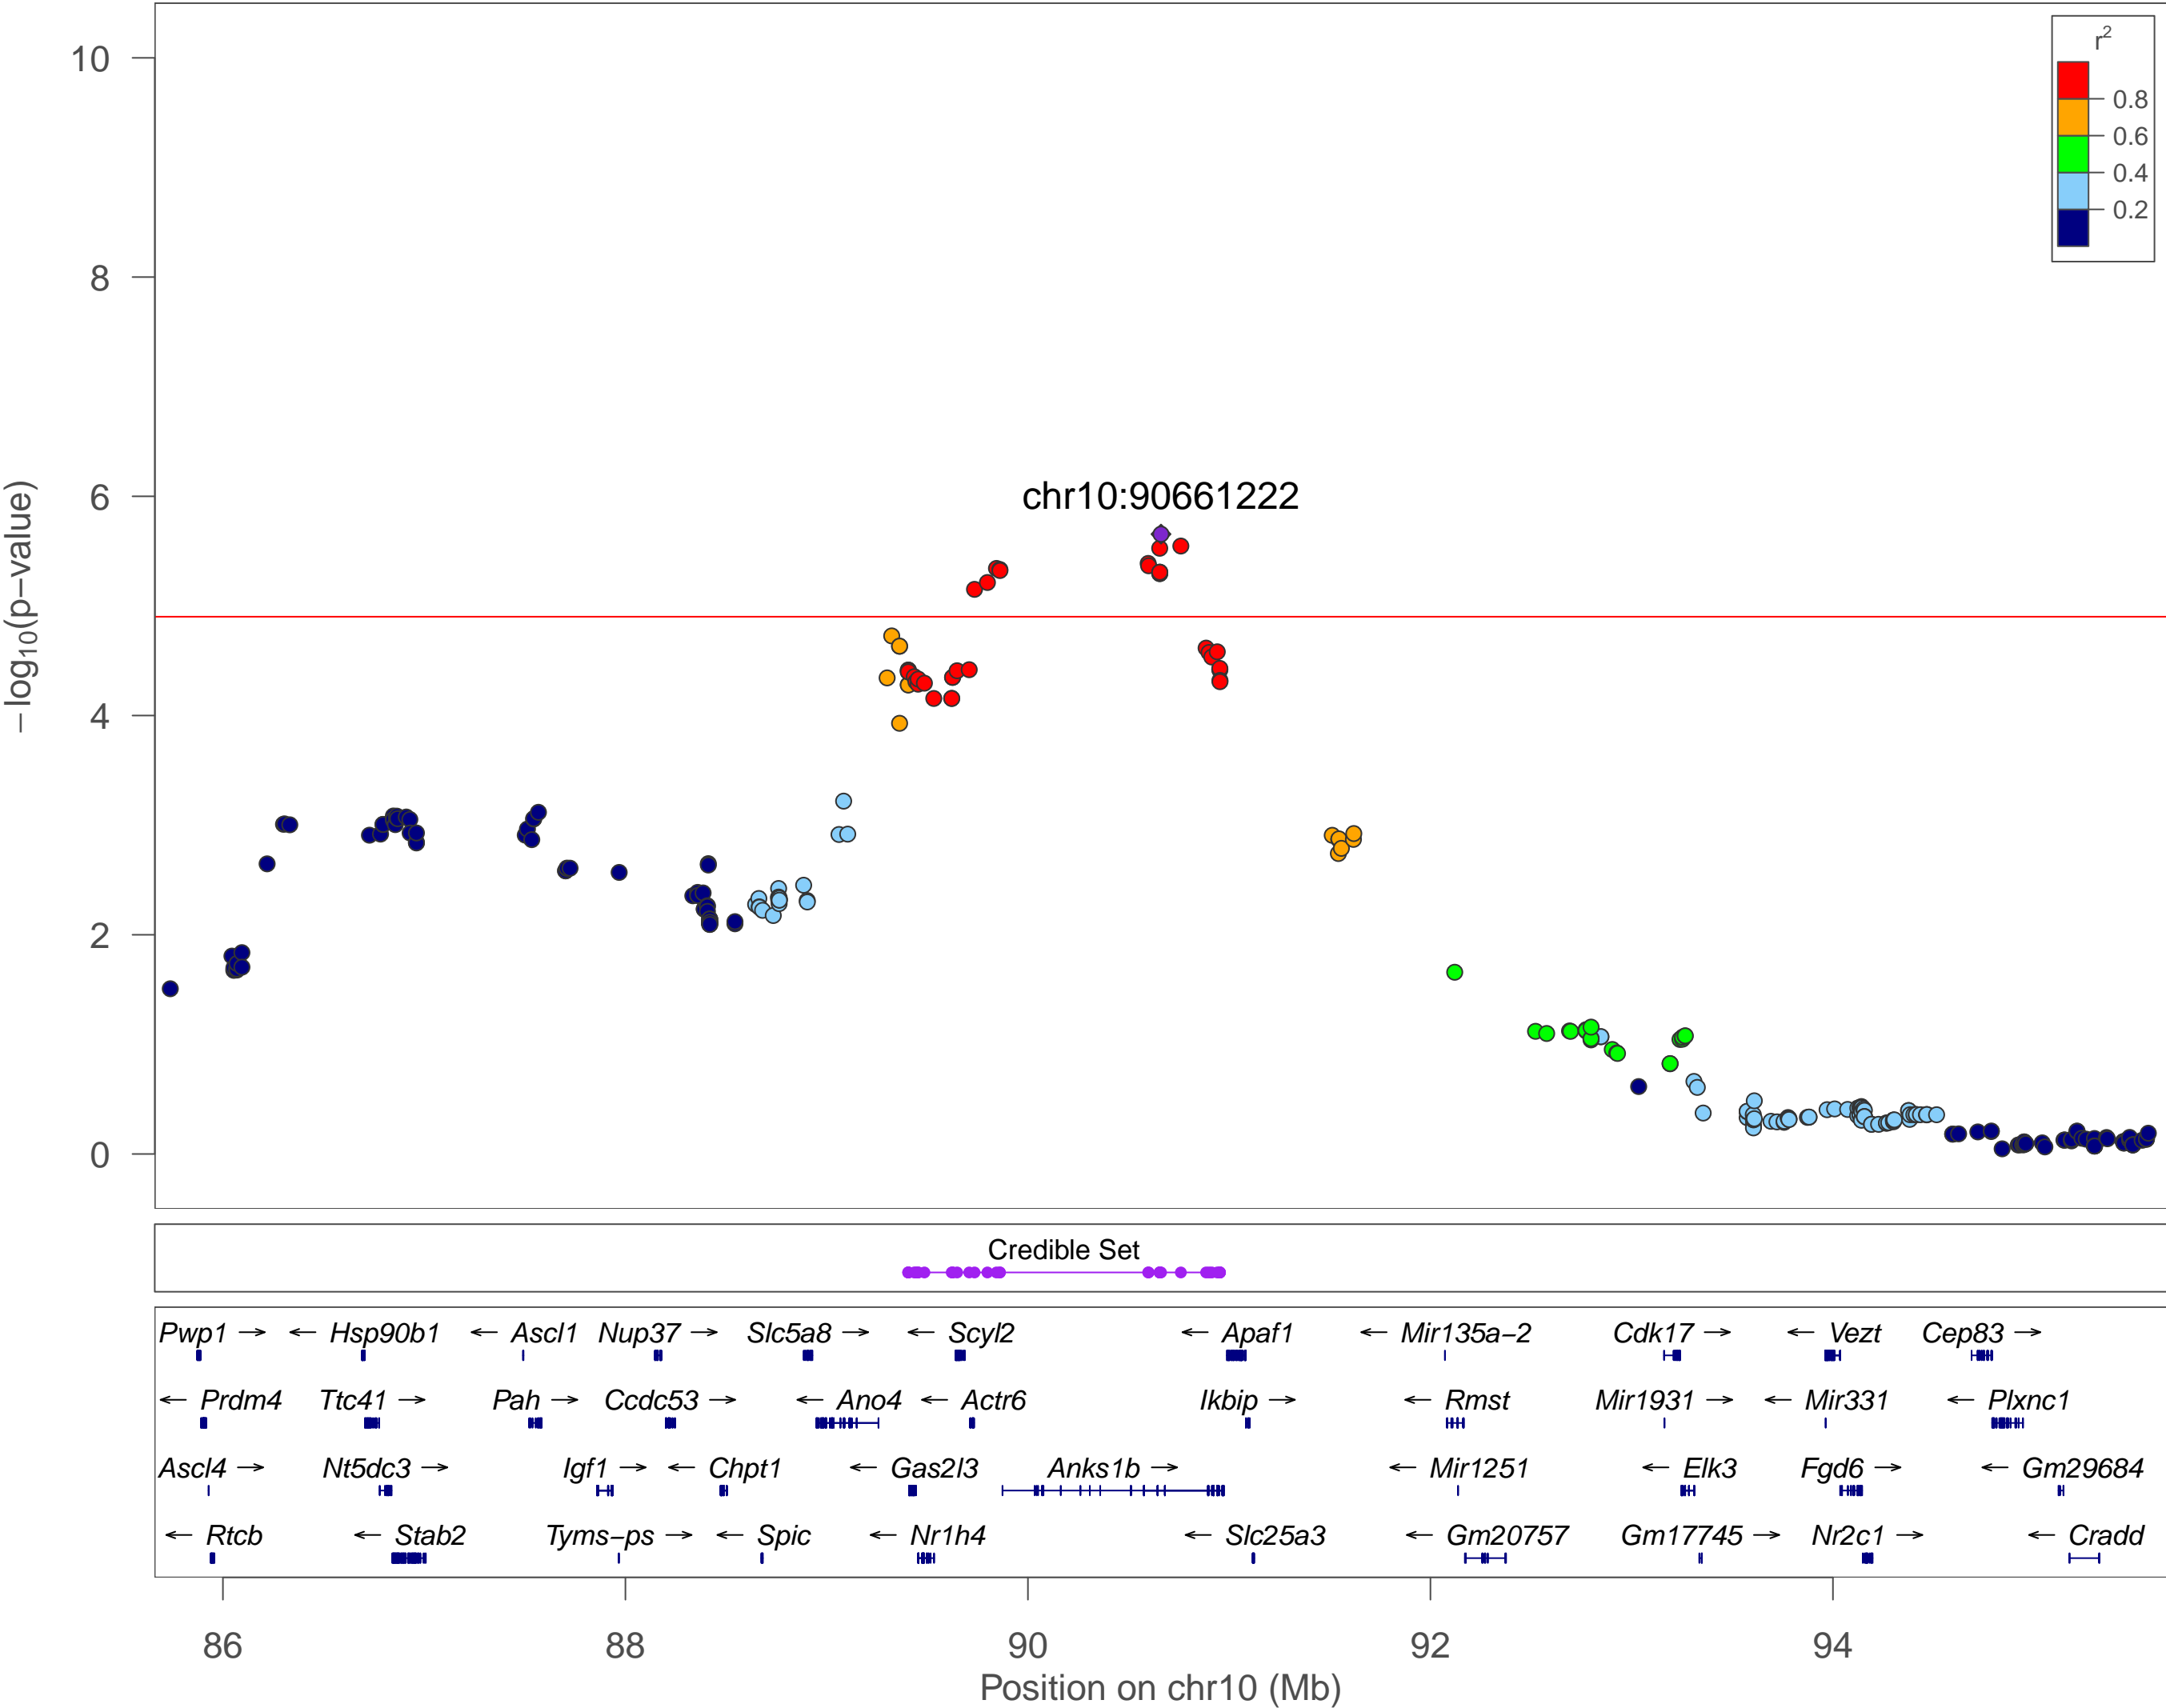

date: Thu Oct 25 17:23:37 2018  
build: F3943GBS  
display range: chr10:85661222–95661222 [85661222–95661222]  
hilite range: 0 – 0 [ 0 – 0 ]  
reference SNP: chr10:90661222  
number of SNPs plotted: 288  
min P-value: 2.21E–6 [chr10:90661222]  
max P-value: 8.96E–1 [chr10:94840769]  
omitted Genes: Bpifc, Fbxo7, Syn3  
omitted Genes: 4930486F22Rik, Timp3, 1810014B01Rik  
omitted Genes: 1700113H08Rik, Pmch, Parpbp  
omitted Genes: Dram1, Gnptab, Sycp3  
omitted Genes: Mybpc1, Gm4925, Arl1  
omitted Genes: Utp20, Slc17a8, 1500026H17Rik  
omitted Genes: Uhrf1bp1l, Tmpo, Nedd1  
omitted Genes: Mir7688, Lta4h, Hal  
omitted Genes: Amdhd1, Ccdc38, Snrpf  
omitted Genes: 4933408J17Rik, Ntn4, Gm8580  
omitted Genes: Gm15915, Usp44, Metap2  
omitted Genes: Ndufa12, Gm4792, Tmcc3  
omitted Genes: Mir7211, Cep83os, 2310039L15Rik  
omitted Genes: Socs2, 5730420D15Rik, Mrpl42  
omitted Genes: Ube2n, Nudt4, Mir3058

## Fine-mapping Regions

| snp            | chr | pos (Mb) | pp          | group        | color  |
|----------------|-----|----------|-------------|--------------|--------|
| chr10:89405556 | 10  | 89.40556 | 0.007110253 | Credible Set | purple |
| chr10:89405564 | 10  | 89.40556 | 0.007110253 | Credible Set | purple |
| chr10:89405589 | 10  | 89.40559 | 0.006873806 | Credible Set | purple |
| chr10:89405627 | 10  | 89.40563 | 0.006872709 | Credible Set | purple |
| chr10:89435280 | 10  | 89.43528 | 0.006237086 | Credible Set | purple |
| chr10:89443390 | 10  | 89.44339 | 0.005643714 | Credible Set | purple |
| chr10:89454154 | 10  | 89.45415 | 0.005374599 | Credible Set | purple |
| chr10:89454848 | 10  | 89.45485 | 0.005948185 | Credible Set | purple |
| chr10:89485534 | 10  | 89.48553 | 0.005483304 | Credible Set | purple |
| chr10:89621284 | 10  | 89.62128 | 0.004055150 | Credible Set | purple |
| chr10:89625488 | 10  | 89.62549 | 0.006149478 | Credible Set | purple |
| chr10:89625559 | 10  | 89.62556 | 0.006163075 | Credible Set | purple |
| chr10:89647994 | 10  | 89.64799 | 0.007025377 | Credible Set | purple |
| chr10:89708192 | 10  | 89.70819 | 0.007167567 | Credible Set | purple |
| chr10:89734590 | 10  | 89.73459 | 0.035816412 | Credible Set | purple |
| chr10:89798643 | 10  | 89.79864 | 0.041113810 | Credible Set | purple |
| chr10:89843657 | 10  | 89.84366 | 0.054575227 | Credible Set | purple |
| chr10:89860498 | 10  | 89.86050 | 0.053350253 | Credible Set | purple |
| chr10:89860846 | 10  | 89.86085 | 0.052304898 | Credible Set | purple |
| chr10:90597510 | 10  | 90.59751 | 0.060343620 | Credible Set | purple |
| chr10:90599690 | 10  | 90.59969 | 0.057550014 | Credible Set | purple |
| chr10:90654718 | 10  | 90.65472 | 0.081877350 | Credible Set | purple |
| chr10:90654994 | 10  | 90.65499 | 0.049181449 | Credible Set | purple |
| chr10:90654998 | 10  | 90.65500 | 0.050621256 | Credible Set | purple |
| chr10:90655002 | 10  | 90.65500 | 0.049224914 | Credible Set | purple |
| chr10:90655039 | 10  | 90.65504 | 0.050537434 | Credible Set | purple |
| chr10:90661222 | 10  | 90.66122 | 0.108813289 | Credible Set | purple |
| chr10:90759813 | 10  | 90.75981 | 0.085624559 | Credible Set | purple |
| chr10:90885383 | 10  | 90.88538 | 0.011035572 | Credible Set | purple |
| chr10:90899946 | 10  | 90.89995 | 0.010107830 | Credible Set | purple |
| chr10:90913583 | 10  | 90.91358 | 0.009231826 | Credible Set | purple |
| chr10:90940720 | 10  | 90.94072 | 0.010245749 | Credible Set | purple |
| chr10:90953385 | 10  | 90.95338 | 0.007127699 | Credible Set | purple |
| chr10:90953402 | 10  | 90.95340 | 0.007216611 | Credible Set | purple |
| chr10:90953425 | 10  | 90.95342 | 0.007360237 | Credible Set | purple |
| chr10:90954053 | 10  | 90.95405 | 0.005791753 | Credible Set | purple |

Fine-mapping Regions

| snp            | chr | pos (Mb) | pp          | group        | color  |
|----------------|-----|----------|-------------|--------------|--------|
| chr10:90954116 | 10  | 90.95412 | 0.005647662 | Credible Set | purple |

# F39–43 GBS, open field, zone transition frequency in 10 minutes

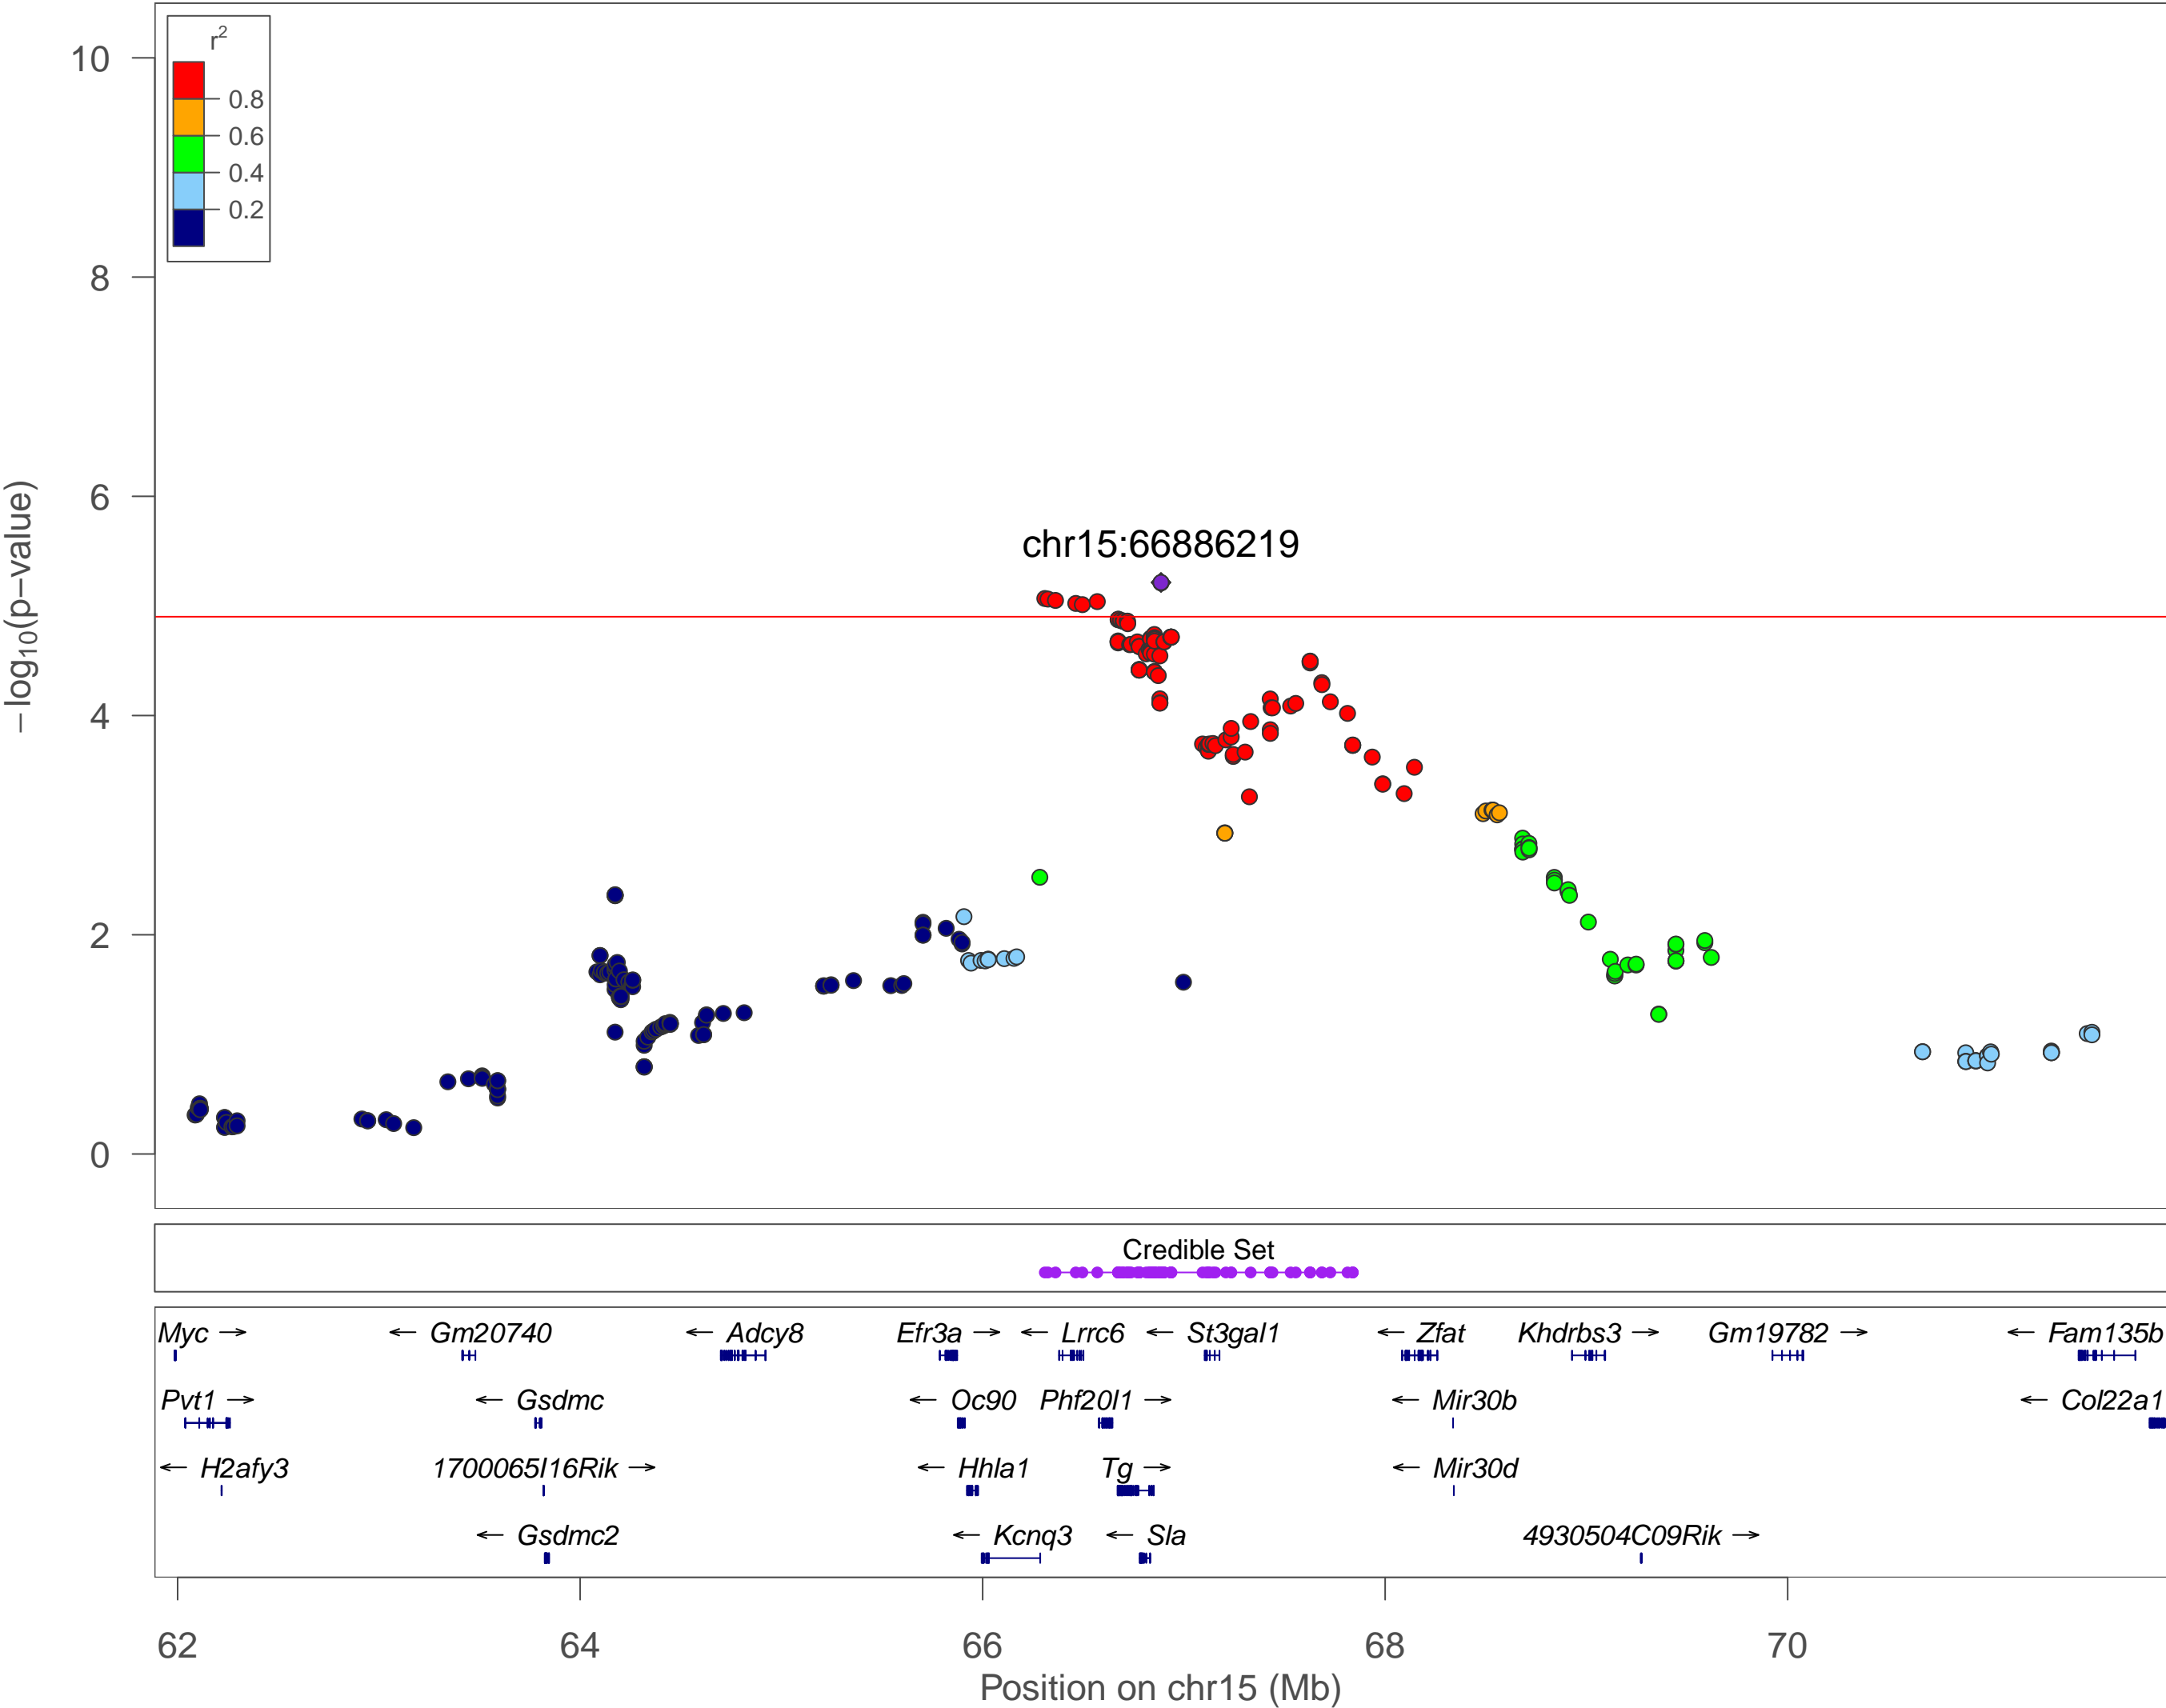

date: Thu Oct 25 17:23:45 2018

build: F3943GBS

display range: chr15:61886219–71886219 [61886219–71886219]

hilite range: 0 – 0 [ 0 – 0 ]

reference SNP: chr15:66886219

number of SNPs plotted: 313

min P-value: 6.11E–6 [chr15:66886219]

max P-value: 5.75E–1 [chr15:63173066]

omitted Genes: Gsdmcl1, Gsdmc3, Gsdmcl2

omitted Genes: Gsdmc4, Gsdmcl-ps, Fam49b

omitted Genes: Asap1, Tmem71, Wisp1

omitted Genes: Ndr1, 1700012I11Rik

## Fine-mapping Regions

| snp            | chr | pos (Mb) | pp          | group        | color  |
|----------------|-----|----------|-------------|--------------|--------|
| chr15:66309070 | 15  | 66.30907 | 0.028511659 | Credible Set | purple |
| chr15:66324506 | 15  | 66.32451 | 0.028181511 | Credible Set | purple |
| chr15:66361813 | 15  | 66.36181 | 0.027429878 | Credible Set | purple |
| chr15:66462727 | 15  | 66.46273 | 0.025826000 | Credible Set | purple |
| chr15:66495529 | 15  | 66.49553 | 0.025206244 | Credible Set | purple |
| chr15:66569471 | 15  | 66.56947 | 0.026786024 | Credible Set | purple |
| chr15:66672984 | 15  | 66.67298 | 0.012177363 | Credible Set | purple |
| chr15:66672997 | 15  | 66.67300 | 0.012049709 | Credible Set | purple |
| chr15:66673010 | 15  | 66.67301 | 0.011713852 | Credible Set | purple |
| chr15:66673015 | 15  | 66.67302 | 0.011966795 | Credible Set | purple |
| chr15:66673436 | 15  | 66.67344 | 0.018585760 | Credible Set | purple |
| chr15:66673541 | 15  | 66.67354 | 0.018767046 | Credible Set | purple |
| chr15:66673940 | 15  | 66.67394 | 0.018823625 | Credible Set | purple |
| chr15:66685097 | 15  | 66.68510 | 0.018420545 | Credible Set | purple |
| chr15:66696518 | 15  | 66.69652 | 0.018046317 | Credible Set | purple |
| chr15:66699723 | 15  | 66.69972 | 0.018160473 | Credible Set | purple |
| chr15:66719126 | 15  | 66.71913 | 0.018119210 | Credible Set | purple |
| chr15:66719241 | 15  | 66.71924 | 0.018033946 | Credible Set | purple |
| chr15:66720772 | 15  | 66.72077 | 0.017196761 | Credible Set | purple |
| chr15:66730424 | 15  | 66.73042 | 0.011300042 | Credible Set | purple |
| chr15:66737376 | 15  | 66.73738 | 0.011358314 | Credible Set | purple |
| chr15:66768701 | 15  | 66.76870 | 0.011949547 | Credible Set | purple |
| chr15:66777400 | 15  | 66.77740 | 0.010904753 | Credible Set | purple |
| chr15:66777425 | 15  | 66.77742 | 0.010900928 | Credible Set | purple |
| chr15:66777461 | 15  | 66.77746 | 0.010891382 | Credible Set | purple |
| chr15:66777706 | 15  | 66.77771 | 0.006879374 | Credible Set | purple |
| chr15:66777728 | 15  | 66.77773 | 0.006789628 | Credible Set | purple |
| chr15:66777729 | 15  | 66.77773 | 0.006877831 | Credible Set | purple |
| chr15:66777730 | 15  | 66.77773 | 0.006834784 | Credible Set | purple |
| chr15:66777731 | 15  | 66.77773 | 0.006834310 | Credible Set | purple |
| chr15:66777743 | 15  | 66.77774 | 0.006808240 | Credible Set | purple |
| chr15:66812941 | 15  | 66.81294 | 0.009413262 | Credible Set | purple |
| chr15:66826934 | 15  | 66.82693 | 0.010303910 | Credible Set | purple |
| chr15:66834506 | 15  | 66.83451 | 0.012647346 | Credible Set | purple |
| chr15:66834532 | 15  | 66.83453 | 0.012876972 | Credible Set | purple |
| chr15:66834574 | 15  | 66.83457 | 0.012504120 | Credible Set | purple |



## Fine-mapping Regions

| snp            | chr | pos (Mb) | pp          | group        | color  |
|----------------|-----|----------|-------------|--------------|--------|
| chr15:66834575 | 15  | 66.83458 | 0.012686151 | Credible Set | purple |
| chr15:66834600 | 15  | 66.83460 | 0.009679353 | Credible Set | purple |
| chr15:66834621 | 15  | 66.83462 | 0.010209681 | Credible Set | purple |
| chr15:66834624 | 15  | 66.83462 | 0.009817655 | Credible Set | purple |
| chr15:66834637 | 15  | 66.83464 | 0.009537756 | Credible Set | purple |
| chr15:66853166 | 15  | 66.85317 | 0.013866897 | Credible Set | purple |
| chr15:66853439 | 15  | 66.85344 | 0.006552096 | Credible Set | purple |
| chr15:66853460 | 15  | 66.85346 | 0.006624216 | Credible Set | purple |
| chr15:66853489 | 15  | 66.85349 | 0.006548992 | Credible Set | purple |
| chr15:66853520 | 15  | 66.85352 | 0.009333603 | Credible Set | purple |
| chr15:66853893 | 15  | 66.85389 | 0.012991772 | Credible Set | purple |
| chr15:66853894 | 15  | 66.85389 | 0.012766362 | Credible Set | purple |
| chr15:66853923 | 15  | 66.85392 | 0.012583236 | Credible Set | purple |
| chr15:66853954 | 15  | 66.85395 | 0.012142949 | Credible Set | purple |
| chr15:66872519 | 15  | 66.87252 | 0.006095154 | Credible Set | purple |
| chr15:66880575 | 15  | 66.88057 | 0.003844528 | Credible Set | purple |
| chr15:66880583 | 15  | 66.88058 | 0.009036405 | Credible Set | purple |
| chr15:66880635 | 15  | 66.88063 | 0.003543907 | Credible Set | purple |
| chr15:66880638 | 15  | 66.88064 | 0.003523287 | Credible Set | purple |
| chr15:66886219 | 15  | 66.88622 | 0.039337654 | Credible Set | purple |
| chr15:66886266 | 15  | 66.88627 | 0.038961971 | Credible Set | purple |
| chr15:66901528 | 15  | 66.90153 | 0.011970614 | Credible Set | purple |
| chr15:66901548 | 15  | 66.90155 | 0.011970614 | Credible Set | purple |
| chr15:66901593 | 15  | 66.90159 | 0.011970614 | Credible Set | purple |
| chr15:66935376 | 15  | 66.93538 | 0.013148876 | Credible Set | purple |
| chr15:66935390 | 15  | 66.93539 | 0.013148876 | Credible Set | purple |
| chr15:66935391 | 15  | 66.93539 | 0.013148876 | Credible Set | purple |
| chr15:66935405 | 15  | 66.93541 | 0.013148876 | Credible Set | purple |
| chr15:66937231 | 15  | 66.93723 | 0.013166389 | Credible Set | purple |
| chr15:66937423 | 15  | 66.93742 | 0.013168301 | Credible Set | purple |
| chr15:67092666 | 15  | 67.09267 | 0.001569620 | Credible Set | purple |
| chr15:67111279 | 15  | 67.11128 | 0.001467006 | Credible Set | purple |
| chr15:67121570 | 15  | 67.12157 | 0.001373203 | Credible Set | purple |
| chr15:67121756 | 15  | 67.12176 | 0.001554881 | Credible Set | purple |
| chr15:67126159 | 15  | 67.12616 | 0.001570026 | Credible Set | purple |
| chr15:67144054 | 15  | 67.14405 | 0.001585262 | Credible Set | purple |

Fine-mapping Regions

| snp            | chr | pos (Mb) | pp          | group        | color  |
|----------------|-----|----------|-------------|--------------|--------|
| chr15:67156480 | 15  | 67.15648 | 0.001518148 | Credible Set | purple |
| chr15:67208761 | 15  | 67.20876 | 0.001703156 | Credible Set | purple |
| chr15:67234910 | 15  | 67.23491 | 0.001802725 | Credible Set | purple |
| chr15:67235072 | 15  | 67.23507 | 0.002136883 | Credible Set | purple |
| chr15:67331738 | 15  | 67.33174 | 0.002448117 | Credible Set | purple |
| chr15:67428857 | 15  | 67.42886 | 0.003831127 | Credible Set | purple |
| chr15:67429407 | 15  | 67.42941 | 0.002081463 | Credible Set | purple |
| chr15:67429420 | 15  | 67.42942 | 0.001935854 | Credible Set | purple |
| chr15:67433395 | 15  | 67.43340 | 0.003215775 | Credible Set | purple |
| chr15:67439974 | 15  | 67.43997 | 0.003212451 | Credible Set | purple |
| chr15:67530570 | 15  | 67.53057 | 0.003328201 | Credible Set | purple |
| chr15:67555683 | 15  | 67.55568 | 0.003506209 | Credible Set | purple |
| chr15:67627161 | 15  | 67.62716 | 0.007848421 | Credible Set | purple |
| chr15:67627183 | 15  | 67.62718 | 0.008139256 | Credible Set | purple |
| chr15:67627194 | 15  | 67.62719 | 0.008099851 | Credible Set | purple |
| chr15:67685224 | 15  | 67.68522 | 0.005299297 | Credible Set | purple |
| chr15:67685781 | 15  | 67.68578 | 0.005091978 | Credible Set | purple |
| chr15:67727448 | 15  | 67.72745 | 0.003622422 | Credible Set | purple |
| chr15:67812971 | 15  | 67.81297 | 0.002877637 | Credible Set | purple |
| chr15:67838708 | 15  | 67.83871 | 0.001529699 | Credible Set | purple |
| chr15:67838720 | 15  | 67.83872 | 0.001527159 | Credible Set | purple |
| chr15:67838721 | 15  | 67.83872 | 0.001538616 | Credible Set | purple |

F39–43 GBS, open field, minimum distance to center in 10 minutes (cm)

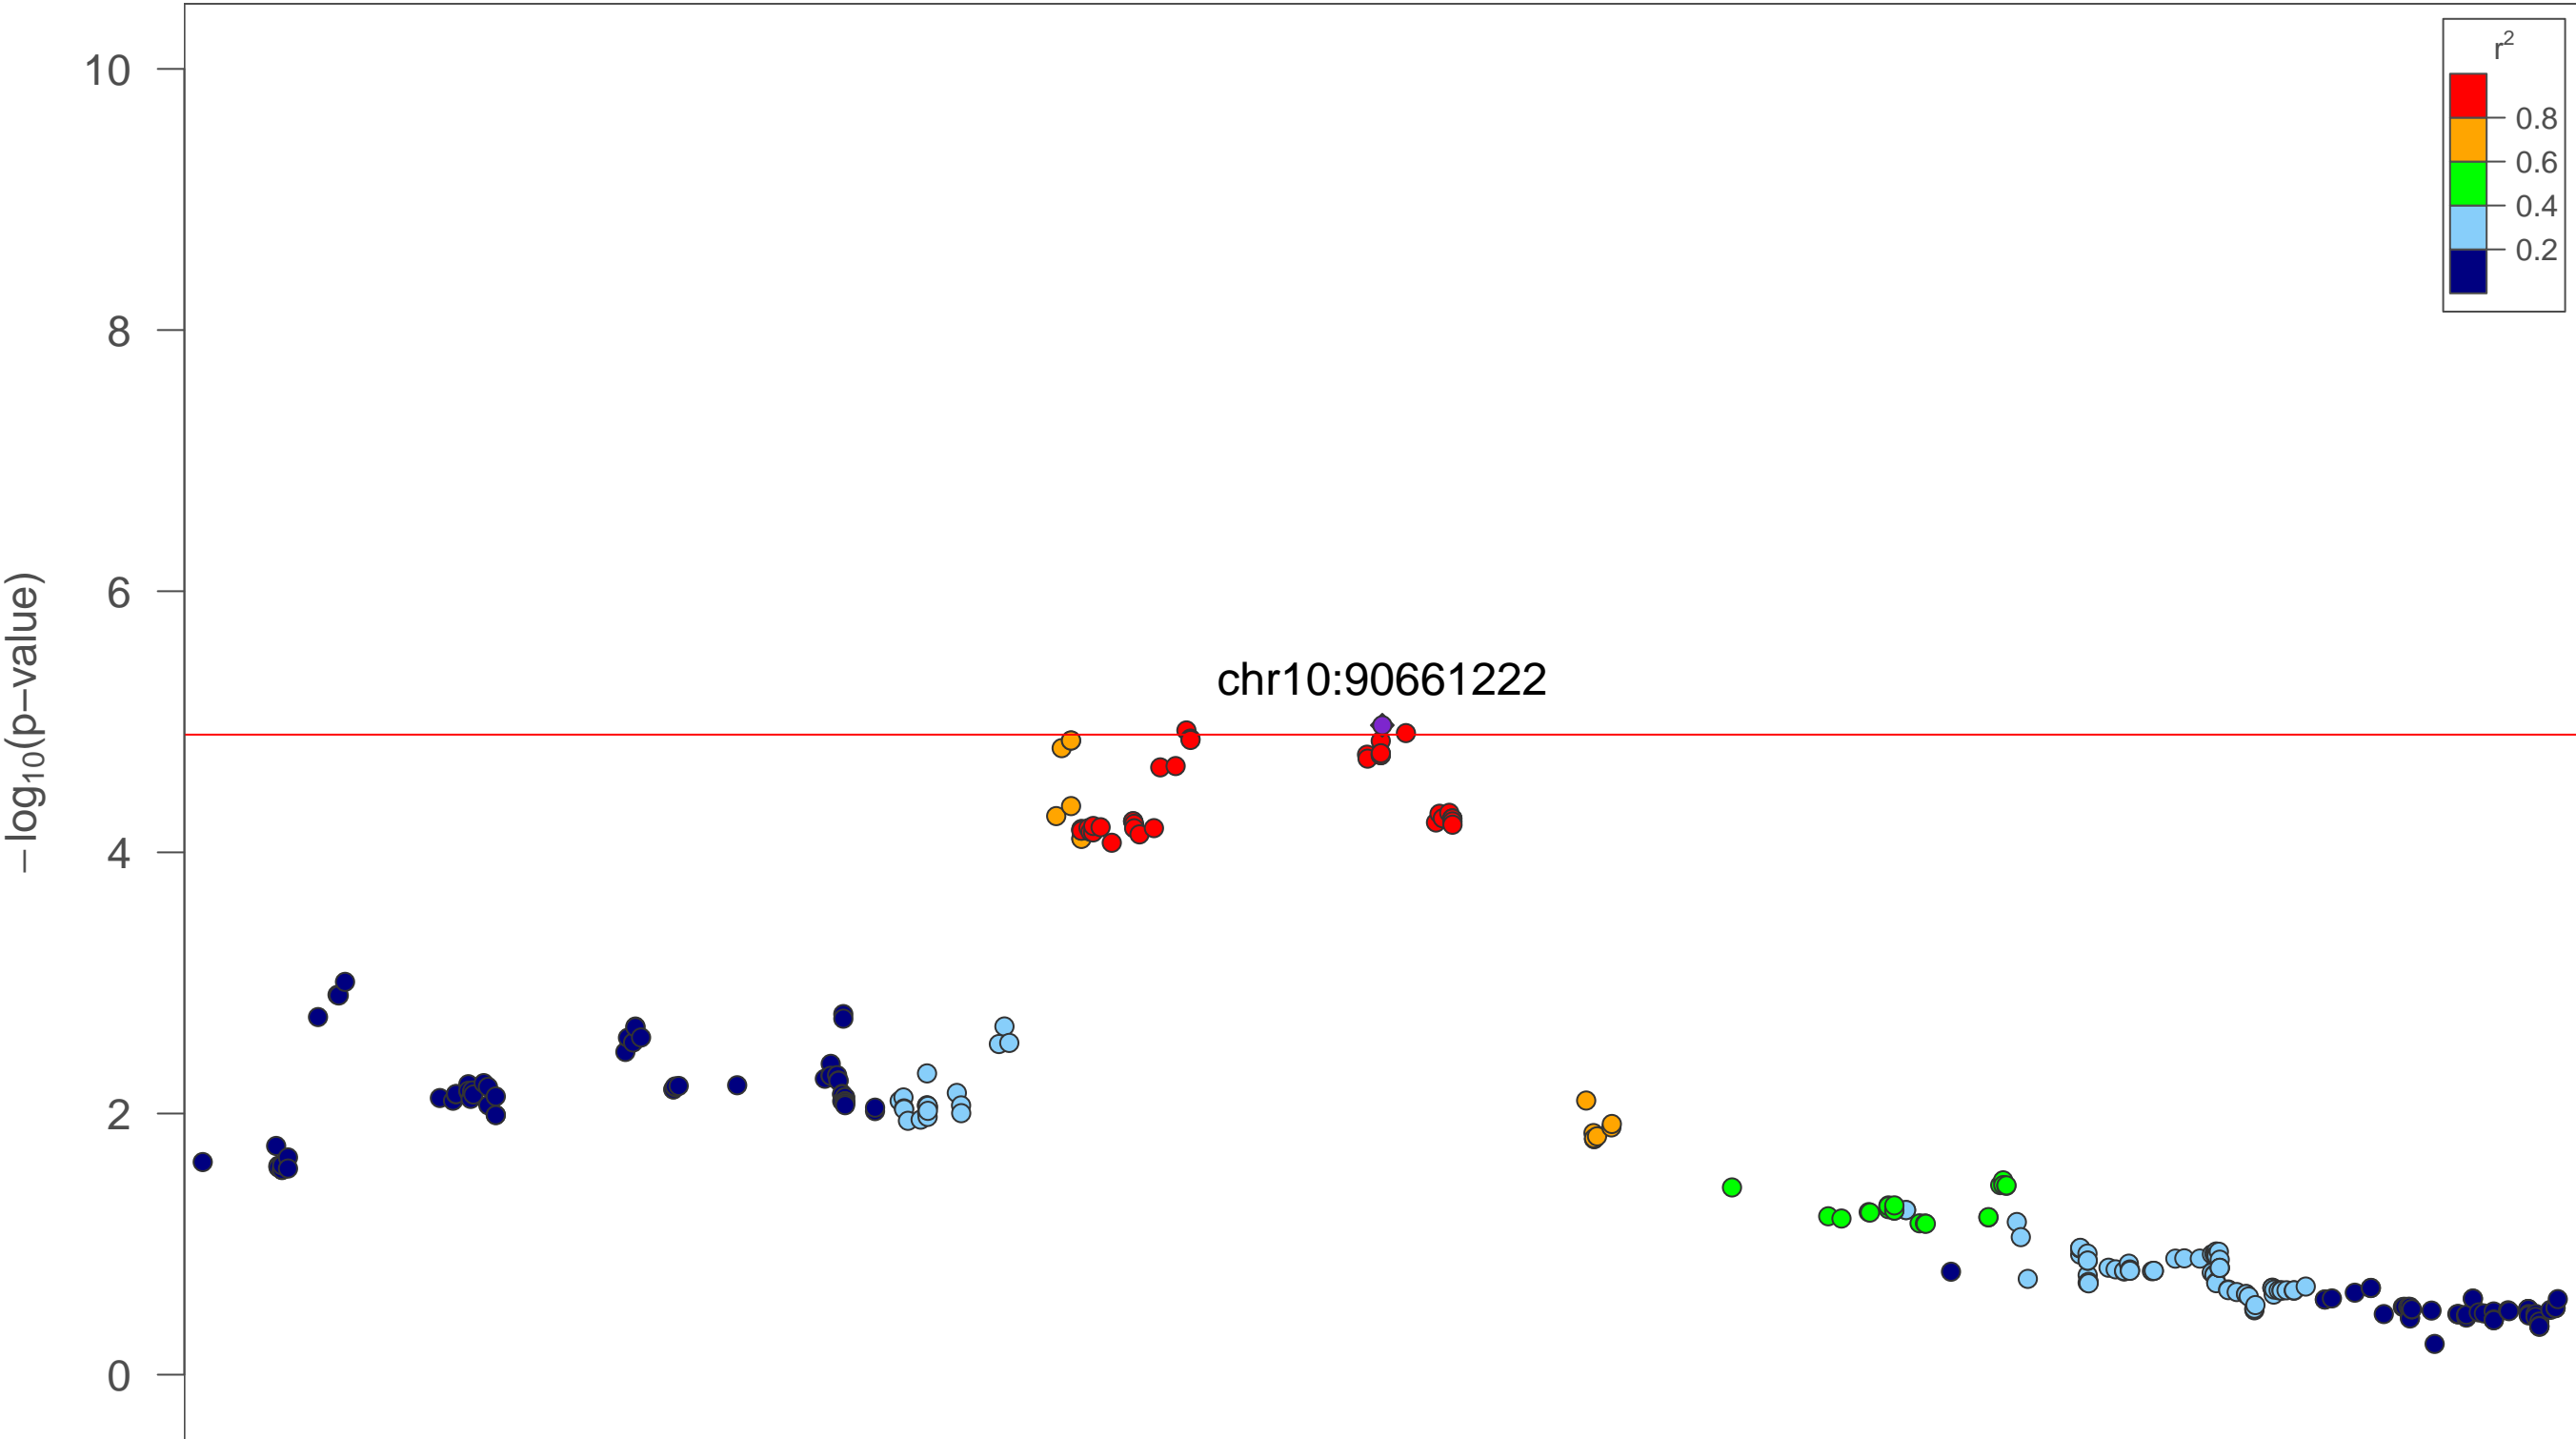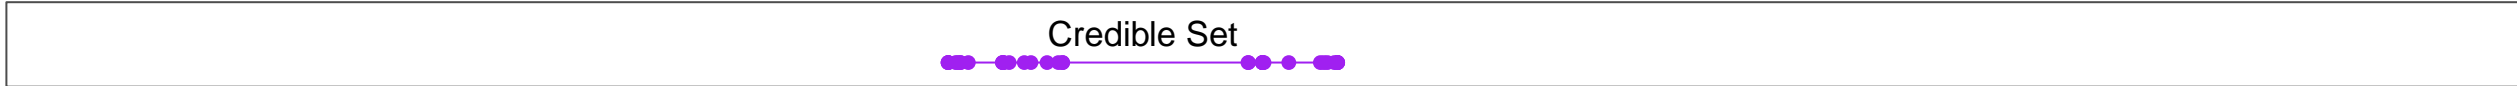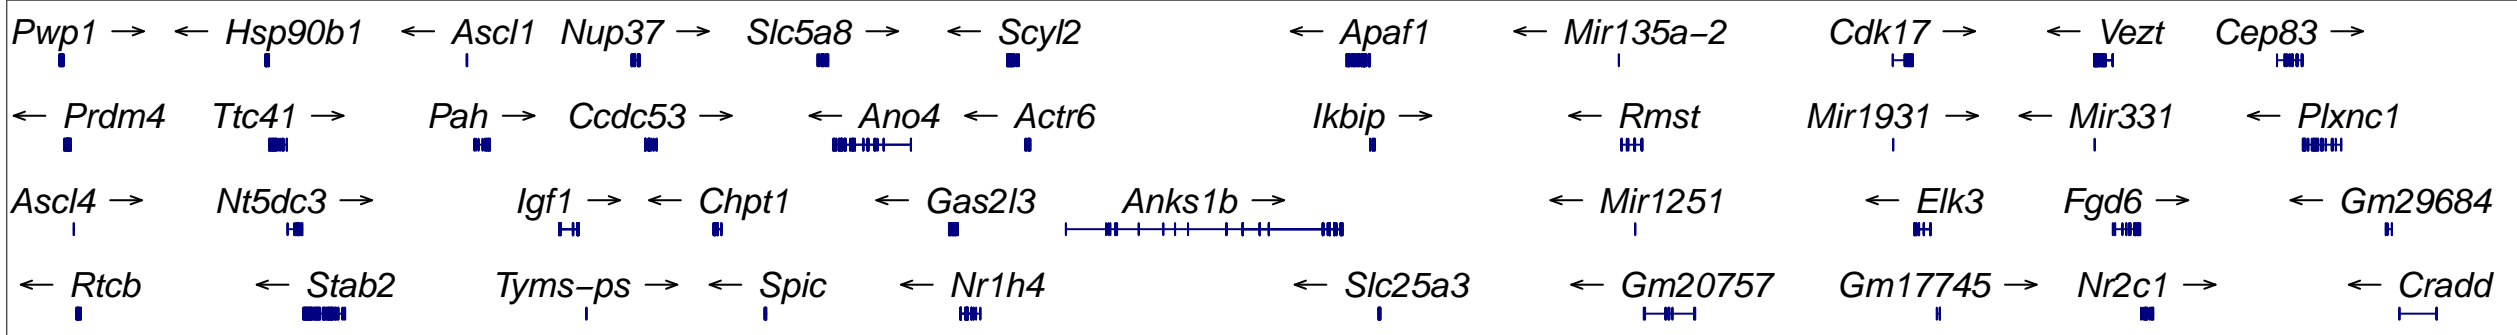

45 genes  
omitted

date: Thu Oct 25 17:23:56 2018  
build: F3943GBS  
display range: chr10:85661222–95661222 [85661222–95661222]  
hilite range: 0 – 0 [ 0 – 0 ]  
reference SNP: chr10:90661222  
number of SNPs plotted: 288  
min P-value: 1.06E–5 [chr10:90661222]  
max P-value: 5.81E–1 [chr10:95052984]  
omitted Genes: Bpifc, Fbxo7, Syn3  
omitted Genes: 4930486F22Rik, Timp3, 1810014B01Rik  
omitted Genes: 1700113H08Rik, Pmch, Parpbp  
omitted Genes: Dram1, Gnptab, Sycp3  
omitted Genes: Mybpc1, Gm4925, Arl1  
omitted Genes: Utp20, Slc17a8, 1500026H17Rik  
omitted Genes: Uhrf1bp1l, Tmpo, Nedd1  
omitted Genes: Mir7688, Lta4h, Hal  
omitted Genes: Amdhd1, Ccdc38, Snrpf  
omitted Genes: 4933408J17Rik, Ntn4, Gm8580  
omitted Genes: Gm15915, Usp44, Metap2  
omitted Genes: Ndufa12, Gm4792, Tmcc3  
omitted Genes: Mir7211, Cep83os, 2310039L15Rik  
omitted Genes: Socs2, 5730420D15Rik, Mrpl42  
omitted Genes: Ube2n, Nudt4, Mir3058

Fine-mapping Regions

| snp            | chr | pos (Mb) | pp         | group        | color  |
|----------------|-----|----------|------------|--------------|--------|
| chr10:89405556 | 10  | 89.40556 | 0.01211623 | Credible Set | purple |
| chr10:89405564 | 10  | 89.40556 | 0.01211623 | Credible Set | purple |
| chr10:89405589 | 10  | 89.40559 | 0.01182010 | Credible Set | purple |
| chr10:89405627 | 10  | 89.40563 | 0.01180355 | Credible Set | purple |
| chr10:89435280 | 10  | 89.43528 | 0.01232855 | Credible Set | purple |
| chr10:89443390 | 10  | 89.44339 | 0.01156987 | Credible Set | purple |
| chr10:89454154 | 10  | 89.45415 | 0.01146621 | Credible Set | purple |
| chr10:89454848 | 10  | 89.45485 | 0.01277391 | Credible Set | purple |
| chr10:89485534 | 10  | 89.48553 | 0.01250510 | Credible Set | purple |
| chr10:89621284 | 10  | 89.62128 | 0.01382924 | Credible Set | purple |
| chr10:89621319 | 10  | 89.62132 | 0.01381266 | Credible Set | purple |
| chr10:89625488 | 10  | 89.62549 | 0.01323555 | Credible Set | purple |
| chr10:89625559 | 10  | 89.62556 | 0.01228437 | Credible Set | purple |
| chr10:89647994 | 10  | 89.64799 | 0.01109332 | Credible Set | purple |
| chr10:89708192 | 10  | 89.70819 | 0.01231649 | Credible Set | purple |
| chr10:89734590 | 10  | 89.73459 | 0.03405194 | Credible Set | purple |
| chr10:89798643 | 10  | 89.79864 | 0.03481205 | Credible Set | purple |
| chr10:89843657 | 10  | 89.84366 | 0.06339964 | Credible Set | purple |
| chr10:89860498 | 10  | 89.86050 | 0.05525050 | Credible Set | purple |
| chr10:89860846 | 10  | 89.86085 | 0.05396630 | Credible Set | purple |
| chr10:90597510 | 10  | 90.59751 | 0.04215795 | Credible Set | purple |
| chr10:90599690 | 10  | 90.59969 | 0.03941872 | Credible Set | purple |
| chr10:90654718 | 10  | 90.65472 | 0.05308422 | Credible Set | purple |
| chr10:90654994 | 10  | 90.65499 | 0.04179892 | Credible Set | purple |
| chr10:90654998 | 10  | 90.65500 | 0.04282740 | Credible Set | purple |
| chr10:90655002 | 10  | 90.65500 | 0.04181644 | Credible Set | purple |
| chr10:90655039 | 10  | 90.65504 | 0.04316454 | Credible Set | purple |
| chr10:90661222 | 10  | 90.66122 | 0.06913804 | Credible Set | purple |
| chr10:90759813 | 10  | 90.75981 | 0.06057082 | Credible Set | purple |
| chr10:90885383 | 10  | 90.88538 | 0.01353082 | Credible Set | purple |
| chr10:90899946 | 10  | 90.89995 | 0.01566368 | Credible Set | purple |
| chr10:90913583 | 10  | 90.91358 | 0.01451603 | Credible Set | purple |
| chr10:90940720 | 10  | 90.94072 | 0.01591151 | Credible Set | purple |
| chr10:90953385 | 10  | 90.95338 | 0.01444023 | Credible Set | purple |
| chr10:90953402 | 10  | 90.95340 | 0.01448270 | Credible Set | purple |
| chr10:90953425 | 10  | 90.95342 | 0.01446890 | Credible Set | purple |

Fine-mapping Regions

| snp            | chr | pos (Mb) | pp         | group        | color  |
|----------------|-----|----------|------------|--------------|--------|
| chr10:90954053 | 10  | 90.95405 | 0.01376738 | Credible Set | purple |
| chr10:90954116 | 10  | 90.95412 | 0.01304015 | Credible Set | purple |

F39–43 GBS, open field, immobile duration in 10 minutes (s)

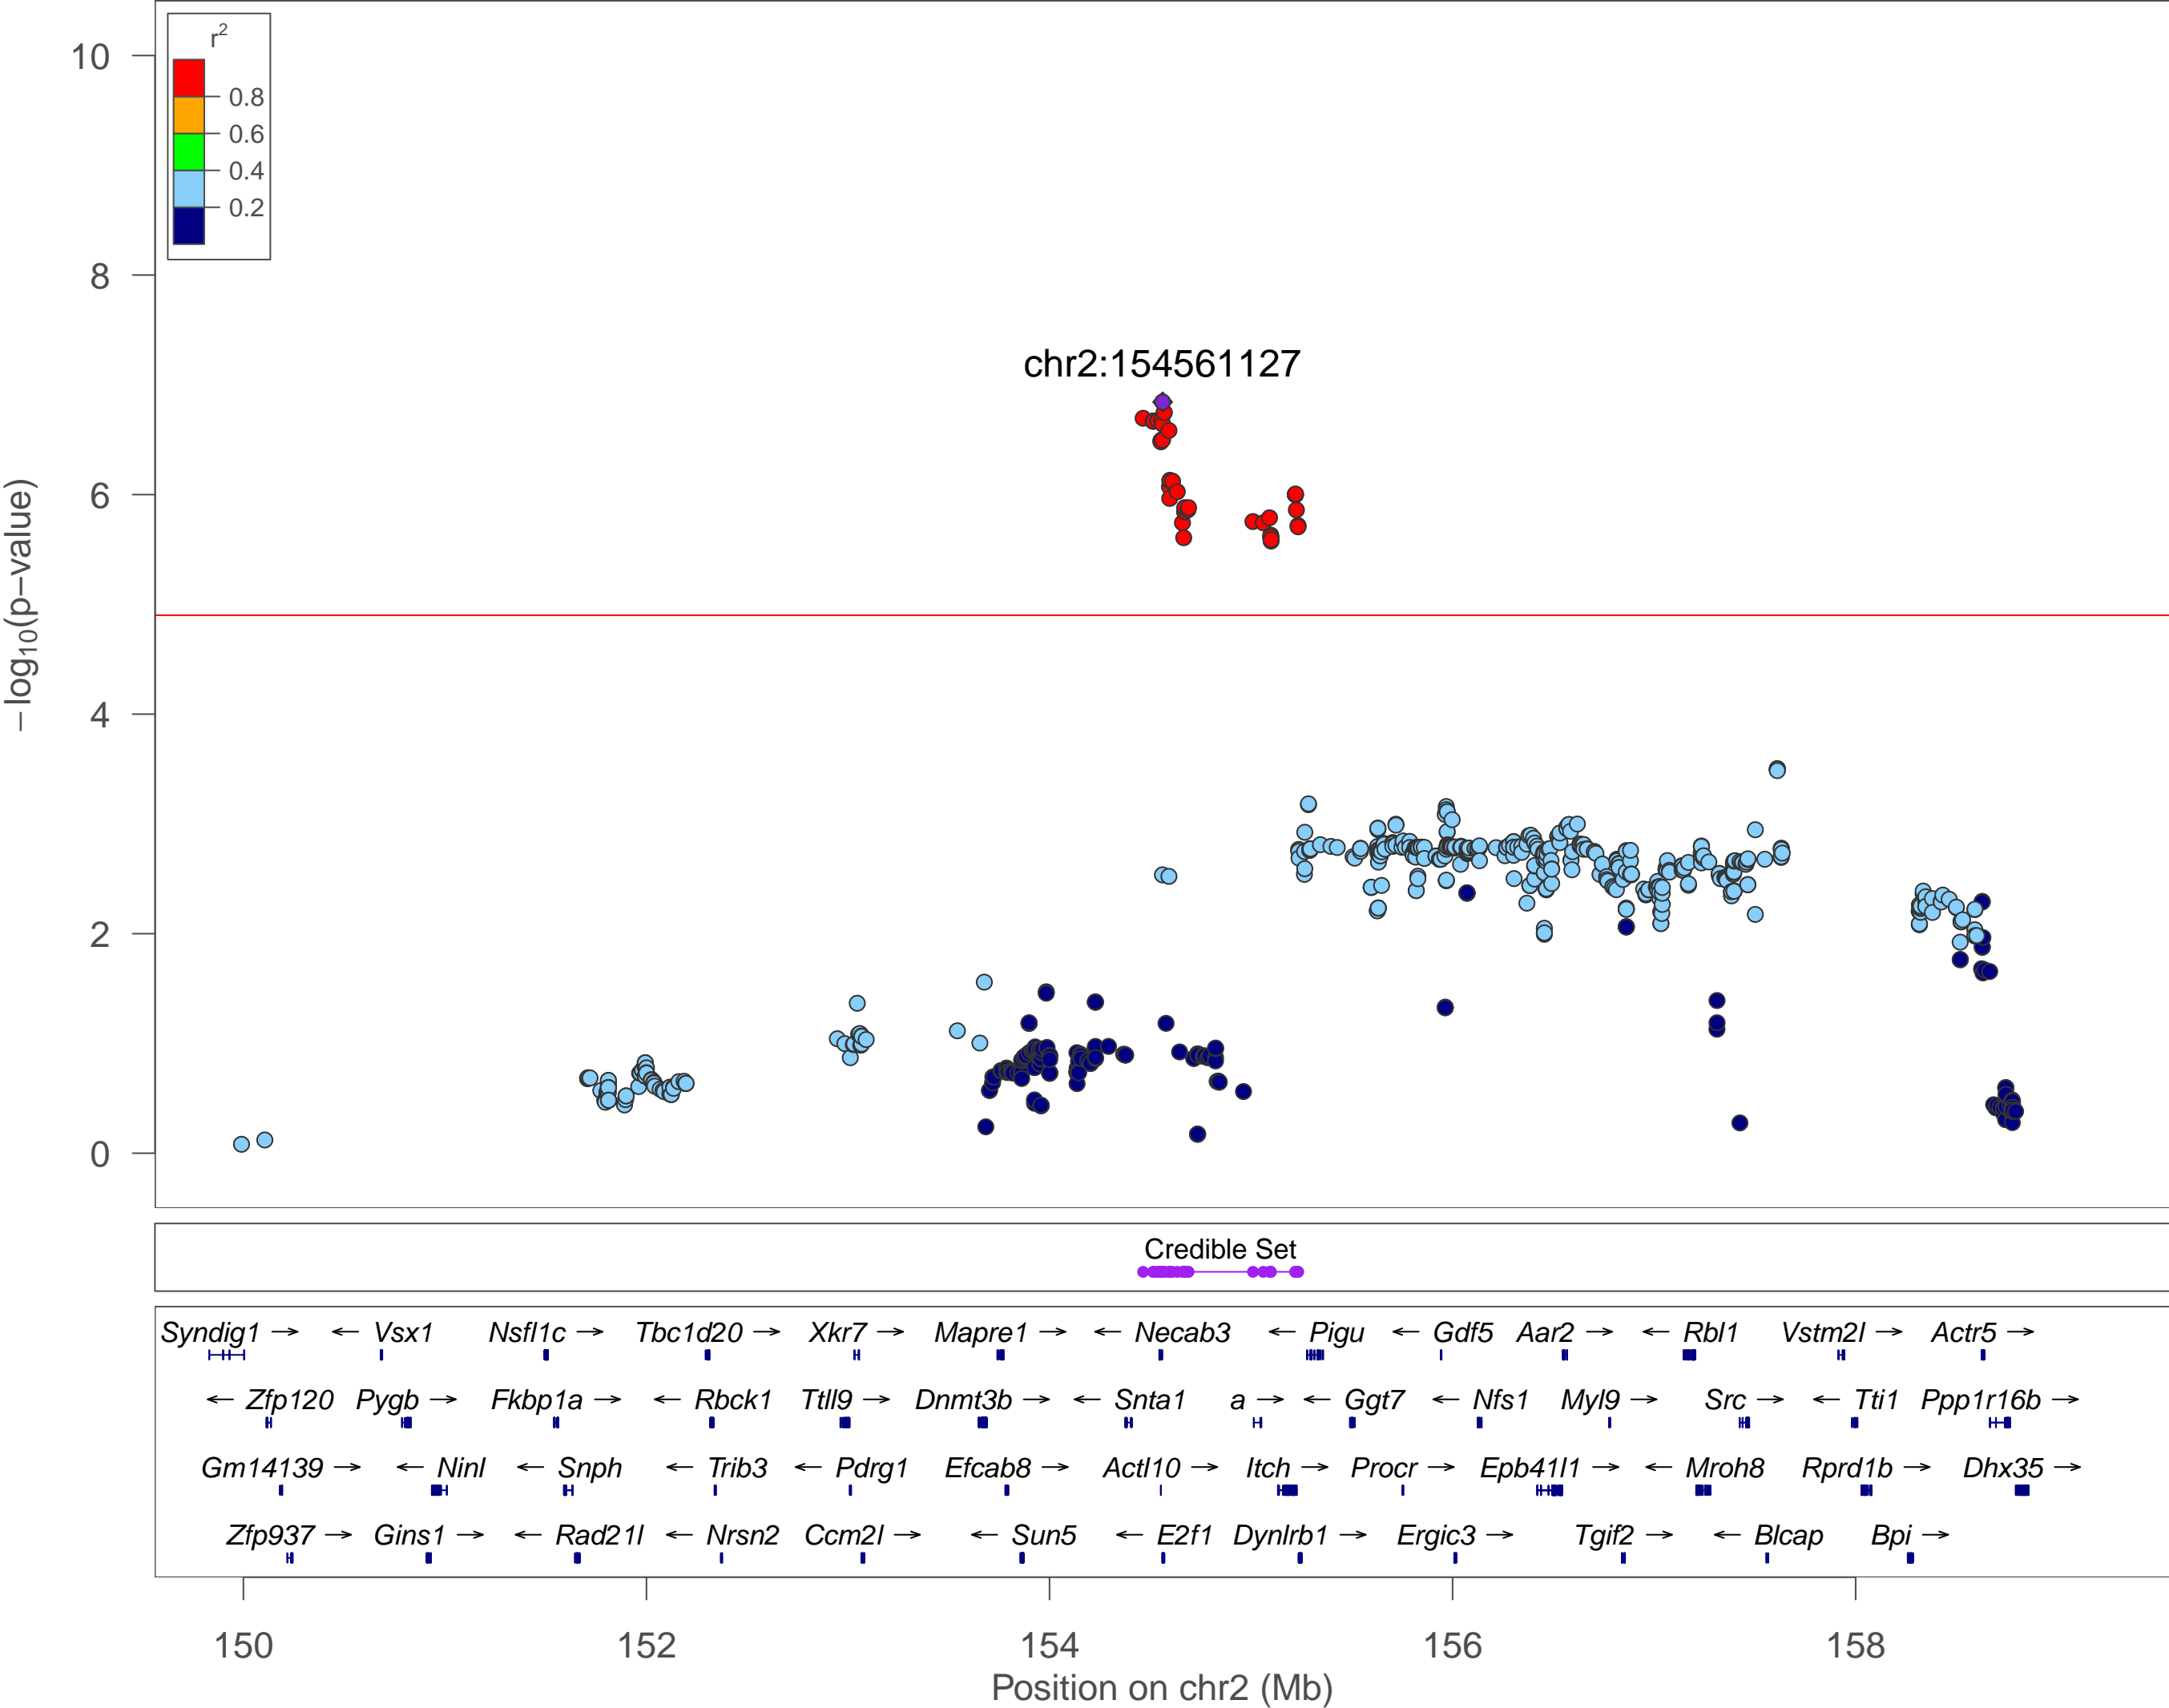

date: Thu Oct 25 17:23:01 2018

build: F3943GBS

display range: chr2:149561127–159561127 [149561127–159561127]

hilite range: 0 – 0 [ 0 – 0 ]

reference SNP: chr2:154561127

number of SNPs plotted: 757

min P-value: 1.43E–7 [chr2:154561127]

max P-value: 8.28E–1 [chr2:149990644]

omitted Genes: Gm14124, 3300002I08Rik, Zfp442

omitted Genes: Zfp345, Cst7, Apmap

omitted Genes: Acss1, E130215H24Rik, Entpd6

omitted Genes: Abhd12, Nanp, Gm14151

omitted Genes: 4930442J19Rik, LOC100125594, 4921509C19Rik

omitted Genes: Sdcbp2, Tmem74b, Psmf1

omitted Genes: Rspo4, Angpt4, Mir1953

omitted Genes: Fam110a, Slc52a3, Scrt2

omitted Genes: Srxn1, Tcf15, Csnk2a1

omitted Genes: Gm14164, Sox12, Zcchc3

omitted Genes: 6820408C15Rik, Defb23, Defb20

omitted Genes: Defb22, Defb26, Defb28

omitted Genes: Defb29, Defb21, Defb19

omitted Genes: Defb45, Defb36, Defb25

omitted Genes: Rem1, H13, Mcts2

omitted Genes: Id1, Cox4i2, Bcl2l1

omitted Genes: Tpx2, Mir5622, Mylk2

omitted Genes: Foxs1, Dusp15, Hck

omitted Genes: Tm9sf4, Tspyl3, Plagl2

omitted Genes: Pofut1, Kif3b, 2500004C02Rik

omitted Genes: Asxl1, Nol4l, Commd7

omitted Genes: Bpifb2, Bpifb6, Bpifb3

omitted Genes: Bpifb4, Bpifa6, Bpifa2

omitted Genes: Bpifa3, Bpifa1, Bpifa5

omitted Genes: Bpifb1, Bpifb5, Bpifb9a

omitted Genes: Bpifb9b, Cdk5rap1, Cbfa2t2

omitted Genes: 1700003F12Rik, Pxmp4, Zfp341

omitted Genes: Chmp4b, Raly, Eif2s2

omitted Genes: Ahcy, 2310005A03Rik, Map1lc3a

omitted Genes: Mir695, Trp53inp2, Ncoa6

omitted Genes: Acss2, Acss2os, Gss

omitted Genes: Myh7b, Mir499, Trpc4ap

Make more plots at <http://csg.sph.umich.edu/locuszoom/>



## Fine-mapping Regions

| snp            | chr | pos (Mb) | pp          | group        | color  |
|----------------|-----|----------|-------------|--------------|--------|
| chr2:154464466 | 2   | 154.4645 | 0.051164763 | Credible Set | purple |
| chr2:154513996 | 2   | 154.5140 | 0.048023099 | Credible Set | purple |
| chr2:154515752 | 2   | 154.5158 | 0.048448123 | Credible Set | purple |
| chr2:154516249 | 2   | 154.5162 | 0.048263220 | Credible Set | purple |
| chr2:154537995 | 2   | 154.5380 | 0.048967248 | Credible Set | purple |
| chr2:154538009 | 2   | 154.5380 | 0.048896921 | Credible Set | purple |
| chr2:154552607 | 2   | 154.5526 | 0.032573216 | Credible Set | purple |
| chr2:154552612 | 2   | 154.5526 | 0.031728222 | Credible Set | purple |
| chr2:154556468 | 2   | 154.5565 | 0.049374395 | Credible Set | purple |
| chr2:154560354 | 2   | 154.5604 | 0.033265595 | Credible Set | purple |
| chr2:154560360 | 2   | 154.5604 | 0.032895776 | Credible Set | purple |
| chr2:154560680 | 2   | 154.5607 | 0.045519233 | Credible Set | purple |
| chr2:154561127 | 2   | 154.5611 | 0.071188223 | Credible Set | purple |
| chr2:154569018 | 2   | 154.5690 | 0.057540698 | Credible Set | purple |
| chr2:154569036 | 2   | 154.5690 | 0.057432877 | Credible Set | purple |
| chr2:154592528 | 2   | 154.5925 | 0.039935441 | Credible Set | purple |
| chr2:154595741 | 2   | 154.5957 | 0.012837799 | Credible Set | purple |
| chr2:154595774 | 2   | 154.5958 | 0.012735284 | Credible Set | purple |
| chr2:154596294 | 2   | 154.5963 | 0.010112418 | Credible Set | purple |
| chr2:154597124 | 2   | 154.5971 | 0.014584592 | Credible Set | purple |
| chr2:154597483 | 2   | 154.5975 | 0.014398781 | Credible Set | purple |
| chr2:154610318 | 2   | 154.6103 | 0.014319167 | Credible Set | purple |
| chr2:154633945 | 2   | 154.6339 | 0.011567385 | Credible Set | purple |
| chr2:154659631 | 2   | 154.6596 | 0.006176648 | Credible Set | purple |
| chr2:154665835 | 2   | 154.6658 | 0.004574325 | Credible Set | purple |
| chr2:154670525 | 2   | 154.6705 | 0.007725612 | Credible Set | purple |
| chr2:154670528 | 2   | 154.6705 | 0.007729226 | Credible Set | purple |
| chr2:154670562 | 2   | 154.6706 | 0.007791349 | Credible Set | purple |
| chr2:154670571 | 2   | 154.6706 | 0.008385732 | Credible Set | purple |
| chr2:154686815 | 2   | 154.6868 | 0.008042347 | Credible Set | purple |
| chr2:154689824 | 2   | 154.6898 | 0.008385389 | Credible Set | purple |
| chr2:155009299 | 2   | 155.0093 | 0.006336677 | Credible Set | purple |
| chr2:155060609 | 2   | 155.0606 | 0.006174878 | Credible Set | purple |
| chr2:155091628 | 2   | 155.0916 | 0.006841165 | Credible Set | purple |
| chr2:155097606 | 2   | 155.0976 | 0.004820513 | Credible Set | purple |
| chr2:155097628 | 2   | 155.0976 | 0.004623856 | Credible Set | purple |

Fine-mapping Regions

| snp            | chr | pos (Mb) | pp          | group        | color  |
|----------------|-----|----------|-------------|--------------|--------|
| chr2:155097650 | 2   | 155.0976 | 0.004634884 | Credible Set | purple |
| chr2:155220007 | 2   | 155.2200 | 0.010901354 | Credible Set | purple |
| chr2:155220040 | 2   | 155.2200 | 0.010901354 | Credible Set | purple |
| chr2:155220051 | 2   | 155.2201 | 0.010901354 | Credible Set | purple |
| chr2:155220725 | 2   | 155.2207 | 0.011057406 | Credible Set | purple |
| chr2:155224800 | 2   | 155.2248 | 0.008009014 | Credible Set | purple |
| chr2:155233215 | 2   | 155.2332 | 0.005844886 | Credible Set | purple |
| chr2:155233265 | 2   | 155.2333 | 0.005699991 | Credible Set | purple |

F39–43 GBS, open field, immobile duration in 10 minutes (s)

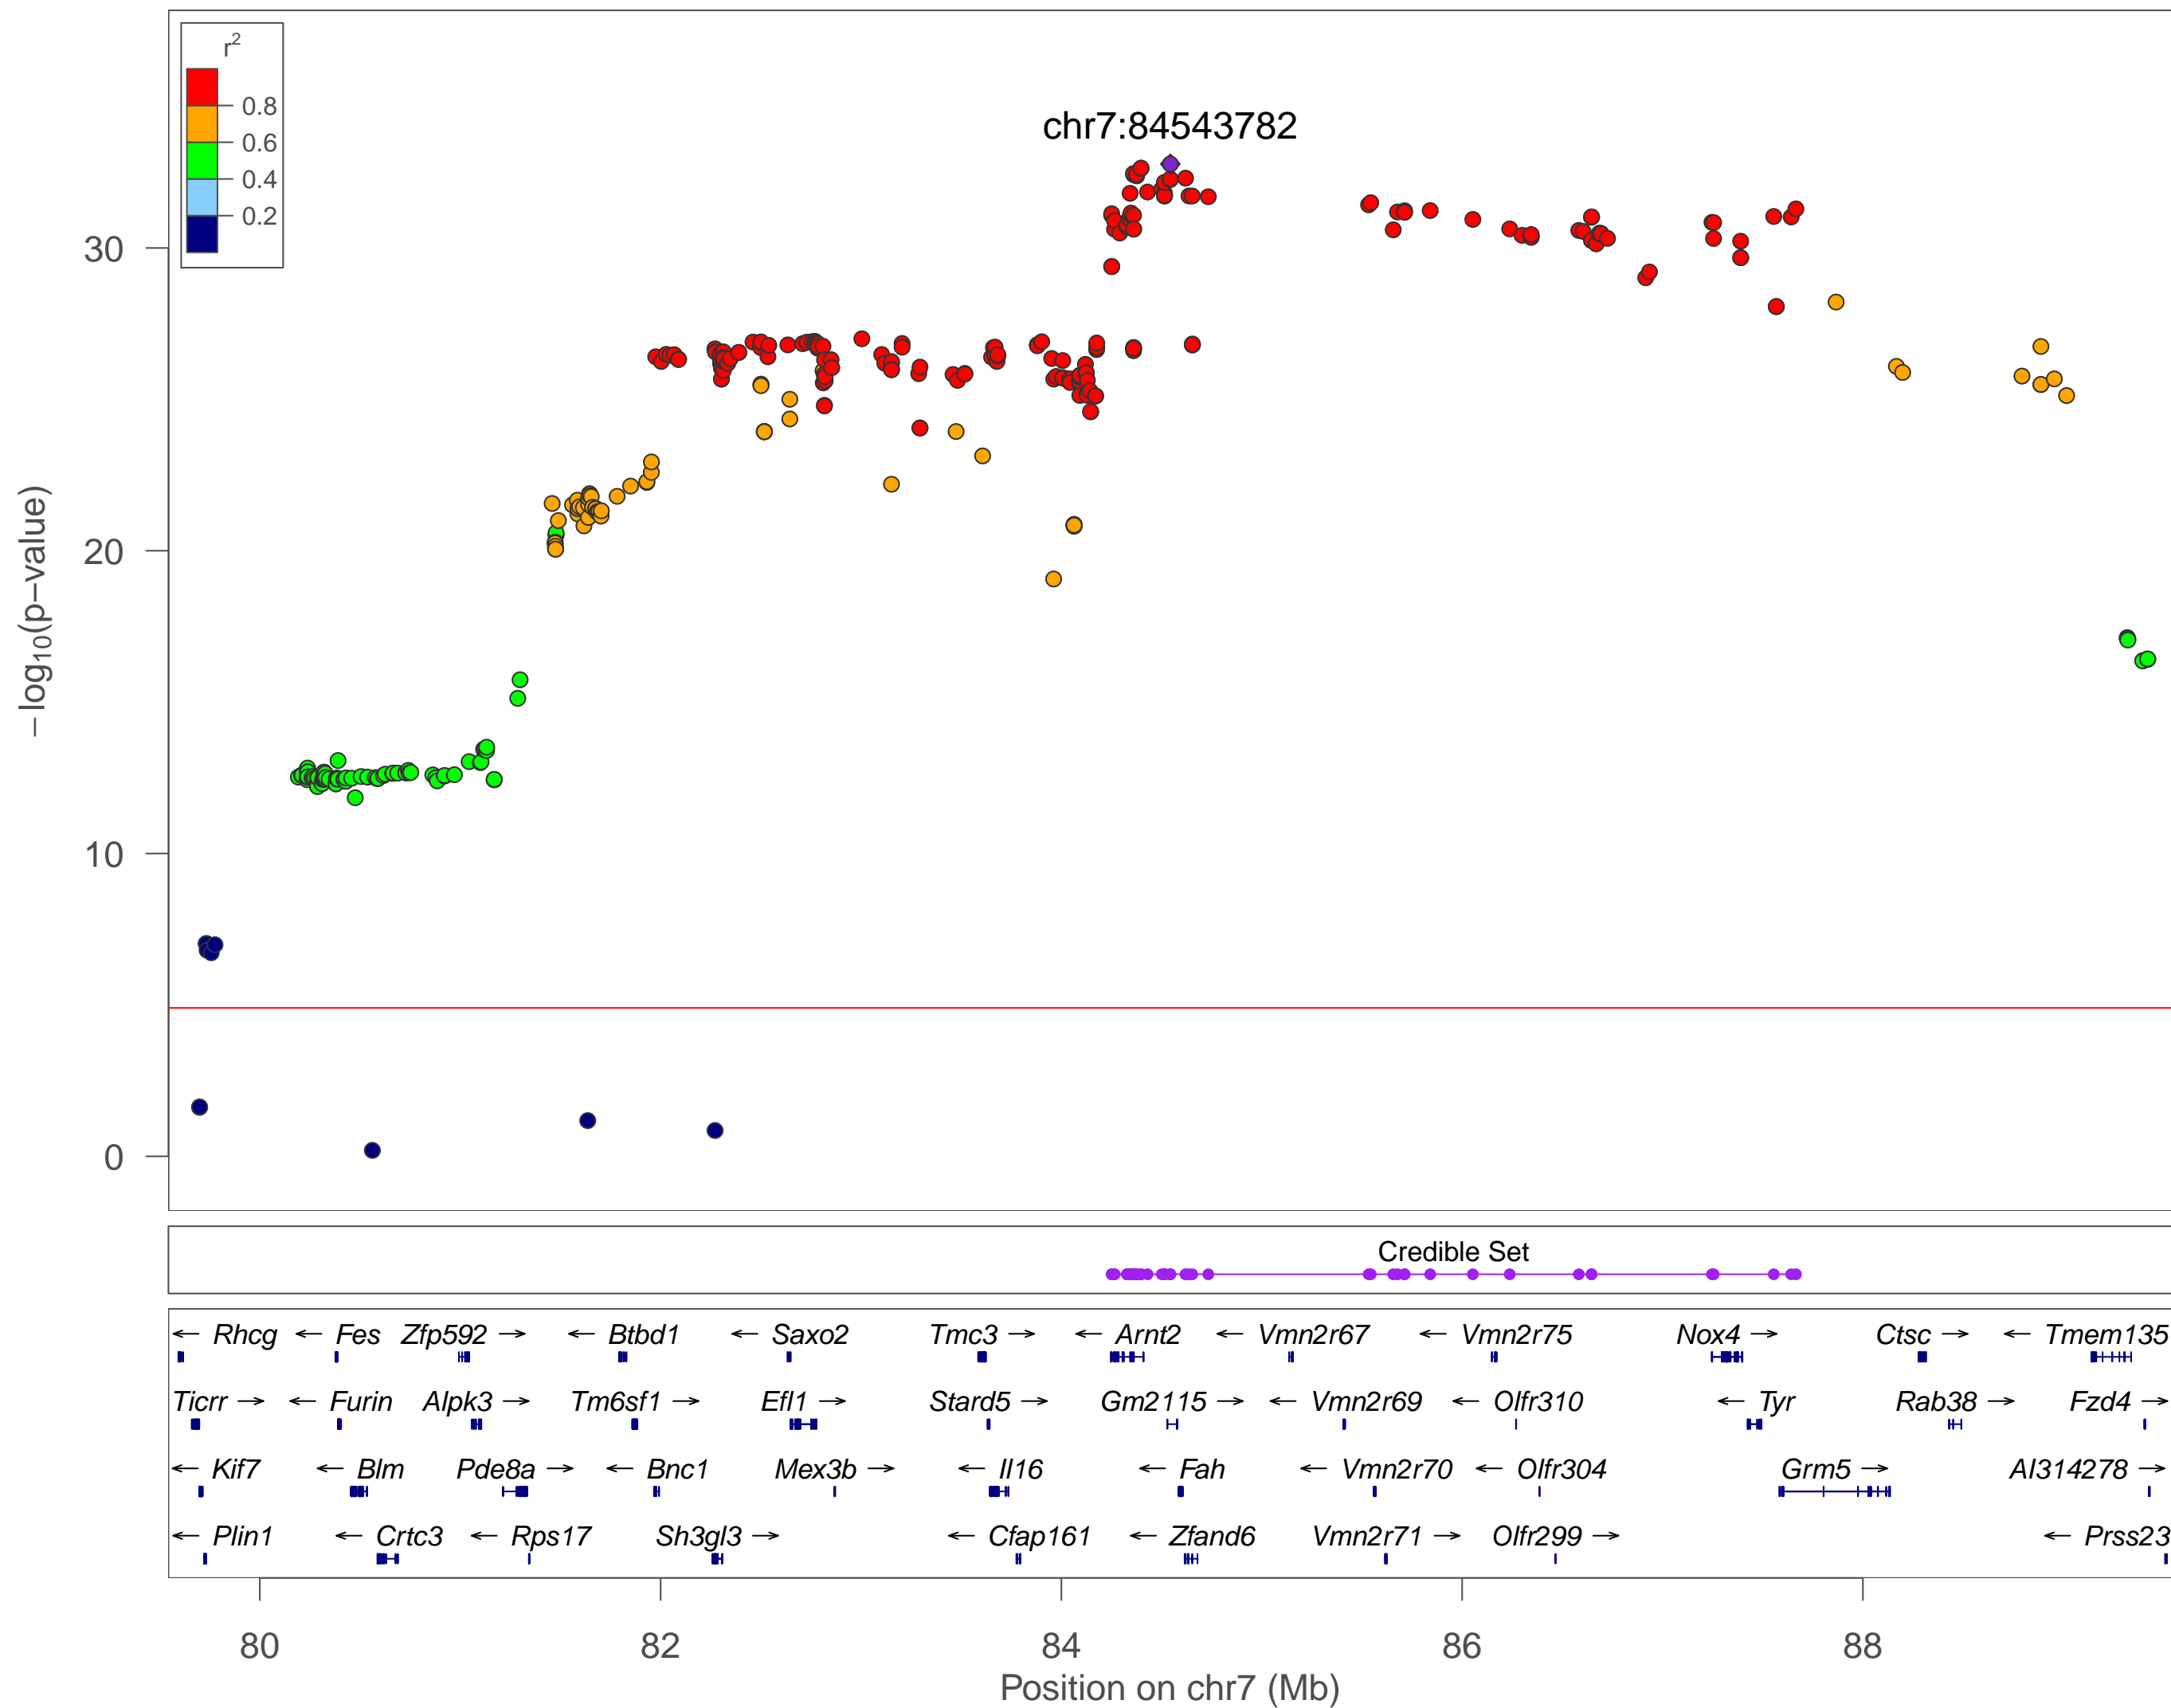

date: Thu Oct 25 17:23:11 2018  
build: F3943GBS  
display range: chr7:79543782–89543782 [79543782–89543782]  
hilite range: 0 – 0 [ 0 – 0 ]  
reference SNP: chr7:84543782  
number of SNPs plotted: 390  
min P-value: 1.69E–33 [chr7:84543782]  
max P-value: 6.35E–1 [chr7:80561830]  
omitted Genes: Pex11a, Wdr93, Mesp1  
omitted Genes: Mesp2, Anpep, Ap3s2  
omitted Genes: Arpin, Zfp710, Gm21057  
omitted Genes: Idh2, Sema4b, Cib1  
omitted Genes: Gdpgp1, Tll13, Ngrn  
omitted Genes: Vps33b, Prc1, Rccd1  
omitted Genes: Unc45a, Hddc3, Man2a2  
omitted Genes: Gm15880, Iqgap1, Zscan2  
omitted Genes: Wdr73, Nmb, Sec11a  
omitted Genes: Slc28a1, Cpeb1, Ap3b2  
omitted Genes: BC048679, 2900076A07Rik, Mir1839  
omitted Genes: Fsd2, Whamm, Homer2  
omitted Genes: Fam103a1, 3110040N11Rik, Hdgfrp3  
omitted Genes: Gm20744, Adamtsl3, 4933406J10Rik  
omitted Genes: 4933430H16Rik, Mesdc1, Mesdc2  
omitted Genes: Cemip, Abhd17c, 2610206C17Rik  
omitted Genes: Olfr291, Olfr290, Vmn2r65  
omitted Genes: Vmn2r66, Vmn2r68, Vmn2r72  
omitted Genes: Vmn2r73, Vmn2r74, Vmn2r76  
omitted Genes: Olfr309, Olfr308, Olfr307  
omitted Genes: Olfr305, Olfr303, Olfr301  
omitted Genes: Olfr298, Olfr297, Olfr295  
omitted Genes: Olfr294, Olfr293, Olfr292  
omitted Genes: Folh1, Vmn2r77, Vmn2r78  
omitted Genes: Vmn2r79

## Fine-mapping Regions

| snp           | chr | pos (Mb) | pp           | group        | color  |
|---------------|-----|----------|--------------|--------------|--------|
| chr7:84250985 | 7   | 84.25099 | 0.0025162275 | Credible Set | purple |
| chr7:84251011 | 7   | 84.25101 | 0.0028294597 | Credible Set | purple |
| chr7:84265410 | 7   | 84.26541 | 0.0008798686 | Credible Set | purple |
| chr7:84265685 | 7   | 84.26569 | 0.0016549308 | Credible Set | purple |
| chr7:84327288 | 7   | 84.32729 | 0.0010533763 | Credible Set | purple |
| chr7:84327808 | 7   | 84.32781 | 0.0012331951 | Credible Set | purple |
| chr7:84327850 | 7   | 84.32785 | 0.0012347214 | Credible Set | purple |
| chr7:84338595 | 7   | 84.33859 | 0.0019602362 | Credible Set | purple |
| chr7:84343118 | 7   | 84.34312 | 0.0131853721 | Credible Set | purple |
| chr7:84344805 | 7   | 84.34480 | 0.0025040726 | Credible Set | purple |
| chr7:84347423 | 7   | 84.34742 | 0.0029631230 | Credible Set | purple |
| chr7:84360038 | 7   | 84.36004 | 0.0025151078 | Credible Set | purple |
| chr7:84360626 | 7   | 84.36063 | 0.0008943498 | Credible Set | purple |
| chr7:84360642 | 7   | 84.36064 | 0.0008787910 | Credible Set | purple |
| chr7:84360703 | 7   | 84.36070 | 0.0541024657 | Credible Set | purple |
| chr7:84360714 | 7   | 84.36071 | 0.0582167848 | Credible Set | purple |
| chr7:84360716 | 7   | 84.36072 | 0.0582167848 | Credible Set | purple |
| chr7:84375526 | 7   | 84.37553 | 0.0491642099 | Credible Set | purple |
| chr7:84375577 | 7   | 84.37558 | 0.0522902104 | Credible Set | purple |
| chr7:84375642 | 7   | 84.37564 | 0.0543287044 | Credible Set | purple |
| chr7:84397575 | 7   | 84.39758 | 0.0877330639 | Credible Set | purple |
| chr7:84397597 | 7   | 84.39760 | 0.0880304180 | Credible Set | purple |
| chr7:84430102 | 7   | 84.43010 | 0.0145224597 | Credible Set | purple |
| chr7:84501082 | 7   | 84.50108 | 0.0180773249 | Credible Set | purple |
| chr7:84514082 | 7   | 84.51408 | 0.0280583866 | Credible Set | purple |
| chr7:84514444 | 7   | 84.51444 | 0.0112579762 | Credible Set | purple |
| chr7:84514505 | 7   | 84.51450 | 0.0106321952 | Credible Set | purple |
| chr7:84514564 | 7   | 84.51456 | 0.0130934303 | Credible Set | purple |
| chr7:84514575 | 7   | 84.51457 | 0.0110187035 | Credible Set | purple |
| chr7:84514734 | 7   | 84.51473 | 0.0302152868 | Credible Set | purple |
| chr7:84543346 | 7   | 84.54335 | 0.0373559777 | Credible Set | purple |
| chr7:84543355 | 7   | 84.54336 | 0.0389205248 | Credible Set | purple |
| chr7:84543782 | 7   | 84.54378 | 0.1203381884 | Credible Set | purple |
| chr7:84619632 | 7   | 84.61963 | 0.0413522640 | Credible Set | purple |
| chr7:84636759 | 7   | 84.63676 | 0.0107822552 | Credible Set | purple |
| chr7:84653095 | 7   | 84.65309 | 0.0107428651 | Credible Set | purple |

## Fine-mapping Regions

| snp           | chr | pos (Mb) | pp           | group        | color  |
|---------------|-----|----------|--------------|--------------|--------|
| chr7:84733186 | 7   | 84.73319 | 0.0101730164 | Credible Set | purple |
| chr7:85533207 | 7   | 85.53321 | 0.0055404757 | Credible Set | purple |
| chr7:85543843 | 7   | 85.54384 | 0.0064939262 | Credible Set | purple |
| chr7:85656243 | 7   | 85.65624 | 0.0008365762 | Credible Set | purple |
| chr7:85677494 | 7   | 85.67749 | 0.0032155380 | Credible Set | purple |
| chr7:85712663 | 7   | 85.71266 | 0.0035325306 | Credible Set | purple |
| chr7:85712975 | 7   | 85.71298 | 0.0031447501 | Credible Set | purple |
| chr7:85840665 | 7   | 85.84067 | 0.0035804567 | Credible Set | purple |
| chr7:86053386 | 7   | 86.05339 | 0.0018307574 | Credible Set | purple |
| chr7:86237374 | 7   | 86.23737 | 0.0008958302 | Credible Set | purple |
| chr7:86582139 | 7   | 86.58214 | 0.0007973163 | Credible Set | purple |
| chr7:86645719 | 7   | 86.64572 | 0.0021693658 | Credible Set | purple |
| chr7:86645792 | 7   | 86.64579 | 0.0022281328 | Credible Set | purple |
| chr7:87246786 | 7   | 87.24679 | 0.0014708473 | Credible Set | purple |
| chr7:87255156 | 7   | 87.25516 | 0.0014480939 | Credible Set | purple |
| chr7:87554961 | 7   | 87.55496 | 0.0022912610 | Credible Set | purple |
| chr7:87642045 | 7   | 87.64204 | 0.0022093291 | Credible Set | purple |
| chr7:87665727 | 7   | 87.66573 | 0.0040732812 | Credible Set | purple |

F39–43 GBS, open field, distance moved in total in 2nd 5 minutes (cm)

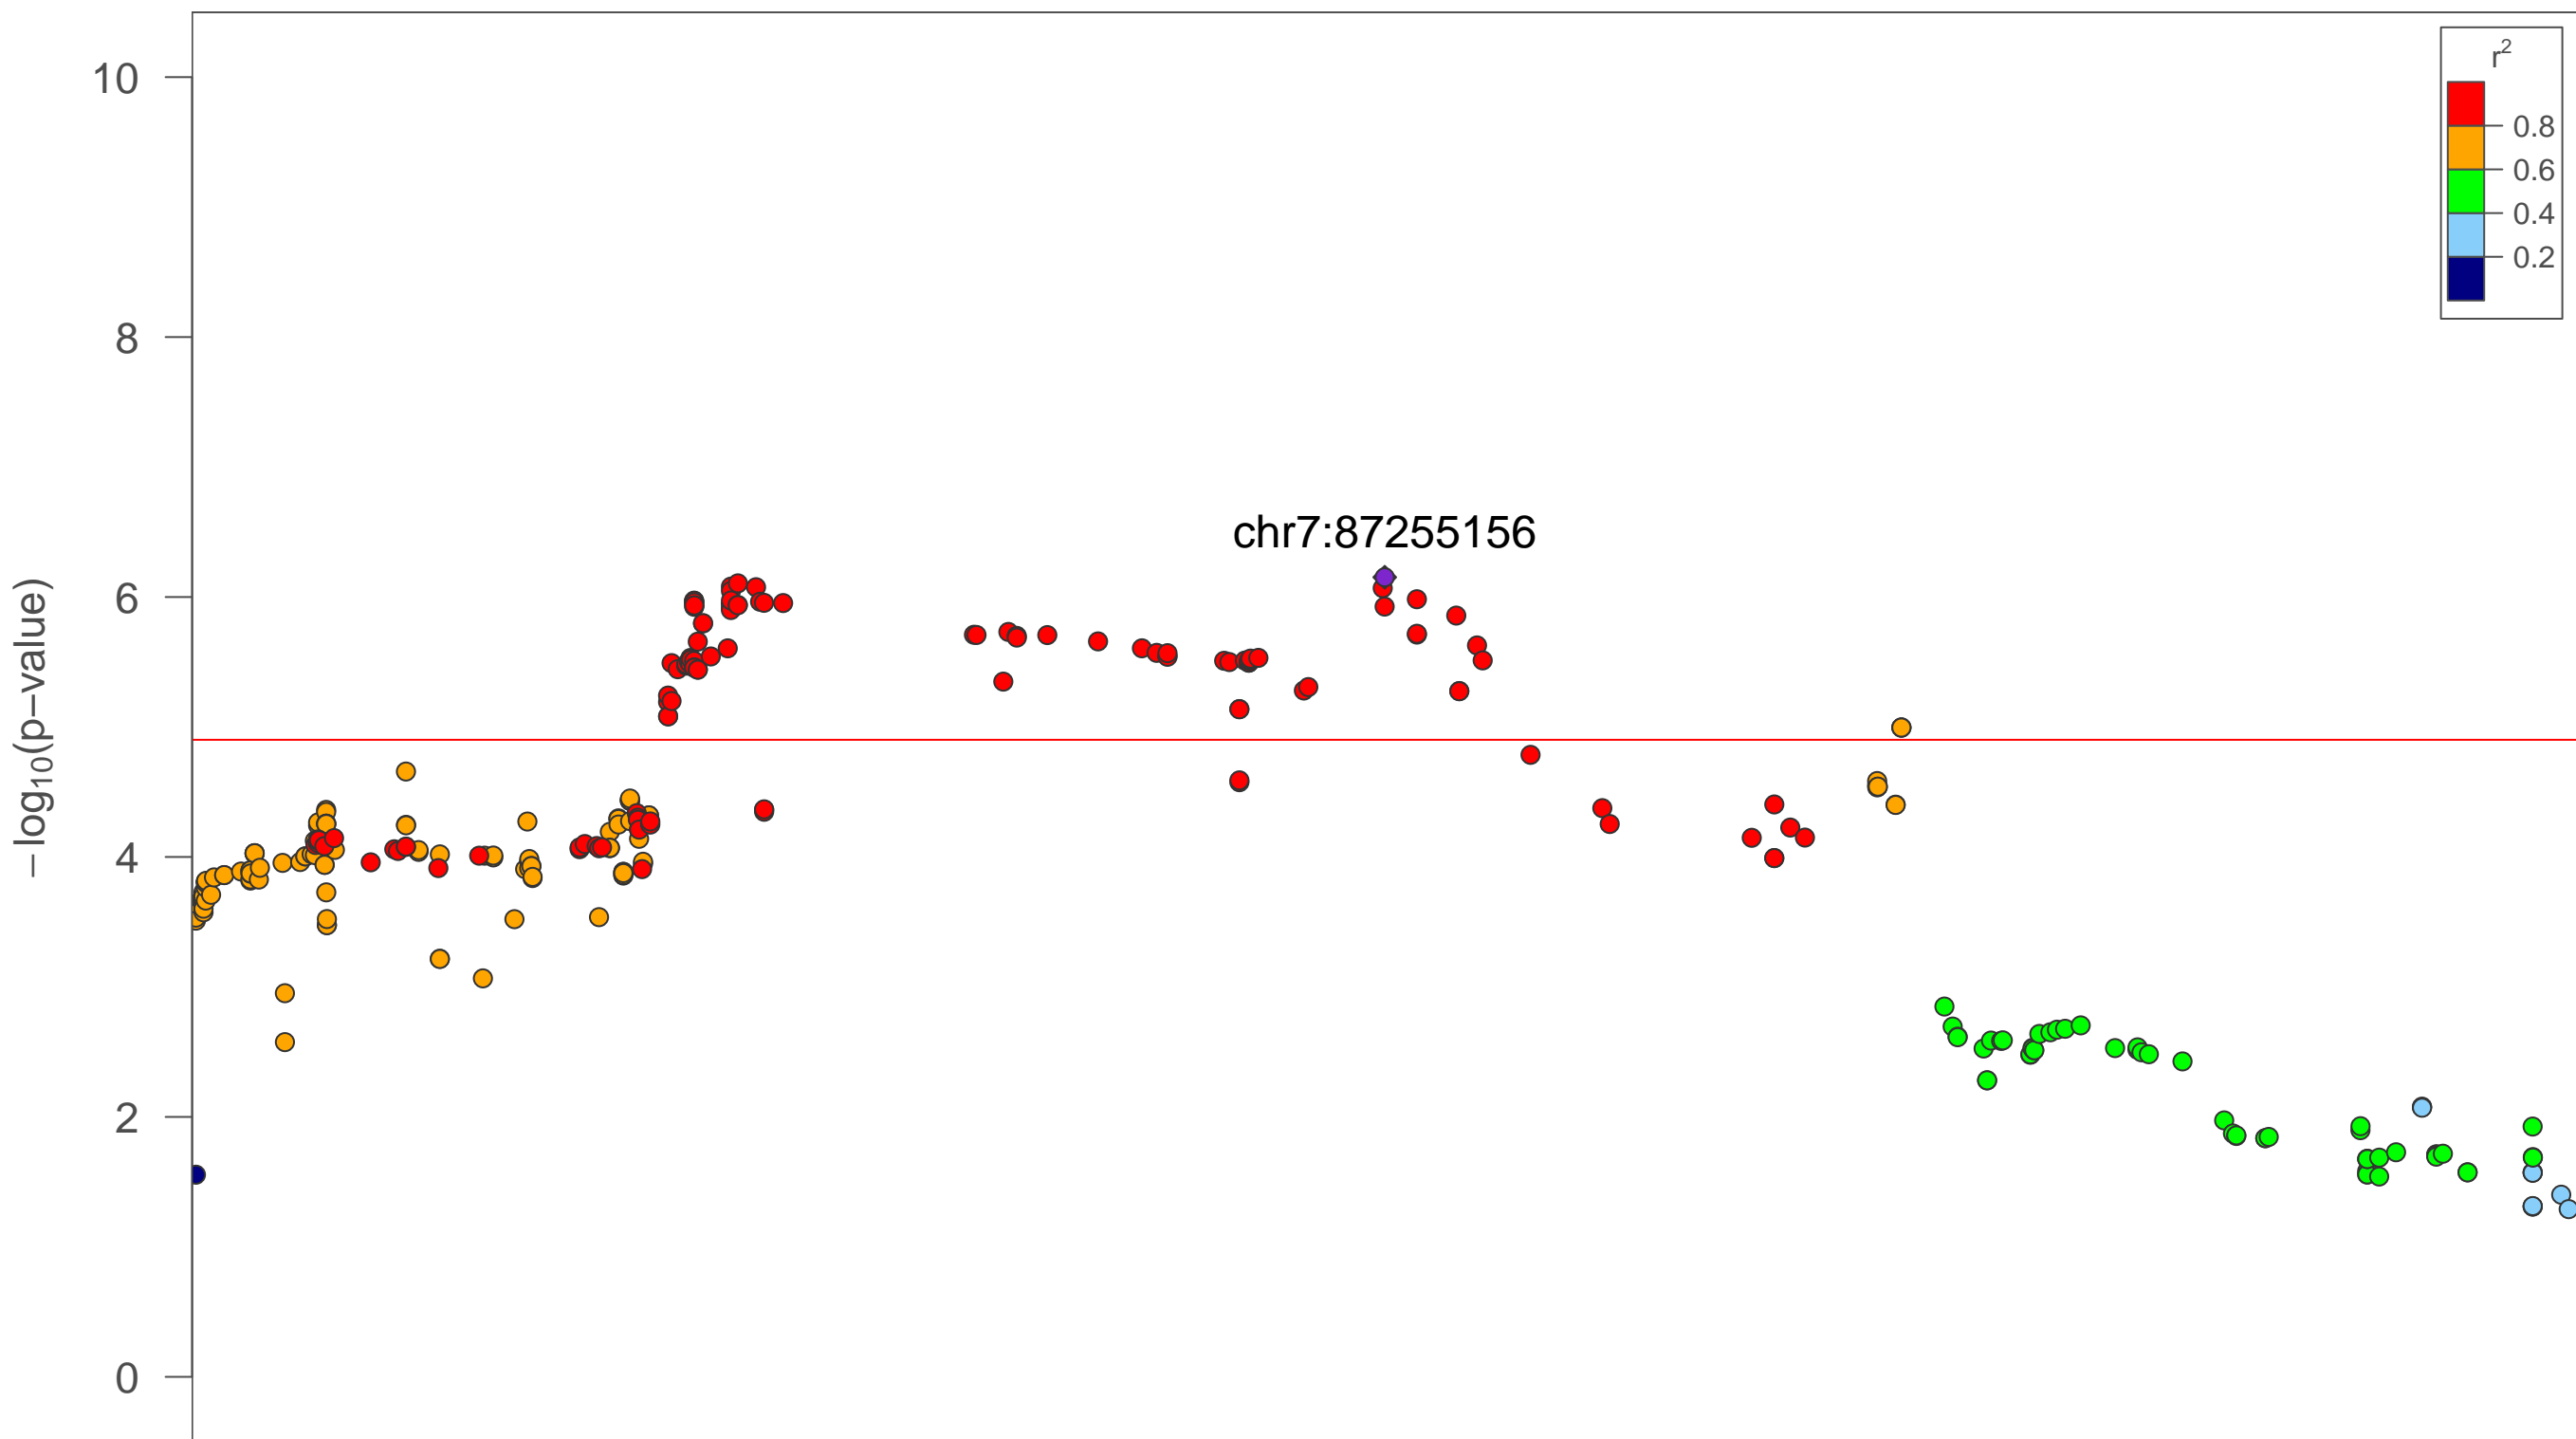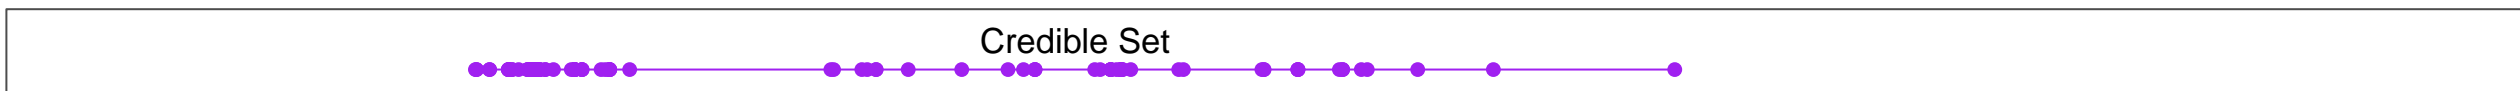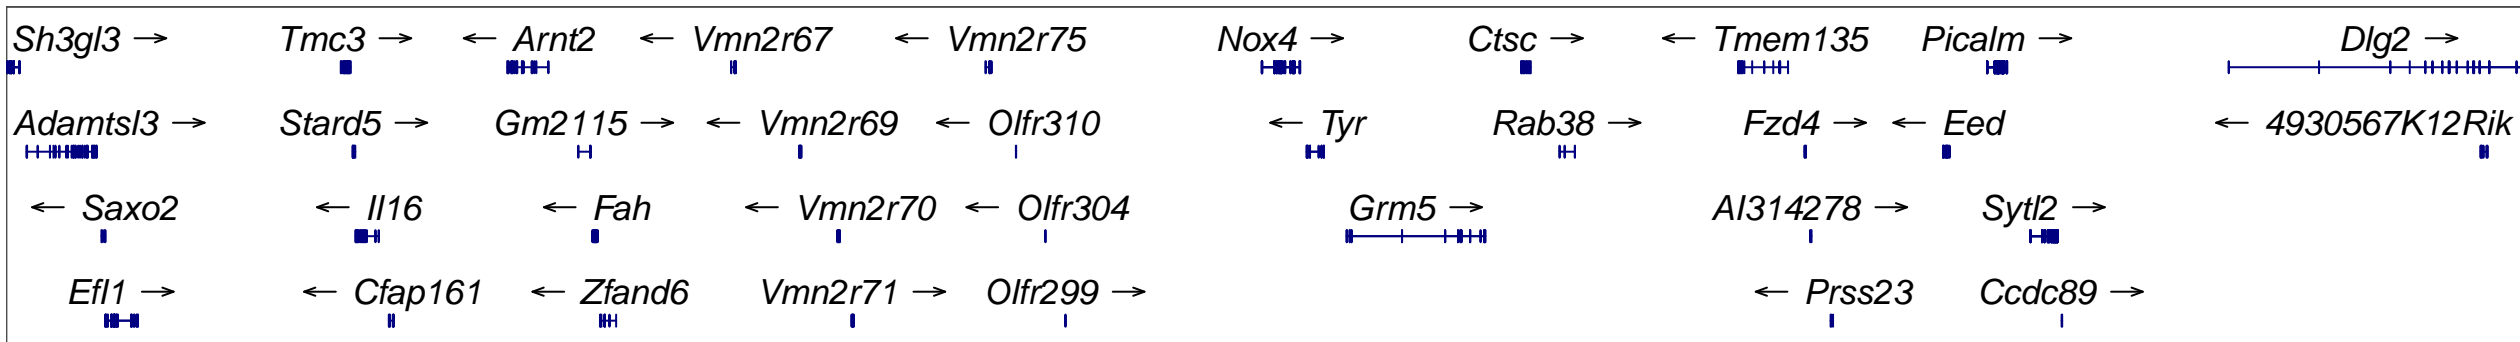

42 genes  
omitted

date: Thu Oct 25 17:25:16 2018  
build: F3943GBS  
display range: chr7:82255156–92255156 [82255156–92255156]  
hilite range: 0 – 0 [ 0 – 0 ]  
reference SNP: chr7:87255156  
number of SNPs plotted: 313  
min P-value: 7.04E–7 [chr7:87255156]  
max P-value: 5.12E–2 [chr7:92218225]  
omitted Genes: 4933406J10Rik, Mex3b, 4933430H16Rik  
omitted Genes: Mesdc1, Mesdc2, Cemip  
omitted Genes: Abhd17c, 2610206C17Rik, Olfr291  
omitted Genes: Olfr290, Vmn2r65, Vmn2r66  
omitted Genes: Vmn2r68, Vmn2r72, Vmn2r73  
omitted Genes: Vmn2r74, Vmn2r76, Olfr309  
omitted Genes: Olfr308, Olfr307, Olfr305  
omitted Genes: Olfr303, Olfr301, Olfr298  
omitted Genes: Olfr297, Olfr295, Olfr294  
omitted Genes: Olfr293, Olfr292, Folh1  
omitted Genes: Vmn2r77, Vmn2r78, Vmn2r79  
omitted Genes: Me3, Ccdc81, I7Rn6  
omitted Genes: E230029C05Rik, 2310010J17Rik, Ccdc83  
omitted Genes: Crebzf, Tmem126a, Tmem126b



## Fine-mapping Regions

| snp           | chr | pos (Mb) | pp           | group        | color  |
|---------------|-----|----------|--------------|--------------|--------|
| chr7:84119855 | 7   | 84.11986 | 0.0005778993 | Credible Set | purple |
| chr7:84124190 | 7   | 84.12419 | 0.0005357889 | Credible Set | purple |
| chr7:84124515 | 7   | 84.12452 | 0.0005171650 | Credible Set | purple |
| chr7:84175856 | 7   | 84.17586 | 0.0004909846 | Credible Set | purple |
| chr7:84176482 | 7   | 84.17648 | 0.0005027755 | Credible Set | purple |
| chr7:84250985 | 7   | 84.25099 | 0.0037721754 | Credible Set | purple |
| chr7:84251011 | 7   | 84.25101 | 0.0042096789 | Credible Set | purple |
| chr7:84251159 | 7   | 84.25116 | 0.0029634419 | Credible Set | purple |
| chr7:84251209 | 7   | 84.25121 | 0.0029575140 | Credible Set | purple |
| chr7:84265410 | 7   | 84.26541 | 0.0038360642 | Credible Set | purple |
| chr7:84265685 | 7   | 84.26569 | 0.0073011626 | Credible Set | purple |
| chr7:84291540 | 7   | 84.29154 | 0.0065812100 | Credible Set | purple |
| chr7:84327288 | 7   | 84.32729 | 0.0070070876 | Credible Set | purple |
| chr7:84327808 | 7   | 84.32781 | 0.0070022368 | Credible Set | purple |
| chr7:84327850 | 7   | 84.32785 | 0.0071765186 | Credible Set | purple |
| chr7:84338595 | 7   | 84.33859 | 0.0074734726 | Credible Set | purple |
| chr7:84343118 | 7   | 84.34312 | 0.0072591545 | Credible Set | purple |
| chr7:84344805 | 7   | 84.34480 | 0.0079722874 | Credible Set | purple |
| chr7:84347423 | 7   | 84.34742 | 0.0077553426 | Credible Set | purple |
| chr7:84360038 | 7   | 84.36004 | 0.0075790774 | Credible Set | purple |
| chr7:84360224 | 7   | 84.36022 | 0.0209963132 | Credible Set | purple |
| chr7:84360247 | 7   | 84.36025 | 0.0206930607 | Credible Set | purple |
| chr7:84360258 | 7   | 84.36026 | 0.0211543126 | Credible Set | purple |
| chr7:84360279 | 7   | 84.36028 | 0.0205208054 | Credible Set | purple |
| chr7:84360626 | 7   | 84.36063 | 0.0067942350 | Credible Set | purple |
| chr7:84360642 | 7   | 84.36064 | 0.0067436055 | Credible Set | purple |
| chr7:84360703 | 7   | 84.36070 | 0.0190356718 | Credible Set | purple |
| chr7:84360714 | 7   | 84.36071 | 0.0194835692 | Credible Set | purple |
| chr7:84360716 | 7   | 84.36072 | 0.0194835692 | Credible Set | purple |
| chr7:84375526 | 7   | 84.37553 | 0.0105168391 | Credible Set | purple |
| chr7:84375577 | 7   | 84.37558 | 0.0065432131 | Credible Set | purple |
| chr7:84375642 | 7   | 84.37564 | 0.0065252941 | Credible Set | purple |
| chr7:84397575 | 7   | 84.39758 | 0.0143639053 | Credible Set | purple |
| chr7:84397597 | 7   | 84.39760 | 0.0143942156 | Credible Set | purple |
| chr7:84430102 | 7   | 84.43010 | 0.0081738215 | Credible Set | purple |
| chr7:84501082 | 7   | 84.50108 | 0.0093843197 | Credible Set | purple |

## Fine-mapping Regions

| snp           | chr | pos (Mb) | pp           | group        | color  |
|---------------|-----|----------|--------------|--------------|--------|
| chr7:84514082 | 7   | 84.51408 | 0.0201037678 | Credible Set | purple |
| chr7:84514444 | 7   | 84.51444 | 0.0188191681 | Credible Set | purple |
| chr7:84514505 | 7   | 84.51450 | 0.0180192757 | Credible Set | purple |
| chr7:84514564 | 7   | 84.51456 | 0.0268849195 | Credible Set | purple |
| chr7:84514575 | 7   | 84.51457 | 0.0249583567 | Credible Set | purple |
| chr7:84514734 | 7   | 84.51473 | 0.0211992357 | Credible Set | purple |
| chr7:84543346 | 7   | 84.54335 | 0.0196454568 | Credible Set | purple |
| chr7:84543355 | 7   | 84.54336 | 0.0195611893 | Credible Set | purple |
| chr7:84543782 | 7   | 84.54378 | 0.0284006070 | Credible Set | purple |
| chr7:84619632 | 7   | 84.61963 | 0.0265908744 | Credible Set | purple |
| chr7:84636759 | 7   | 84.63676 | 0.0207510453 | Credible Set | purple |
| chr7:84653095 | 7   | 84.65309 | 0.0203711319 | Credible Set | purple |
| chr7:84653660 | 7   | 84.65366 | 0.0006114912 | Credible Set | purple |
| chr7:84653702 | 7   | 84.65370 | 0.0005916057 | Credible Set | purple |
| chr7:84653707 | 7   | 84.65371 | 0.0006163577 | Credible Set | purple |
| chr7:84733186 | 7   | 84.73319 | 0.0202879621 | Credible Set | purple |
| chr7:85533207 | 7   | 85.53321 | 0.0118245423 | Credible Set | purple |
| chr7:85543843 | 7   | 85.54384 | 0.0117809342 | Credible Set | purple |
| chr7:85656243 | 7   | 85.65624 | 0.0053322504 | Credible Set | purple |
| chr7:85677494 | 7   | 85.67749 | 0.0124047503 | Credible Set | purple |
| chr7:85712663 | 7   | 85.71266 | 0.0115982331 | Credible Set | purple |
| chr7:85712975 | 7   | 85.71298 | 0.0112675652 | Credible Set | purple |
| chr7:85840665 | 7   | 85.84067 | 0.0117591812 | Credible Set | purple |
| chr7:86053386 | 7   | 86.05339 | 0.0105606946 | Credible Set | purple |
| chr7:86237374 | 7   | 86.23737 | 0.0093901368 | Credible Set | purple |
| chr7:86298979 | 7   | 86.29898 | 0.0086891344 | Credible Set | purple |
| chr7:86344420 | 7   | 86.34442 | 0.0082223415 | Credible Set | purple |
| chr7:86344437 | 7   | 86.34444 | 0.0081311776 | Credible Set | purple |
| chr7:86344488 | 7   | 86.34449 | 0.0086472449 | Credible Set | purple |
| chr7:86582139 | 7   | 86.58214 | 0.0075978445 | Credible Set | purple |
| chr7:86603770 | 7   | 86.60377 | 0.0074308701 | Credible Set | purple |
| chr7:86645719 | 7   | 86.64572 | 0.0033481407 | Credible Set | purple |
| chr7:86645792 | 7   | 86.64579 | 0.0033366141 | Credible Set | purple |
| chr7:86645947 | 7   | 86.64595 | 0.0009731313 | Credible Set | purple |
| chr7:86645990 | 7   | 86.64599 | 0.0010036619 | Credible Set | purple |
| chr7:86668998 | 7   | 86.66900 | 0.0076263605 | Credible Set | purple |

## Fine-mapping Regions

| snp           | chr | pos (Mb) | pp           | group        | color  |
|---------------|-----|----------|--------------|--------------|--------|
| chr7:86685426 | 7   | 86.68543 | 0.0073526957 | Credible Set | purple |
| chr7:86685507 | 7   | 86.68551 | 0.0073576016 | Credible Set | purple |
| chr7:86685648 | 7   | 86.68565 | 0.0076124420 | Credible Set | purple |
| chr7:86692214 | 7   | 86.69221 | 0.0077154897 | Credible Set | purple |
| chr7:86692491 | 7   | 86.69249 | 0.0078837695 | Credible Set | purple |
| chr7:86725518 | 7   | 86.72552 | 0.0079804769 | Credible Set | purple |
| chr7:86916161 | 7   | 86.91616 | 0.0045834015 | Credible Set | purple |
| chr7:86934710 | 7   | 86.93471 | 0.0048625197 | Credible Set | purple |
| chr7:87246786 | 7   | 87.24679 | 0.0261587611 | Credible Set | purple |
| chr7:87254690 | 7   | 87.25469 | 0.0191106937 | Credible Set | purple |
| chr7:87255156 | 7   | 87.25516 | 0.0315032437 | Credible Set | purple |
| chr7:87389952 | 7   | 87.38995 | 0.0216541466 | Credible Set | purple |
| chr7:87389989 | 7   | 87.38999 | 0.0118605169 | Credible Set | purple |
| chr7:87390014 | 7   | 87.39001 | 0.0120263294 | Credible Set | purple |
| chr7:87554961 | 7   | 87.55496 | 0.0163924310 | Credible Set | purple |
| chr7:87567685 | 7   | 87.56768 | 0.0045458375 | Credible Set | purple |
| chr7:87567686 | 7   | 87.56769 | 0.0045284478 | Credible Set | purple |
| chr7:87642045 | 7   | 87.64204 | 0.0098629187 | Credible Set | purple |
| chr7:87665727 | 7   | 87.66573 | 0.0076458768 | Credible Set | purple |
| chr7:87866323 | 7   | 87.86632 | 0.0015433559 | Credible Set | purple |
| chr7:88167216 | 7   | 88.16722 | 0.0006286716 | Credible Set | purple |
| chr7:88888200 | 7   | 88.88820 | 0.0006690654 | Credible Set | purple |

F39–43 GBS, open field, distance moved in total in 2nd 5 minutes (cm)

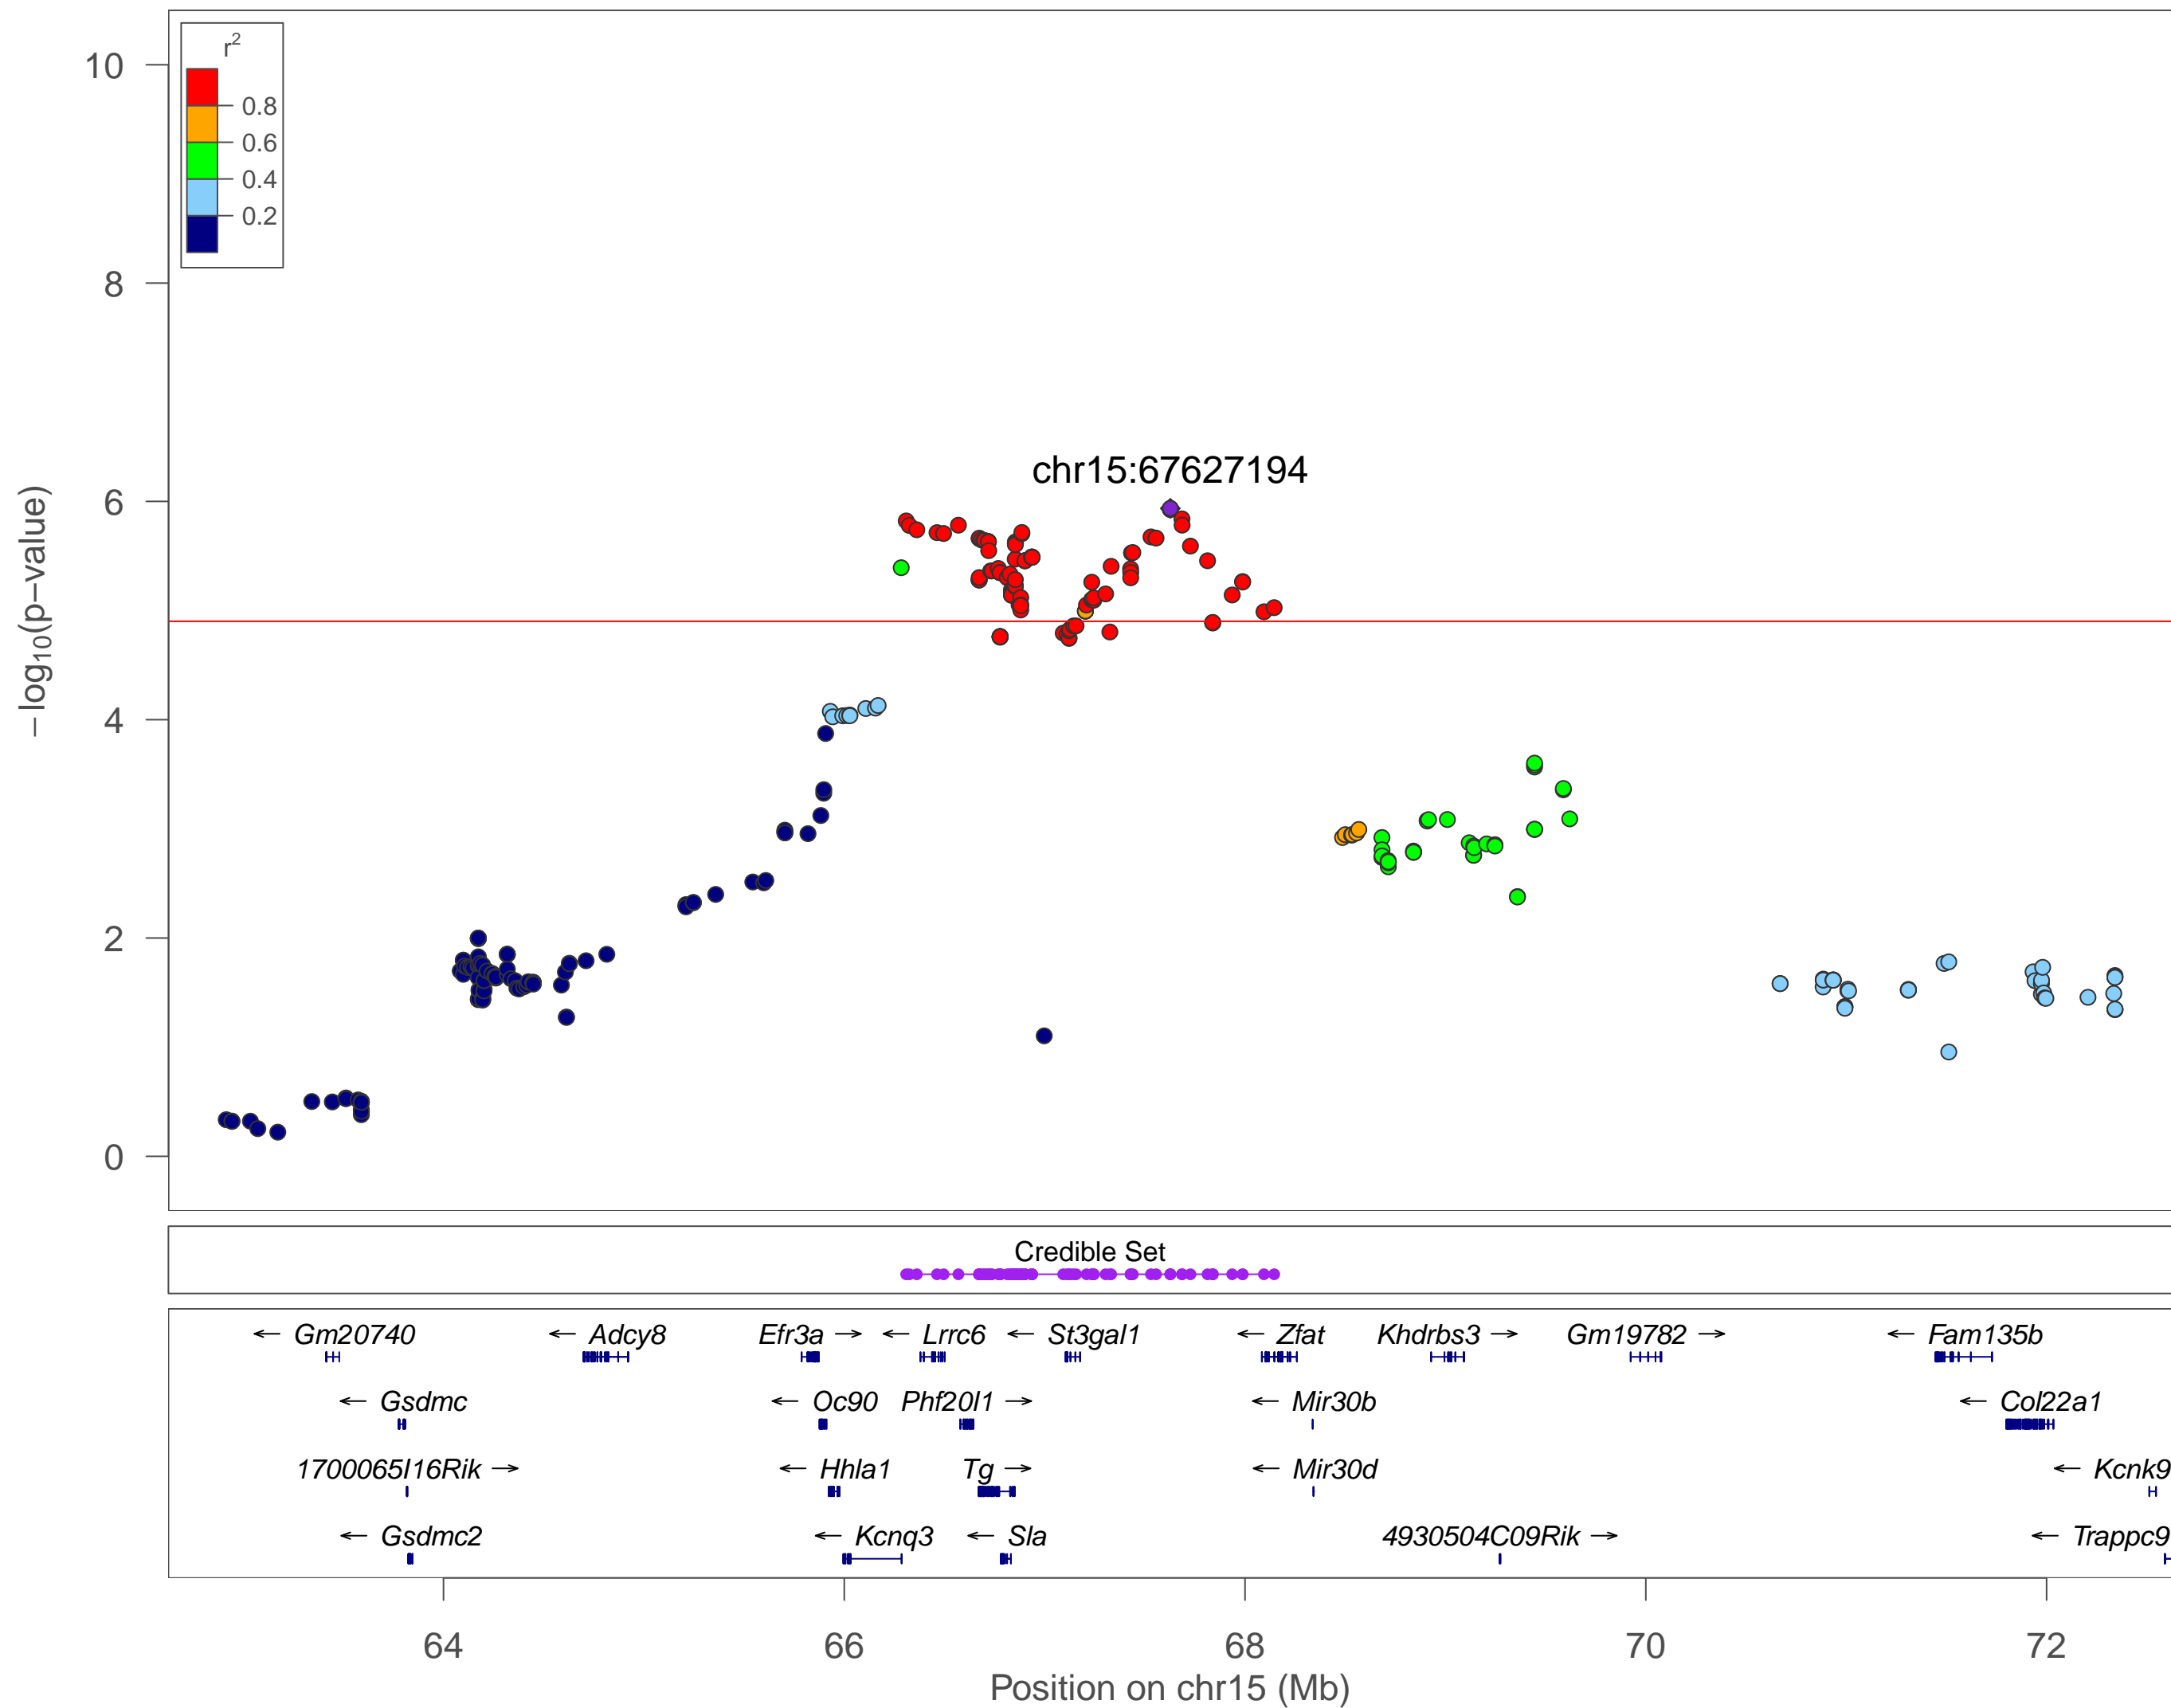

date: Thu Oct 25 17:25:06 2018

build: F3943GBS

display range: chr15:62627194–72627194 [62627194–72627194]

hilite range: 0 – 0 [ 0 – 0 ]

reference SNP: chr15:67627194

number of SNPs plotted: 313

min P-value: 1.16E–6 [chr15:67627194]

max P-value: 6.01E–1 [chr15:63173066]

omitted Genes: Gsdmcl1, Gsdmc3, Gsdmcl2

omitted Genes: Gsdmc4, Gsdmcl-ps, Fam49b

omitted Genes: Asap1, Tmem71, Wisp1

omitted Genes: Ndr1, 1700012I11Rik

## Fine-mapping Regions

| snp            | chr | pos (Mb) | pp          | group        | color  |
|----------------|-----|----------|-------------|--------------|--------|
| chr15:66309070 | 15  | 66.30907 | 0.023207097 | Credible Set | purple |
| chr15:66324506 | 15  | 66.32451 | 0.021174756 | Credible Set | purple |
| chr15:66361813 | 15  | 66.36181 | 0.019390850 | Credible Set | purple |
| chr15:66462727 | 15  | 66.46273 | 0.018298992 | Credible Set | purple |
| chr15:66495529 | 15  | 66.49553 | 0.017979664 | Credible Set | purple |
| chr15:66569471 | 15  | 66.56947 | 0.021277214 | Credible Set | purple |
| chr15:66672984 | 15  | 66.67298 | 0.007050229 | Credible Set | purple |
| chr15:66672997 | 15  | 66.67300 | 0.007027169 | Credible Set | purple |
| chr15:66673010 | 15  | 66.67301 | 0.007009014 | Credible Set | purple |
| chr15:66673015 | 15  | 66.67302 | 0.007370279 | Credible Set | purple |
| chr15:66673436 | 15  | 66.67344 | 0.016272011 | Credible Set | purple |
| chr15:66673541 | 15  | 66.67354 | 0.016297356 | Credible Set | purple |
| chr15:66673940 | 15  | 66.67394 | 0.016276737 | Credible Set | purple |
| chr15:66685097 | 15  | 66.68510 | 0.015778110 | Credible Set | purple |
| chr15:66696518 | 15  | 66.69652 | 0.015588218 | Credible Set | purple |
| chr15:66699723 | 15  | 66.69972 | 0.015597573 | Credible Set | purple |
| chr15:66719126 | 15  | 66.71913 | 0.015330466 | Credible Set | purple |
| chr15:66719241 | 15  | 66.71924 | 0.015171761 | Credible Set | purple |
| chr15:66720772 | 15  | 66.72077 | 0.012702722 | Credible Set | purple |
| chr15:66730424 | 15  | 66.73042 | 0.008425202 | Credible Set | purple |
| chr15:66737376 | 15  | 66.73738 | 0.008431567 | Credible Set | purple |
| chr15:66768701 | 15  | 66.76870 | 0.008860071 | Credible Set | purple |
| chr15:66777400 | 15  | 66.77740 | 0.008145108 | Credible Set | purple |
| chr15:66777425 | 15  | 66.77742 | 0.008157646 | Credible Set | purple |
| chr15:66777461 | 15  | 66.77746 | 0.008131774 | Credible Set | purple |
| chr15:66777729 | 15  | 66.77773 | 0.002249629 | Credible Set | purple |
| chr15:66777730 | 15  | 66.77773 | 0.002246403 | Credible Set | purple |
| chr15:66777731 | 15  | 66.77773 | 0.002240508 | Credible Set | purple |
| chr15:66777743 | 15  | 66.77774 | 0.002235736 | Credible Set | purple |
| chr15:66812941 | 15  | 66.81294 | 0.007358563 | Credible Set | purple |
| chr15:66826934 | 15  | 66.82693 | 0.007915947 | Credible Set | purple |
| chr15:66834506 | 15  | 66.83451 | 0.005517590 | Credible Set | purple |
| chr15:66834532 | 15  | 66.83453 | 0.005630602 | Credible Set | purple |
| chr15:66834574 | 15  | 66.83457 | 0.005616528 | Credible Set | purple |
| chr15:66834575 | 15  | 66.83458 | 0.005757617 | Credible Set | purple |
| chr15:66834600 | 15  | 66.83460 | 0.005204227 | Credible Set | purple |

## Fine-mapping Regions

| snp            | chr | pos (Mb) | pp          | group        | color  |
|----------------|-----|----------|-------------|--------------|--------|
| chr15:66834621 | 15  | 66.83462 | 0.005392772 | Credible Set | purple |
| chr15:66834624 | 15  | 66.83462 | 0.005160620 | Credible Set | purple |
| chr15:66834637 | 15  | 66.83464 | 0.005175929 | Credible Set | purple |
| chr15:66853166 | 15  | 66.85317 | 0.010694344 | Credible Set | purple |
| chr15:66853439 | 15  | 66.85344 | 0.006159641 | Credible Set | purple |
| chr15:66853460 | 15  | 66.85346 | 0.006206085 | Credible Set | purple |
| chr15:66853489 | 15  | 66.85349 | 0.006225632 | Credible Set | purple |
| chr15:66853520 | 15  | 66.85352 | 0.007075779 | Credible Set | purple |
| chr15:66853893 | 15  | 66.85389 | 0.015165548 | Credible Set | purple |
| chr15:66853894 | 15  | 66.85389 | 0.014682533 | Credible Set | purple |
| chr15:66853923 | 15  | 66.85392 | 0.014734403 | Credible Set | purple |
| chr15:66853954 | 15  | 66.85395 | 0.014358853 | Credible Set | purple |
| chr15:66872519 | 15  | 66.87252 | 0.004252856 | Credible Set | purple |
| chr15:66880575 | 15  | 66.88057 | 0.003831402 | Credible Set | purple |
| chr15:66880583 | 15  | 66.88058 | 0.004922123 | Credible Set | purple |
| chr15:66880635 | 15  | 66.88063 | 0.004245451 | Credible Set | purple |
| chr15:66880638 | 15  | 66.88064 | 0.004176892 | Credible Set | purple |
| chr15:66886219 | 15  | 66.88622 | 0.017924386 | Credible Set | purple |
| chr15:66886266 | 15  | 66.88627 | 0.018358923 | Credible Set | purple |
| chr15:66901528 | 15  | 66.90153 | 0.010354701 | Credible Set | purple |
| chr15:66901548 | 15  | 66.90155 | 0.010354701 | Credible Set | purple |
| chr15:66901593 | 15  | 66.90159 | 0.010354701 | Credible Set | purple |
| chr15:66935376 | 15  | 66.93538 | 0.011140589 | Credible Set | purple |
| chr15:66935390 | 15  | 66.93539 | 0.011140589 | Credible Set | purple |
| chr15:66935391 | 15  | 66.93539 | 0.011140589 | Credible Set | purple |
| chr15:66935405 | 15  | 66.93541 | 0.011140589 | Credible Set | purple |
| chr15:66937231 | 15  | 66.93723 | 0.011182417 | Credible Set | purple |
| chr15:66937423 | 15  | 66.93742 | 0.011091471 | Credible Set | purple |
| chr15:67092666 | 15  | 67.09267 | 0.002405816 | Credible Set | purple |
| chr15:67111279 | 15  | 67.11128 | 0.002343101 | Credible Set | purple |
| chr15:67121756 | 15  | 67.12176 | 0.002523667 | Credible Set | purple |
| chr15:67126159 | 15  | 67.12616 | 0.002601266 | Credible Set | purple |
| chr15:67144054 | 15  | 67.14405 | 0.002779978 | Credible Set | purple |
| chr15:67156480 | 15  | 67.15648 | 0.002781250 | Credible Set | purple |
| chr15:67208761 | 15  | 67.20876 | 0.004234644 | Credible Set | purple |
| chr15:67234910 | 15  | 67.23491 | 0.004728429 | Credible Set | purple |

## Fine-mapping Regions

| snp            | chr | pos (Mb) | pp          | group        | color  |
|----------------|-----|----------|-------------|--------------|--------|
| chr15:67235072 | 15  | 67.23507 | 0.006718163 | Credible Set | purple |
| chr15:67245093 | 15  | 67.24509 | 0.004663734 | Credible Set | purple |
| chr15:67245123 | 15  | 67.24512 | 0.004892108 | Credible Set | purple |
| chr15:67304194 | 15  | 67.30419 | 0.005299837 | Credible Set | purple |
| chr15:67325463 | 15  | 67.32546 | 0.002461294 | Credible Set | purple |
| chr15:67331738 | 15  | 67.33174 | 0.009255784 | Credible Set | purple |
| chr15:67428857 | 15  | 67.42886 | 0.008783811 | Credible Set | purple |
| chr15:67429407 | 15  | 67.42941 | 0.008171220 | Credible Set | purple |
| chr15:67429420 | 15  | 67.42942 | 0.007334340 | Credible Set | purple |
| chr15:67433395 | 15  | 67.43340 | 0.012121725 | Credible Set | purple |
| chr15:67439974 | 15  | 67.43997 | 0.012223057 | Credible Set | purple |
| chr15:67530570 | 15  | 67.53057 | 0.016779644 | Credible Set | purple |
| chr15:67555683 | 15  | 67.55568 | 0.016388221 | Credible Set | purple |
| chr15:67627161 | 15  | 67.62716 | 0.029220941 | Credible Set | purple |
| chr15:67627183 | 15  | 67.62718 | 0.029871455 | Credible Set | purple |
| chr15:67627194 | 15  | 67.62719 | 0.029916701 | Credible Set | purple |
| chr15:67685224 | 15  | 67.68522 | 0.024198847 | Credible Set | purple |
| chr15:67685781 | 15  | 67.68578 | 0.021301057 | Credible Set | purple |
| chr15:67727448 | 15  | 67.72745 | 0.013939461 | Credible Set | purple |
| chr15:67812971 | 15  | 67.81297 | 0.010354803 | Credible Set | purple |
| chr15:67838708 | 15  | 67.83871 | 0.002956534 | Credible Set | purple |
| chr15:67838720 | 15  | 67.83872 | 0.002959211 | Credible Set | purple |
| chr15:67838721 | 15  | 67.83872 | 0.002986615 | Credible Set | purple |
| chr15:67935812 | 15  | 67.93581 | 0.005186890 | Credible Set | purple |
| chr15:67987913 | 15  | 67.98791 | 0.006800399 | Credible Set | purple |
| chr15:67987932 | 15  | 67.98793 | 0.006735037 | Credible Set | purple |
| chr15:68094377 | 15  | 68.09438 | 0.003697219 | Credible Set | purple |
| chr15:68145325 | 15  | 68.14532 | 0.004017346 | Credible Set | purple |



F39–43 GBS, open field, zone transition frequency in 2nd 5 minutes

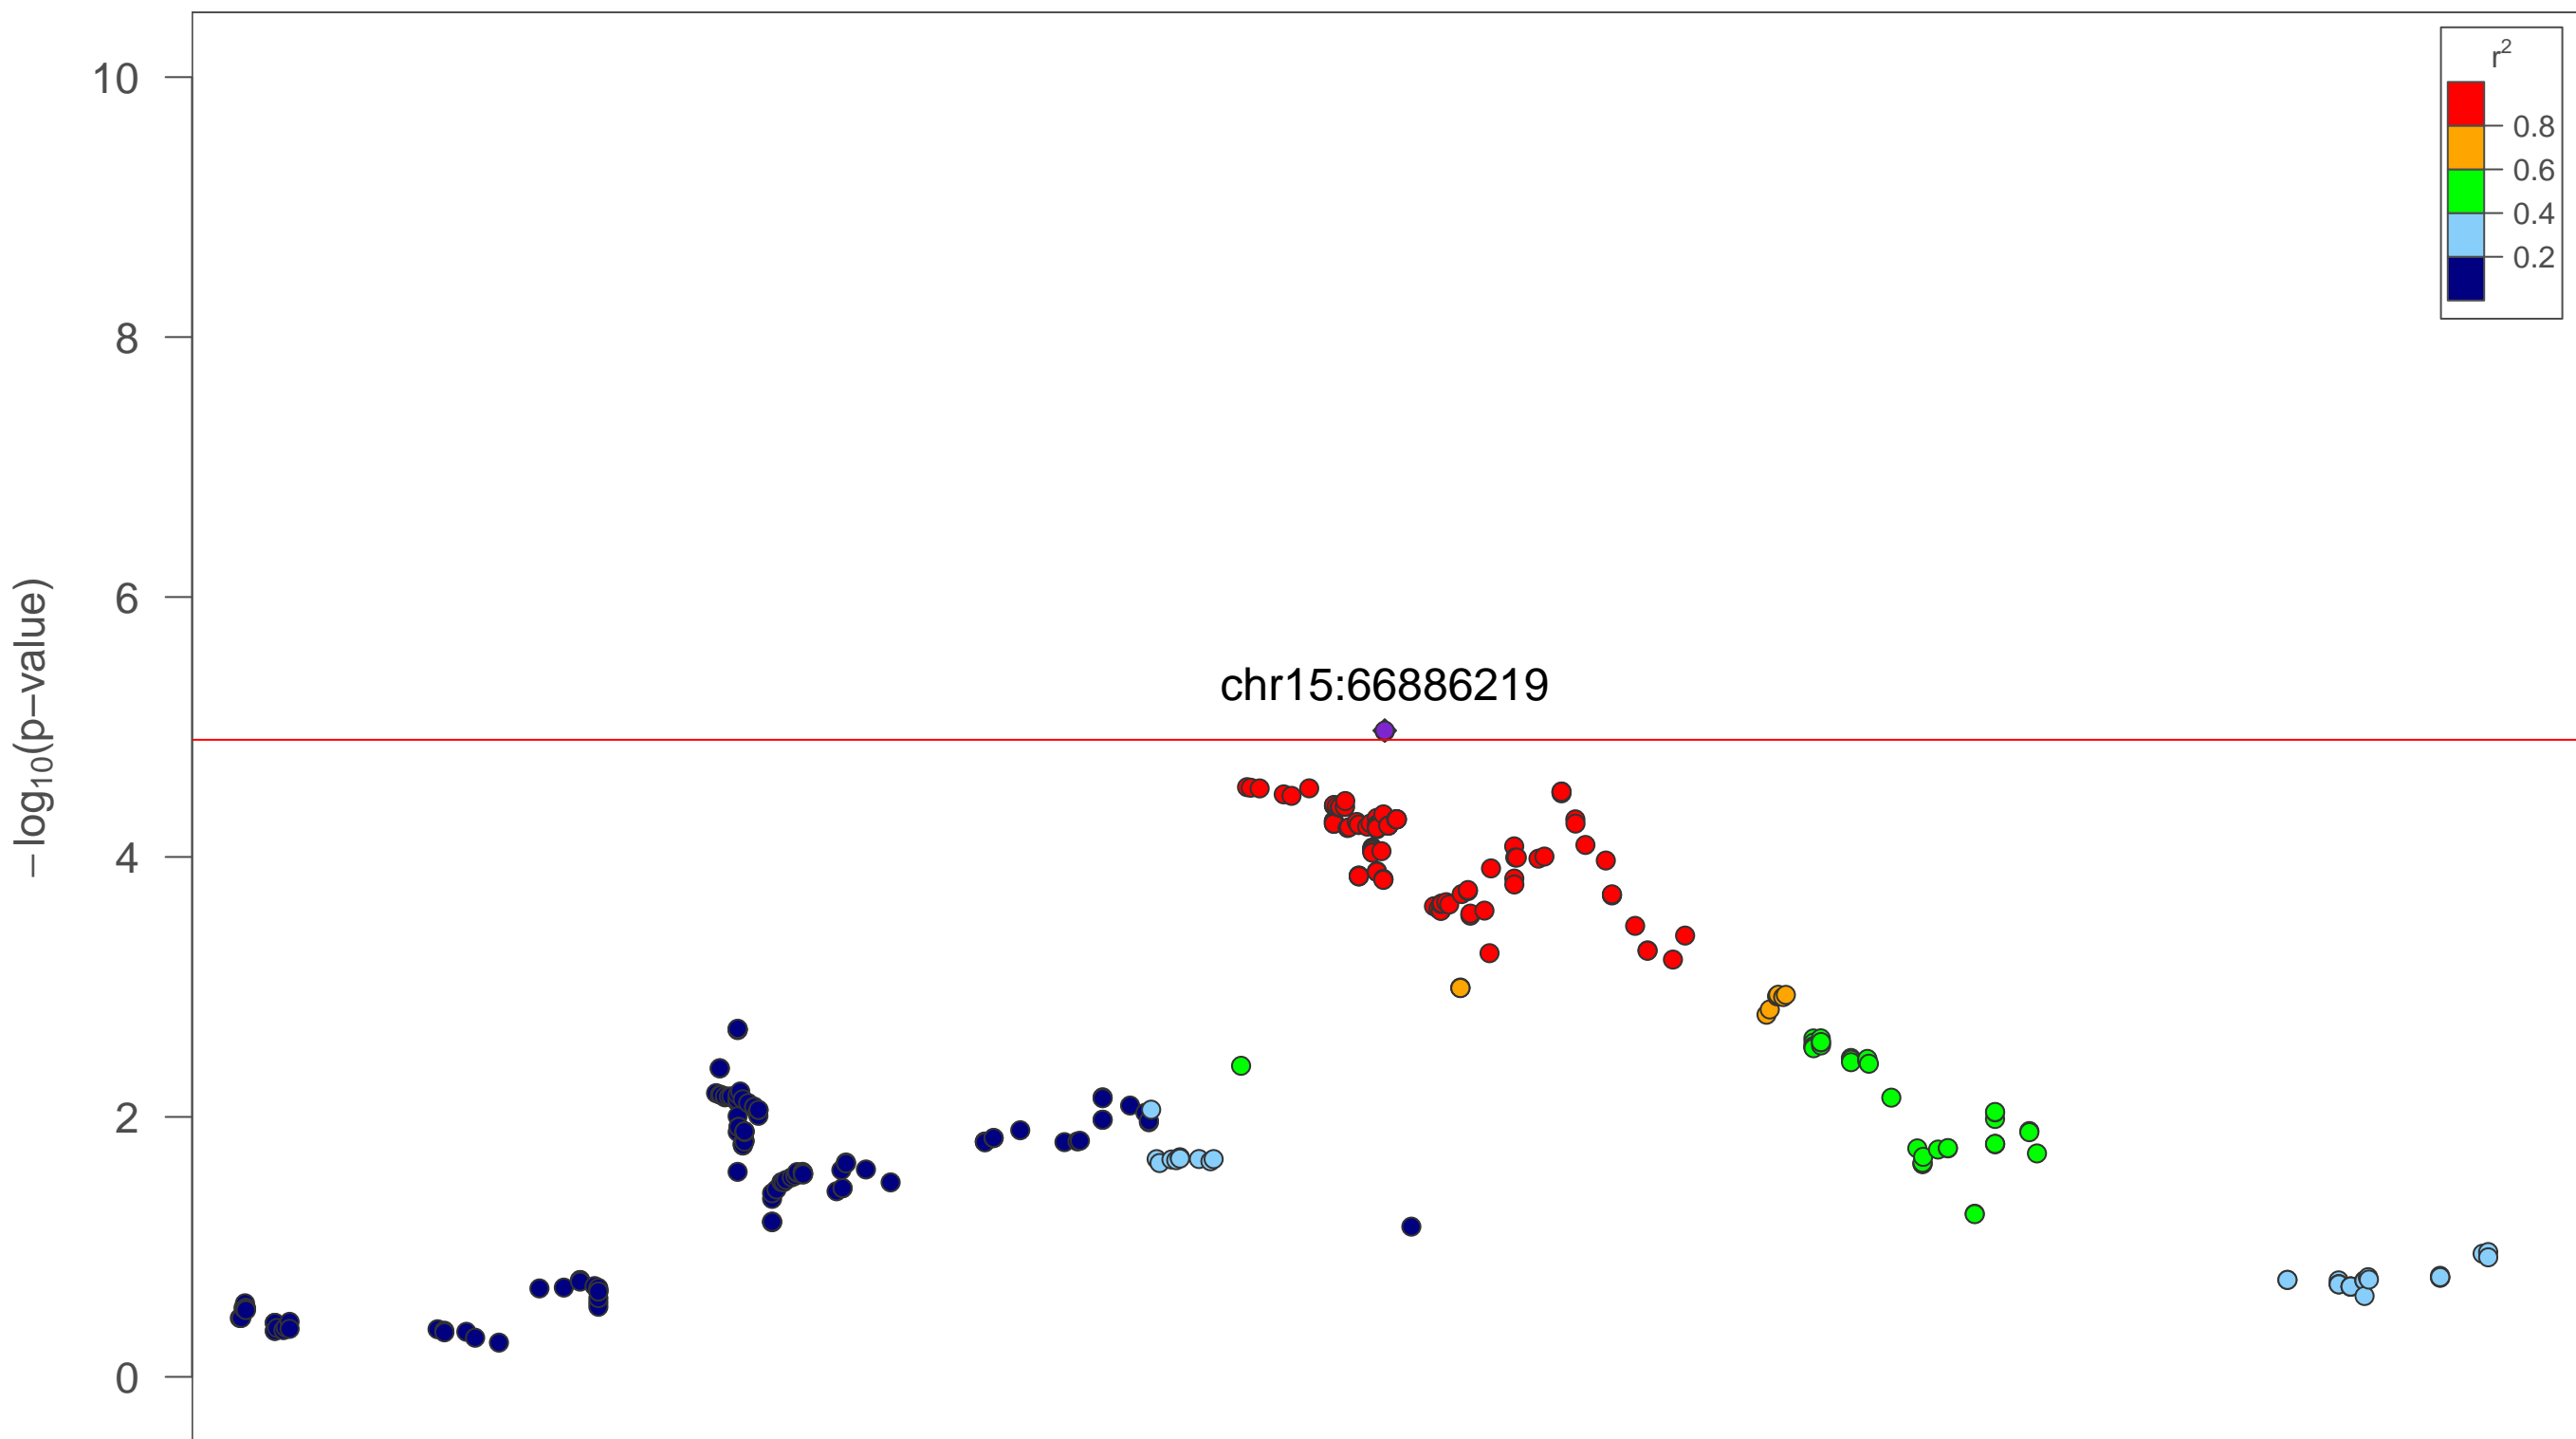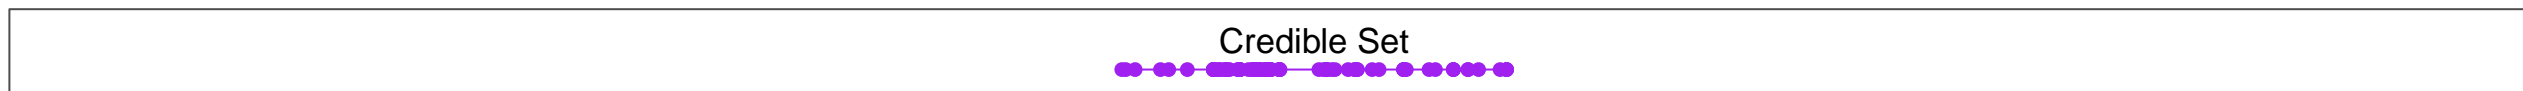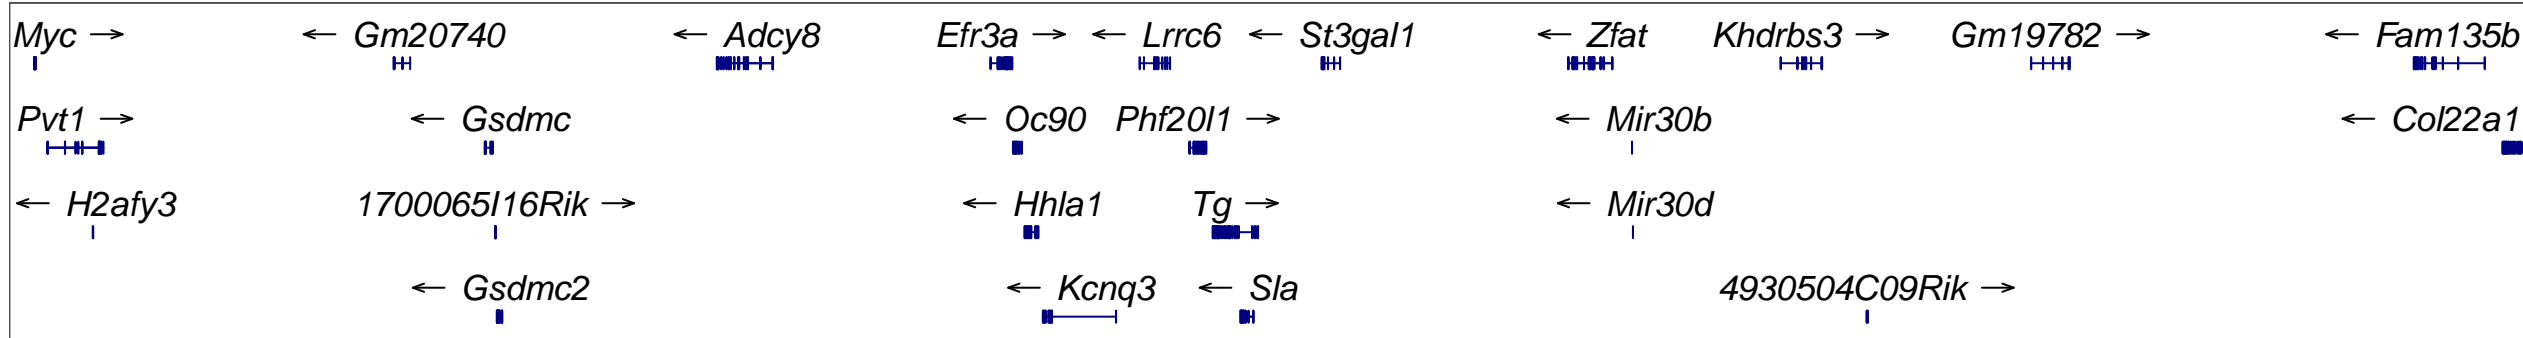

11 genes  
omitted

62 64 66 68 70

Position on chr15 (Mb)

date: Thu Oct 25 17:25:25 2018

build: F3943GBS

display range: chr15:61886219–71886219 [61886219–71886219]

hilite range: 0 – 0 [ 0 – 0 ]

reference SNP: chr15:66886219

number of SNPs plotted: 313

min P-value: 1.07E–5 [chr15:66886219]

max P-value: 5.45E–1 [chr15:63173066]

omitted Genes: Gsdmcl1, Gsdmc3, Gsdmcl2

omitted Genes: Gsdmc4, Gsdmcl-ps, Fam49b

omitted Genes: Asap1, Tmem71, Wisp1

omitted Genes: Ndr1, 1700012I11Rik

## Fine-mapping Regions

| snp            | chr | pos (Mb) | pp          | group        | color  |
|----------------|-----|----------|-------------|--------------|--------|
| chr15:66309070 | 15  | 66.30907 | 0.020698958 | Credible Set | purple |
| chr15:66324506 | 15  | 66.32451 | 0.020509886 | Credible Set | purple |
| chr15:66361813 | 15  | 66.36181 | 0.020262884 | Credible Set | purple |
| chr15:66462727 | 15  | 66.46273 | 0.018331792 | Credible Set | purple |
| chr15:66495529 | 15  | 66.49553 | 0.017879978 | Credible Set | purple |
| chr15:66569471 | 15  | 66.56947 | 0.020294586 | Credible Set | purple |
| chr15:66672984 | 15  | 66.67298 | 0.011738641 | Credible Set | purple |
| chr15:66672997 | 15  | 66.67300 | 0.011658753 | Credible Set | purple |
| chr15:66673010 | 15  | 66.67301 | 0.011164878 | Credible Set | purple |
| chr15:66673015 | 15  | 66.67302 | 0.011209706 | Credible Set | purple |
| chr15:66673436 | 15  | 66.67344 | 0.015080409 | Credible Set | purple |
| chr15:66673541 | 15  | 66.67354 | 0.015274113 | Credible Set | purple |
| chr15:66673940 | 15  | 66.67394 | 0.015339929 | Credible Set | purple |
| chr15:66685097 | 15  | 66.68510 | 0.014987047 | Credible Set | purple |
| chr15:66696518 | 15  | 66.69652 | 0.014666886 | Credible Set | purple |
| chr15:66699723 | 15  | 66.69972 | 0.014803203 | Credible Set | purple |
| chr15:66719126 | 15  | 66.71913 | 0.014855476 | Credible Set | purple |
| chr15:66719241 | 15  | 66.71924 | 0.014872116 | Credible Set | purple |
| chr15:66720772 | 15  | 66.72077 | 0.016394163 | Credible Set | purple |
| chr15:66730424 | 15  | 66.73042 | 0.010415374 | Credible Set | purple |
| chr15:66737376 | 15  | 66.73738 | 0.010561024 | Credible Set | purple |
| chr15:66768701 | 15  | 66.76870 | 0.011528918 | Credible Set | purple |
| chr15:66777400 | 15  | 66.77740 | 0.010959676 | Credible Set | purple |
| chr15:66777425 | 15  | 66.77742 | 0.010990736 | Credible Set | purple |
| chr15:66777461 | 15  | 66.77746 | 0.011029969 | Credible Set | purple |
| chr15:66777706 | 15  | 66.77771 | 0.004662397 | Credible Set | purple |
| chr15:66777728 | 15  | 66.77773 | 0.004625887 | Credible Set | purple |
| chr15:66777729 | 15  | 66.77773 | 0.004709199 | Credible Set | purple |
| chr15:66777730 | 15  | 66.77773 | 0.004664560 | Credible Set | purple |
| chr15:66777731 | 15  | 66.77773 | 0.004679039 | Credible Set | purple |
| chr15:66777743 | 15  | 66.77774 | 0.004653623 | Credible Set | purple |
| chr15:66812941 | 15  | 66.81294 | 0.010659136 | Credible Set | purple |
| chr15:66826934 | 15  | 66.82693 | 0.011255160 | Credible Set | purple |
| chr15:66834506 | 15  | 66.83451 | 0.007469981 | Credible Set | purple |
| chr15:66834532 | 15  | 66.83453 | 0.007511882 | Credible Set | purple |
| chr15:66834574 | 15  | 66.83457 | 0.007328150 | Credible Set | purple |

## Fine-mapping Regions

| snp            | chr | pos (Mb) | pp          | group        | color  |
|----------------|-----|----------|-------------|--------------|--------|
| chr15:66834575 | 15  | 66.83458 | 0.007408892 | Credible Set | purple |
| chr15:66834600 | 15  | 66.83460 | 0.006935110 | Credible Set | purple |
| chr15:66834621 | 15  | 66.83462 | 0.007236619 | Credible Set | purple |
| chr15:66834624 | 15  | 66.83462 | 0.006981609 | Credible Set | purple |
| chr15:66834637 | 15  | 66.83464 | 0.006883963 | Credible Set | purple |
| chr15:66853166 | 15  | 66.85317 | 0.012349756 | Credible Set | purple |
| chr15:66853439 | 15  | 66.85344 | 0.004997227 | Credible Set | purple |
| chr15:66853460 | 15  | 66.85346 | 0.005061523 | Credible Set | purple |
| chr15:66853489 | 15  | 66.85349 | 0.005000614 | Credible Set | purple |
| chr15:66853520 | 15  | 66.85352 | 0.010203847 | Credible Set | purple |
| chr15:66853893 | 15  | 66.85389 | 0.011028860 | Credible Set | purple |
| chr15:66853894 | 15  | 66.85389 | 0.010888260 | Credible Set | purple |
| chr15:66853923 | 15  | 66.85392 | 0.010743687 | Credible Set | purple |
| chr15:66853954 | 15  | 66.85395 | 0.010387656 | Credible Set | purple |
| chr15:66872519 | 15  | 66.87252 | 0.007063003 | Credible Set | purple |
| chr15:66880575 | 15  | 66.88057 | 0.004445166 | Credible Set | purple |
| chr15:66880583 | 15  | 66.88058 | 0.013105398 | Credible Set | purple |
| chr15:66880635 | 15  | 66.88063 | 0.004416464 | Credible Set | purple |
| chr15:66880638 | 15  | 66.88064 | 0.004371283 | Credible Set | purple |
| chr15:66886219 | 15  | 66.88622 | 0.053782866 | Credible Set | purple |
| chr15:66886266 | 15  | 66.88627 | 0.052999560 | Credible Set | purple |
| chr15:66901528 | 15  | 66.90153 | 0.010841851 | Credible Set | purple |
| chr15:66901548 | 15  | 66.90155 | 0.010841851 | Credible Set | purple |
| chr15:66901593 | 15  | 66.90159 | 0.010841851 | Credible Set | purple |
| chr15:66935376 | 15  | 66.93538 | 0.012062147 | Credible Set | purple |
| chr15:66935390 | 15  | 66.93539 | 0.012062147 | Credible Set | purple |
| chr15:66935391 | 15  | 66.93539 | 0.012062147 | Credible Set | purple |
| chr15:66935405 | 15  | 66.93541 | 0.012062147 | Credible Set | purple |
| chr15:66937231 | 15  | 66.93723 | 0.012036848 | Credible Set | purple |
| chr15:66937423 | 15  | 66.93742 | 0.012043692 | Credible Set | purple |
| chr15:67092666 | 15  | 67.09267 | 0.002820092 | Credible Set | purple |
| chr15:67111279 | 15  | 67.11128 | 0.002696999 | Credible Set | purple |
| chr15:67121570 | 15  | 67.12157 | 0.002621619 | Credible Set | purple |
| chr15:67121571 | 15  | 67.12157 | 0.002611509 | Credible Set | purple |
| chr15:67121756 | 15  | 67.12176 | 0.002930503 | Credible Set | purple |
| chr15:67126159 | 15  | 67.12616 | 0.002958378 | Credible Set | purple |

## Fine-mapping Regions

| snp            | chr | pos (Mb) | pp          | group        | color  |
|----------------|-----|----------|-------------|--------------|--------|
| chr15:67144054 | 15  | 67.14405 | 0.003016865 | Credible Set | purple |
| chr15:67156480 | 15  | 67.15648 | 0.002902829 | Credible Set | purple |
| chr15:67208761 | 15  | 67.20876 | 0.003452345 | Credible Set | purple |
| chr15:67234910 | 15  | 67.23491 | 0.003626787 | Credible Set | purple |
| chr15:67235072 | 15  | 67.23507 | 0.003693117 | Credible Set | purple |
| chr15:67245093 | 15  | 67.24509 | 0.002409990 | Credible Set | purple |
| chr15:67245123 | 15  | 67.24512 | 0.002495326 | Credible Set | purple |
| chr15:67304194 | 15  | 67.30419 | 0.002621891 | Credible Set | purple |
| chr15:67331738 | 15  | 67.33174 | 0.005297626 | Credible Set | purple |
| chr15:67428857 | 15  | 67.42886 | 0.007662751 | Credible Set | purple |
| chr15:67429407 | 15  | 67.42941 | 0.004473028 | Credible Set | purple |
| chr15:67429420 | 15  | 67.42942 | 0.004049878 | Credible Set | purple |
| chr15:67433395 | 15  | 67.43340 | 0.006358279 | Credible Set | purple |
| chr15:67439974 | 15  | 67.43997 | 0.006350720 | Credible Set | purple |
| chr15:67530570 | 15  | 67.53057 | 0.006236362 | Credible Set | purple |
| chr15:67555683 | 15  | 67.55568 | 0.006458702 | Credible Set | purple |
| chr15:67627161 | 15  | 67.62716 | 0.018660436 | Credible Set | purple |
| chr15:67627183 | 15  | 67.62718 | 0.019240017 | Credible Set | purple |
| chr15:67627194 | 15  | 67.62719 | 0.019169201 | Credible Set | purple |
| chr15:67685224 | 15  | 67.68522 | 0.012050550 | Credible Set | purple |
| chr15:67685781 | 15  | 67.68578 | 0.011217577 | Credible Set | purple |
| chr15:67727448 | 15  | 67.72745 | 0.007843457 | Credible Set | purple |
| chr15:67812971 | 15  | 67.81297 | 0.006043895 | Credible Set | purple |
| chr15:67838708 | 15  | 67.83871 | 0.003403577 | Credible Set | purple |
| chr15:67838720 | 15  | 67.83872 | 0.003375711 | Credible Set | purple |
| chr15:67838721 | 15  | 67.83872 | 0.003438125 | Credible Set | purple |

F39–43 GBS, open field, minimum distance to center in 2nd 5 minutes (cm)

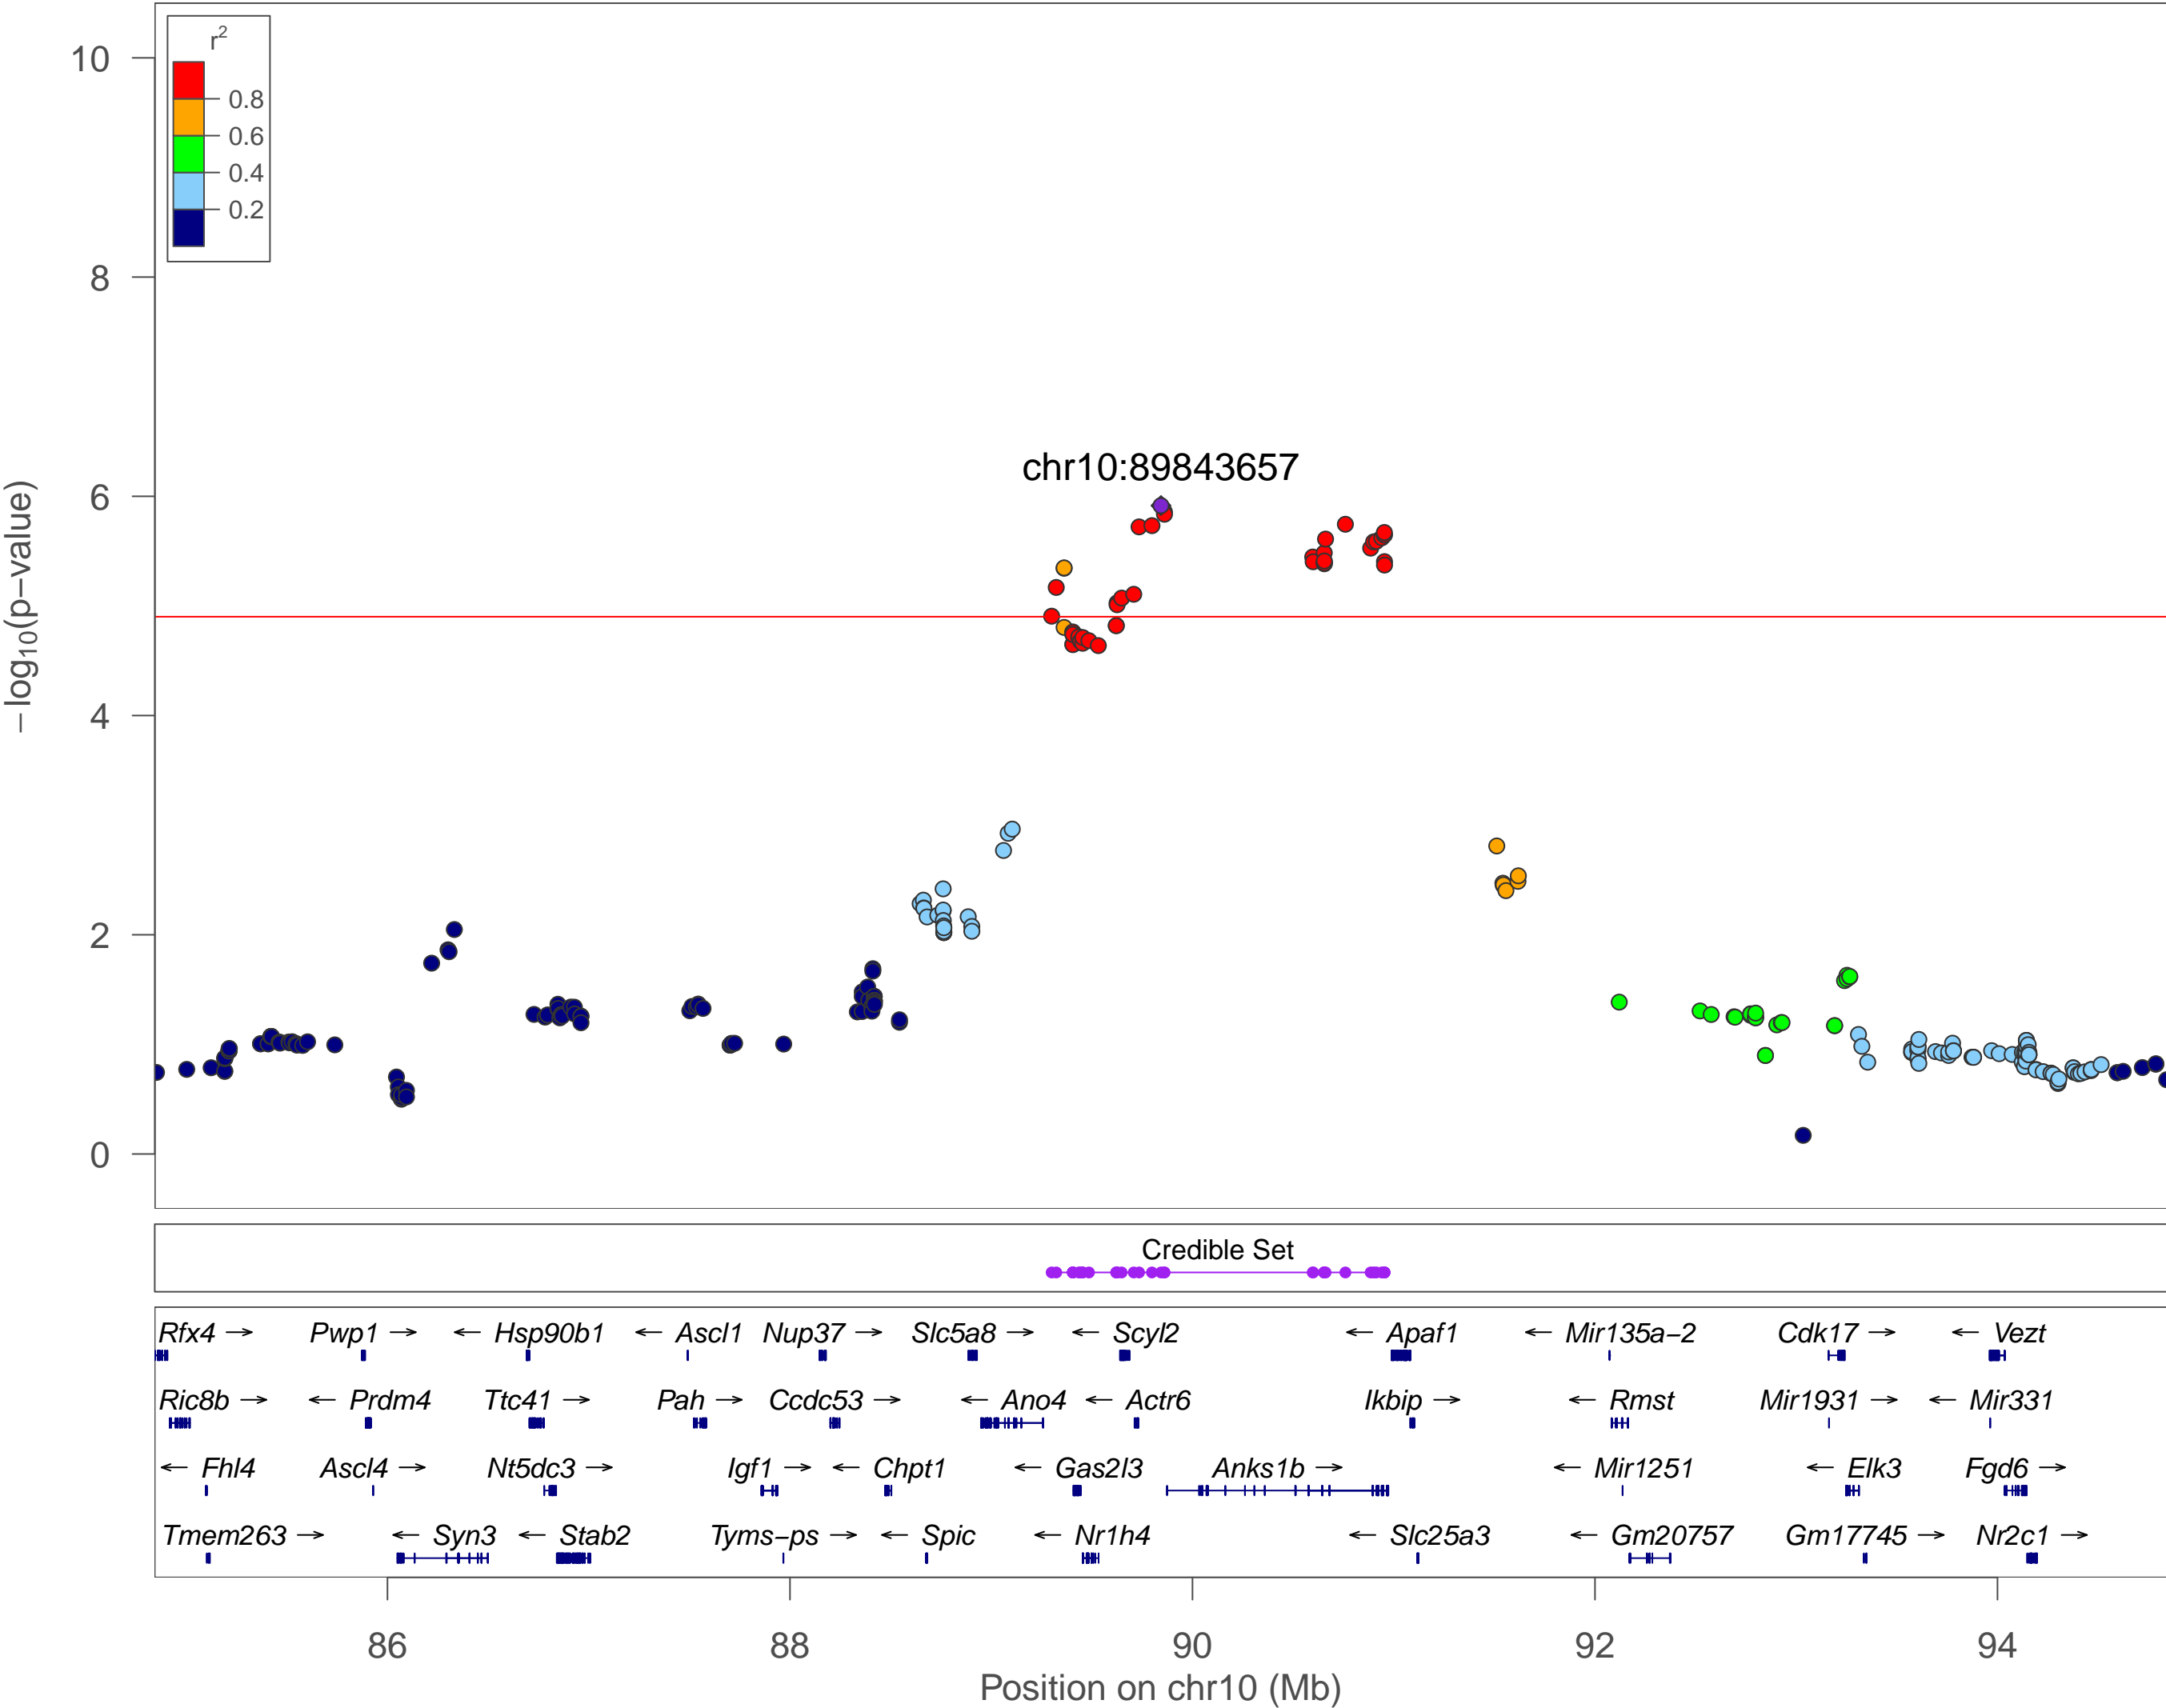

date: Thu Oct 25 17:25:35 2018  
build: F3943GBS  
display range: chr10:84843657–94843657 [84843657–94843657]  
hilite range: 0 – 0 [ 0 – 0 ]  
reference SNP: chr10:89843657  
number of SNPs plotted: 279  
min P-value: 1.22E–6 [chr10:89843657]  
max P-value: 6.76E–1 [chr10:93034582]  
omitted Genes: Mterf2, Cry1, Btbd11  
omitted Genes: Rtcb, Bpifc, Fbxo7  
omitted Genes: 4930486F22Rik, Timp3, 1810014B01Rik  
omitted Genes: 1700113H08Rik, Pmch, Parpbp  
omitted Genes: Dram1, Gnptab, Sycp3  
omitted Genes: Mybpc1, Gm4925, Arl1  
omitted Genes: Utp20, Slc17a8, 1500026H17Rik  
omitted Genes: Uhrf1bp1l, Tmpo, Nedd1  
omitted Genes: Mir7688, Lta4h, Hal  
omitted Genes: Amdhd1, Ccdc38, Snrpf  
omitted Genes: 4933408J17Rik, Ntn4, Gm8580  
omitted Genes: Gm15915, Usp44, Metap2  
omitted Genes: Ndufa12, Gm4792, Tmcc3  
omitted Genes: Mir7211, Cep83os, Cep83  
omitted Genes: Plxnc1

## Fine-mapping Regions

| snp            | chr | pos (Mb) | pp          | group        | color  |
|----------------|-----|----------|-------------|--------------|--------|
| chr10:89300286 | 10  | 89.30029 | 0.007881034 | Credible Set | purple |
| chr10:89323084 | 10  | 89.32308 | 0.014030792 | Credible Set | purple |
| chr10:89405522 | 10  | 89.40552 | 0.004490975 | Credible Set | purple |
| chr10:89405556 | 10  | 89.40556 | 0.005729703 | Credible Set | purple |
| chr10:89405564 | 10  | 89.40556 | 0.005729703 | Credible Set | purple |
| chr10:89405589 | 10  | 89.40559 | 0.005479471 | Credible Set | purple |
| chr10:89405627 | 10  | 89.40563 | 0.005476568 | Credible Set | purple |
| chr10:89435280 | 10  | 89.43528 | 0.005212697 | Credible Set | purple |
| chr10:89443390 | 10  | 89.44339 | 0.004782635 | Credible Set | purple |
| chr10:89454154 | 10  | 89.45415 | 0.004580889 | Credible Set | purple |
| chr10:89454848 | 10  | 89.45485 | 0.005135398 | Credible Set | purple |
| chr10:89485534 | 10  | 89.48553 | 0.004825721 | Credible Set | purple |
| chr10:89621284 | 10  | 89.62128 | 0.006538935 | Credible Set | purple |
| chr10:89621319 | 10  | 89.62132 | 0.006507063 | Credible Set | purple |
| chr10:89625488 | 10  | 89.62549 | 0.010285437 | Credible Set | purple |
| chr10:89625559 | 10  | 89.62556 | 0.009912130 | Credible Set | purple |
| chr10:89647994 | 10  | 89.64799 | 0.011330864 | Credible Set | purple |
| chr10:89708192 | 10  | 89.70819 | 0.012229407 | Credible Set | purple |
| chr10:89734590 | 10  | 89.73459 | 0.047512984 | Credible Set | purple |
| chr10:89798643 | 10  | 89.79864 | 0.048713569 | Credible Set | purple |
| chr10:89843657 | 10  | 89.84366 | 0.072985672 | Credible Set | purple |
| chr10:89860498 | 10  | 89.86050 | 0.064329409 | Credible Set | purple |
| chr10:89860846 | 10  | 89.86085 | 0.061311481 | Credible Set | purple |
| chr10:90597510 | 10  | 90.59751 | 0.025879311 | Credible Set | purple |
| chr10:90599690 | 10  | 90.59969 | 0.023518083 | Credible Set | purple |
| chr10:90654718 | 10  | 90.65472 | 0.028128409 | Credible Set | purple |
| chr10:90654994 | 10  | 90.65499 | 0.022586308 | Credible Set | purple |
| chr10:90654998 | 10  | 90.65500 | 0.023434447 | Credible Set | purple |
| chr10:90655002 | 10  | 90.65500 | 0.022854374 | Credible Set | purple |
| chr10:90655039 | 10  | 90.65504 | 0.023867980 | Credible Set | purple |
| chr10:90661222 | 10  | 90.66122 | 0.037154221 | Credible Set | purple |
| chr10:90759813 | 10  | 90.75981 | 0.050097333 | Credible Set | purple |
| chr10:90885383 | 10  | 90.88538 | 0.030949421 | Credible Set | purple |
| chr10:90899946 | 10  | 90.89995 | 0.035095899 | Credible Set | purple |
| chr10:90913583 | 10  | 90.91358 | 0.035510922 | Credible Set | purple |
| chr10:90940720 | 10  | 90.94072 | 0.038119699 | Credible Set | purple |



Fine-mapping Regions

| snp            | chr | pos (Mb) | pp         | group        | color  |
|----------------|-----|----------|------------|--------------|--------|
| chr10:90953385 | 10  | 90.95338 | 0.04030947 | Credible Set | purple |
| chr10:90953402 | 10  | 90.95340 | 0.04063134 | Credible Set | purple |
| chr10:90953425 | 10  | 90.95342 | 0.04243464 | Credible Set | purple |
| chr10:90954053 | 10  | 90.95405 | 0.02357875 | Credible Set | purple |
| chr10:90954116 | 10  | 90.95412 | 0.02200545 | Credible Set | purple |

F39–43 GBS, open field, immobile duration in 2nd 5 minutes (s)

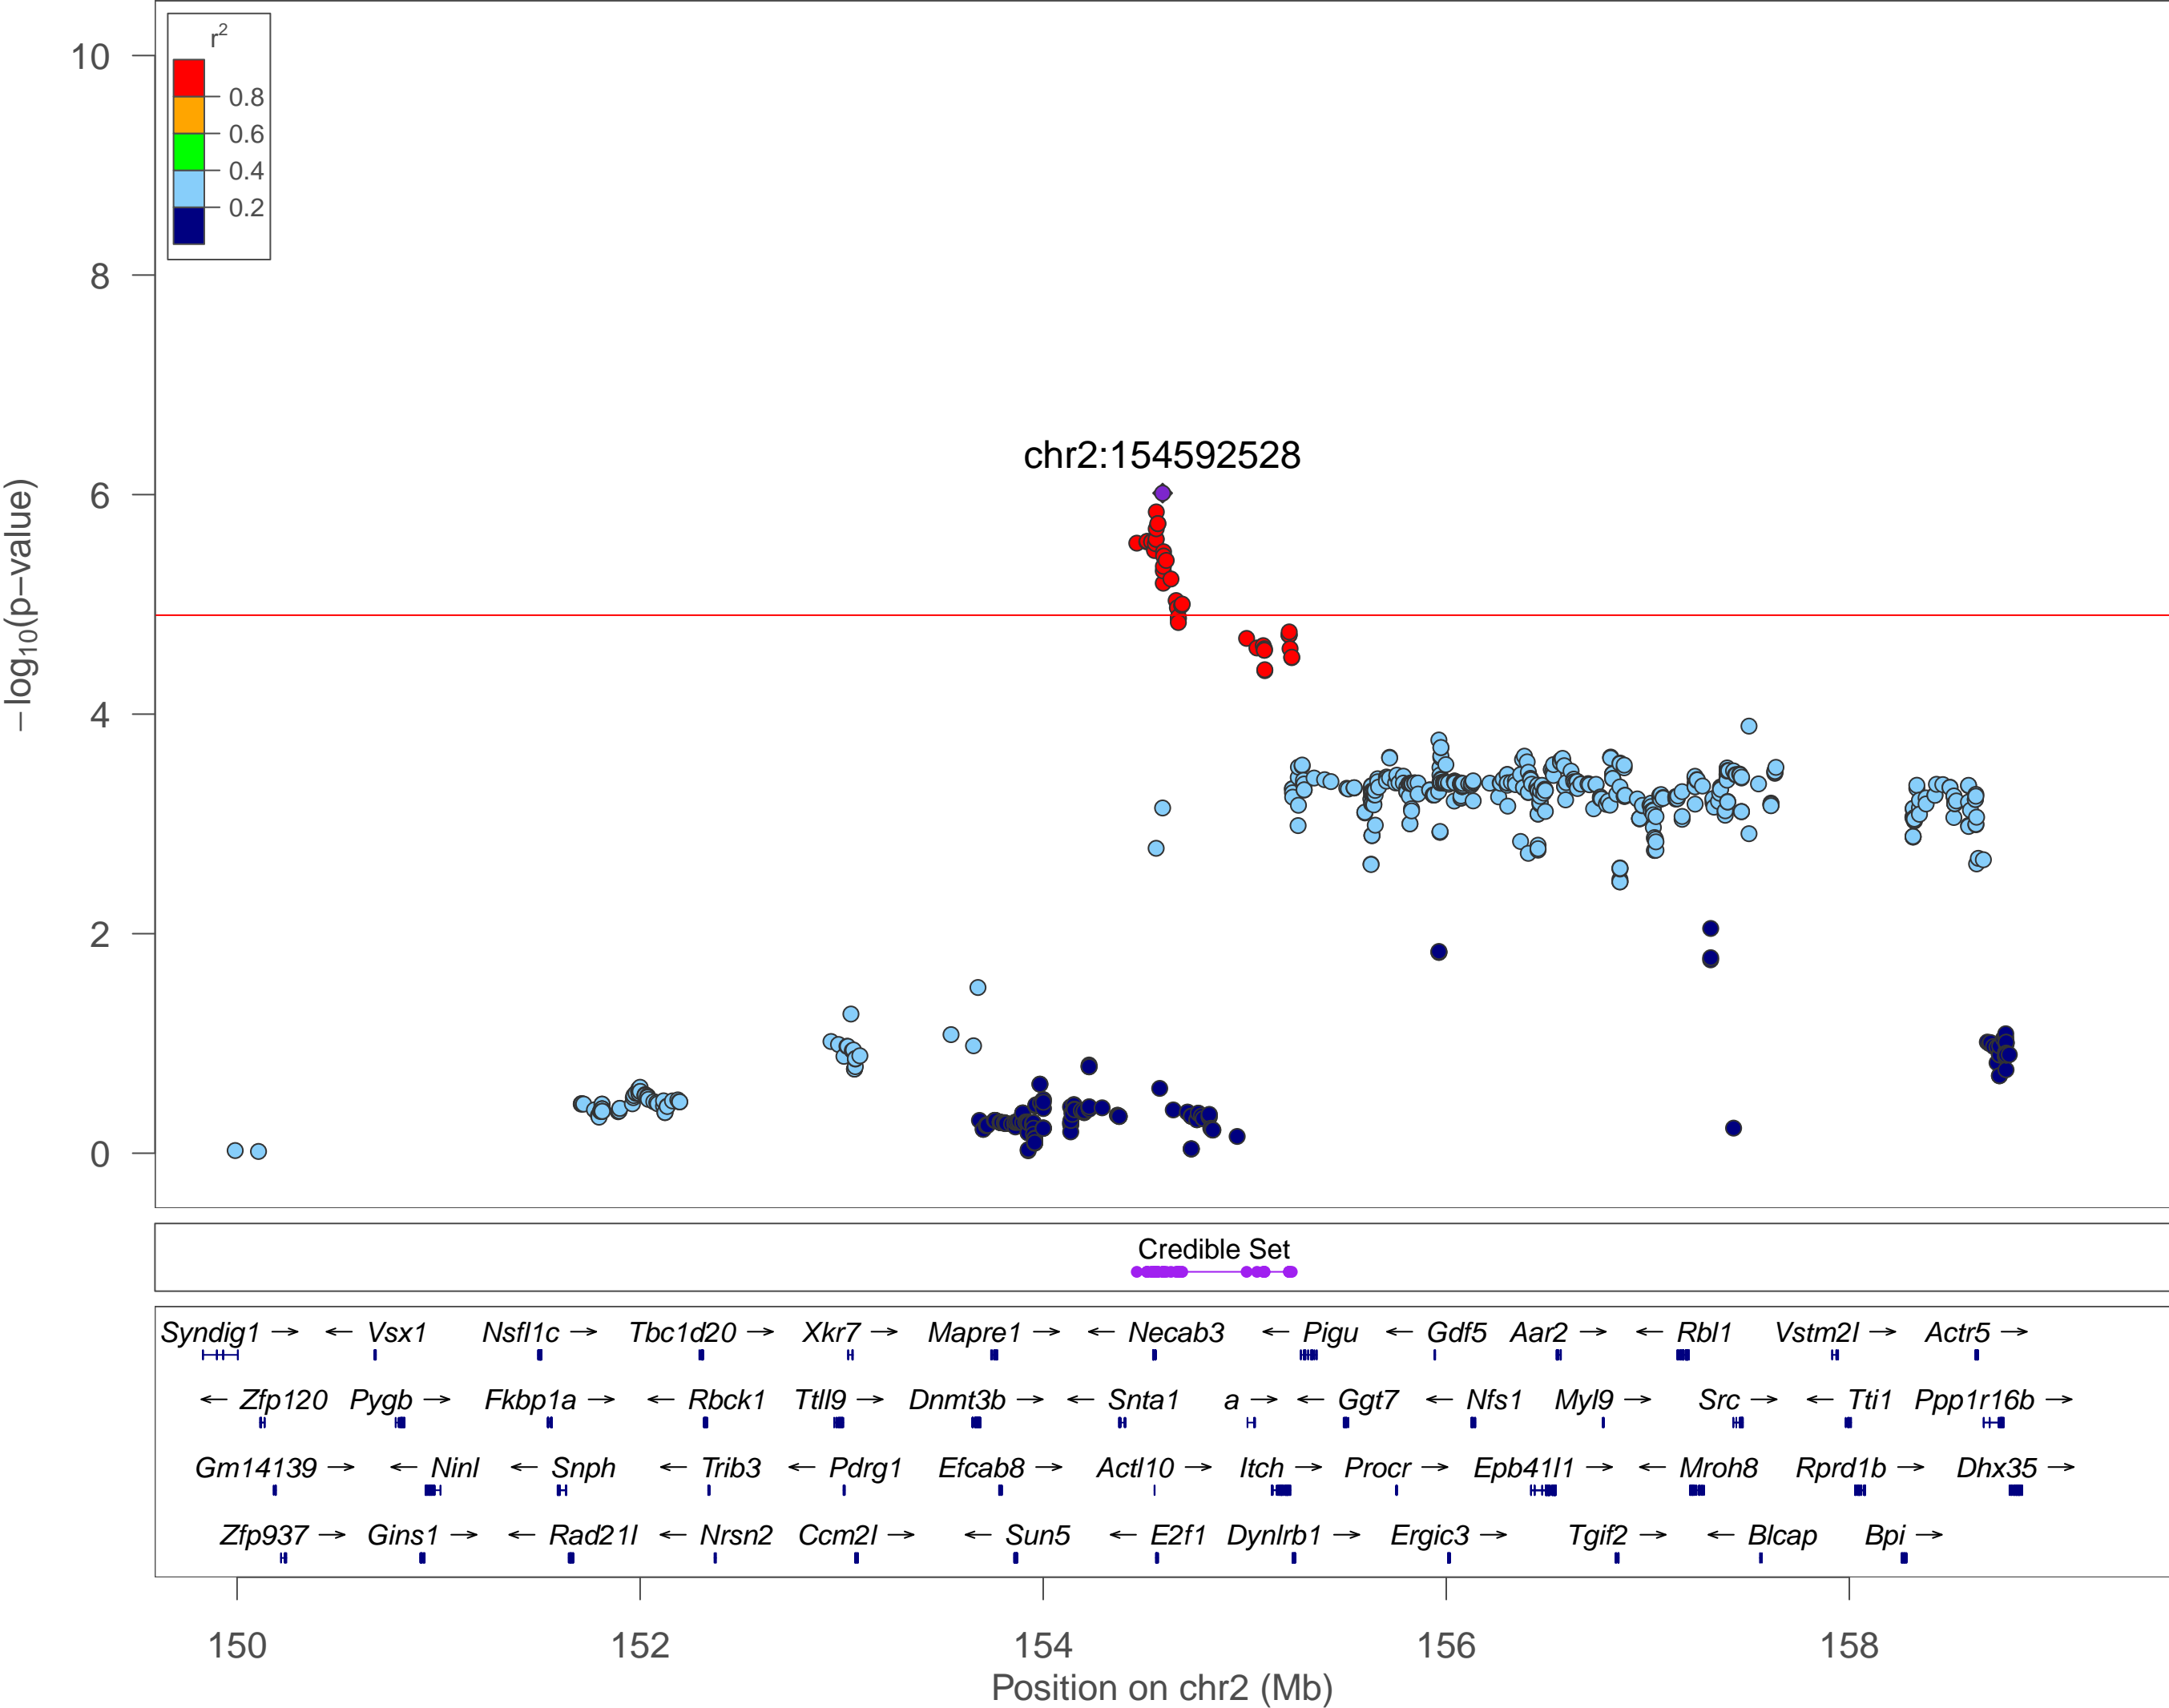

date: Thu Oct 25 17:24:48 2018

build: F3943GBS

display range: chr2:149592528–159592528 [149592528–159592528]

hilite range: 0 – 0 [ 0 – 0 ]

reference SNP: chr2:154592528

number of SNPs plotted: 757

min P-value: 9.7E–7 [chr2:154592528]

max P-value: 9.63E–1 [chr2:150106309]

omitted Genes: Gm14124, 3300002I08Rik, Zfp442

omitted Genes: Zfp345, Cst7, Apmap

omitted Genes: Acss1, E130215H24Rik, Entpd6

omitted Genes: Abhd12, Nanp, Gm14151

omitted Genes: 4930442J19Rik, LOC100125594, 4921509C19Rik

omitted Genes: Sdcbp2, Tmem74b, Psmf1

omitted Genes: Rspo4, Angpt4, Mir1953

omitted Genes: Fam110a, Slc52a3, Scrt2

omitted Genes: Srxn1, Tcf15, Csnk2a1

omitted Genes: Gm14164, Sox12, Zcchc3

omitted Genes: 6820408C15Rik, Defb23, Defb20

omitted Genes: Defb22, Defb26, Defb28

omitted Genes: Defb29, Defb21, Defb19

omitted Genes: Defb45, Defb36, Defb25

omitted Genes: Rem1, H13, Mcts2

omitted Genes: Id1, Cox4i2, Bcl2l1

omitted Genes: Tpx2, Mir5622, Mylk2

omitted Genes: Foxs1, Dusp15, Hck

omitted Genes: Tm9sf4, Tspyl3, Plagl2

omitted Genes: Pofut1, Kif3b, 2500004C02Rik

omitted Genes: Asxl1, Nol4l, Commd7

omitted Genes: Bpifb2, Bpifb6, Bpifb3

omitted Genes: Bpifb4, Bpifa6, Bpifa2

omitted Genes: Bpifa3, Bpifa1, Bpifa5

omitted Genes: Bpifb1, Bpifb5, Bpifb9a

omitted Genes: Bpifb9b, Cdk5rap1, Cbfa2t2

omitted Genes: 1700003F12Rik, Pxmp4, Zfp341

omitted Genes: Chmp4b, Raly, Eif2s2

omitted Genes: Ahcy, 2310005A03Rik, Map1lc3a

omitted Genes: Mir695, Trp53inp2, Ncoa6

omitted Genes: Acss2, Acss2os, Gss

omitted Genes: Myh7b, Mir499, Trnc4ap

Make more plots at <http://csg.sph.umich.edu/locuszoom/>

## Fine-mapping Regions

| snp            | chr | pos (Mb) | pp          | group        | color  |
|----------------|-----|----------|-------------|--------------|--------|
| chr2:154464466 | 2   | 154.4645 | 0.035286527 | Credible Set | purple |
| chr2:154513996 | 2   | 154.5140 | 0.036271254 | Credible Set | purple |
| chr2:154515752 | 2   | 154.5158 | 0.036417311 | Credible Set | purple |
| chr2:154516249 | 2   | 154.5162 | 0.036630633 | Credible Set | purple |
| chr2:154537995 | 2   | 154.5380 | 0.036352452 | Credible Set | purple |
| chr2:154538009 | 2   | 154.5380 | 0.036261717 | Credible Set | purple |
| chr2:154552607 | 2   | 154.5526 | 0.030876085 | Credible Set | purple |
| chr2:154552612 | 2   | 154.5526 | 0.030404513 | Credible Set | purple |
| chr2:154556468 | 2   | 154.5565 | 0.034983777 | Credible Set | purple |
| chr2:154560354 | 2   | 154.5604 | 0.038234556 | Credible Set | purple |
| chr2:154560360 | 2   | 154.5604 | 0.038191772 | Credible Set | purple |
| chr2:154560680 | 2   | 154.5607 | 0.047096613 | Credible Set | purple |
| chr2:154561127 | 2   | 154.5611 | 0.066223474 | Credible Set | purple |
| chr2:154569018 | 2   | 154.5690 | 0.052319012 | Credible Set | purple |
| chr2:154569036 | 2   | 154.5690 | 0.052334620 | Credible Set | purple |
| chr2:154592528 | 2   | 154.5925 | 0.096694605 | Credible Set | purple |
| chr2:154595741 | 2   | 154.5957 | 0.015770754 | Credible Set | purple |
| chr2:154595774 | 2   | 154.5958 | 0.020210672 | Credible Set | purple |
| chr2:154596294 | 2   | 154.5963 | 0.022143255 | Credible Set | purple |
| chr2:154597124 | 2   | 154.5971 | 0.029691904 | Credible Set | purple |
| chr2:154597483 | 2   | 154.5975 | 0.027252388 | Credible Set | purple |
| chr2:154610318 | 2   | 154.6103 | 0.024933804 | Credible Set | purple |
| chr2:154633945 | 2   | 154.6339 | 0.017170610 | Credible Set | purple |
| chr2:154659631 | 2   | 154.6596 | 0.011141211 | Credible Set | purple |
| chr2:154665835 | 2   | 154.6658 | 0.009651117 | Credible Set | purple |
| chr2:154670525 | 2   | 154.6705 | 0.007735798 | Credible Set | purple |
| chr2:154670528 | 2   | 154.6705 | 0.007793134 | Credible Set | purple |
| chr2:154670562 | 2   | 154.6706 | 0.008035652 | Credible Set | purple |
| chr2:154670571 | 2   | 154.6706 | 0.007175127 | Credible Set | purple |
| chr2:154686815 | 2   | 154.6868 | 0.010112313 | Credible Set | purple |
| chr2:154689824 | 2   | 154.6898 | 0.010371693 | Credible Set | purple |
| chr2:155009299 | 2   | 155.0093 | 0.005223306 | Credible Set | purple |
| chr2:155060609 | 2   | 155.0606 | 0.004315967 | Credible Set | purple |
| chr2:155091628 | 2   | 155.0916 | 0.004519797 | Credible Set | purple |
| chr2:155097606 | 2   | 155.0976 | 0.004250527 | Credible Set | purple |
| chr2:155097628 | 2   | 155.0976 | 0.004125484 | Credible Set | purple |

Fine-mapping Regions

| snp            | chr | pos (Mb) | pp          | group        | color  |
|----------------|-----|----------|-------------|--------------|--------|
| chr2:155097650 | 2   | 155.0976 | 0.004125190 | Credible Set | purple |
| chr2:155220007 | 2   | 155.2200 | 0.005591515 | Credible Set | purple |
| chr2:155220040 | 2   | 155.2200 | 0.005591515 | Credible Set | purple |
| chr2:155220051 | 2   | 155.2201 | 0.005591515 | Credible Set | purple |
| chr2:155220725 | 2   | 155.2207 | 0.005946901 | Credible Set | purple |
| chr2:155224800 | 2   | 155.2248 | 0.004255826 | Credible Set | purple |
| chr2:155233265 | 2   | 155.2333 | 0.003591229 | Credible Set | purple |

F39–43 GBS, open field, immobile duration in 2nd 5 minutes (s)

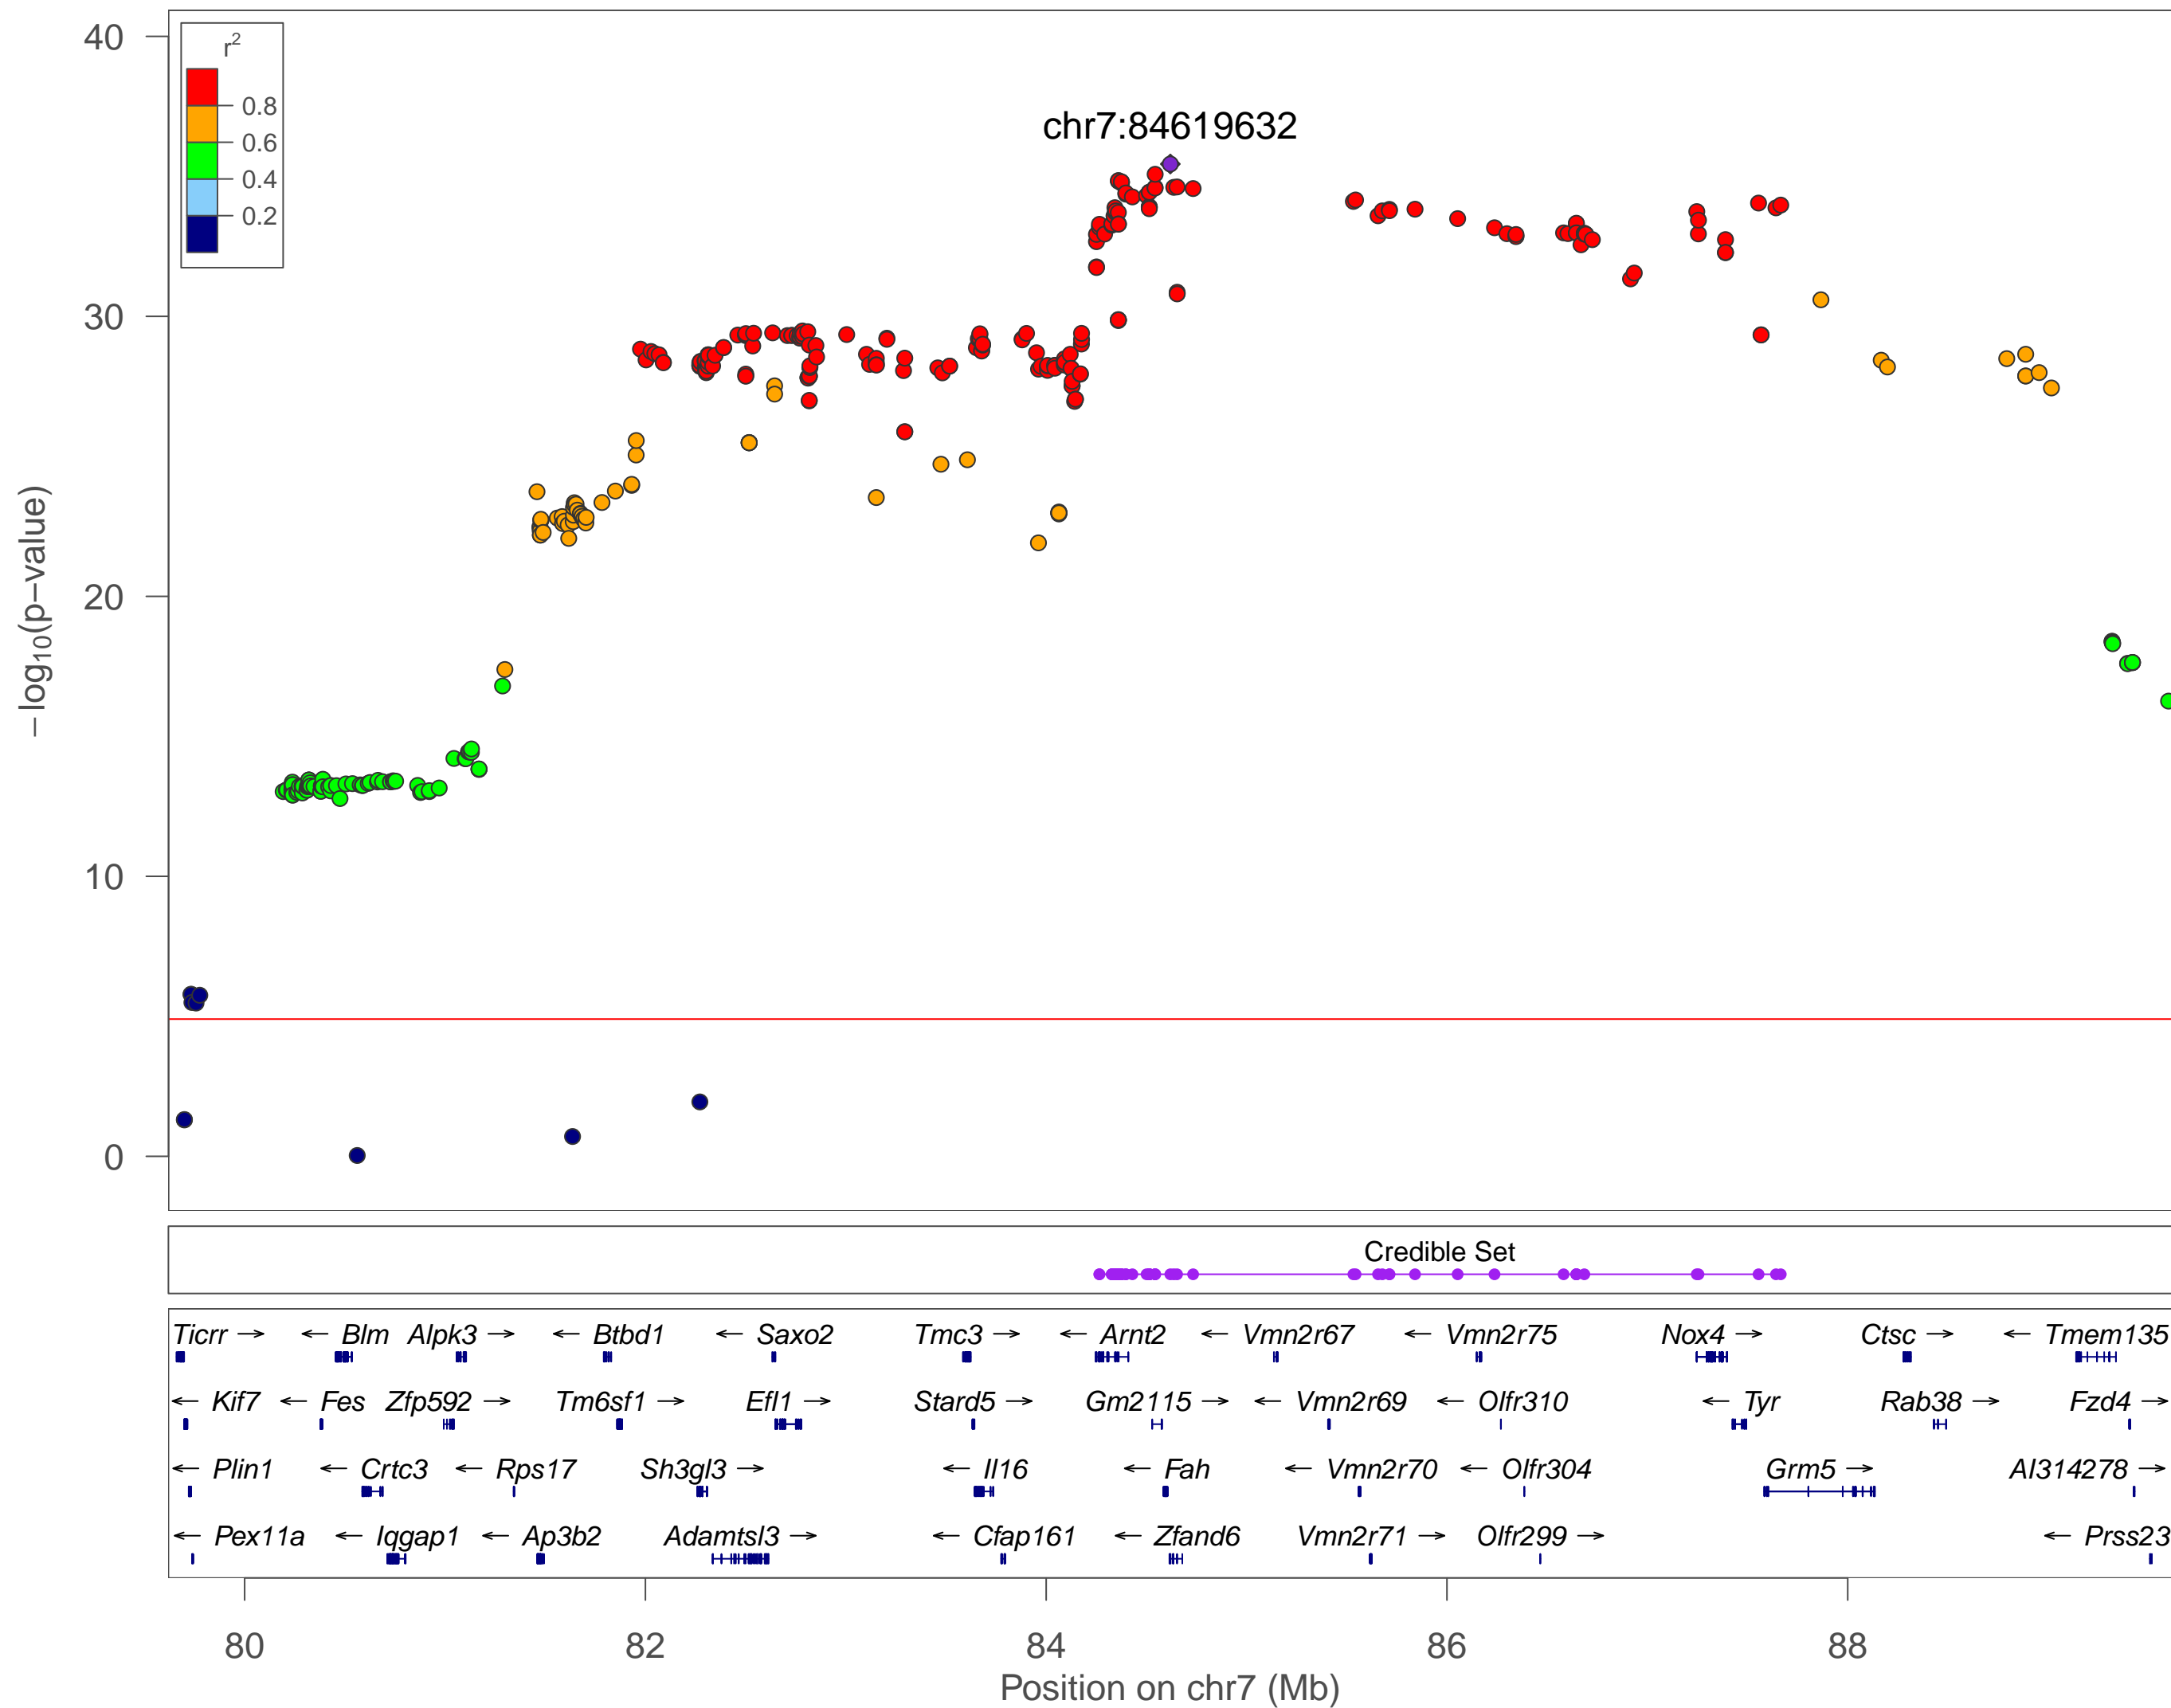

date: Thu Oct 25 17:24:57 2018  
build: F3943GBS  
display range: chr7:79619632–89619632 [79619632–89619632]  
hilite range: 0 – 0 [ 0 – 0 ]  
reference SNP: chr7:84619632  
number of SNPs plotted: 391  
min P-value: 3.62E–36 [chr7:84619632]  
max P-value: 9.31E–1 [chr7:80561830]  
omitted Genes: Wdr93, Mesp1, Mesp2  
omitted Genes: Anpep, Ap3s2, Arpin  
omitted Genes: Zfp710, Gm21057, Idh2  
omitted Genes: Sema4b, Cib1, Gdp1p1  
omitted Genes: Tll13, Ngrn, Vps33b  
omitted Genes: Prc1, Rccd1, Unc45a  
omitted Genes: Hddc3, Man2a2, Furin  
omitted Genes: Gm15880, Zscan2, Wdr73  
omitted Genes: Nmb, Sec11a, Slc28a1  
omitted Genes: Pde8a, Cpeb1, BC048679  
omitted Genes: 2900076A07Rik, Mir1839, Fsd2  
omitted Genes: Whamm, Homer2, Fam103a1  
omitted Genes: 3110040N11Rik, Hdgfrp3, Bnc1  
omitted Genes: Gm20744, 4933406J10Rik, Mex3b  
omitted Genes: 4933430H16Rik, Mesdc1, Mesdc2  
omitted Genes: Cemip, Abhd17c, 2610206C17Rik  
omitted Genes: Olfr291, Olfr290, Vmn2r65  
omitted Genes: Vmn2r66, Vmn2r68, Vmn2r72  
omitted Genes: Vmn2r73, Vmn2r74, Vmn2r76  
omitted Genes: Olfr309, Olfr308, Olfr307  
omitted Genes: Olfr305, Olfr303, Olfr301  
omitted Genes: Olfr298, Olfr297, Olfr295  
omitted Genes: Olfr294, Olfr293, Olfr292  
omitted Genes: Folh1, Vmn2r77, Vmn2r78  
omitted Genes: Vmn2r79

## Fine-mapping Regions

| snp           | chr | pos (Mb) | pp          | group        | color  |
|---------------|-----|----------|-------------|--------------|--------|
| chr7:84265410 | 7   | 84.26541 | 0.001183419 | Credible Set | purple |
| chr7:84265685 | 7   | 84.26569 | 0.001509007 | Credible Set | purple |
| chr7:84327288 | 7   | 84.32729 | 0.001401618 | Credible Set | purple |
| chr7:84327808 | 7   | 84.32781 | 0.001552073 | Credible Set | purple |
| chr7:84327850 | 7   | 84.32785 | 0.001545965 | Credible Set | purple |
| chr7:84338595 | 7   | 84.33859 | 0.002998816 | Credible Set | purple |
| chr7:84343118 | 7   | 84.34312 | 0.005858123 | Credible Set | purple |
| chr7:84344805 | 7   | 84.34480 | 0.004029253 | Credible Set | purple |
| chr7:84347423 | 7   | 84.34742 | 0.004526111 | Credible Set | purple |
| chr7:84360038 | 7   | 84.36004 | 0.003963513 | Credible Set | purple |
| chr7:84360626 | 7   | 84.36063 | 0.001553613 | Credible Set | purple |
| chr7:84360642 | 7   | 84.36064 | 0.001525472 | Credible Set | purple |
| chr7:84360703 | 7   | 84.36070 | 0.050889386 | Credible Set | purple |
| chr7:84360714 | 7   | 84.36071 | 0.053201226 | Credible Set | purple |
| chr7:84360716 | 7   | 84.36072 | 0.053201226 | Credible Set | purple |
| chr7:84375526 | 7   | 84.37553 | 0.044215699 | Credible Set | purple |
| chr7:84375577 | 7   | 84.37558 | 0.047425076 | Credible Set | purple |
| chr7:84375642 | 7   | 84.37564 | 0.048536816 | Credible Set | purple |
| chr7:84397575 | 7   | 84.39758 | 0.017691865 | Credible Set | purple |
| chr7:84397597 | 7   | 84.39760 | 0.019455578 | Credible Set | purple |
| chr7:84430102 | 7   | 84.43010 | 0.014131985 | Credible Set | purple |
| chr7:84501082 | 7   | 84.50108 | 0.015769948 | Credible Set | purple |
| chr7:84514082 | 7   | 84.51408 | 0.020790519 | Credible Set | purple |
| chr7:84514444 | 7   | 84.51444 | 0.006400261 | Credible Set | purple |
| chr7:84514505 | 7   | 84.51450 | 0.006094613 | Credible Set | purple |
| chr7:84514564 | 7   | 84.51456 | 0.006123336 | Credible Set | purple |
| chr7:84514575 | 7   | 84.51457 | 0.005391904 | Credible Set | purple |
| chr7:84514734 | 7   | 84.51473 | 0.020708261 | Credible Set | purple |
| chr7:84543346 | 7   | 84.54335 | 0.030263351 | Credible Set | purple |
| chr7:84543355 | 7   | 84.54336 | 0.029230233 | Credible Set | purple |
| chr7:84543782 | 7   | 84.54378 | 0.089896894 | Credible Set | purple |
| chr7:84619632 | 7   | 84.61963 | 0.207457240 | Credible Set | purple |
| chr7:84636759 | 7   | 84.63676 | 0.030910316 | Credible Set | purple |
| chr7:84653095 | 7   | 84.65309 | 0.031909170 | Credible Set | purple |
| chr7:84733186 | 7   | 84.73319 | 0.027921200 | Credible Set | purple |
| chr7:85533207 | 7   | 85.53321 | 0.009769245 | Credible Set | purple |



# Fine-mapping Regions

| snp           | chr | pos (Mb) | pp           | group        | color  |
|---------------|-----|----------|--------------|--------------|--------|
| chr7:85543843 | 7   | 85.54384 | 0.0110083725 | Credible Set | purple |
| chr7:85656243 | 7   | 85.65624 | 0.0030240920 | Credible Set | purple |
| chr7:85677494 | 7   | 85.67749 | 0.0045119519 | Credible Set | purple |
| chr7:85712663 | 7   | 85.71266 | 0.0050950184 | Credible Set | purple |
| chr7:85712975 | 7   | 85.71298 | 0.0045901339 | Credible Set | purple |
| chr7:85840665 | 7   | 85.84067 | 0.0051785105 | Credible Set | purple |
| chr7:86053386 | 7   | 86.05339 | 0.0023920905 | Credible Set | purple |
| chr7:86237374 | 7   | 86.23737 | 0.0011361793 | Credible Set | purple |
| chr7:86582139 | 7   | 86.58214 | 0.0007483074 | Credible Set | purple |
| chr7:86645719 | 7   | 86.64572 | 0.0015866035 | Credible Set | purple |
| chr7:86645792 | 7   | 86.64579 | 0.0016436241 | Credible Set | purple |
| chr7:86645947 | 7   | 86.64595 | 0.0007312383 | Credible Set | purple |
| chr7:86645990 | 7   | 86.64599 | 0.0007466666 | Credible Set | purple |
| chr7:86685507 | 7   | 86.68551 | 0.0007236343 | Credible Set | purple |
| chr7:87246786 | 7   | 87.24679 | 0.0042594462 | Credible Set | purple |
| chr7:87255156 | 7   | 87.25516 | 0.0021102153 | Credible Set | purple |
| chr7:87554961 | 7   | 87.55496 | 0.0085326206 | Credible Set | purple |
| chr7:87642045 | 7   | 87.64204 | 0.0057800749 | Credible Set | purple |
| chr7:87665727 | 7   | 87.66573 | 0.0072430847 | Credible Set | purple |

# F34 GBS, QT body weight

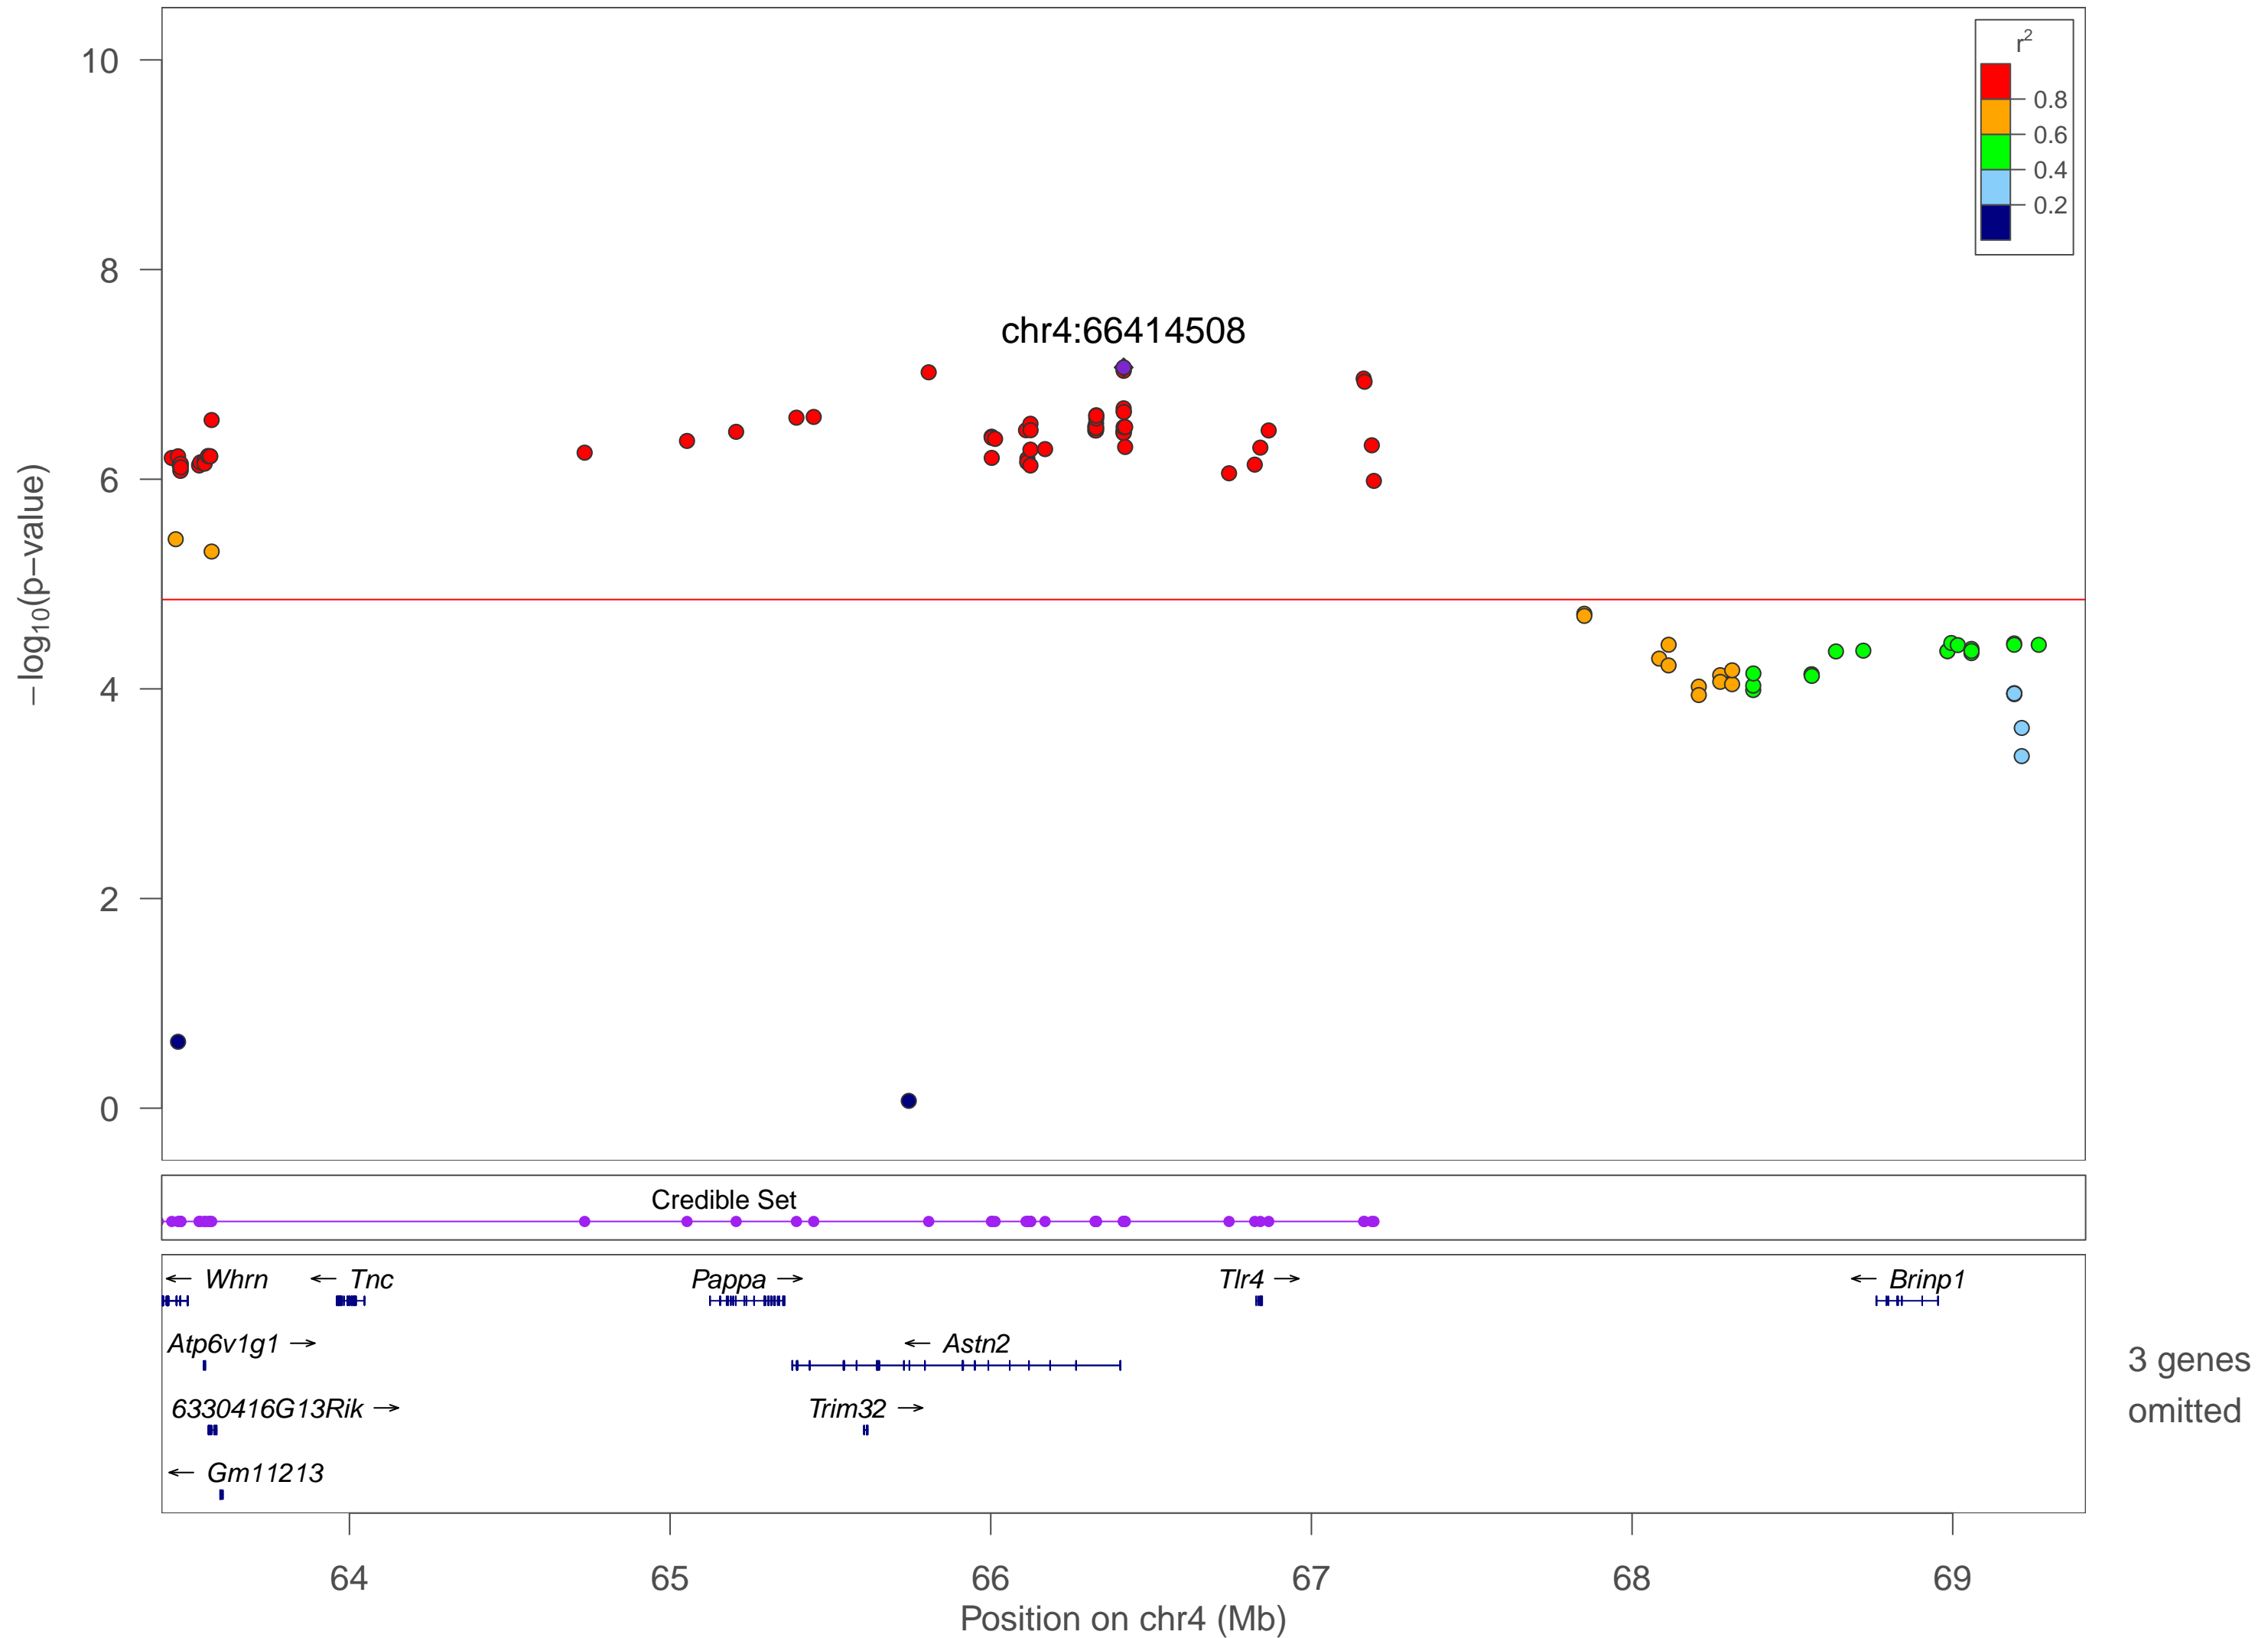

date: Tue Sep 17 12:15:21 2019

build: F34GBS

display range: chr4:63414508–69414508 [63414508–69414508]

hilite range: 0 – 0 [ 0 – 0 ]

reference SNP: chr4:66414508

number of SNPs plotted: 108

min P-value: 8.58E–8 [chr4:66414508]

max P-value: 8.51E–1 [chr4:65744347]

omitted Genes: 1700018C11Rik, Tnfsf15, Tnfsf8

## Fine-mapping Regions

| snp           | chr | pos (Mb) | pp          | group        | color  |
|---------------|-----|----------|-------------|--------------|--------|
| chr4:63143387 | 4   | 63.14339 | 0.004698956 | Credible Set | purple |
| chr4:63270812 | 4   | 63.27081 | 0.005040961 | Credible Set | purple |
| chr4:63291699 | 4   | 63.29170 | 0.003757469 | Credible Set | purple |
| chr4:63291735 | 4   | 63.29174 | 0.003734994 | Credible Set | purple |
| chr4:63292002 | 4   | 63.29200 | 0.003505914 | Credible Set | purple |
| chr4:63292021 | 4   | 63.29202 | 0.003518227 | Credible Set | purple |
| chr4:63331035 | 4   | 63.33103 | 0.003082134 | Credible Set | purple |
| chr4:63403594 | 4   | 63.40359 | 0.005856435 | Credible Set | purple |
| chr4:63445899 | 4   | 63.44590 | 0.007522469 | Credible Set | purple |
| chr4:63465528 | 4   | 63.46553 | 0.007796089 | Credible Set | purple |
| chr4:63471028 | 4   | 63.47103 | 0.006501989 | Credible Set | purple |
| chr4:63471086 | 4   | 63.47109 | 0.006402085 | Credible Set | purple |
| chr4:63473150 | 4   | 63.47315 | 0.005766033 | Credible Set | purple |
| chr4:63473181 | 4   | 63.47318 | 0.005728894 | Credible Set | purple |
| chr4:63473231 | 4   | 63.47323 | 0.006446737 | Credible Set | purple |
| chr4:63473937 | 4   | 63.47394 | 0.006653827 | Credible Set | purple |
| chr4:63474009 | 4   | 63.47401 | 0.006165647 | Credible Set | purple |
| chr4:63531405 | 4   | 63.53140 | 0.006501680 | Credible Set | purple |
| chr4:63531436 | 4   | 63.53144 | 0.006415148 | Credible Set | purple |
| chr4:63535096 | 4   | 63.53510 | 0.006852821 | Credible Set | purple |
| chr4:63548238 | 4   | 63.54824 | 0.007112637 | Credible Set | purple |
| chr4:63548572 | 4   | 63.54857 | 0.006674177 | Credible Set | purple |
| chr4:63558825 | 4   | 63.55882 | 0.007839267 | Credible Set | purple |
| chr4:63565618 | 4   | 63.56562 | 0.007796089 | Credible Set | purple |
| chr4:63565712 | 4   | 63.56571 | 0.007796089 | Credible Set | purple |
| chr4:63570198 | 4   | 63.57020 | 0.016797286 | Credible Set | purple |
| chr4:64733521 | 4   | 64.73352 | 0.008412236 | Credible Set | purple |
| chr4:65052703 | 4   | 65.05270 | 0.010785097 | Credible Set | purple |
| chr4:65205920 | 4   | 65.20592 | 0.013083789 | Credible Set | purple |
| chr4:65393970 | 4   | 65.39397 | 0.017661657 | Credible Set | purple |
| chr4:65447841 | 4   | 65.44784 | 0.017937452 | Credible Set | purple |
| chr4:65806420 | 4   | 65.80642 | 0.046293956 | Credible Set | purple |
| chr4:66002530 | 4   | 66.00253 | 0.011799225 | Credible Set | purple |
| chr4:66003029 | 4   | 66.00303 | 0.007531875 | Credible Set | purple |
| chr4:66003164 | 4   | 66.00316 | 0.011529106 | Credible Set | purple |
| chr4:66013512 | 4   | 66.01351 | 0.011260430 | Credible Set | purple |

## Fine-mapping Regions

| snp           | chr | pos (Mb) | pp          | group        | color  |
|---------------|-----|----------|-------------|--------------|--------|
| chr4:66110072 | 4   | 66.11007 | 0.013528196 | Credible Set | purple |
| chr4:66114163 | 4   | 66.11416 | 0.007406093 | Credible Set | purple |
| chr4:66114164 | 4   | 66.11416 | 0.006854775 | Credible Set | purple |
| chr4:66114176 | 4   | 66.11418 | 0.006886572 | Credible Set | purple |
| chr4:66123765 | 4   | 66.12377 | 0.008972603 | Credible Set | purple |
| chr4:66123768 | 4   | 66.12377 | 0.006411278 | Credible Set | purple |
| chr4:66123832 | 4   | 66.12383 | 0.015524883 | Credible Set | purple |
| chr4:66124242 | 4   | 66.12424 | 0.013533366 | Credible Set | purple |
| chr4:66169378 | 4   | 66.16938 | 0.009068305 | Credible Set | purple |
| chr4:66325857 | 4   | 66.32586 | 0.014571718 | Credible Set | purple |
| chr4:66325987 | 4   | 66.32599 | 0.013479473 | Credible Set | purple |
| chr4:66328189 | 4   | 66.32819 | 0.013467463 | Credible Set | purple |
| chr4:66328195 | 4   | 66.32819 | 0.013481919 | Credible Set | purple |
| chr4:66328436 | 4   | 66.32844 | 0.014284943 | Credible Set | purple |
| chr4:66328528 | 4   | 66.32853 | 0.015626906 | Credible Set | purple |
| chr4:66328560 | 4   | 66.32856 | 0.014235844 | Credible Set | purple |
| chr4:66329044 | 4   | 66.32904 | 0.017382742 | Credible Set | purple |
| chr4:66329065 | 4   | 66.32906 | 0.018584246 | Credible Set | purple |
| chr4:66329095 | 4   | 66.32909 | 0.018431976 | Credible Set | purple |
| chr4:66414332 | 4   | 66.41433 | 0.013042819 | Credible Set | purple |
| chr4:66414345 | 4   | 66.41434 | 0.013287998 | Credible Set | purple |
| chr4:66414373 | 4   | 66.41437 | 0.012769120 | Credible Set | purple |
| chr4:66414374 | 4   | 66.41437 | 0.012774098 | Credible Set | purple |
| chr4:66414384 | 4   | 66.41438 | 0.014456612 | Credible Set | purple |
| chr4:66414387 | 4   | 66.41439 | 0.020187785 | Credible Set | purple |
| chr4:66414451 | 4   | 66.41445 | 0.021543054 | Credible Set | purple |
| chr4:66414476 | 4   | 66.41448 | 0.048583419 | Credible Set | purple |
| chr4:66414508 | 4   | 66.41451 | 0.051366043 | Credible Set | purple |
| chr4:66414513 | 4   | 66.41451 | 0.047774352 | Credible Set | purple |
| chr4:66414963 | 4   | 66.41496 | 0.019886022 | Credible Set | purple |
| chr4:66419064 | 4   | 66.41906 | 0.009487990 | Credible Set | purple |
| chr4:66419126 | 4   | 66.41913 | 0.014482327 | Credible Set | purple |
| chr4:66743103 | 4   | 66.74310 | 0.005437830 | Credible Set | purple |
| chr4:66823255 | 4   | 66.82326 | 0.006529644 | Credible Set | purple |
| chr4:66840696 | 4   | 66.84070 | 0.009358951 | Credible Set | purple |
| chr4:66866758 | 4   | 66.86676 | 0.013470804 | Credible Set | purple |

Fine-mapping Regions

| snp           | chr | pos (Mb) | pp          | group        | color  |
|---------------|-----|----------|-------------|--------------|--------|
| chr4:67163007 | 4   | 67.16301 | 0.040530974 | Credible Set | purple |
| chr4:67165680 | 4   | 67.16568 | 0.037882958 | Credible Set | purple |
| chr4:67188375 | 4   | 67.18837 | 0.009834075 | Credible Set | purple |
| chr4:67194875 | 4   | 67.19487 | 0.004629093 | Credible Set | purple |

F34 GBS, QT body weight

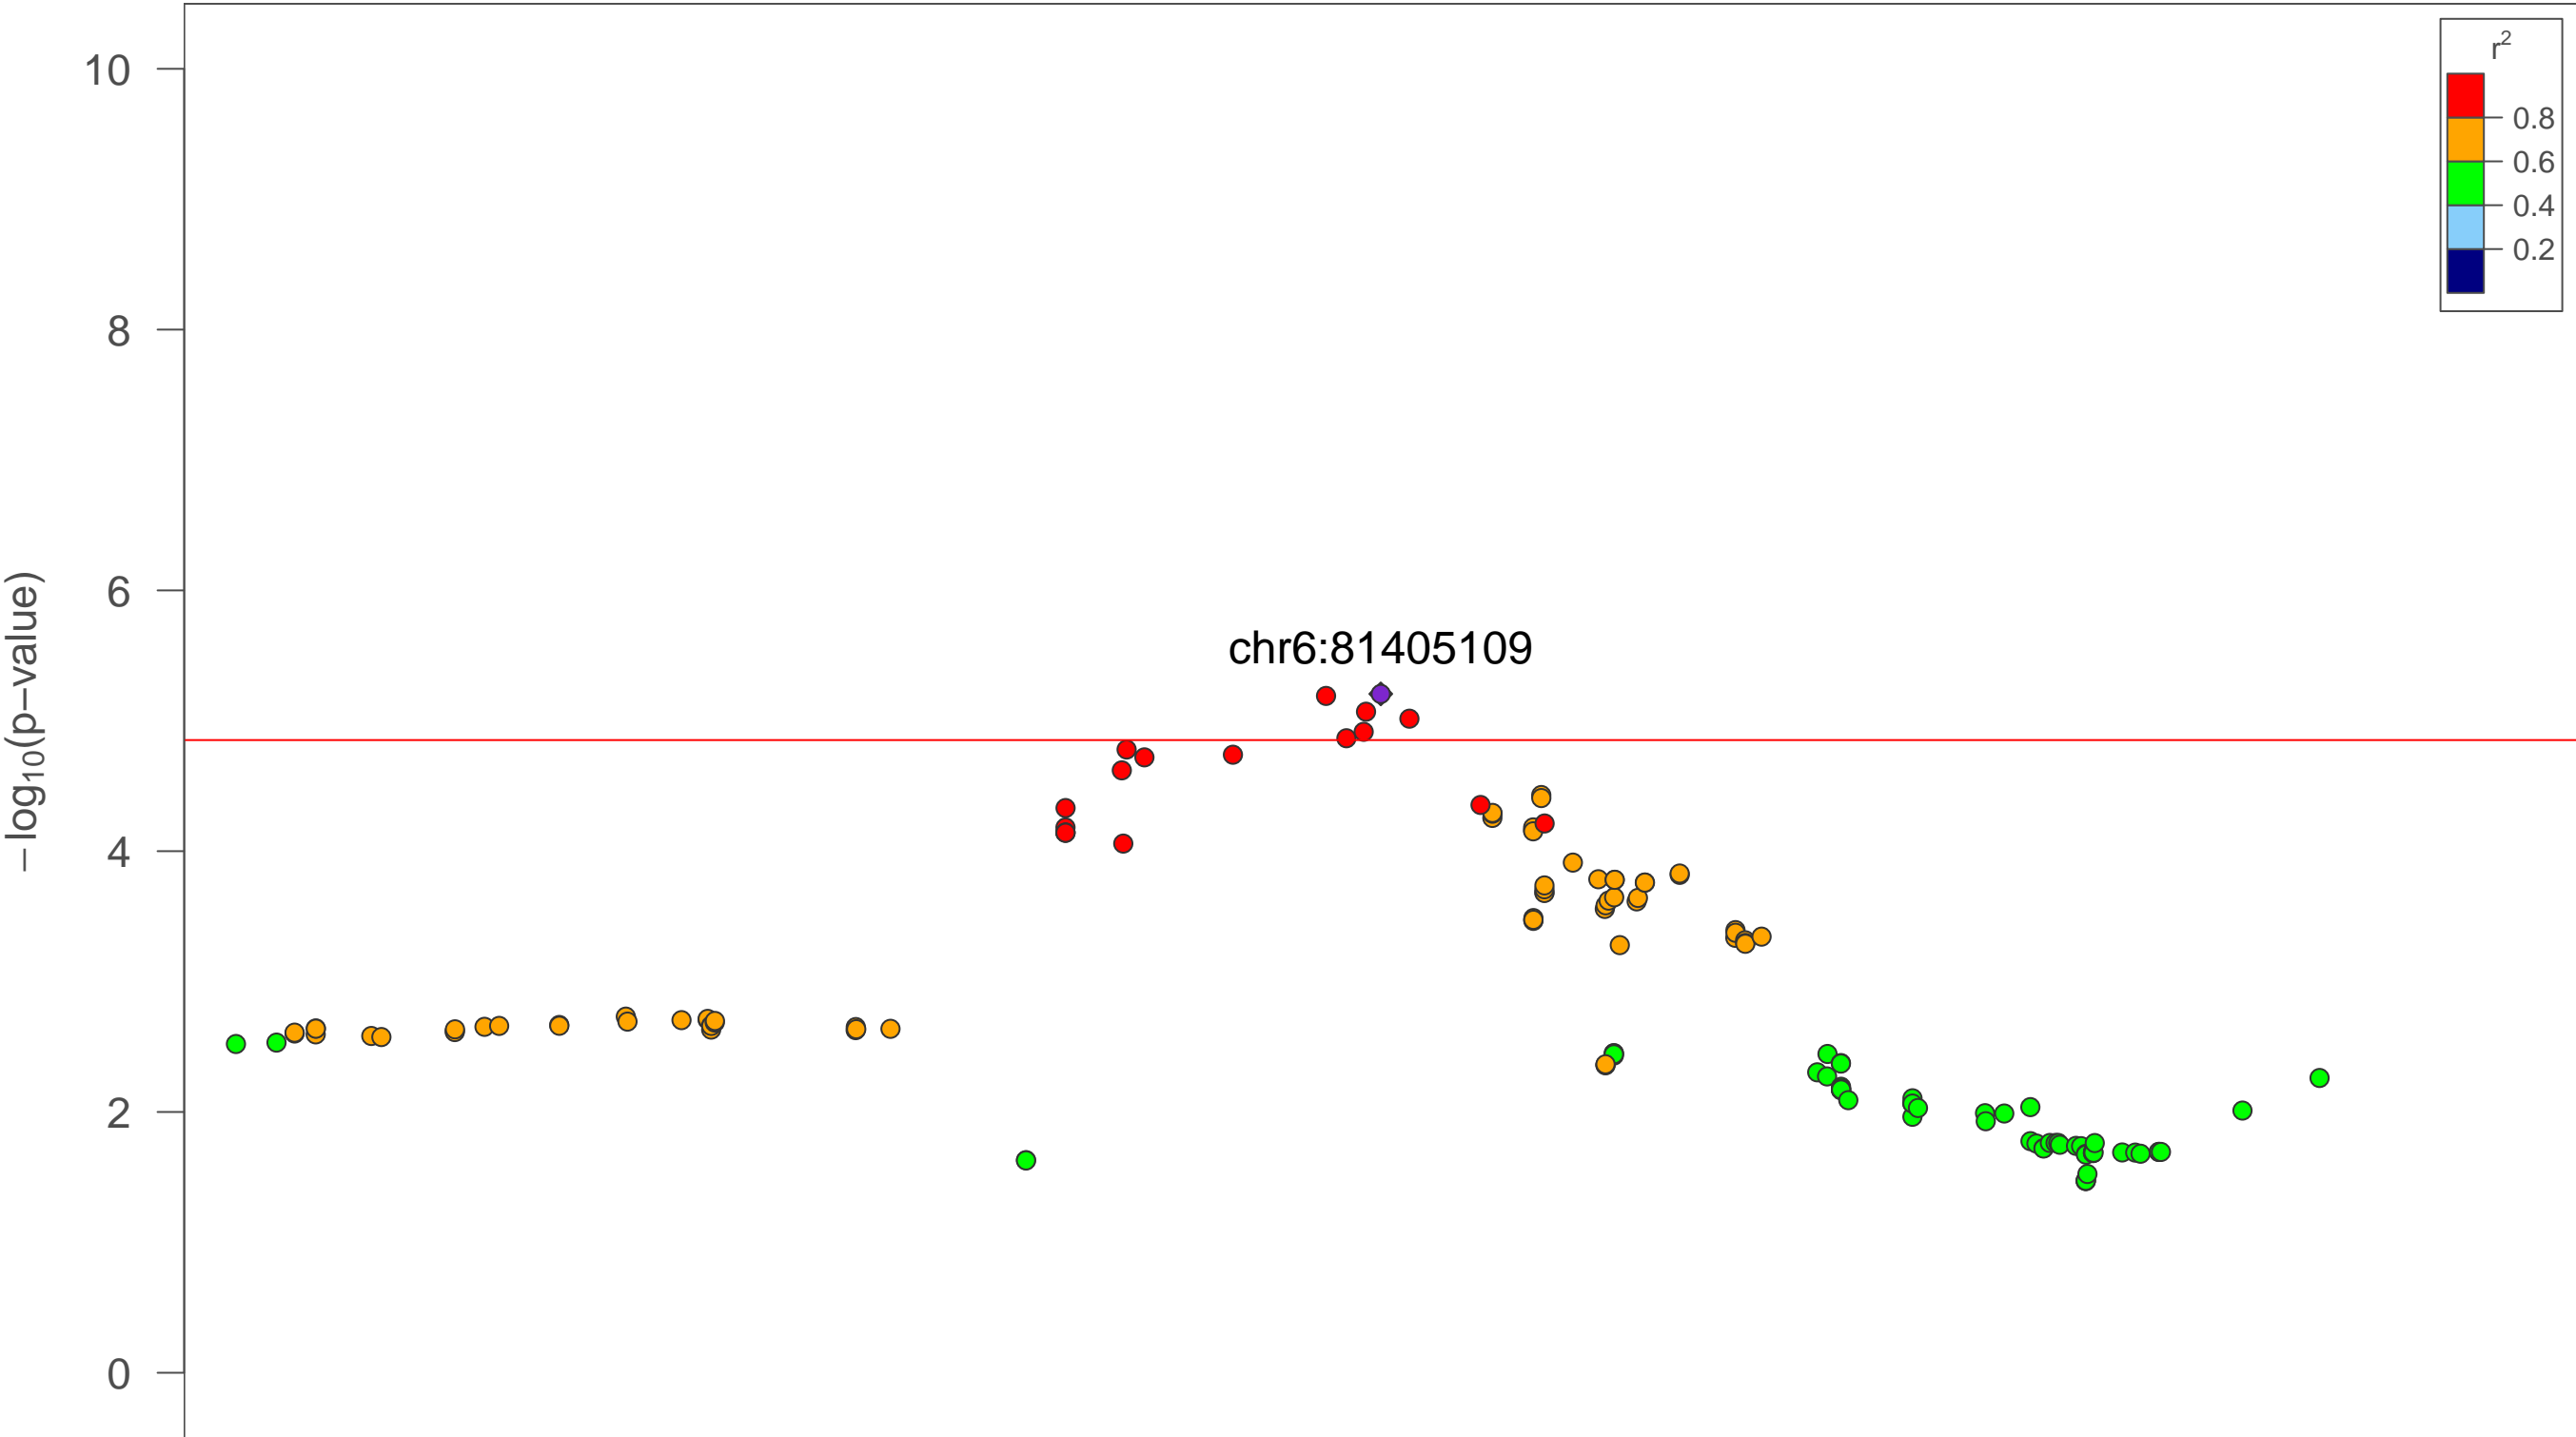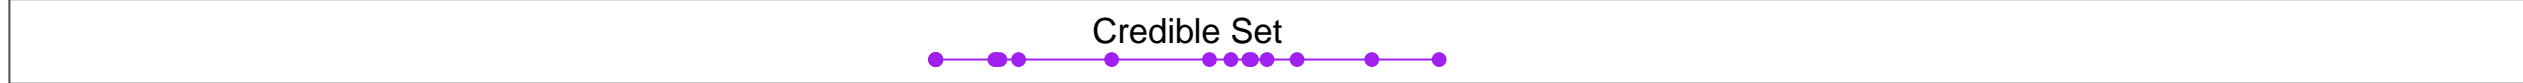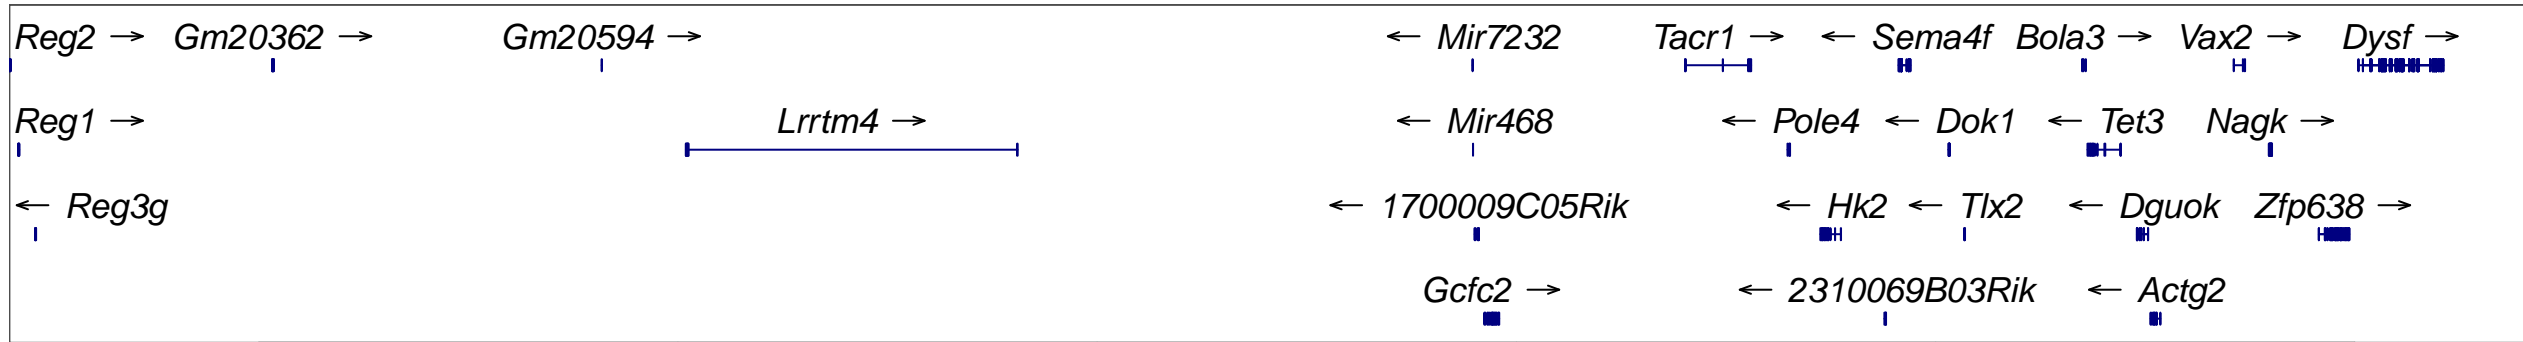

36 genes  
omitted

date: Tue Sep 17 12:15:30 2019  
build: F34GBS  
display range: chr6:78405109–84405109 [78405109–84405109]  
hilite range: 0 – 0 [ 0 – 0 ]  
reference SNP: chr6:81405109  
number of SNPs plotted: 147  
min P-value: 6.22E–6 [chr6:81405109]  
max P-value: 3.39E–2 [chr6:83172379]  
omitted Genes: Mrpl19, Eva1a, M1ap  
omitted Genes: Loxl3, Mir7040, Htra2  
omitted Genes: Aup1, Dqx1, Pcgf1  
omitted Genes: Lbx2, Mir3470a, Ccdc142  
omitted Genes: Mrpl53, Mogs, Wbp1  
omitted Genes: Ino80b, Rtkn, Wdr54  
omitted Genes: 1700003E16Rik, Dctn1, Slc4a5  
omitted Genes: Mthfd2, Mob1a, Mir6374  
omitted Genes: B230319C09Rik, Stambp, Gm21284  
omitted Genes: Clec4f, Cd207, Vax2os  
omitted Genes: Atp6v1b1, 1700124L16Rik, Ankrd53  
omitted Genes: Tex261, Gm7443, Paip2b



Fine-mapping Regions

| snp           | chr | pos (Mb) | pp         | group        | color  |
|---------------|-----|----------|------------|--------------|--------|
| chr6:80614710 | 6   | 80.61471 | 0.01598174 | Credible Set | purple |
| chr6:80614725 | 6   | 80.61473 | 0.01462716 | Credible Set | purple |
| chr6:80614740 | 6   | 80.61474 | 0.01468902 | Credible Set | purple |
| chr6:80614750 | 6   | 80.61475 | 0.01462716 | Credible Set | purple |
| chr6:80614907 | 6   | 80.61491 | 0.02212035 | Credible Set | purple |
| chr6:80755939 | 6   | 80.75594 | 0.04162389 | Credible Set | purple |
| chr6:80759589 | 6   | 80.75959 | 0.01220744 | Credible Set | purple |
| chr6:80767933 | 6   | 80.76793 | 0.05907562 | Credible Set | purple |
| chr6:80812582 | 6   | 80.81258 | 0.05177016 | Credible Set | purple |
| chr6:81034488 | 6   | 81.03449 | 0.05412722 | Credible Set | purple |
| chr6:81267890 | 6   | 81.26789 | 0.14586070 | Credible Set | purple |
| chr6:81318989 | 6   | 81.31899 | 0.07142104 | Credible Set | purple |
| chr6:81362217 | 6   | 81.36222 | 0.07960154 | Credible Set | purple |
| chr6:81368112 | 6   | 81.36811 | 0.11174636 | Credible Set | purple |
| chr6:81405109 | 6   | 81.40511 | 0.15081646 | Credible Set | purple |
| chr6:81476902 | 6   | 81.47690 | 0.09933430 | Credible Set | purple |
| chr6:81655195 | 6   | 81.65520 | 0.02328372 | Credible Set | purple |
| chr6:81815817 | 6   | 81.81582 | 0.01708610 | Credible Set | purple |

# F34 GBS, QT body weight

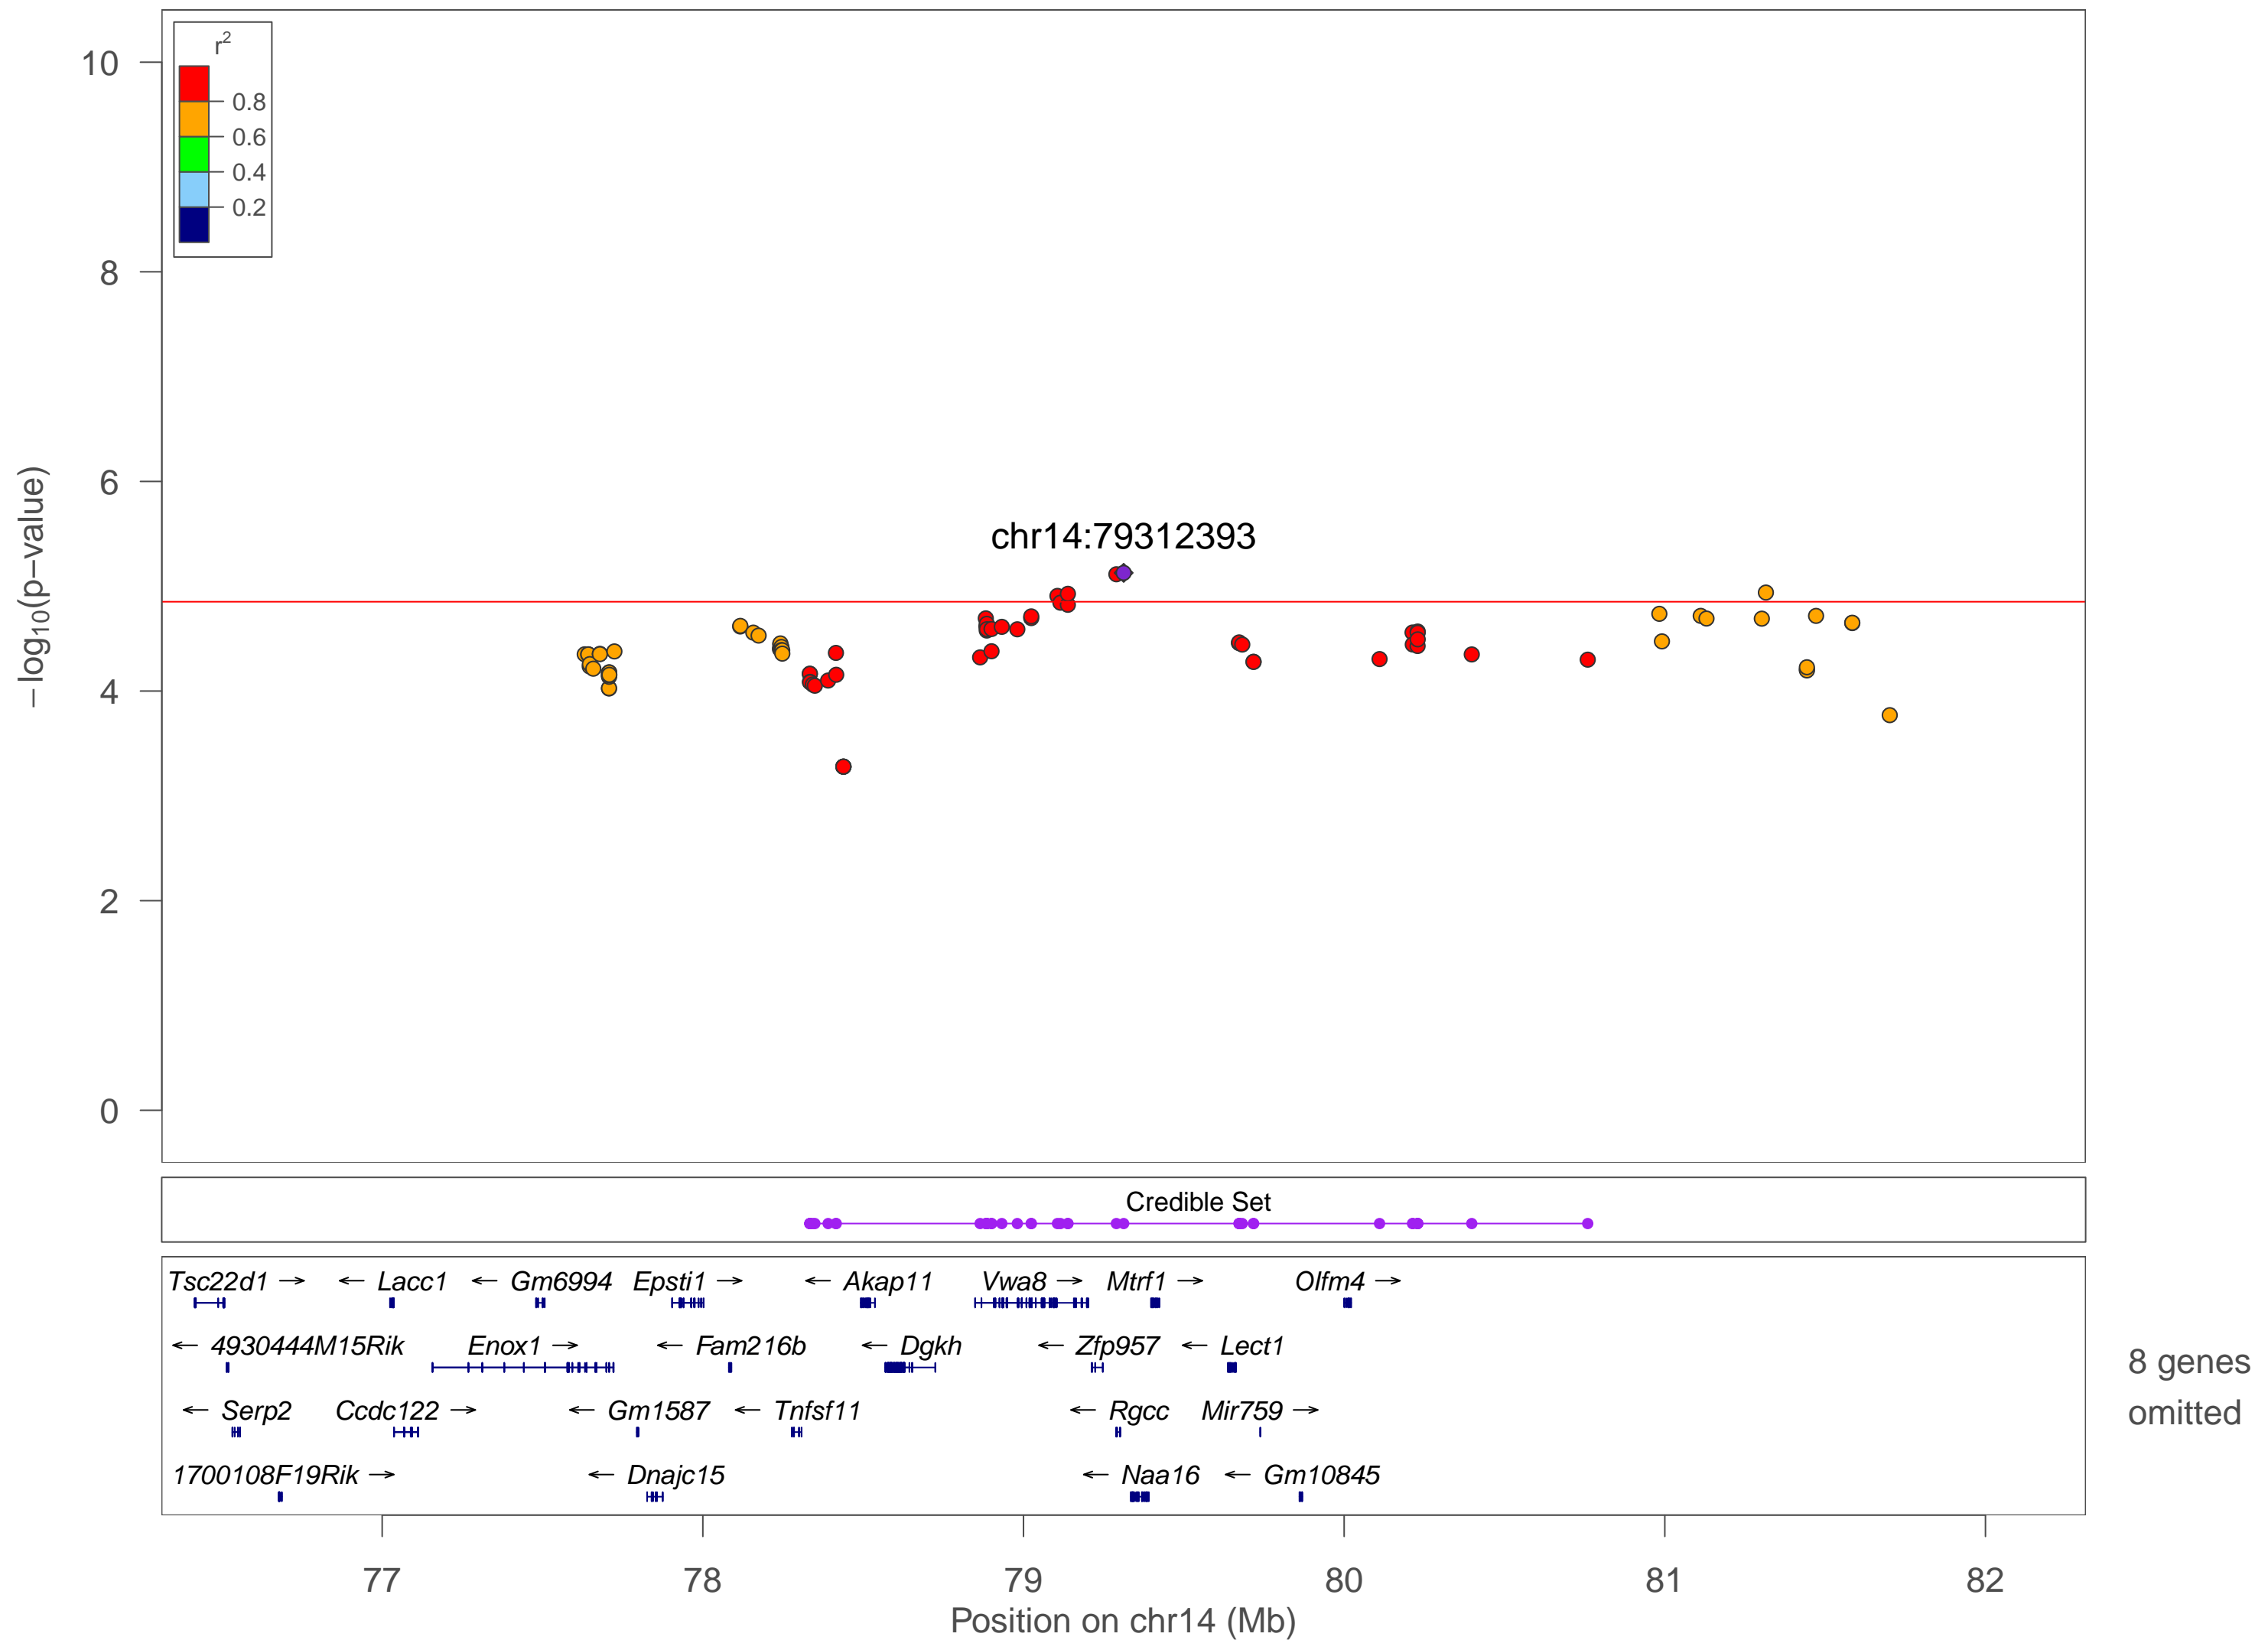

date: Tue Sep 17 12:15:37 2019

build: F34GBS

display range: chr14:76312393–82312393 [76312393–82312393]

hilite range: 0 – 0 [ 0 – 0 ]

reference SNP: chr14:79312393

number of SNPs plotted: 90

min P-value: 7.45E–6 [chr14:79312393]

max P-value: 5.27E–4 [chr14:78438397]

omitted Genes: Mir1971, Kbtbd7, Kbtbd6

omitted Genes: Wbp4, Elf1, Sugt1

omitted Genes: 4930452G13Rik, Pcdh8

## Fine-mapping Regions

| snp            | chr | pos (Mb) | pp          | group        | color  |
|----------------|-----|----------|-------------|--------------|--------|
| chr14:78333693 | 14  | 78.33369 | 0.009736836 | Credible Set | purple |
| chr14:78333727 | 14  | 78.33373 | 0.009757823 | Credible Set | purple |
| chr14:78334235 | 14  | 78.33424 | 0.008241041 | Credible Set | purple |
| chr14:78334352 | 14  | 78.33435 | 0.008179089 | Credible Set | purple |
| chr14:78342935 | 14  | 78.34293 | 0.007796679 | Credible Set | purple |
| chr14:78349294 | 14  | 78.34929 | 0.007611153 | Credible Set | purple |
| chr14:78390714 | 14  | 78.39071 | 0.008475172 | Credible Set | purple |
| chr14:78415035 | 14  | 78.41504 | 0.015052412 | Credible Set | purple |
| chr14:78415900 | 14  | 78.41590 | 0.009551020 | Credible Set | purple |
| chr14:78864748 | 14  | 78.86475 | 0.013714030 | Credible Set | purple |
| chr14:78882395 | 14  | 78.88240 | 0.030962917 | Credible Set | purple |
| chr14:78884278 | 14  | 78.88428 | 0.026168306 | Credible Set | purple |
| chr14:78885403 | 14  | 78.88540 | 0.024016891 | Credible Set | purple |
| chr14:78885542 | 14  | 78.88554 | 0.027637951 | Credible Set | purple |
| chr14:78885909 | 14  | 78.88591 | 0.024689942 | Credible Set | purple |
| chr14:78900265 | 14  | 78.90027 | 0.015581625 | Credible Set | purple |
| chr14:78900272 | 14  | 78.90027 | 0.024780263 | Credible Set | purple |
| chr14:78932384 | 14  | 78.93238 | 0.025942948 | Credible Set | purple |
| chr14:78980736 | 14  | 78.98074 | 0.024638346 | Credible Set | purple |
| chr14:79024151 | 14  | 79.02415 | 0.031153636 | Credible Set | purple |
| chr14:79024207 | 14  | 79.02421 | 0.032275634 | Credible Set | purple |
| chr14:79105928 | 14  | 79.10593 | 0.049575651 | Credible Set | purple |
| chr14:79115207 | 14  | 79.11521 | 0.043003580 | Credible Set | purple |
| chr14:79138261 | 14  | 79.13826 | 0.041142709 | Credible Set | purple |
| chr14:79138486 | 14  | 79.13849 | 0.051797878 | Credible Set | purple |
| chr14:79289663 | 14  | 79.28966 | 0.078037680 | Credible Set | purple |
| chr14:79312393 | 14  | 79.31239 | 0.080352681 | Credible Set | purple |
| chr14:79672373 | 14  | 79.67237 | 0.018570303 | Credible Set | purple |
| chr14:79672387 | 14  | 79.67239 | 0.018479544 | Credible Set | purple |
| chr14:79672589 | 14  | 79.67259 | 0.018736116 | Credible Set | purple |
| chr14:79682220 | 14  | 79.68222 | 0.017917803 | Credible Set | purple |
| chr14:79717330 | 14  | 79.71733 | 0.012518788 | Credible Set | purple |
| chr14:79717420 | 14  | 79.71742 | 0.012480112 | Credible Set | purple |
| chr14:80110393 | 14  | 80.11039 | 0.013236302 | Credible Set | purple |
| chr14:80213369 | 14  | 80.21337 | 0.023028068 | Credible Set | purple |
| chr14:80214058 | 14  | 80.21406 | 0.017941184 | Credible Set | purple |

Fine-mapping Regions

| snp            | chr | pos (Mb) | pp         | group        | color  |
|----------------|-----|----------|------------|--------------|--------|
| chr14:80228969 | 14  | 80.22897 | 0.01739179 | Credible Set | purple |
| chr14:80229277 | 14  | 80.22928 | 0.02350404 | Credible Set | purple |
| chr14:80229281 | 14  | 80.22928 | 0.02296019 | Credible Set | purple |
| chr14:80229399 | 14  | 80.22940 | 0.01996628 | Credible Set | purple |
| chr14:80397940 | 14  | 80.39794 | 0.01458523 | Credible Set | purple |
| chr14:80759627 | 14  | 80.75963 | 0.01307705 | Credible Set | purple |

F34 GBS, QT locomotor test day 1, total distance travelled in 30min (cm)

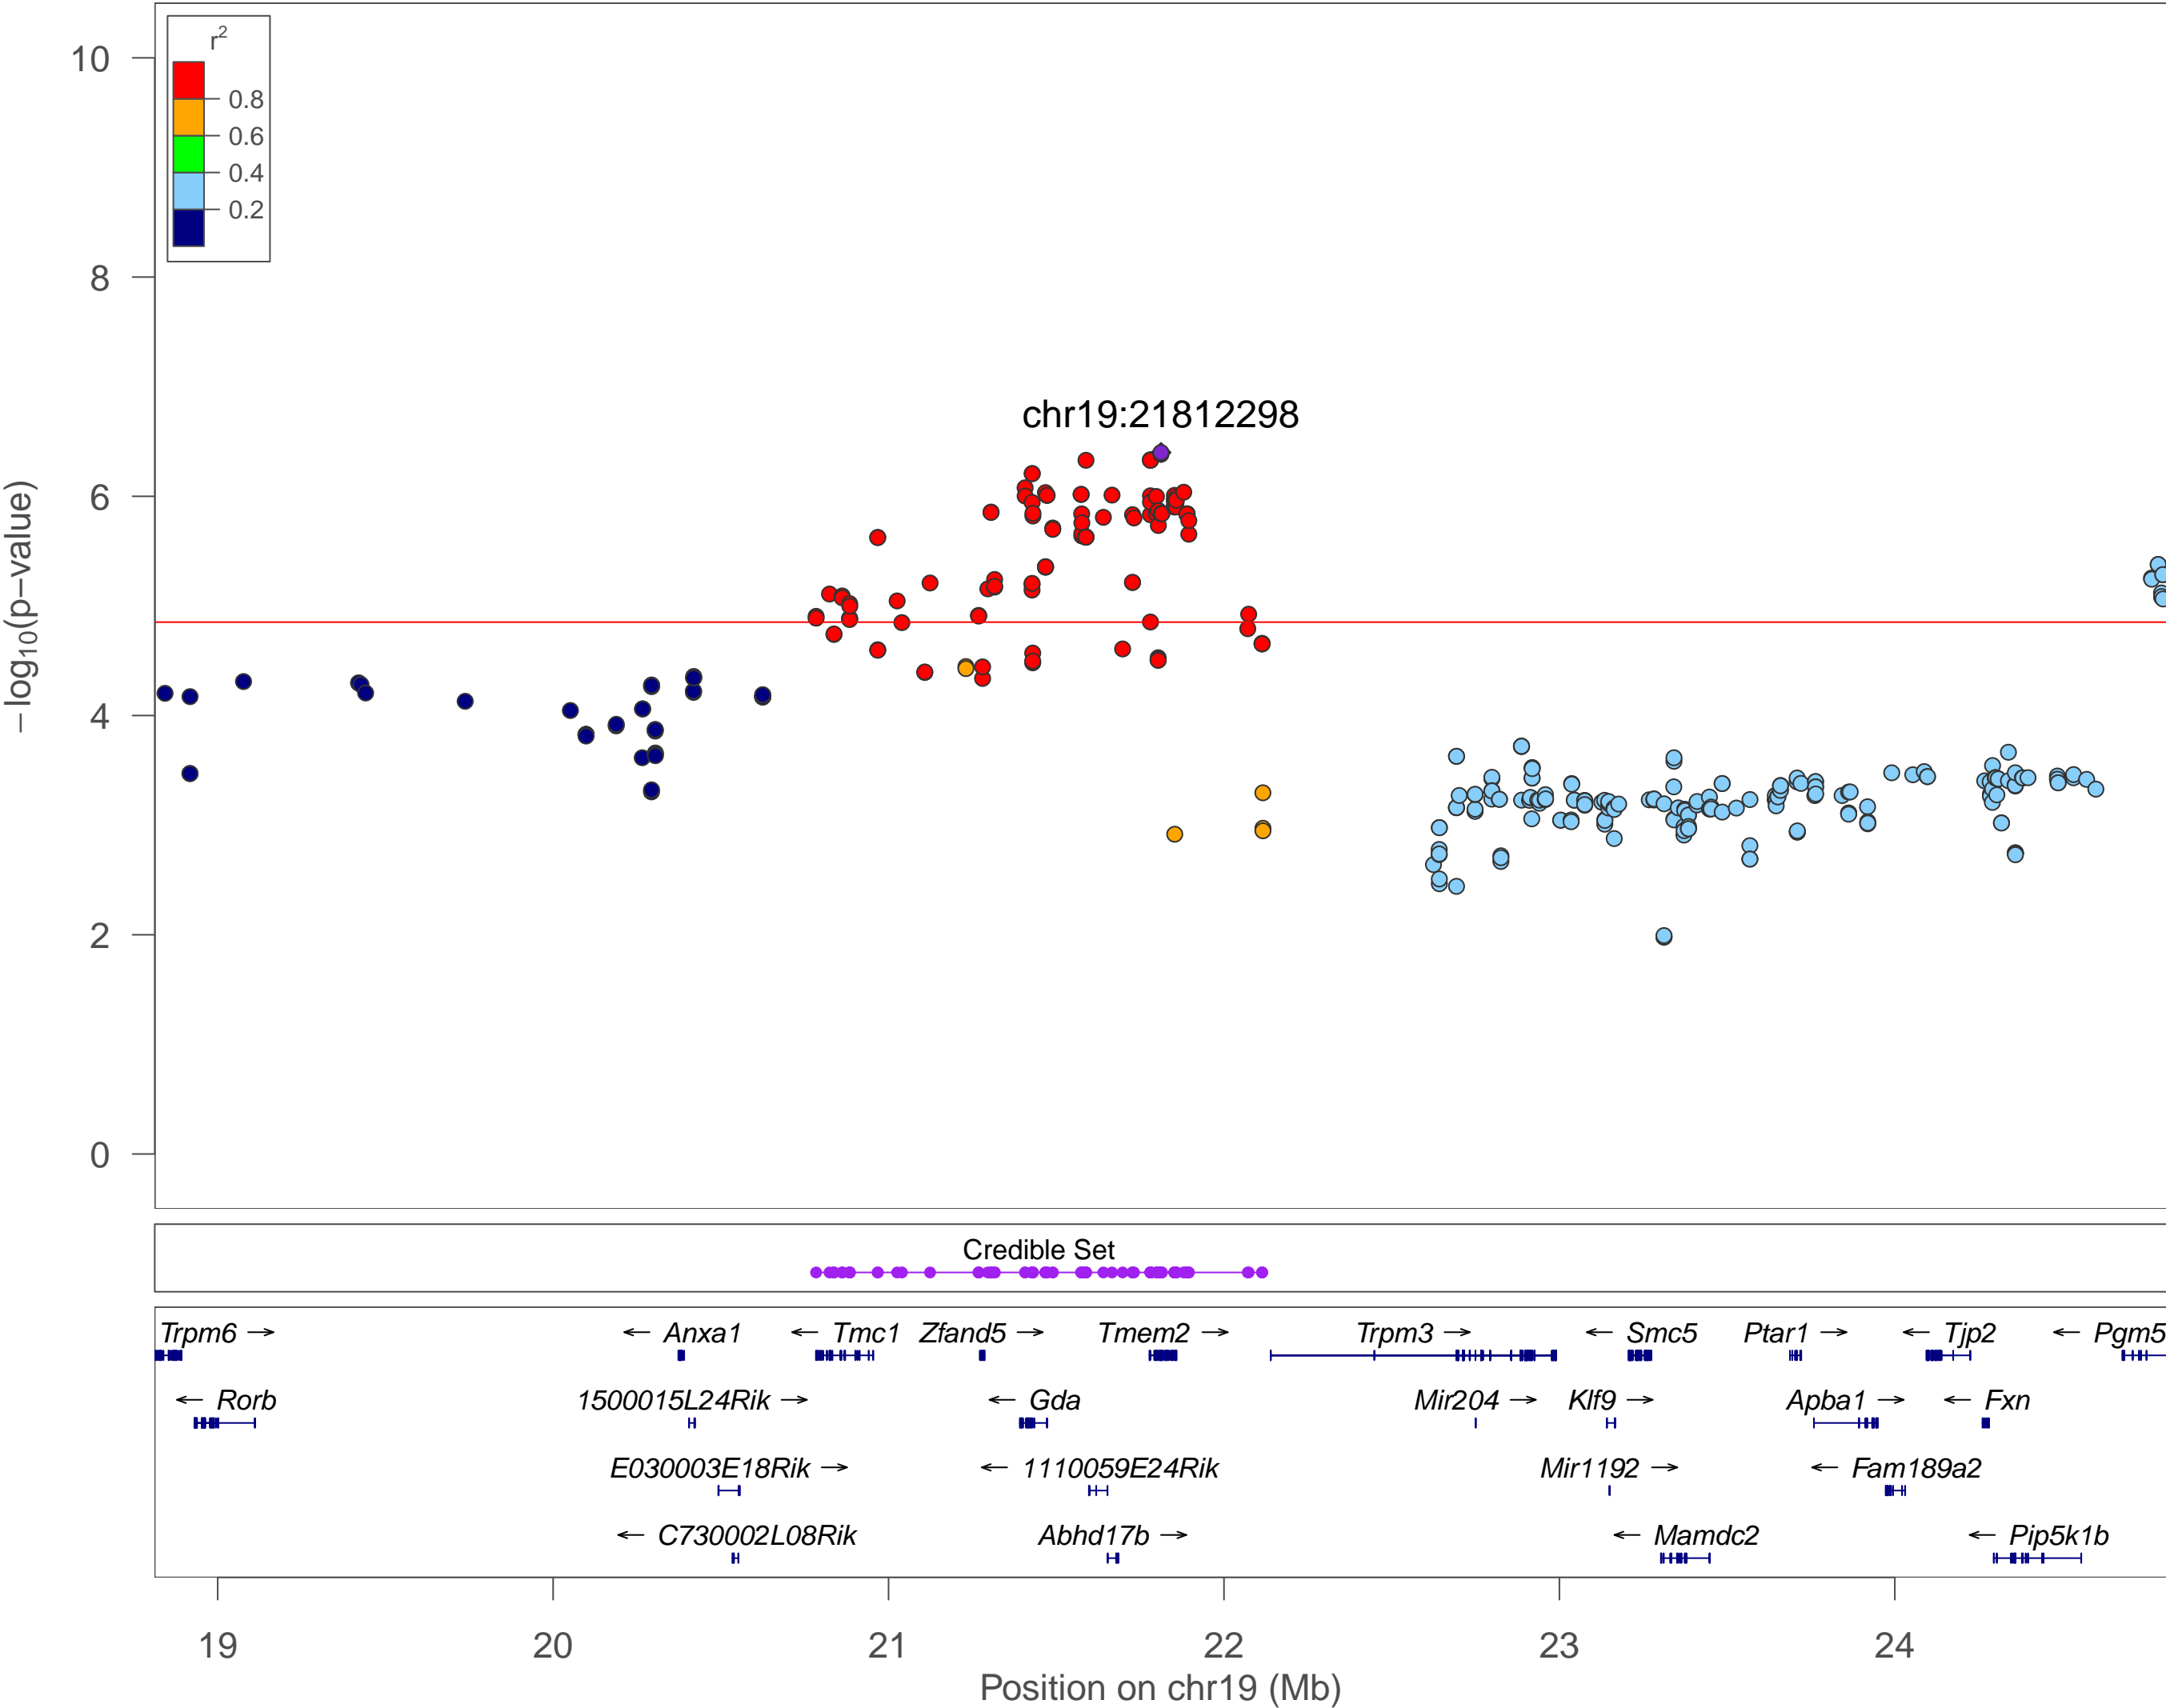

date: Thu Sep 12 15:18:00 2019

build: F34GBS

display range: chr19:18812298–24812298 [18812298–24812298]

hilite range: 0 – 0 [ 0 – 0 ]

reference SNP: chr19:21812298

number of SNPs plotted: 371

min P-value: 3.98E–7 [chr19:21812298]

max P-value: 1.05E–2 [chr19:23311837]

omitted Genes: Aldh1a1, Aldh1a7, 4930554I06Rik

omitted Genes: 1700028P14Rik, Fam122a, Tmem252

## Fine-mapping Regions

| snp            | chr | pos (Mb) | pp           | group        | color  |
|----------------|-----|----------|--------------|--------------|--------|
| chr19:20784050 | 19  | 20.78405 | 0.0008575744 | Credible Set | purple |
| chr19:20824062 | 19  | 20.82406 | 0.0017631532 | Credible Set | purple |
| chr19:20837340 | 19  | 20.83734 | 0.0008477193 | Credible Set | purple |
| chr19:20837342 | 19  | 20.83734 | 0.0008550116 | Credible Set | purple |
| chr19:20861811 | 19  | 20.86181 | 0.0017989964 | Credible Set | purple |
| chr19:20861821 | 19  | 20.86182 | 0.0017635560 | Credible Set | purple |
| chr19:20883962 | 19  | 20.88396 | 0.0014192917 | Credible Set | purple |
| chr19:20883975 | 19  | 20.88397 | 0.0009483827 | Credible Set | purple |
| chr19:20883979 | 19  | 20.88398 | 0.0009443153 | Credible Set | purple |
| chr19:20883980 | 19  | 20.88398 | 0.0009357623 | Credible Set | purple |
| chr19:20884530 | 19  | 20.88453 | 0.0013516529 | Credible Set | purple |
| chr19:20967742 | 19  | 20.96774 | 0.0048671332 | Credible Set | purple |
| chr19:20967772 | 19  | 20.96777 | 0.0048468227 | Credible Set | purple |
| chr19:21025668 | 19  | 21.02567 | 0.0015561525 | Credible Set | purple |
| chr19:21039744 | 19  | 21.03974 | 0.0011386689 | Credible Set | purple |
| chr19:21123769 | 19  | 21.12377 | 0.0026073988 | Credible Set | purple |
| chr19:21268525 | 19  | 21.26853 | 0.0014289010 | Credible Set | purple |
| chr19:21268527 | 19  | 21.26853 | 0.0014233889 | Credible Set | purple |
| chr19:21268550 | 19  | 21.26855 | 0.0014171209 | Credible Set | purple |
| chr19:21296098 | 19  | 21.29610 | 0.0020595921 | Credible Set | purple |
| chr19:21305518 | 19  | 21.30552 | 0.0094310297 | Credible Set | purple |
| chr19:21305568 | 19  | 21.30557 | 0.0093437328 | Credible Set | purple |
| chr19:21316234 | 19  | 21.31623 | 0.0024708025 | Credible Set | purple |
| chr19:21316268 | 19  | 21.31627 | 0.0021016489 | Credible Set | purple |
| chr19:21316305 | 19  | 21.31630 | 0.0021428589 | Credible Set | purple |
| chr19:21407108 | 19  | 21.40711 | 0.0171505129 | Credible Set | purple |
| chr19:21407182 | 19  | 21.40718 | 0.0152360325 | Credible Set | purple |
| chr19:21427800 | 19  | 21.42780 | 0.0030679701 | Credible Set | purple |
| chr19:21427805 | 19  | 21.42780 | 0.0027185817 | Credible Set | purple |
| chr19:21427851 | 19  | 21.42785 | 0.0031361135 | Credible Set | purple |
| chr19:21428151 | 19  | 21.42815 | 0.0132551245 | Credible Set | purple |
| chr19:21428338 | 19  | 21.42834 | 0.0212974817 | Credible Set | purple |
| chr19:21428343 | 19  | 21.42834 | 0.0212974817 | Credible Set | purple |
| chr19:21429788 | 19  | 21.42979 | 0.0008538701 | Credible Set | purple |
| chr19:21430361 | 19  | 21.43036 | 0.0093972193 | Credible Set | purple |
| chr19:21430412 | 19  | 21.43041 | 0.0098977365 | Credible Set | purple |



## Fine-mapping Regions

| snp            | chr | pos (Mb) | pp          | group        | color  |
|----------------|-----|----------|-------------|--------------|--------|
| chr19:21467882 | 19  | 21.46788 | 0.015916999 | Credible Set | purple |
| chr19:21467967 | 19  | 21.46797 | 0.003881881 | Credible Set | purple |
| chr19:21467982 | 19  | 21.46798 | 0.003848132 | Credible Set | purple |
| chr19:21467985 | 19  | 21.46798 | 0.003848132 | Credible Set | purple |
| chr19:21467987 | 19  | 21.46799 | 0.003864992 | Credible Set | purple |
| chr19:21472509 | 19  | 21.47251 | 0.015753988 | Credible Set | purple |
| chr19:21472526 | 19  | 21.47253 | 0.015736656 | Credible Set | purple |
| chr19:21489550 | 19  | 21.48955 | 0.007944807 | Credible Set | purple |
| chr19:21489579 | 19  | 21.48958 | 0.007768965 | Credible Set | purple |
| chr19:21574198 | 19  | 21.57420 | 0.015664155 | Credible Set | purple |
| chr19:21574202 | 19  | 21.57420 | 0.015711862 | Credible Set | purple |
| chr19:21575782 | 19  | 21.57578 | 0.010887006 | Credible Set | purple |
| chr19:21576364 | 19  | 21.57636 | 0.006823849 | Credible Set | purple |
| chr19:21576365 | 19  | 21.57636 | 0.007376882 | Credible Set | purple |
| chr19:21576374 | 19  | 21.57637 | 0.009225902 | Credible Set | purple |
| chr19:21588462 | 19  | 21.58846 | 0.006900006 | Credible Set | purple |
| chr19:21588470 | 19  | 21.58847 | 0.006915342 | Credible Set | purple |
| chr19:21588527 | 19  | 21.58853 | 0.006932985 | Credible Set | purple |
| chr19:21588528 | 19  | 21.58853 | 0.006909748 | Credible Set | purple |
| chr19:21588608 | 19  | 21.58861 | 0.033306155 | Credible Set | purple |
| chr19:21640403 | 19  | 21.64040 | 0.010152296 | Credible Set | purple |
| chr19:21666239 | 19  | 21.66624 | 0.015131543 | Credible Set | purple |
| chr19:21697884 | 19  | 21.69788 | 0.001092607 | Credible Set | purple |
| chr19:21727318 | 19  | 21.72732 | 0.003843232 | Credible Set | purple |
| chr19:21727391 | 19  | 21.72739 | 0.003849484 | Credible Set | purple |
| chr19:21727561 | 19  | 21.72756 | 0.011568827 | Credible Set | purple |
| chr19:21731633 | 19  | 21.73163 | 0.009253184 | Credible Set | purple |
| chr19:21780788 | 19  | 21.78079 | 0.010749976 | Credible Set | purple |
| chr19:21780850 | 19  | 21.78085 | 0.001195091 | Credible Set | purple |
| chr19:21780922 | 19  | 21.78092 | 0.030944937 | Credible Set | purple |
| chr19:21780928 | 19  | 21.78093 | 0.031035982 | Credible Set | purple |
| chr19:21780934 | 19  | 21.78093 | 0.030765141 | Credible Set | purple |
| chr19:21780935 | 19  | 21.78093 | 0.030765141 | Credible Set | purple |
| chr19:21781005 | 19  | 21.78101 | 0.015622049 | Credible Set | purple |
| chr19:21781019 | 19  | 21.78102 | 0.013312350 | Credible Set | purple |
| chr19:21798450 | 19  | 21.79845 | 0.011426543 | Credible Set | purple |

## Fine-mapping Regions

| snp            | chr | pos (Mb) | pp           | group        | color  |
|----------------|-----|----------|--------------|--------------|--------|
| chr19:21798541 | 19  | 21.79854 | 0.0148347311 | Credible Set | purple |
| chr19:21804356 | 19  | 21.80436 | 0.0087286799 | Credible Set | purple |
| chr19:21804420 | 19  | 21.80442 | 0.0117585684 | Credible Set | purple |
| chr19:21804582 | 19  | 21.80458 | 0.0117048301 | Credible Set | purple |
| chr19:21812258 | 19  | 21.81226 | 0.0433759596 | Credible Set | purple |
| chr19:21812298 | 19  | 21.81230 | 0.0449085516 | Credible Set | purple |
| chr19:21812594 | 19  | 21.81259 | 0.0110099016 | Credible Set | purple |
| chr19:21814790 | 19  | 21.81479 | 0.0115511008 | Credible Set | purple |
| chr19:21814806 | 19  | 21.81481 | 0.0114467944 | Credible Set | purple |
| chr19:21851795 | 19  | 21.85179 | 0.0135051504 | Credible Set | purple |
| chr19:21852236 | 19  | 21.85224 | 0.0115738553 | Credible Set | purple |
| chr19:21852273 | 19  | 21.85227 | 0.0119862730 | Credible Set | purple |
| chr19:21852296 | 19  | 21.85230 | 0.0144178984 | Credible Set | purple |
| chr19:21857059 | 19  | 21.85706 | 0.0121471605 | Credible Set | purple |
| chr19:21857128 | 19  | 21.85713 | 0.0113671320 | Credible Set | purple |
| chr19:21857704 | 19  | 21.85770 | 0.0132910933 | Credible Set | purple |
| chr19:21857707 | 19  | 21.85771 | 0.0132159157 | Credible Set | purple |
| chr19:21880097 | 19  | 21.88010 | 0.0148131804 | Credible Set | purple |
| chr19:21889764 | 19  | 21.88976 | 0.0110062165 | Credible Set | purple |
| chr19:21889768 | 19  | 21.88977 | 0.0109696553 | Credible Set | purple |
| chr19:21889777 | 19  | 21.88978 | 0.0110062165 | Credible Set | purple |
| chr19:21889831 | 19  | 21.88983 | 0.0110444924 | Credible Set | purple |
| chr19:21889832 | 19  | 21.88983 | 0.0110861872 | Credible Set | purple |
| chr19:21889838 | 19  | 21.88984 | 0.0110388679 | Credible Set | purple |
| chr19:21895163 | 19  | 21.89516 | 0.0067982382 | Credible Set | purple |
| chr19:21895174 | 19  | 21.89517 | 0.0119068788 | Credible Set | purple |
| chr19:22070939 | 19  | 22.07094 | 0.0013923552 | Credible Set | purple |
| chr19:22073618 | 19  | 22.07362 | 0.0017489510 | Credible Set | purple |
| chr19:22113626 | 19  | 22.11363 | 0.0009938296 | Credible Set | purple |
| chr19:22113628 | 19  | 22.11363 | 0.0009799201 | Credible Set | purple |
| chr19:22113687 | 19  | 22.11369 | 0.0009804823 | Credible Set | purple |

F34 GBS, QT locomotor test day 2, total distance travelled in 30min (cm)

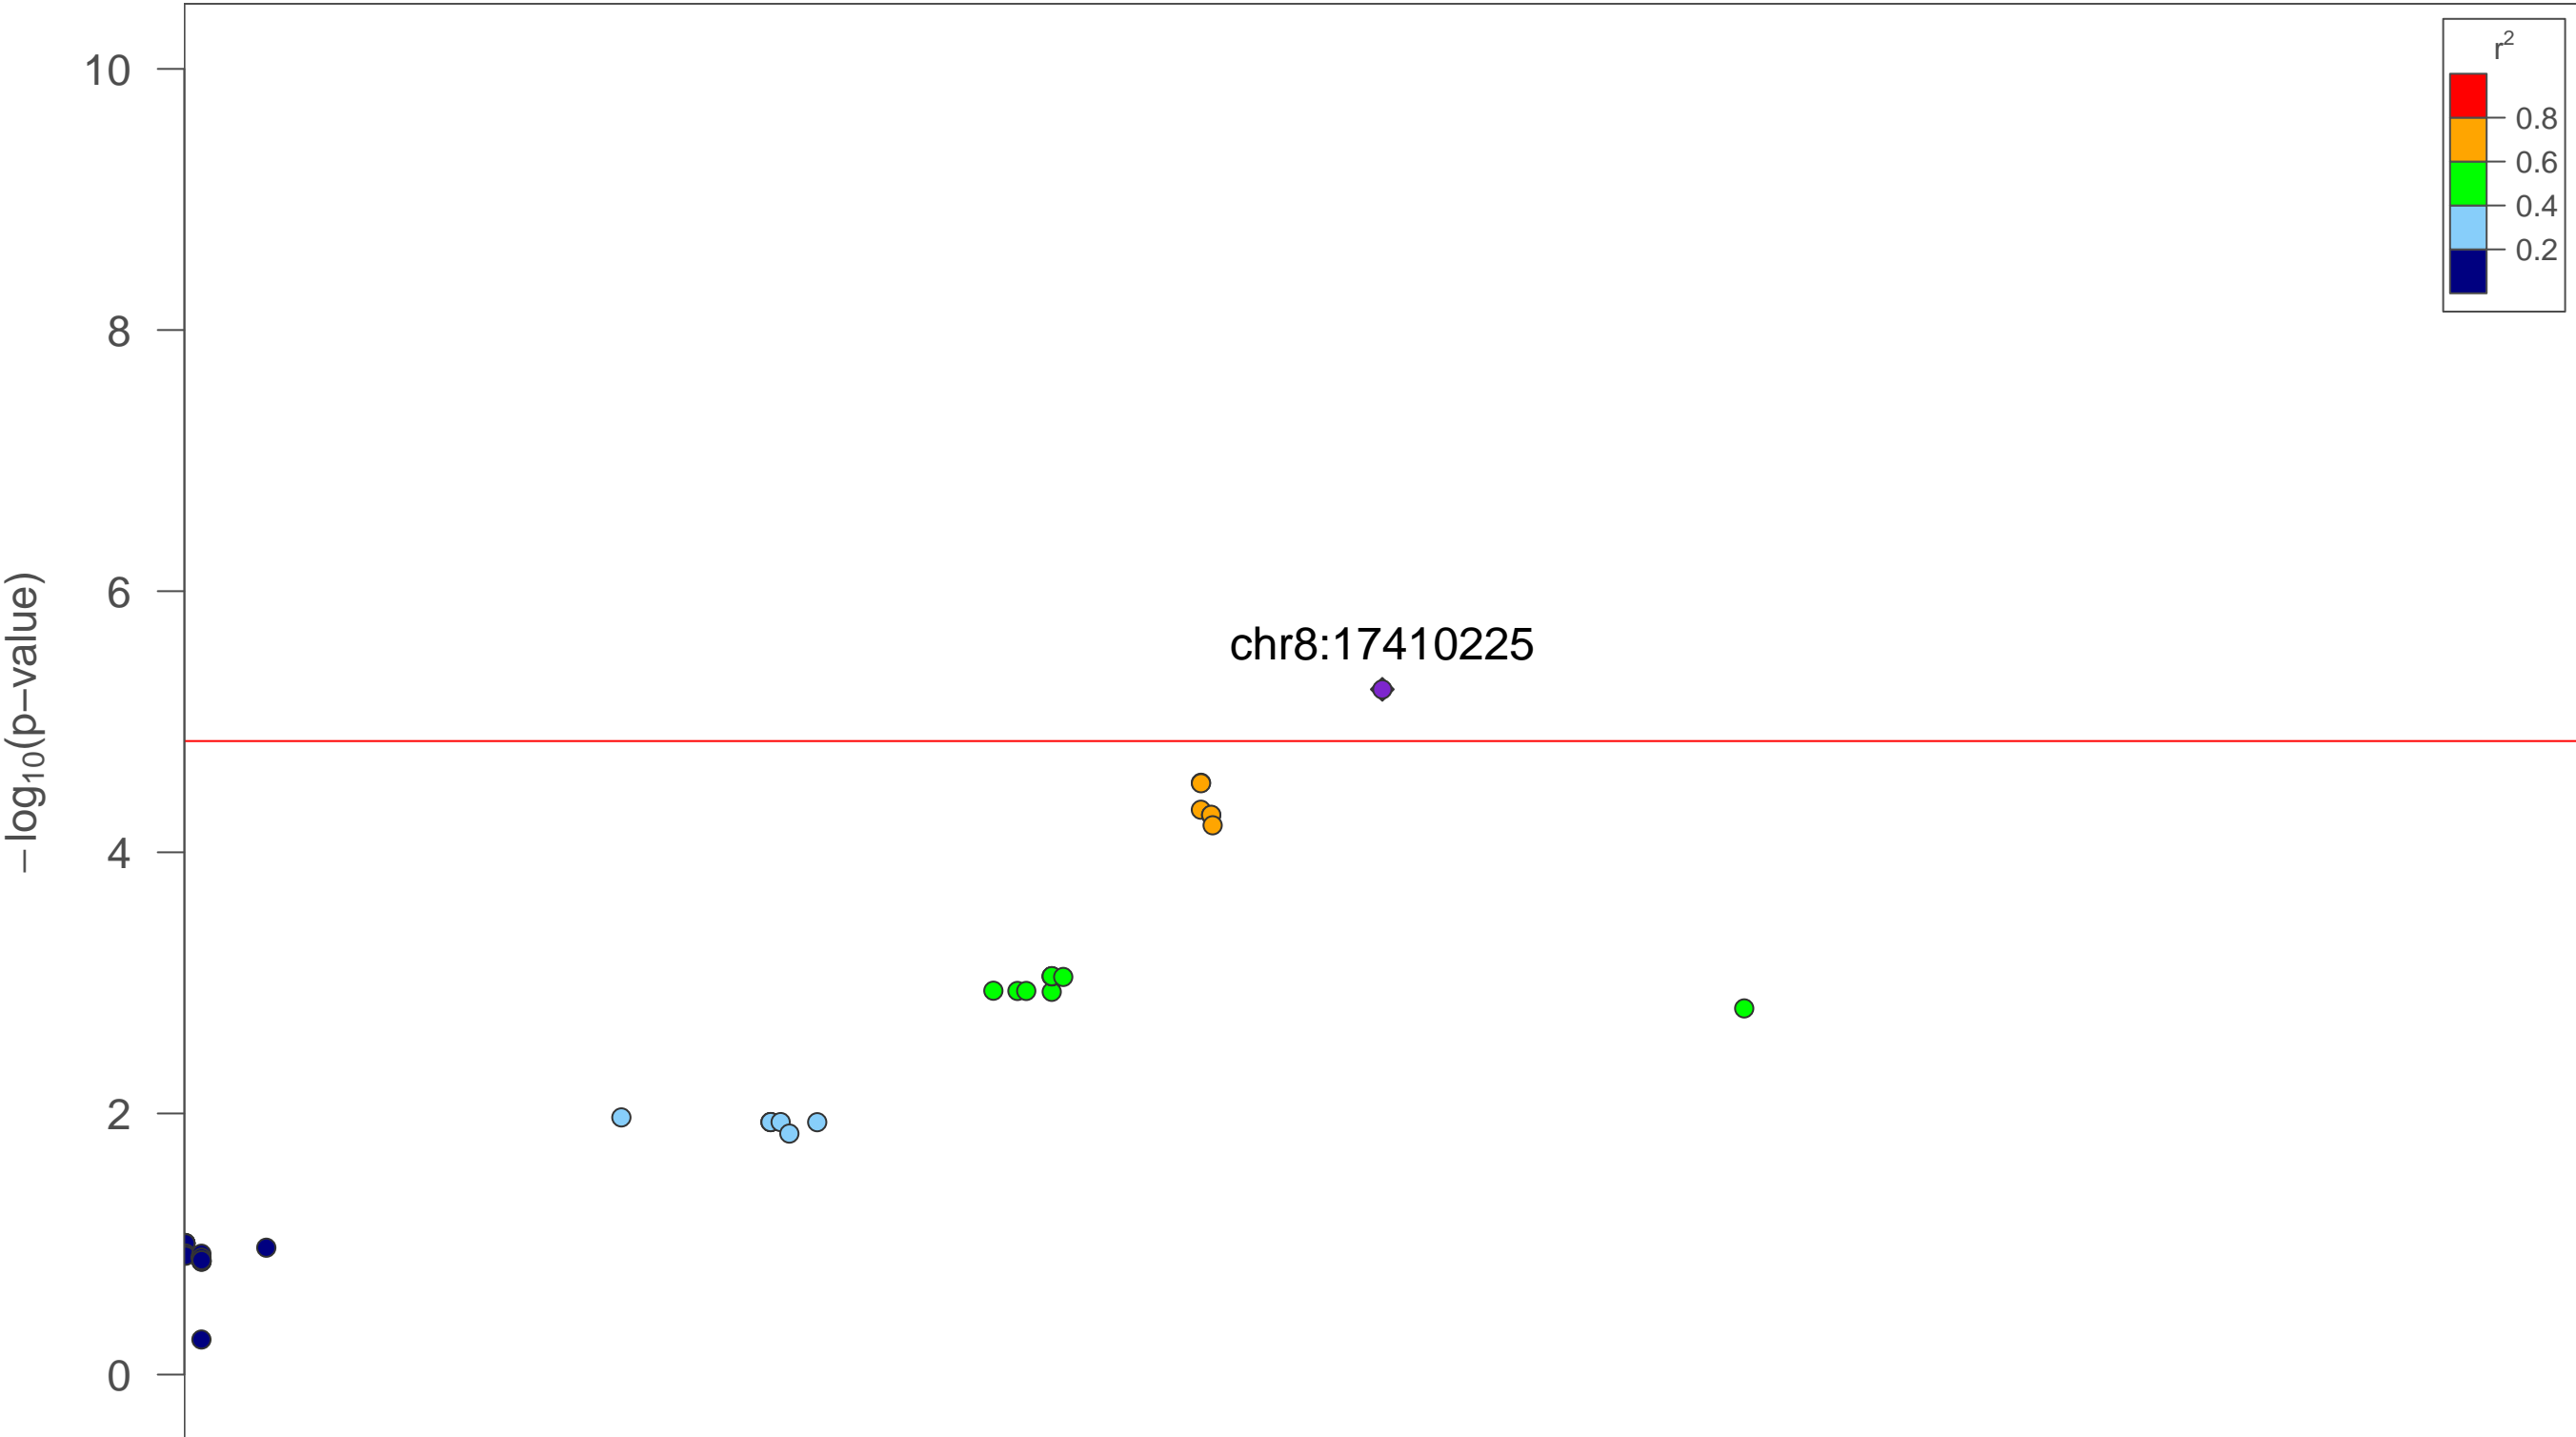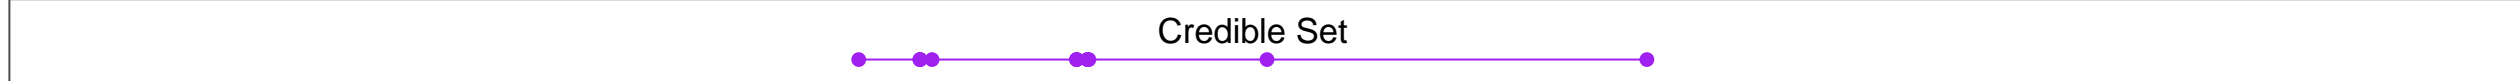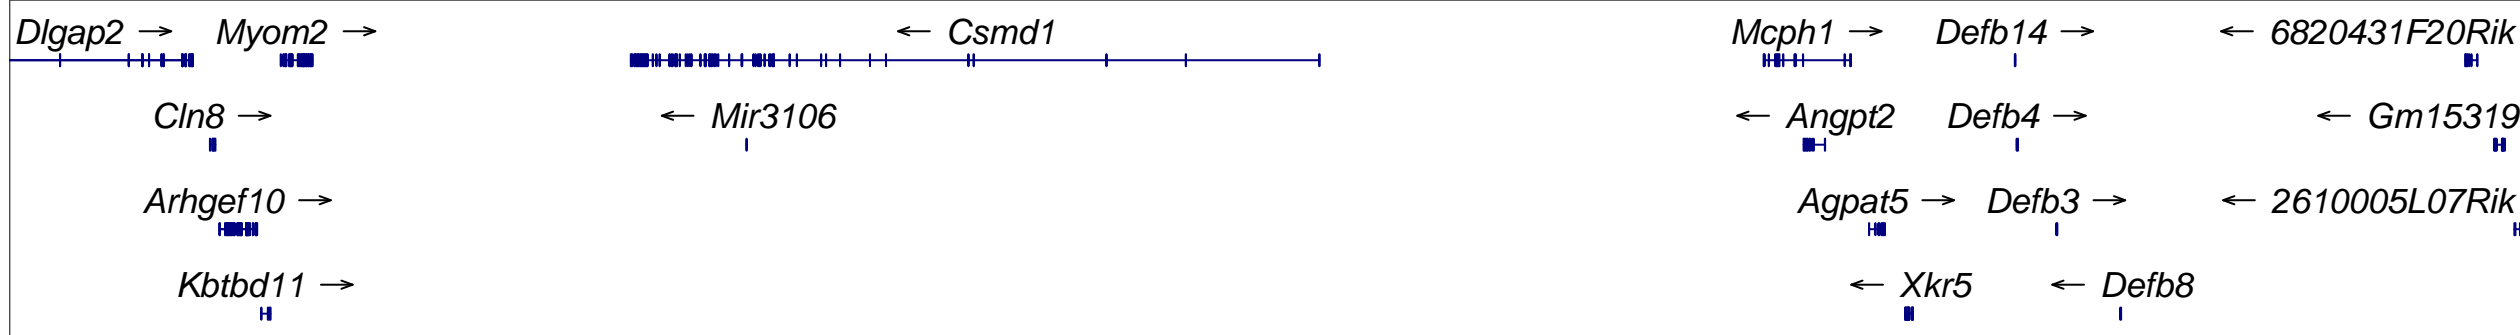

16 genes  
omitted

date: Thu Sep 12 15:41:31 2019

build: F34GBS

display range: chr8:14410225–20410225 [14410225–20410225]

hilite range: 0 – 0 [ 0 – 0 ]

reference SNP: chr8:17410225

number of SNPs plotted: 44

min P-value: 5.65E–6 [chr8:17410225]

max P-value: 5.38E–1 [chr8:14453253]

omitted Genes: BB014433, Defb40, Defb37

omitted Genes: Defb38, Defb39, Defb12

omitted Genes: Defb34, Spag11b, Spag11a

omitted Genes: Defa-ps12, Defb6, Defb46

omitted Genes: Defb5, Defa-ps13, Defb7

omitted Genes: 4930467E23Rik

Fine-mapping Regions

| snp           | chr | pos (Mb) | pp          | group        | color  |
|---------------|-----|----------|-------------|--------------|--------|
| chr8:16436293 | 8   | 16.43629 | 0.002657112 | Credible Set | purple |
| chr8:16582489 | 8   | 16.58249 | 0.002843833 | Credible Set | purple |
| chr8:16582510 | 8   | 16.58251 | 0.002837932 | Credible Set | purple |
| chr8:16582563 | 8   | 16.58256 | 0.002866557 | Credible Set | purple |
| chr8:16611215 | 8   | 16.61122 | 0.003196429 | Credible Set | purple |
| chr8:16955937 | 8   | 16.95594 | 0.040591511 | Credible Set | purple |
| chr8:16956175 | 8   | 16.95618 | 0.087794857 | Credible Set | purple |
| chr8:16956241 | 8   | 16.95624 | 0.086960946 | Credible Set | purple |
| chr8:16981604 | 8   | 16.98160 | 0.035117708 | Credible Set | purple |
| chr8:16981765 | 8   | 16.98176 | 0.035617812 | Credible Set | purple |
| chr8:16985325 | 8   | 16.98532 | 0.030632307 | Credible Set | purple |
| chr8:17410225 | 8   | 17.41023 | 0.651734254 | Credible Set | purple |
| chr8:18316447 | 8   | 18.31645 | 0.009281197 | Credible Set | purple |

F39–43 GBS, QT body weight

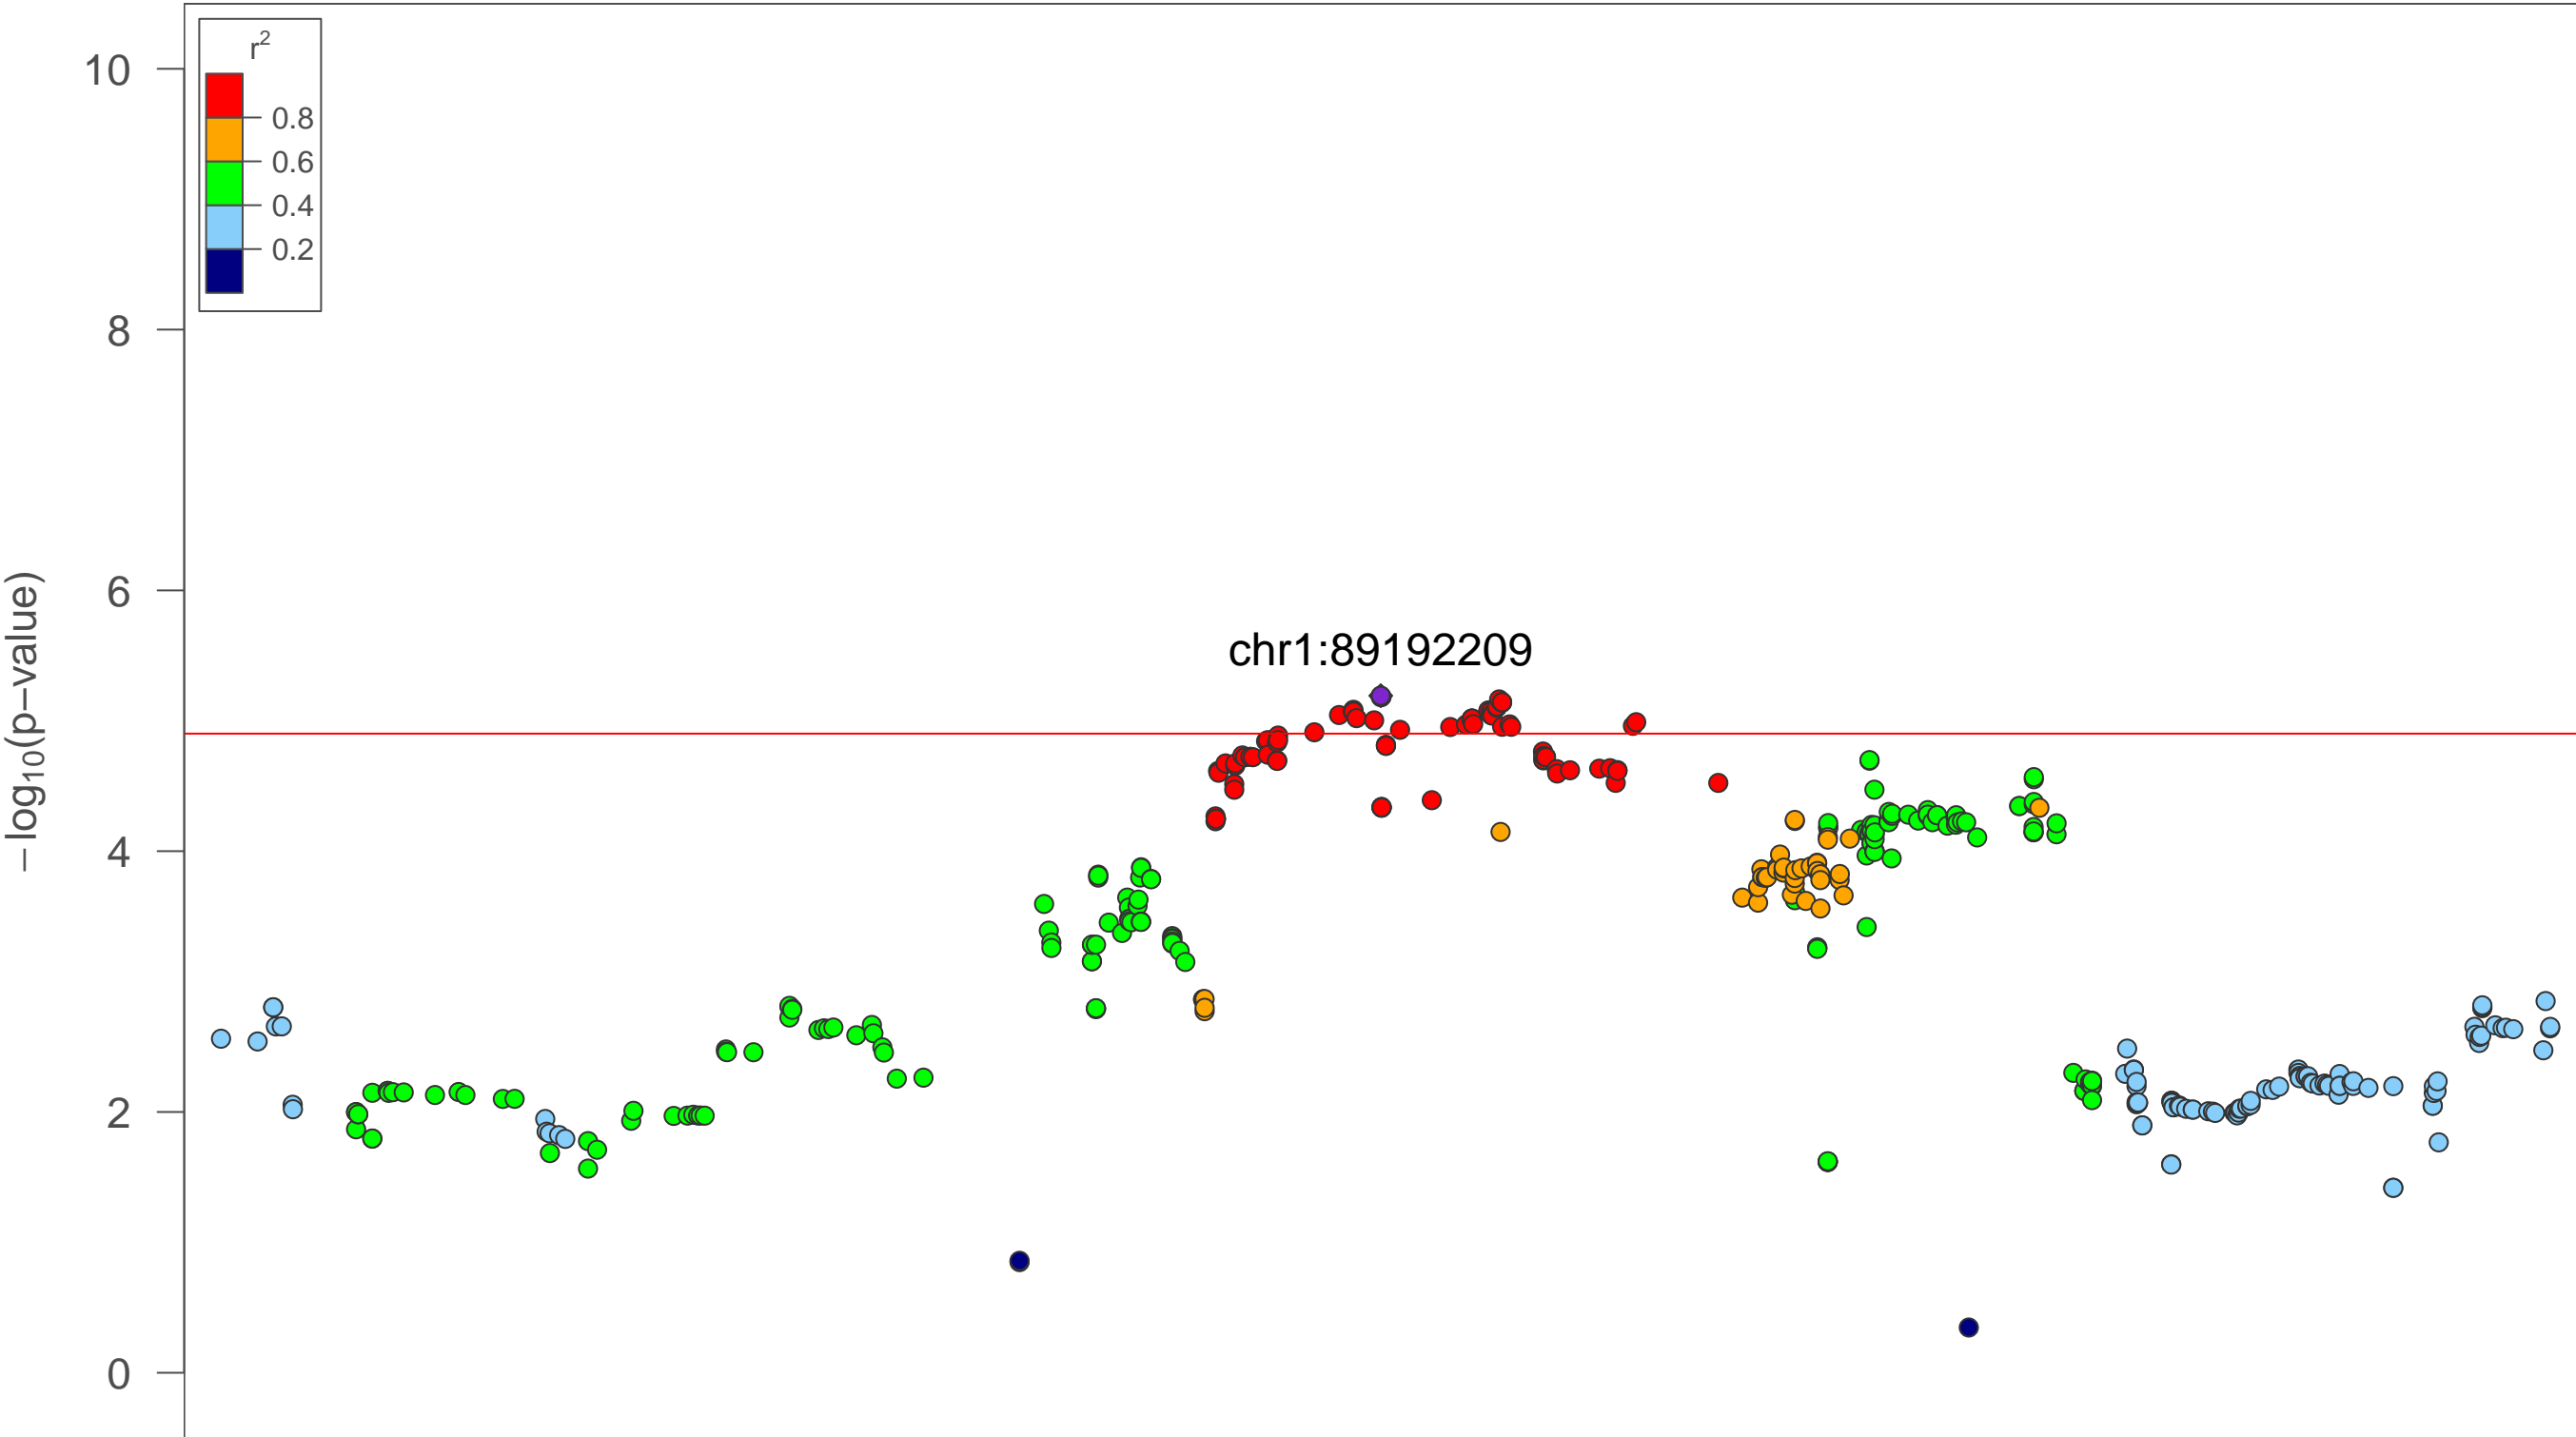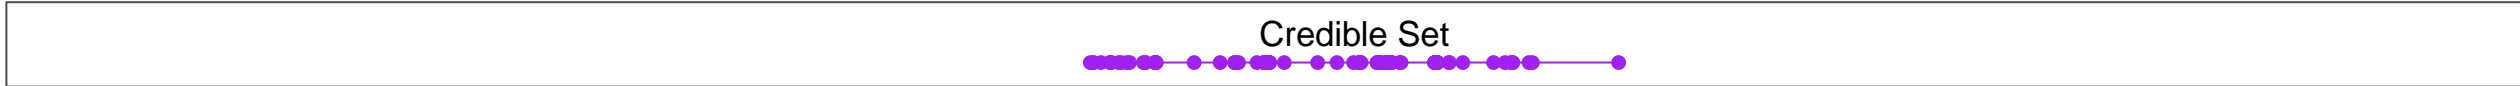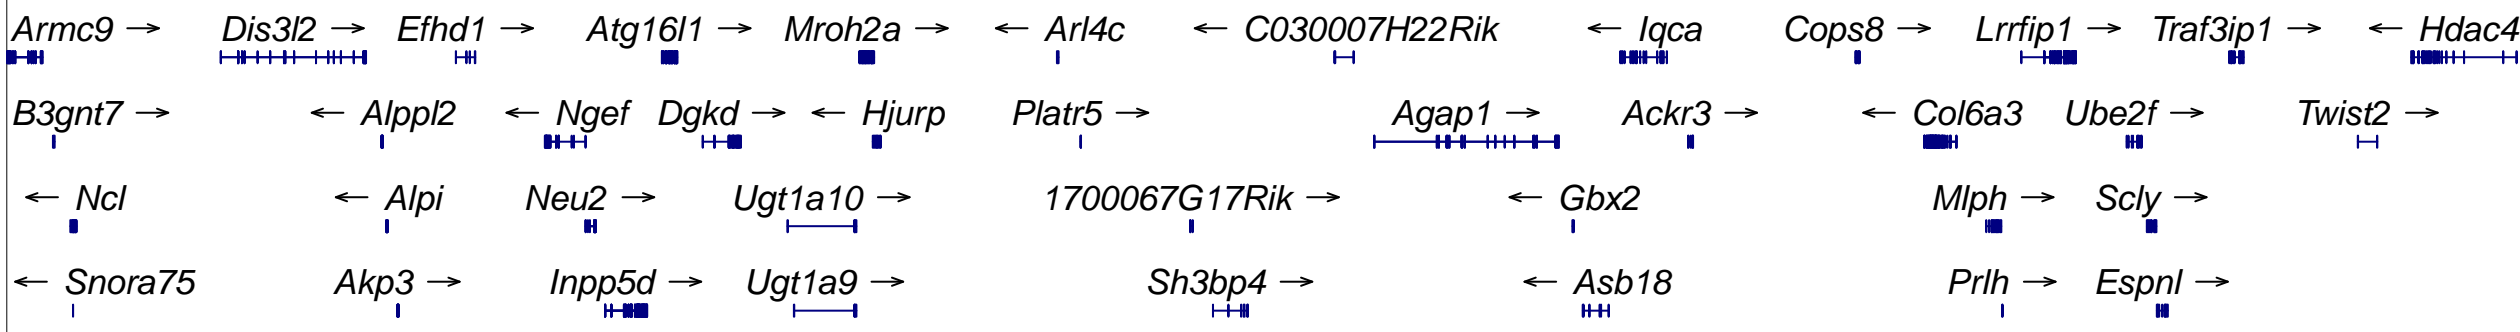

43 genes  
omitted

date: Tue Sep 17 11:45:02 2019  
build: F3943GBS  
display range: chr1:86192209–92192209 [86192209–92192209]  
hilite range: 0 – 0 [ 0 – 0 ]  
reference SNP: chr1:89192209  
number of SNPs plotted: 414  
min P-value: 6.42E–6 [chr1:89192209]  
max P-value: 4.49E–1 [chr1:90666257]  
omitted Genes: Gm24148, Snord82, C130036L24Rik  
omitted Genes: Nmur1, 1700019O17Rik, Ptma  
omitted Genes: Pde6d, Cops7b, Nppc  
omitted Genes: Ecel1, Prss56, Chrnd  
omitted Genes: Chrng, Eif4e2, Gigyf2  
omitted Genes: Kcnj13, 3110079O15Rik, Scarna6  
omitted Genes: Sag, Gm19582, Usp40  
omitted Genes: Ugt1a7c, Ugt1a6b, Ugt1a6a  
omitted Genes: Ugt1a5, Ugt1a2, Dnajb3  
omitted Genes: Ugt1a1, Trpm8, Spp2  
omitted Genes: Glrp1, Gm19589, 4933400F21Rik  
omitted Genes: Rab17, Rbm44, Ramp1  
omitted Genes: Klhl30, Fam132b, Ilkap  
omitted Genes: 1700020N18Rik, Hes6, Per2  
omitted Genes: Asb1

## Fine-mapping Regions

| snp           | chr | pos (Mb) | pp          | group        | color  |
|---------------|-----|----------|-------------|--------------|--------|
| chr1:88777876 | 1   | 88.77788 | 0.003079780 | Credible Set | purple |
| chr1:88784388 | 1   | 88.78439 | 0.006592937 | Credible Set | purple |
| chr1:88785582 | 1   | 88.78558 | 0.006400571 | Credible Set | purple |
| chr1:88802998 | 1   | 88.80300 | 0.007487706 | Credible Set | purple |
| chr1:88824885 | 1   | 88.82488 | 0.005293982 | Credible Set | purple |
| chr1:88824890 | 1   | 88.82489 | 0.004812662 | Credible Set | purple |
| chr1:88827360 | 1   | 88.82736 | 0.007199568 | Credible Set | purple |
| chr1:88827377 | 1   | 88.82738 | 0.007493551 | Credible Set | purple |
| chr1:88845338 | 1   | 88.84534 | 0.008562724 | Credible Set | purple |
| chr1:88851773 | 1   | 88.85177 | 0.008305175 | Credible Set | purple |
| chr1:88865215 | 1   | 88.86522 | 0.008369292 | Credible Set | purple |
| chr1:88871514 | 1   | 88.87151 | 0.008309671 | Credible Set | purple |
| chr1:88904681 | 1   | 88.90468 | 0.010875677 | Credible Set | purple |
| chr1:88908914 | 1   | 88.90891 | 0.011076981 | Credible Set | purple |
| chr1:88909213 | 1   | 88.90921 | 0.008660438 | Credible Set | purple |
| chr1:88932450 | 1   | 88.93245 | 0.007875014 | Credible Set | purple |
| chr1:88932455 | 1   | 88.93246 | 0.007805471 | Credible Set | purple |
| chr1:88932532 | 1   | 88.93253 | 0.010661921 | Credible Set | purple |
| chr1:88934810 | 1   | 88.93481 | 0.011970719 | Credible Set | purple |
| chr1:88934861 | 1   | 88.93486 | 0.011089817 | Credible Set | purple |
| chr1:89025632 | 1   | 89.02563 | 0.012641196 | Credible Set | purple |
| chr1:89087603 | 1   | 89.08760 | 0.016912470 | Credible Set | purple |
| chr1:89121837 | 1   | 89.12184 | 0.017987079 | Credible Set | purple |
| chr1:89123610 | 1   | 89.12361 | 0.018474930 | Credible Set | purple |
| chr1:89123797 | 1   | 89.12380 | 0.017908149 | Credible Set | purple |
| chr1:89131448 | 1   | 89.13145 | 0.016045139 | Credible Set | purple |
| chr1:89175511 | 1   | 89.17551 | 0.015465386 | Credible Set | purple |
| chr1:89192209 | 1   | 89.19221 | 0.023417018 | Credible Set | purple |
| chr1:89192251 | 1   | 89.19225 | 0.023412984 | Credible Set | purple |
| chr1:89192320 | 1   | 89.19232 | 0.022863202 | Credible Set | purple |
| chr1:89194144 | 1   | 89.19414 | 0.022972675 | Credible Set | purple |
| chr1:89194192 | 1   | 89.19419 | 0.003587467 | Credible Set | purple |
| chr1:89194214 | 1   | 89.19421 | 0.003608949 | Credible Set | purple |
| chr1:89194218 | 1   | 89.19422 | 0.003571682 | Credible Set | purple |
| chr1:89194220 | 1   | 89.19422 | 0.003556536 | Credible Set | purple |
| chr1:89194232 | 1   | 89.19423 | 0.003581347 | Credible Set | purple |



## Fine-mapping Regions

| snp           | chr | pos (Mb) | pp          | group        | color  |
|---------------|-----|----------|-------------|--------------|--------|
| chr1:89205191 | 1   | 89.20519 | 0.010056485 | Credible Set | purple |
| chr1:89205195 | 1   | 89.20520 | 0.010249331 | Credible Set | purple |
| chr1:89205255 | 1   | 89.20525 | 0.010069232 | Credible Set | purple |
| chr1:89240557 | 1   | 89.24056 | 0.013178969 | Credible Set | purple |
| chr1:89320129 | 1   | 89.32013 | 0.004038684 | Credible Set | purple |
| chr1:89366363 | 1   | 89.36636 | 0.013818955 | Credible Set | purple |
| chr1:89405937 | 1   | 89.40594 | 0.014390594 | Credible Set | purple |
| chr1:89419875 | 1   | 89.41988 | 0.015664568 | Credible Set | purple |
| chr1:89419992 | 1   | 89.41999 | 0.015563792 | Credible Set | purple |
| chr1:89420342 | 1   | 89.42034 | 0.015926613 | Credible Set | purple |
| chr1:89420838 | 1   | 89.42084 | 0.015906362 | Credible Set | purple |
| chr1:89420960 | 1   | 89.42096 | 0.015938756 | Credible Set | purple |
| chr1:89423865 | 1   | 89.42387 | 0.014505785 | Credible Set | purple |
| chr1:89462222 | 1   | 89.46222 | 0.018068530 | Credible Set | purple |
| chr1:89462289 | 1   | 89.46229 | 0.018255121 | Credible Set | purple |
| chr1:89462343 | 1   | 89.46234 | 0.018250358 | Credible Set | purple |
| chr1:89468744 | 1   | 89.46874 | 0.018056971 | Credible Set | purple |
| chr1:89468745 | 1   | 89.46874 | 0.016885074 | Credible Set | purple |
| chr1:89471737 | 1   | 89.47174 | 0.016734935 | Credible Set | purple |
| chr1:89483309 | 1   | 89.48331 | 0.019153309 | Credible Set | purple |
| chr1:89483313 | 1   | 89.48331 | 0.019542521 | Credible Set | purple |
| chr1:89488944 | 1   | 89.48894 | 0.022023145 | Credible Set | purple |
| chr1:89496208 | 1   | 89.49621 | 0.021115132 | Credible Set | purple |
| chr1:89496266 | 1   | 89.49627 | 0.020826723 | Credible Set | purple |
| chr1:89496279 | 1   | 89.49628 | 0.020985079 | Credible Set | purple |
| chr1:89496489 | 1   | 89.49649 | 0.013870823 | Credible Set | purple |
| chr1:89515318 | 1   | 89.51532 | 0.014444145 | Credible Set | purple |
| chr1:89519229 | 1   | 89.51923 | 0.013873445 | Credible Set | purple |
| chr1:89598858 | 1   | 89.59886 | 0.009149485 | Credible Set | purple |
| chr1:89599692 | 1   | 89.59969 | 0.008446572 | Credible Set | purple |
| chr1:89599832 | 1   | 89.59983 | 0.007877855 | Credible Set | purple |
| chr1:89599871 | 1   | 89.59987 | 0.007954455 | Credible Set | purple |
| chr1:89600374 | 1   | 89.60037 | 0.008470314 | Credible Set | purple |
| chr1:89605836 | 1   | 89.60584 | 0.008354275 | Credible Set | purple |
| chr1:89605944 | 1   | 89.60594 | 0.008331962 | Credible Set | purple |
| chr1:89605946 | 1   | 89.60595 | 0.008316411 | Credible Set | purple |

Fine-mapping Regions

| snp           | chr | pos (Mb) | pp          | group        | color  |
|---------------|-----|----------|-------------|--------------|--------|
| chr1:89606348 | 1   | 89.60635 | 0.008316099 | Credible Set | purple |
| chr1:89633220 | 1   | 89.63322 | 0.006804854 | Credible Set | purple |
| chr1:89634450 | 1   | 89.63445 | 0.006316662 | Credible Set | purple |
| chr1:89666611 | 1   | 89.66661 | 0.006671425 | Credible Set | purple |
| chr1:89739820 | 1   | 89.73982 | 0.006856863 | Credible Set | purple |
| chr1:89767259 | 1   | 89.76726 | 0.006909506 | Credible Set | purple |
| chr1:89781142 | 1   | 89.78114 | 0.005399895 | Credible Set | purple |
| chr1:89785438 | 1   | 89.78544 | 0.006690848 | Credible Set | purple |
| chr1:89785617 | 1   | 89.78562 | 0.006597891 | Credible Set | purple |
| chr1:89824300 | 1   | 89.82430 | 0.014088735 | Credible Set | purple |
| chr1:89832514 | 1   | 89.83251 | 0.014987232 | Credible Set | purple |
| chr1:90038291 | 1   | 90.03829 | 0.005395642 | Credible Set | purple |

# F39–43 GBS, QT body weight

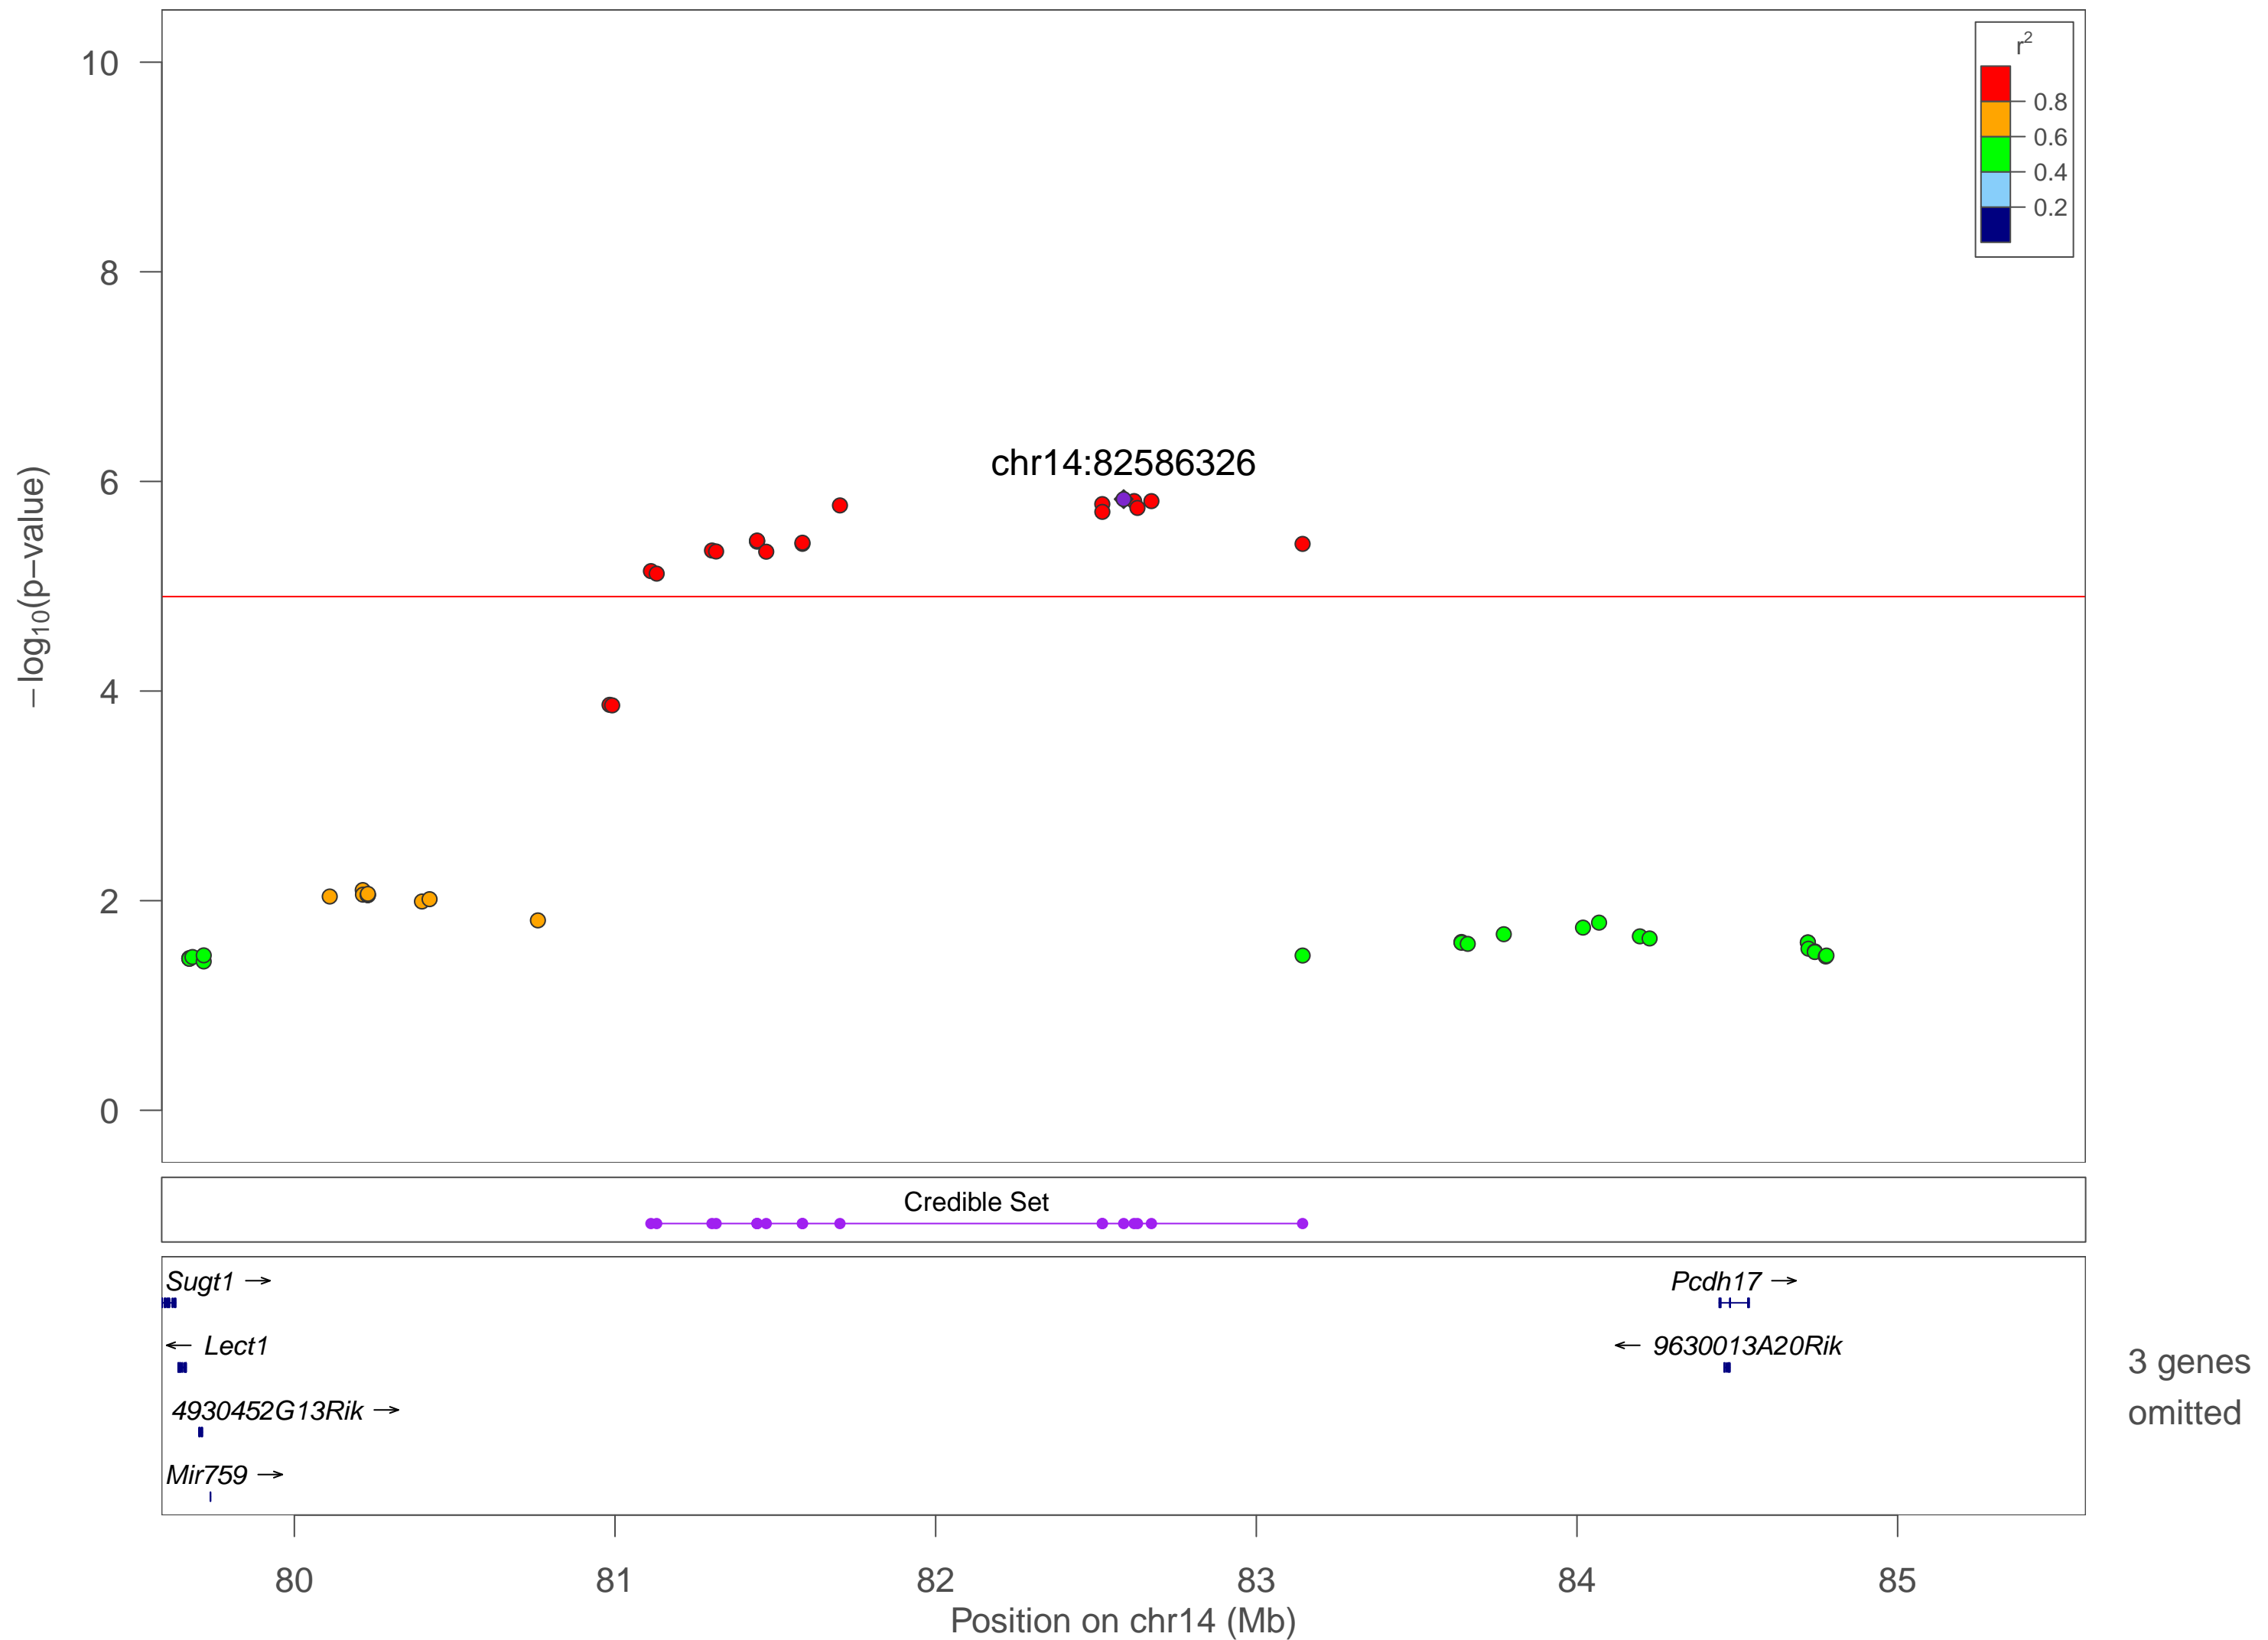

date: Tue Sep 17 11:45:11 2019

build: F3943GBS

display range: chr14:79586326–85586326 [79586326–85586326]

hilite range: 0 – 0 [ 0 – 0 ]

reference SNP: chr14:82586326

number of SNPs plotted: 53

min P-value: 1.48E–6 [chr14:82586326]

max P-value: 3.8E–2 [chr14:79717330]

omitted Genes: Pcdh8, Gm10845, Olfm4

Fine-mapping Regions

| snp            | chr | pos (Mb) | pp         | group        | color  |
|----------------|-----|----------|------------|--------------|--------|
| chr14:81112053 | 14  | 81.11205 | 0.02160319 | Credible Set | purple |
| chr14:81129931 | 14  | 81.12993 | 0.02048231 | Credible Set | purple |
| chr14:81302522 | 14  | 81.30252 | 0.03331979 | Credible Set | purple |
| chr14:81315250 | 14  | 81.31525 | 0.03263550 | Credible Set | purple |
| chr14:81443053 | 14  | 81.44305 | 0.04015311 | Credible Set | purple |
| chr14:81443088 | 14  | 81.44309 | 0.04074869 | Credible Set | purple |
| chr14:81443103 | 14  | 81.44310 | 0.04108474 | Credible Set | purple |
| chr14:81471656 | 14  | 81.47166 | 0.03249544 | Credible Set | purple |
| chr14:81584557 | 14  | 81.58456 | 0.03835536 | Credible Set | purple |
| chr14:81584584 | 14  | 81.58458 | 0.03925128 | Credible Set | purple |
| chr14:81701500 | 14  | 81.70150 | 0.08618979 | Credible Set | purple |
| chr14:82519671 | 14  | 82.51967 | 0.08861495 | Credible Set | purple |
| chr14:82519834 | 14  | 82.51983 | 0.07519610 | Credible Set | purple |
| chr14:82586326 | 14  | 82.58633 | 0.09837695 | Credible Set | purple |
| chr14:82618916 | 14  | 82.61892 | 0.09444686 | Credible Set | purple |
| chr14:82629334 | 14  | 82.62933 | 0.08172418 | Credible Set | purple |
| chr14:82672838 | 14  | 82.67284 | 0.09438980 | Credible Set | purple |
| chr14:83144282 | 14  | 83.14428 | 0.03829432 | Credible Set | purple |

# F39–43 GBS, QT locomotor test day 2, total distance travelled in 30min (cm)

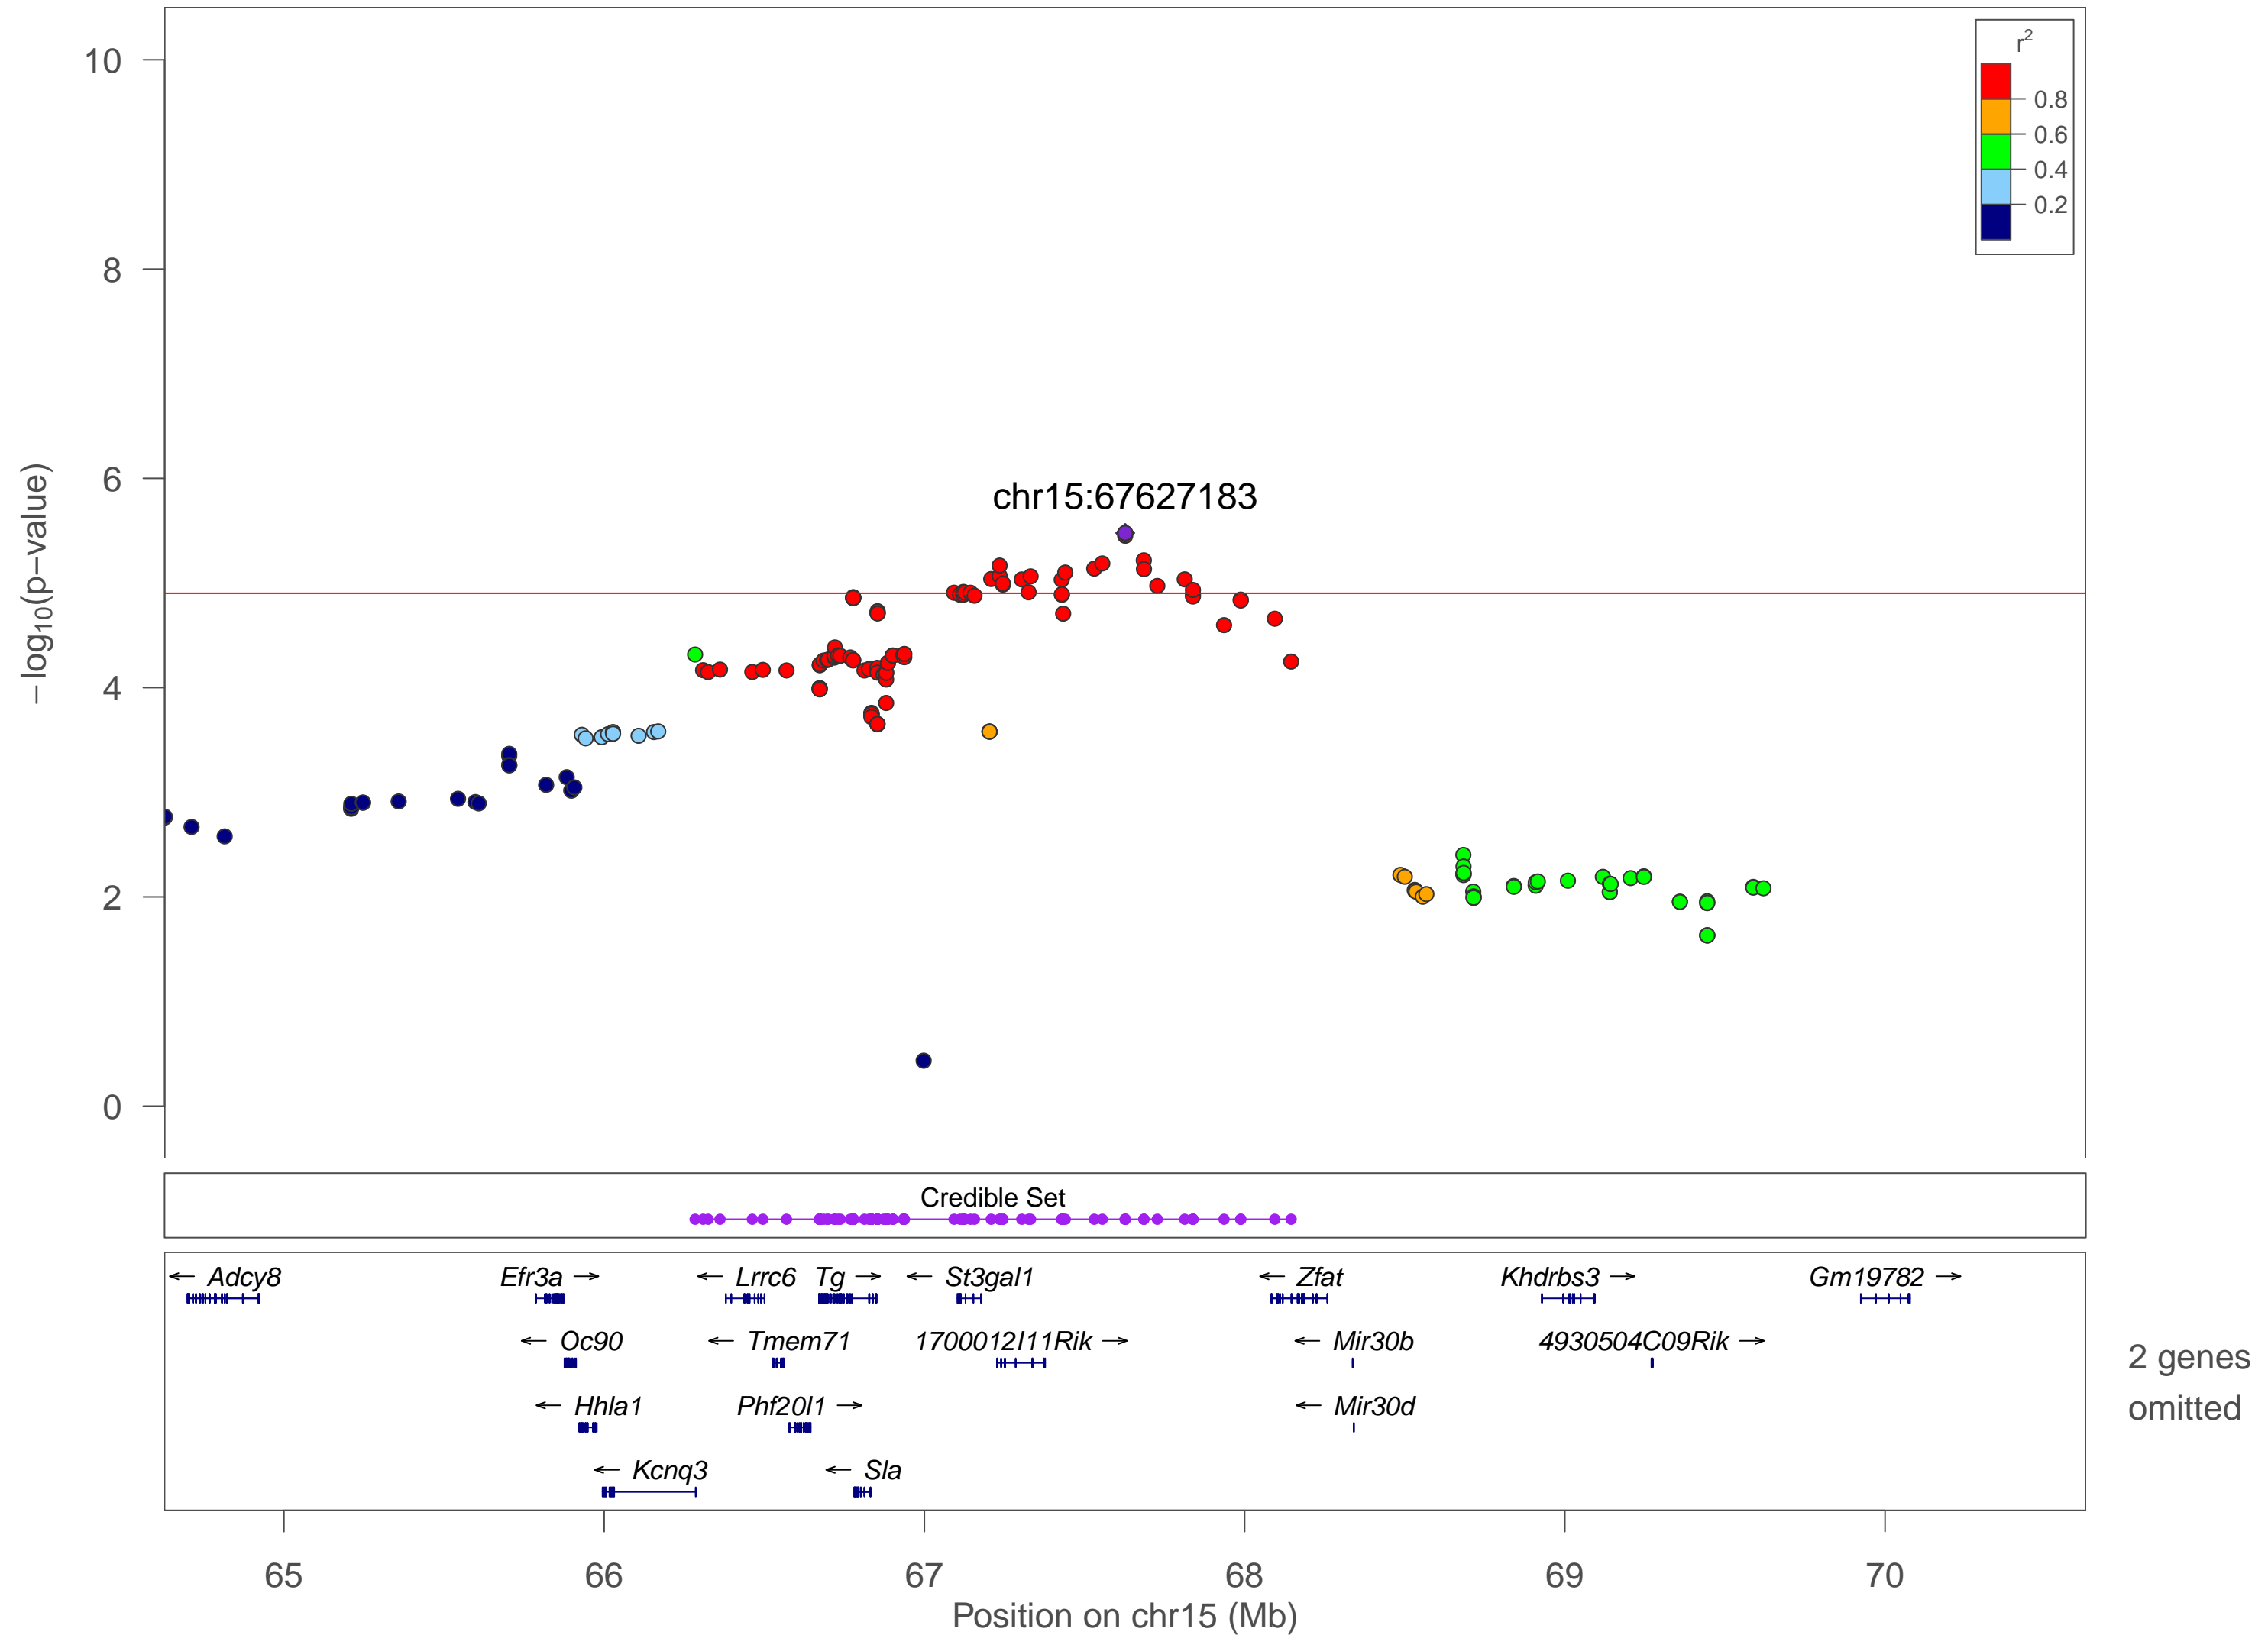

date: Thu Sep 12 16:09:56 2019

build: F3943GBS

display range: chr15:64627183–70627183 [64627183–70627183]

hilite range: 0 – 0 [ 0 – 0 ]

reference SNP: chr15:67627183

number of SNPs plotted: 186

min P-value: 3.33E–6 [chr15:67627183]

max P-value: 3.68E–1 [chr15:66997733]

omitted Genes: Wisp1, Ndr1

## Fine-mapping Regions

| snp            | chr | pos (Mb) | pp          | group        | color  |
|----------------|-----|----------|-------------|--------------|--------|
| chr15:66284046 | 15  | 66.28405 | 0.009095061 | Credible Set | purple |
| chr15:66309070 | 15  | 66.30907 | 0.004174069 | Credible Set | purple |
| chr15:66324506 | 15  | 66.32451 | 0.003806316 | Credible Set | purple |
| chr15:66361813 | 15  | 66.36181 | 0.003486355 | Credible Set | purple |
| chr15:66462727 | 15  | 66.46273 | 0.002862574 | Credible Set | purple |
| chr15:66495529 | 15  | 66.49553 | 0.003048382 | Credible Set | purple |
| chr15:66569471 | 15  | 66.56947 | 0.002912550 | Credible Set | purple |
| chr15:66672984 | 15  | 66.67298 | 0.002339349 | Credible Set | purple |
| chr15:66672997 | 15  | 66.67300 | 0.002370813 | Credible Set | purple |
| chr15:66673010 | 15  | 66.67301 | 0.002356478 | Credible Set | purple |
| chr15:66673015 | 15  | 66.67302 | 0.002280457 | Credible Set | purple |
| chr15:66673436 | 15  | 66.67344 | 0.003306487 | Credible Set | purple |
| chr15:66673541 | 15  | 66.67354 | 0.003337212 | Credible Set | purple |
| chr15:66673940 | 15  | 66.67394 | 0.003349784 | Credible Set | purple |
| chr15:66685097 | 15  | 66.68510 | 0.003628270 | Credible Set | purple |
| chr15:66696518 | 15  | 66.69652 | 0.003644474 | Credible Set | purple |
| chr15:66699723 | 15  | 66.69972 | 0.003690170 | Credible Set | purple |
| chr15:66719126 | 15  | 66.71913 | 0.003856961 | Credible Set | purple |
| chr15:66719241 | 15  | 66.71924 | 0.004096199 | Credible Set | purple |
| chr15:66720772 | 15  | 66.72077 | 0.004077460 | Credible Set | purple |
| chr15:66730424 | 15  | 66.73042 | 0.003522765 | Credible Set | purple |
| chr15:66737376 | 15  | 66.73738 | 0.003482118 | Credible Set | purple |
| chr15:66768701 | 15  | 66.76870 | 0.003306505 | Credible Set | purple |
| chr15:66777400 | 15  | 66.77740 | 0.003146166 | Credible Set | purple |
| chr15:66777425 | 15  | 66.77742 | 0.003094446 | Credible Set | purple |
| chr15:66777461 | 15  | 66.77746 | 0.003105183 | Credible Set | purple |
| chr15:66777706 | 15  | 66.77771 | 0.004844574 | Credible Set | purple |
| chr15:66777728 | 15  | 66.77773 | 0.004765452 | Credible Set | purple |
| chr15:66777729 | 15  | 66.77773 | 0.004792520 | Credible Set | purple |
| chr15:66777730 | 15  | 66.77773 | 0.004758596 | Credible Set | purple |
| chr15:66777731 | 15  | 66.77773 | 0.004713320 | Credible Set | purple |
| chr15:66777743 | 15  | 66.77774 | 0.004751663 | Credible Set | purple |
| chr15:66812941 | 15  | 66.81294 | 0.002344944 | Credible Set | purple |
| chr15:66826934 | 15  | 66.82693 | 0.002362889 | Credible Set | purple |
| chr15:66834506 | 15  | 66.83451 | 0.002718278 | Credible Set | purple |
| chr15:66834532 | 15  | 66.83453 | 0.002726612 | Credible Set | purple |



## Fine-mapping Regions

| snp            | chr | pos (Mb) | pp          | group        | color  |
|----------------|-----|----------|-------------|--------------|--------|
| chr15:66834574 | 15  | 66.83457 | 0.002737624 | Credible Set | purple |
| chr15:66834575 | 15  | 66.83458 | 0.002776346 | Credible Set | purple |
| chr15:66834600 | 15  | 66.83460 | 0.002301835 | Credible Set | purple |
| chr15:66834621 | 15  | 66.83462 | 0.002364886 | Credible Set | purple |
| chr15:66834624 | 15  | 66.83462 | 0.002311512 | Credible Set | purple |
| chr15:66834637 | 15  | 66.83464 | 0.002248665 | Credible Set | purple |
| chr15:66853166 | 15  | 66.85317 | 0.002533244 | Credible Set | purple |
| chr15:66853439 | 15  | 66.85344 | 0.002400159 | Credible Set | purple |
| chr15:66853460 | 15  | 66.85346 | 0.002386901 | Credible Set | purple |
| chr15:66853489 | 15  | 66.85349 | 0.002402281 | Credible Set | purple |
| chr15:66853520 | 15  | 66.85352 | 0.002161535 | Credible Set | purple |
| chr15:66853893 | 15  | 66.85389 | 0.009434574 | Credible Set | purple |
| chr15:66853894 | 15  | 66.85389 | 0.009332540 | Credible Set | purple |
| chr15:66853923 | 15  | 66.85392 | 0.009386891 | Credible Set | purple |
| chr15:66853954 | 15  | 66.85395 | 0.009336174 | Credible Set | purple |
| chr15:66872519 | 15  | 66.87252 | 0.002113078 | Credible Set | purple |
| chr15:66880635 | 15  | 66.88063 | 0.001901124 | Credible Set | purple |
| chr15:66880638 | 15  | 66.88064 | 0.001900495 | Credible Set | purple |
| chr15:66886219 | 15  | 66.88622 | 0.002960970 | Credible Set | purple |
| chr15:66886266 | 15  | 66.88627 | 0.002949433 | Credible Set | purple |
| chr15:66901528 | 15  | 66.90153 | 0.004157208 | Credible Set | purple |
| chr15:66901548 | 15  | 66.90155 | 0.004157208 | Credible Set | purple |
| chr15:66901593 | 15  | 66.90159 | 0.004157208 | Credible Set | purple |
| chr15:66935376 | 15  | 66.93538 | 0.004214125 | Credible Set | purple |
| chr15:66935390 | 15  | 66.93539 | 0.004214125 | Credible Set | purple |
| chr15:66935391 | 15  | 66.93539 | 0.004214125 | Credible Set | purple |
| chr15:66935405 | 15  | 66.93541 | 0.004214125 | Credible Set | purple |
| chr15:66937231 | 15  | 66.93723 | 0.004302561 | Credible Set | purple |
| chr15:66937423 | 15  | 66.93742 | 0.004280379 | Credible Set | purple |
| chr15:67092666 | 15  | 67.09267 | 0.023149492 | Credible Set | purple |
| chr15:67111279 | 15  | 67.11128 | 0.021946184 | Credible Set | purple |
| chr15:67121570 | 15  | 67.12157 | 0.021434297 | Credible Set | purple |
| chr15:67121571 | 15  | 67.12157 | 0.021473471 | Credible Set | purple |
| chr15:67121756 | 15  | 67.12176 | 0.022932326 | Credible Set | purple |
| chr15:67126159 | 15  | 67.12616 | 0.022904561 | Credible Set | purple |
| chr15:67144054 | 15  | 67.14405 | 0.023385776 | Credible Set | purple |

## Fine-mapping Regions

| snp            | chr | pos (Mb) | pp          | group        | color  |
|----------------|-----|----------|-------------|--------------|--------|
| chr15:67156480 | 15  | 67.15648 | 0.021732059 | Credible Set | purple |
| chr15:67208761 | 15  | 67.20876 | 0.028902789 | Credible Set | purple |
| chr15:67234910 | 15  | 67.23491 | 0.030170101 | Credible Set | purple |
| chr15:67235072 | 15  | 67.23507 | 0.039641188 | Credible Set | purple |
| chr15:67245093 | 15  | 67.24509 | 0.020275431 | Credible Set | purple |
| chr15:67245123 | 15  | 67.24512 | 0.020764487 | Credible Set | purple |
| chr15:67304194 | 15  | 67.30419 | 0.020854847 | Credible Set | purple |
| chr15:67325463 | 15  | 67.32546 | 0.014392780 | Credible Set | purple |
| chr15:67331738 | 15  | 67.33174 | 0.026049506 | Credible Set | purple |
| chr15:67428857 | 15  | 67.42886 | 0.021620813 | Credible Set | purple |
| chr15:67429407 | 15  | 67.42941 | 0.017152161 | Credible Set | purple |
| chr15:67429420 | 15  | 67.42942 | 0.016116054 | Credible Set | purple |
| chr15:67433395 | 15  | 67.43340 | 0.023512753 | Credible Set | purple |
| chr15:67439974 | 15  | 67.43997 | 0.023375125 | Credible Set | purple |
| chr15:67530570 | 15  | 67.53057 | 0.023834869 | Credible Set | purple |
| chr15:67555683 | 15  | 67.55568 | 0.026833500 | Credible Set | purple |
| chr15:67627161 | 15  | 67.62716 | 0.027107727 | Credible Set | purple |
| chr15:67627183 | 15  | 67.62718 | 0.028412895 | Credible Set | purple |
| chr15:67627194 | 15  | 67.62719 | 0.028227699 | Credible Set | purple |
| chr15:67685224 | 15  | 67.68522 | 0.019457727 | Credible Set | purple |
| chr15:67685781 | 15  | 67.68578 | 0.016032399 | Credible Set | purple |
| chr15:67727448 | 15  | 67.72745 | 0.013306608 | Credible Set | purple |
| chr15:67812971 | 15  | 67.81297 | 0.014392987 | Credible Set | purple |
| chr15:67838708 | 15  | 67.83871 | 0.011158339 | Credible Set | purple |
| chr15:67838720 | 15  | 67.83872 | 0.010791534 | Credible Set | purple |
| chr15:67838721 | 15  | 67.83872 | 0.012174787 | Credible Set | purple |
| chr15:67935812 | 15  | 67.93581 | 0.006072829 | Credible Set | purple |
| chr15:67987913 | 15  | 67.98791 | 0.009246112 | Credible Set | purple |
| chr15:67987932 | 15  | 67.98793 | 0.009117363 | Credible Set | purple |
| chr15:68094377 | 15  | 68.09438 | 0.006342155 | Credible Set | purple |
| chr15:68145325 | 15  | 68.14532 | 0.003513975 | Credible Set | purple |

F34, F39–43 GBS, QT locomotor test day 1, total distance travelled in 30min (cm)

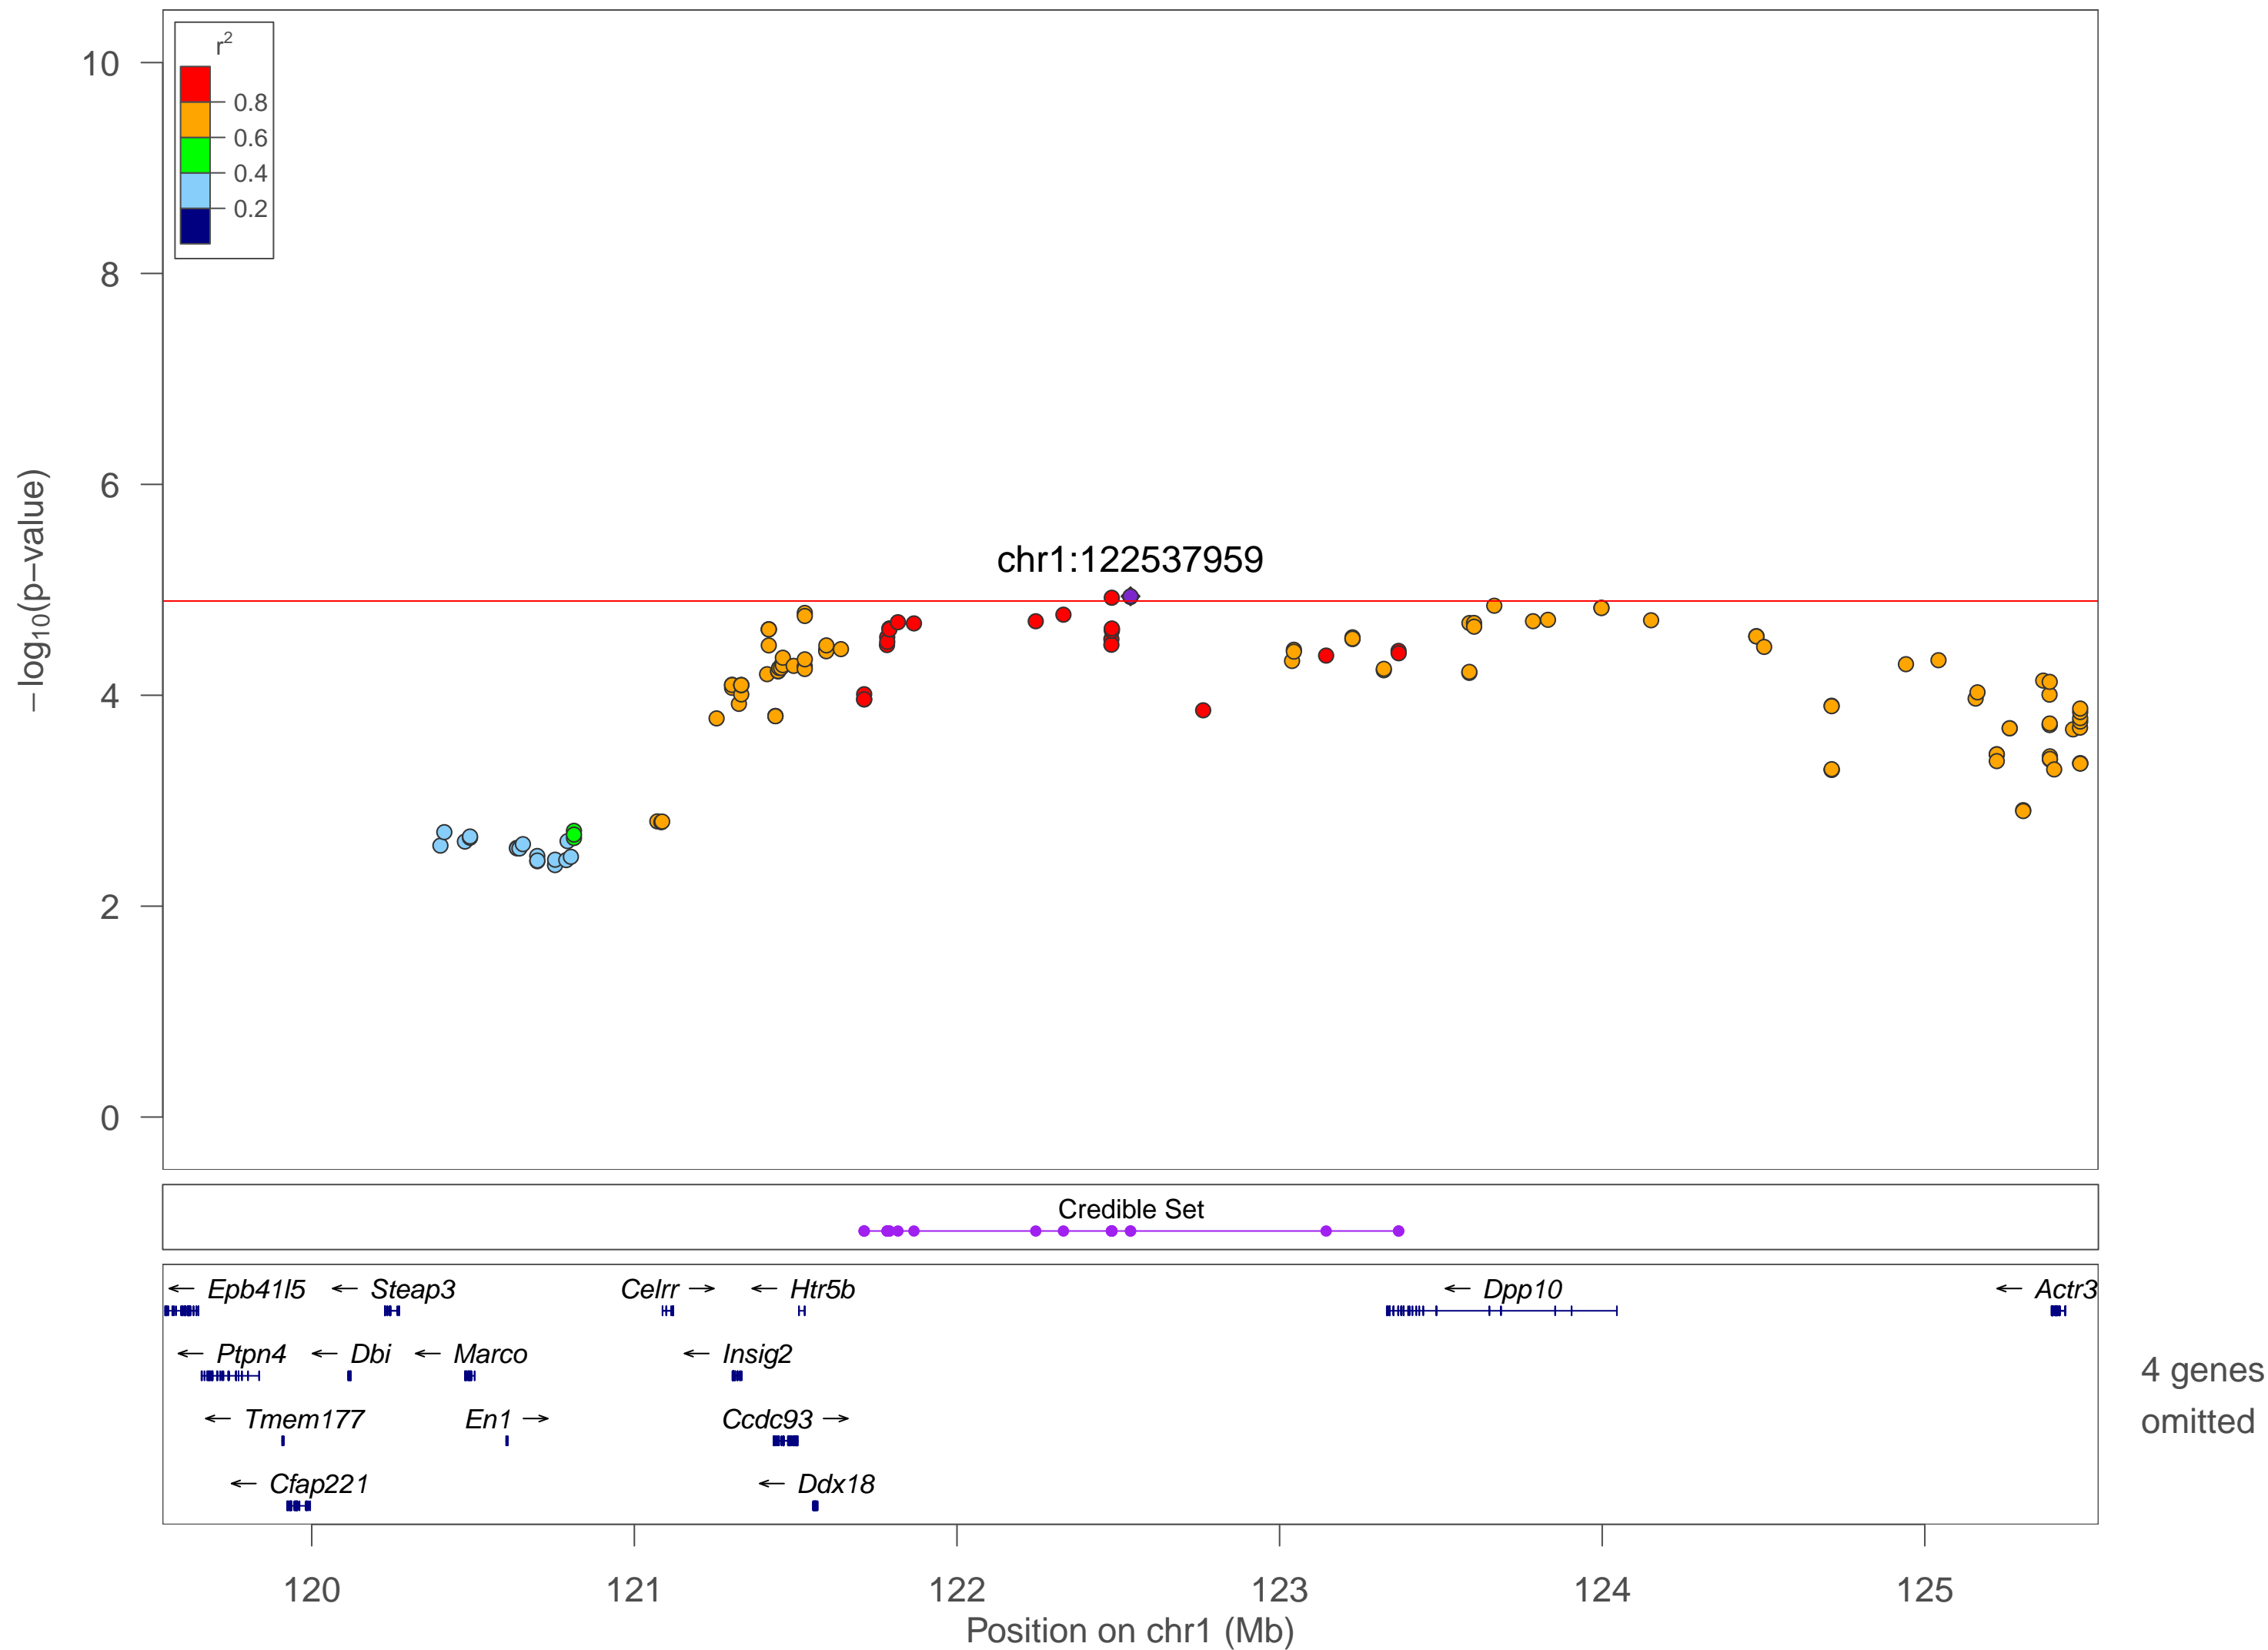

date: Thu Sep 12 17:16:14 2019

build: F3443GBS

display range: chr1:119537959–125537959 [119537959–125537959]

hilite range: 0 – 0 [ 0 – 0 ]

reference SNP: chr1:122537959

number of SNPs plotted: 141

min P-value: 1.15E–5 [chr1:122537959]

max P-value: 4.08E–3 [chr1:120754192]

omitted Genes: Sctr, Tmem37, 3110009E18Rik

omitted Genes: C1ql2

## Fine-mapping Regions

| snp            | chr | pos (Mb) | pp         | group        | color  |
|----------------|-----|----------|------------|--------------|--------|
| chr1:121712291 | 1   | 121.7123 | 0.01048633 | Credible Set | purple |
| chr1:121712326 | 1   | 121.7123 | 0.01167864 | Credible Set | purple |
| chr1:121712327 | 1   | 121.7123 | 0.01050811 | Credible Set | purple |
| chr1:121783108 | 1   | 121.7831 | 0.03228209 | Credible Set | purple |
| chr1:121783777 | 1   | 121.7838 | 0.03803749 | Credible Set | purple |
| chr1:121783797 | 1   | 121.7838 | 0.03451248 | Credible Set | purple |
| chr1:121790517 | 1   | 121.7905 | 0.04559009 | Credible Set | purple |
| chr1:121790555 | 1   | 121.7906 | 0.04472153 | Credible Set | purple |
| chr1:121817004 | 1   | 121.8170 | 0.05187528 | Credible Set | purple |
| chr1:121866576 | 1   | 121.8666 | 0.05059906 | Credible Set | purple |
| chr1:122244126 | 1   | 122.2441 | 0.05290792 | Credible Set | purple |
| chr1:122329939 | 1   | 122.3299 | 0.06065876 | Credible Set | purple |
| chr1:122478661 | 1   | 122.4787 | 0.03646178 | Credible Set | purple |
| chr1:122478665 | 1   | 122.4787 | 0.03249151 | Credible Set | purple |
| chr1:122479820 | 1   | 122.4798 | 0.08637499 | Credible Set | purple |
| chr1:122480027 | 1   | 122.4800 | 0.04496138 | Credible Set | purple |
| chr1:122480078 | 1   | 122.4801 | 0.04345934 | Credible Set | purple |
| chr1:122480093 | 1   | 122.4801 | 0.04552479 | Credible Set | purple |
| chr1:122537959 | 1   | 122.5380 | 0.08897290 | Credible Set | purple |
| chr1:122537965 | 1   | 122.5380 | 0.08770913 | Credible Set | purple |
| chr1:123144261 | 1   | 123.1443 | 0.02594387 | Credible Set | purple |
| chr1:123368825 | 1   | 123.3688 | 0.02861575 | Credible Set | purple |
| chr1:123369170 | 1   | 123.3692 | 0.02724266 | Credible Set | purple |

F34, F39–43 GBS, QT locomotor test day 1, total distance travelled in 30min (cm)

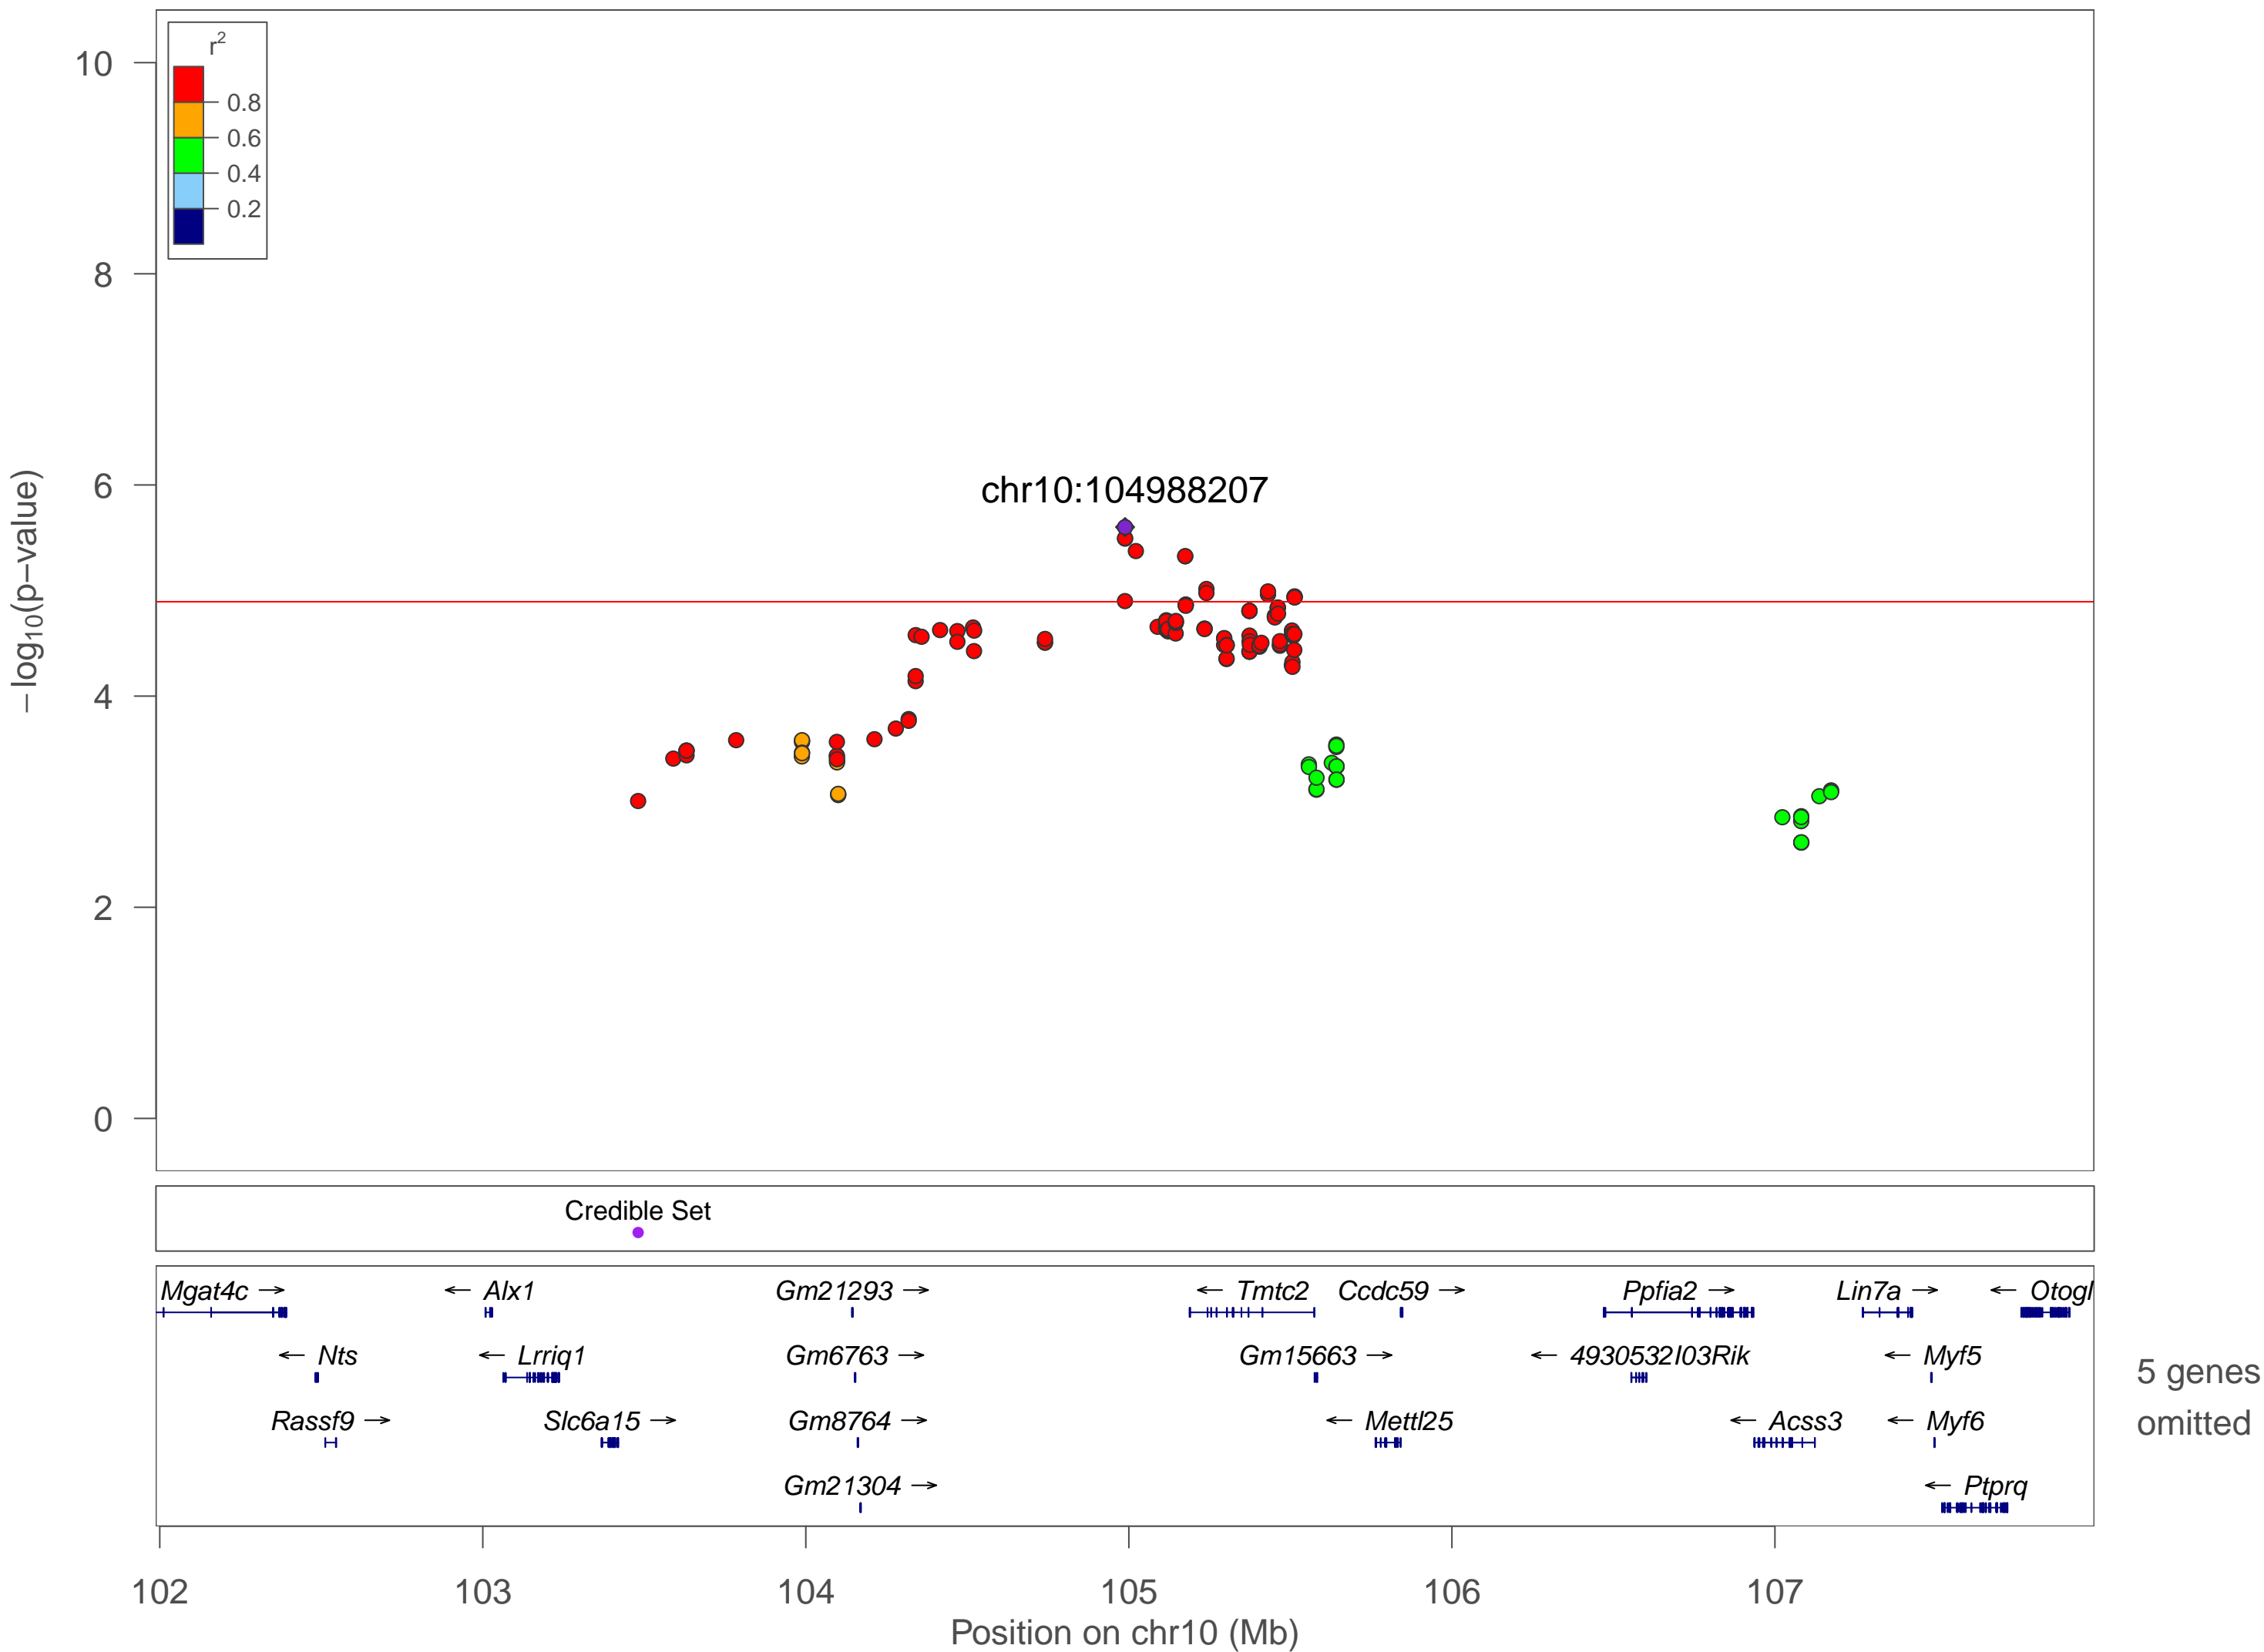

date: Thu Sep 12 16:47:12 2019

build: F3443GBS

display range: chr10:101988207–107988207 [101988207–107988207]

hilite range: 0 – 0 [ 0 – 0 ]

reference SNP: chr10:104988207

number of SNPs plotted: 142

min P-value: 2.51E–6 [chr10:104988207]

max P-value: 2.44E–3 [chr10:107081609]

omitted Genes: Gm21312, Gm20765, Gm4340

omitted Genes: Mir6411, Gm29685

Fine-mapping Regions

| snp             | chr | pos (Mb) | pp | group        | color  |
|-----------------|-----|----------|----|--------------|--------|
| chr10:103480830 | 10  | 103.4808 | 0  | Credible Set | purple |



F34, F39–43 GBS, QT locomotor test day 1, total distance travelled in 30min (cm)

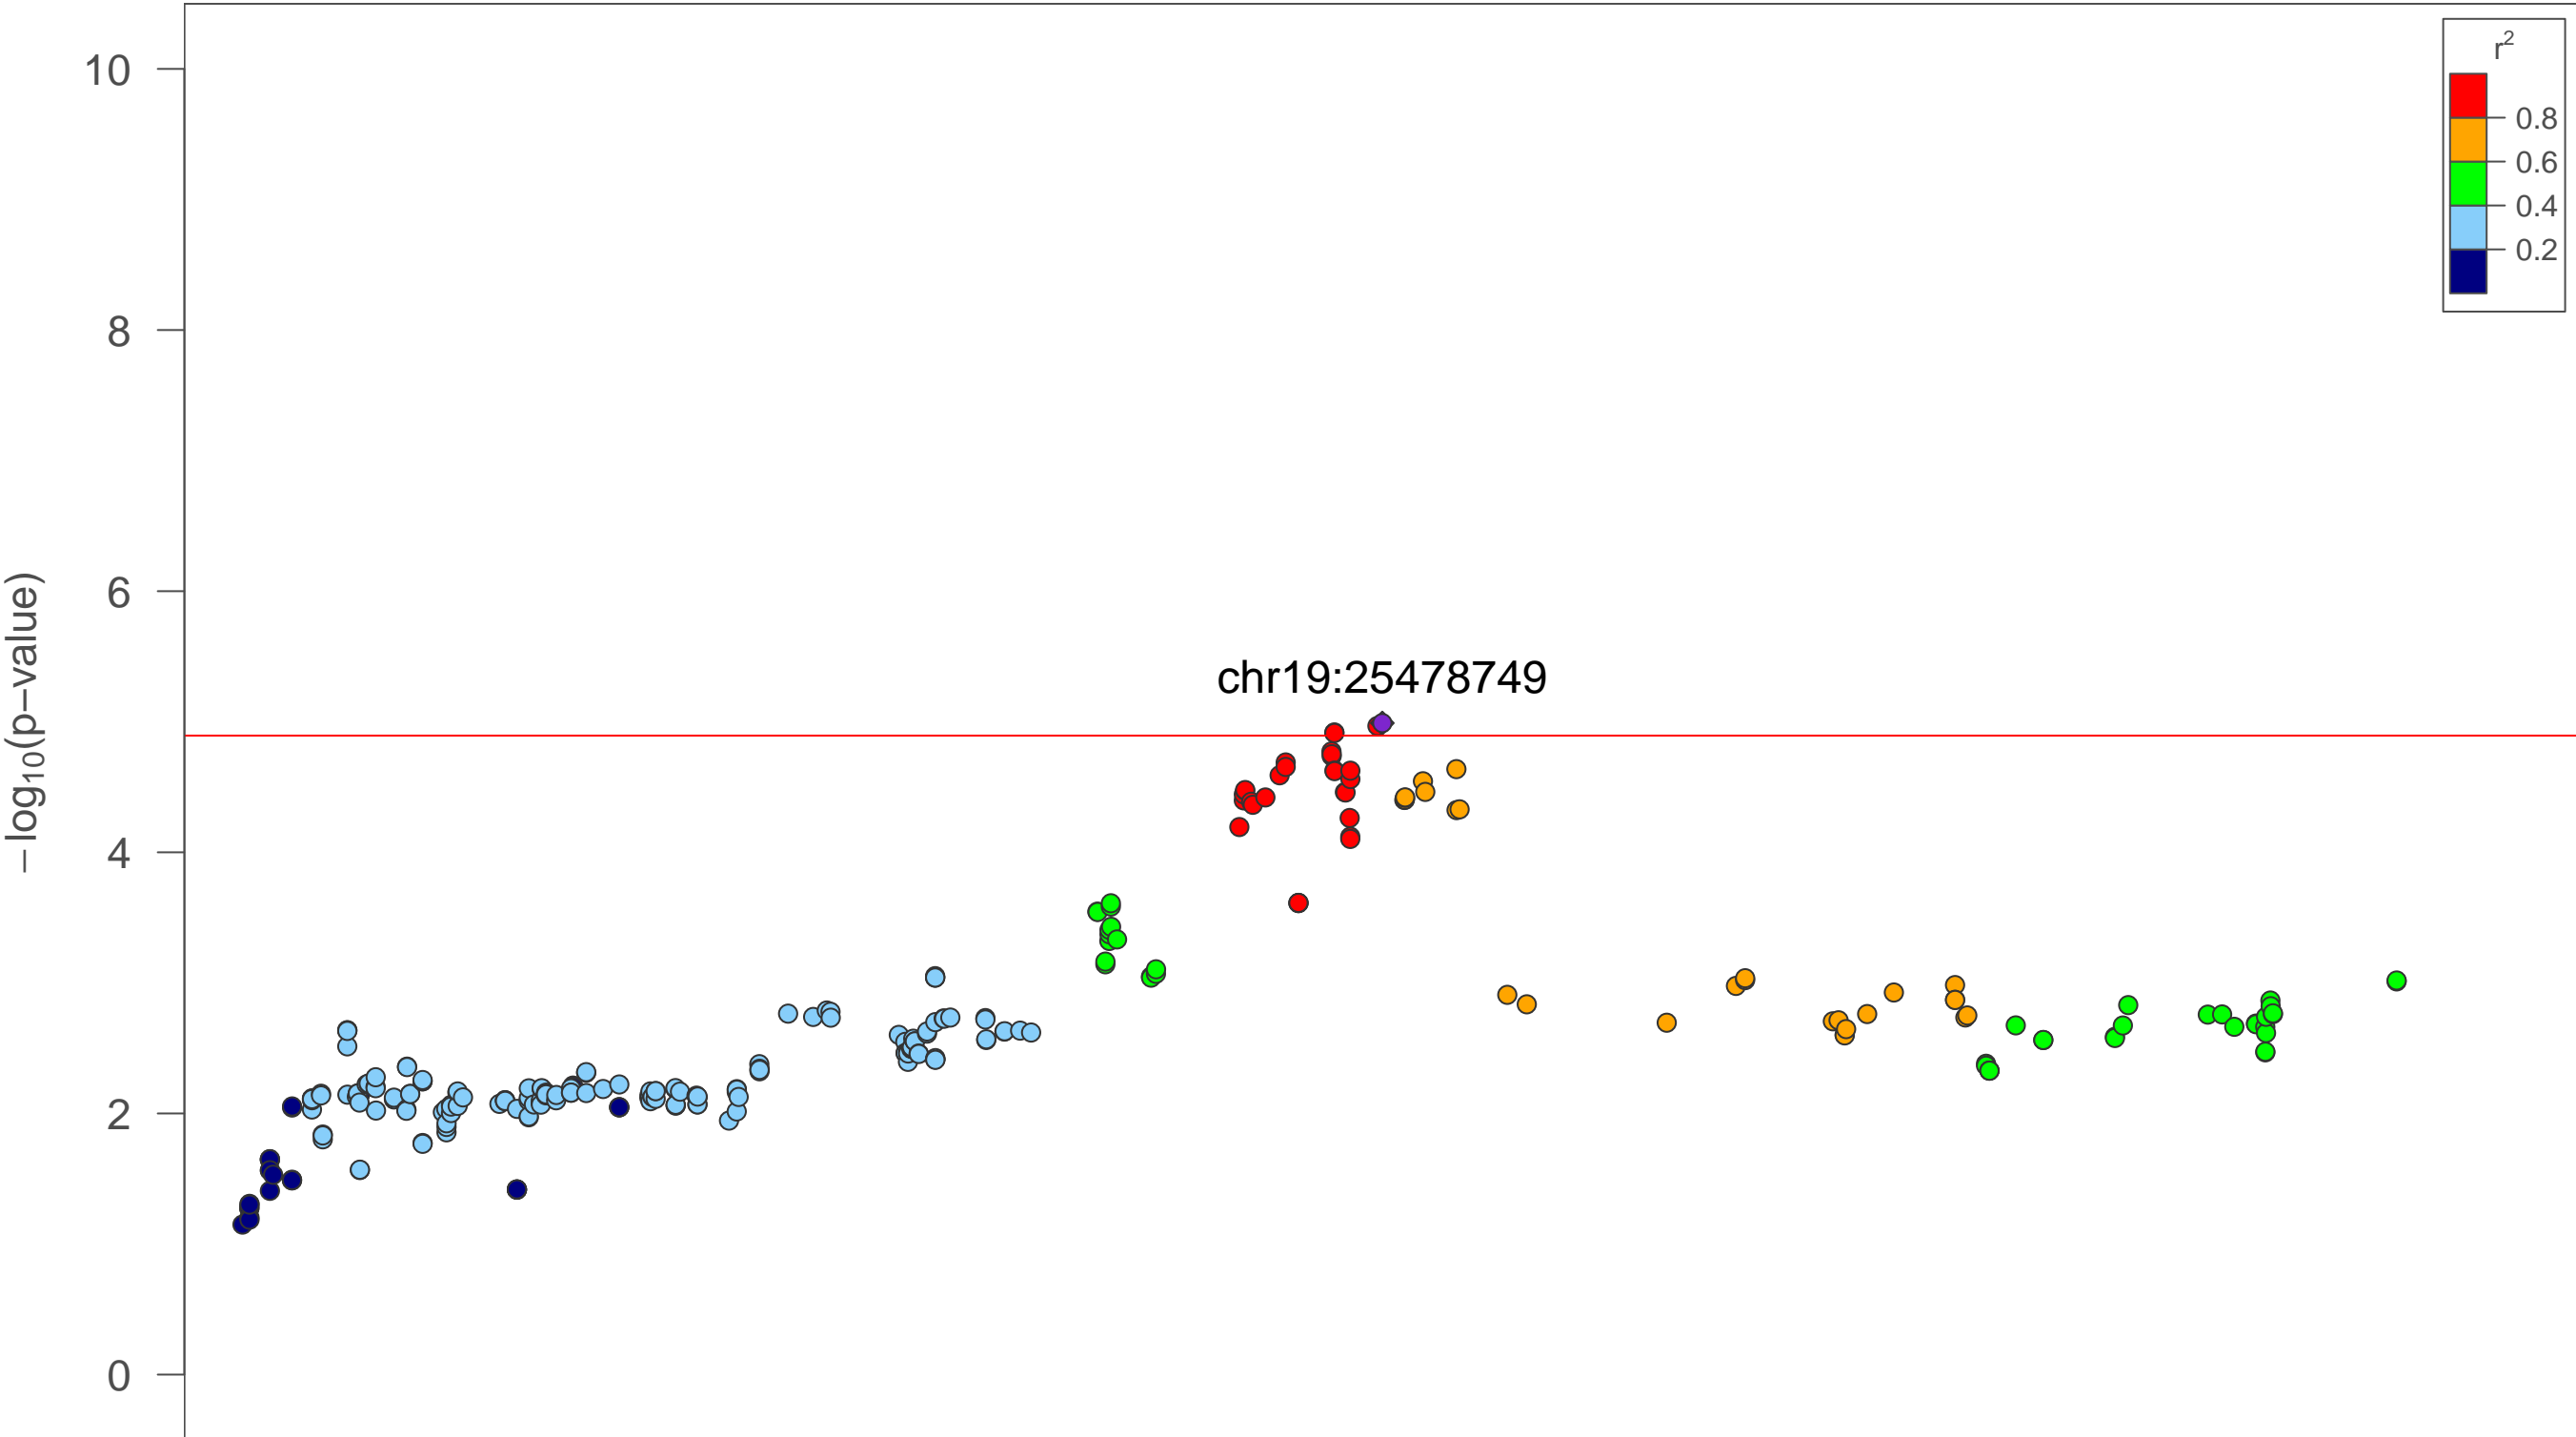

Credible Set

chr19:25478749

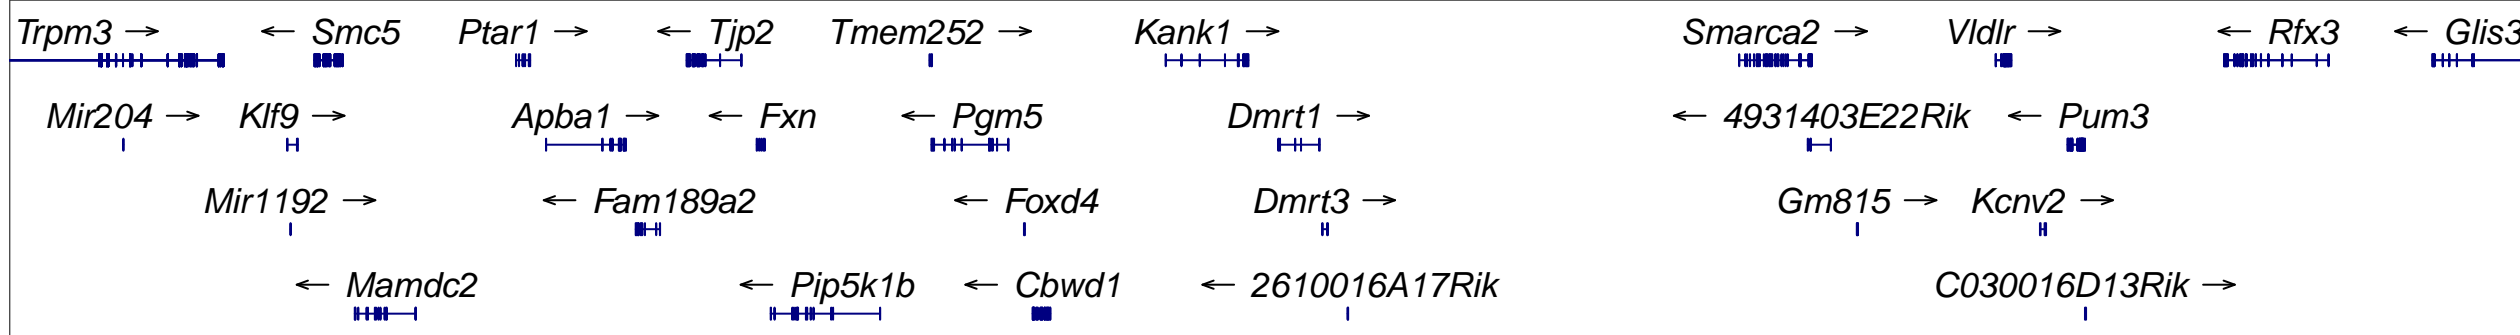

5 genes  
omitted

date: Thu Sep 12 17:17:02 2019

build: F3443GBS

display range: chr19:22478749–28478749 [22478749–28478749]

hilite range: 0 – 0 [ 0 – 0 ]

reference SNP: chr19:25478749

number of SNPs plotted: 295

min P-value: 1.02E–5 [chr19:25478749]

max P-value: 7.09E–2 [chr19:22624639]

omitted Genes: 1700028P14Rik, Fam122a, Mir3084–1

omitted Genes: Dock8, Dmrt2

## Fine-mapping Regions

| snp            | chr | pos (Mb) | pp          | group        | color  |
|----------------|-----|----------|-------------|--------------|--------|
| chr19:25120764 | 19  | 25.12076 | 0.014504037 | Credible Set | purple |
| chr19:25131980 | 19  | 25.13198 | 0.022628604 | Credible Set | purple |
| chr19:25132073 | 19  | 25.13207 | 0.025026763 | Credible Set | purple |
| chr19:25135354 | 19  | 25.13535 | 0.026728192 | Credible Set | purple |
| chr19:25135364 | 19  | 25.13536 | 0.026935500 | Credible Set | purple |
| chr19:25150355 | 19  | 25.15036 | 0.022135925 | Credible Set | purple |
| chr19:25154435 | 19  | 25.15443 | 0.021024980 | Credible Set | purple |
| chr19:25185988 | 19  | 25.18599 | 0.023788222 | Credible Set | purple |
| chr19:25221638 | 19  | 25.22164 | 0.034466211 | Credible Set | purple |
| chr19:25236799 | 19  | 25.23680 | 0.042784666 | Credible Set | purple |
| chr19:25236833 | 19  | 25.23683 | 0.039667952 | Credible Set | purple |
| chr19:25268827 | 19  | 25.26883 | 0.004111366 | Credible Set | purple |
| chr19:25351464 | 19  | 25.35146 | 0.051472220 | Credible Set | purple |
| chr19:25351973 | 19  | 25.35197 | 0.047575828 | Credible Set | purple |
| chr19:25351999 | 19  | 25.35200 | 0.049083731 | Credible Set | purple |
| chr19:25358713 | 19  | 25.35871 | 0.070870564 | Credible Set | purple |
| chr19:25358747 | 19  | 25.35875 | 0.070158182 | Credible Set | purple |
| chr19:25359143 | 19  | 25.35914 | 0.037367601 | Credible Set | purple |
| chr19:25359220 | 19  | 25.35922 | 0.036969093 | Credible Set | purple |
| chr19:25385103 | 19  | 25.38510 | 0.026025842 | Credible Set | purple |
| chr19:25386713 | 19  | 25.38671 | 0.025836550 | Credible Set | purple |
| chr19:25397059 | 19  | 25.39706 | 0.016879120 | Credible Set | purple |
| chr19:25398520 | 19  | 25.39852 | 0.012358205 | Credible Set | purple |
| chr19:25398528 | 19  | 25.39853 | 0.011890533 | Credible Set | purple |
| chr19:25398751 | 19  | 25.39875 | 0.032357754 | Credible Set | purple |
| chr19:25398757 | 19  | 25.39876 | 0.037266089 | Credible Set | purple |
| chr19:25466545 | 19  | 25.46654 | 0.078989179 | Credible Set | purple |
| chr19:25478749 | 19  | 25.47875 | 0.082894984 | Credible Set | purple |

F34, F39–43 GBS, QT locomotor test day 2, total distance travelled in 30min (cm)

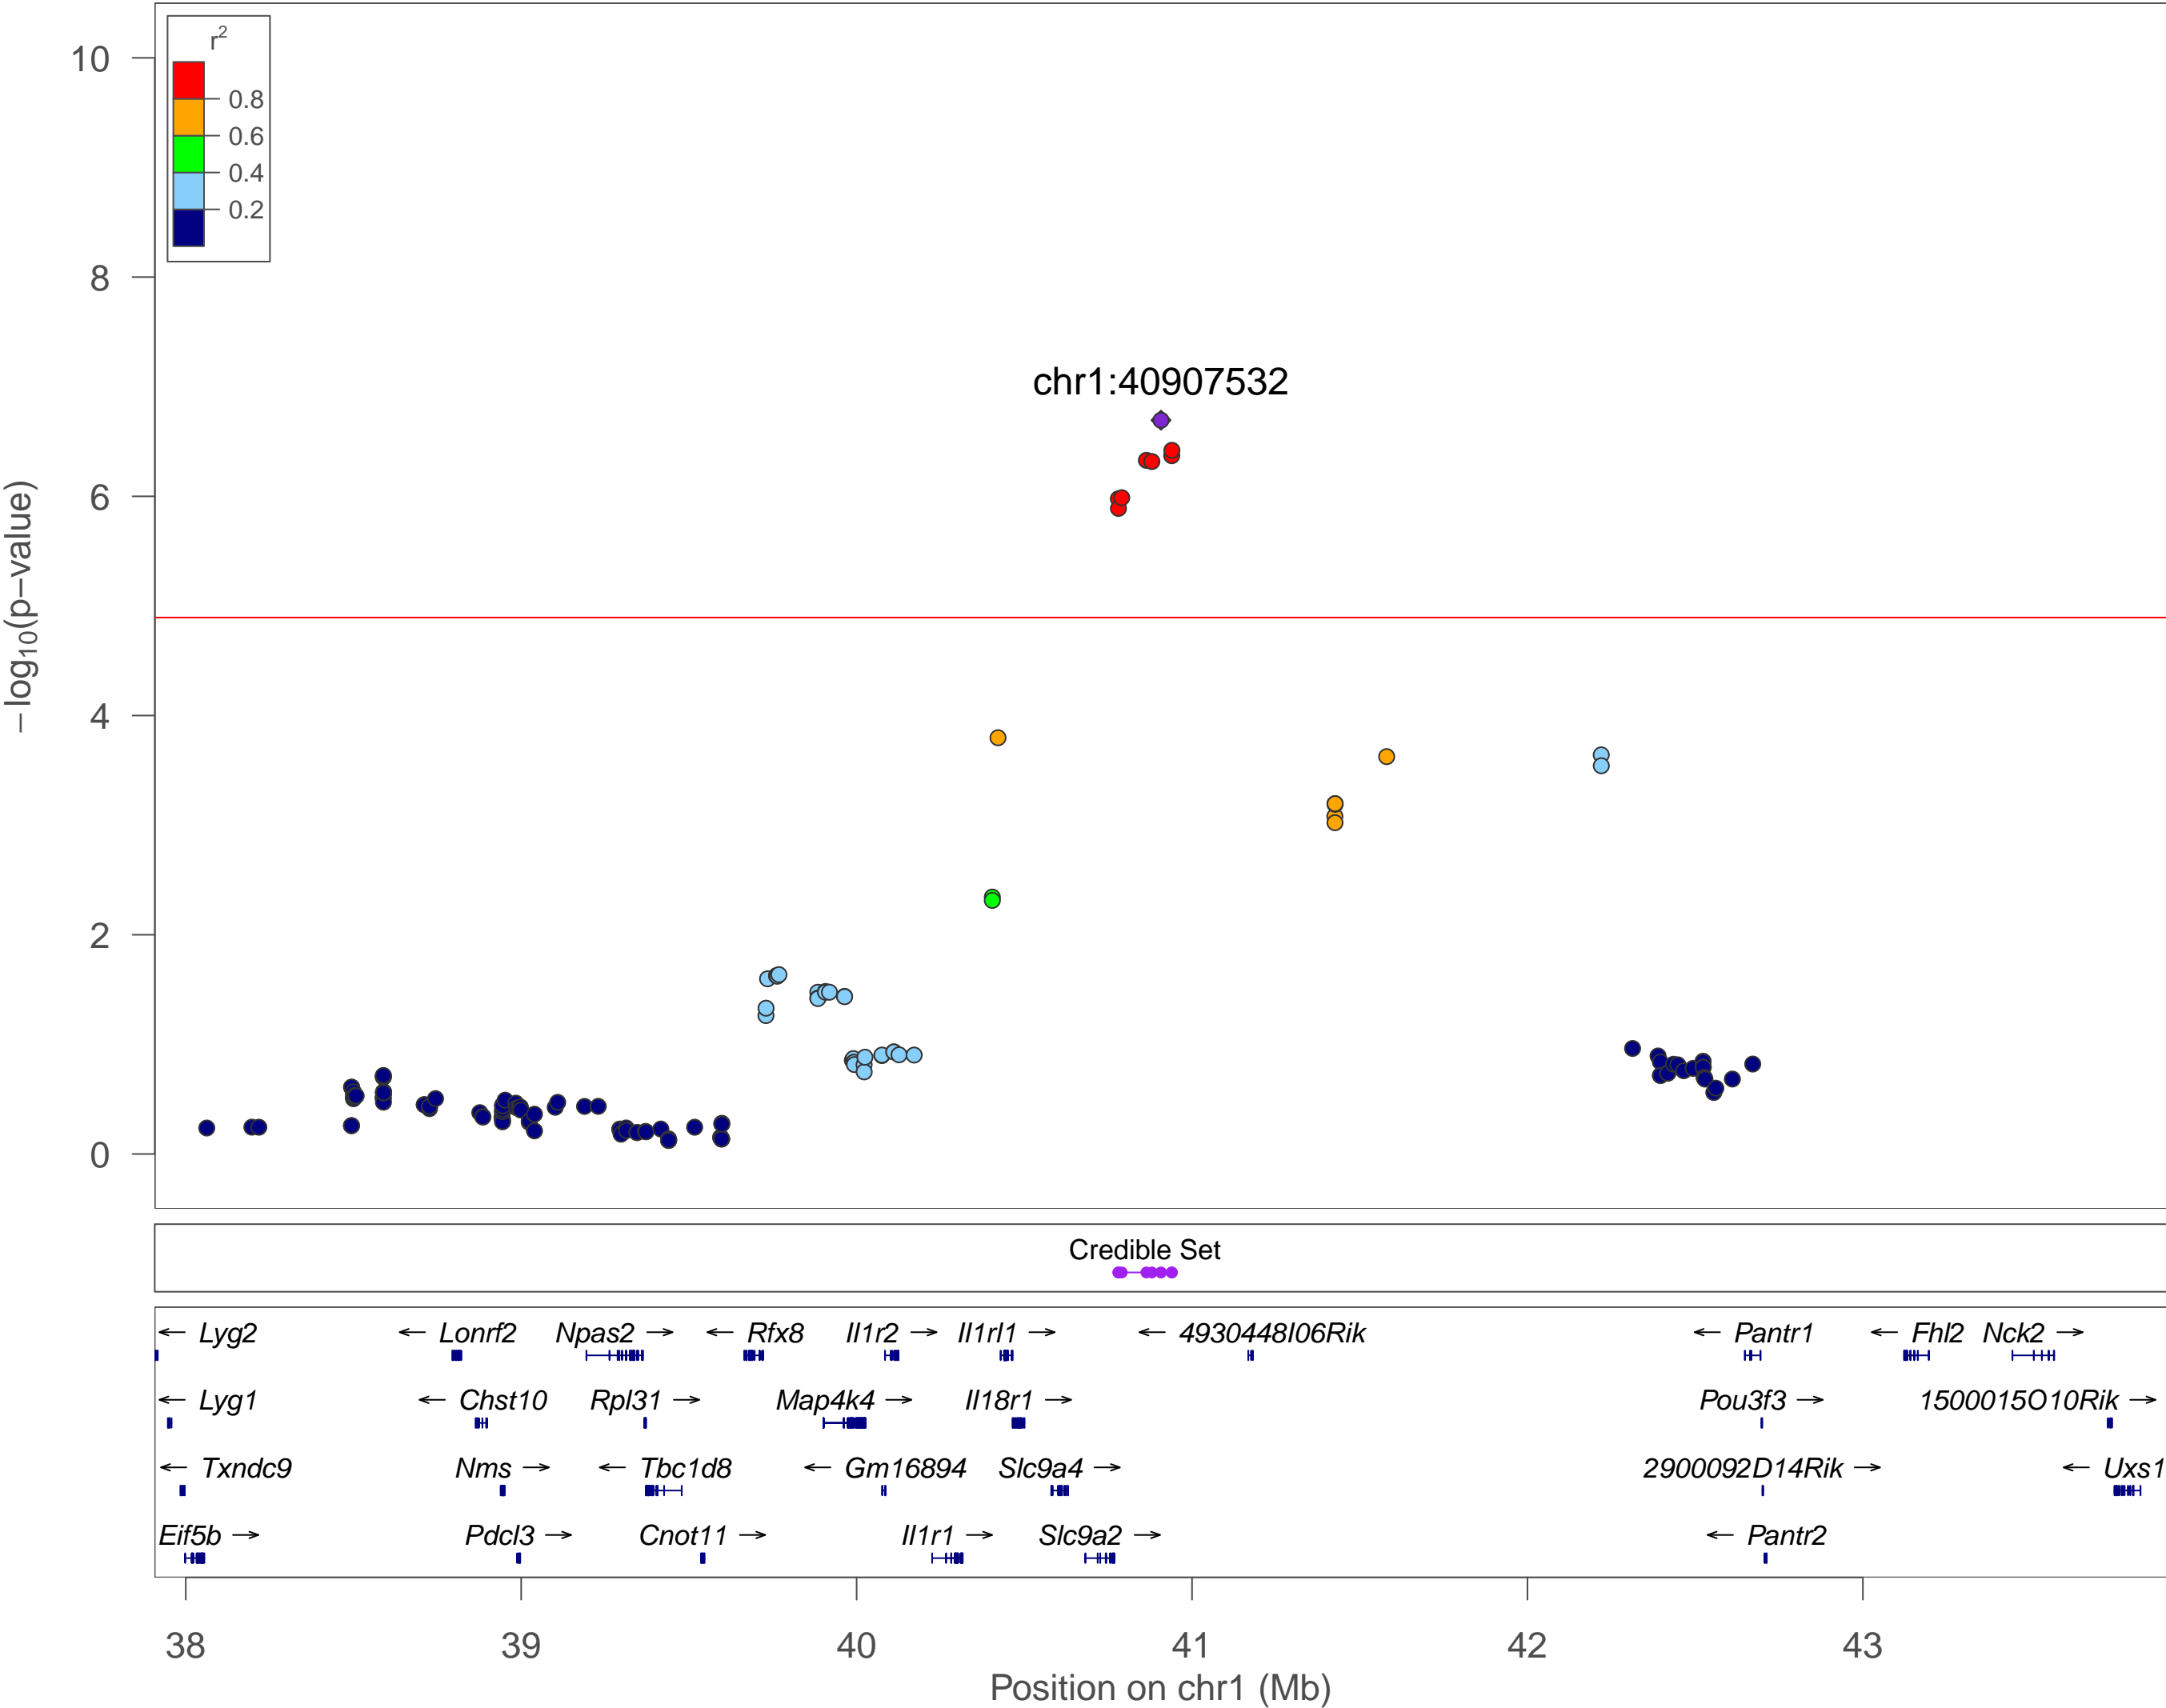

date: Thu Sep 12 16:49:12 2019

build: F3443GBS

display range: chr1:37907532–43907532 [37907532–43907532]

hilite range: 0 – 0 [ 0 – 0 ]

reference SNP: chr1:40907532

number of SNPs plotted: 151

min P-value: 2.02E–7 [chr1:40907532]

max P-value: 7.53E–1 [chr1:39439521]

omitted Genes: Rev1, Aff3, Mir6349

omitted Genes: Snord89, Rnf149, Creg2

omitted Genes: Gm3646, 1700066B17Rik, Il1rl2

omitted Genes: Il18rap, Mfsd9, Tmem182

omitted Genes: Dalir, Mrps9, Gpr45

omitted Genes: Tgfbrap1, Al597479

Fine-mapping Regions

| snp           | chr | pos (Mb) | pp         | group        | color  |
|---------------|-----|----------|------------|--------------|--------|
| chr1:40780351 | 1   | 40.78035 | 0.06172370 | Credible Set | purple |
| chr1:40780677 | 1   | 40.78068 | 0.05986715 | Credible Set | purple |
| chr1:40790450 | 1   | 40.79045 | 0.07064687 | Credible Set | purple |
| chr1:40863930 | 1   | 40.86393 | 0.11882693 | Credible Set | purple |
| chr1:40880208 | 1   | 40.88021 | 0.11529661 | Credible Set | purple |
| chr1:40907532 | 1   | 40.90753 | 0.30791953 | Credible Set | purple |
| chr1:40939551 | 1   | 40.93955 | 0.12326001 | Credible Set | purple |
| chr1:40939963 | 1   | 40.93996 | 0.14075209 | Credible Set | purple |

# F34, F39–43 GBS, QT locomotor test day 2, total distance travelled in 30min (cm)

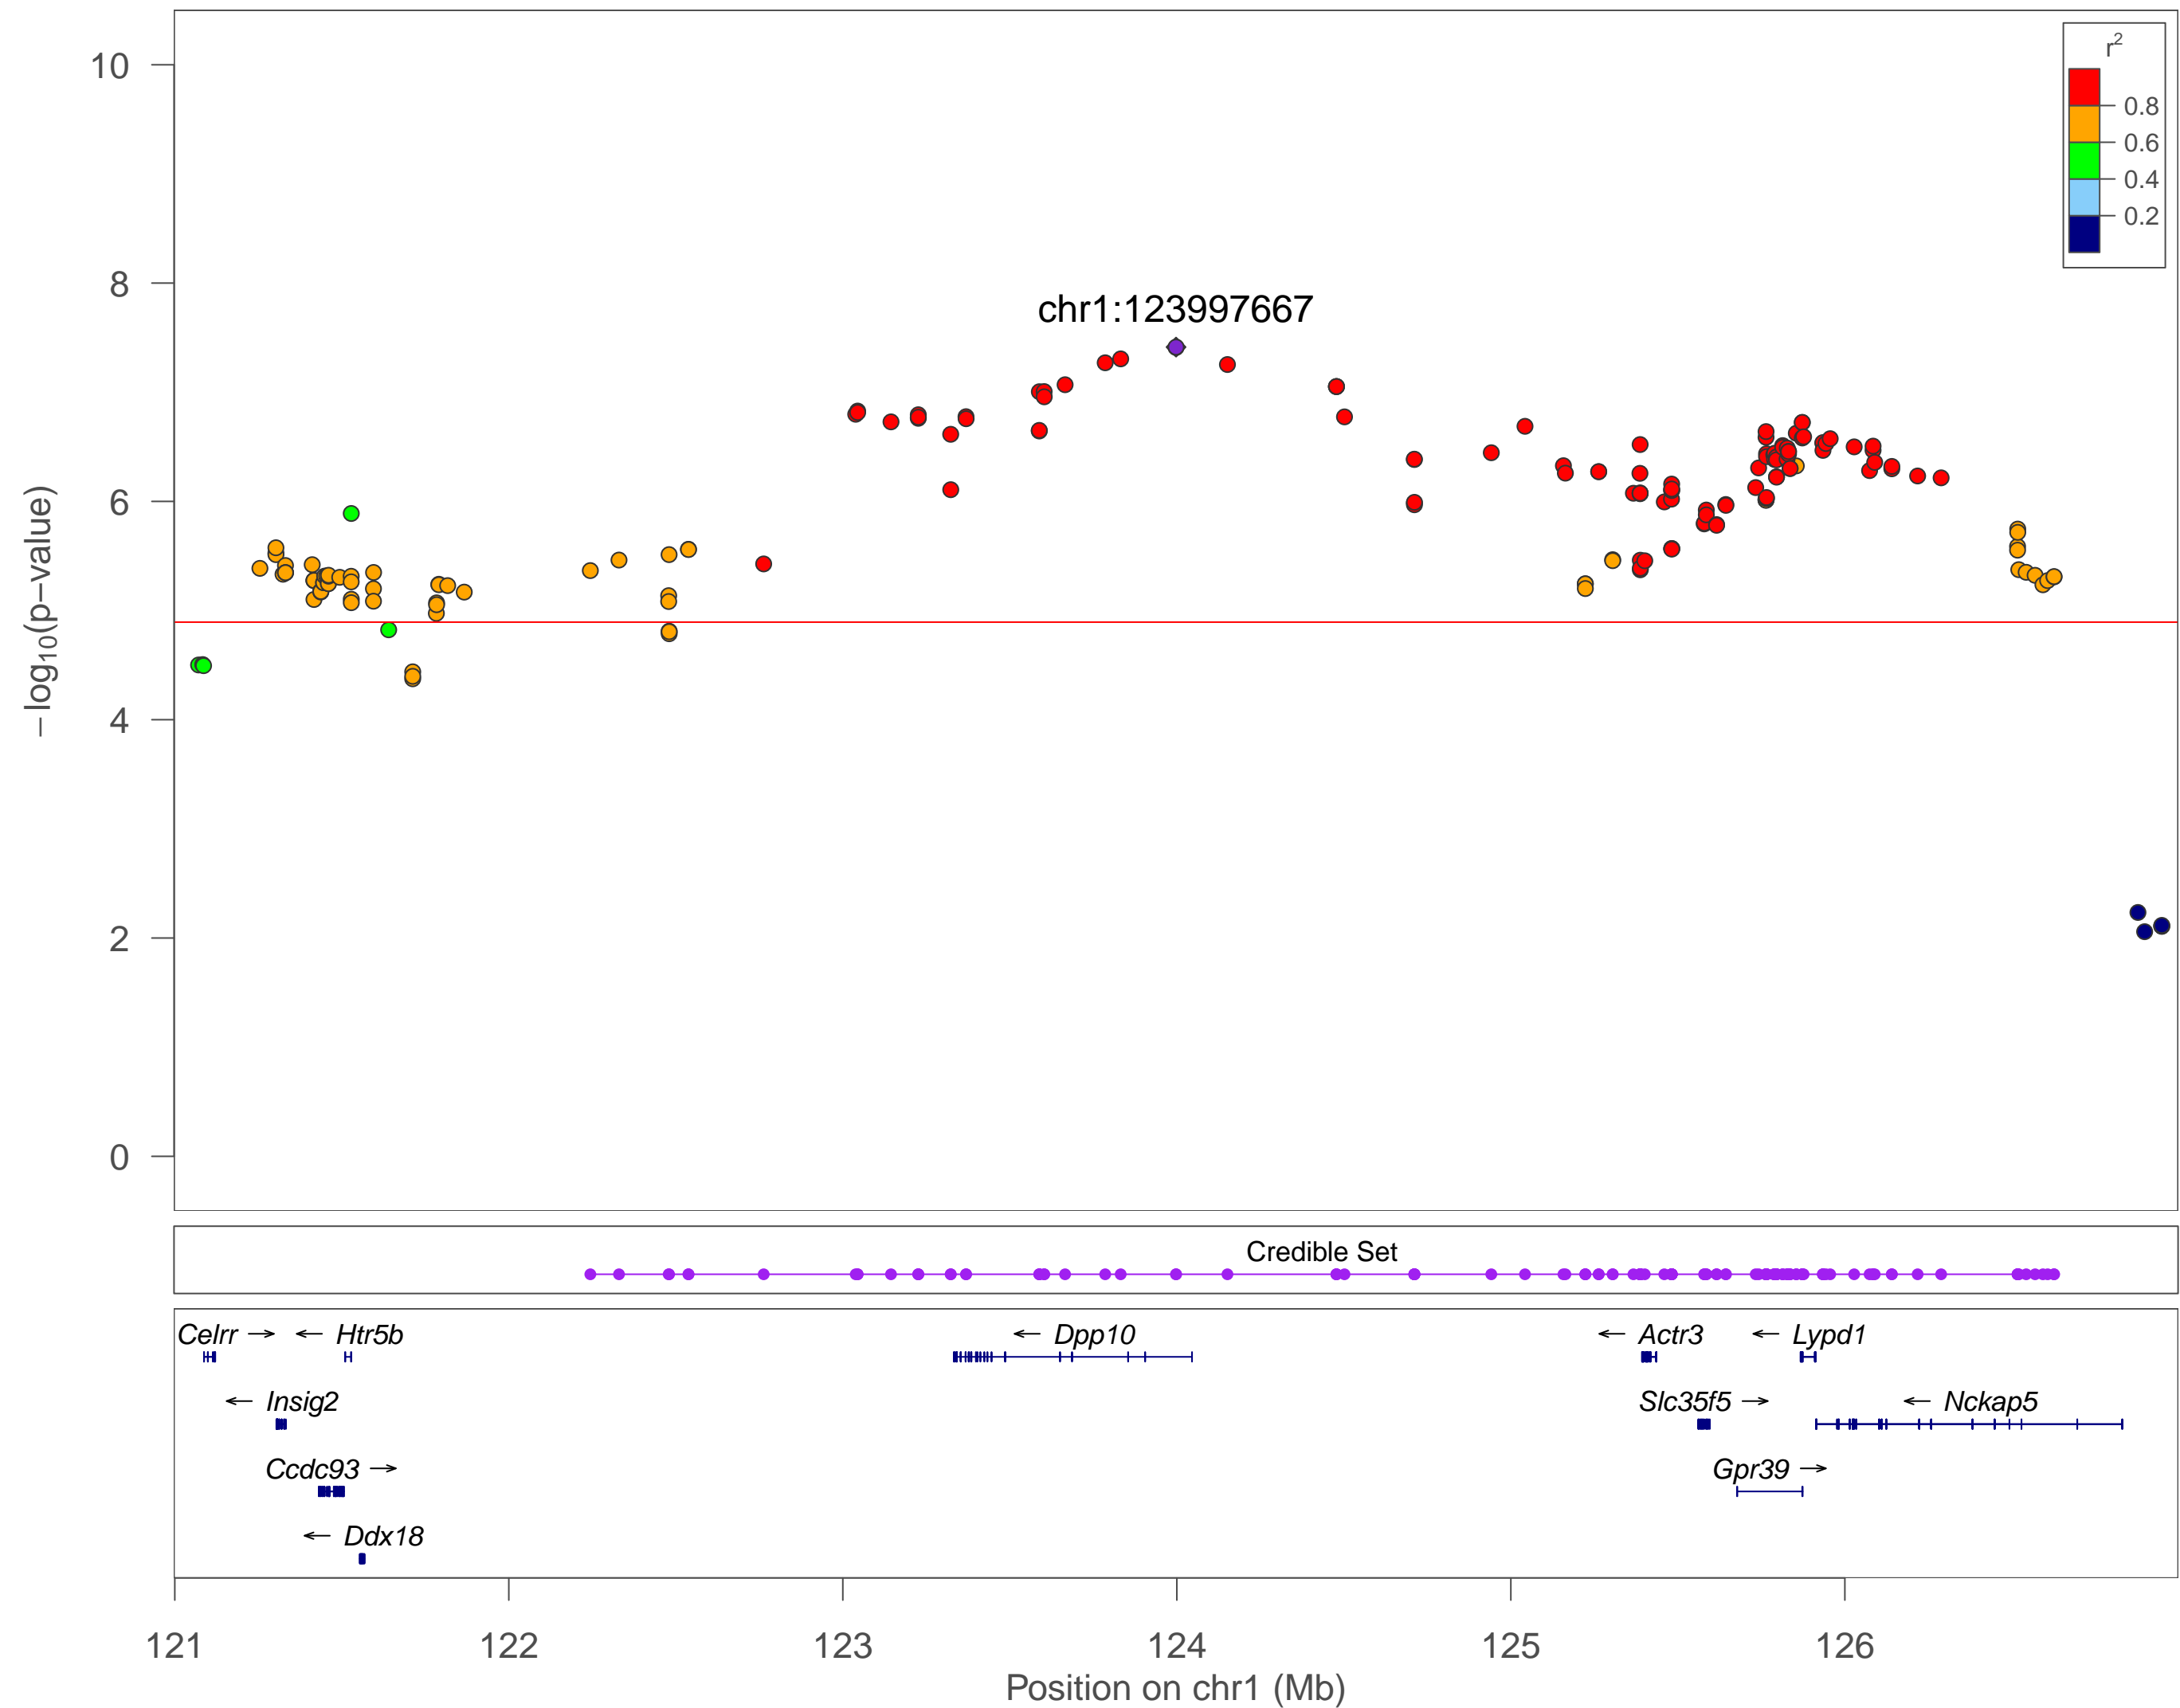

date: Thu Sep 12 16:48:23 2019

build: F3443GBS

display range: chr1:120997667–126997667 [120997667–126997667]

hilite range: 0 – 0 [ 0 – 0 ]

reference SNP: chr1:123997667

number of SNPs plotted: 192

min P-value: 3.86E–8 [chr1:123997667]

max P-value: 8.75E–3 [chr1:126897506]



## Fine-mapping Regions

| snp            | chr | pos (Mb) | pp           | group        | color  |
|----------------|-----|----------|--------------|--------------|--------|
| chr1:122244126 | 1   | 122.2441 | 0.0004903082 | Credible Set | purple |
| chr1:122329939 | 1   | 122.3299 | 0.0008148947 | Credible Set | purple |
| chr1:122478661 | 1   | 122.4787 | 0.0004268443 | Credible Set | purple |
| chr1:122479820 | 1   | 122.4798 | 0.0009423059 | Credible Set | purple |
| chr1:122537959 | 1   | 122.5380 | 0.0009876355 | Credible Set | purple |
| chr1:122537965 | 1   | 122.5380 | 0.0009820829 | Credible Set | purple |
| chr1:122763062 | 1   | 122.7631 | 0.0006076905 | Credible Set | purple |
| chr1:123038644 | 1   | 123.0386 | 0.0105359940 | Credible Set | purple |
| chr1:123044323 | 1   | 123.0443 | 0.0108297003 | Credible Set | purple |
| chr1:123044326 | 1   | 123.0443 | 0.0105701772 | Credible Set | purple |
| chr1:123144261 | 1   | 123.1443 | 0.0092520042 | Credible Set | purple |
| chr1:123225956 | 1   | 123.2260 | 0.0143077783 | Credible Set | purple |
| chr1:123225957 | 1   | 123.2260 | 0.0153422625 | Credible Set | purple |
| chr1:123225968 | 1   | 123.2260 | 0.0147604770 | Credible Set | purple |
| chr1:123322958 | 1   | 123.3230 | 0.0071220973 | Credible Set | purple |
| chr1:123323170 | 1   | 123.3232 | 0.0033211934 | Credible Set | purple |
| chr1:123368825 | 1   | 123.3688 | 0.0103264600 | Credible Set | purple |
| chr1:123369170 | 1   | 123.3692 | 0.0099007839 | Credible Set | purple |
| chr1:123588206 | 1   | 123.5882 | 0.0088544693 | Credible Set | purple |
| chr1:123588207 | 1   | 123.5882 | 0.0089696864 | Credible Set | purple |
| chr1:123588436 | 1   | 123.5884 | 0.0161548047 | Credible Set | purple |
| chr1:123602768 | 1   | 123.6028 | 0.0162473028 | Credible Set | purple |
| chr1:123603027 | 1   | 123.6030 | 0.0148698308 | Credible Set | purple |
| chr1:123665450 | 1   | 123.6655 | 0.0166282059 | Credible Set | purple |
| chr1:123785564 | 1   | 123.7856 | 0.0292567643 | Credible Set | purple |
| chr1:123831927 | 1   | 123.8319 | 0.0312091390 | Credible Set | purple |
| chr1:123997640 | 1   | 123.9976 | 0.0399908086 | Credible Set | purple |
| chr1:123997667 | 1   | 123.9977 | 0.0402157526 | Credible Set | purple |
| chr1:124151549 | 1   | 124.1515 | 0.0283530813 | Credible Set | purple |
| chr1:124477860 | 1   | 124.4779 | 0.0155127462 | Credible Set | purple |
| chr1:124477885 | 1   | 124.4779 | 0.0155113663 | Credible Set | purple |
| chr1:124477894 | 1   | 124.4779 | 0.0155030859 | Credible Set | purple |
| chr1:124501960 | 1   | 124.5020 | 0.0101347481 | Credible Set | purple |
| chr1:124711052 | 1   | 124.7111 | 0.0045281643 | Credible Set | purple |
| chr1:124711083 | 1   | 124.7111 | 0.0045825212 | Credible Set | purple |
| chr1:124711275 | 1   | 124.7113 | 0.0024175564 | Credible Set | purple |

## Fine-mapping Regions

| snp            | chr | pos (Mb) | pp           | group        | color  |
|----------------|-----|----------|--------------|--------------|--------|
| chr1:124711325 | 1   | 124.7113 | 0.0023088137 | Credible Set | purple |
| chr1:124711335 | 1   | 124.7113 | 0.0024196556 | Credible Set | purple |
| chr1:124941492 | 1   | 124.9415 | 0.0054660111 | Credible Set | purple |
| chr1:125042386 | 1   | 125.0424 | 0.0087226482 | Credible Set | purple |
| chr1:125157478 | 1   | 125.1575 | 0.0063609133 | Credible Set | purple |
| chr1:125163273 | 1   | 125.1633 | 0.0062276759 | Credible Set | purple |
| chr1:125223006 | 1   | 125.2230 | 0.0005088348 | Credible Set | purple |
| chr1:125223009 | 1   | 125.2230 | 0.0005088348 | Credible Set | purple |
| chr1:125223046 | 1   | 125.2230 | 0.0005021901 | Credible Set | purple |
| chr1:125263025 | 1   | 125.2630 | 0.0040982744 | Credible Set | purple |
| chr1:125263026 | 1   | 125.2630 | 0.0041004478 | Credible Set | purple |
| chr1:125304903 | 1   | 125.3049 | 0.0007813838 | Credible Set | purple |
| chr1:125304912 | 1   | 125.3049 | 0.0007676780 | Credible Set | purple |
| chr1:125367002 | 1   | 125.3670 | 0.0034692504 | Credible Set | purple |
| chr1:125386497 | 1   | 125.3865 | 0.0055058241 | Credible Set | purple |
| chr1:125387017 | 1   | 125.3870 | 0.0040882844 | Credible Set | purple |
| chr1:125387048 | 1   | 125.3870 | 0.0041482947 | Credible Set | purple |
| chr1:125387071 | 1   | 125.3871 | 0.0041235193 | Credible Set | purple |
| chr1:125387095 | 1   | 125.3871 | 0.0079296964 | Credible Set | purple |
| chr1:125387647 | 1   | 125.3876 | 0.0012946389 | Credible Set | purple |
| chr1:125387695 | 1   | 125.3877 | 0.0010148964 | Credible Set | purple |
| chr1:125387731 | 1   | 125.3877 | 0.0010996618 | Credible Set | purple |
| chr1:125400951 | 1   | 125.4010 | 0.0011622511 | Credible Set | purple |
| chr1:125459470 | 1   | 125.4595 | 0.0039806373 | Credible Set | purple |
| chr1:125481066 | 1   | 125.4811 | 0.0043636840 | Credible Set | purple |
| chr1:125481498 | 1   | 125.4815 | 0.0052983069 | Credible Set | purple |
| chr1:125481527 | 1   | 125.4815 | 0.0058011130 | Credible Set | purple |
| chr1:125481552 | 1   | 125.4816 | 0.0059309355 | Credible Set | purple |
| chr1:125481575 | 1   | 125.4816 | 0.0061860407 | Credible Set | purple |
| chr1:125481715 | 1   | 125.4817 | 0.0018744570 | Credible Set | purple |
| chr1:125481739 | 1   | 125.4817 | 0.0018663804 | Credible Set | purple |
| chr1:125481758 | 1   | 125.4818 | 0.0018478106 | Credible Set | purple |
| chr1:125578885 | 1   | 125.5789 | 0.0027072511 | Credible Set | purple |
| chr1:125579353 | 1   | 125.5794 | 0.0025801466 | Credible Set | purple |
| chr1:125585192 | 1   | 125.5852 | 0.0033353646 | Credible Set | purple |
| chr1:125585252 | 1   | 125.5853 | 0.0030090719 | Credible Set | purple |

## Fine-mapping Regions

| snp            | chr | pos (Mb) | pp          | group        | color  |
|----------------|-----|----------|-------------|--------------|--------|
| chr1:125615959 | 1   | 125.6160 | 0.002143989 | Credible Set | purple |
| chr1:125616002 | 1   | 125.6160 | 0.002105905 | Credible Set | purple |
| chr1:125643547 | 1   | 125.6435 | 0.003029906 | Credible Set | purple |
| chr1:125643933 | 1   | 125.6439 | 0.002981420 | Credible Set | purple |
| chr1:125733123 | 1   | 125.7331 | 0.004132891 | Credible Set | purple |
| chr1:125741798 | 1   | 125.7418 | 0.005594995 | Credible Set | purple |
| chr1:125763925 | 1   | 125.7639 | 0.001064615 | Credible Set | purple |
| chr1:125763932 | 1   | 125.7639 | 0.001047431 | Credible Set | purple |
| chr1:125763954 | 1   | 125.7640 | 0.001036705 | Credible Set | purple |
| chr1:125764061 | 1   | 125.7641 | 0.005186193 | Credible Set | purple |
| chr1:125764120 | 1   | 125.7641 | 0.005863553 | Credible Set | purple |
| chr1:125765305 | 1   | 125.7653 | 0.002961500 | Credible Set | purple |
| chr1:125765343 | 1   | 125.7653 | 0.003030144 | Credible Set | purple |
| chr1:125765591 | 1   | 125.7656 | 0.005999995 | Credible Set | purple |
| chr1:125765595 | 1   | 125.7656 | 0.005596416 | Credible Set | purple |
| chr1:125787309 | 1   | 125.7873 | 0.008358578 | Credible Set | purple |
| chr1:125789544 | 1   | 125.7895 | 0.007507642 | Credible Set | purple |
| chr1:125789598 | 1   | 125.7896 | 0.008249921 | Credible Set | purple |
| chr1:125795230 | 1   | 125.7952 | 0.008084976 | Credible Set | purple |
| chr1:125795318 | 1   | 125.7953 | 0.007765262 | Credible Set | purple |
| chr1:125795437 | 1   | 125.7954 | 0.005770947 | Credible Set | purple |
| chr1:125795438 | 1   | 125.7954 | 0.005722316 | Credible Set | purple |
| chr1:125813871 | 1   | 125.8139 | 0.010016287 | Credible Set | purple |
| chr1:125813926 | 1   | 125.8139 | 0.009620435 | Credible Set | purple |
| chr1:125826985 | 1   | 125.8270 | 0.007989308 | Credible Set | purple |
| chr1:125827492 | 1   | 125.8275 | 0.010567789 | Credible Set | purple |
| chr1:125831250 | 1   | 125.8312 | 0.009440007 | Credible Set | purple |
| chr1:125831282 | 1   | 125.8313 | 0.009222145 | Credible Set | purple |
| chr1:125831293 | 1   | 125.8313 | 0.009417136 | Credible Set | purple |
| chr1:125836037 | 1   | 125.8360 | 0.006652284 | Credible Set | purple |
| chr1:125836053 | 1   | 125.8361 | 0.006663062 | Credible Set | purple |
| chr1:125854611 | 1   | 125.8546 | 0.002404758 | Credible Set | purple |
| chr1:125854689 | 1   | 125.8547 | 0.015798016 | Credible Set | purple |
| chr1:125872500 | 1   | 125.8725 | 0.022506677 | Credible Set | purple |
| chr1:125872503 | 1   | 125.8725 | 0.022568951 | Credible Set | purple |
| chr1:125872524 | 1   | 125.8725 | 0.016672525 | Credible Set | purple |

Fine-mapping Regions

| snp            | chr | pos (Mb) | pp           | group        | color  |
|----------------|-----|----------|--------------|--------------|--------|
| chr1:125876478 | 1   | 125.8765 | 0.0170061955 | Credible Set | purple |
| chr1:125934259 | 1   | 125.9343 | 0.0102824615 | Credible Set | purple |
| chr1:125934293 | 1   | 125.9343 | 0.0105250827 | Credible Set | purple |
| chr1:125934498 | 1   | 125.9345 | 0.0104563469 | Credible Set | purple |
| chr1:125943250 | 1   | 125.9433 | 0.0120878356 | Credible Set | purple |
| chr1:125956049 | 1   | 125.9560 | 0.0131811482 | Credible Set | purple |
| chr1:126027899 | 1   | 126.0279 | 0.0110656412 | Credible Set | purple |
| chr1:126074088 | 1   | 126.0741 | 0.0063421823 | Credible Set | purple |
| chr1:126084400 | 1   | 126.0844 | 0.0100321636 | Credible Set | purple |
| chr1:126084494 | 1   | 126.0845 | 0.0113075009 | Credible Set | purple |
| chr1:126089361 | 1   | 126.0894 | 0.0077924465 | Credible Set | purple |
| chr1:126140625 | 1   | 126.1406 | 0.0076302682 | Credible Set | purple |
| chr1:126140679 | 1   | 126.1407 | 0.0081340241 | Credible Set | purple |
| chr1:126217882 | 1   | 126.2179 | 0.0068068419 | Credible Set | purple |
| chr1:126288256 | 1   | 126.2883 | 0.0053548894 | Credible Set | purple |
| chr1:126517088 | 1   | 126.5171 | 0.0015054299 | Credible Set | purple |
| chr1:126517103 | 1   | 126.5171 | 0.0014040618 | Credible Set | purple |
| chr1:126517612 | 1   | 126.5176 | 0.0023518924 | Credible Set | purple |
| chr1:126517625 | 1   | 126.5176 | 0.0021296618 | Credible Set | purple |
| chr1:126520773 | 1   | 126.5208 | 0.0009017474 | Credible Set | purple |
| chr1:126542829 | 1   | 126.5428 | 0.0009419753 | Credible Set | purple |
| chr1:126569602 | 1   | 126.5696 | 0.0008551592 | Credible Set | purple |
| chr1:126593029 | 1   | 126.5930 | 0.0007262267 | Credible Set | purple |
| chr1:126607175 | 1   | 126.6072 | 0.0008477031 | Credible Set | purple |
| chr1:126626338 | 1   | 126.6263 | 0.0010380136 | Credible Set | purple |
| chr1:126626341 | 1   | 126.6263 | 0.0010228407 | Credible Set | purple |
