# Supplementary material
Source: publisher figshare collection journal article supplement (https://gsajournals.figshare.com/articles/dataset/_/11674221)

Replication Summary Statistics

Body Weight

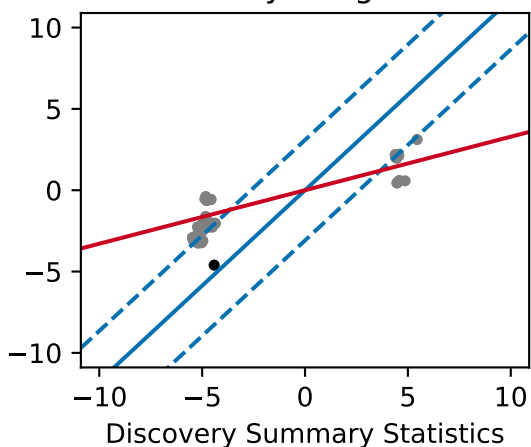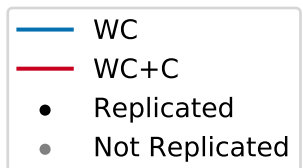

Replication Summary Statistics

Coat Color, Albino

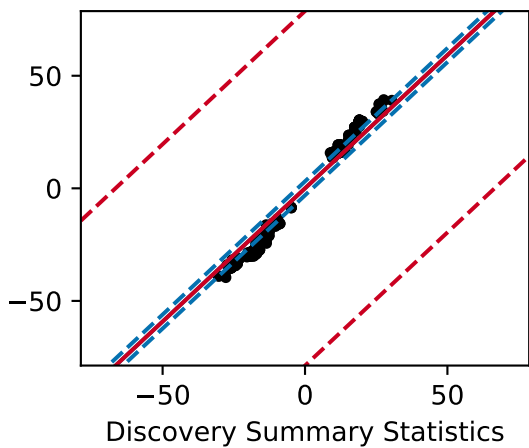

Replication Summary Statistics

Coat Color, Agouti

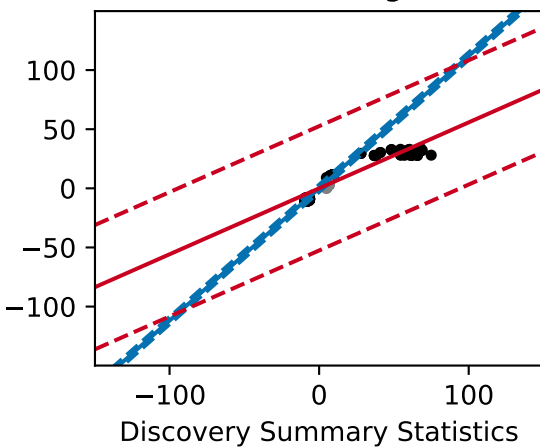

Replication Summary Statistics

Locomotor Activity, Day 1

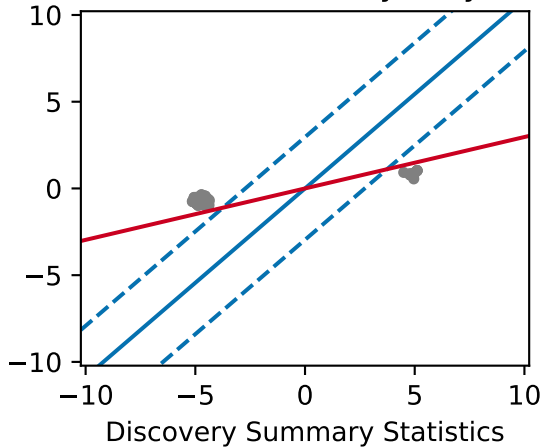

Replication Summary Statistics

Locomotor Activity, Day 2

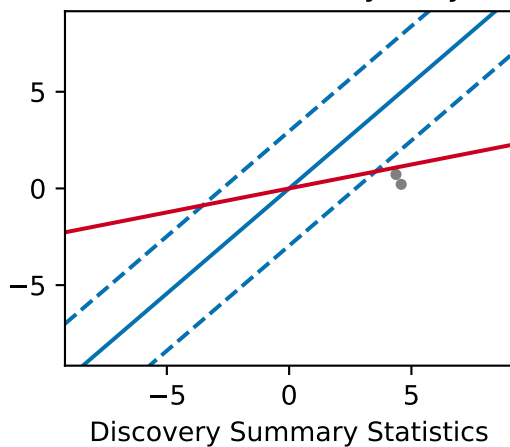

Supplement: Supplementary file 3 [file 2]
