# Supplementary material
Source: publisher figshare collection journal article supplement (https://gsajournals.figshare.com/articles/dataset/_/11674221)

GBS

missing

0  
=0%

0  
=0%

0  
=0%

0  
=0%

BB

14  
=0.048%

260  
=0.889%

8071  
=27.604%

5  
=0.017%

AB

103  
=0.352%

12640  
=43.231%

164  
=0.561%

8  
=0.027%

AA

7176  
=24.543%

615  
=2.103%

176  
=0.602%

6  
=0.021%

AA

AB

BB

missing

Array

Counts  
(Total=29,238)

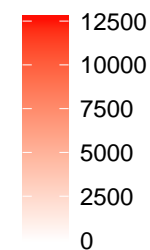

Supplement: Supplementary file [file 2]
